# Supplementary material for: Cellular Proteomic Profiling Using Proximity Labeling by TurboID-NES in Microglial and Neuronal Cell Lines
Source: PubMed Central journal article supplement (PMC10205547; doi:10.1016/j.mcpro.2023.100546), 2023-04-14

## **Annotated Spectra for protein identifications on the basis of a single unique peptide within the Whole Cell (WC) proteome.**

### **Description:**

b and y ion matches were annotated below and above each MS/MS spectrum and marked at the top of the centroided peak intensity by a small black or blue box, only for ions in the MS/MS spectrum within +/- 0.6 Da of the theoretical b or y ion mass.

(Ac) in the title of an annotated PSM PDF page, e.g.,“(Ac)PEPSEQ” indicates the primary amino acid sequence for the PSM, PEPSEQ, was matched by MaxQuant with a variablemodification monoisotopic mass shift for acetylation at the protein N-terminus (+42.010565 Da).

“ in the annotated PSM title, e.g., “PEM\*SEQ” indicates oxidation (+15.994915 Da) monoisotopic mass shift for the preceding methionine (M) residue.

^ in the title peptide sequence follows an asparagine (N) or glutamine (Q) residue and represents conversion to aspartate or glutamate, respectively, by deamidation, resulting in a +0.984016 Da monoisotopic mass increase for the preceding residue.

# LFVDTDADTR

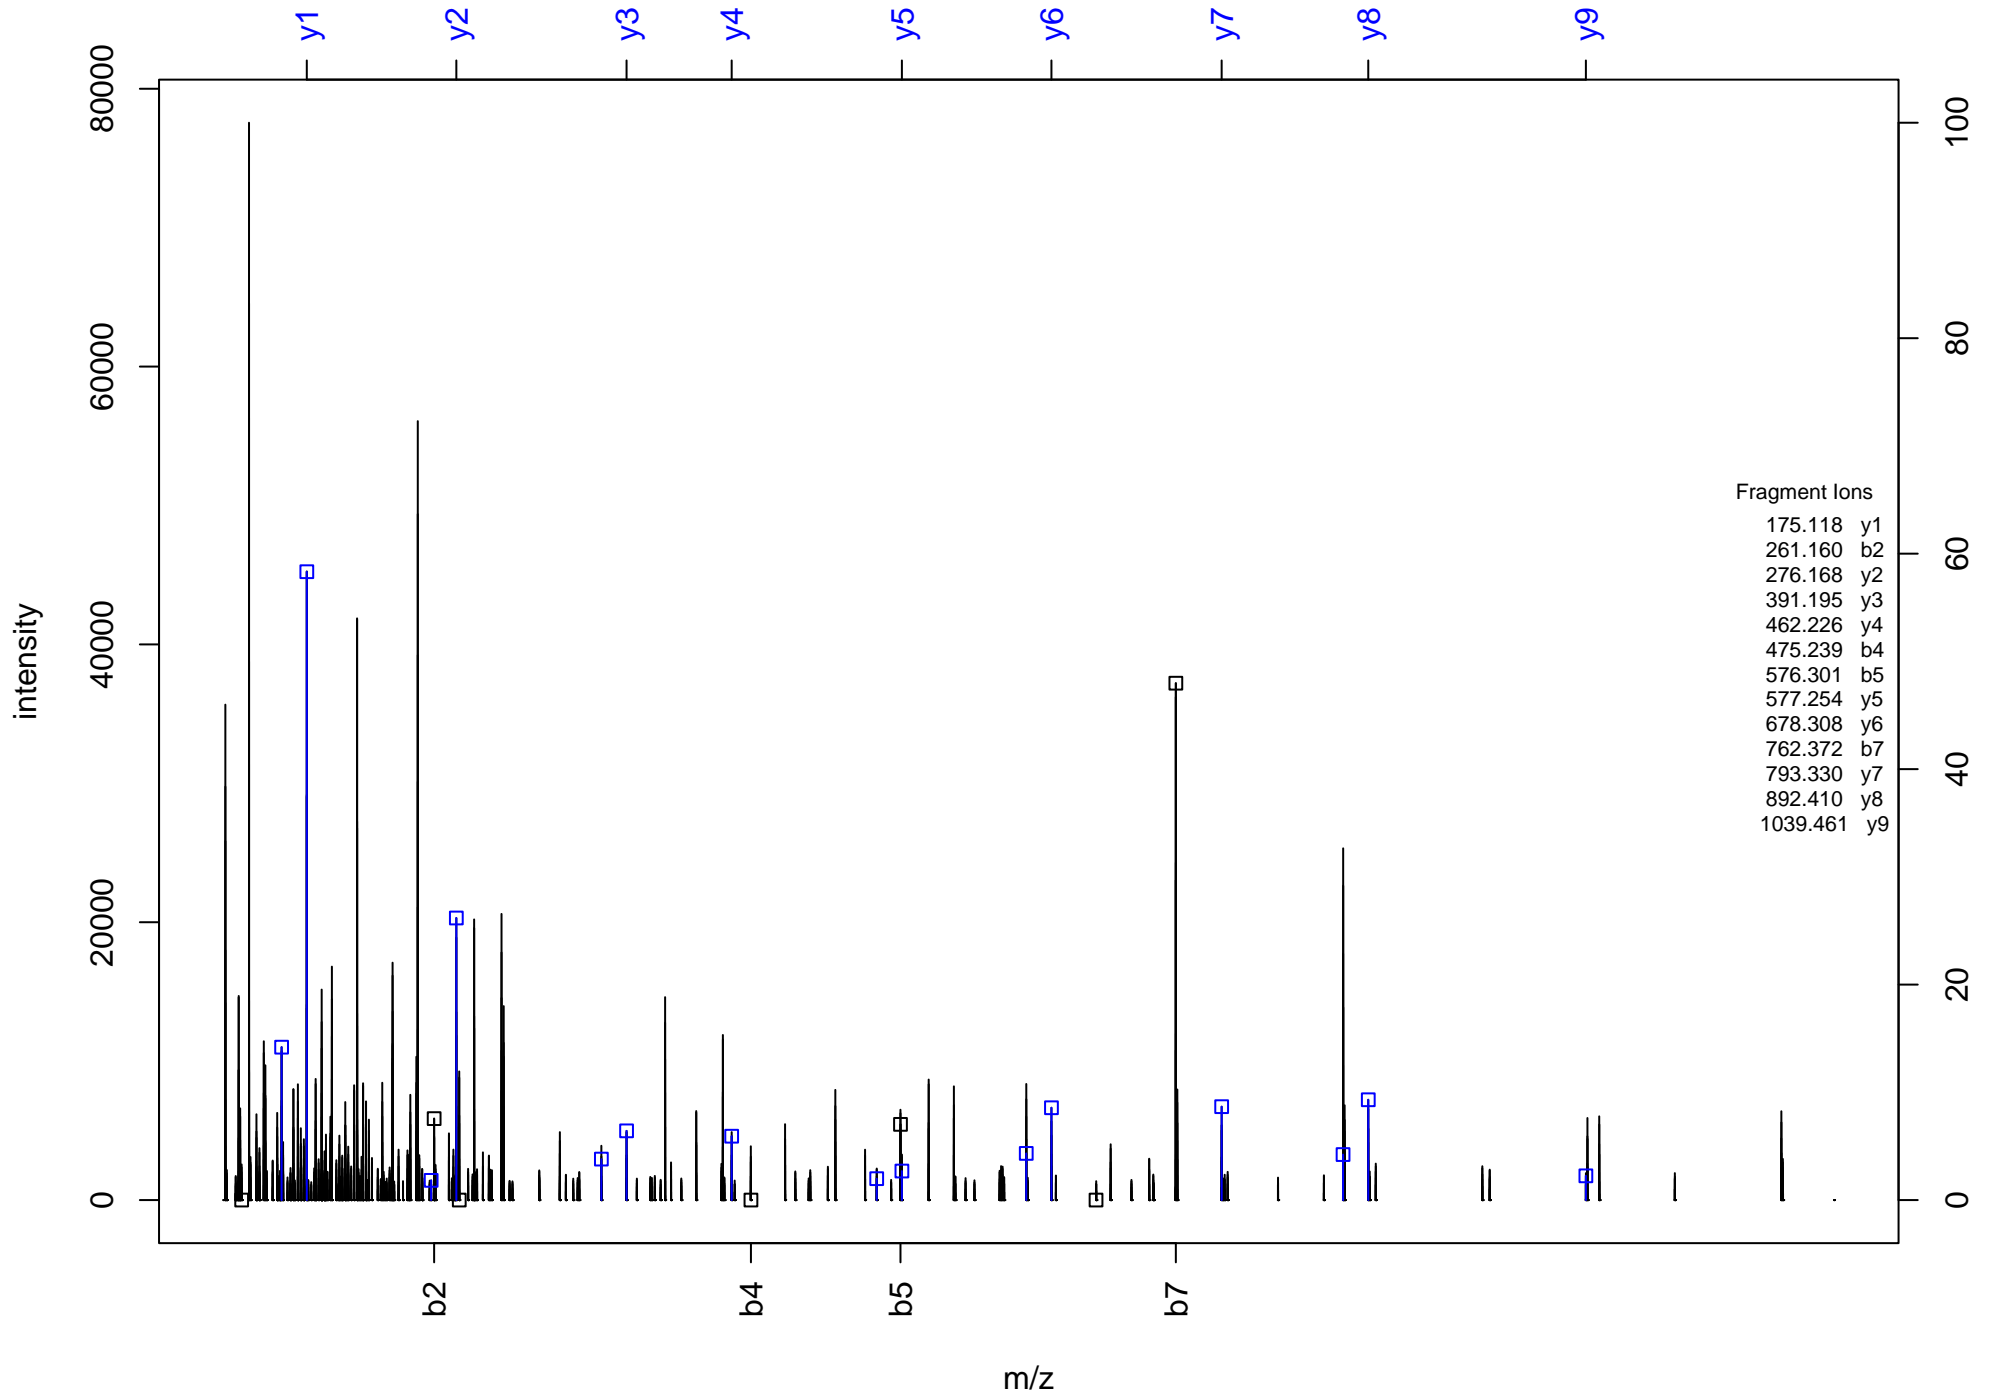

# SDAN^N^FLILFR

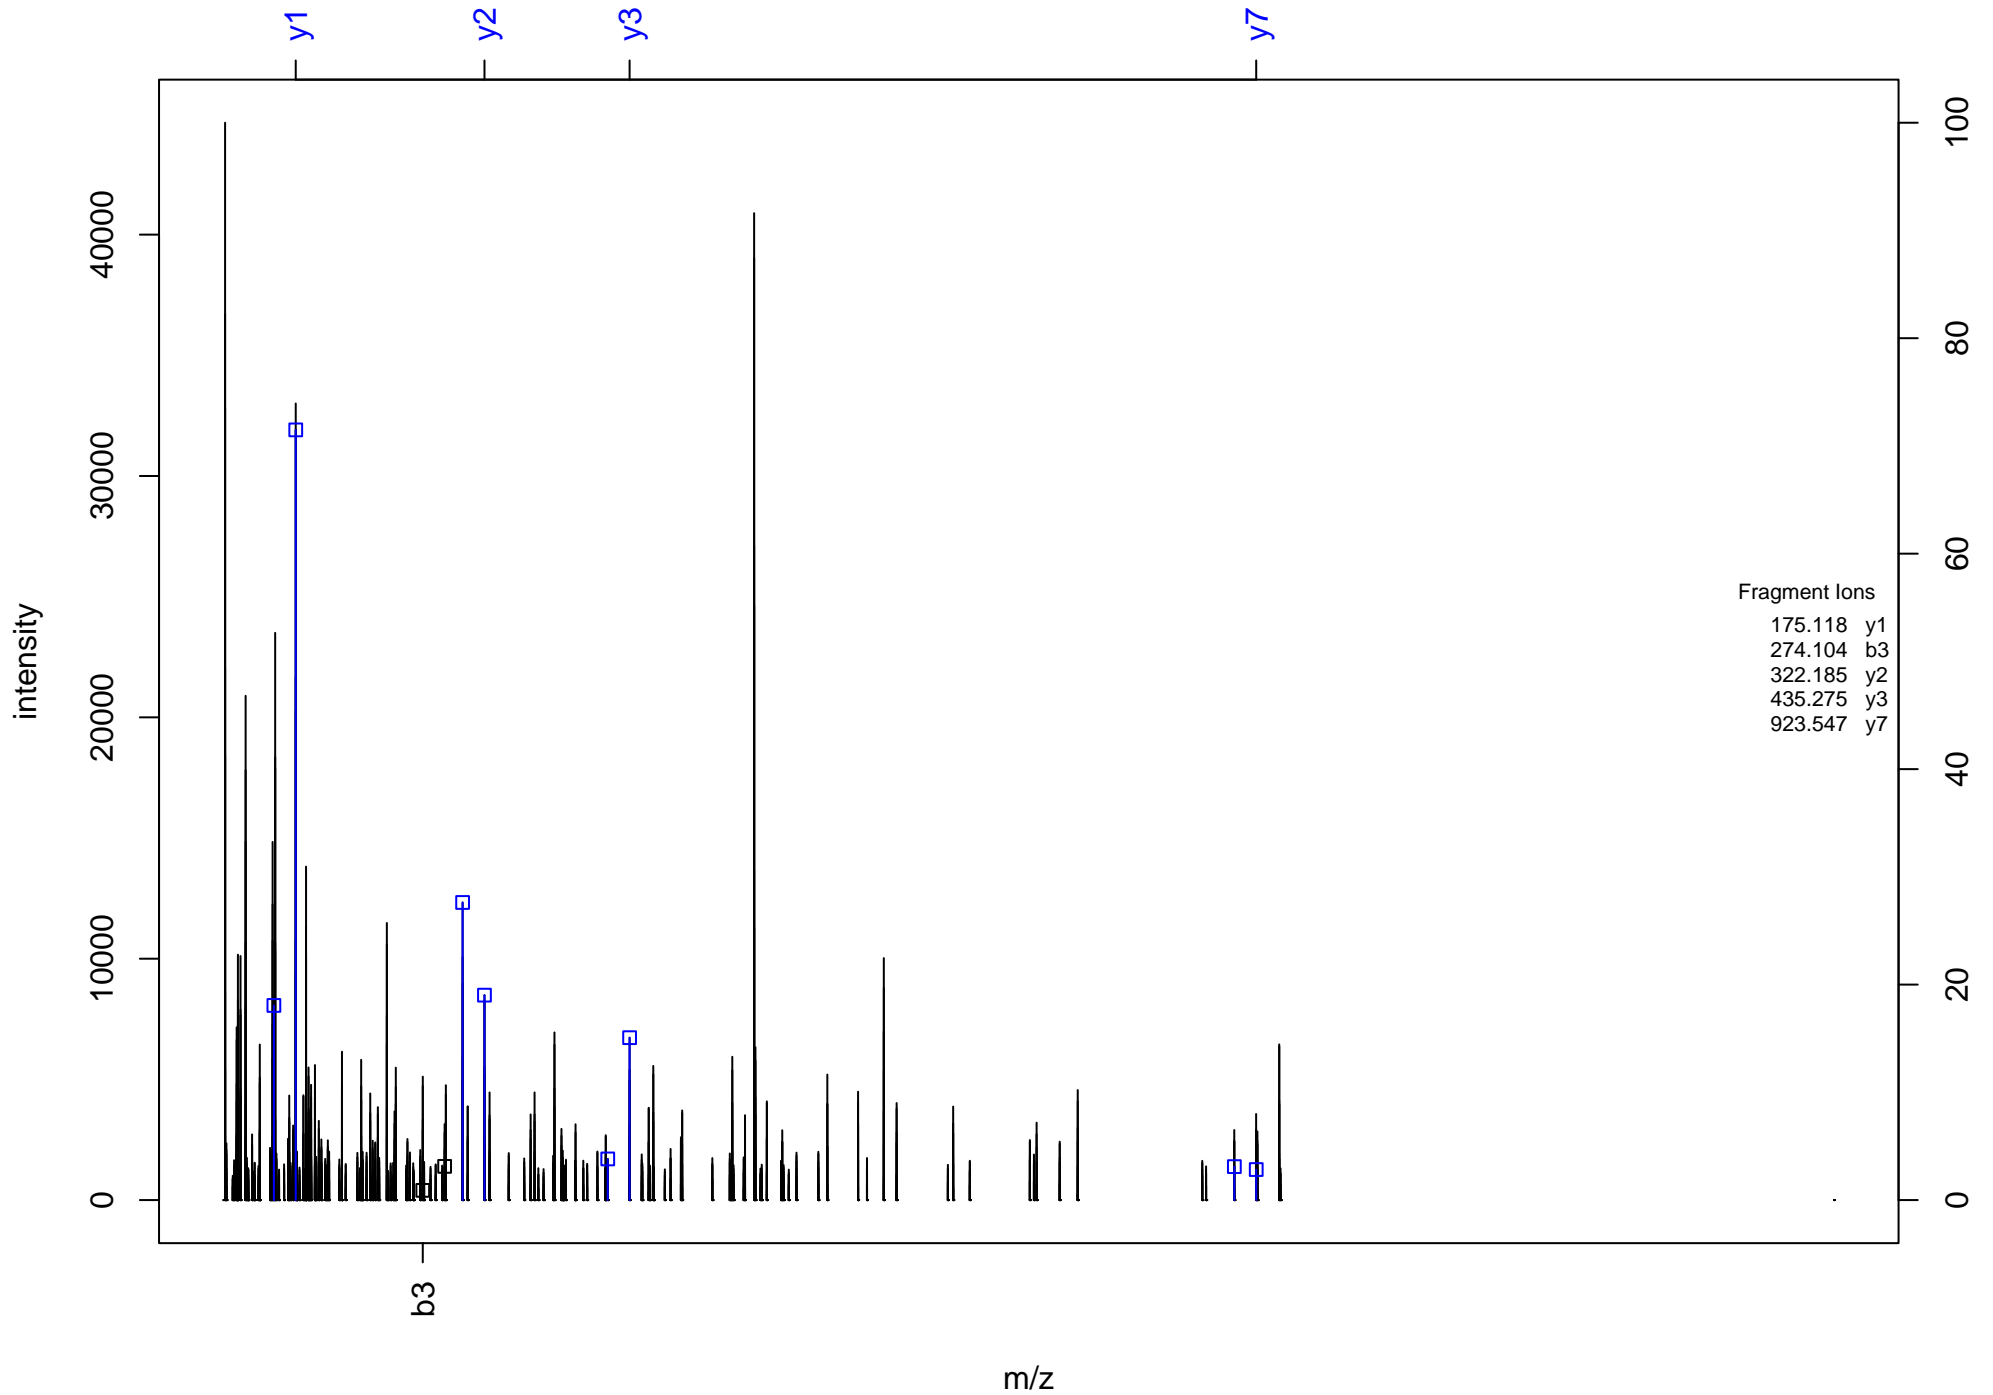

# YFVGYLGER

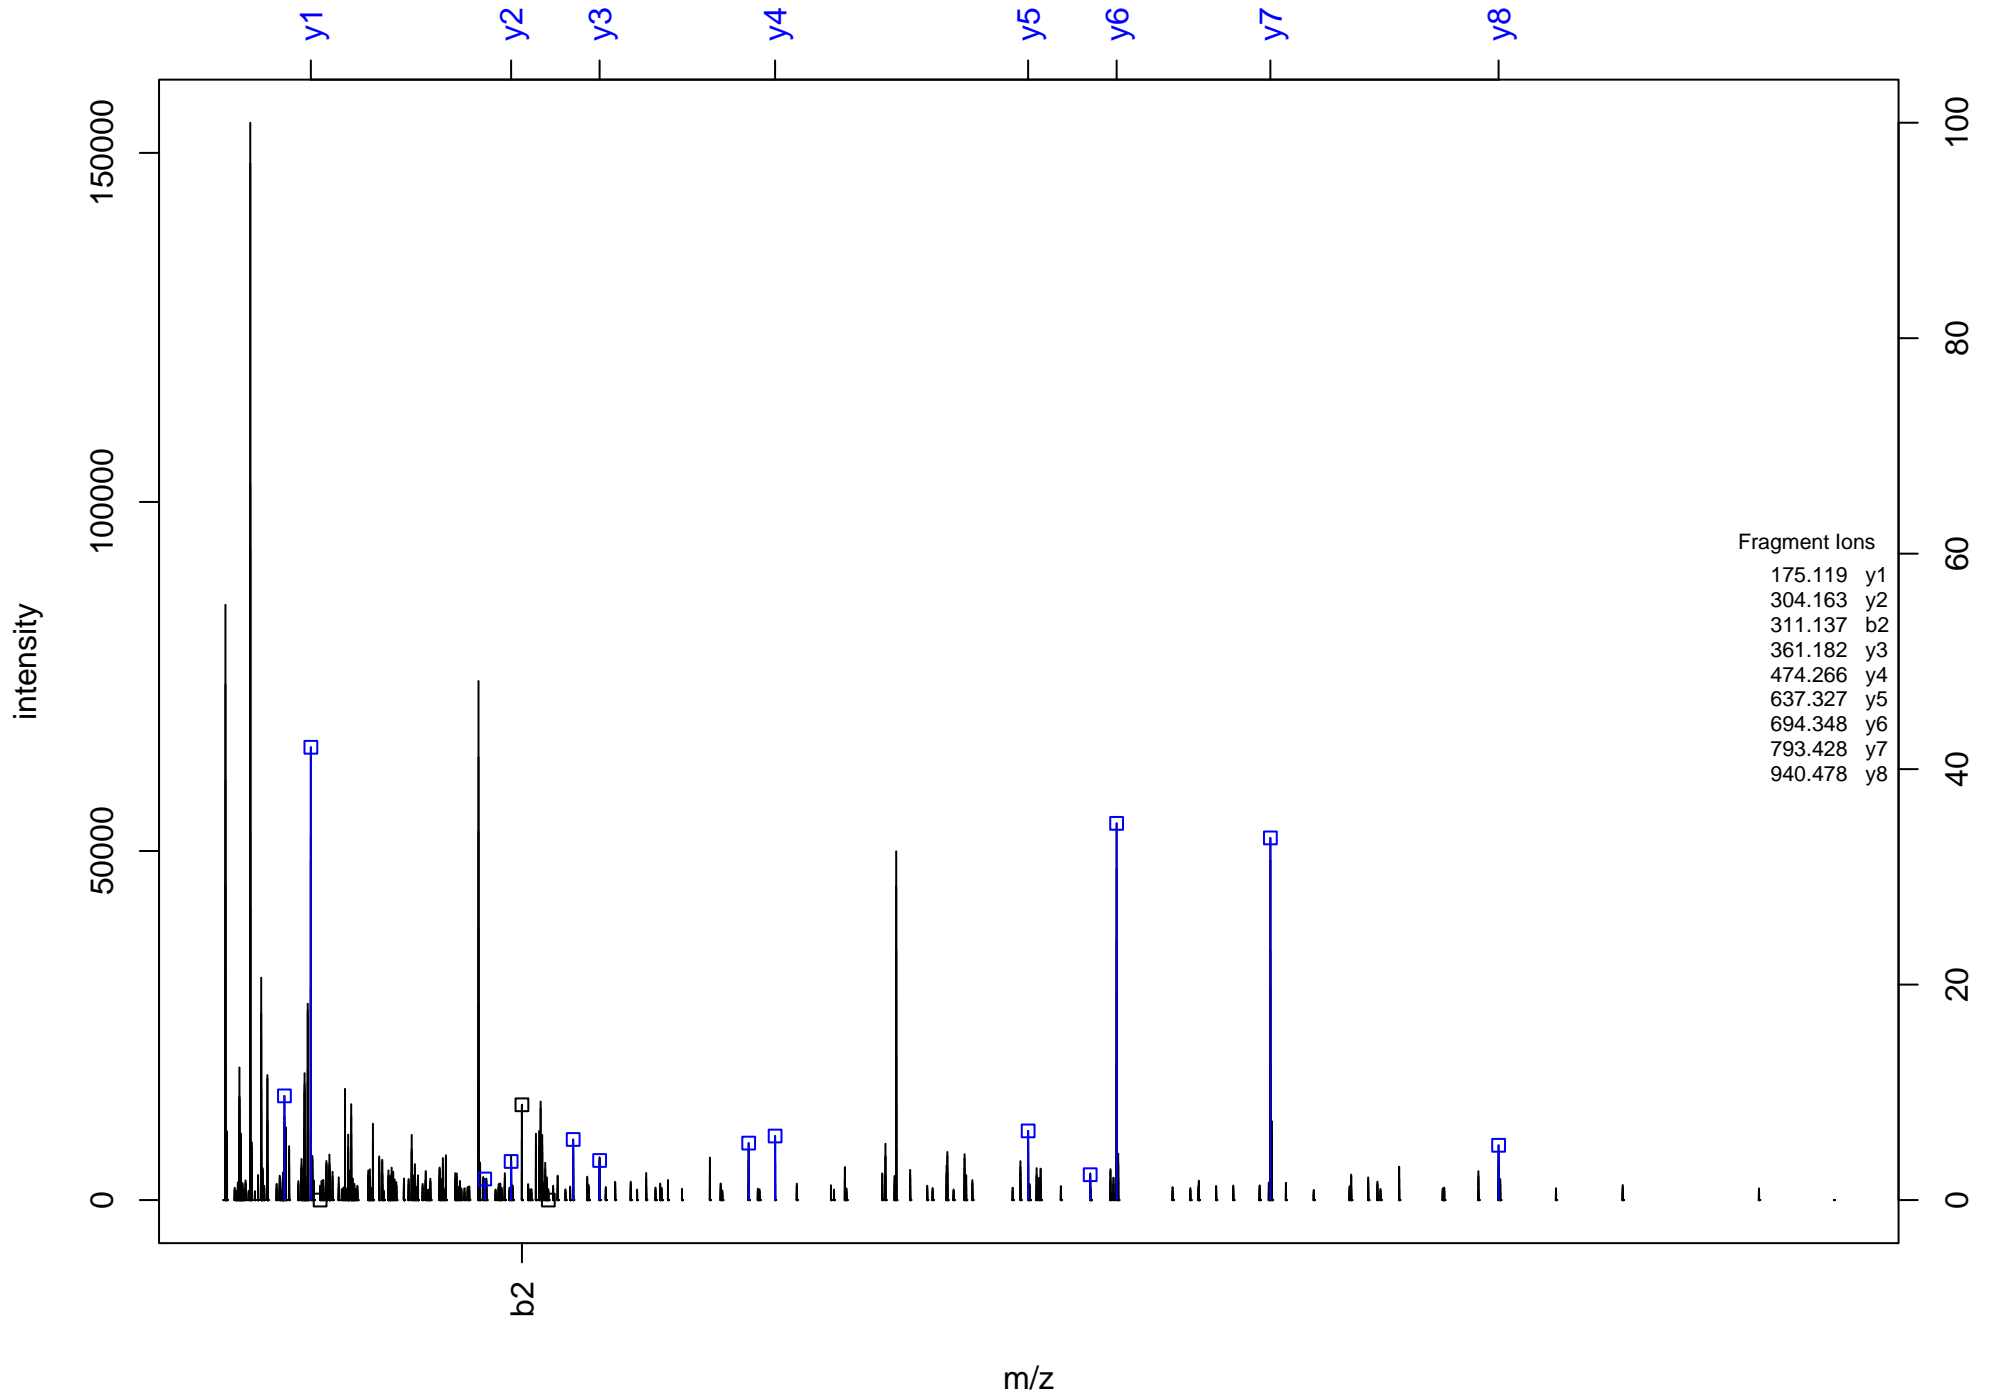



# AANPGCFLEDFVR

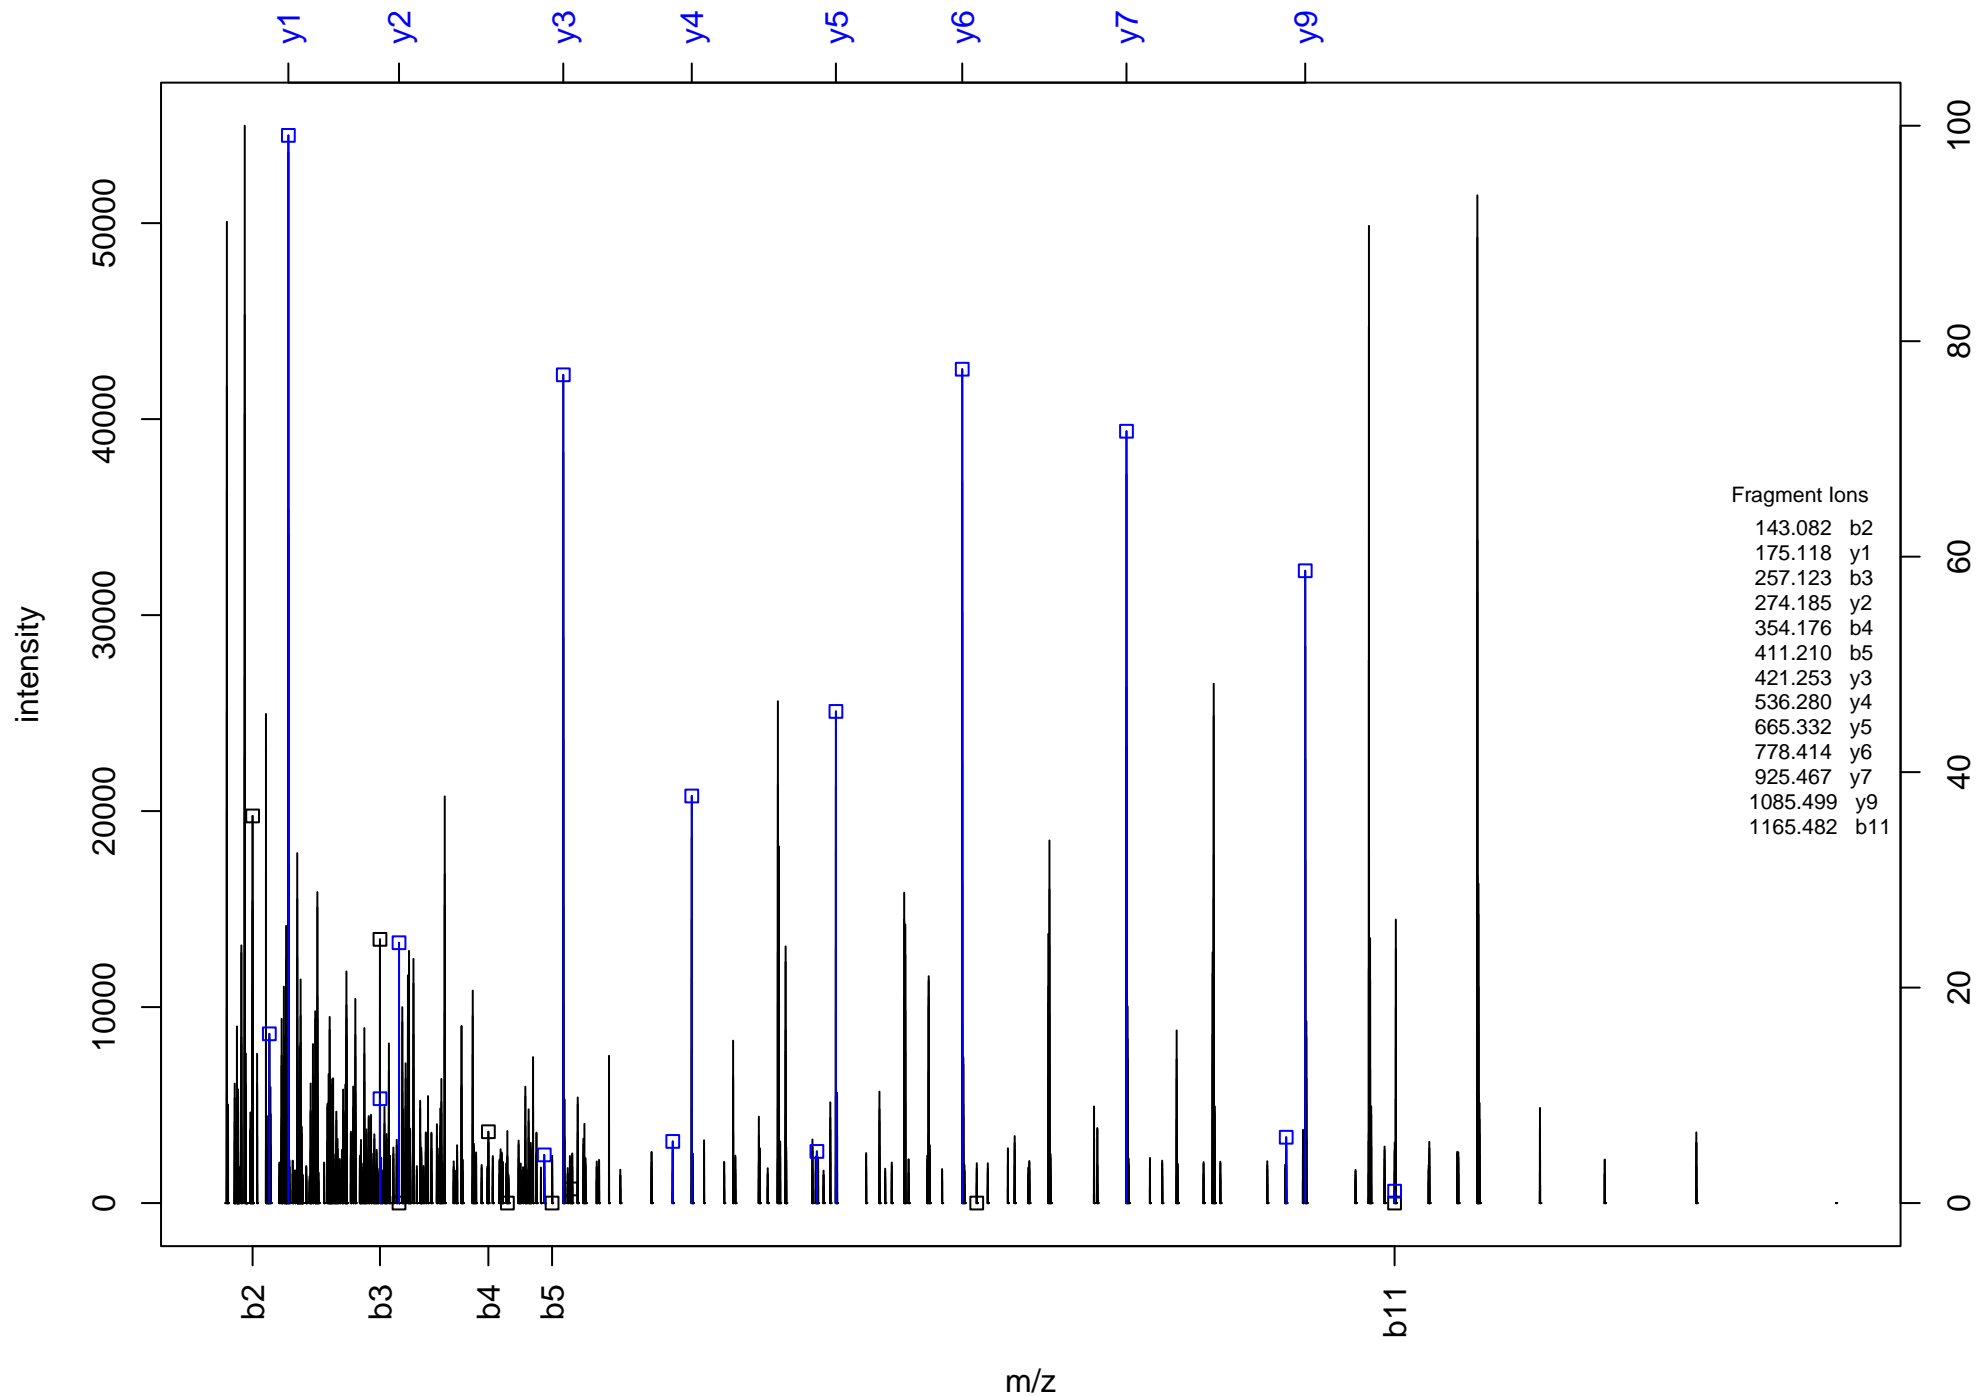

# VVN^SN^KEKLIK

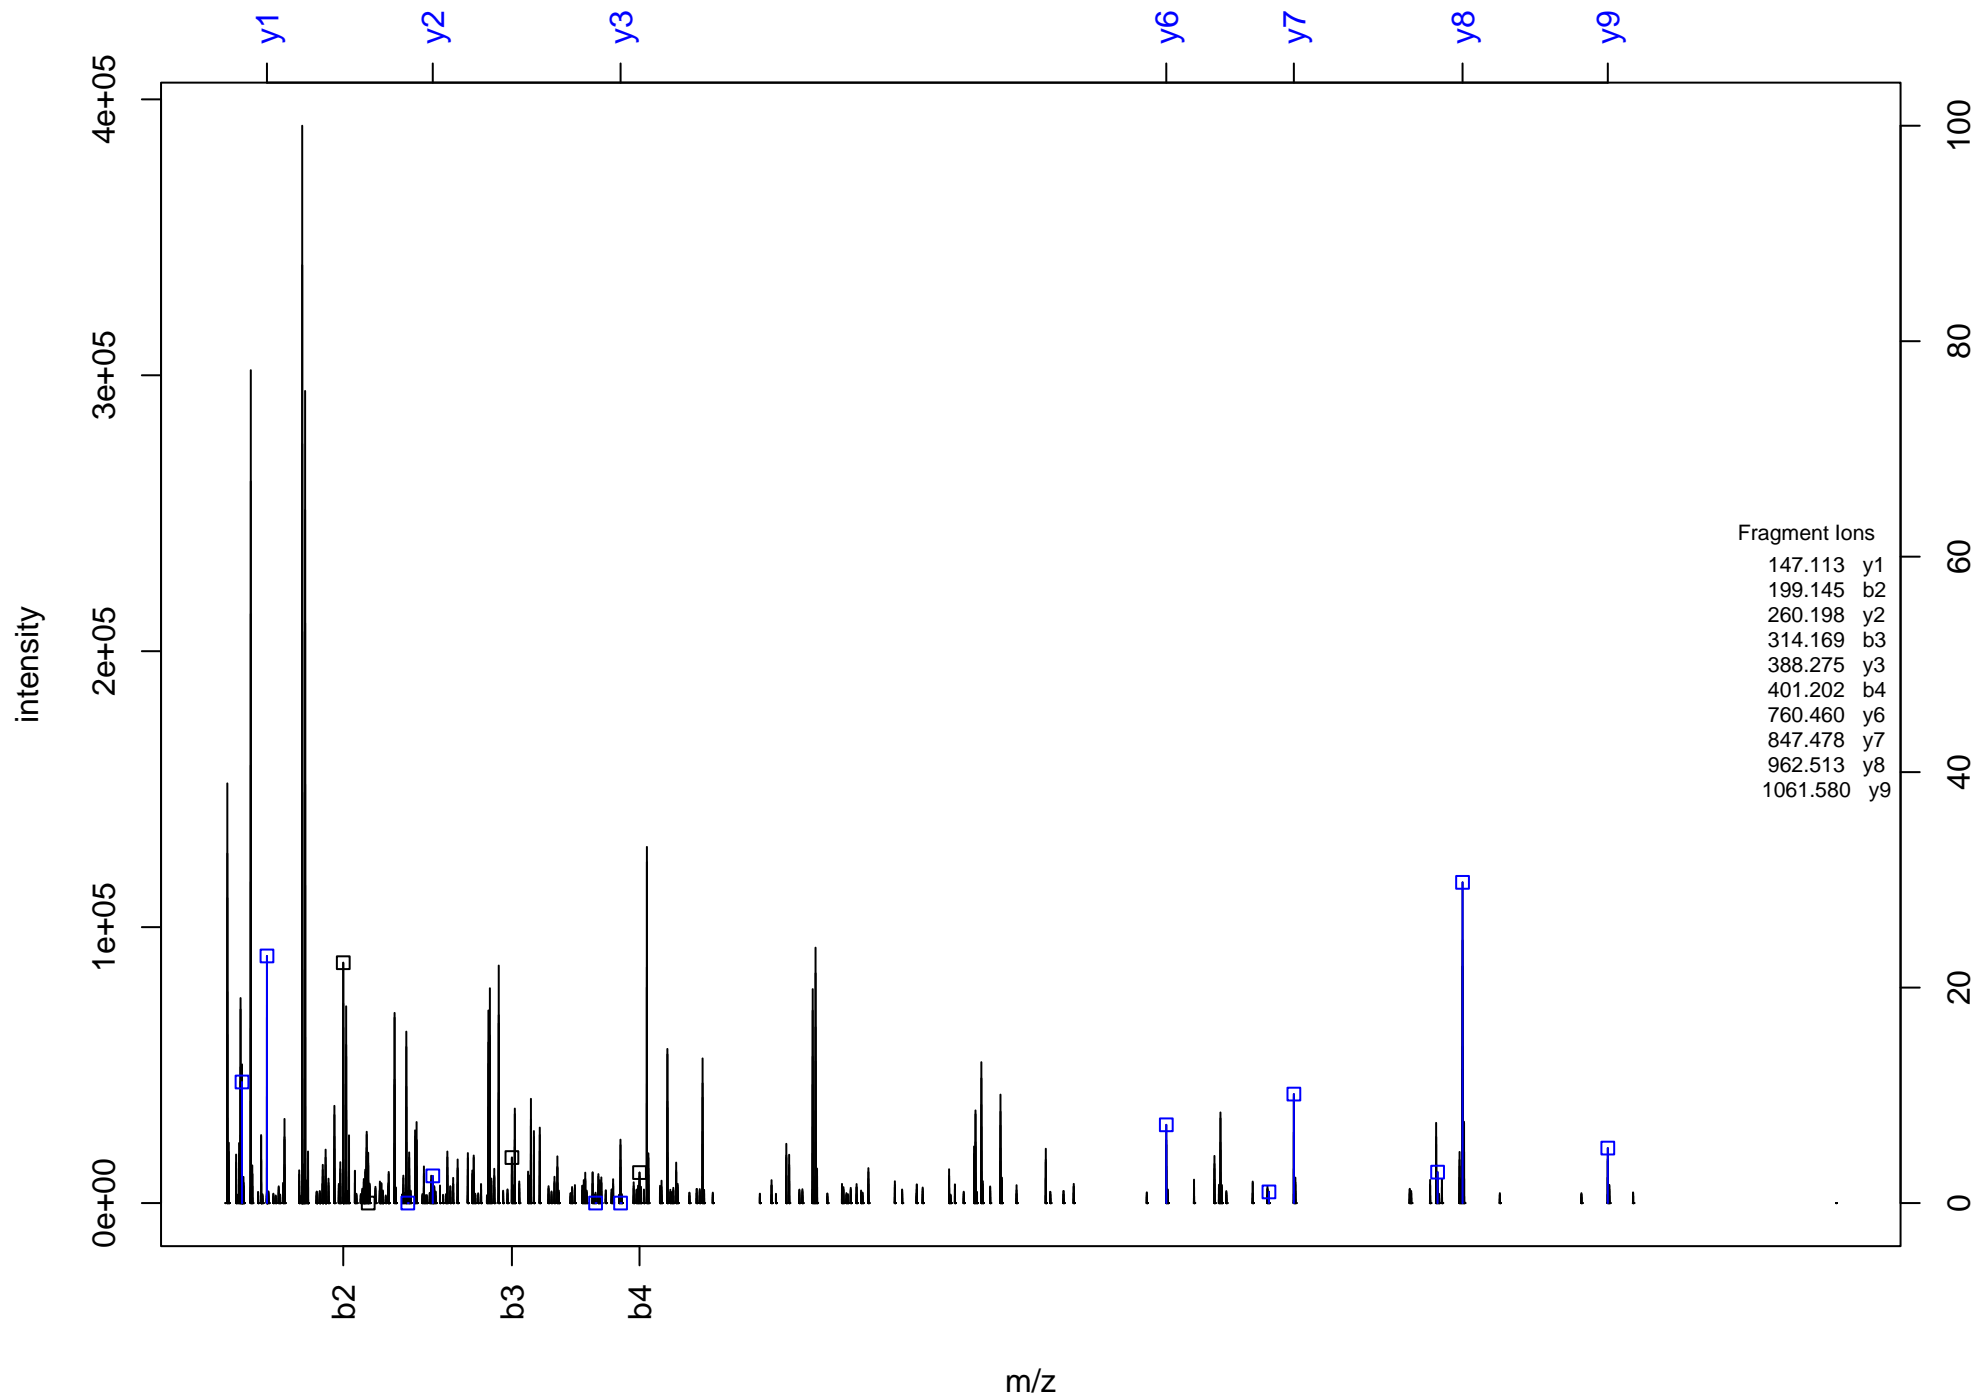

# APETEAPASQAGTDEPEPEGTAVQVQENQDTRPK

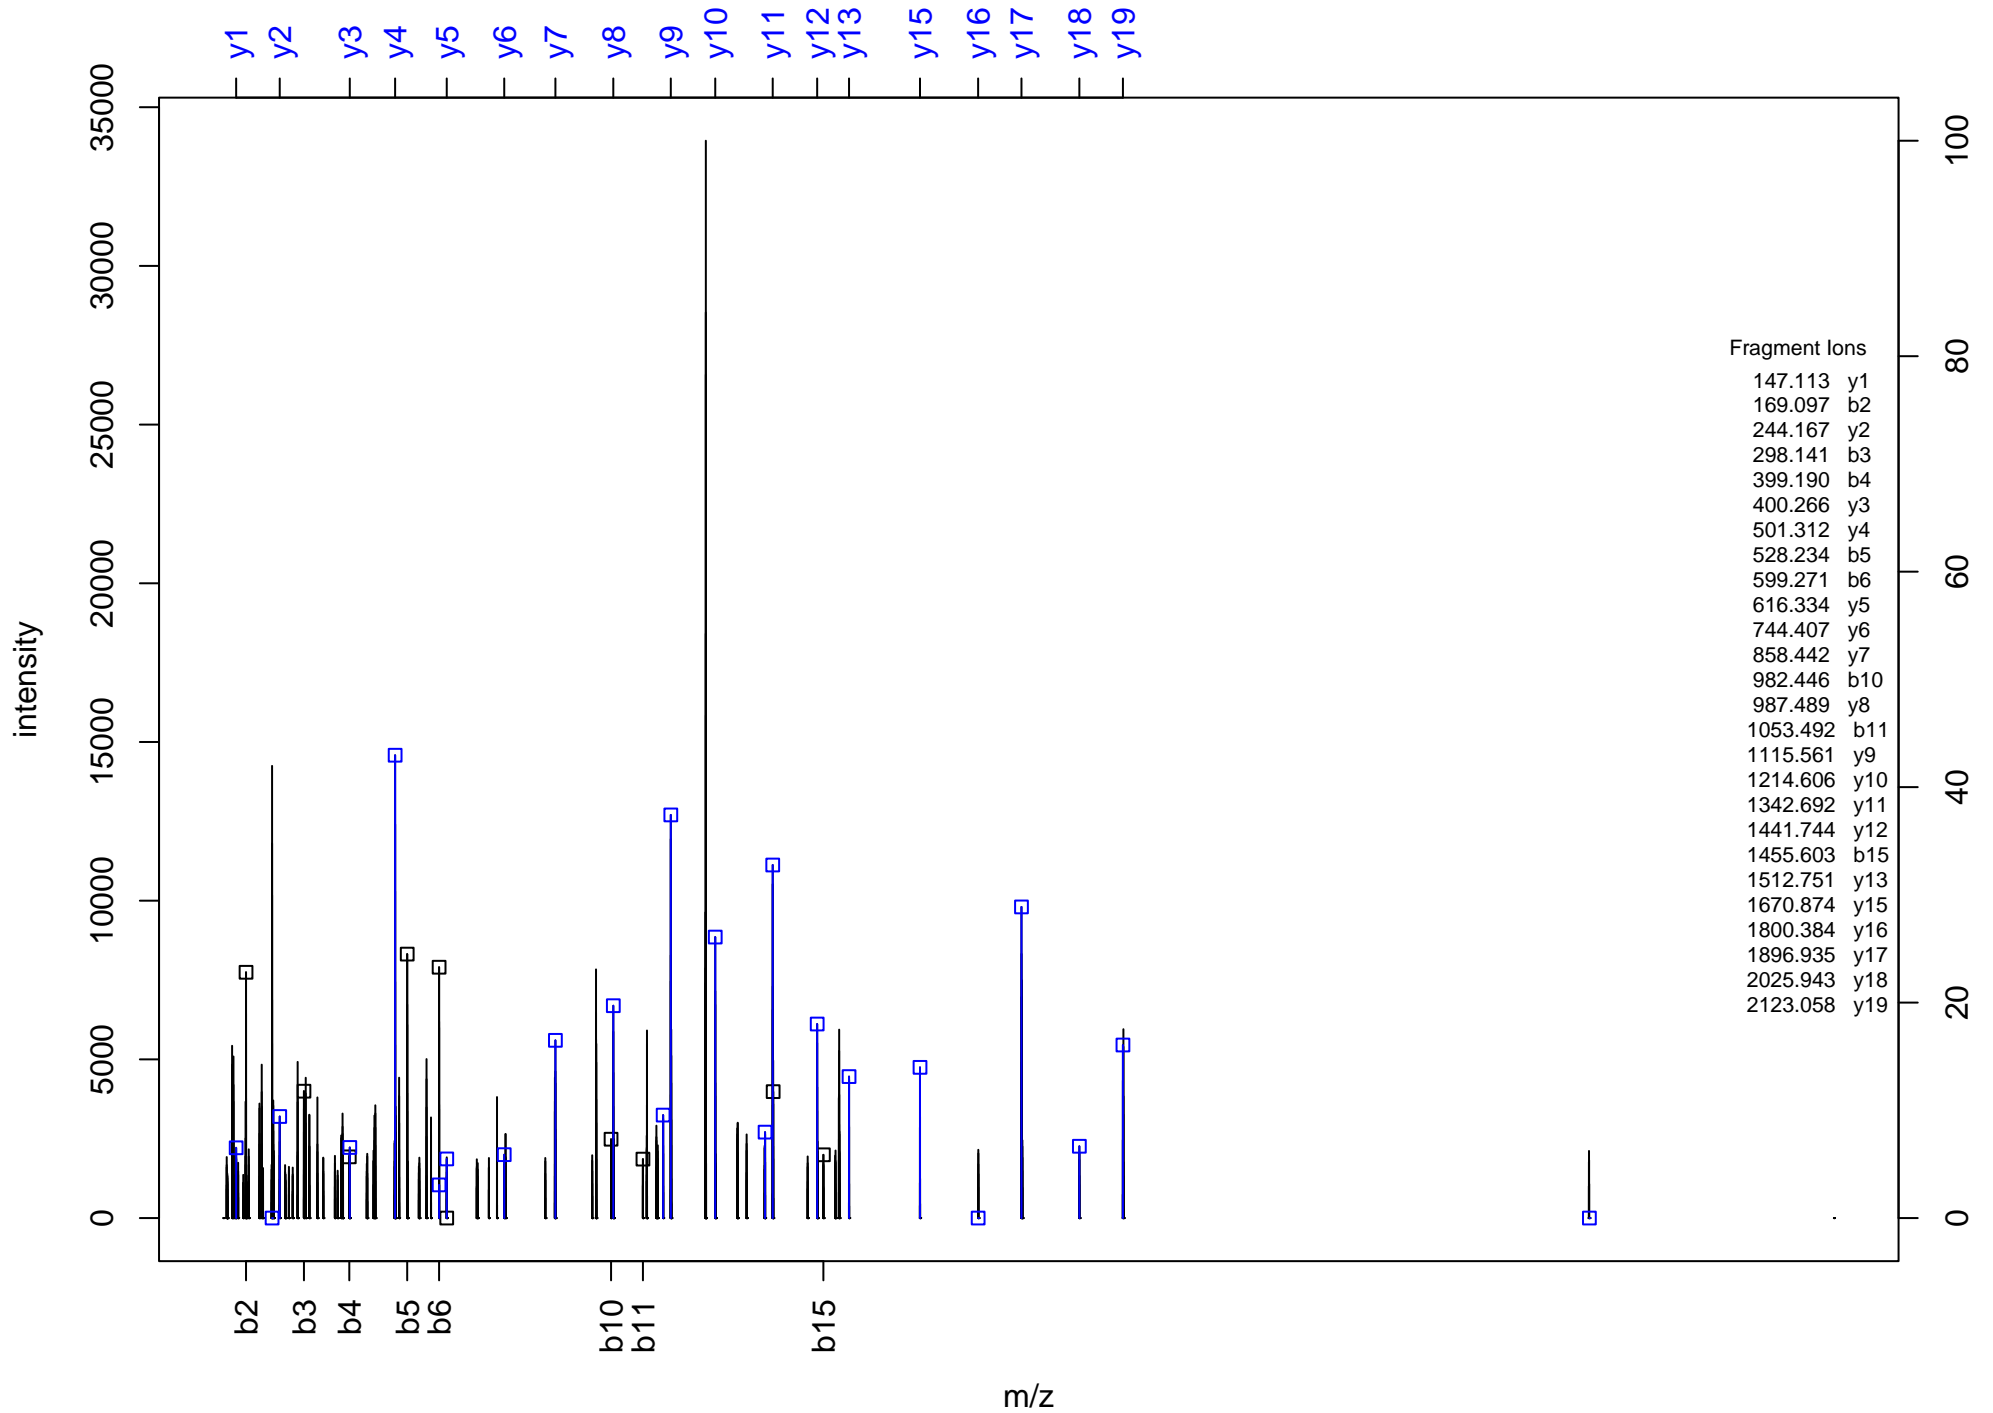

# TEGLDYDTFPEVPATPGER

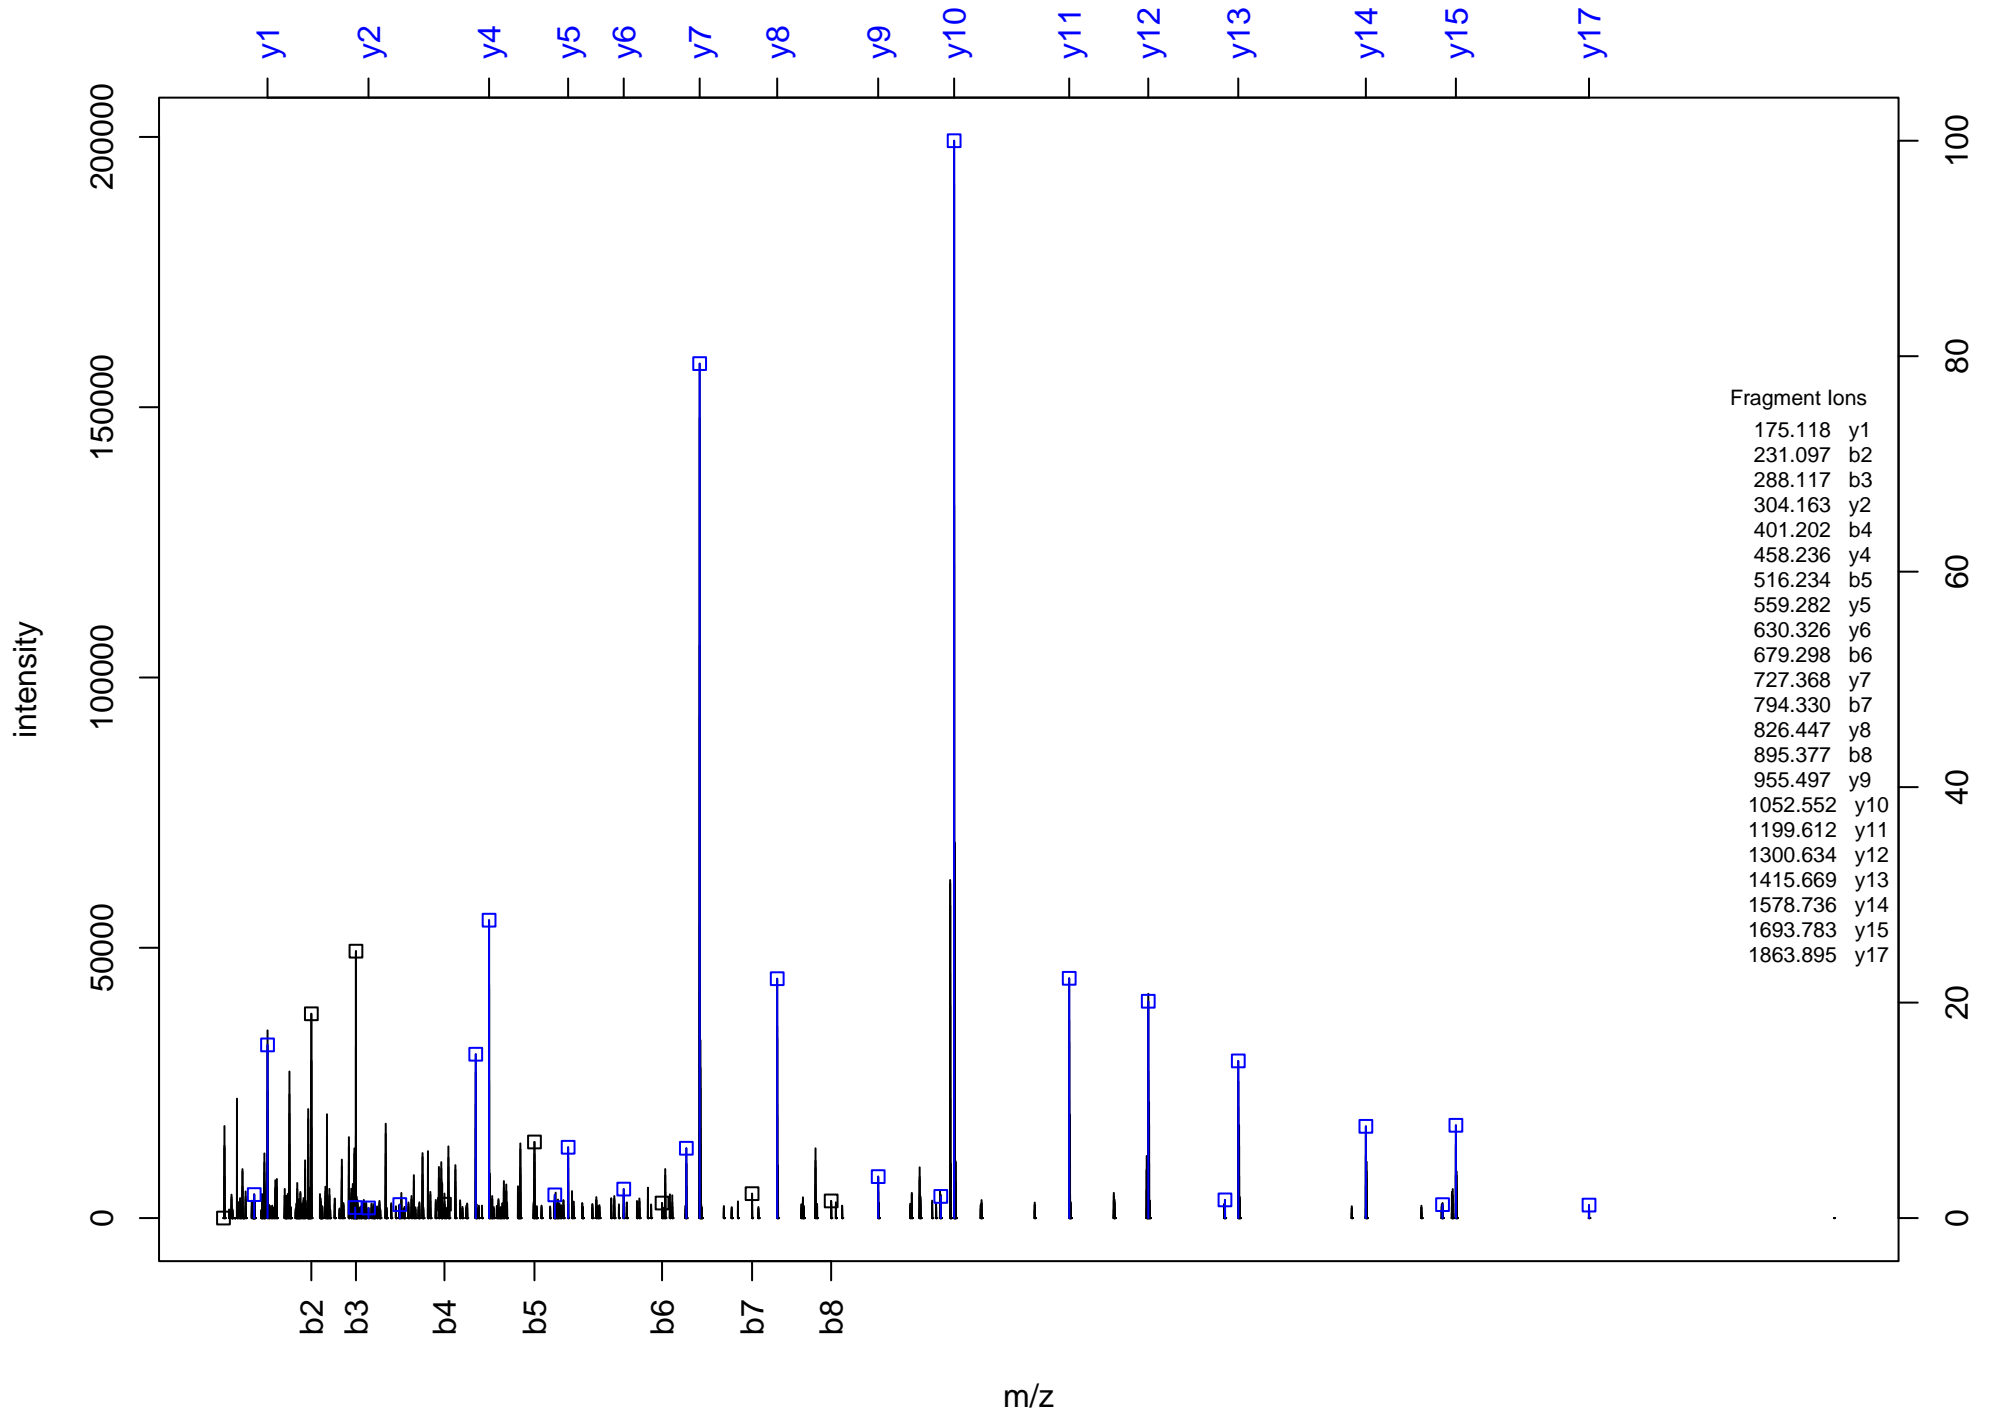

# LFCPEHSPEQEEATESADDPSMK

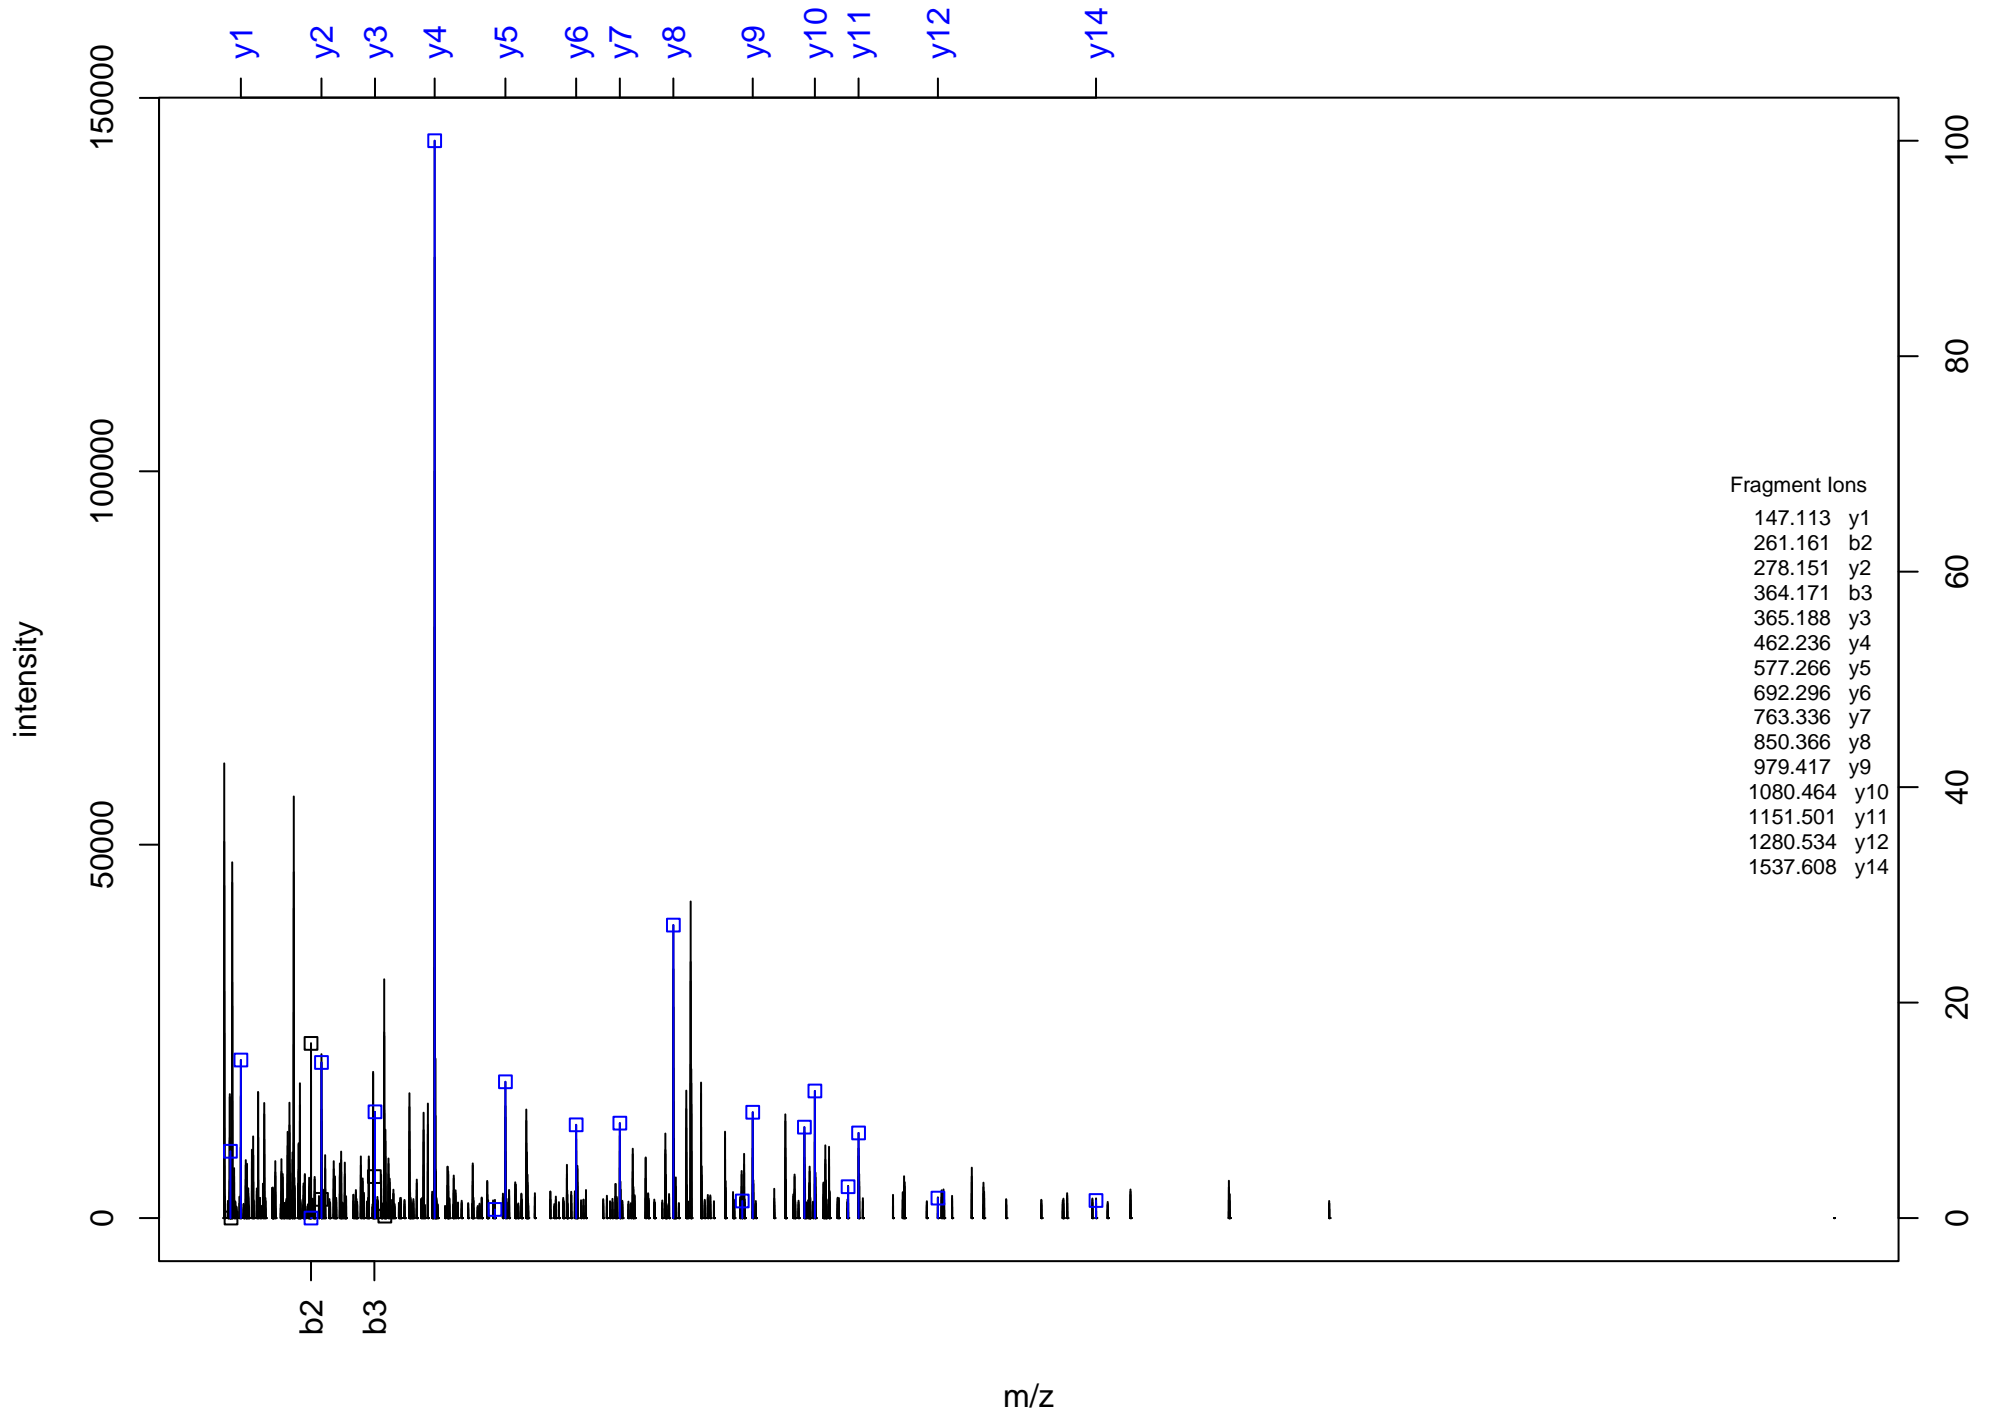

# LDCPVVGWQQELR

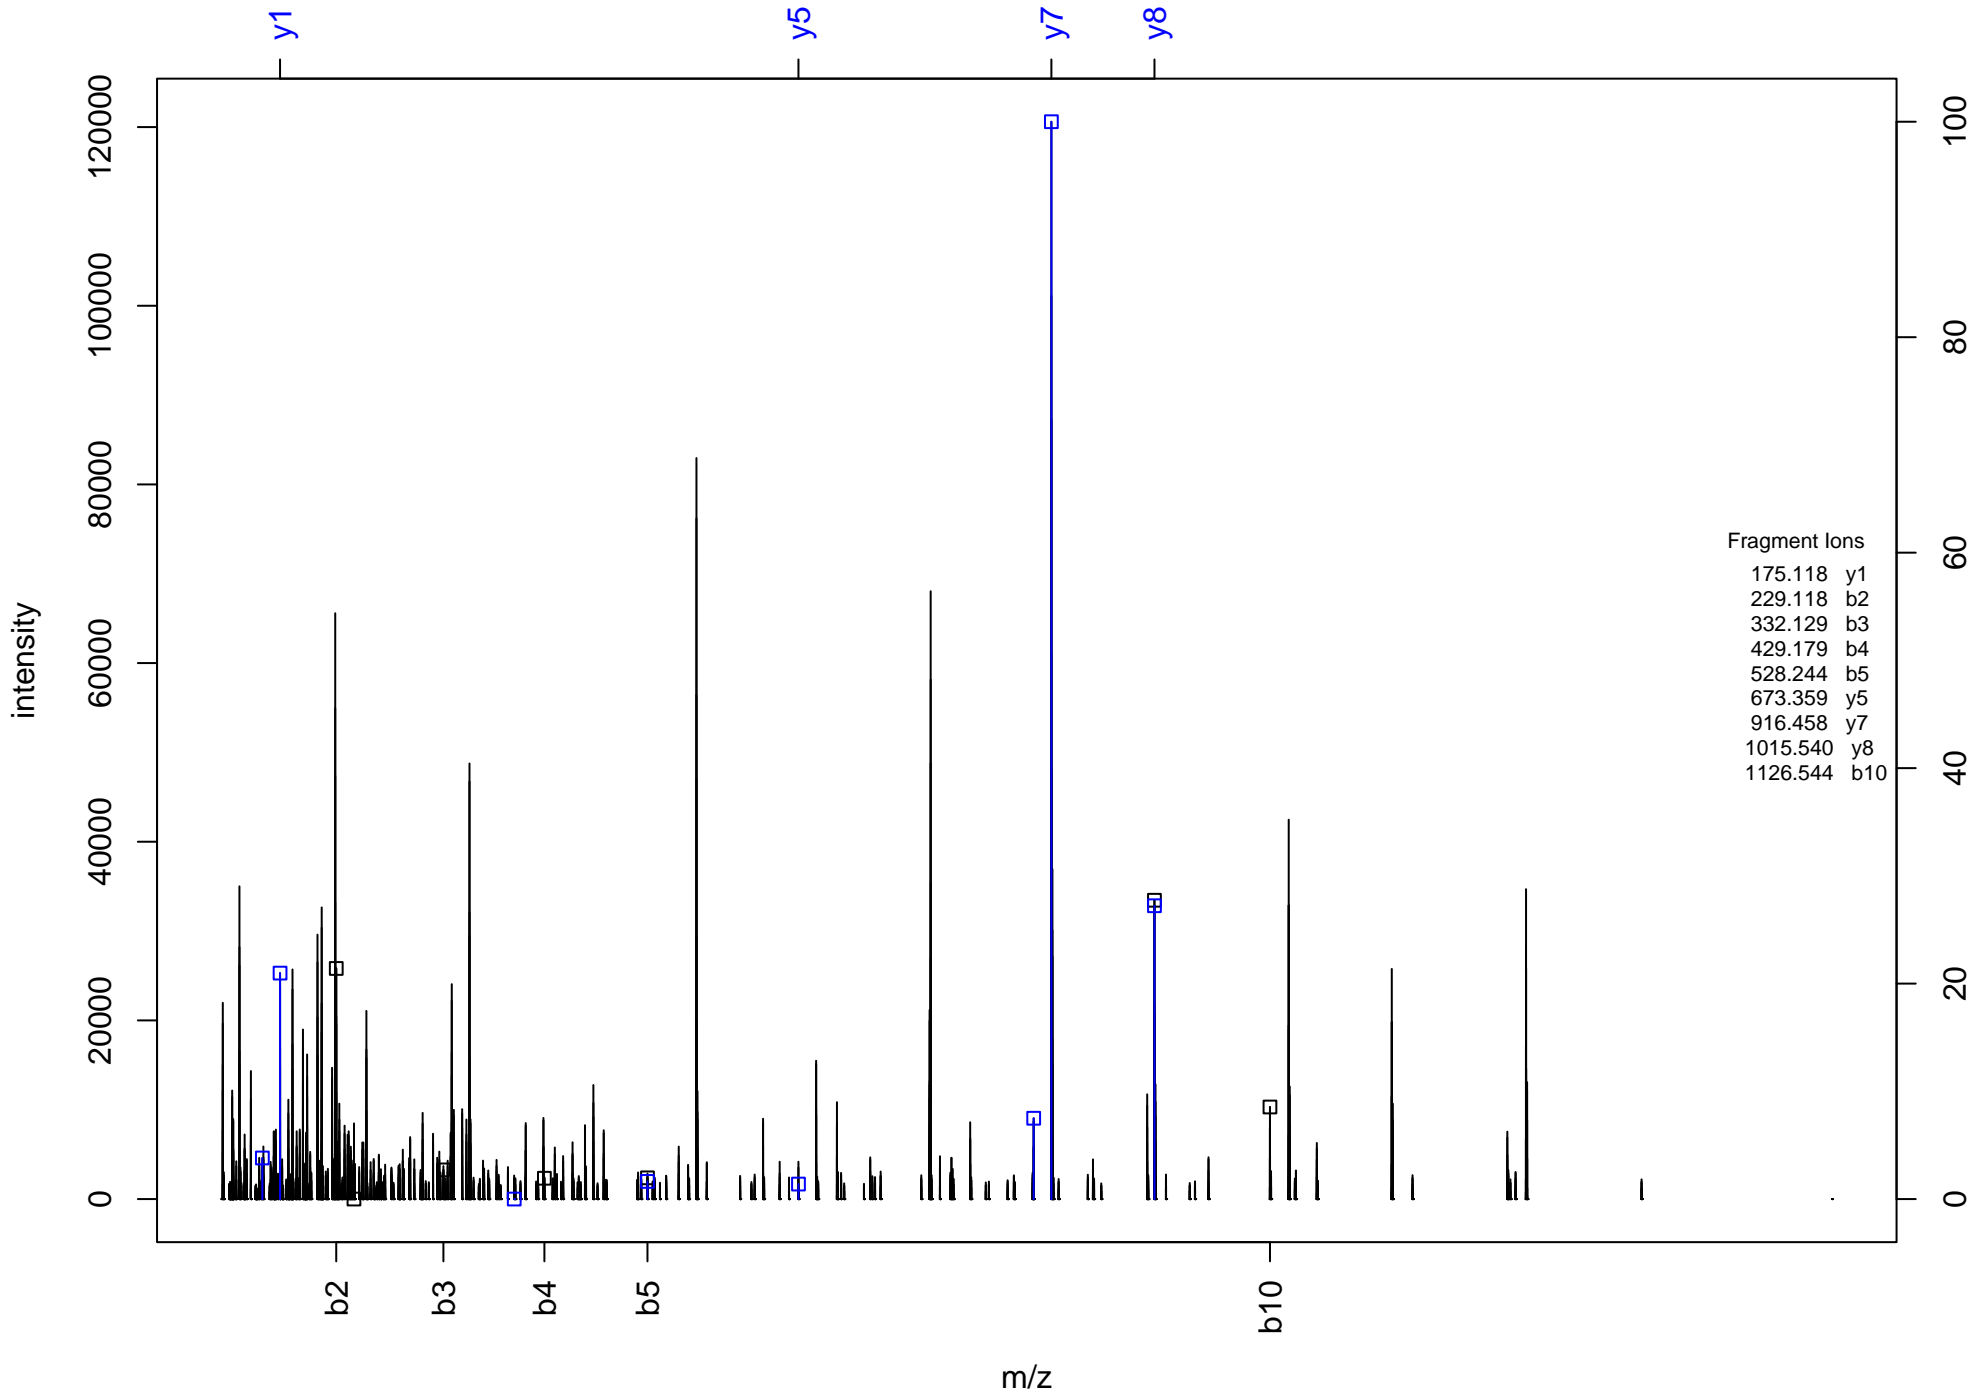

# VQ<sup>N</sup>WFQRRR

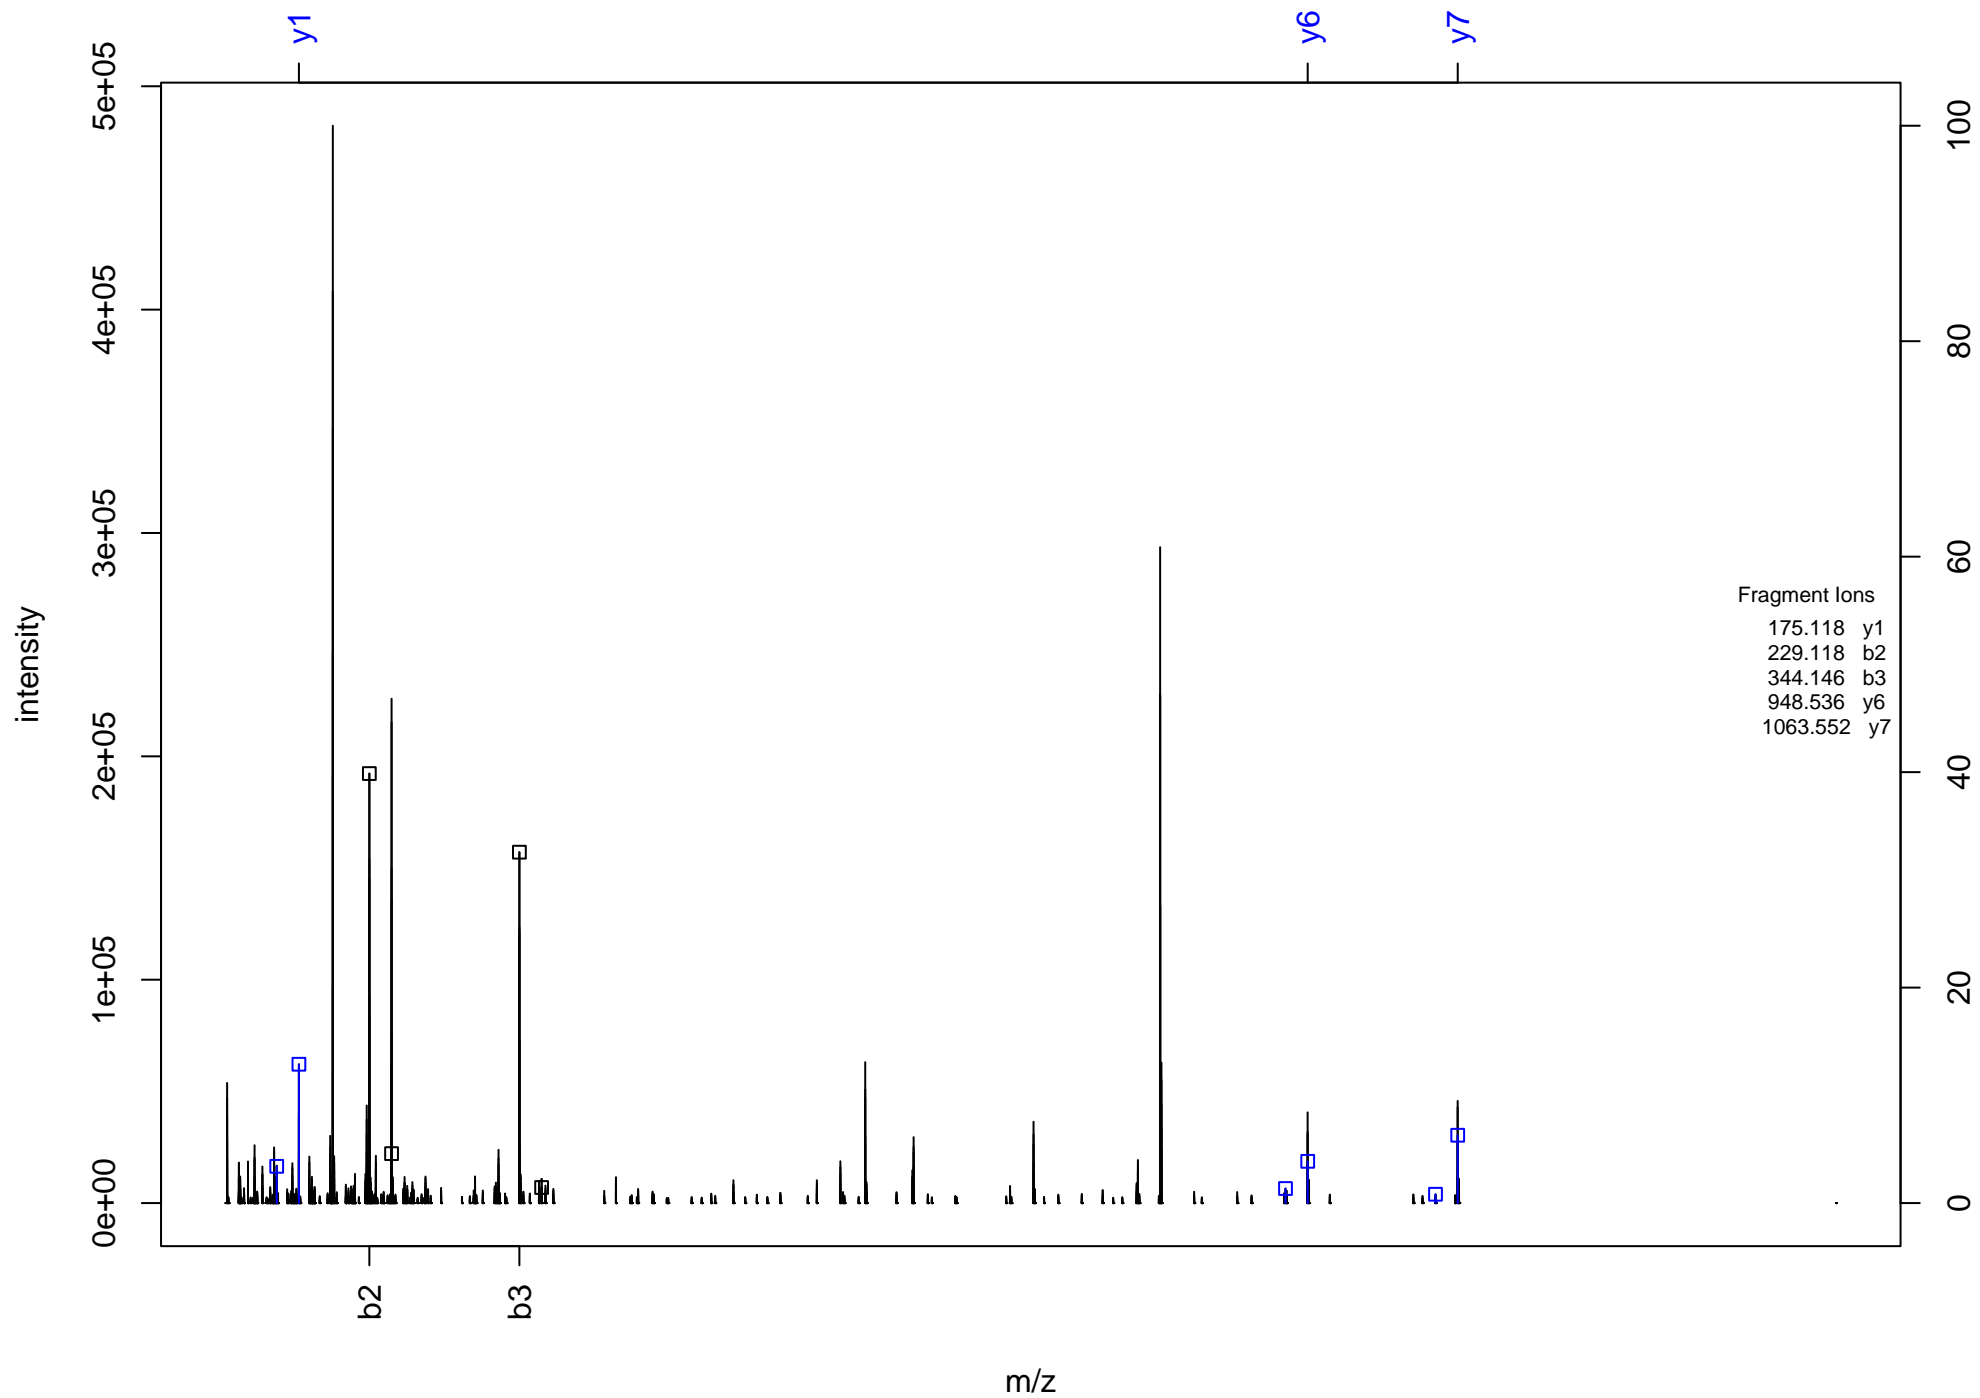

# DLPQ^PDSREN^R

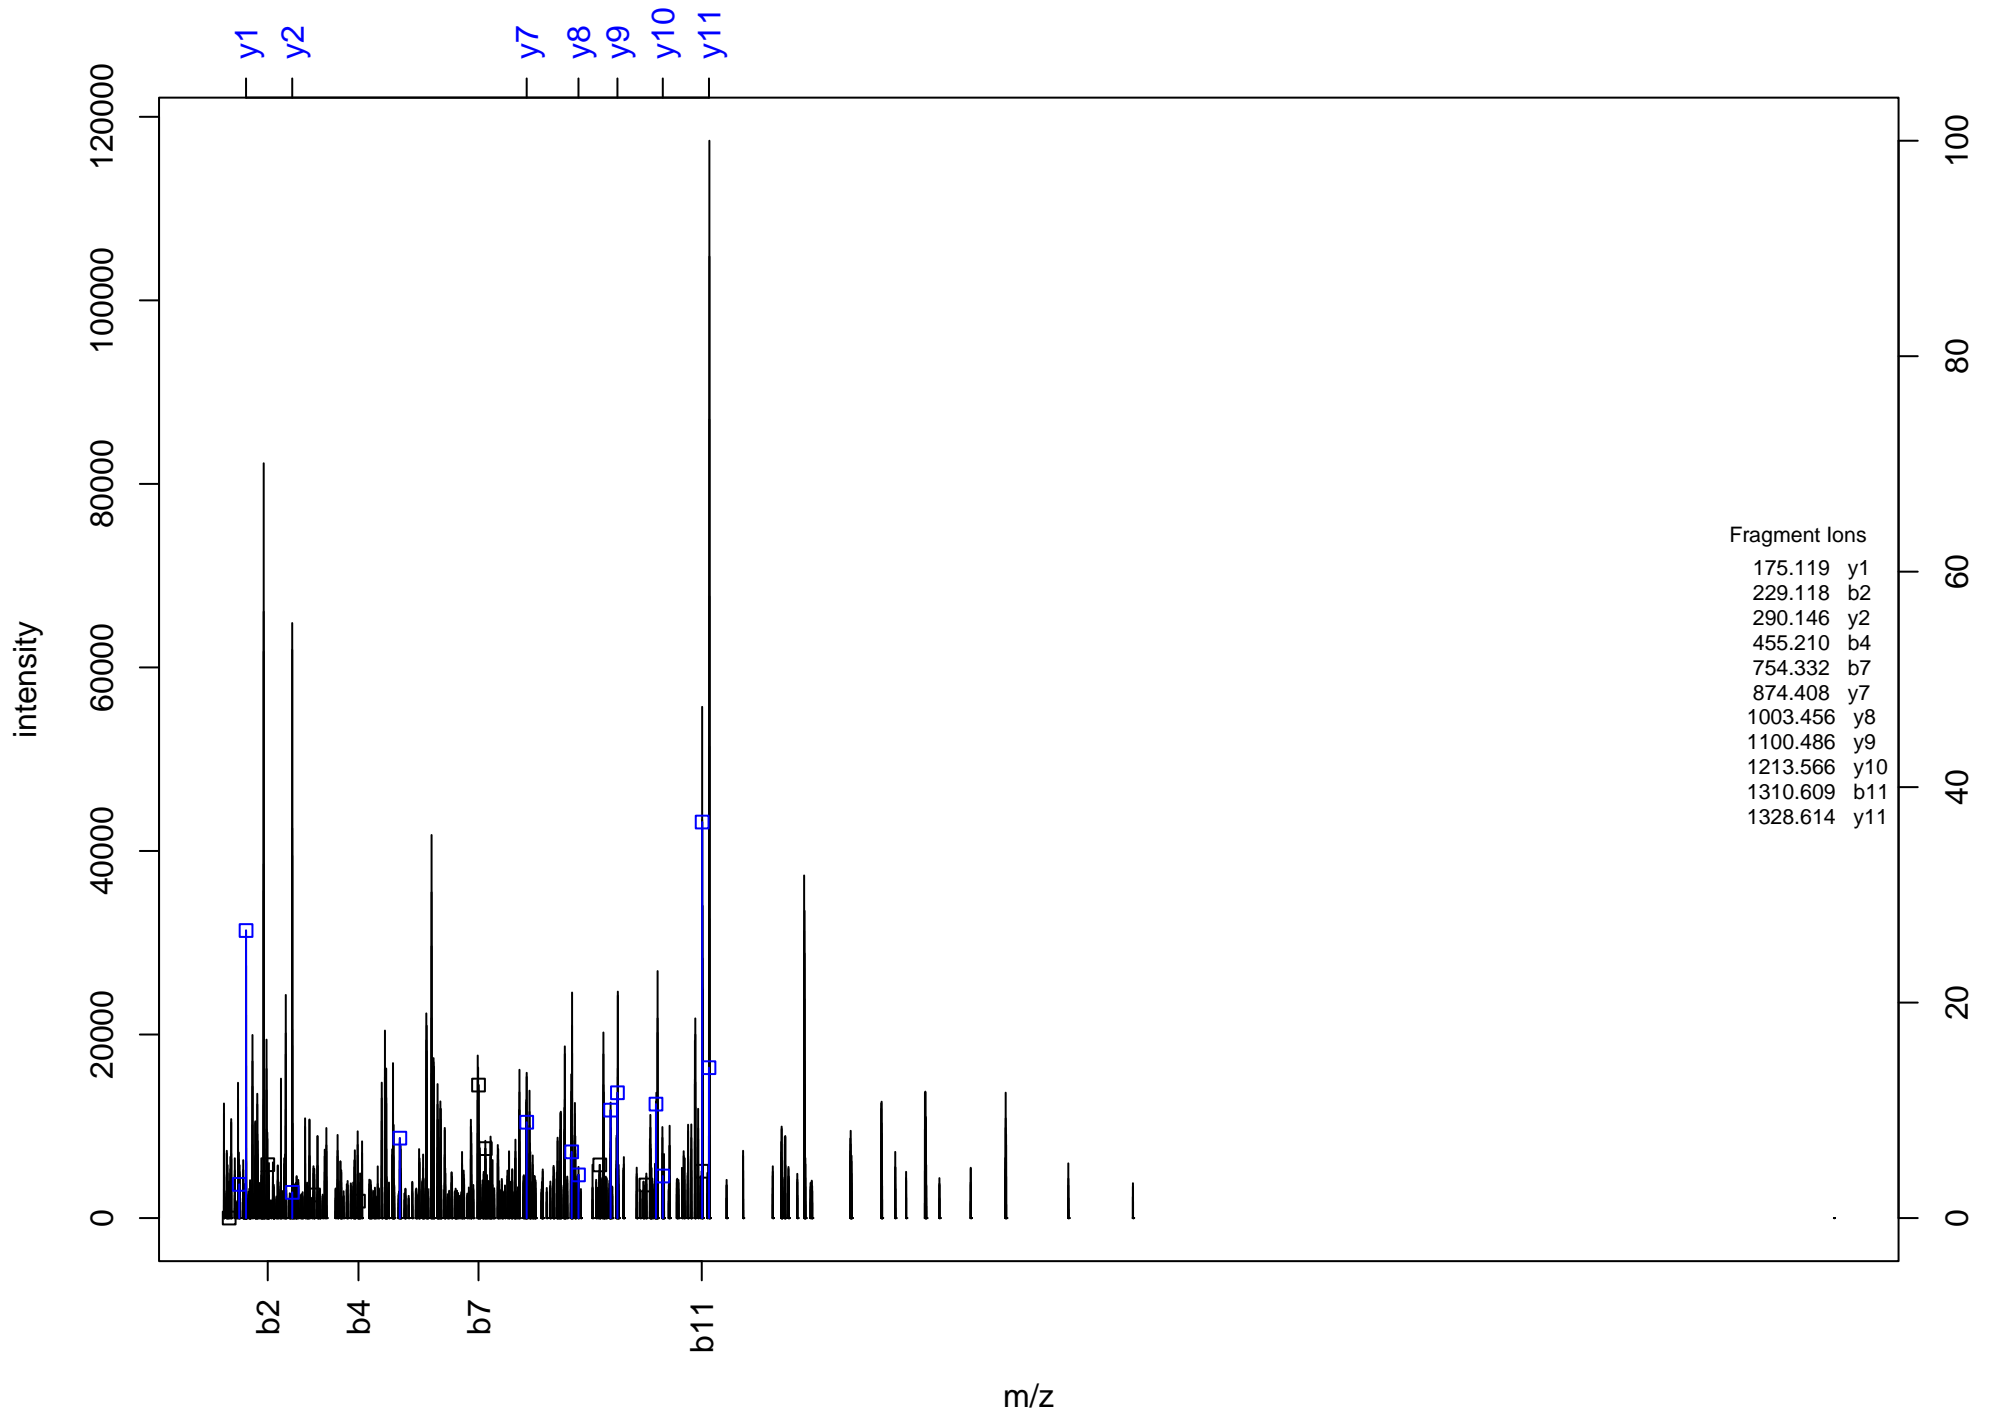



# KWENEEEEEEPPAP TSAEGEGNAEGPDAEAGSASTPR

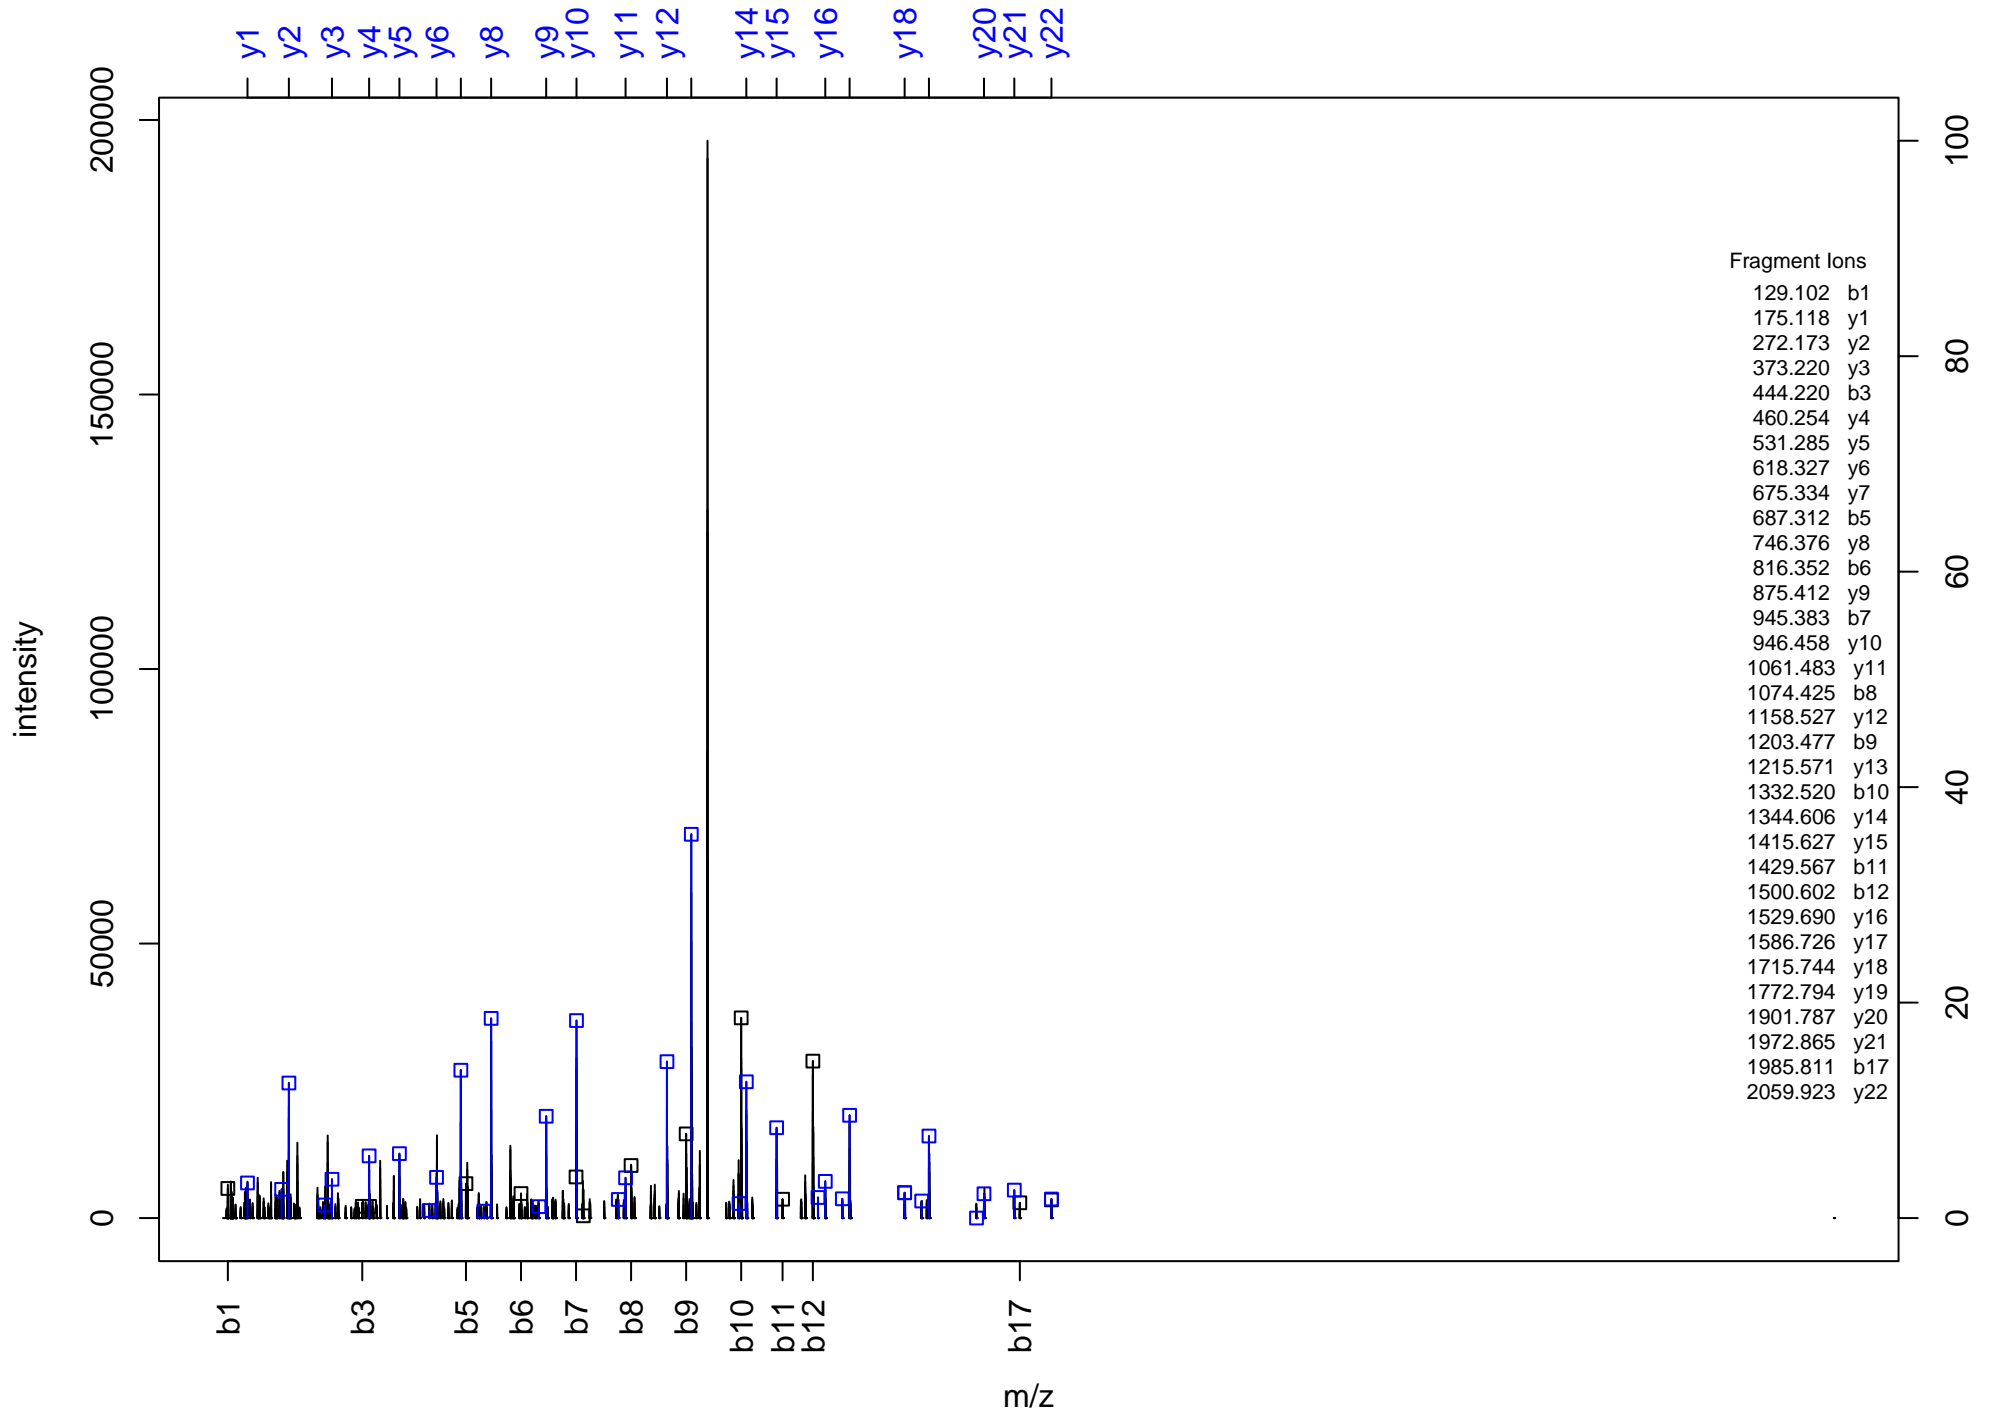

# (Ac)AVEELQSIK

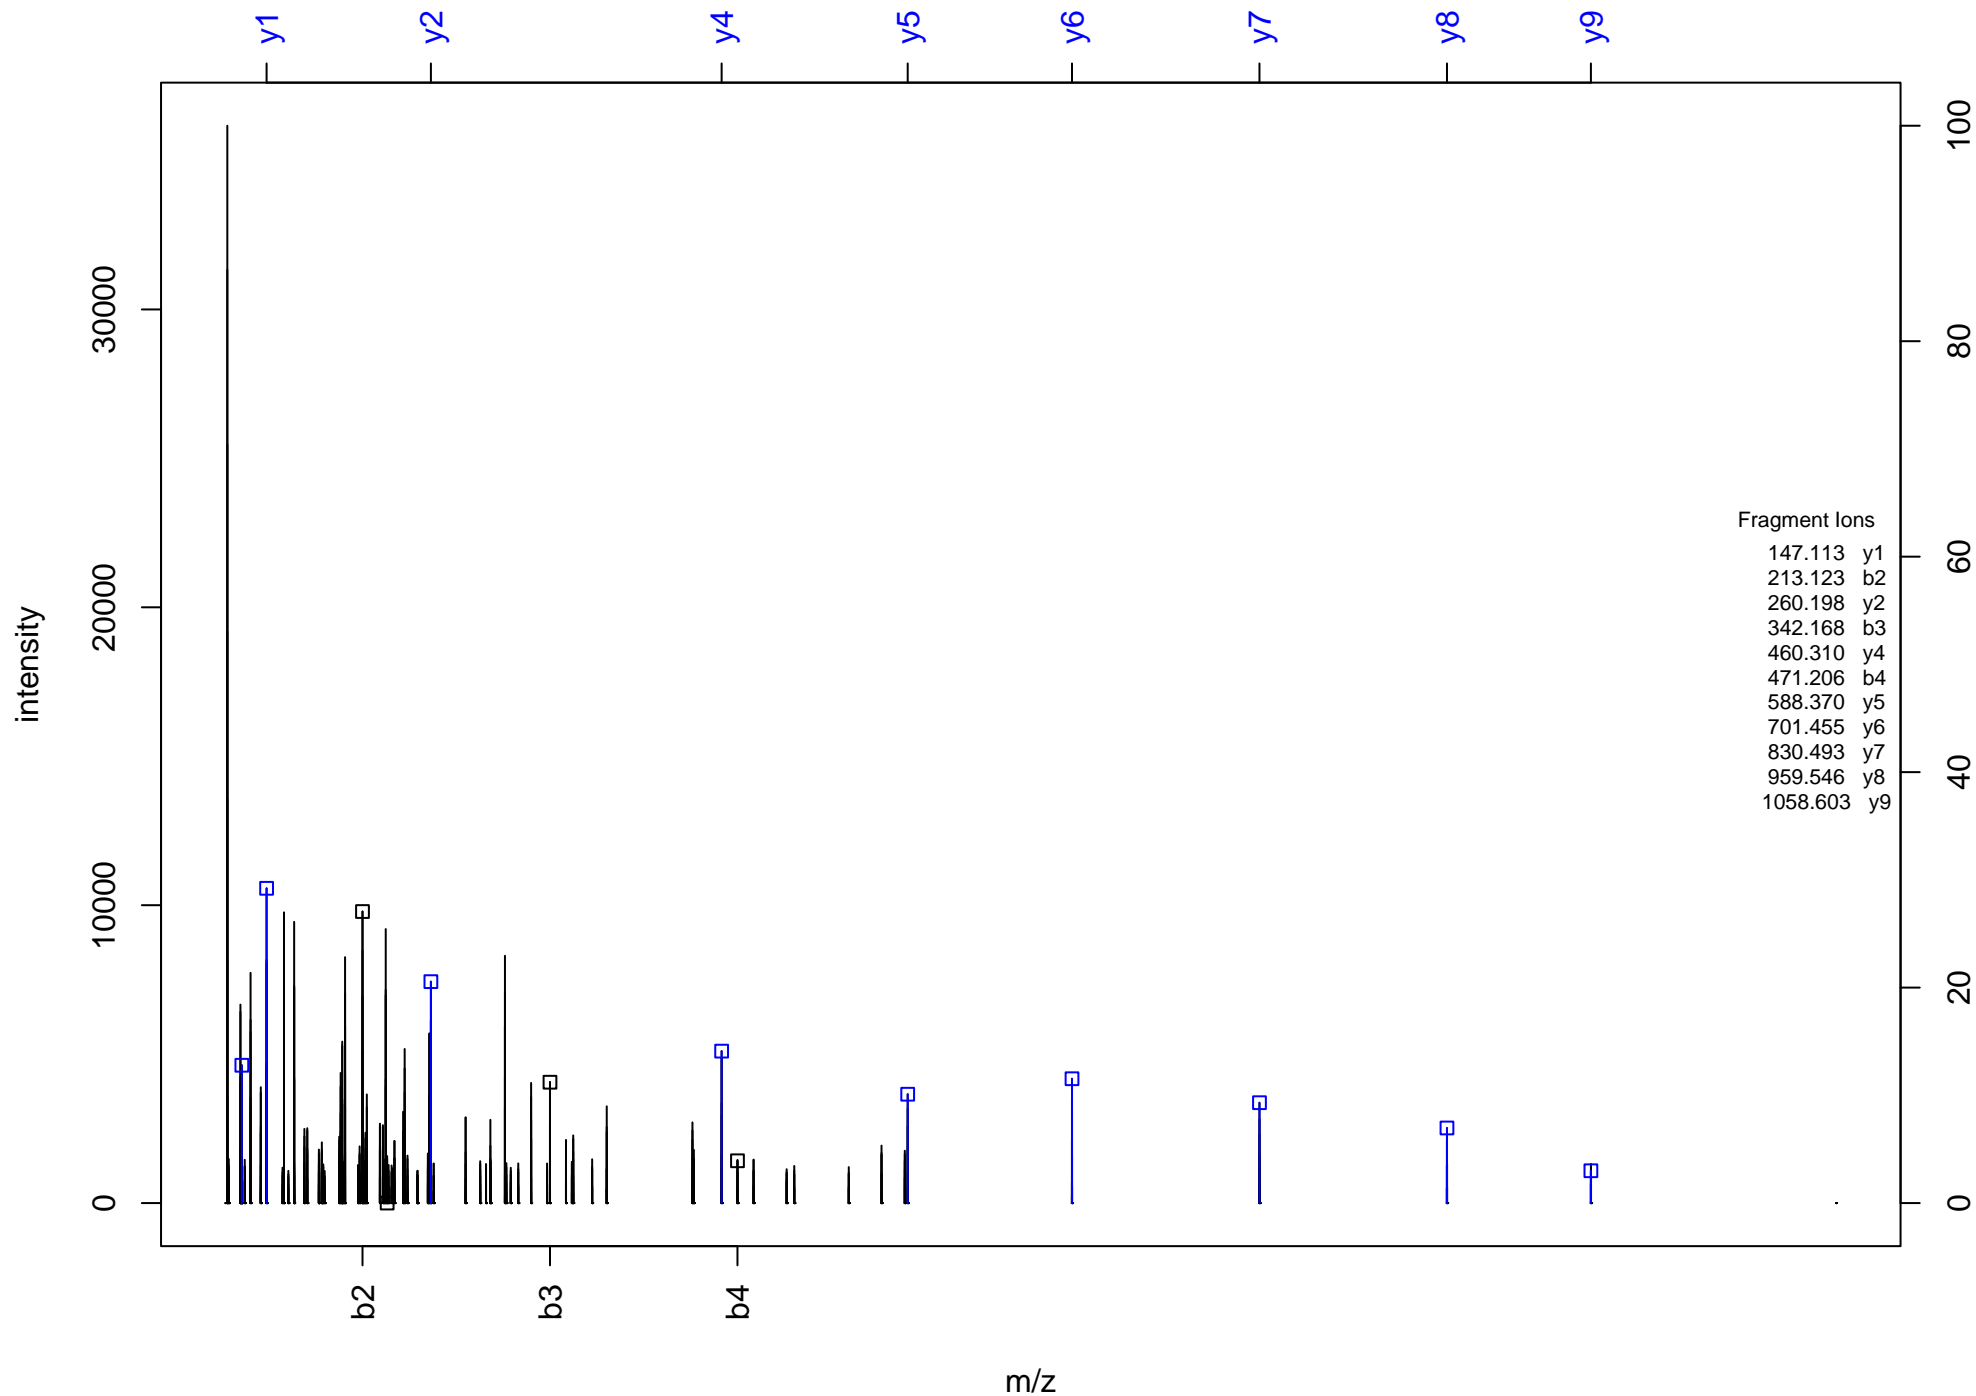

# VIKM\*SKQ^N^GR

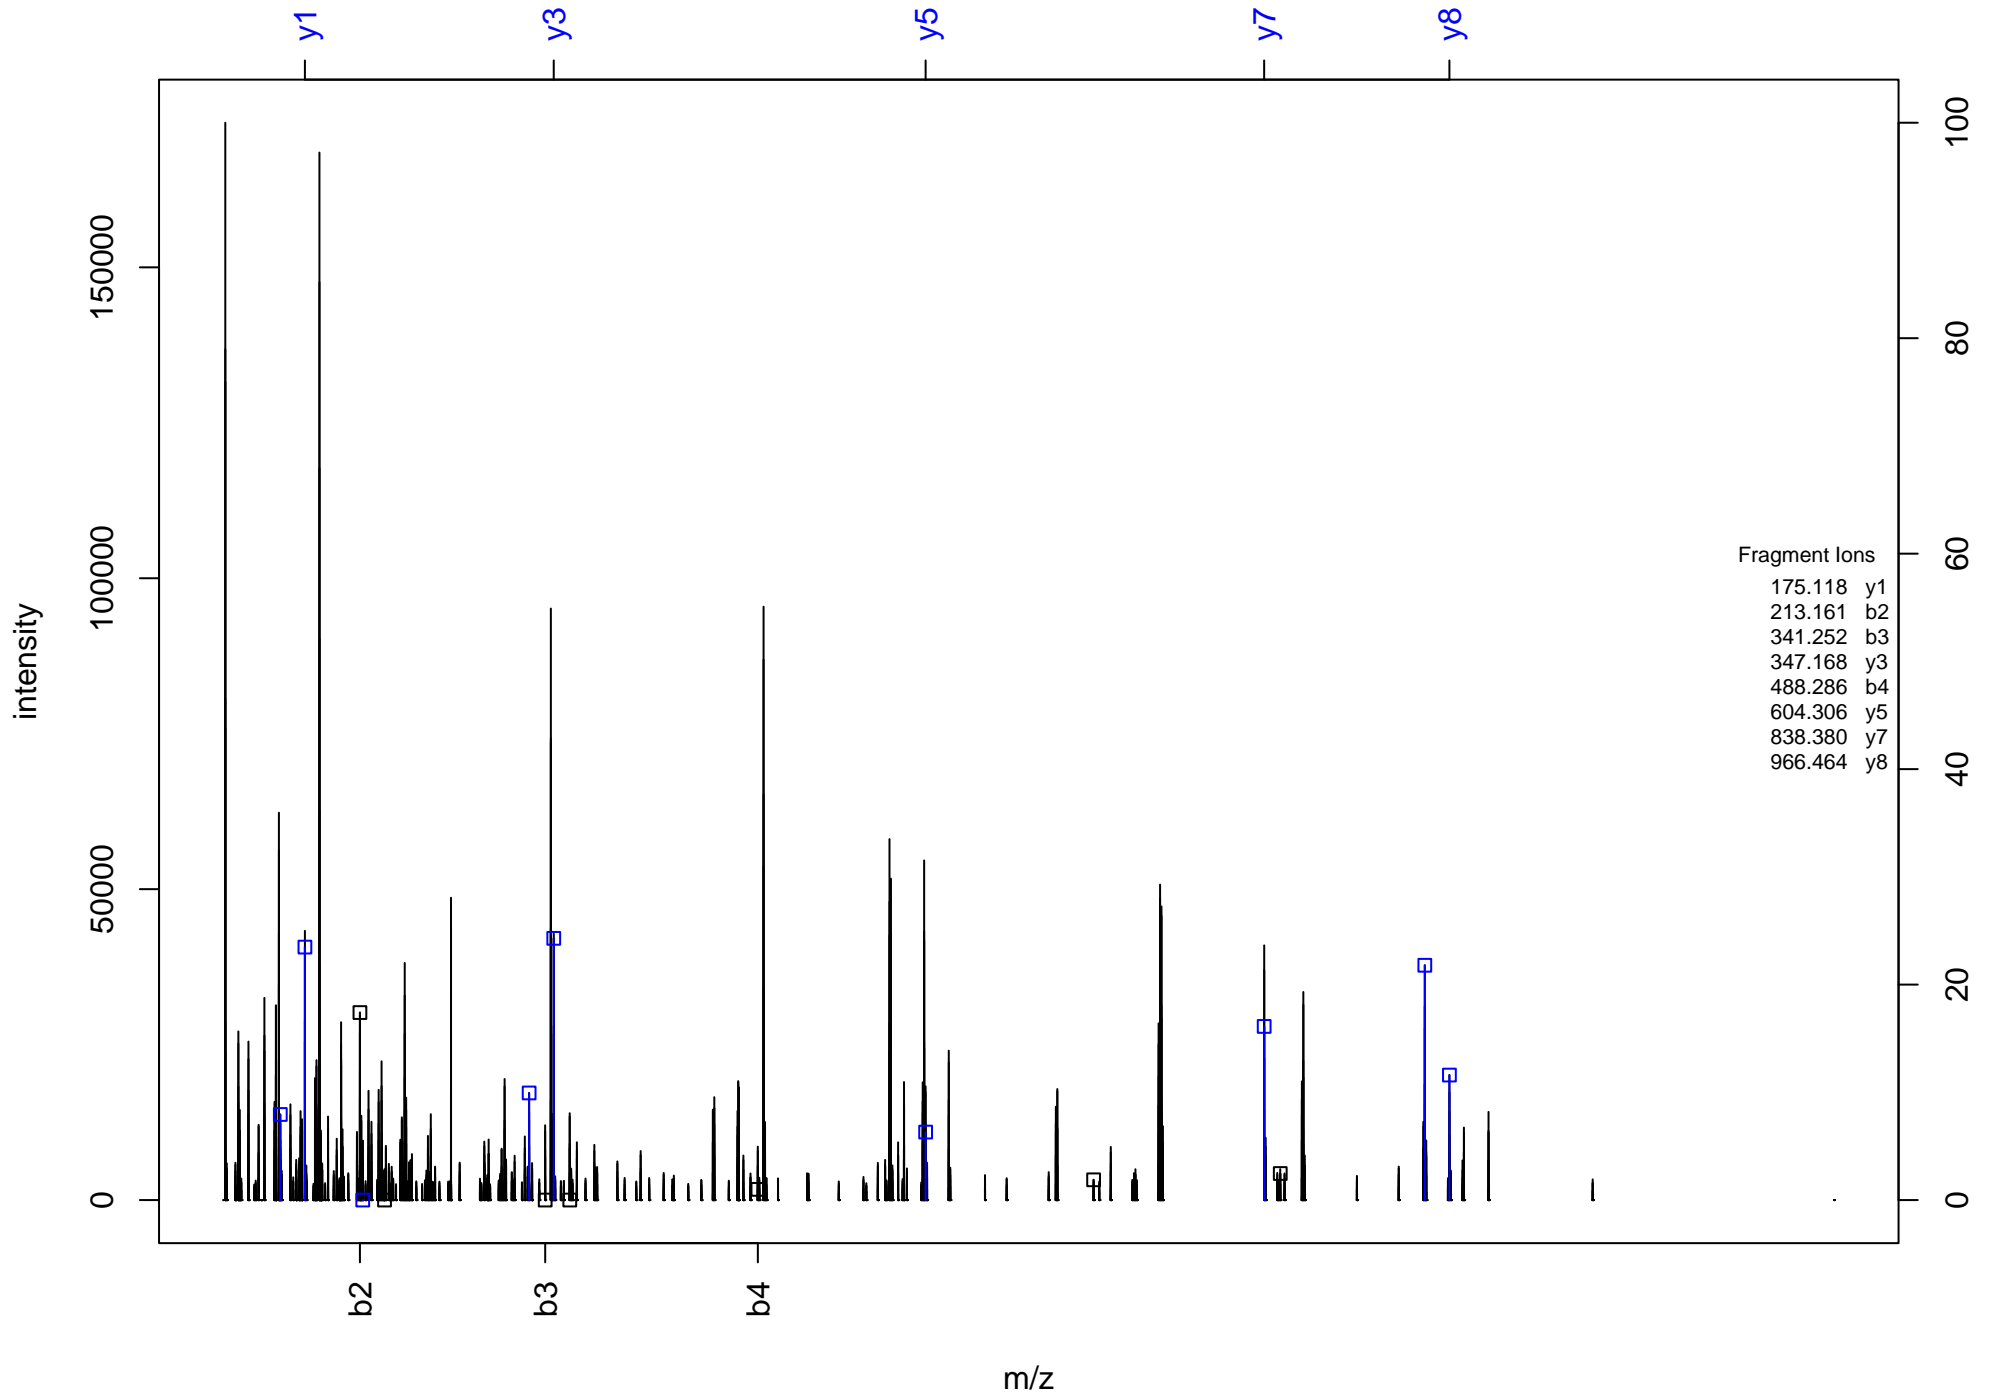

# VSVVPDEVATIASEVNSFSR

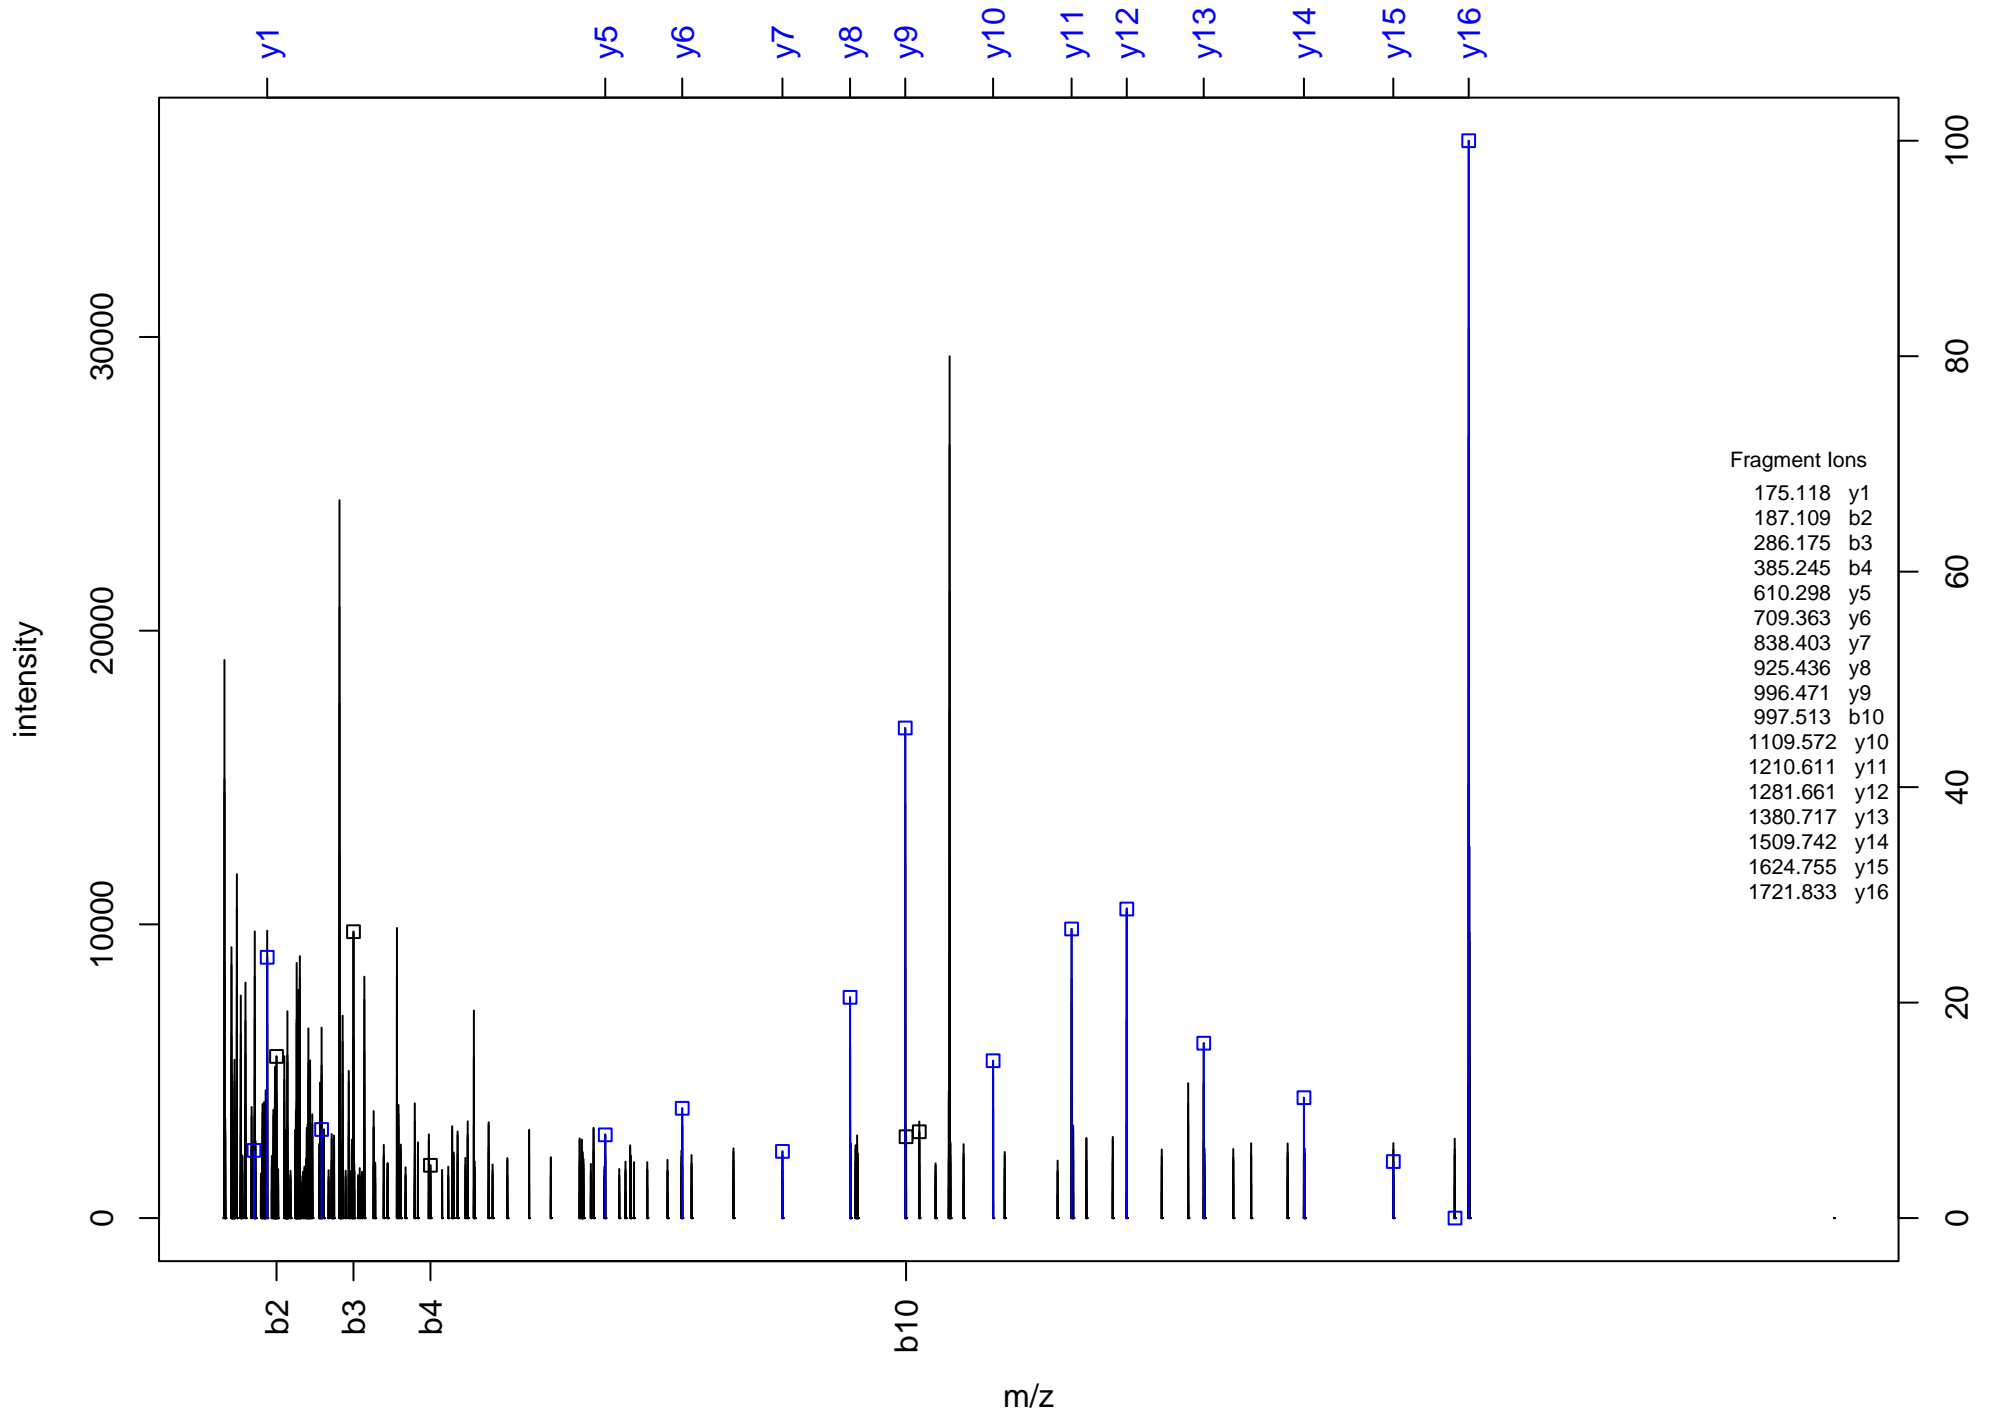

# FYTEDSPGLK

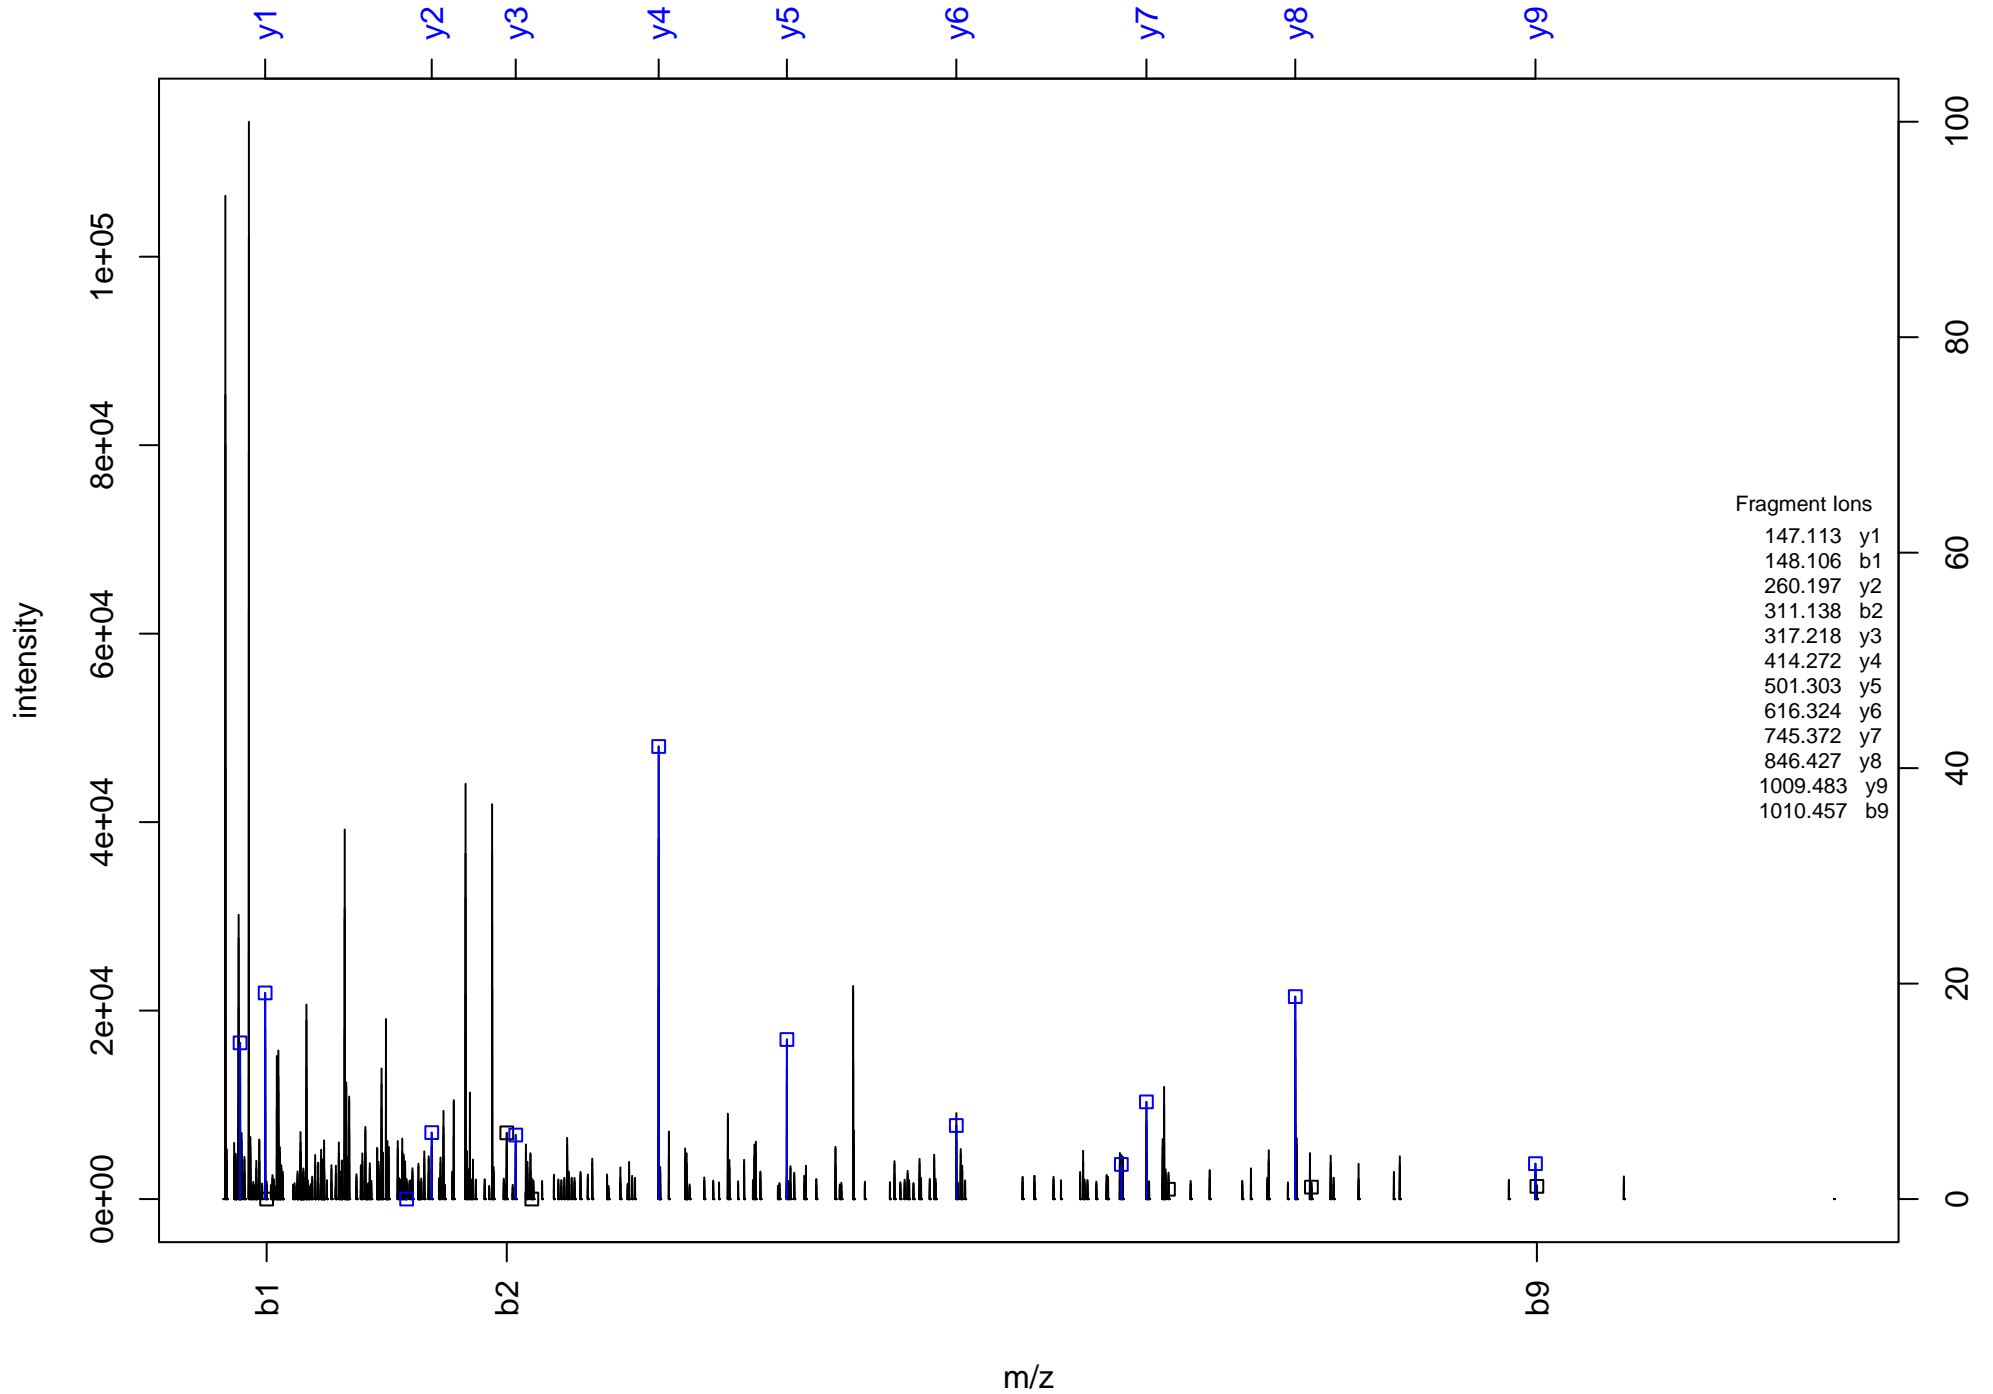

# FLDPDMYSLIDDSTGDLR

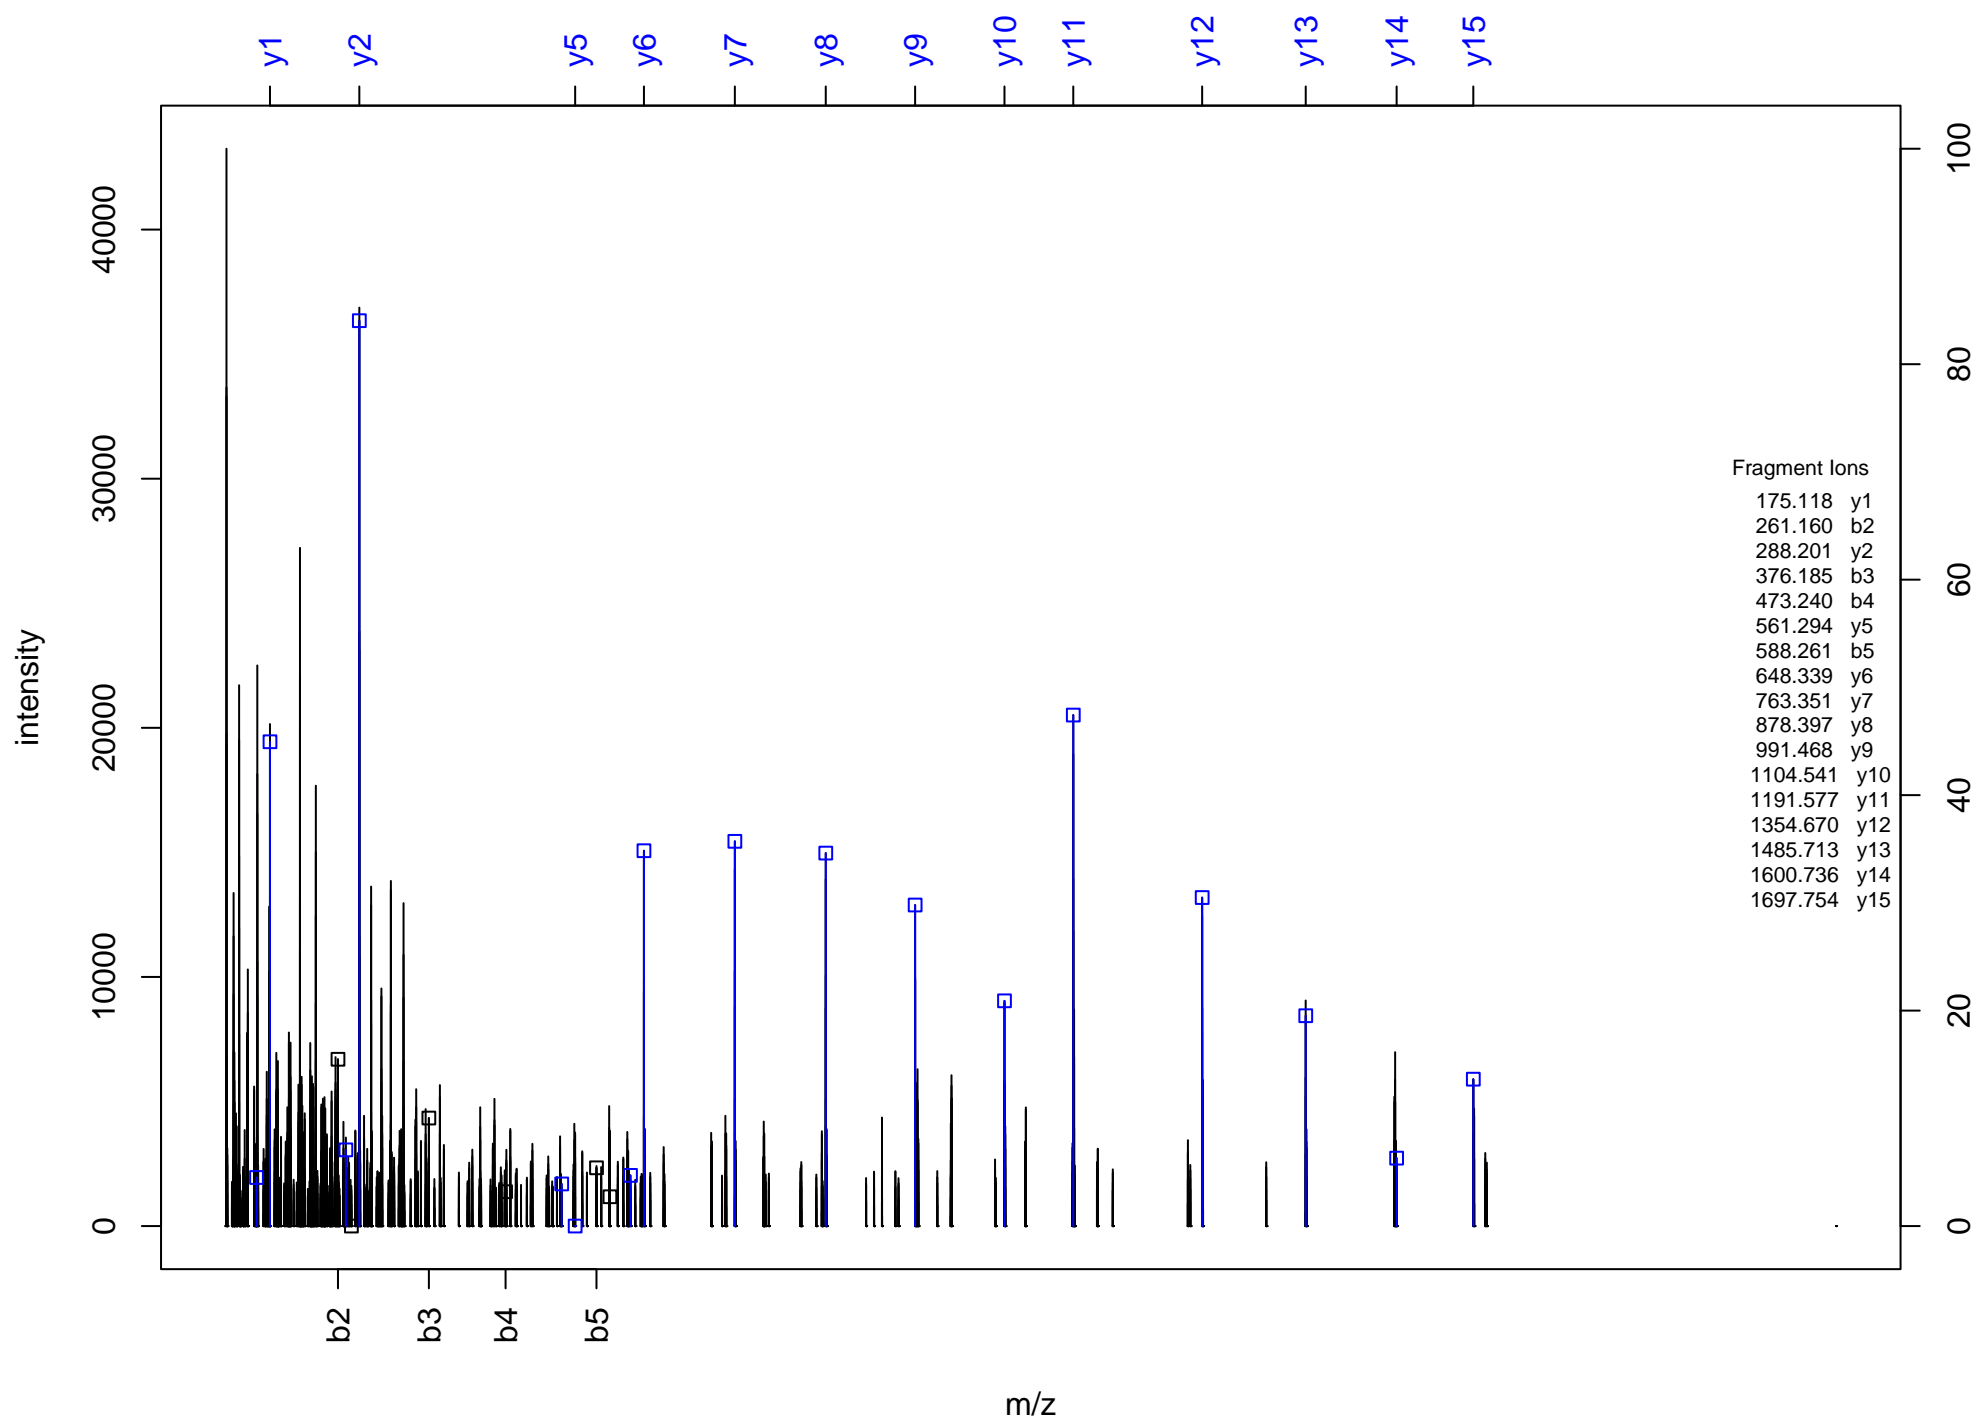

# LLSVTPTSEGYSIK

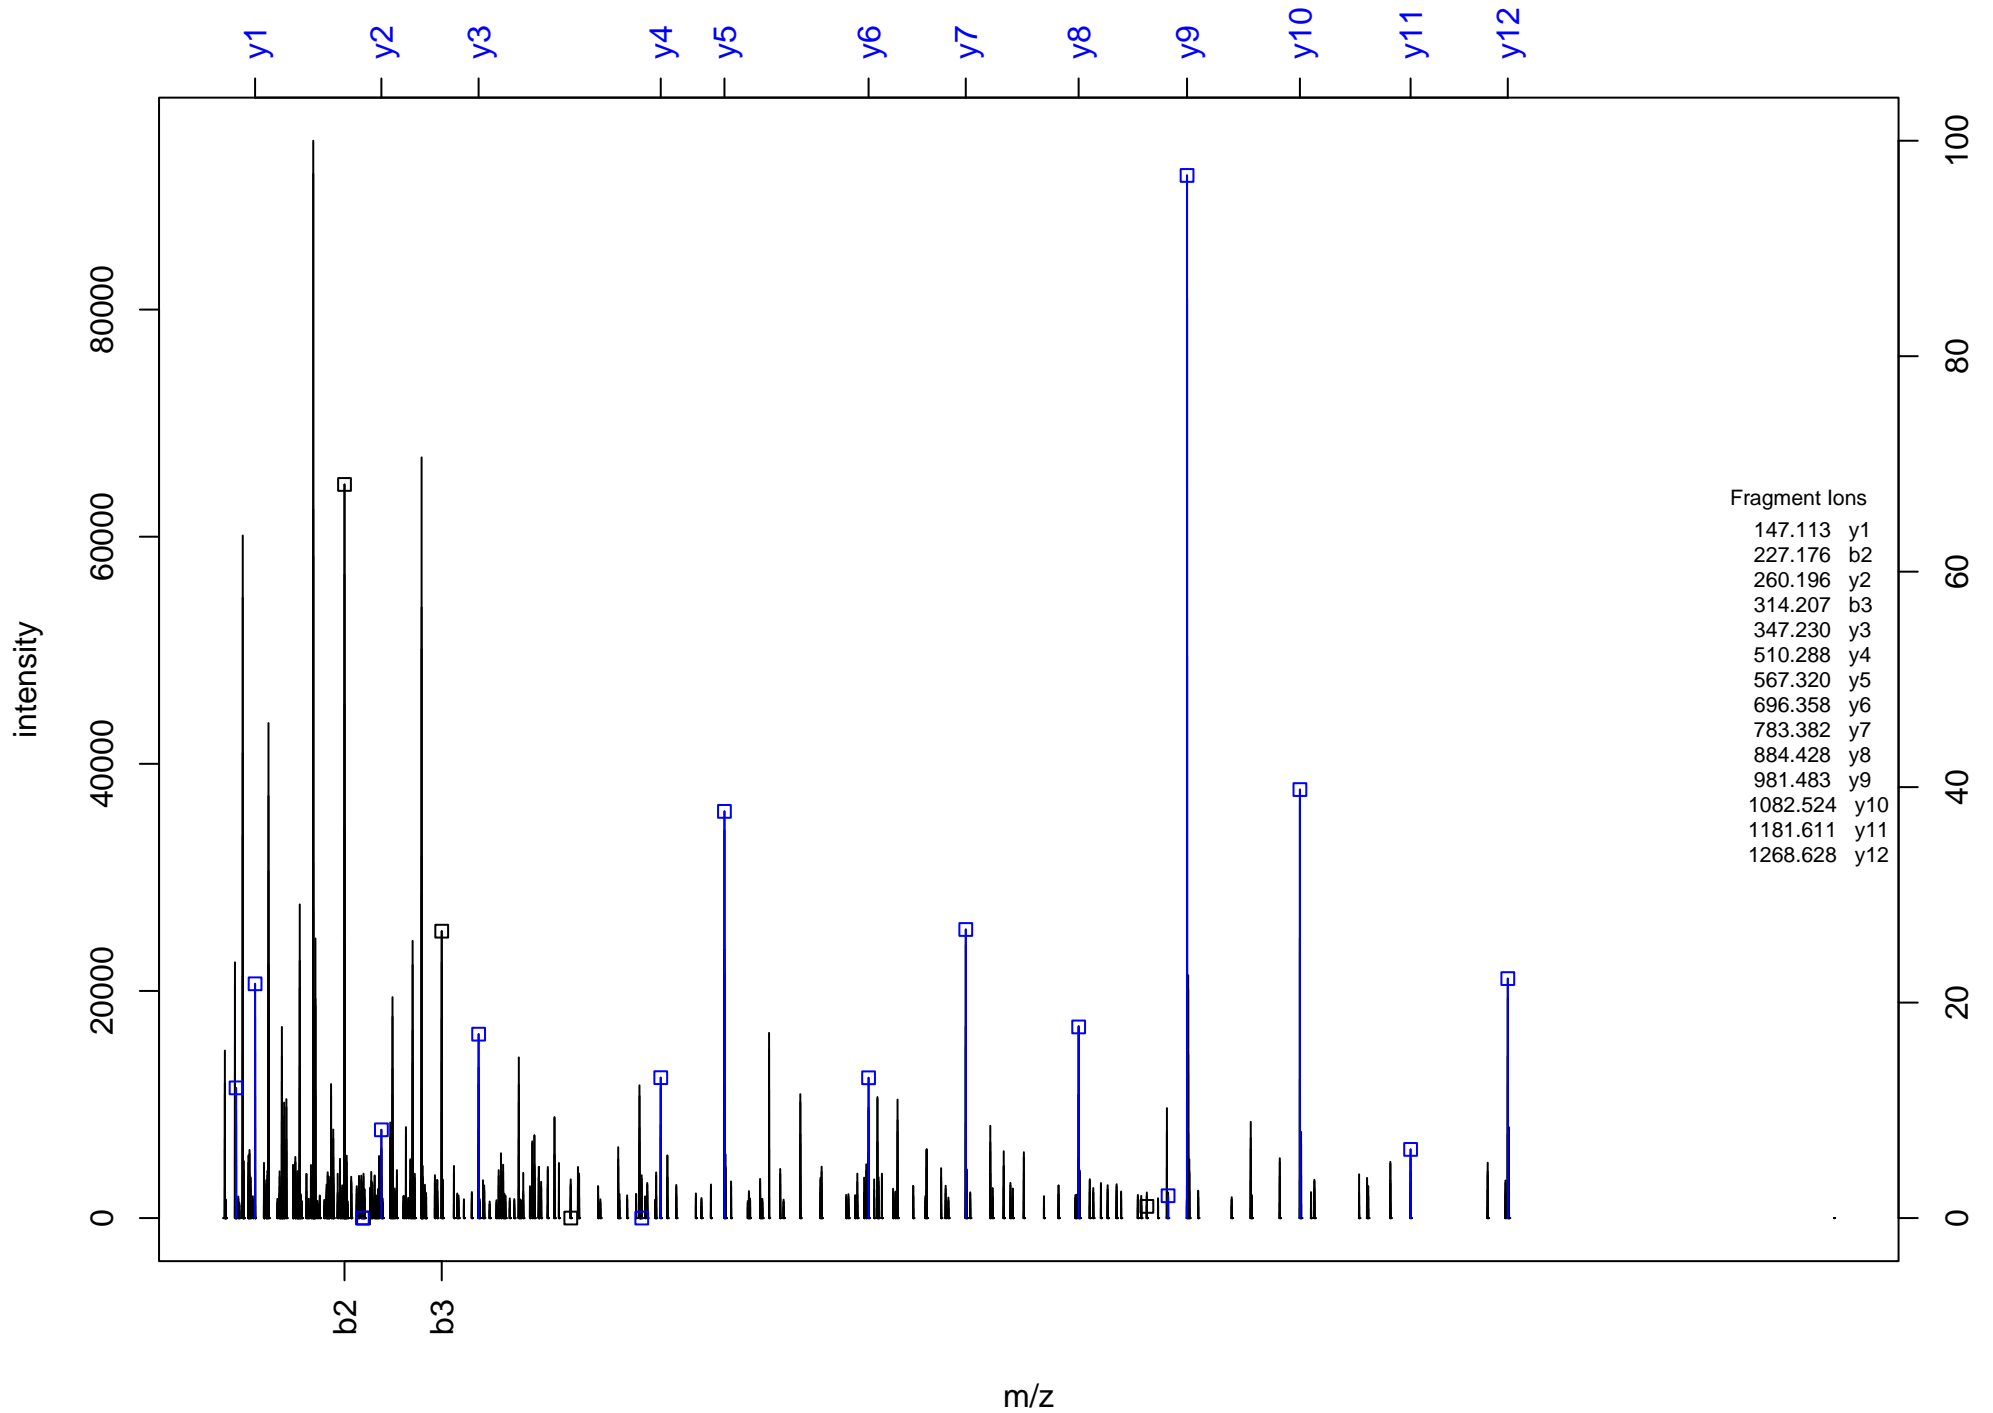

# EFPGFLENQK

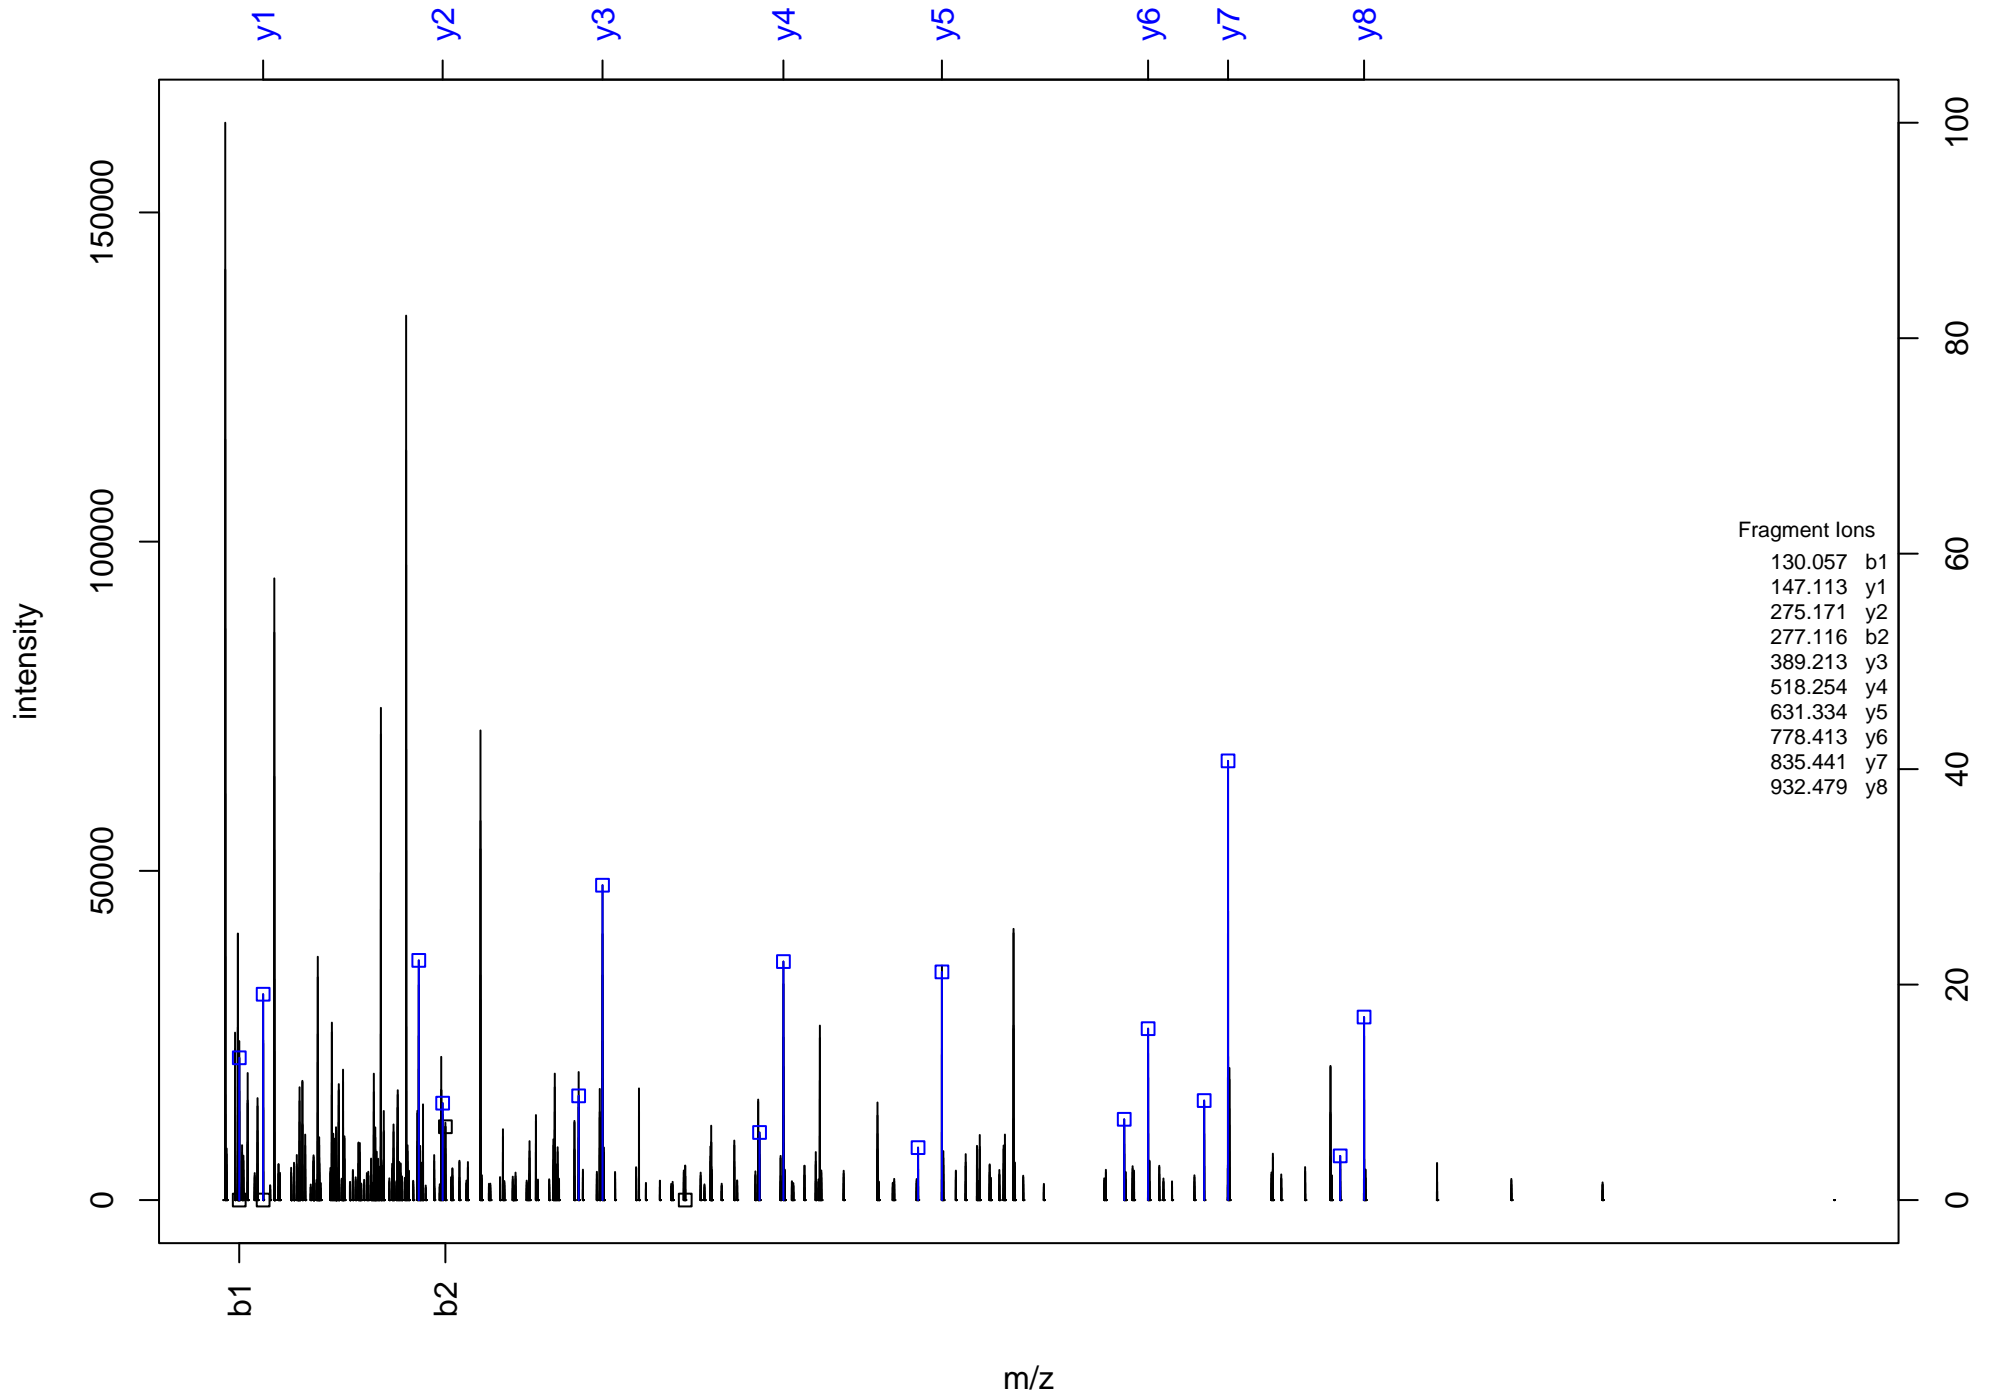



# LLDYLQENPR

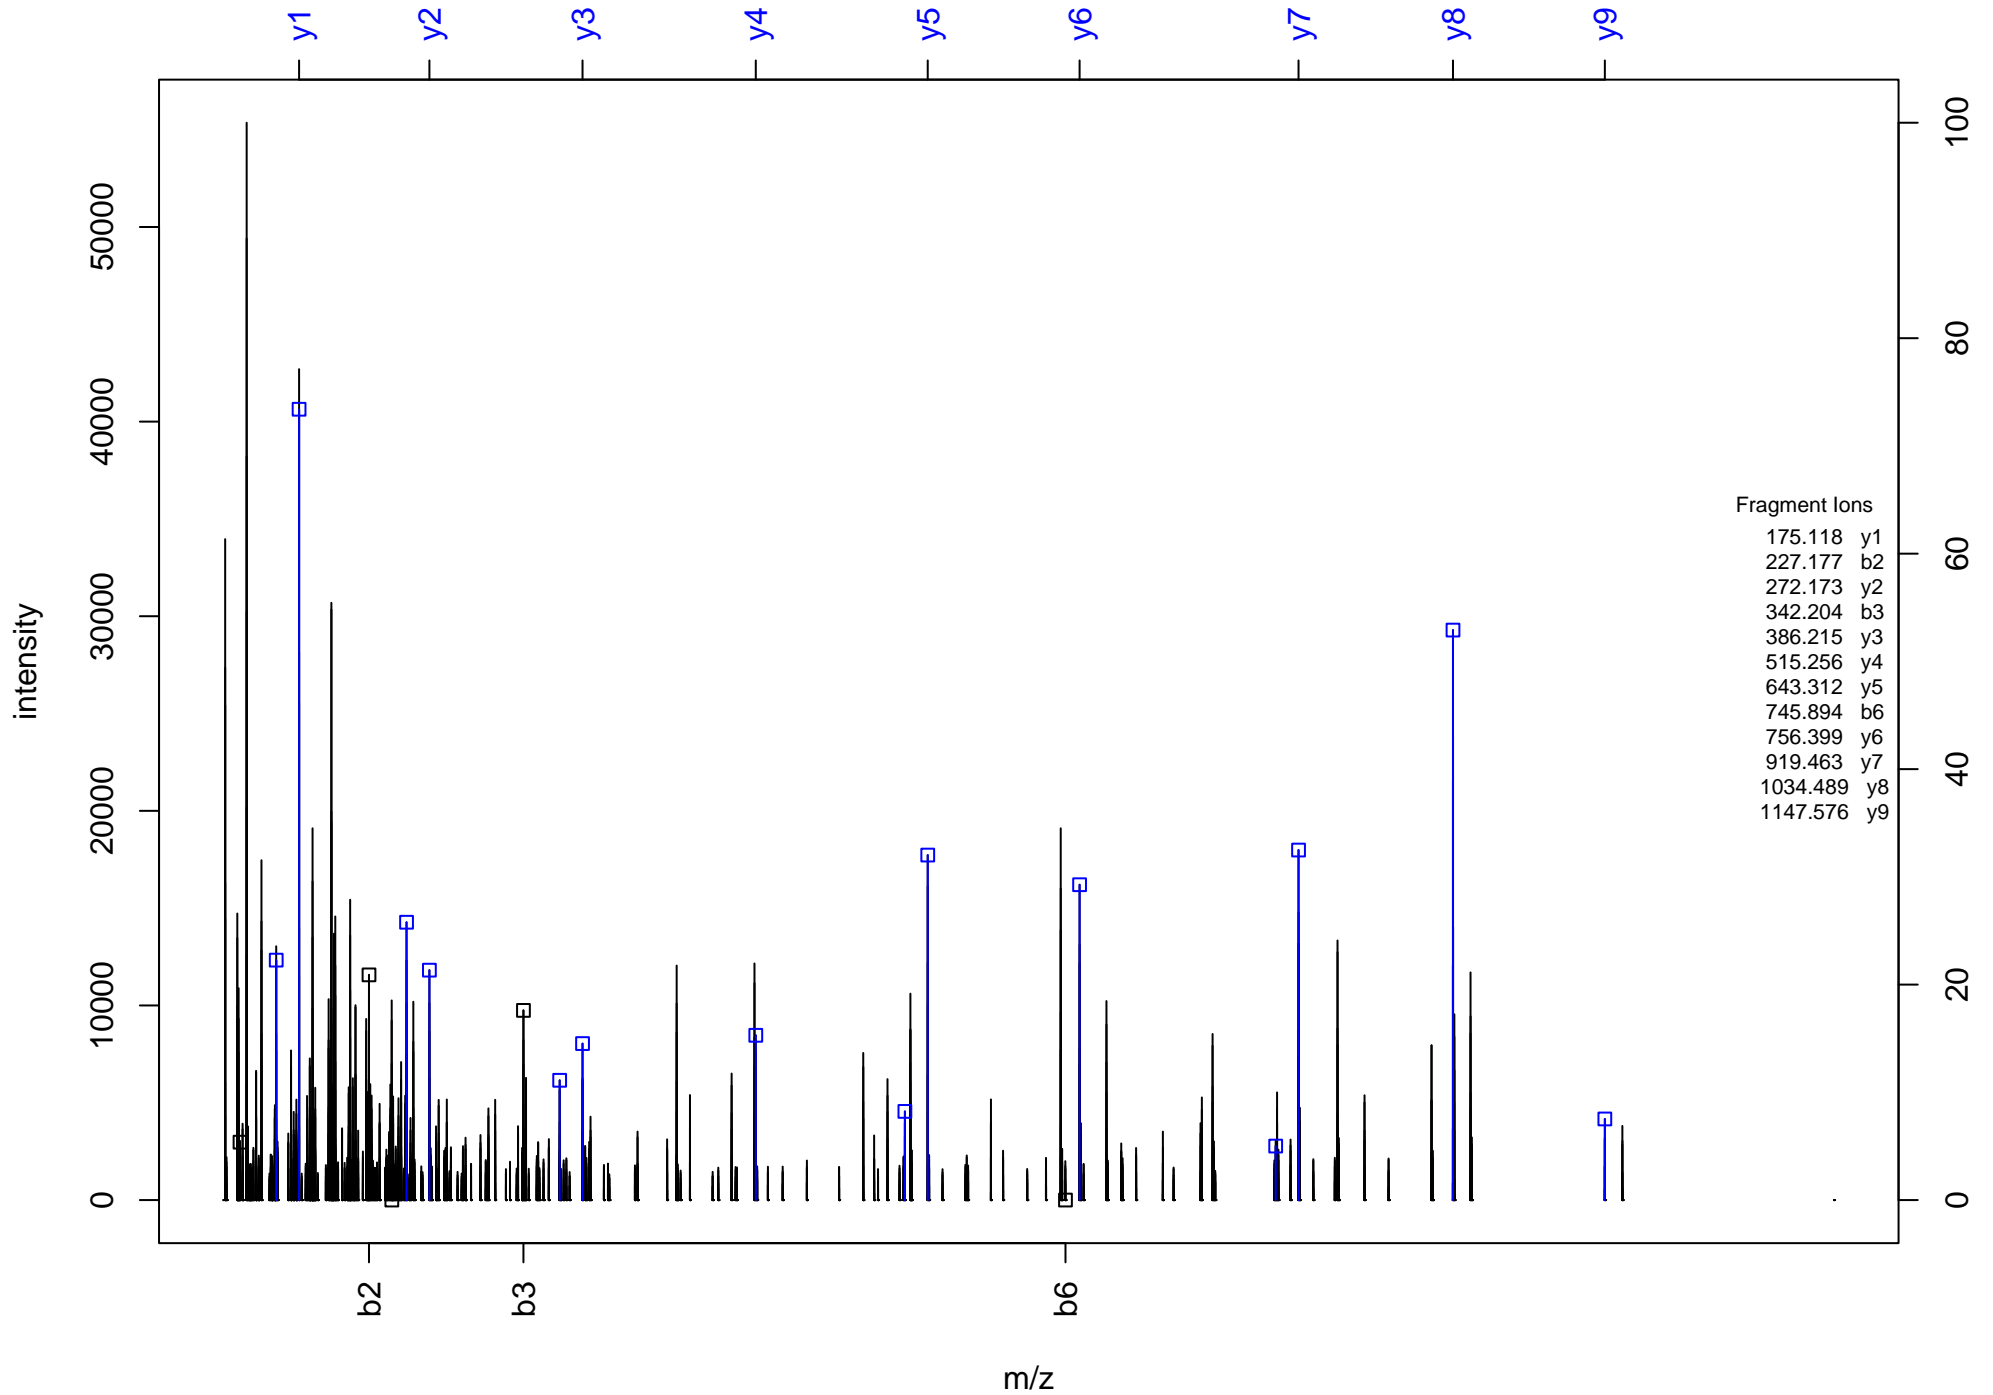

# LDIIQ<sup>+</sup>PLPETCEEISSDALTVR

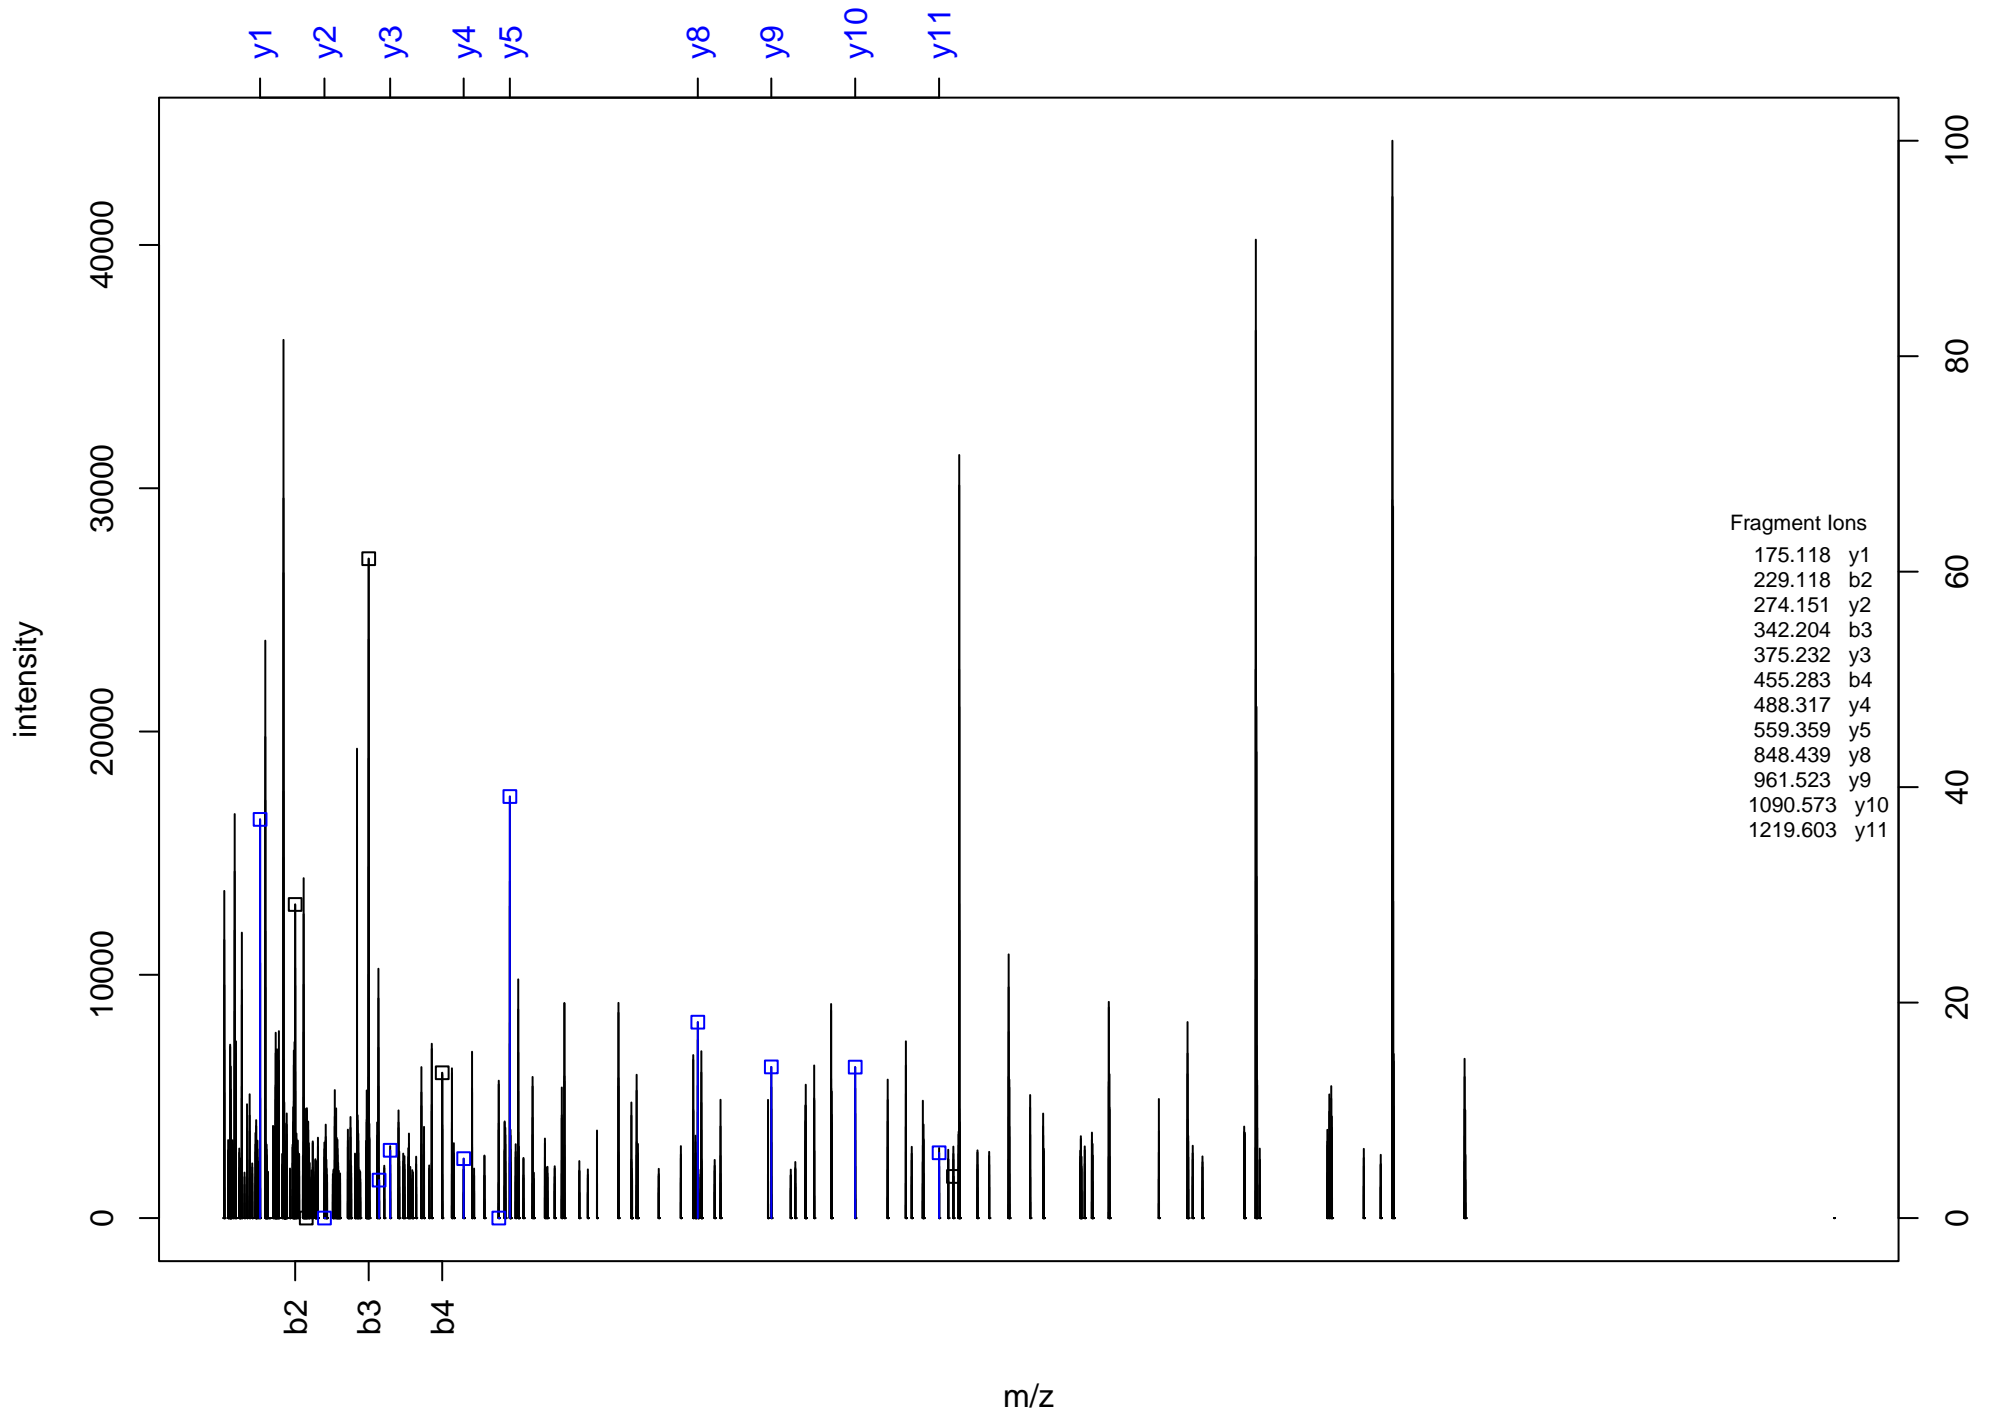

# YRQM\*NLQNIK

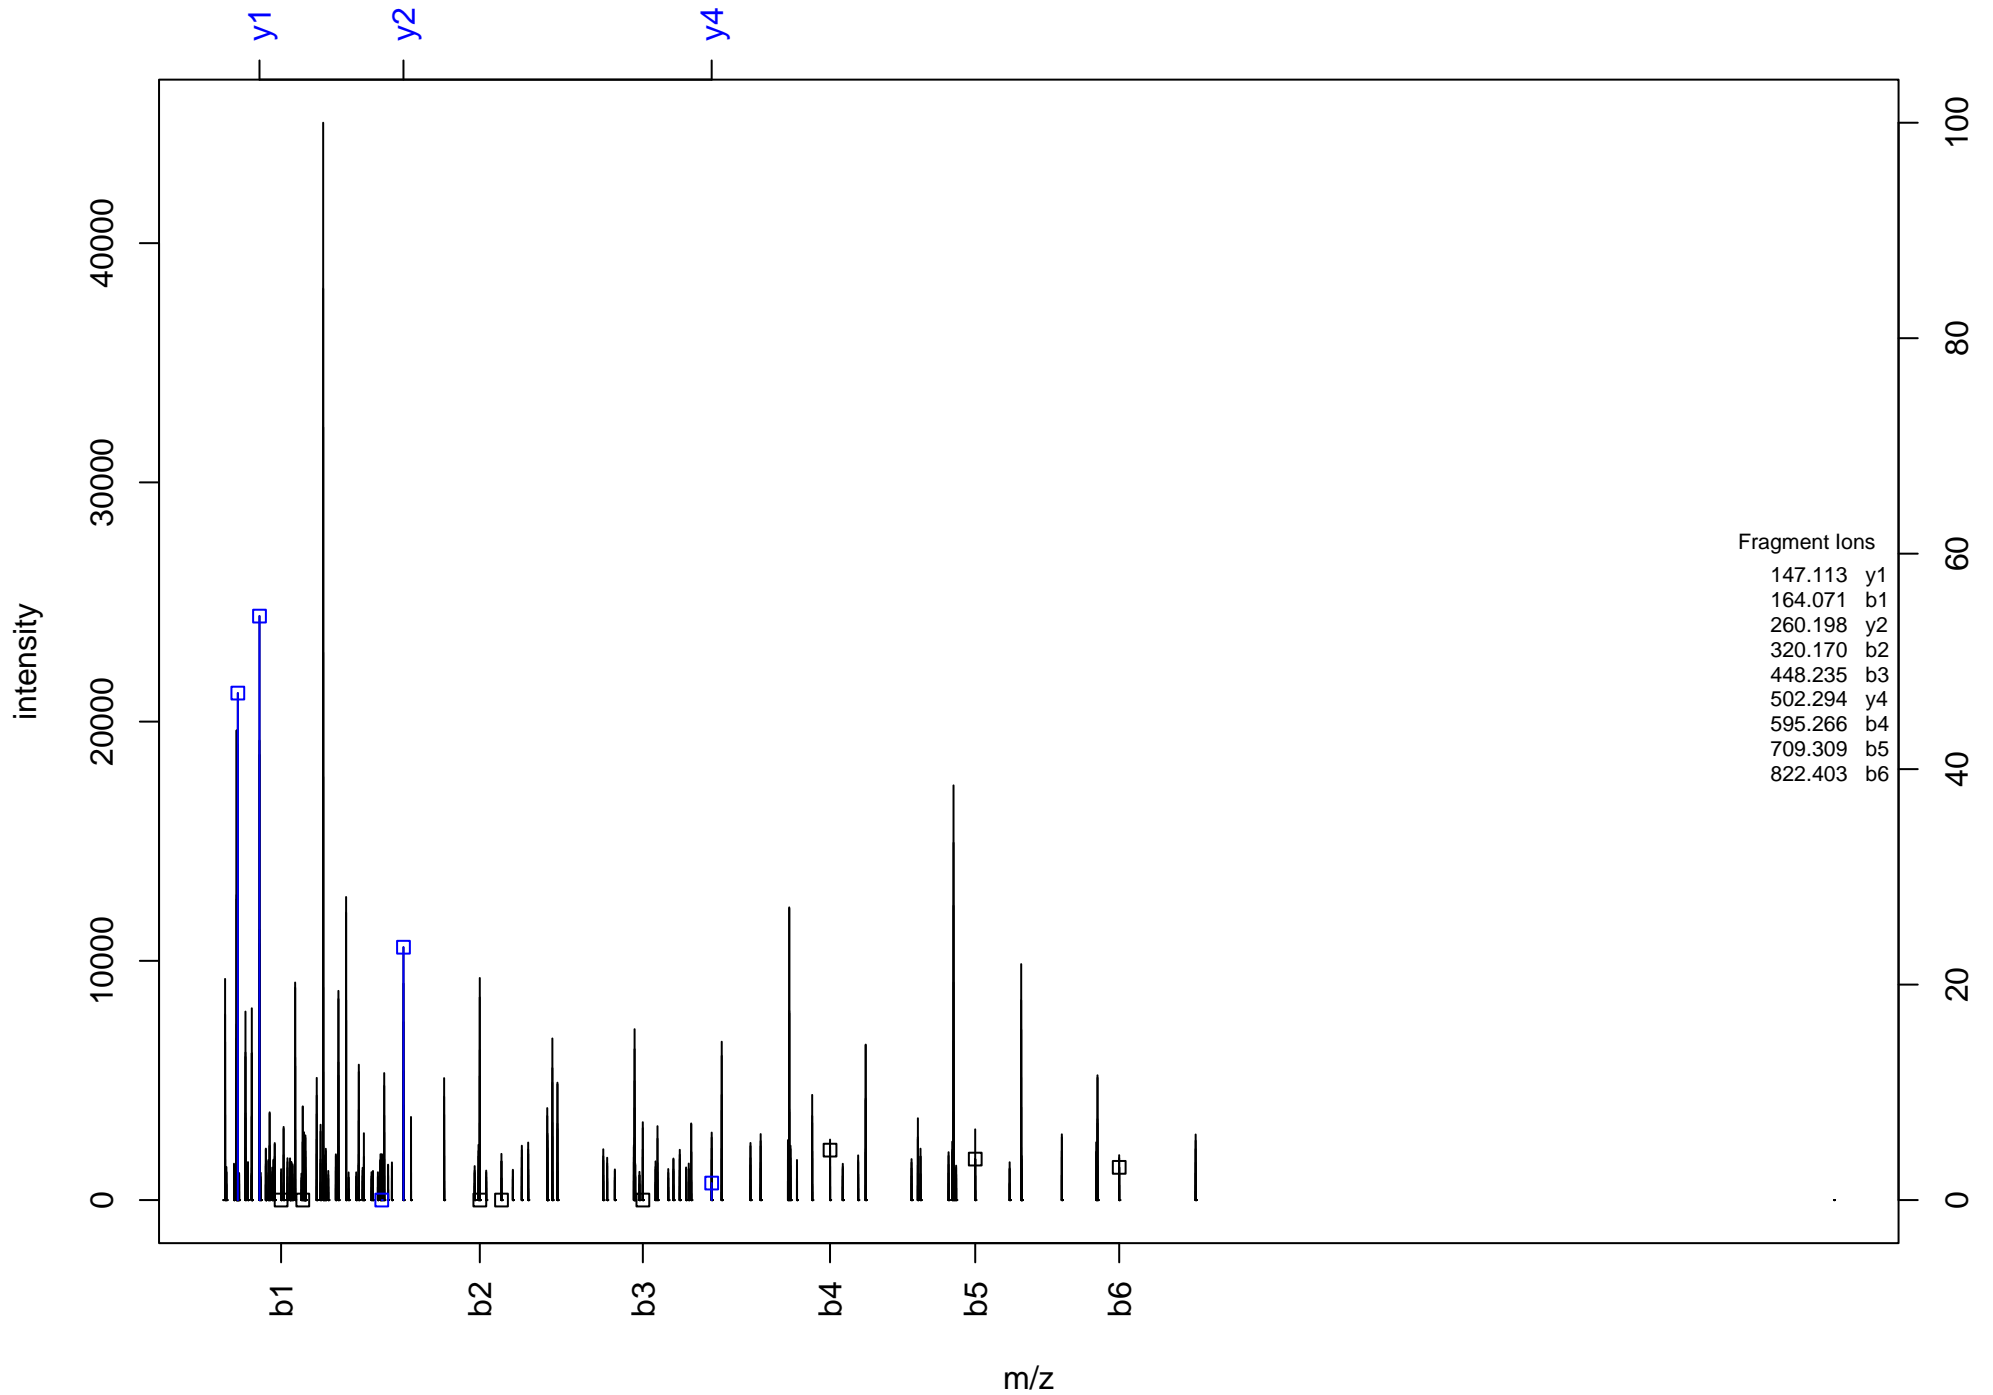

# ALIVVQQGMTPSAK

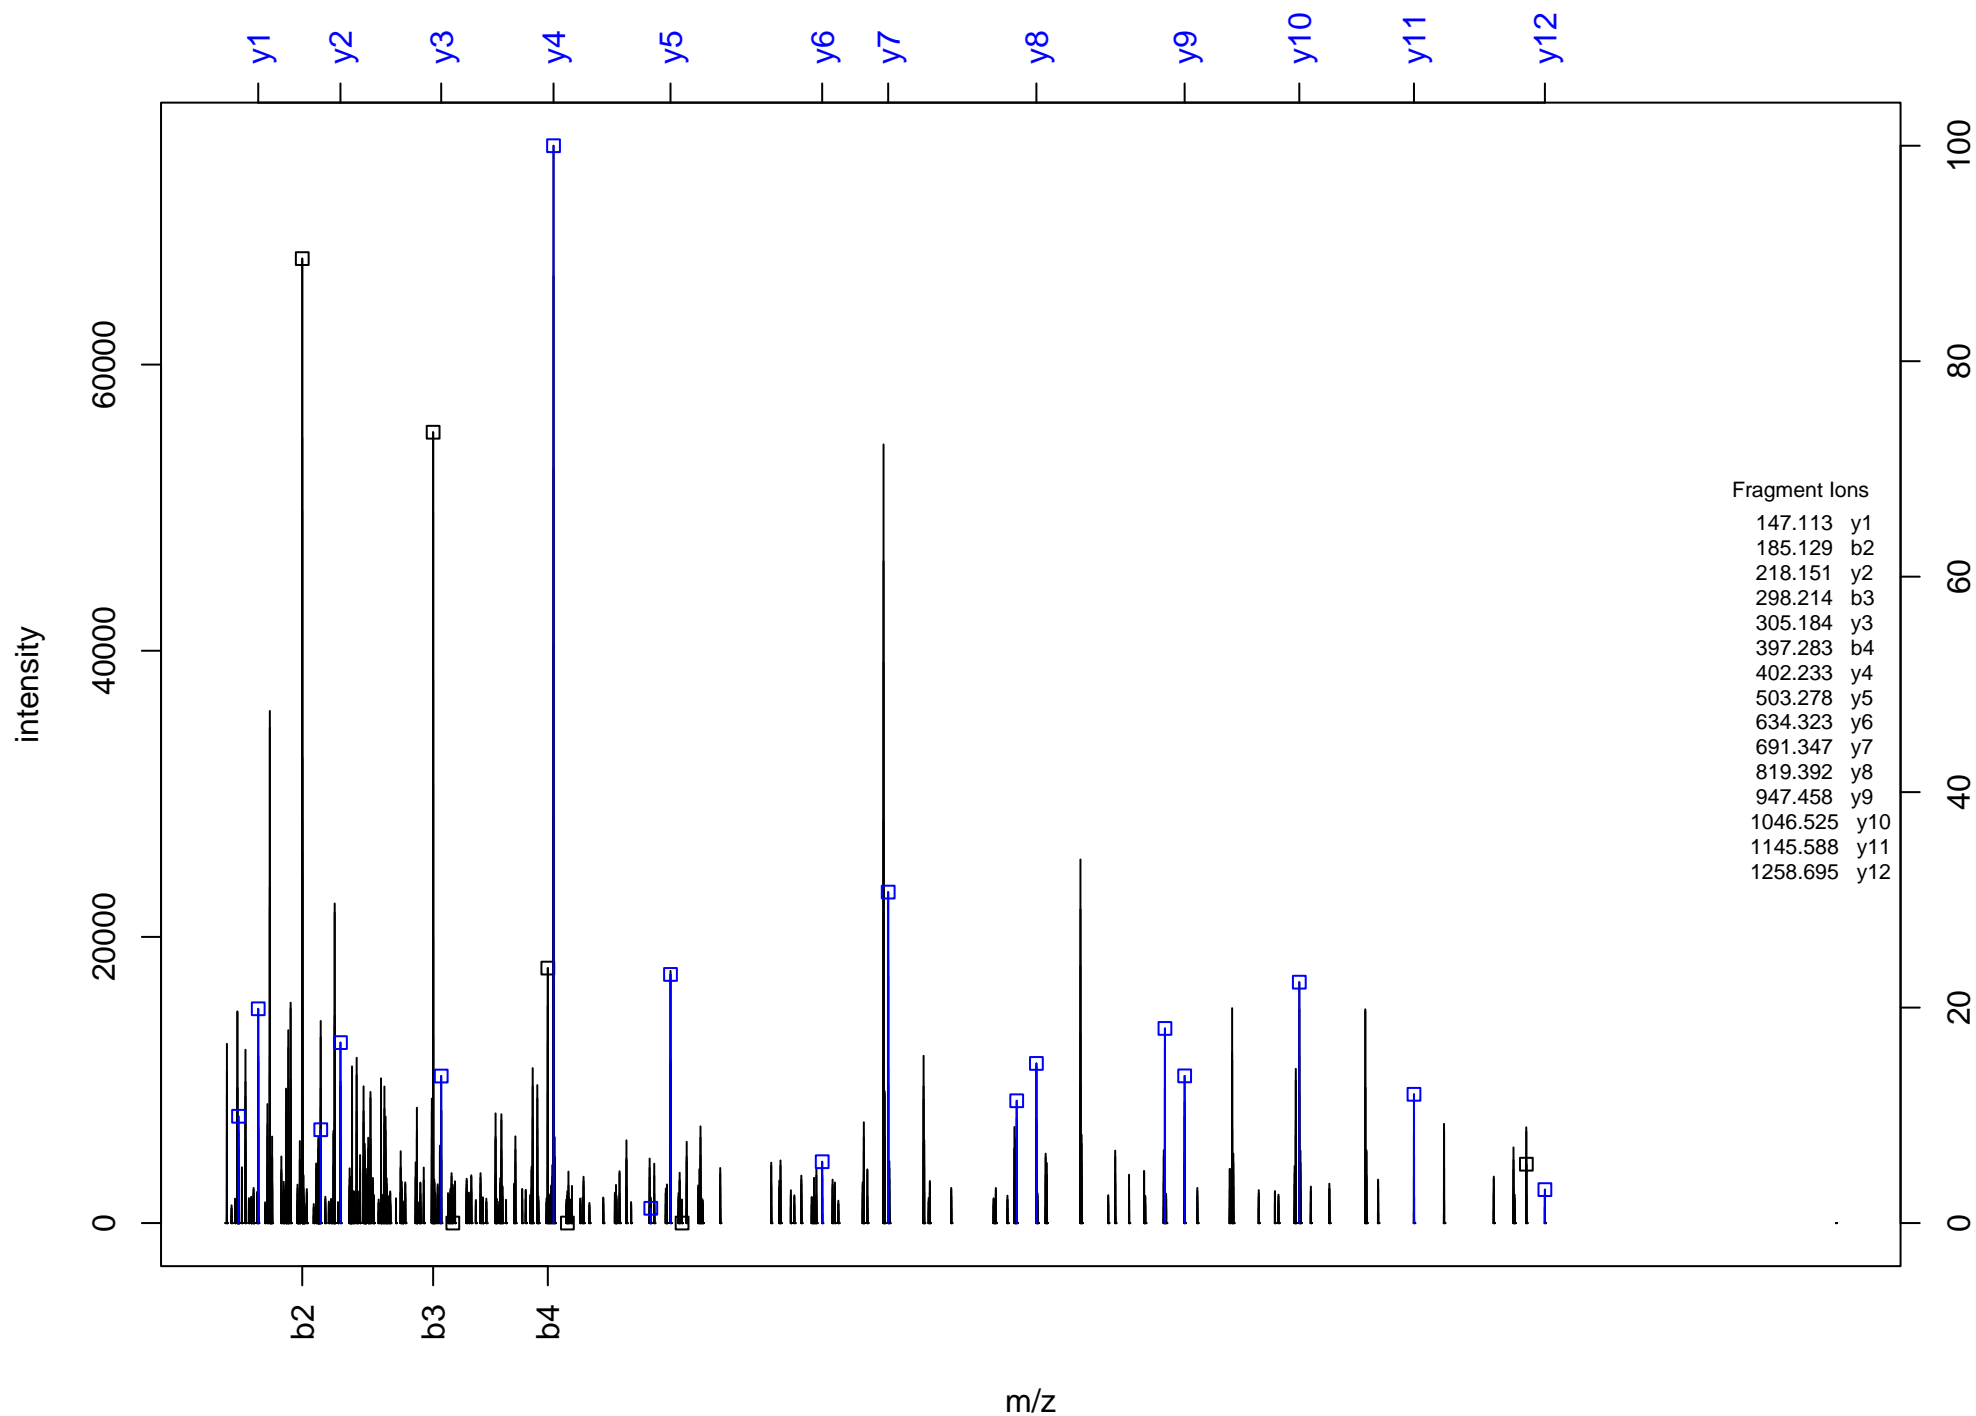

# NYDVYTAGLSEEEQLER

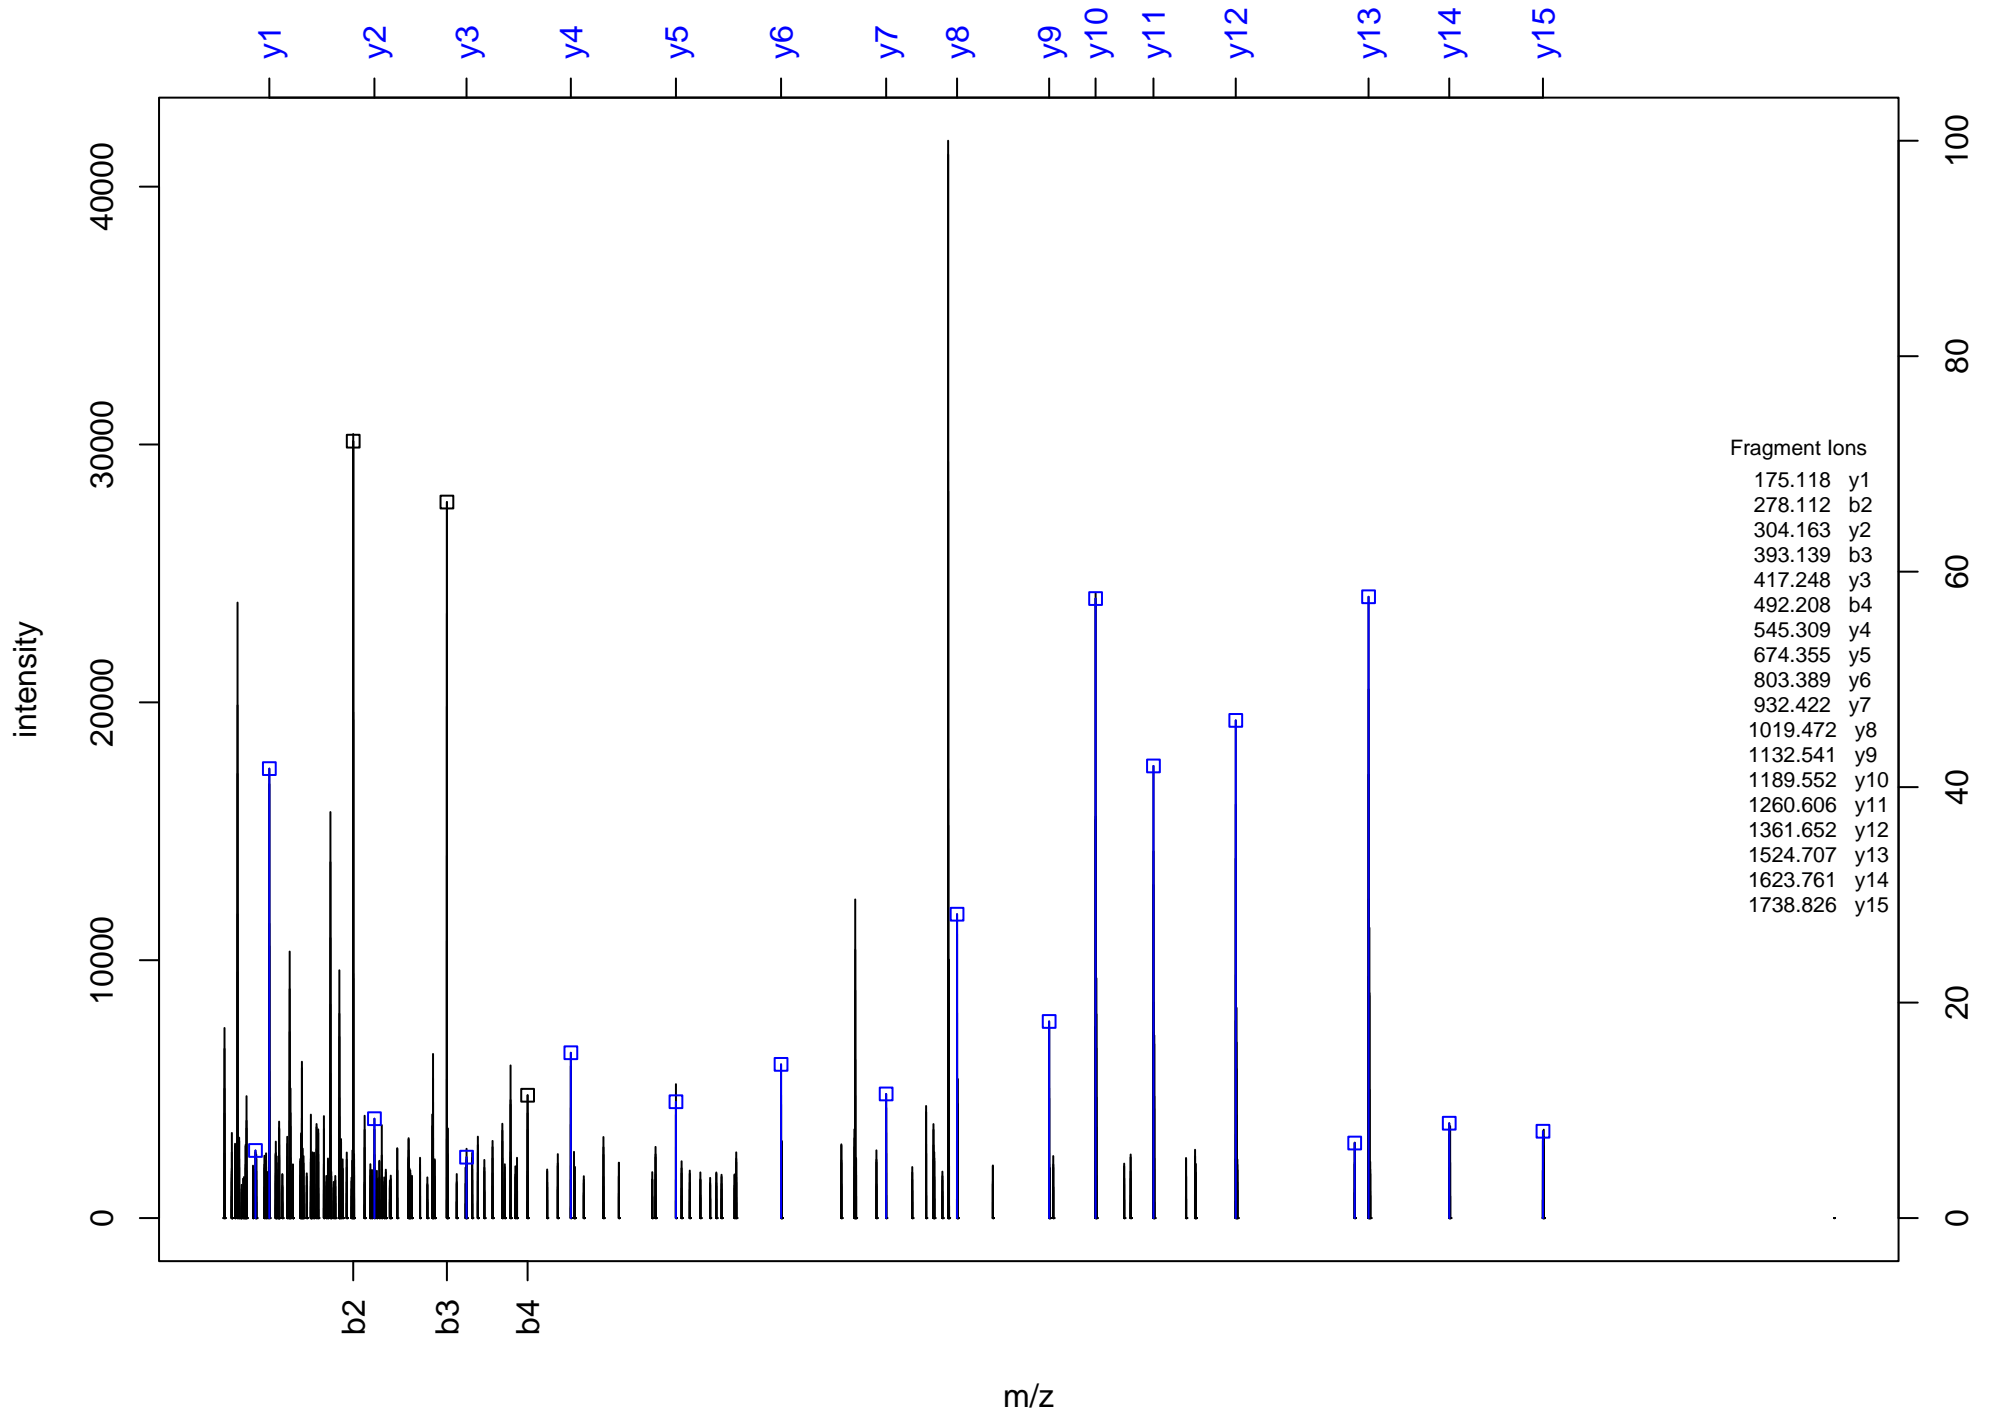

# TCHVGDENQEQQDVCSEPFEEETSQK

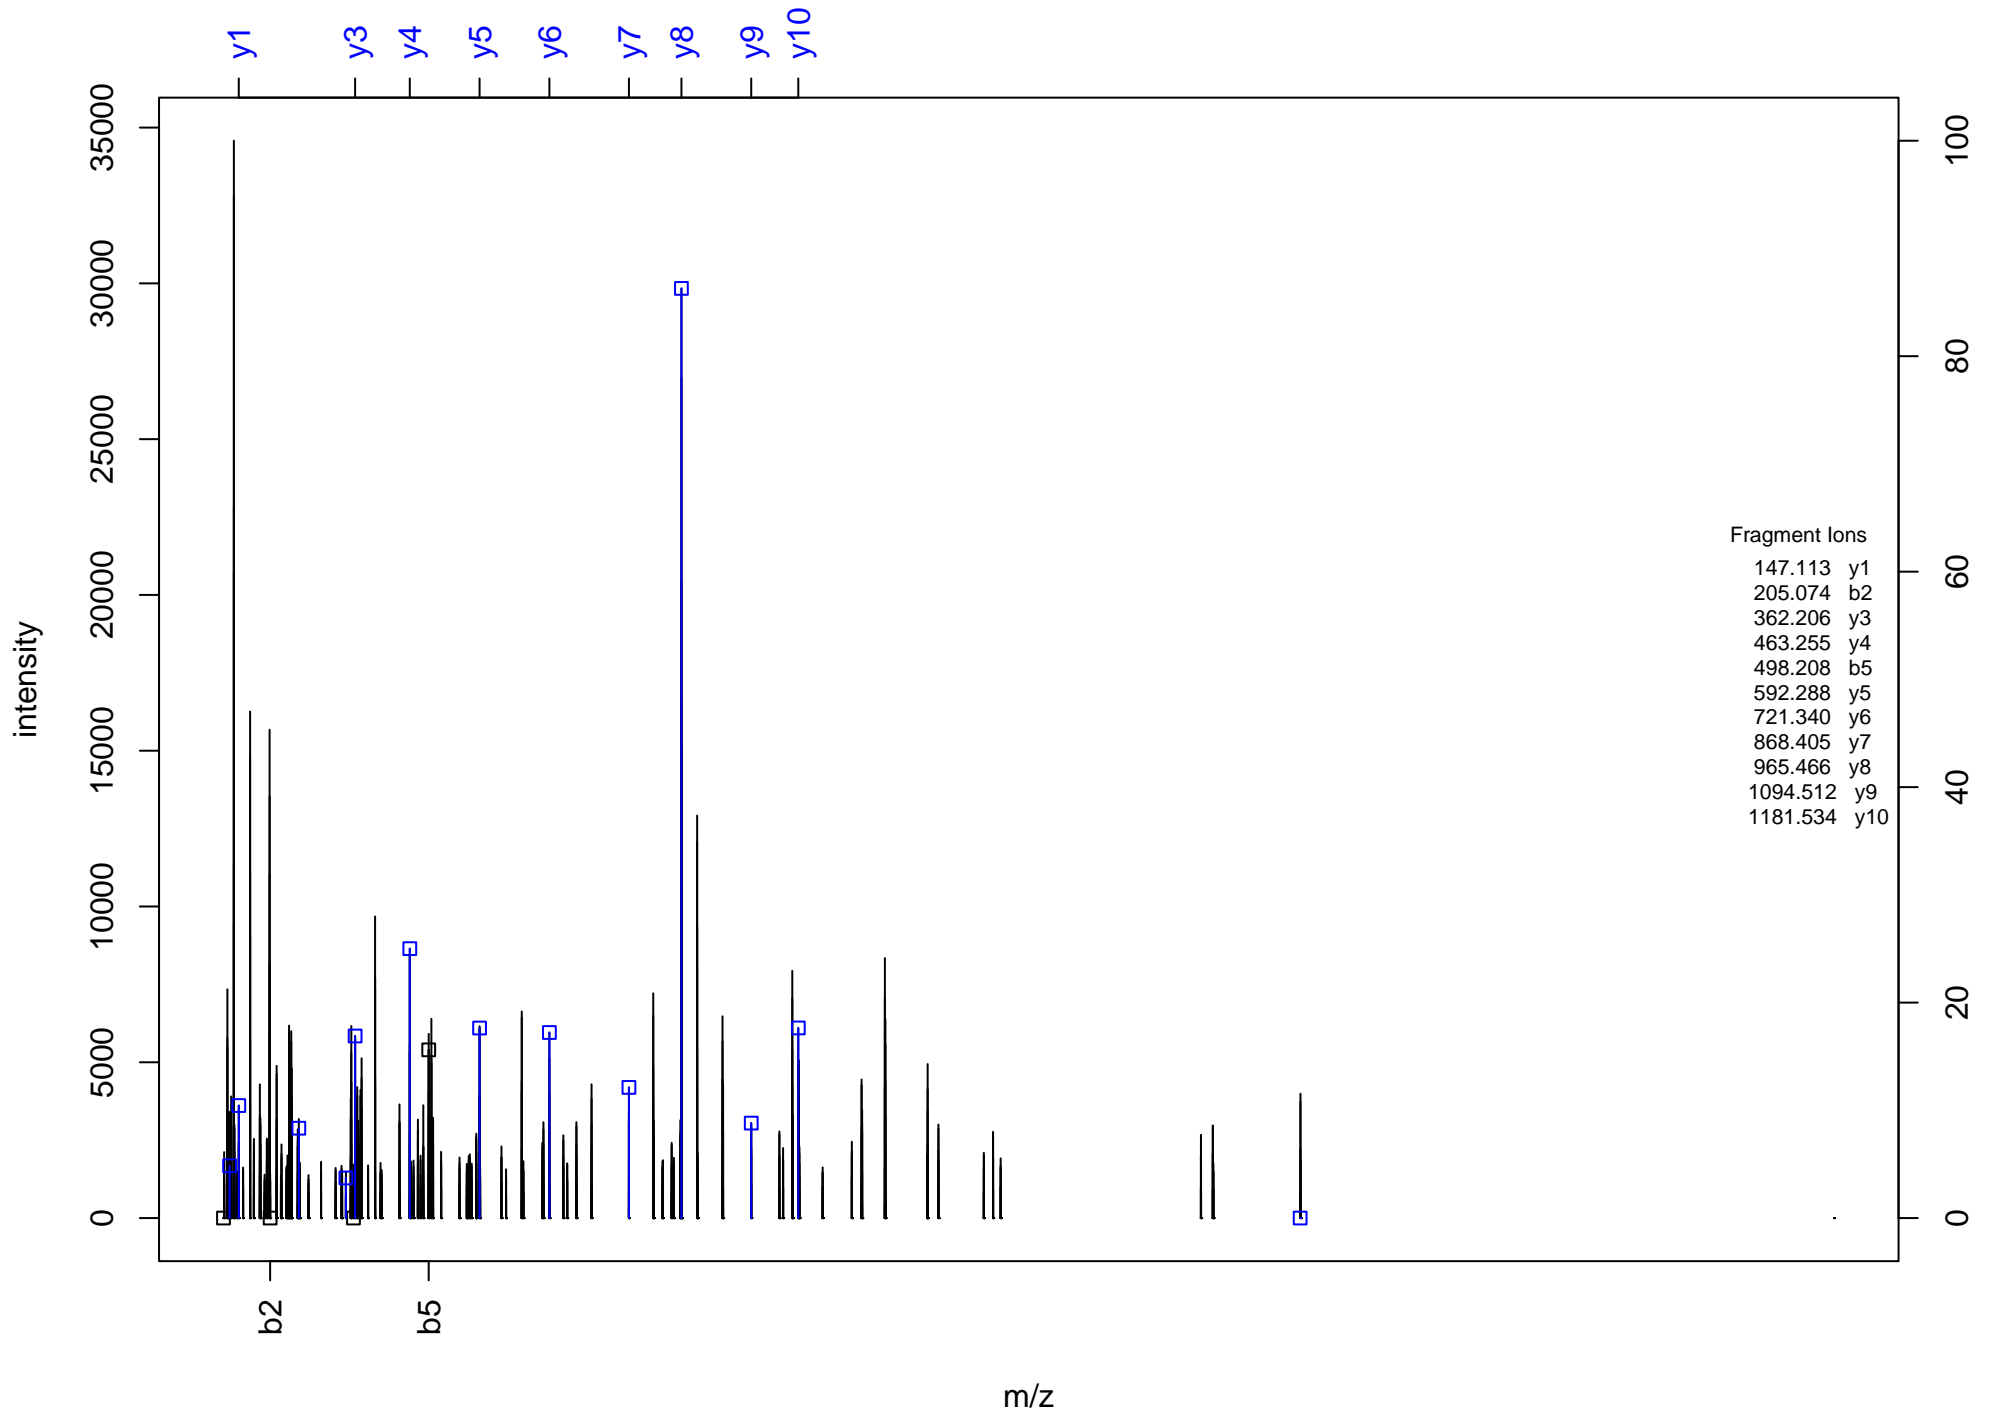

# VGISLLSSPHP

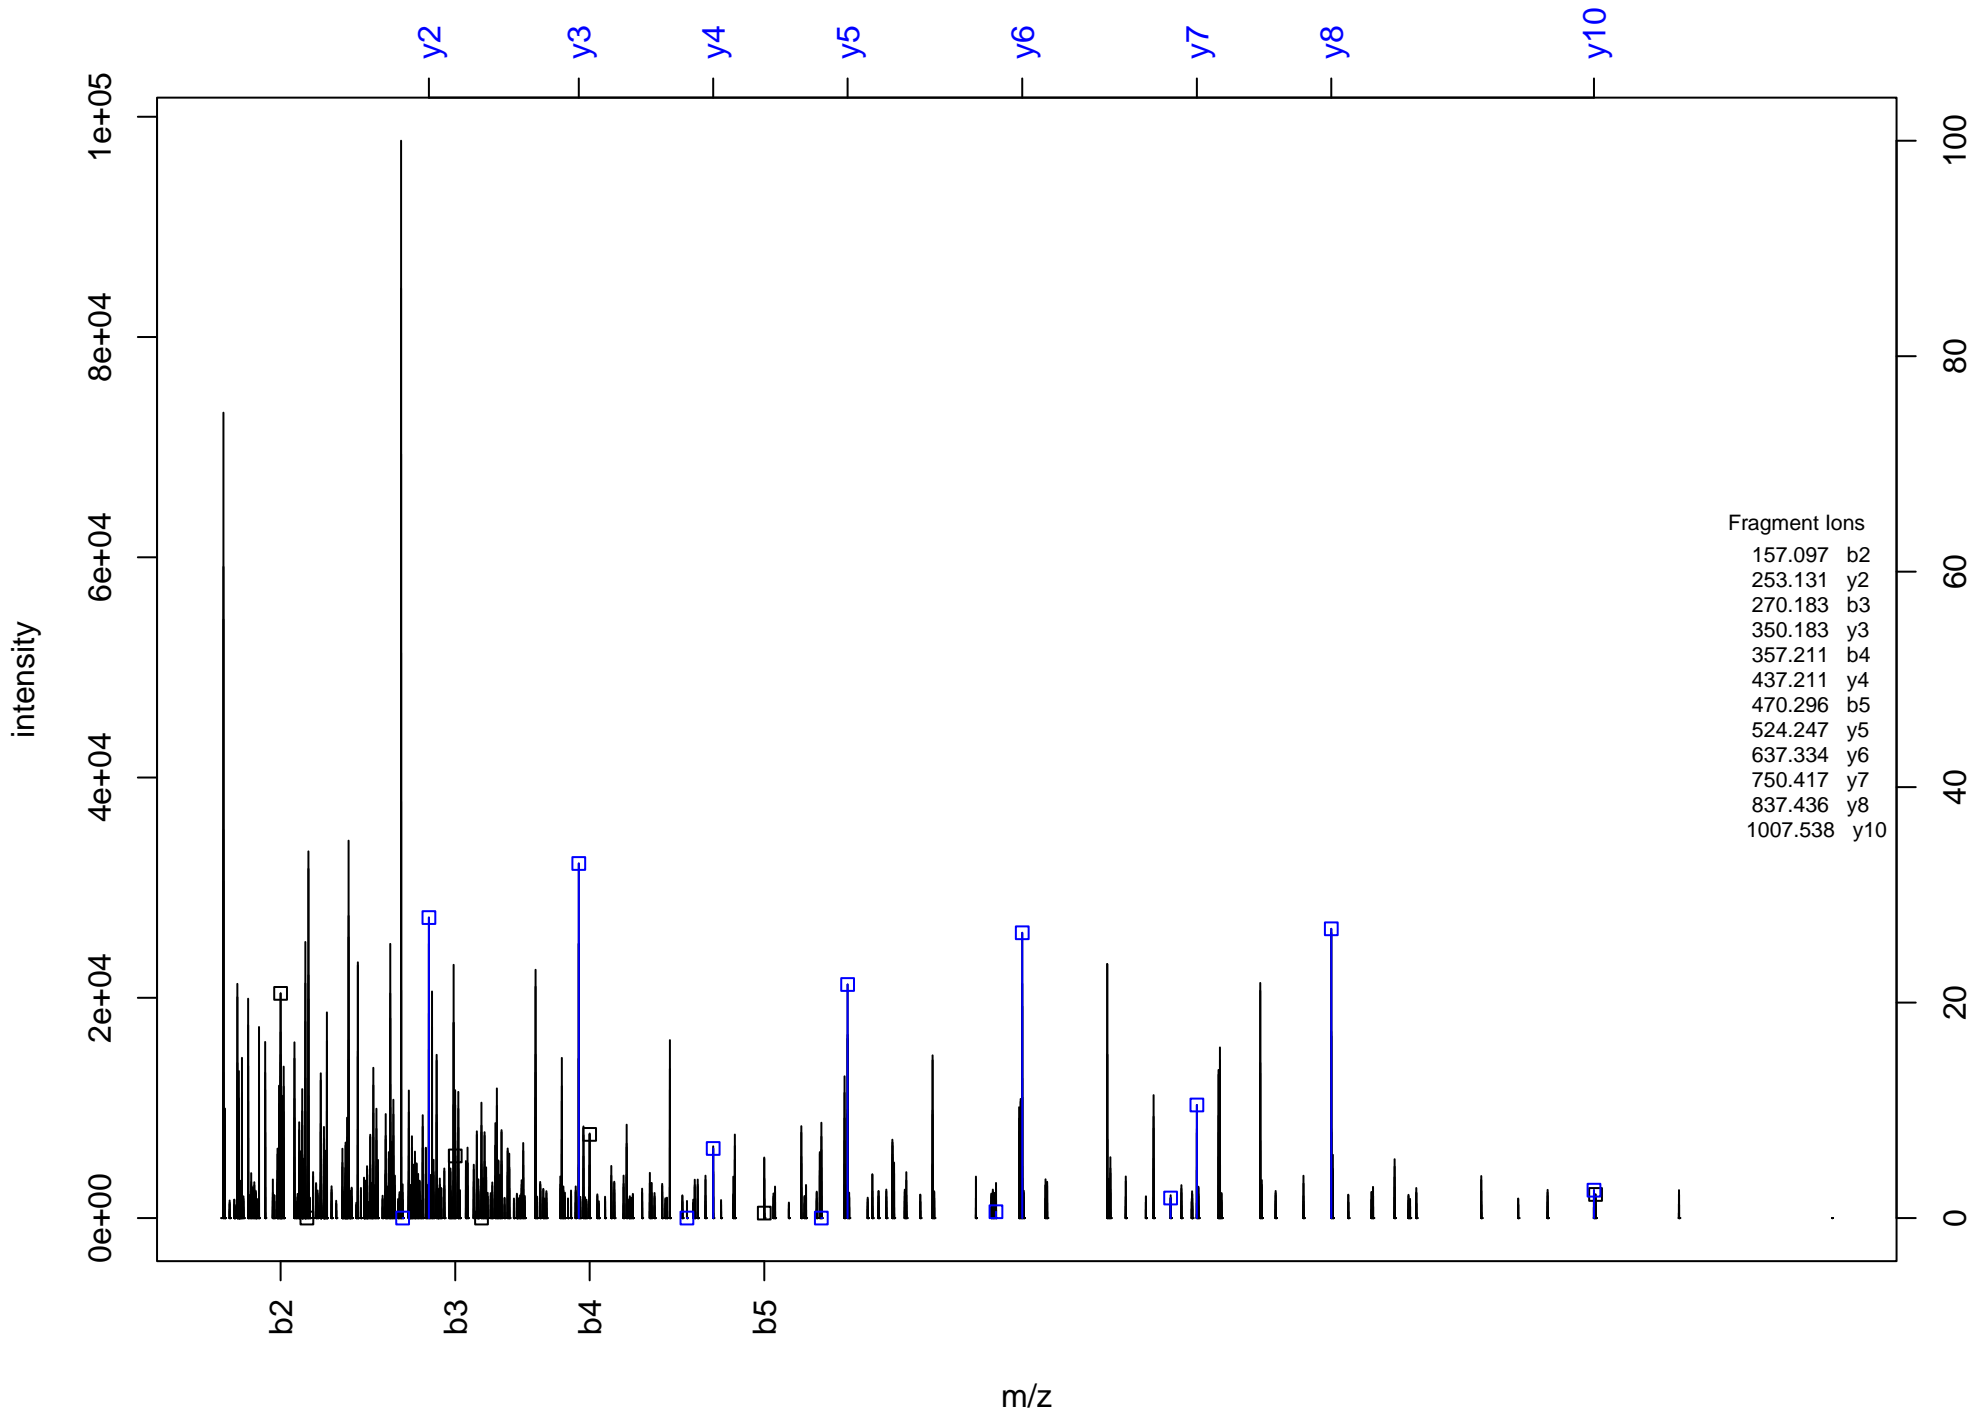

# VLEQPIVVQSVGTDGR

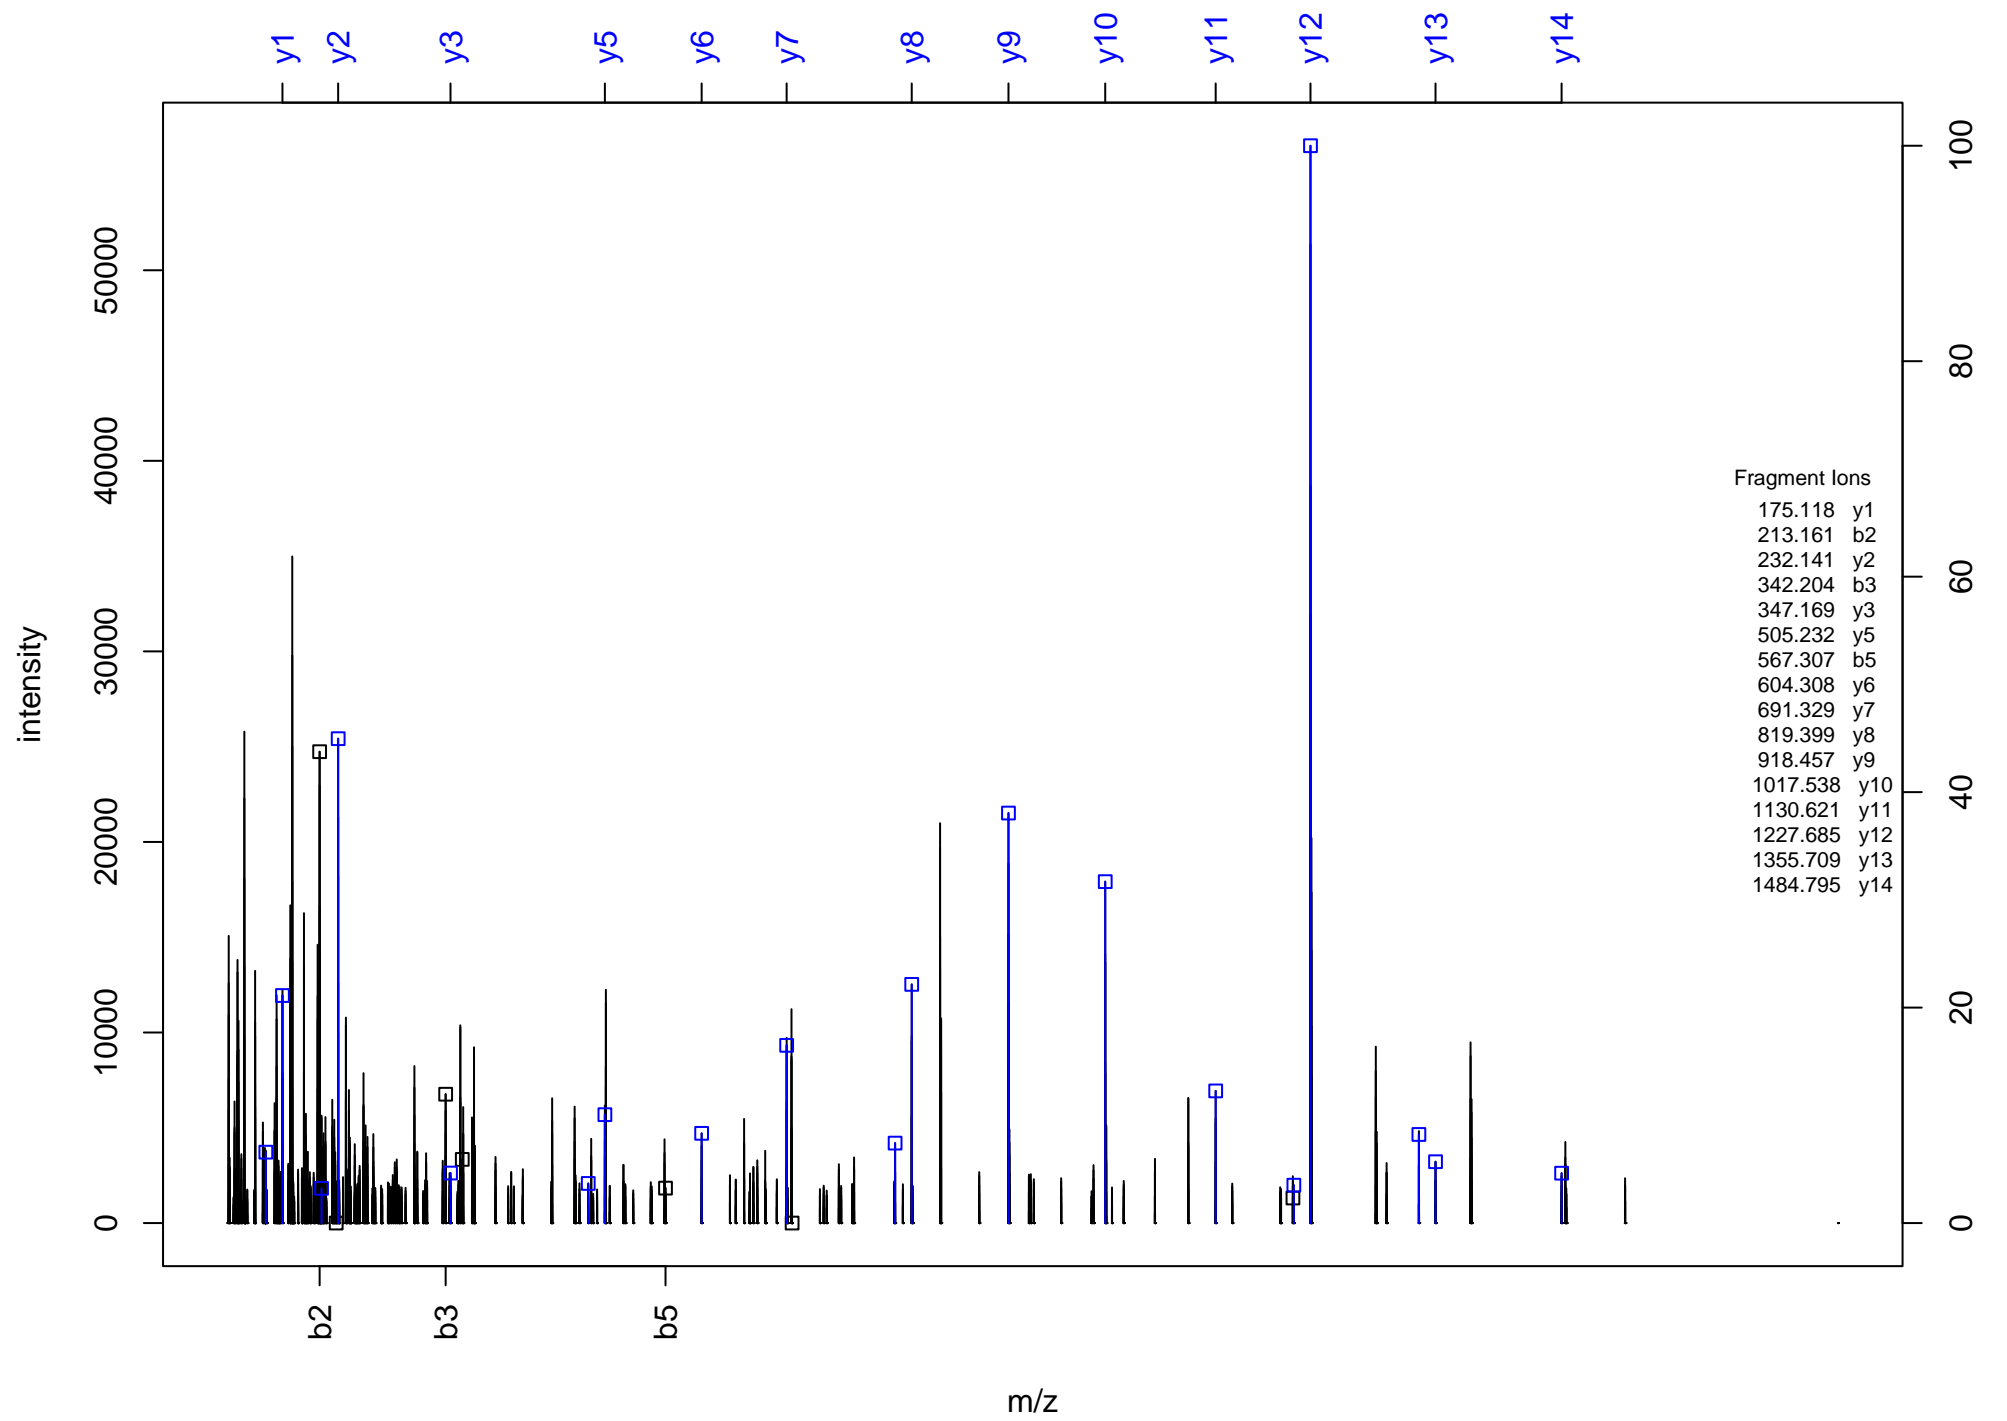



# GLITFESLEK

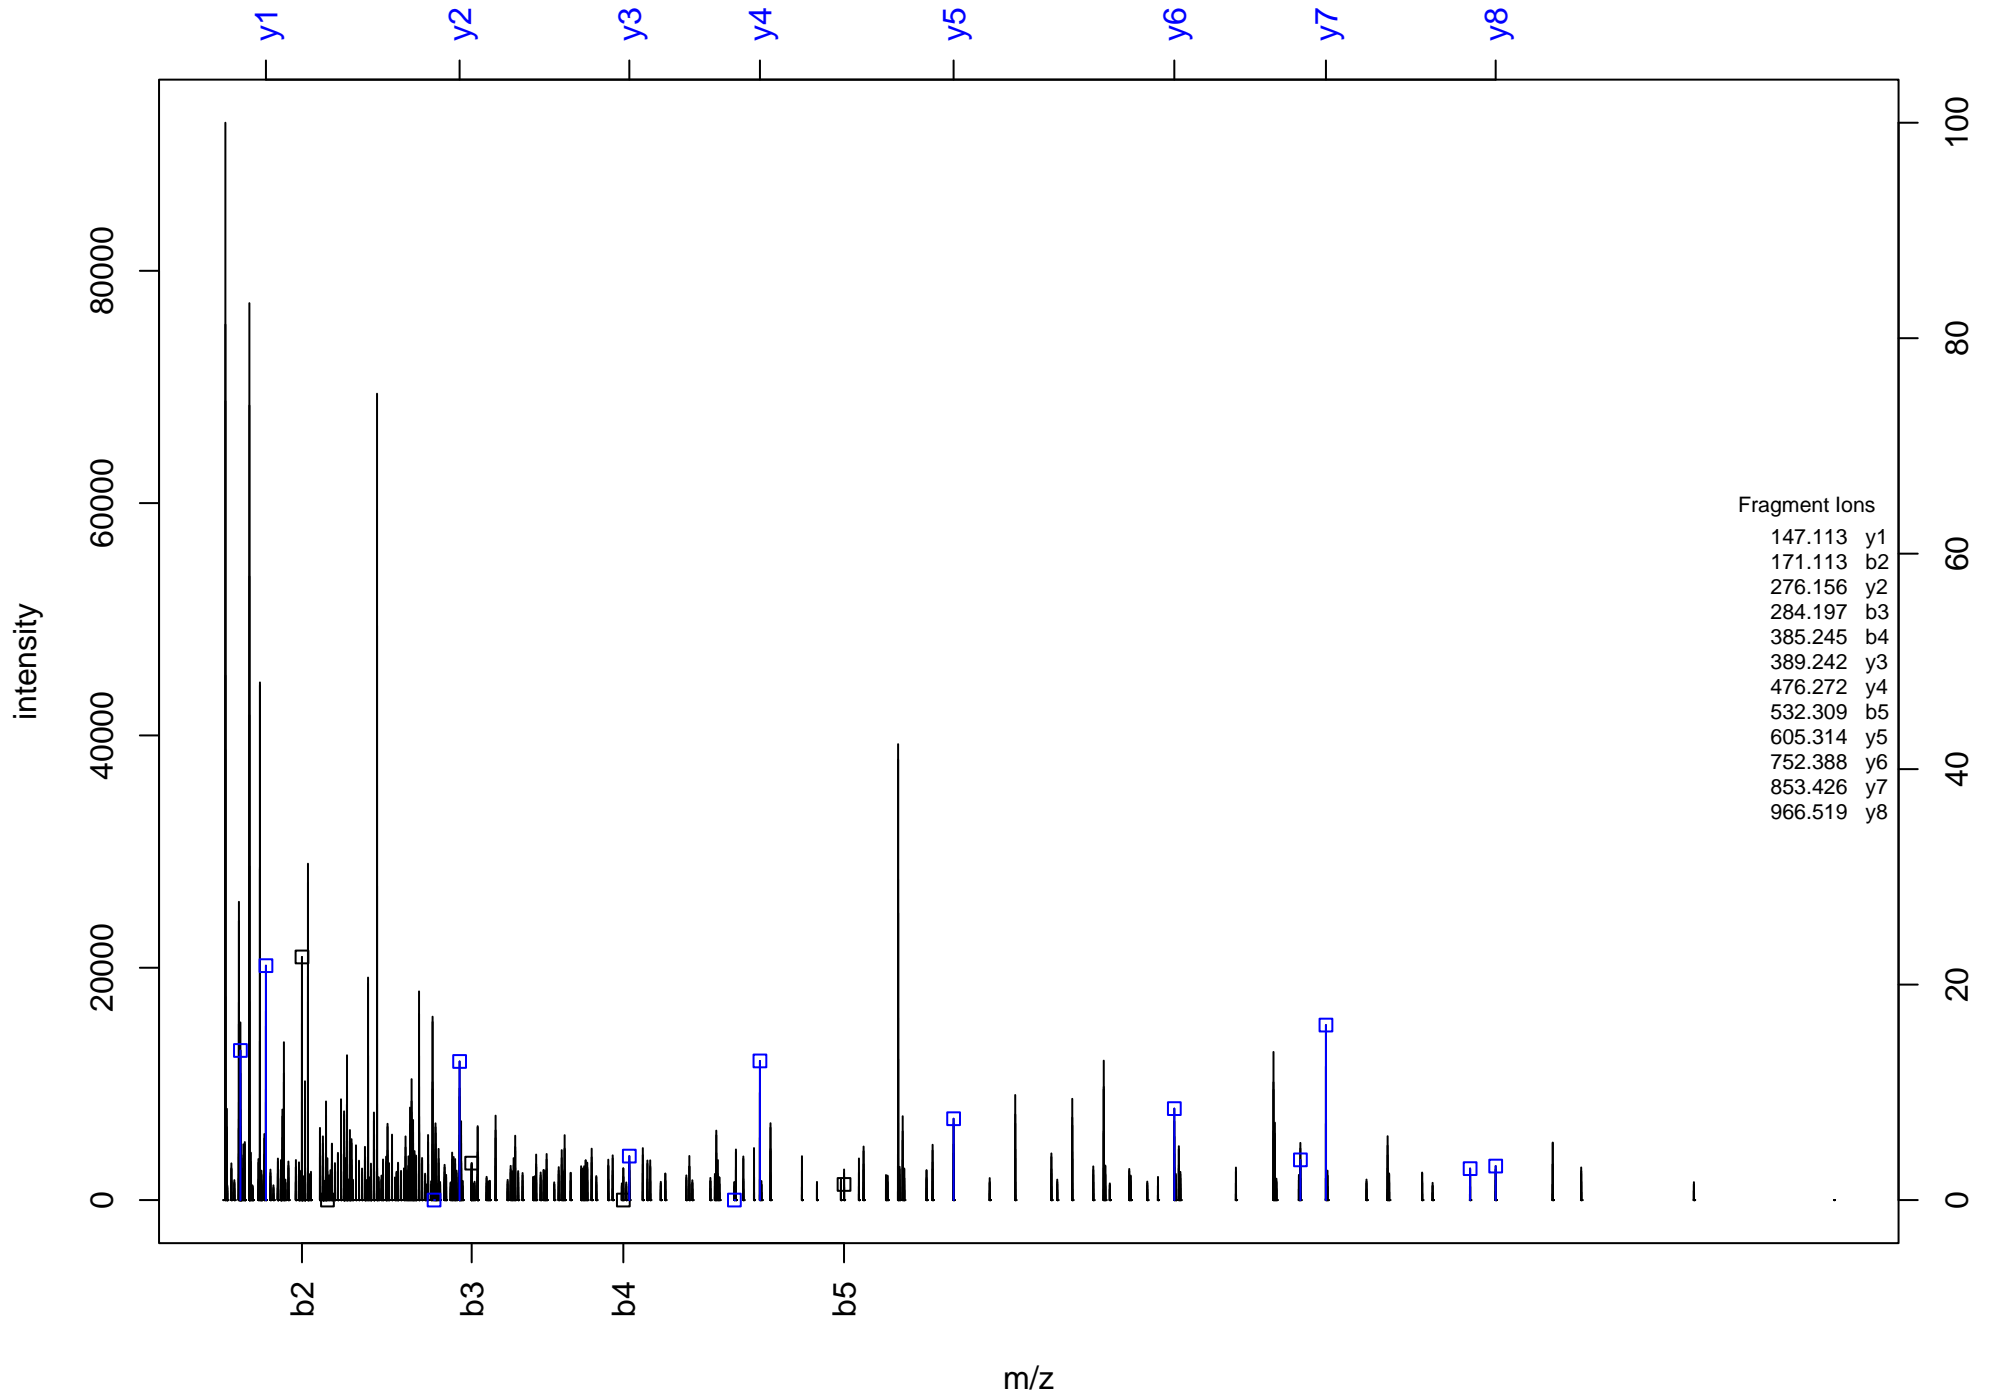

# DAFLGQDLPYTEETLDEIAK

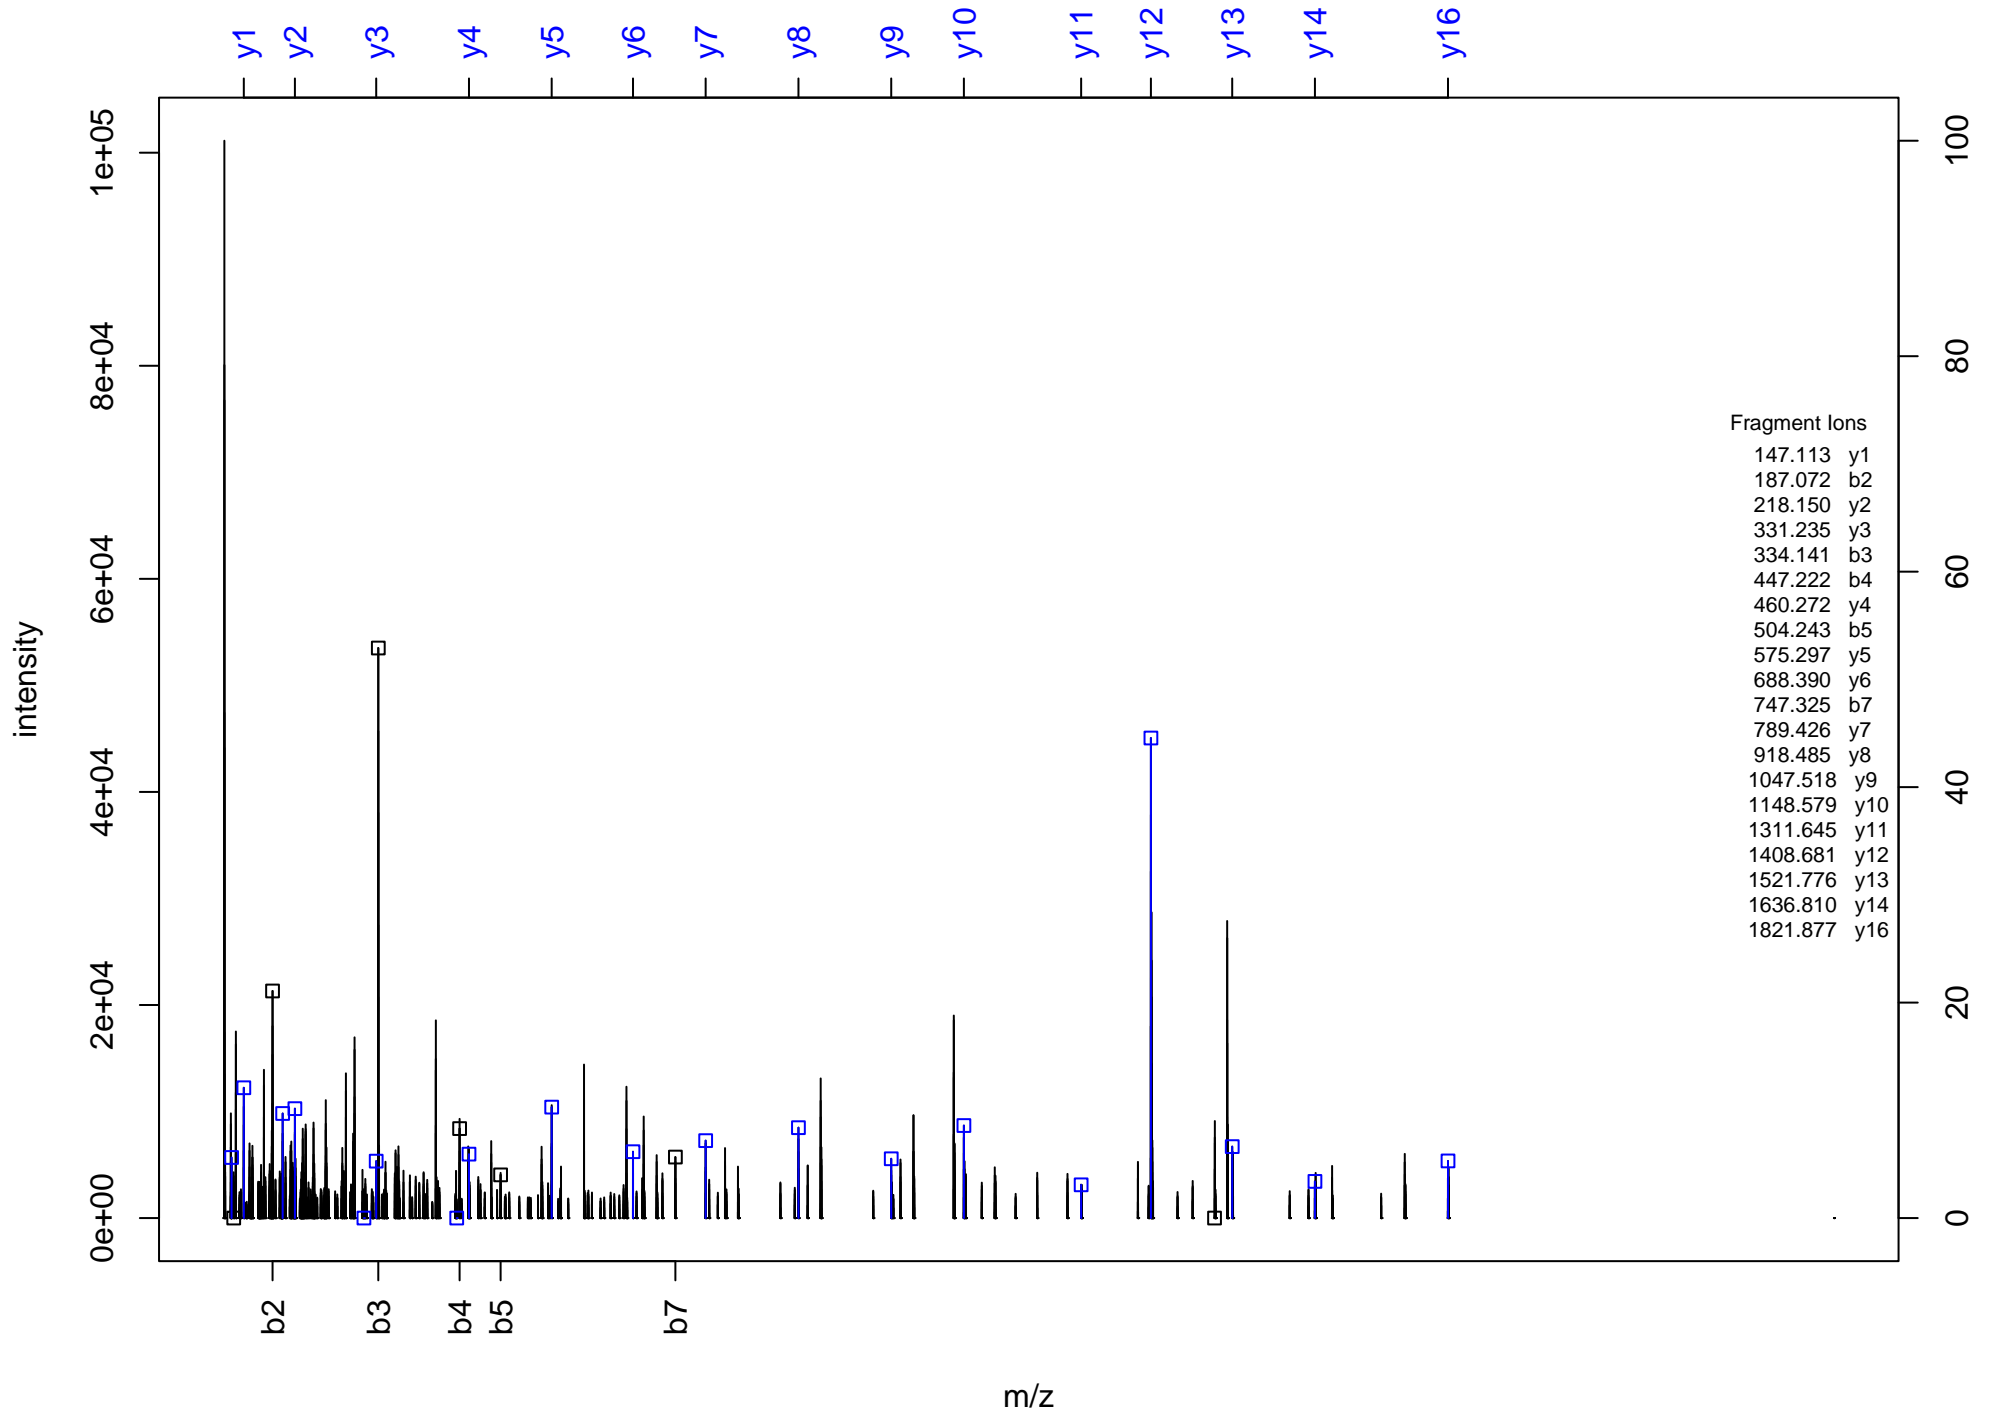

# ALDDFVLGSAR

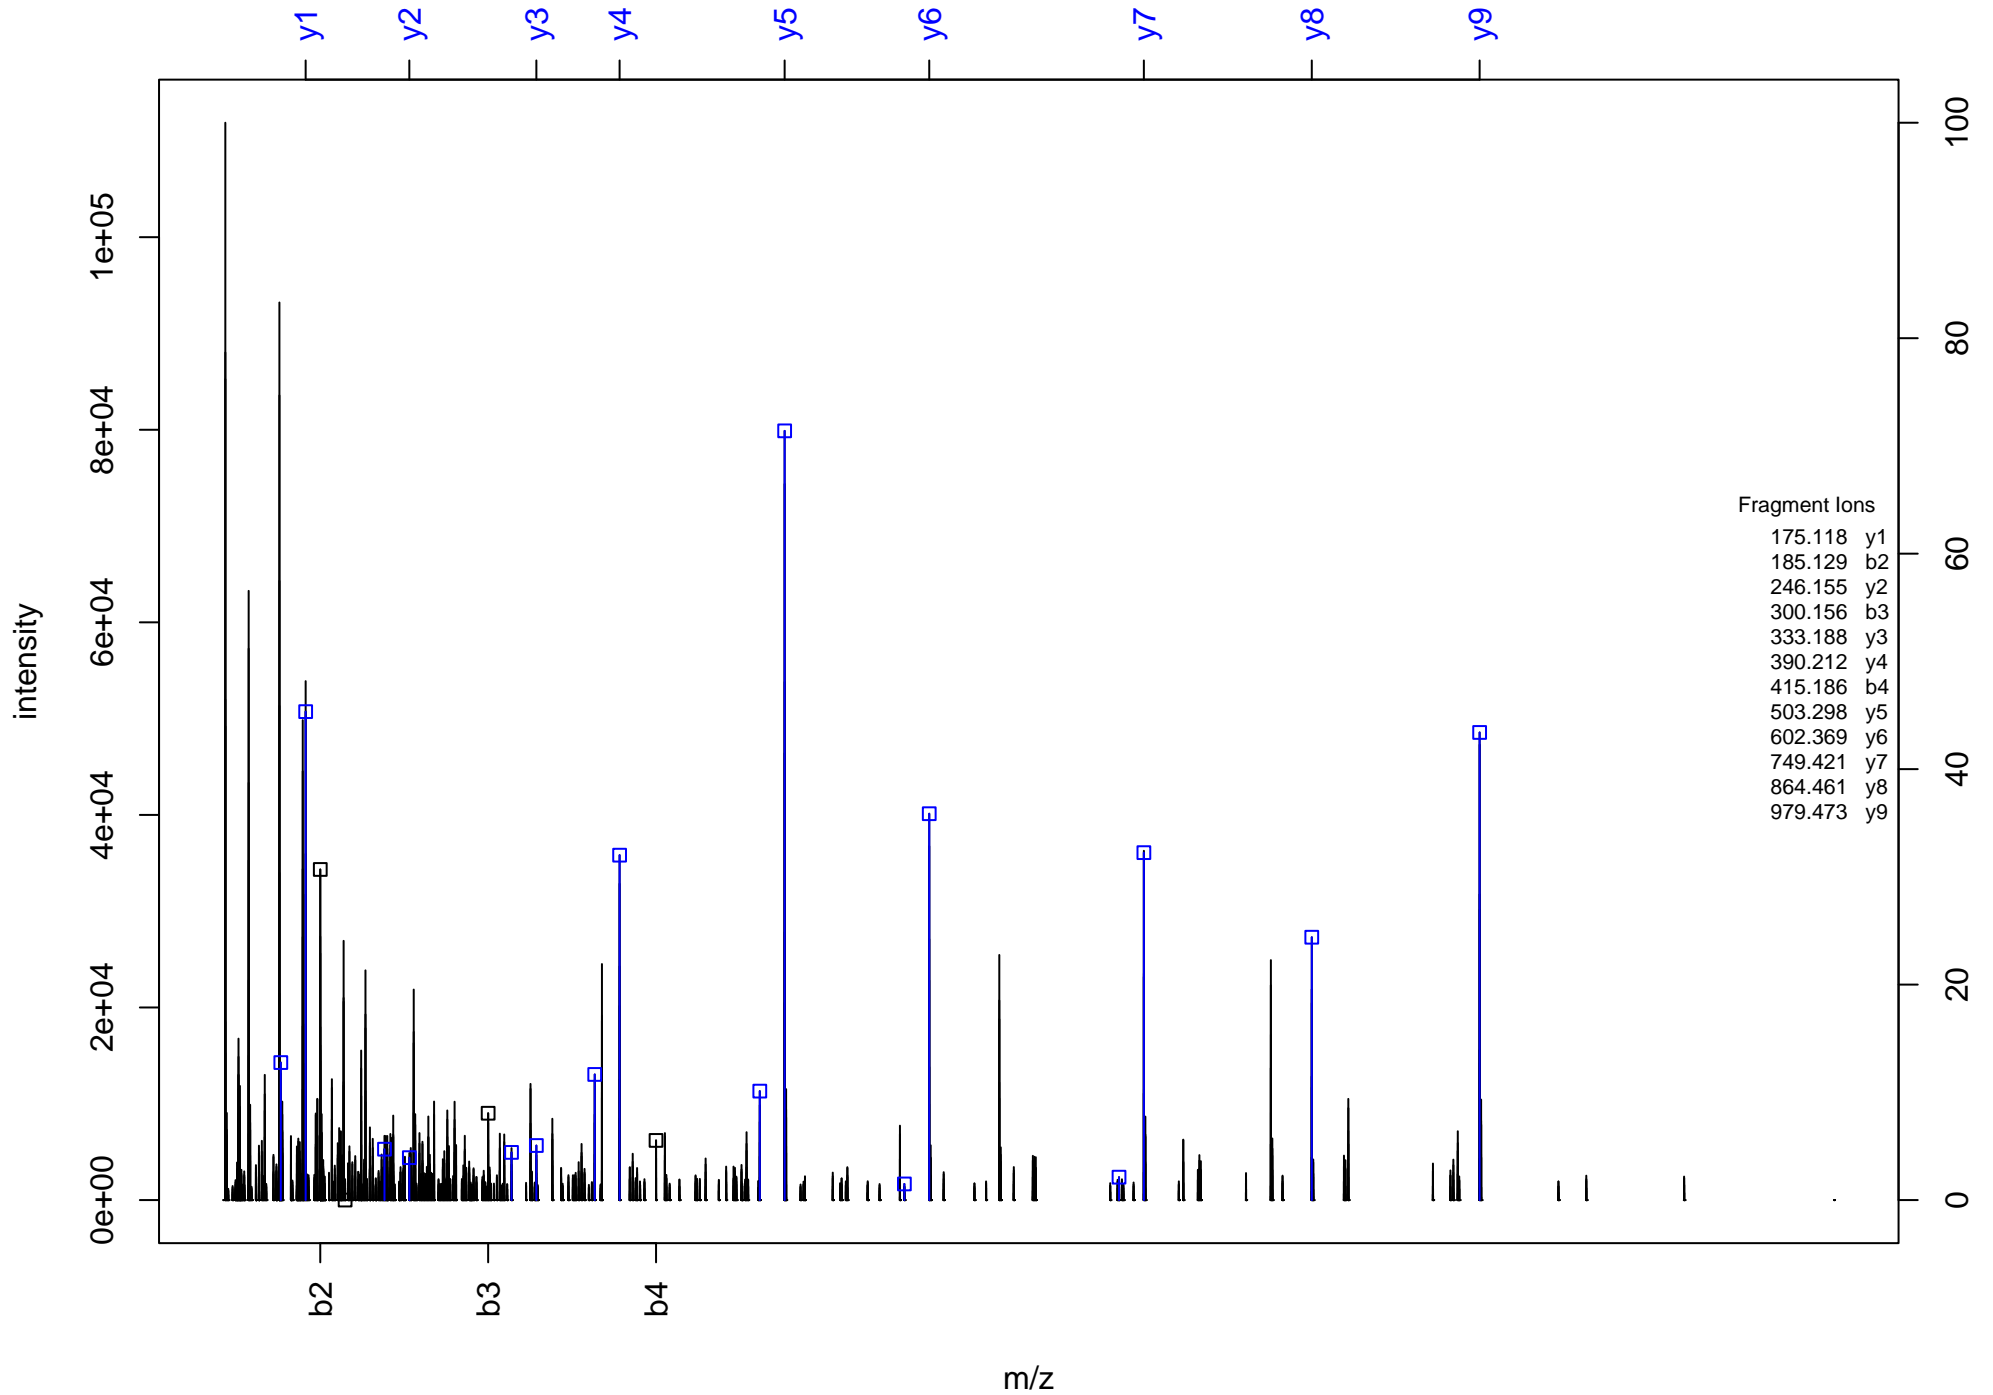

# ANPYECGFDPTSSAR

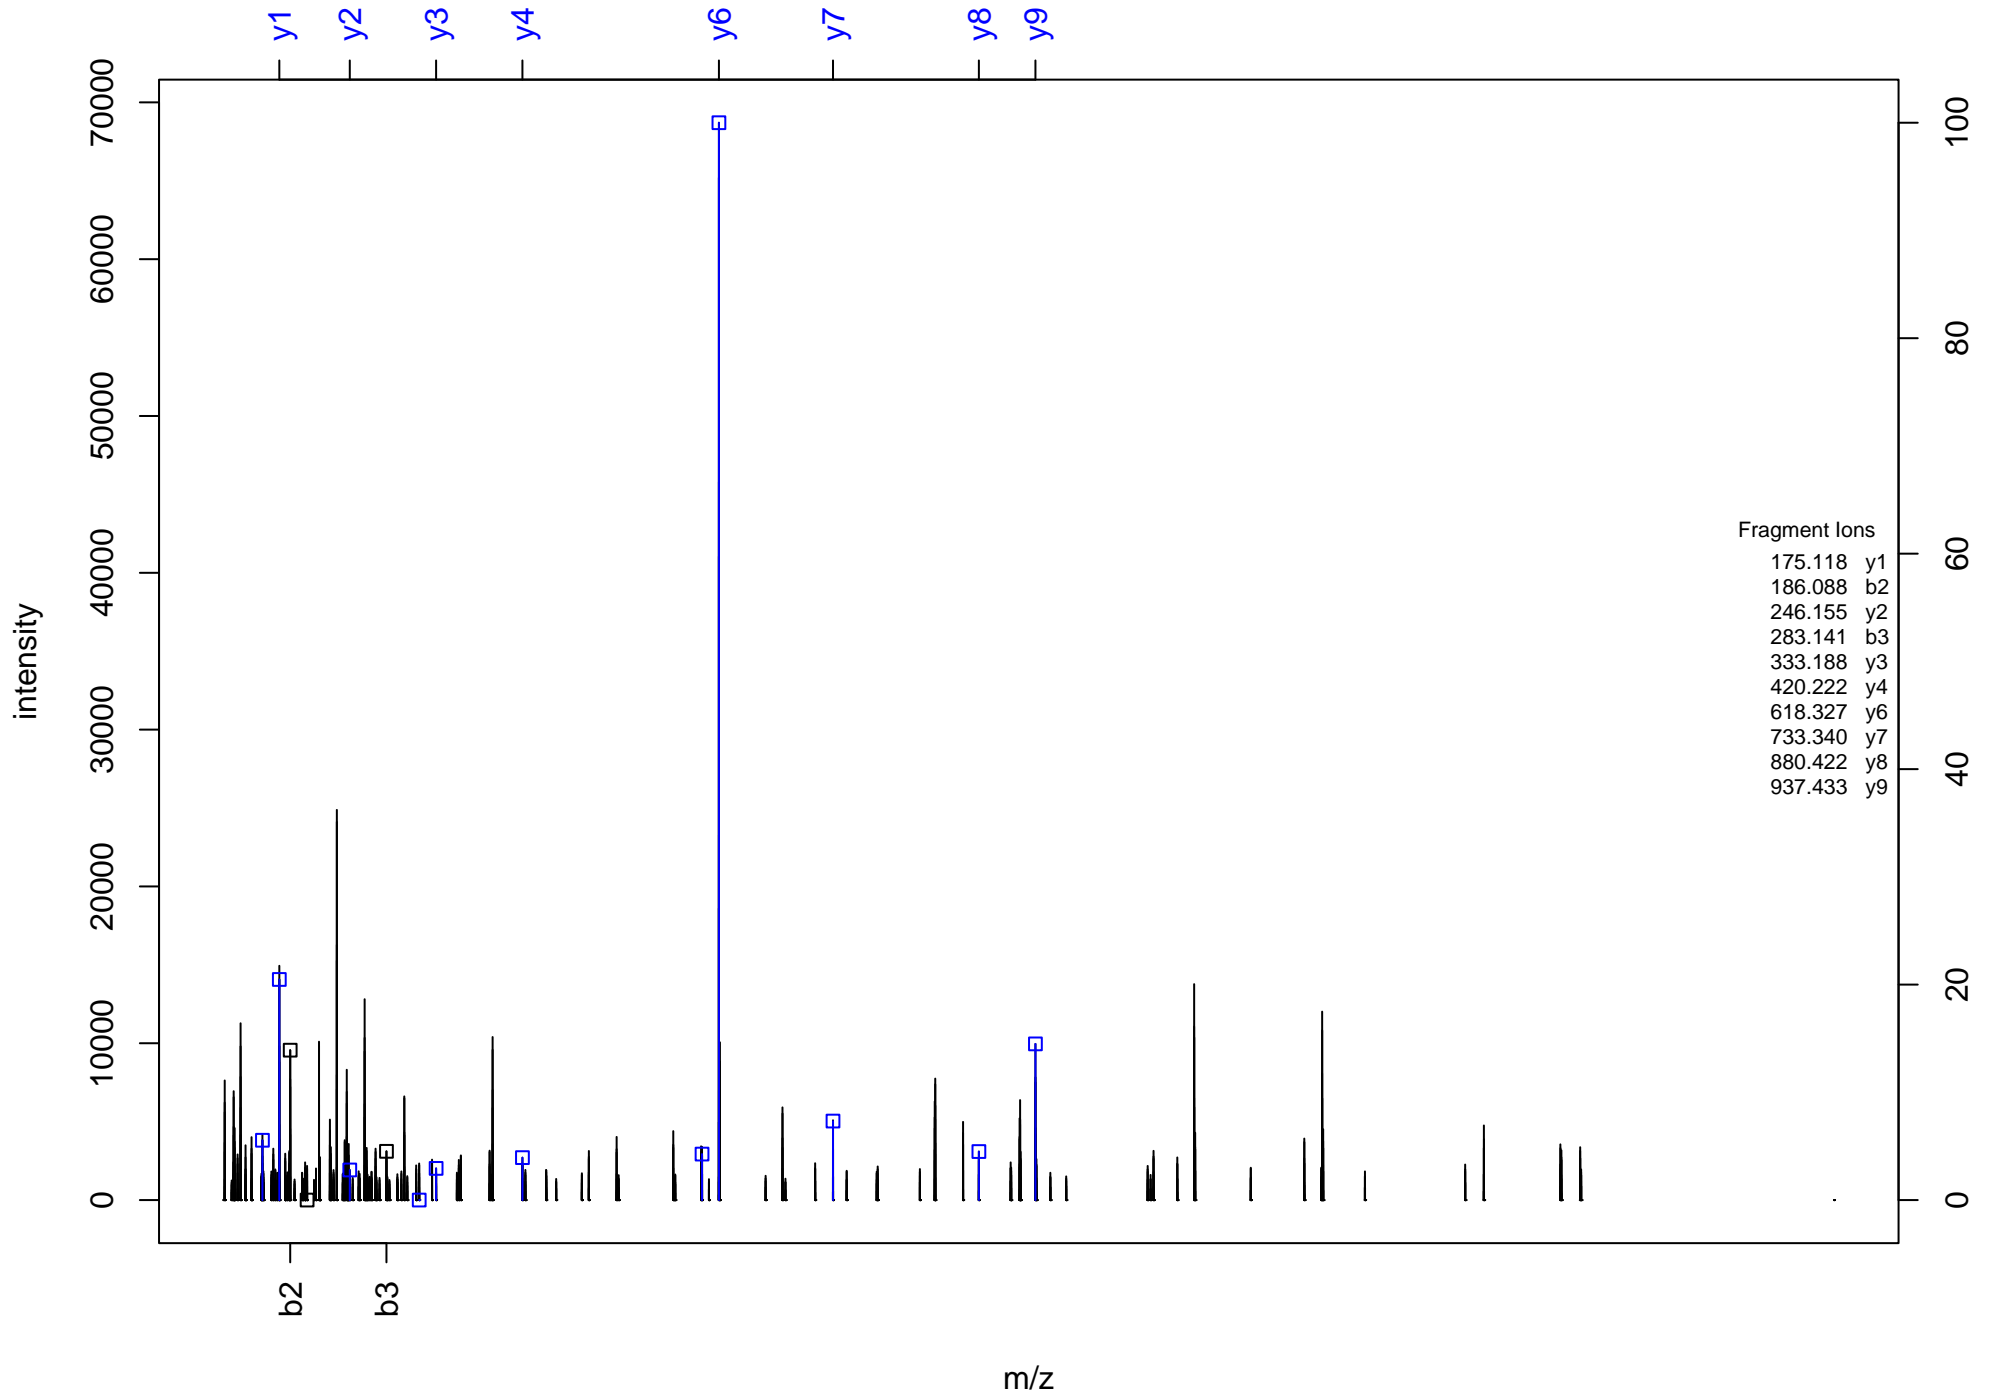

# FILLACDGLFK

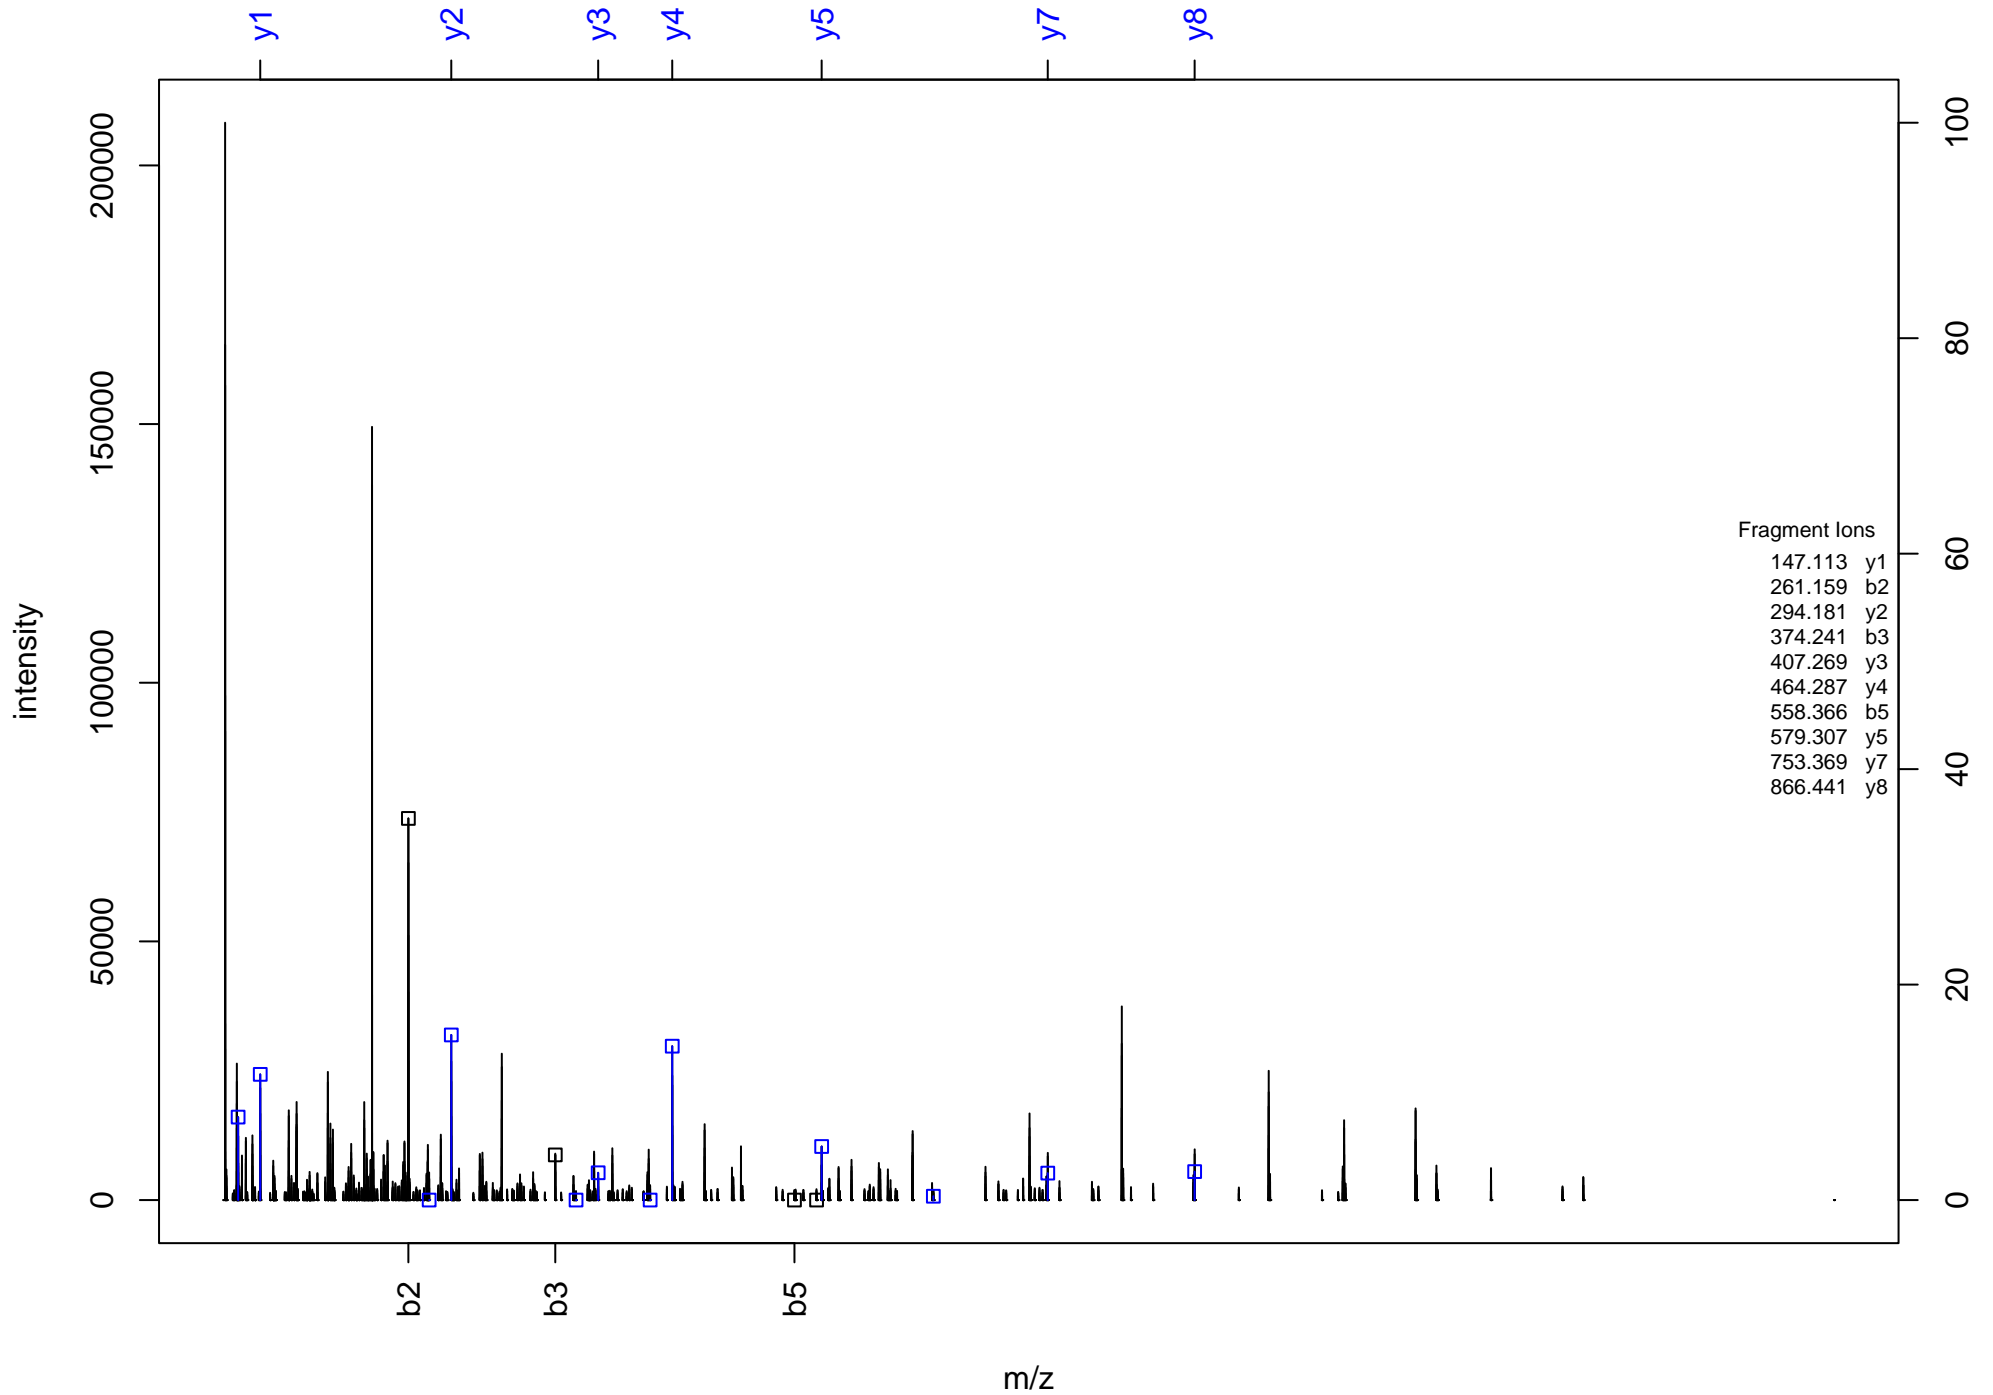

# Q<sup>+</sup>ITLPGN<sup>+</sup>KLLSLQ<sup>+</sup>AQR

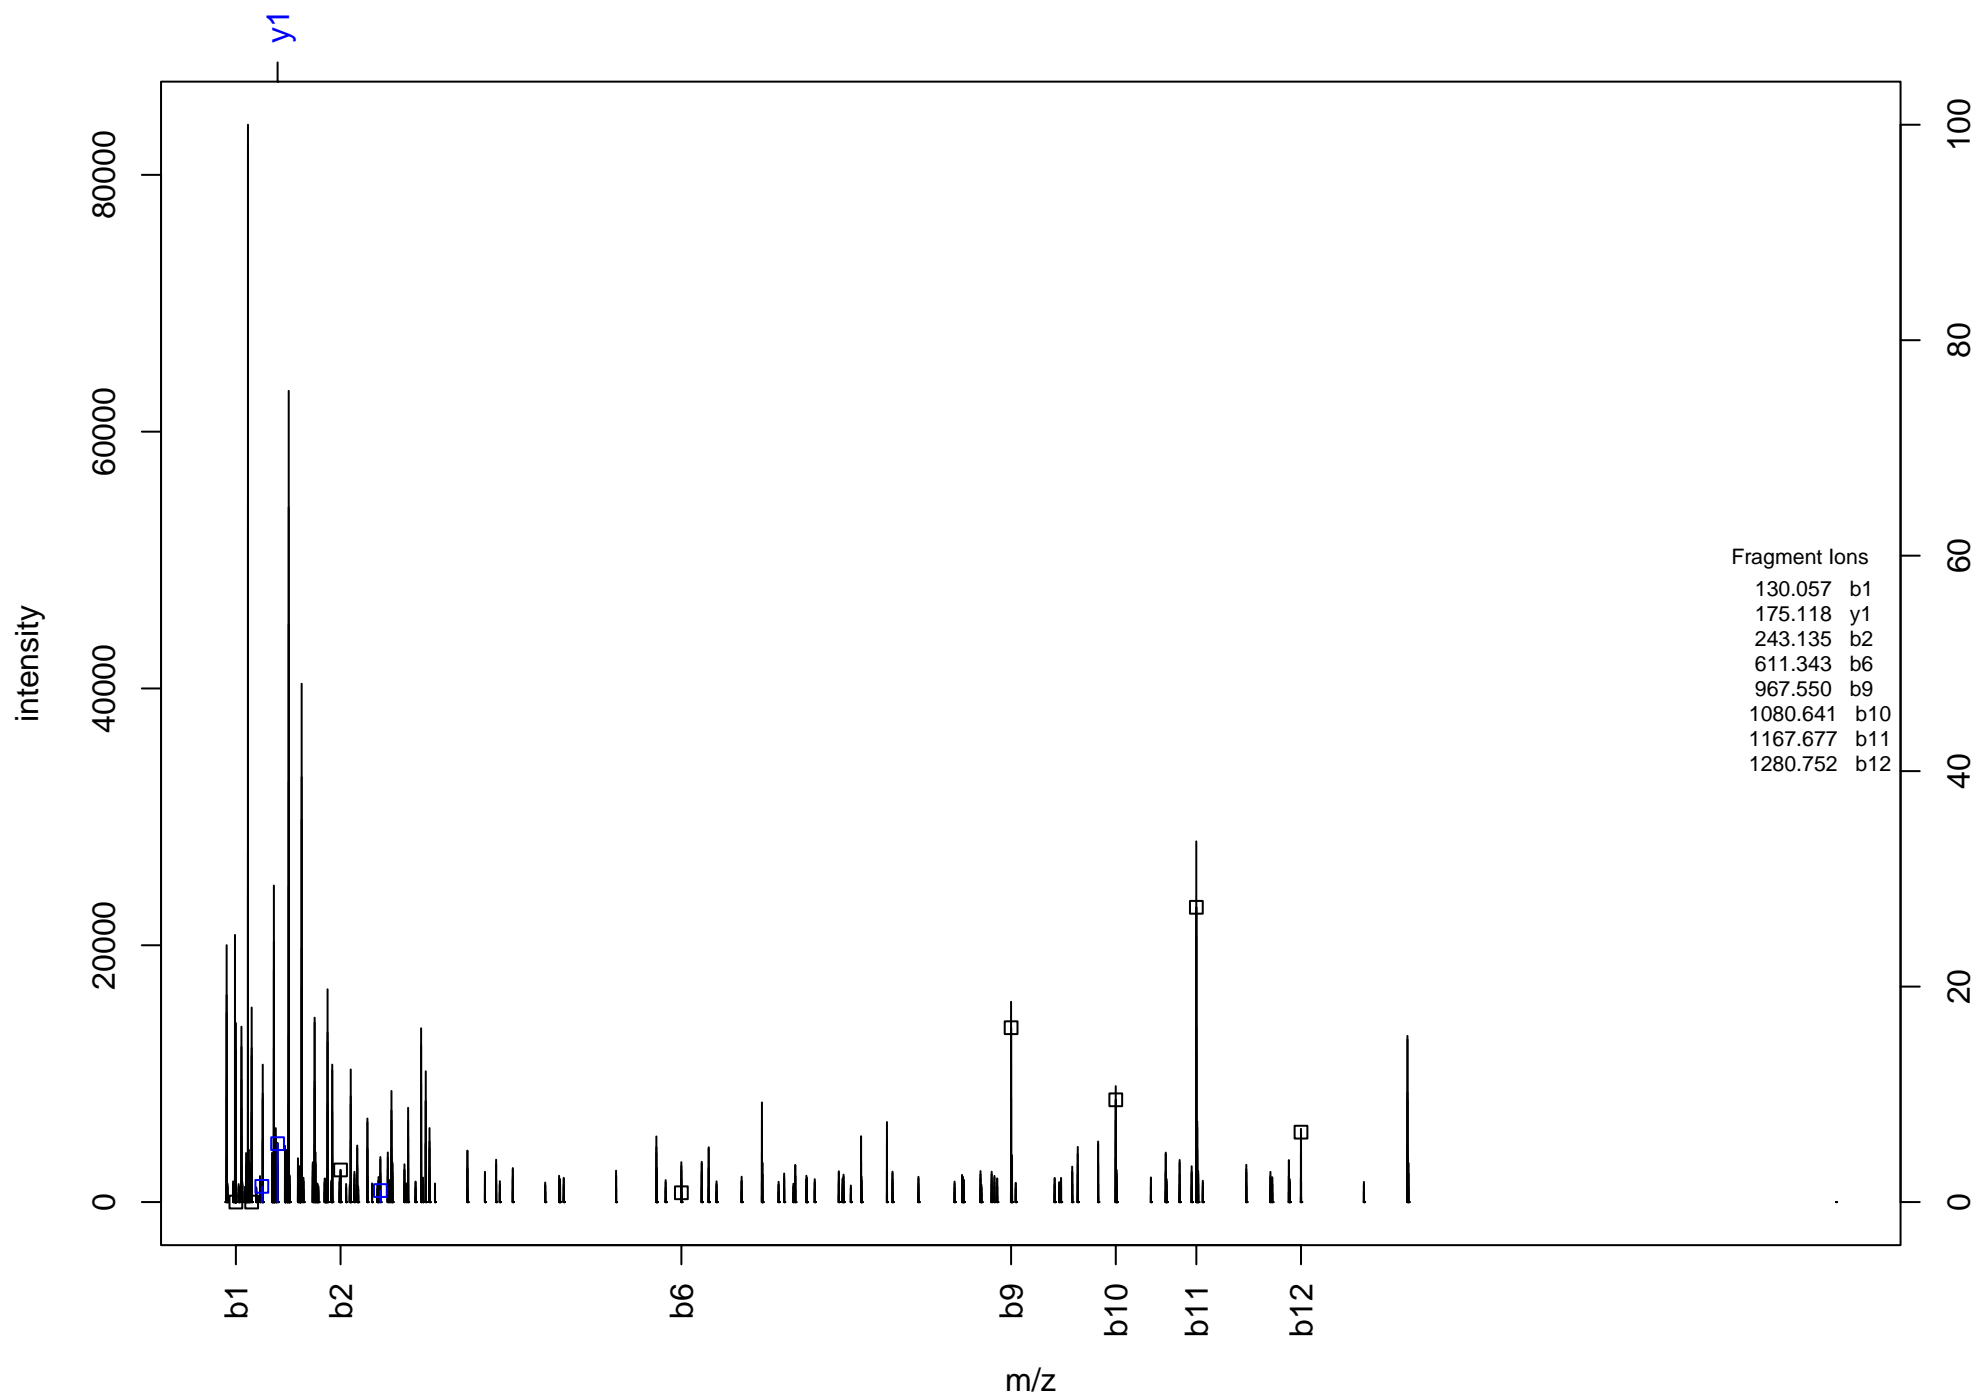

# TVEPYVTWGFPNLK

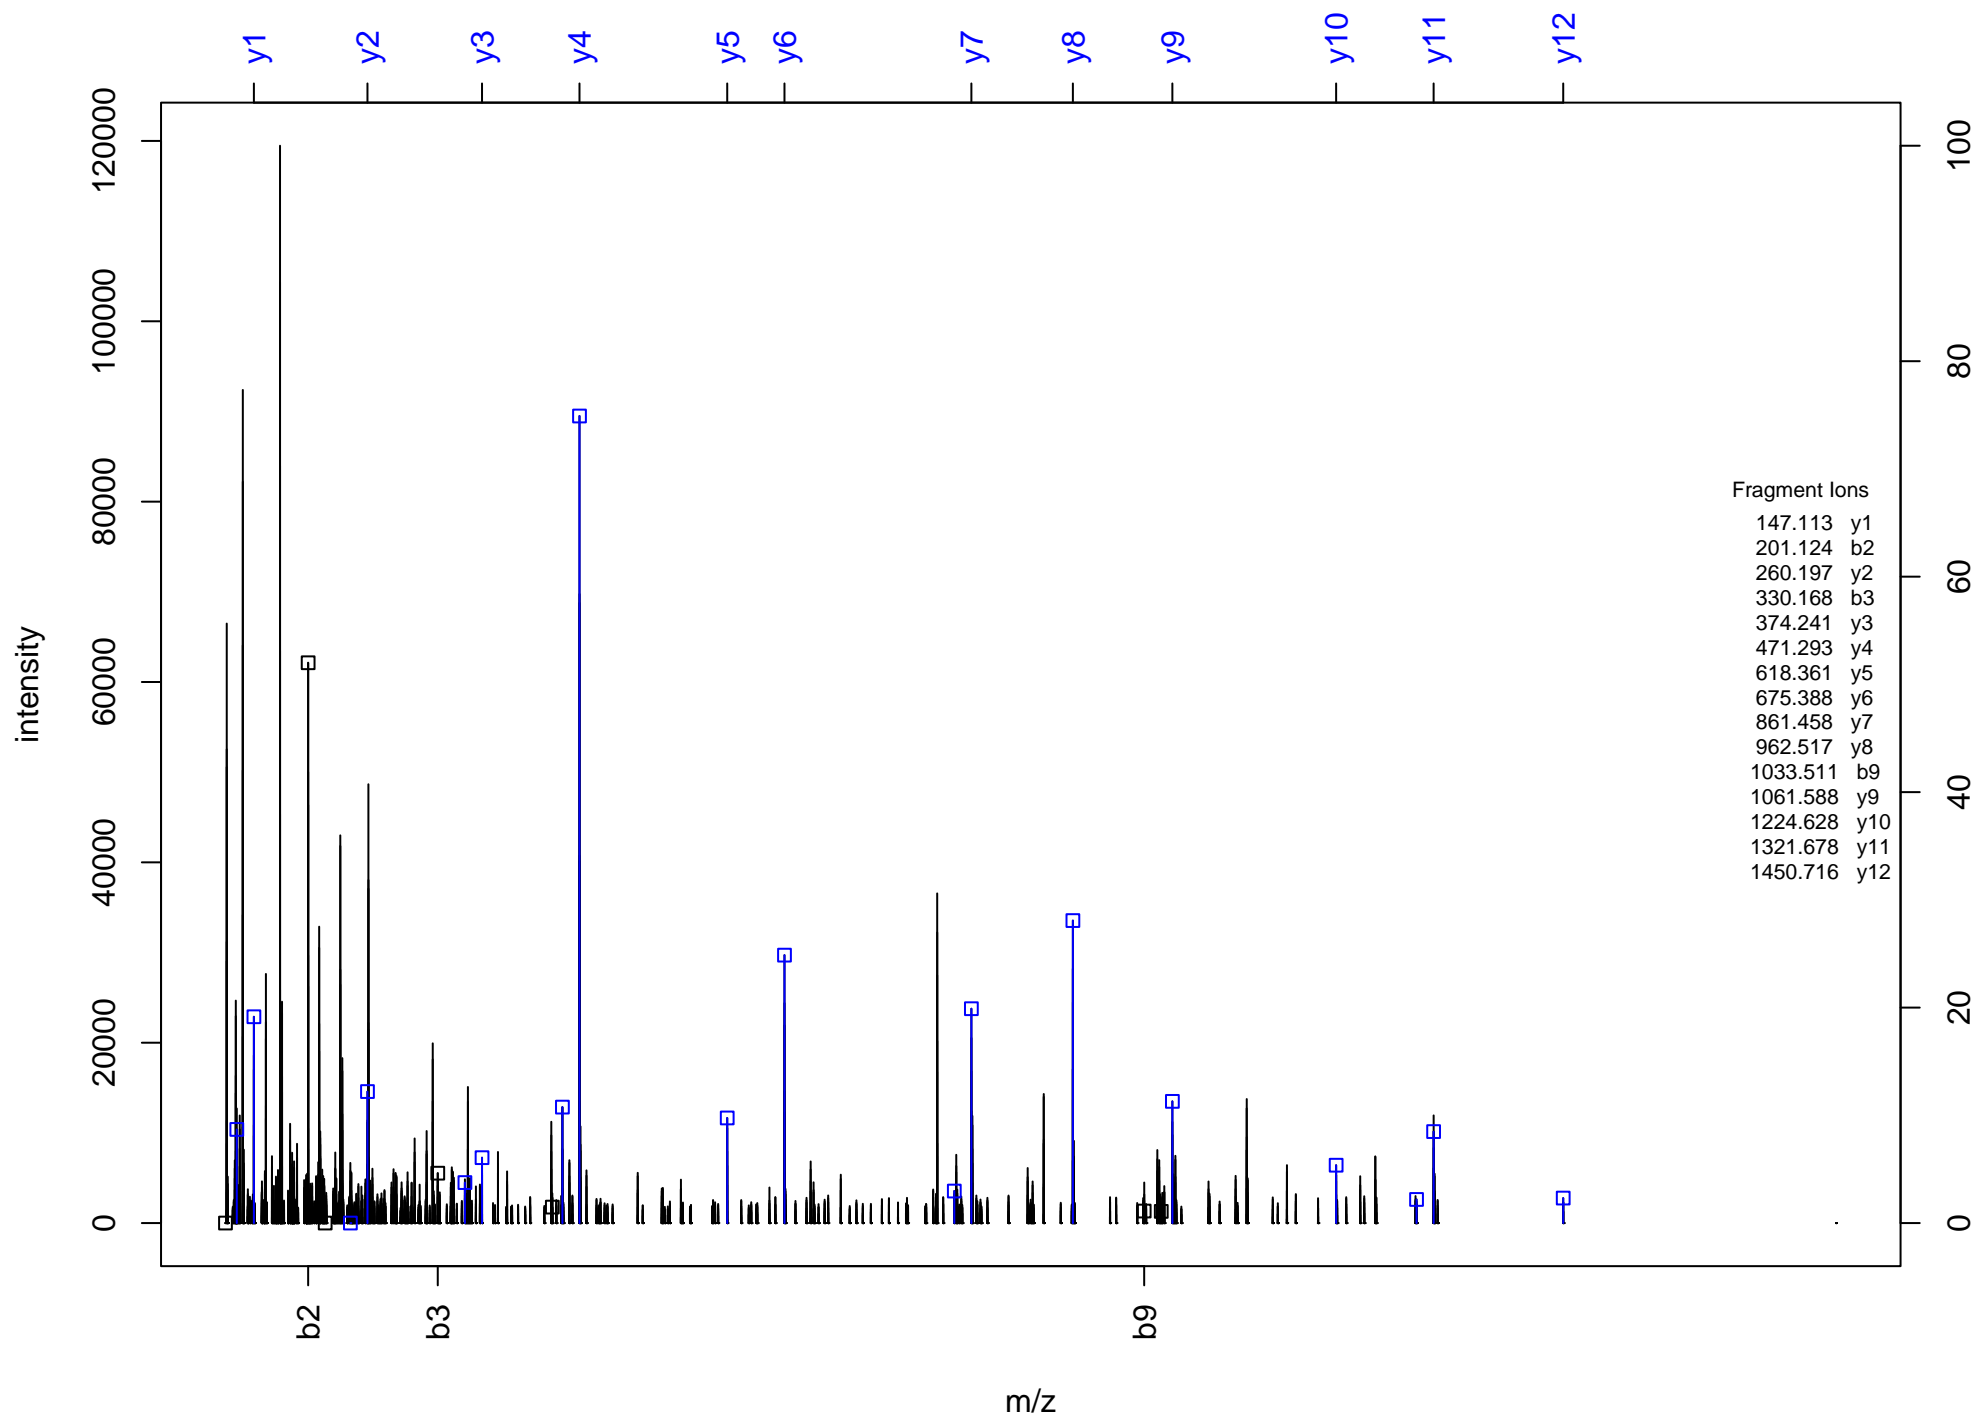

# FIISFSR

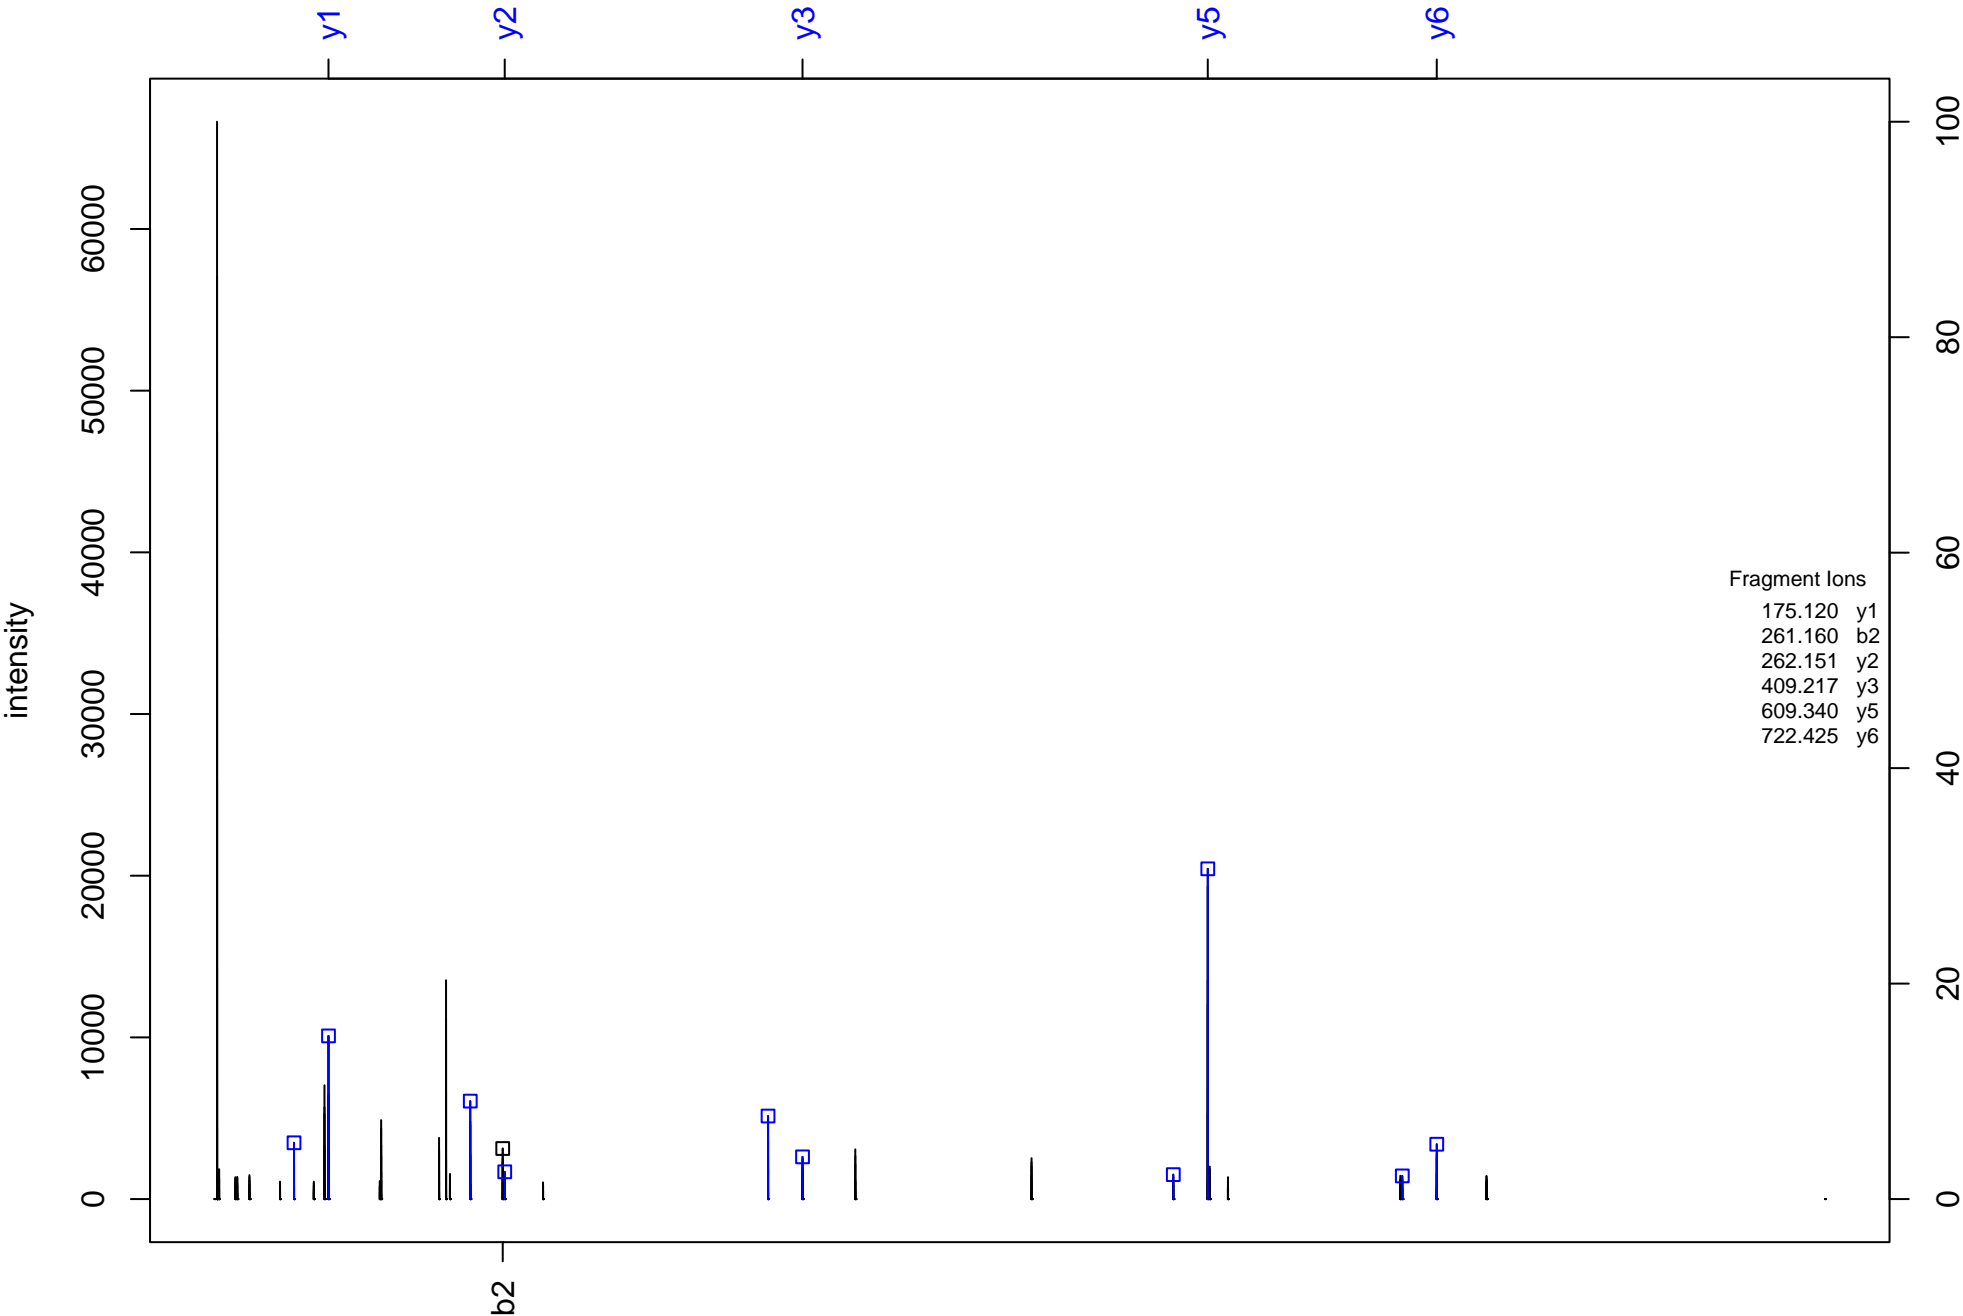



# ESVFALDFLR

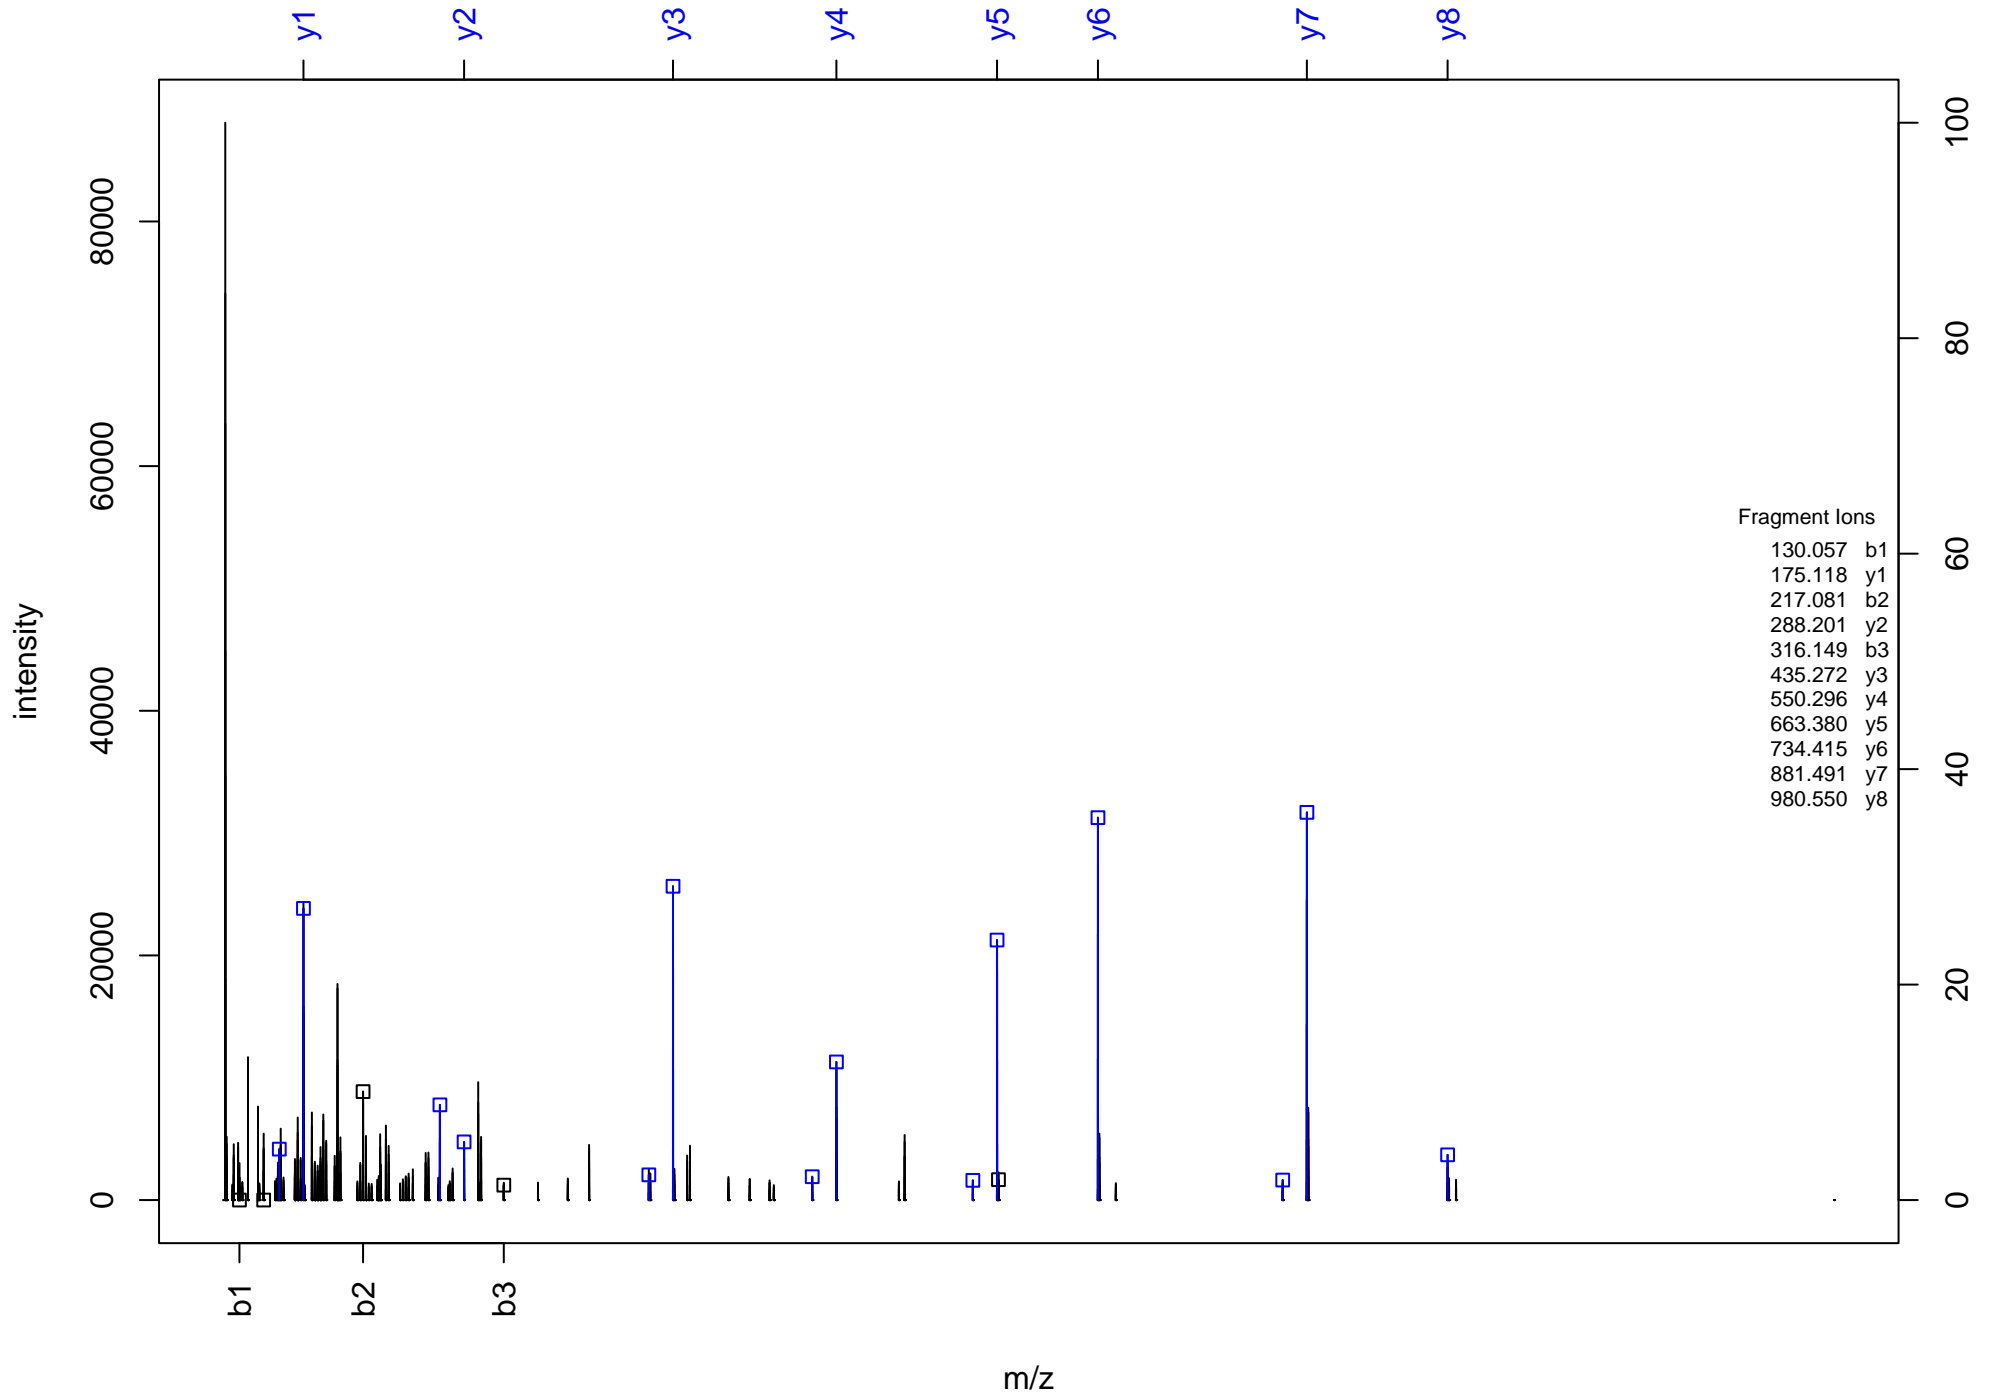

# (Ac)N<sup>^</sup>SVVSSNRSQVWN<sup>^</sup>EGNR

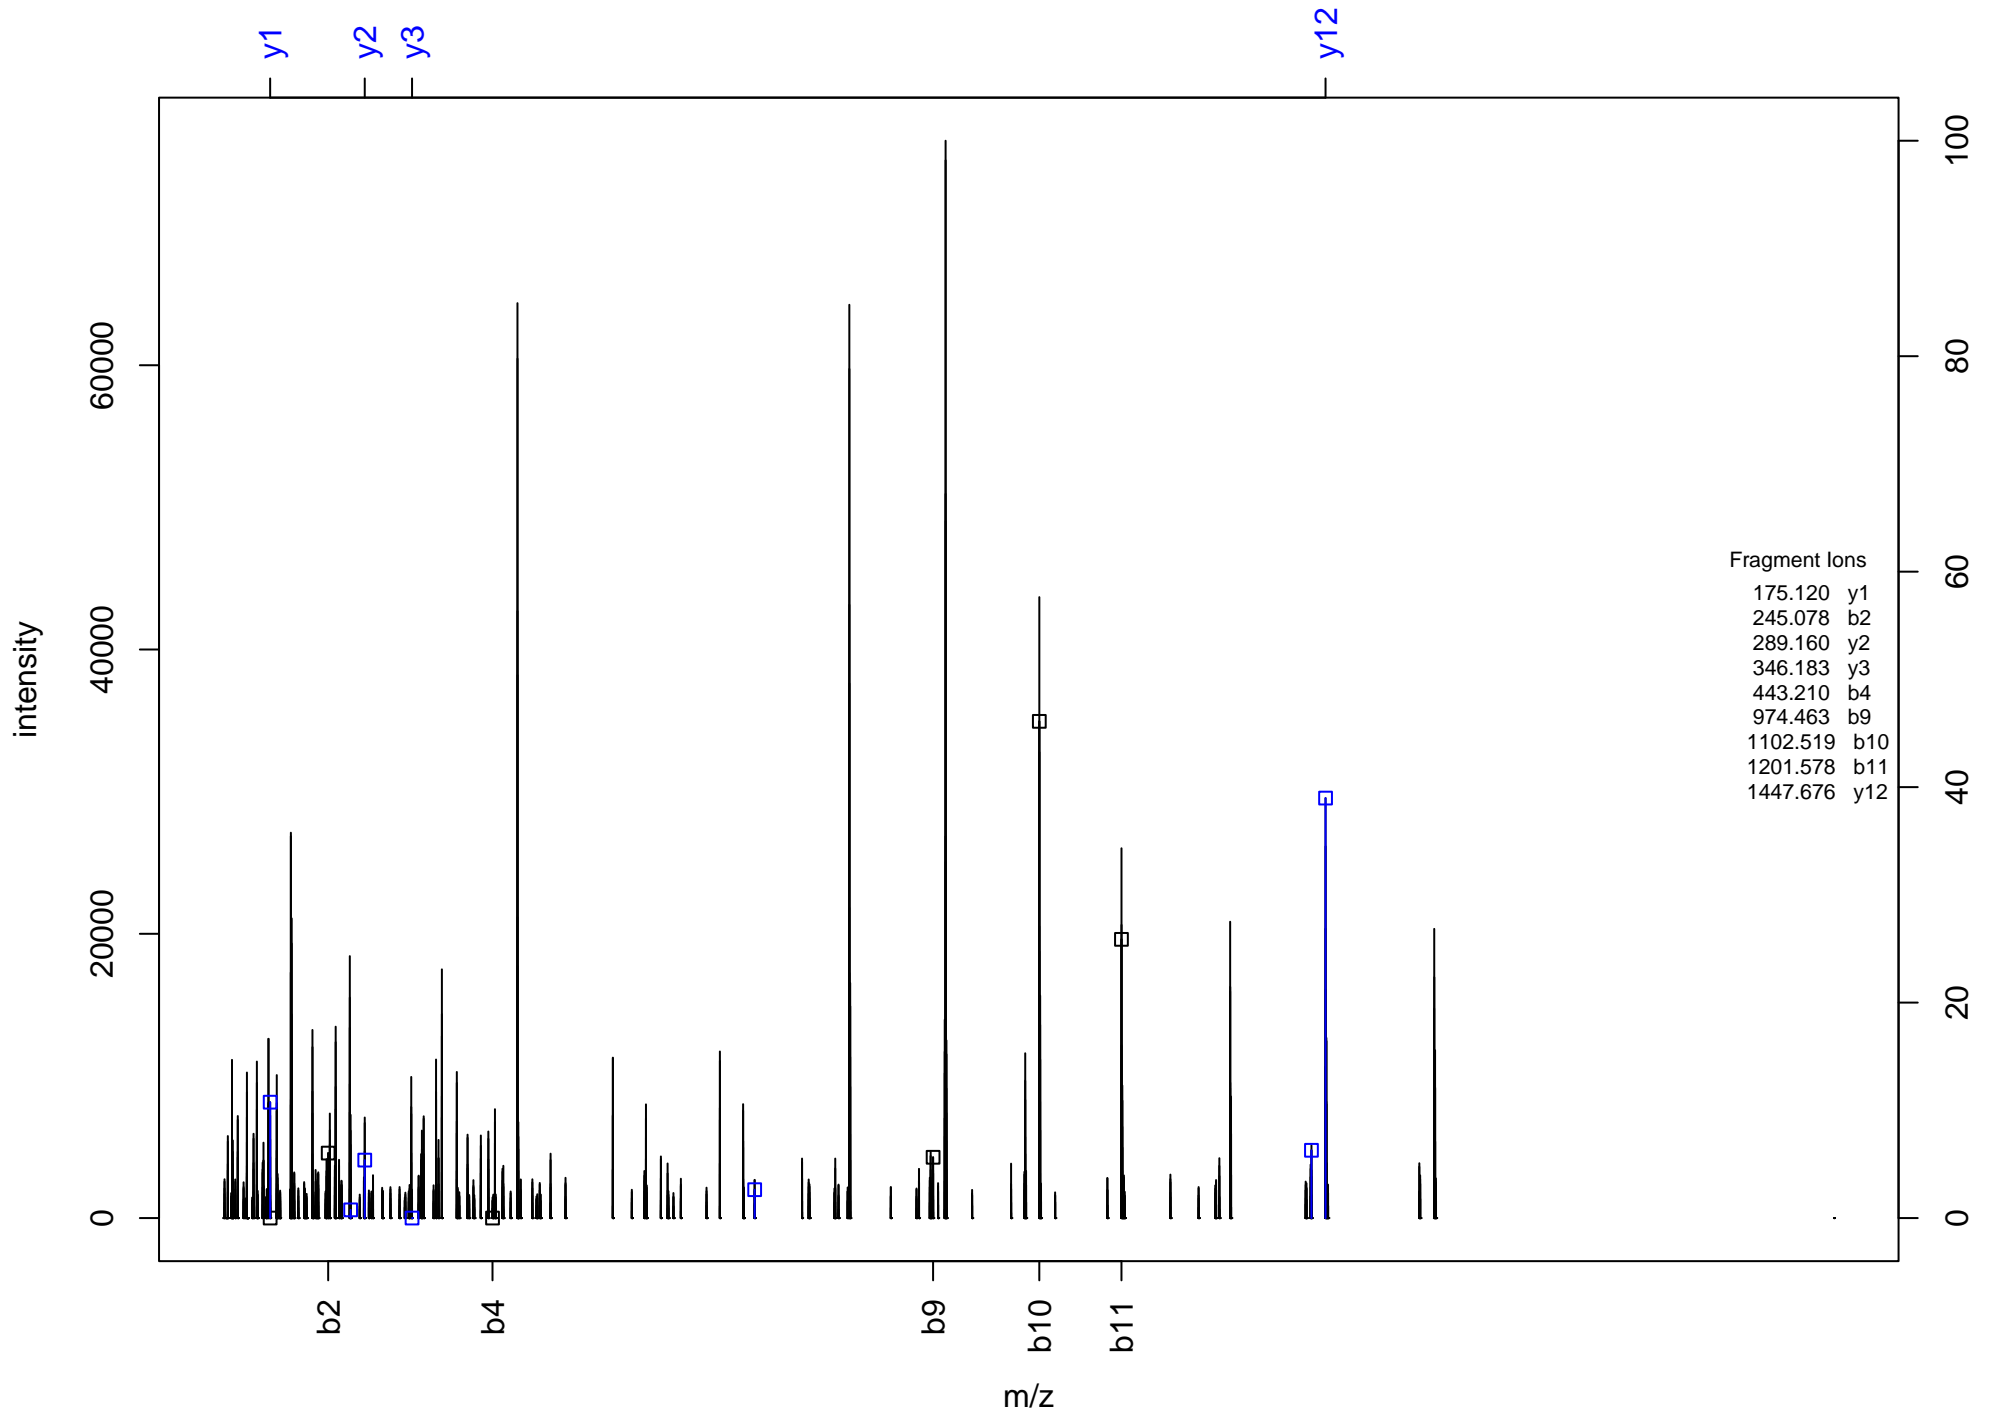

# TPITQGTGVNFPIGEIPSQPYYHDMNSGVNLQR

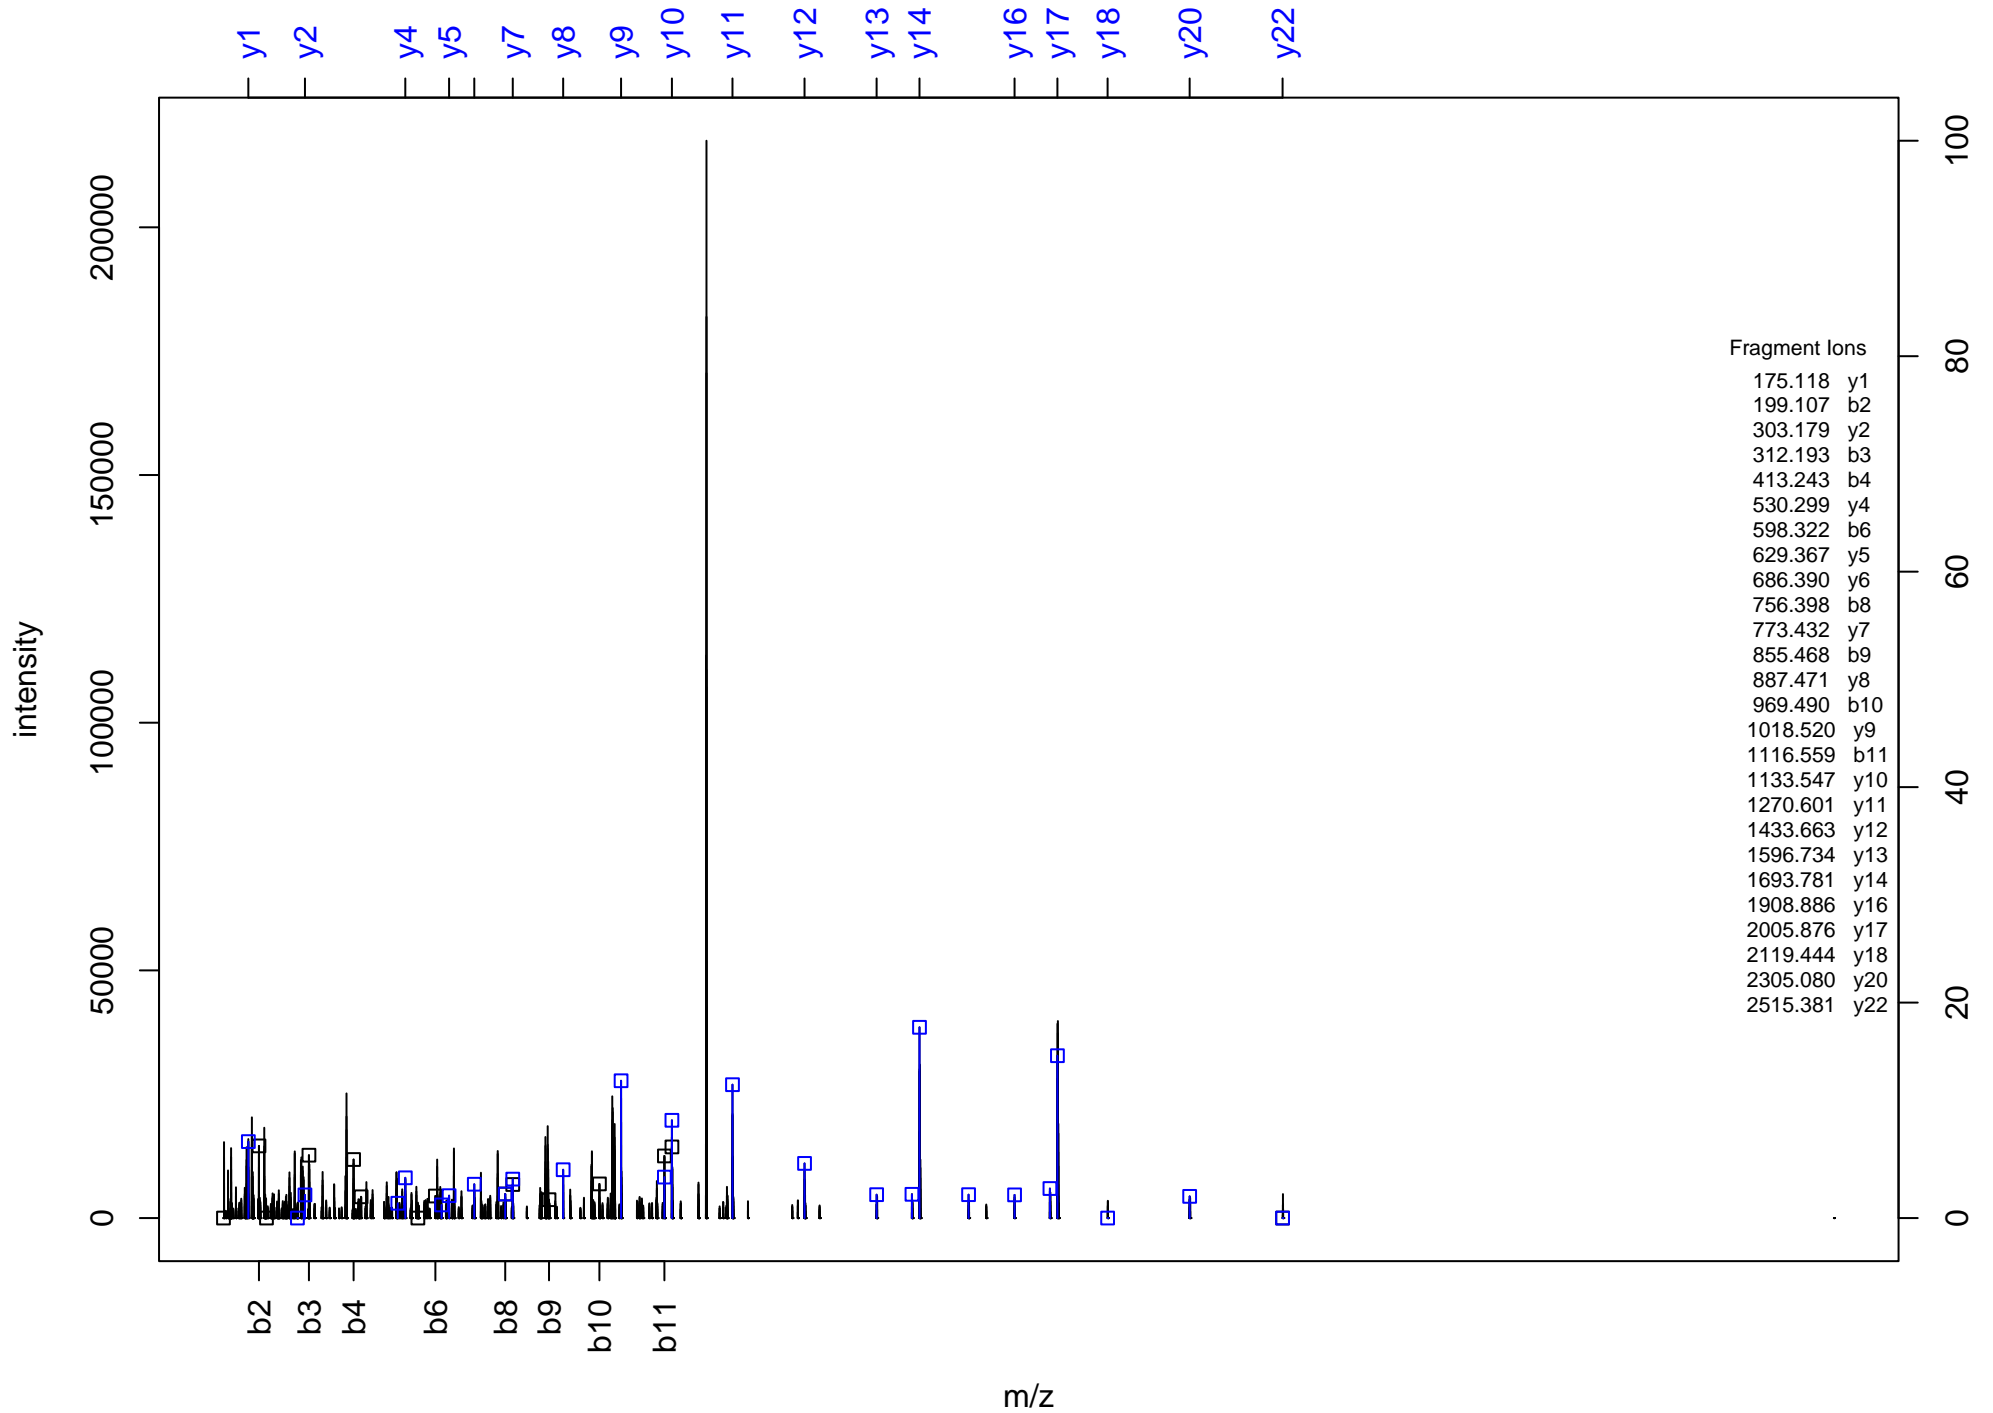

# LSQDIN^KNEER

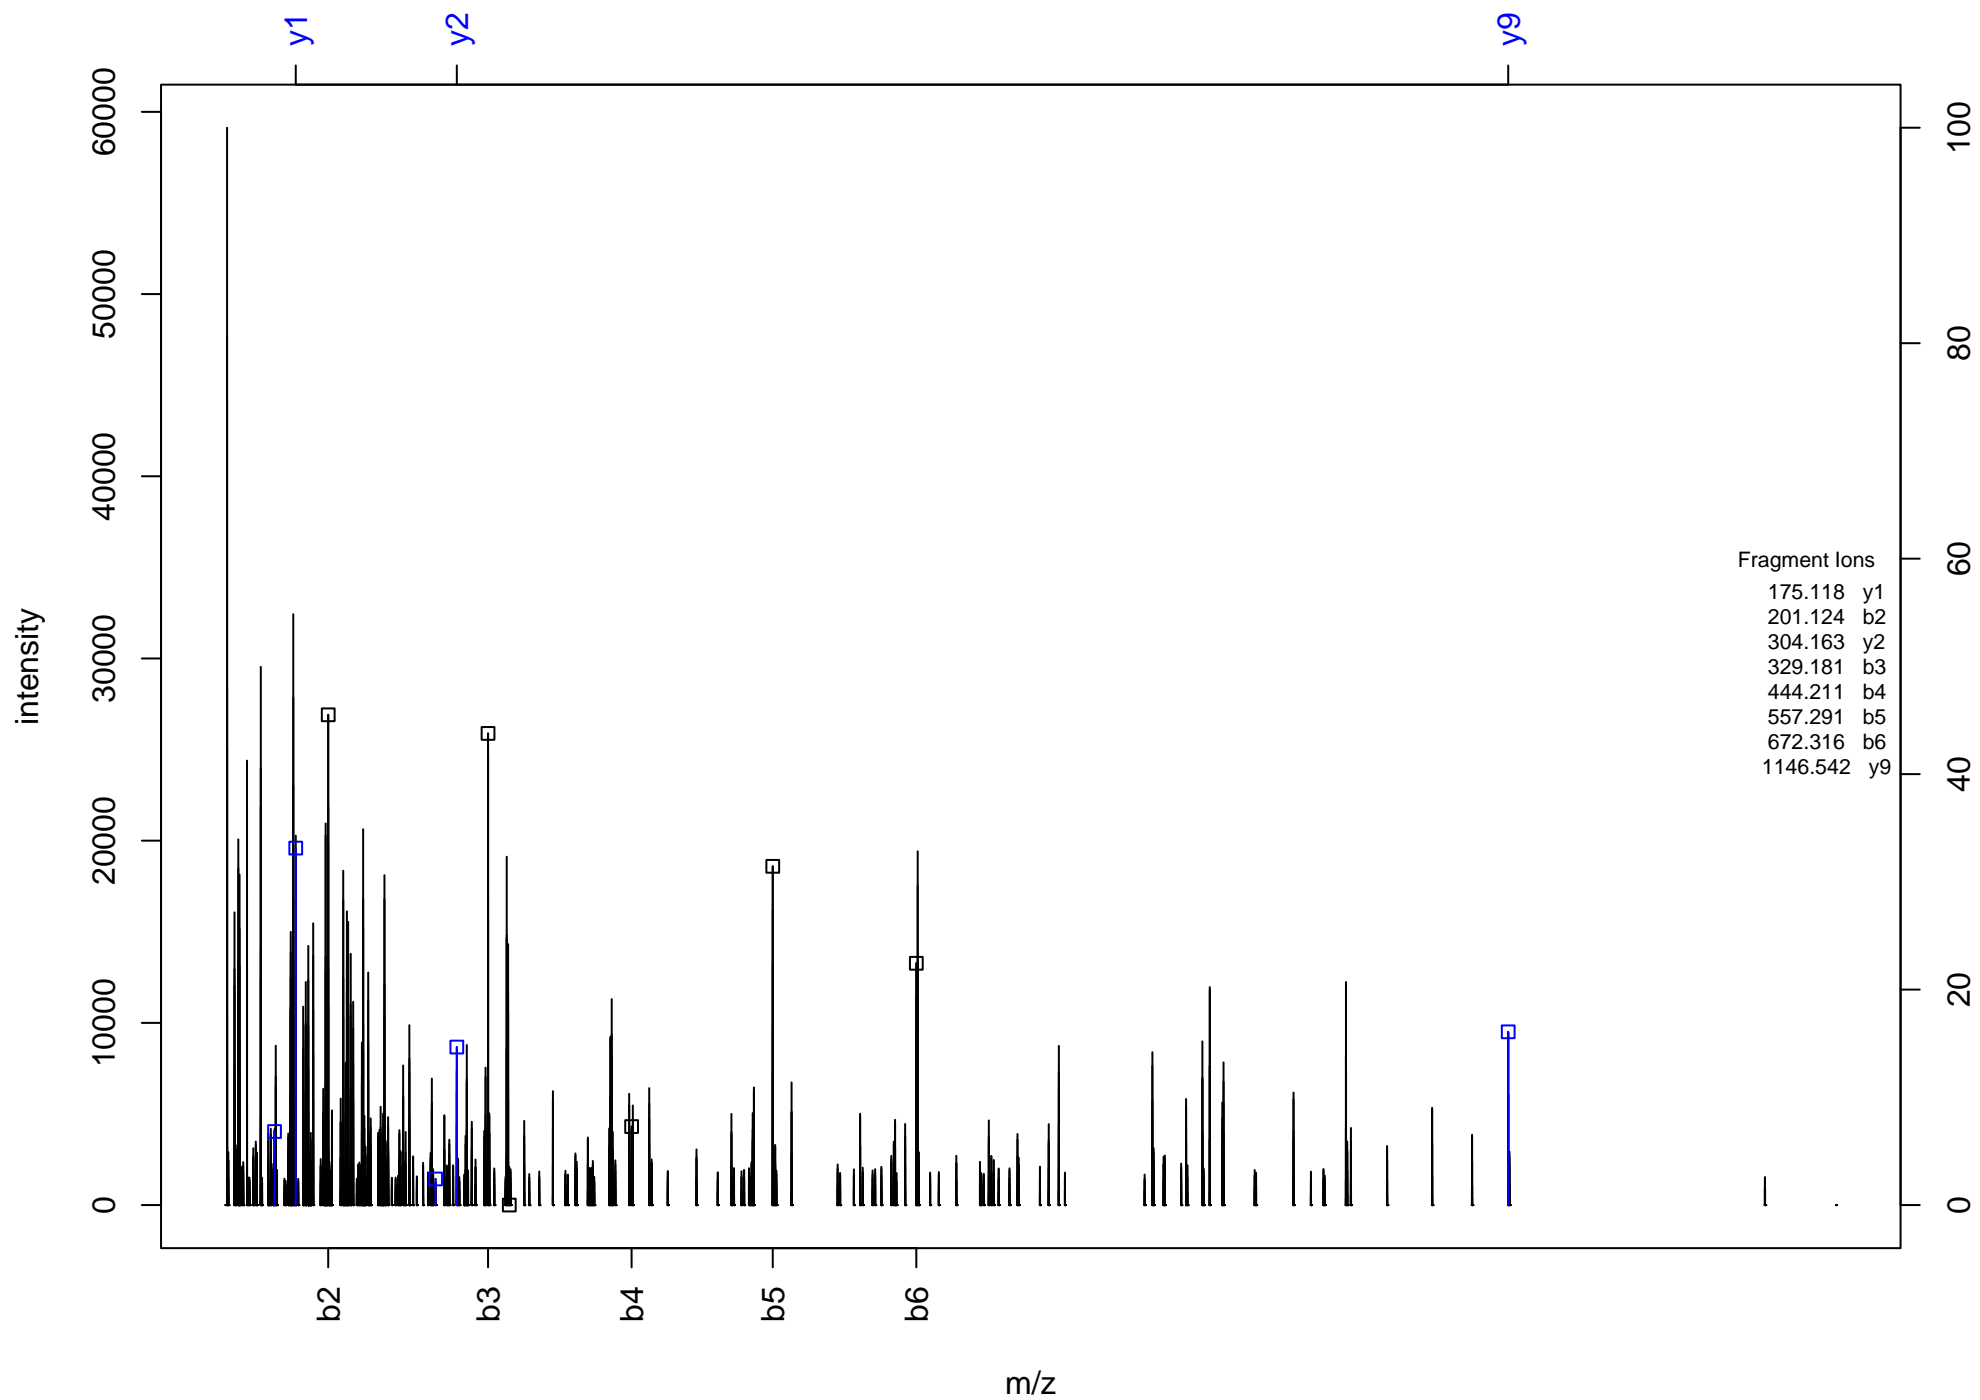

# SNAVNQVVLWDK

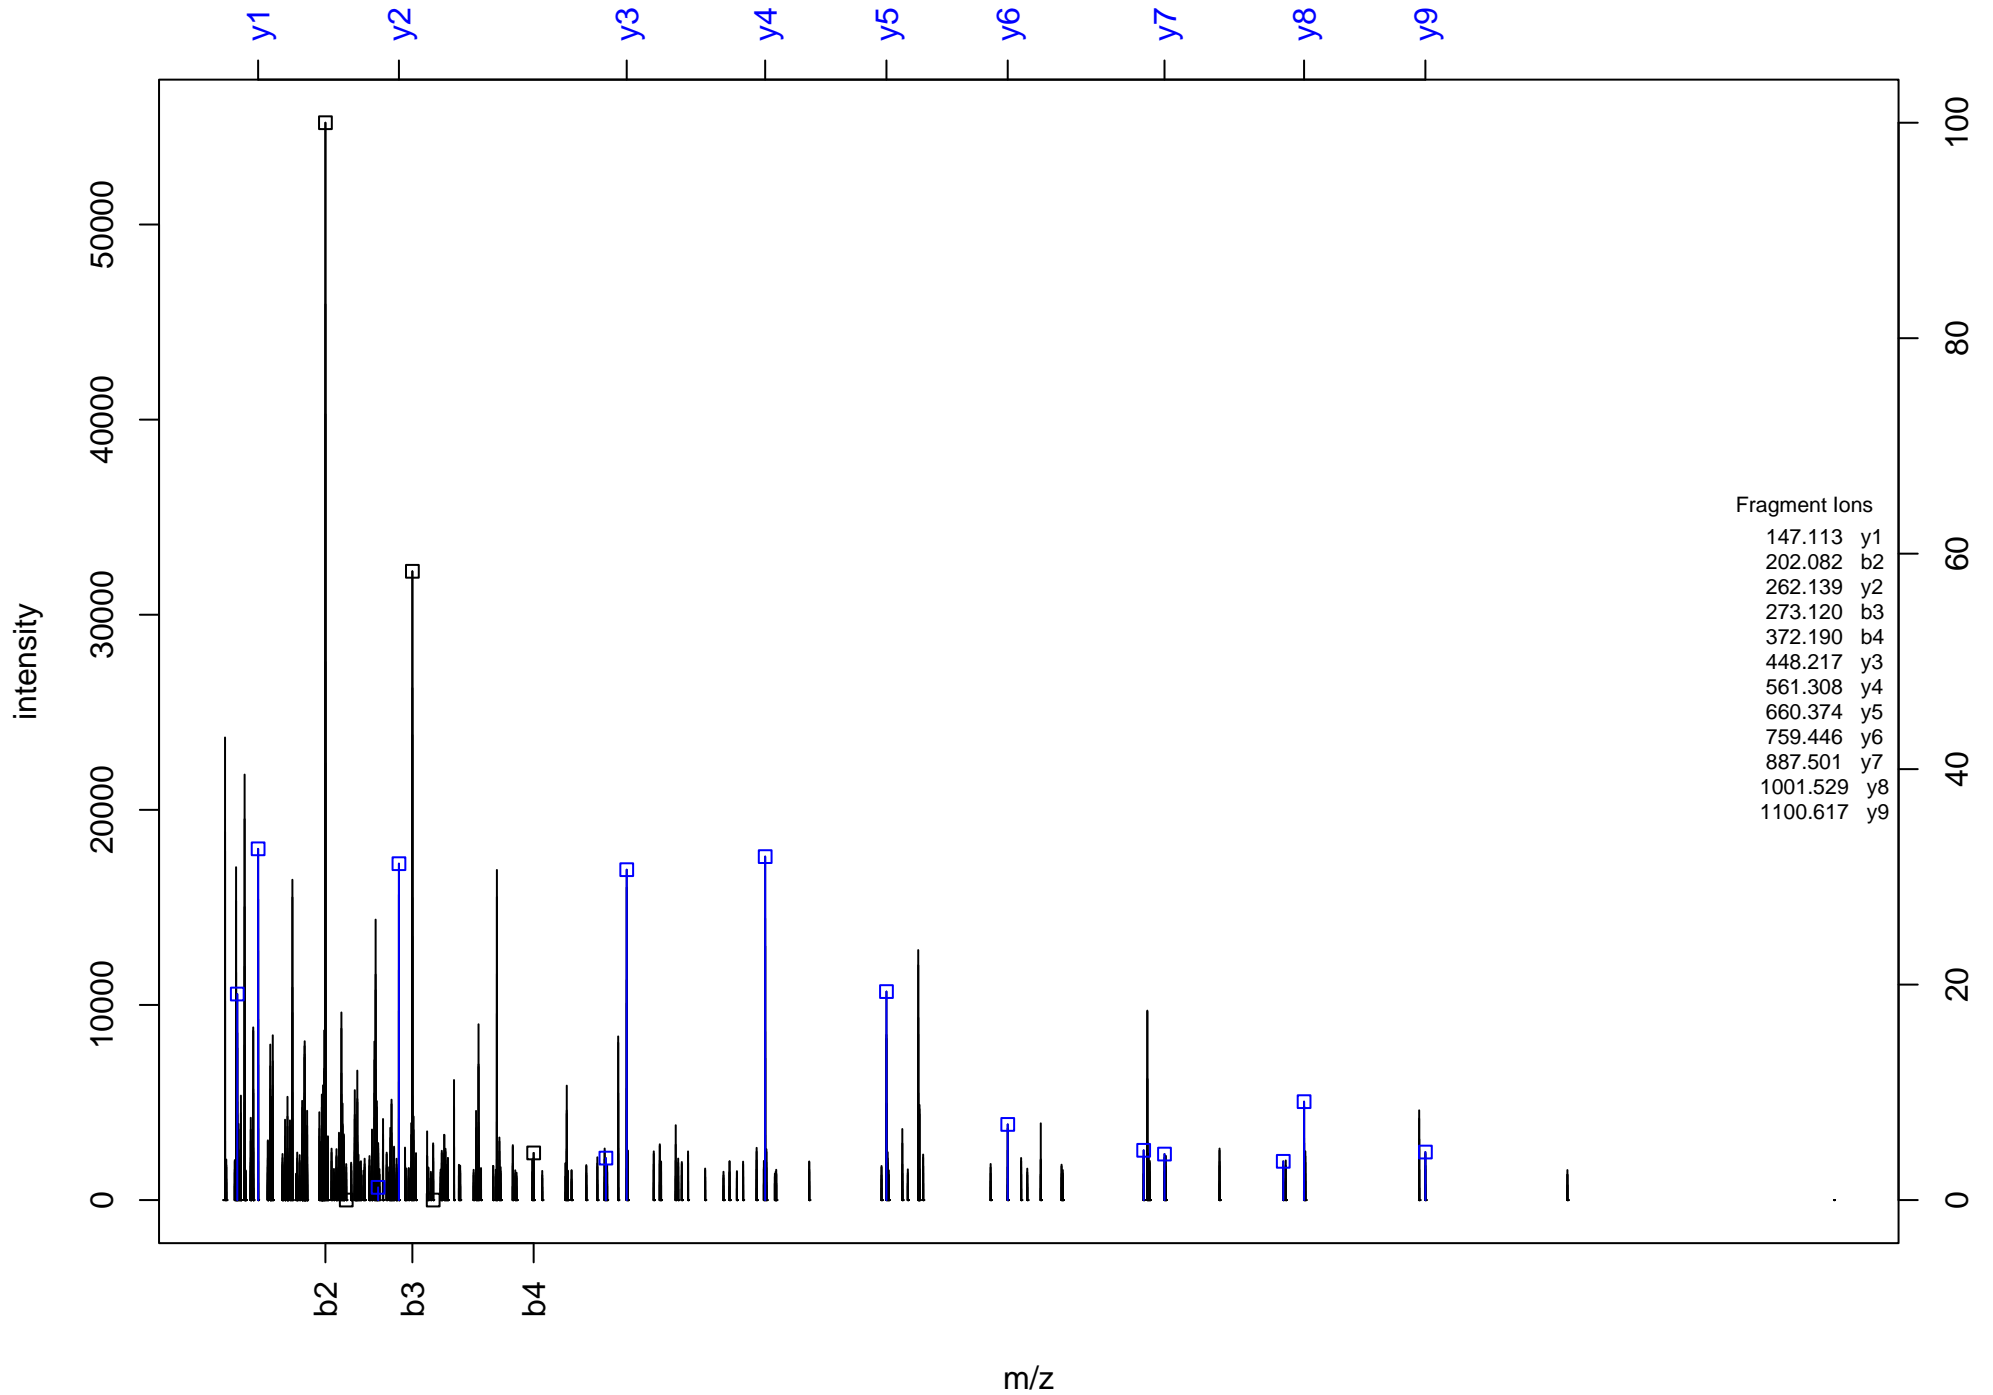

# FGFAIGSQSTAR

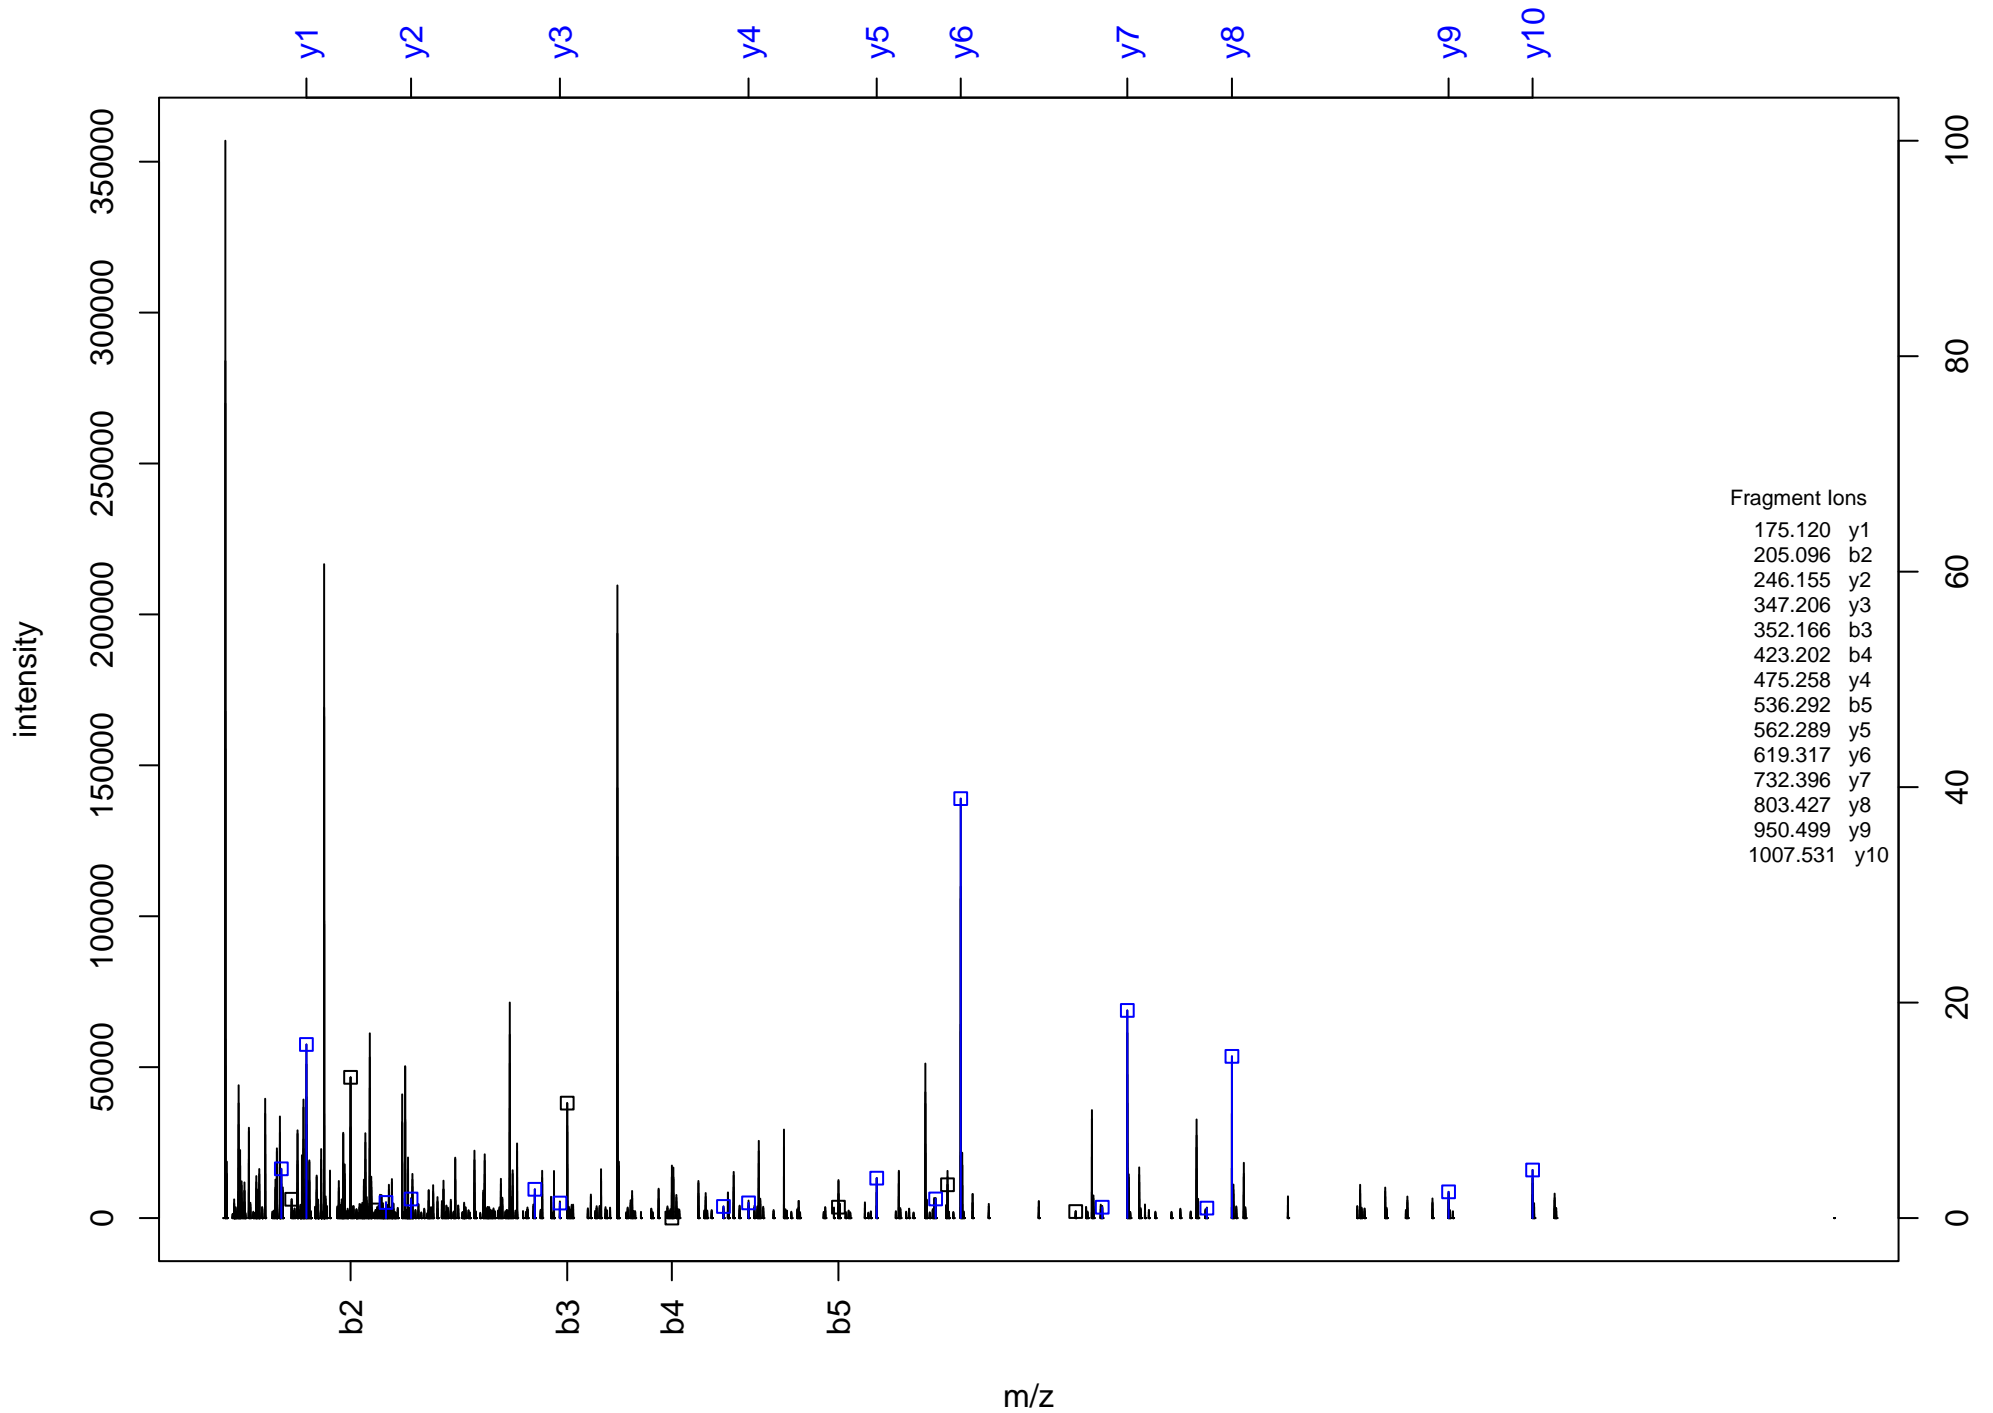

# (Ac)AGYEYVSPEQLSGFDK

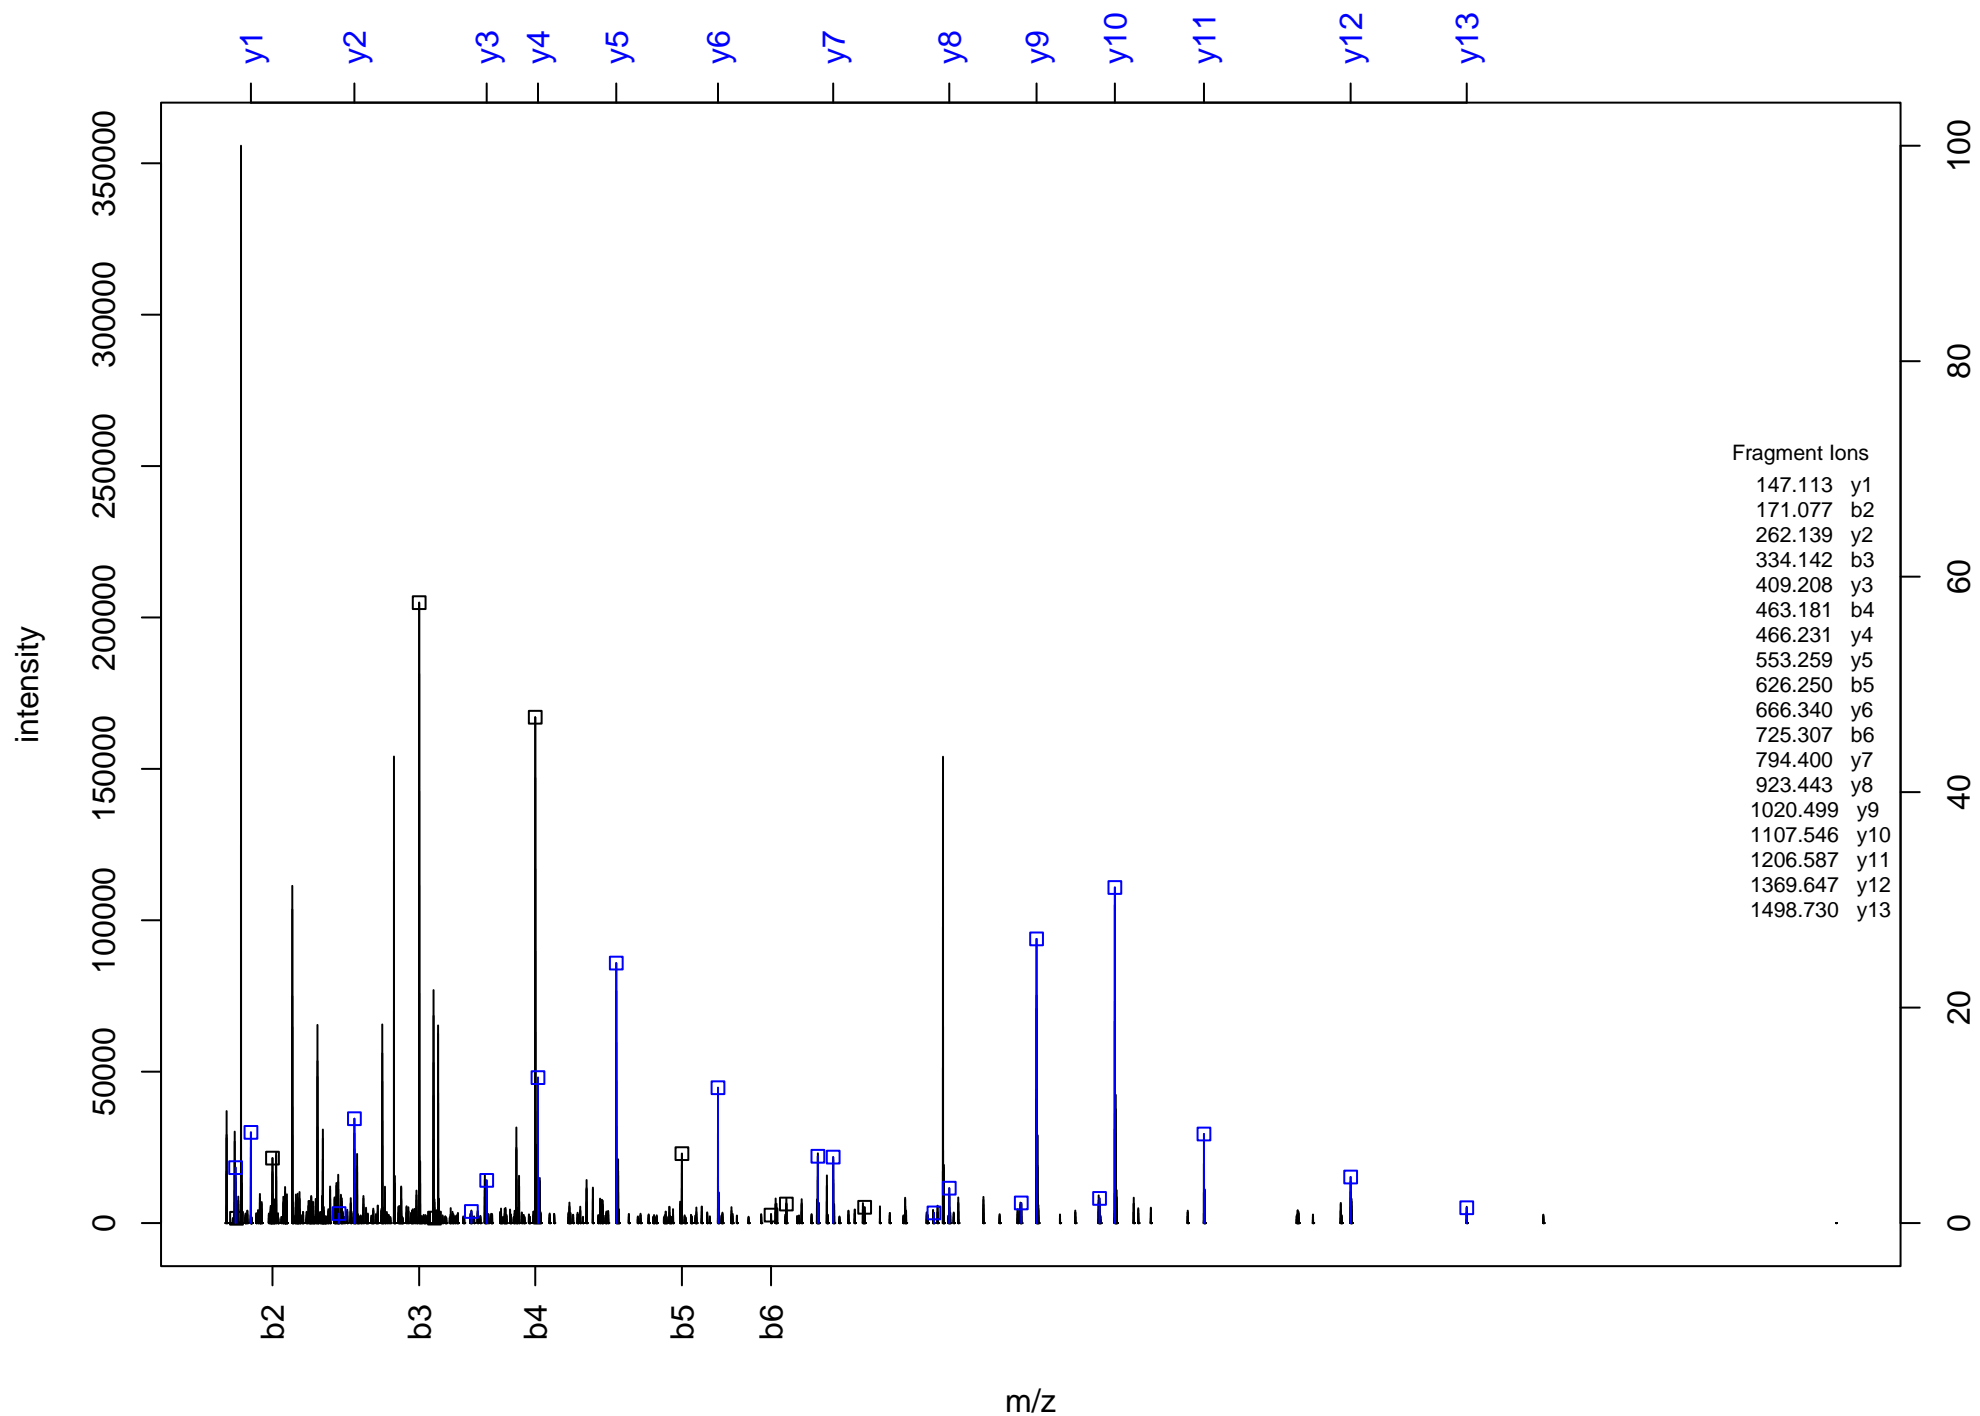

# LFLIDFGLAK

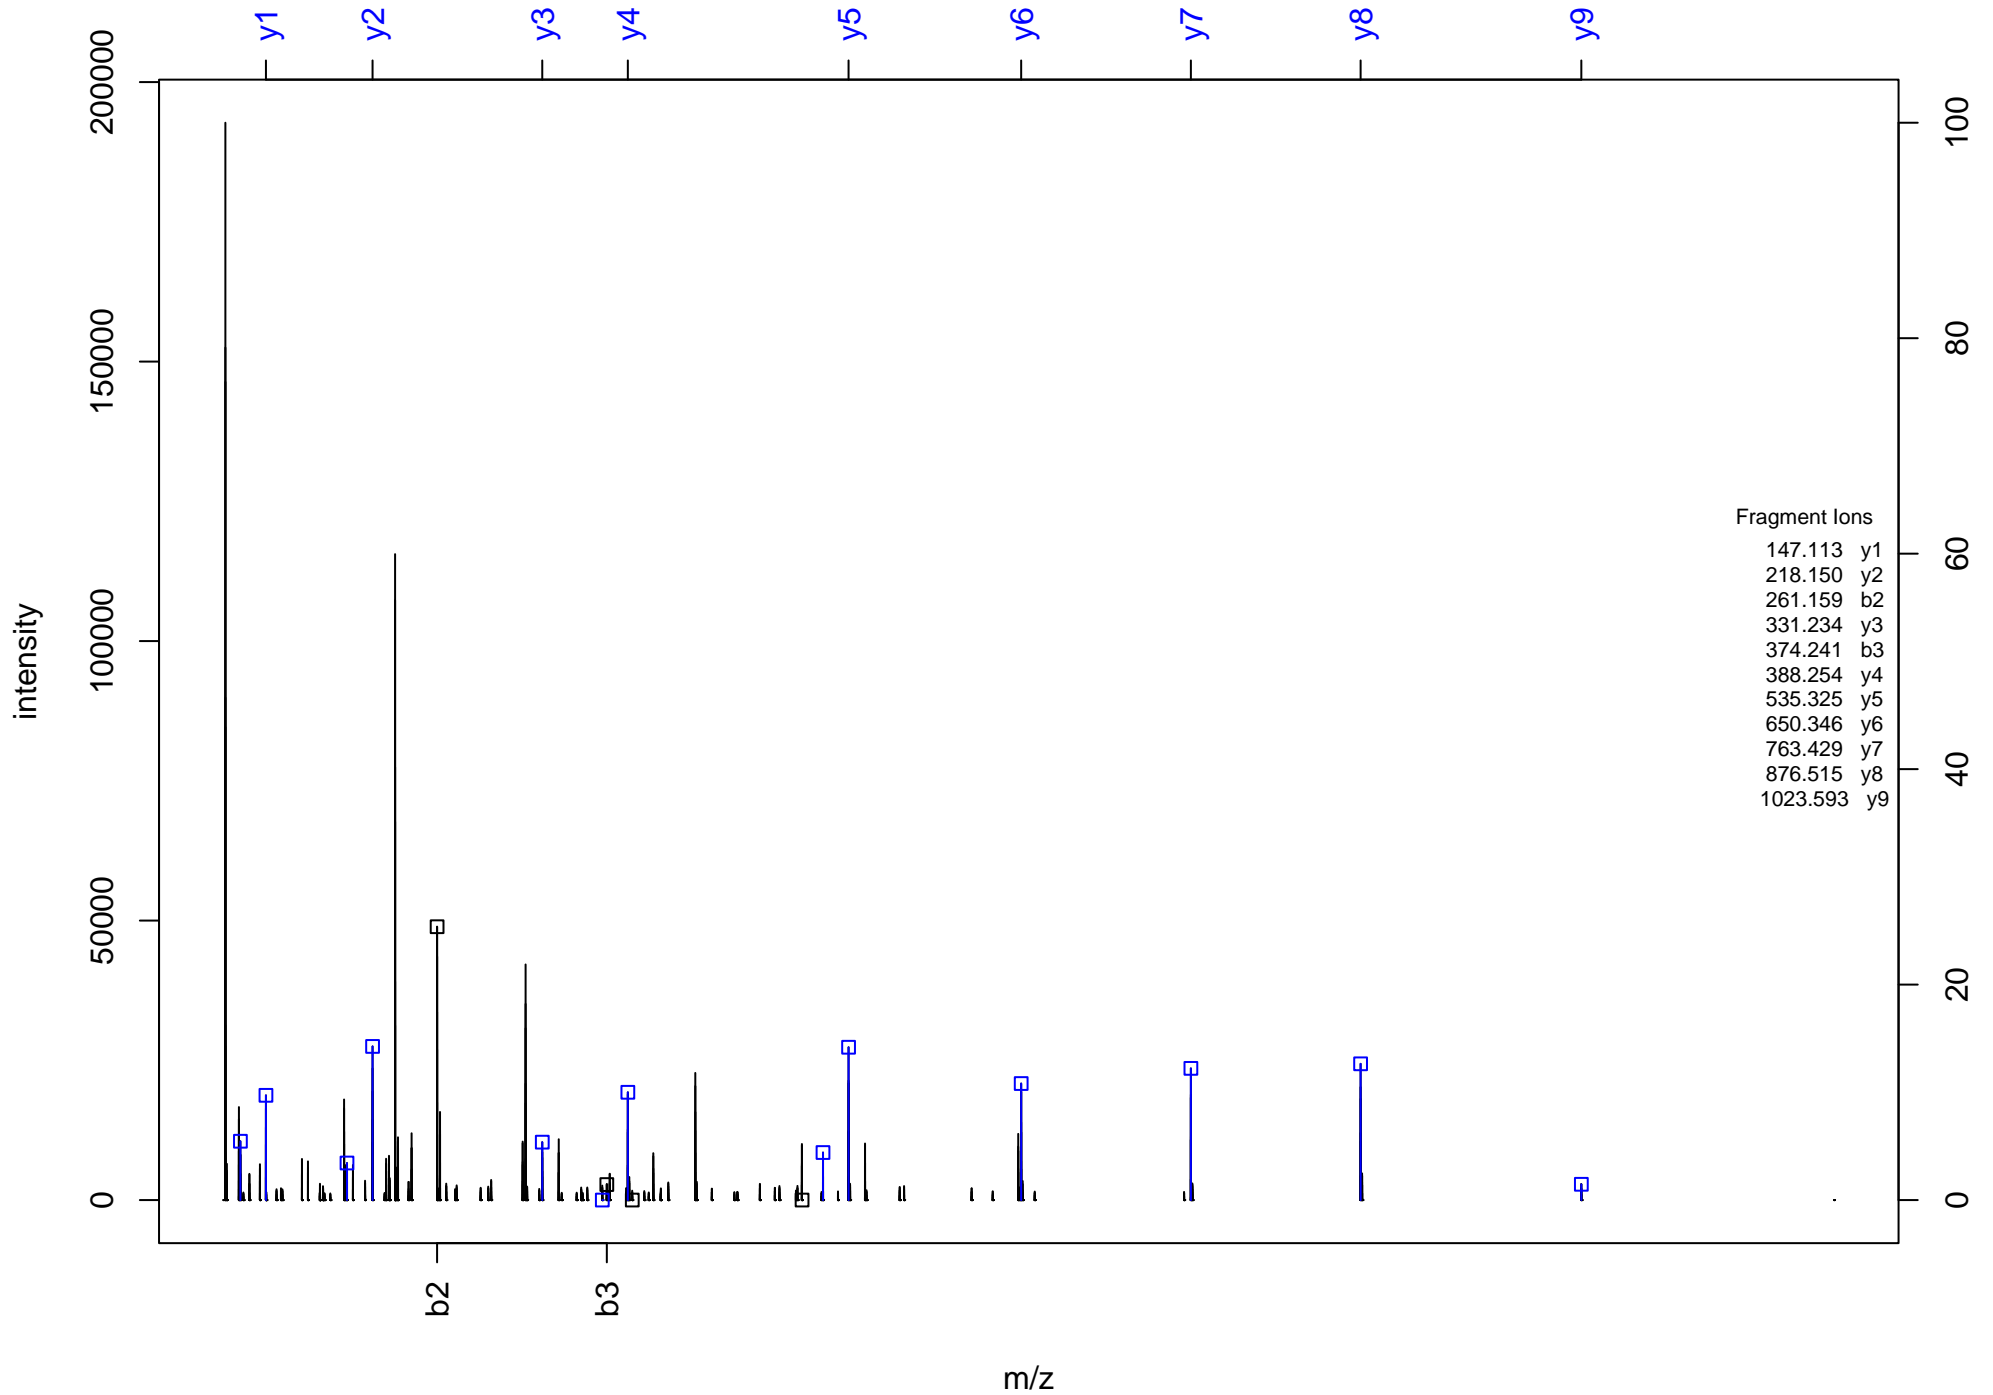



# WWWVWN^EVLKDIQ^QM\*N^K

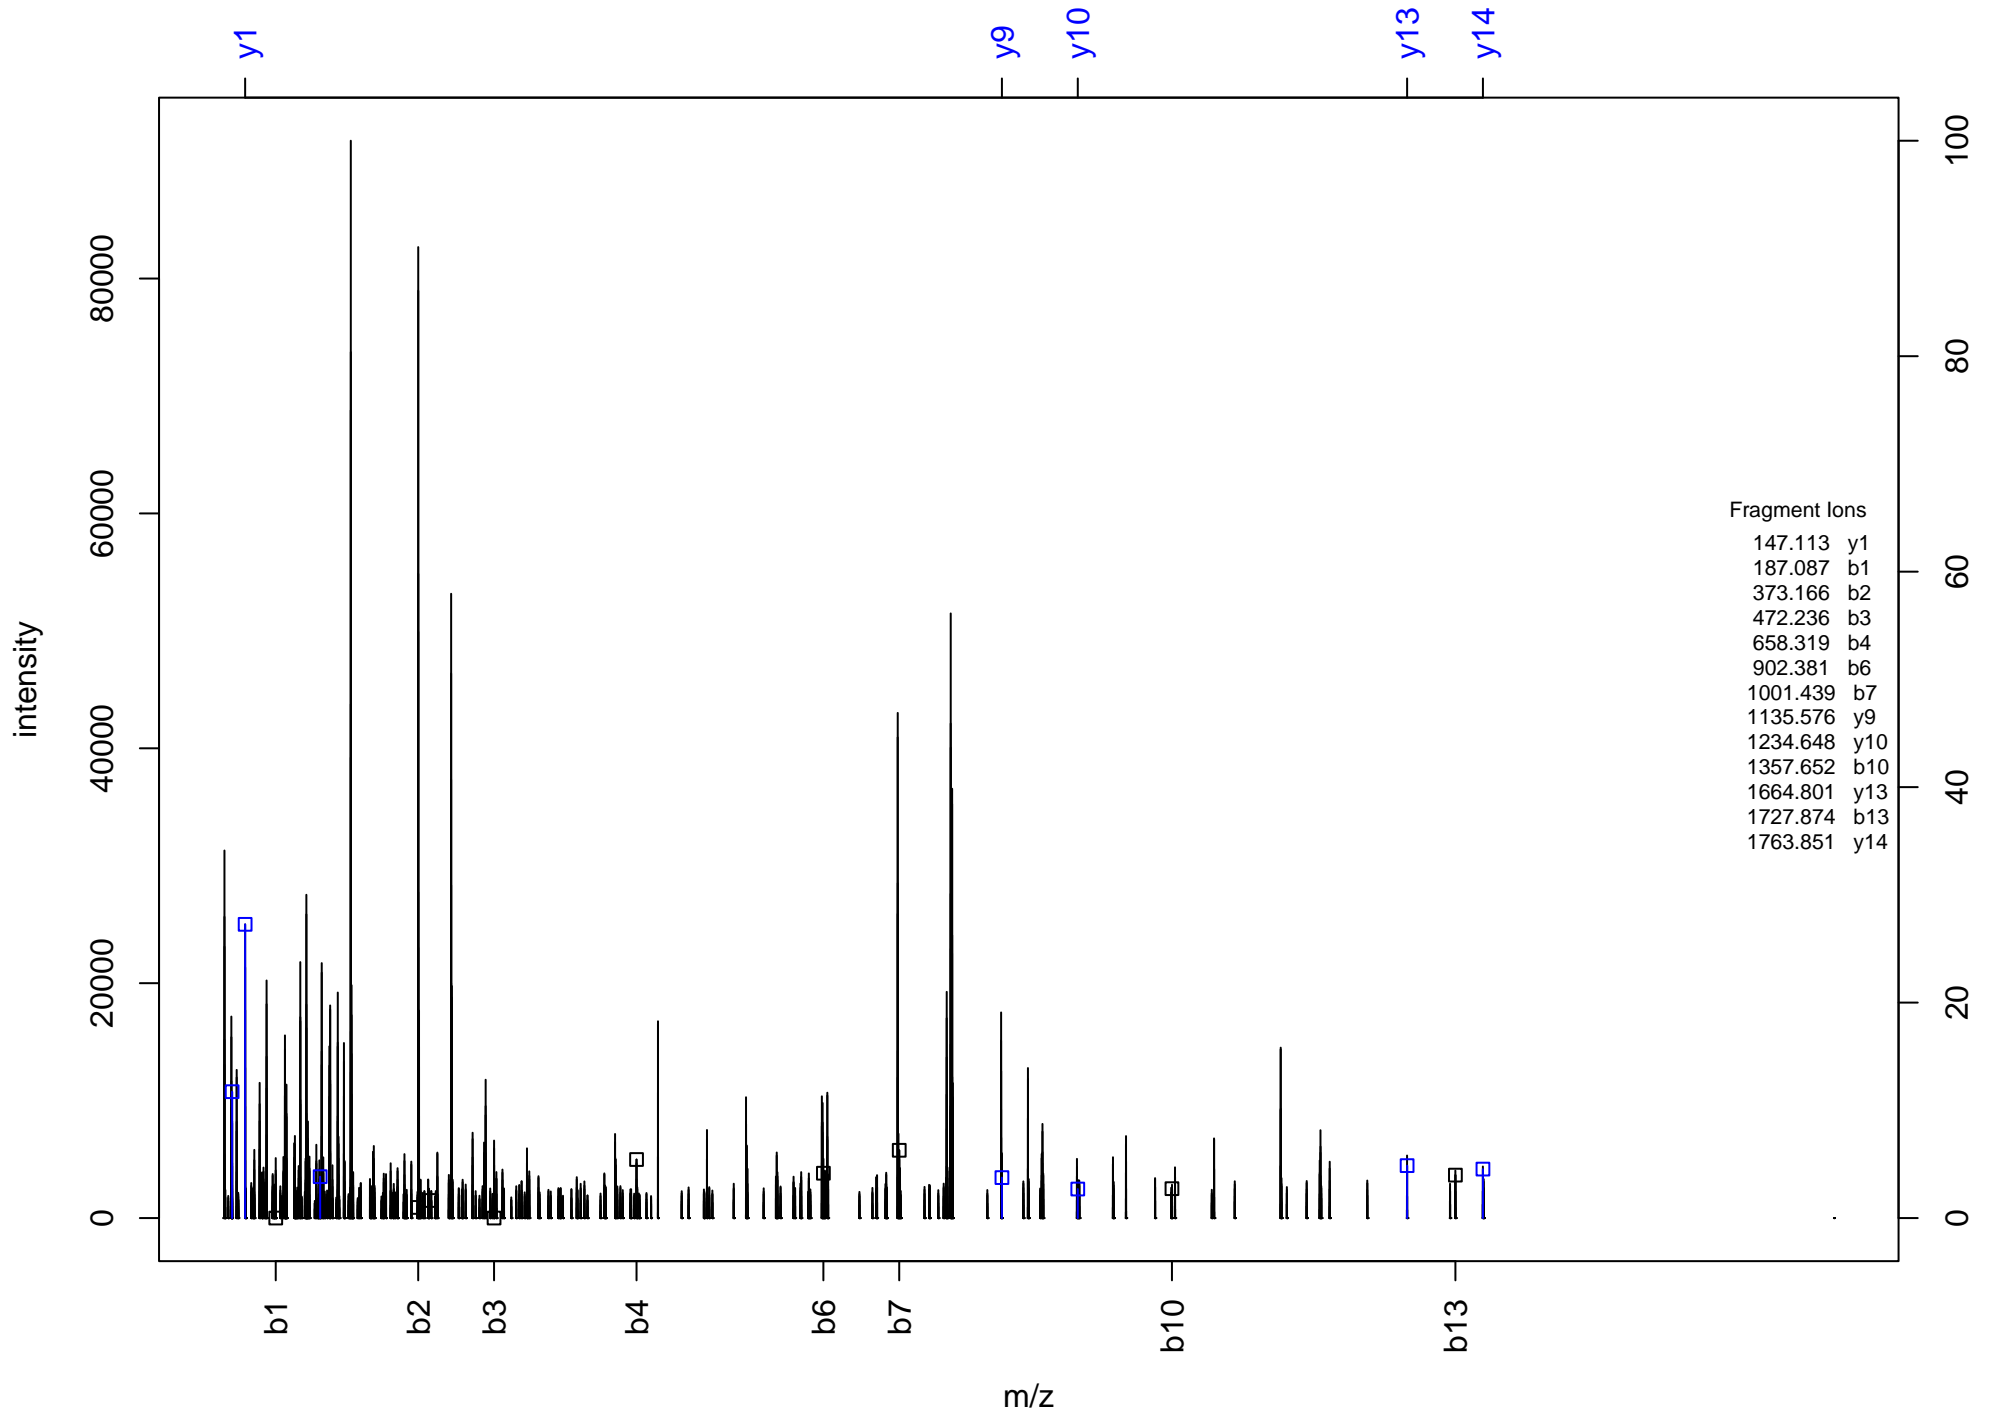

# DIPDLYDDAAIFQAK

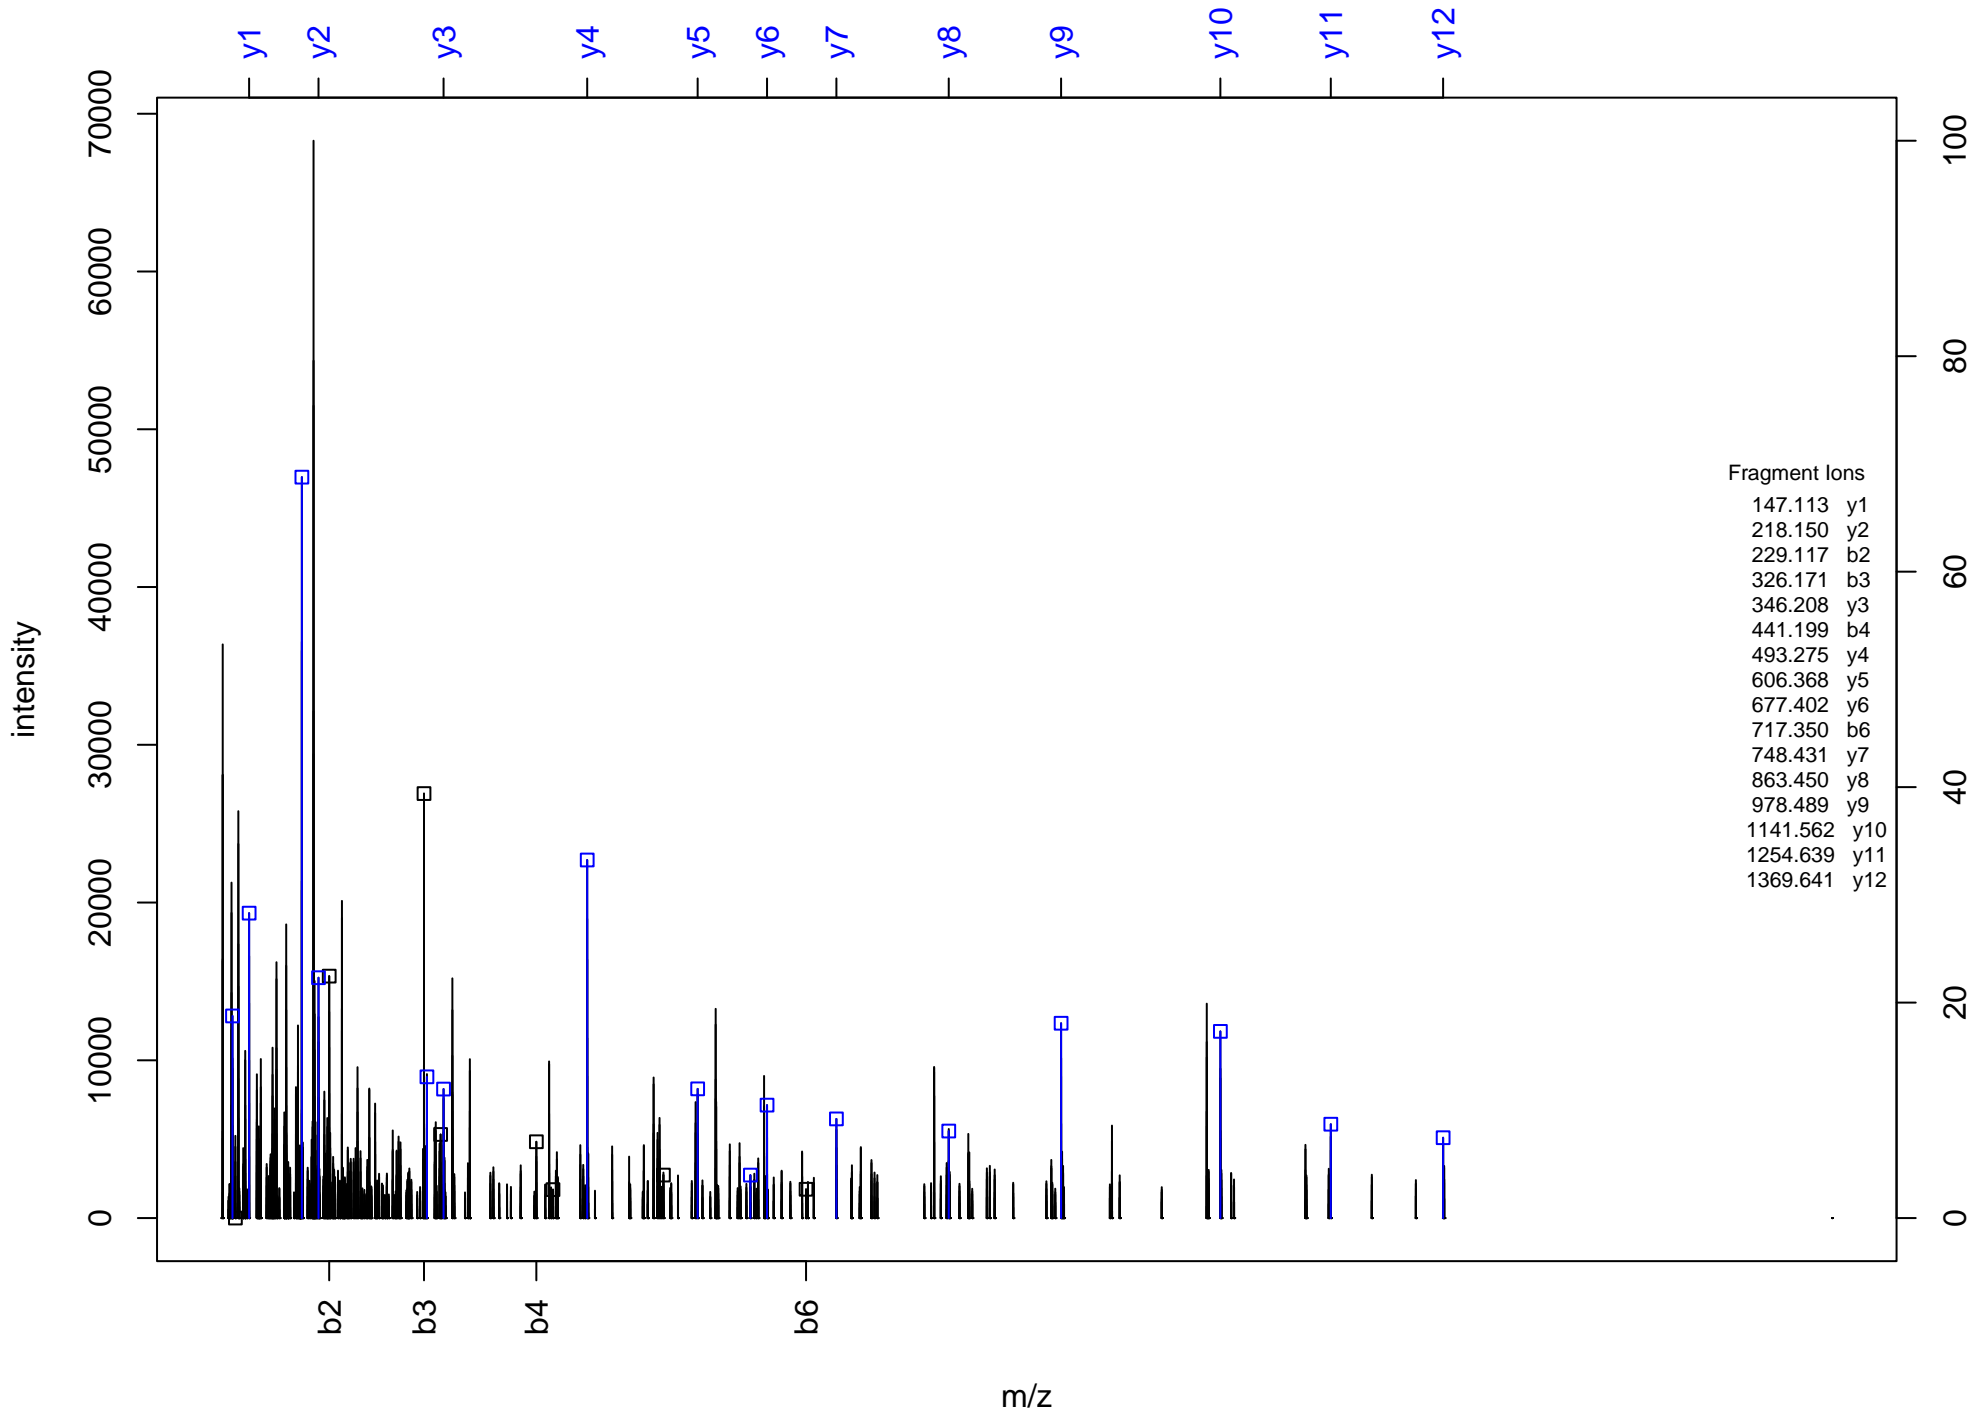

# VENEGGTIPVESSDIVPTWDGIR

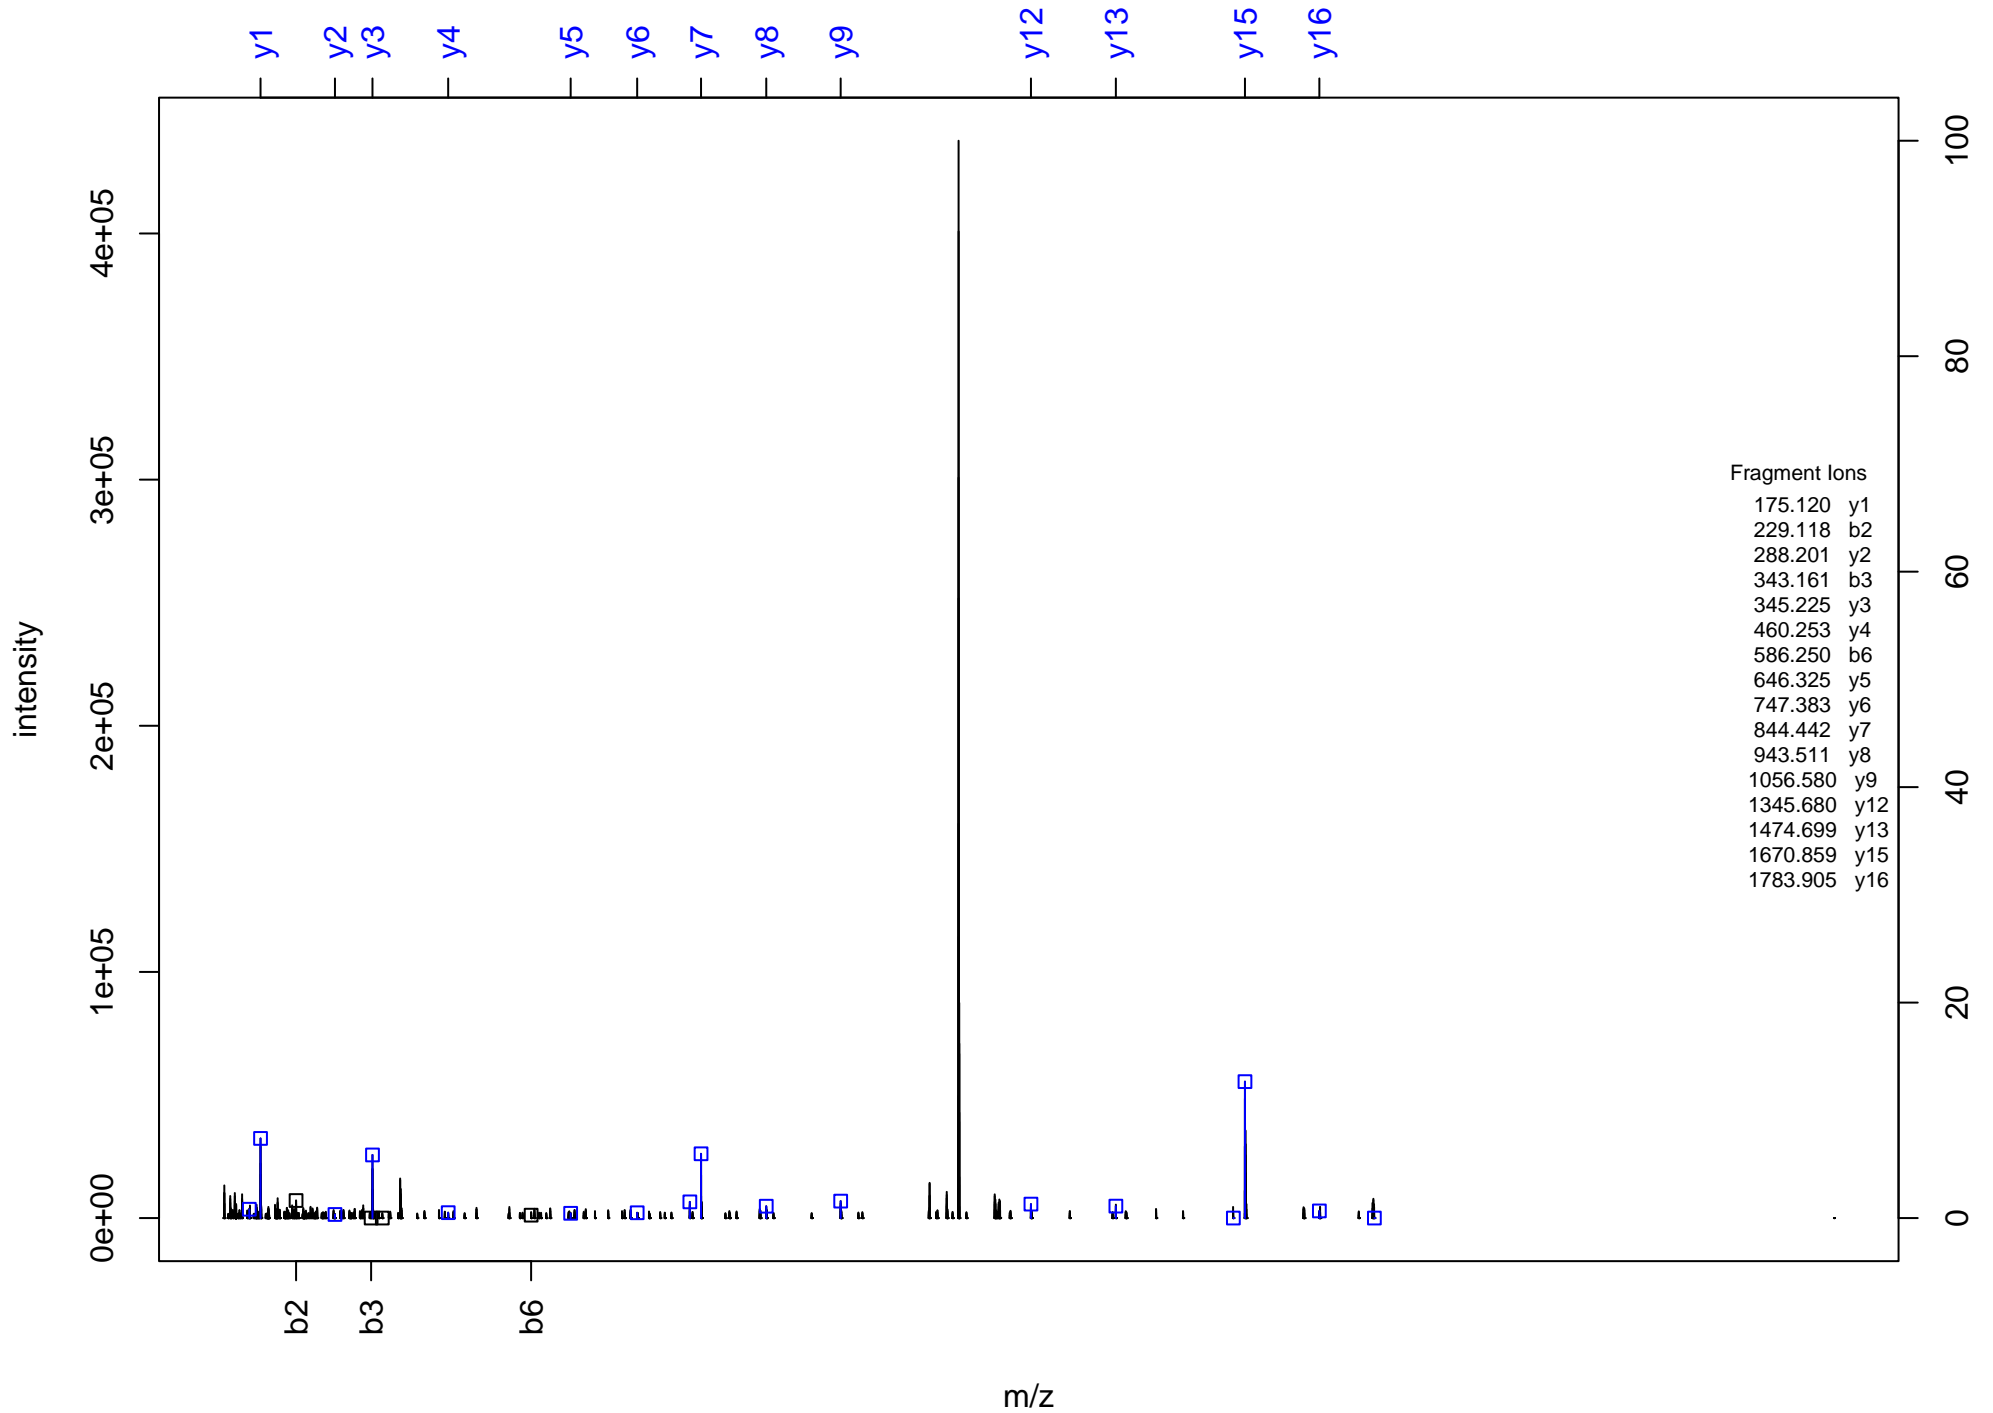

# SLLSQ^KEN^IN^VLDQ^ERR

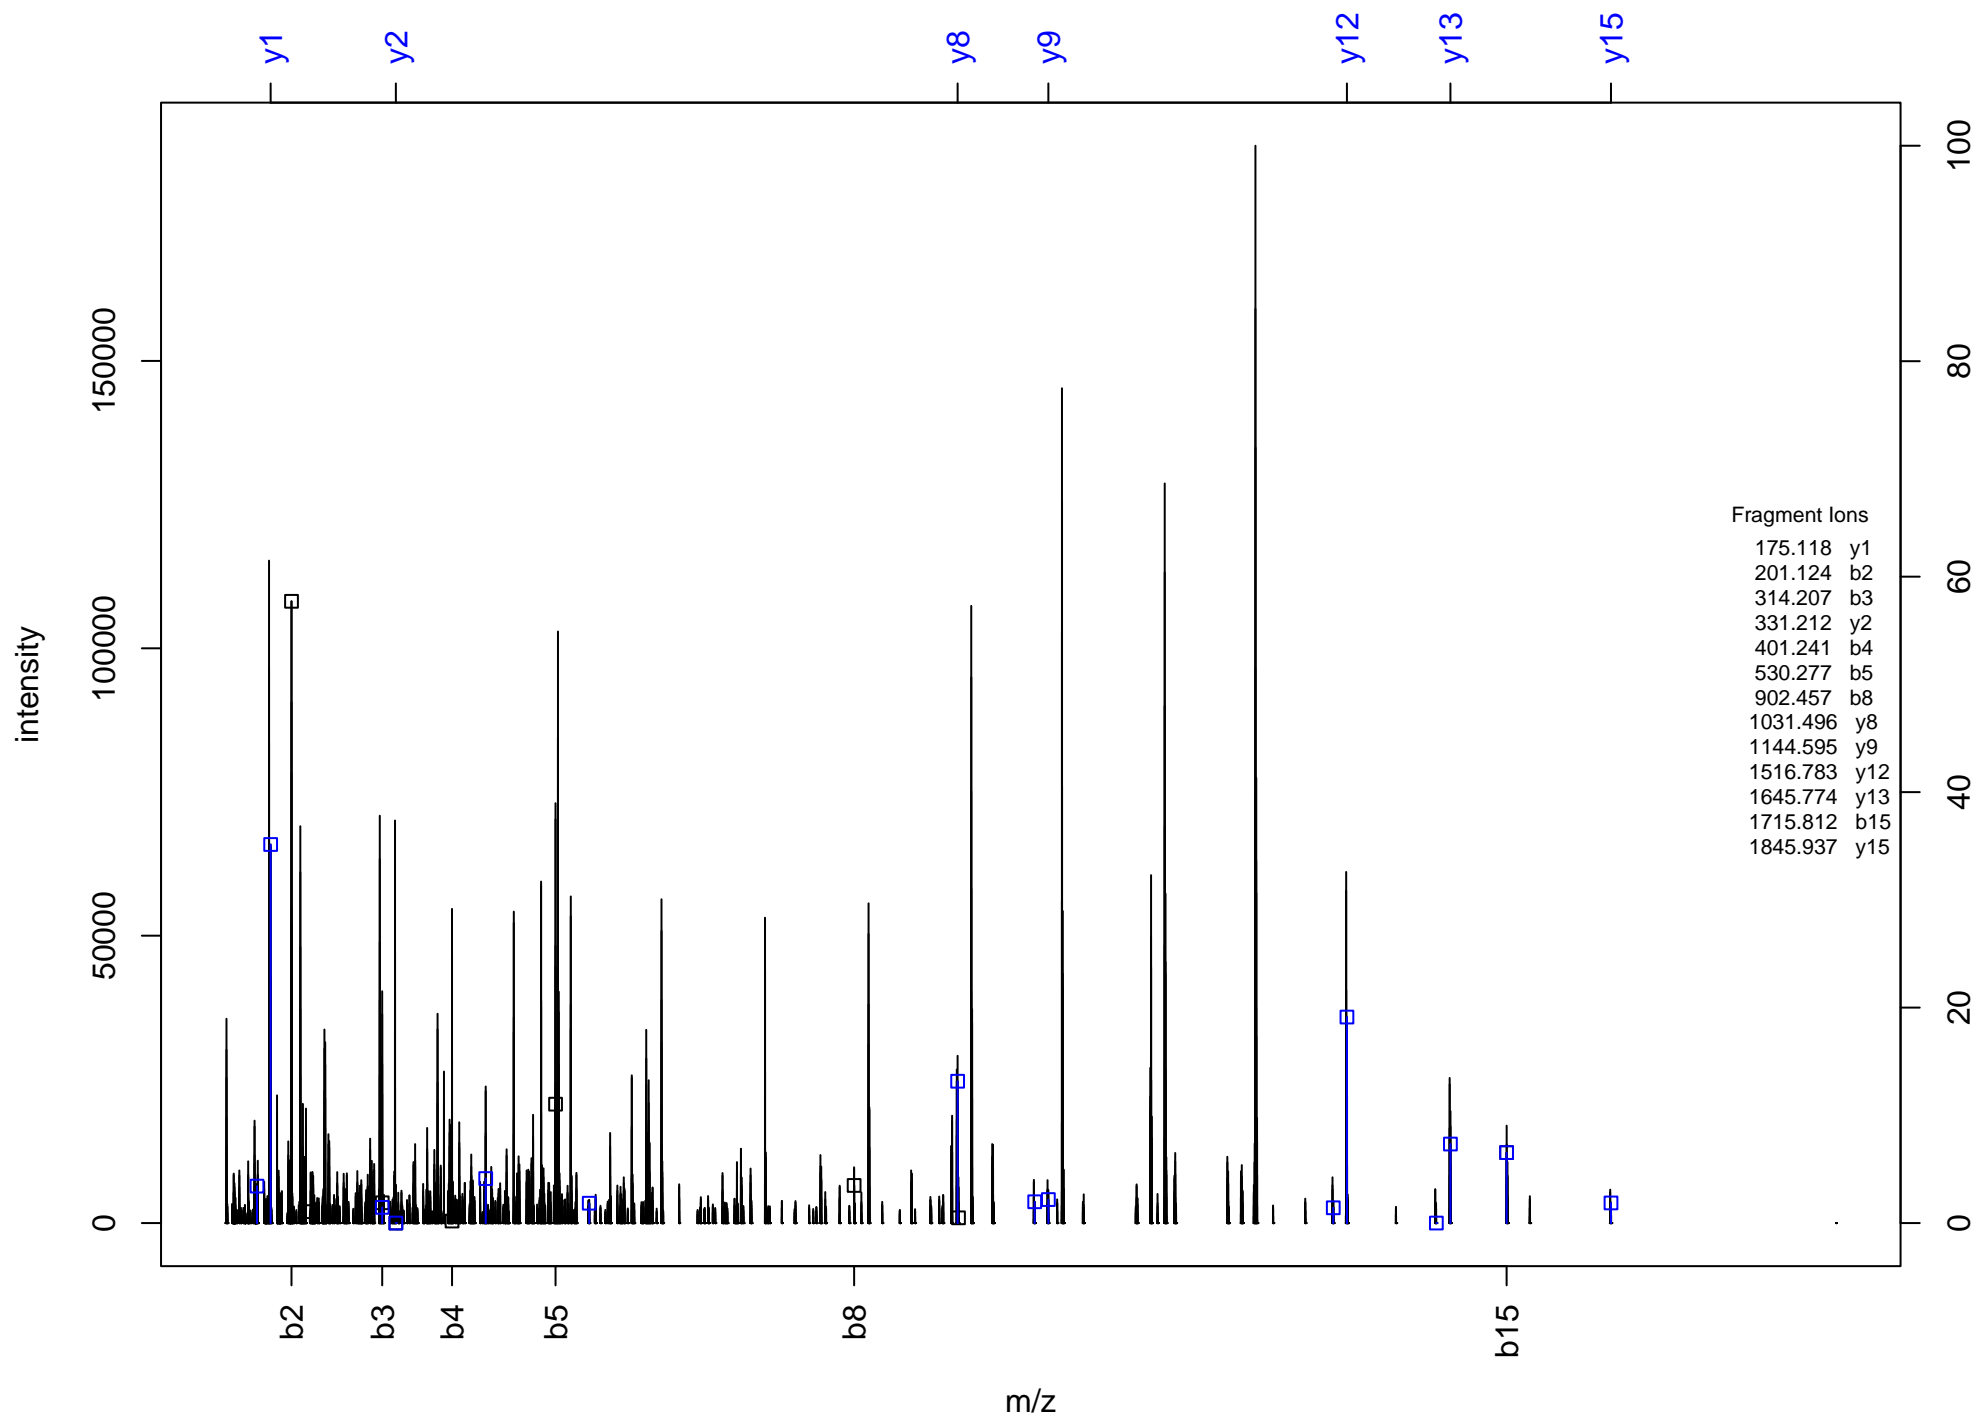

# LFGTSPAAEVTPSPPEPAPALEAPAR

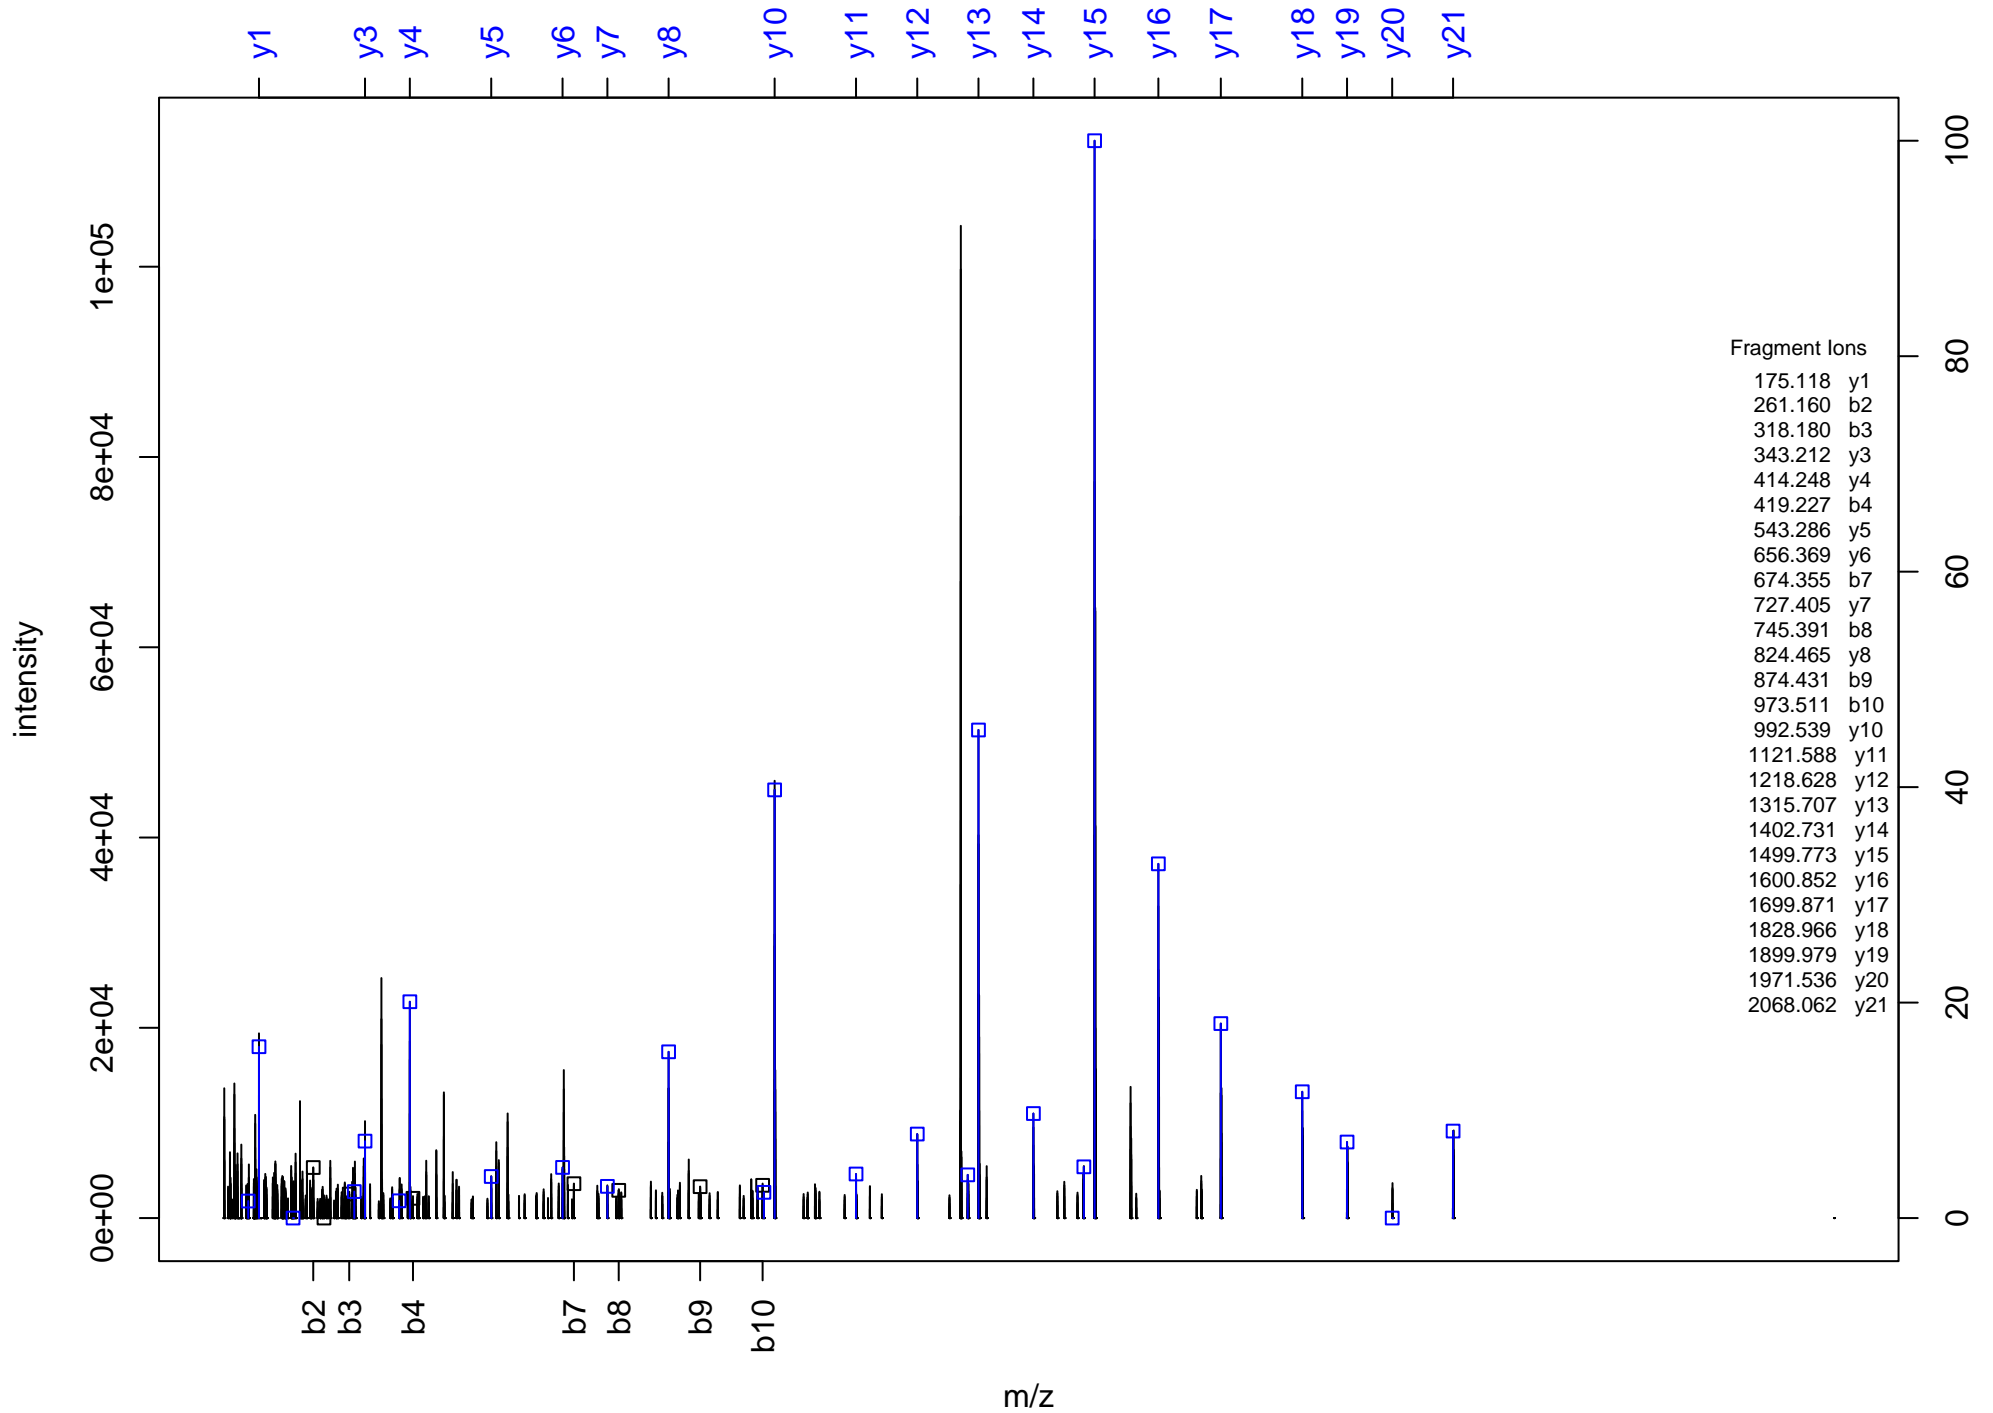

# GDVEEVQGPVGVGEFFPIISPGR

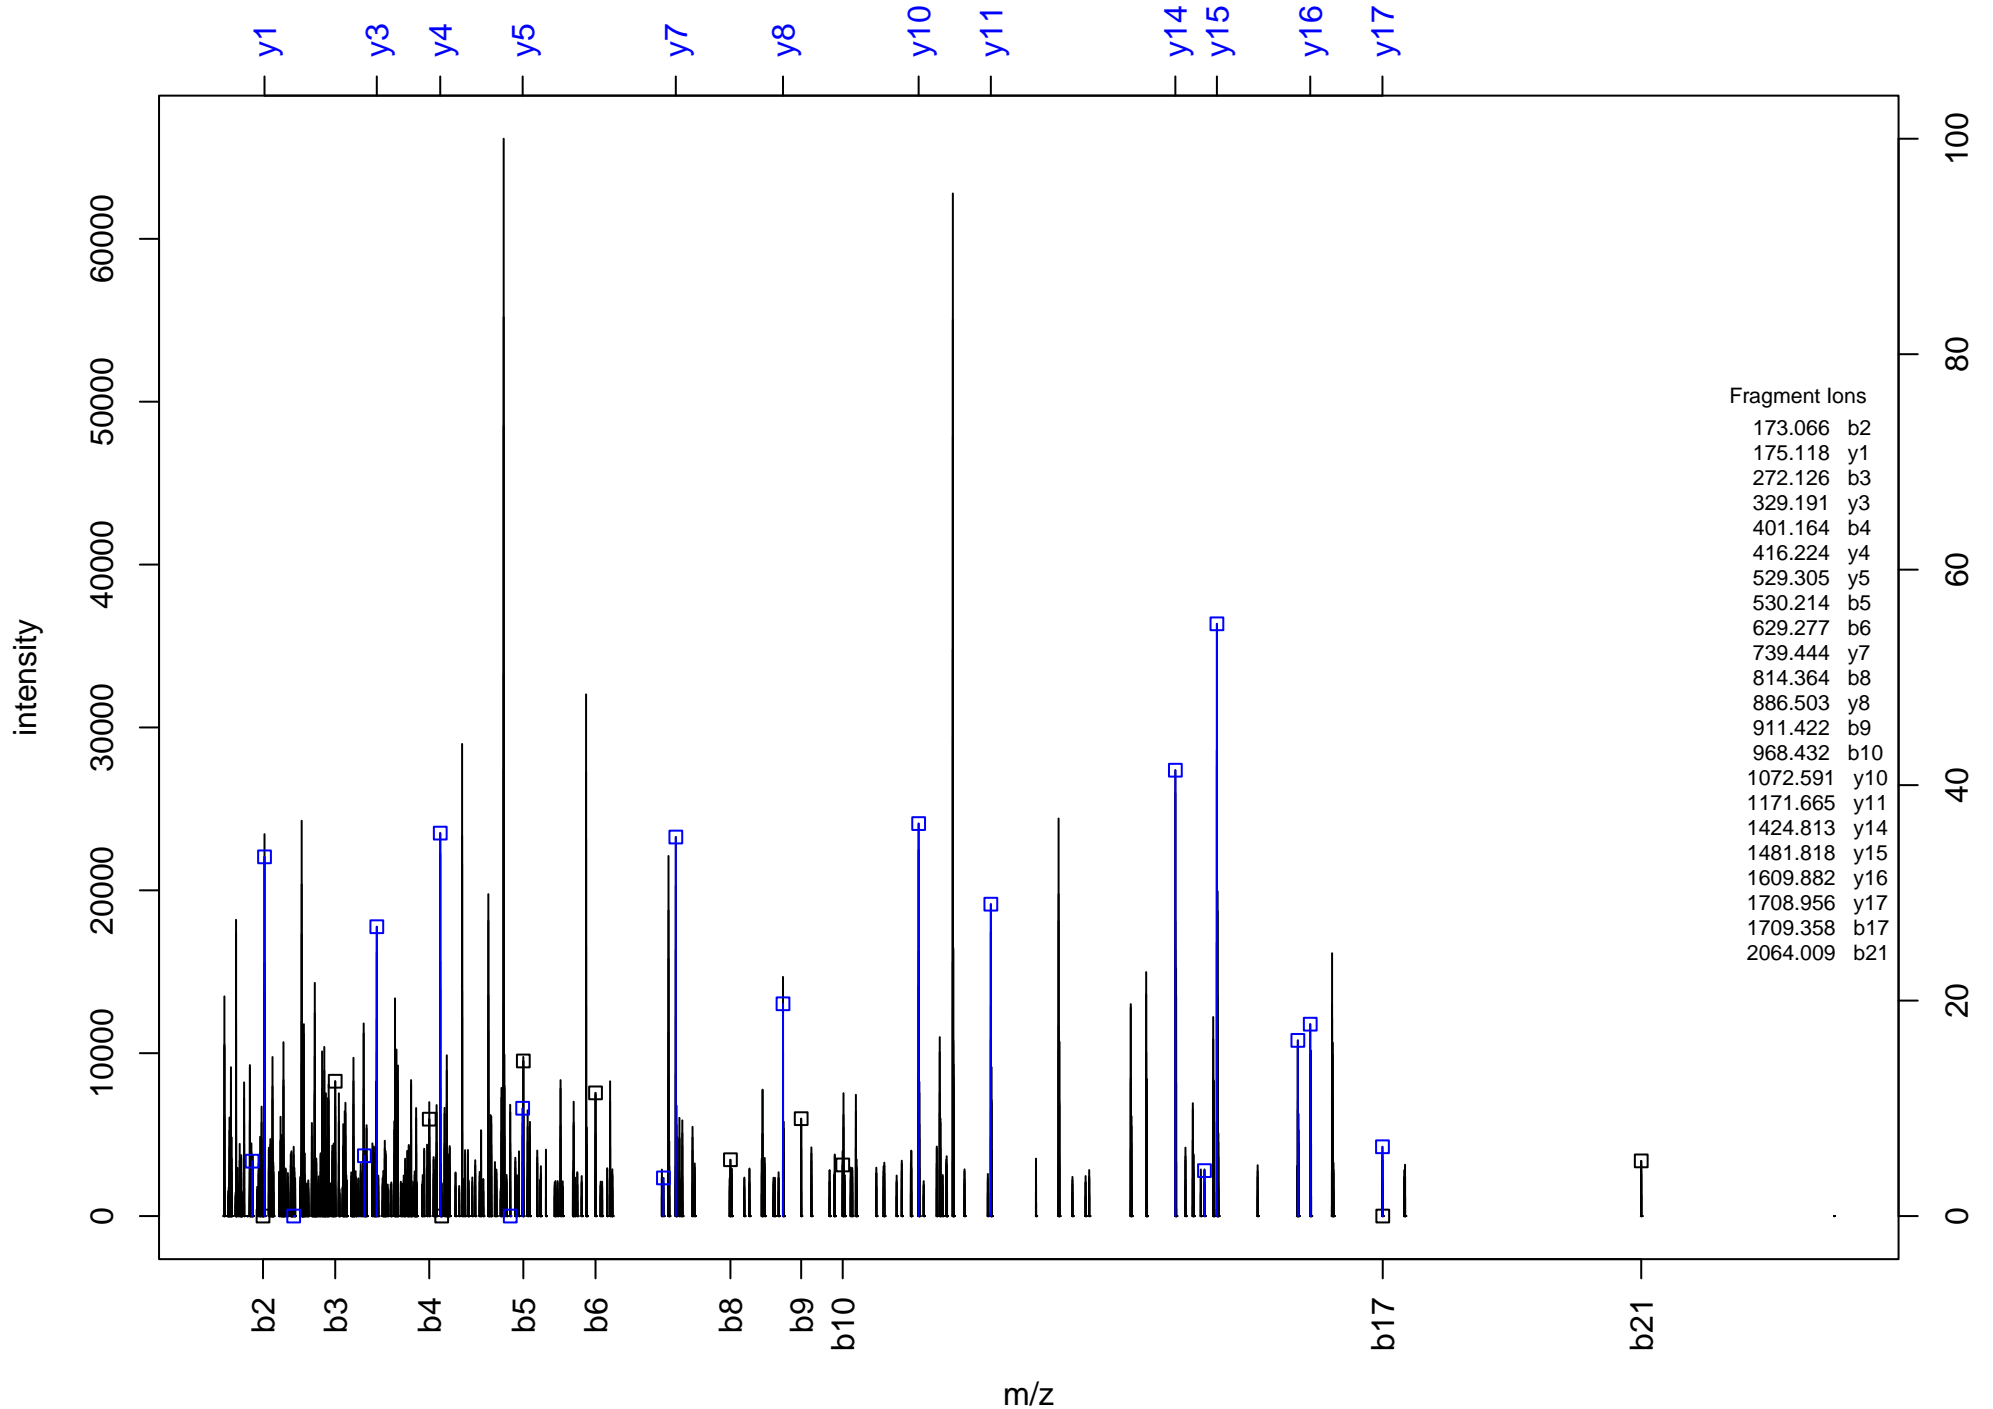

# ELTLQDVLLK

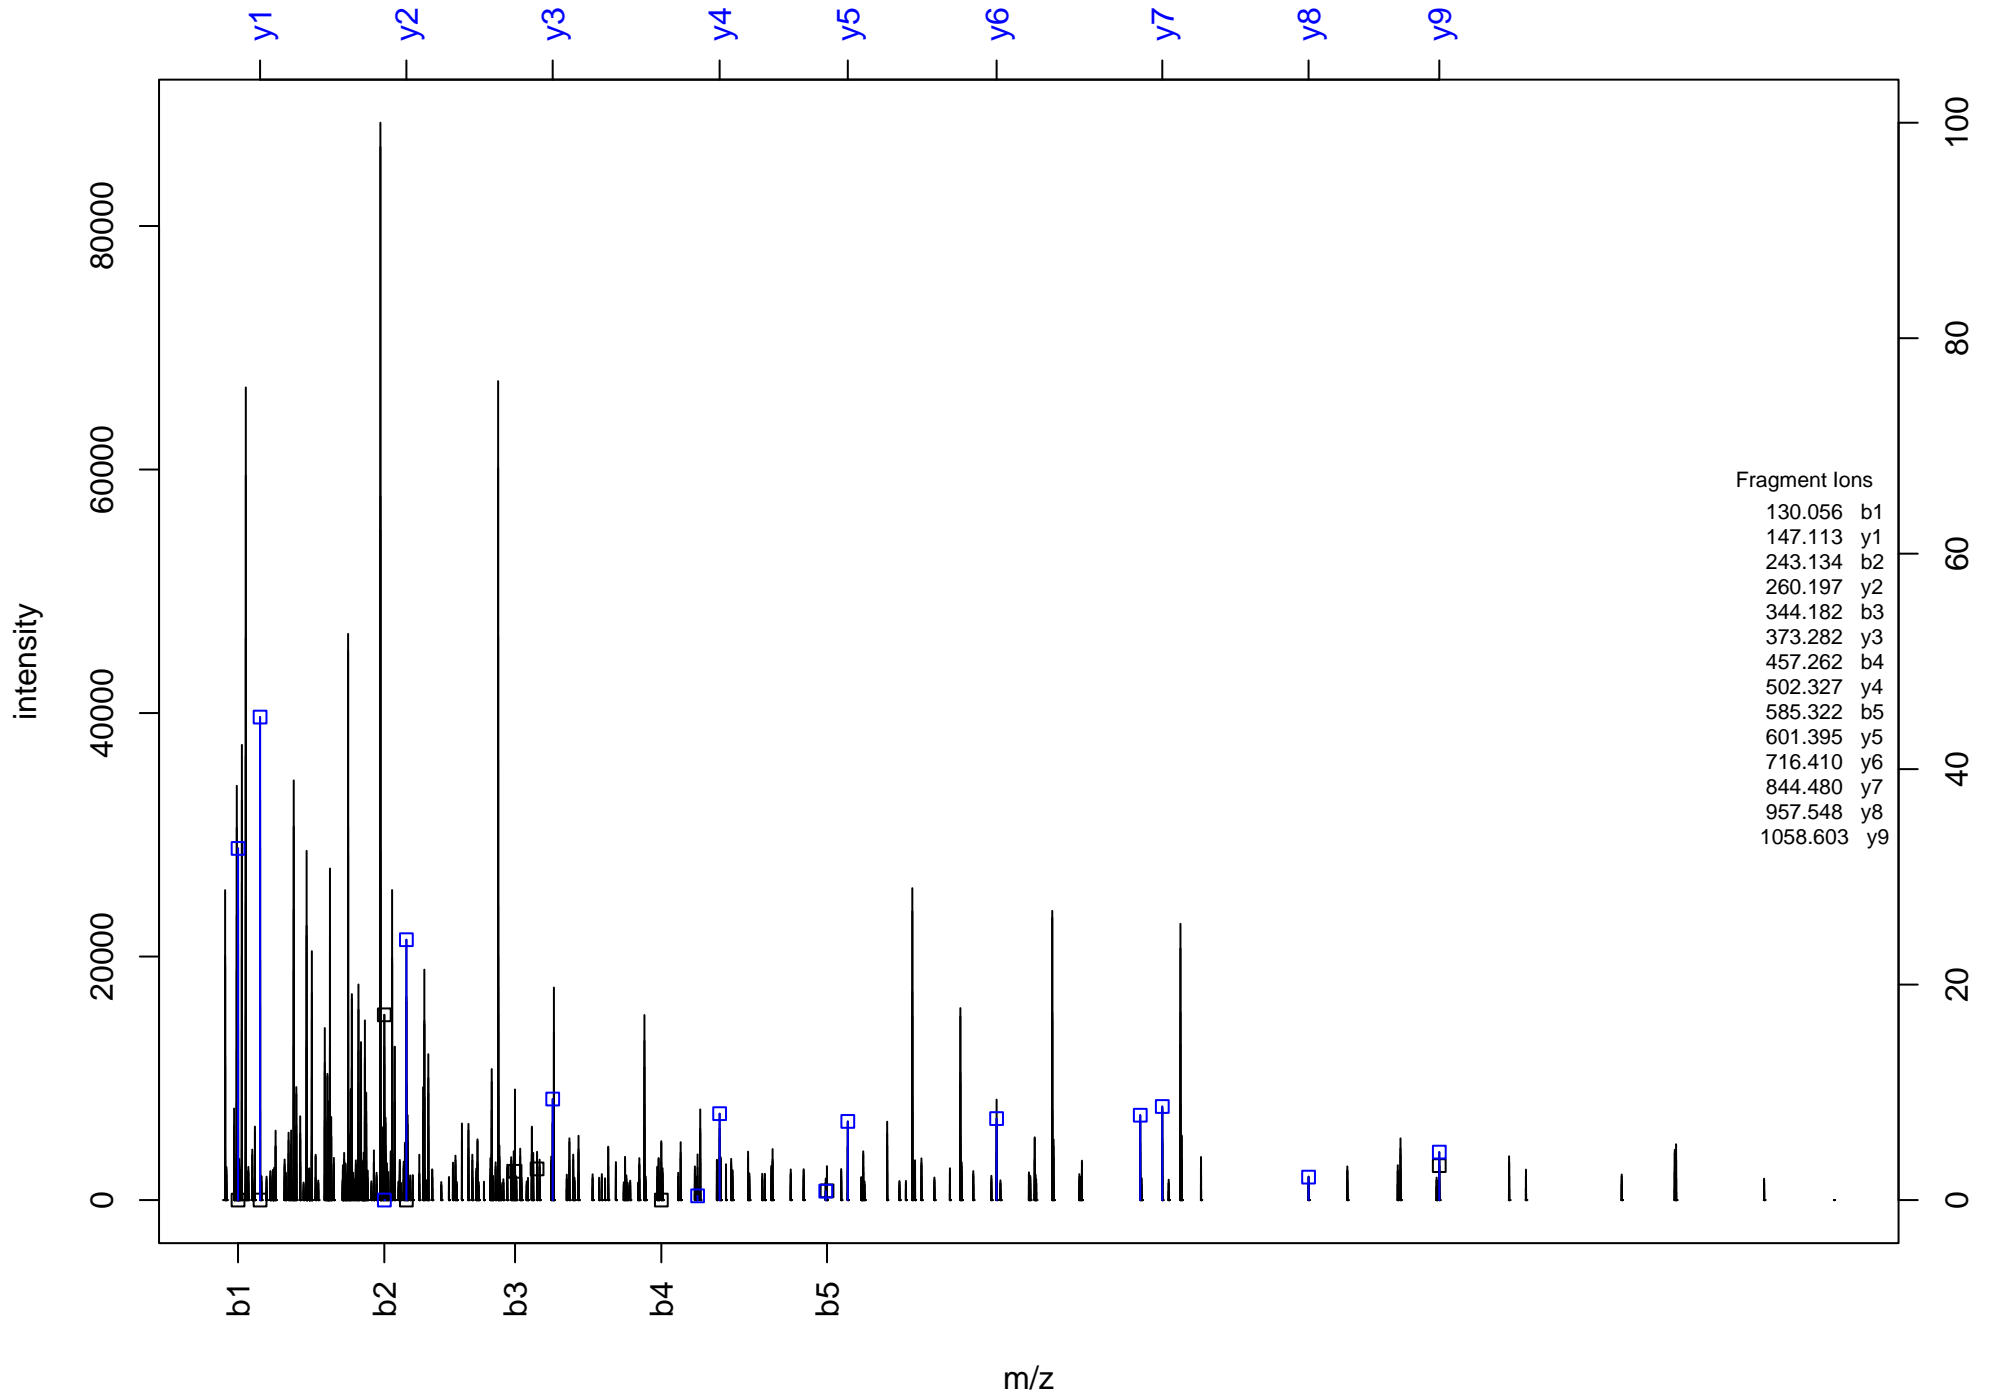

# EHPGAEDASEEQNSQSSMENSVNSSEK

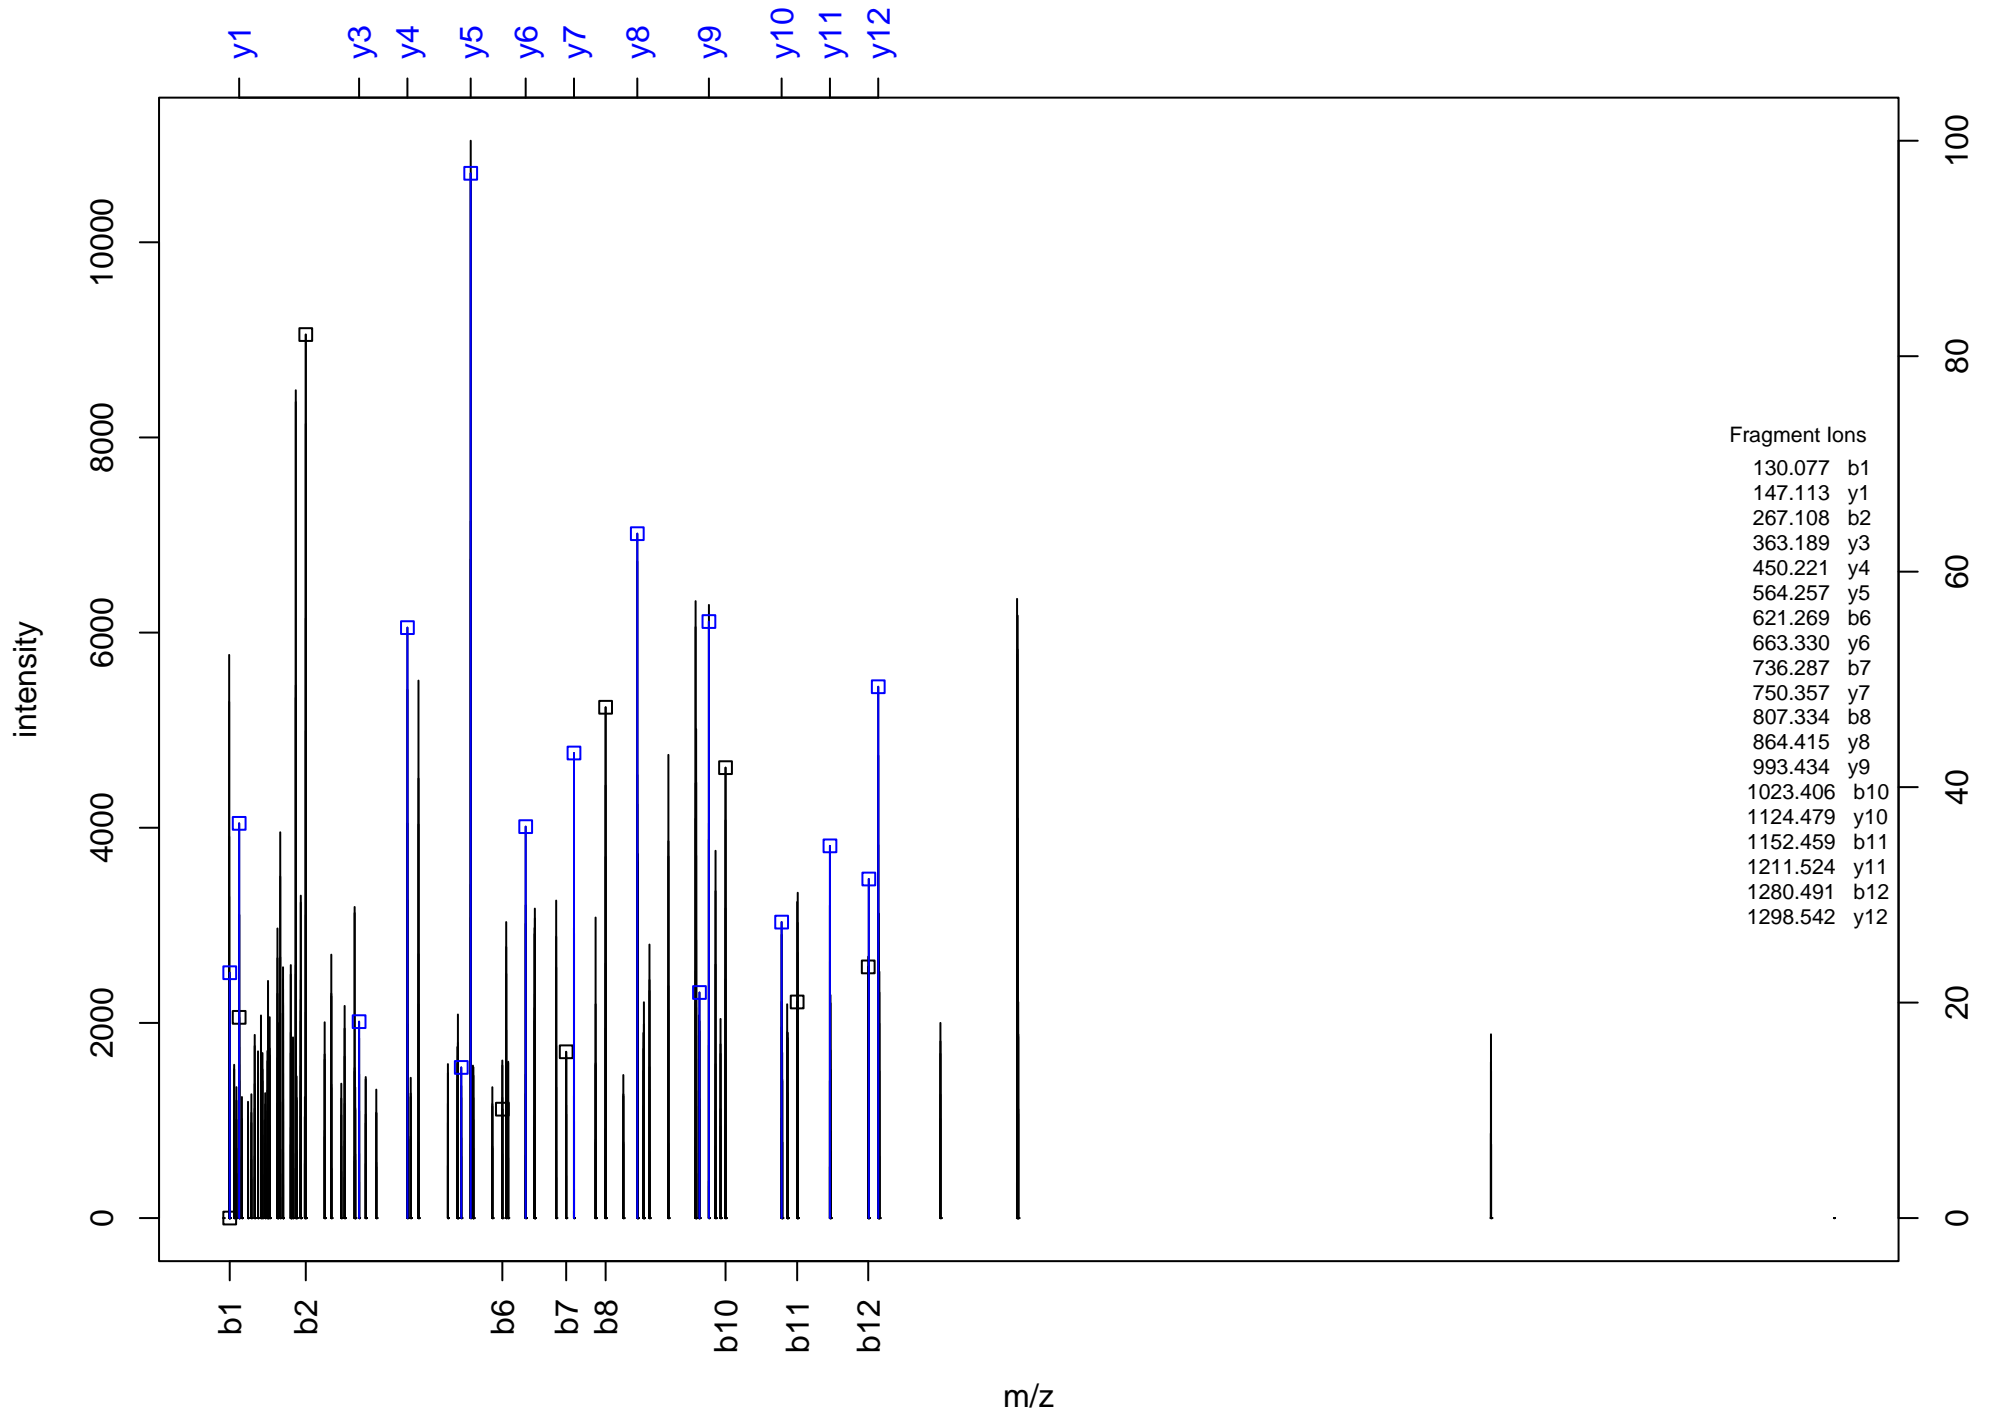



# DFISVLR

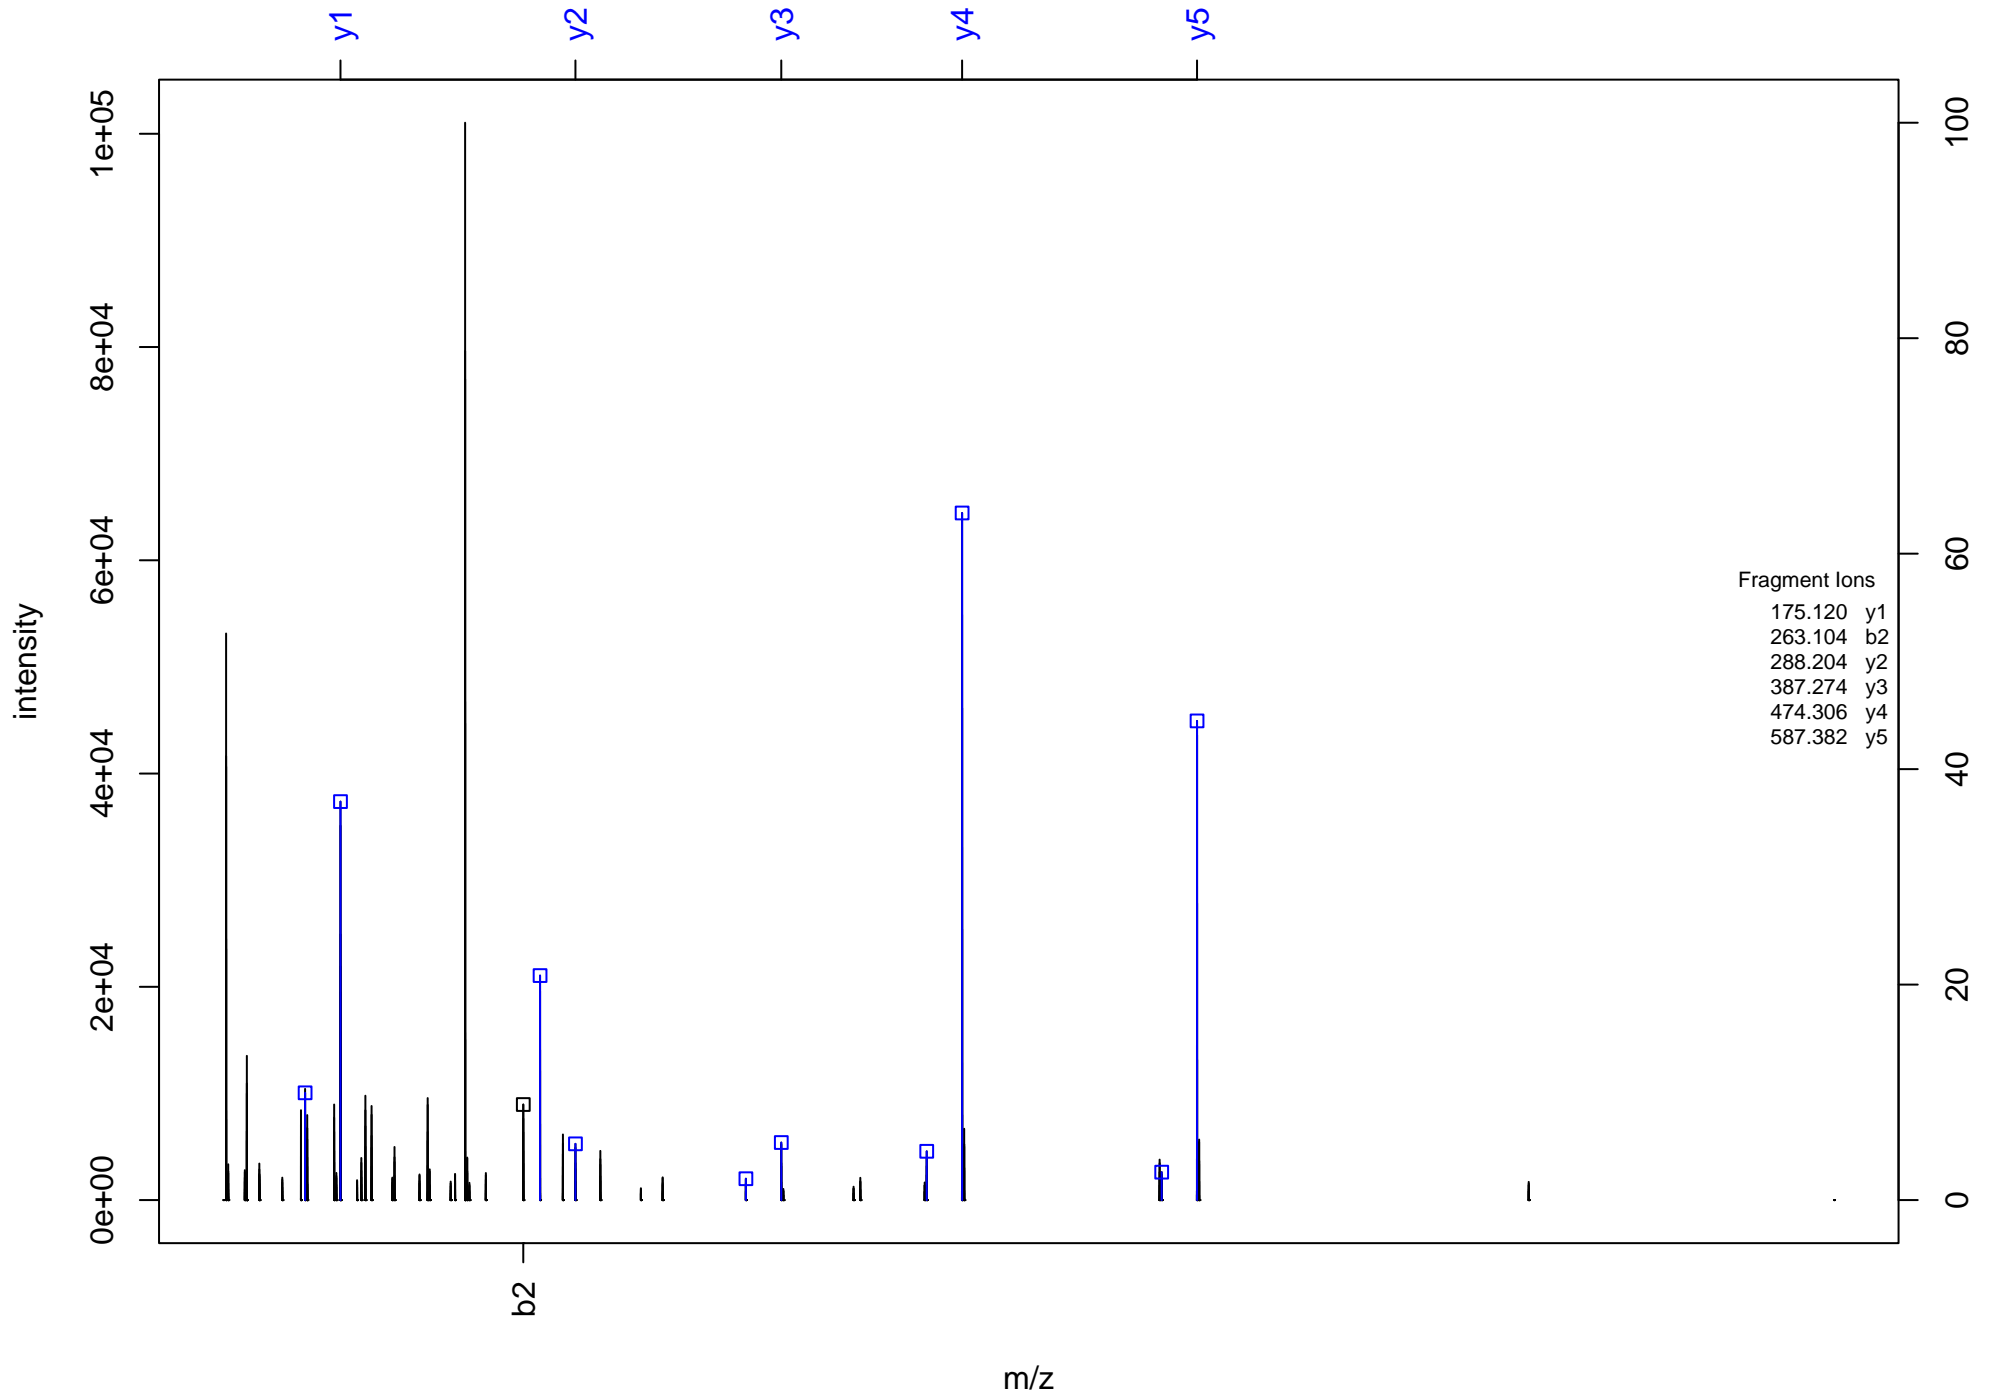

# VSEGGPAEIALGLQIGDK

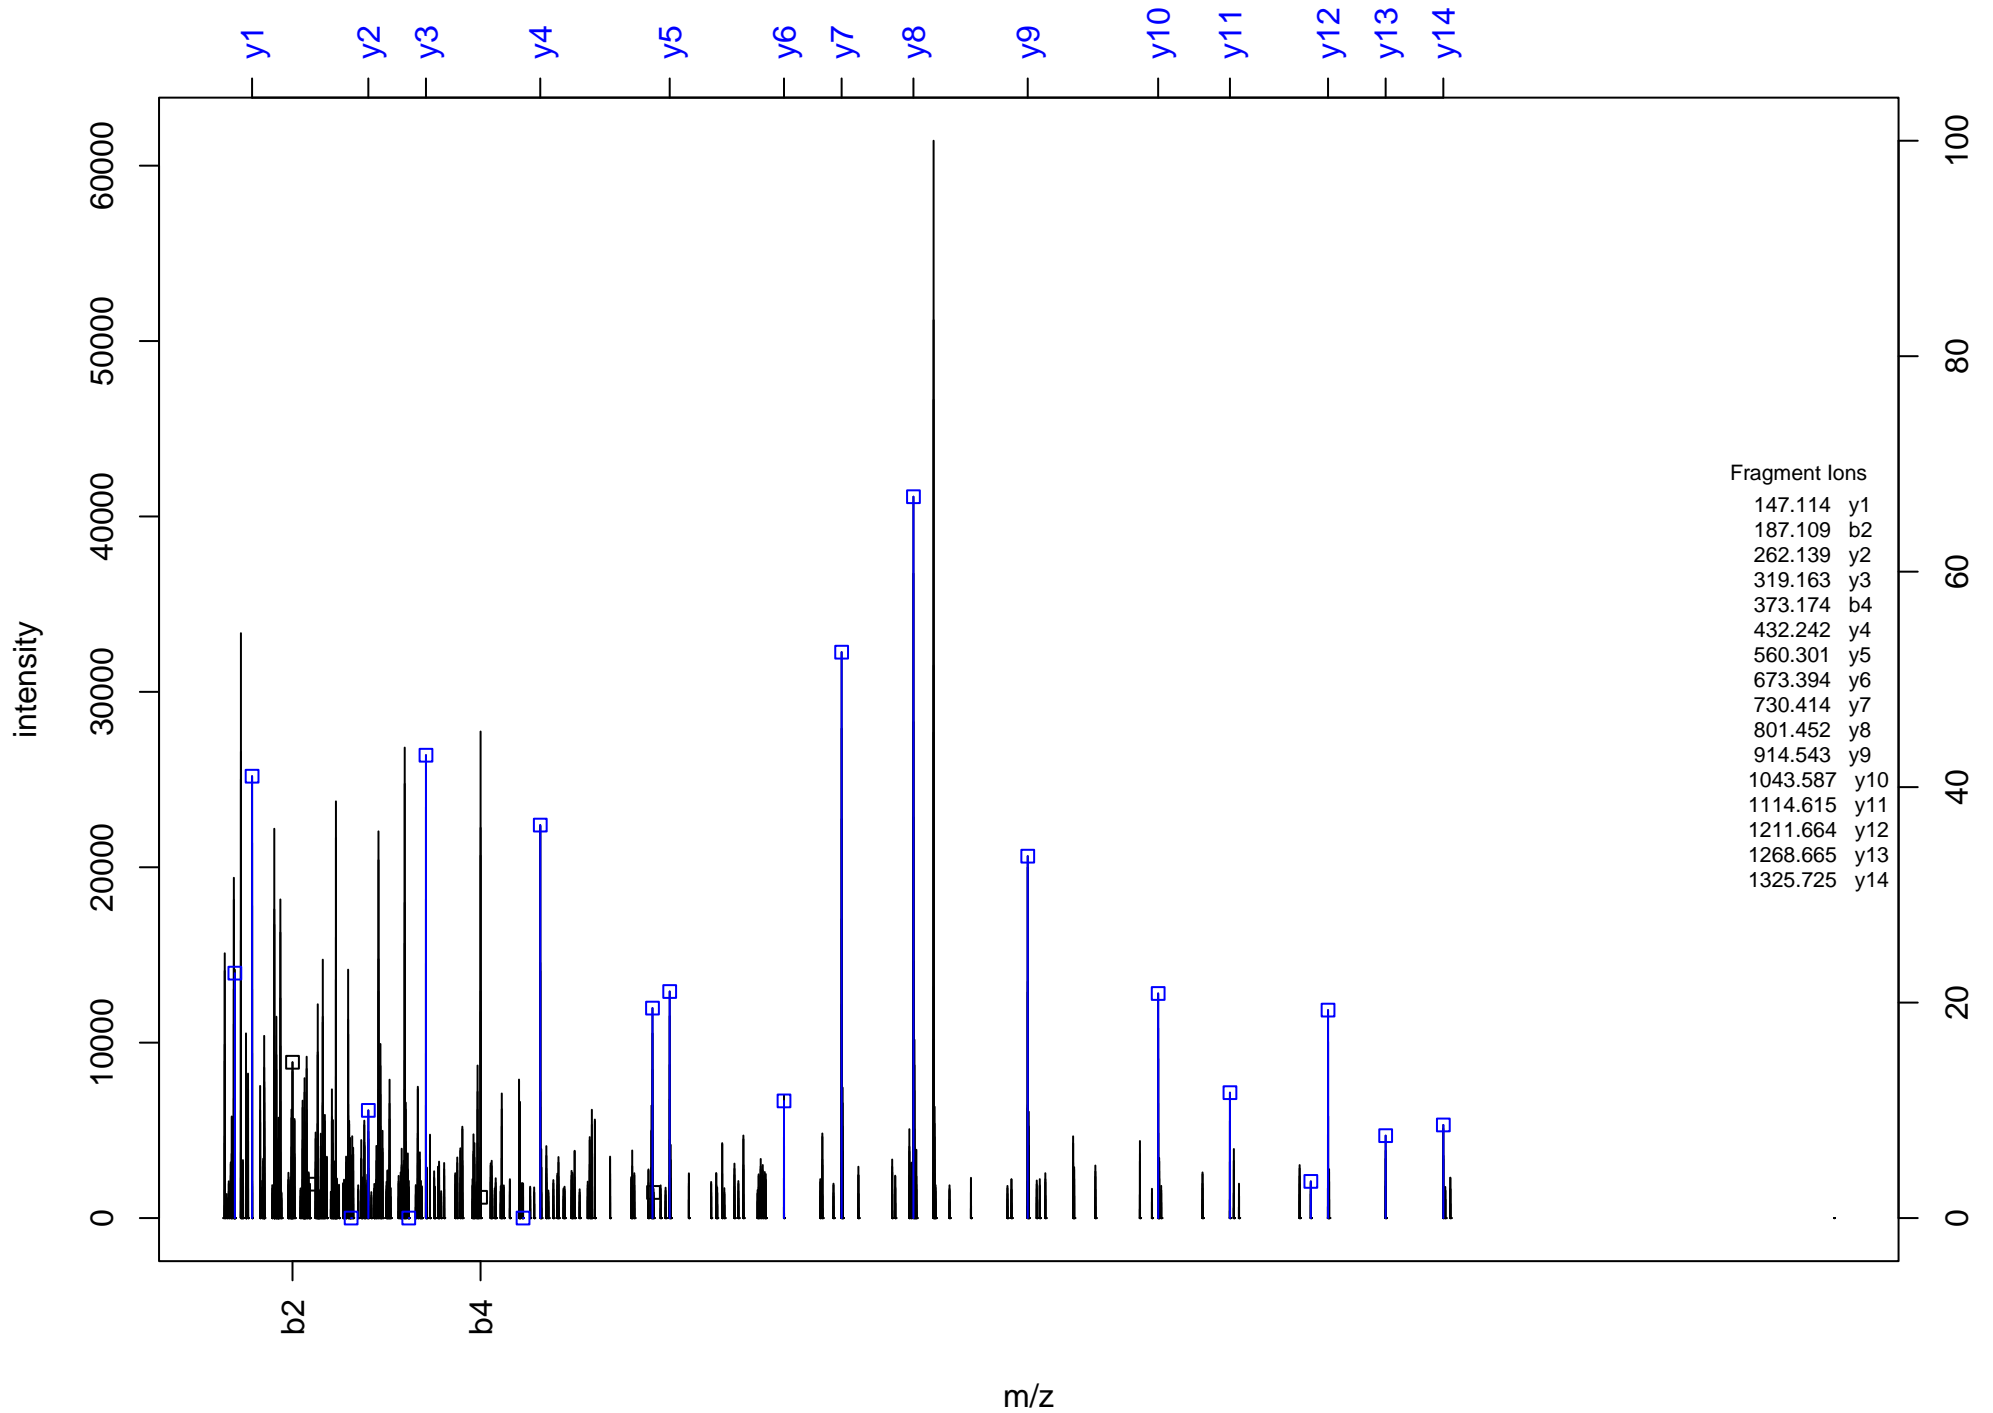

# (Ac)ADGQLPFPCSYPSR

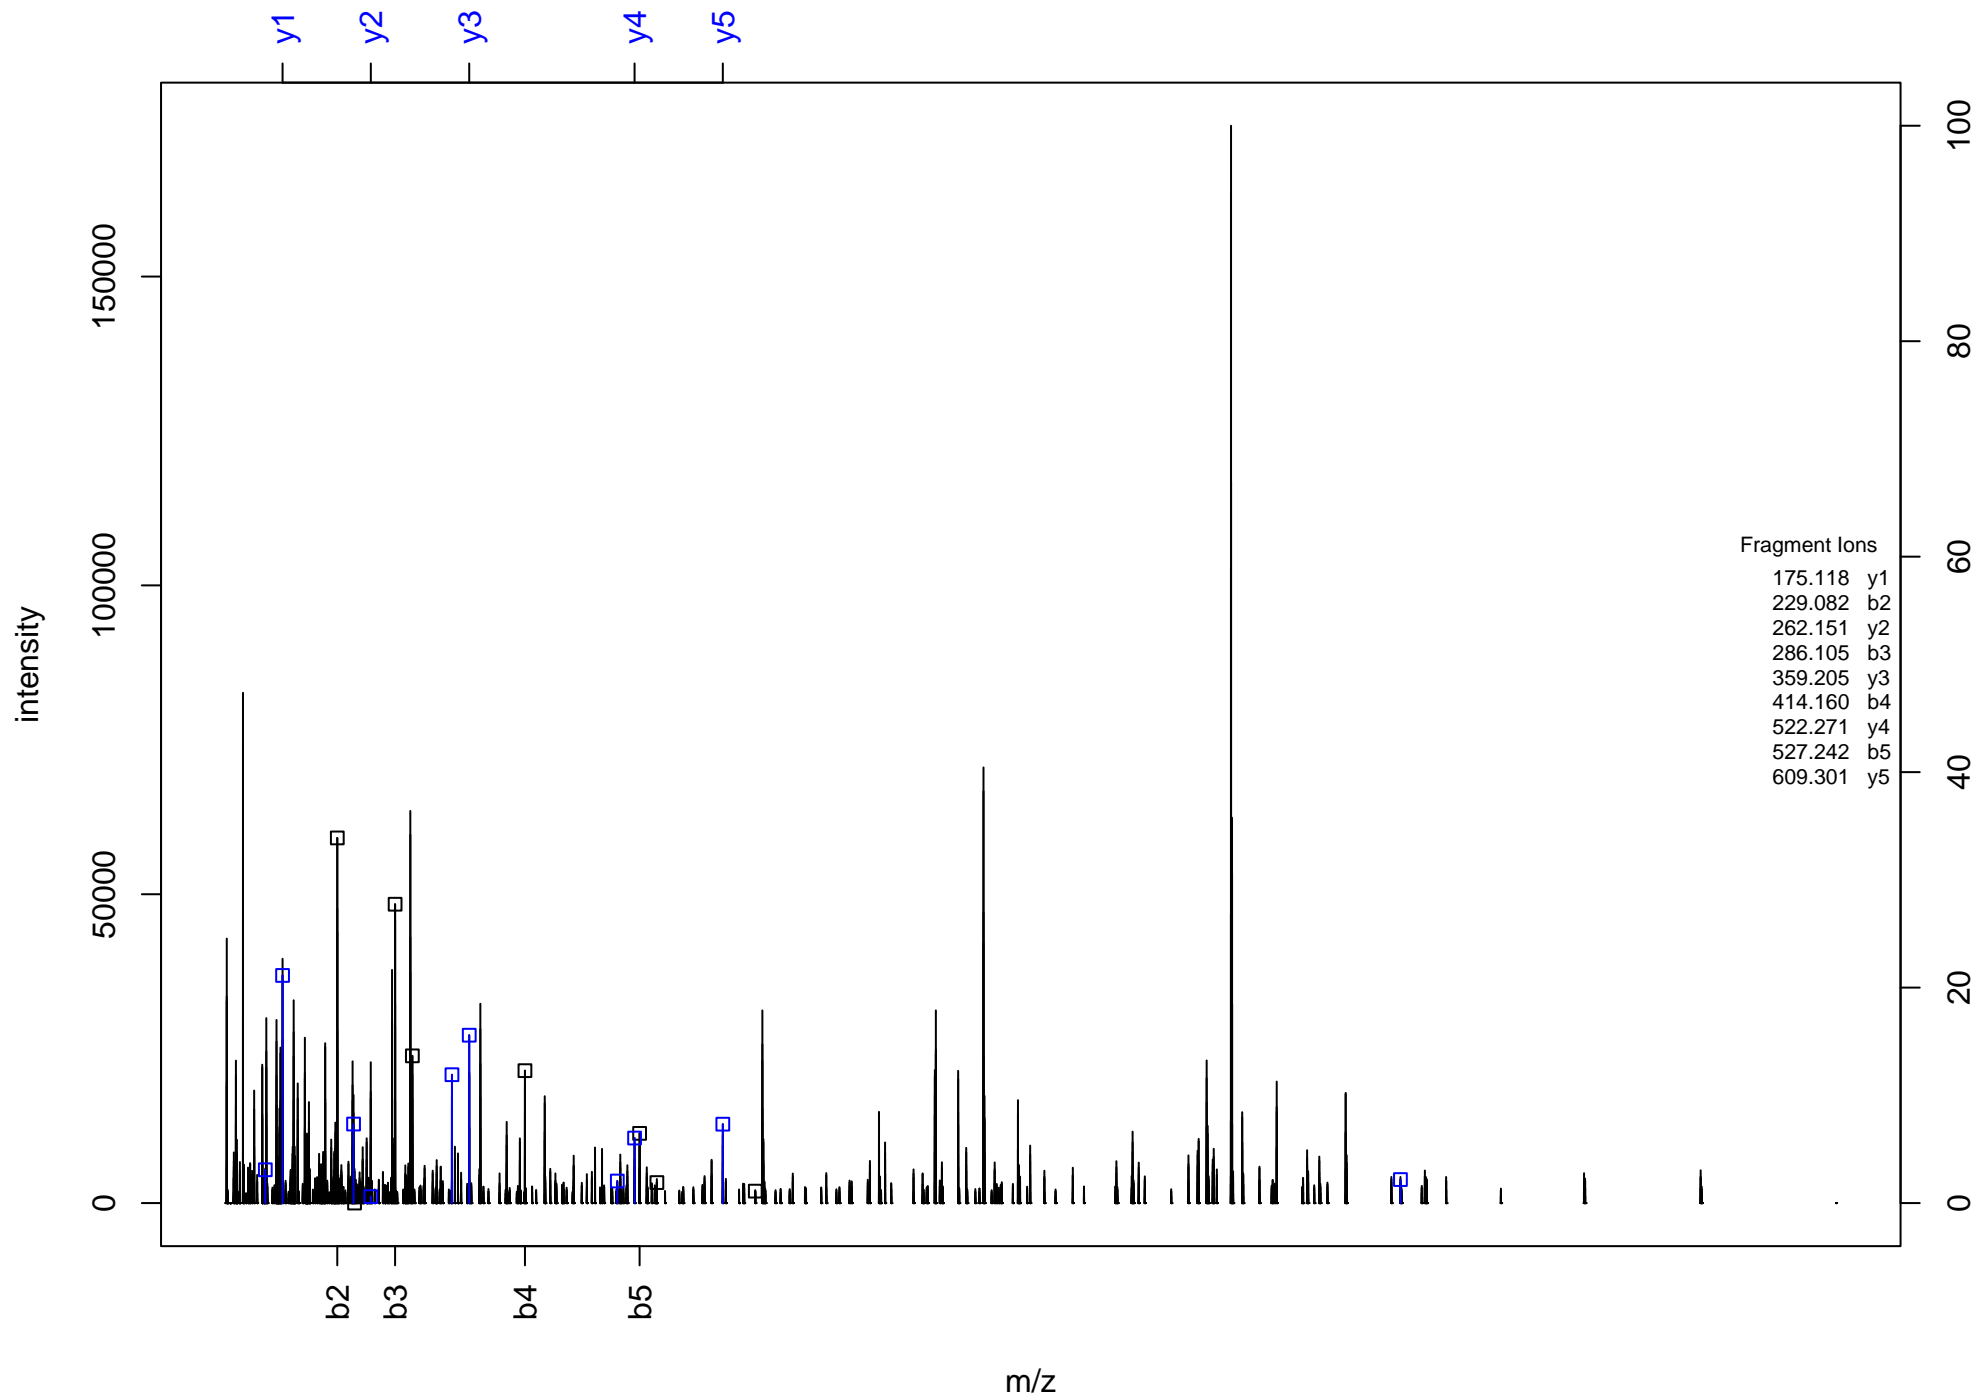

# EGLN^GGGGGGGIHFDSPFEGFTFR

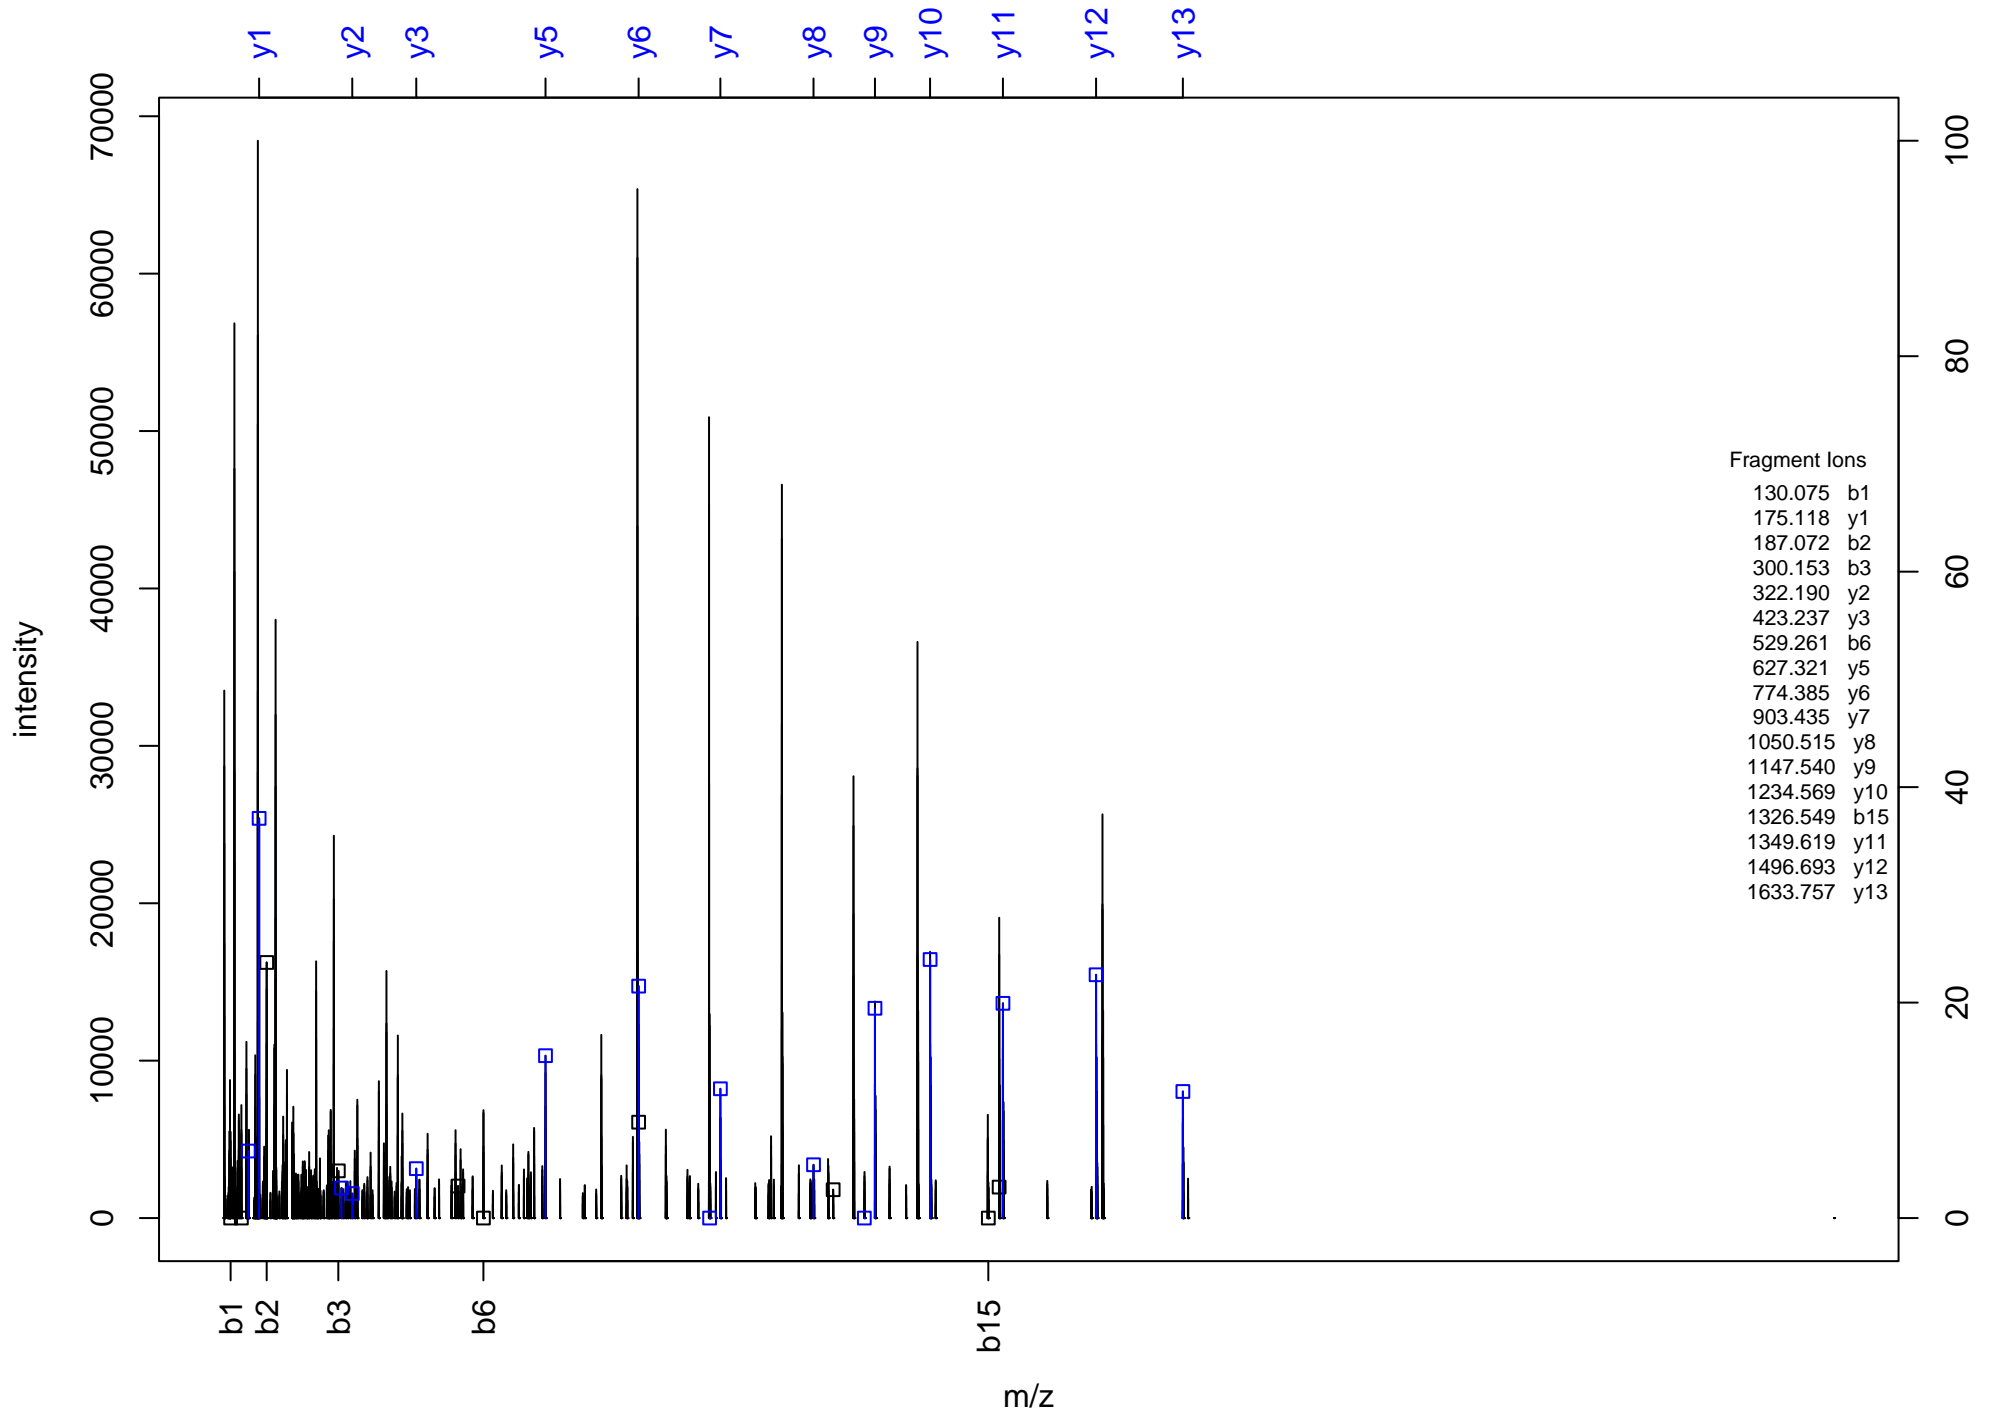

# LLGSTIPLCSAQWER

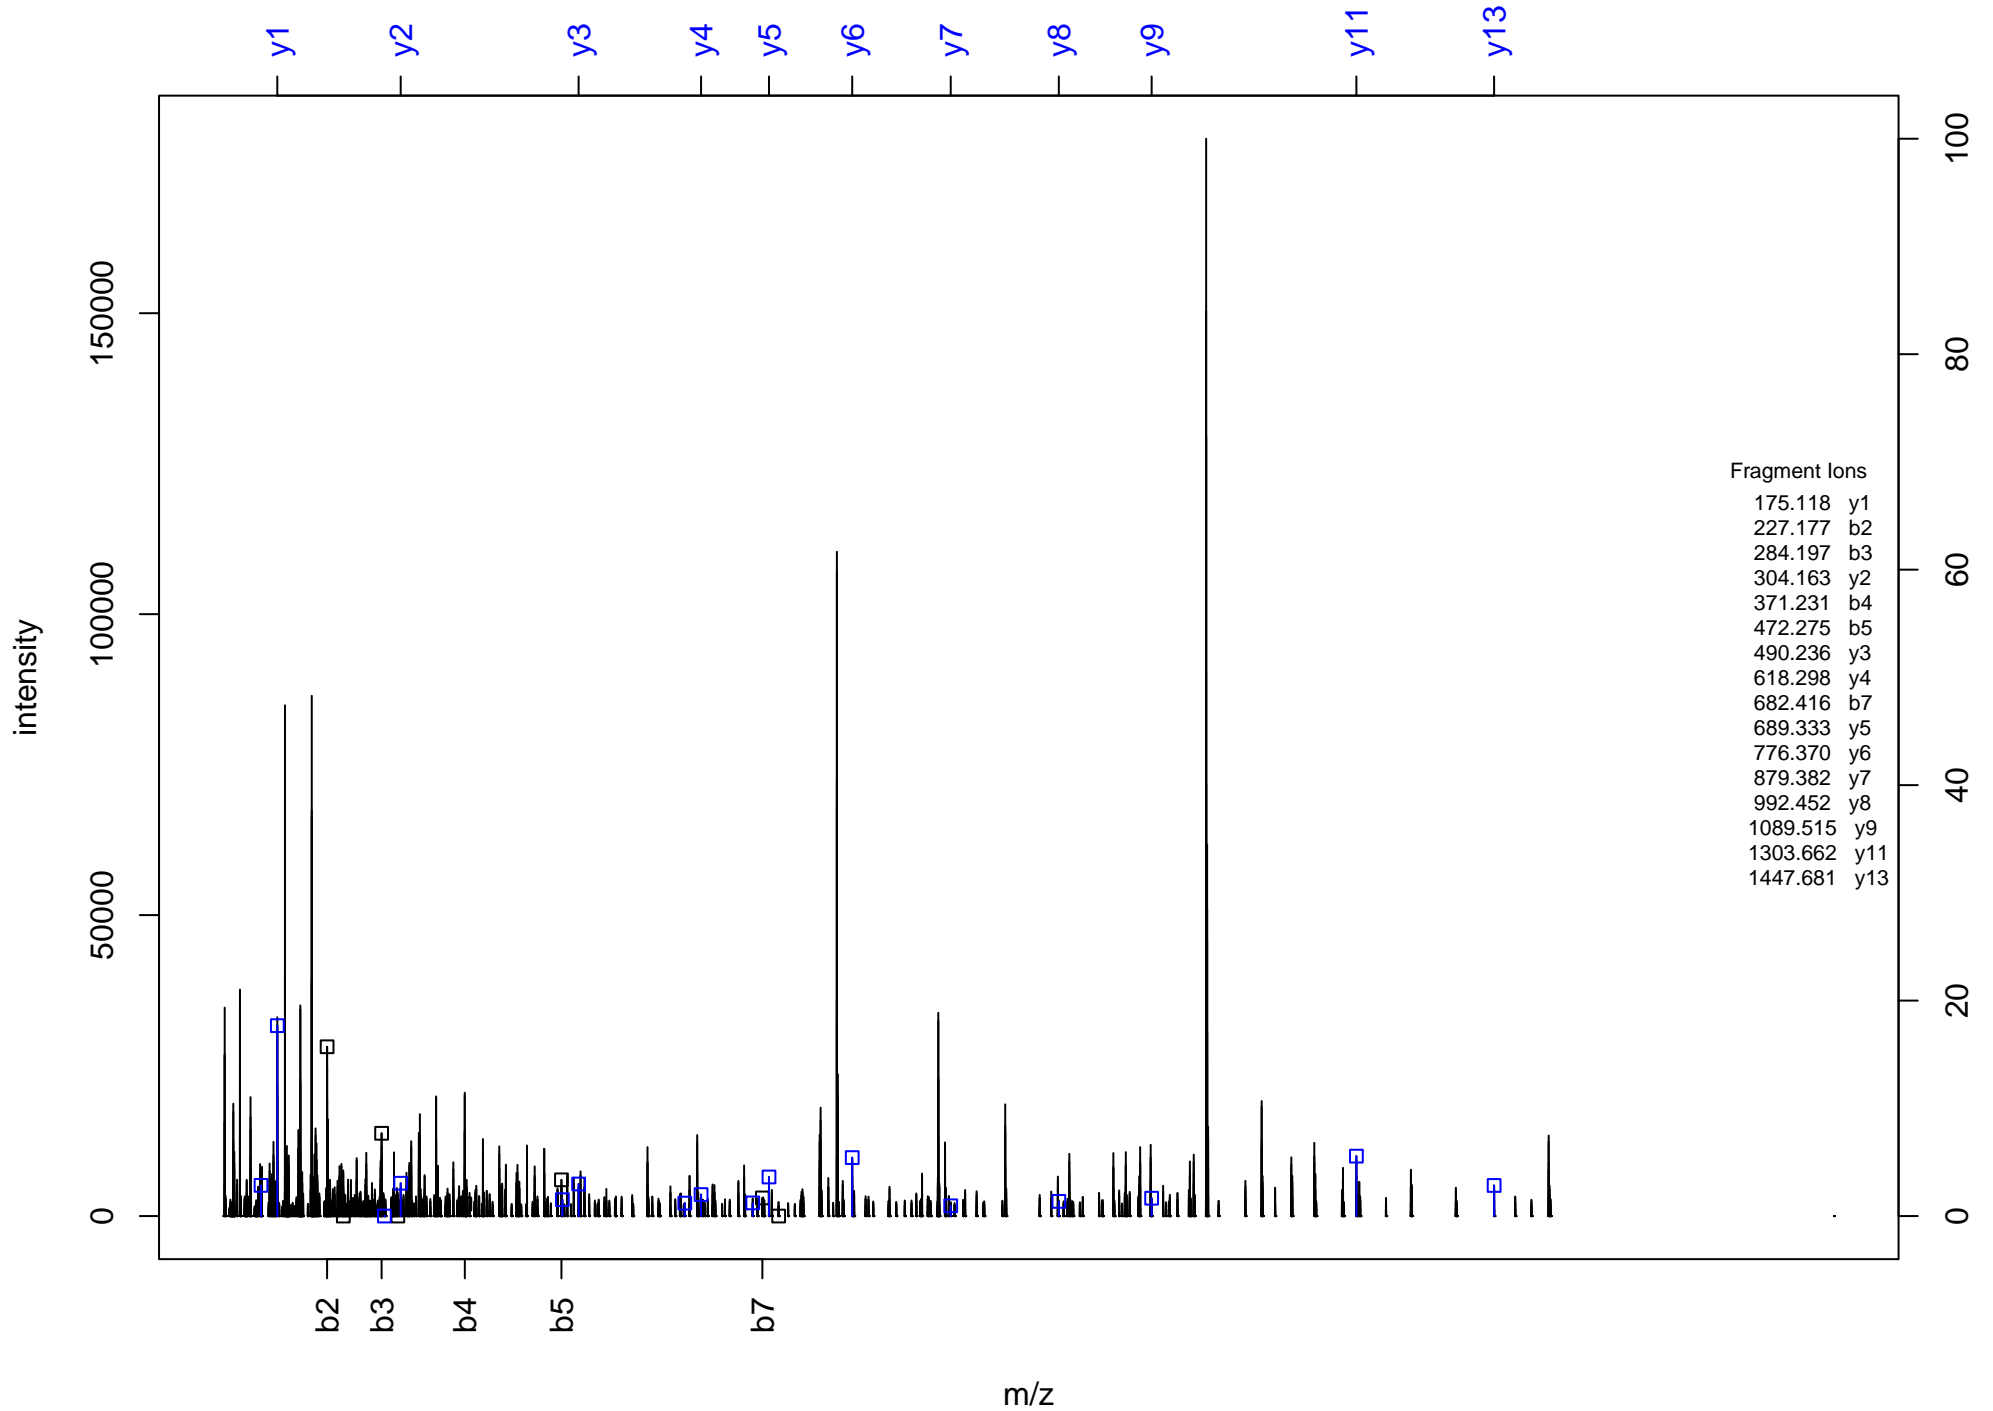

# LADIQIEQLNR

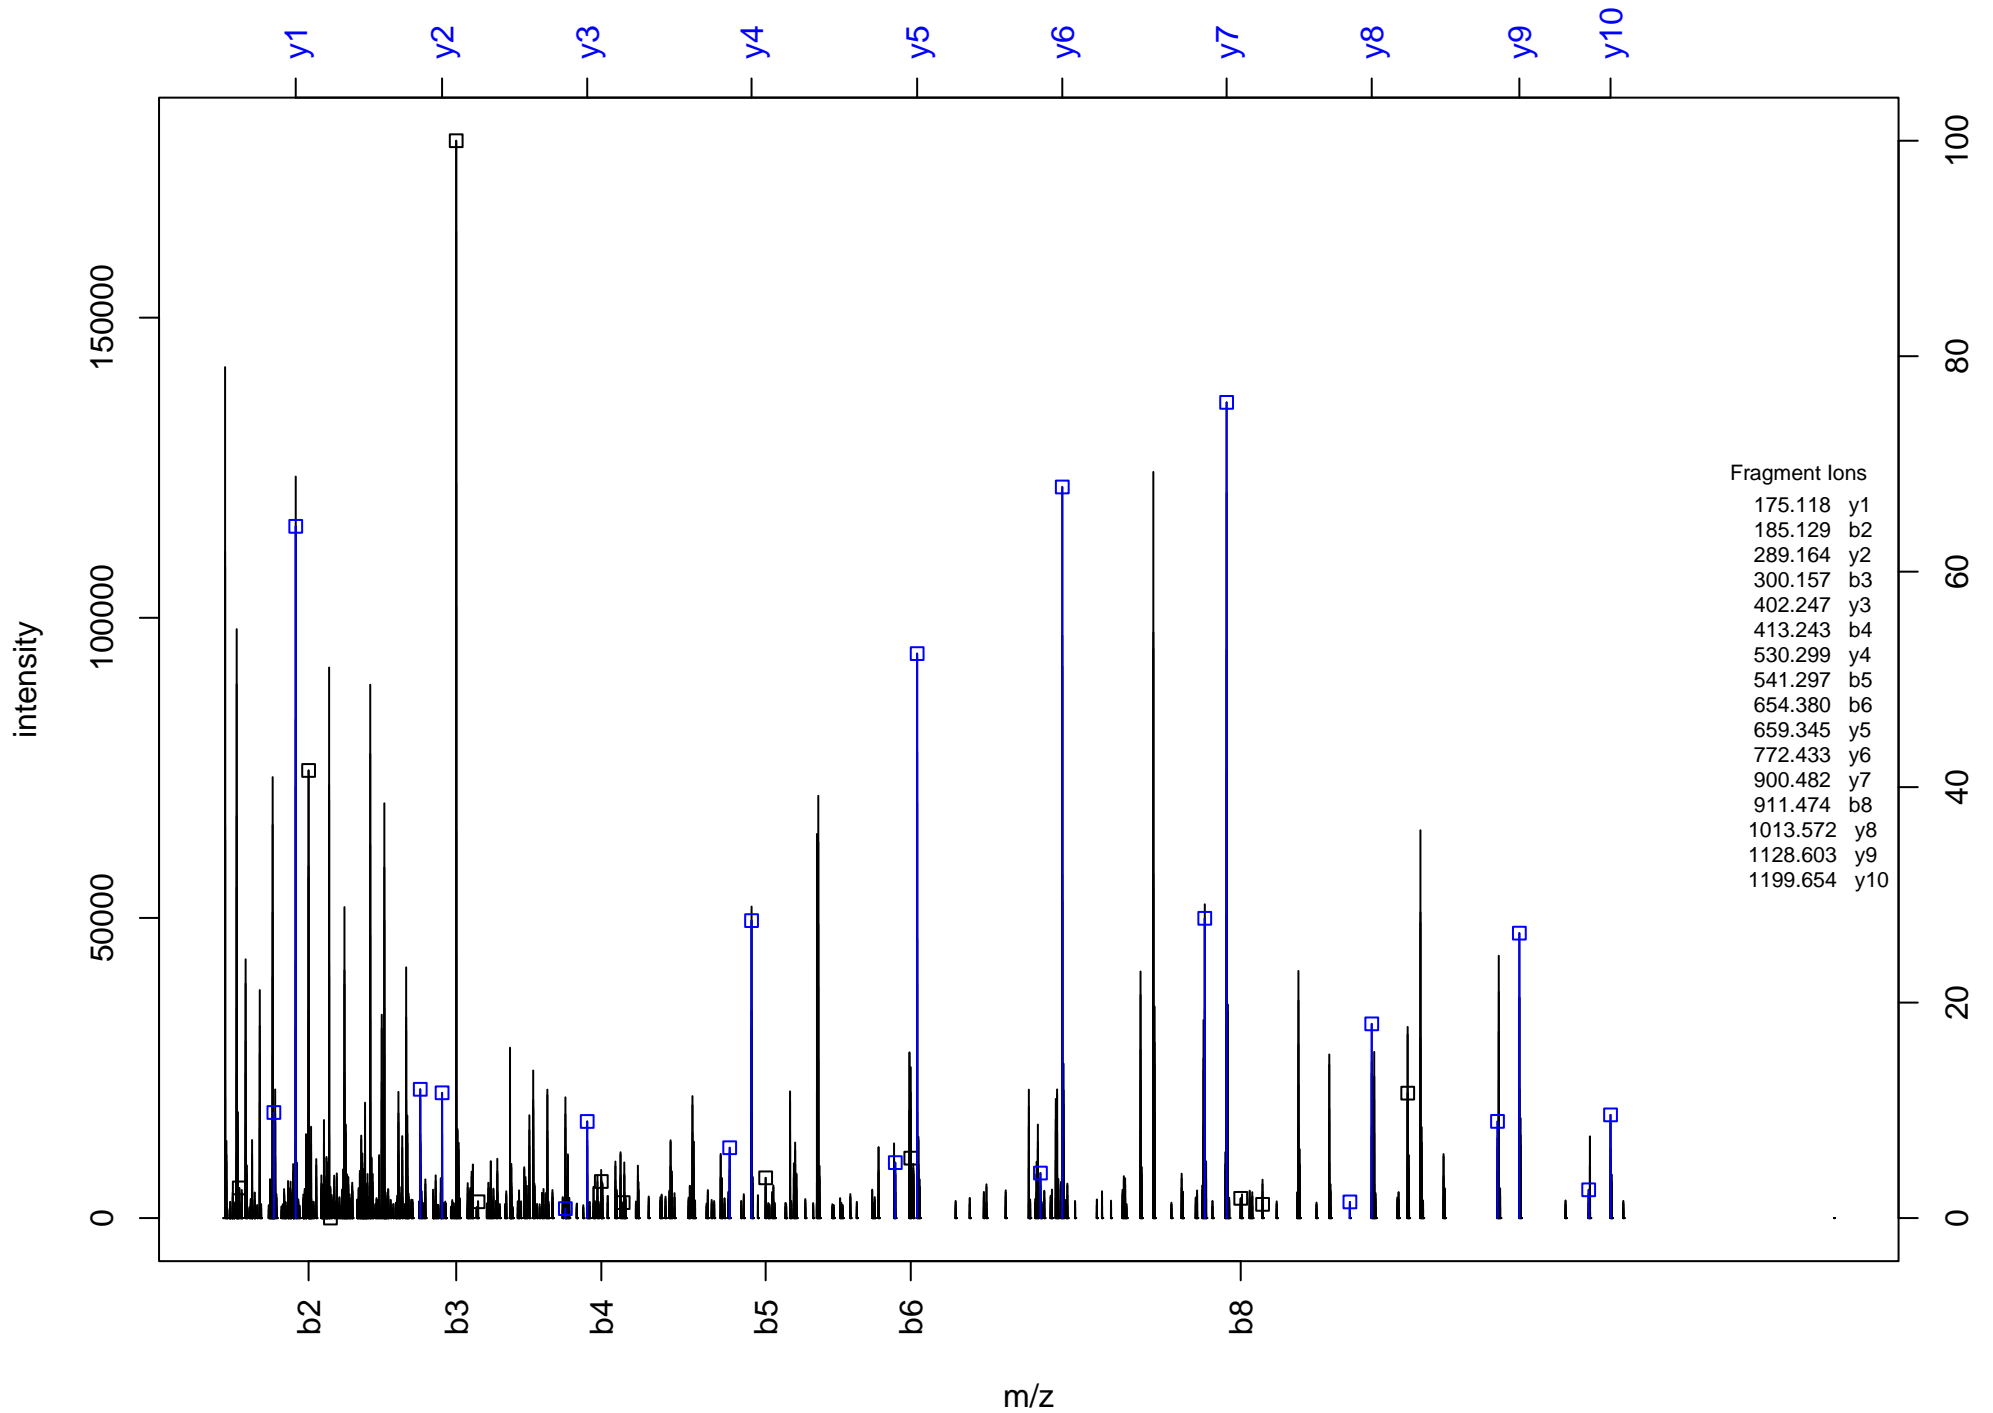

# DGNLANNPYSGDVTK

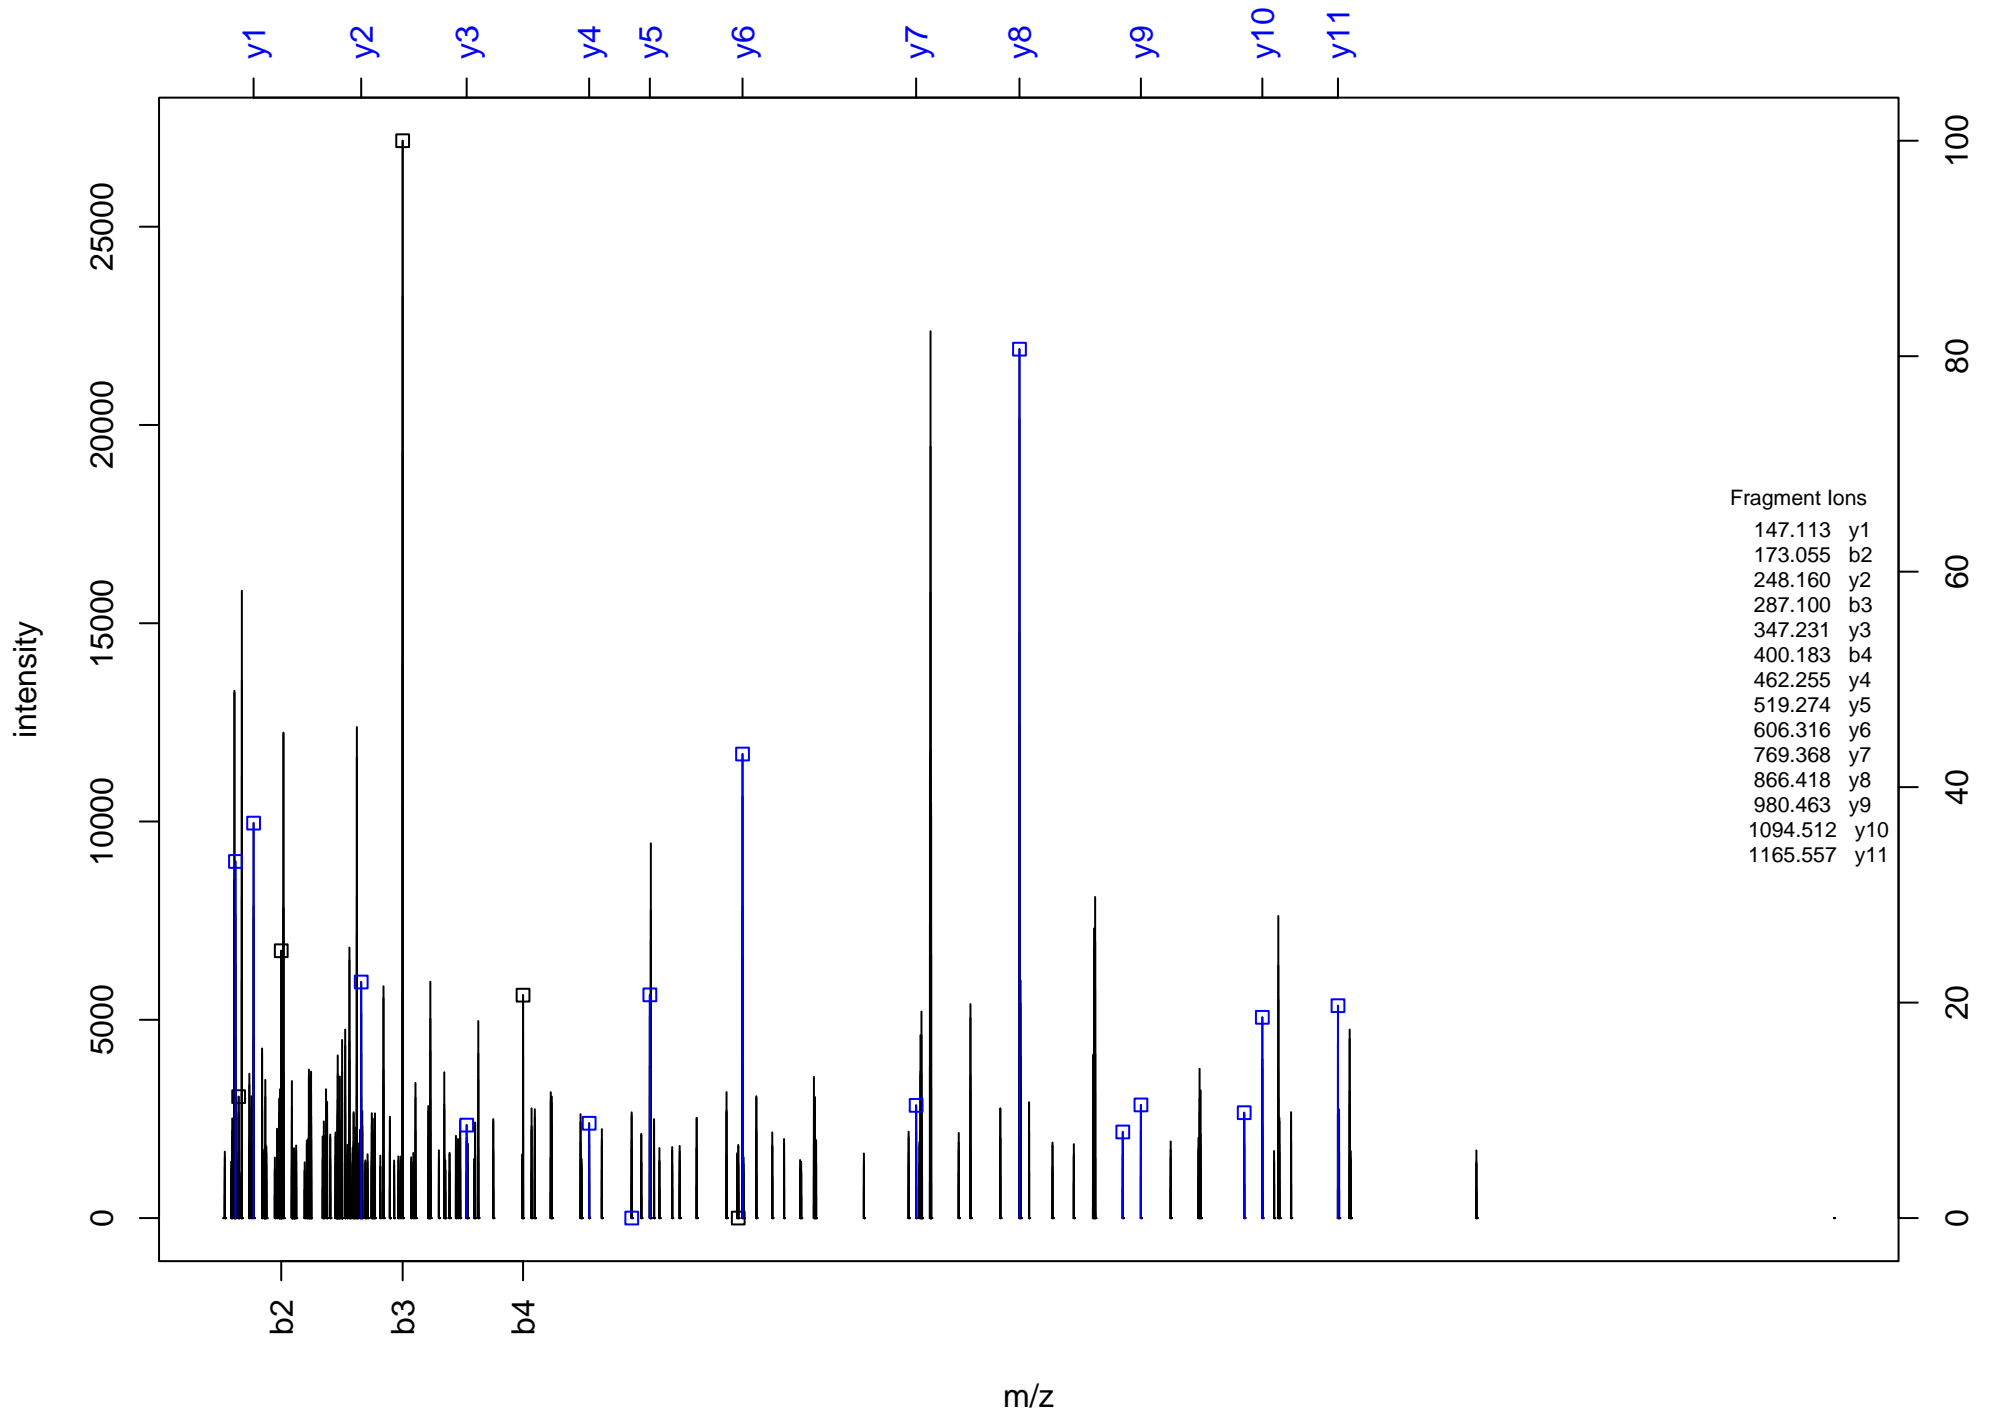

# ILTTDGLTEVISR

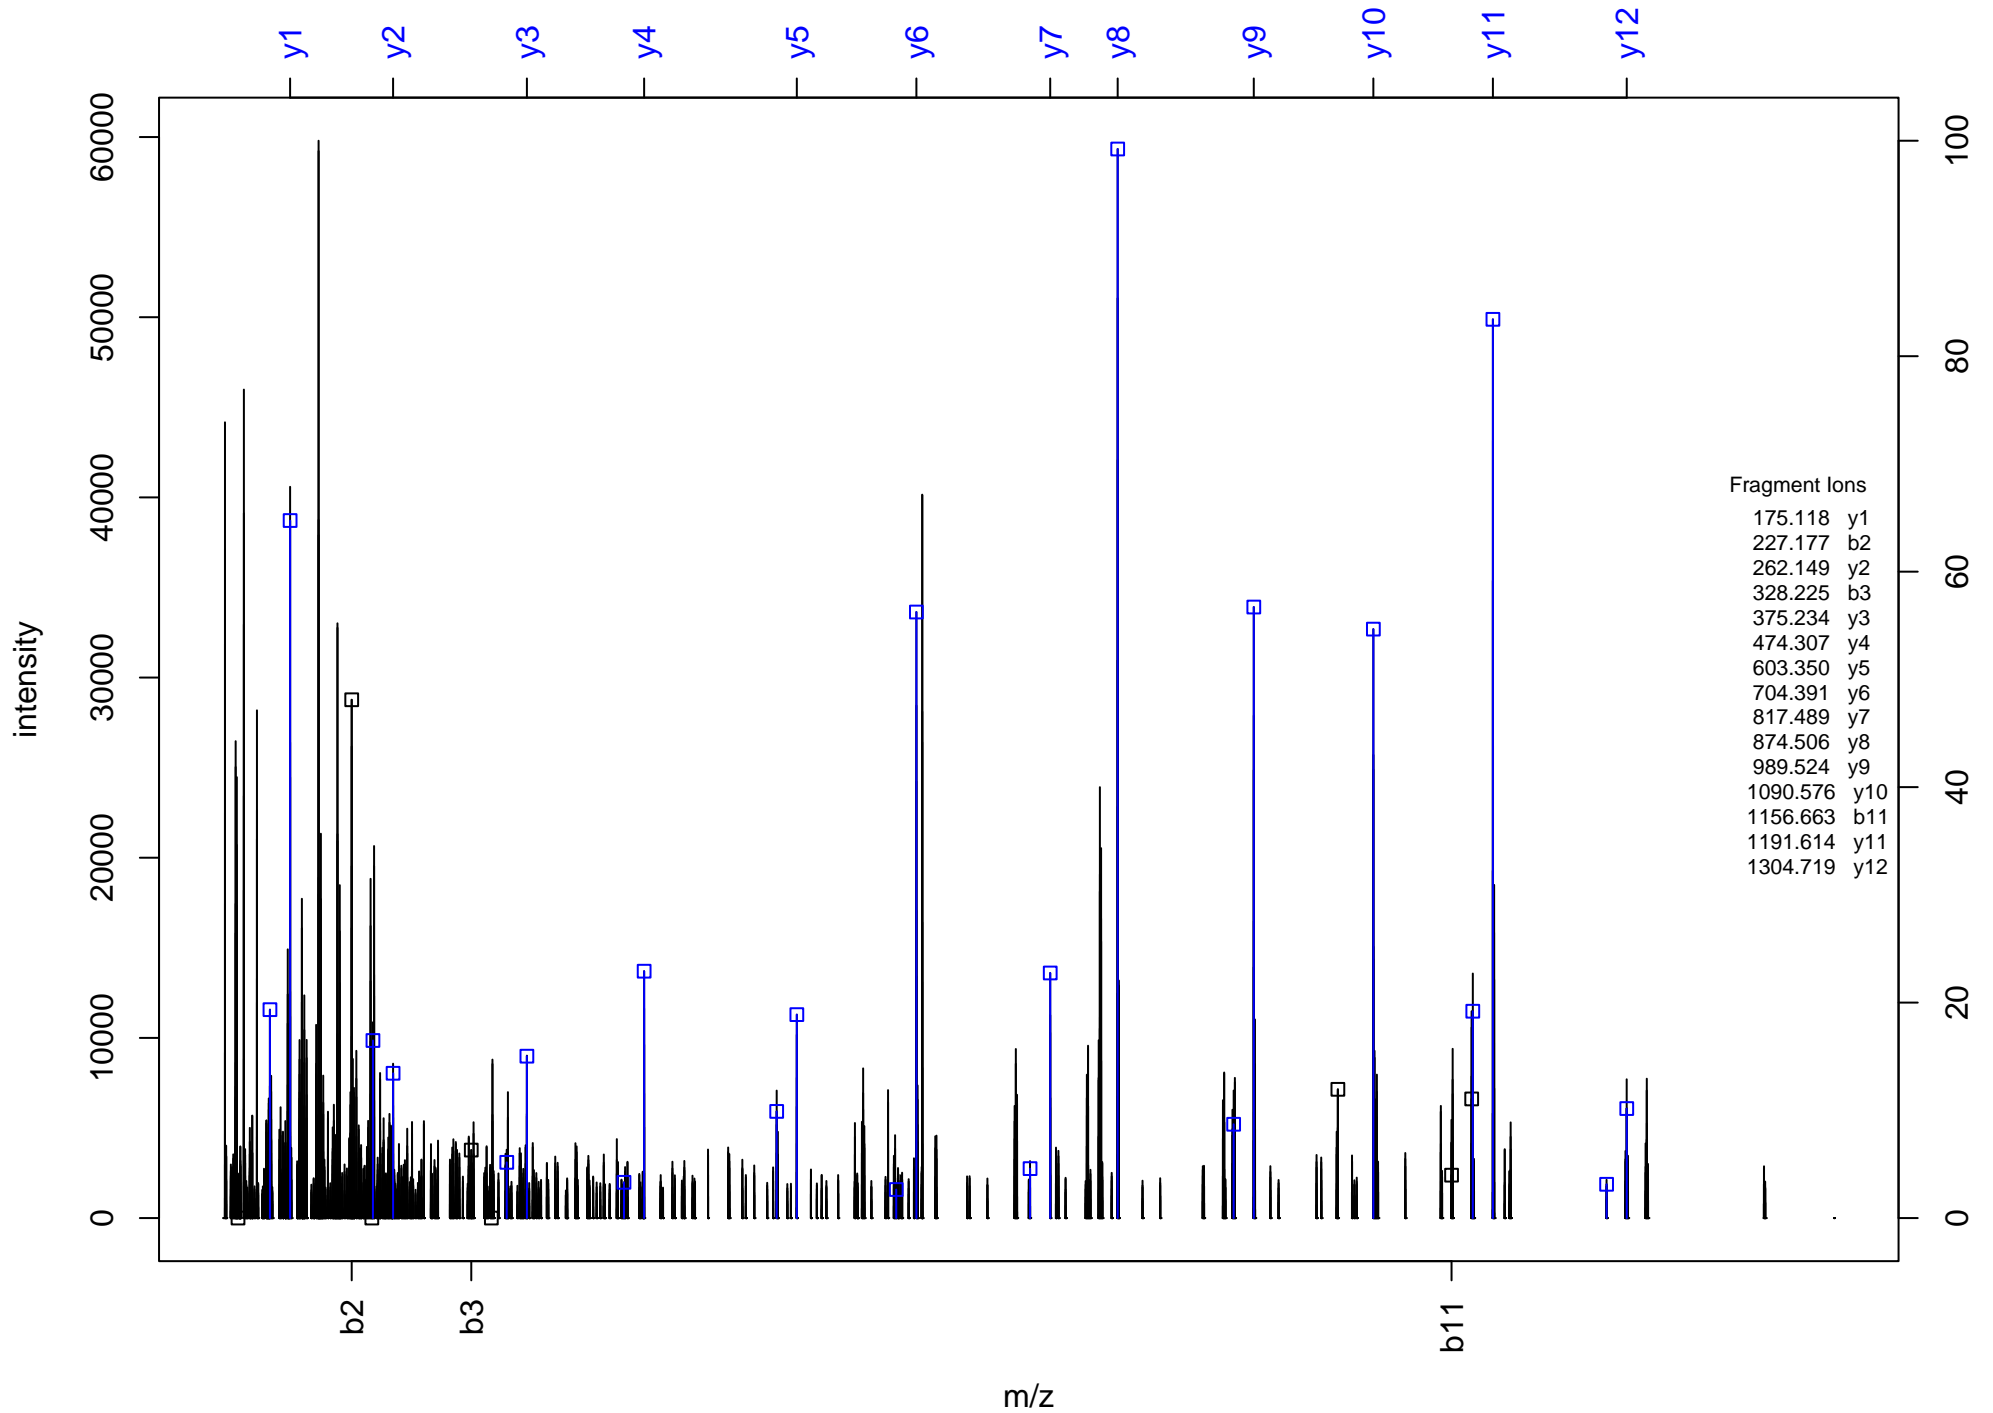



# TLAILQIESEK

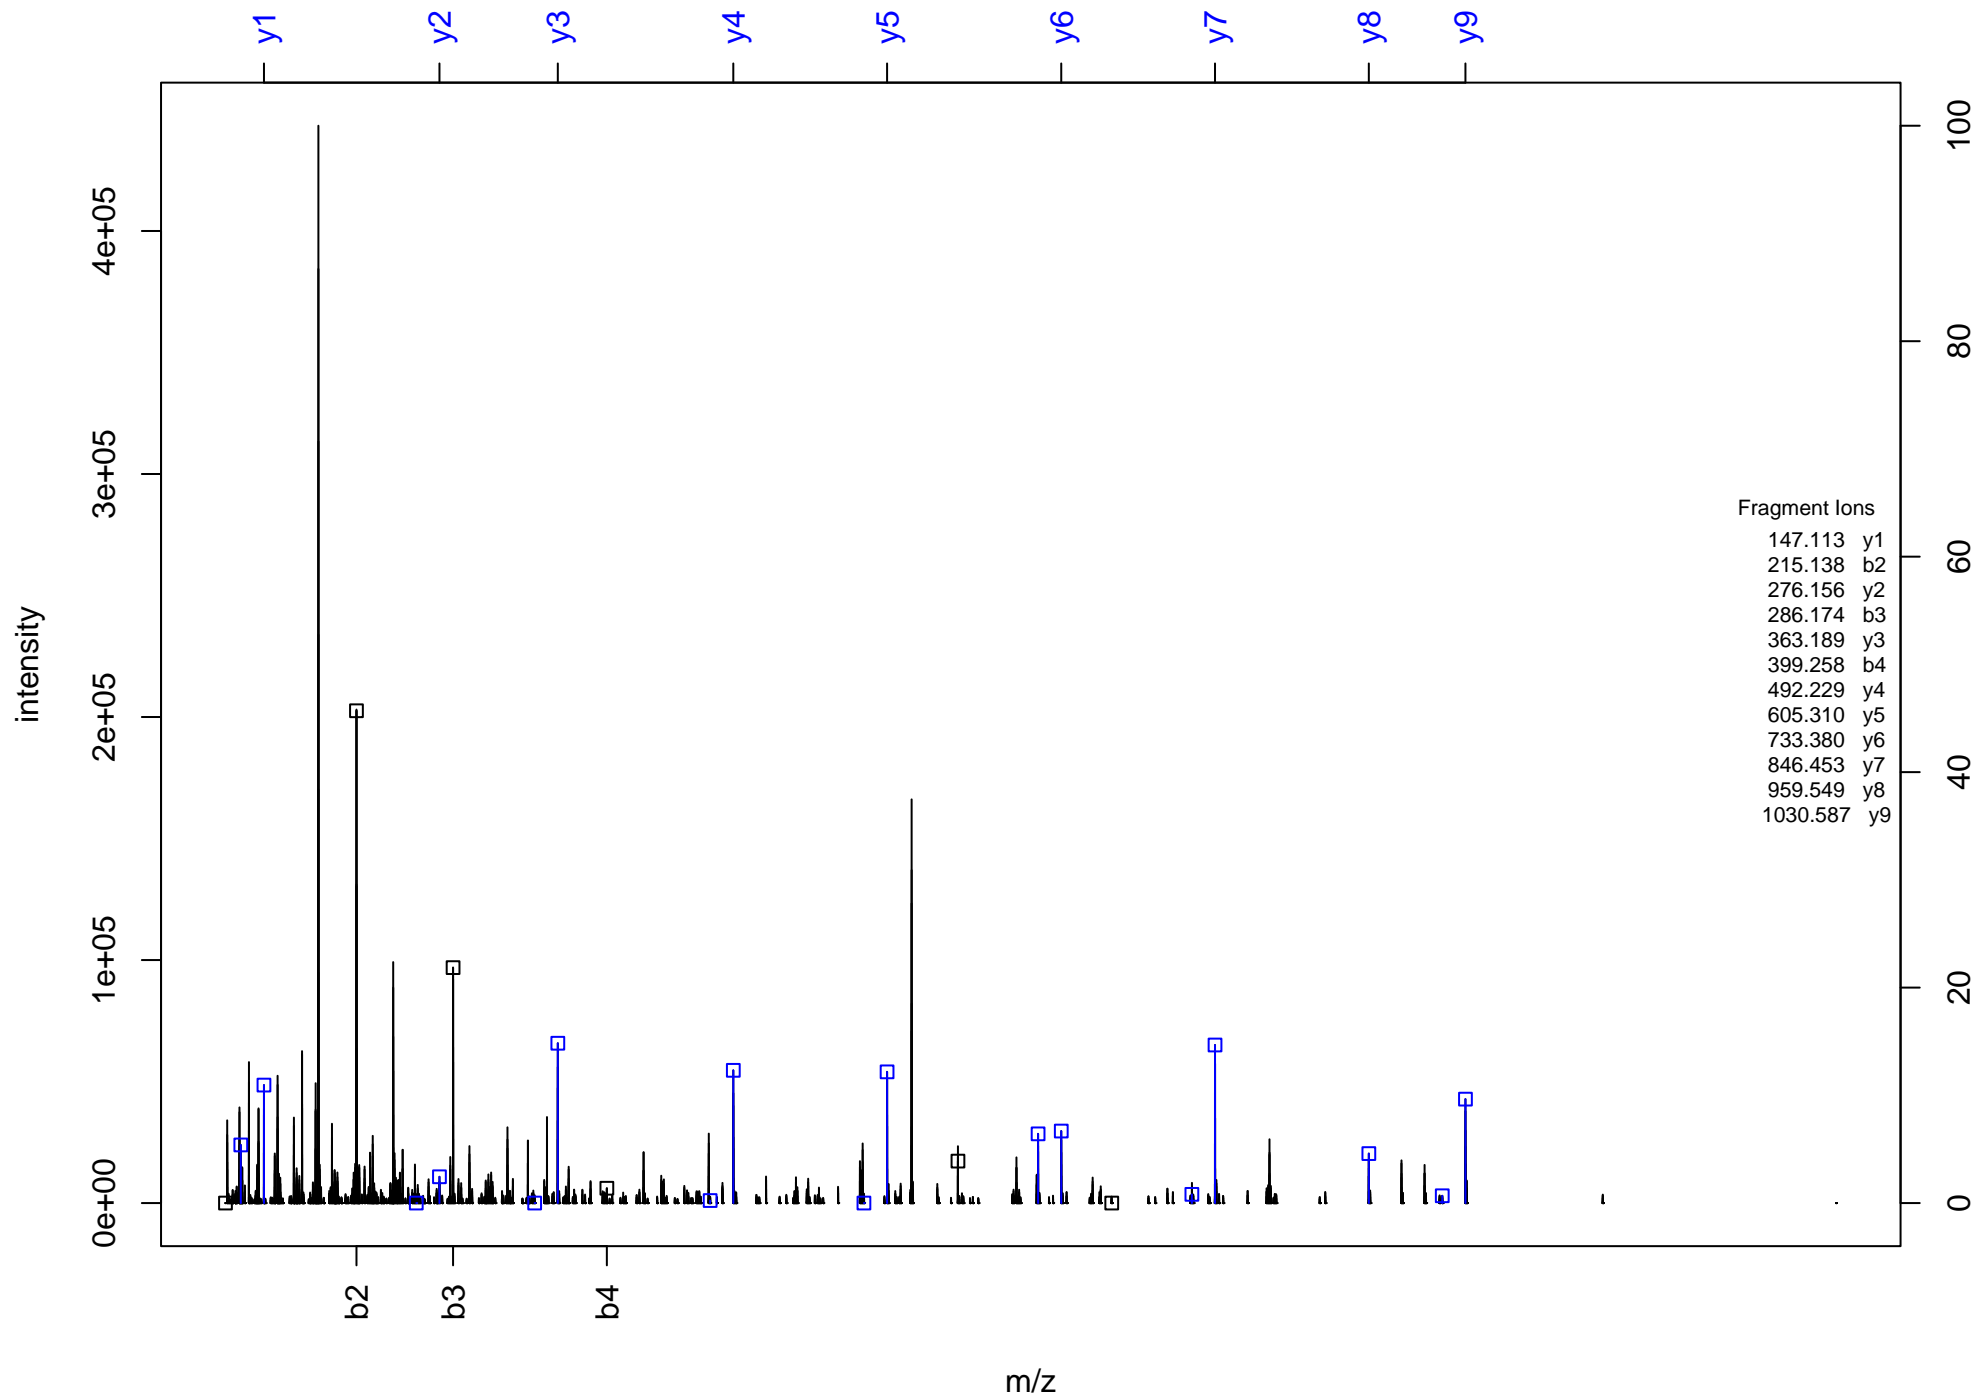

# VTTVVATVGQGPER

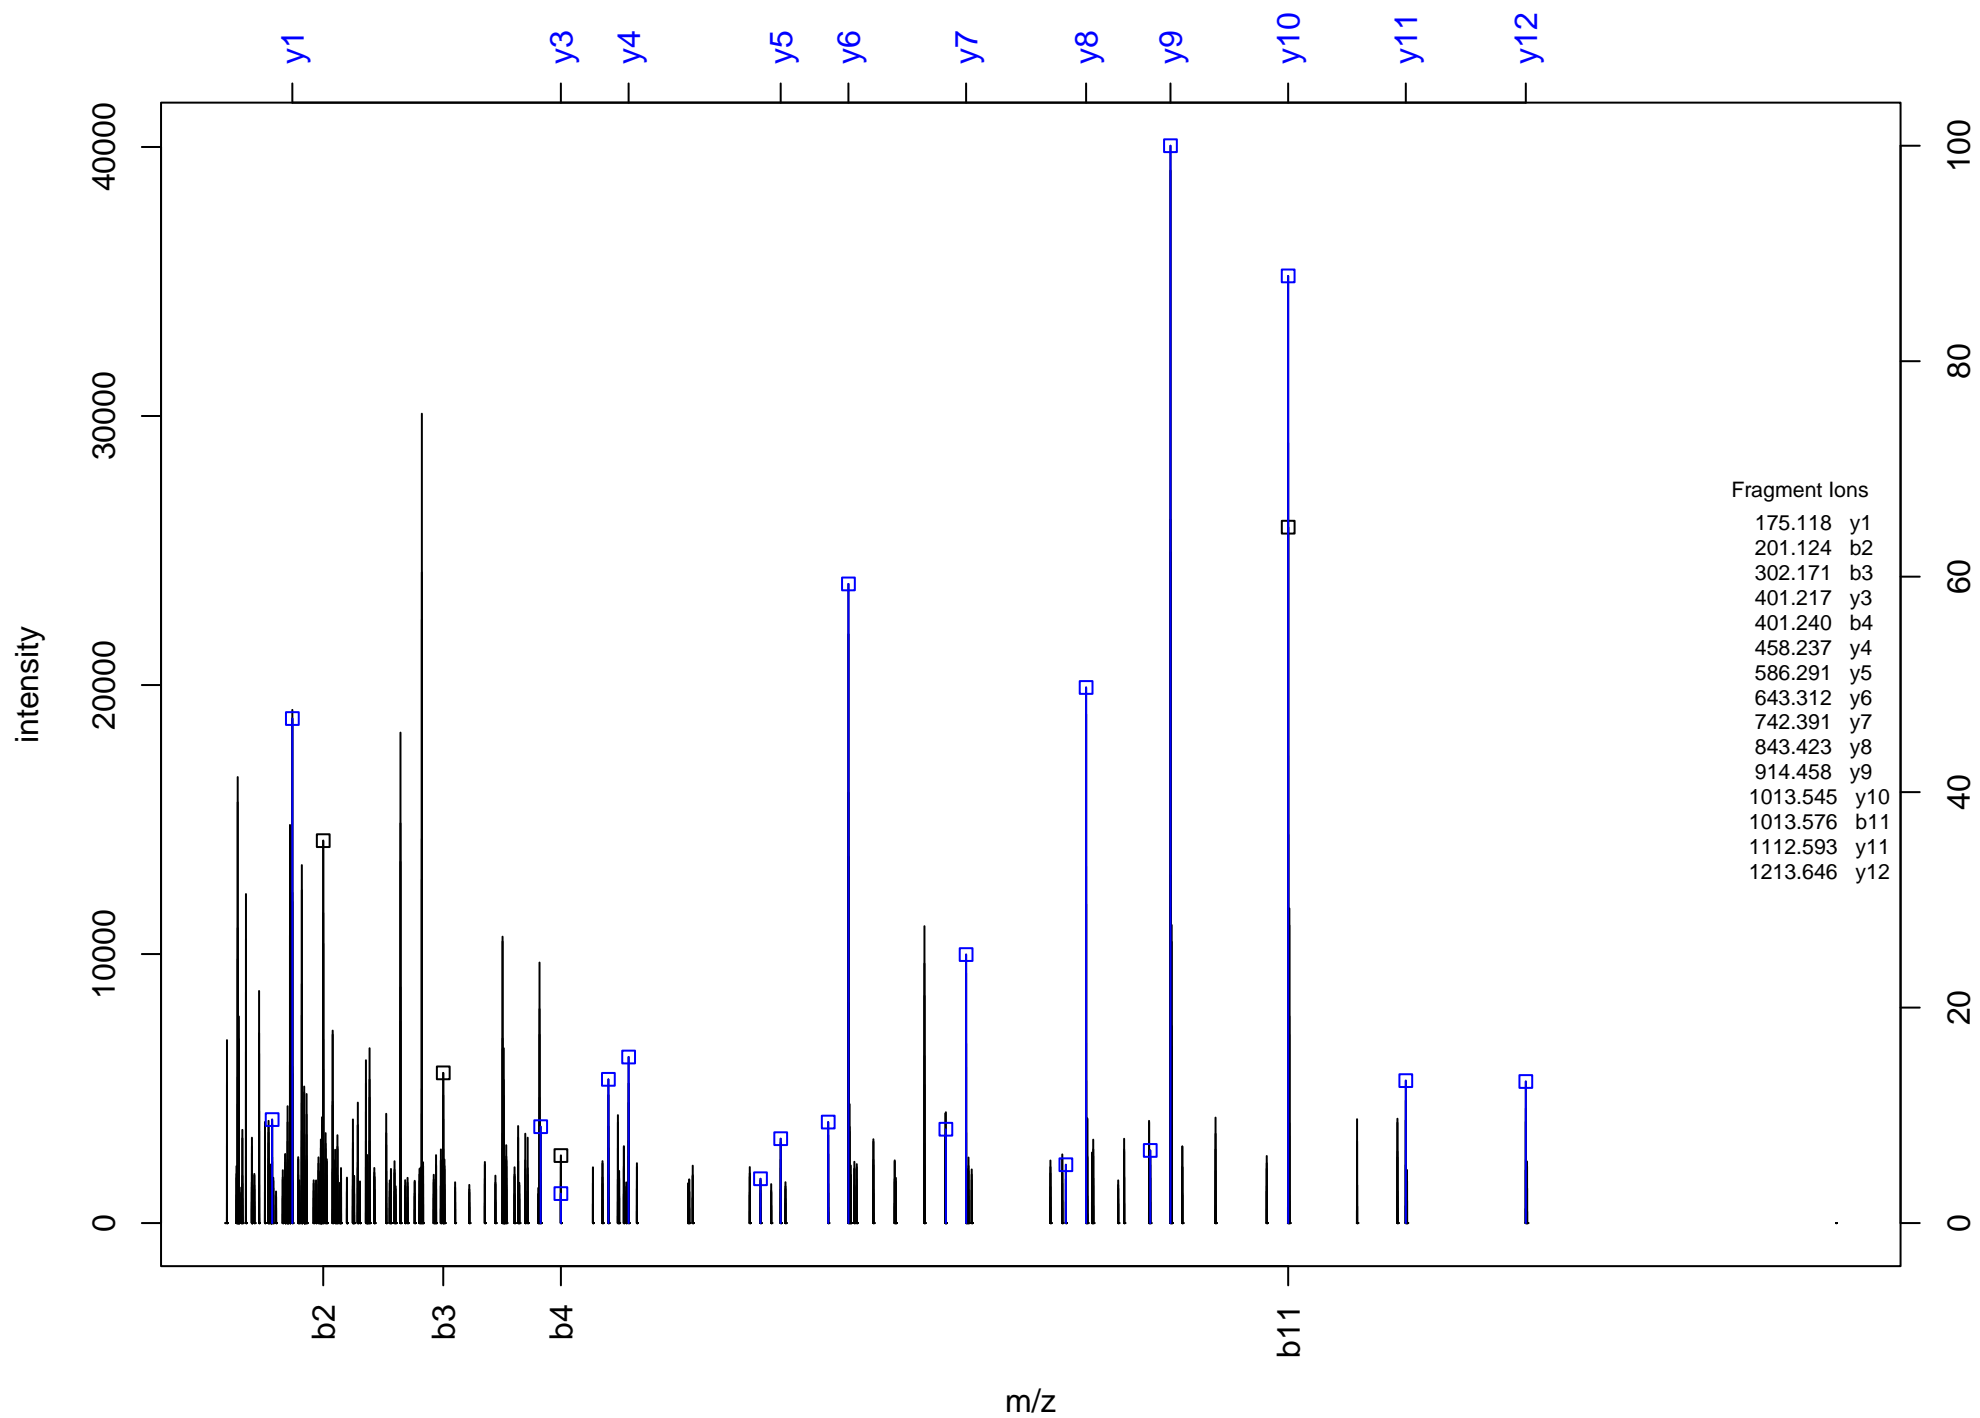

# NVLITDFFGSVR

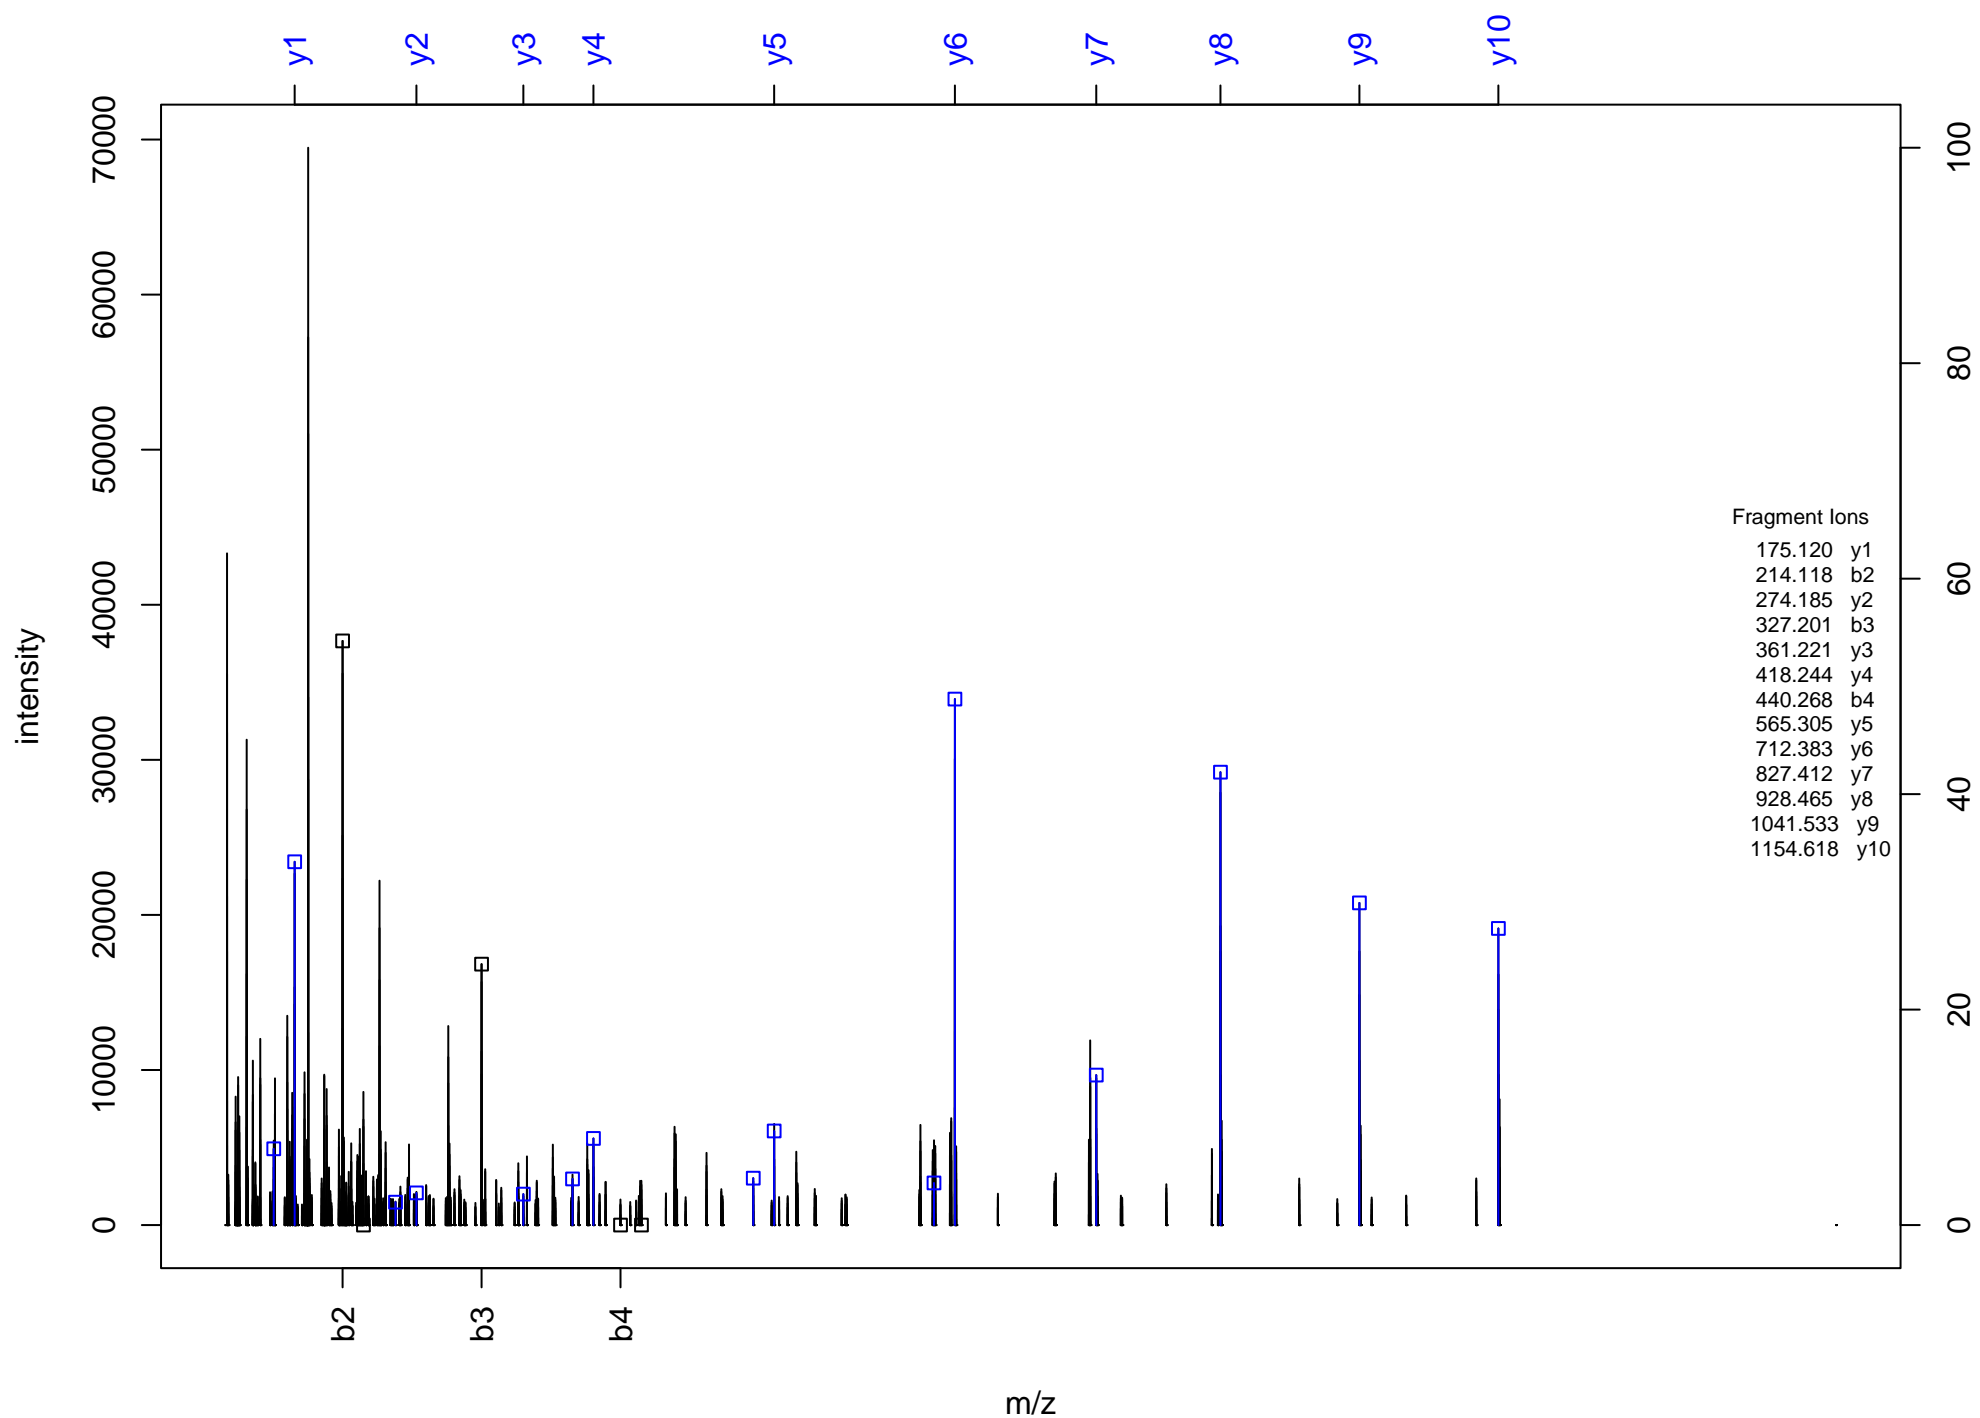

# ENQEFVNFR

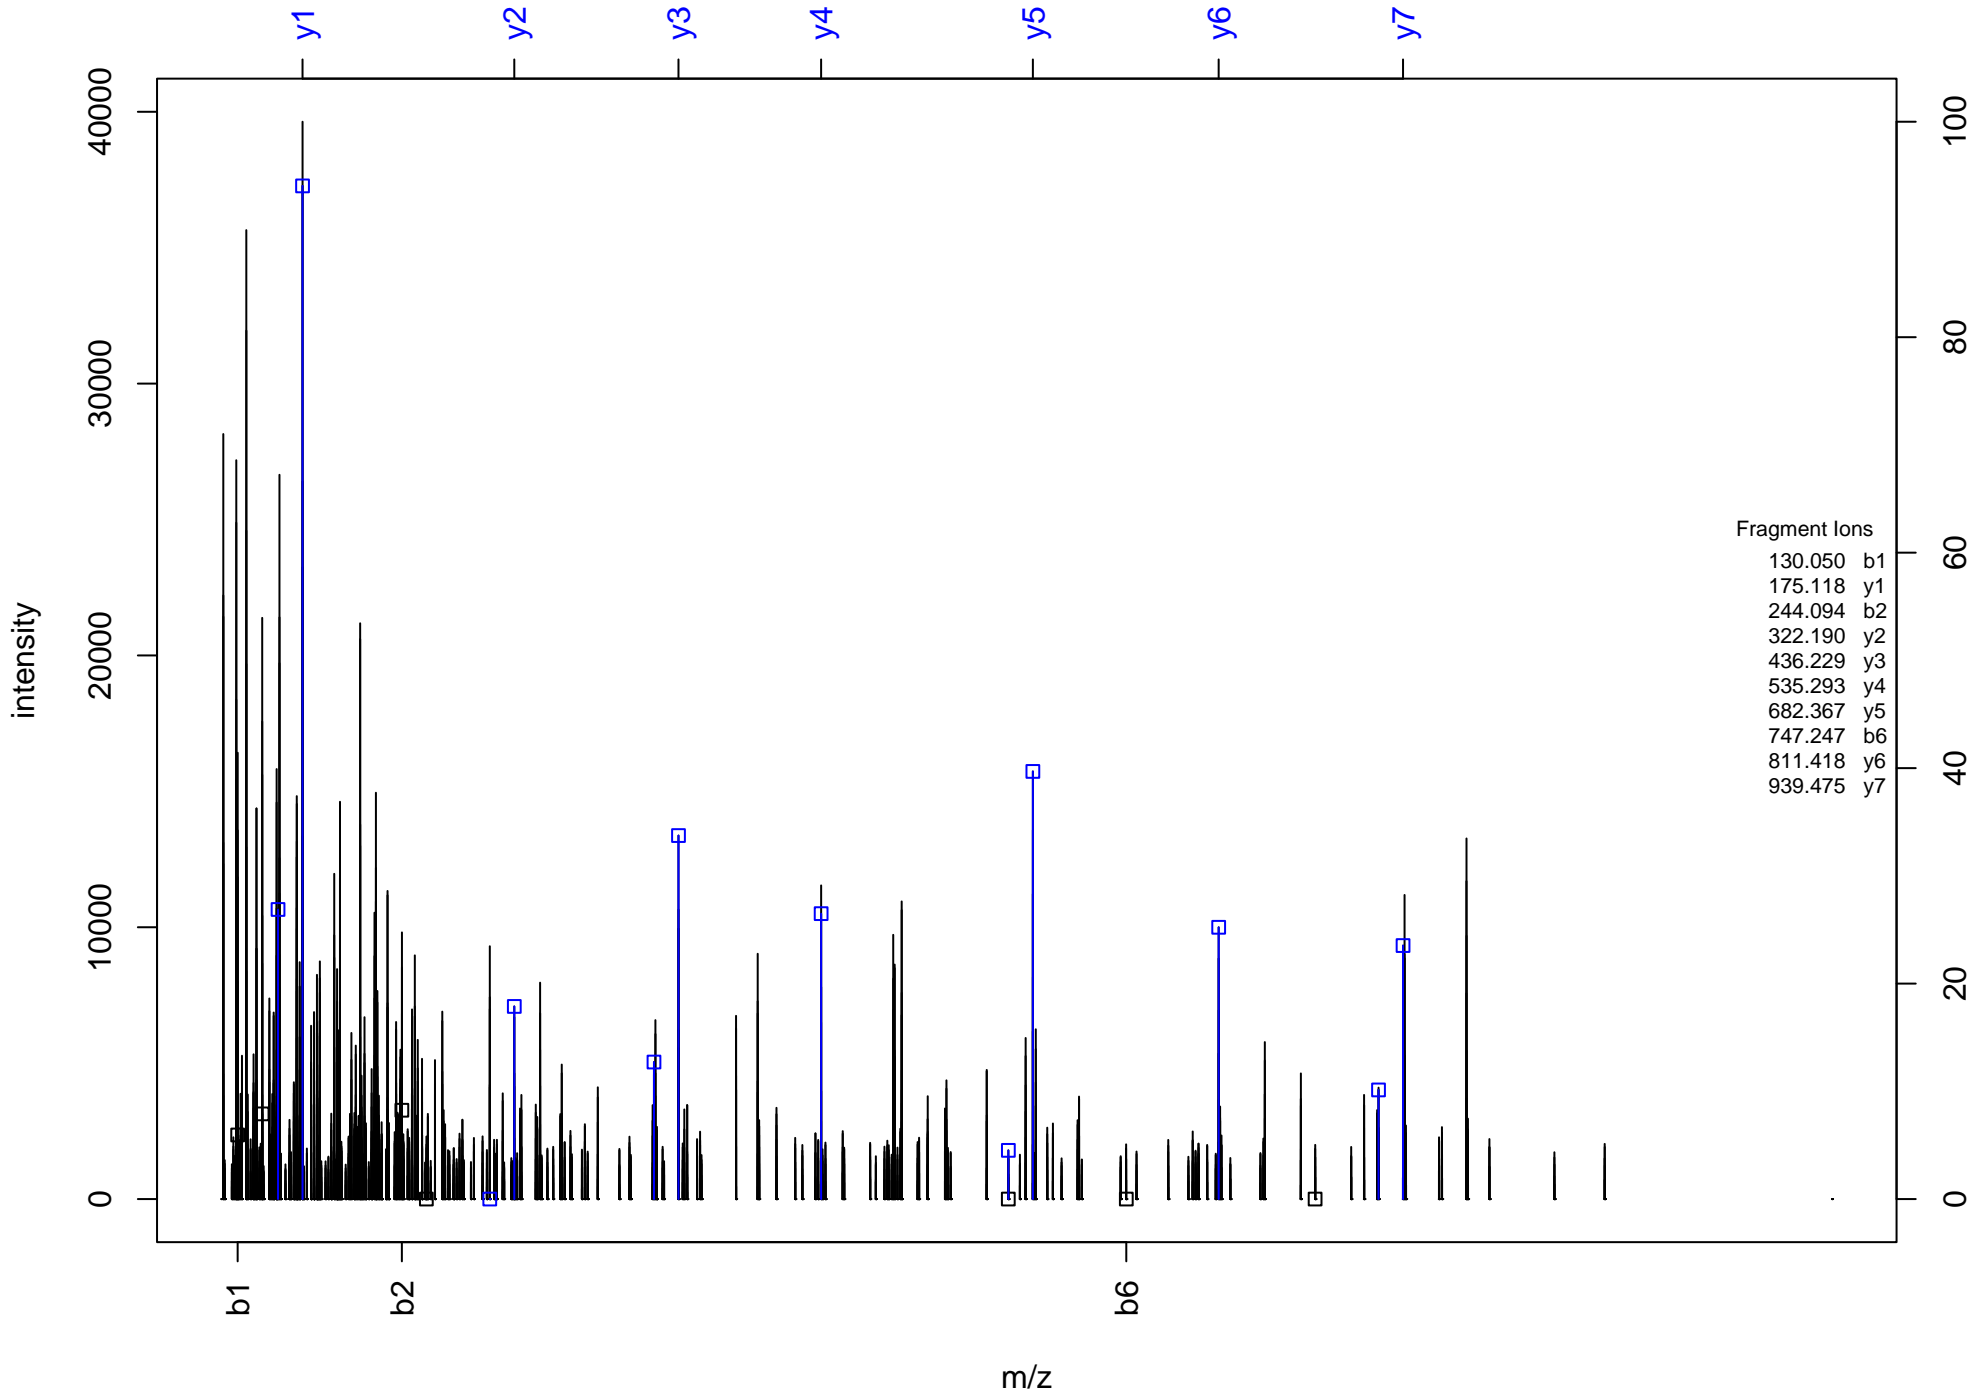

# SQTEEDCTEELFDLHAR

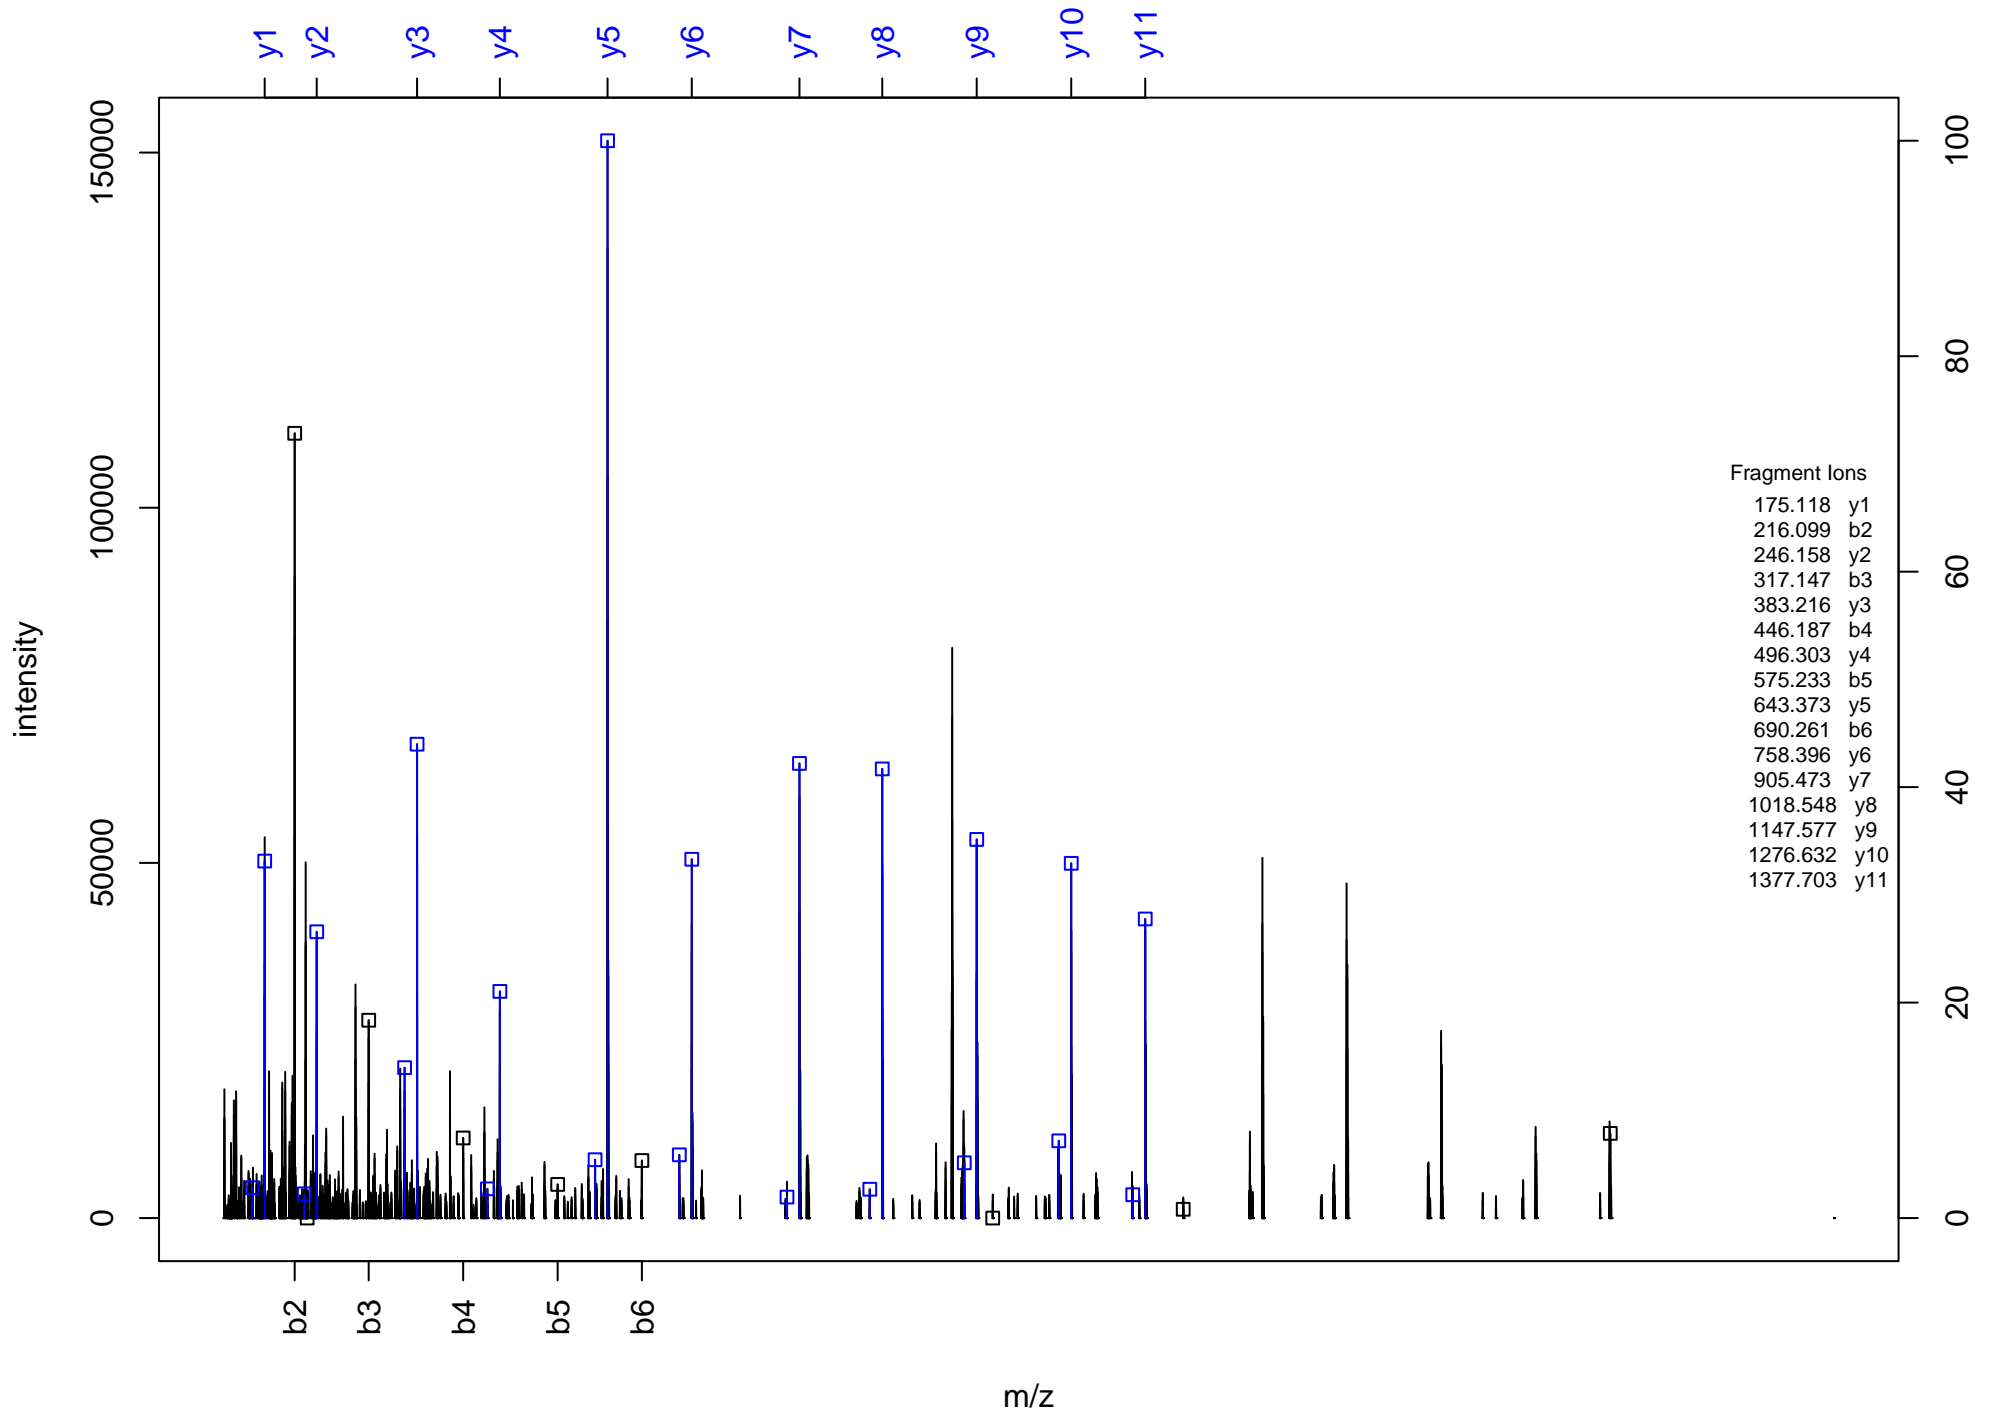

# DVDVSVYDFEEEEQQEGLLSEVNAEK

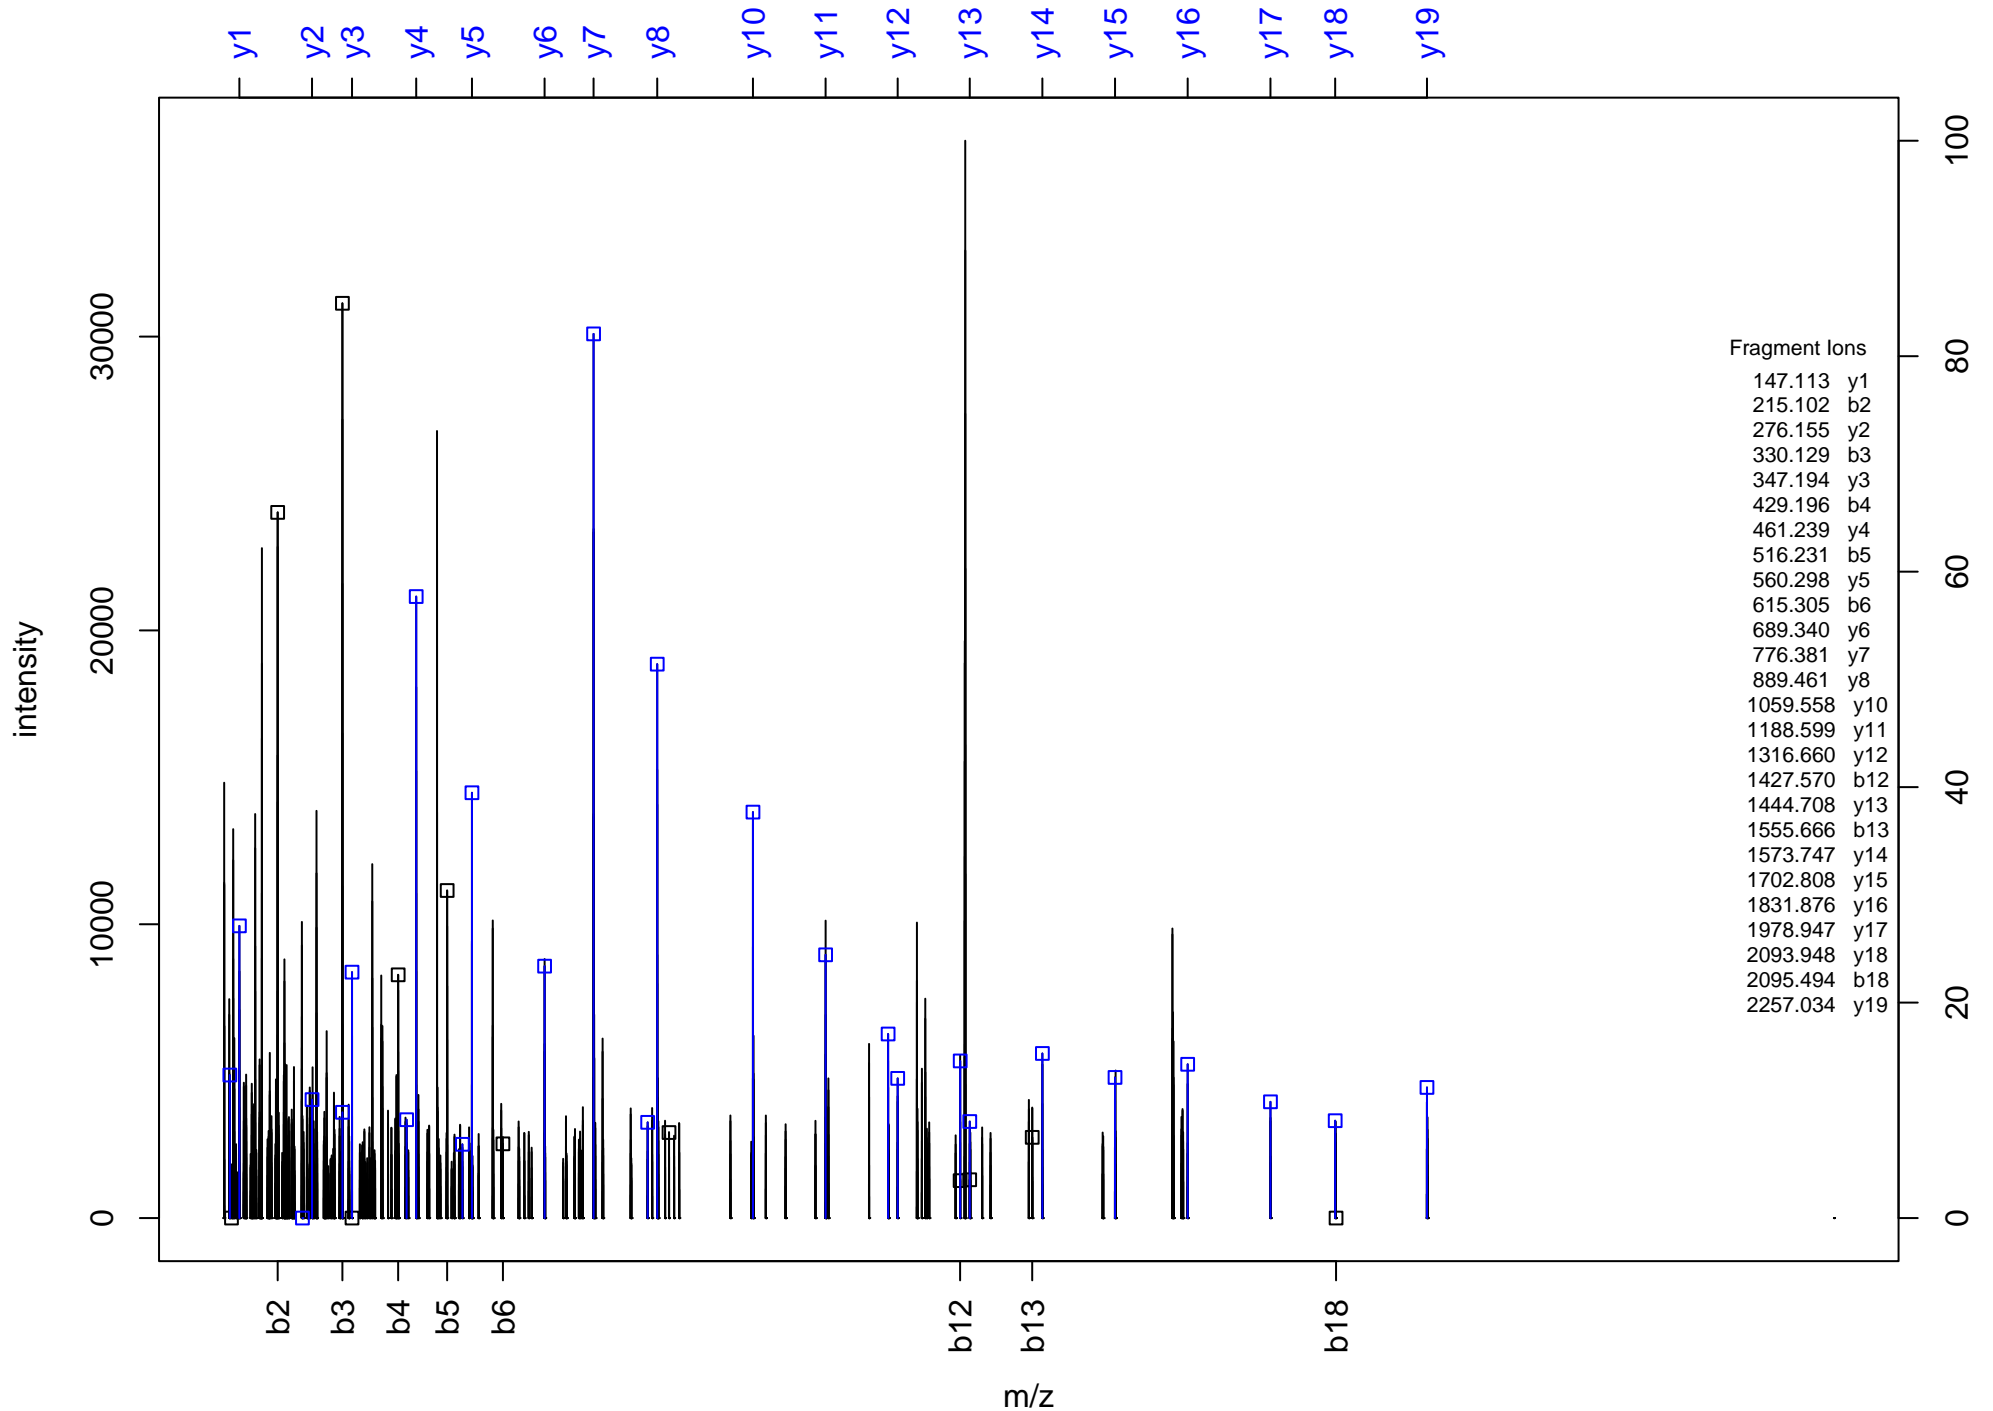

# EVWLLETPQADDFWCEGEPYPGPK

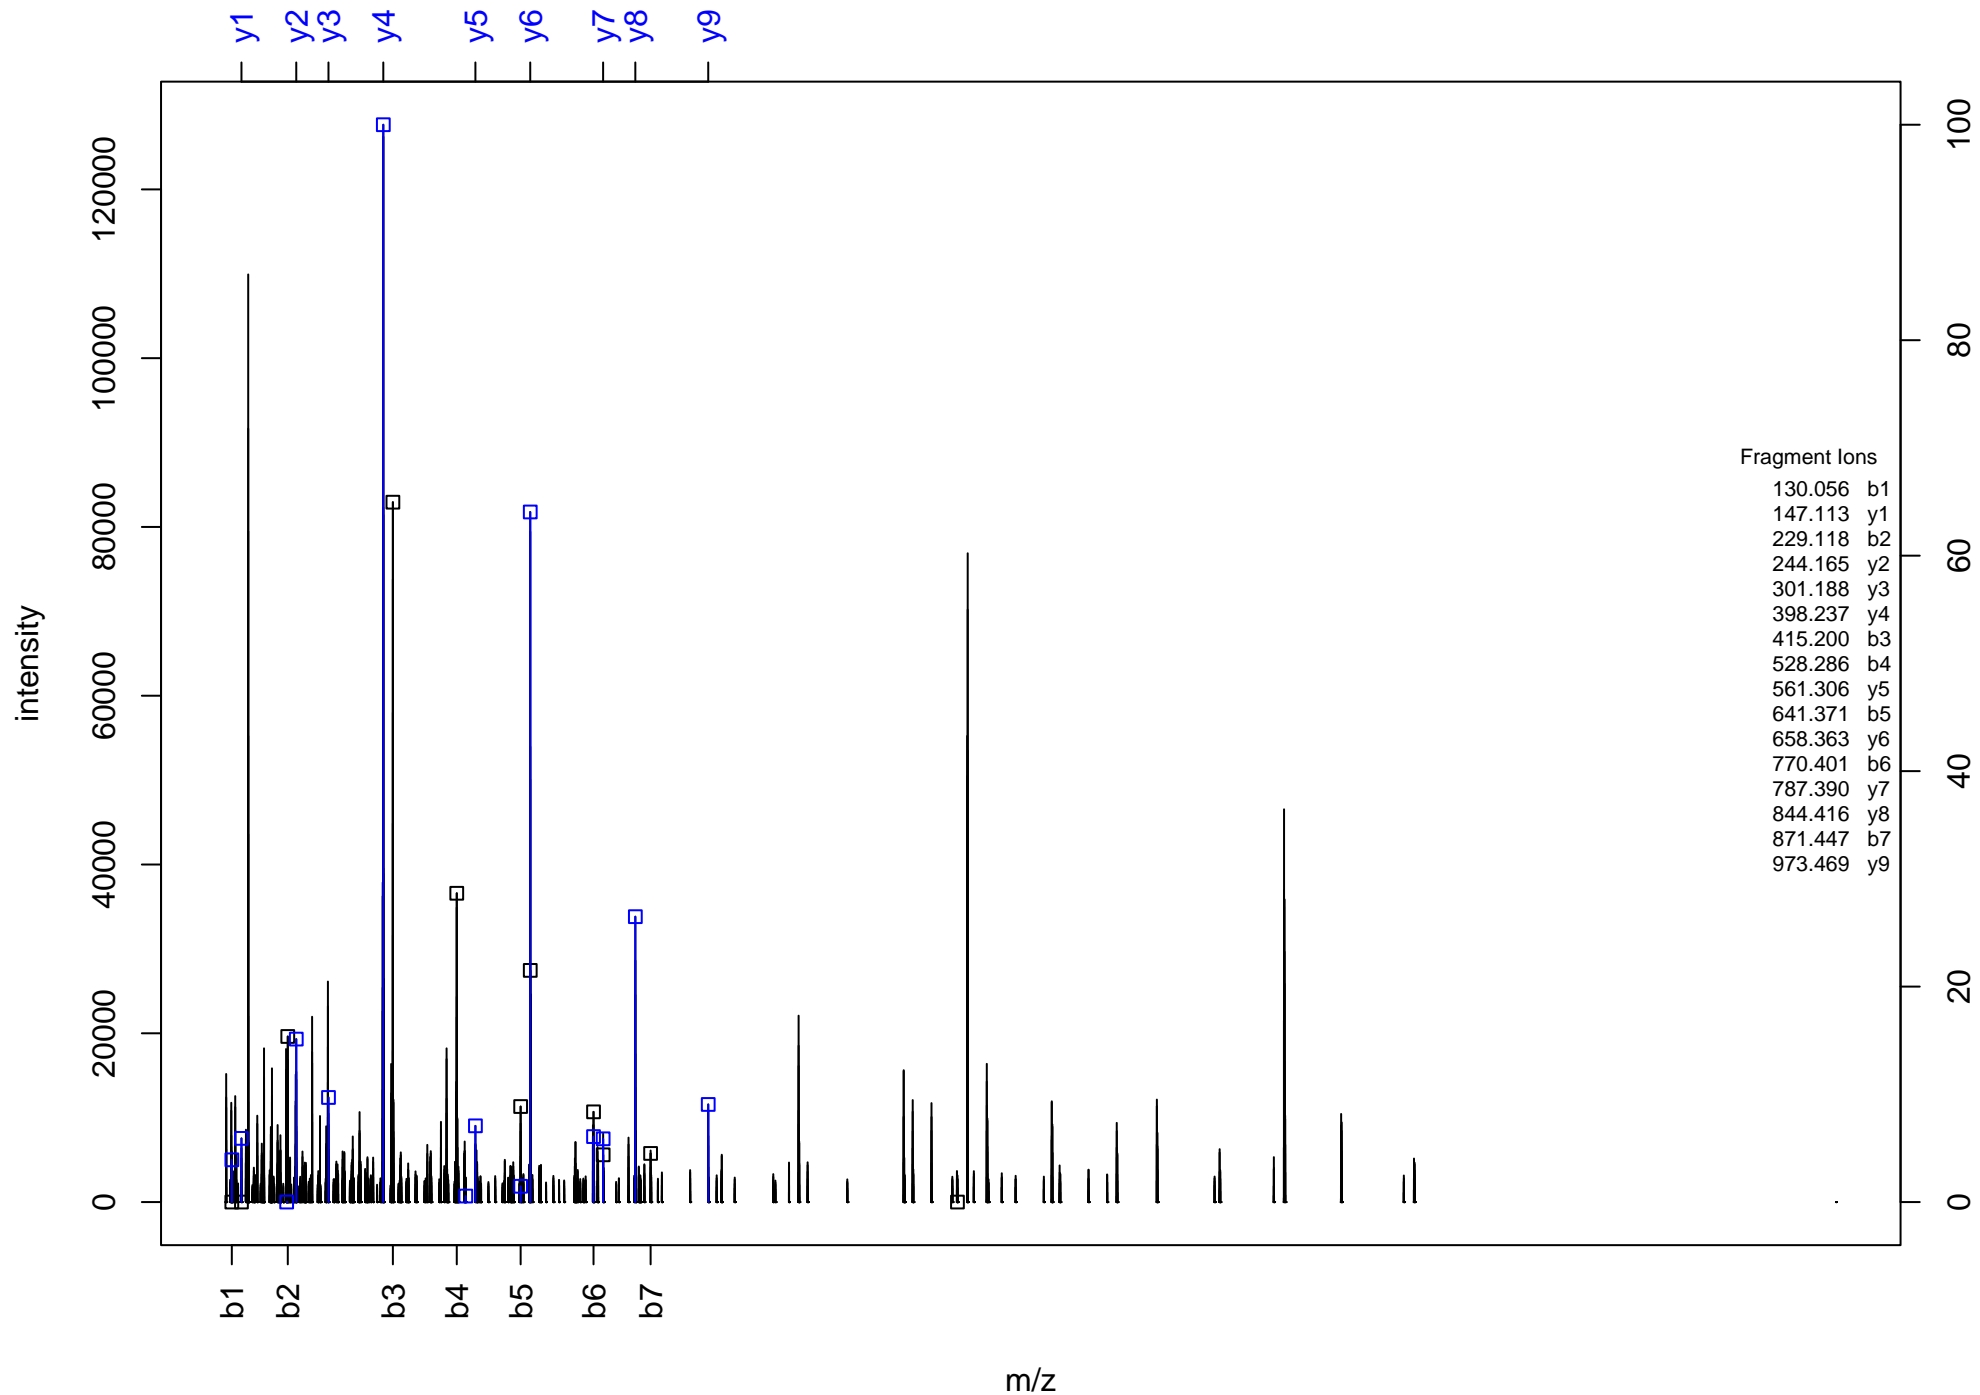

# IMVVGSTINDVLAVNTPK

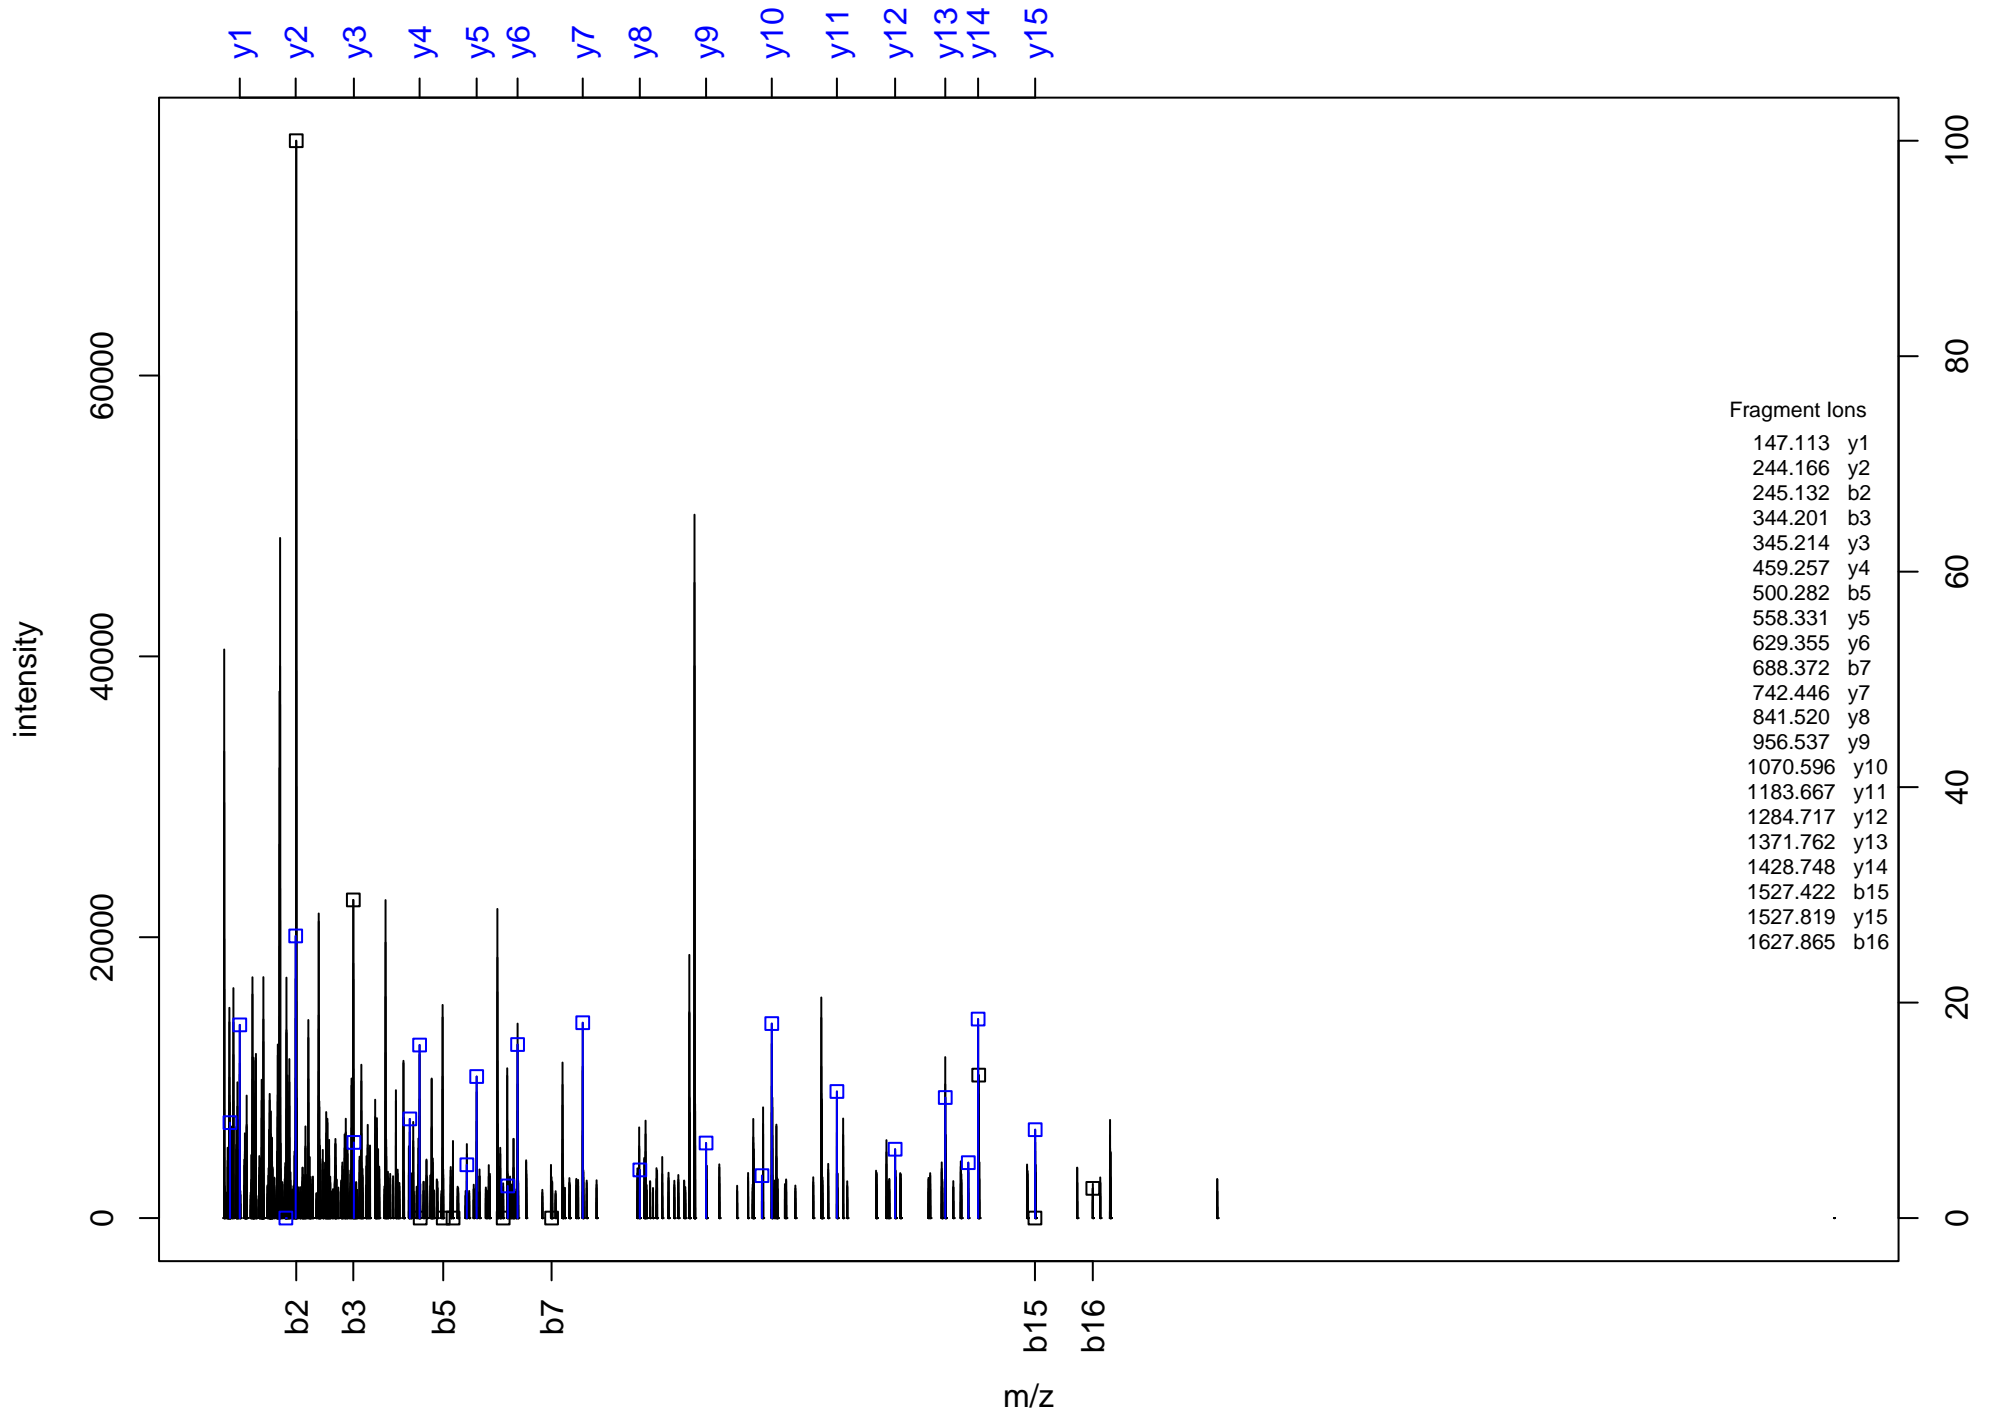



# LCDFGLAR

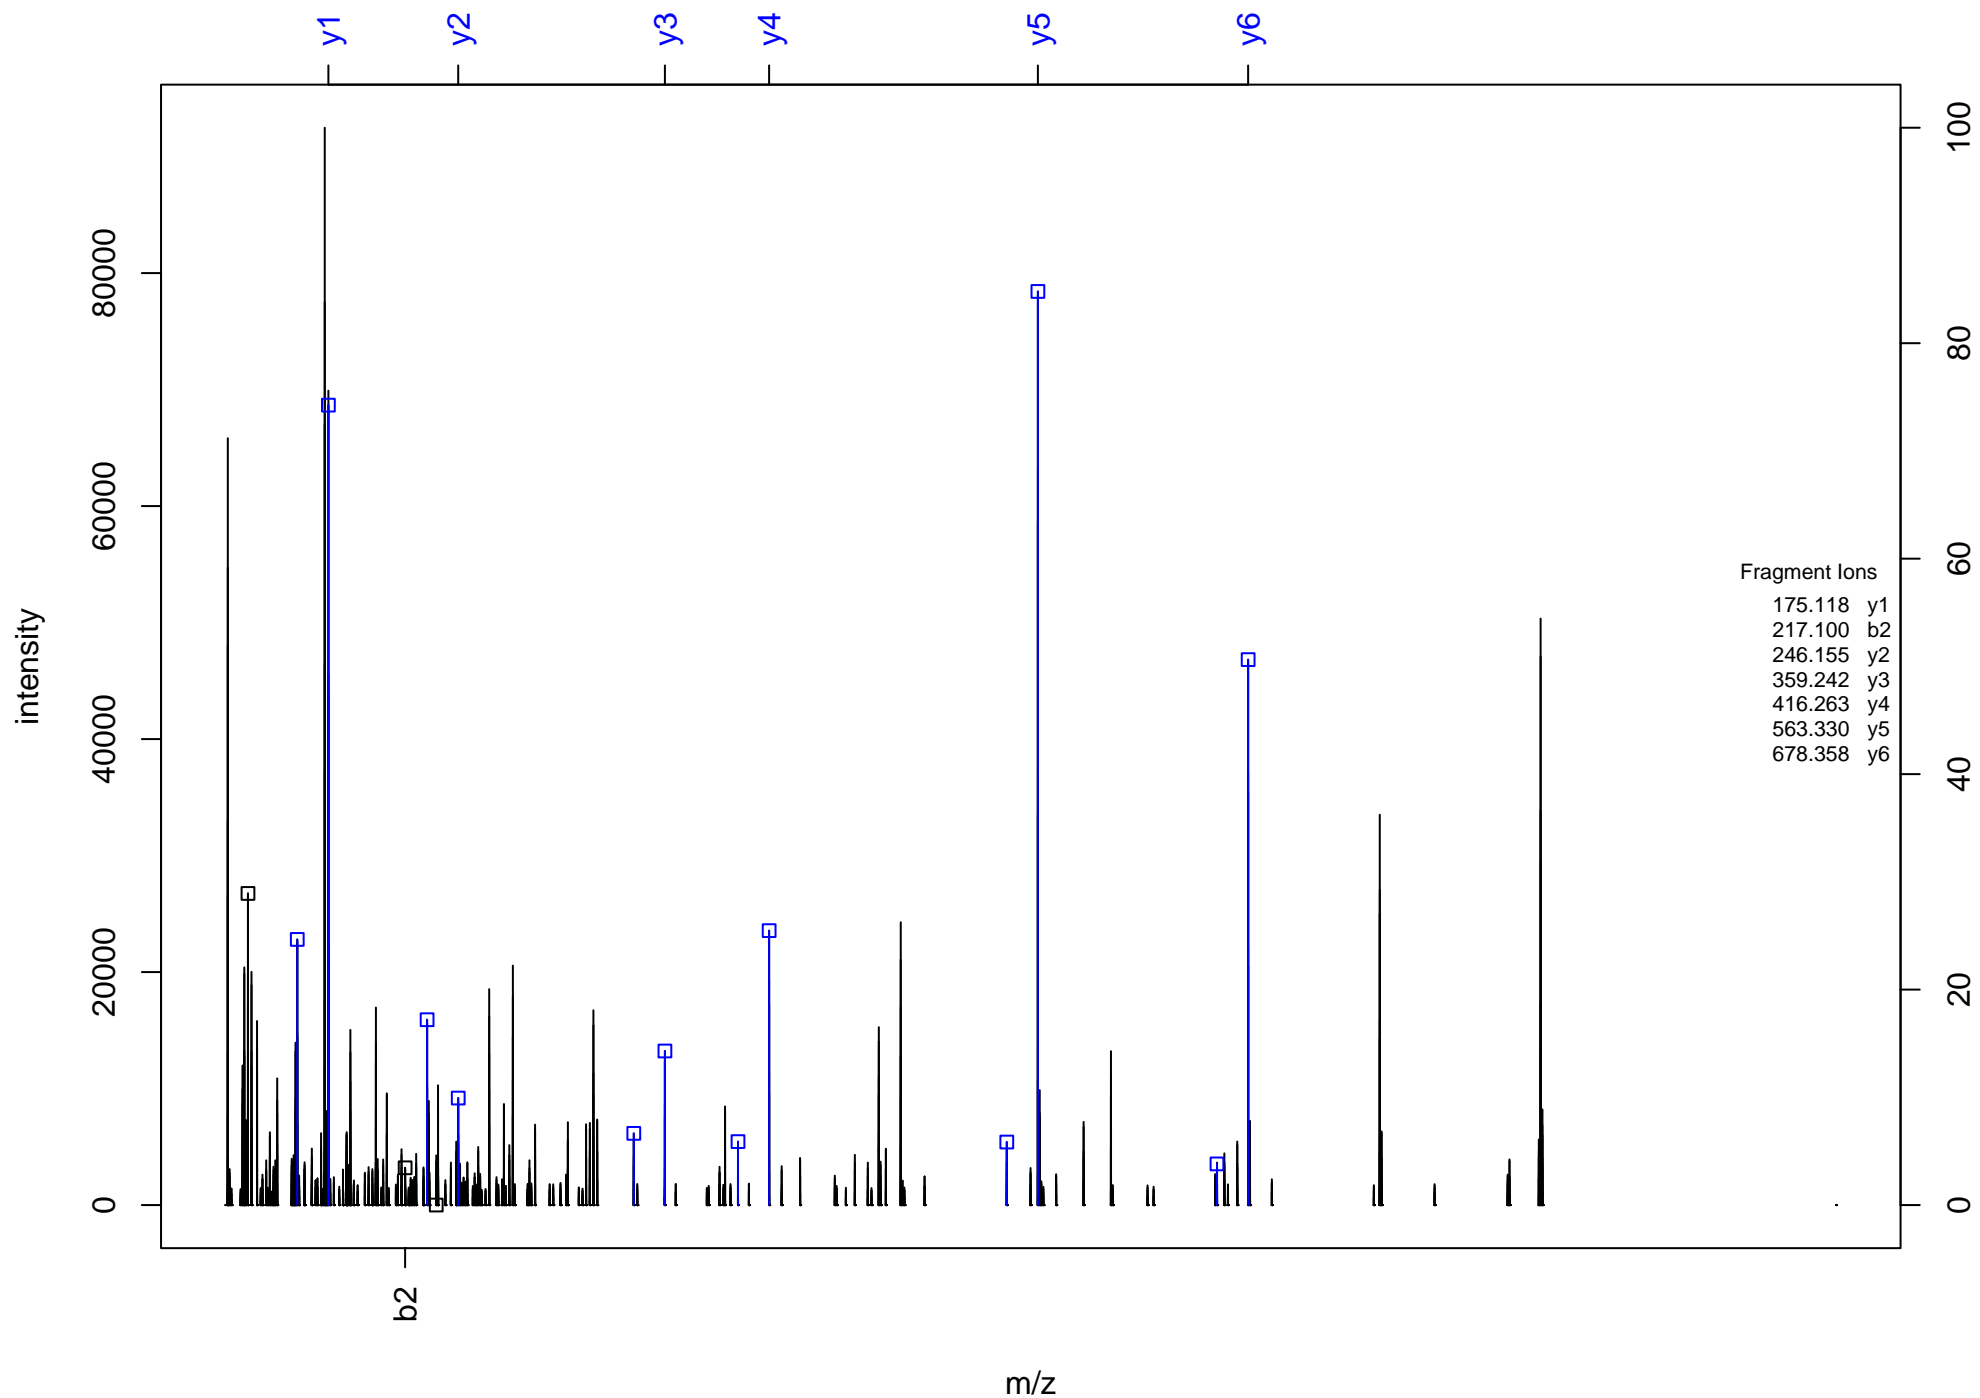

Fragment Ions  
175.118 y1  
217.100 b2  
246.155 y2  
359.242 y3  
416.263 y4  
563.330 y5  
678.358 y6

# N<sup>^</sup>LKTS<sup>^</sup>SDSDIN<sup>^</sup>VK<sup>^</sup>PEN<sup>^</sup>N<sup>^</sup>K

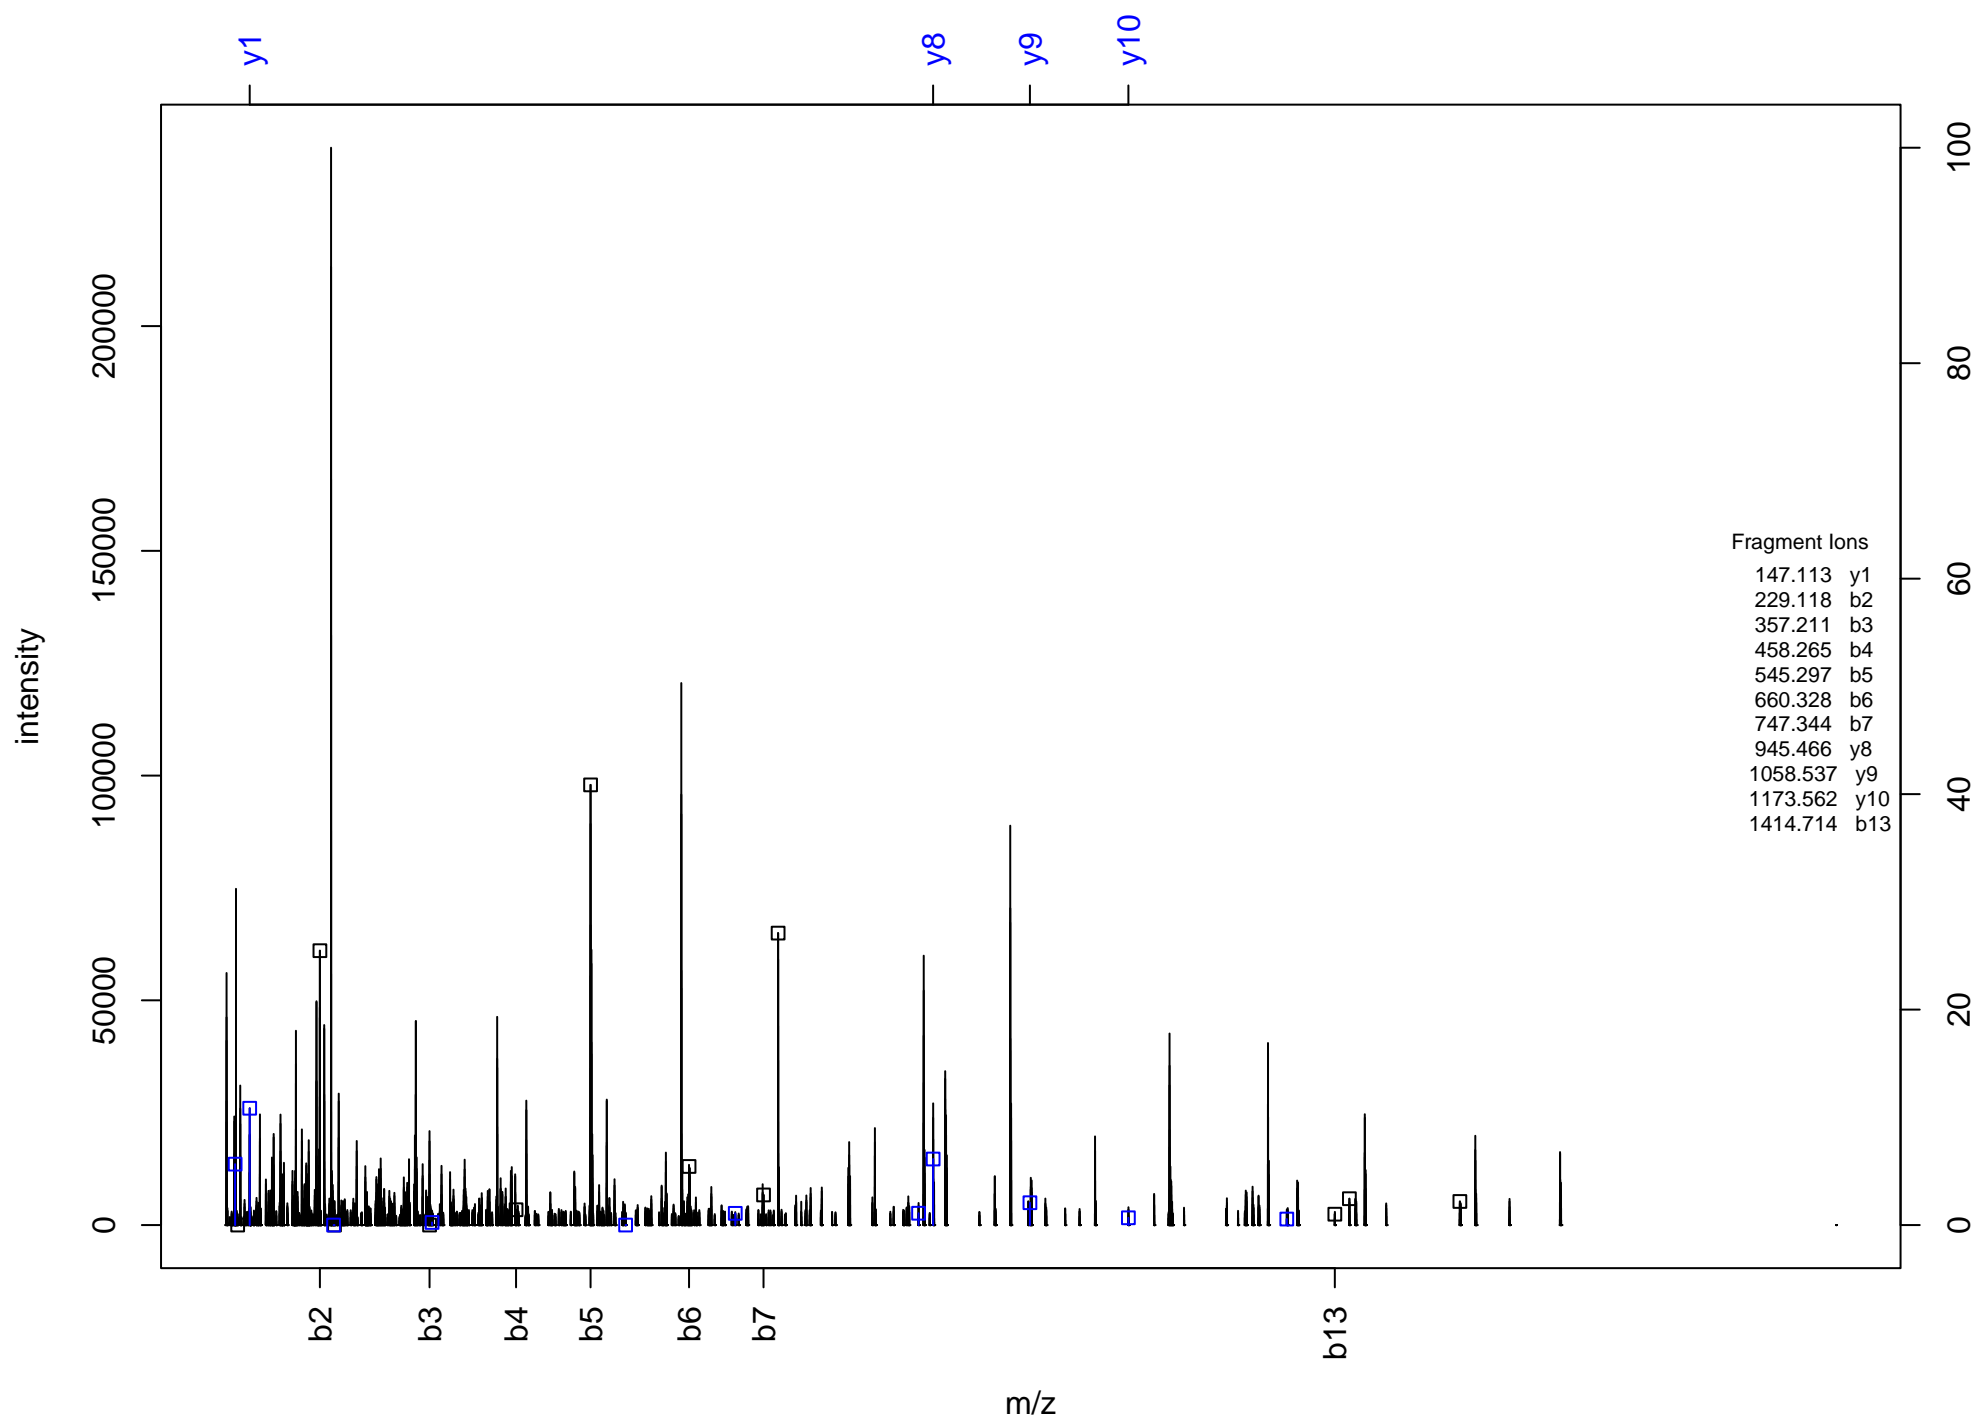

# FIDDVVSAVLR

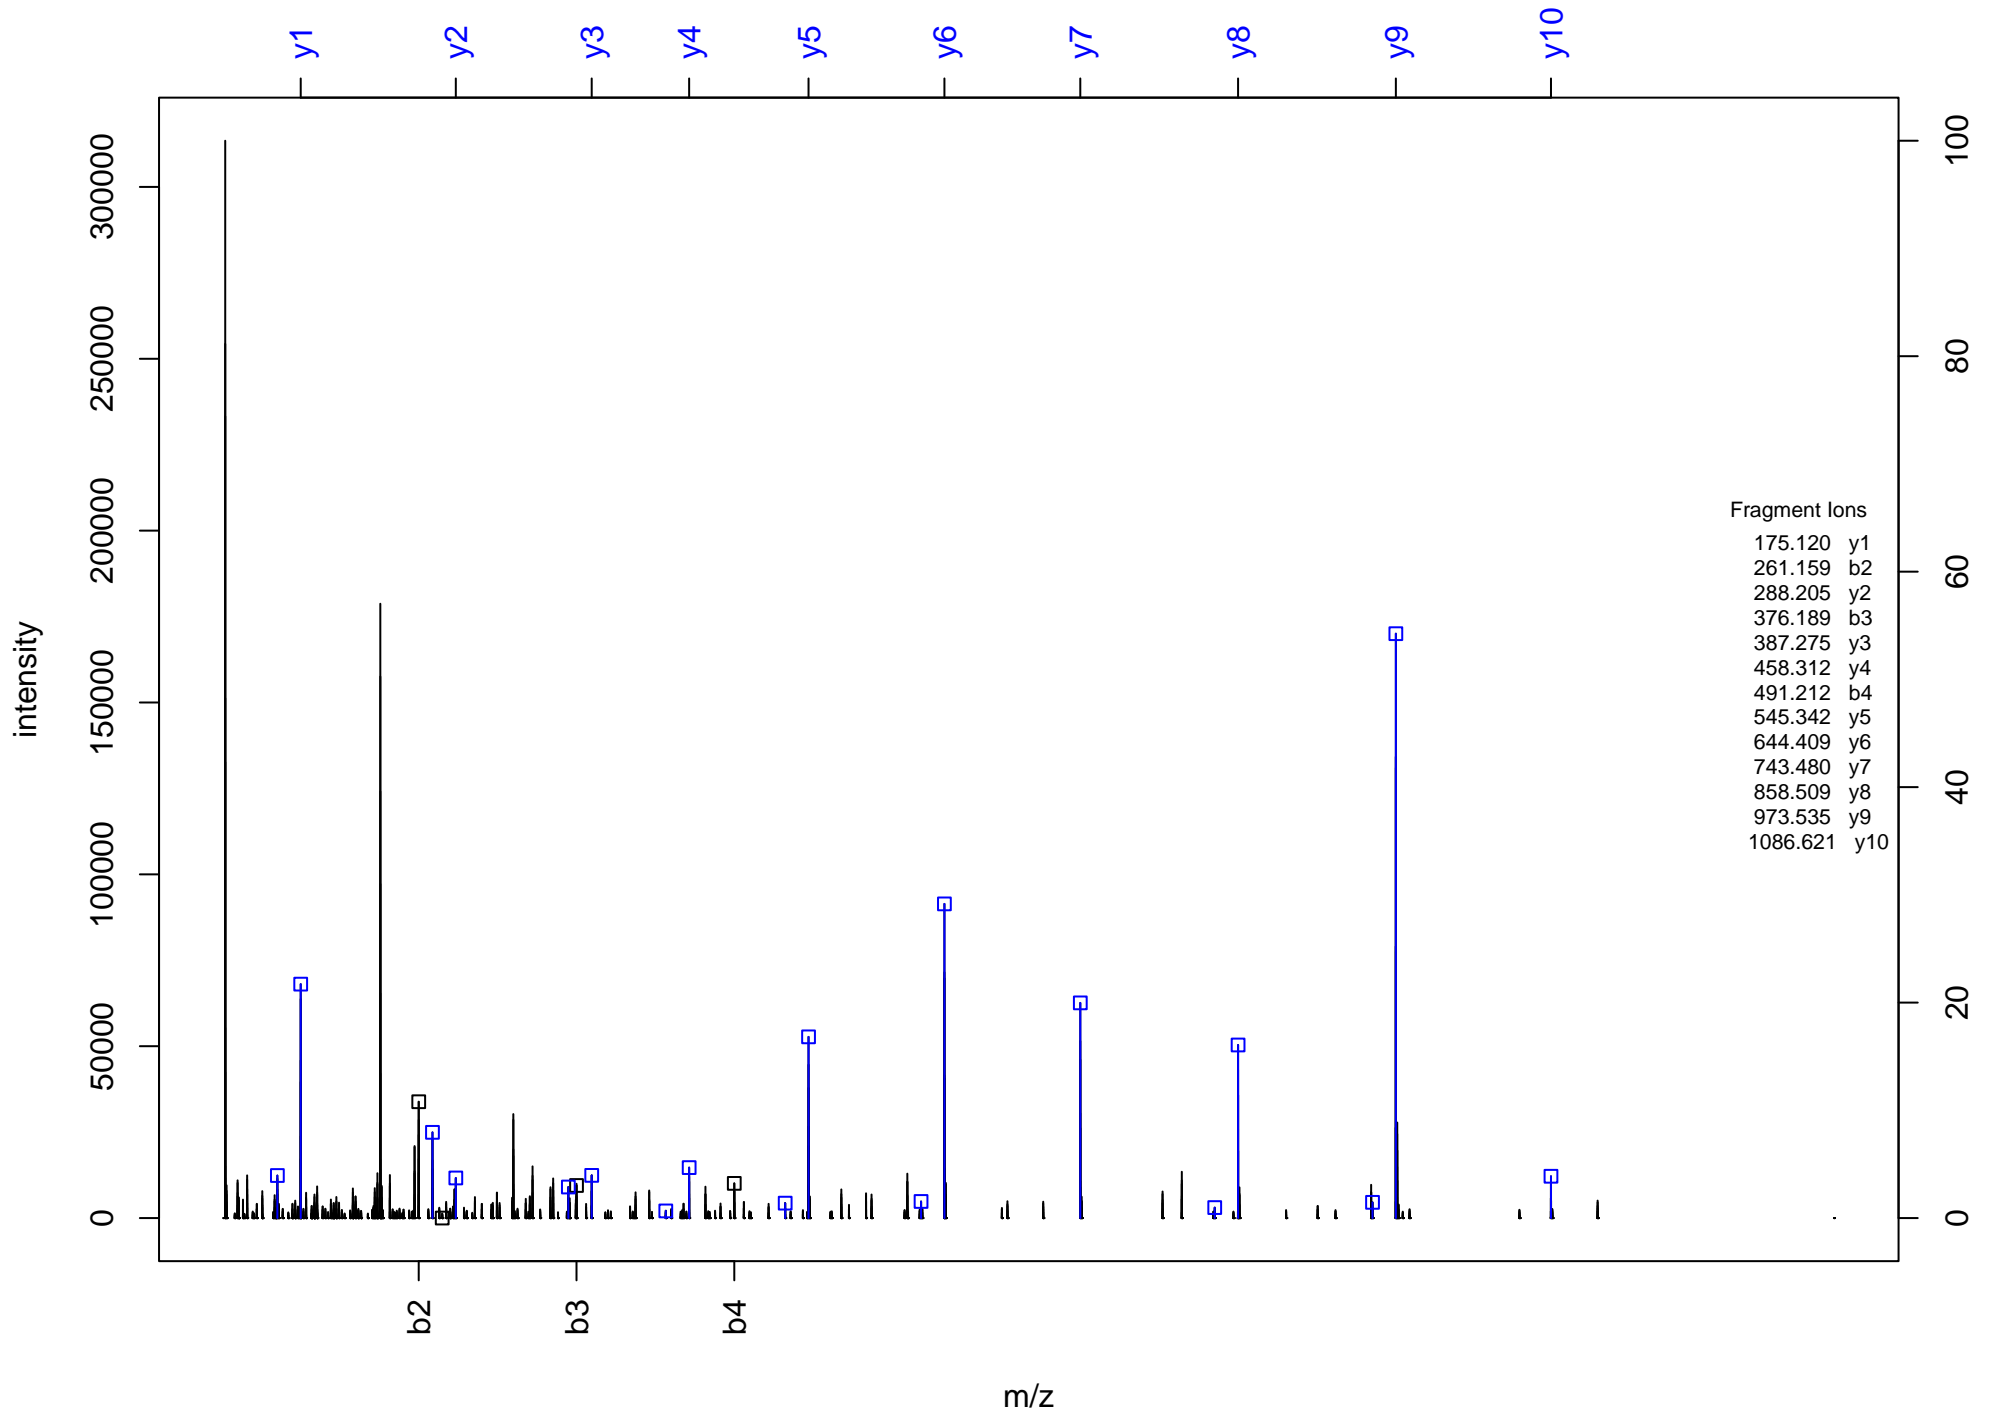

# LN<sup>Q</sup>AIQ<sup>Q</sup>QLK

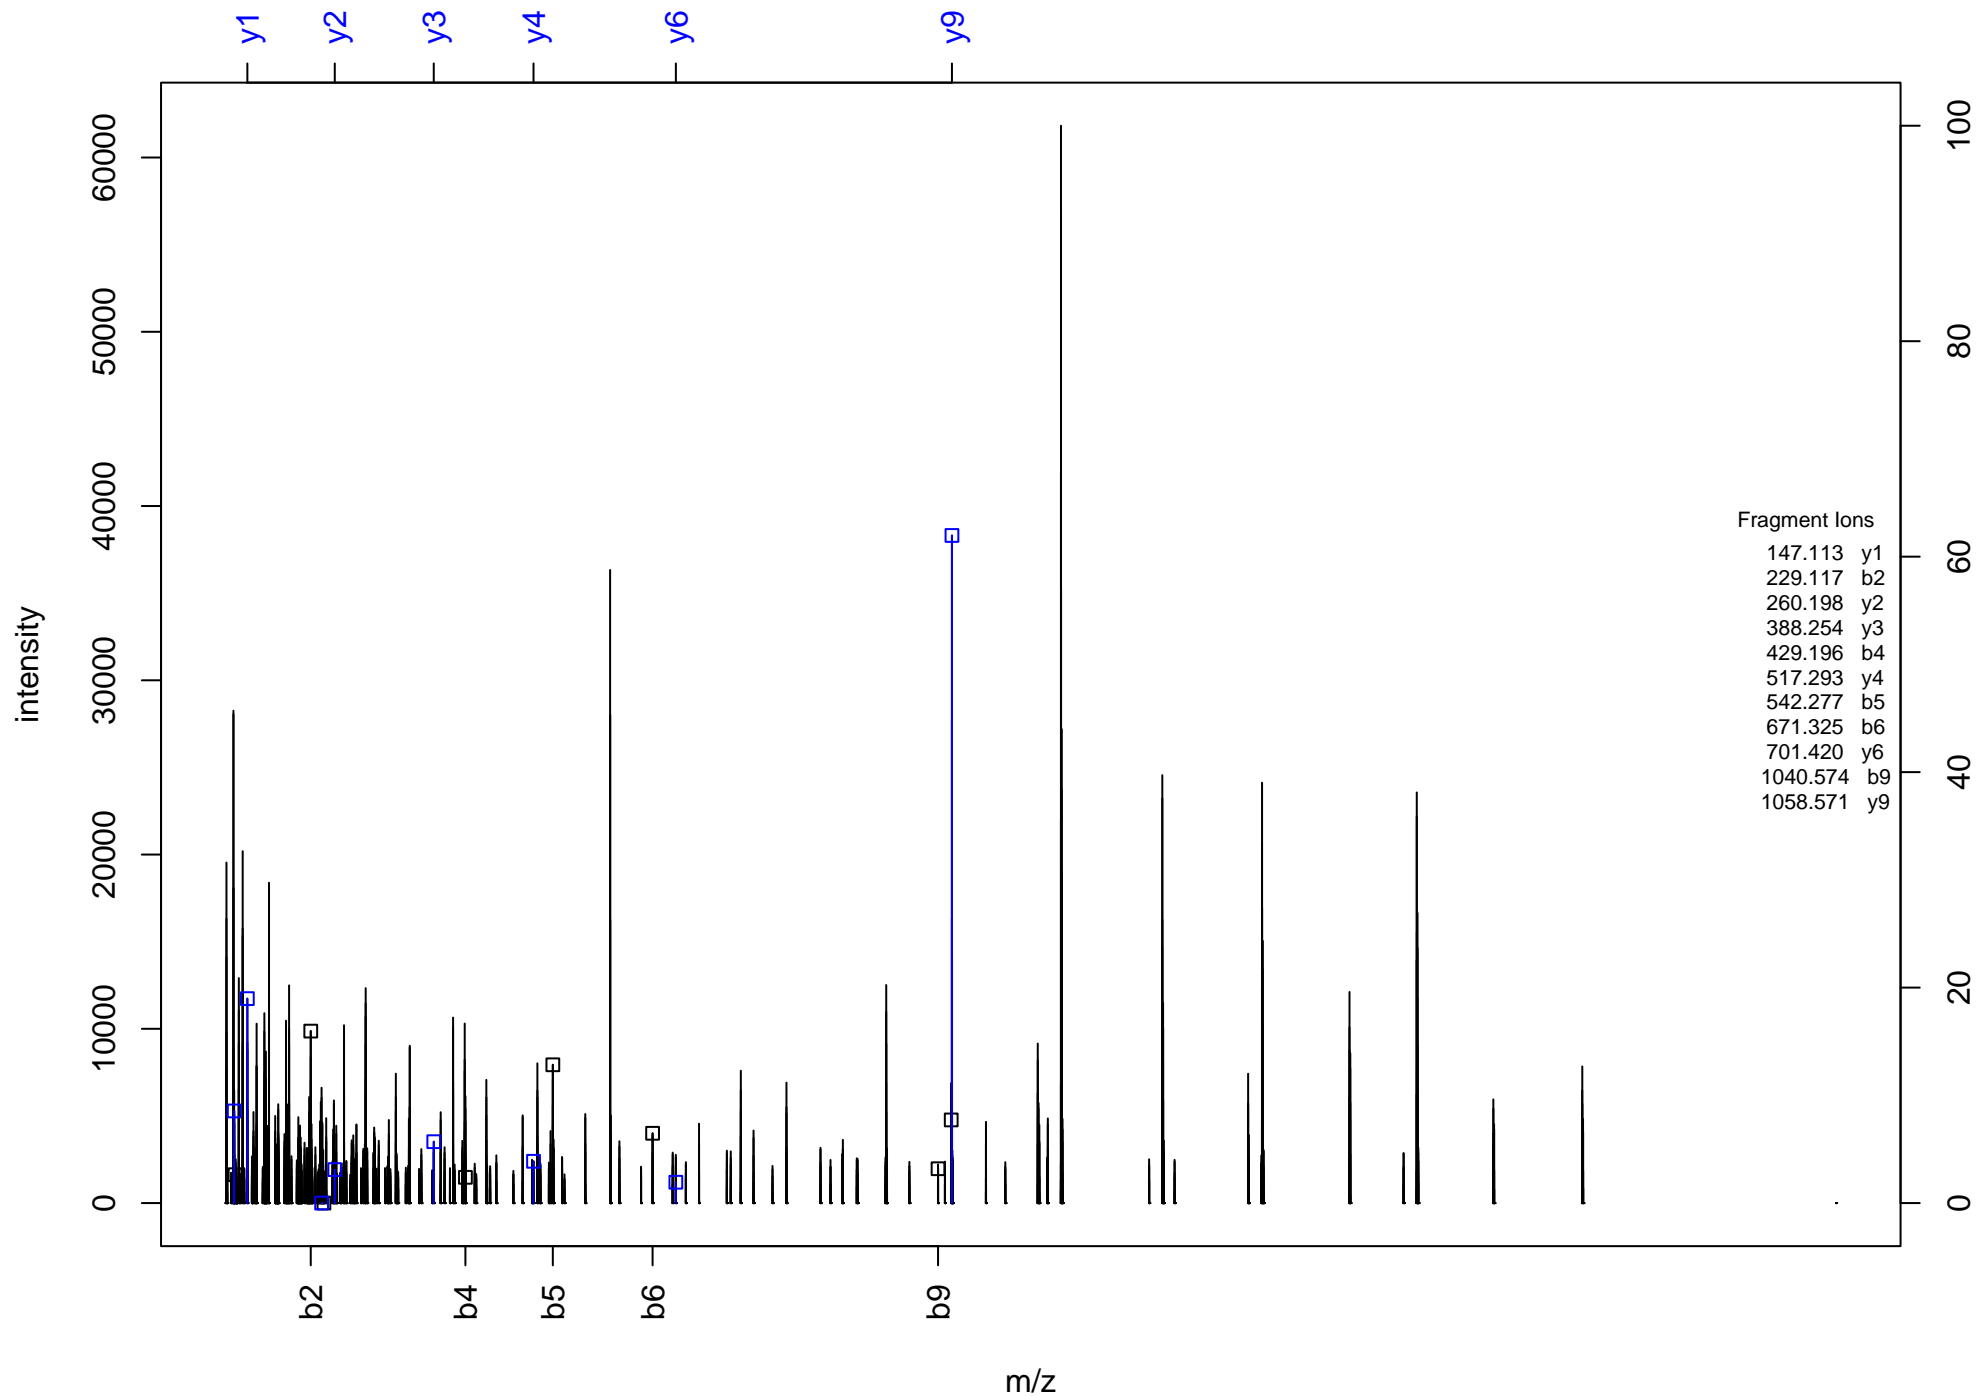

# GISSYSVDIM\*N^ILINDIFER

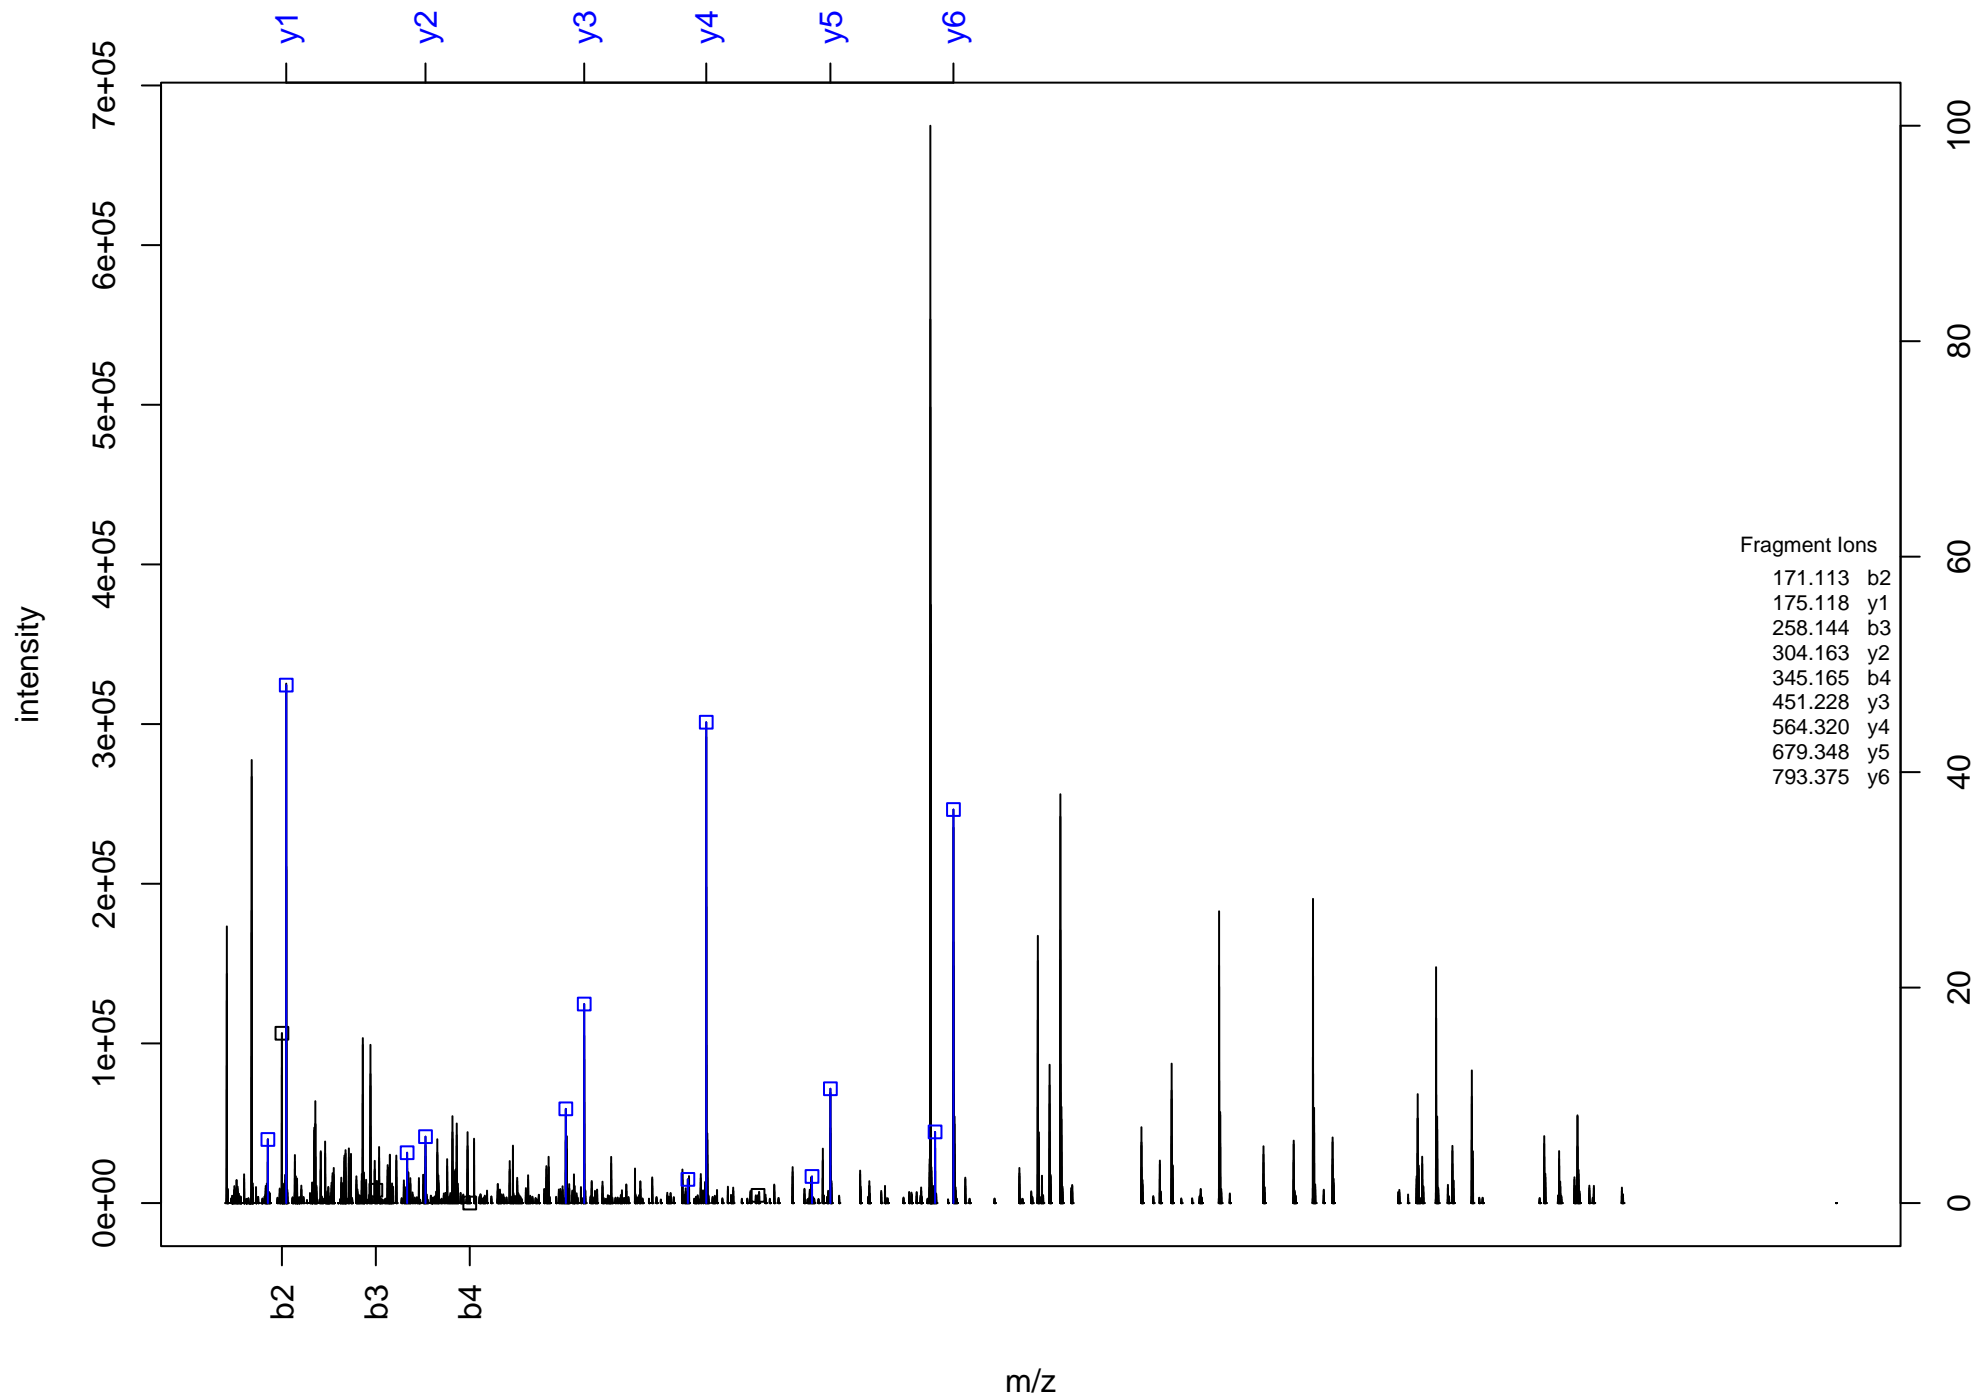

# YNQATQTFHQWR

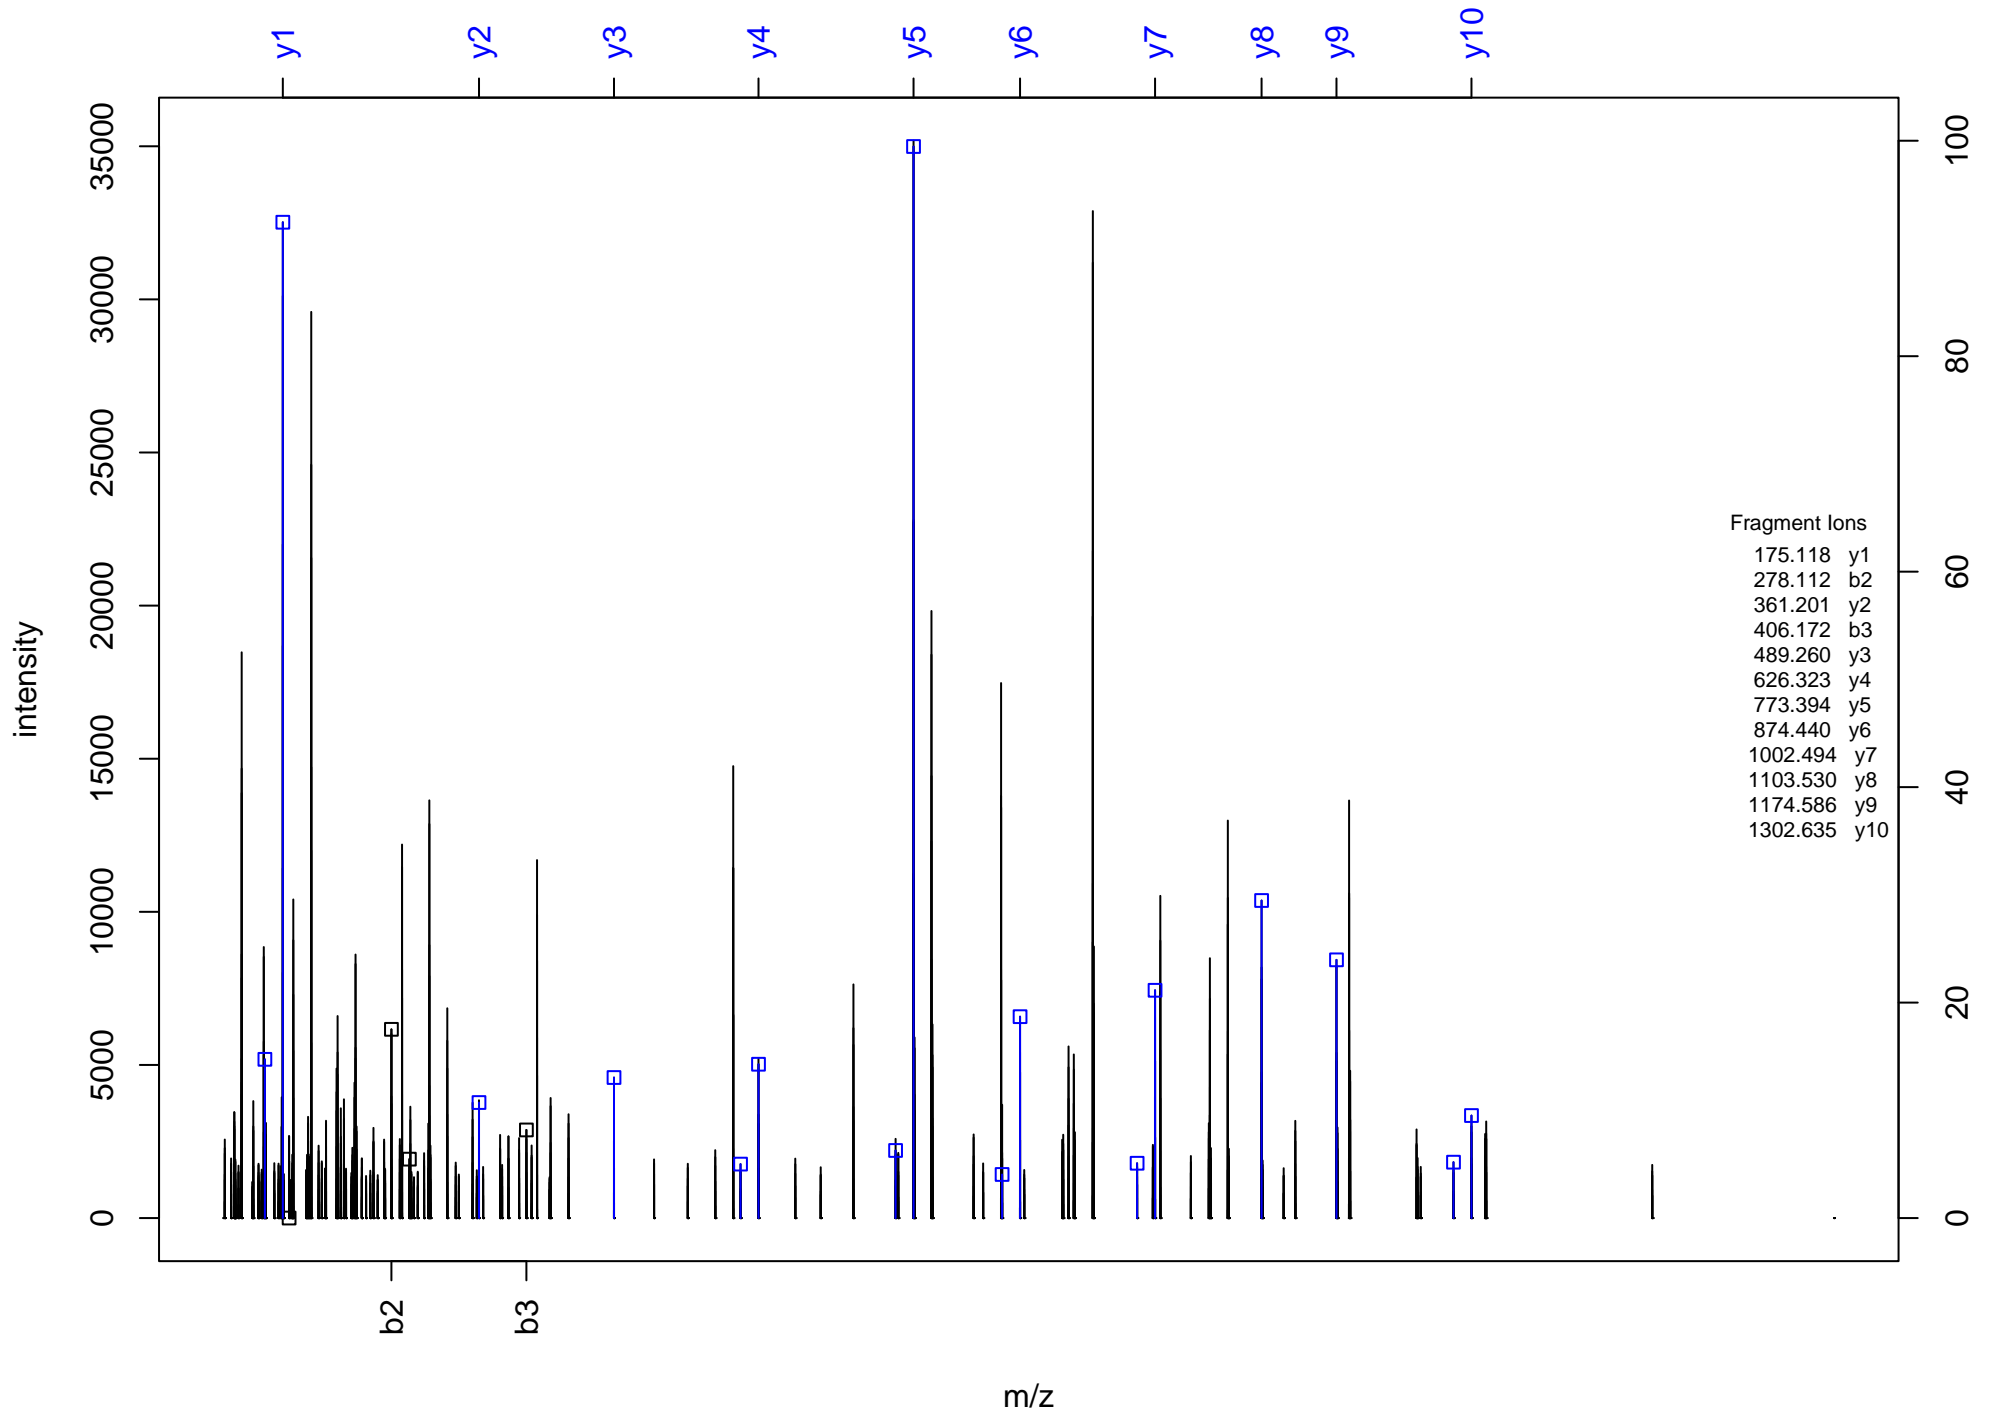

# (Ac)AANATTNPSQLLPLELVDK

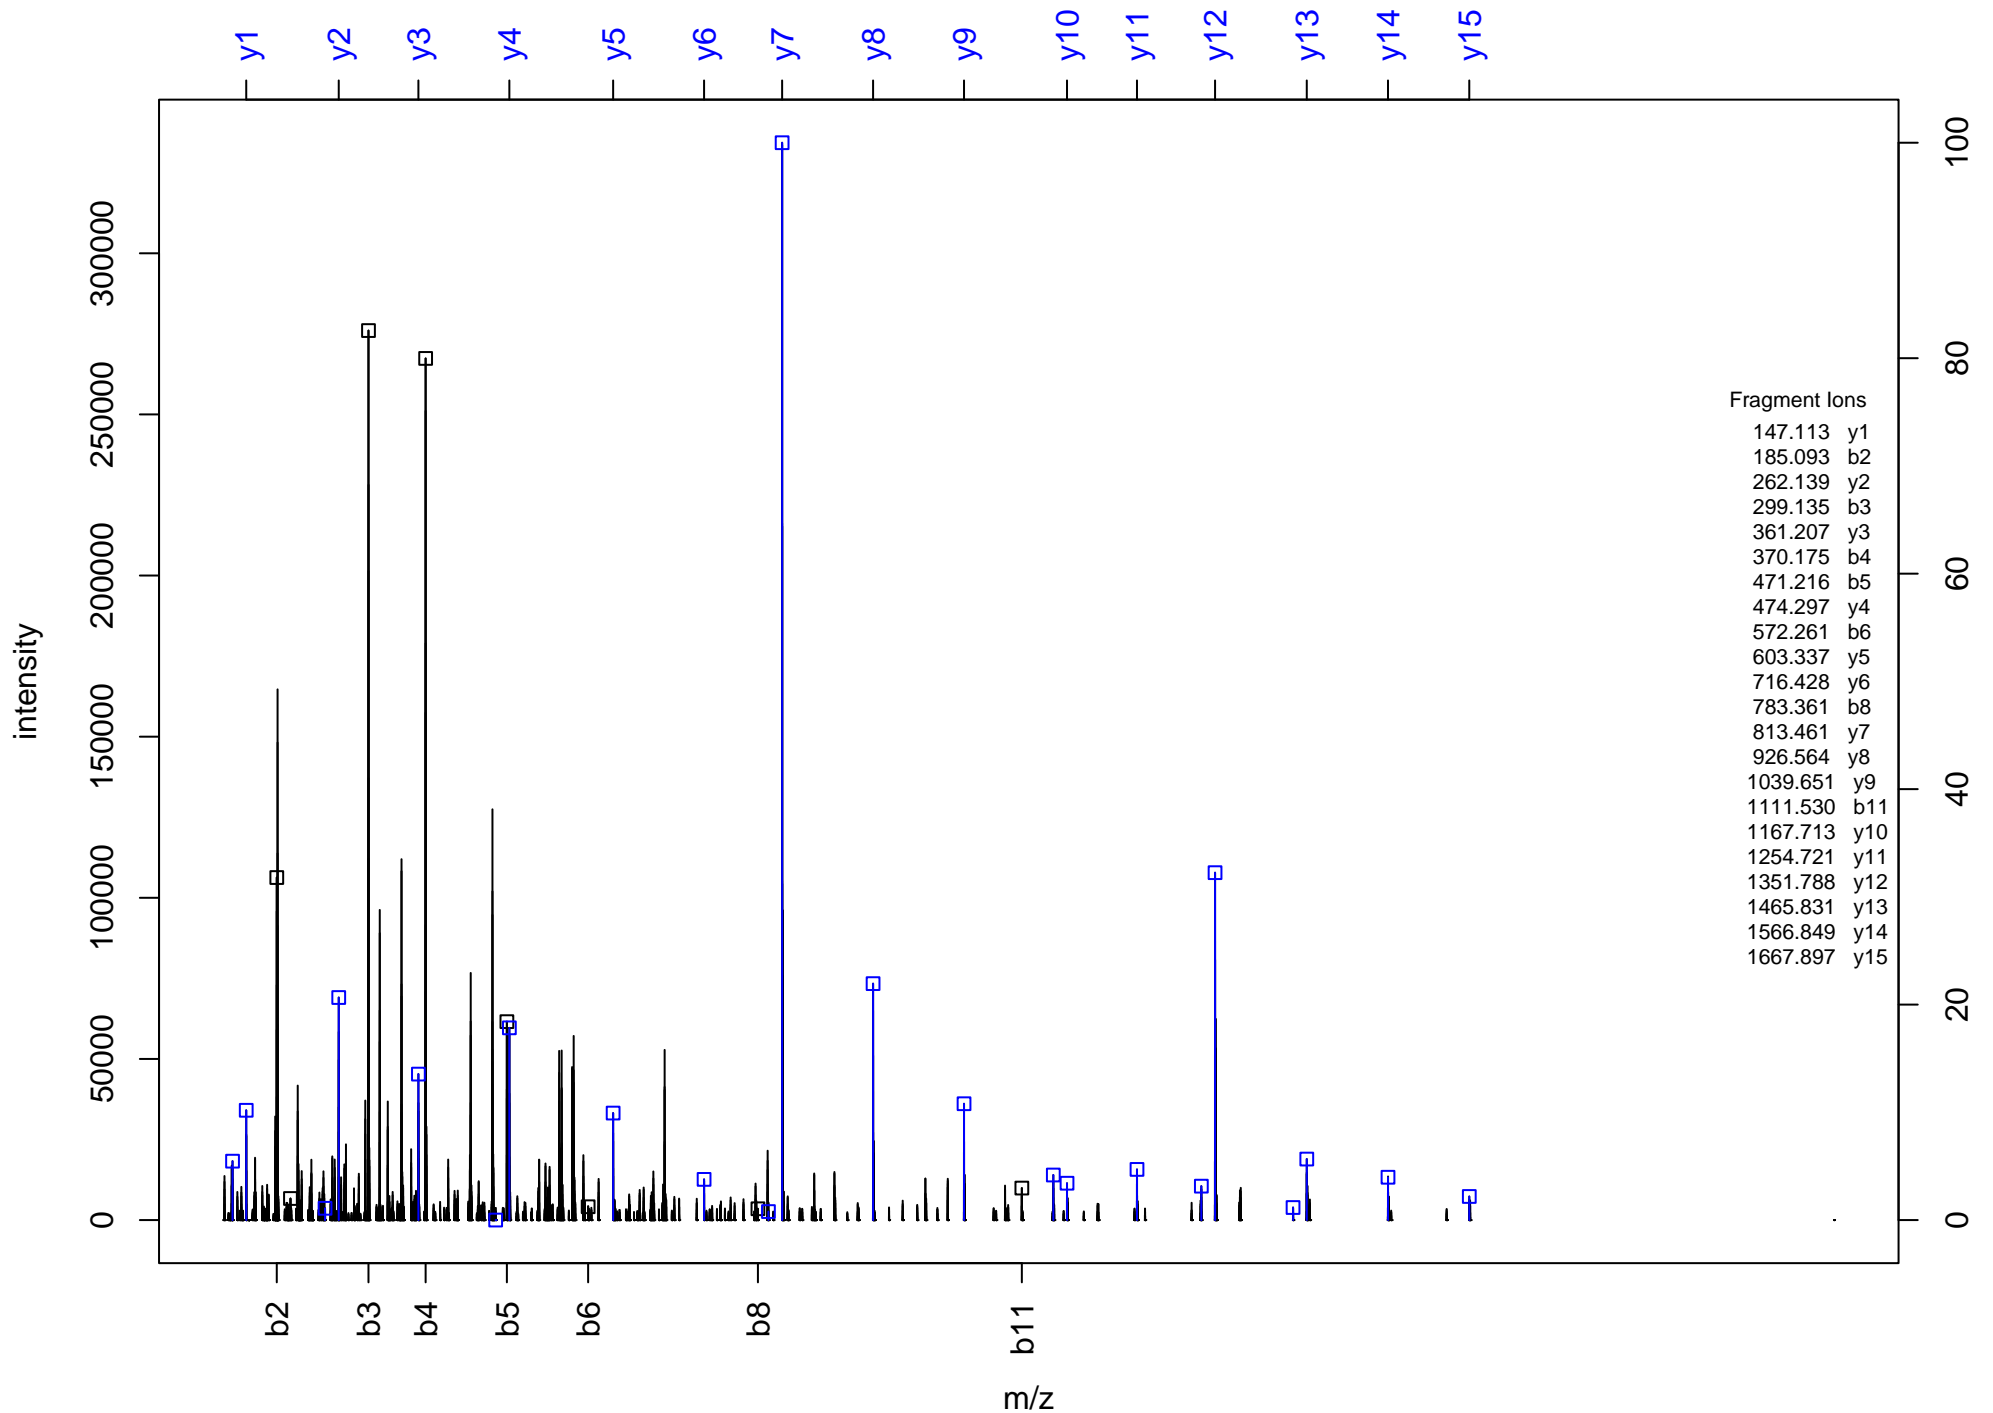

# MATDFAENELDLFR

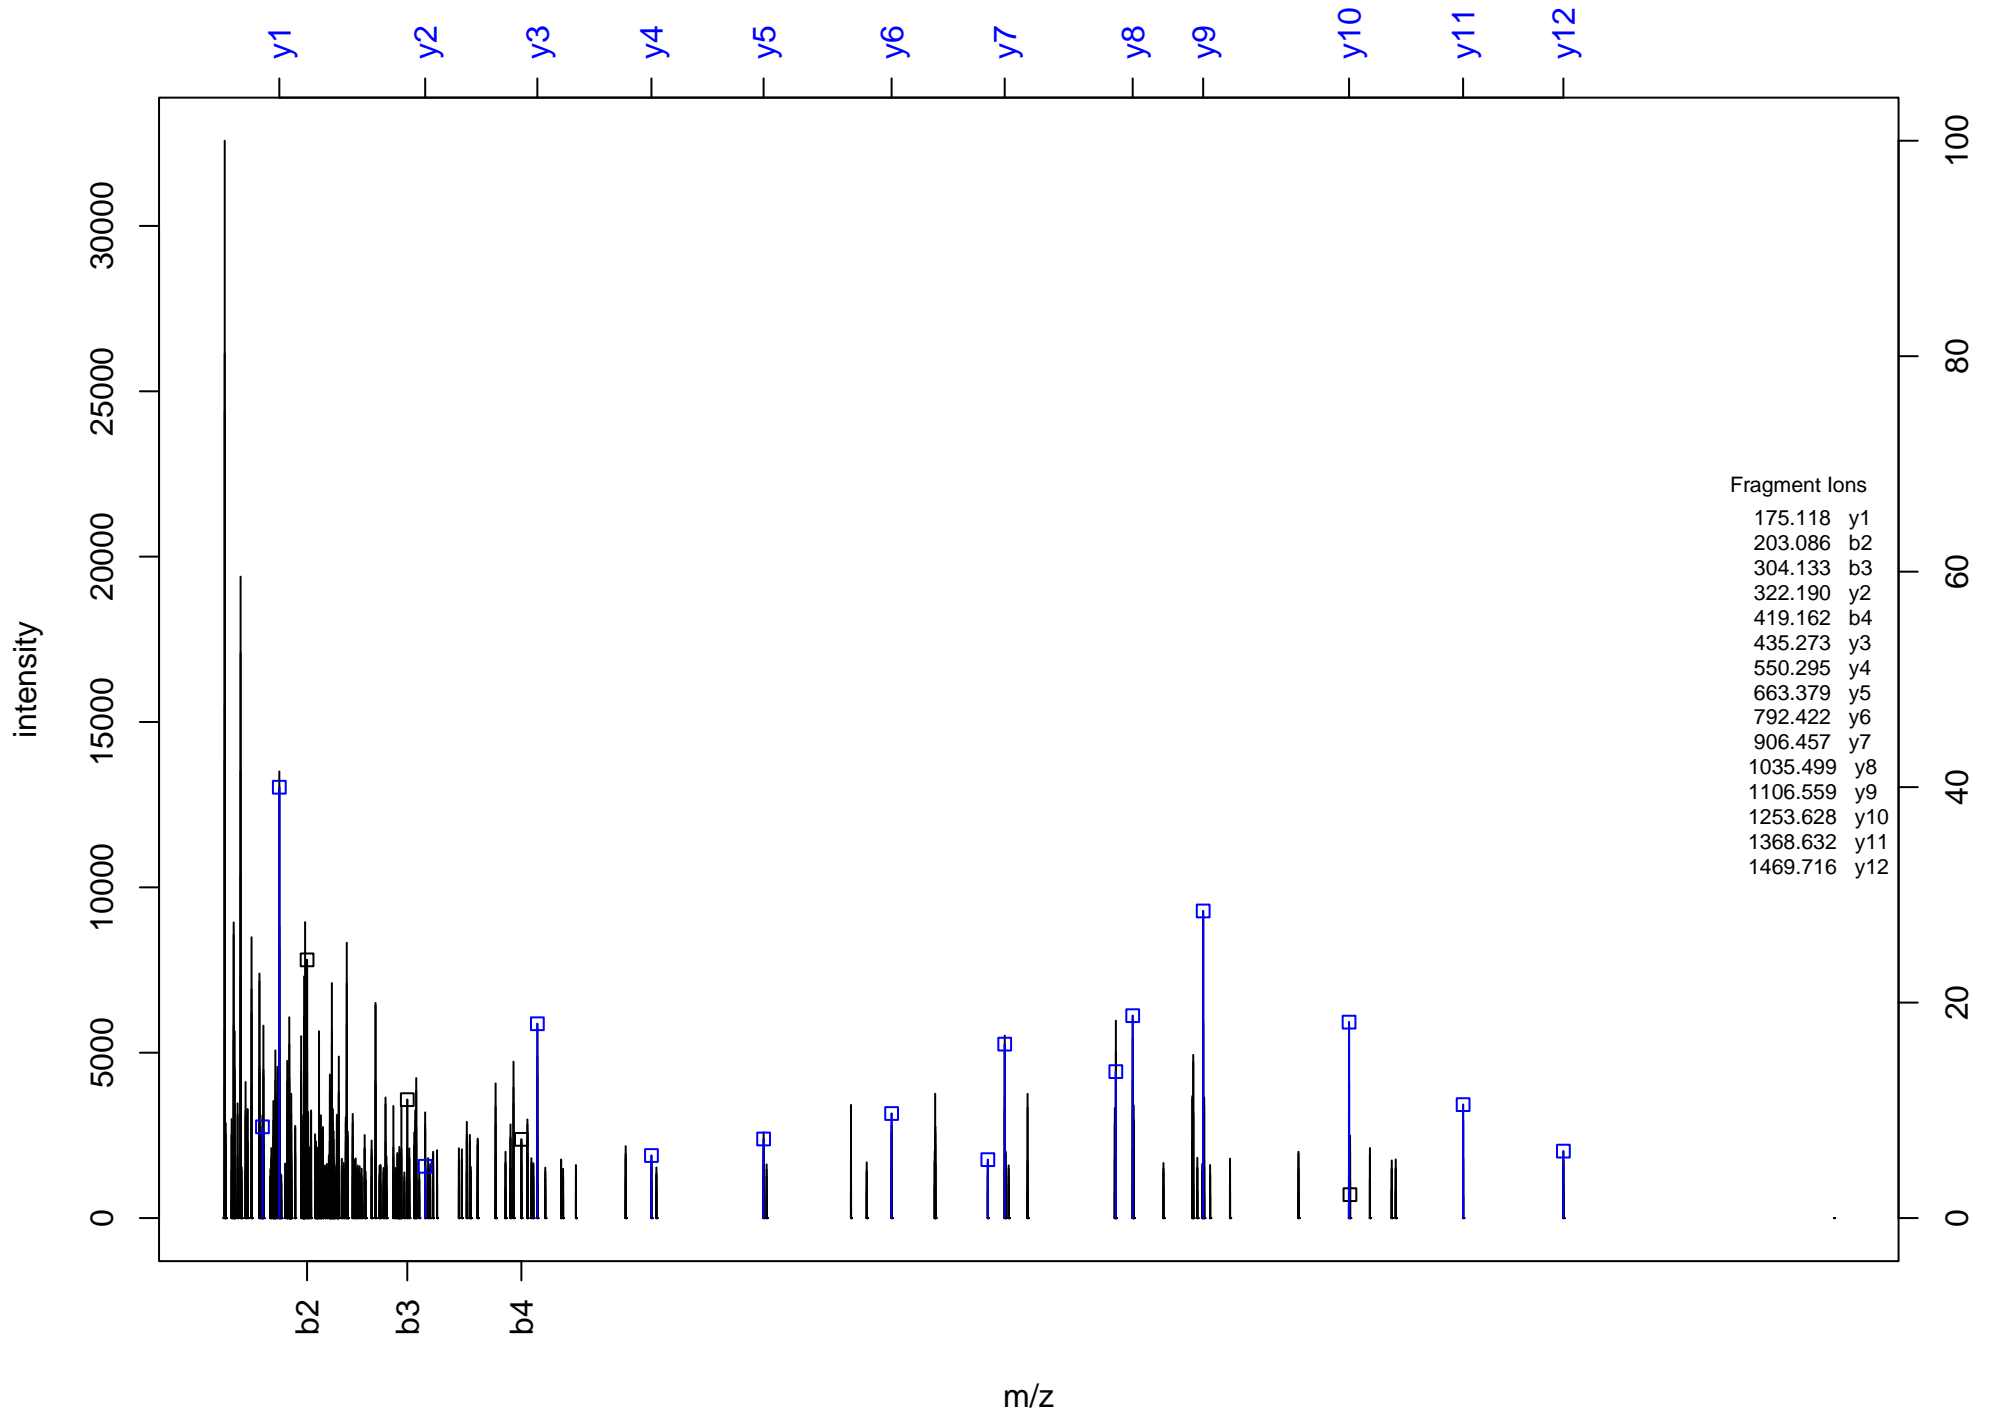



# AIECSYTSADGLK

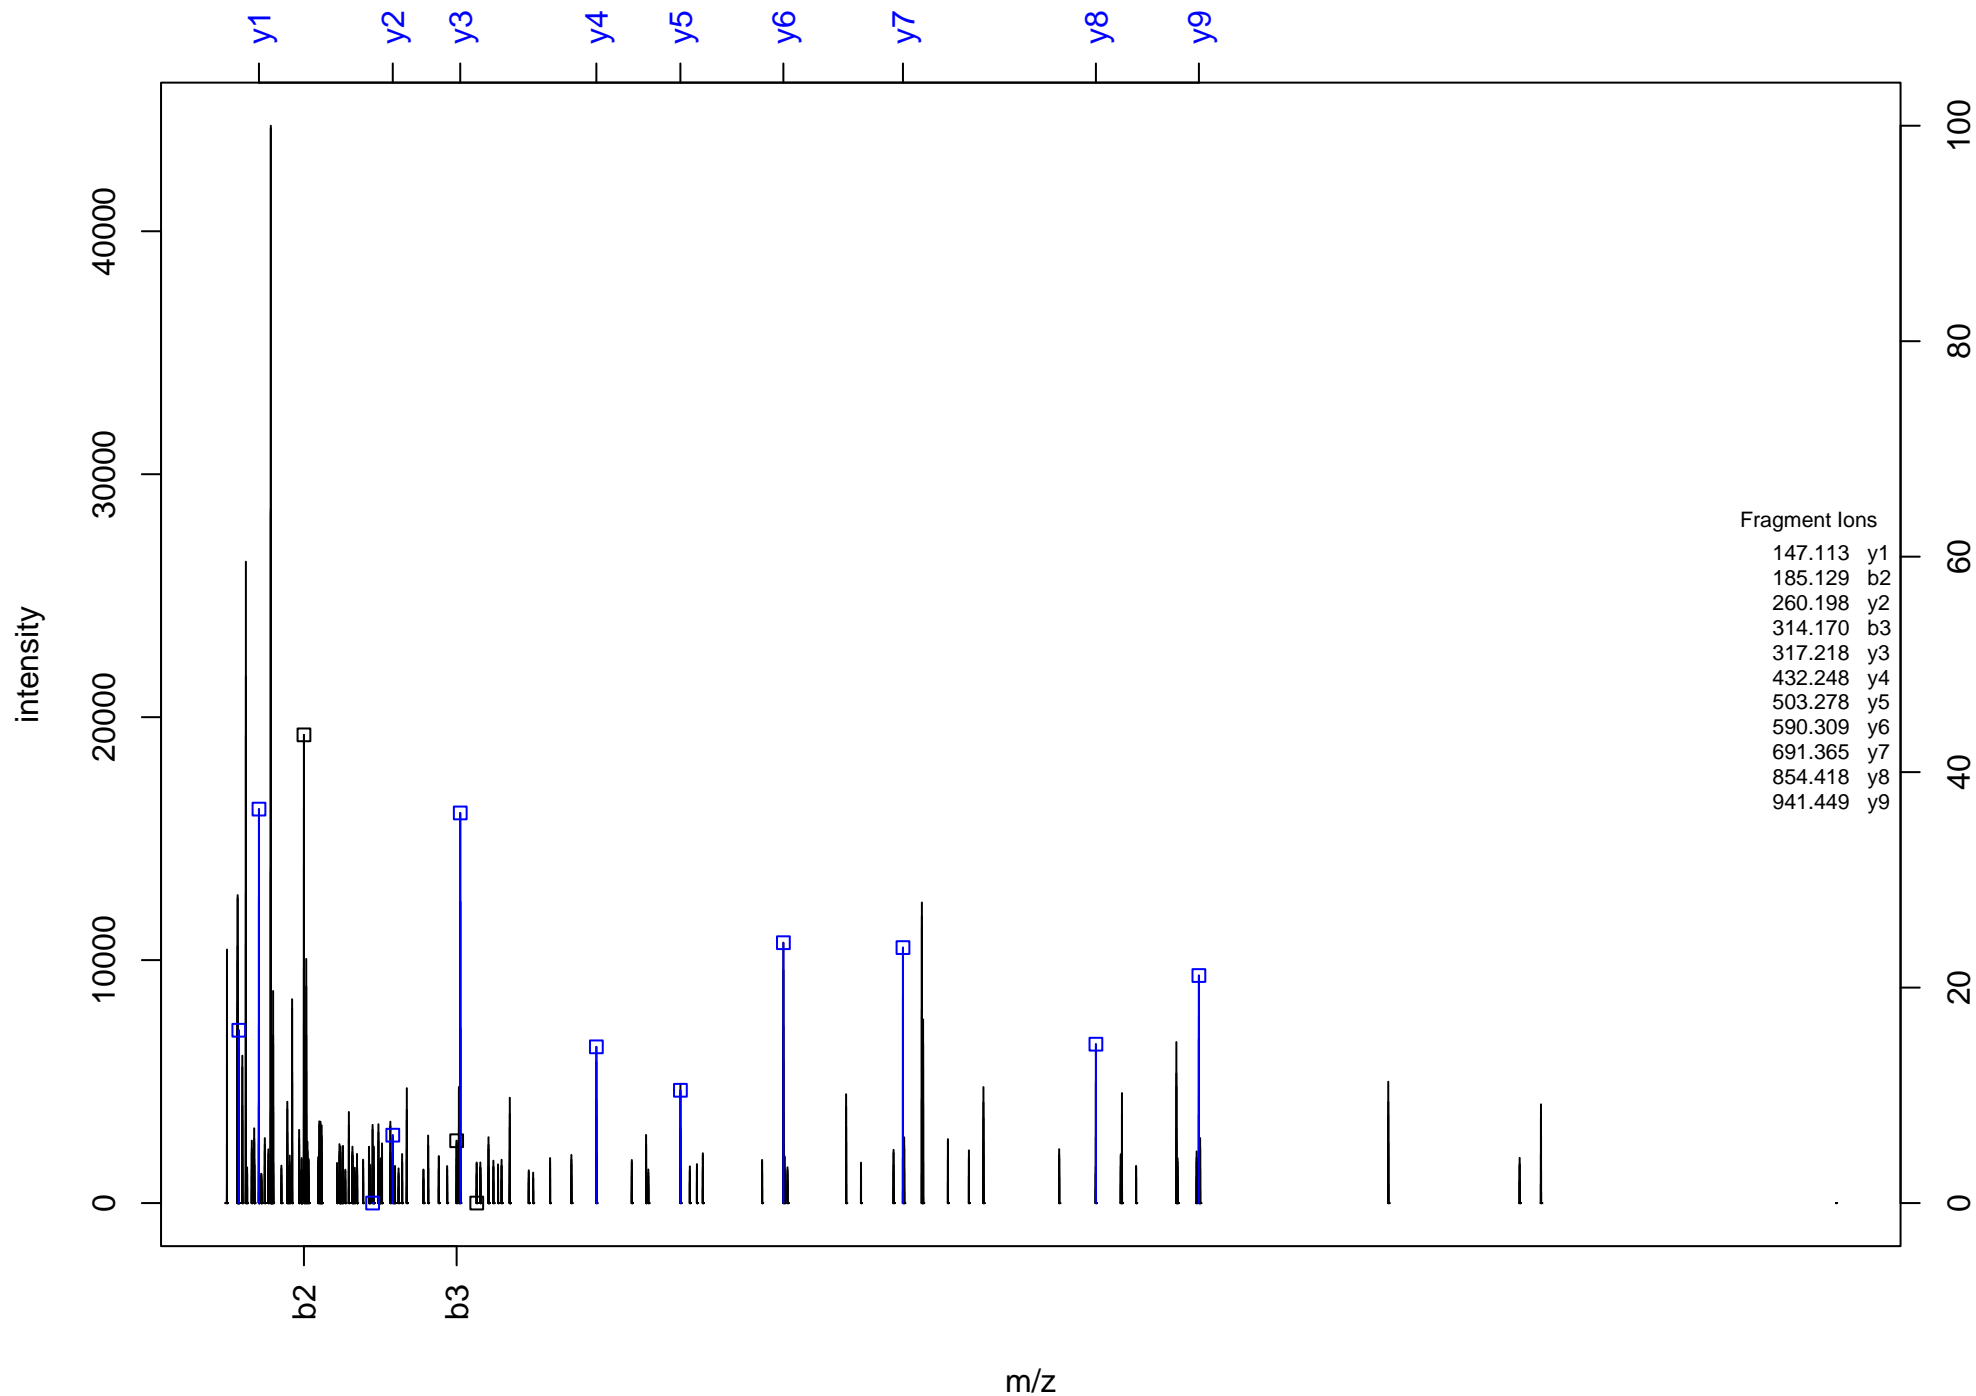

# PQNVVLPGPAPWGFR

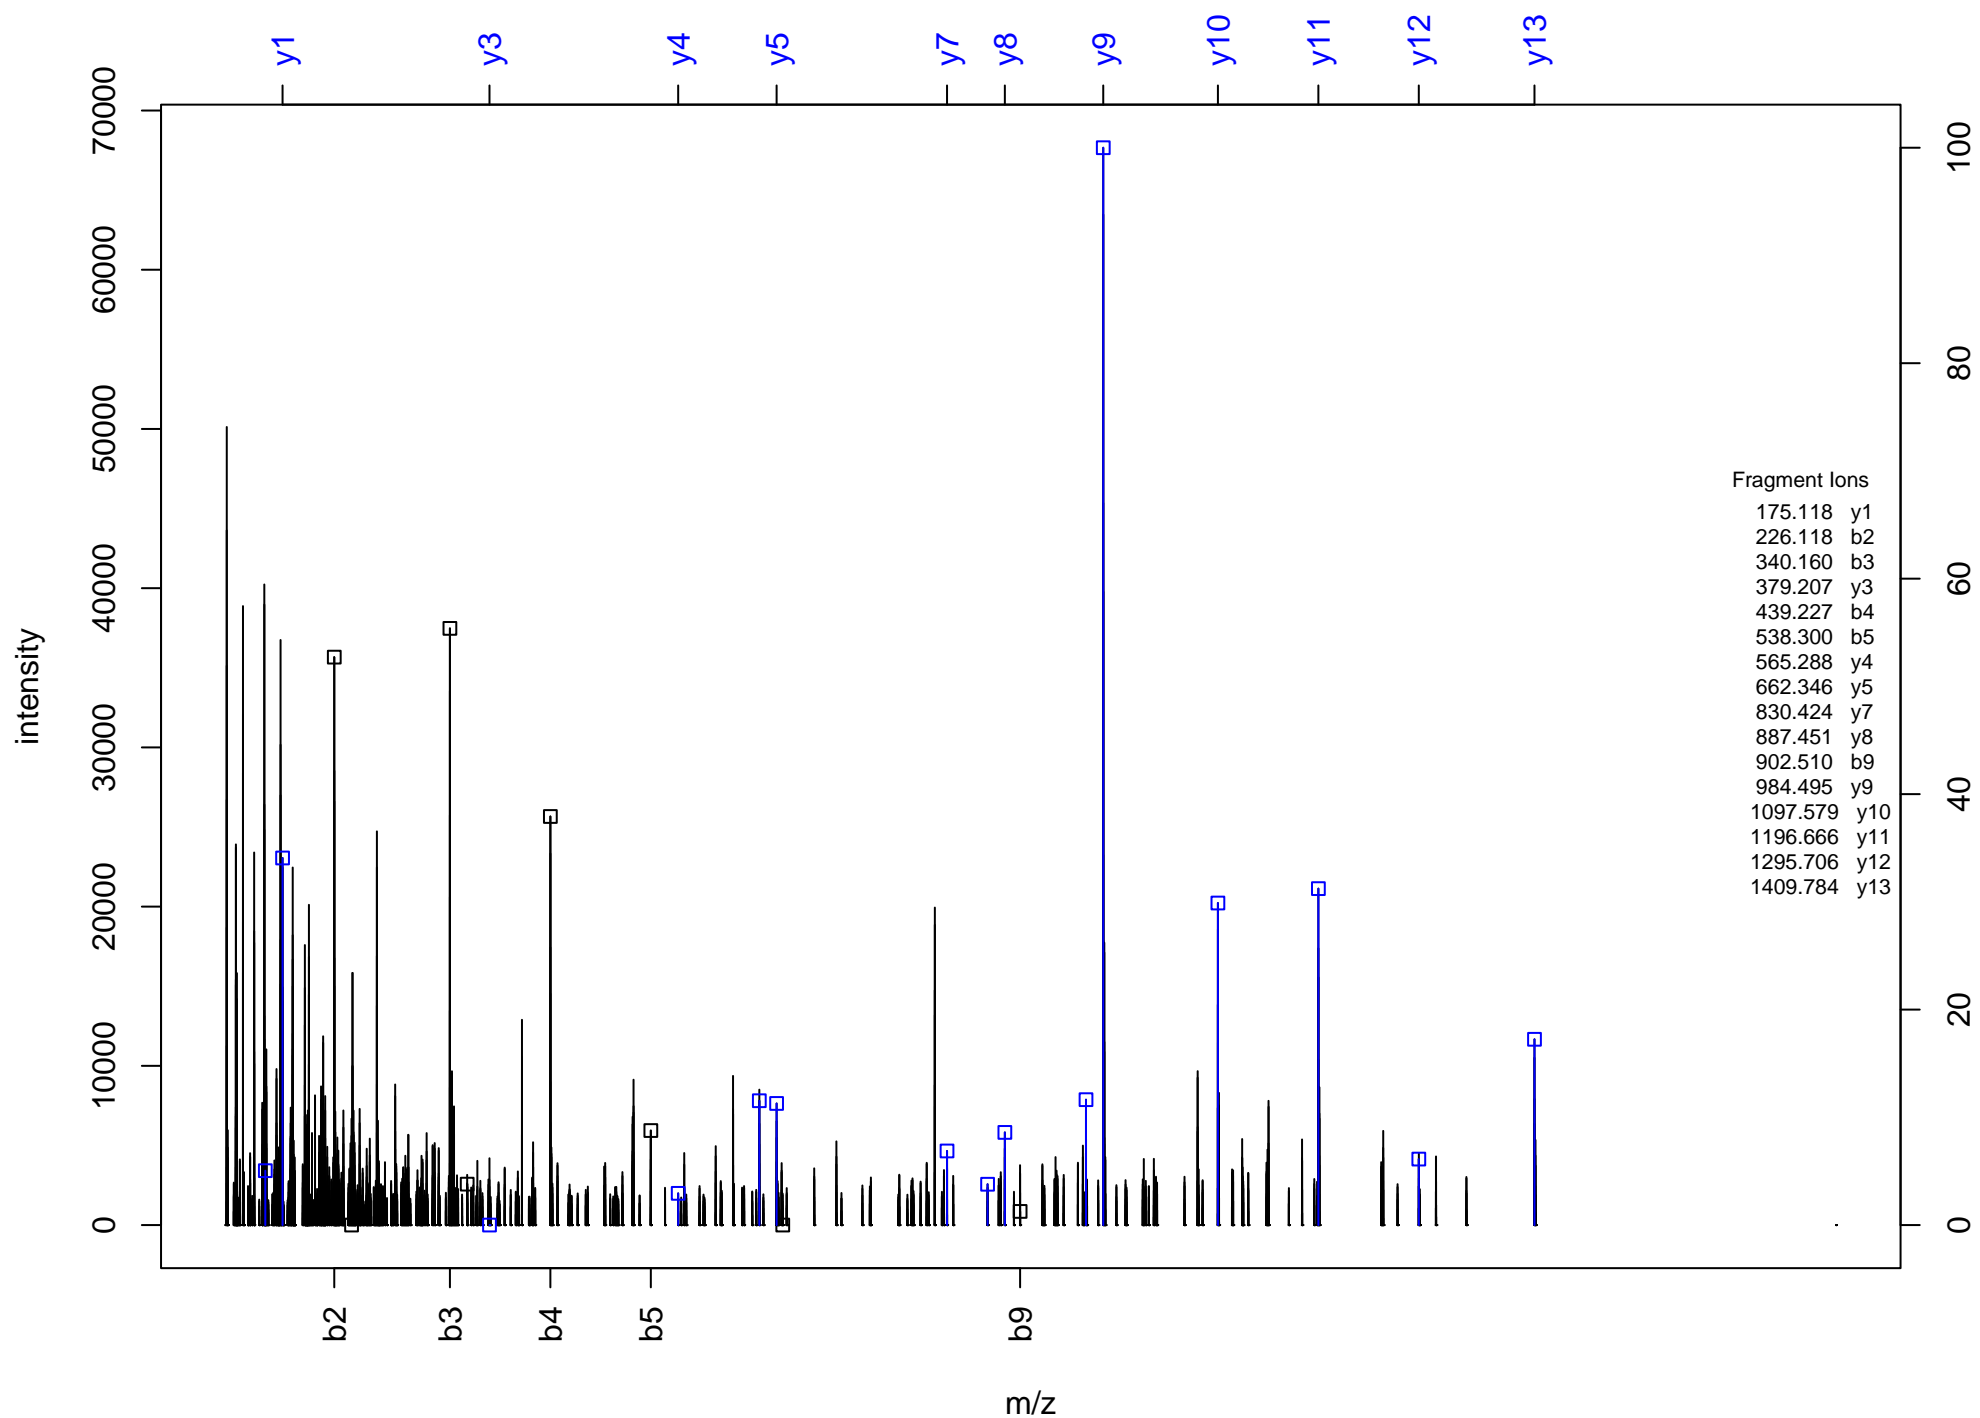

# EETRNNNSLVSKYHPN^FWM\*DGR

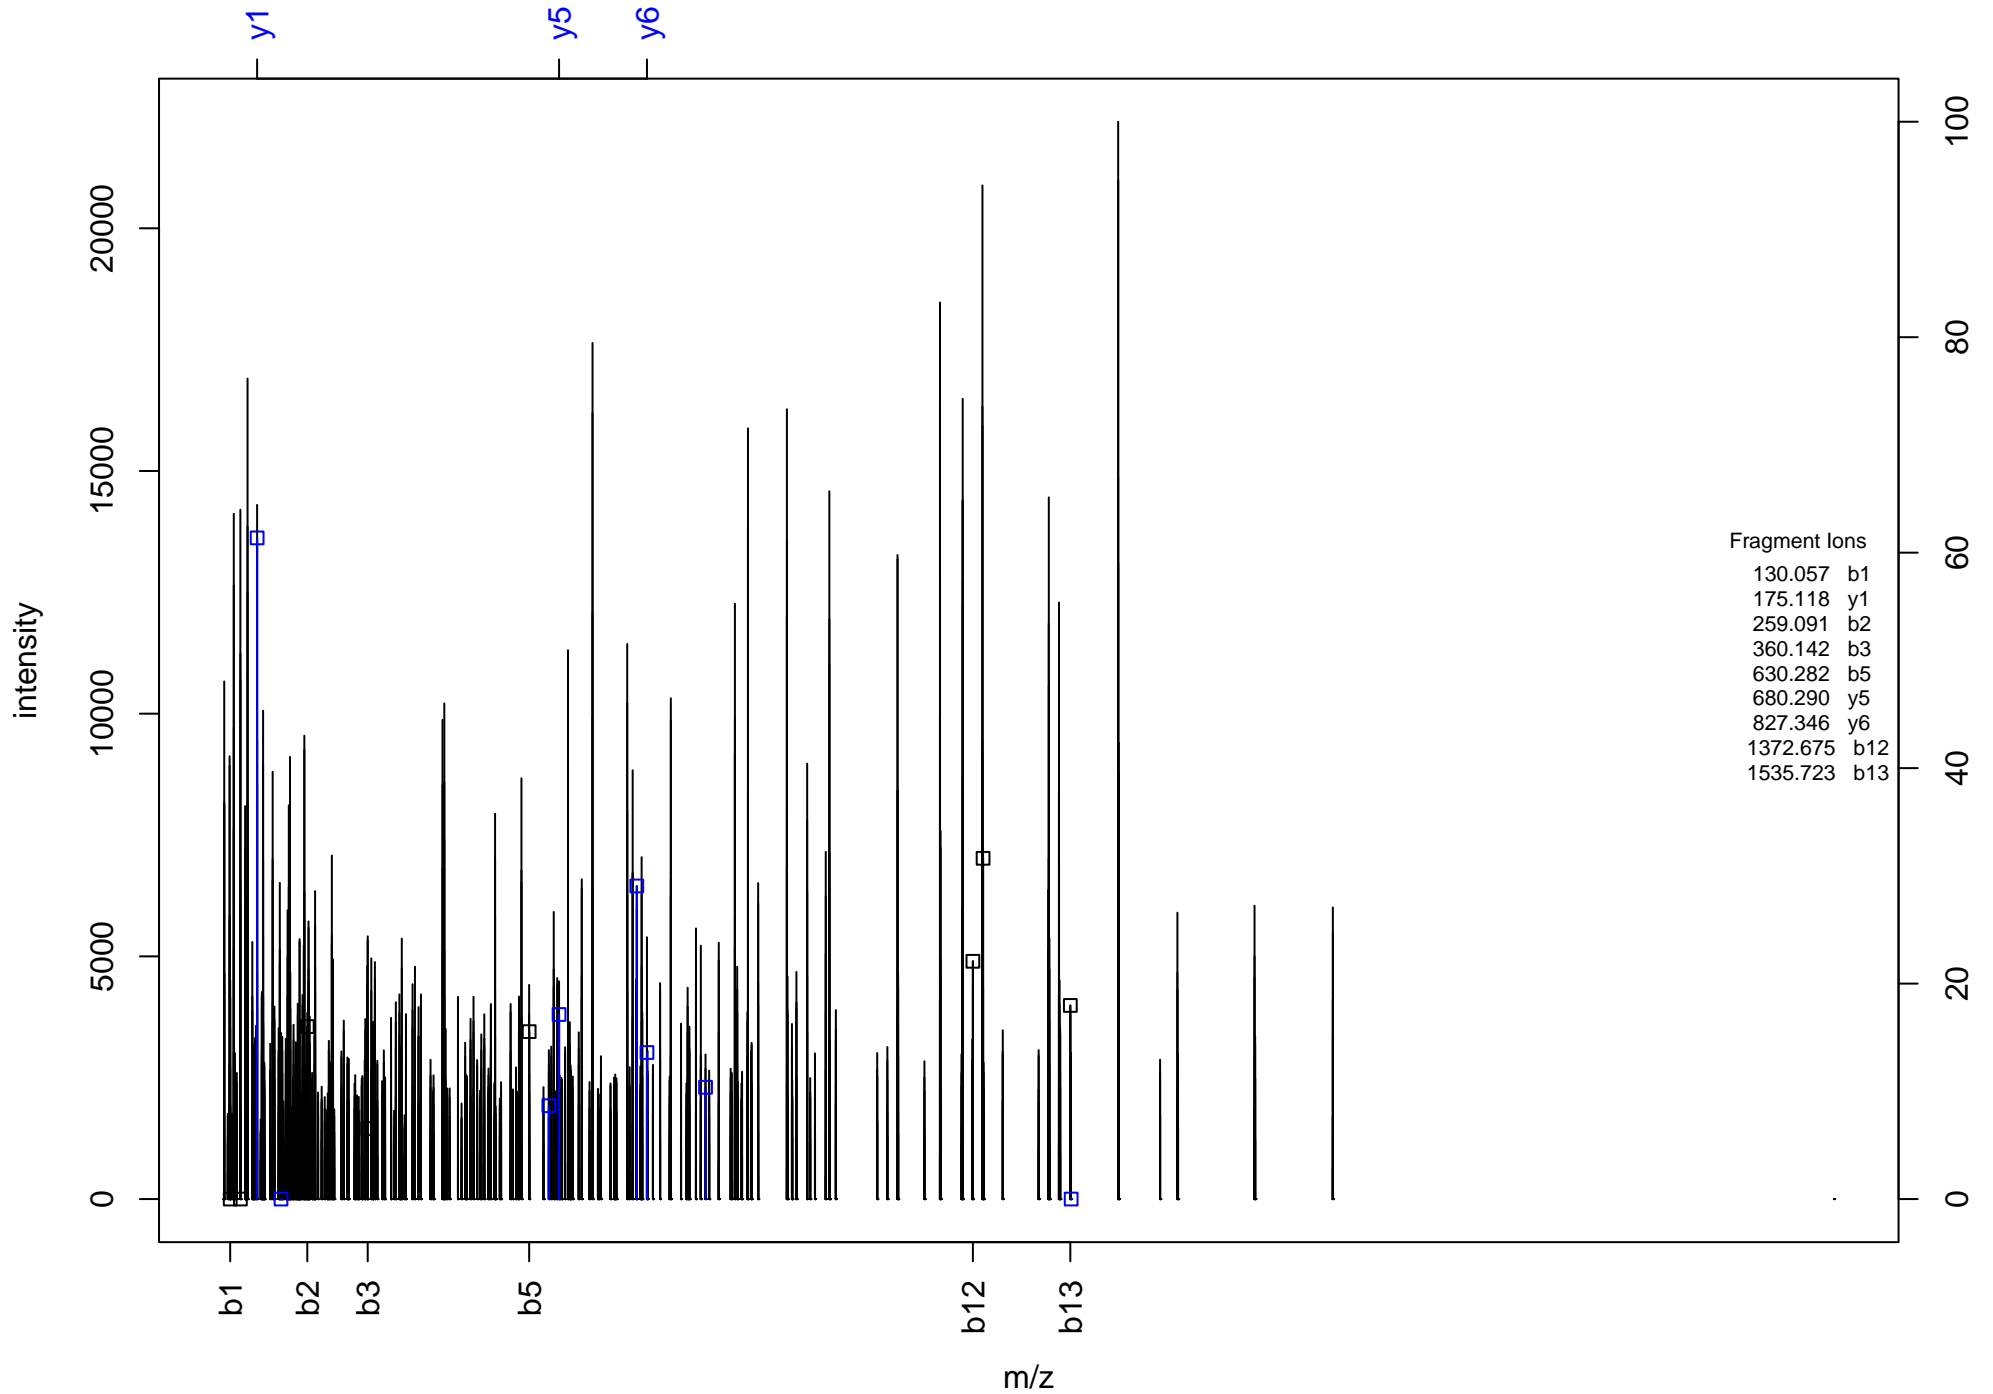

# SSIQVYADK

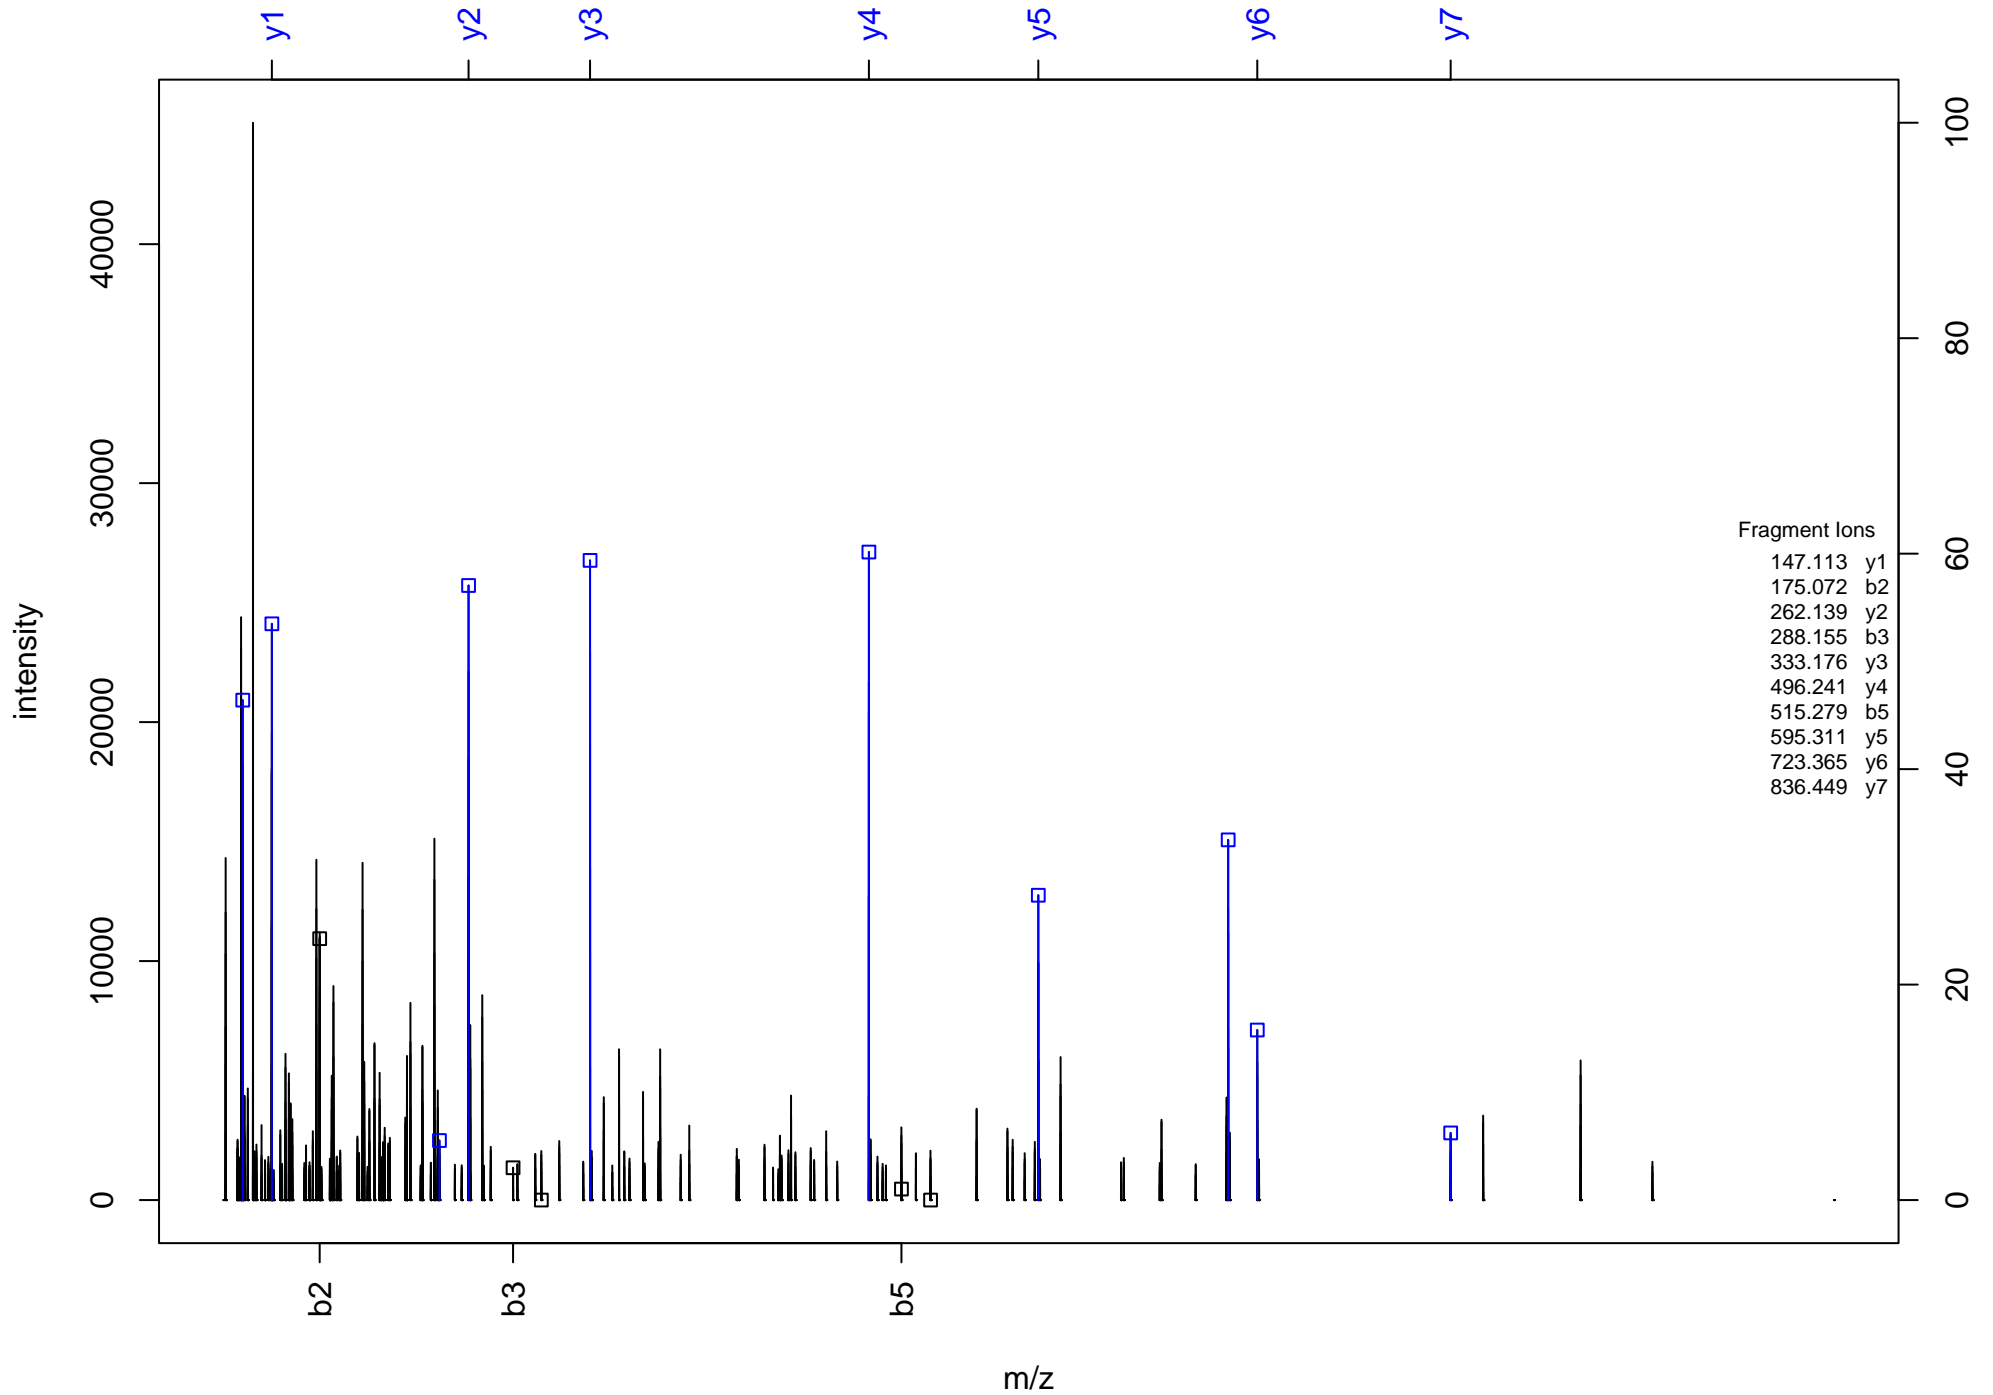

# VLLESEQFLTELTR

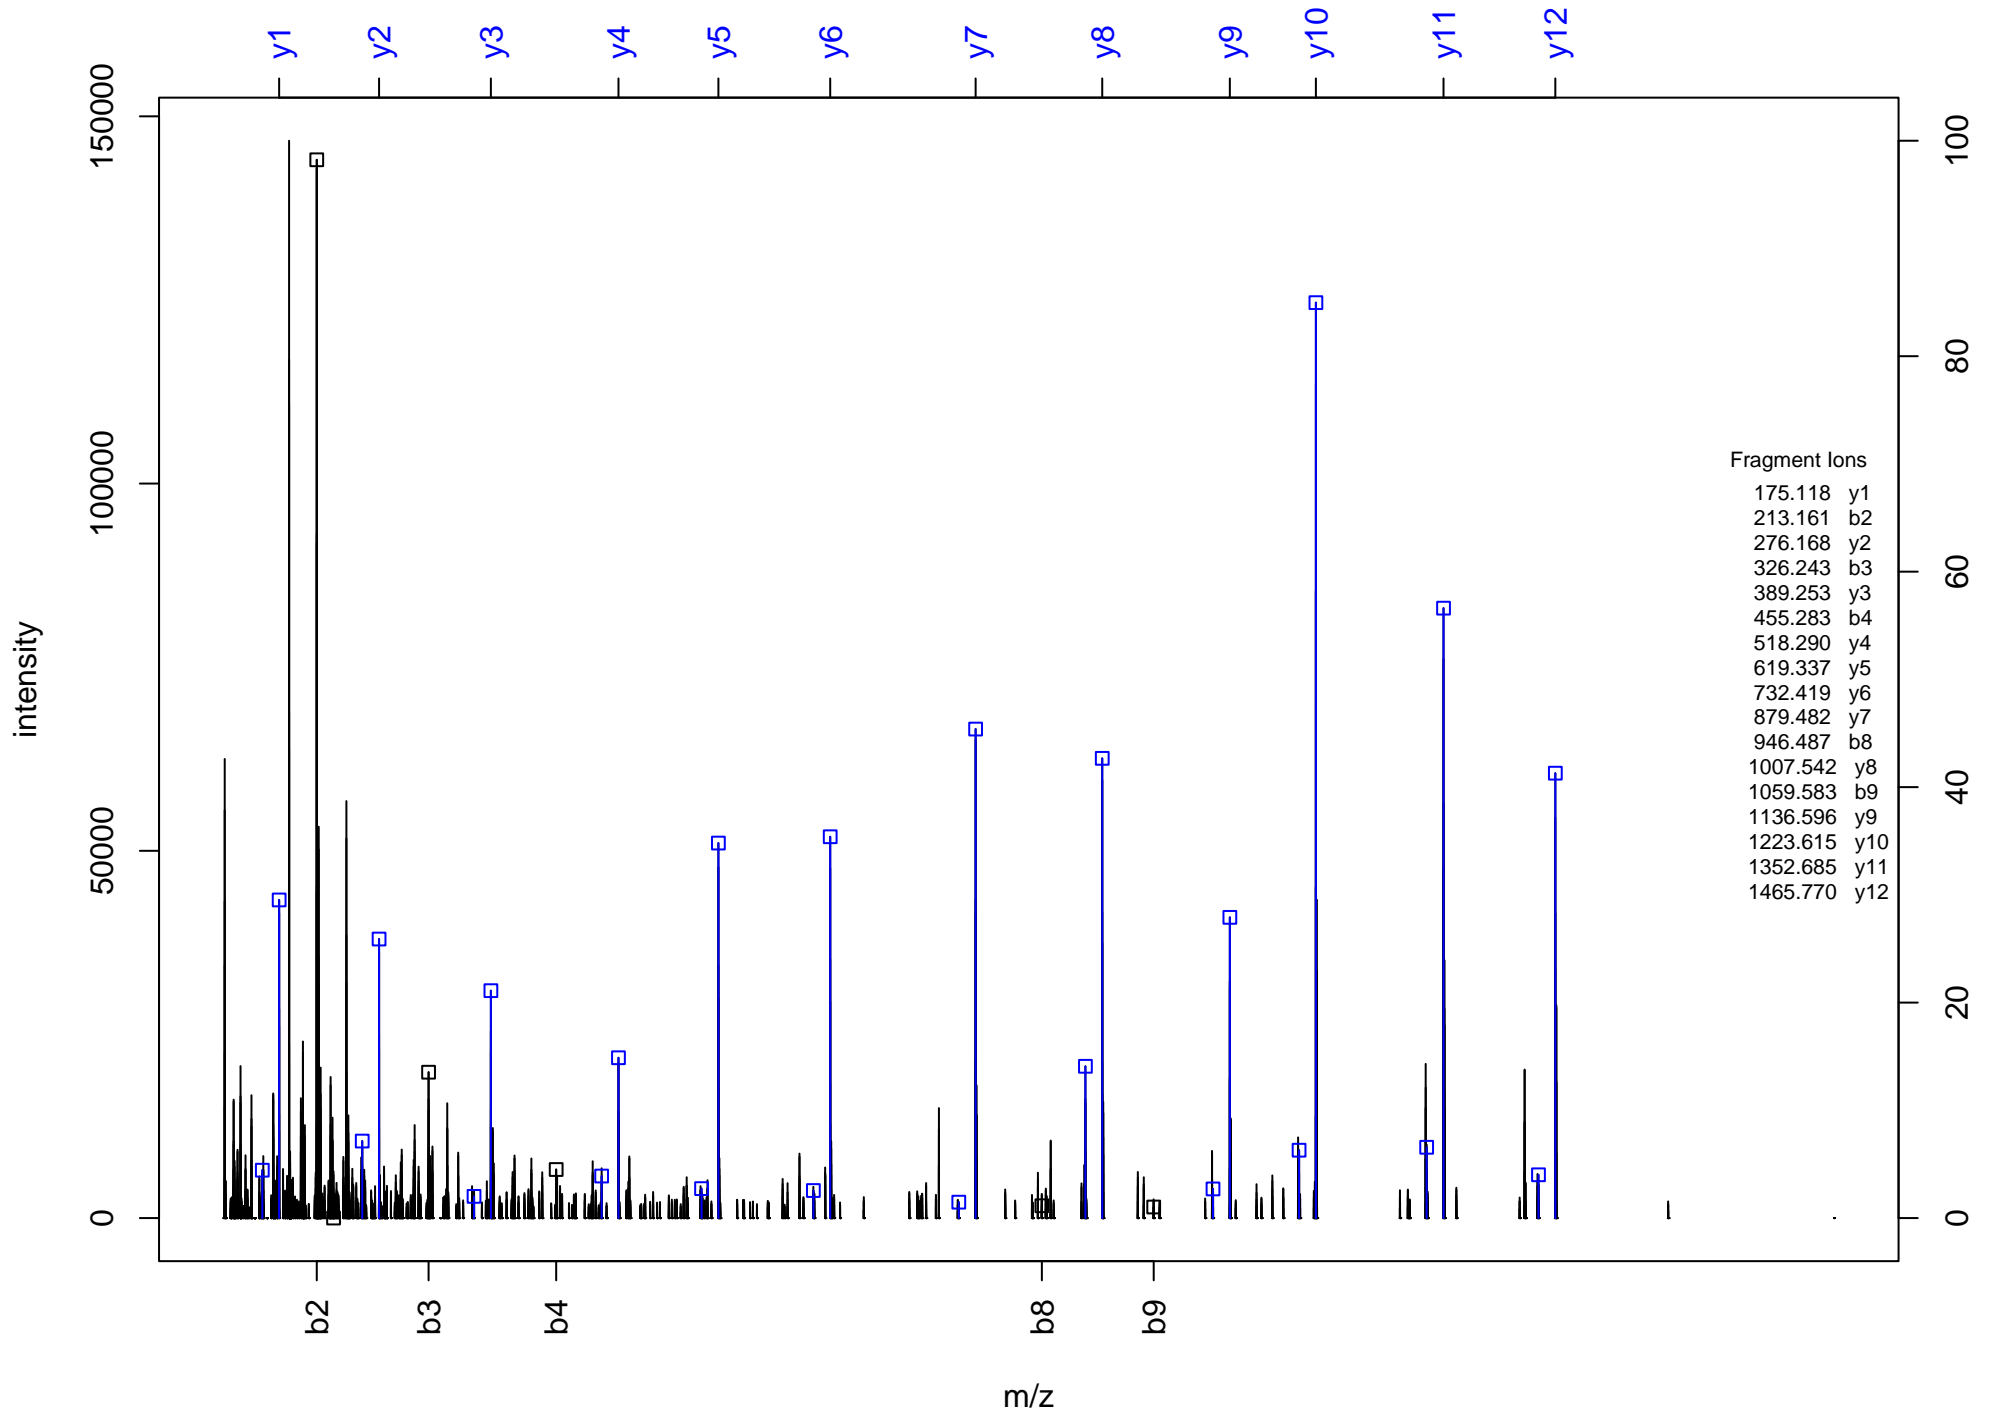

# (Ac)SDQDHSMDEVAVVK

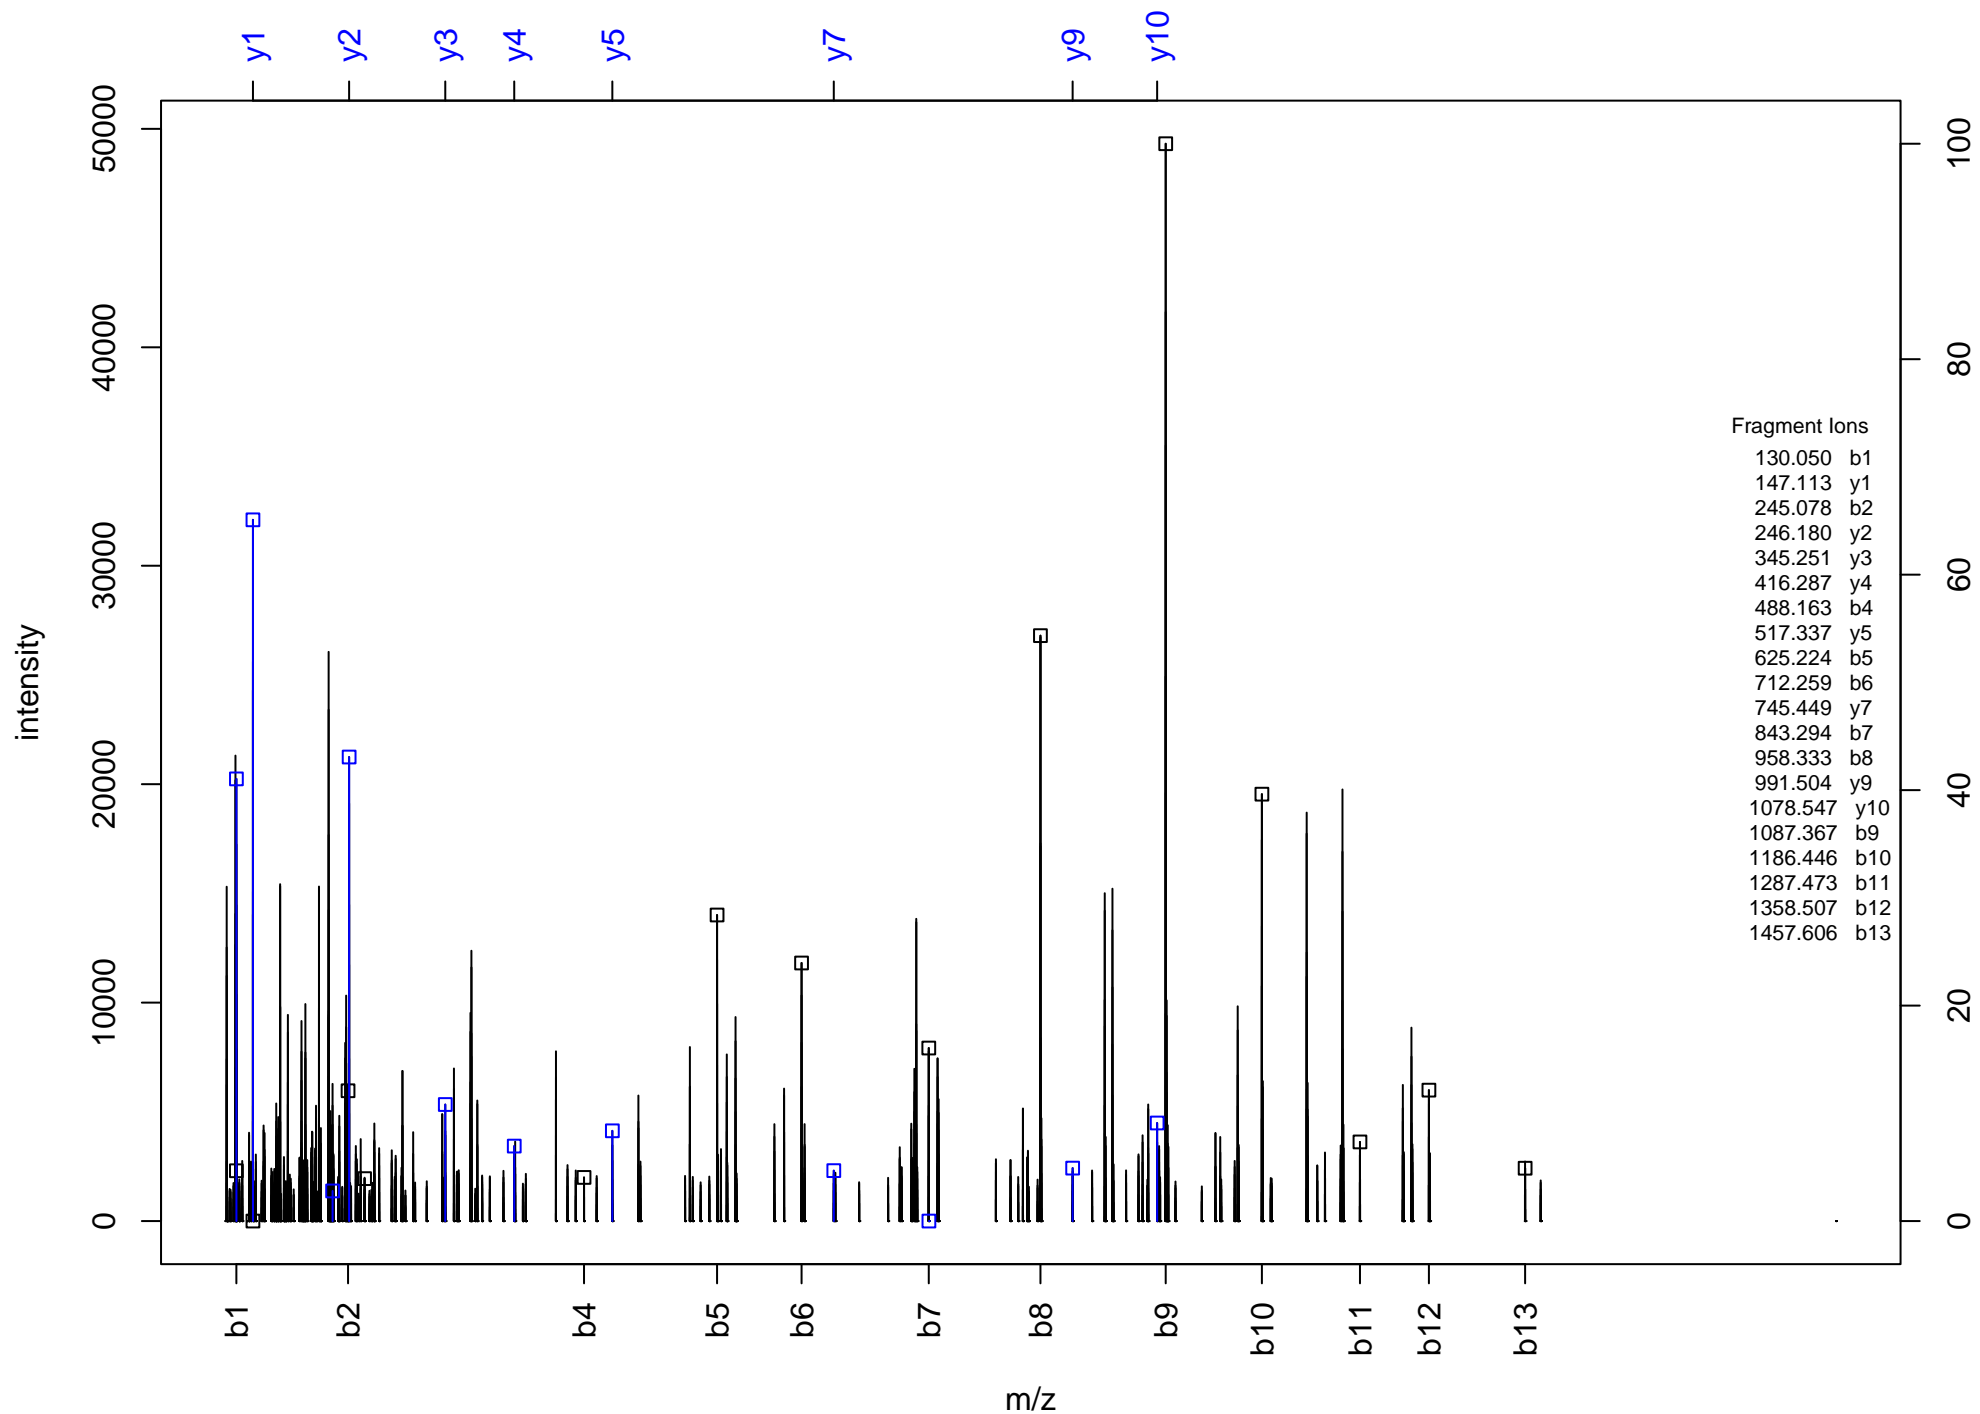

# ETEESETPVEADLTEK

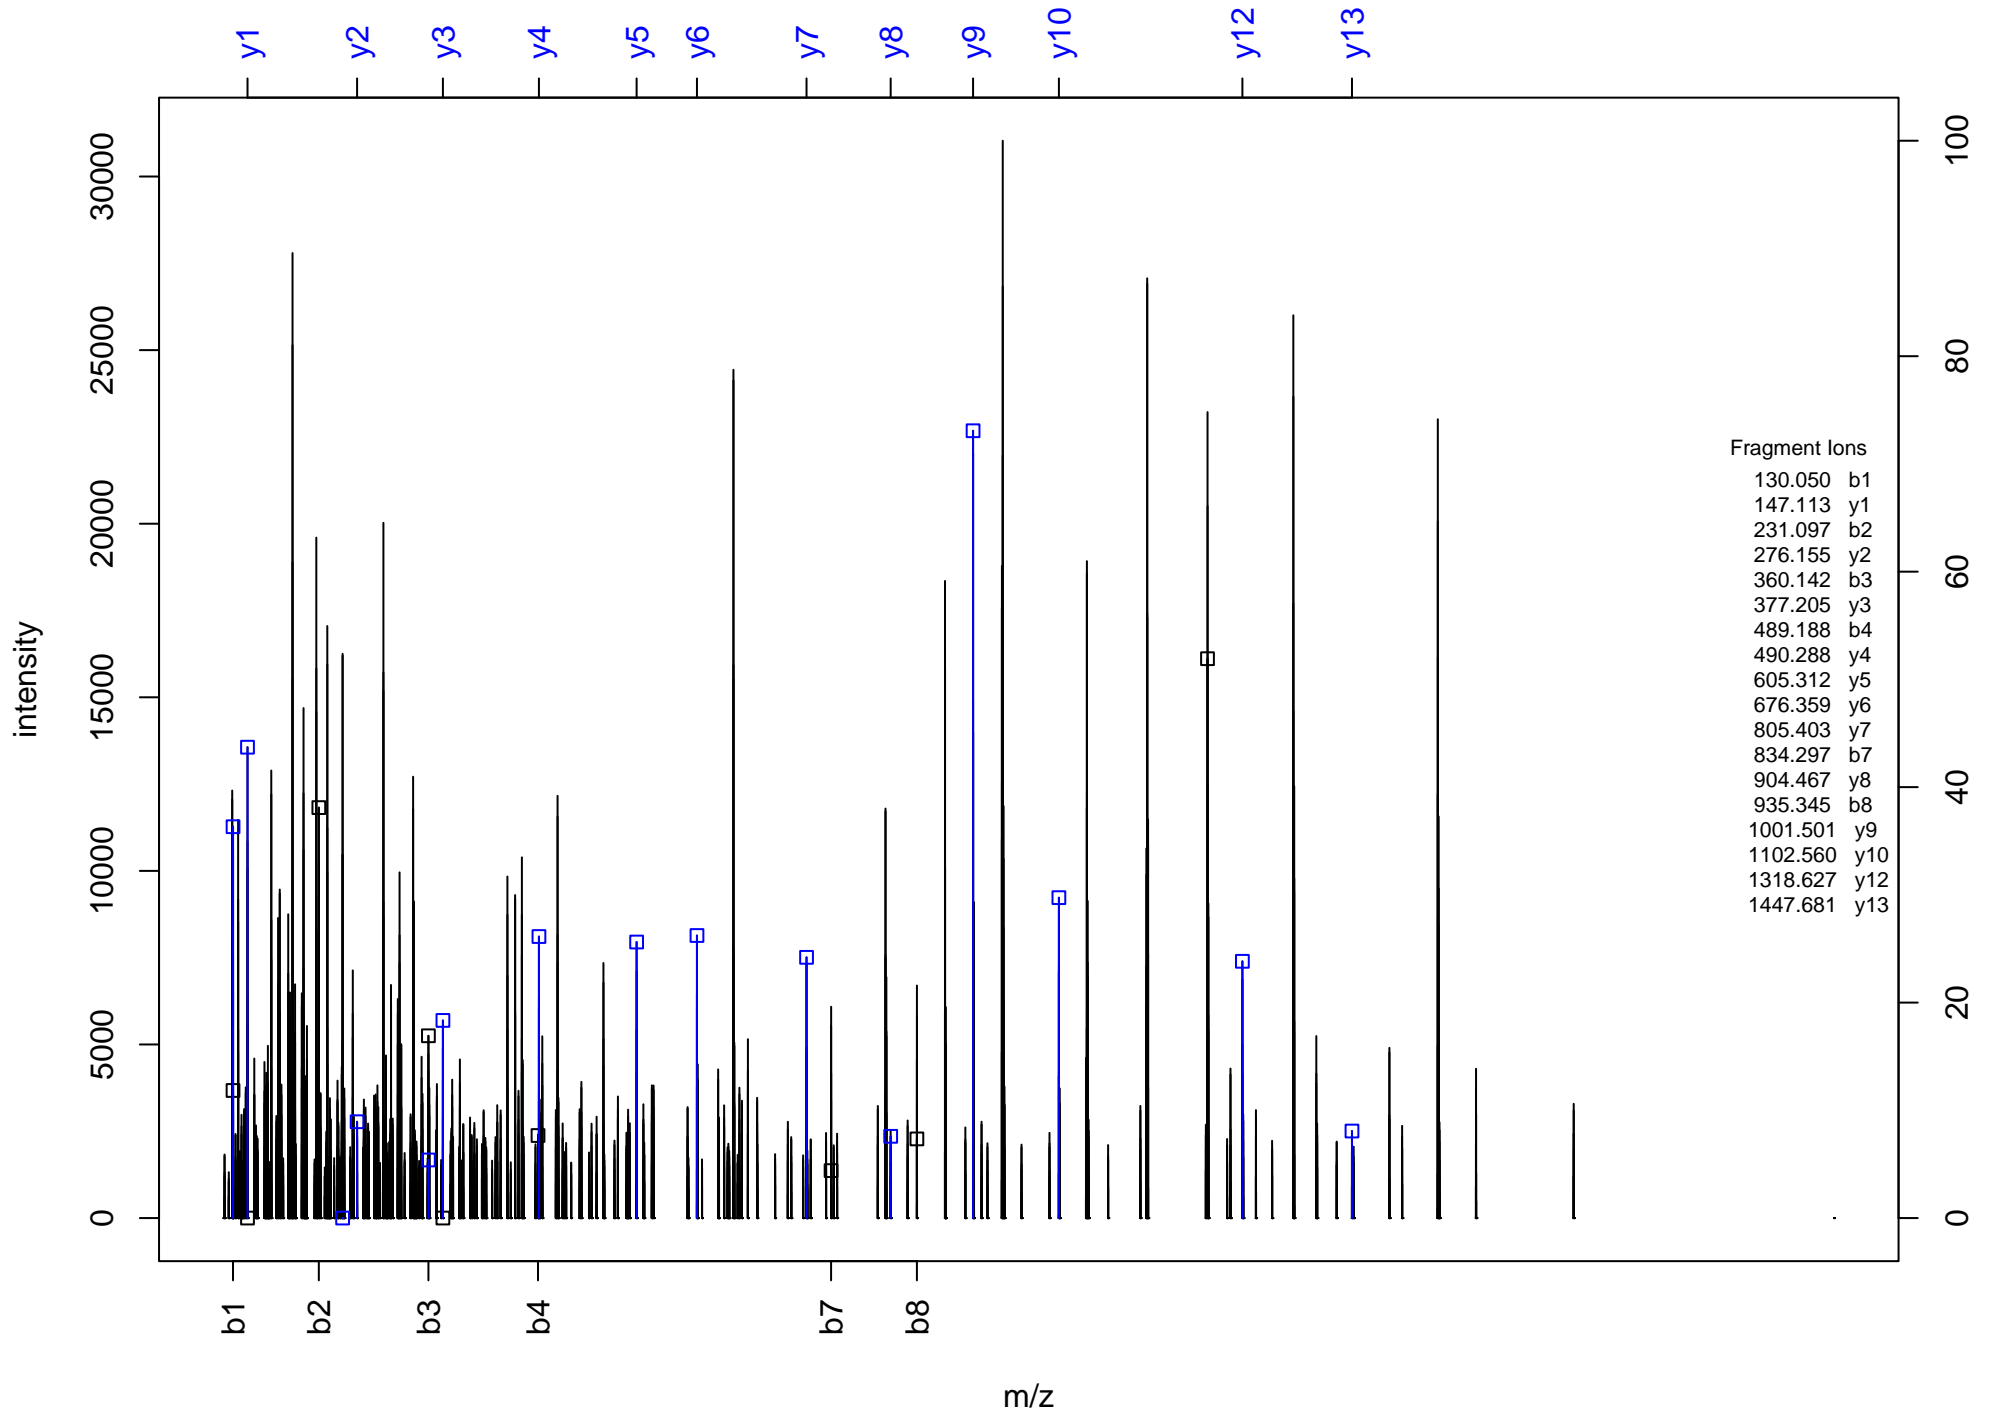

# SEVFYPGETVVHGPGEATALEWGPNTWMVEYGR

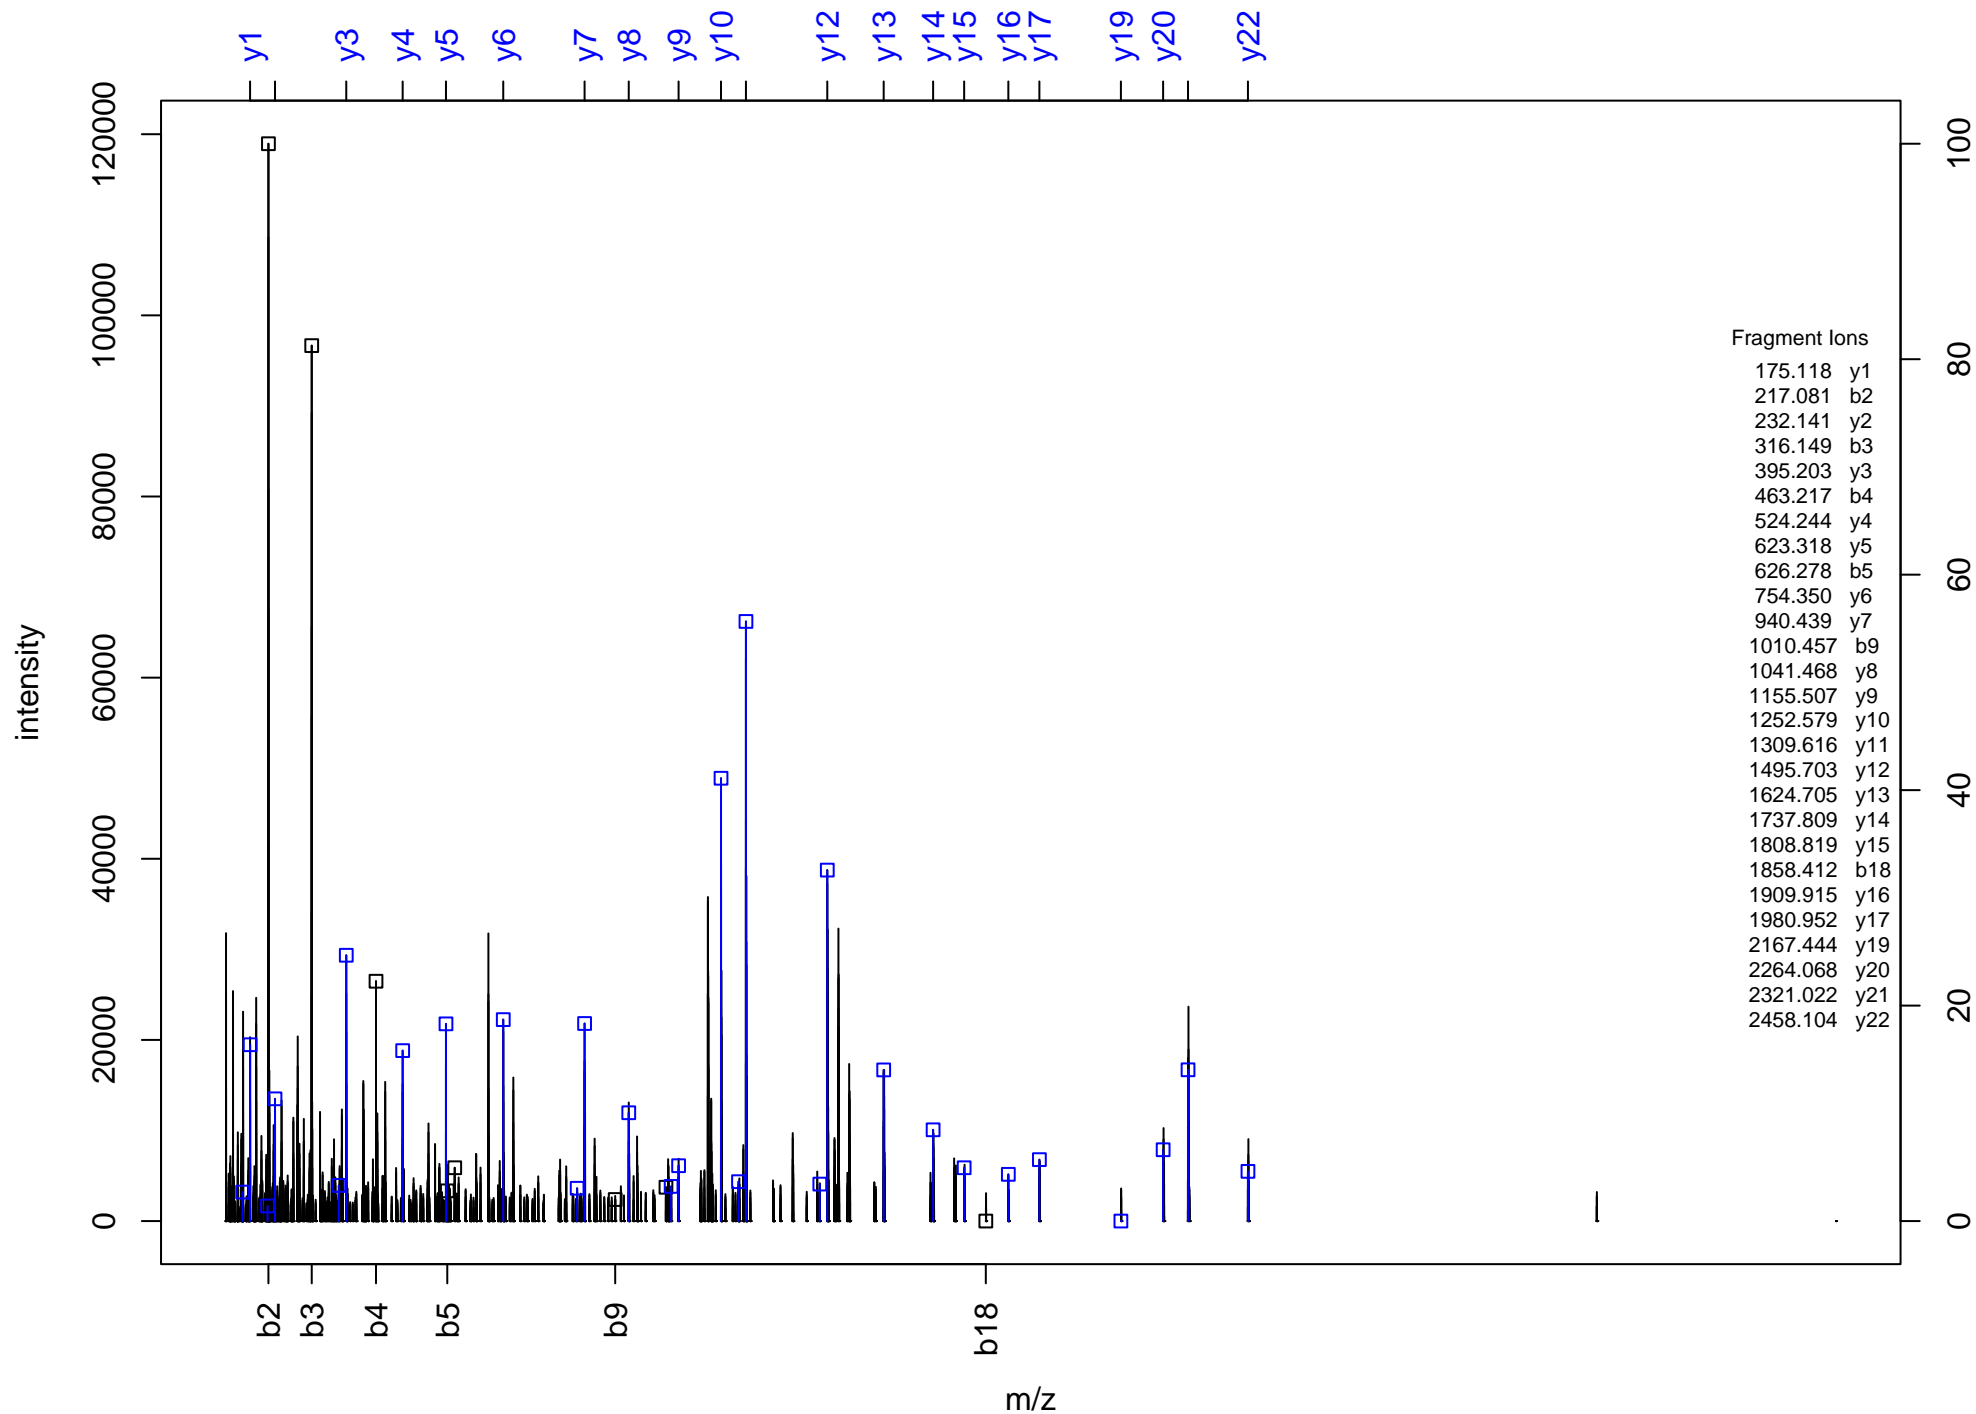



# DMEANLLPGLLR

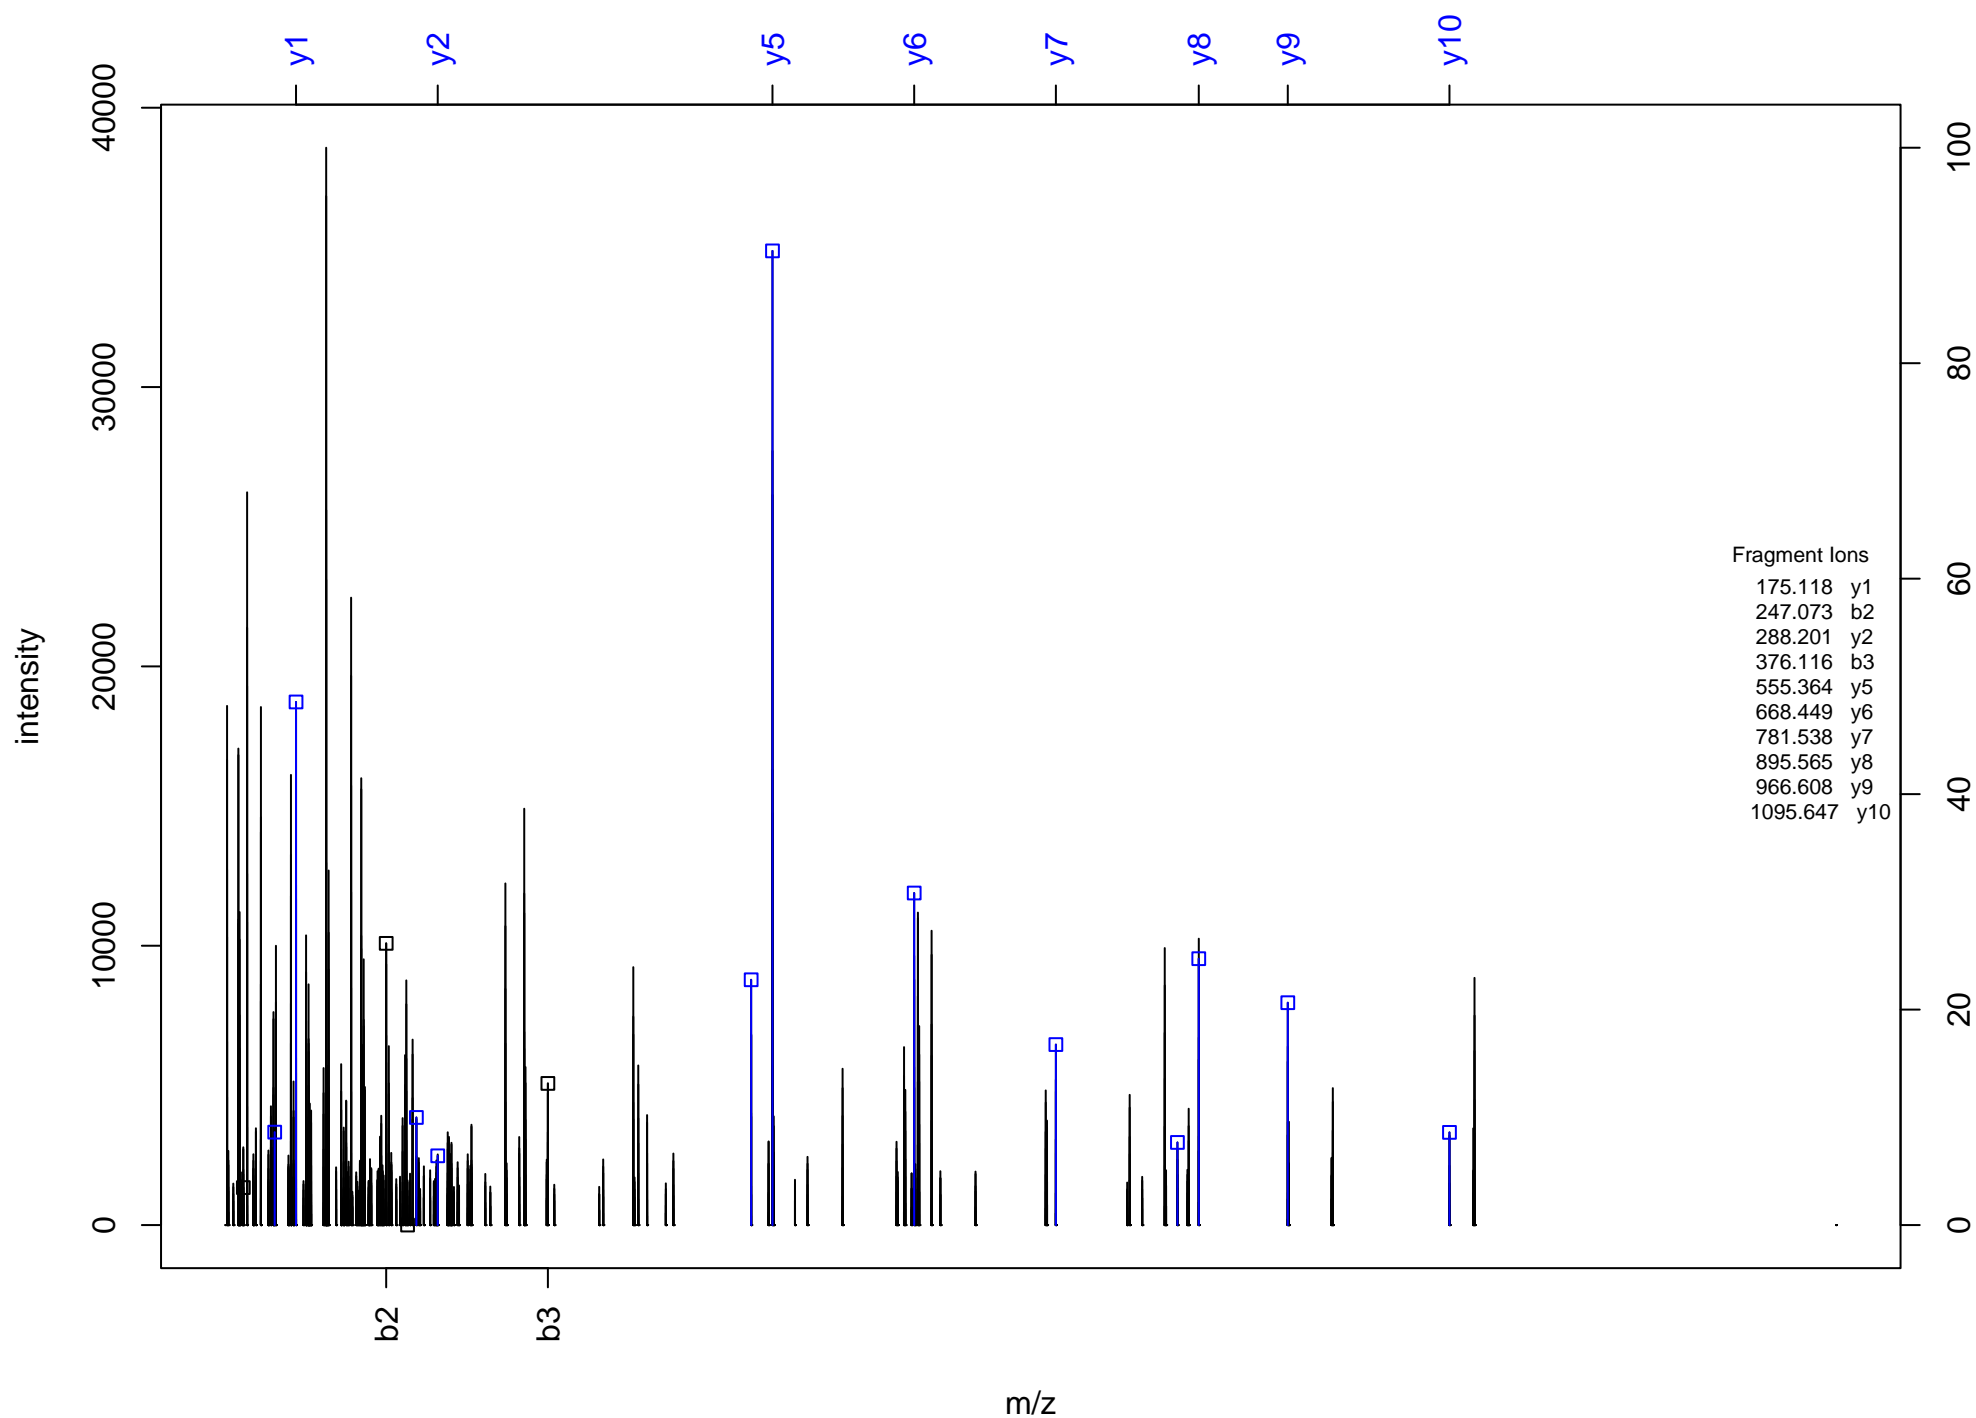

# TQSSLVPALTEFVR

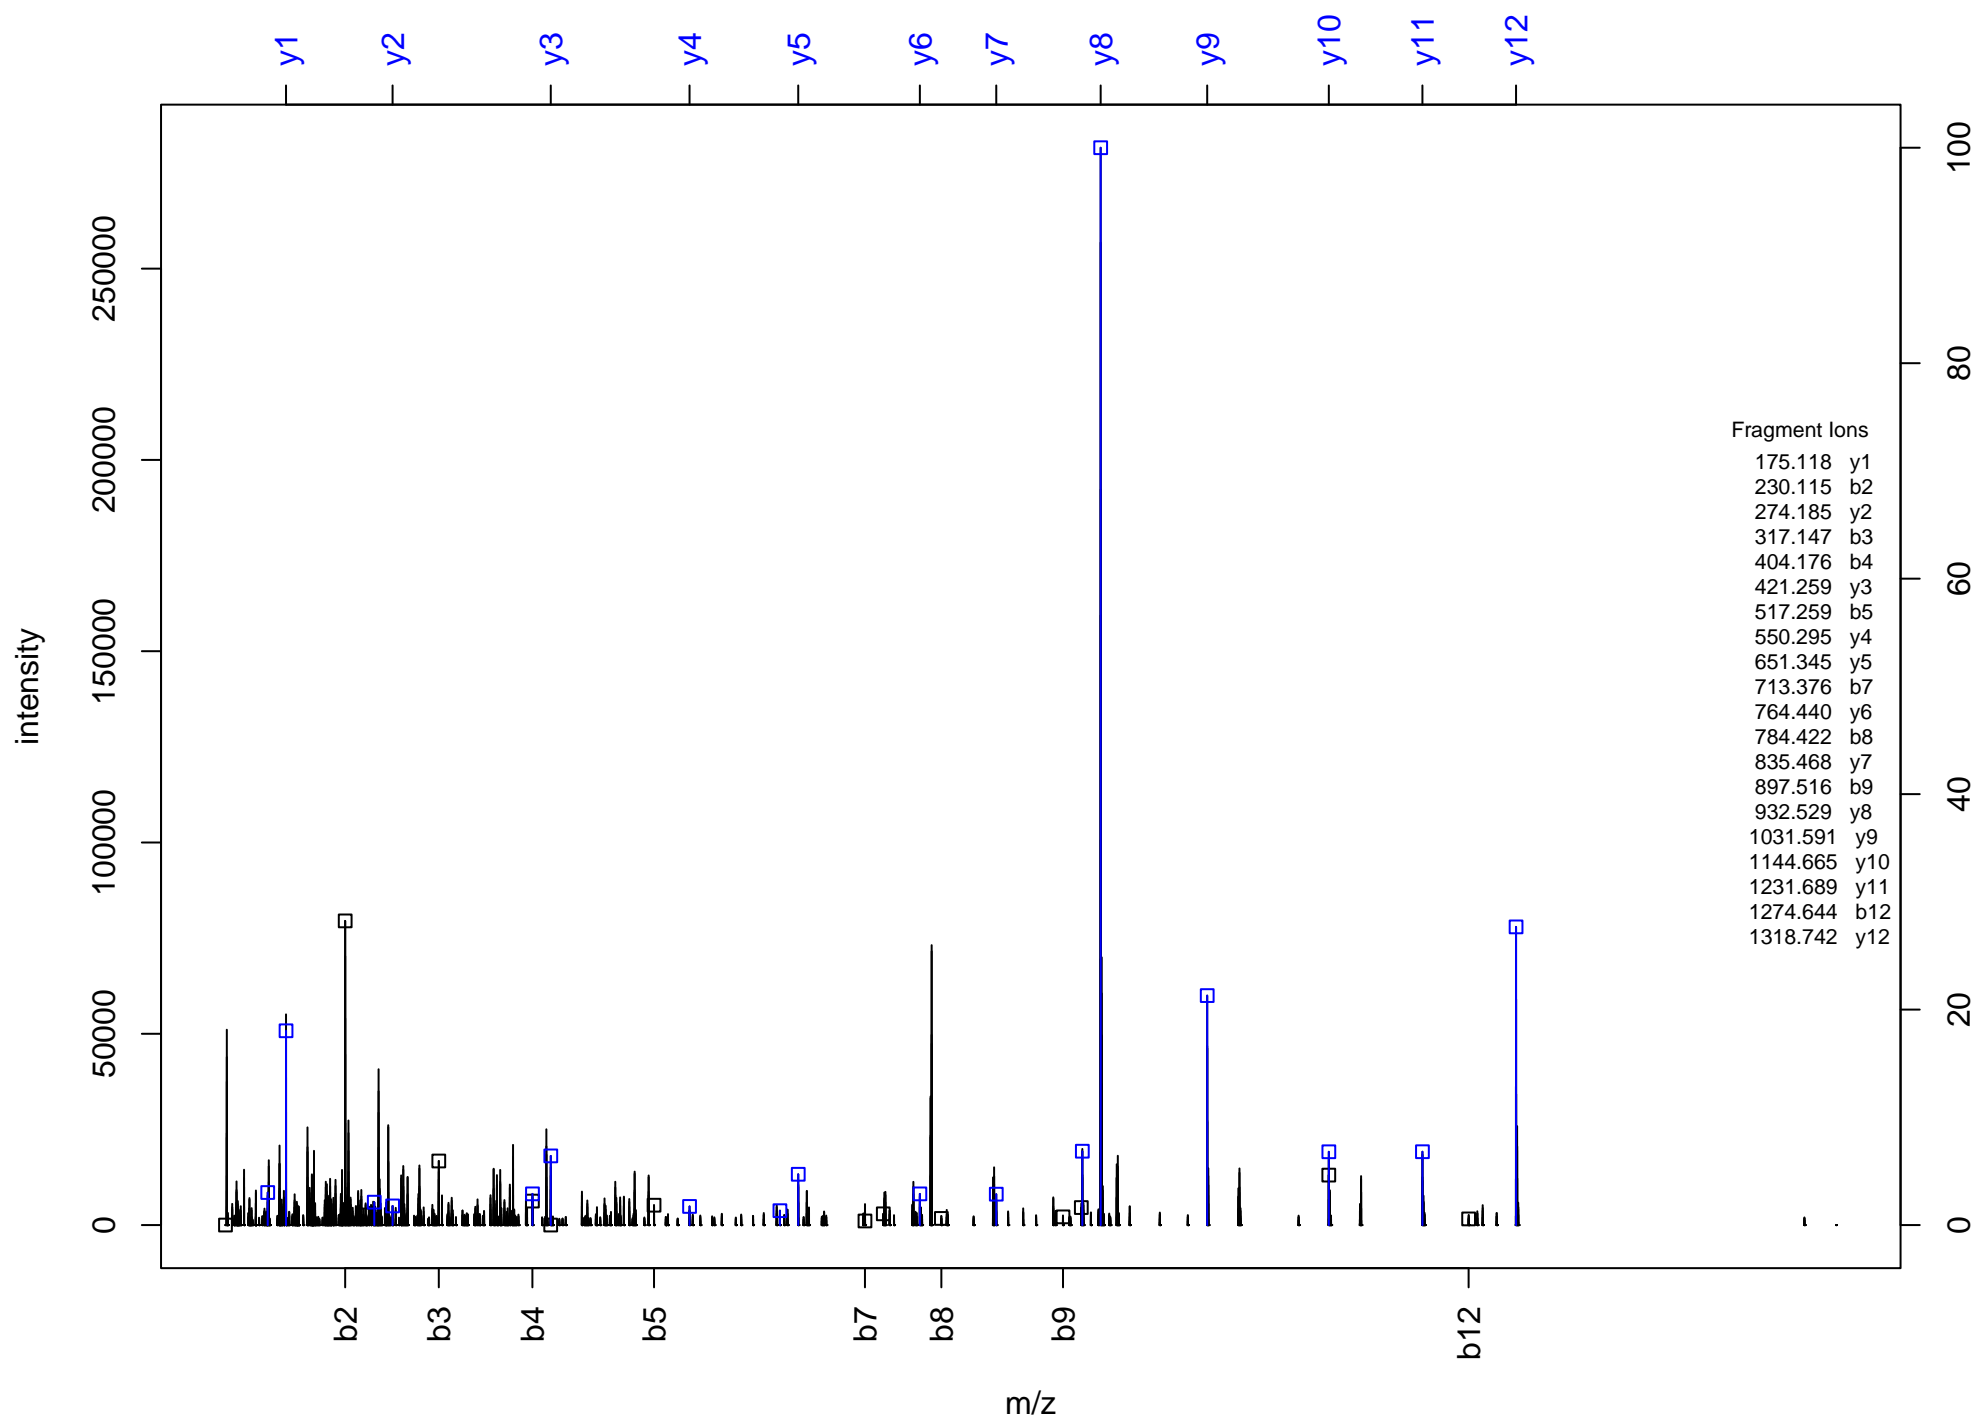

# (Ac)ALQALHSSGVGLR

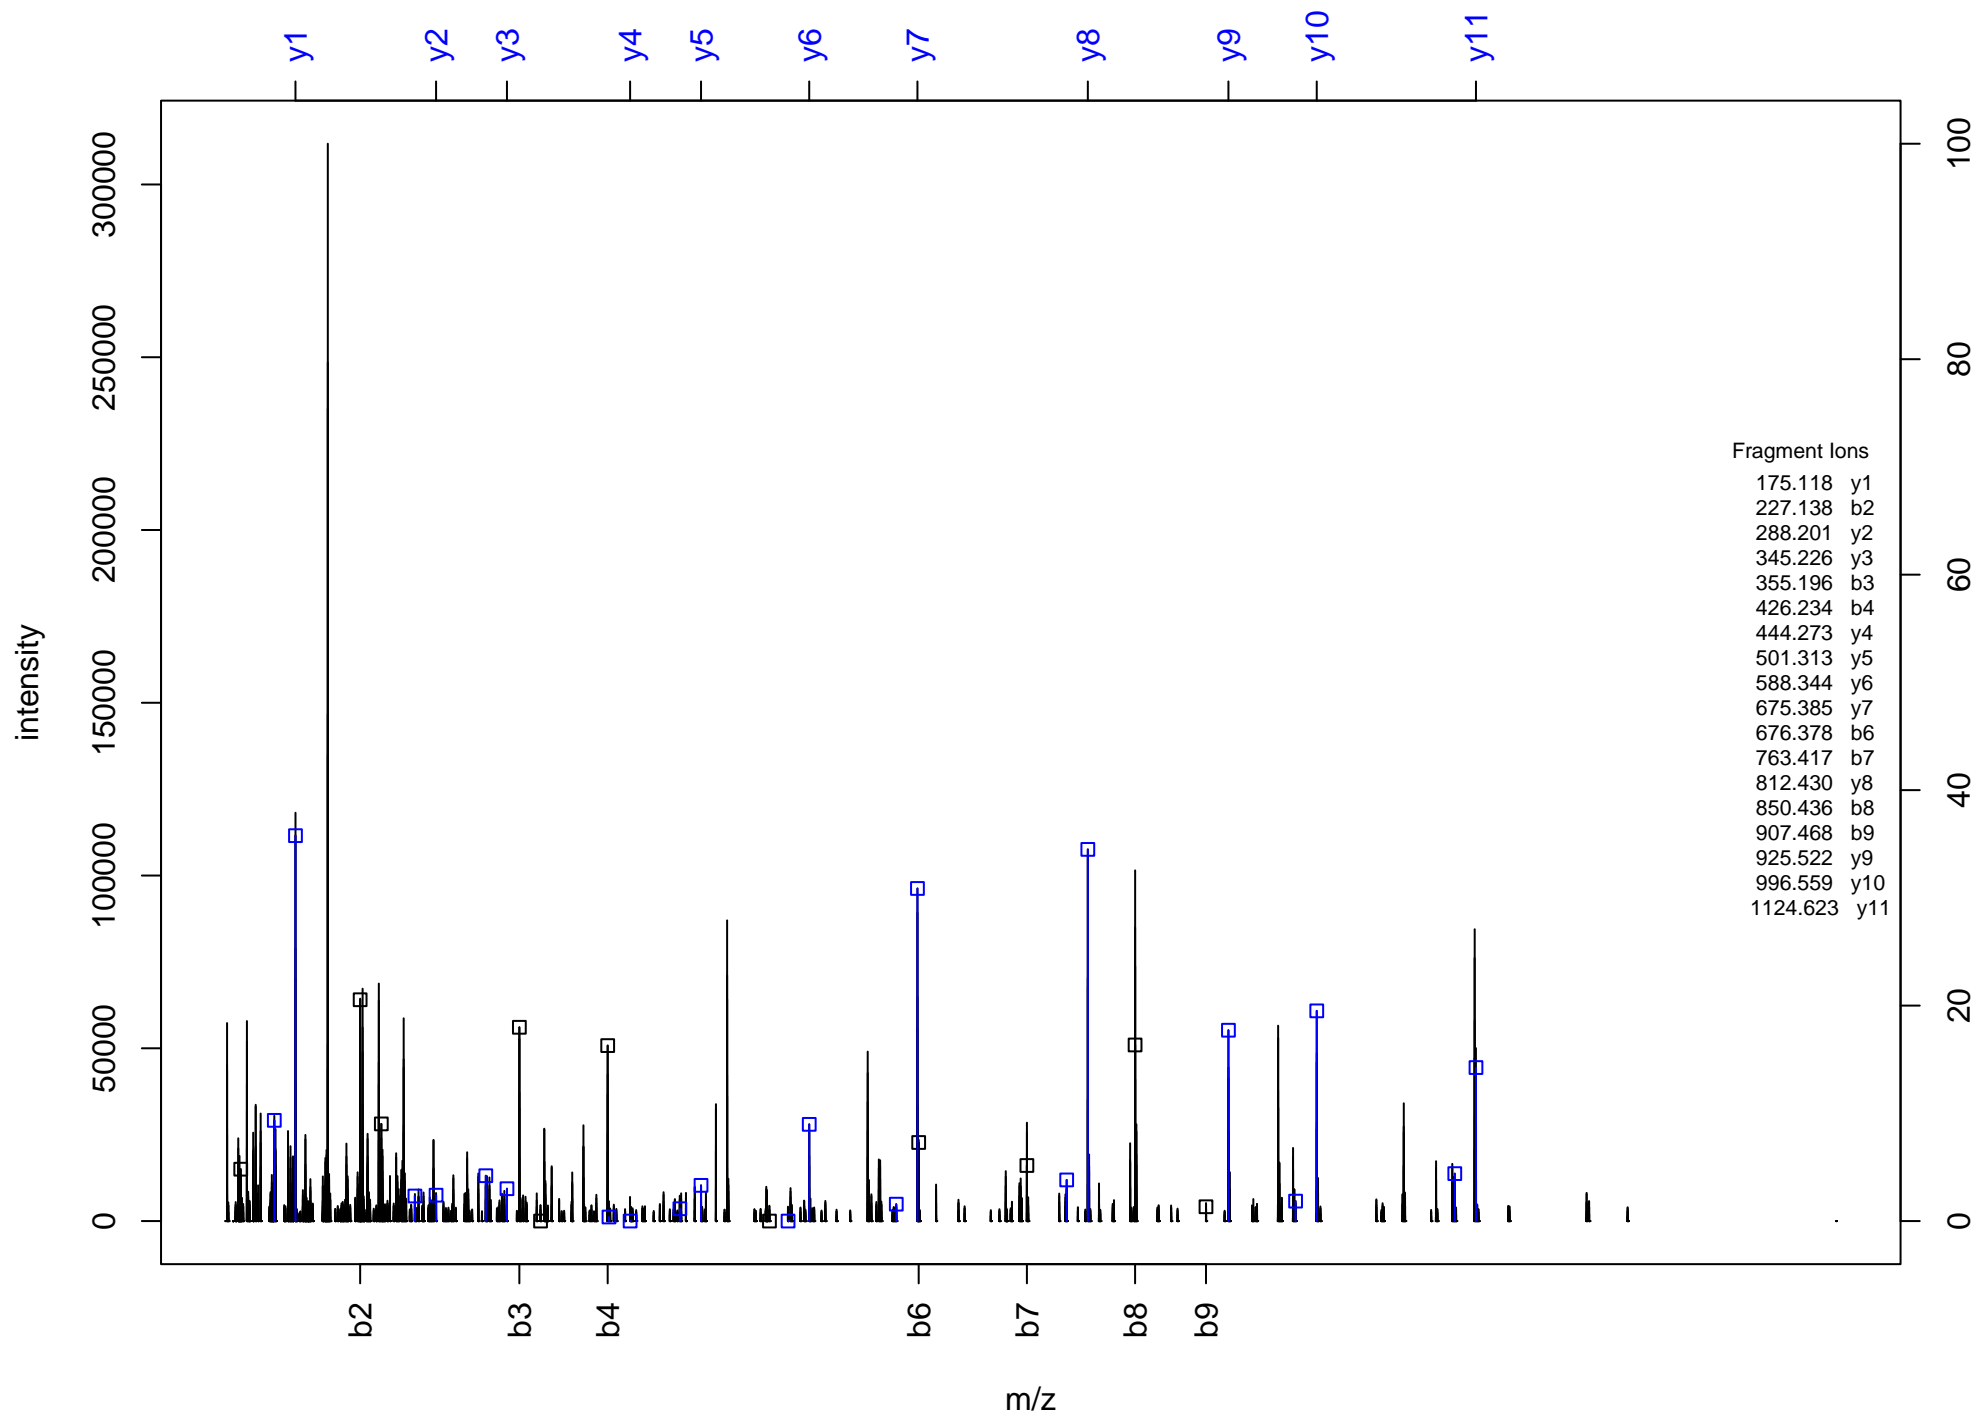

Fragment Ions

|          |     |
|----------|-----|
| 175.118  | y1  |
| 227.138  | b2  |
| 288.201  | y2  |
| 345.226  | y3  |
| 355.196  | b3  |
| 426.234  | b4  |
| 444.273  | y4  |
| 501.313  | y5  |
| 588.344  | y6  |
| 675.385  | y7  |
| 676.378  | b6  |
| 763.417  | b7  |
| 812.430  | y8  |
| 850.436  | b8  |
| 907.468  | b9  |
| 925.522  | y9  |
| 996.559  | y10 |
| 1124.623 | y11 |

# VEDSCVEWDPTGGK

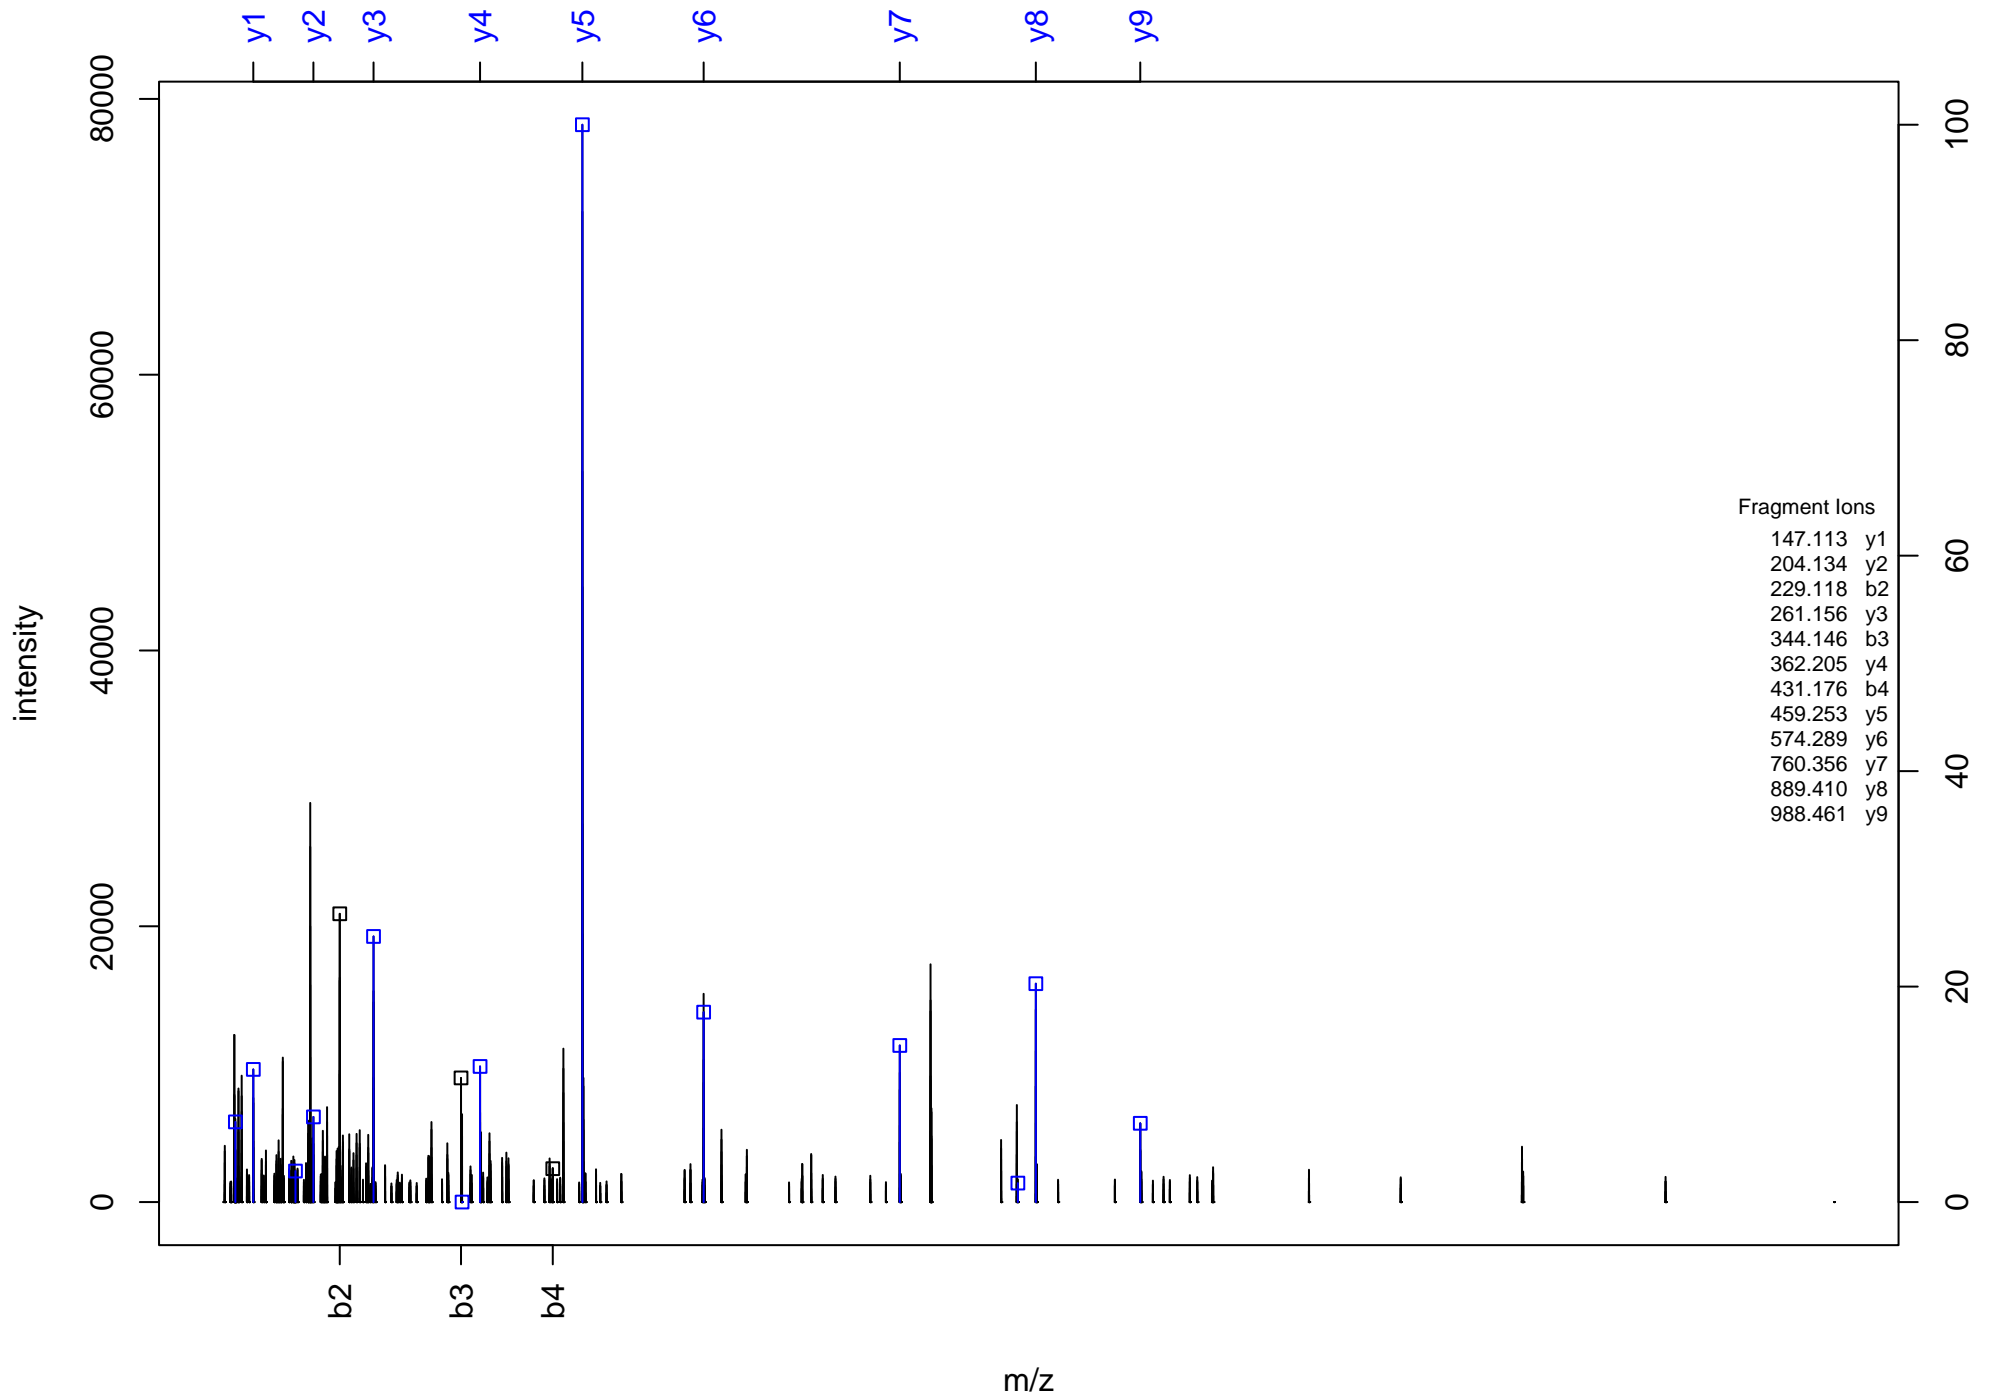

# N<sup>^</sup>LENEIYVNDQK

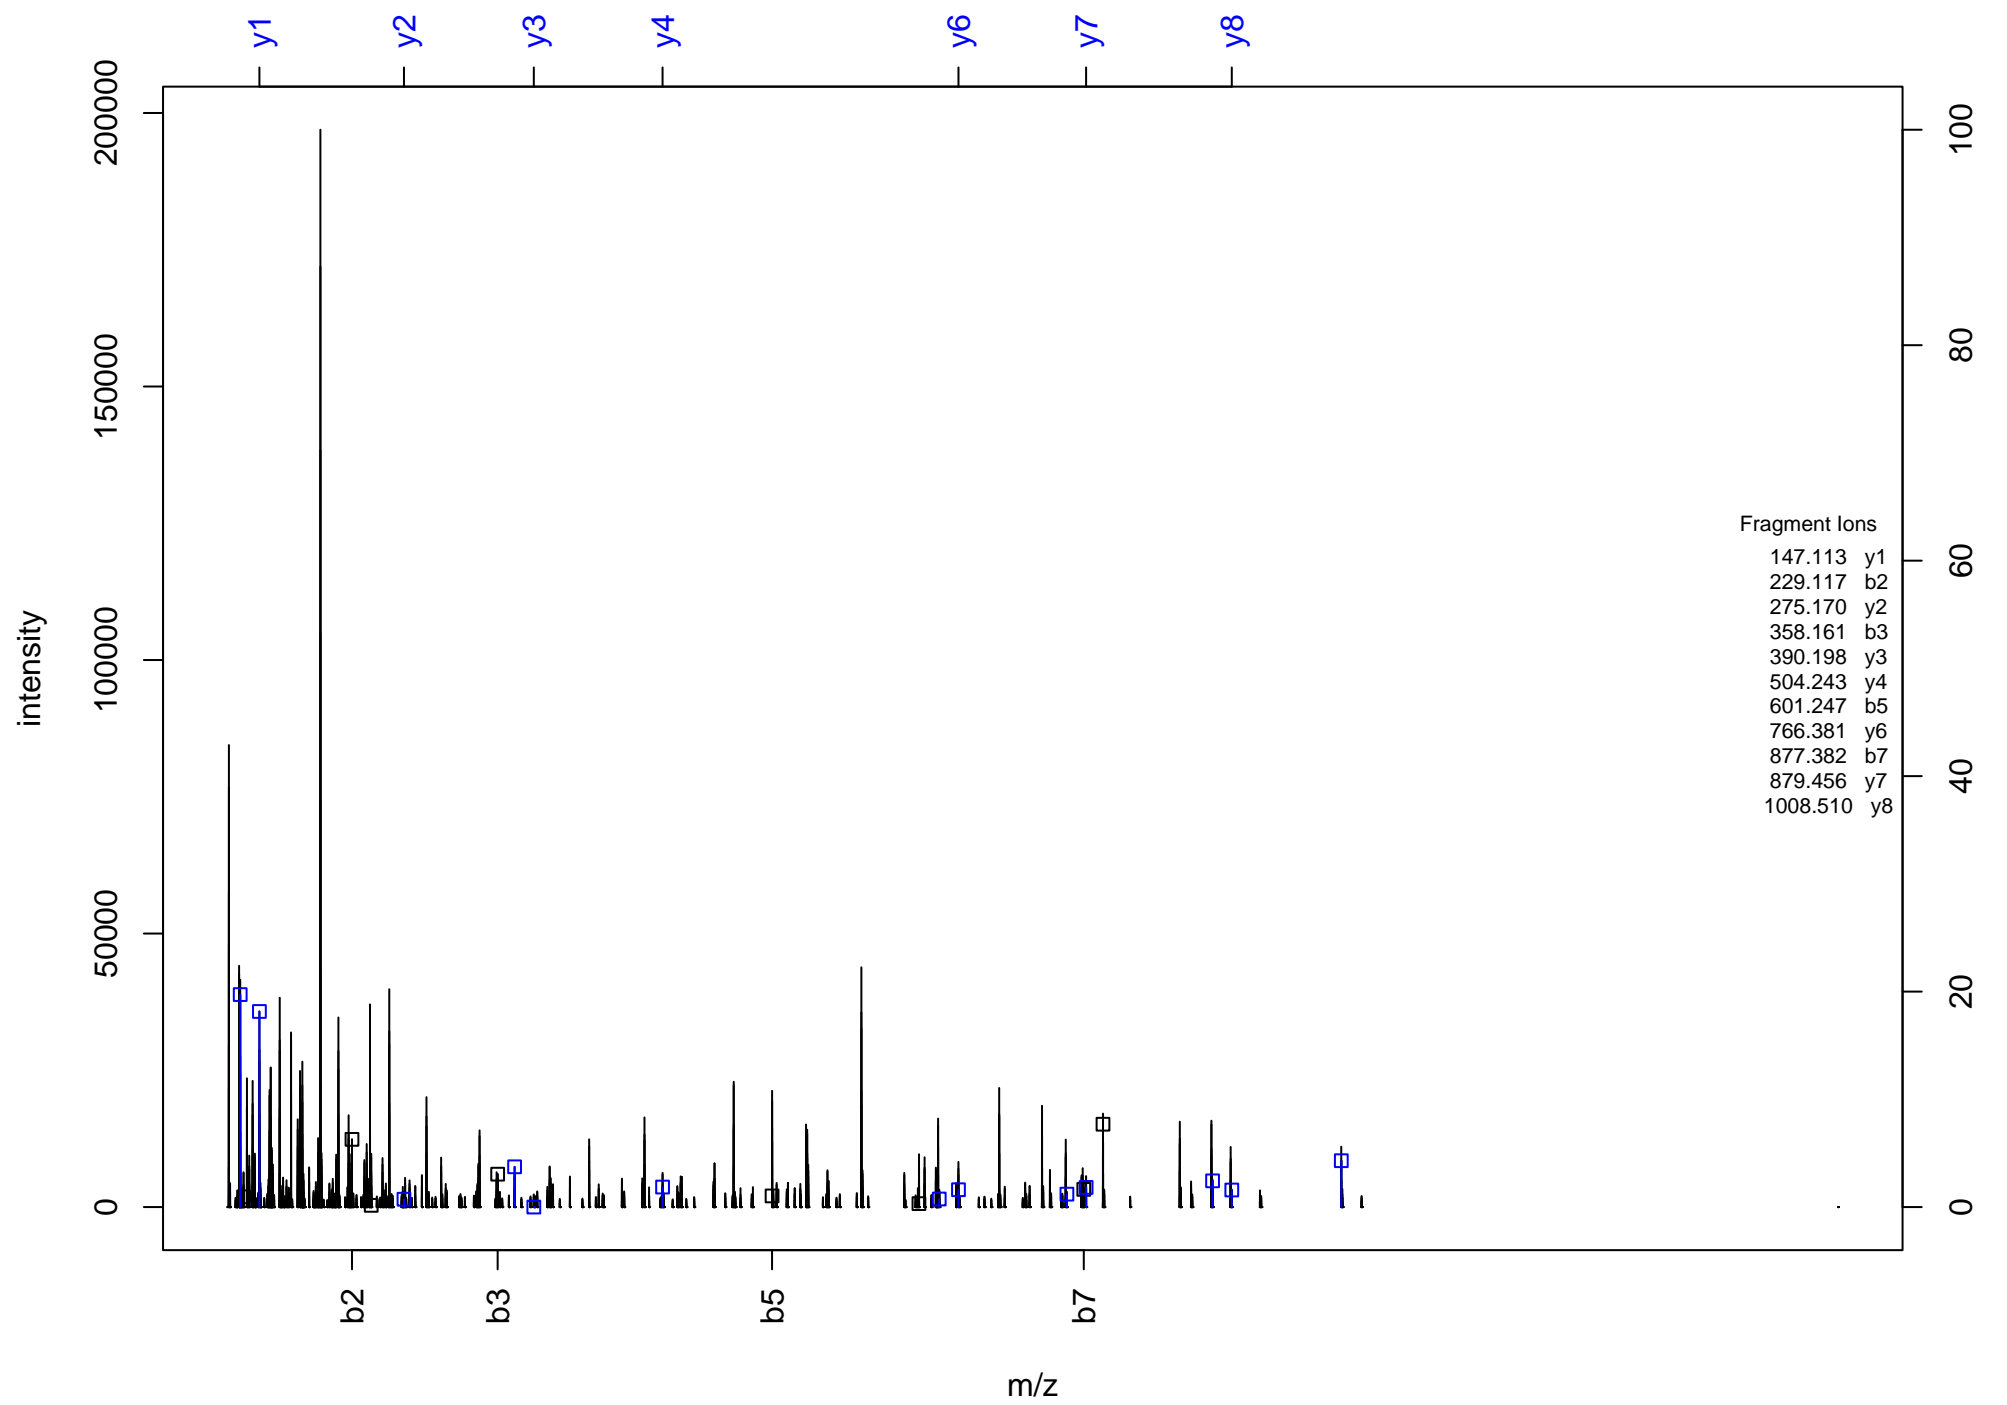

# ELTVDNSFEFEK

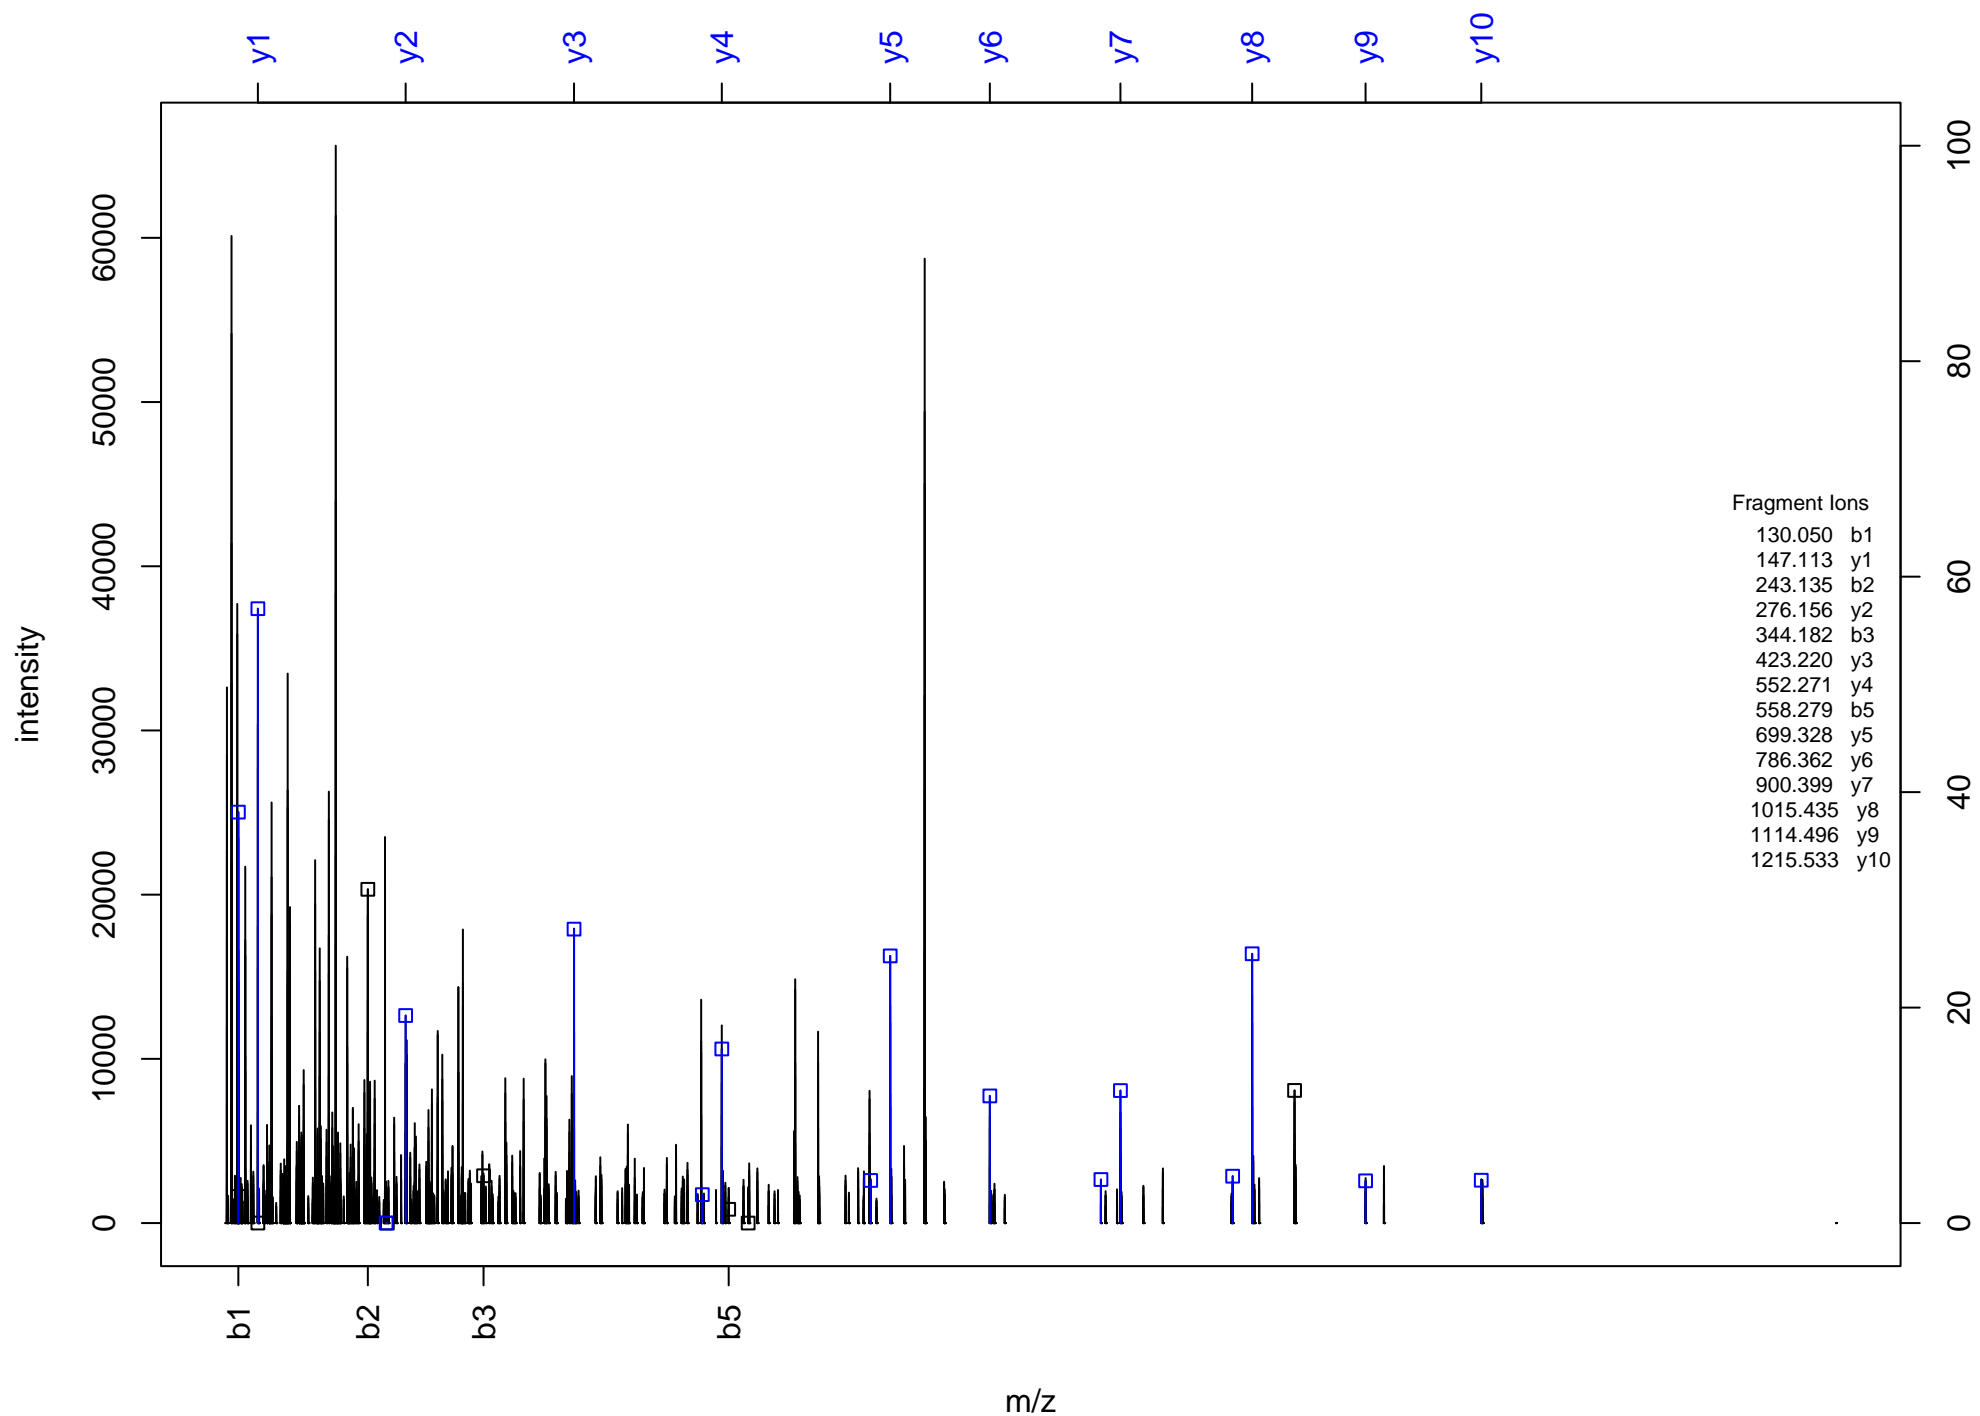

# LGLVGWVQNTDR

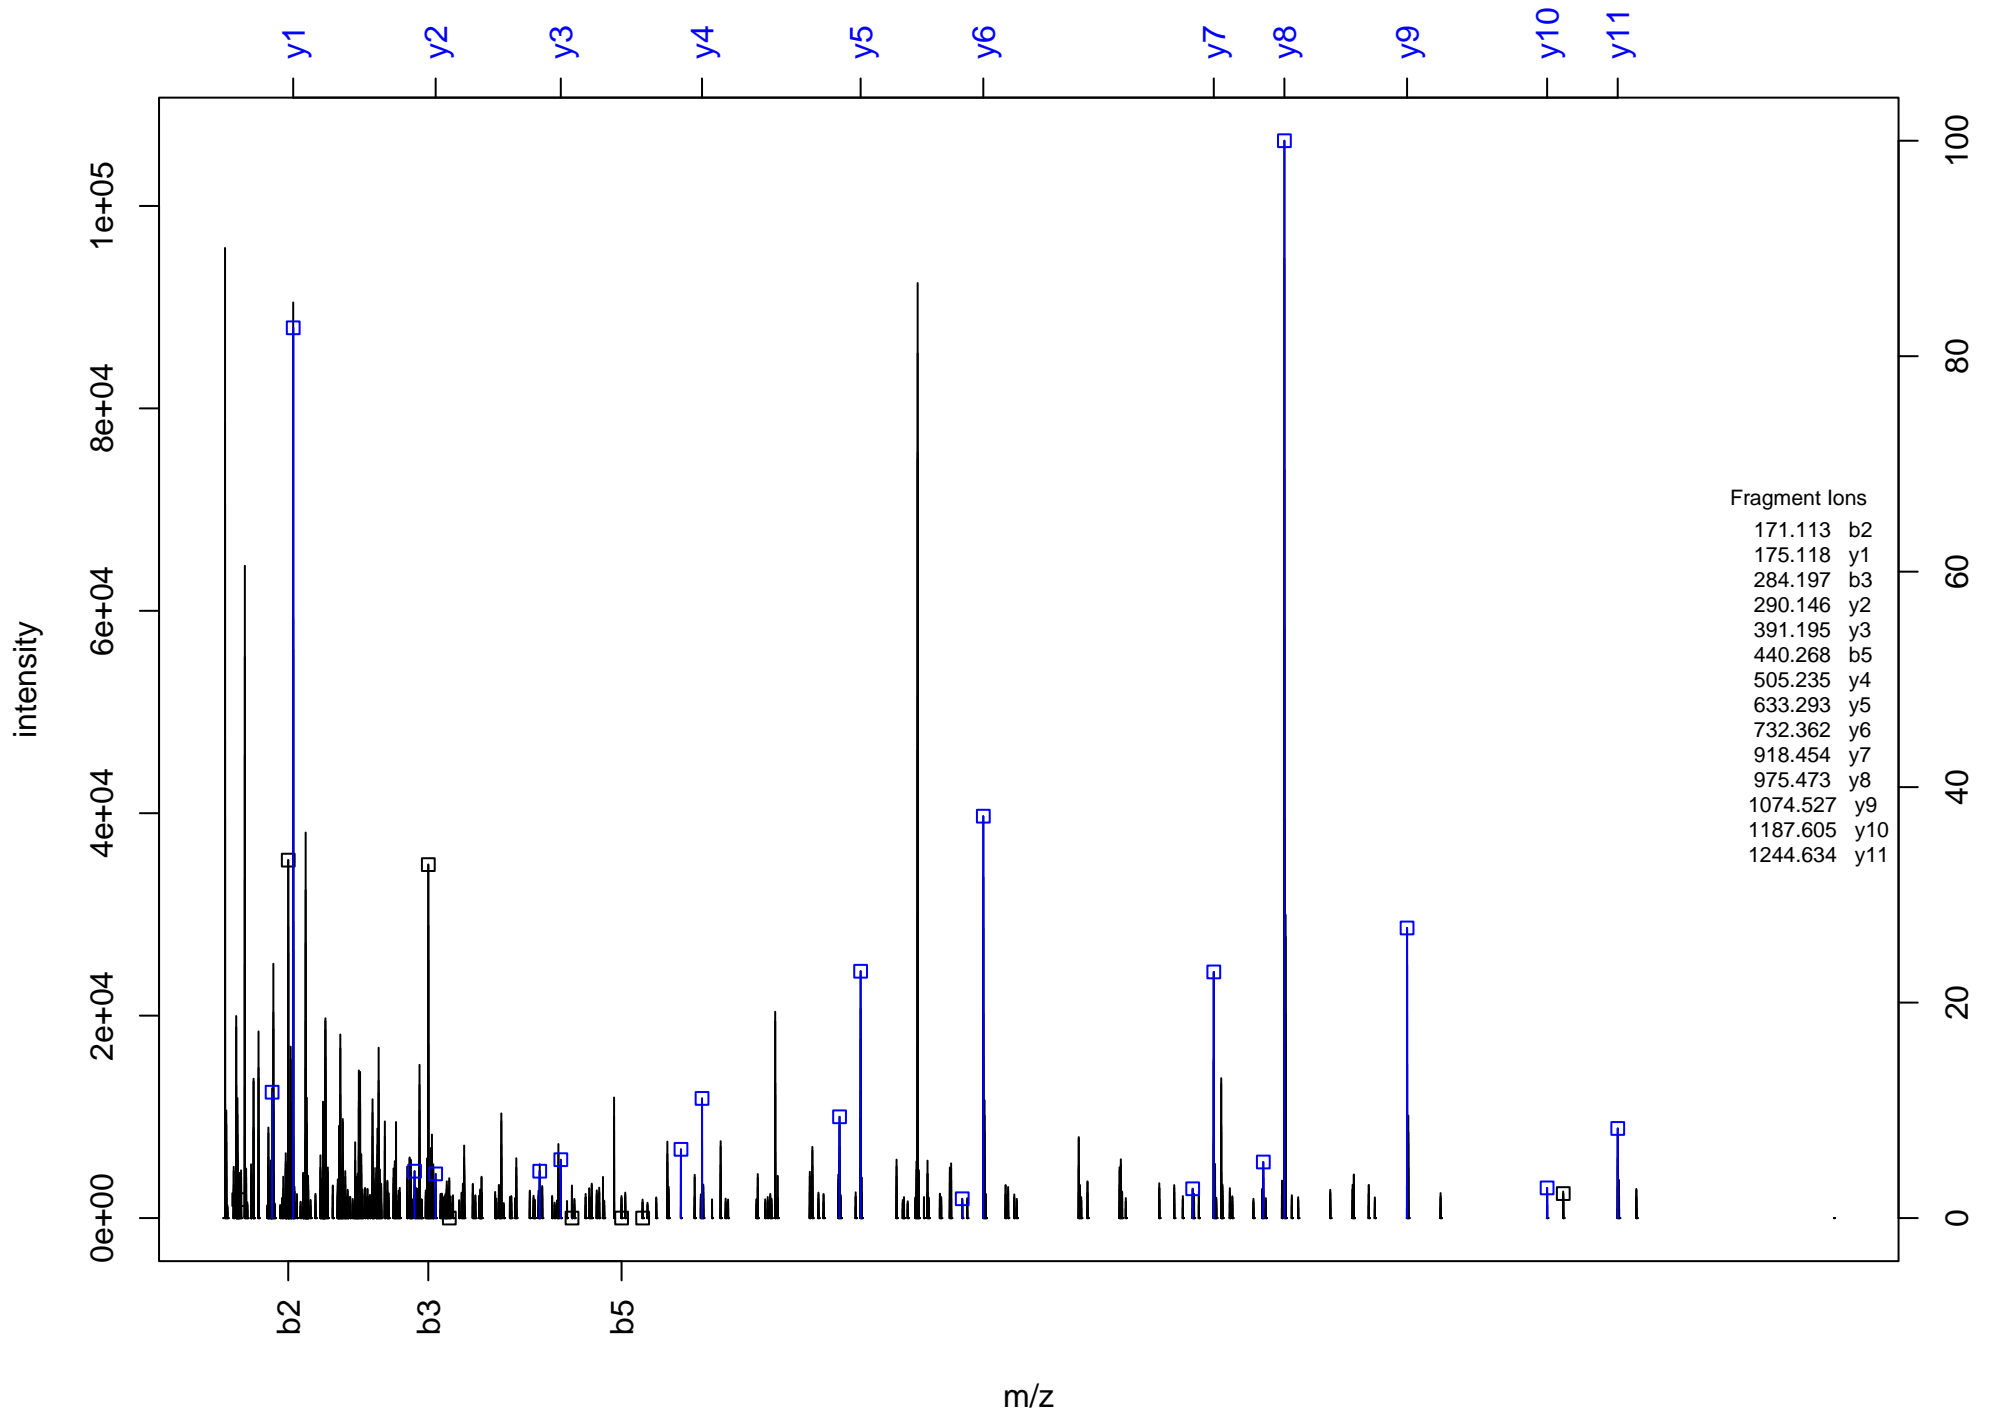

# YTDQSGEEEEEDYESEEQLQHR

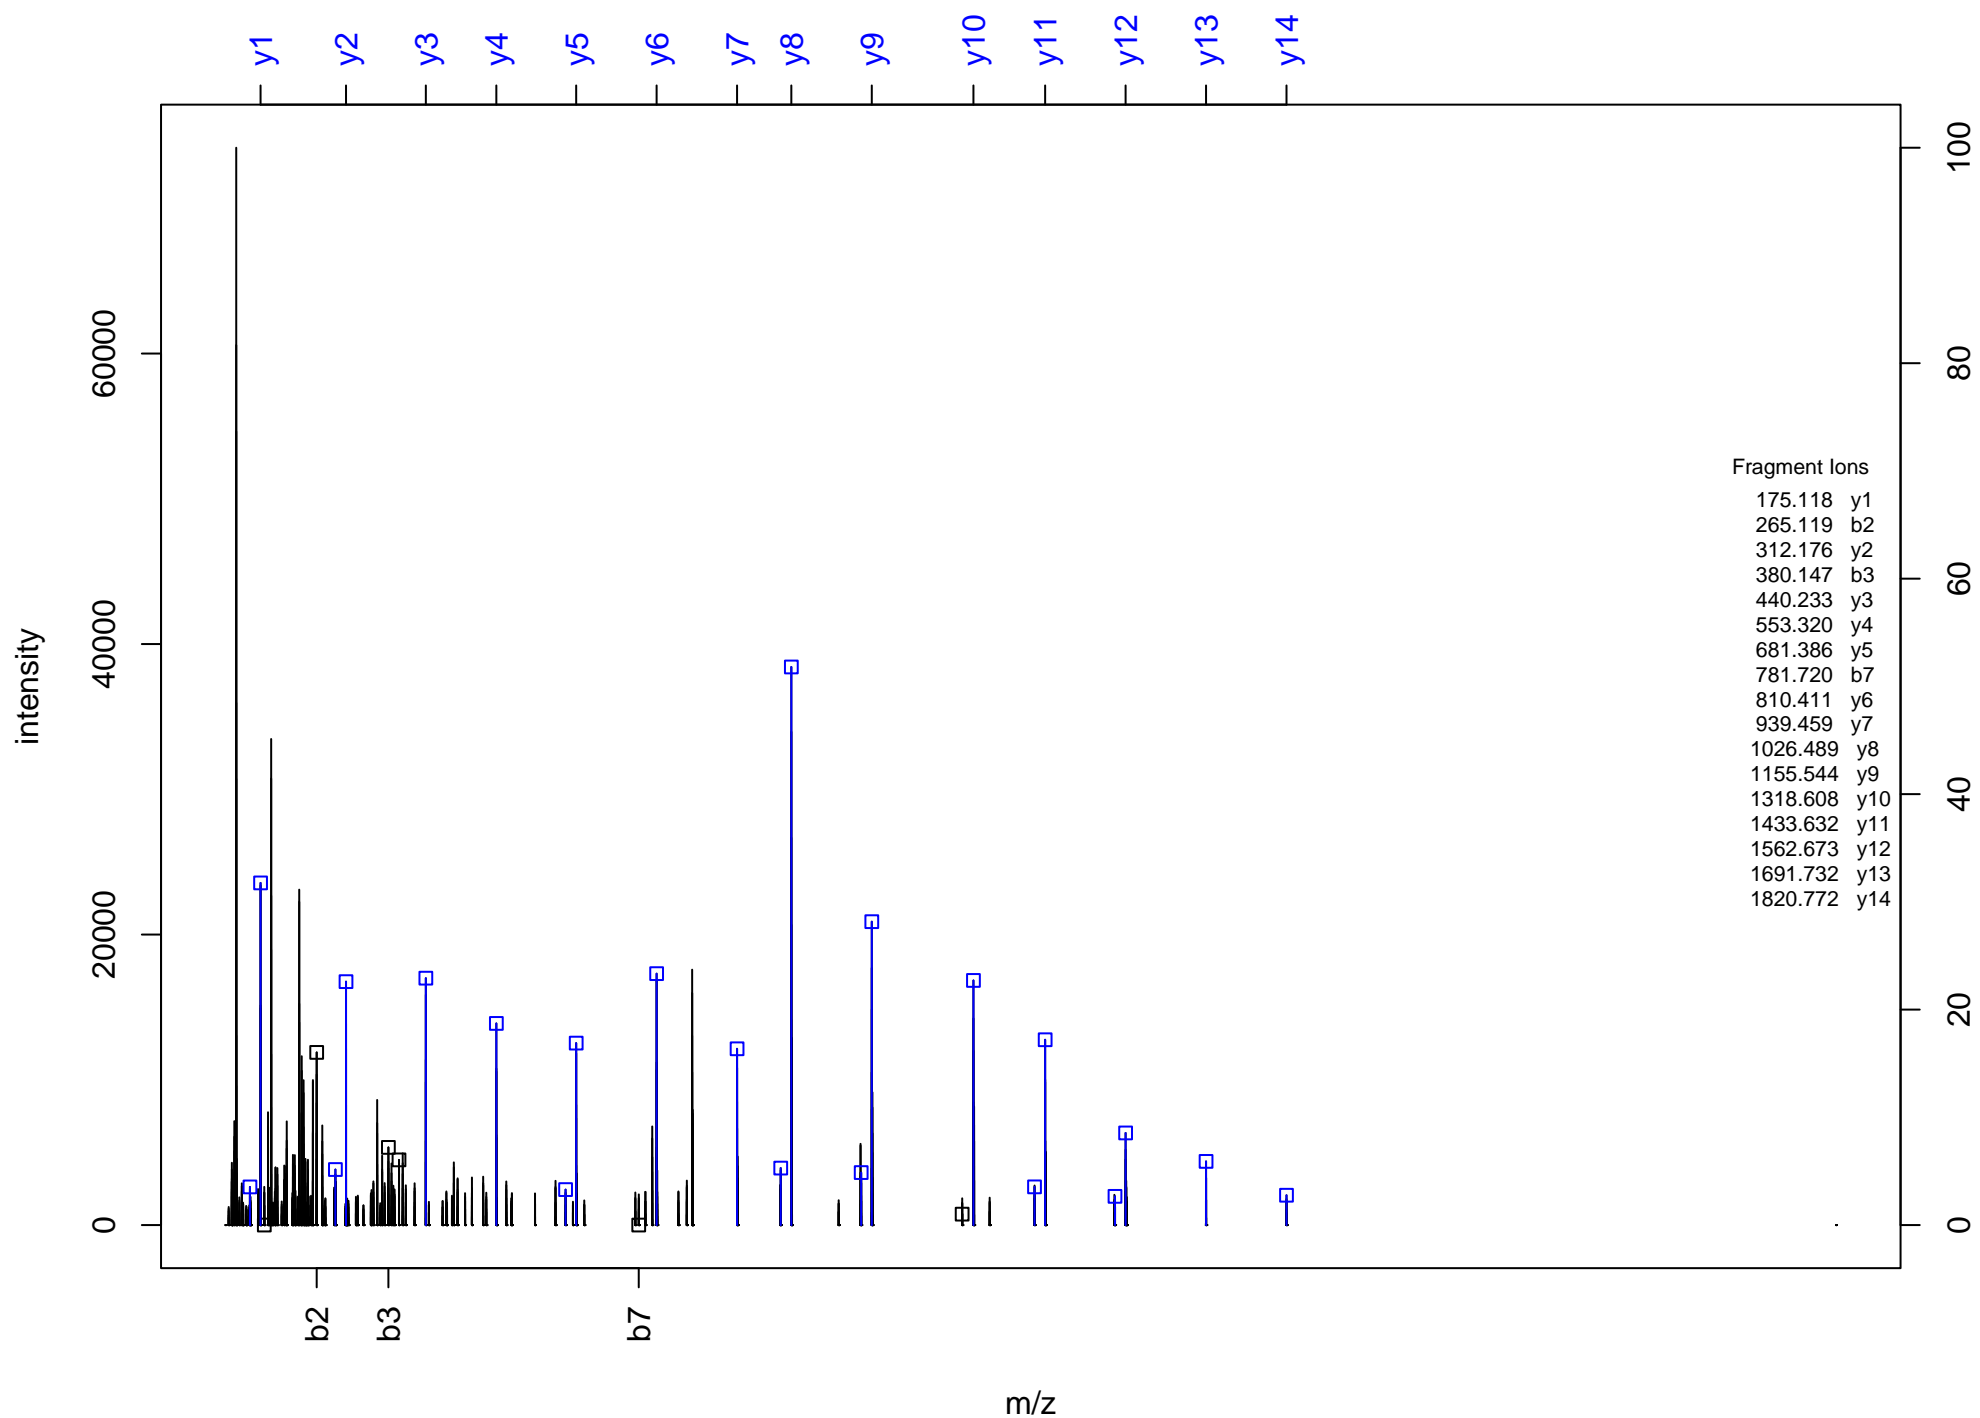



# TQSEESRPQSLQQPATSTTETPASPAHTTPQTQNTSGR

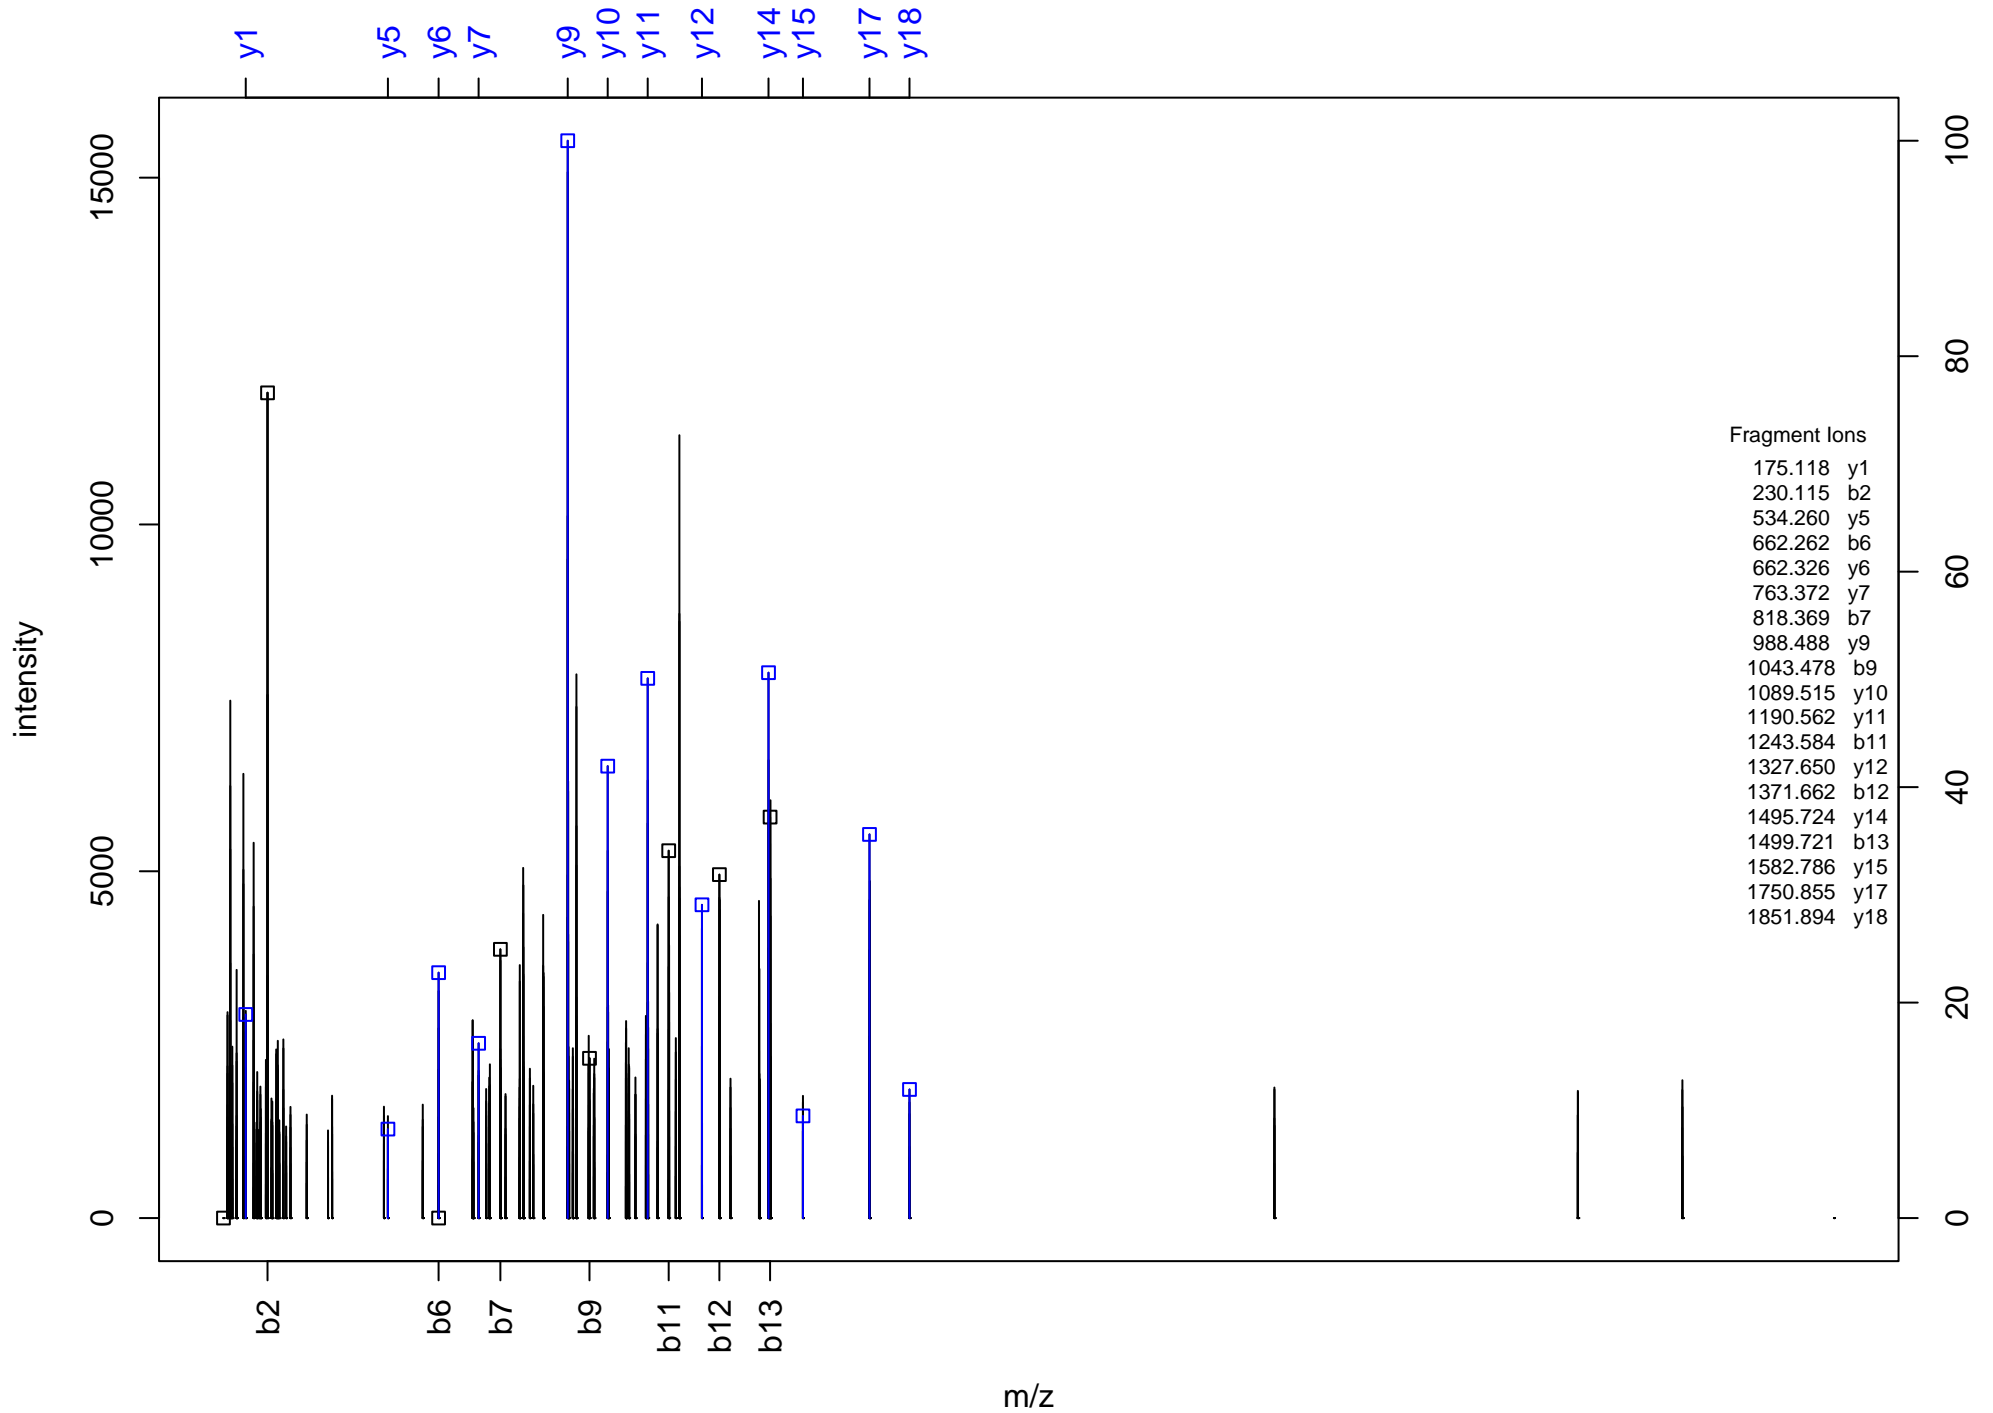

# QTFLQDCEDDGETAAGGR

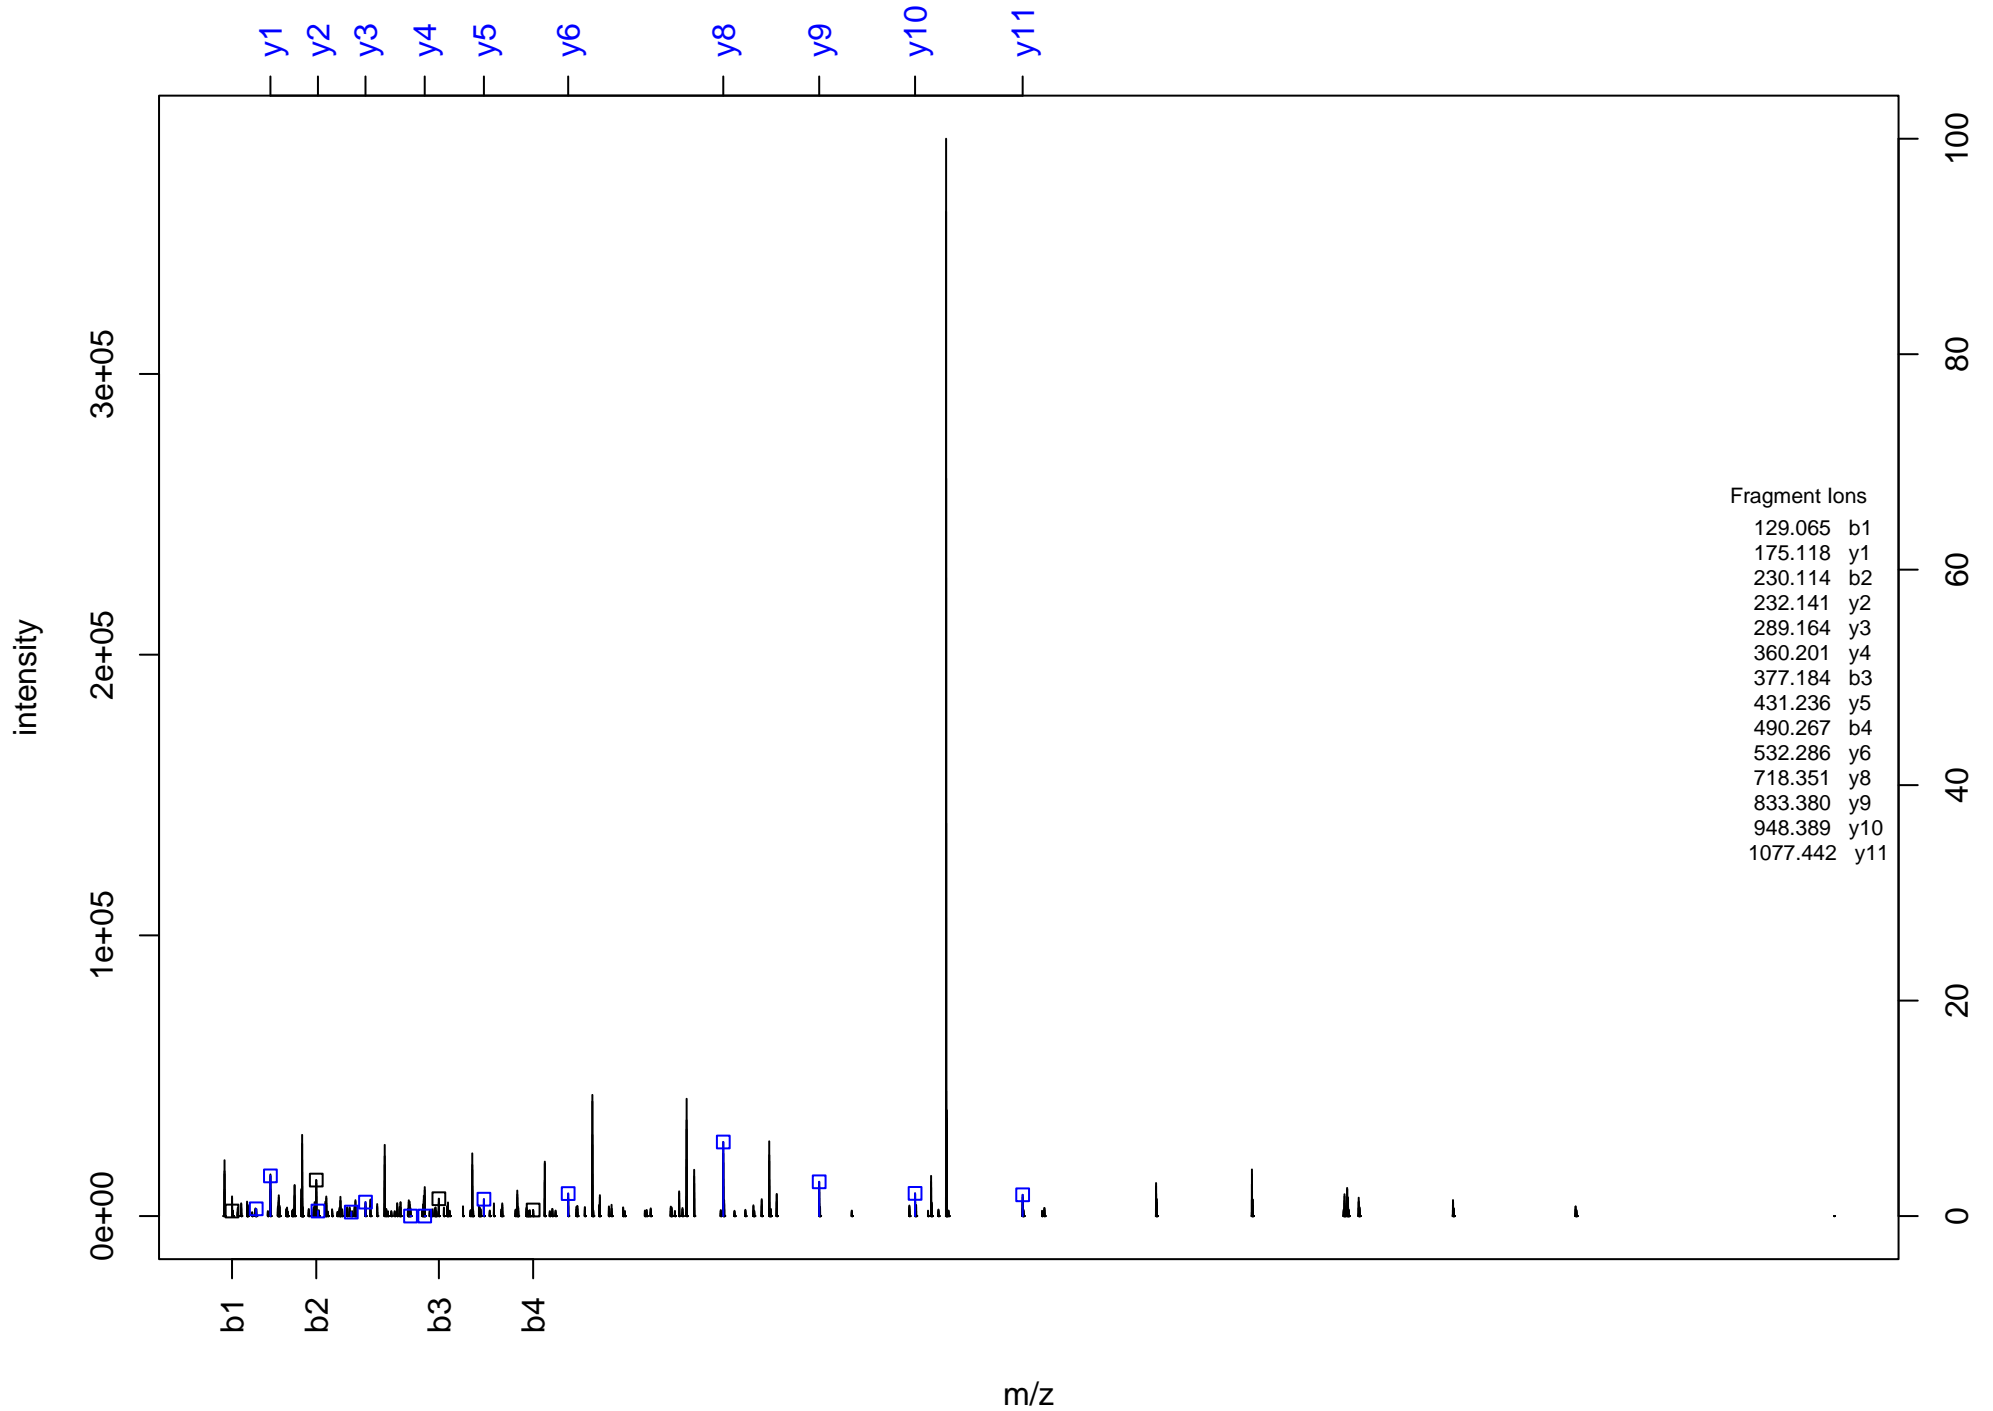

# TEENVSDGSPNAGTVEQTPK

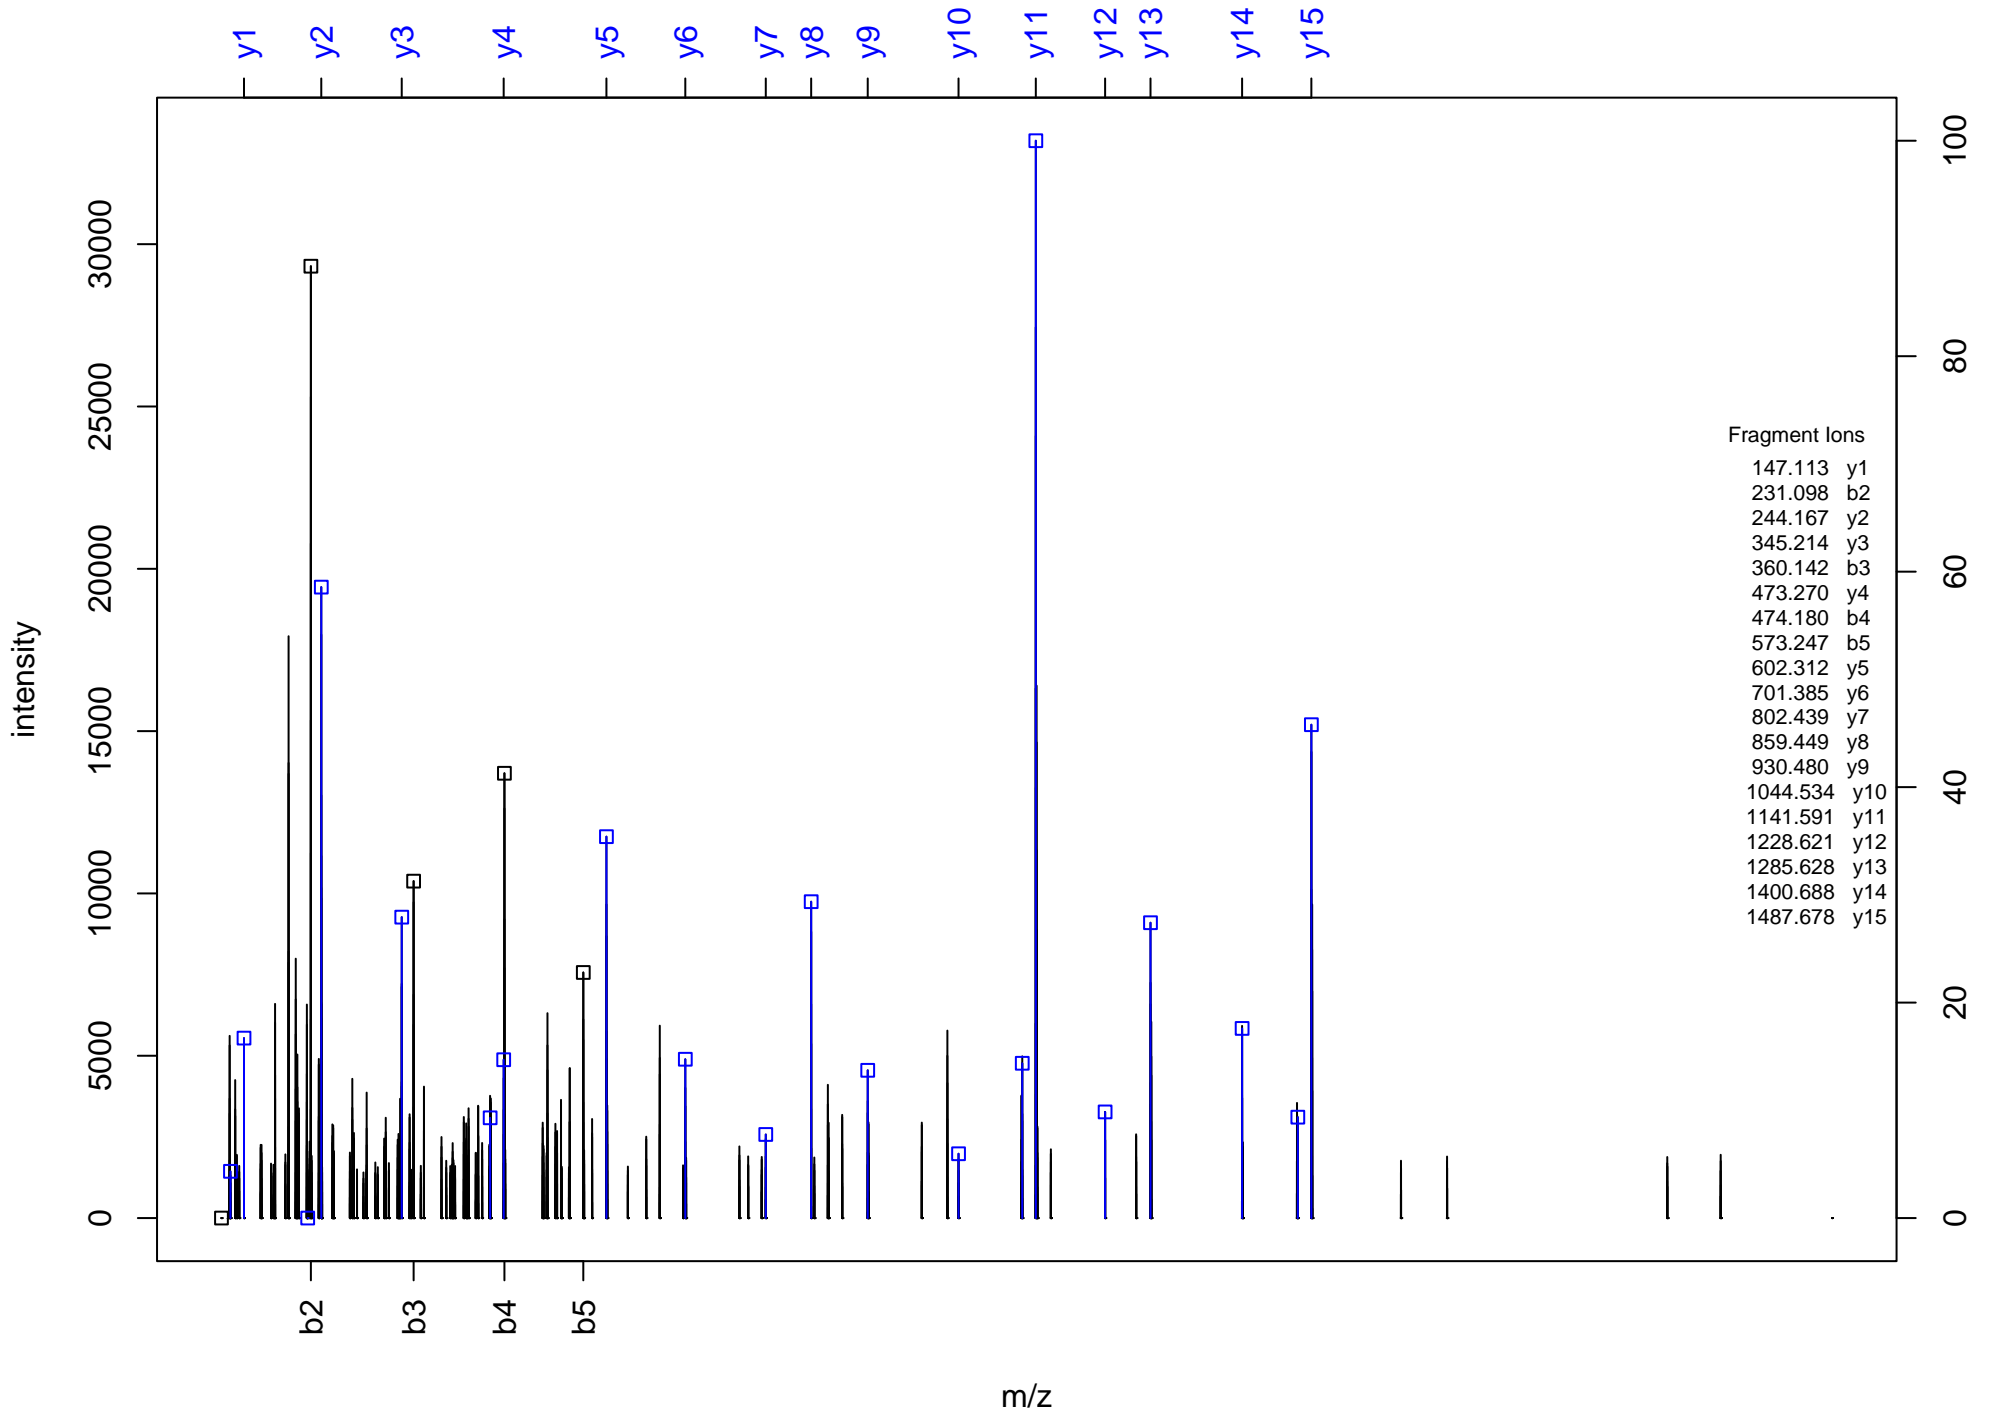

# LILYNDGDSLQYIER

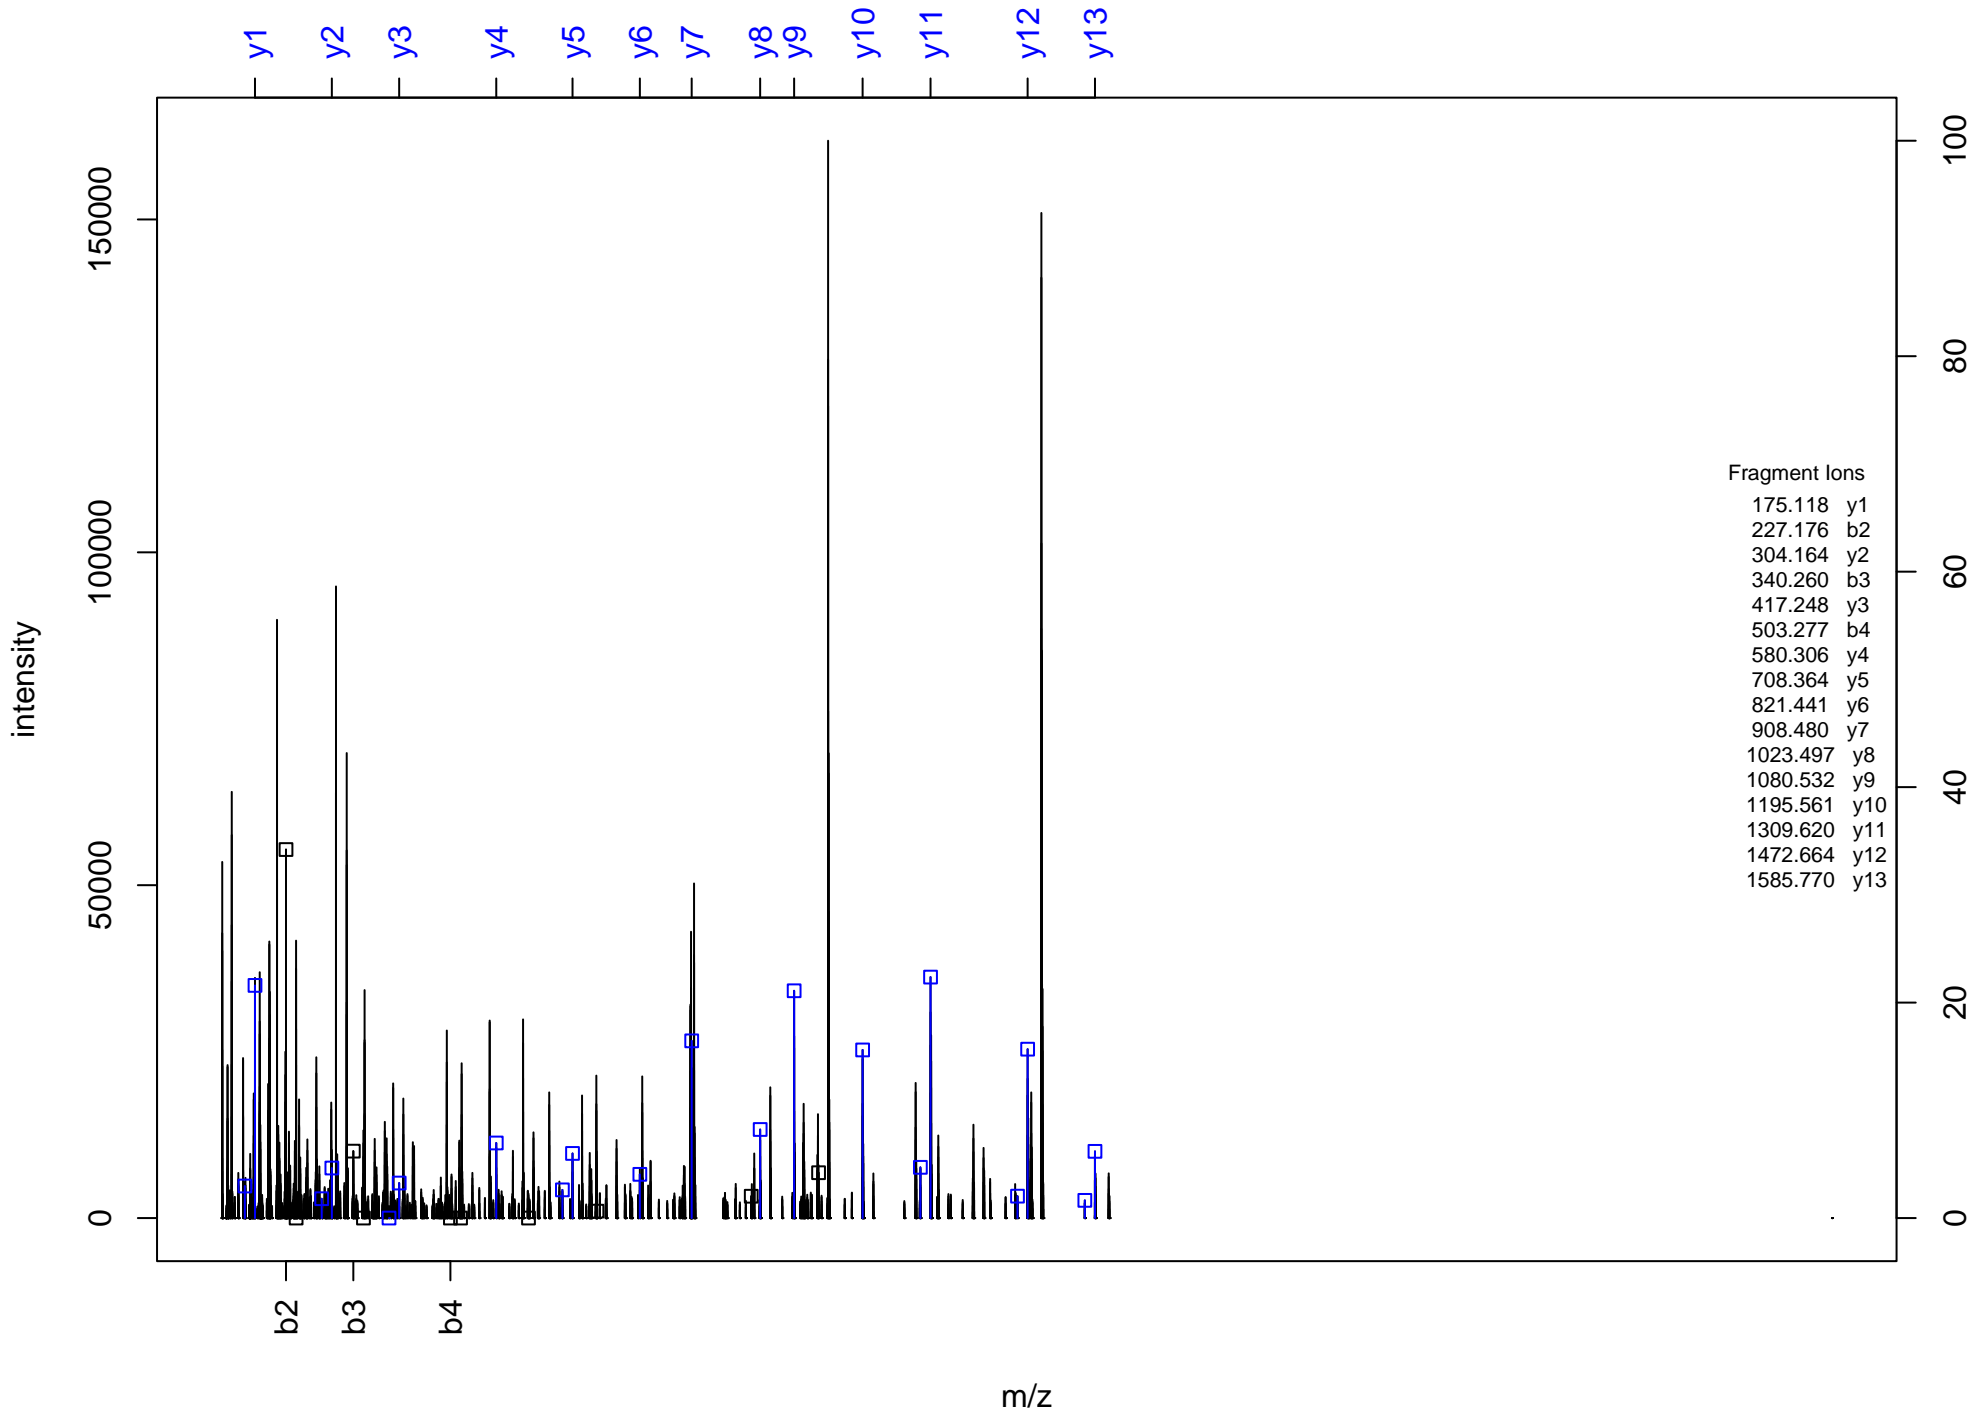

# (Ac)MEVLATDTASQQER

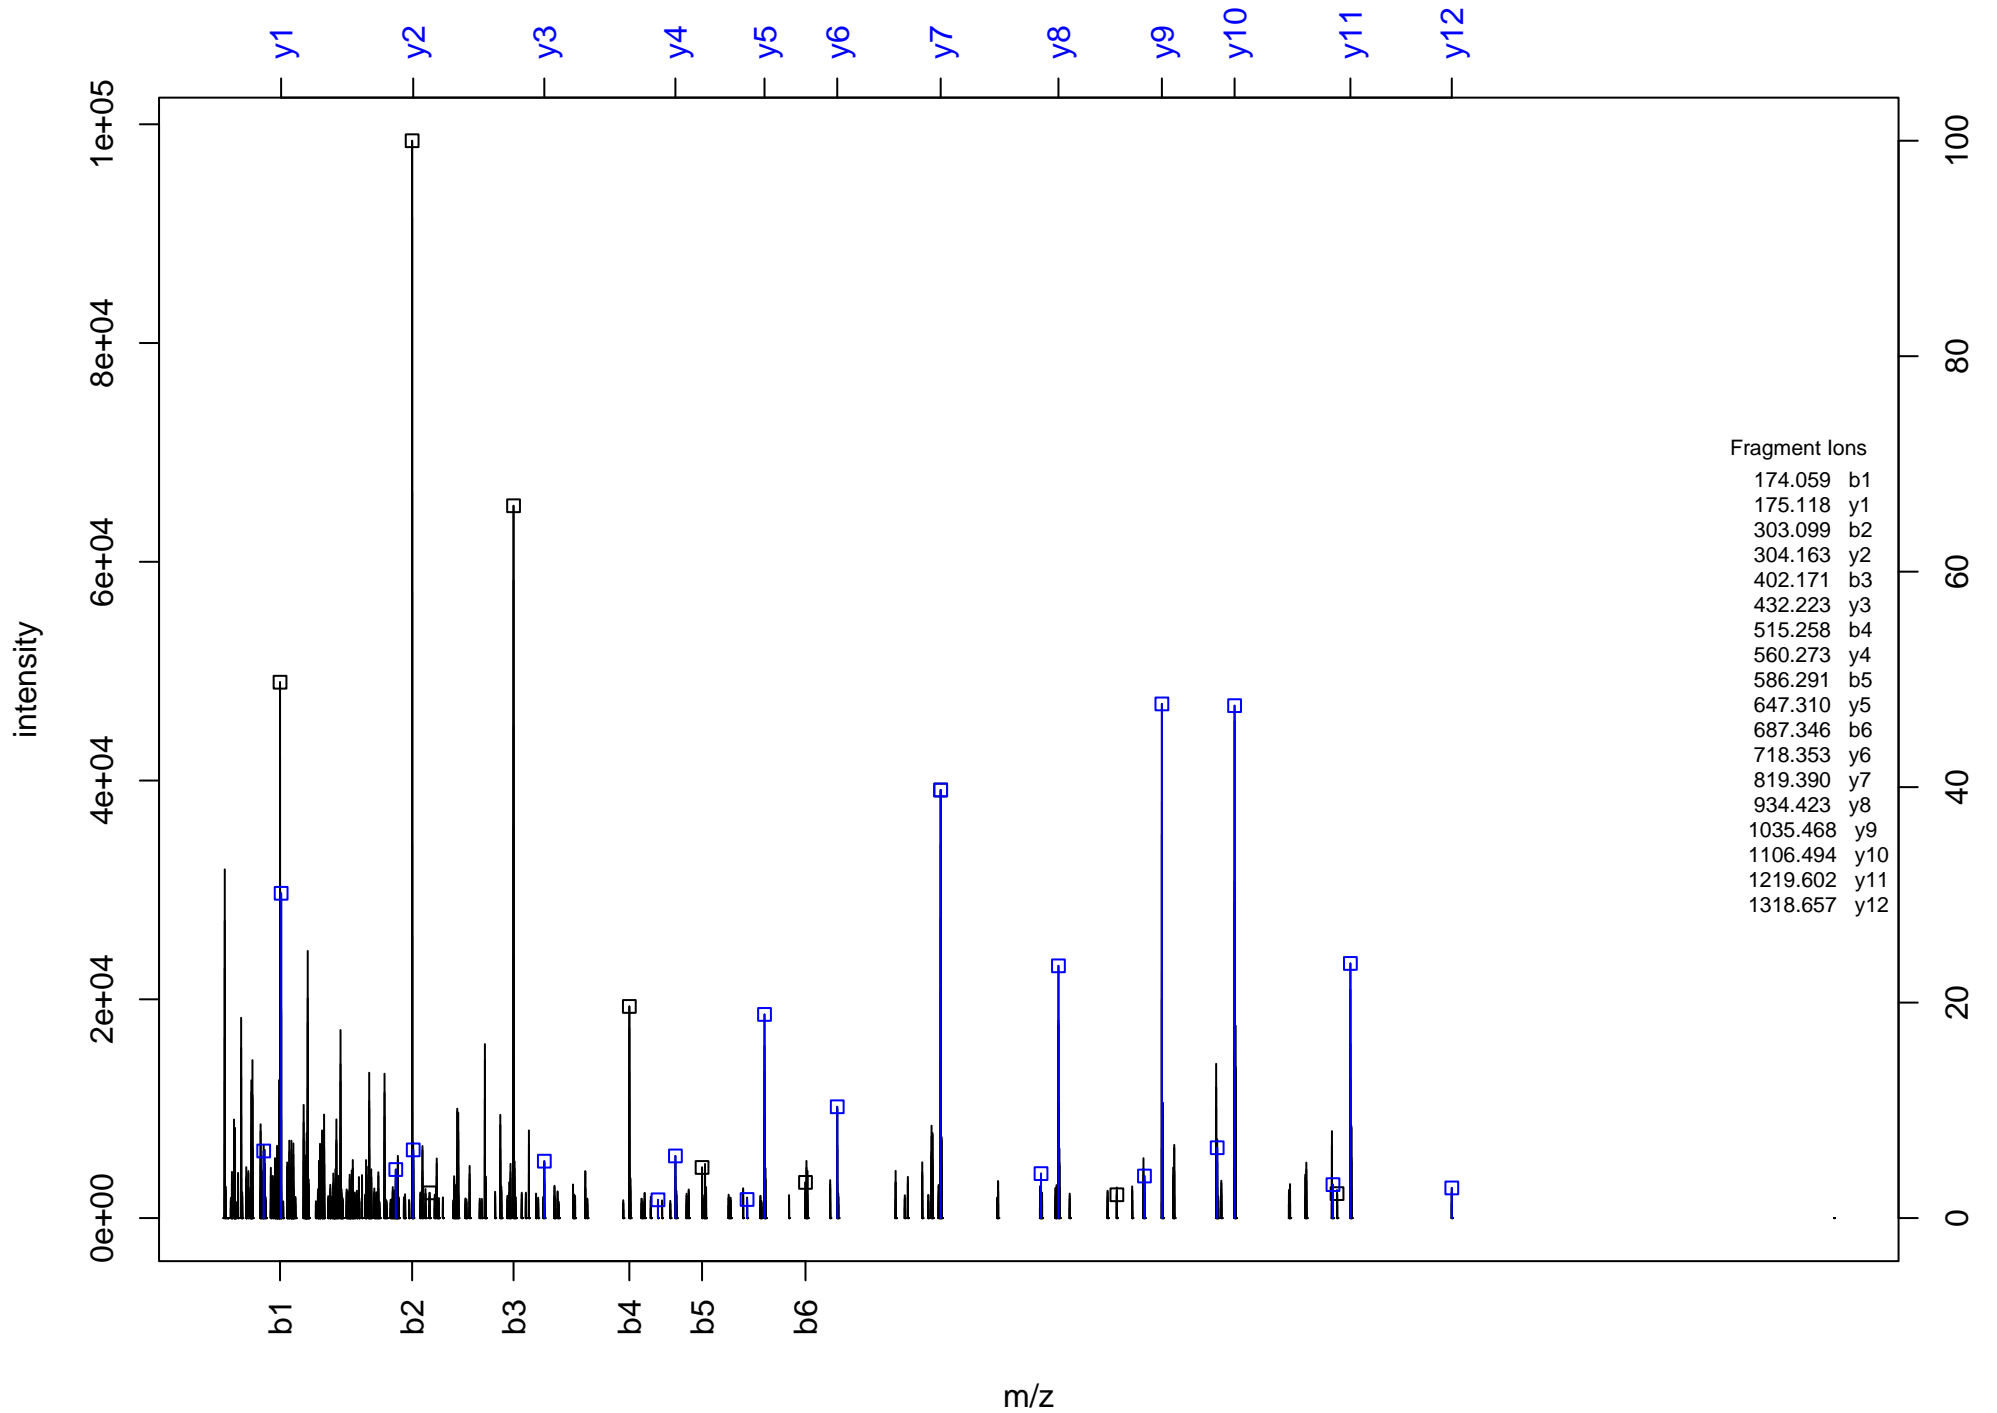

# VEEQLFPLIDDDTR

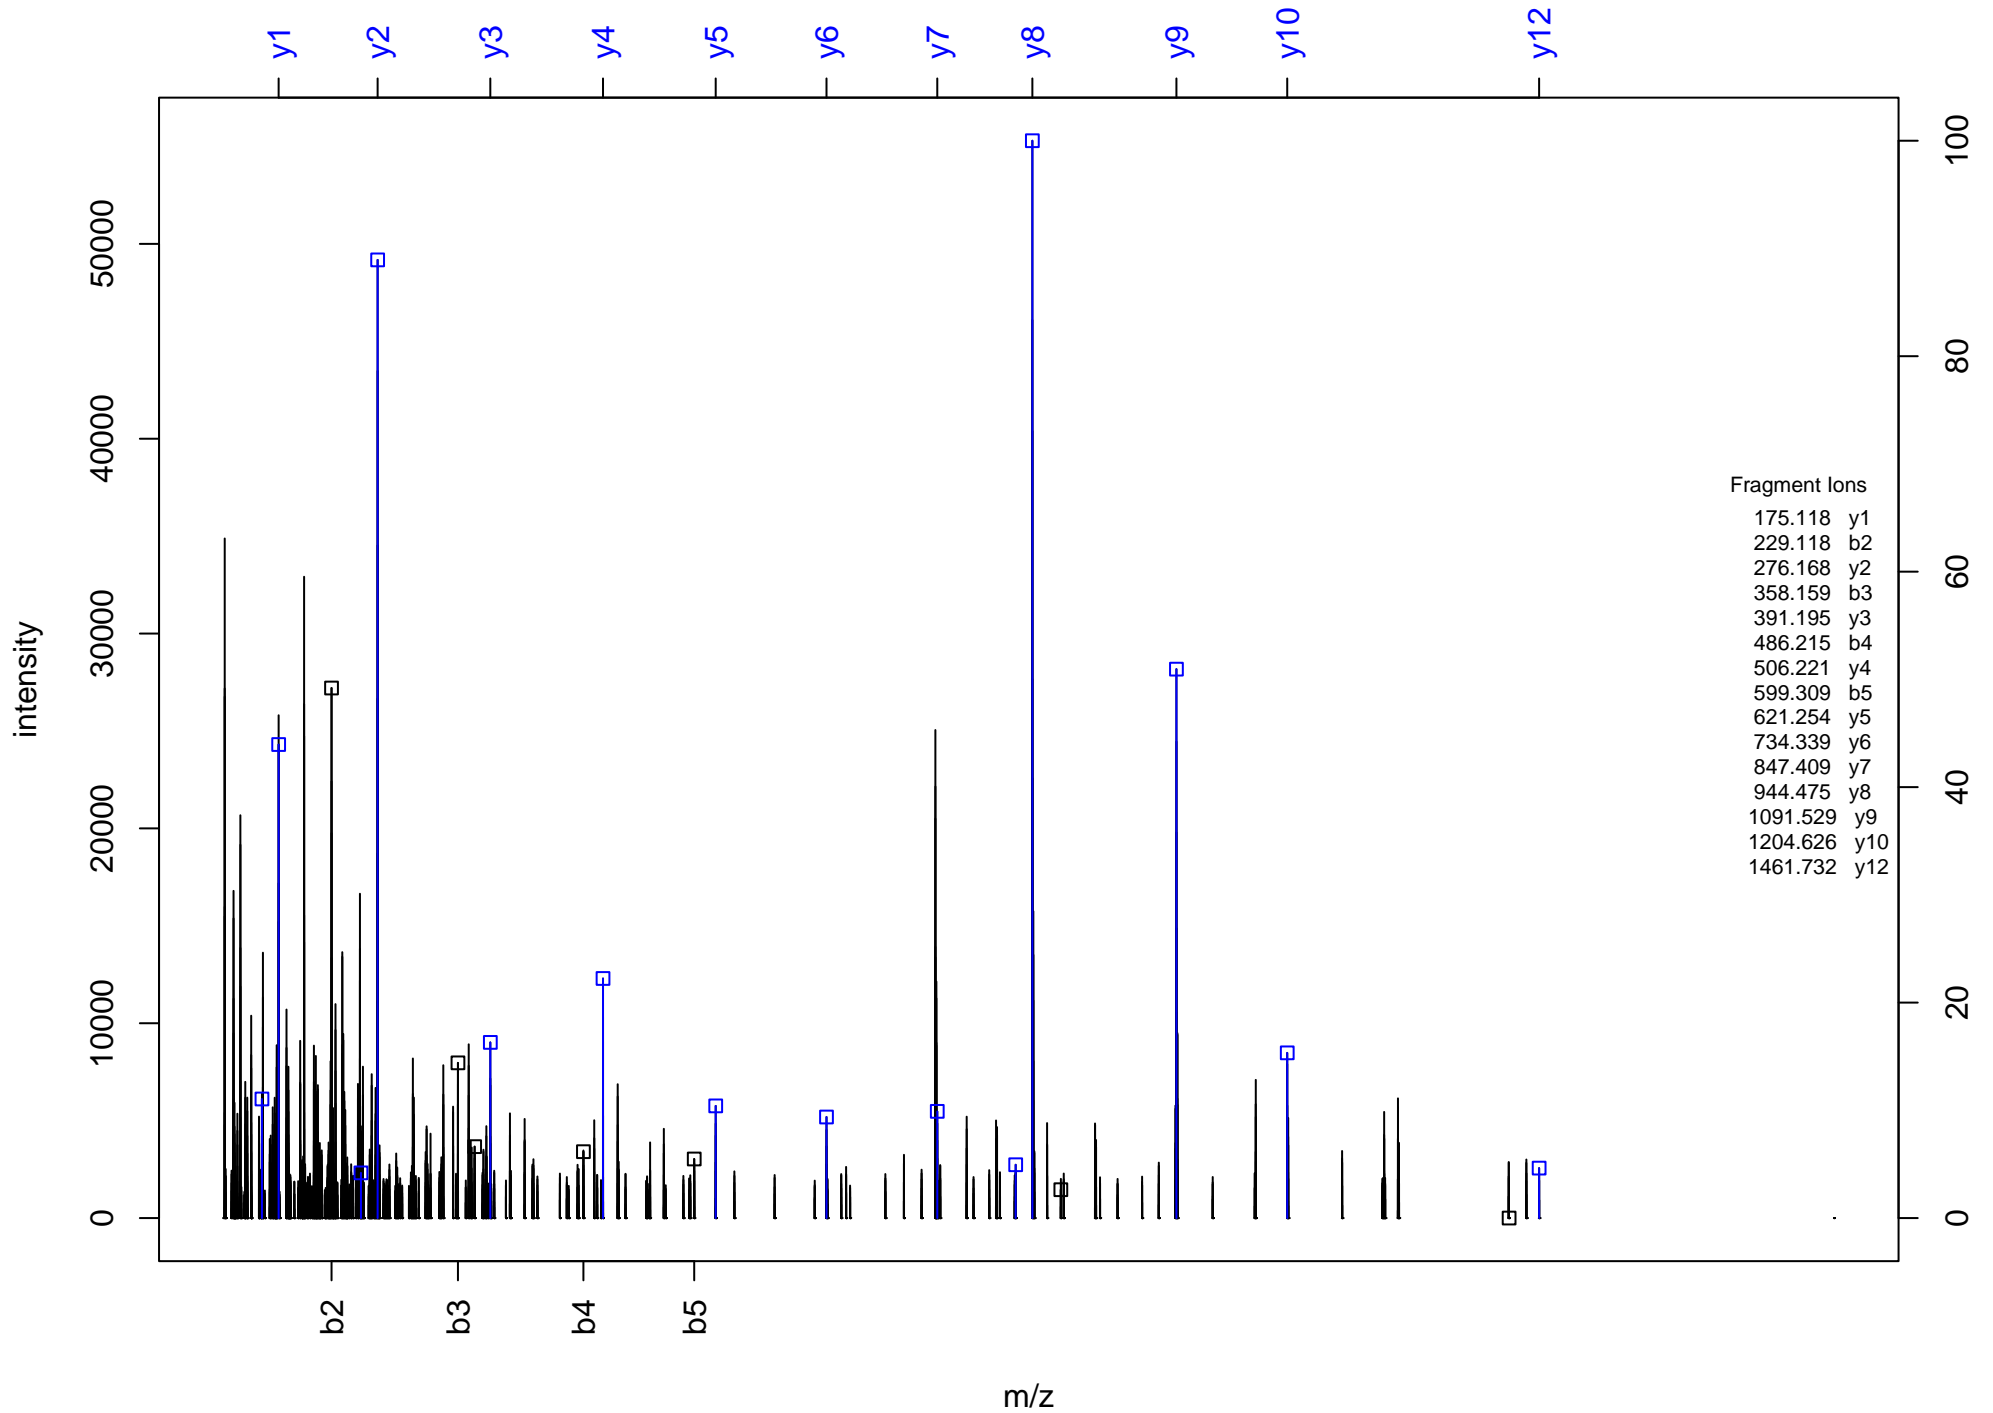

# LAQELPDVTNEDSAFQK

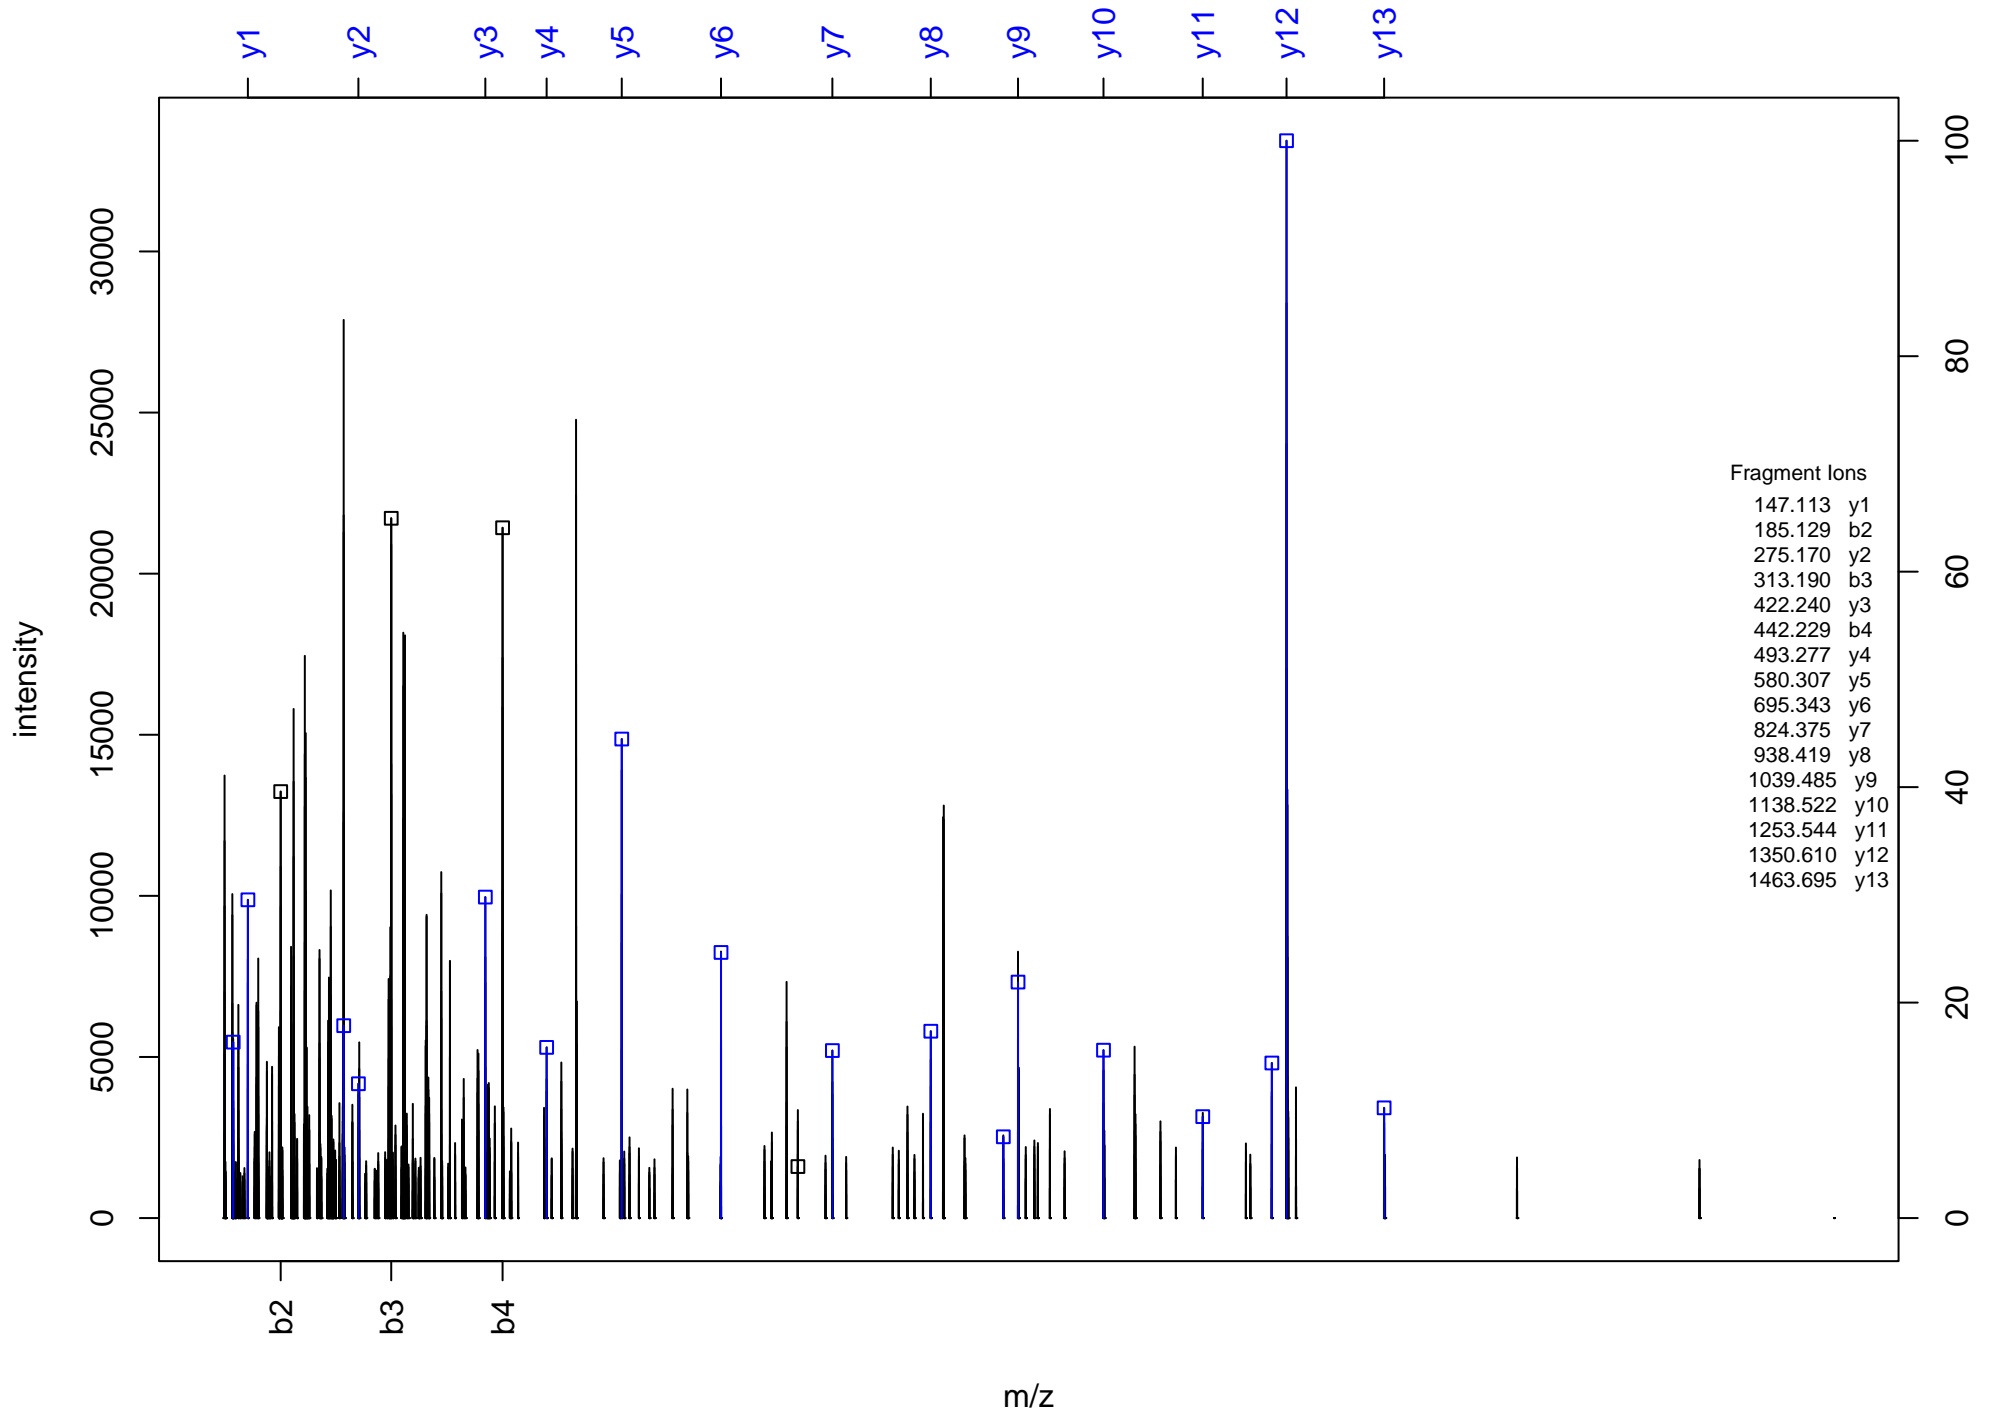

# ITVVDDADTVELCGALK

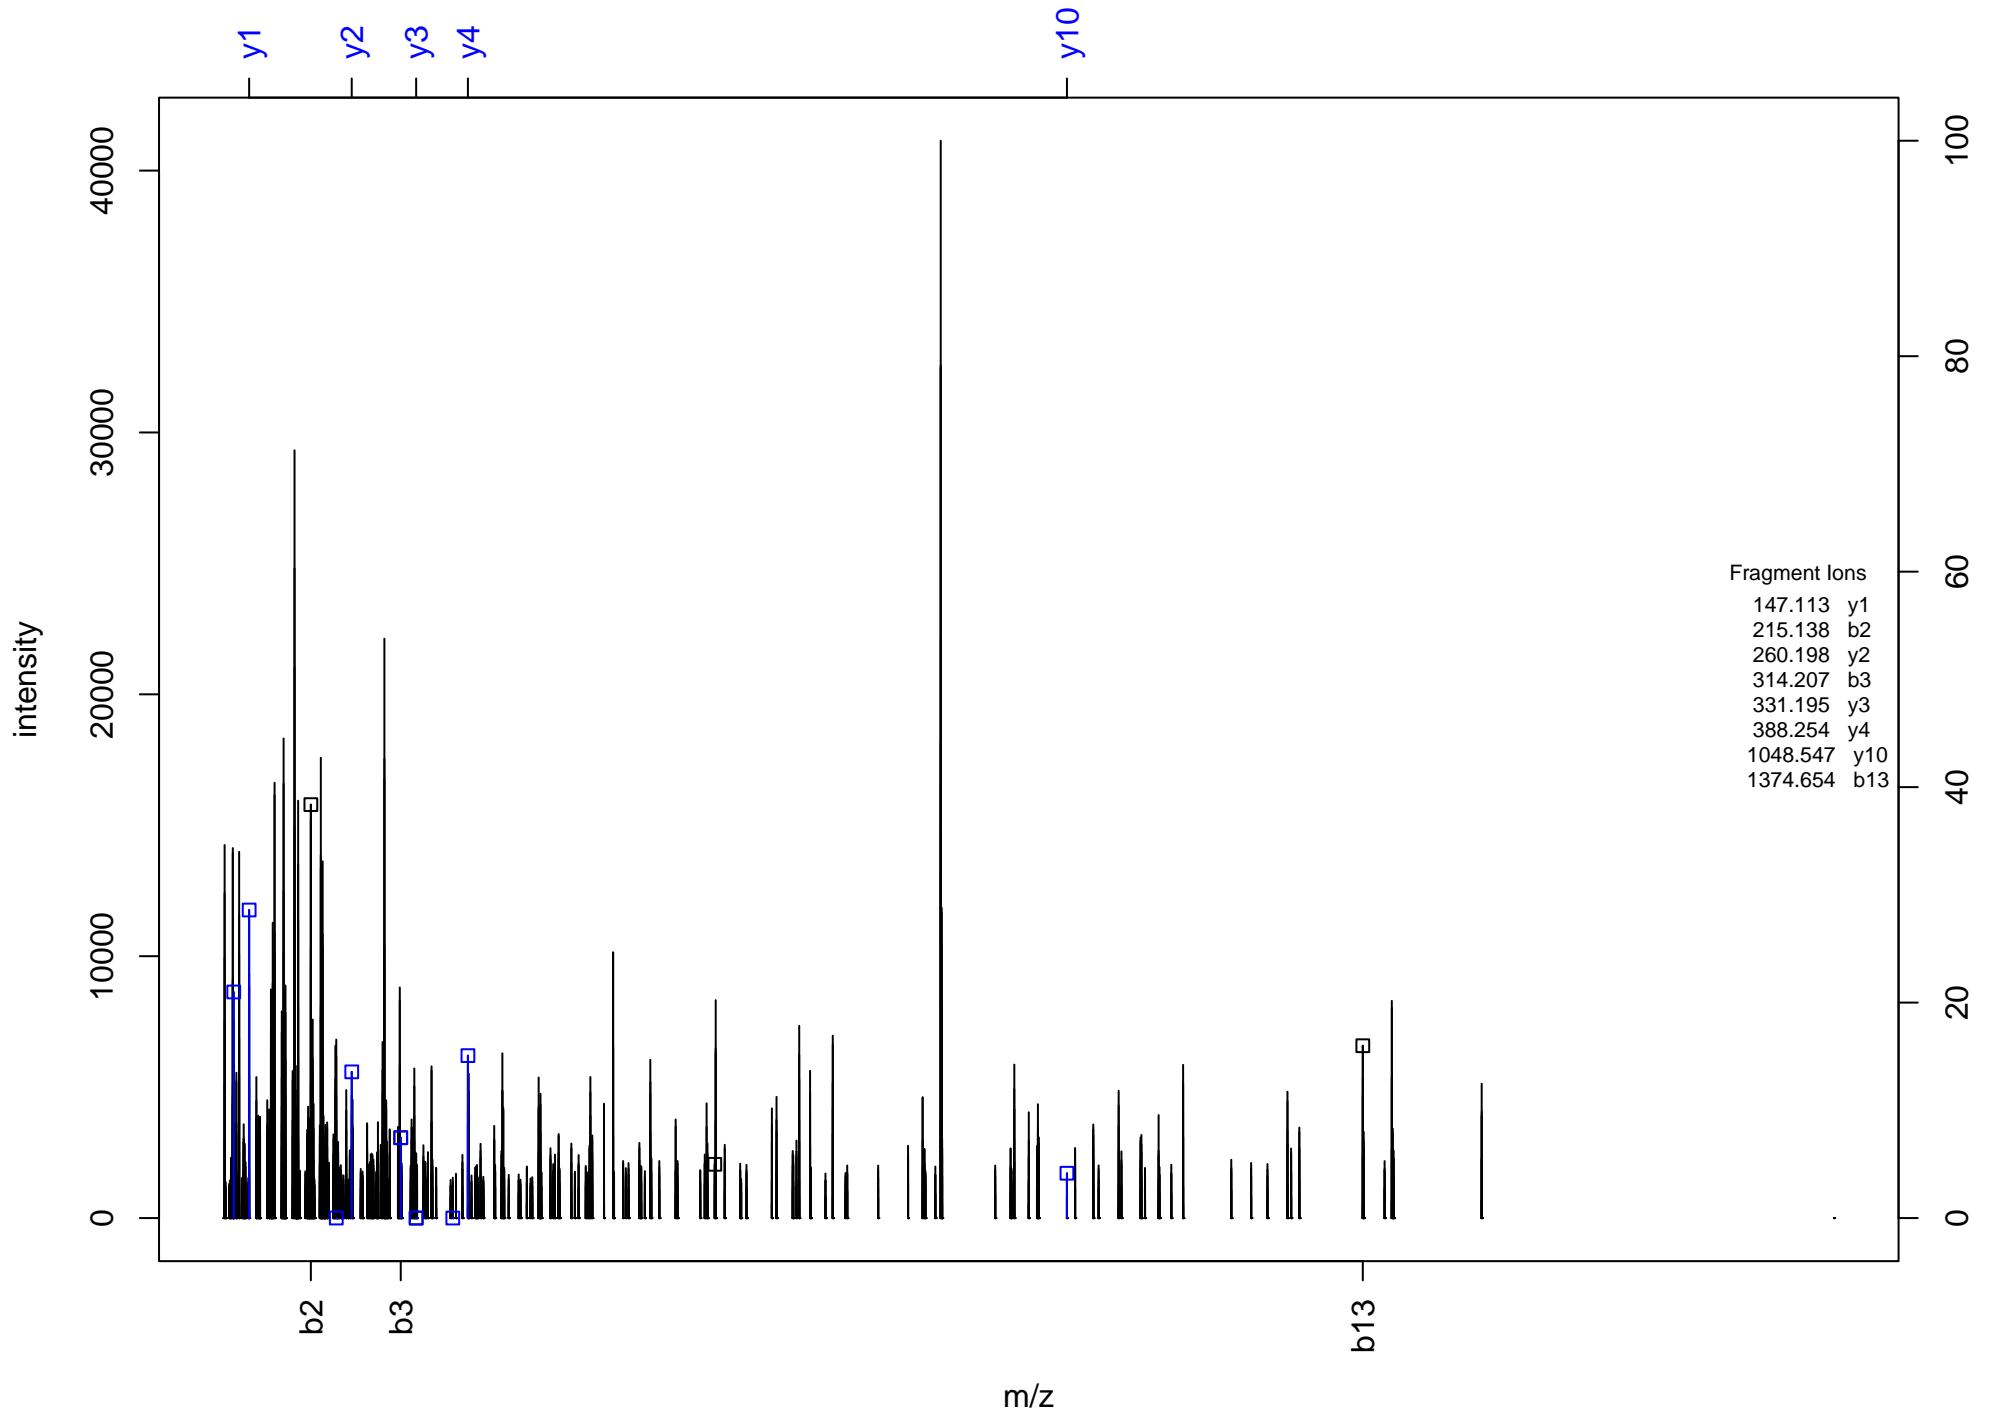



# LAIQGPEDSPSR

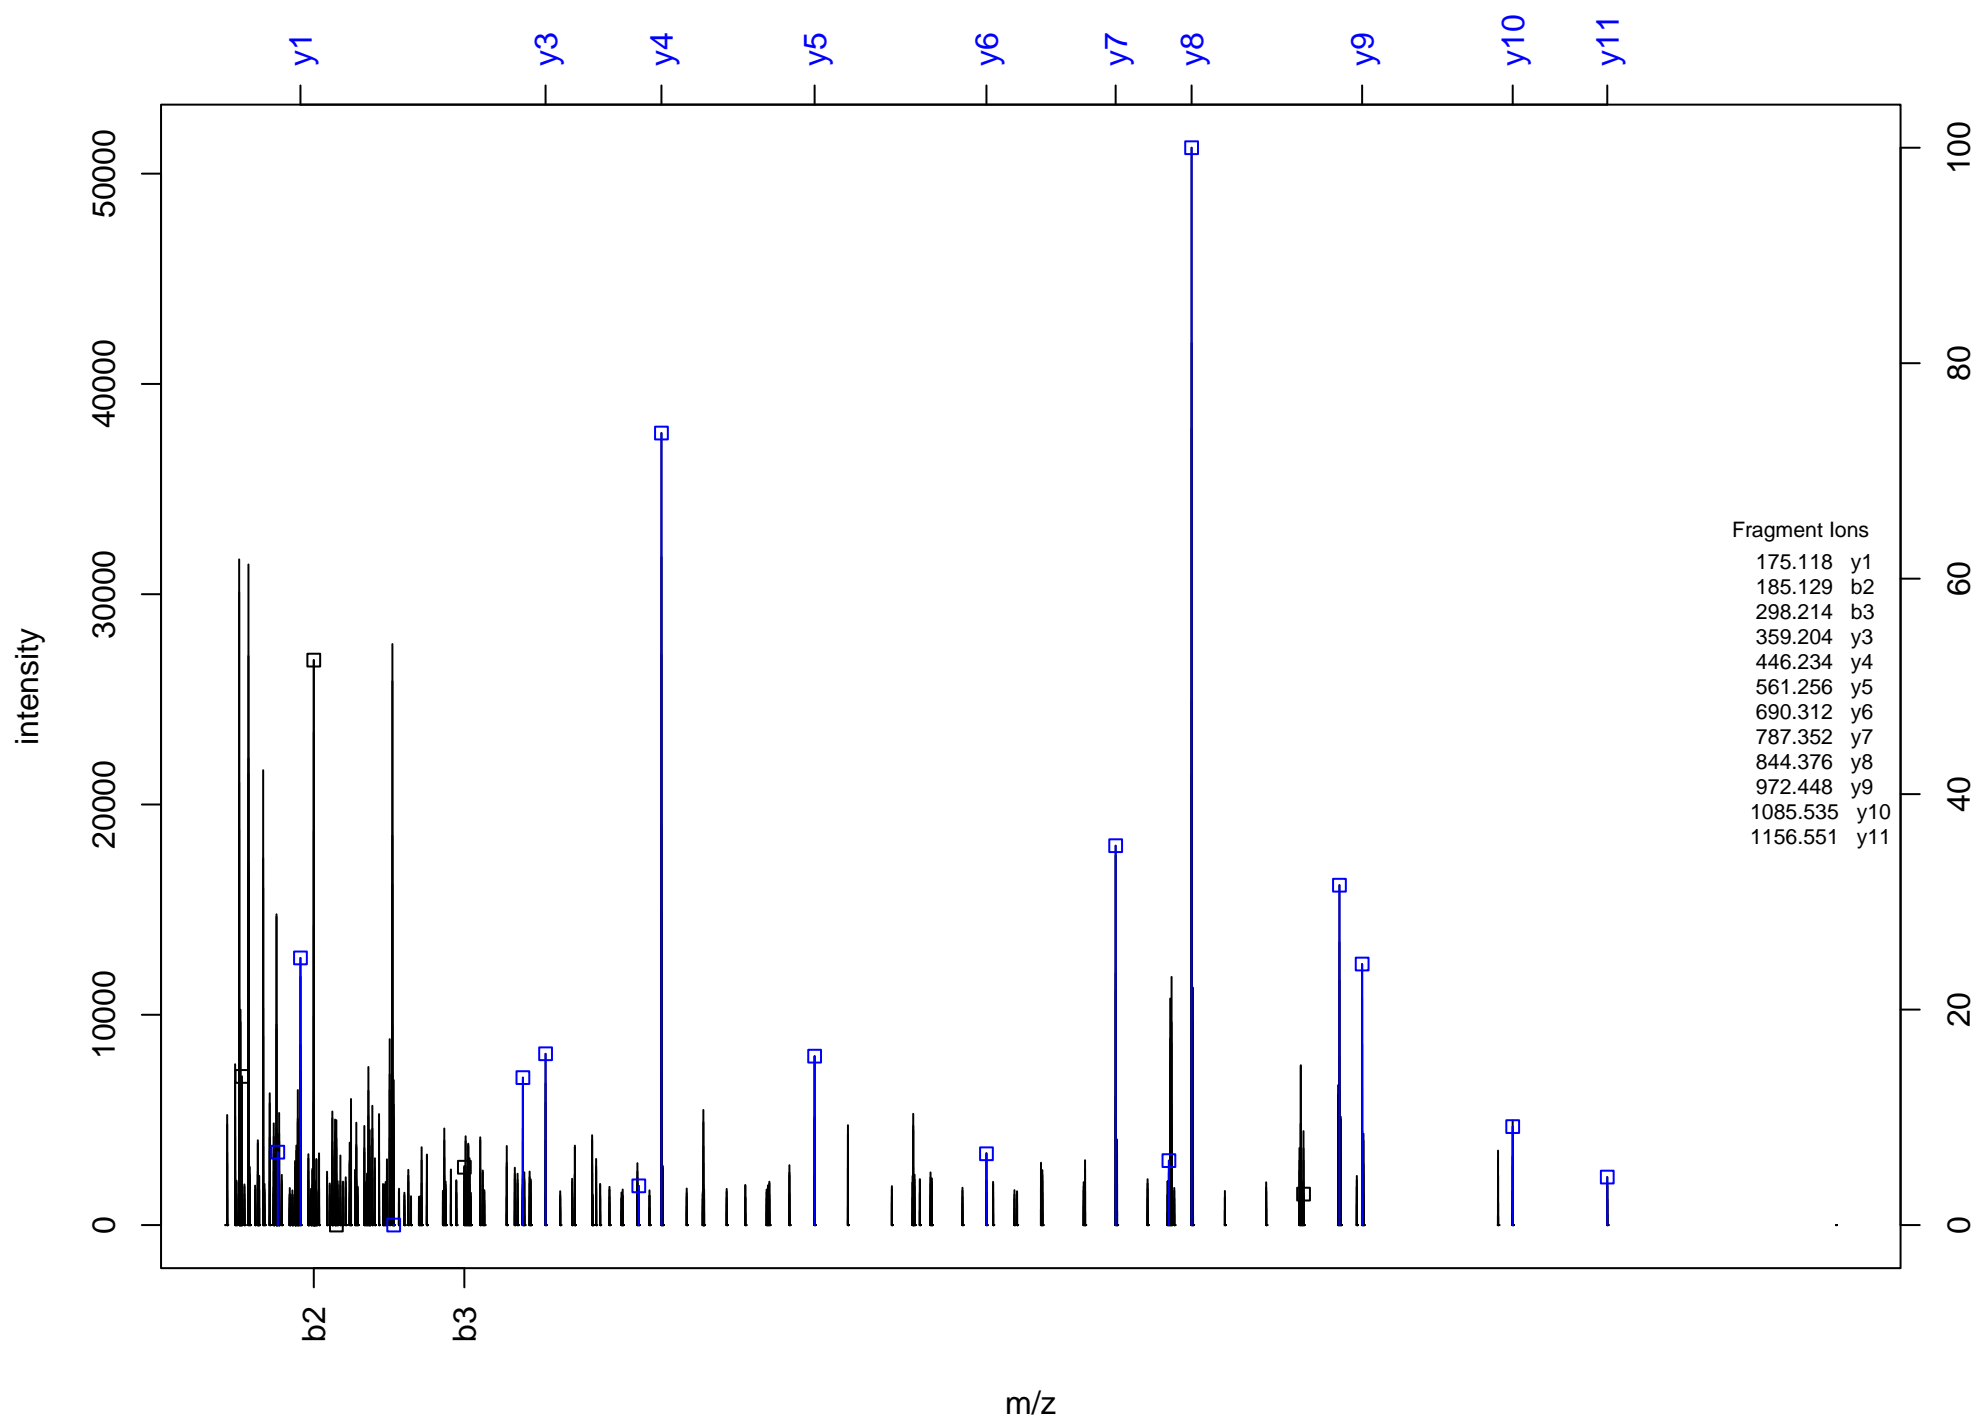

# LQKALEN^SNK

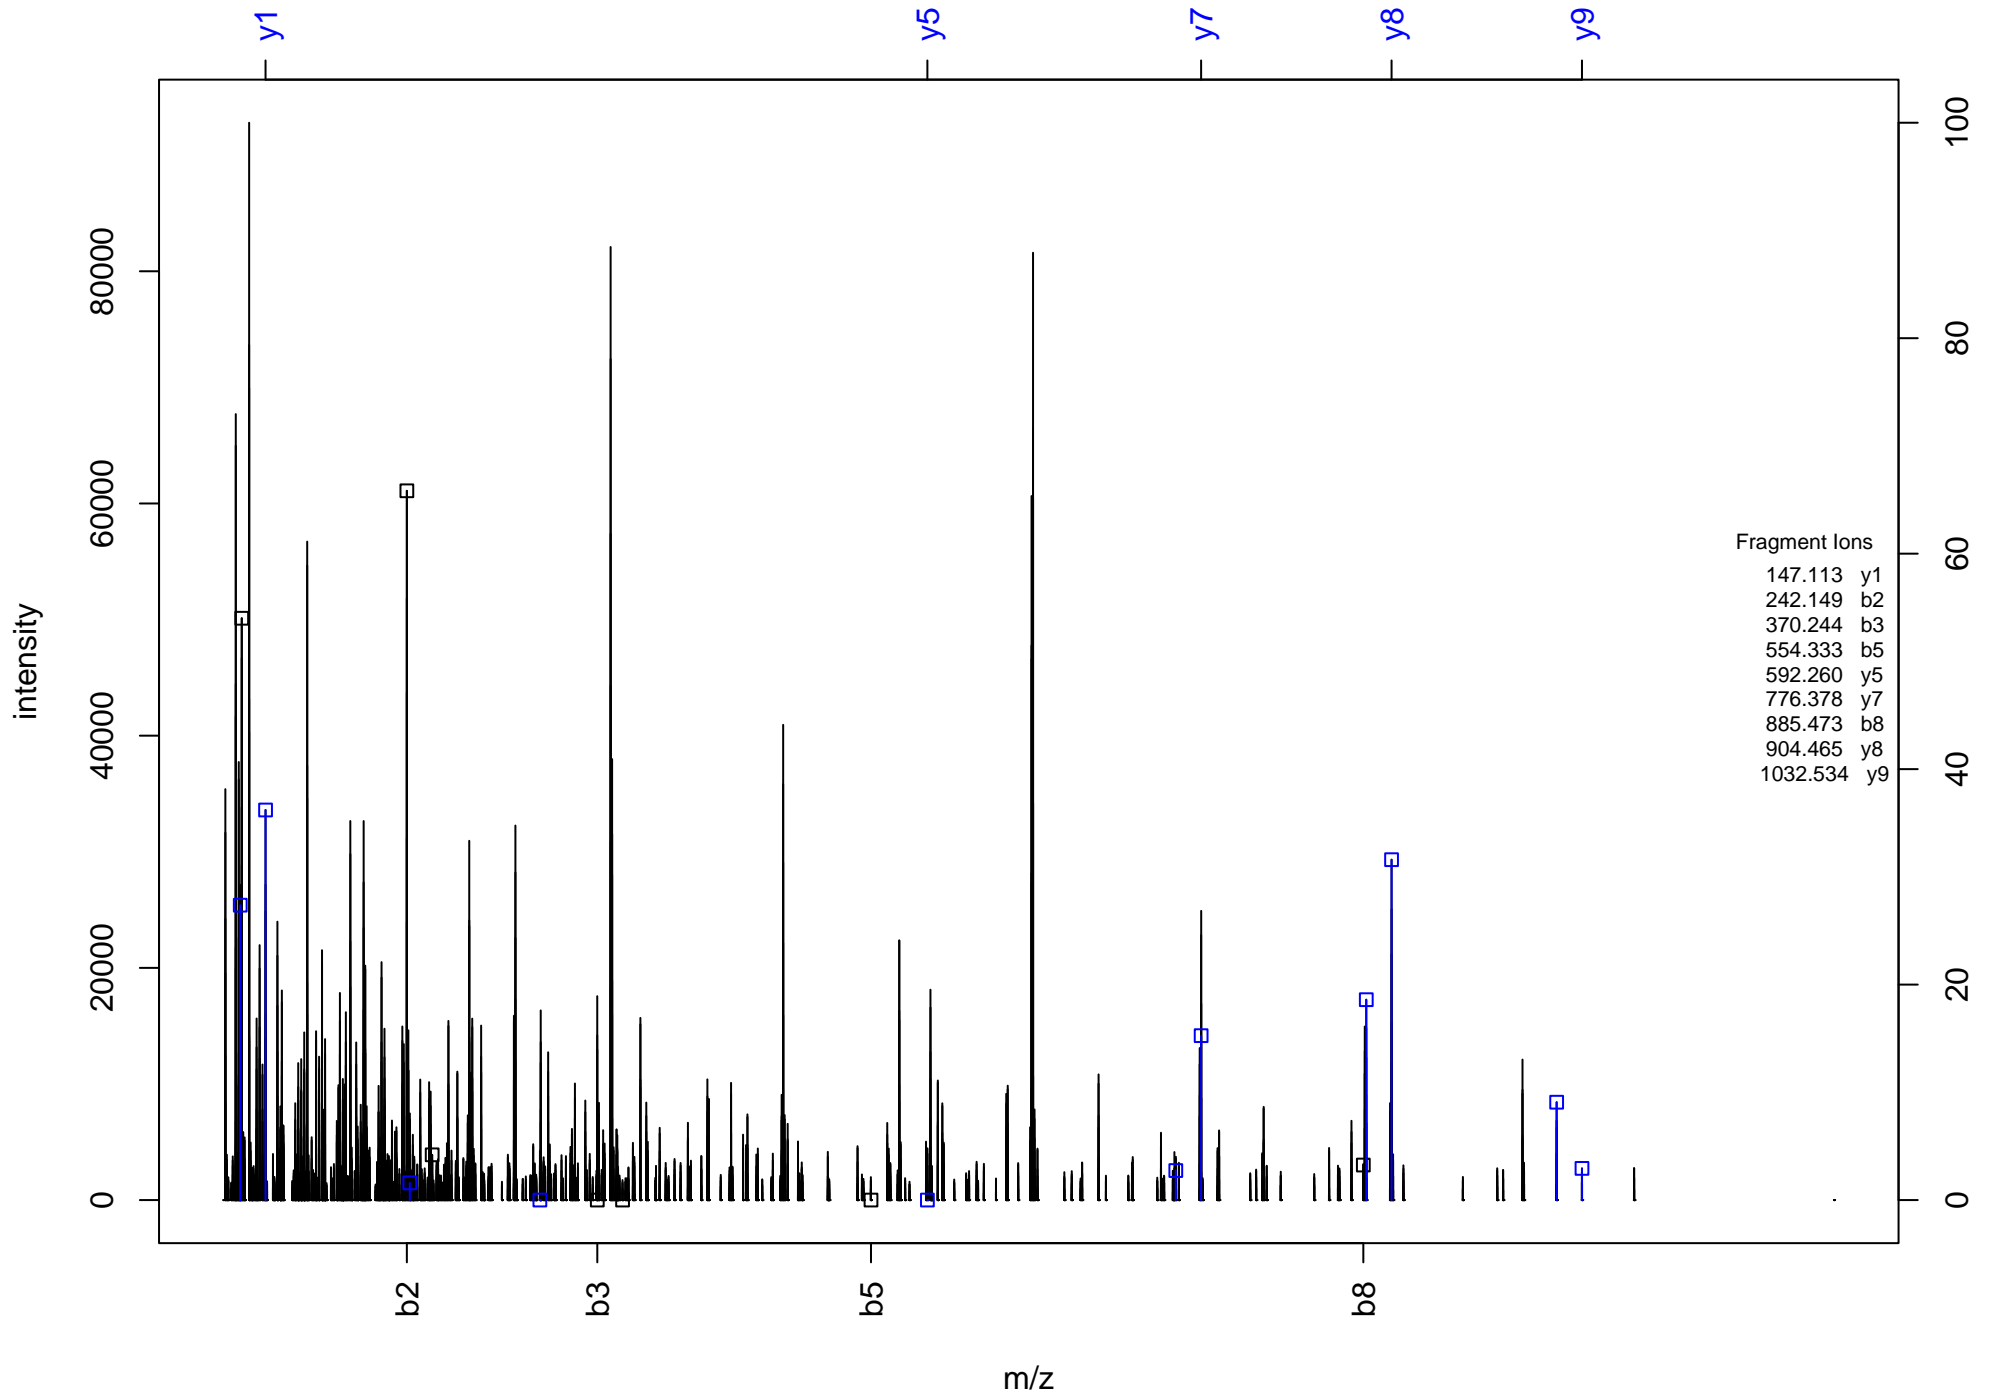

# LGALPDSSSDLPVQK

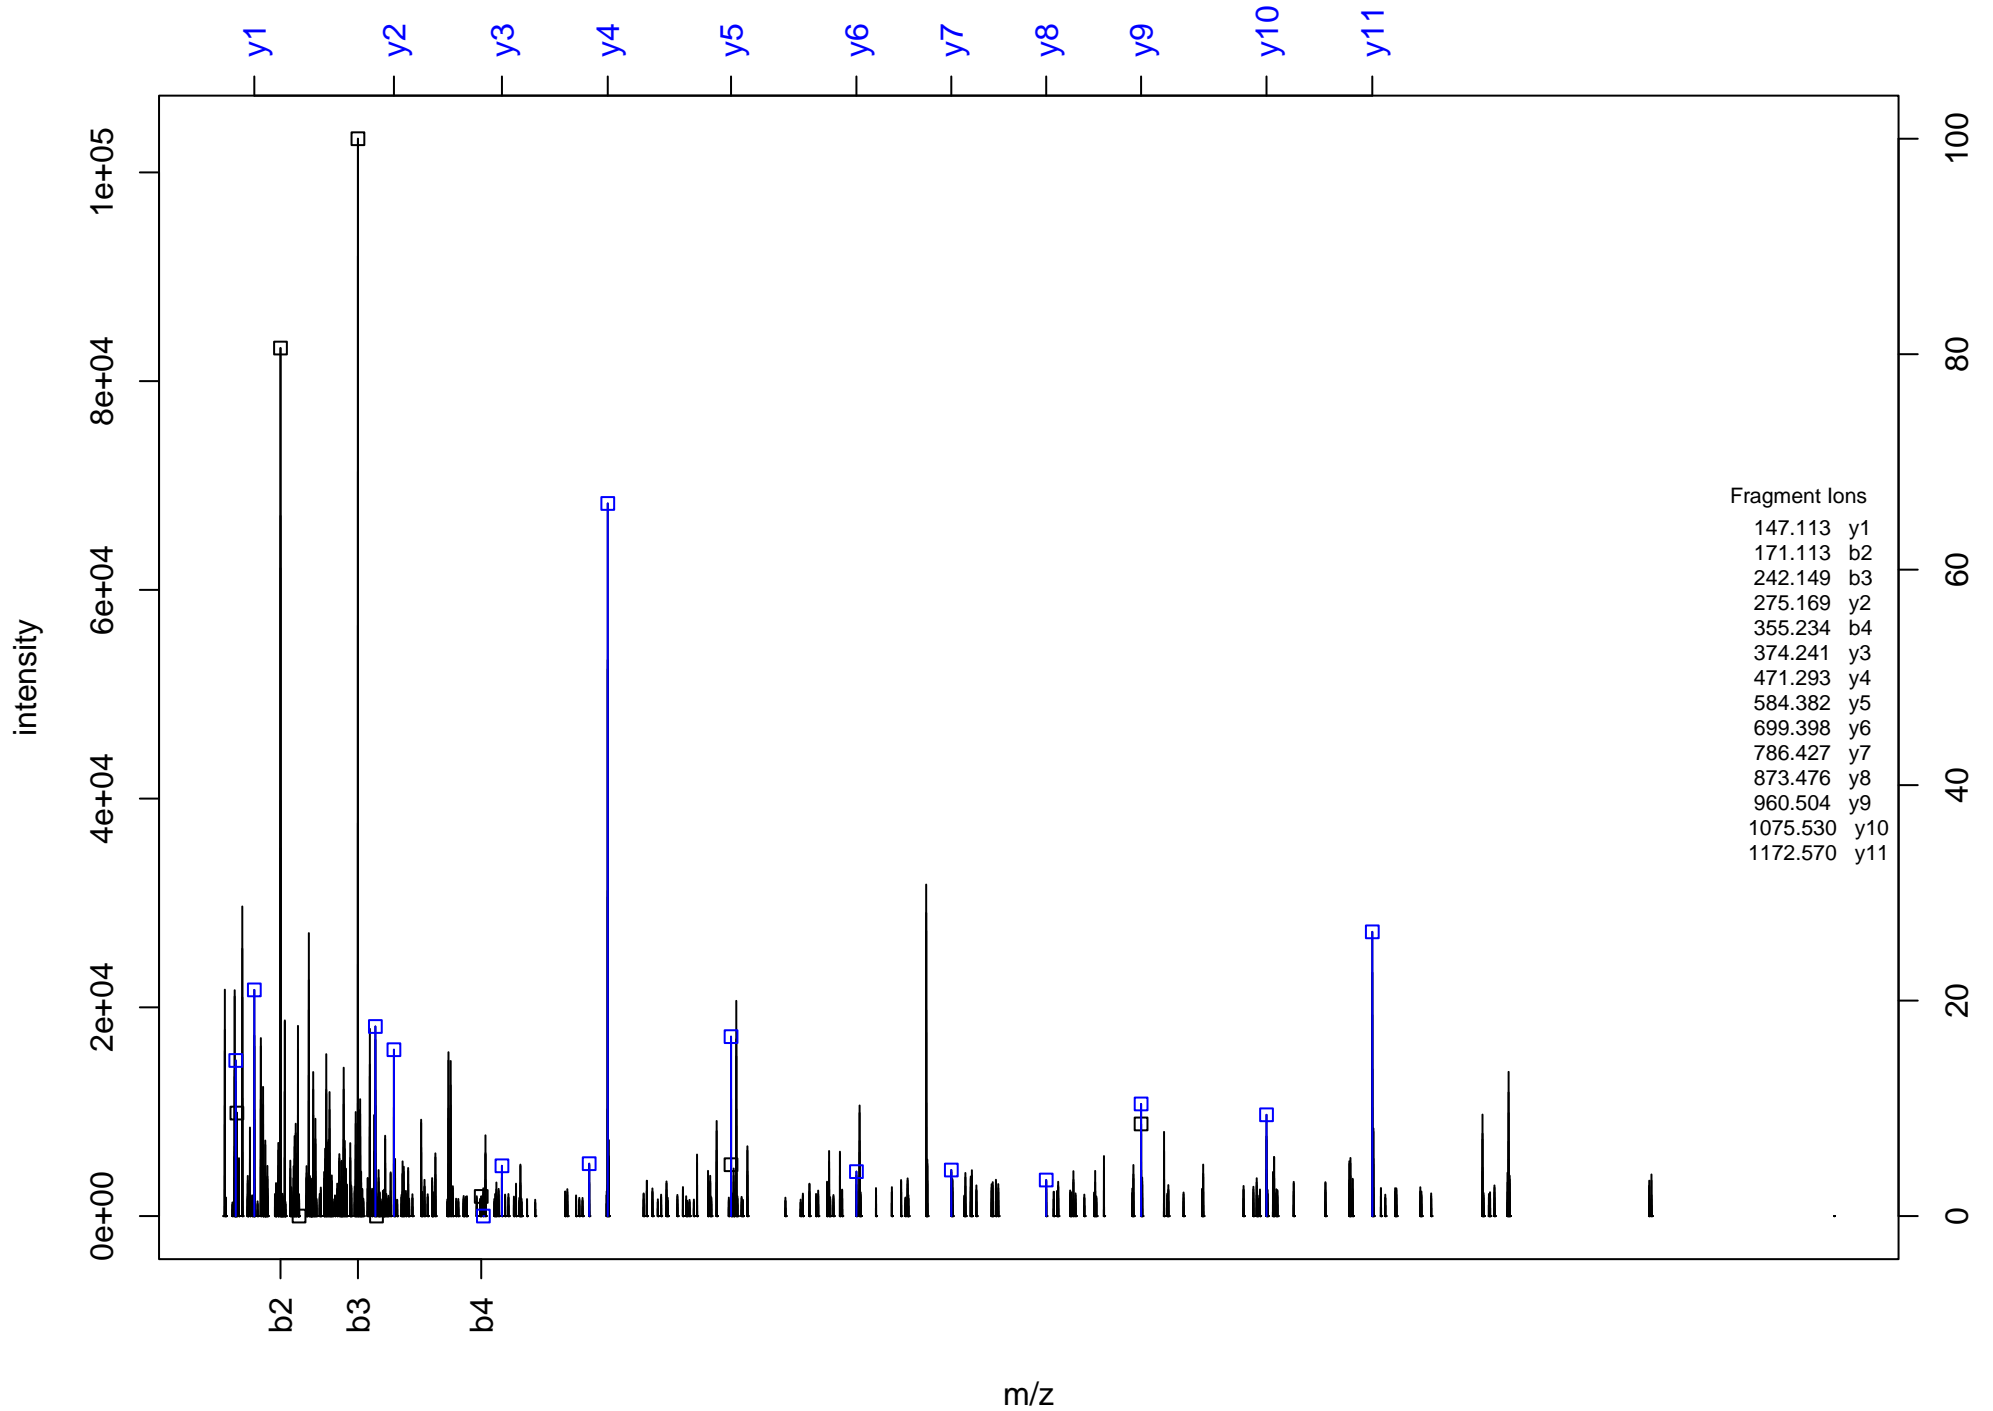

# IRGPEESQPPQLYAAEDDETPAAR

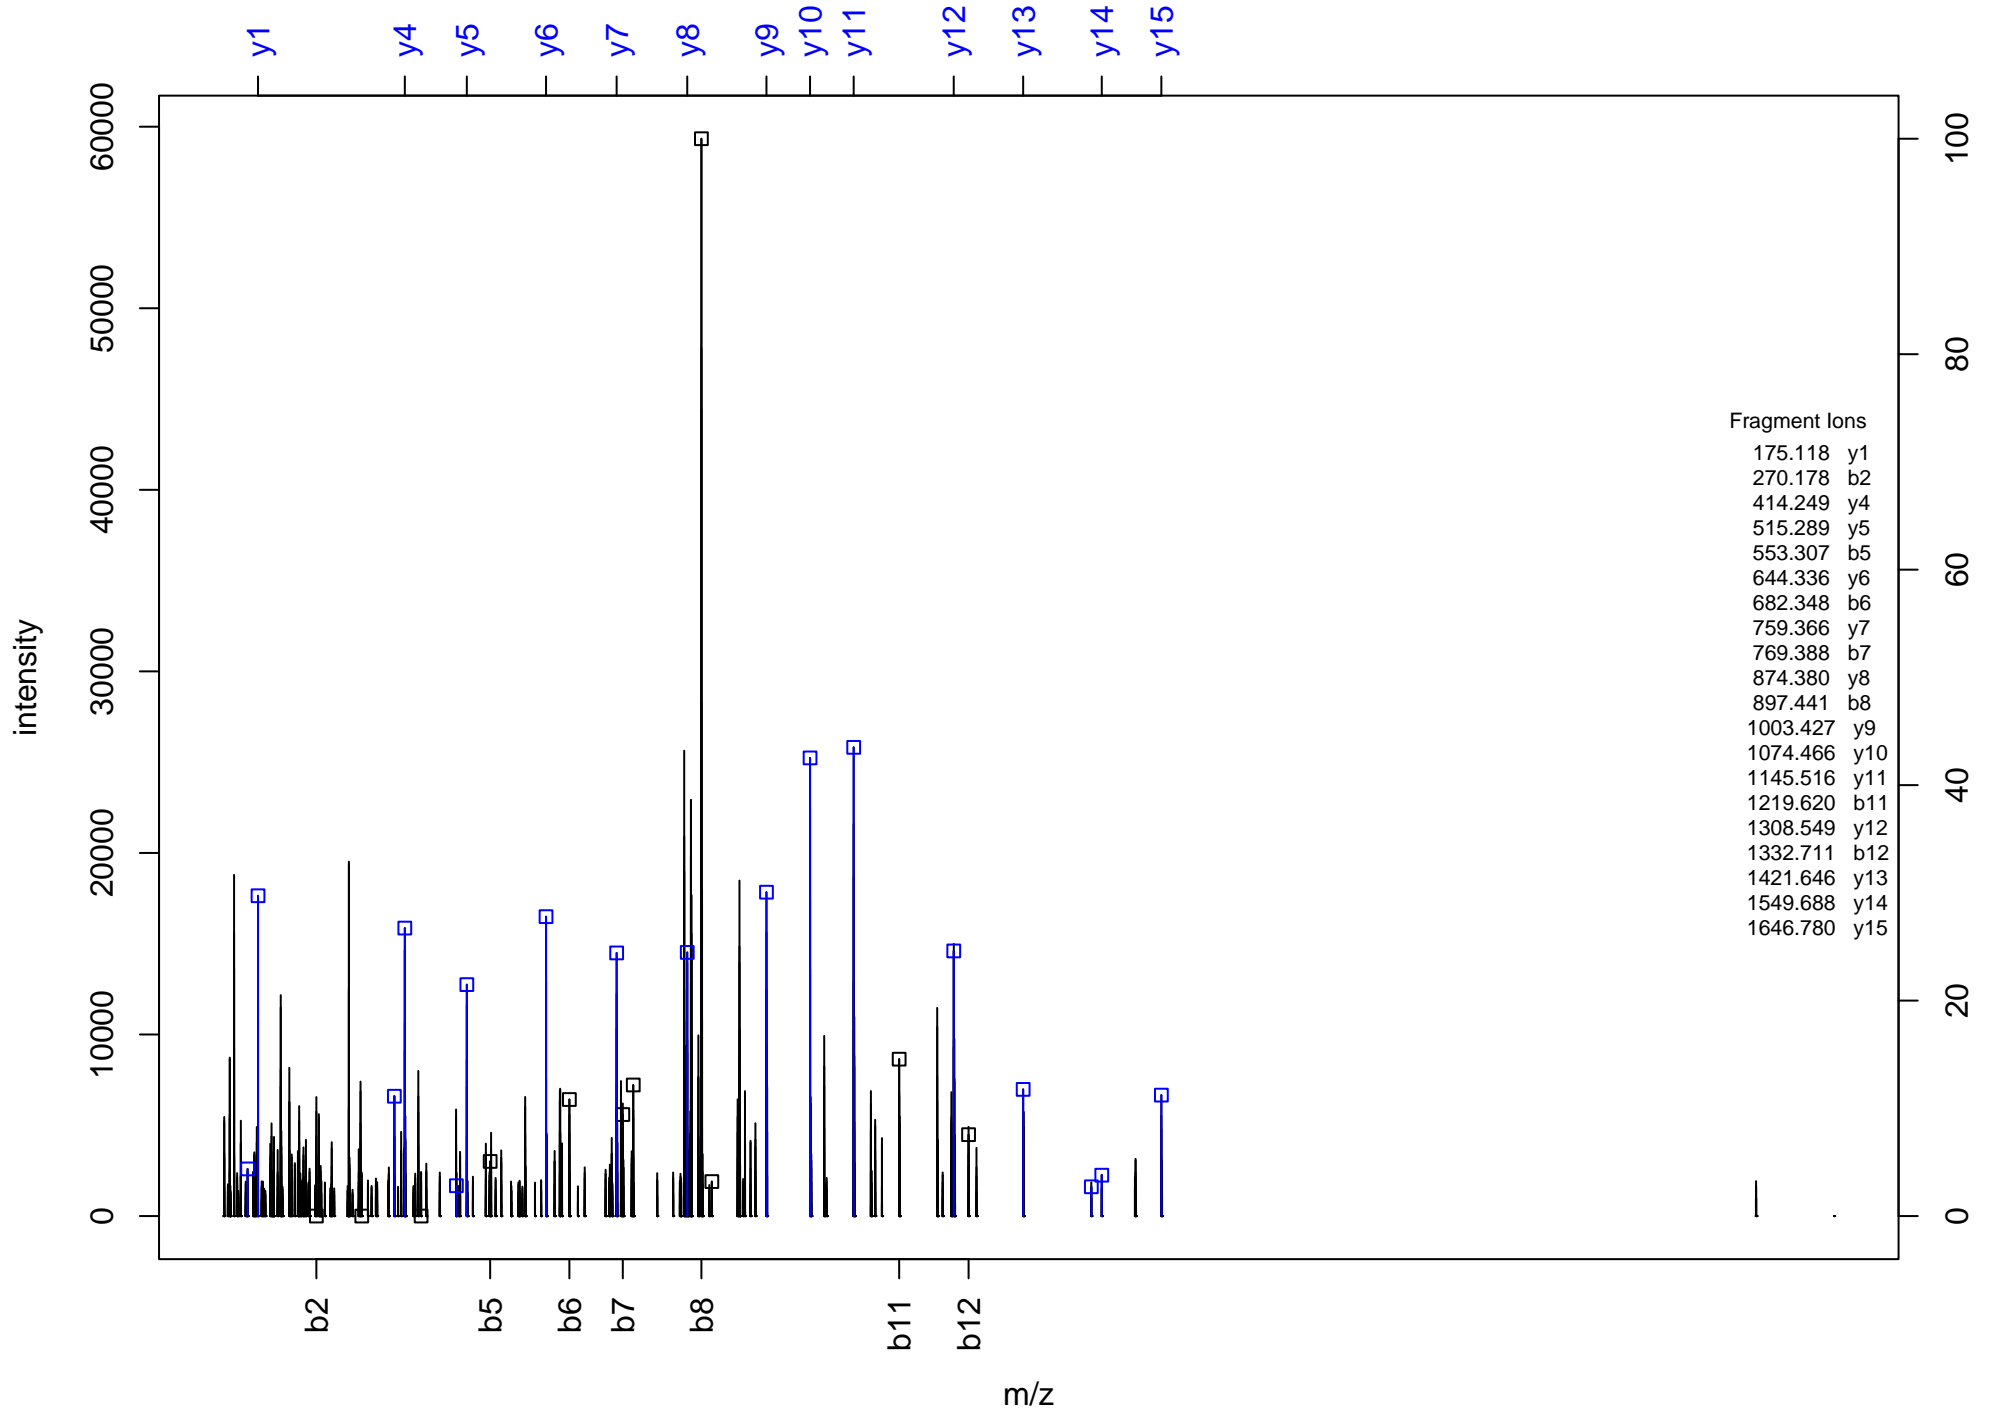

# N<sup>^</sup>QIN<sup>^</sup>N<sup>^</sup>N<sup>^</sup>KKPNETK

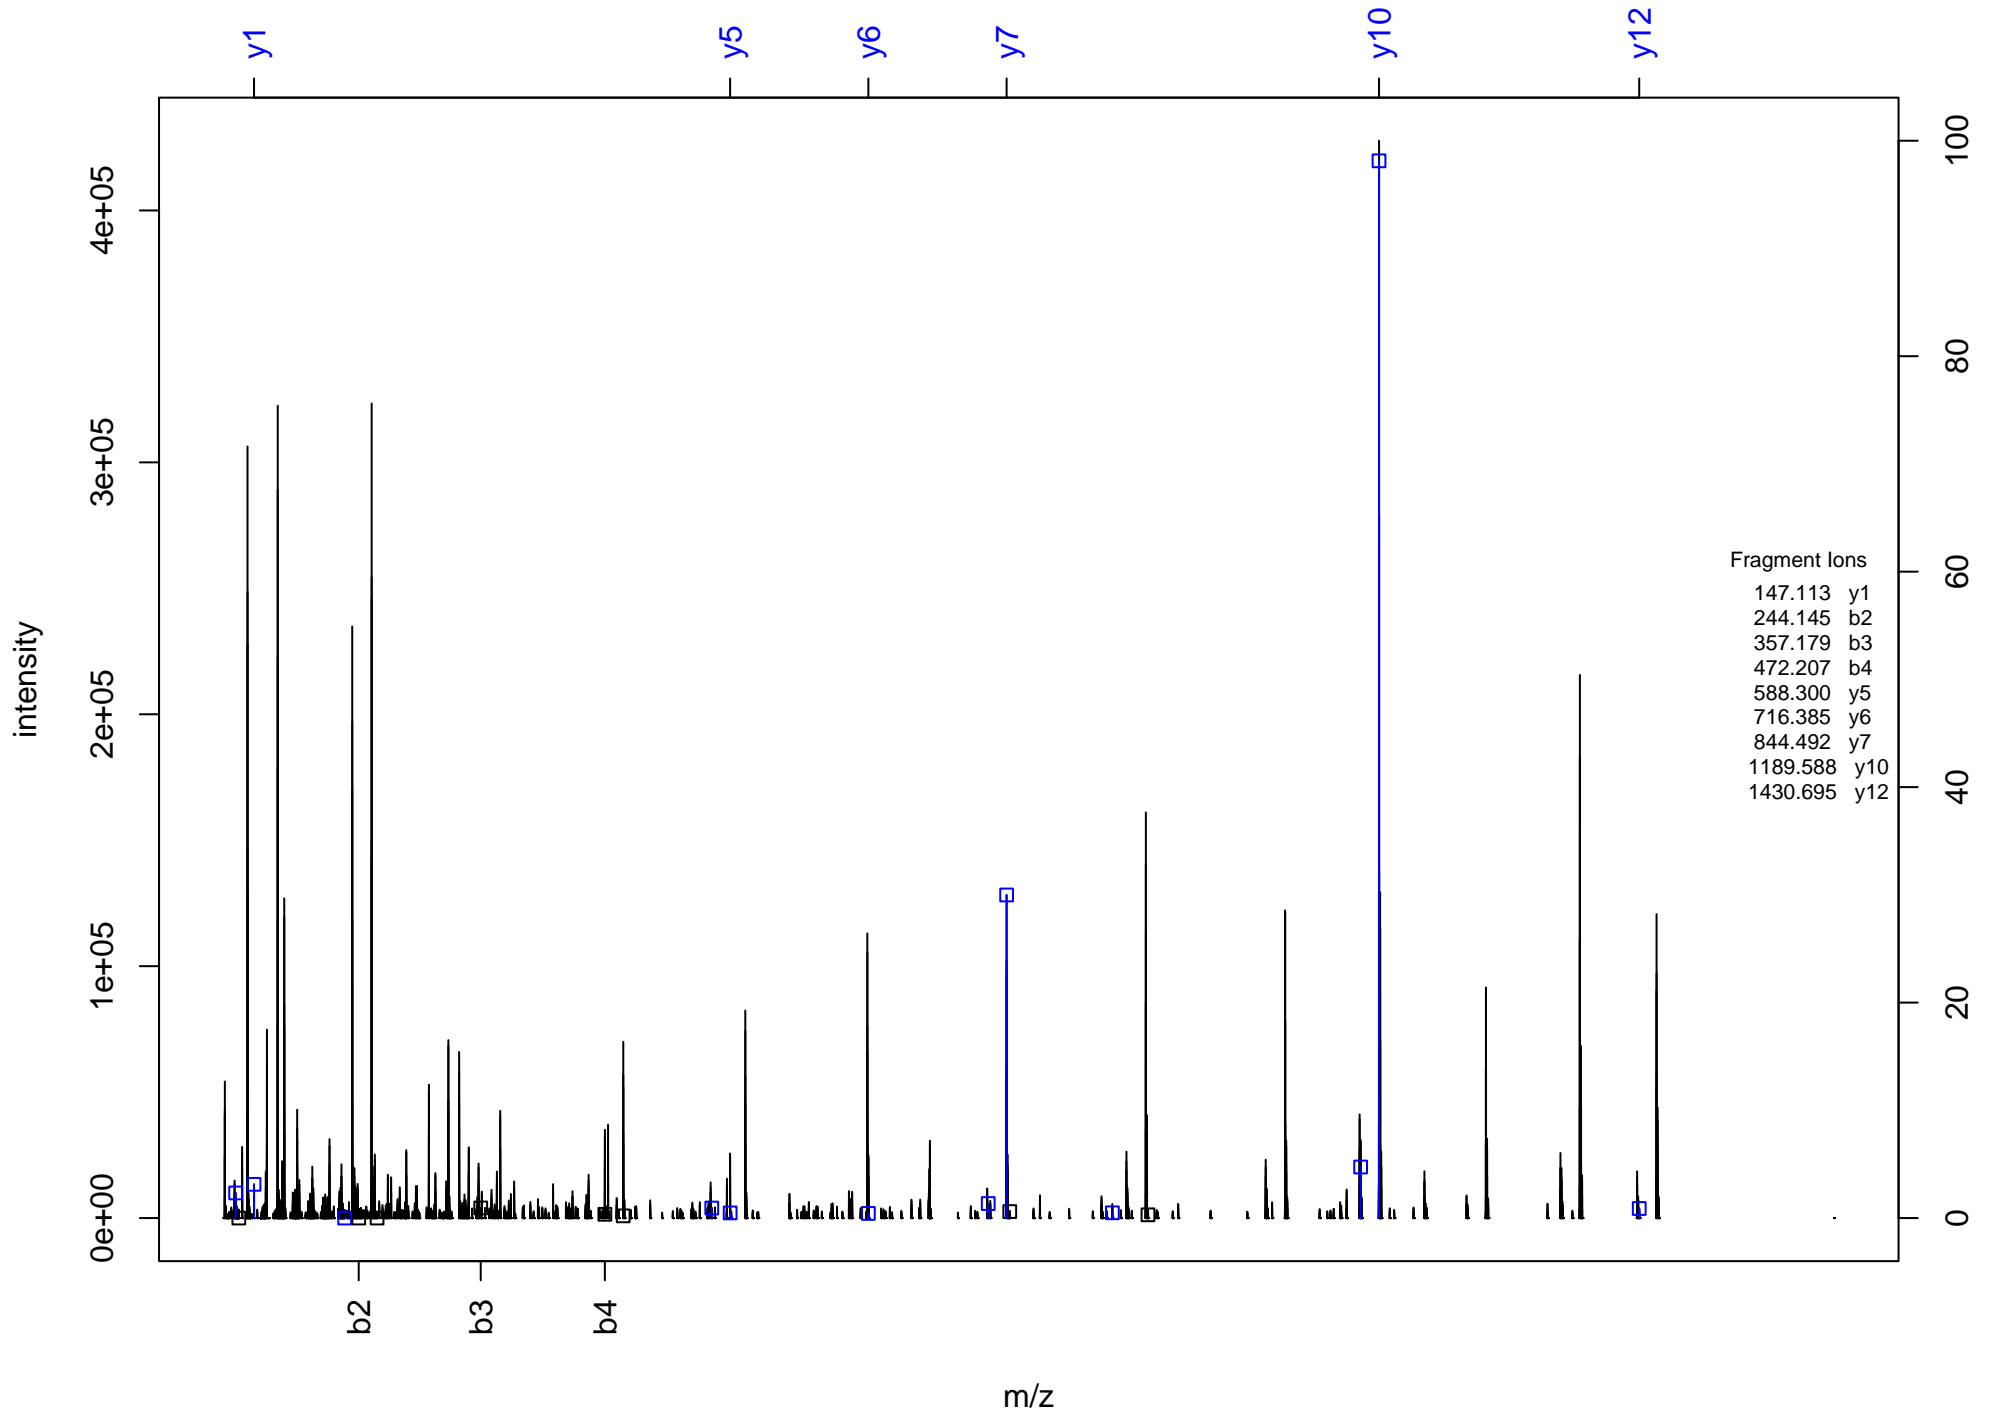

# SDSEPTPGCSGPGPAPVR

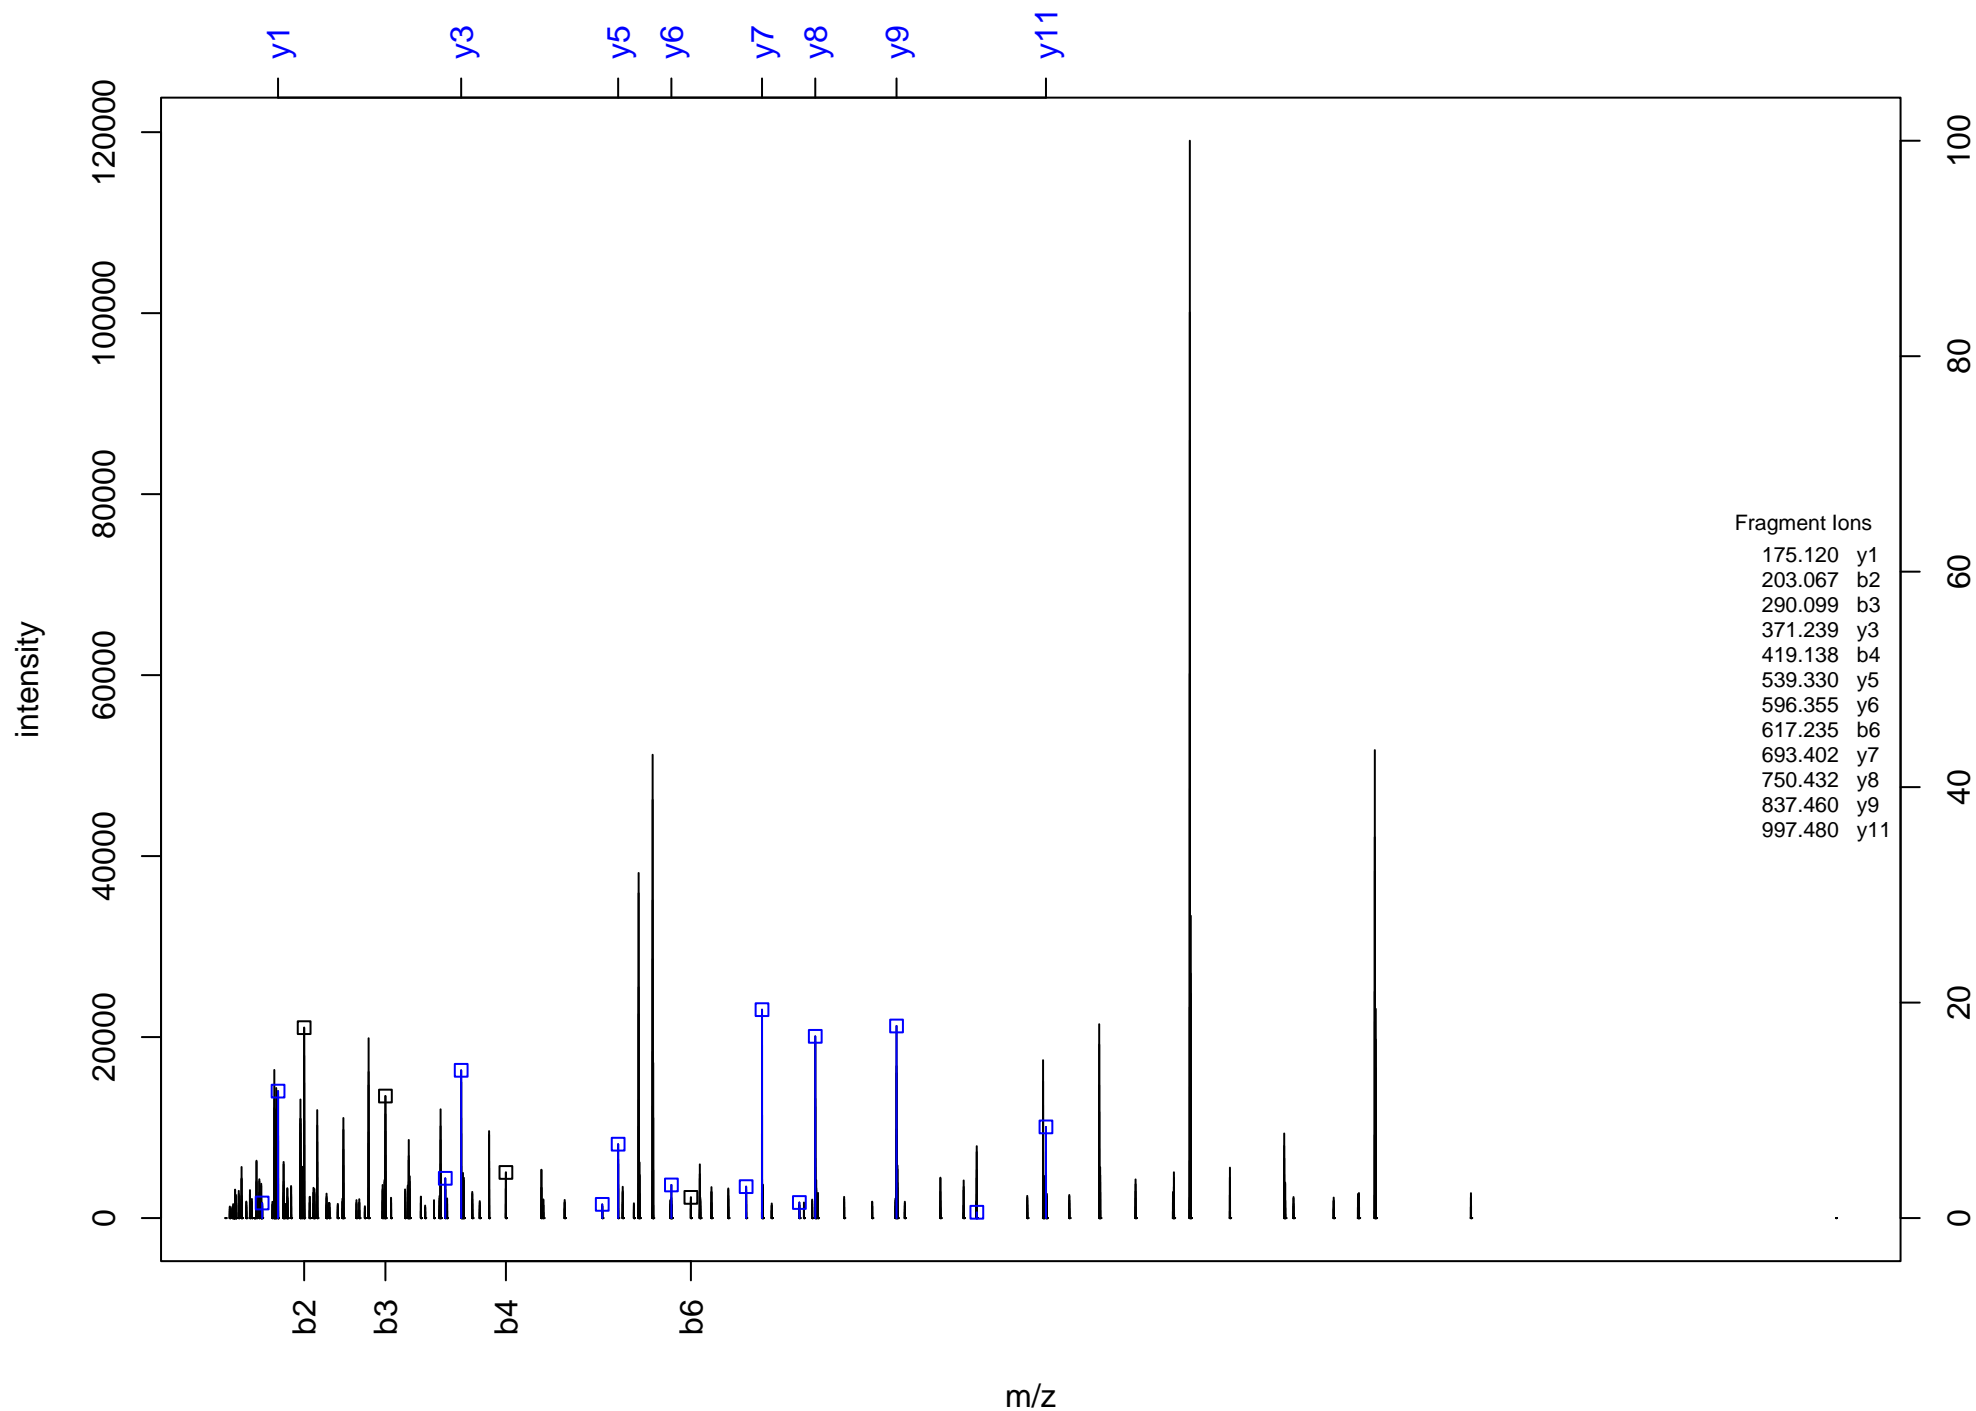

Fragment Ions

|         |     |
|---------|-----|
| 175.120 | y1  |
| 203.067 | b2  |
| 290.099 | b3  |
| 371.239 | y3  |
| 419.138 | b4  |
| 539.330 | y5  |
| 596.355 | y6  |
| 617.235 | b6  |
| 693.402 | y7  |
| 750.432 | y8  |
| 837.460 | y9  |
| 997.480 | y11 |

# QAVGEEPDEDLFPTAAK

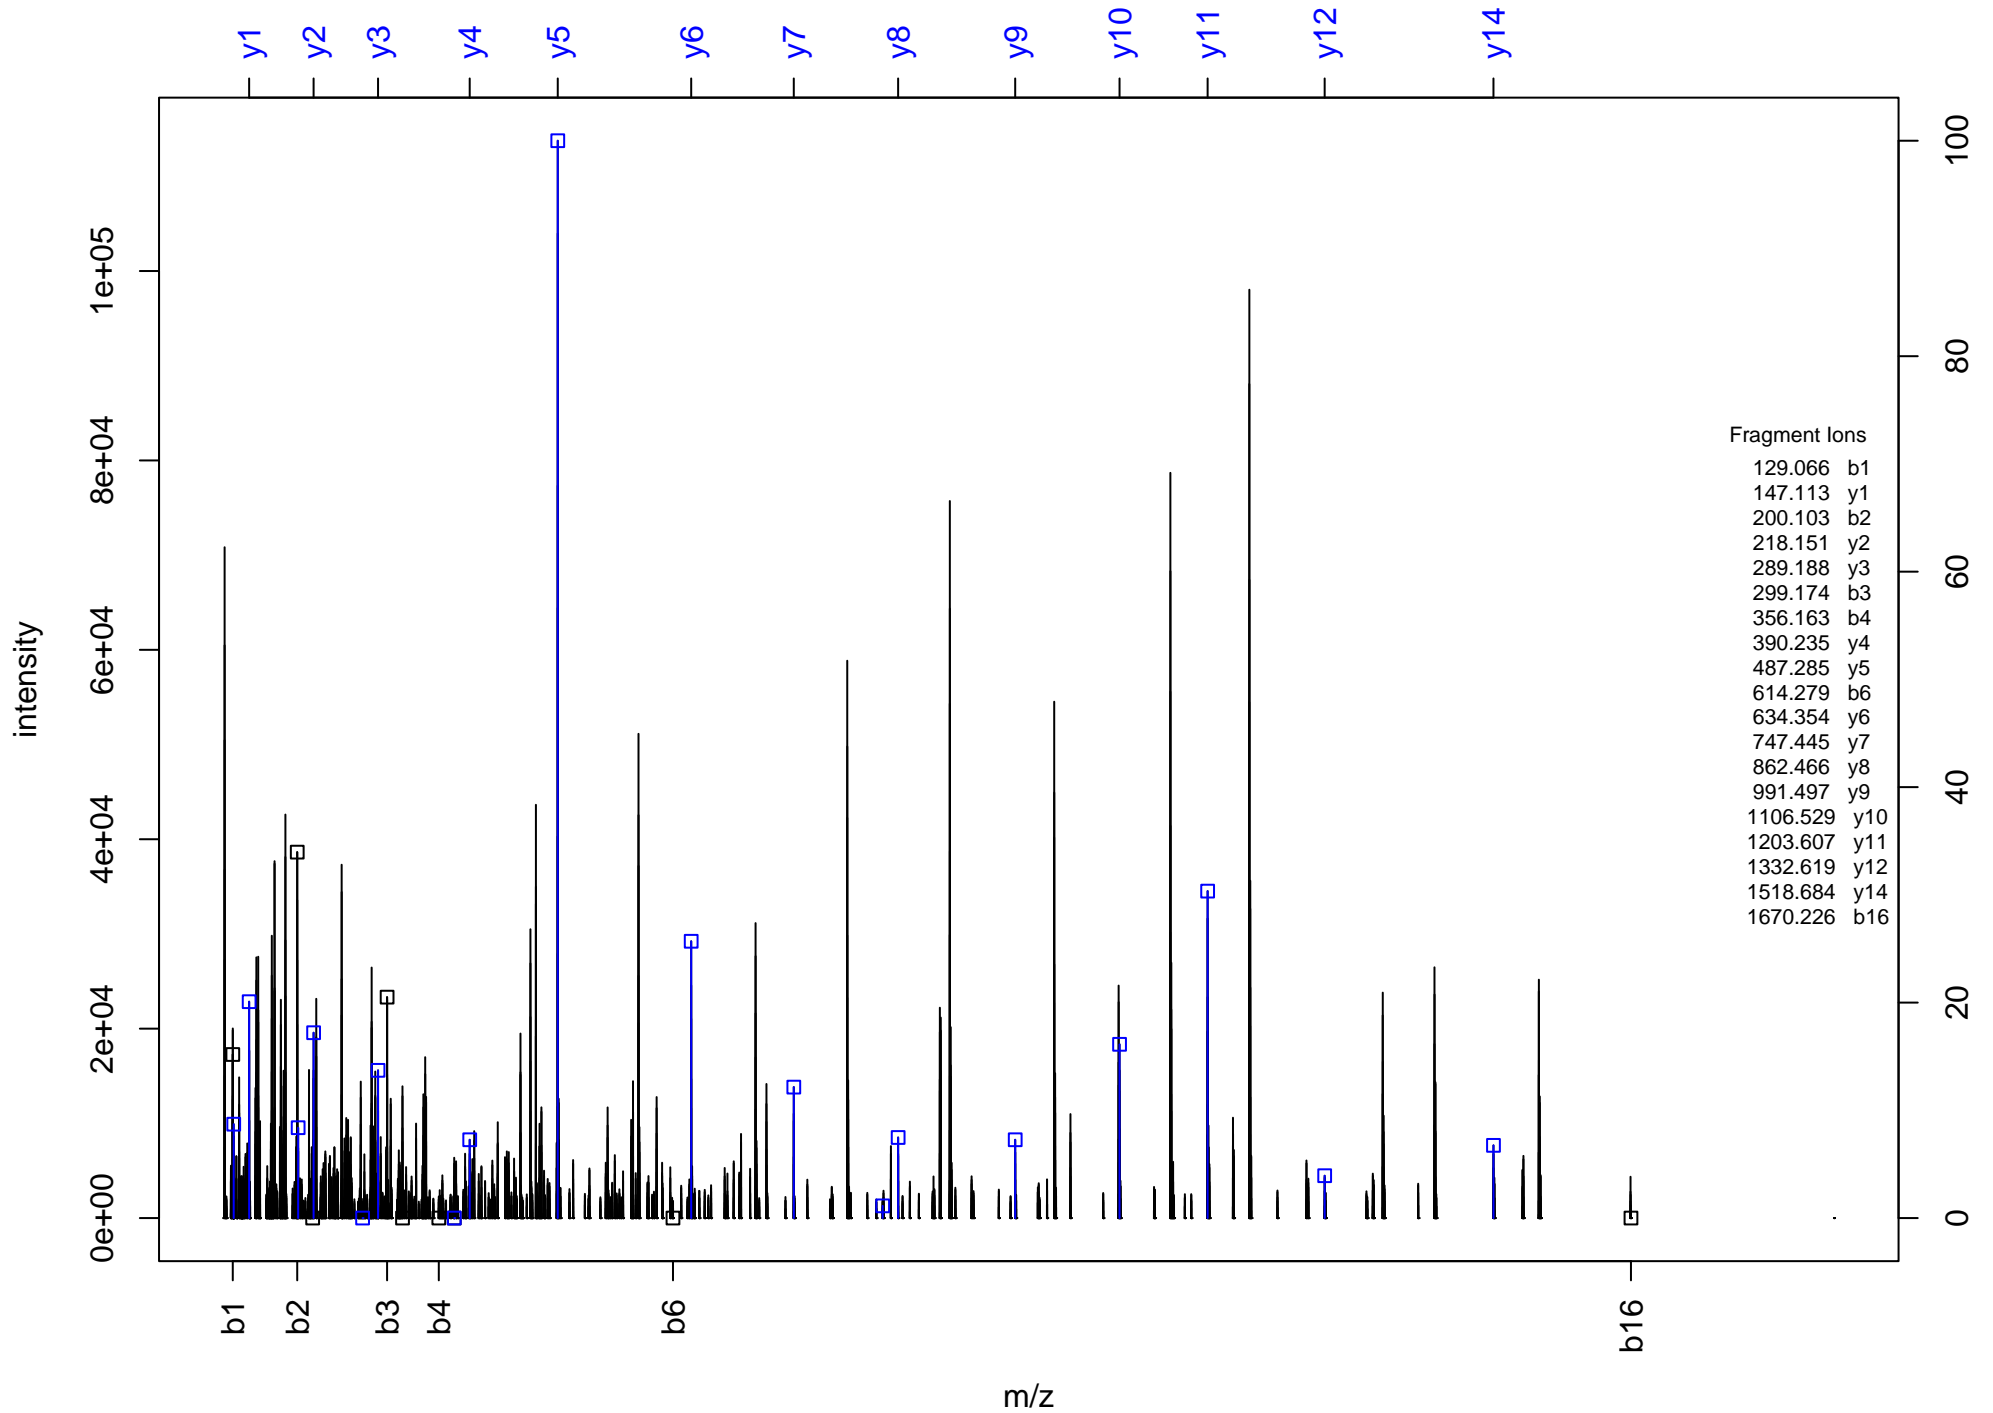

# FLVFDWNWR

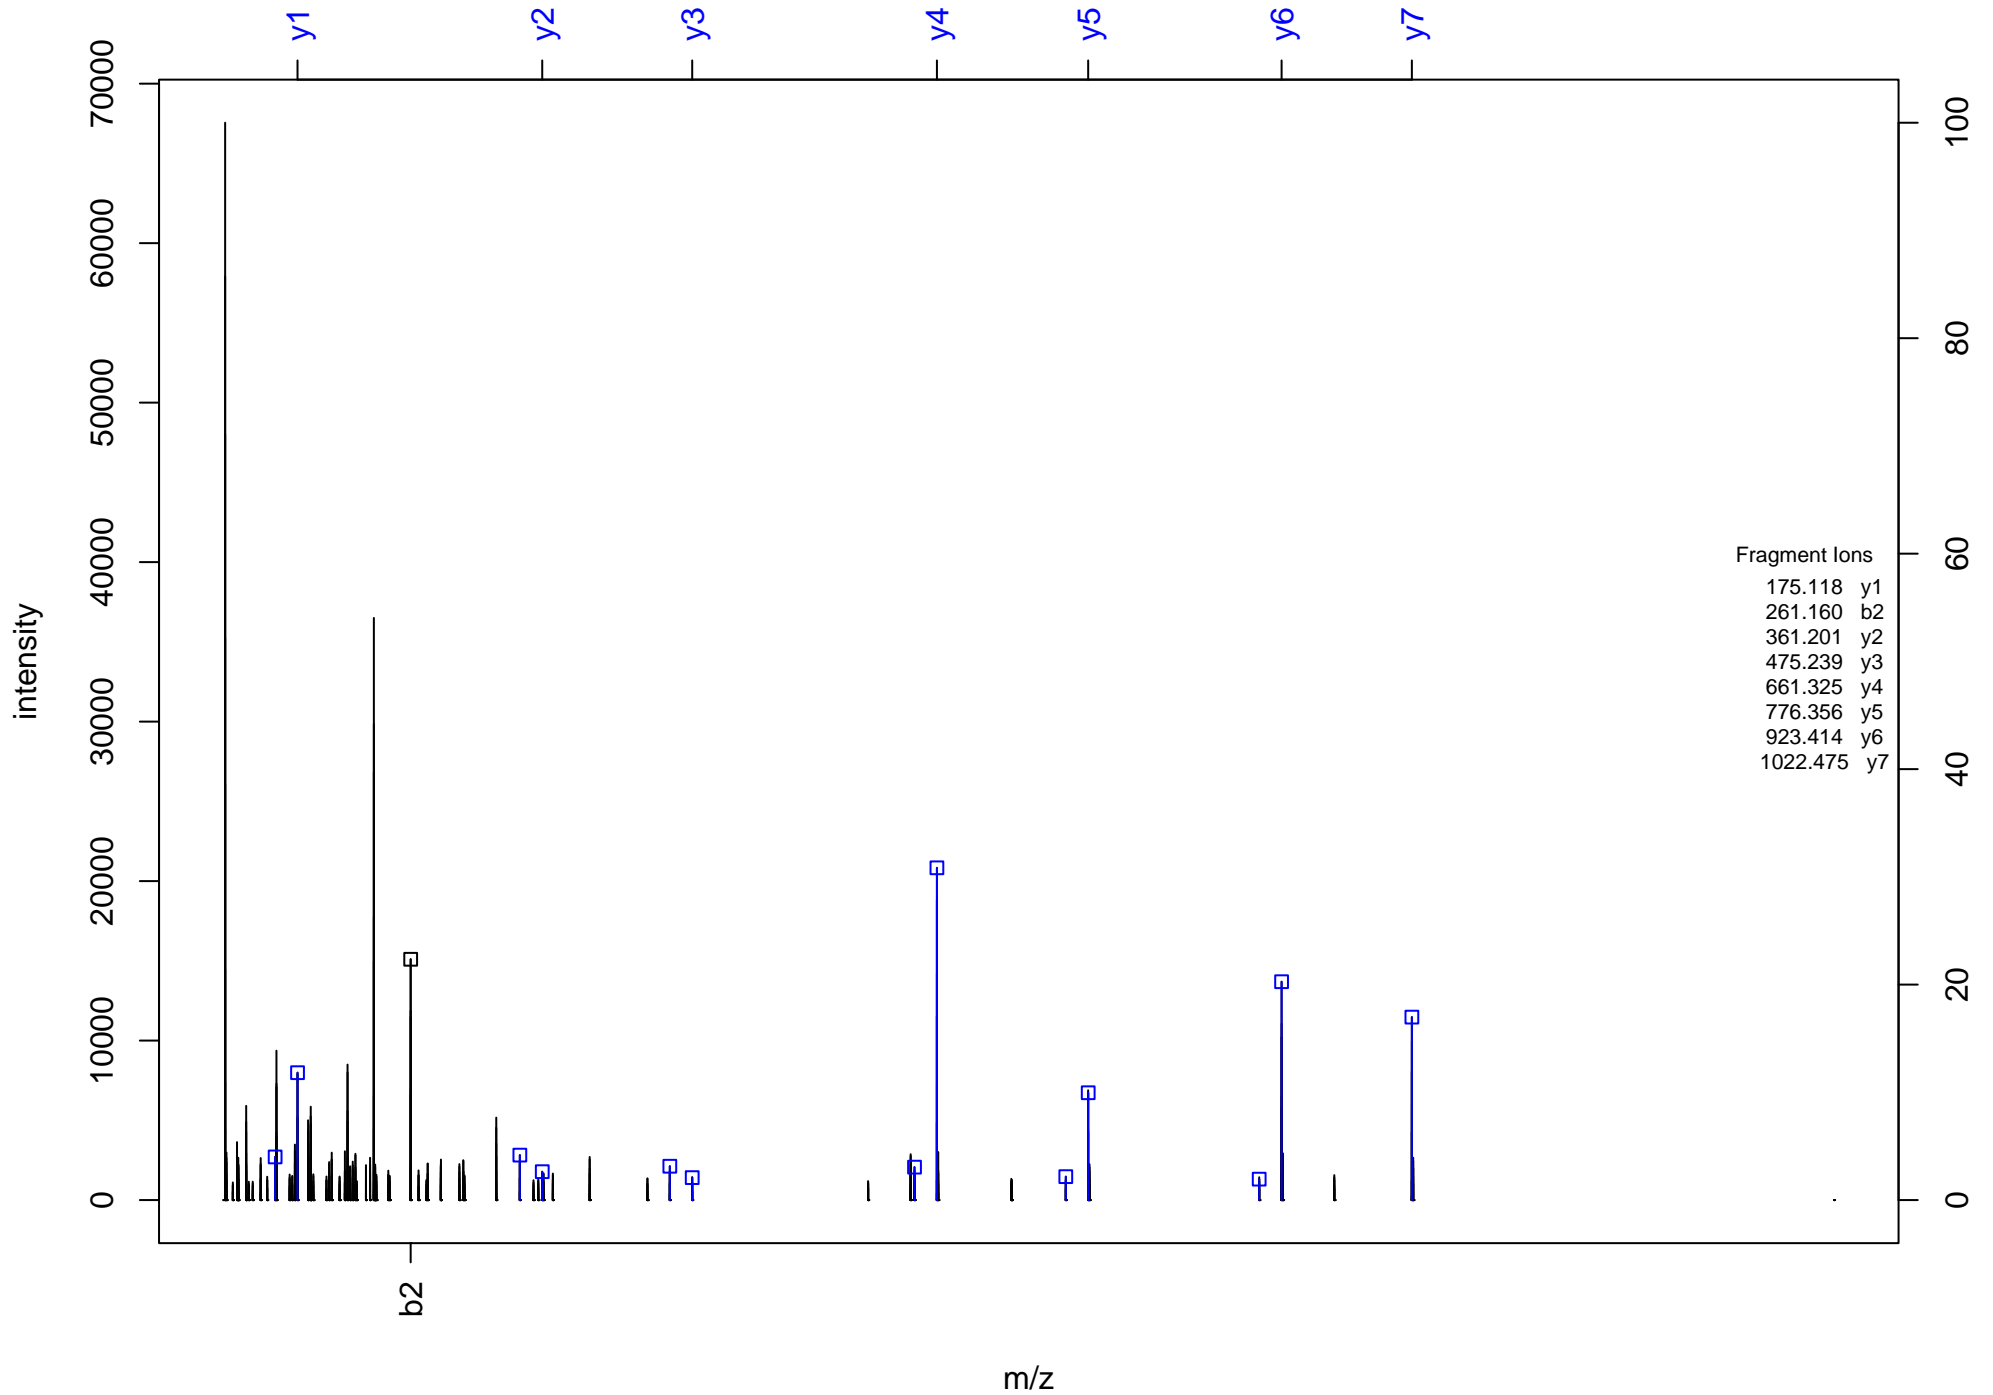



# SCQEGRPEDGESTAQWR

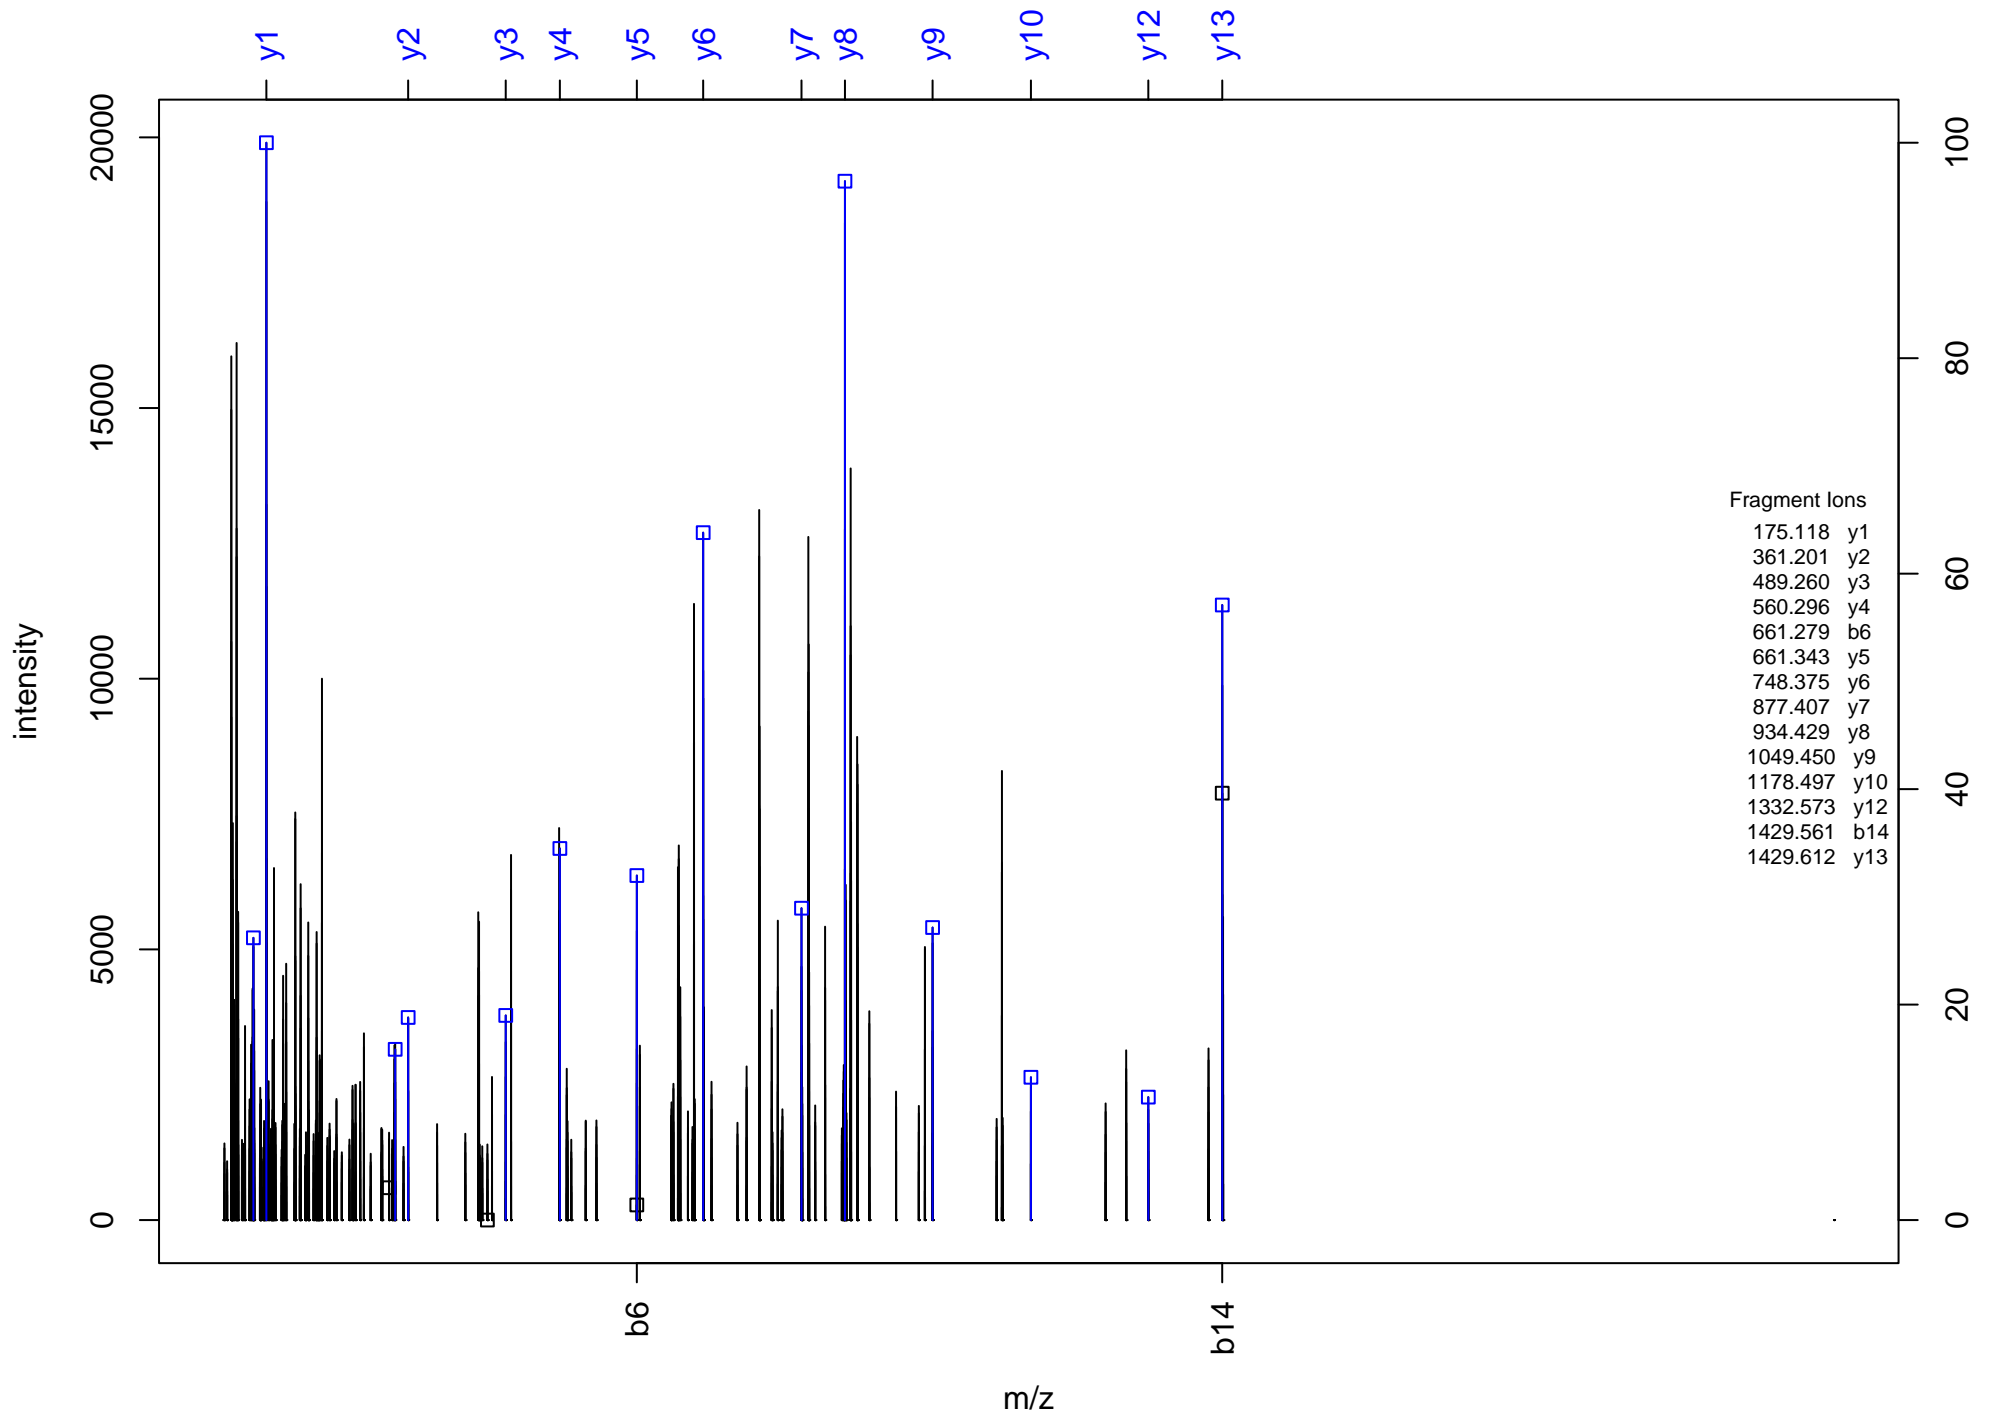

QHIAETESPYQELQGQRPEVYSDLNTQR

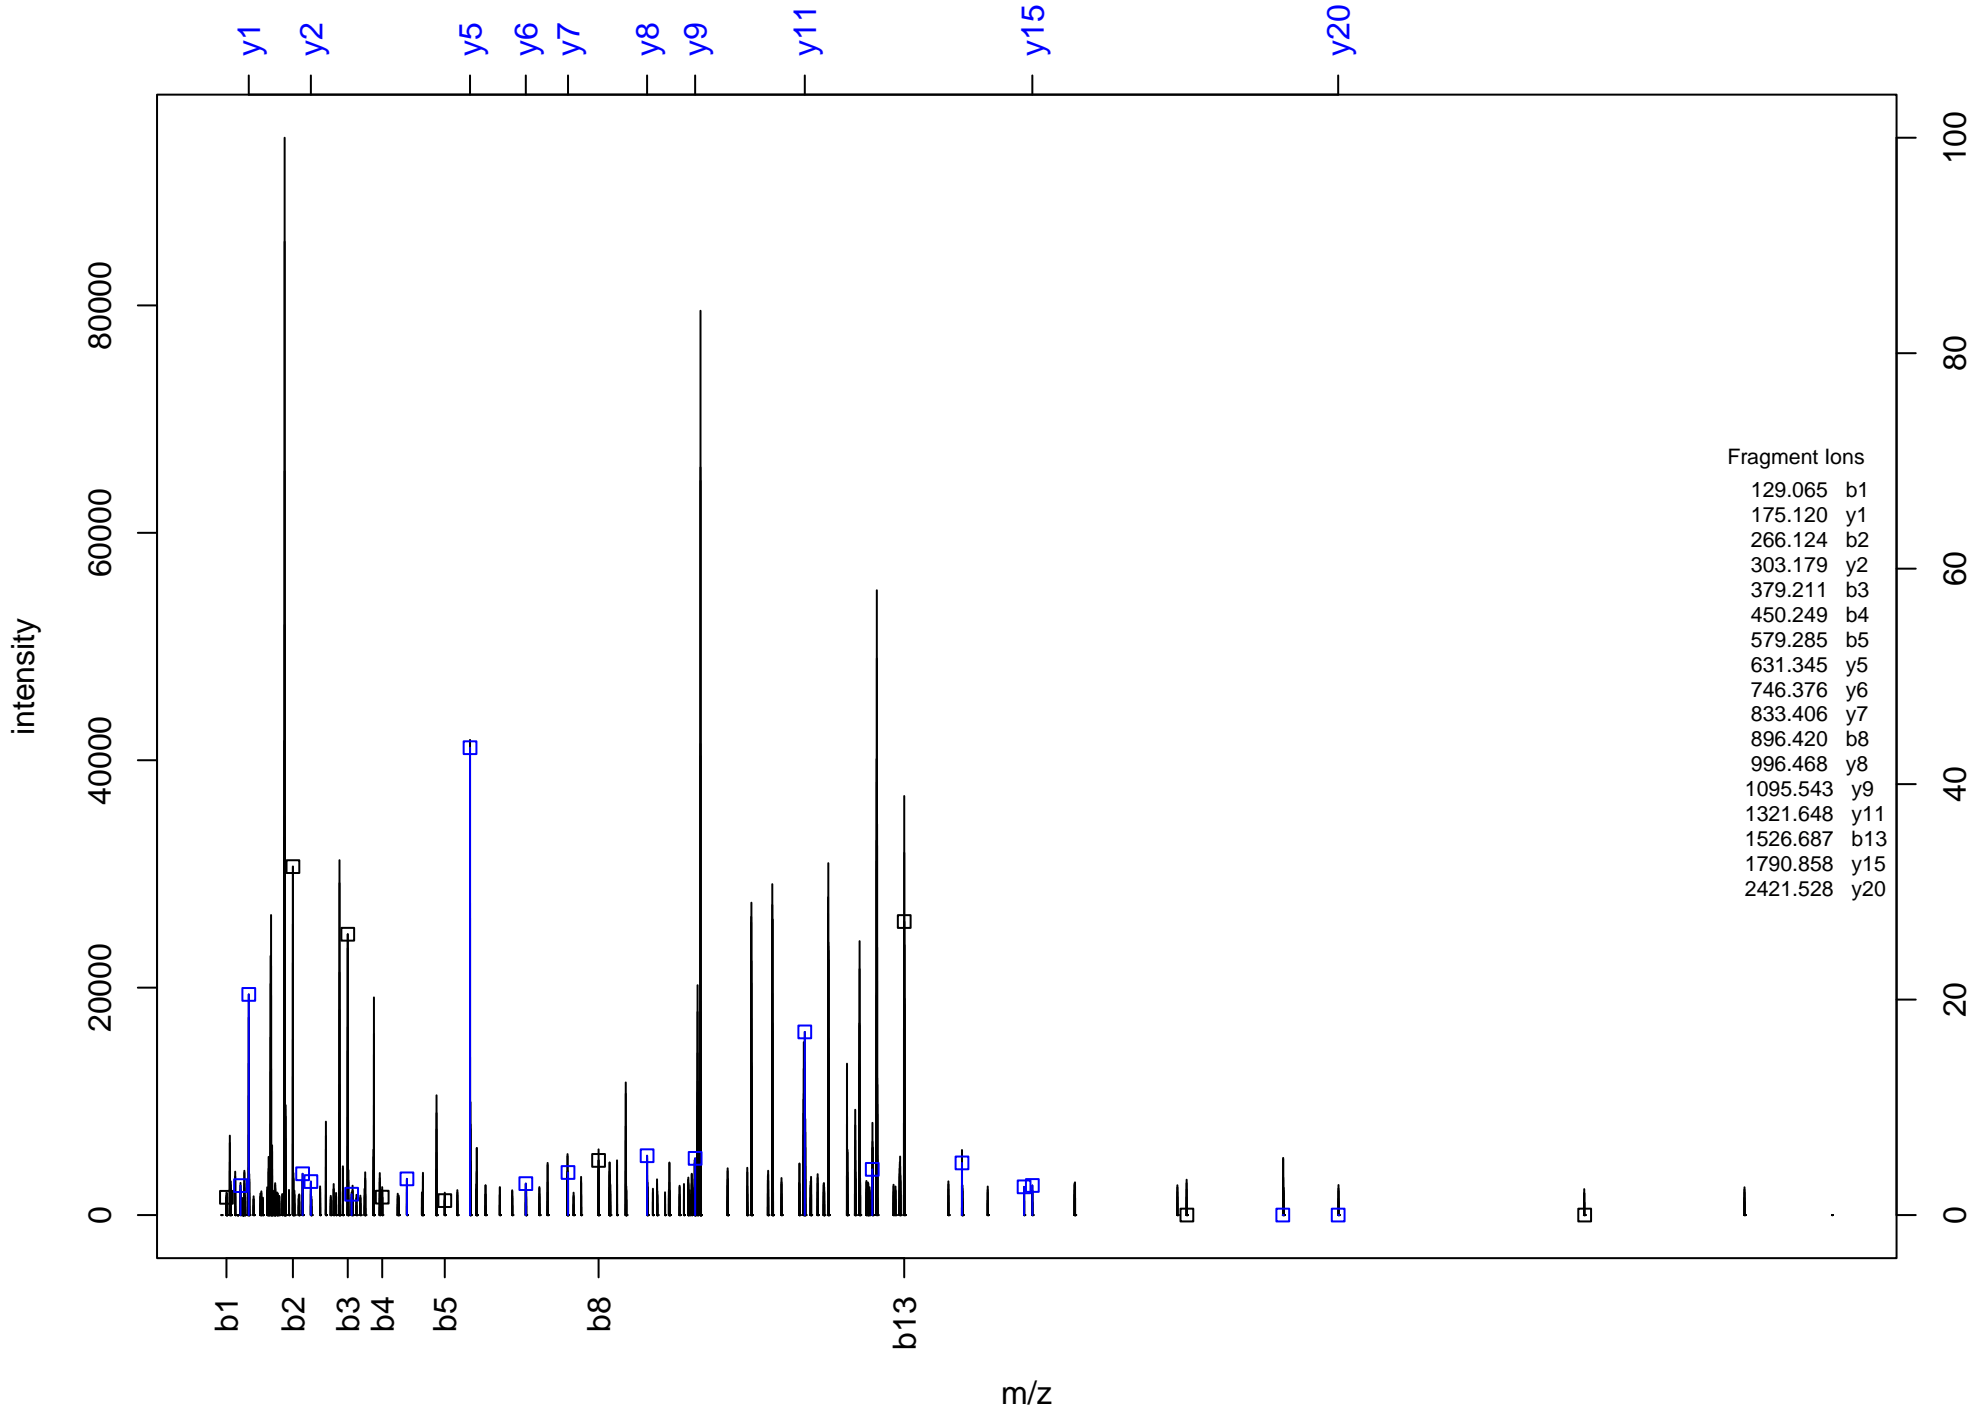

# FNQDPEAEDEGR

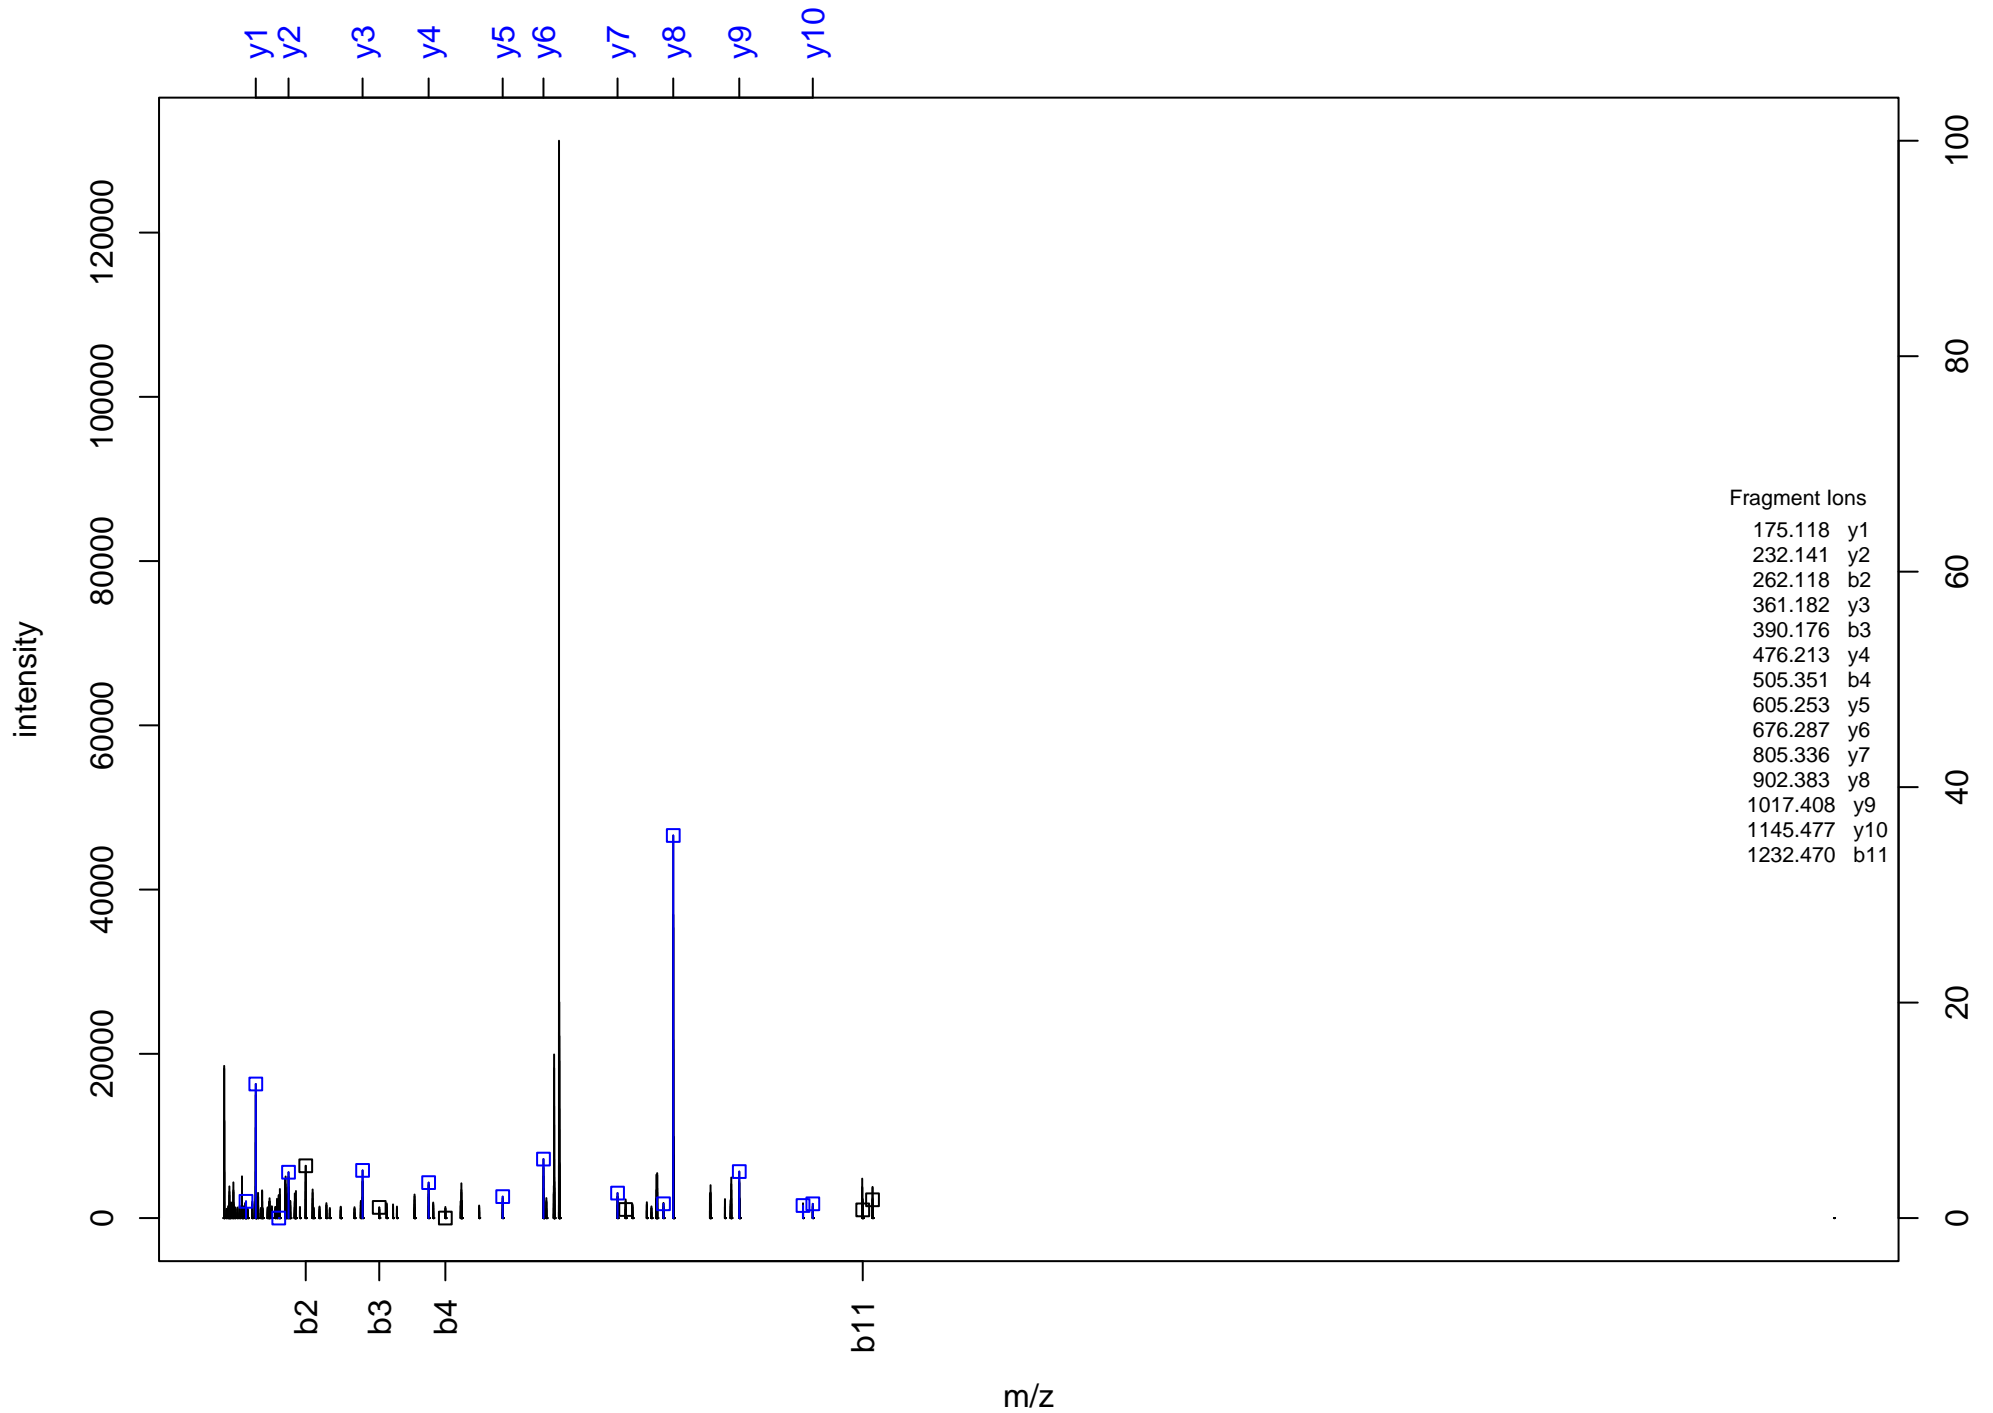

# (Ac)MDPNCSCSTGGSTCTSSCACK

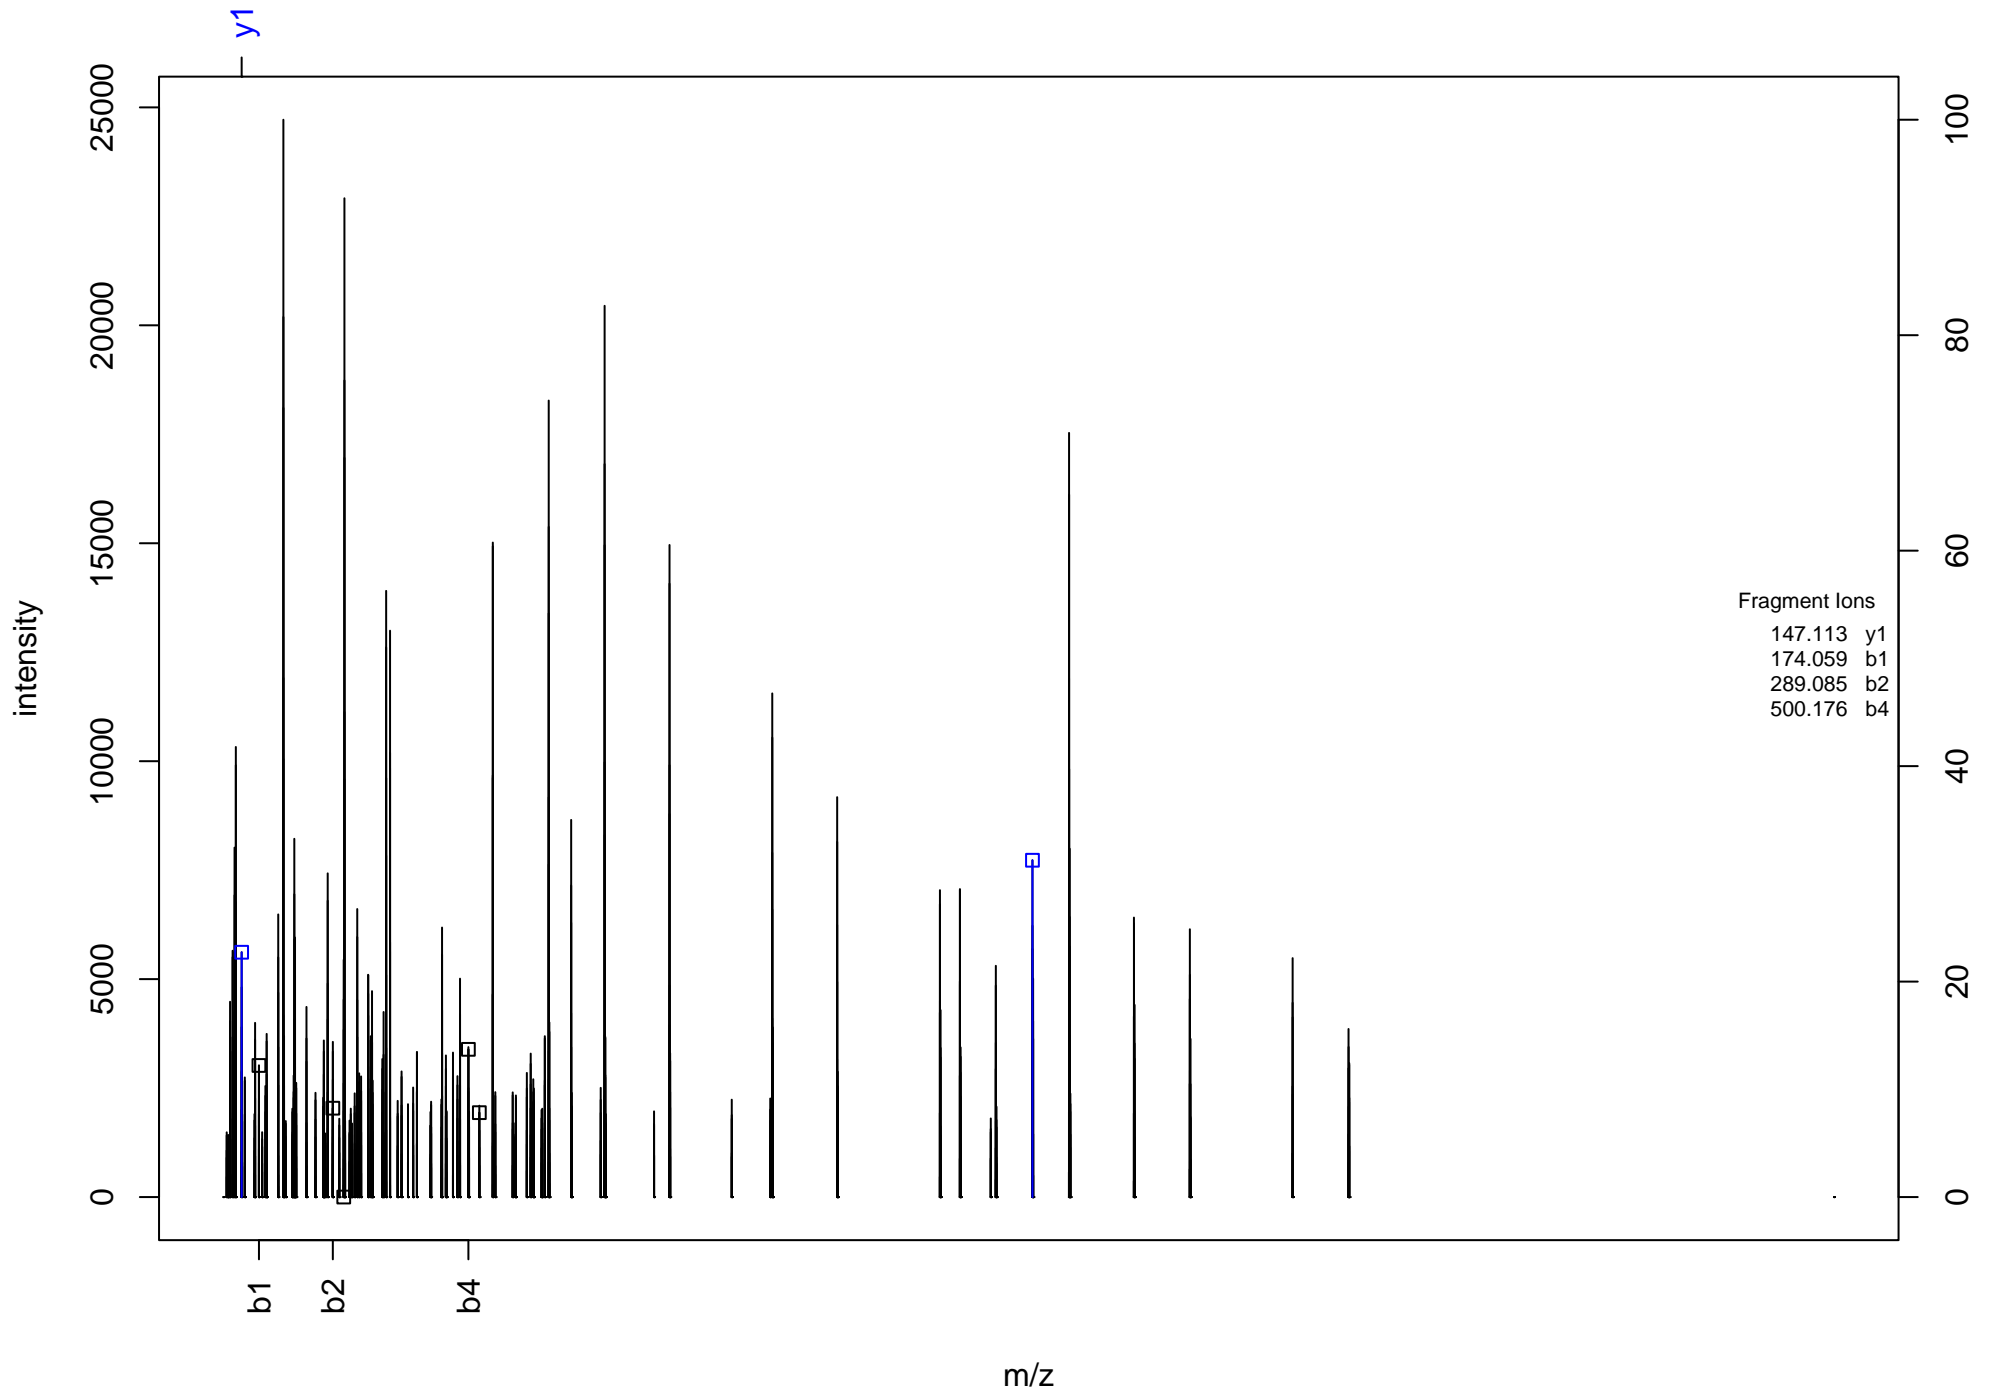

# ILGN<sup>+</sup>RVAELEK

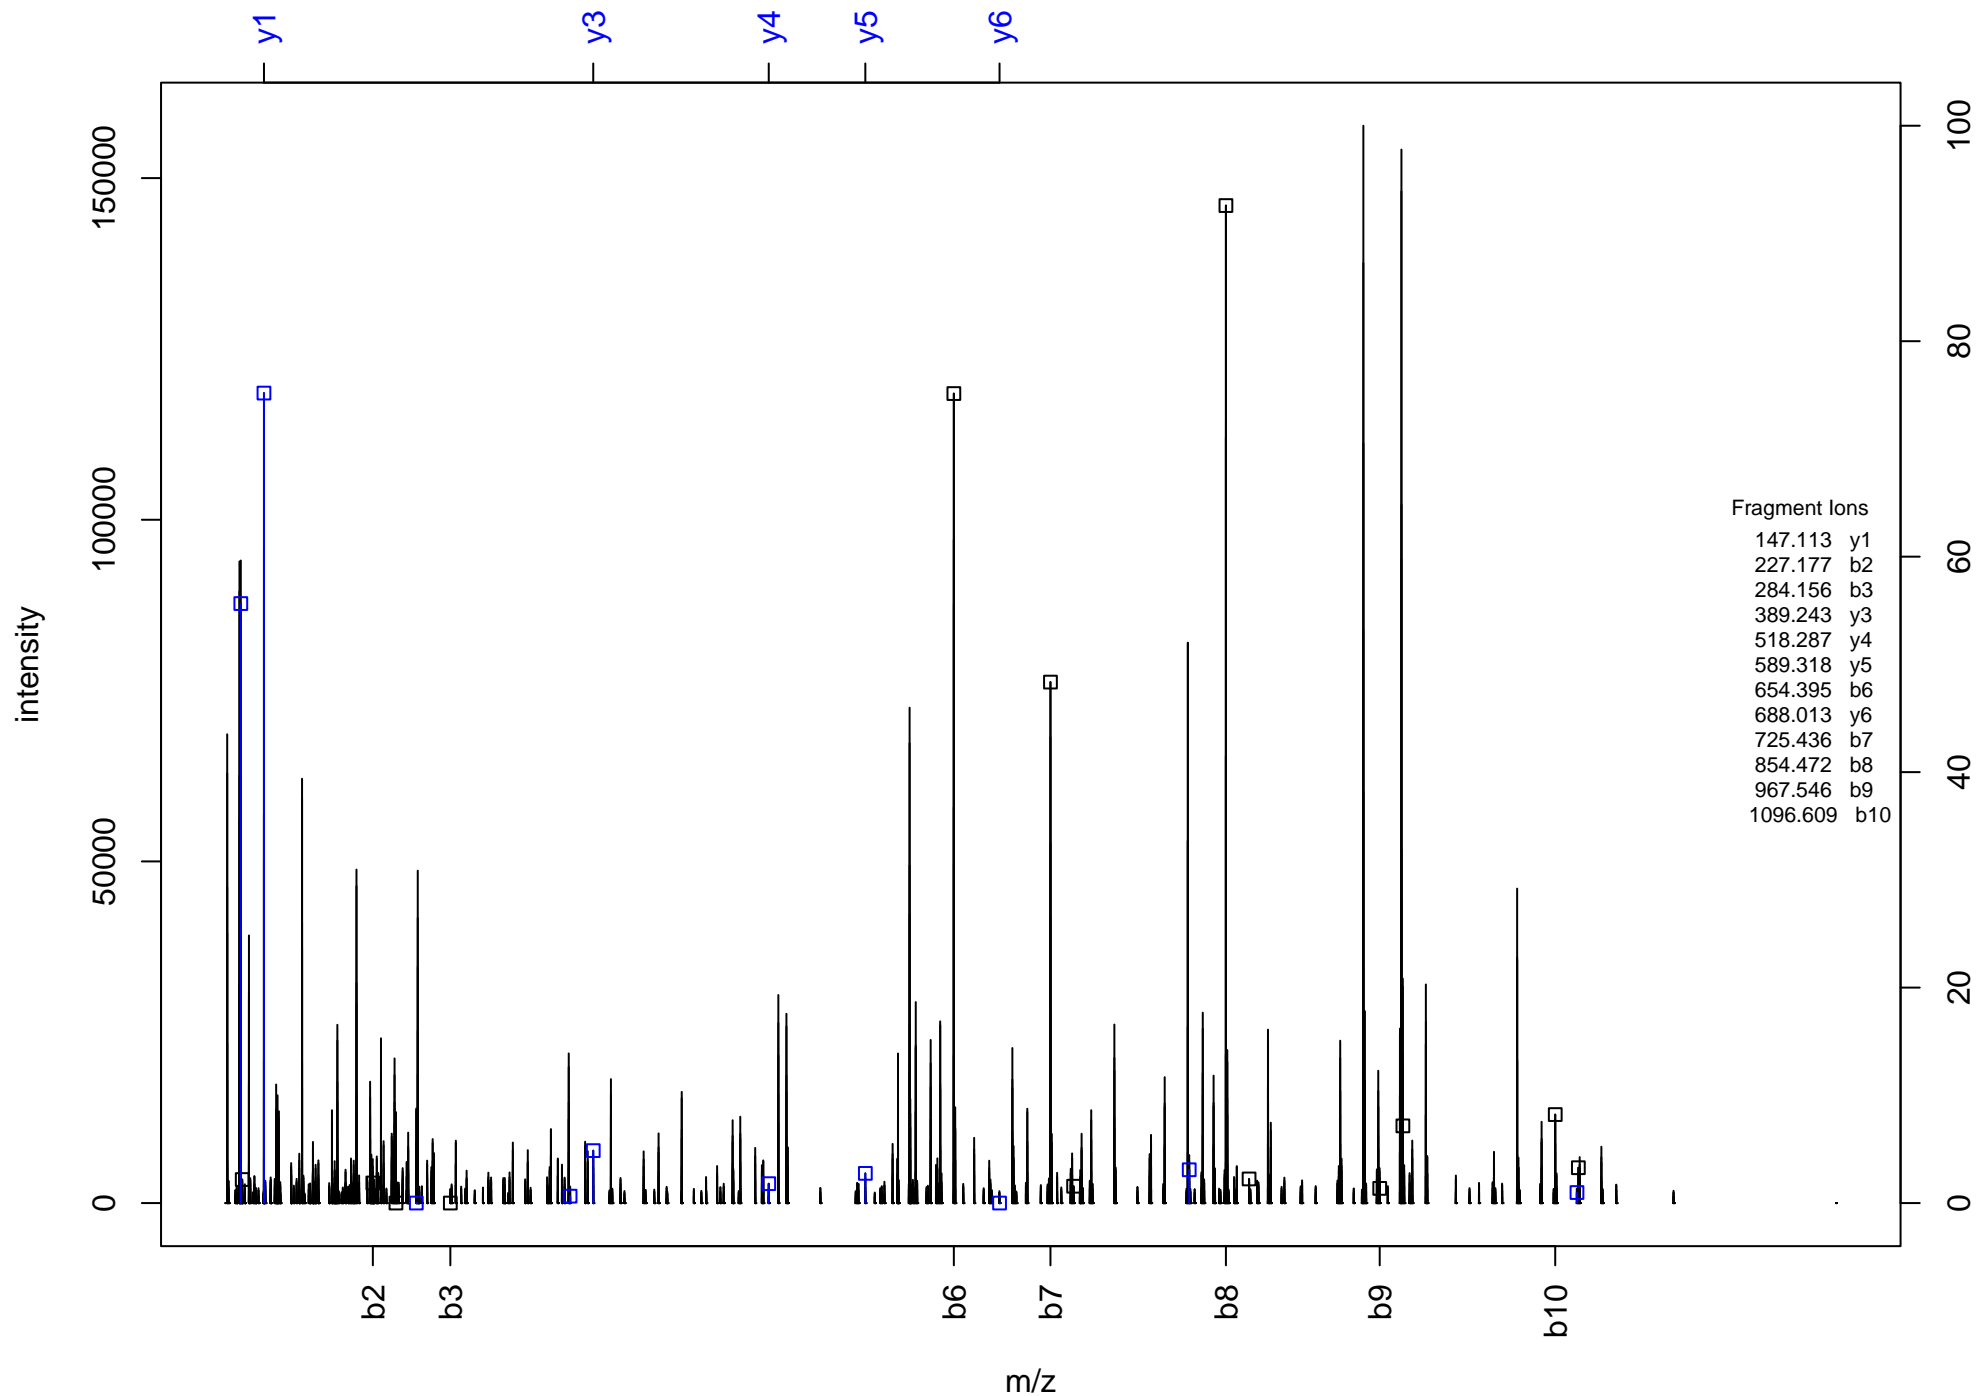

# M\*CITPGFYTVSVN^K

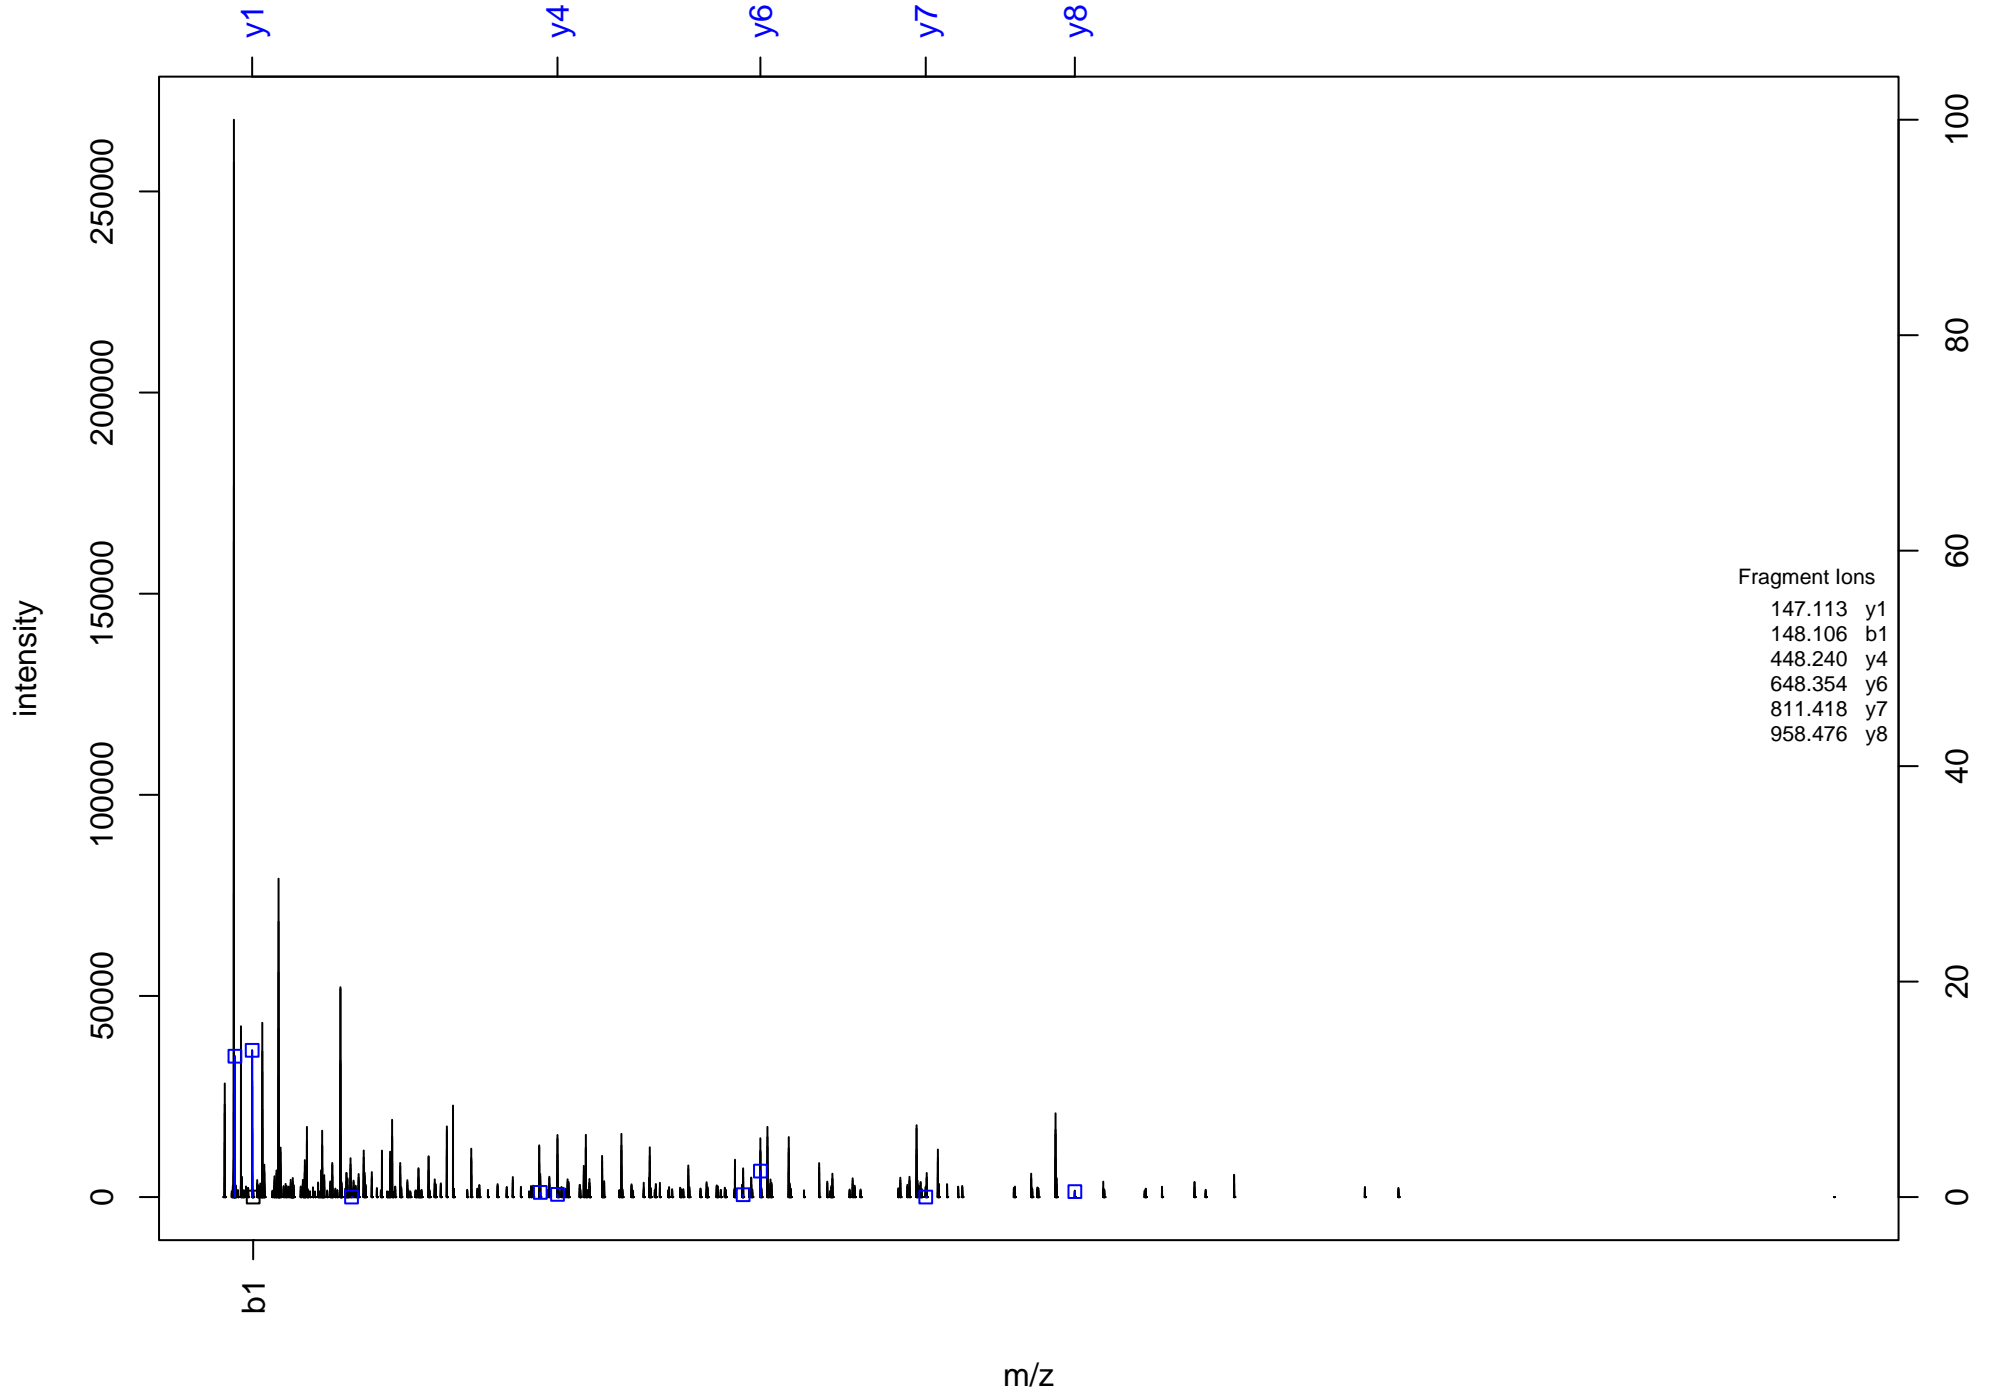

# VPFLPGDSDLQLTR

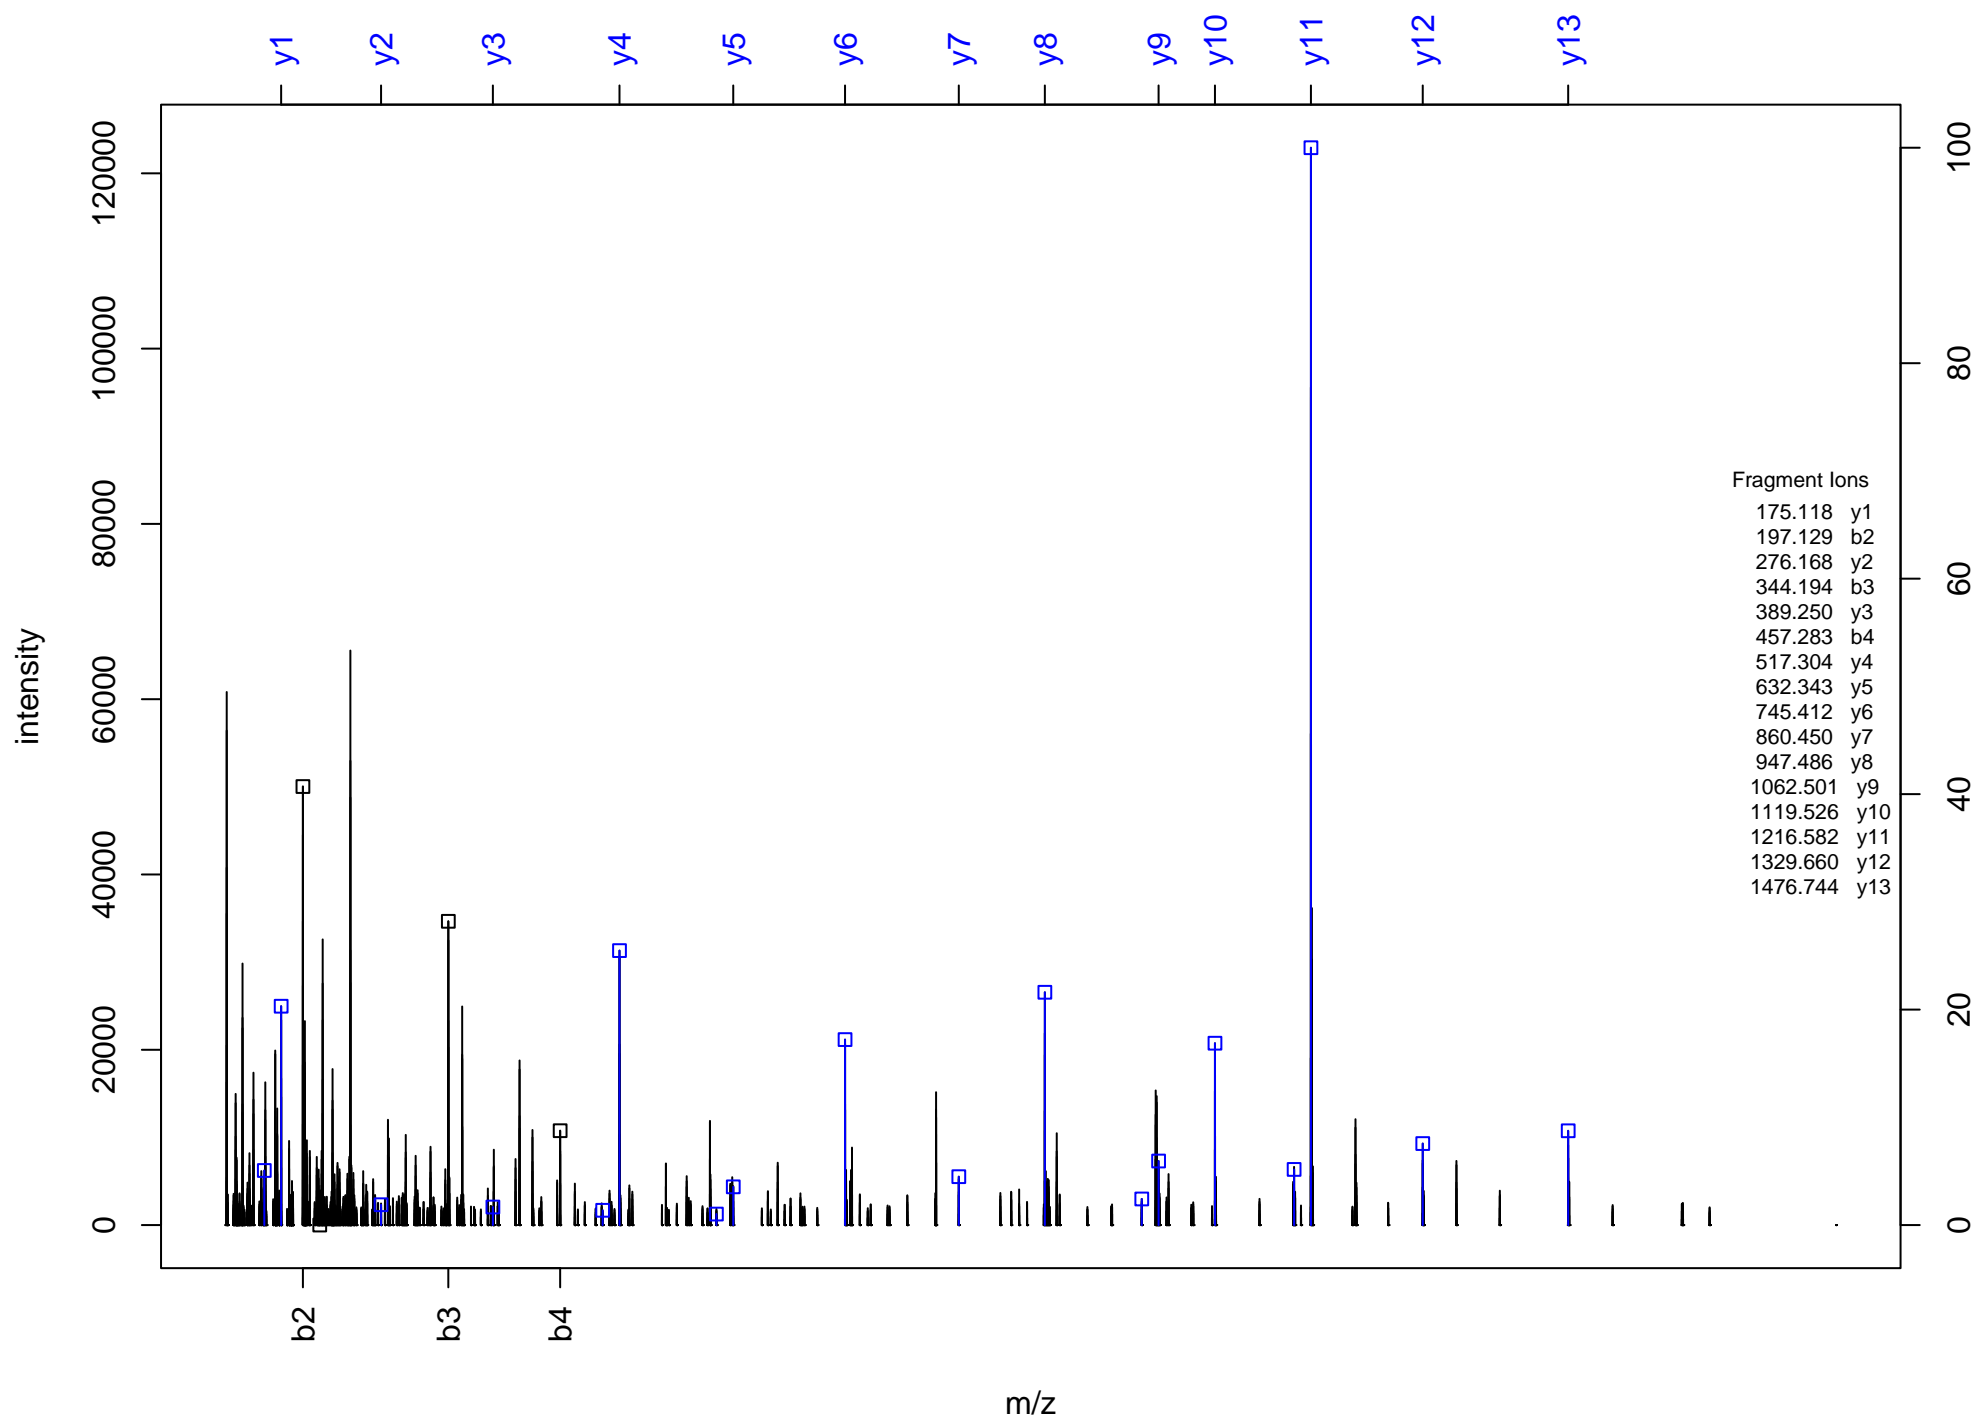

# DVAVSEEVGQAACEAR

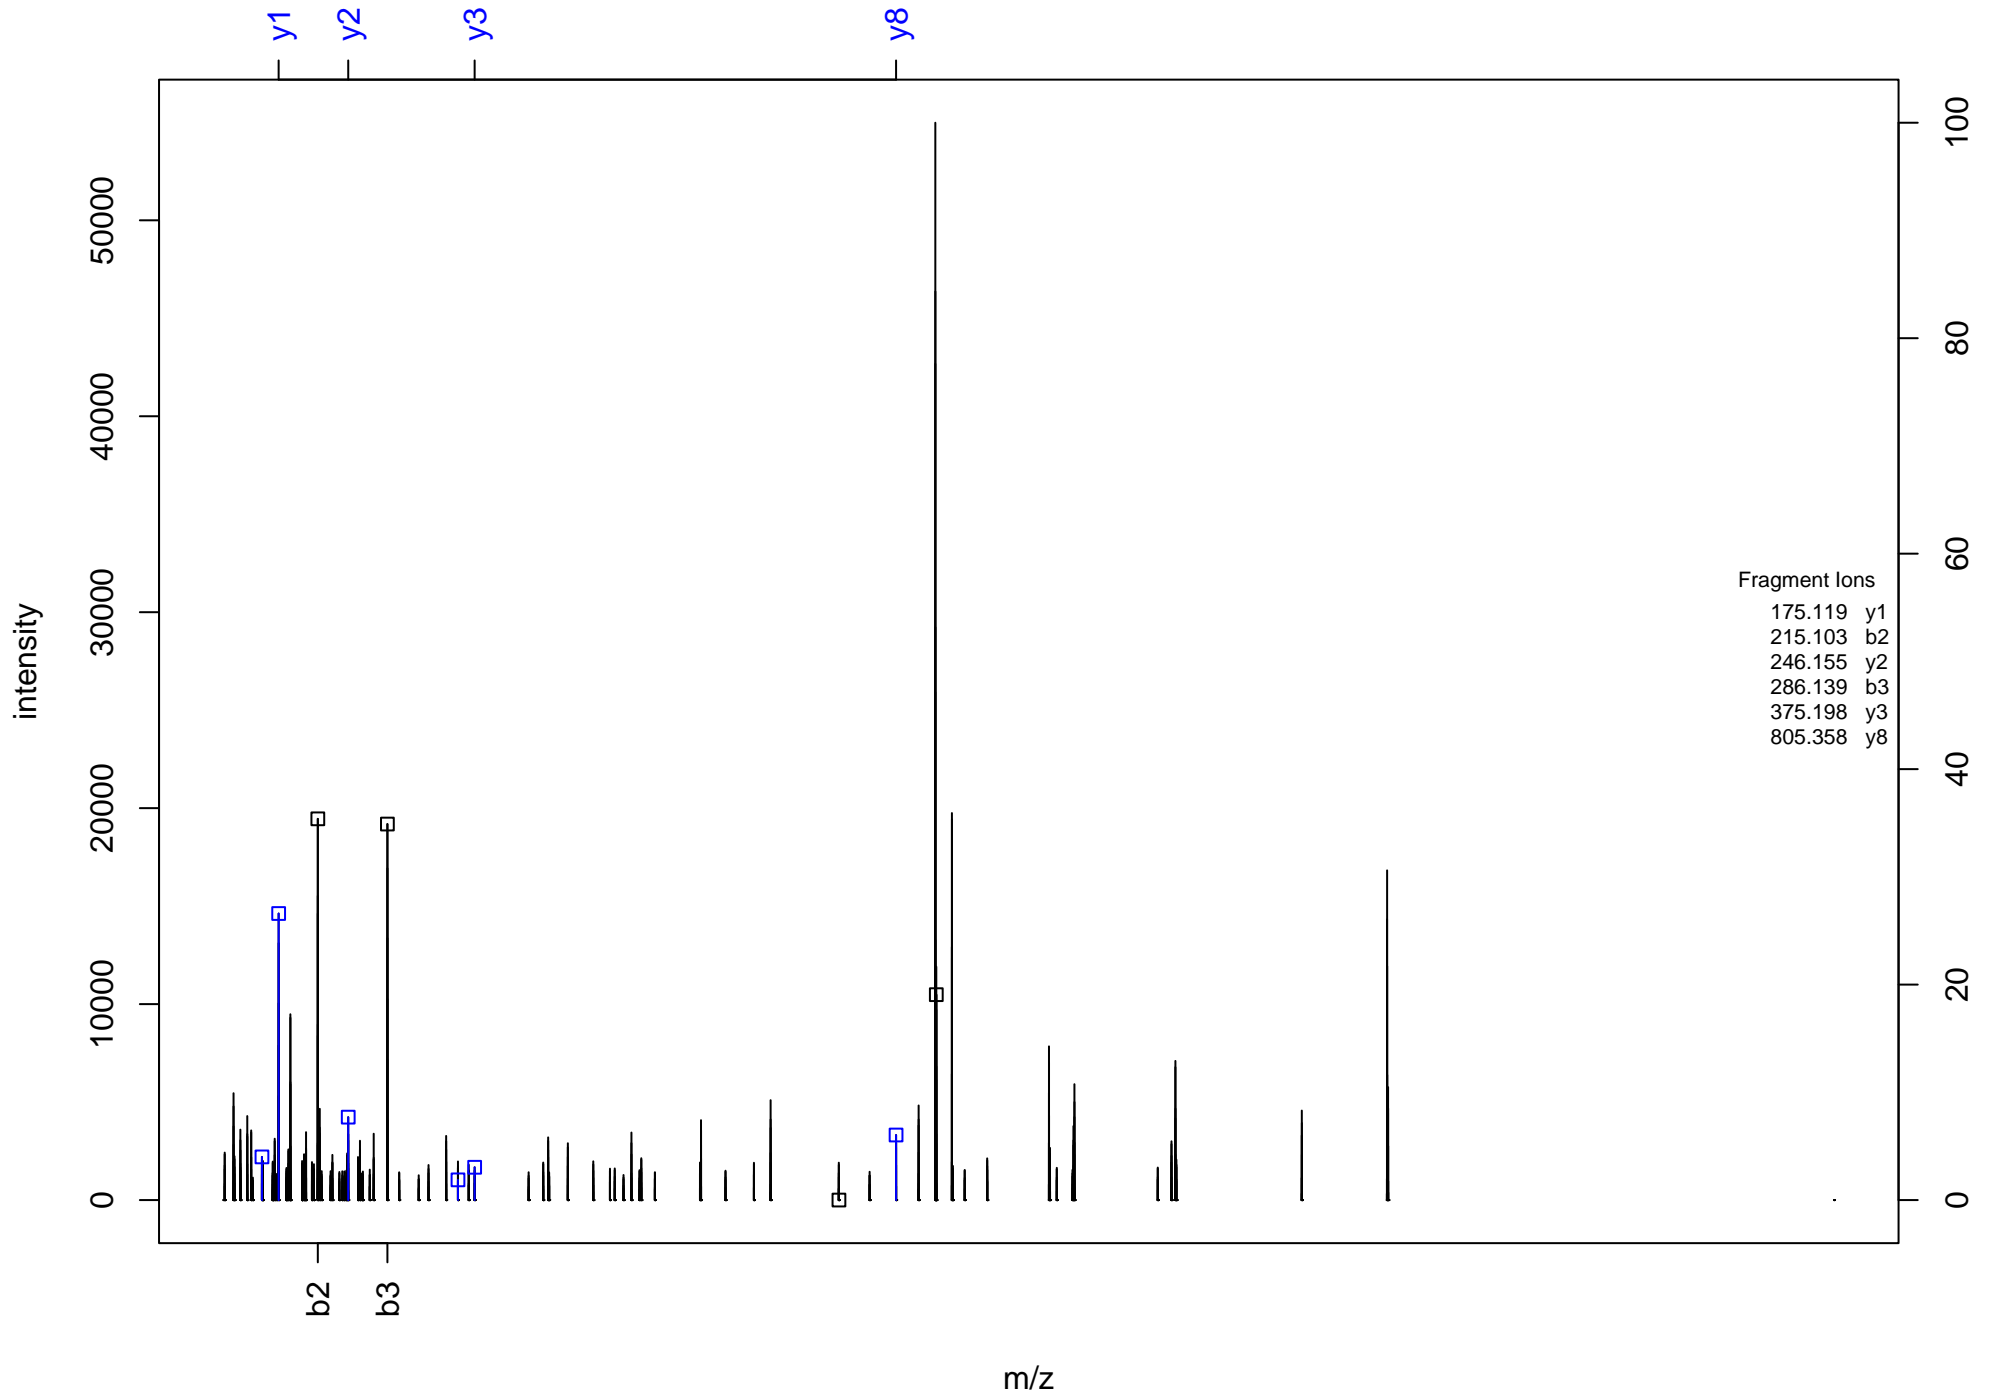



# EVN^RLSDFEM\*ESK

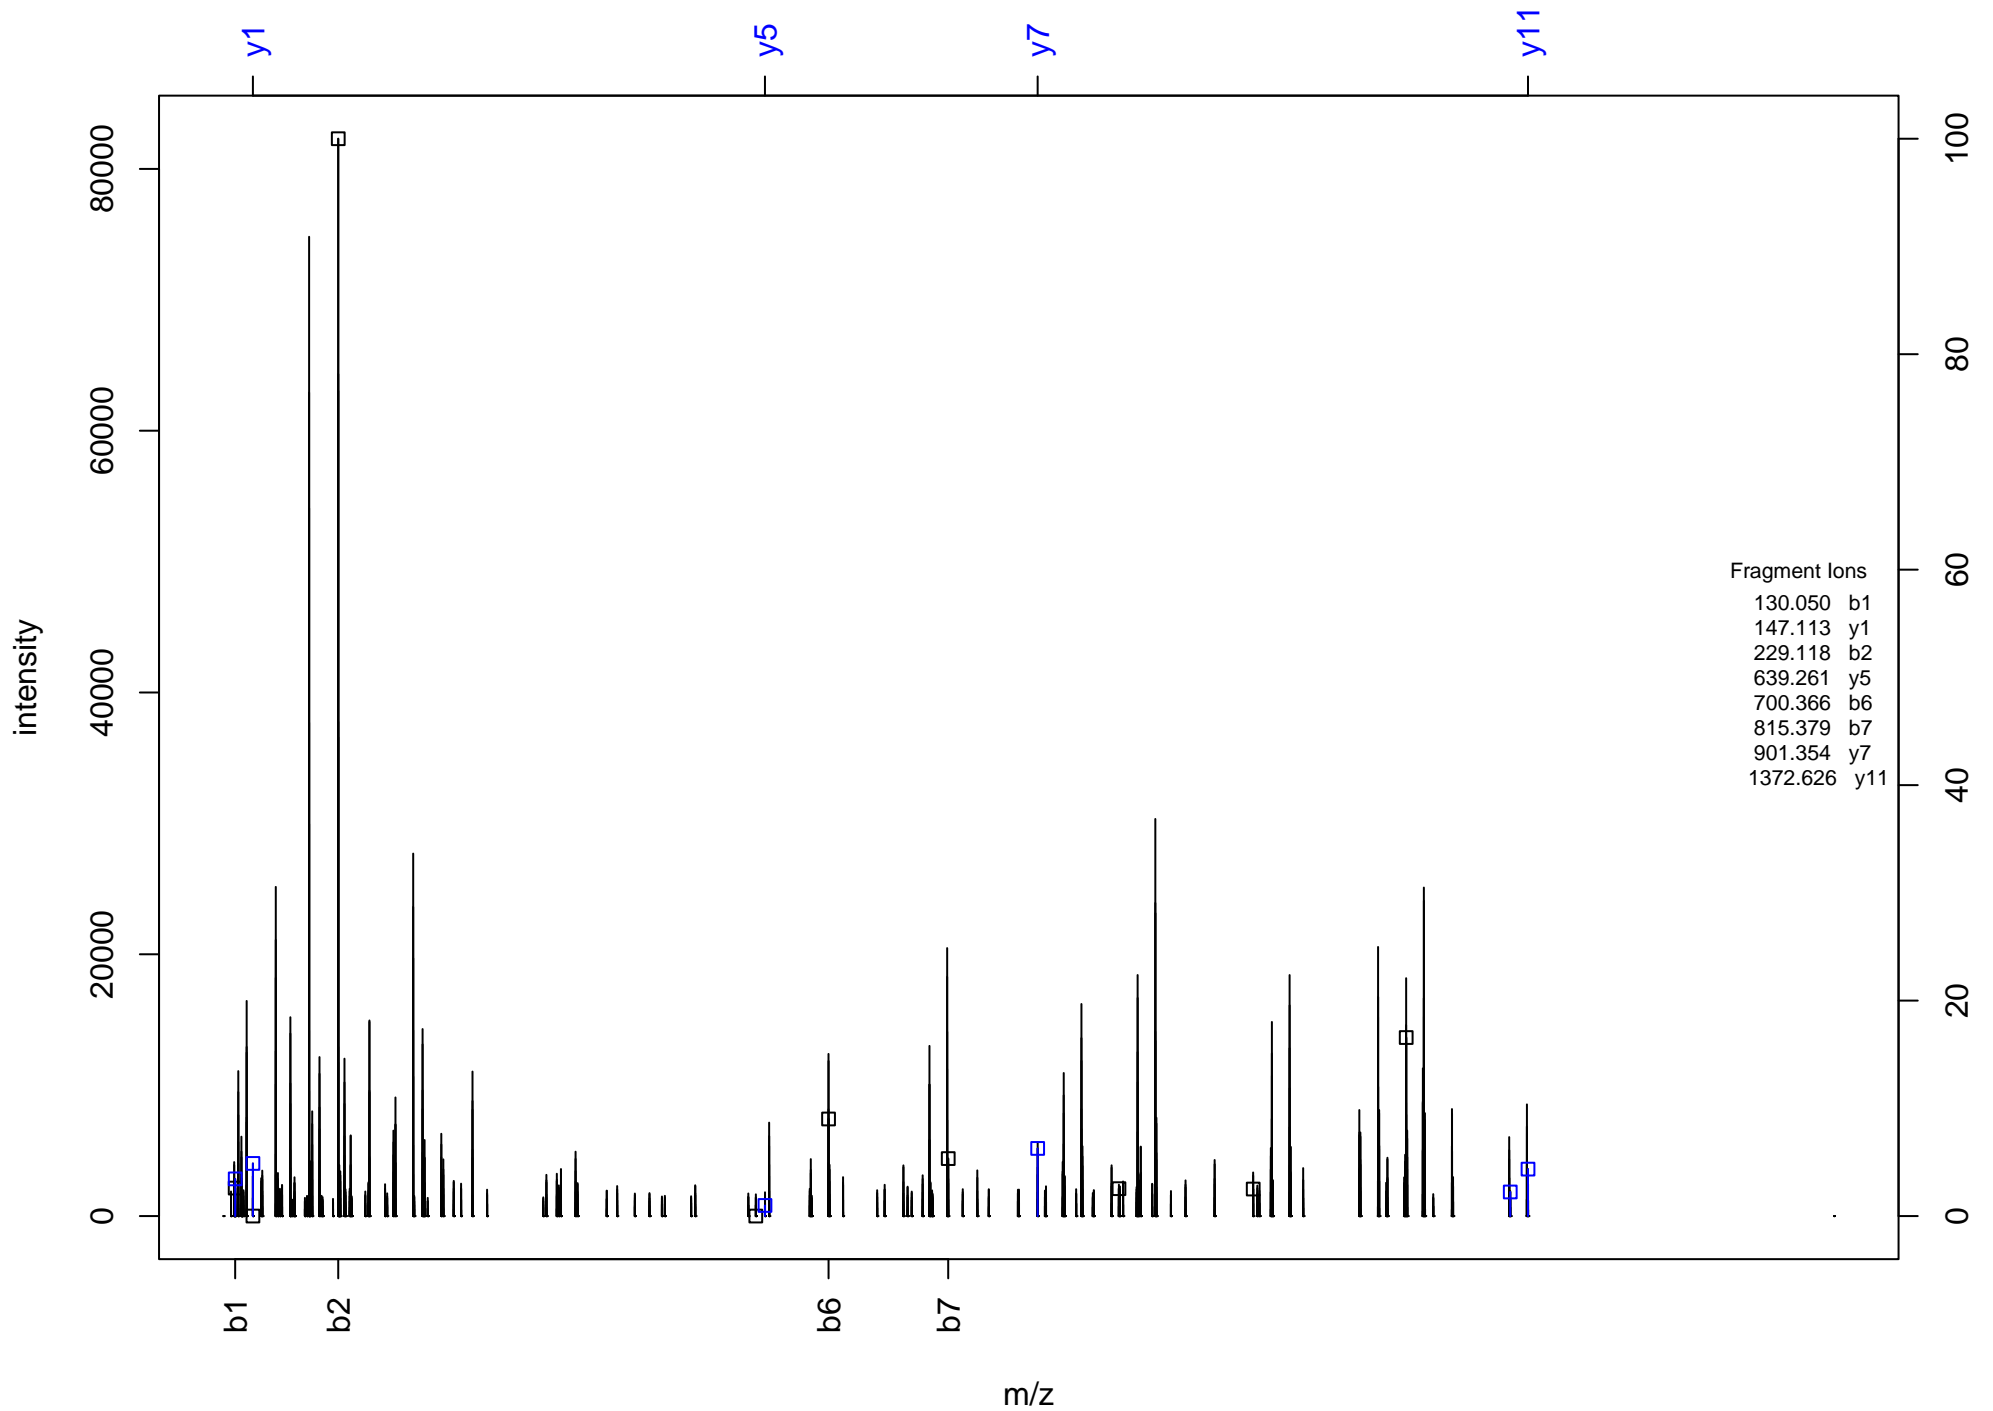

# AQSQEDSDYINANYIR

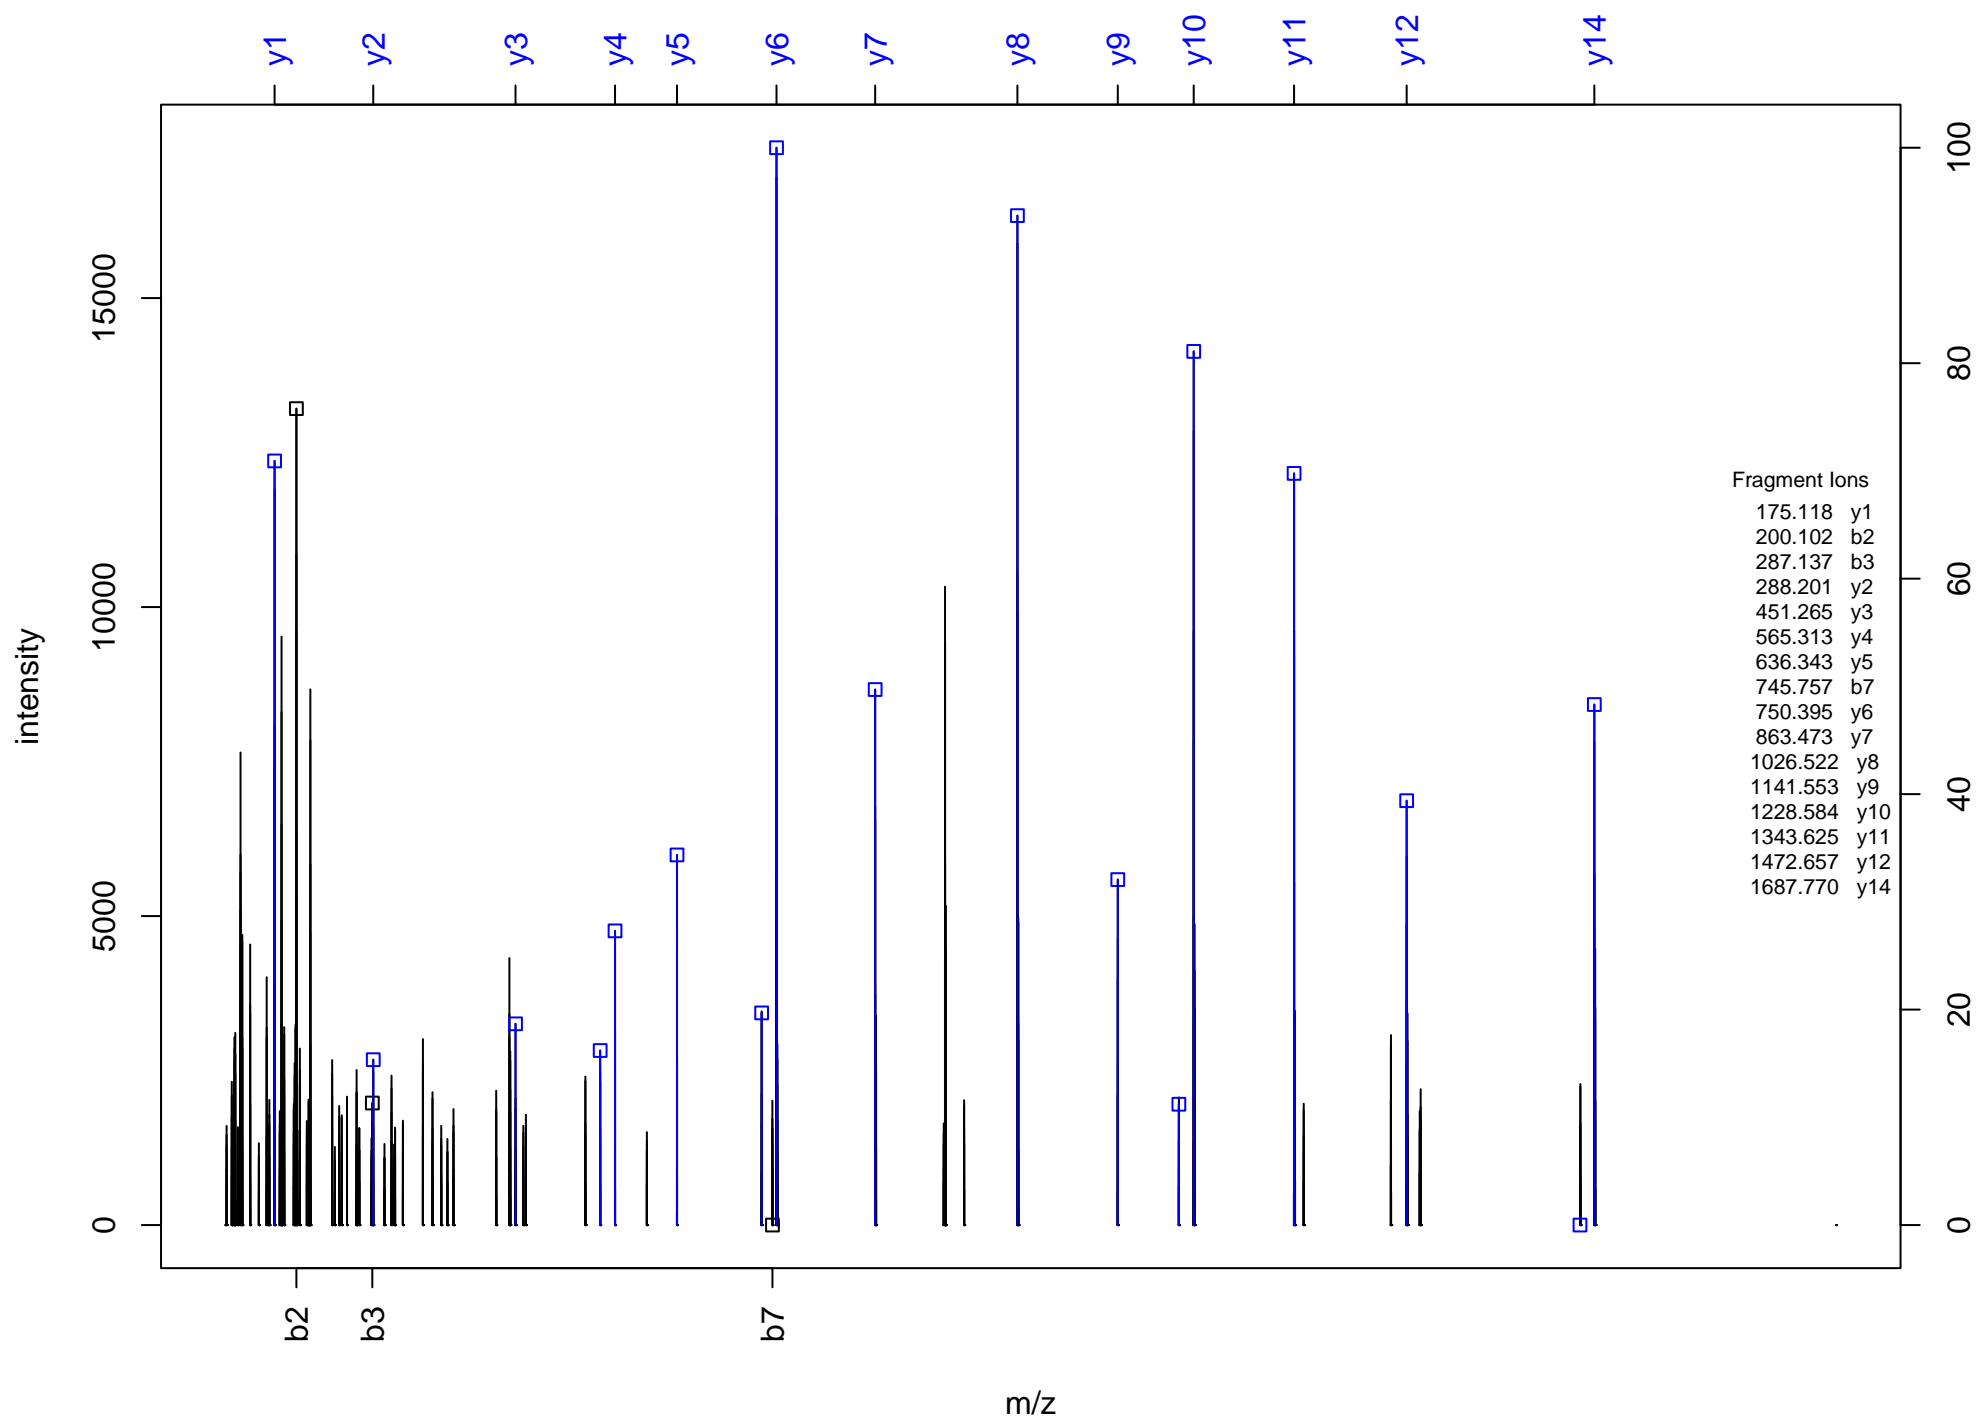

# FVFEVIPASSDQNR

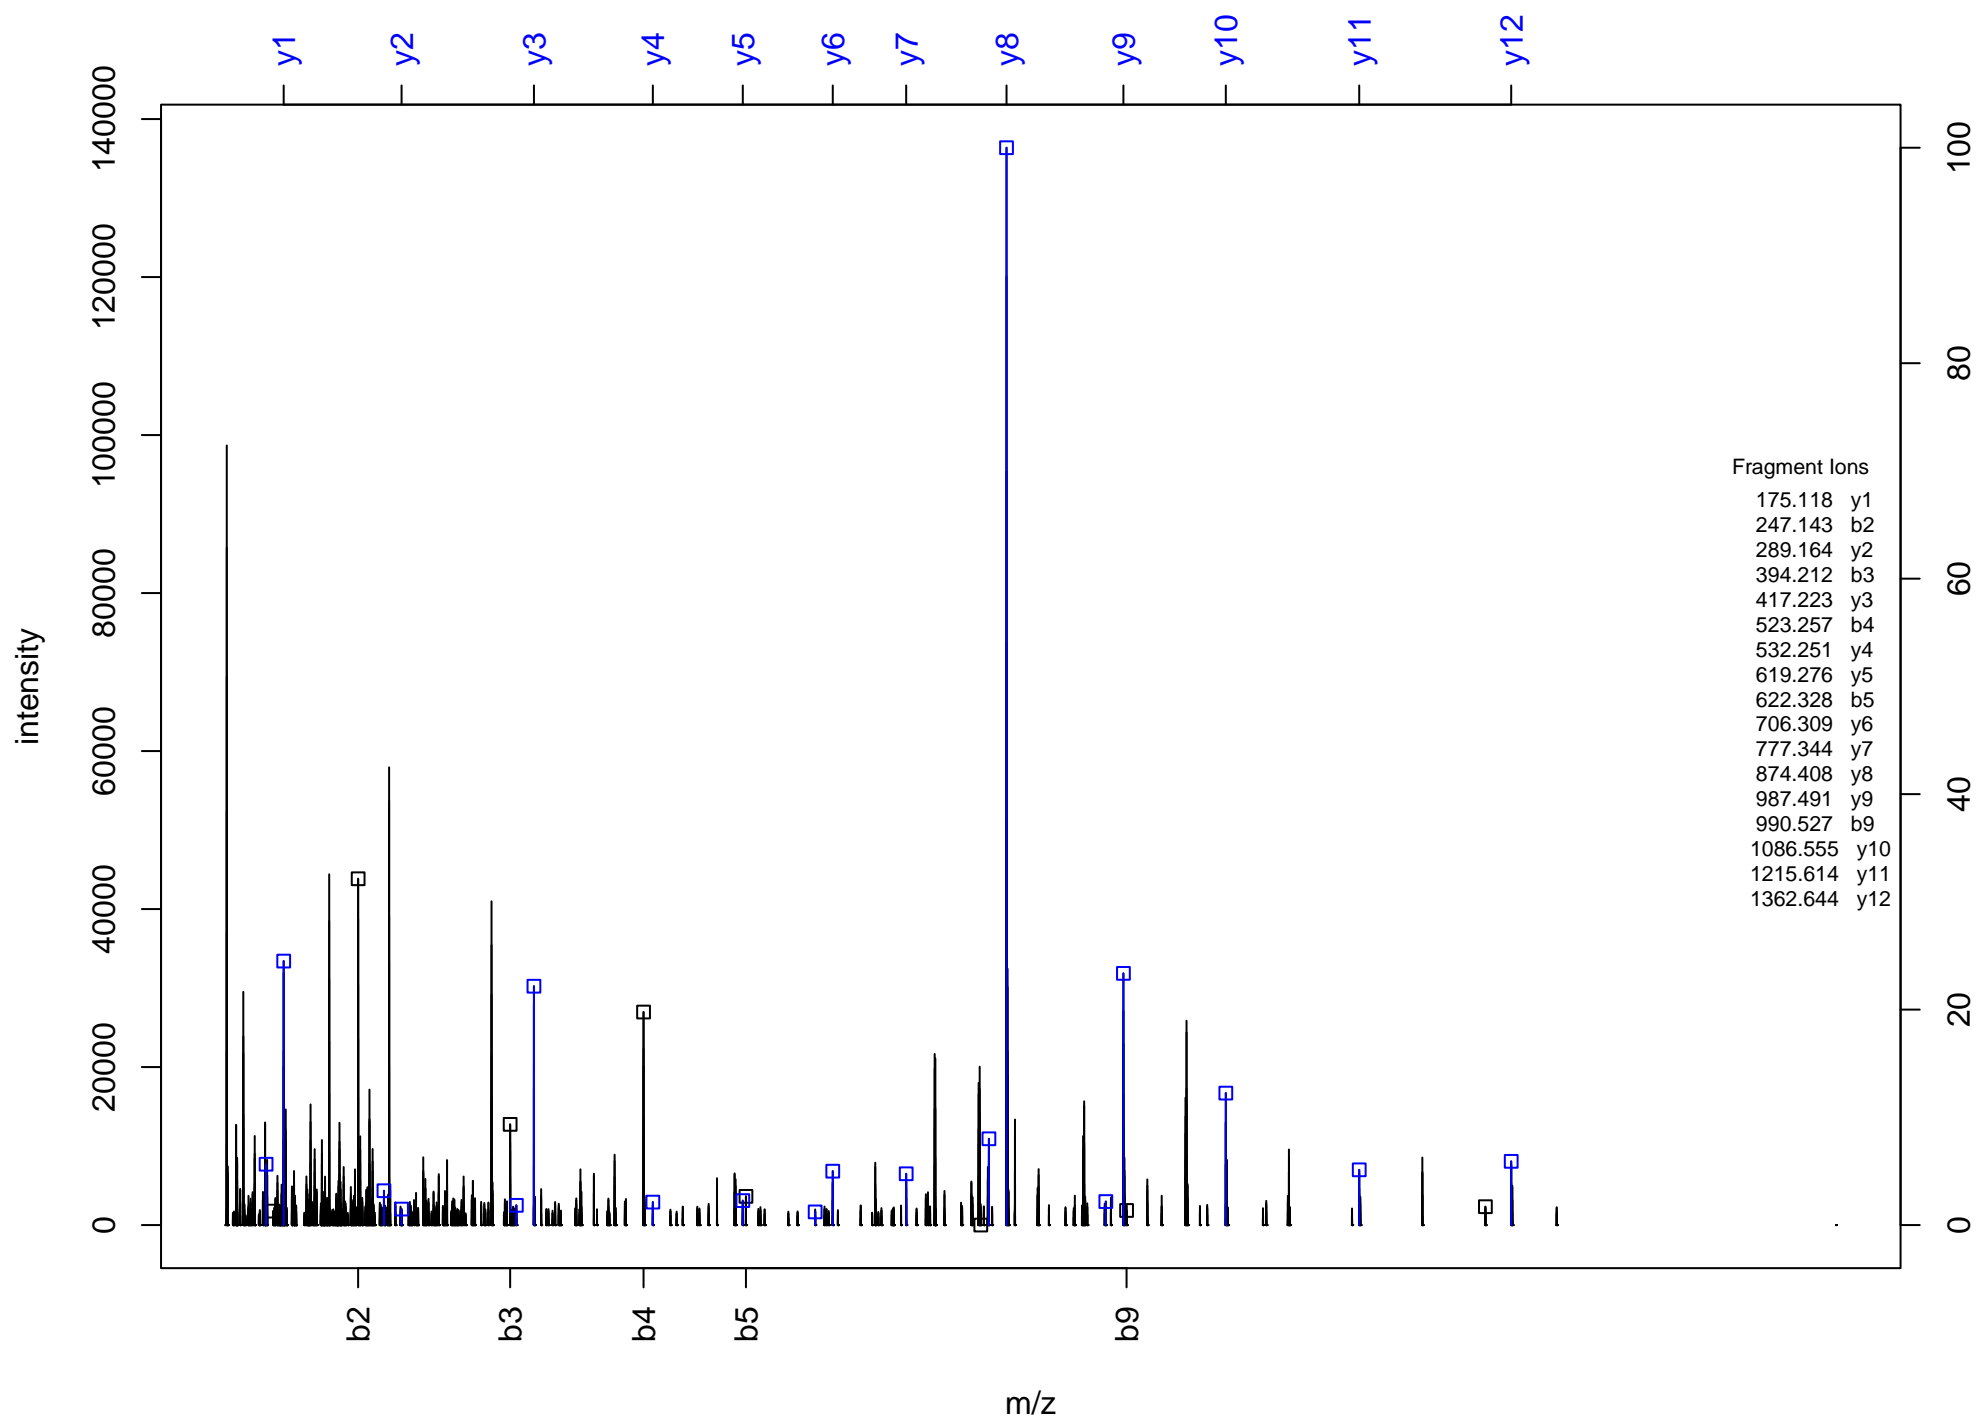

# (Ac)MMDQ^ARSAFSN^L

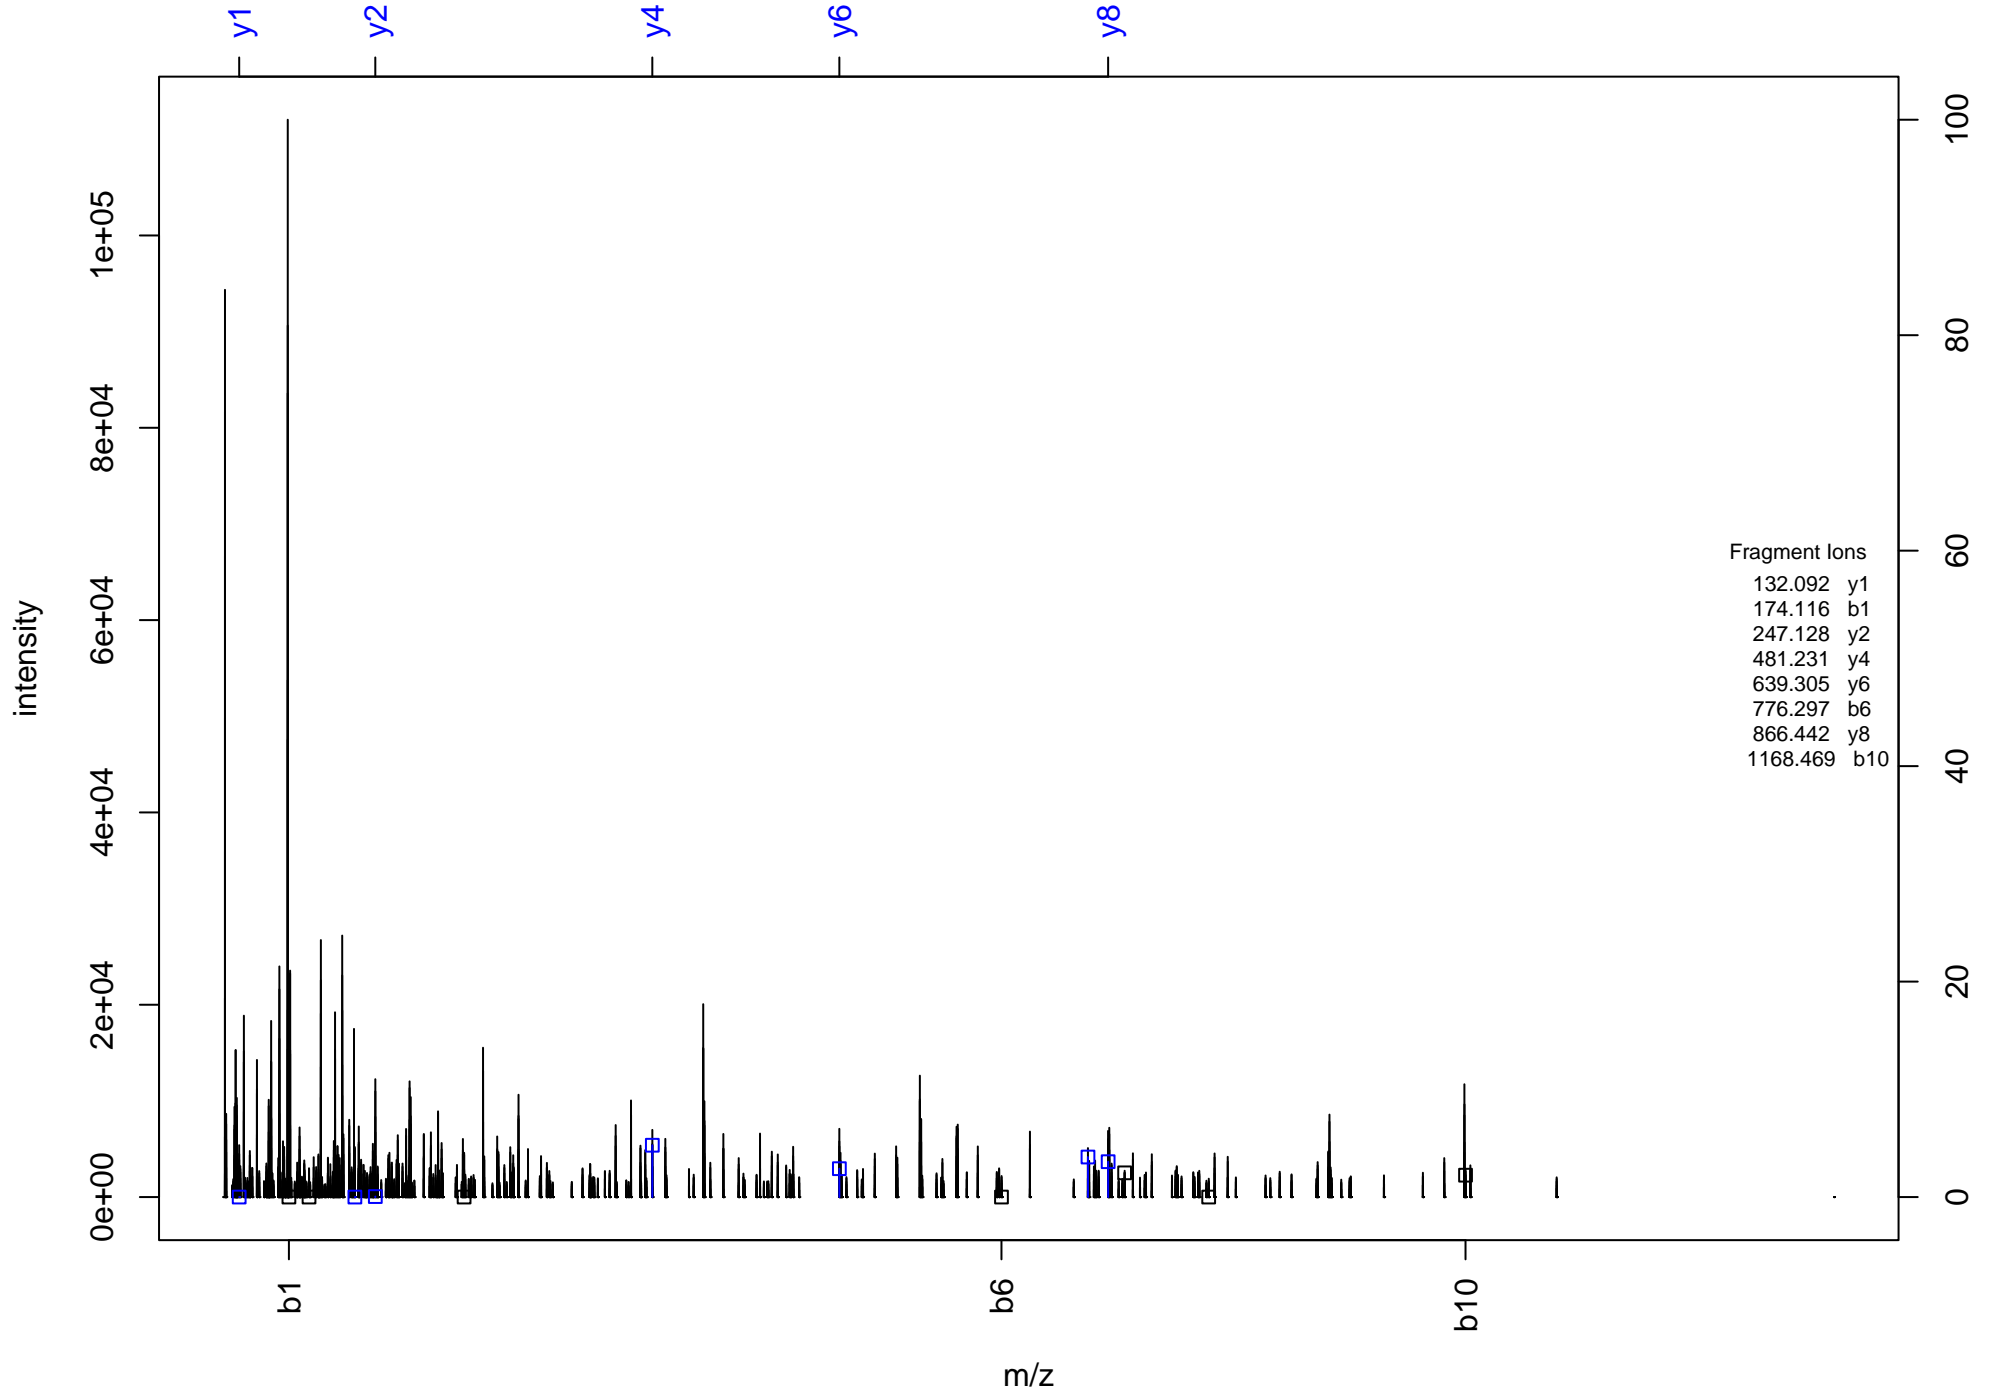

# IECESAETTEDCIEK

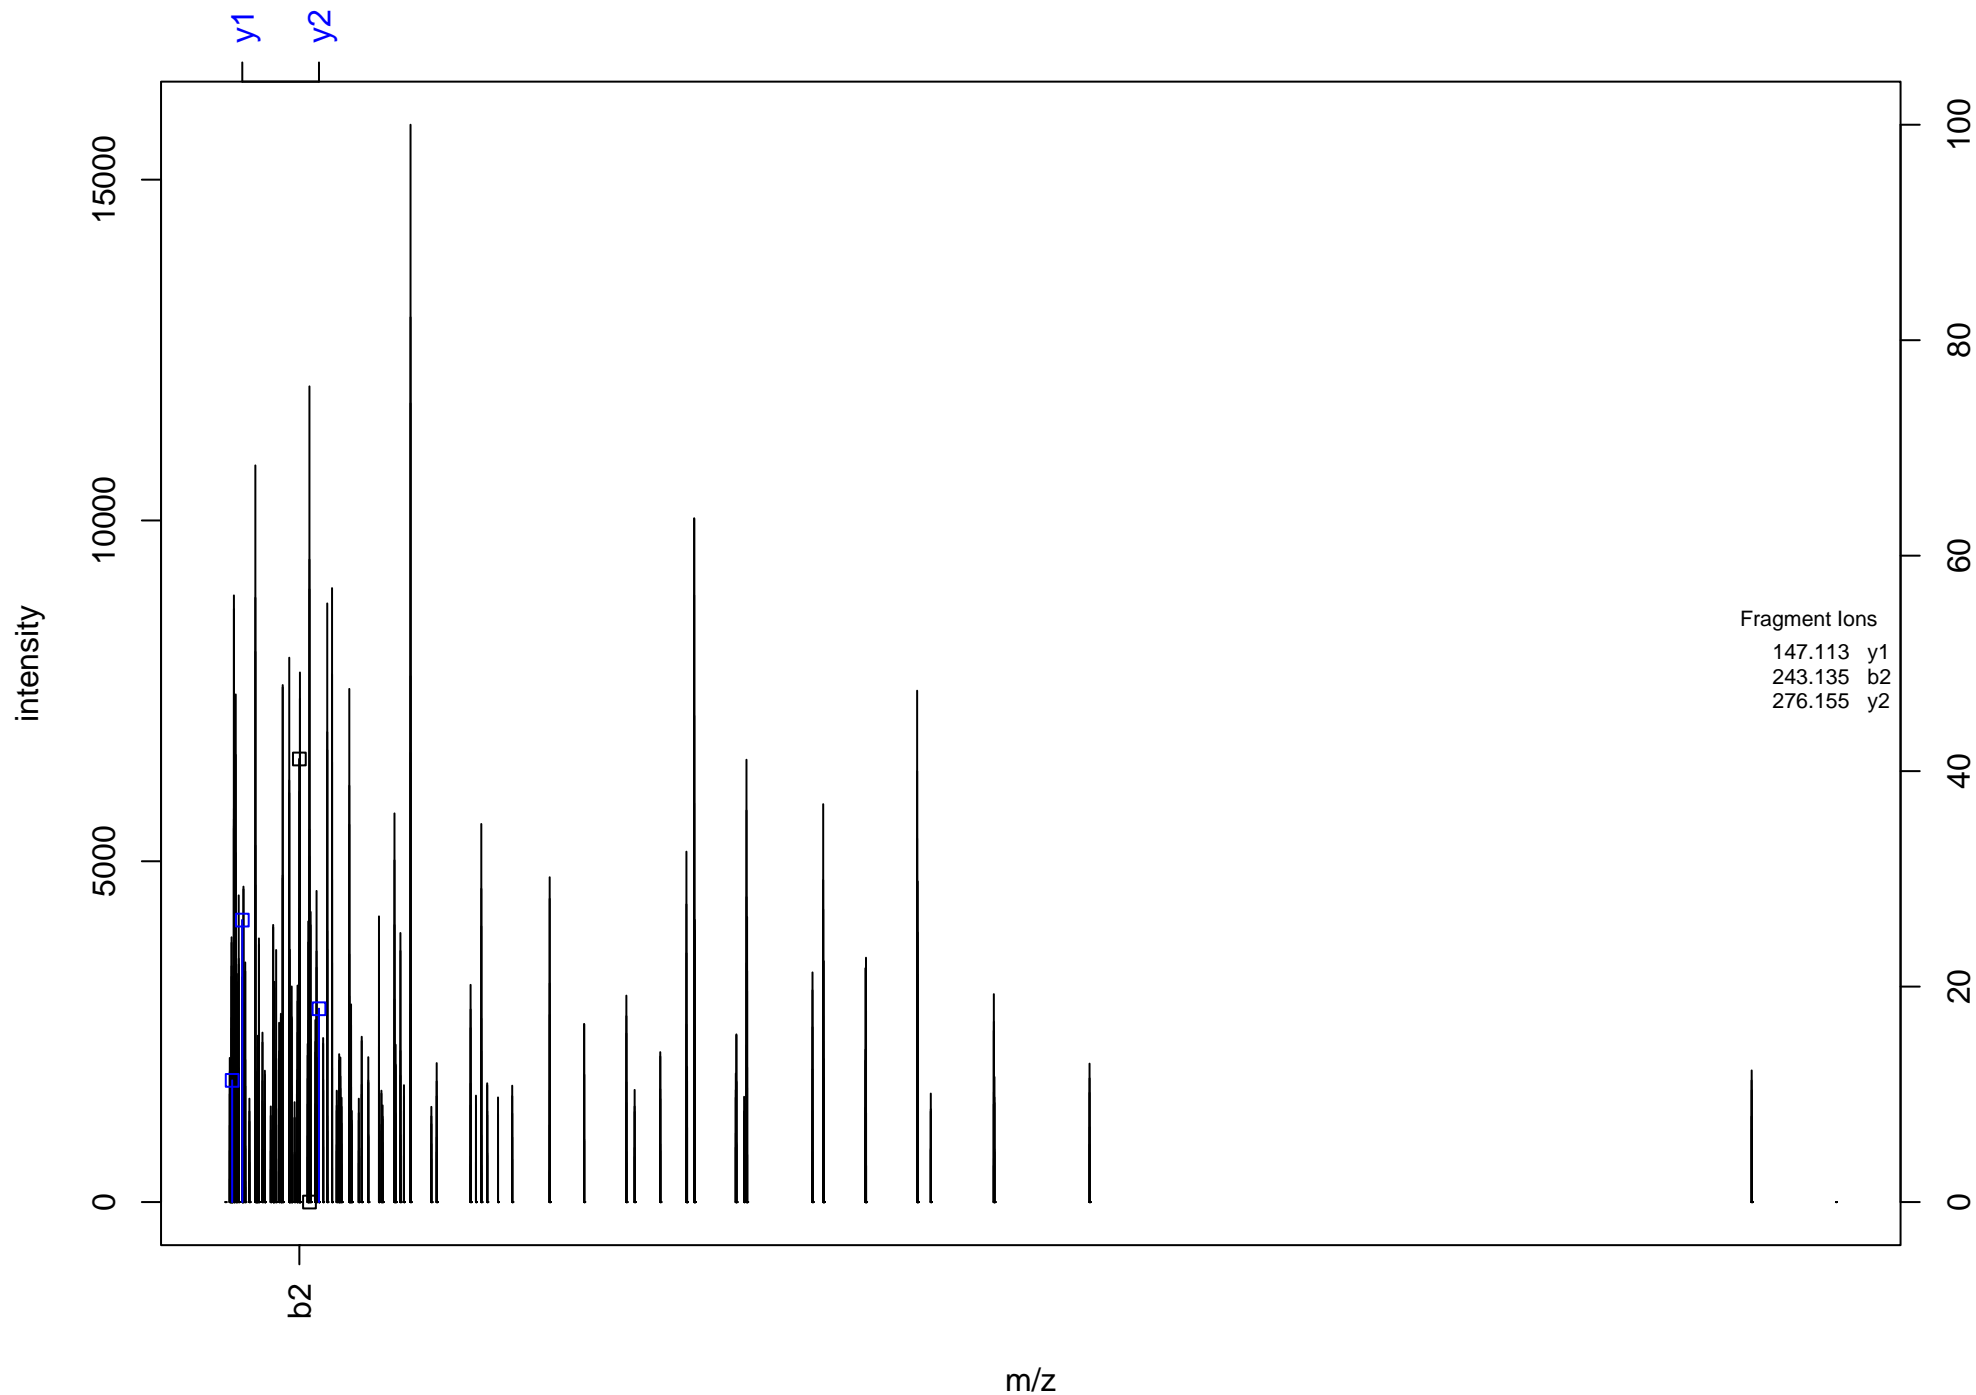

# LEGWELFPTPK

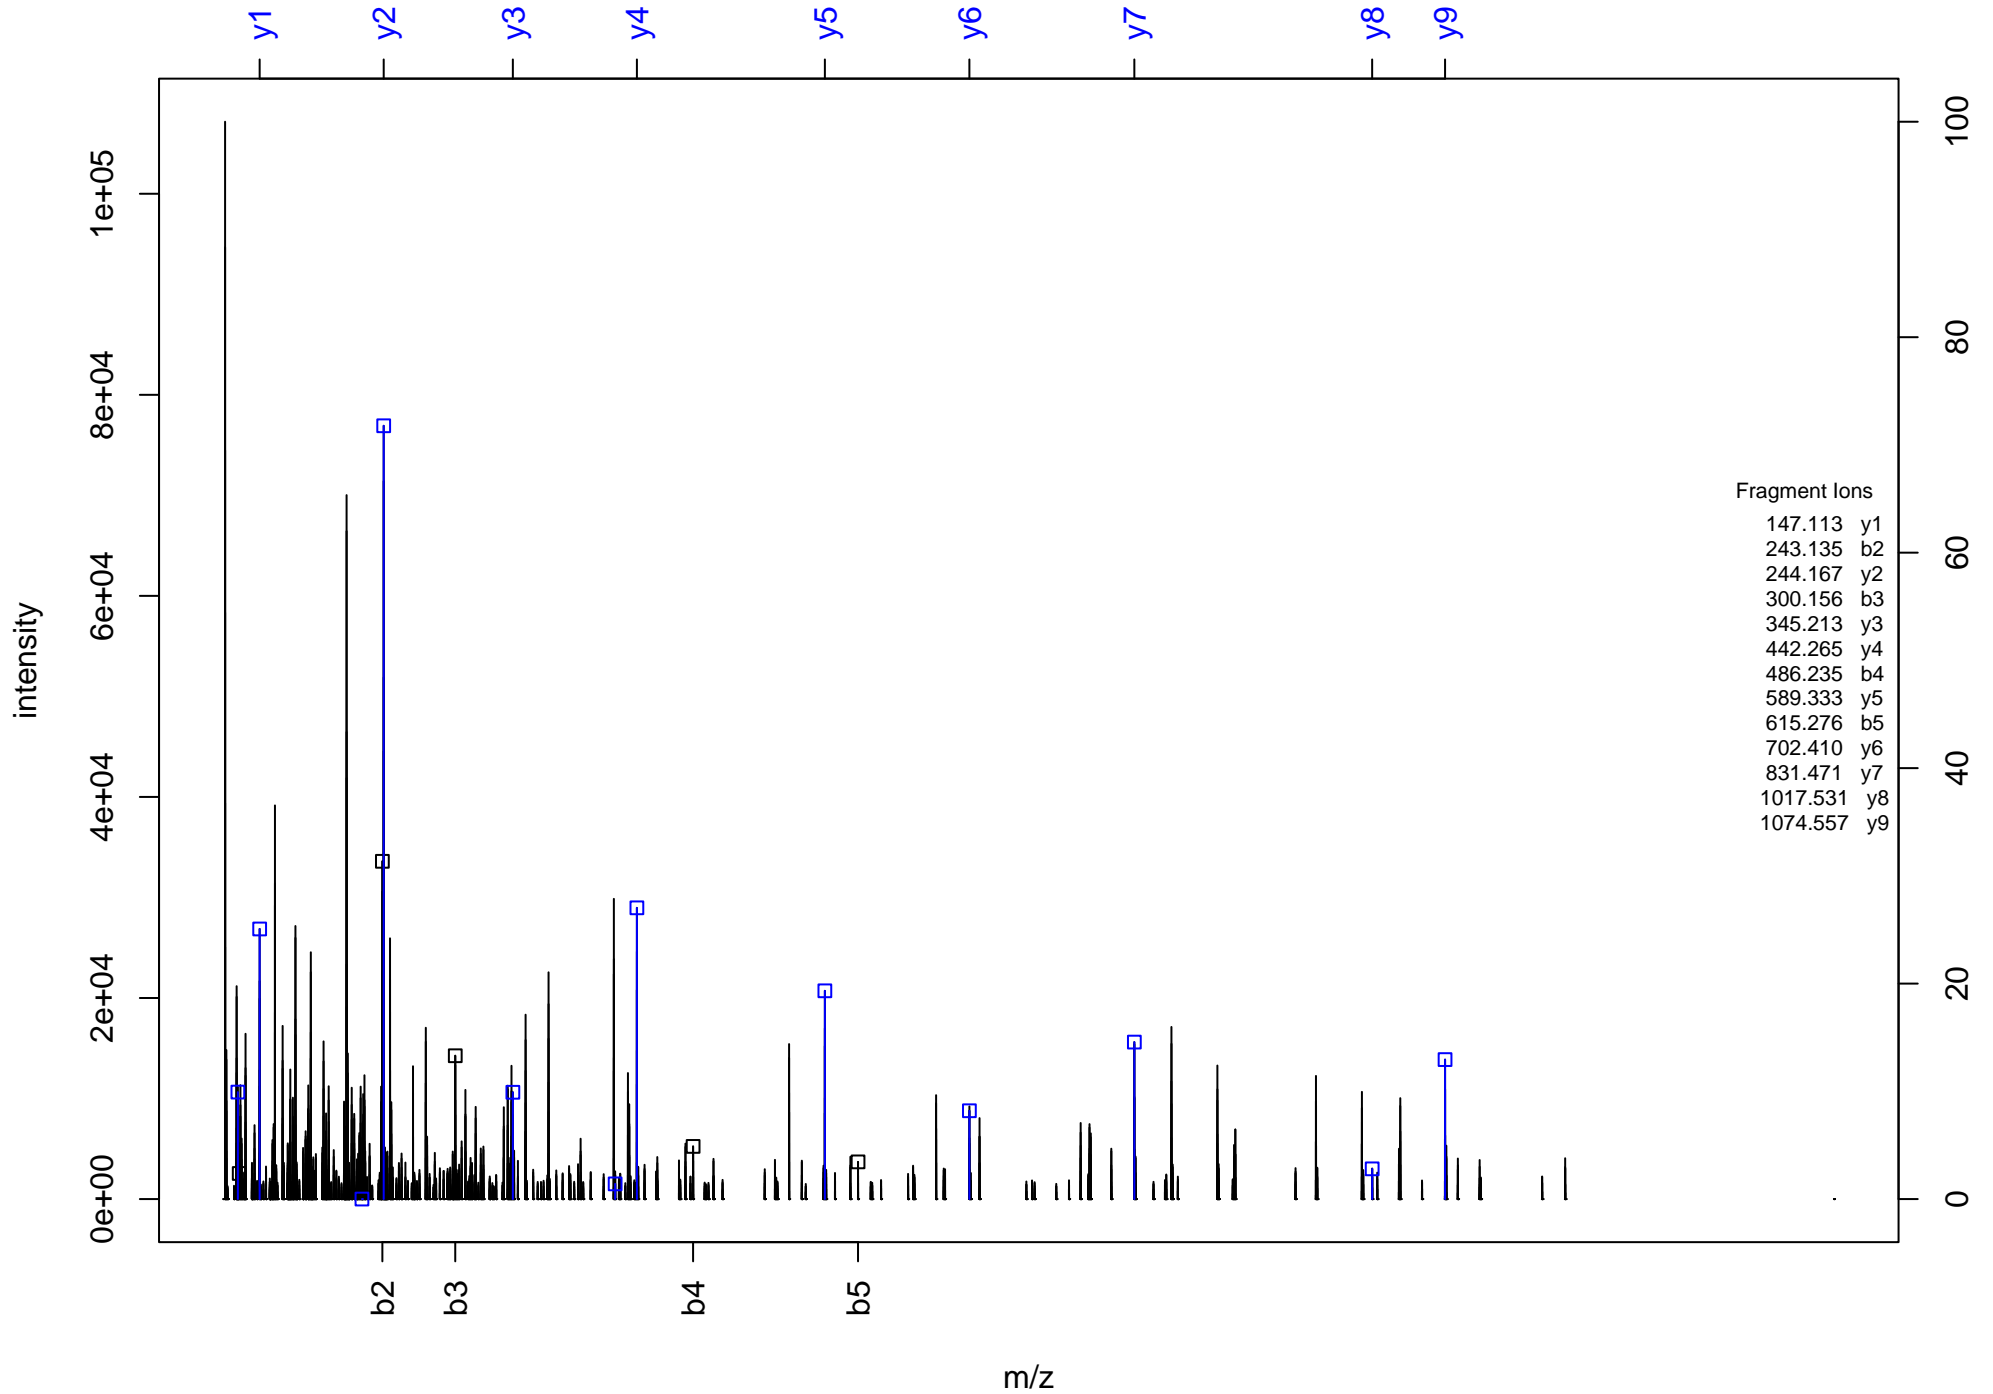

# APVLLAGTADGNTWMWK

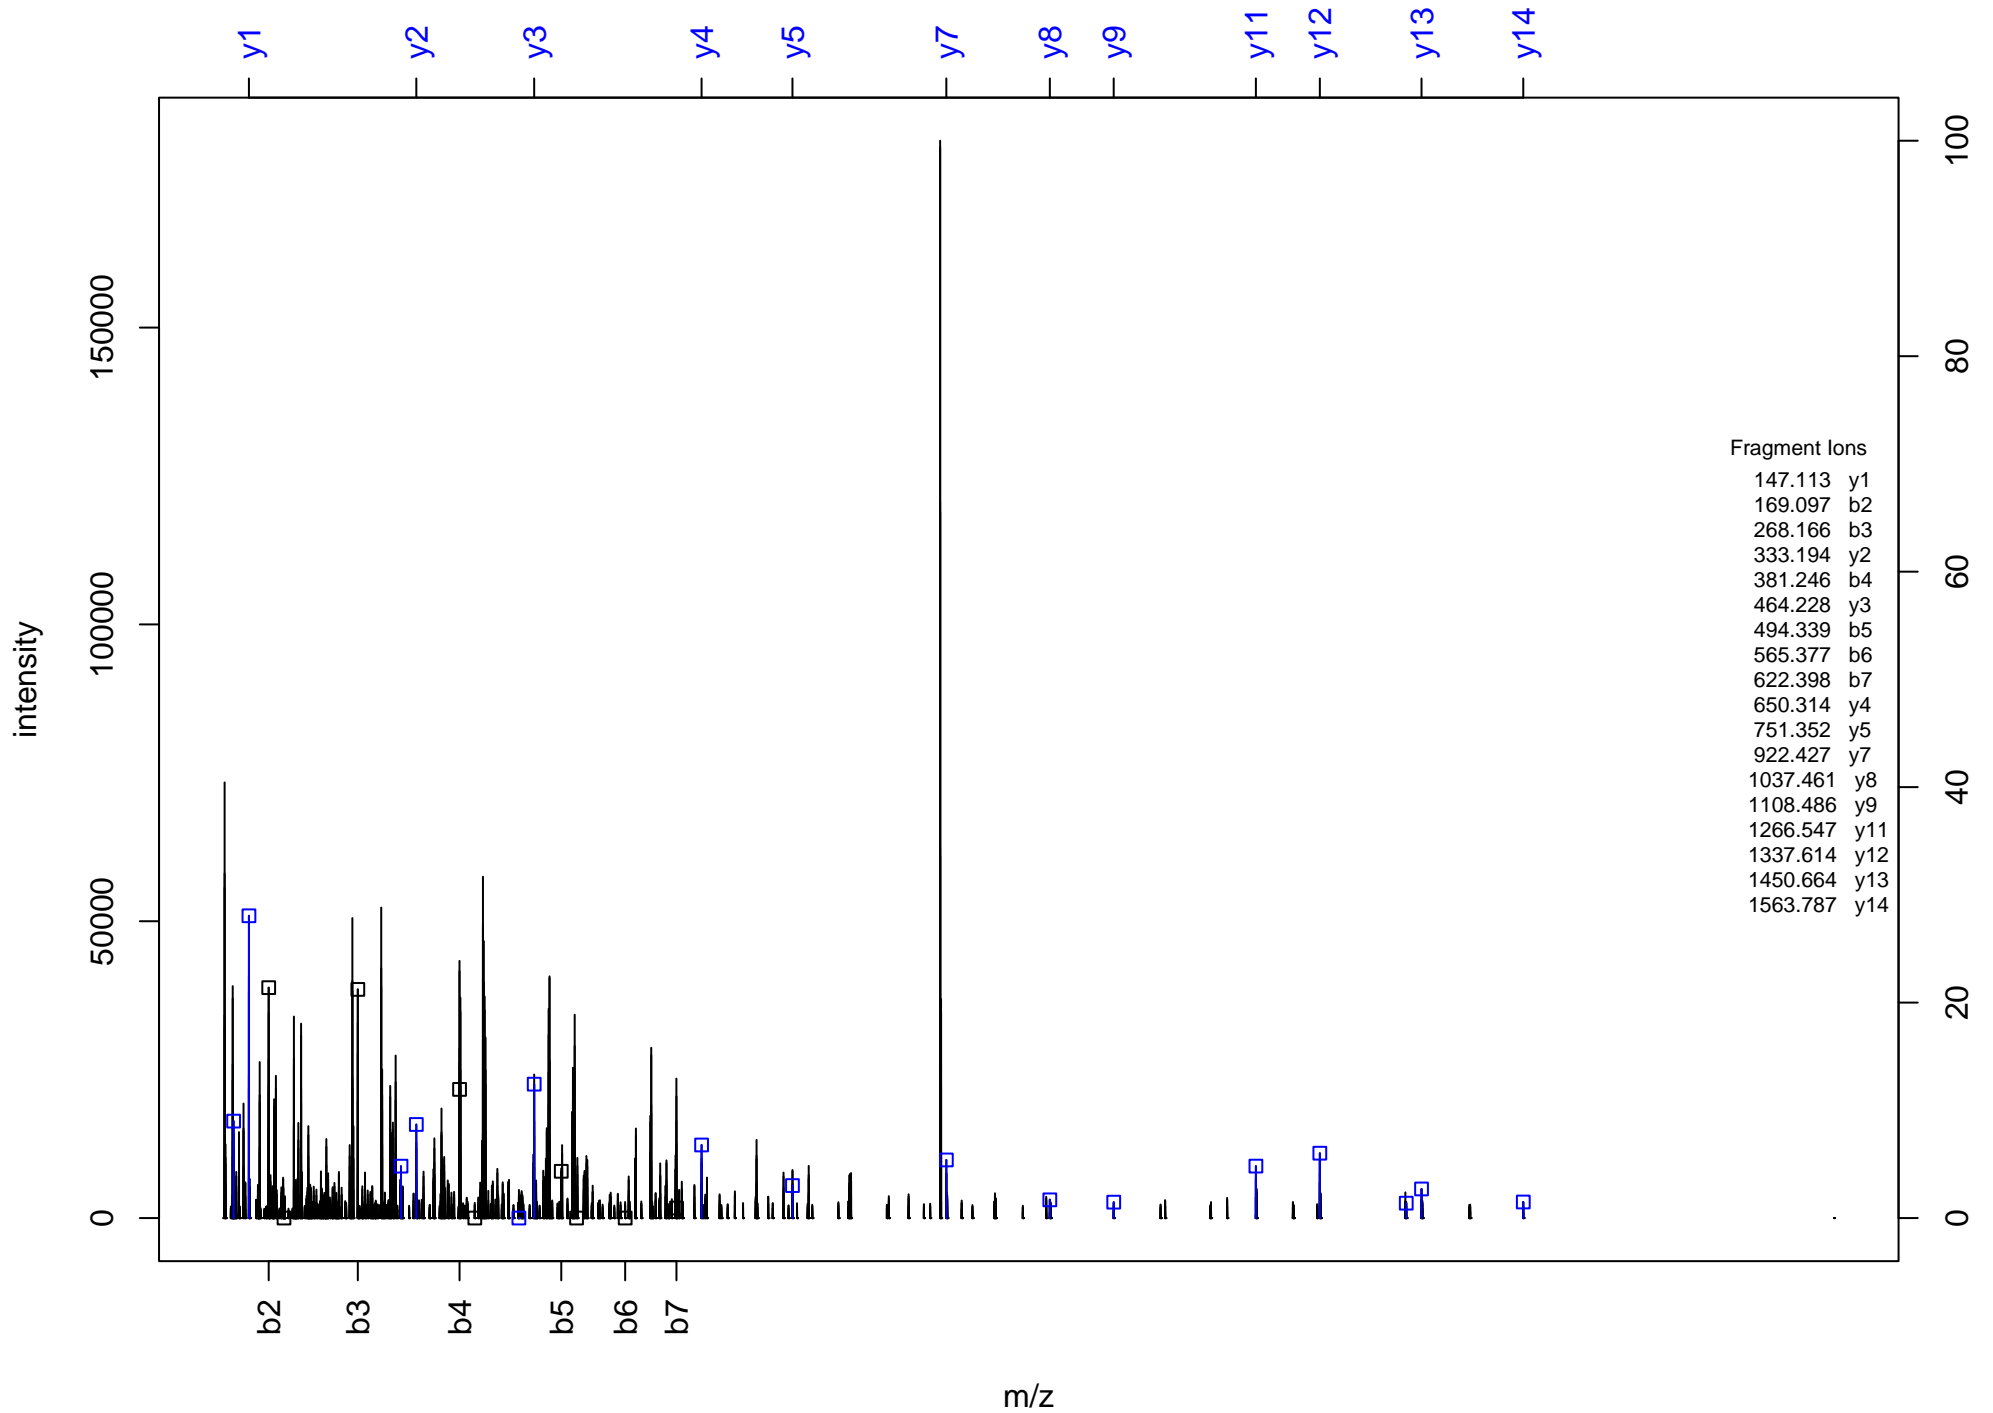

# YDPIPVCTSLFGDTSDDTTSTGLAQR

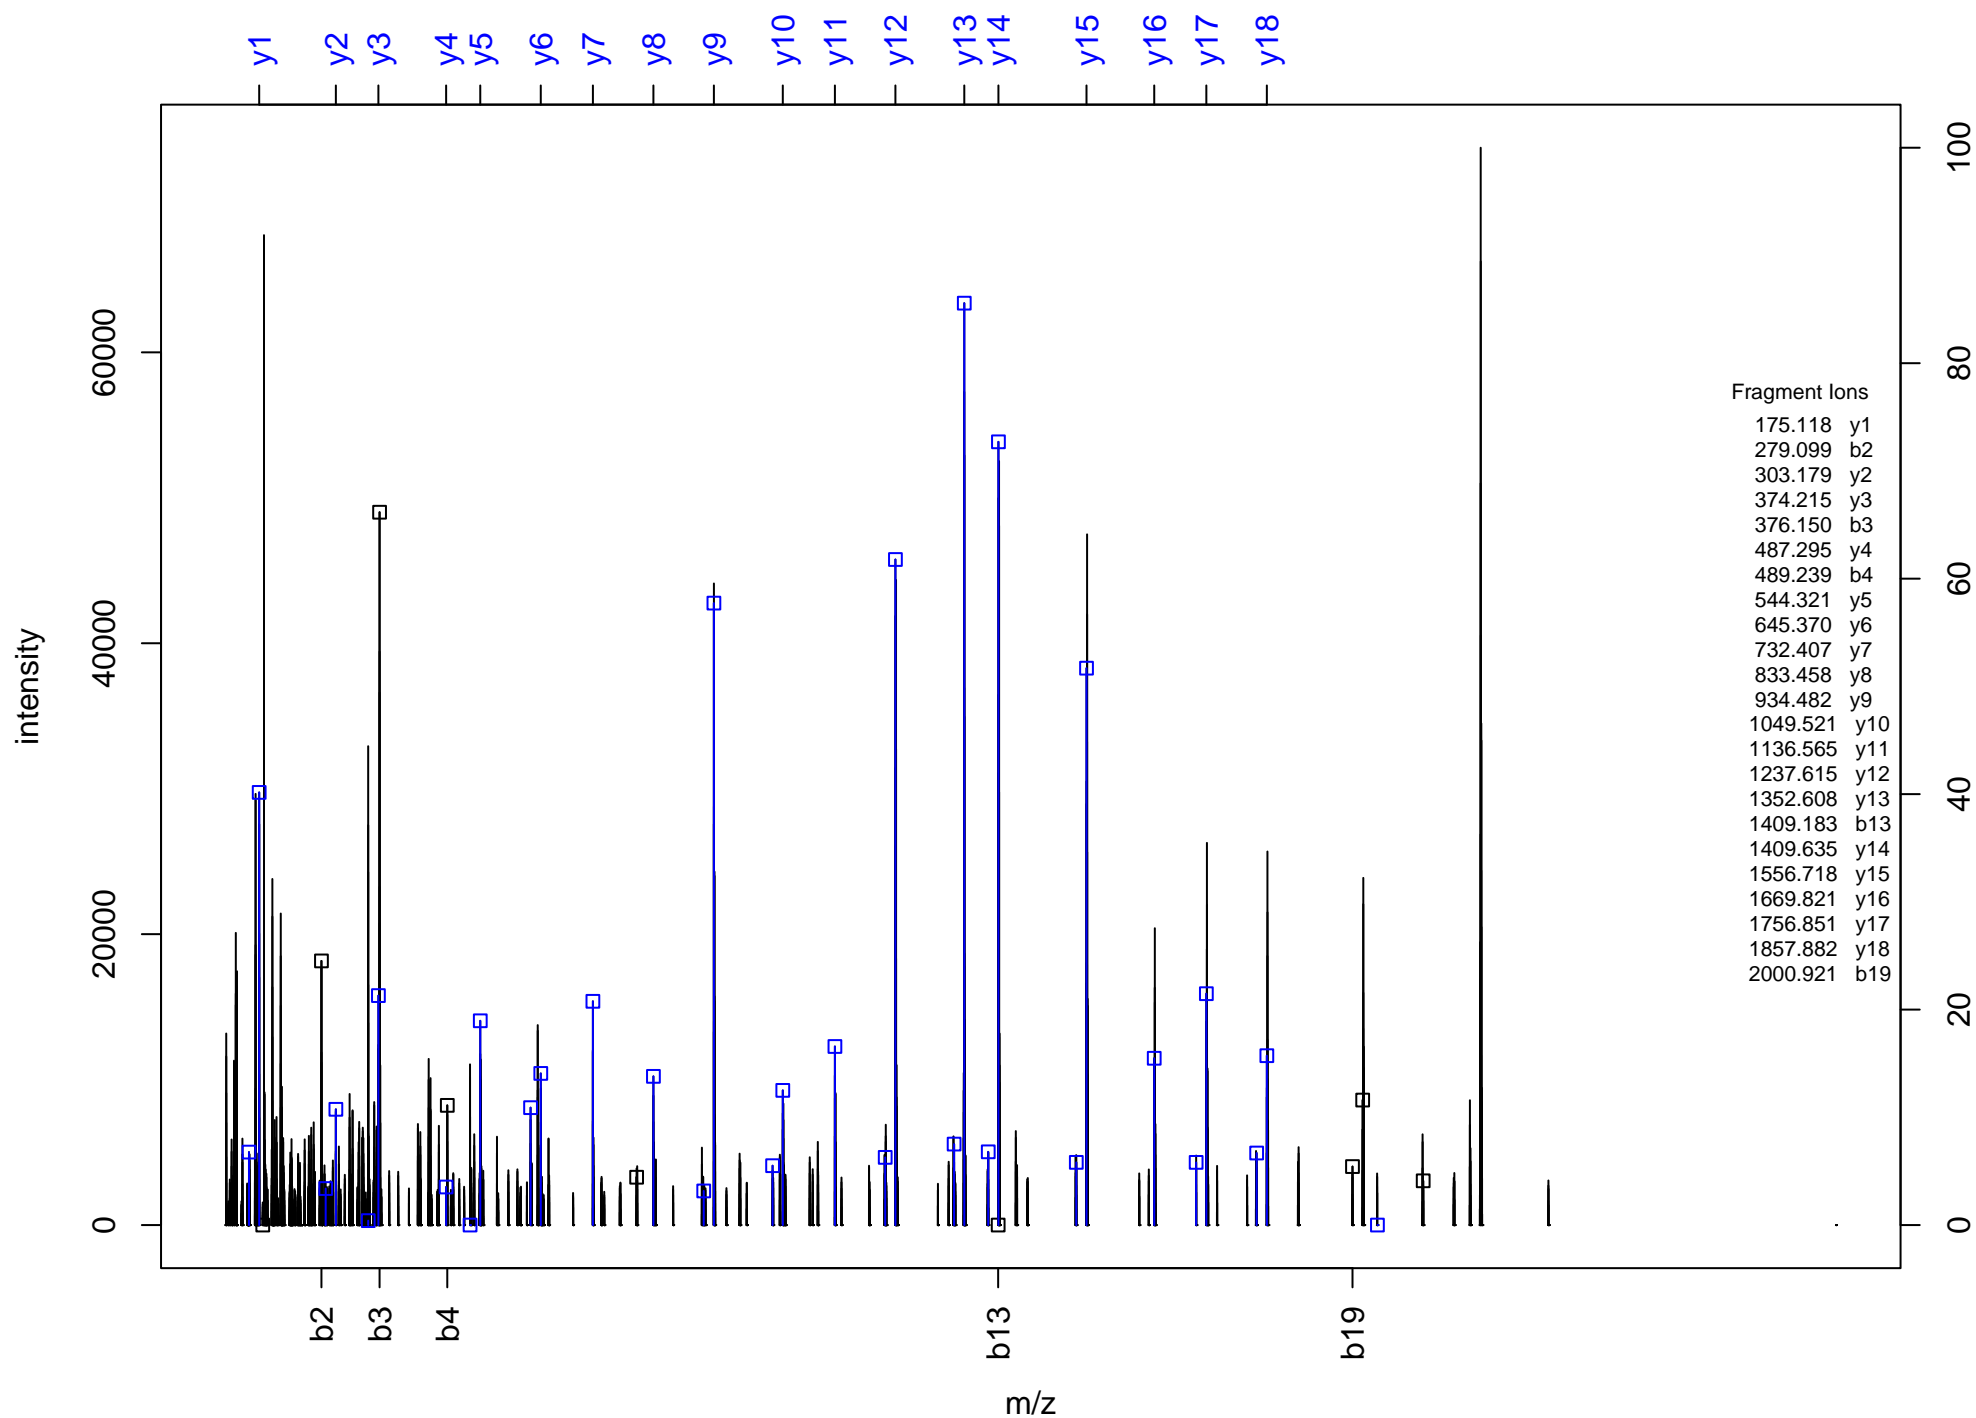



# TQQQVEAEVSNIK

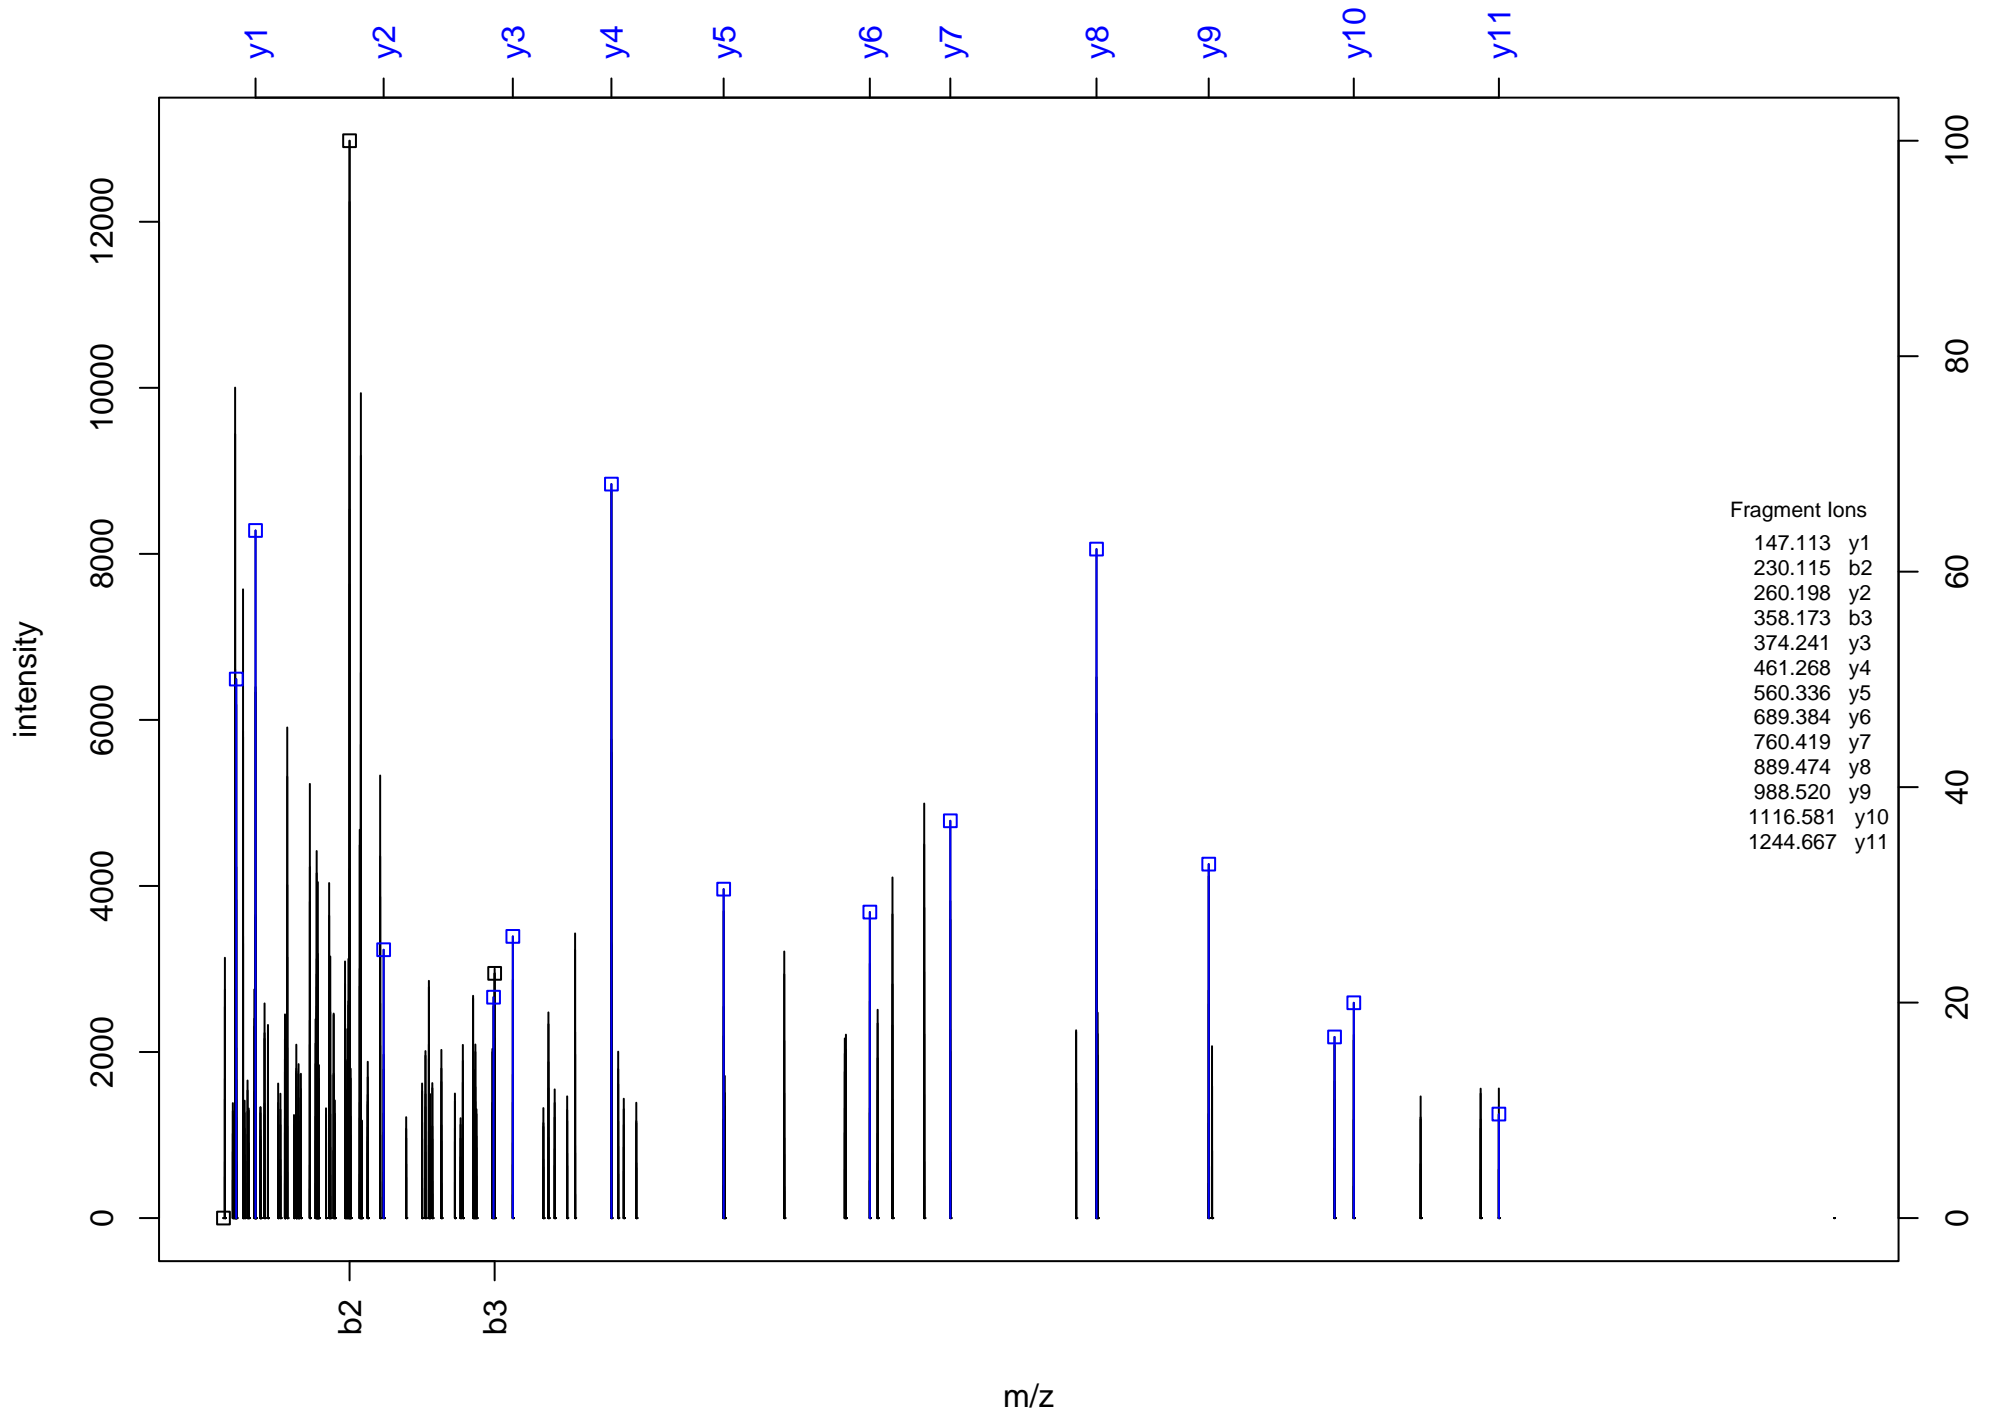

# ENTLLWFTGDNGPWAQK

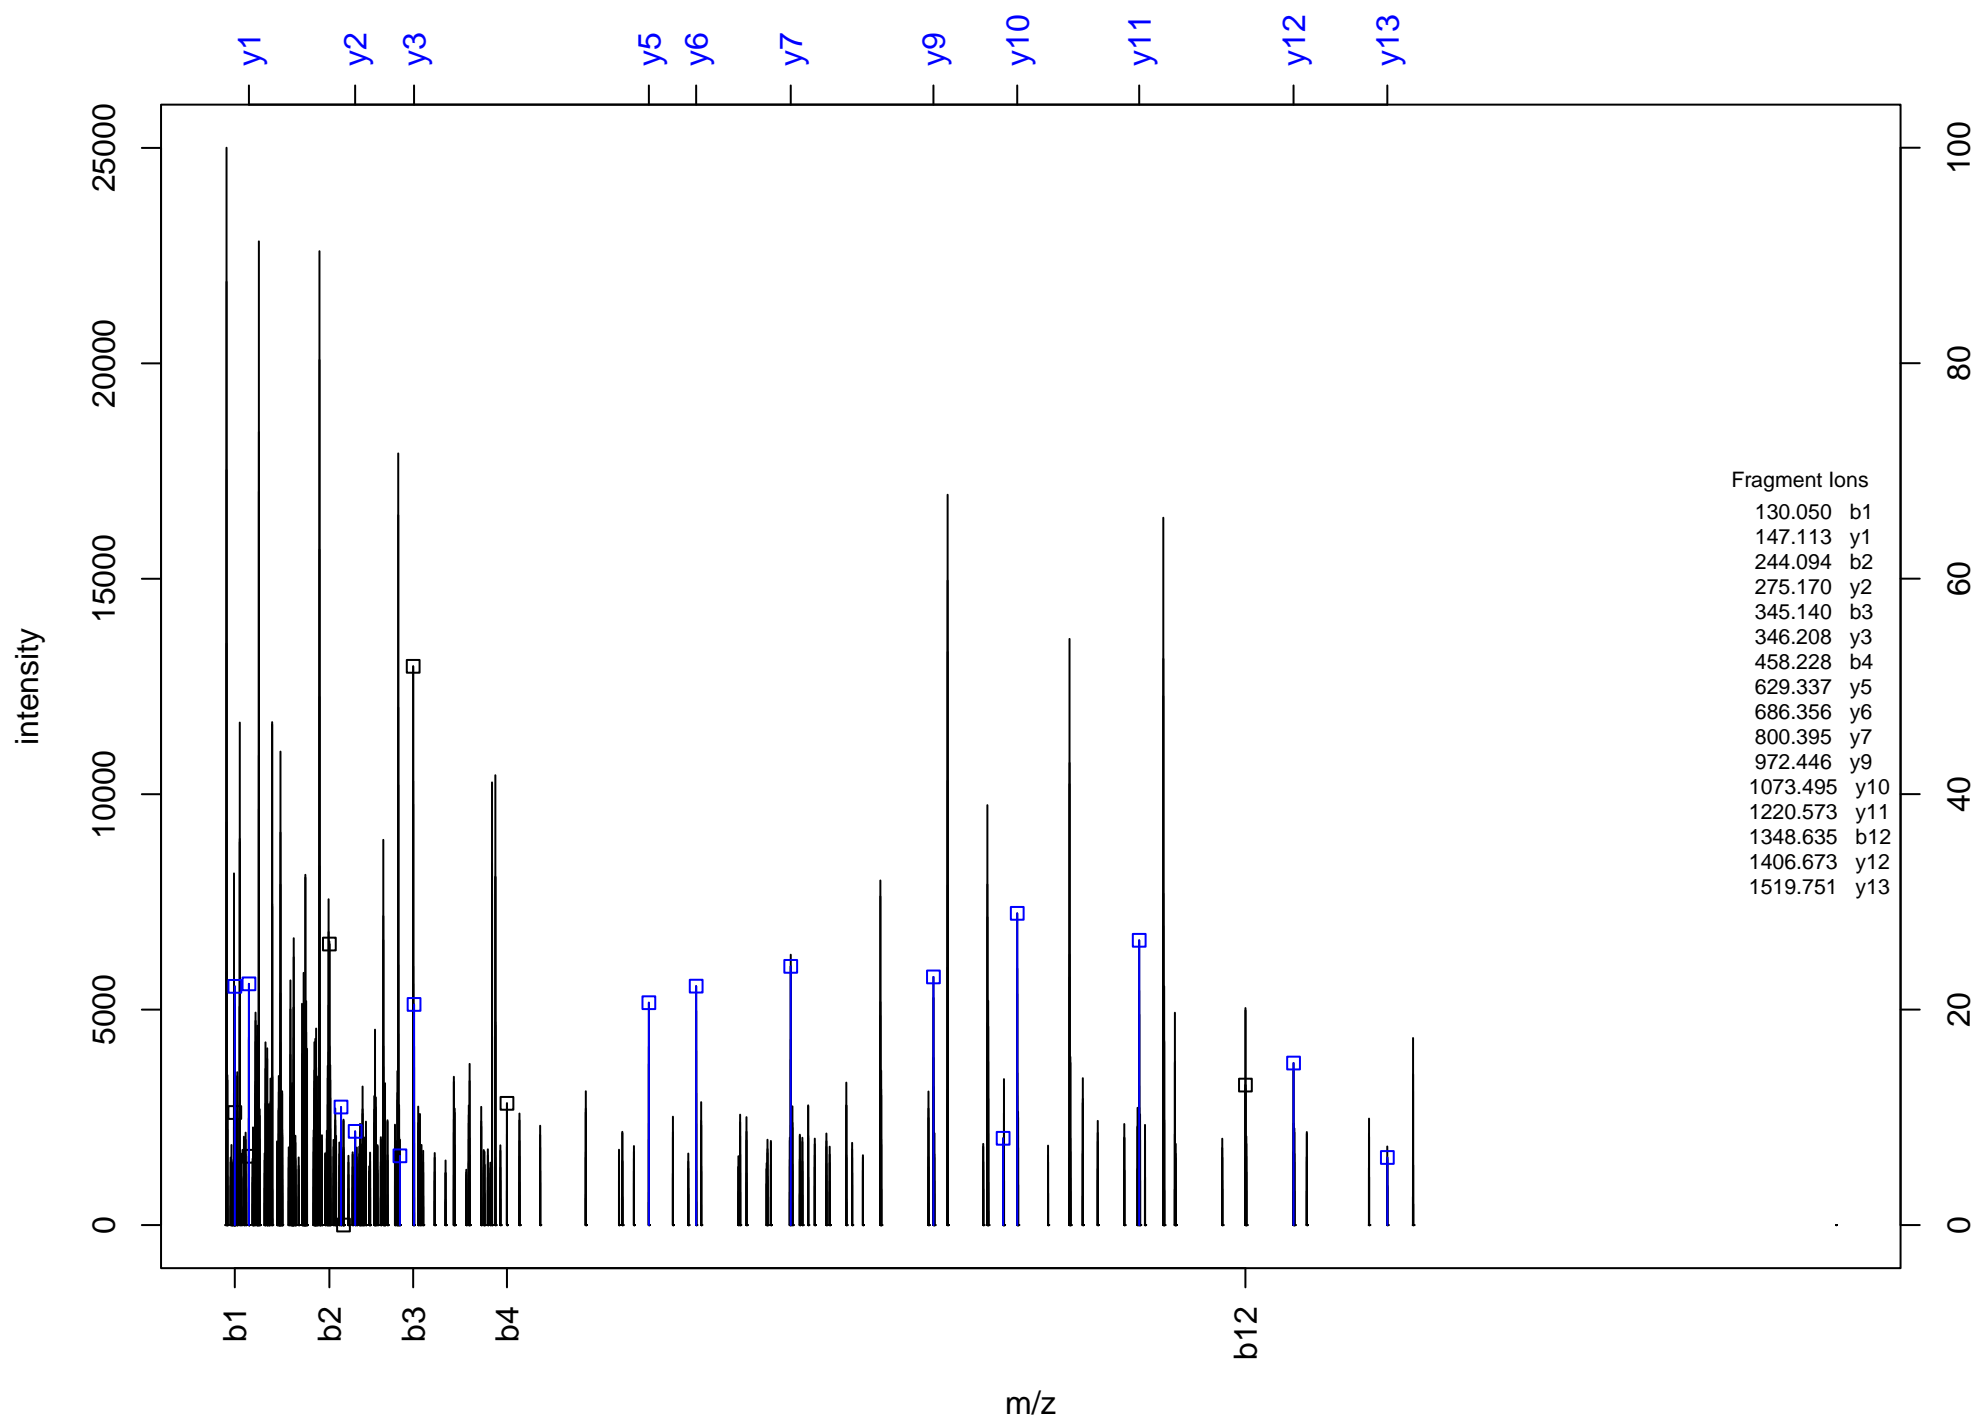

# TELPVTENVQTIPPPYVVR

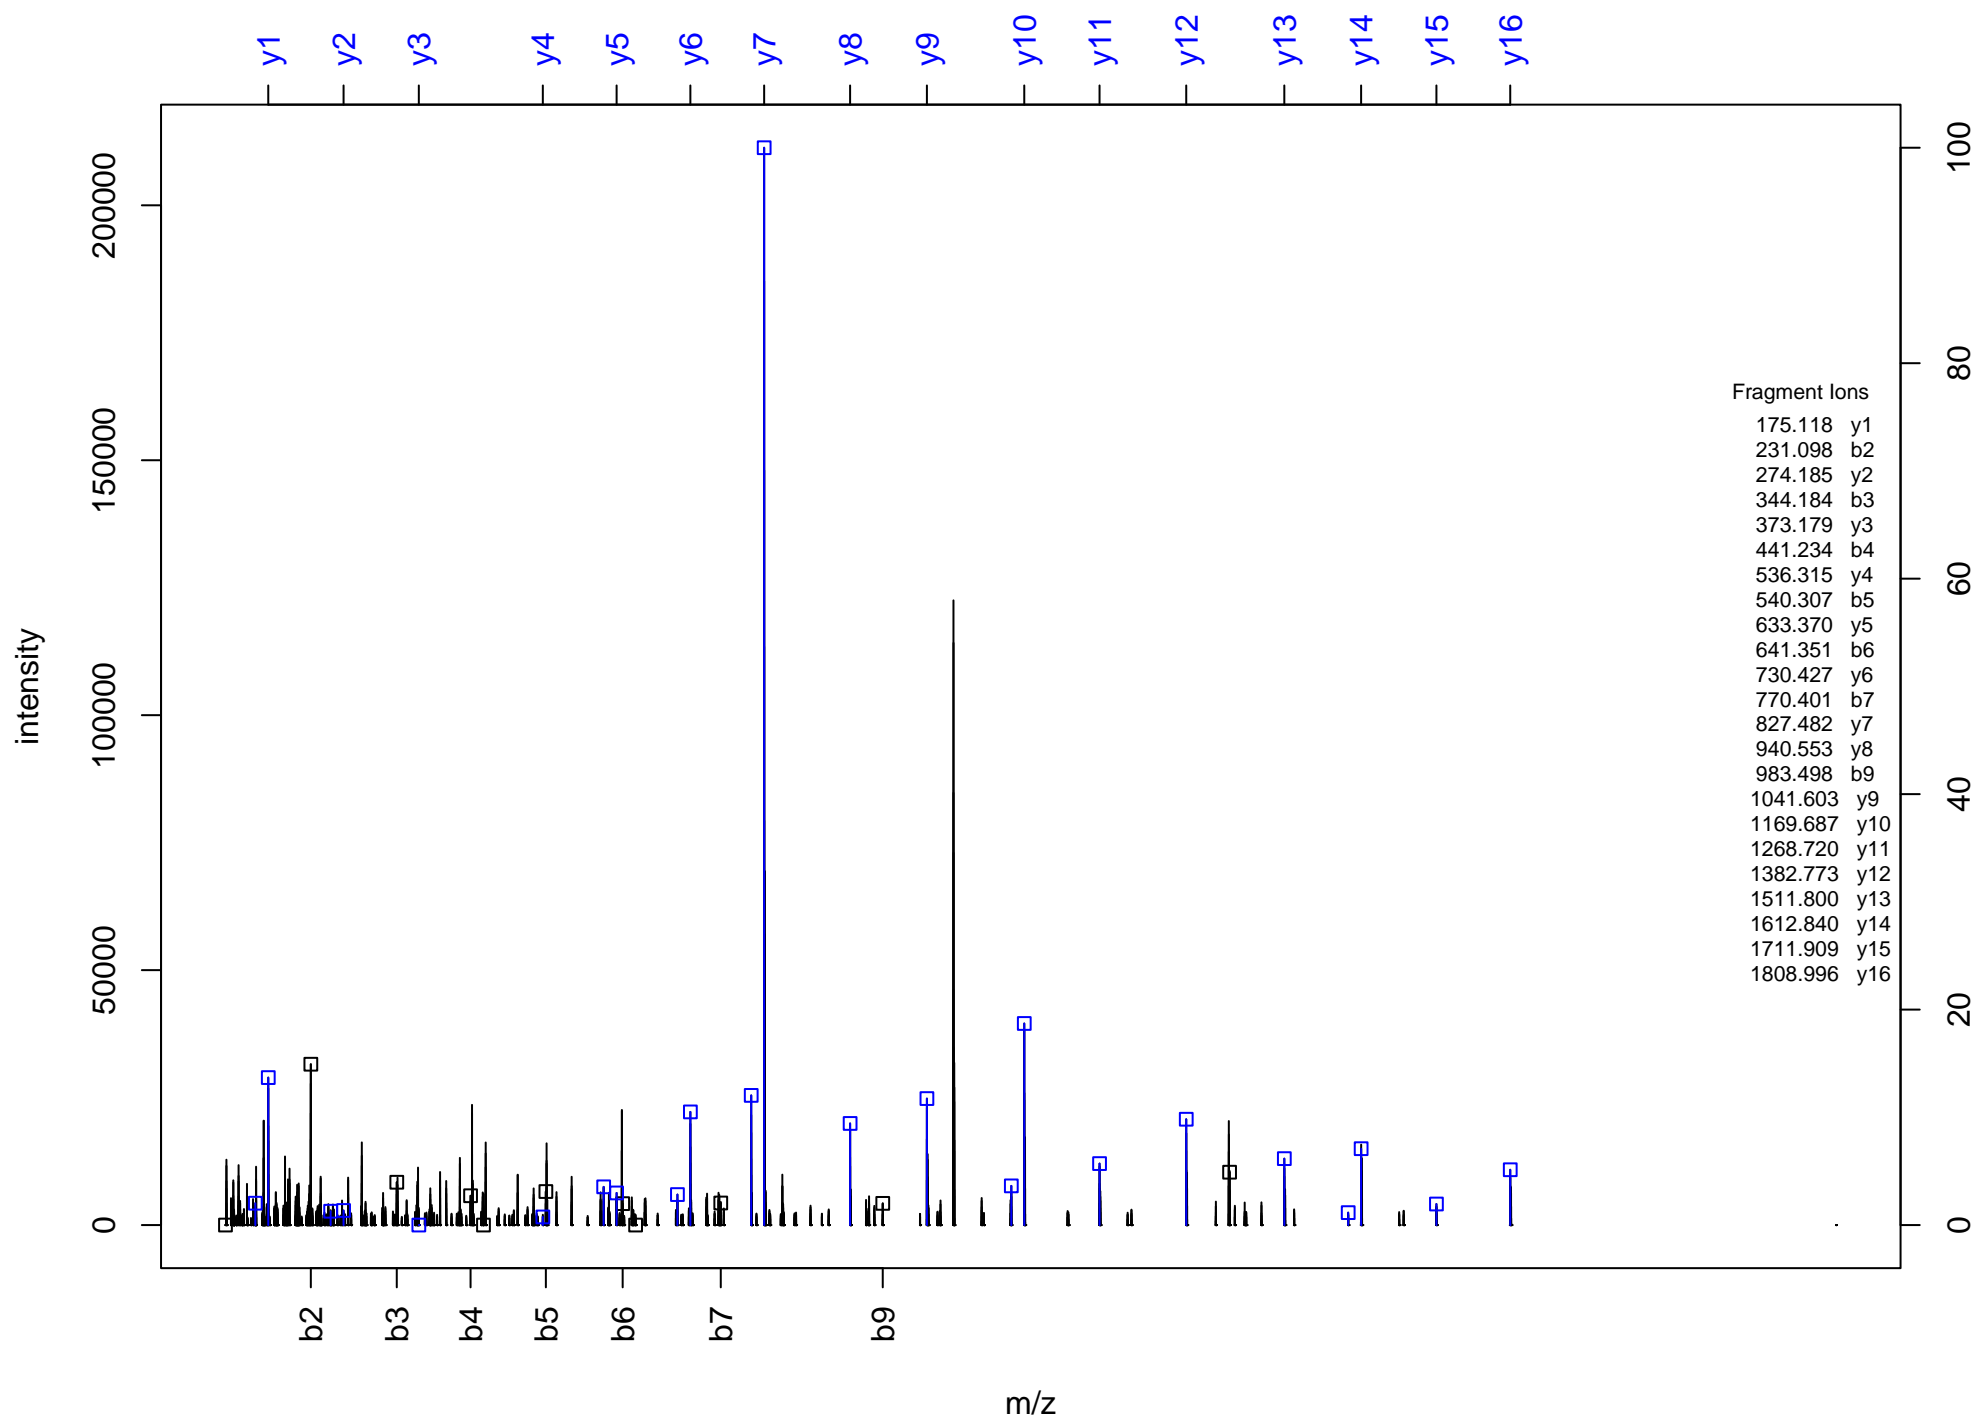

# QWLRPETHSK

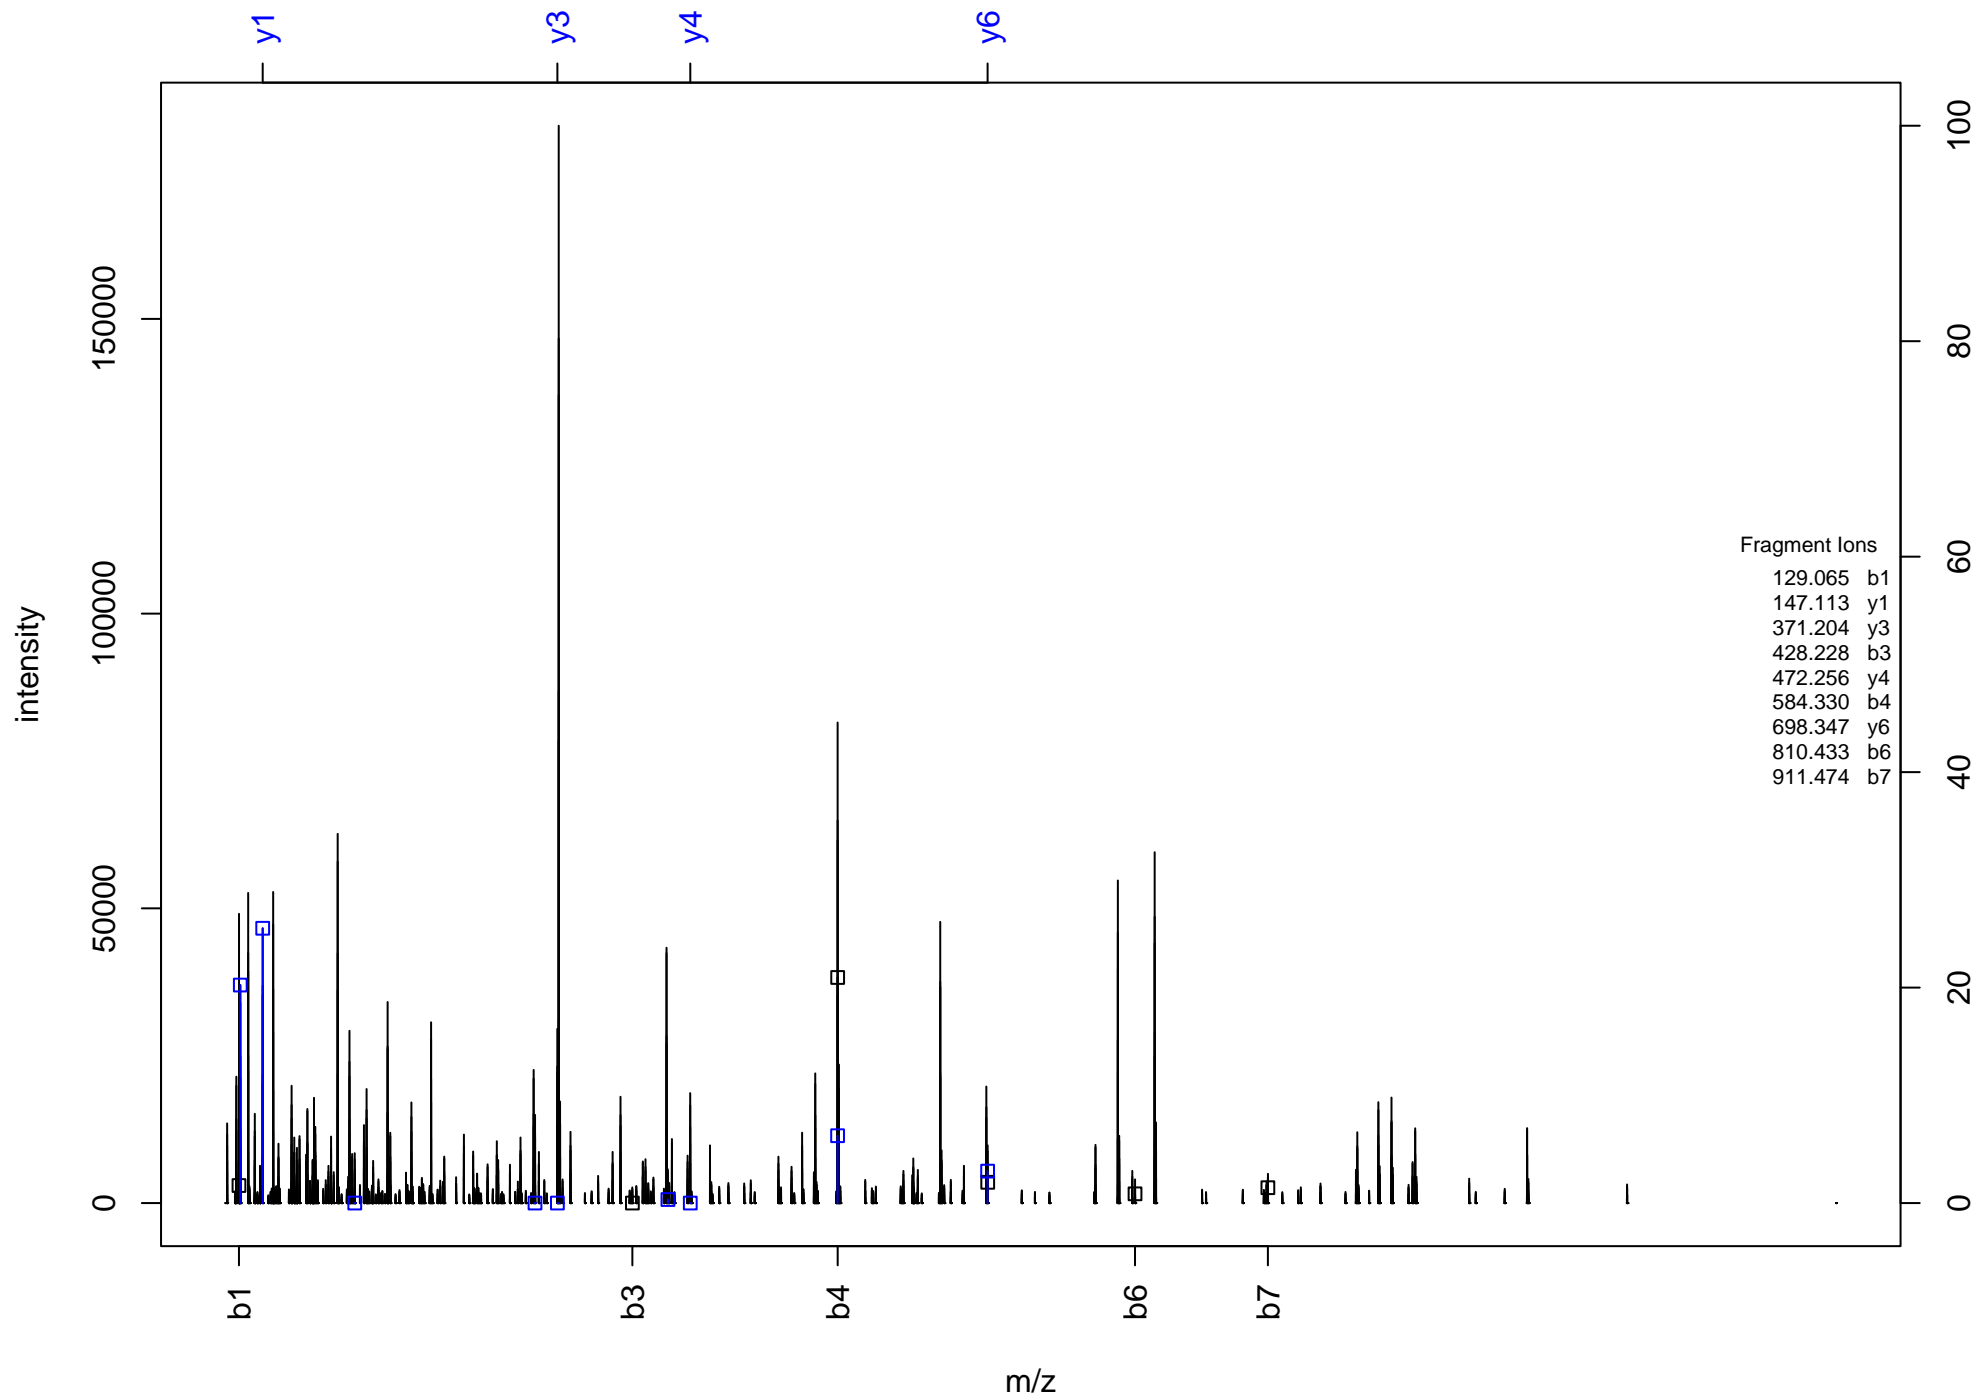

# NDNAEEHLLEAENK

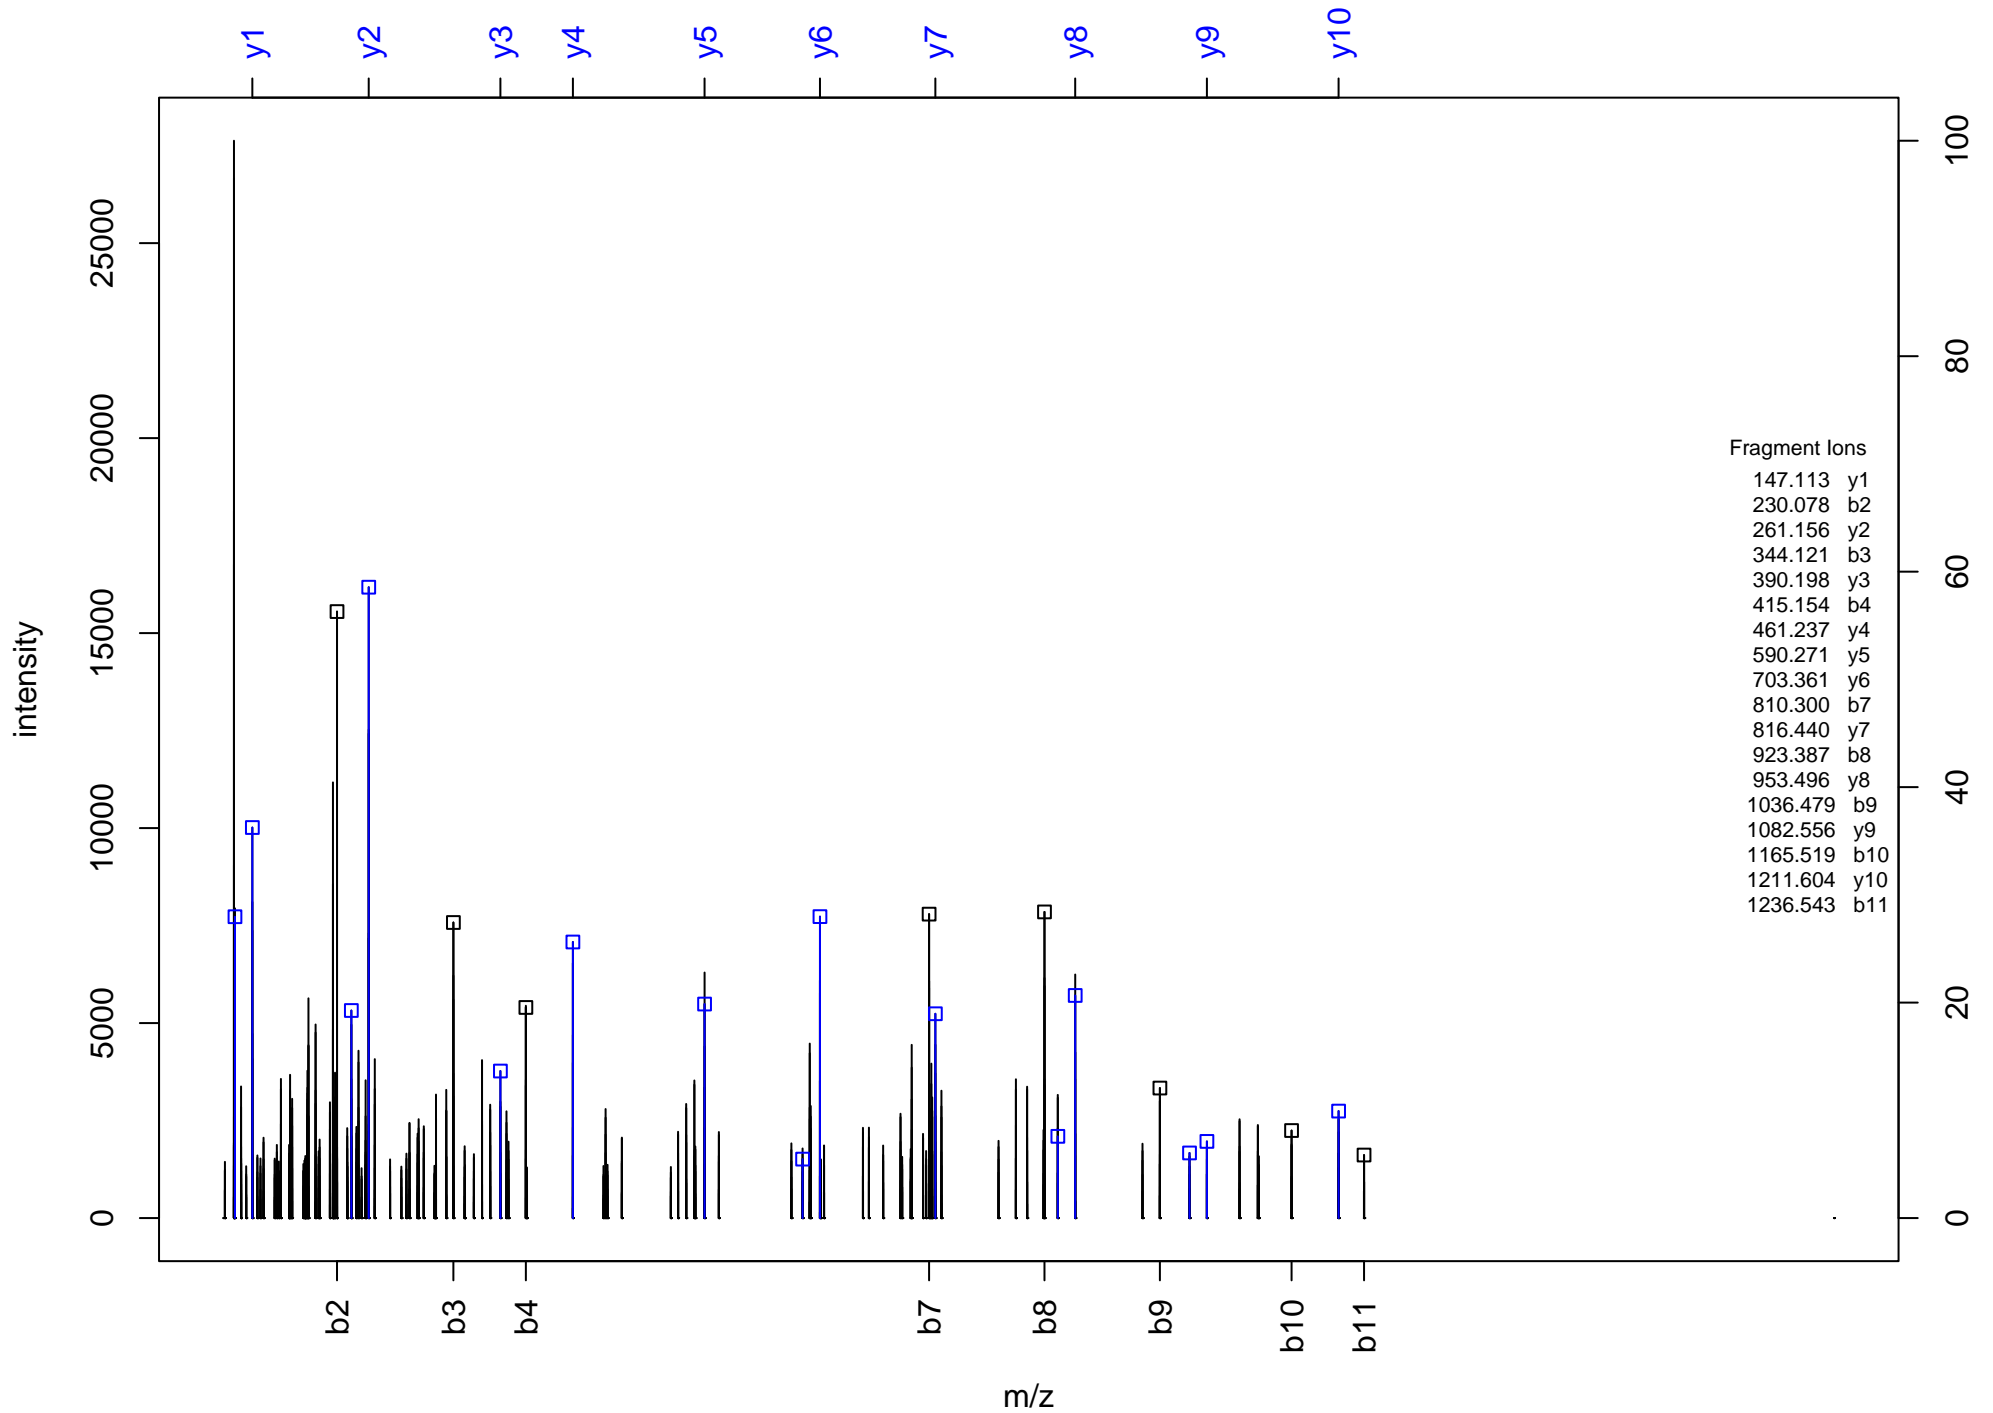

# AAPWTSFLPPPPMPGSGLGPGK

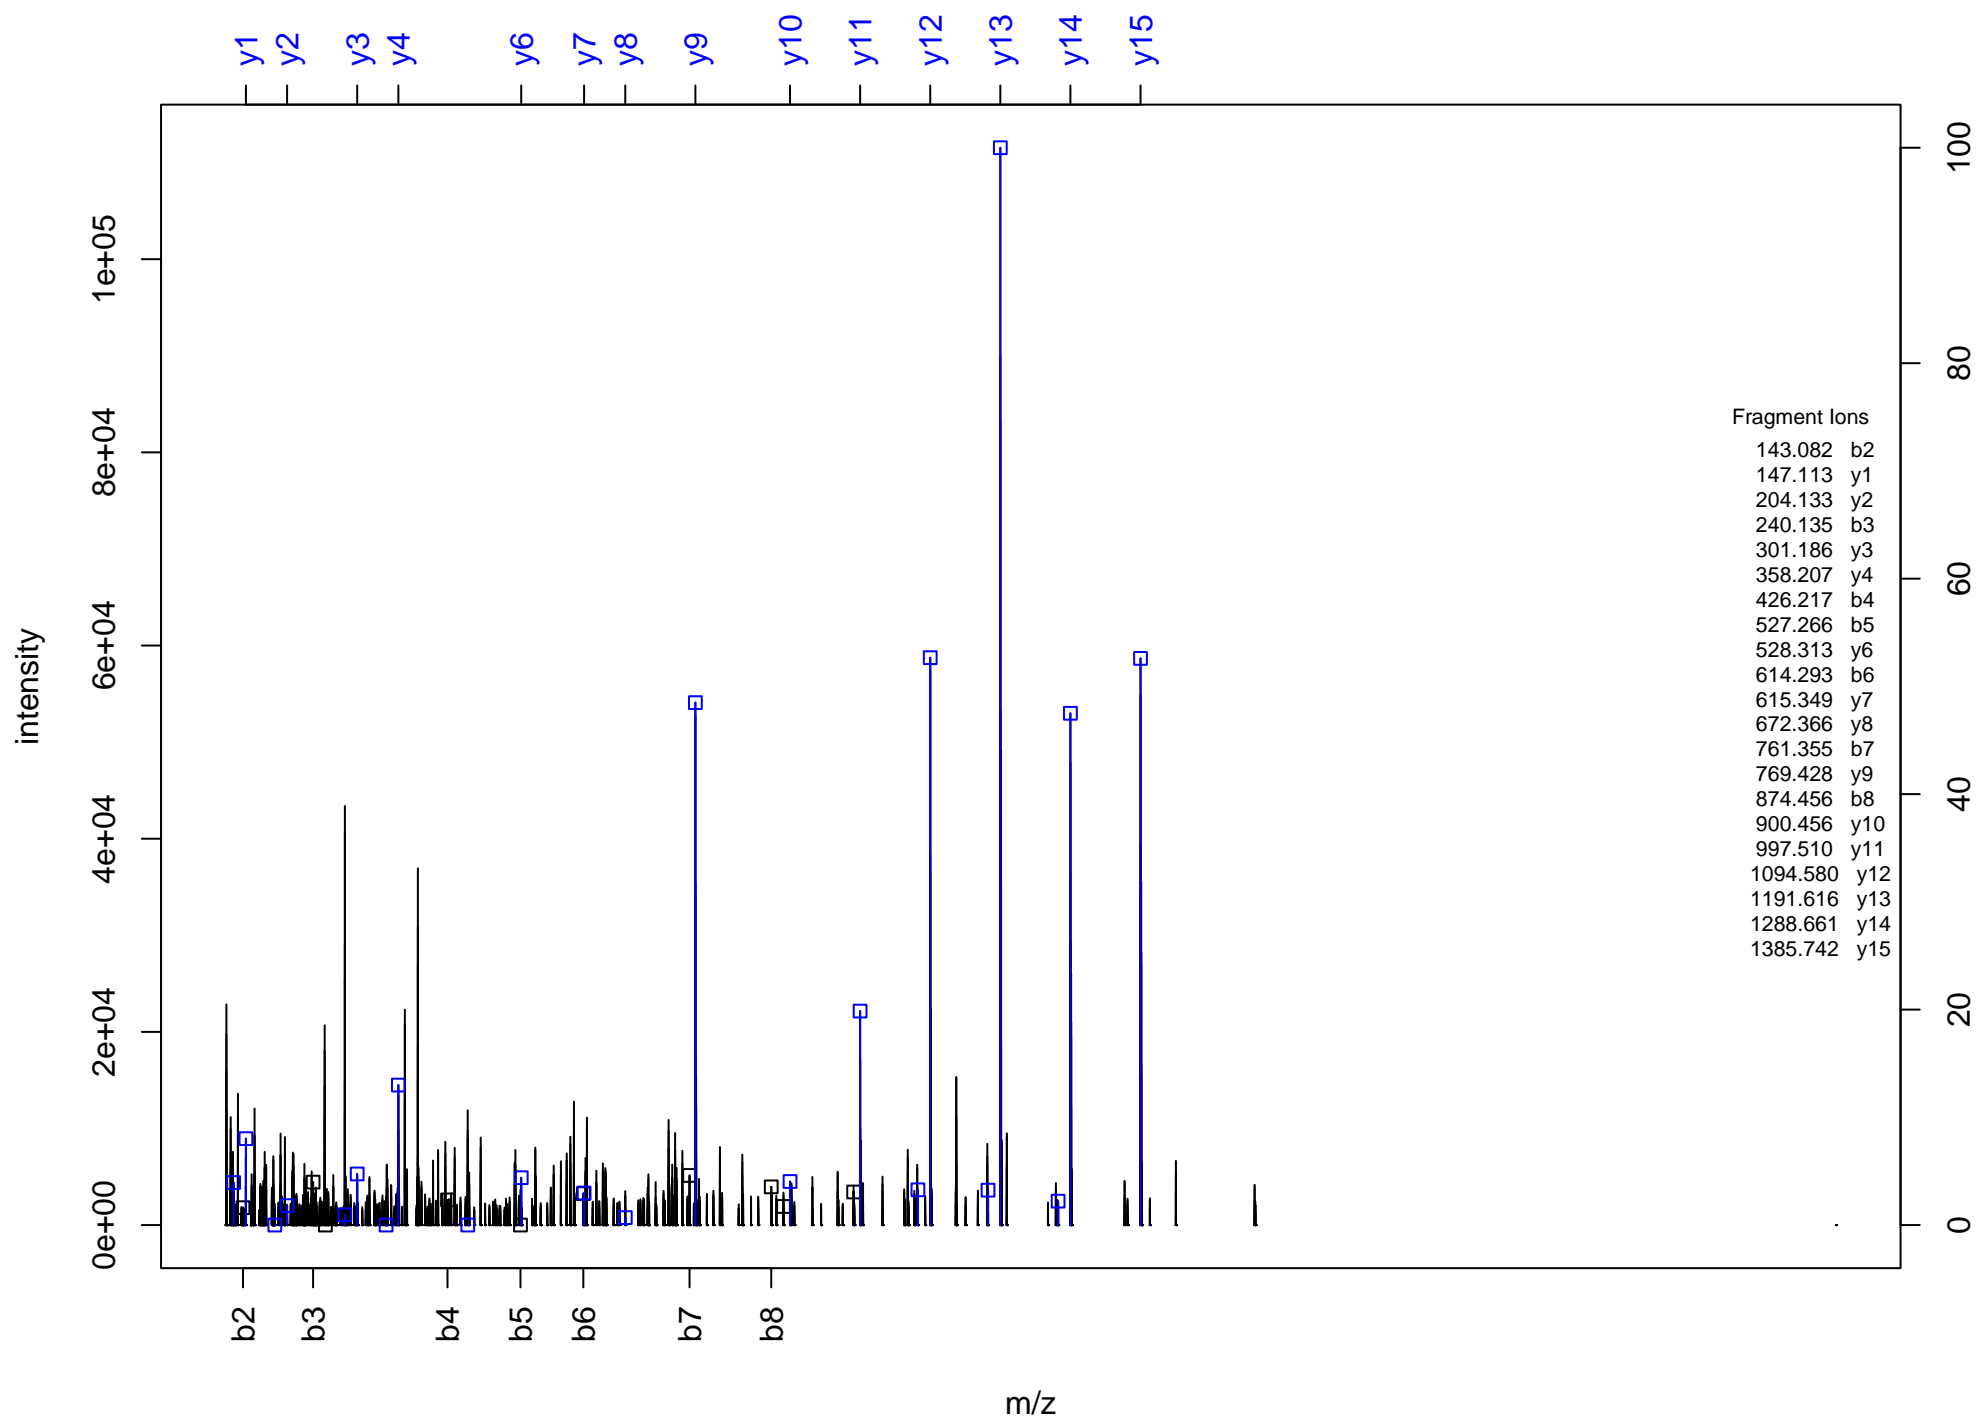

# AYAEFYR

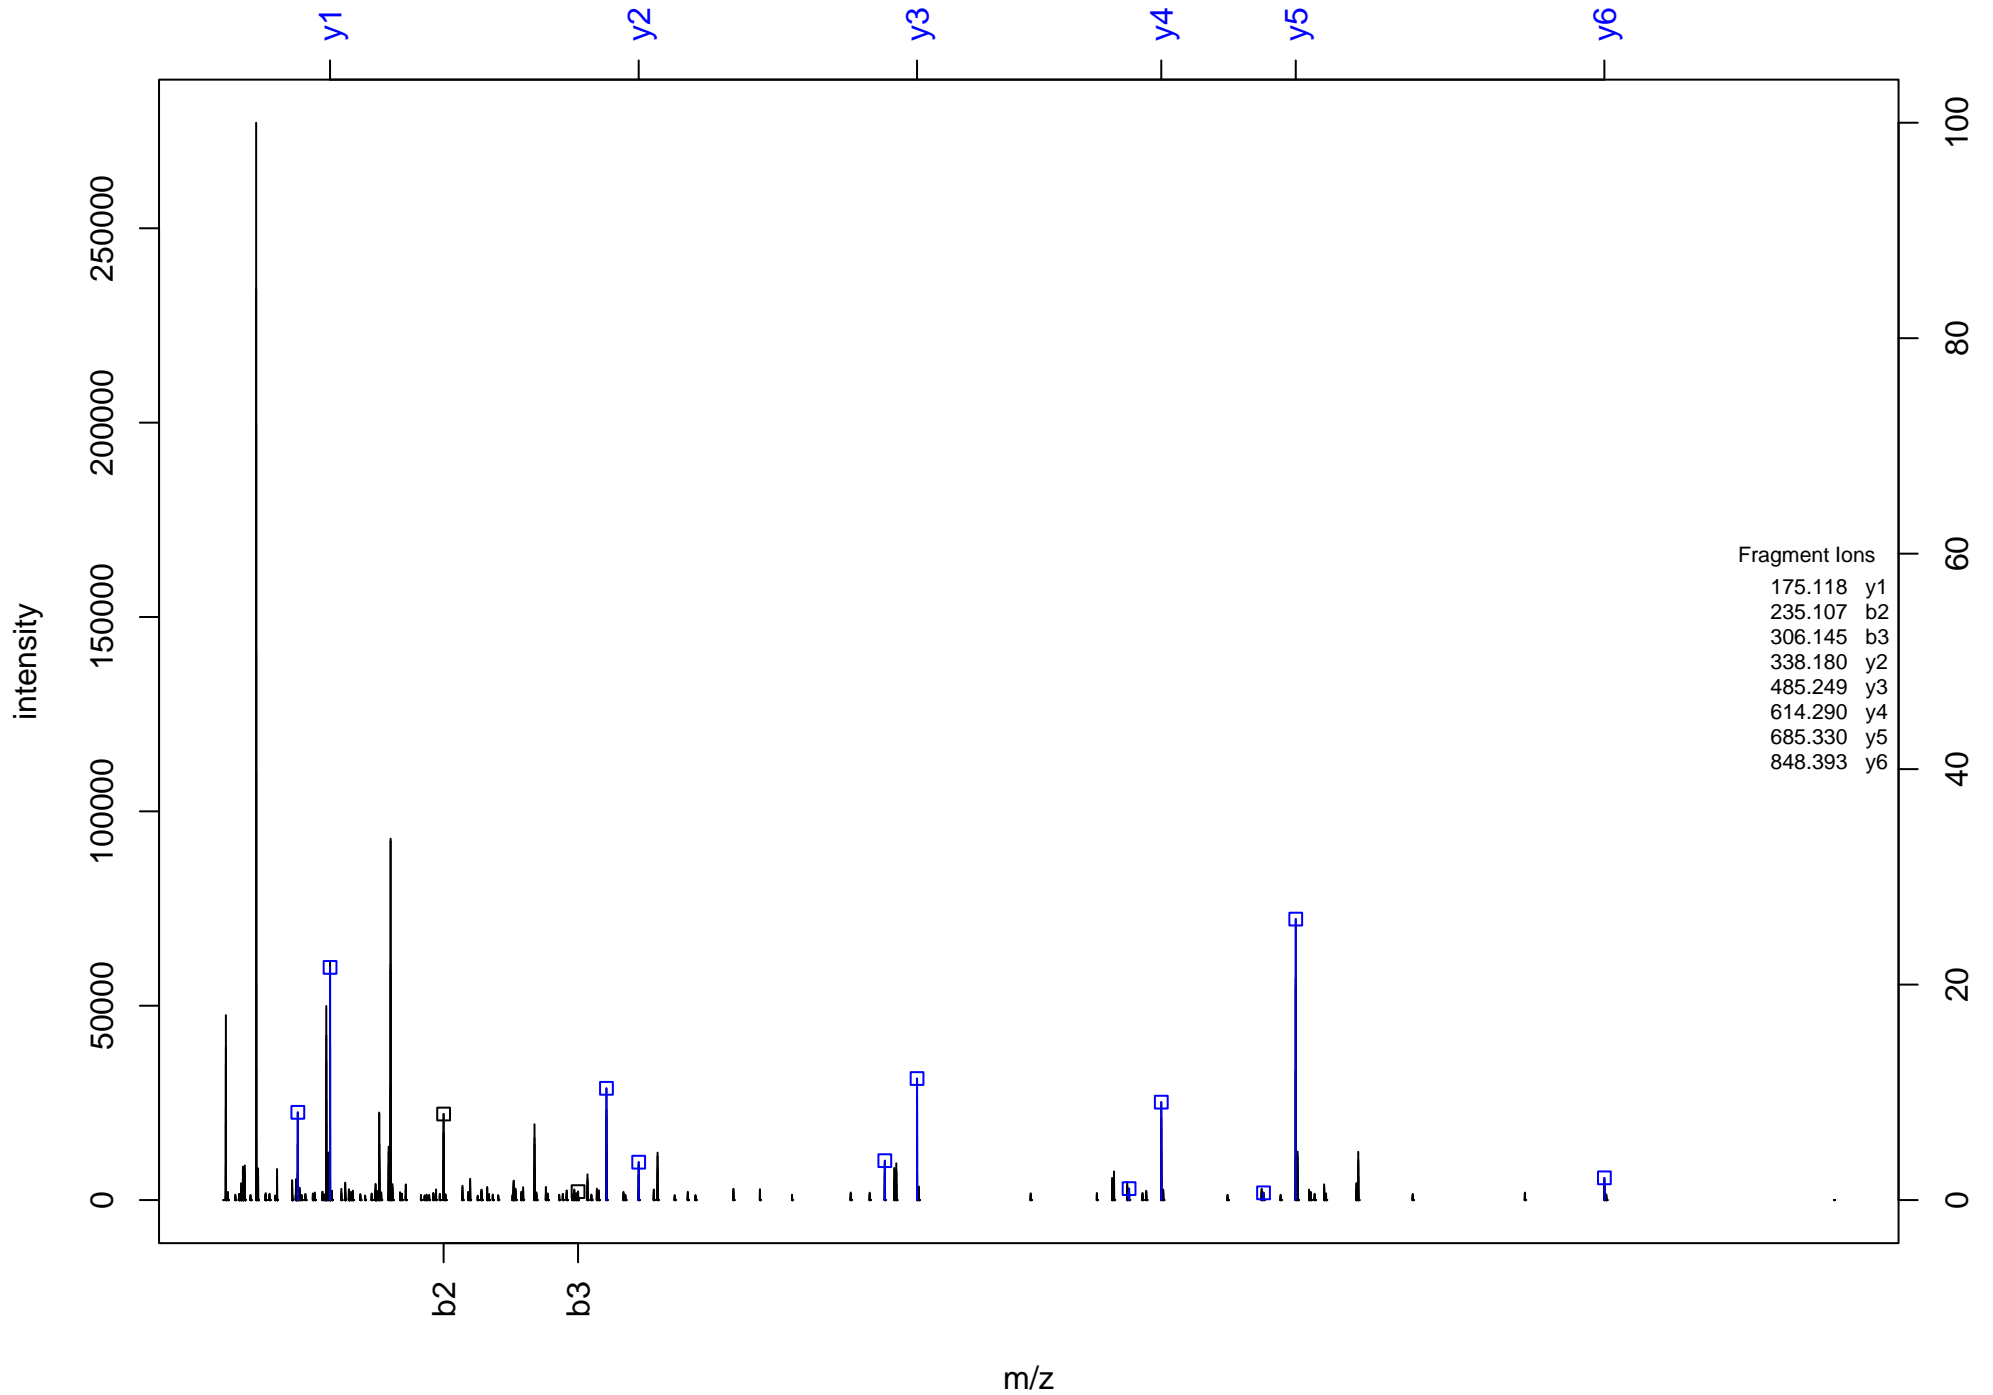

# VEYPVMYSTDPENGMFNCIQR

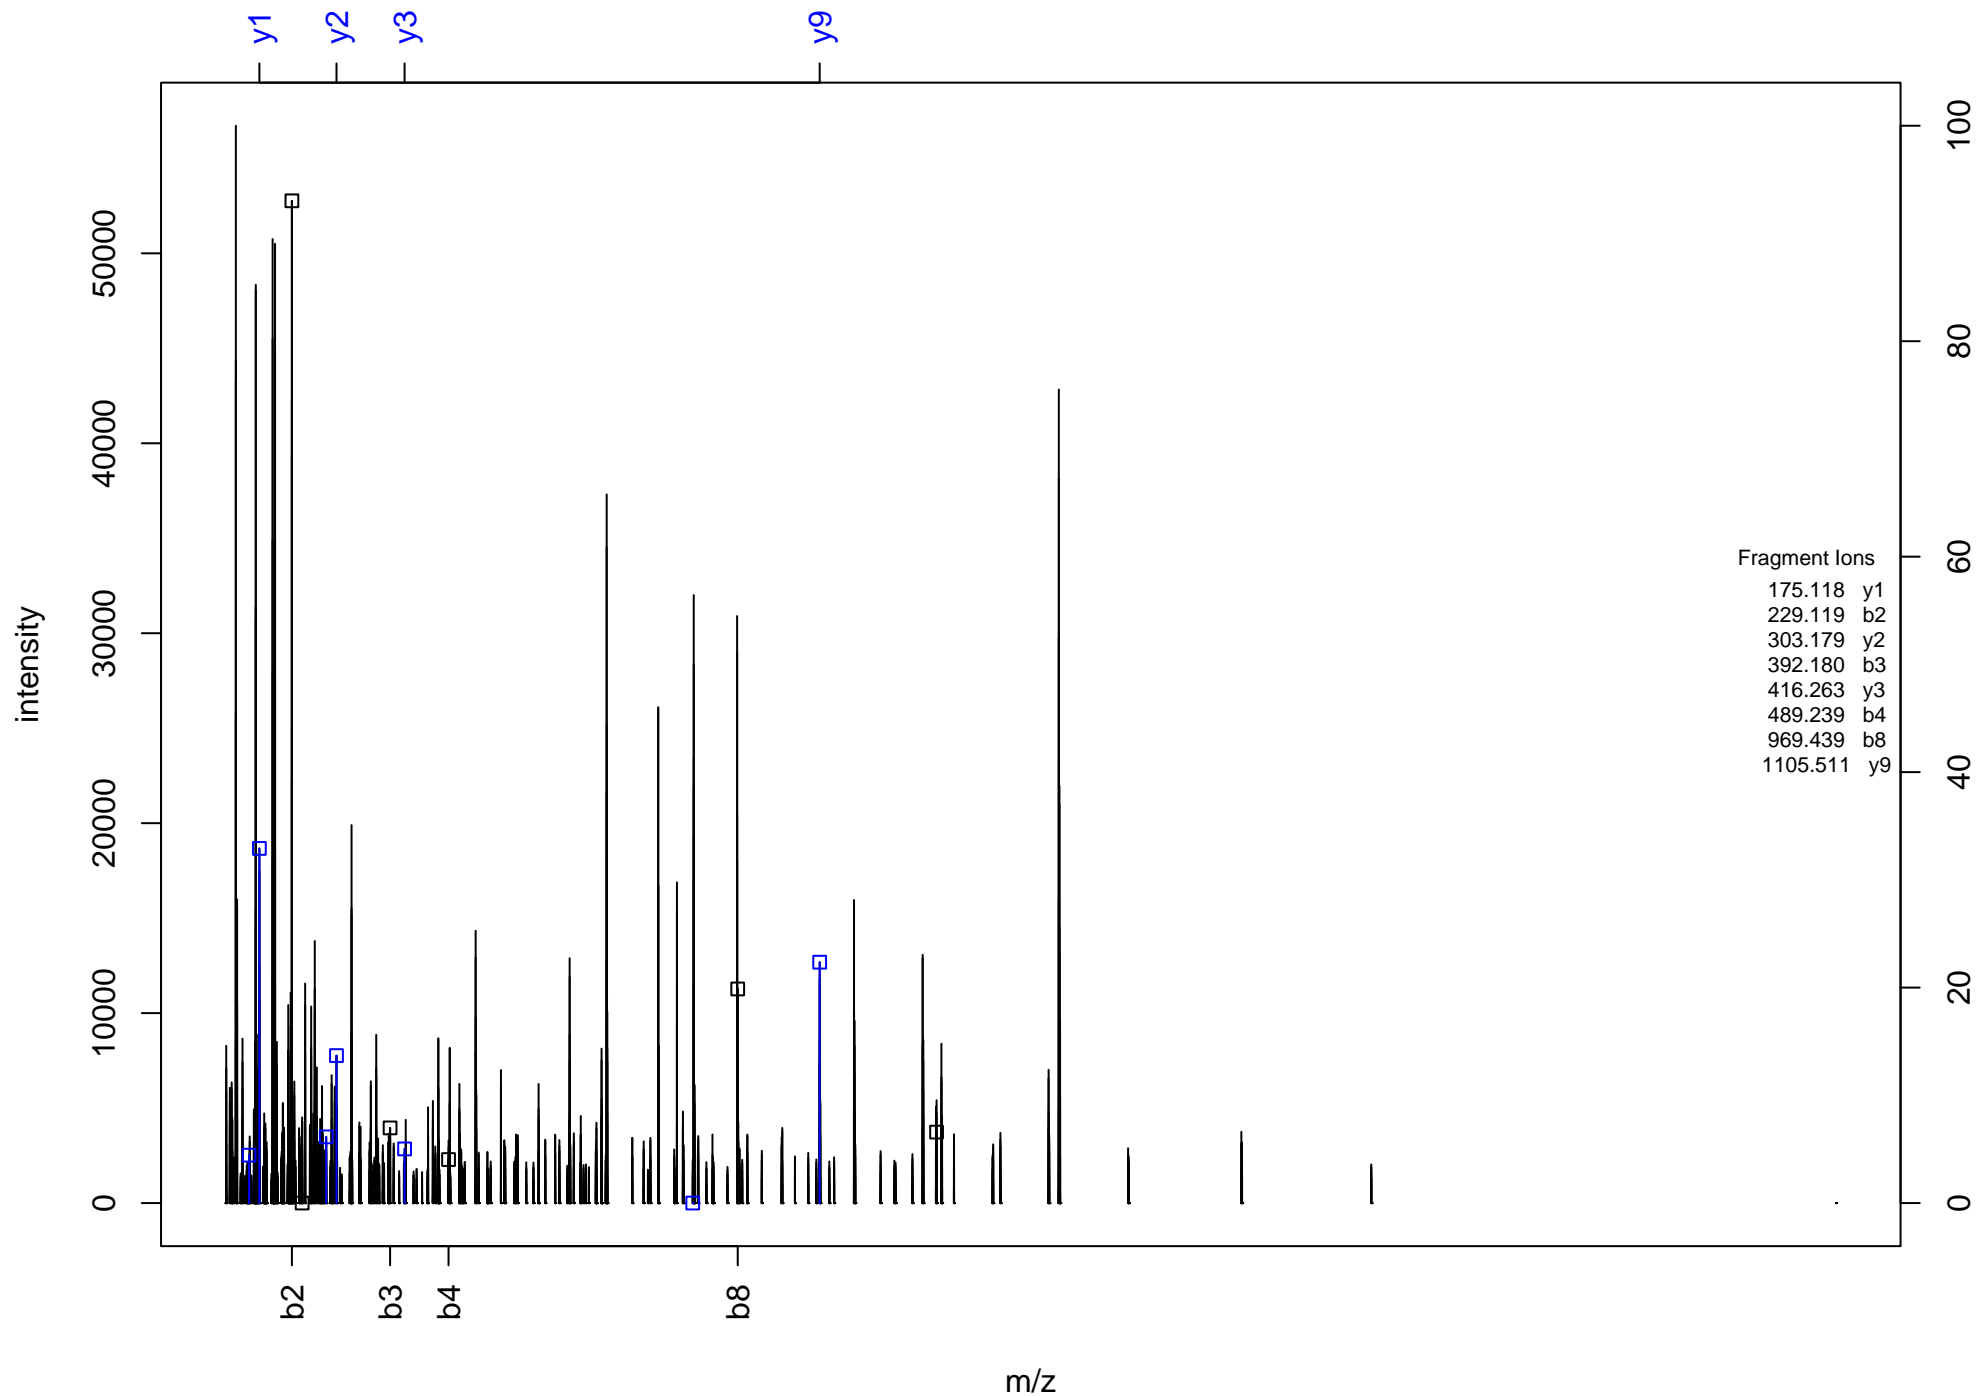



# ELQSQIVEAR

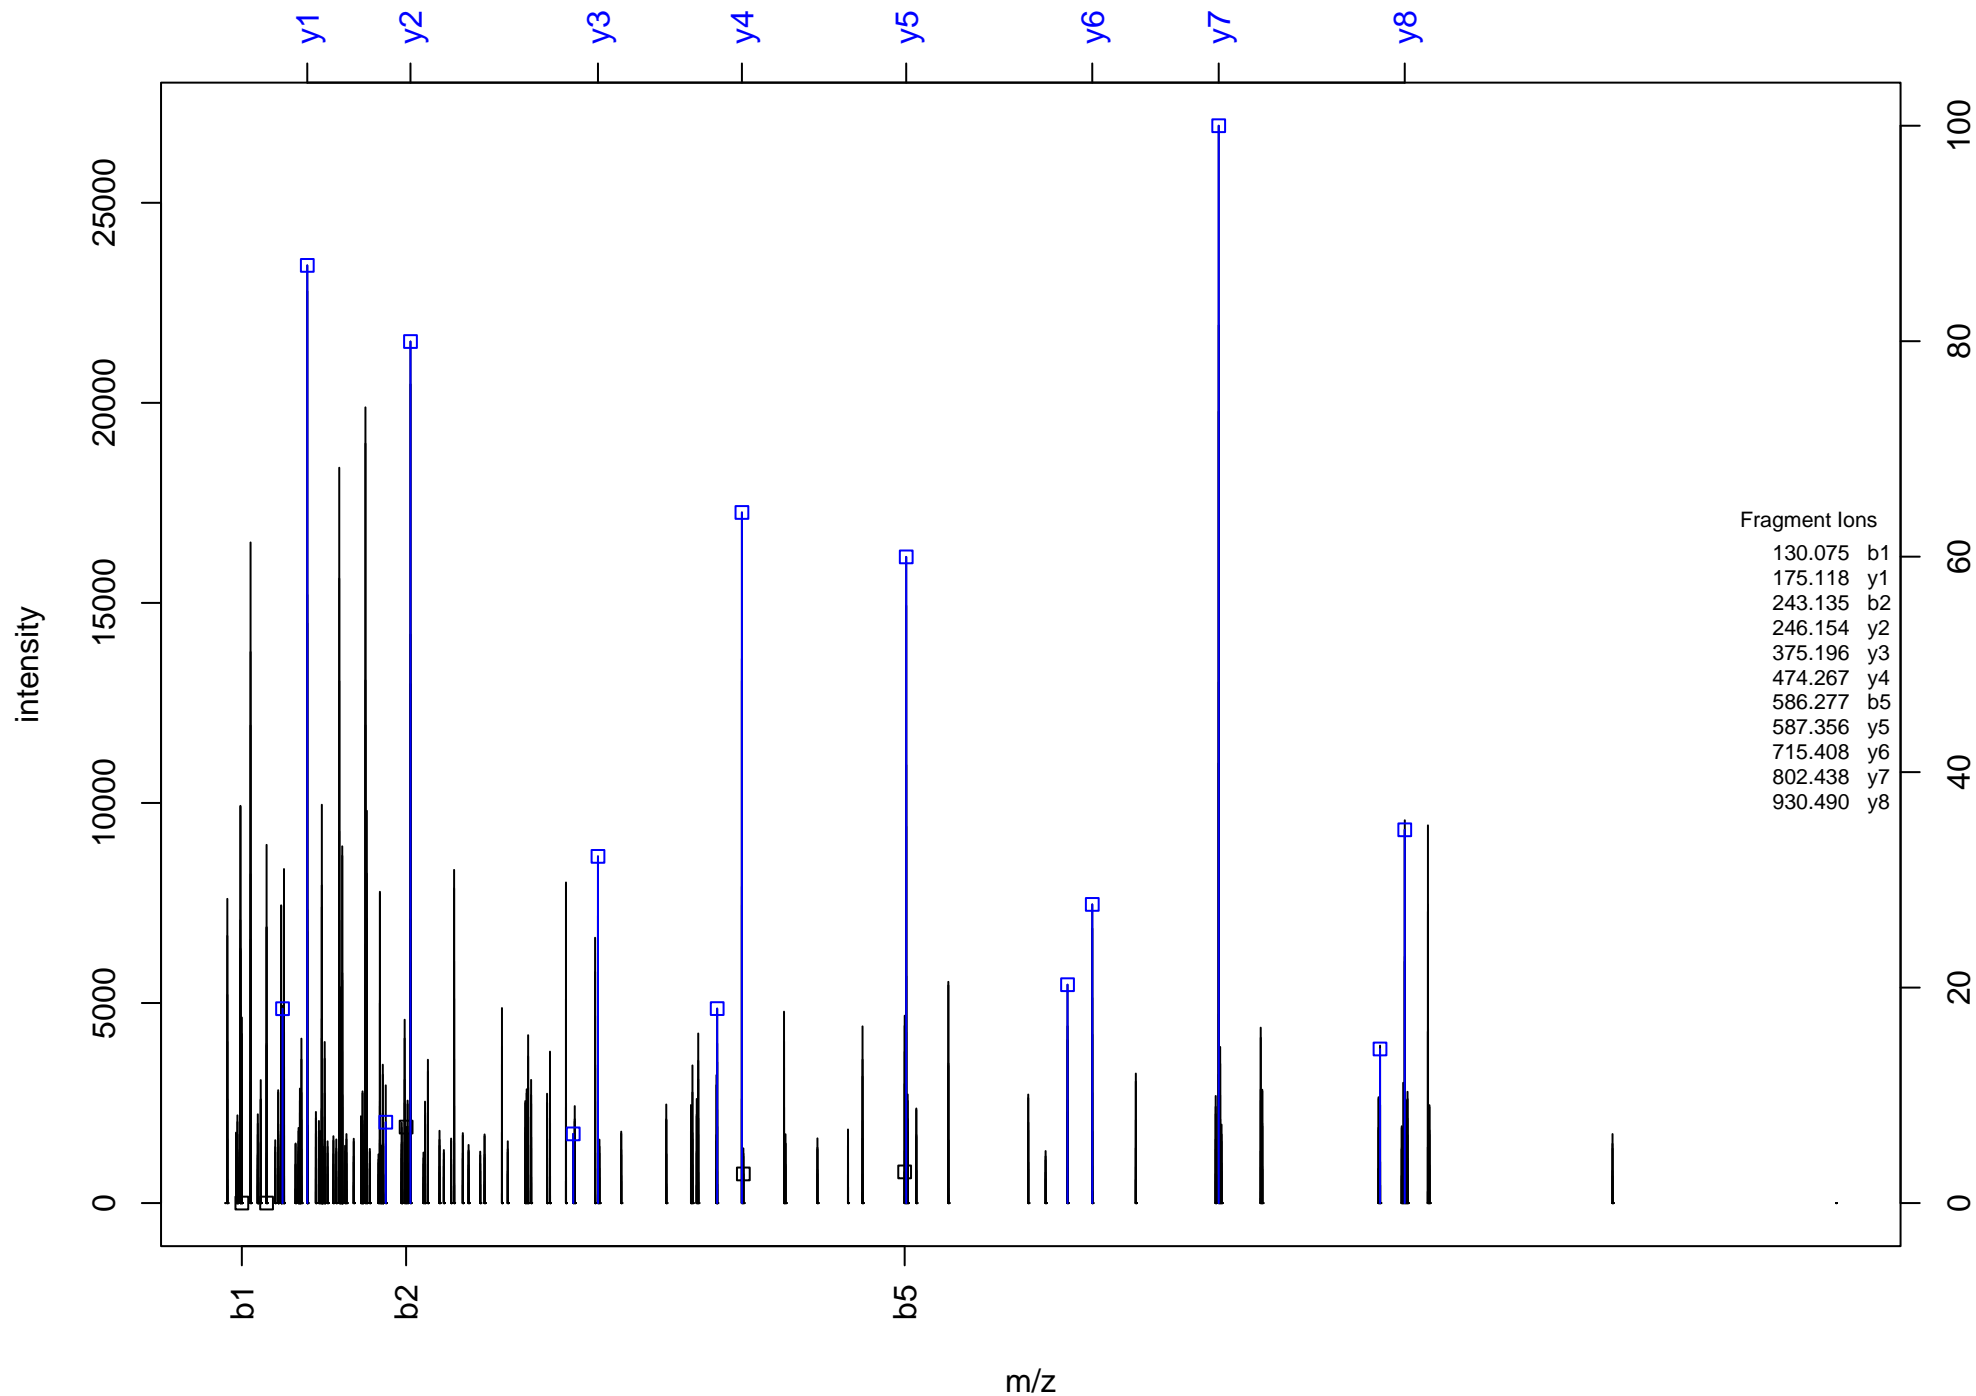

# ELGENLTDEELQEMIDEADRDGDGEVNEQEFLR

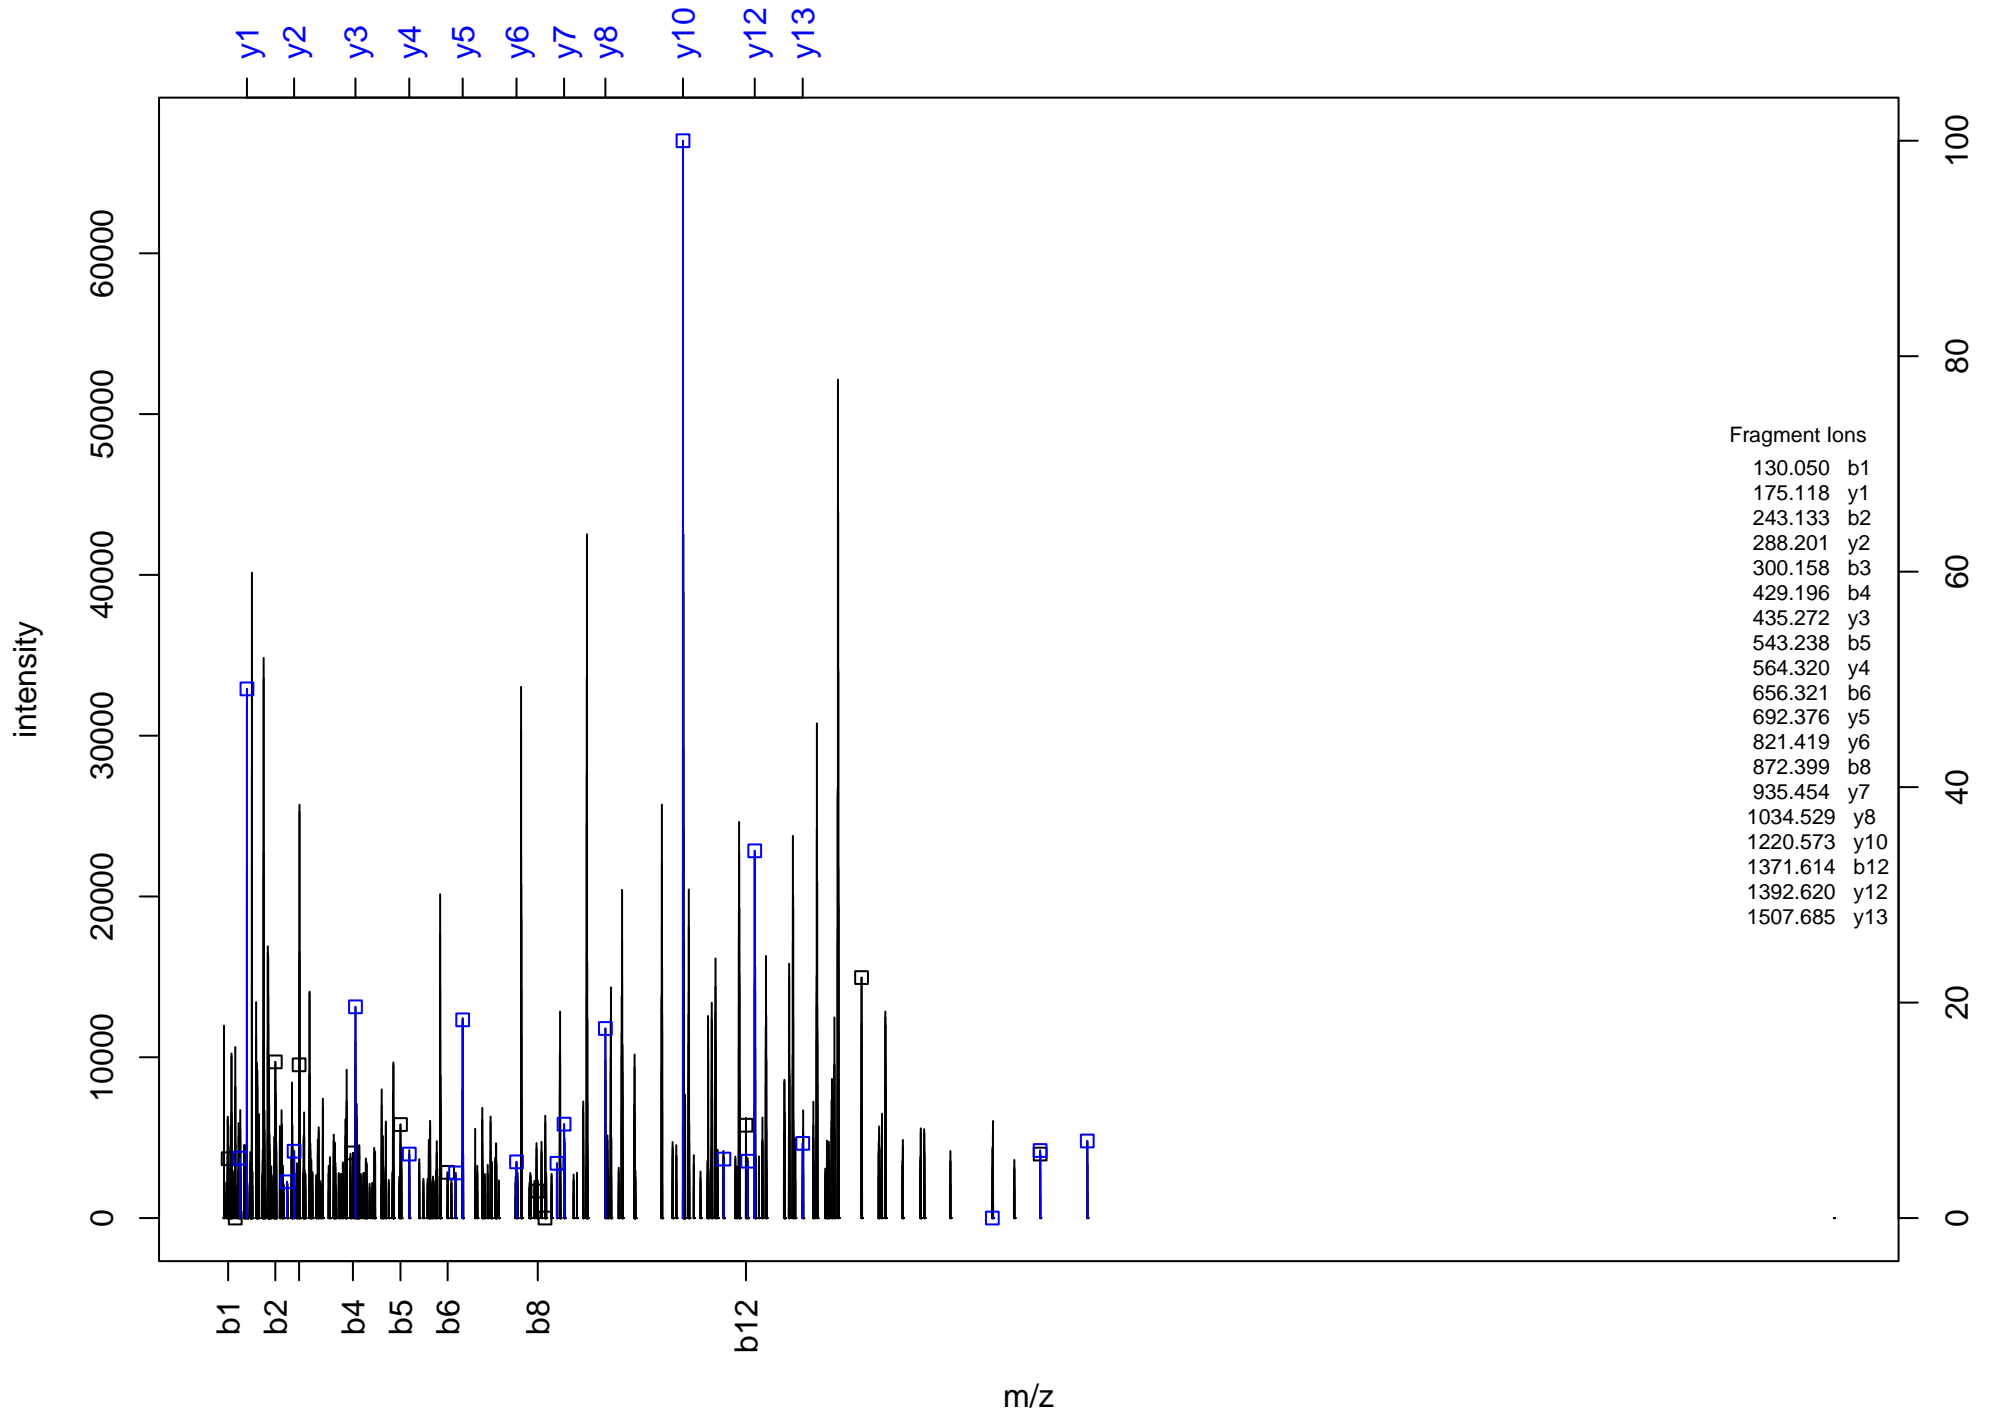

# FASAQFPNGPQFTEDHSQLPSSQLPSSPFGDYR

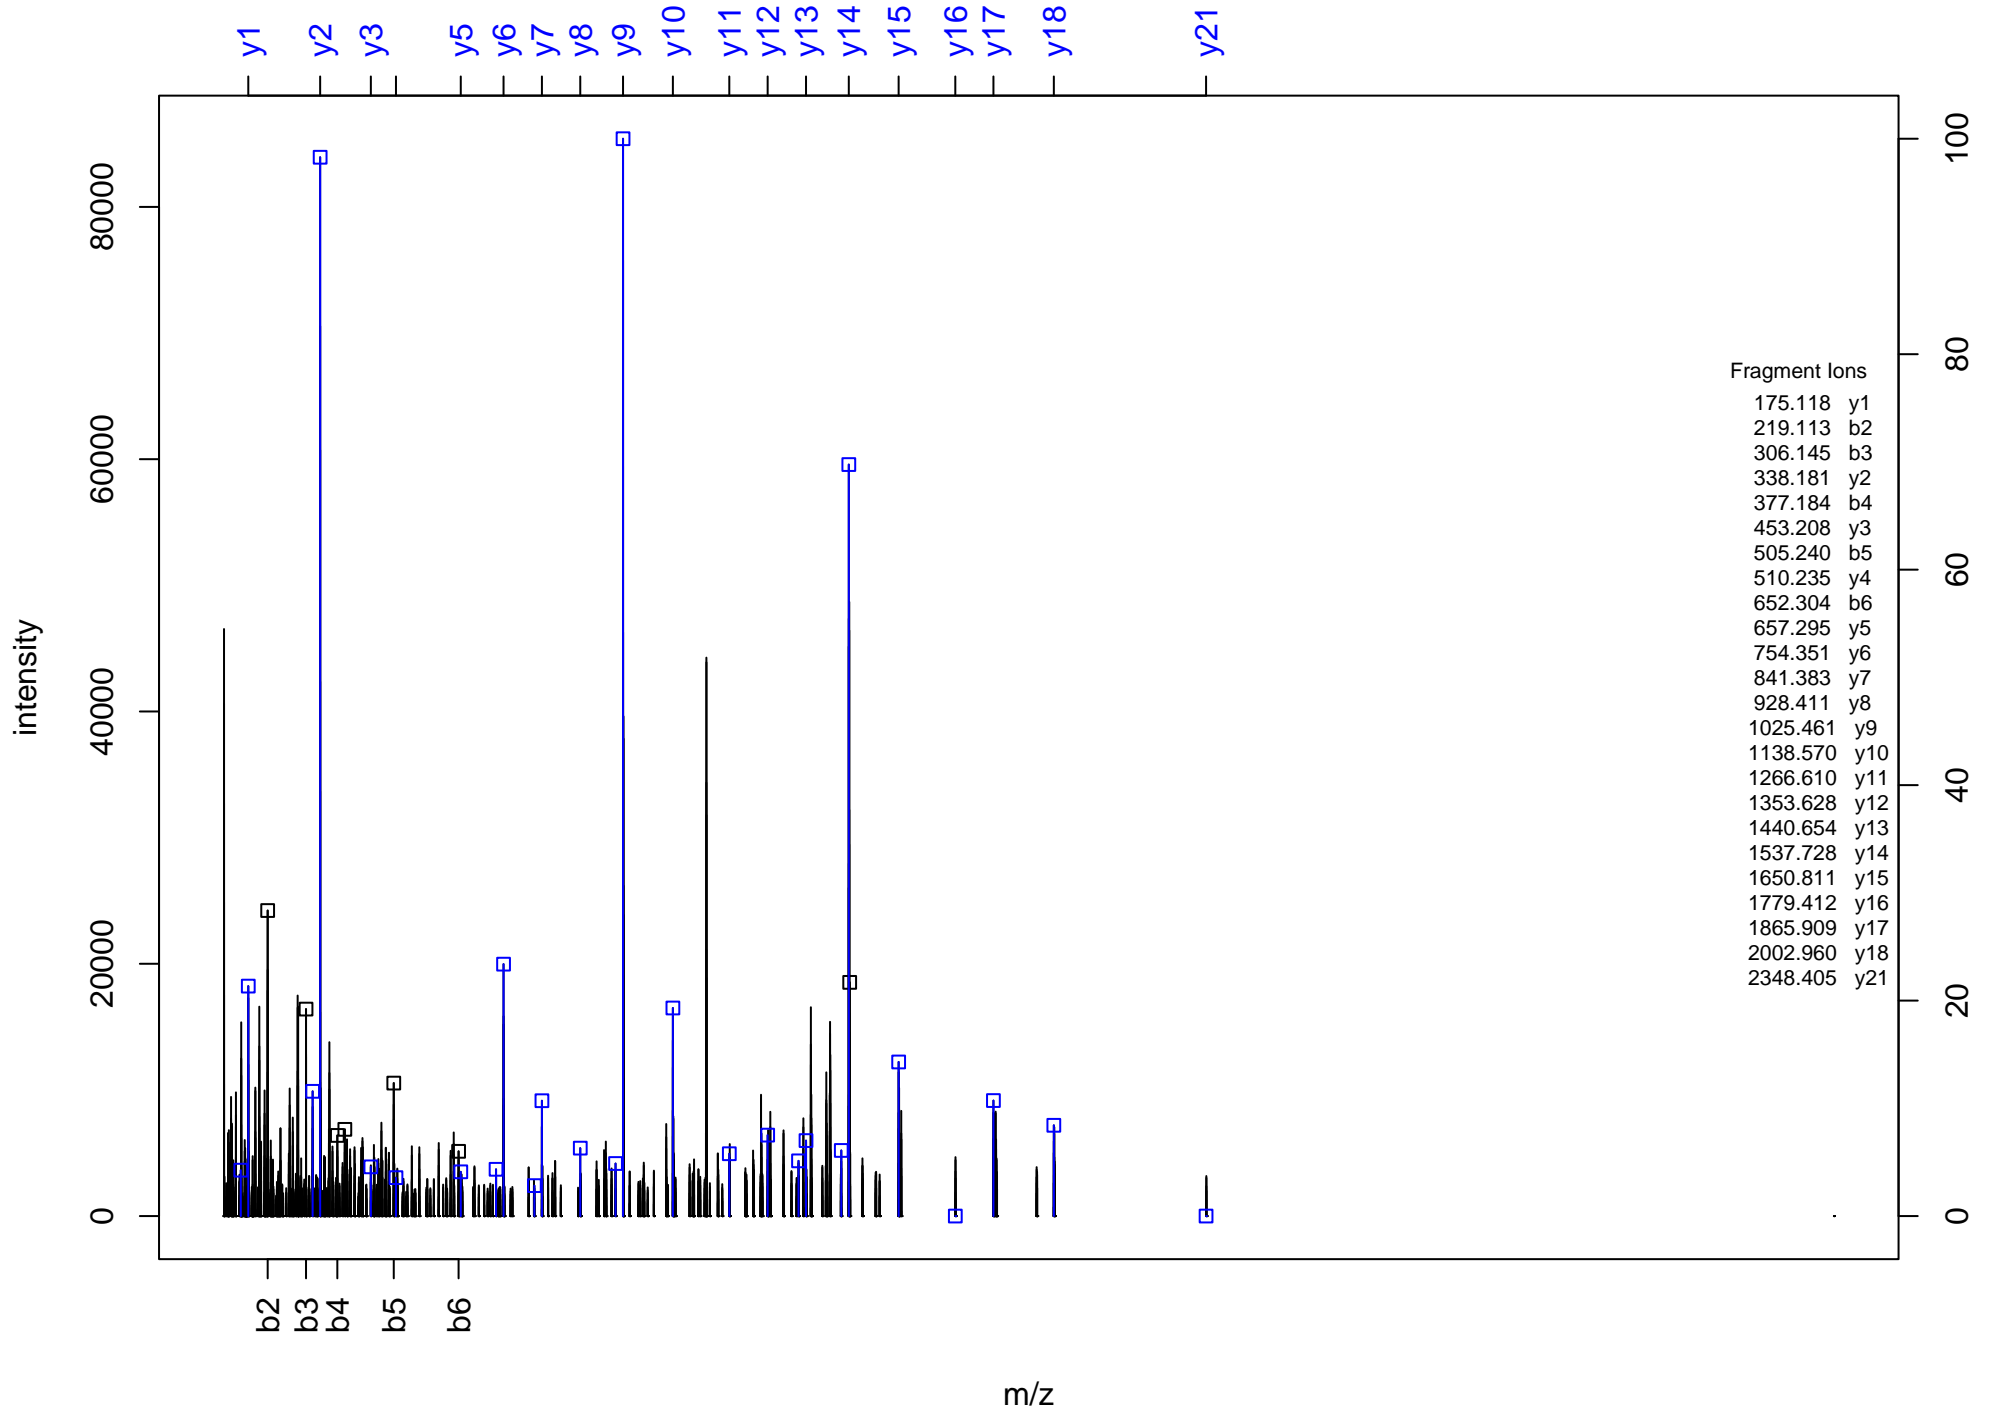

# FAEFEDFPETSEPVWILGR

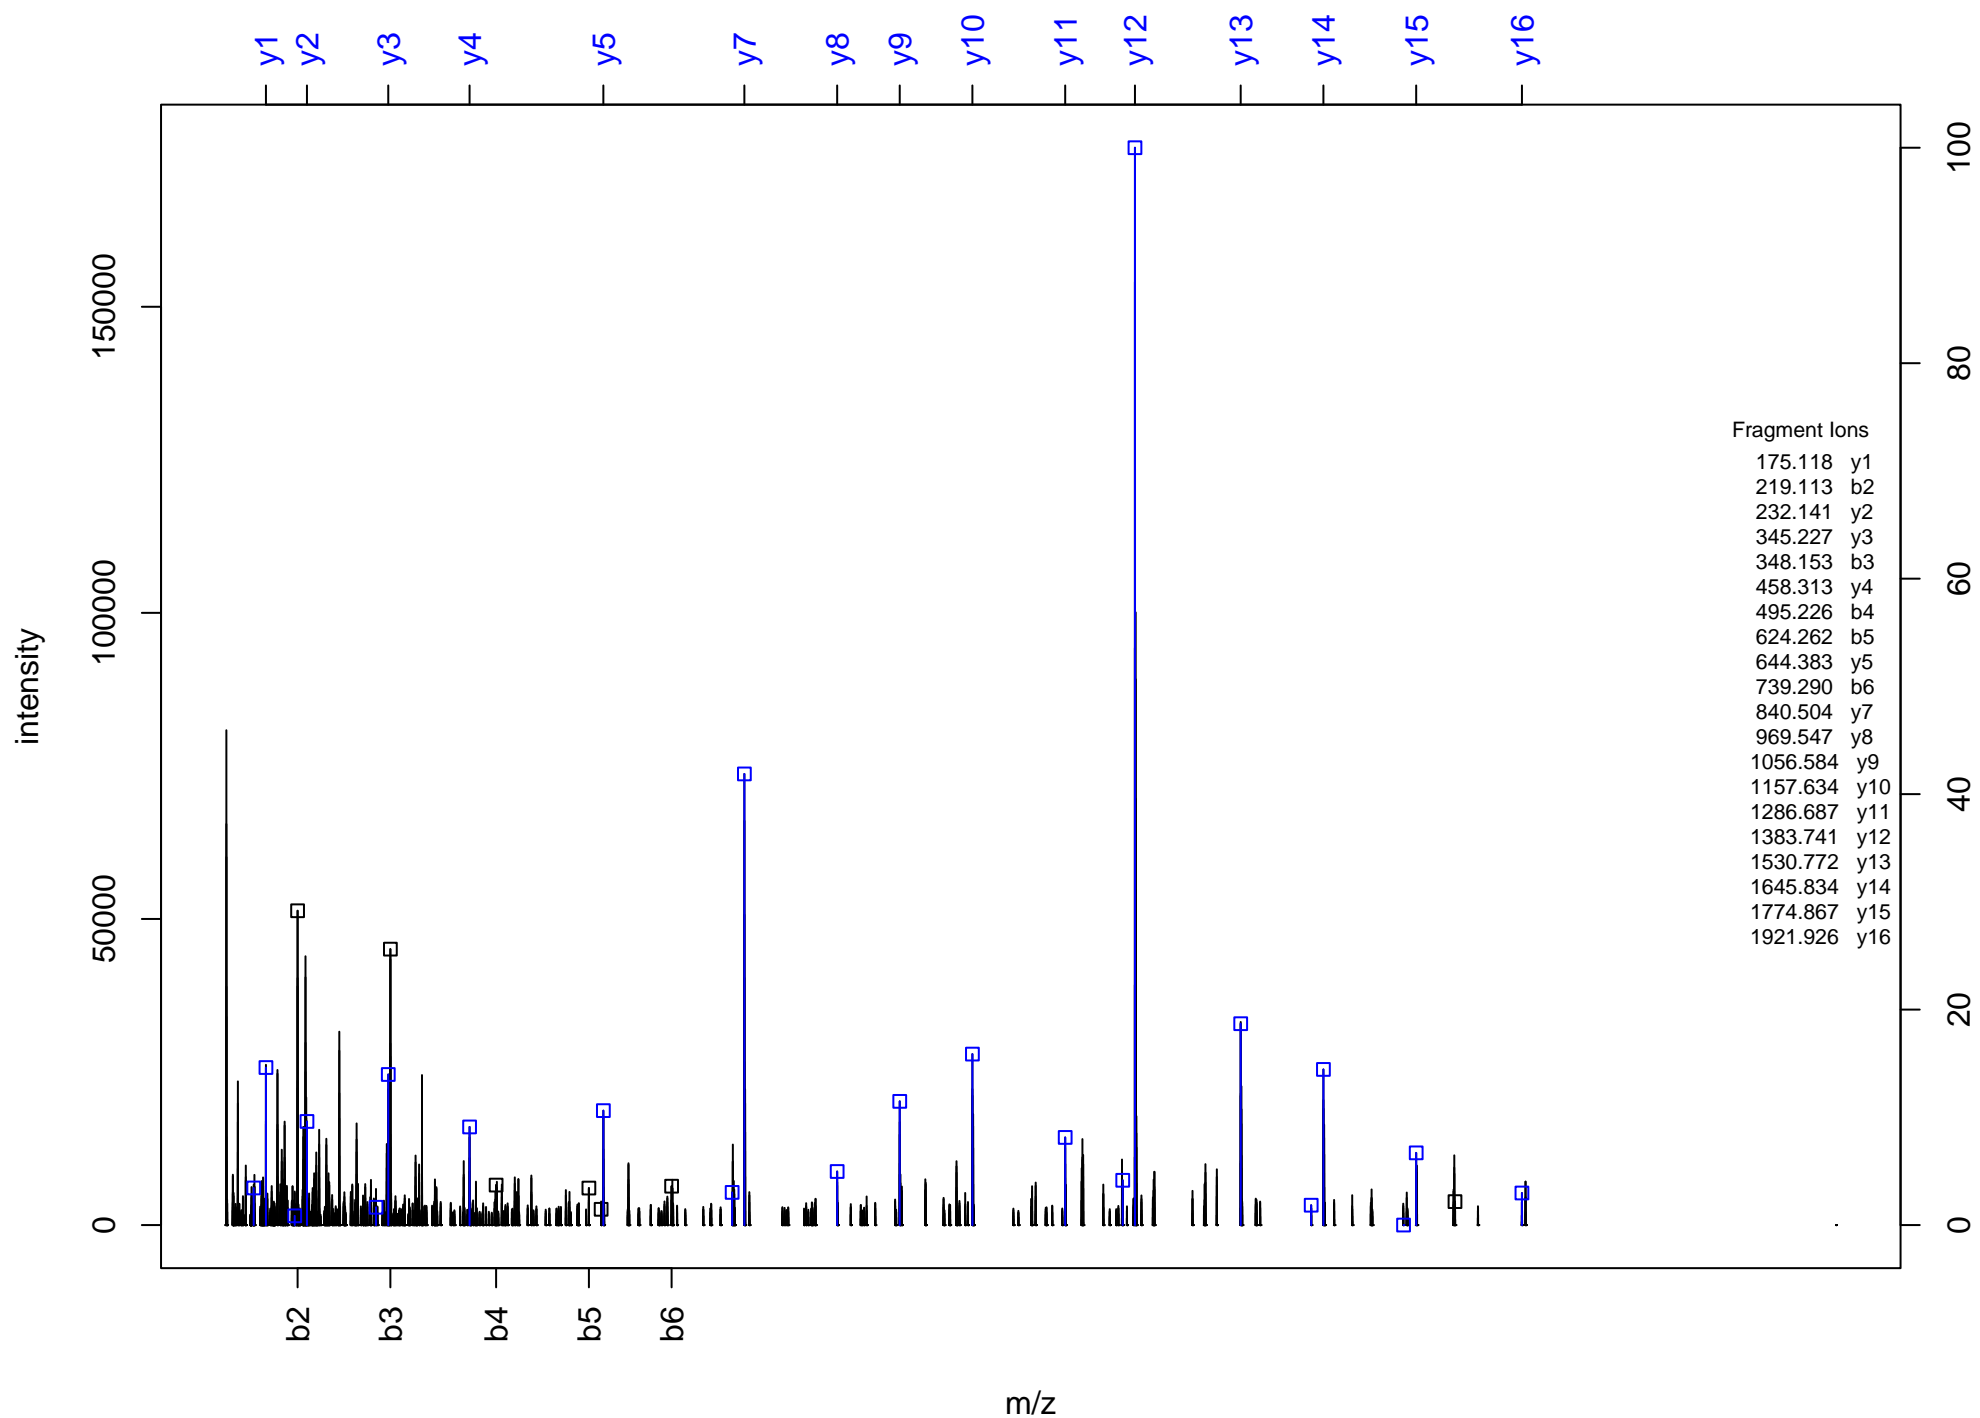

# VMFSPFGQIEECR

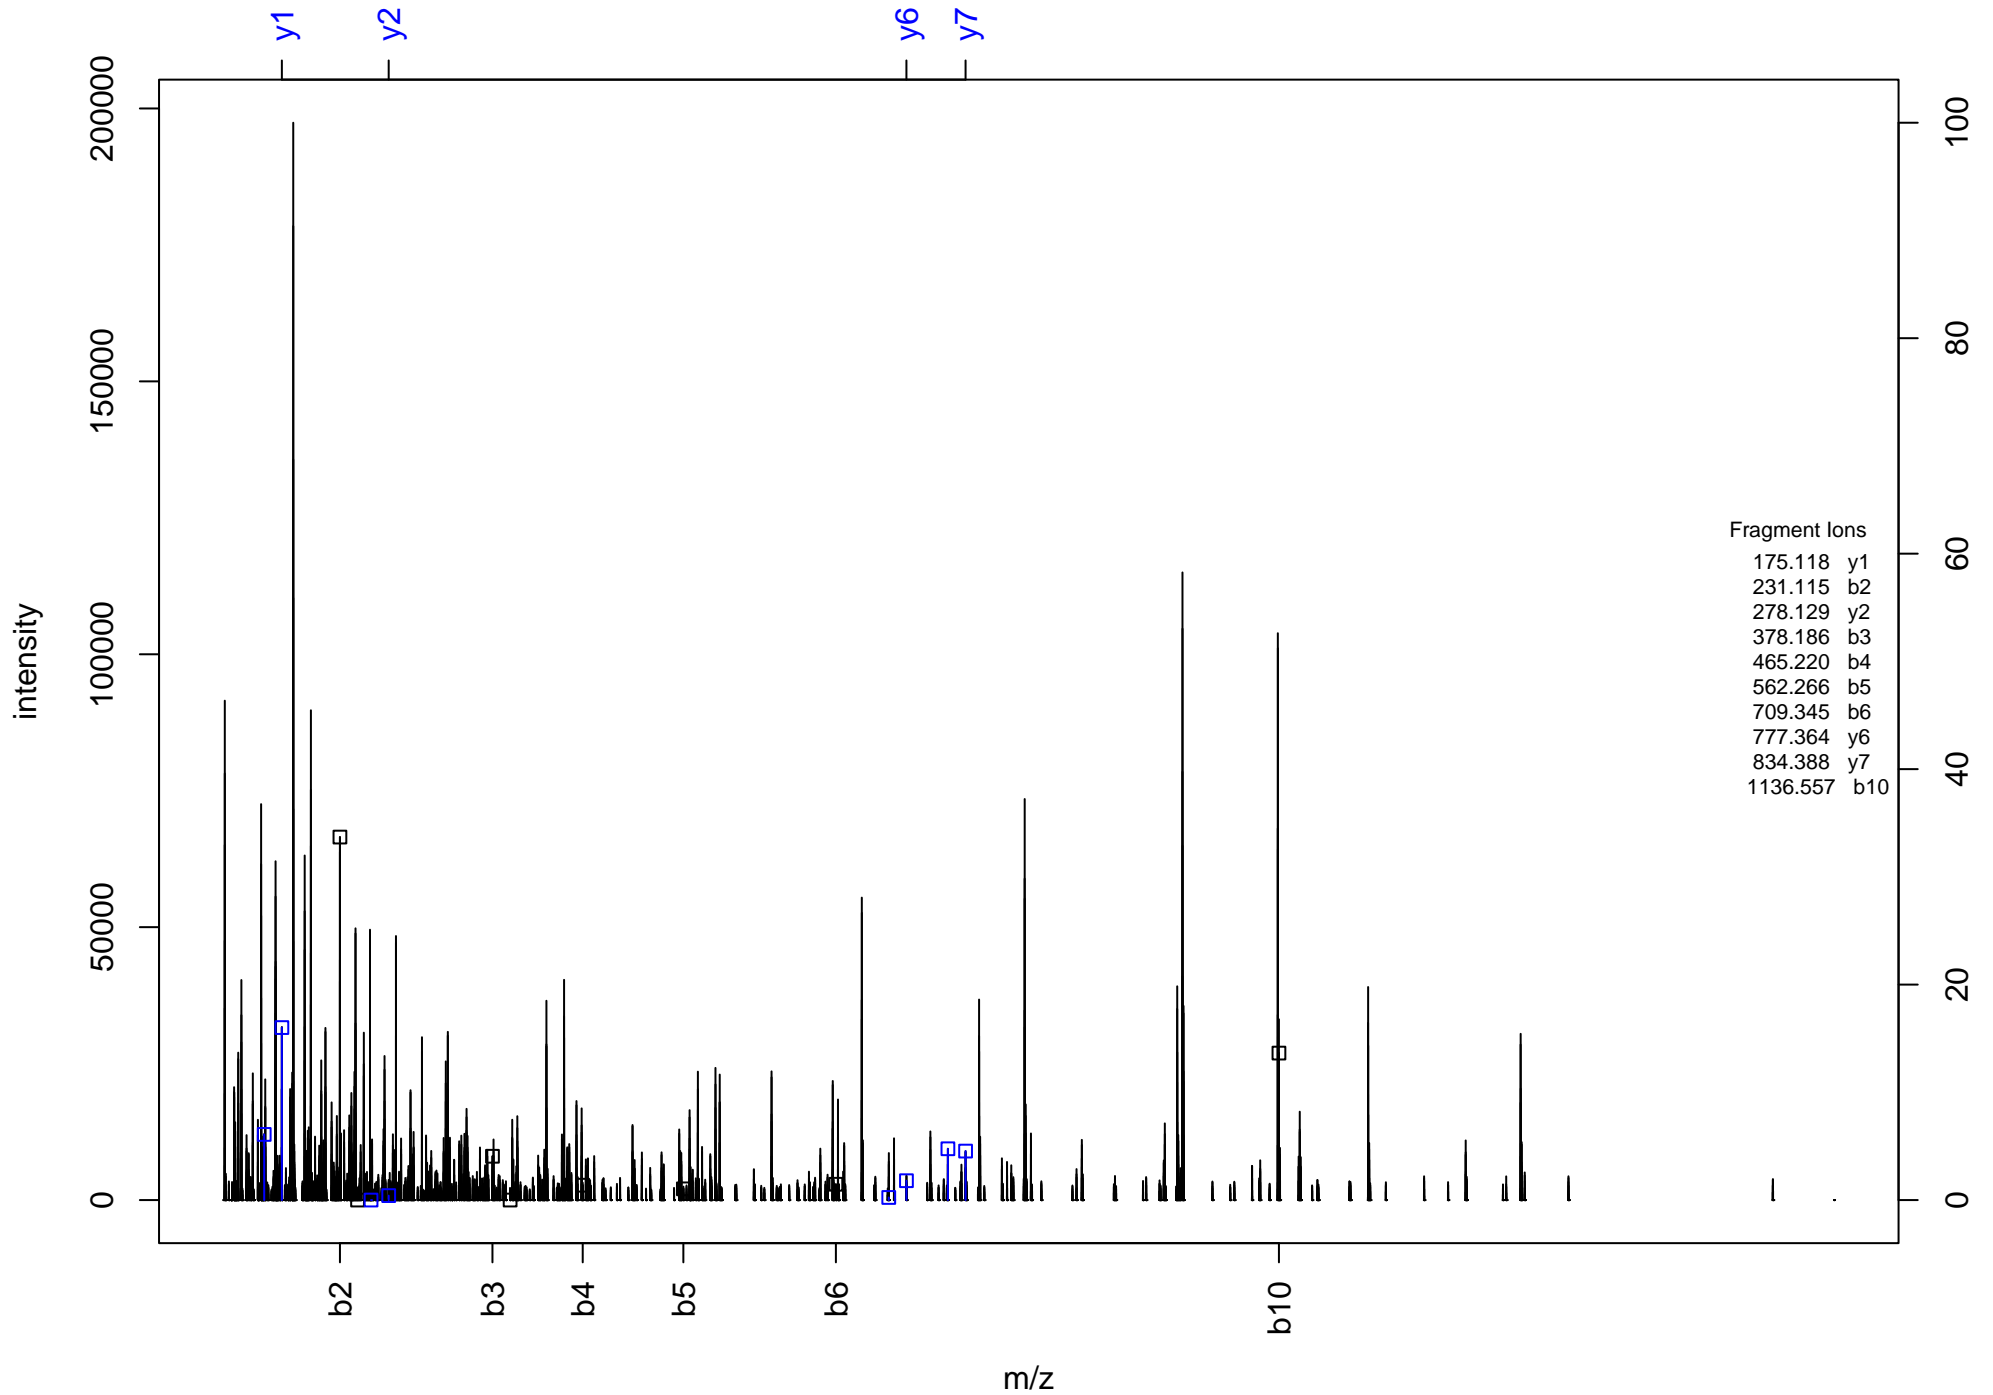

# LLYPPETGLFLVR

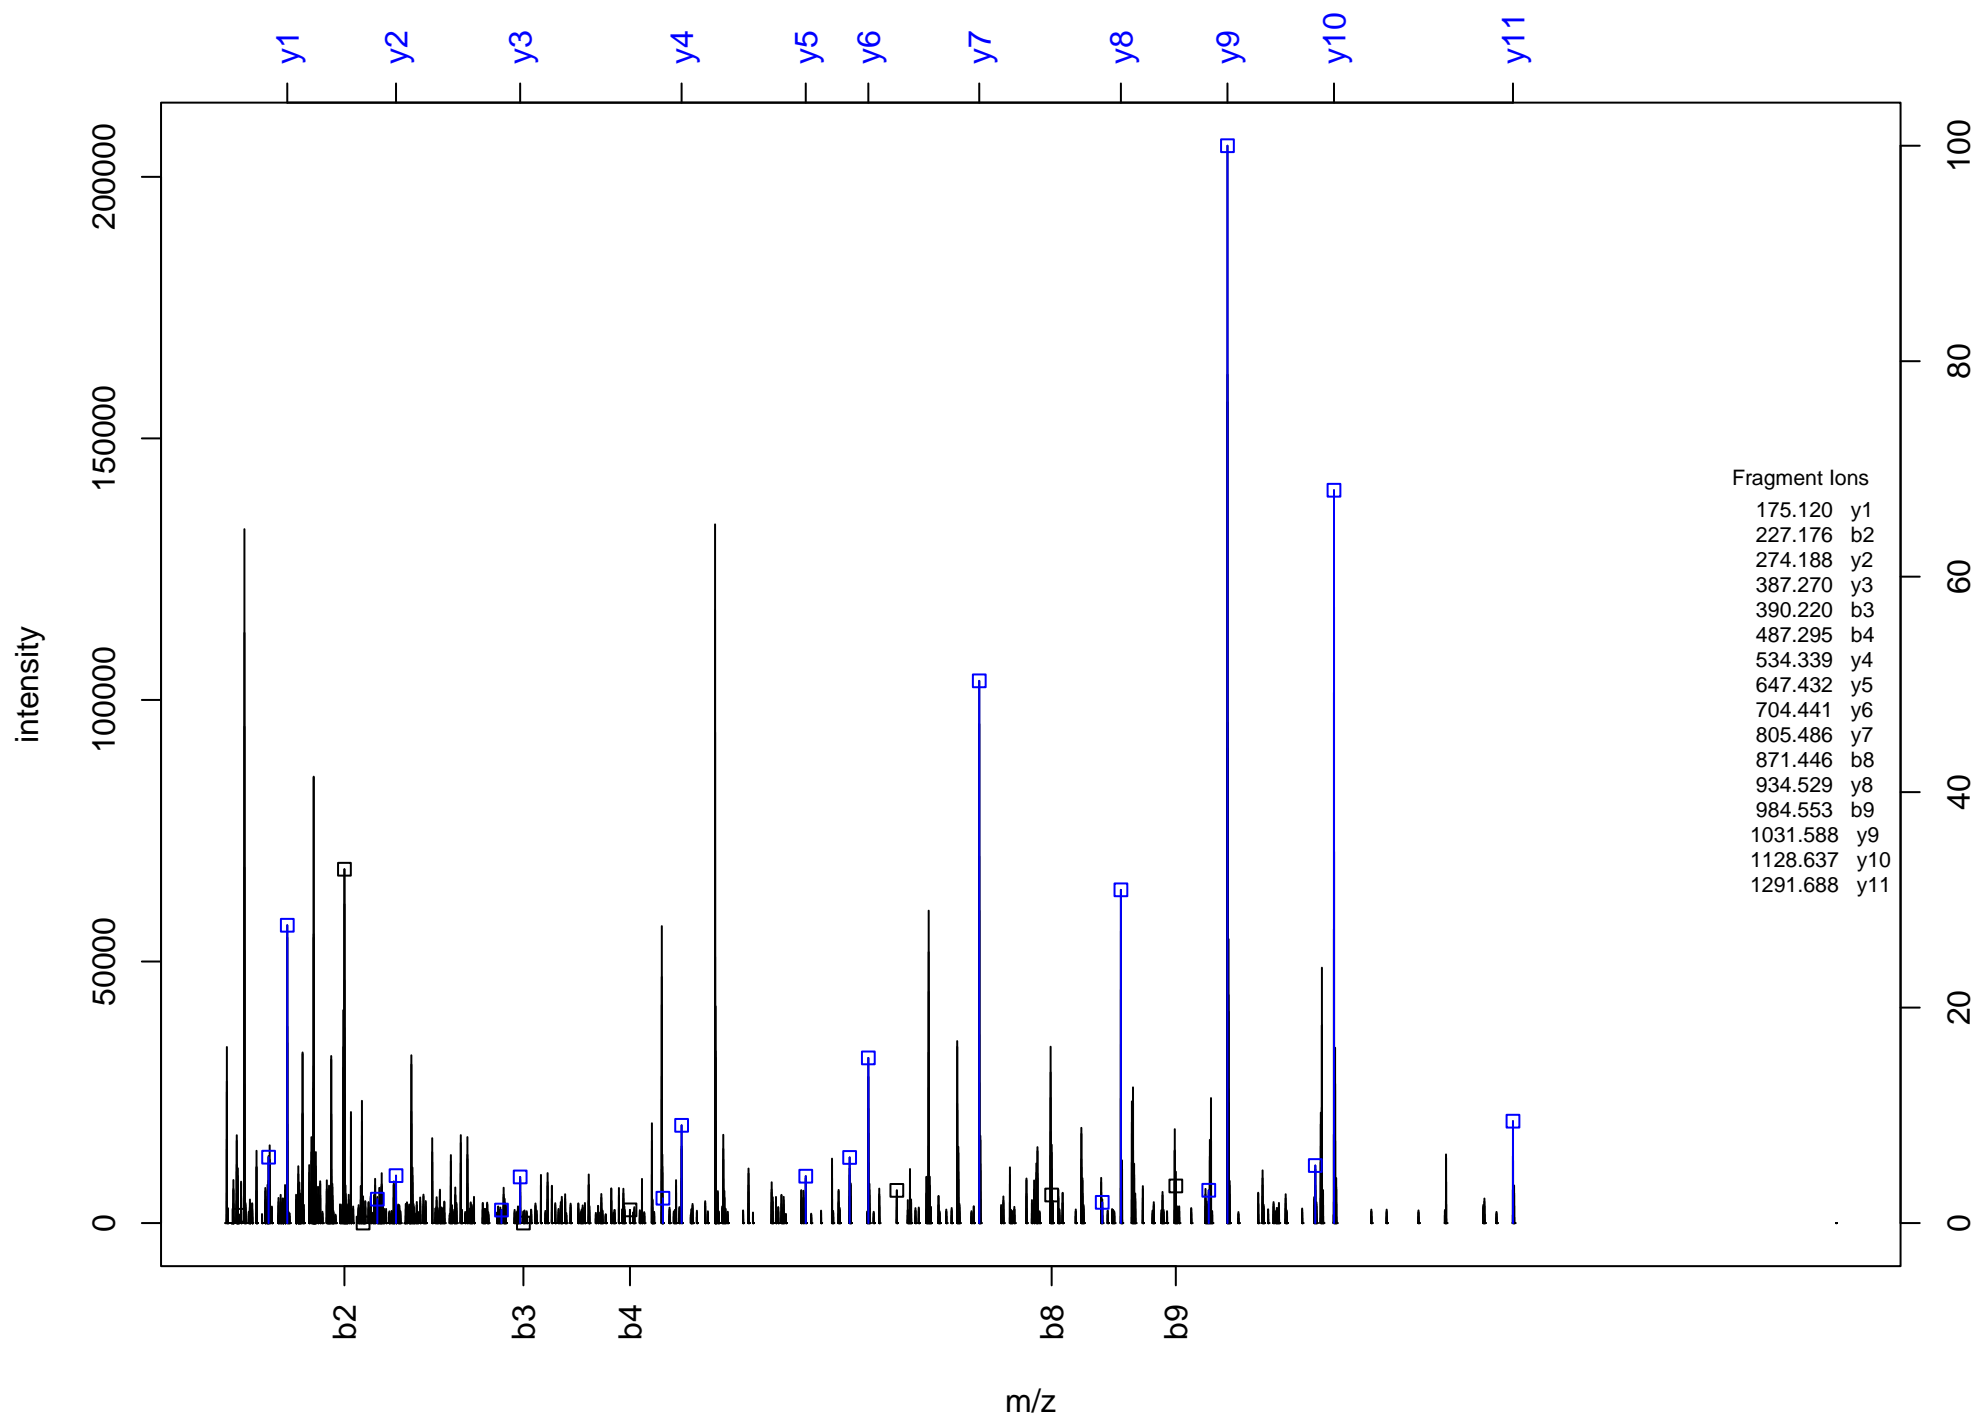

# GEDGQPADTGSDSILASTFSK

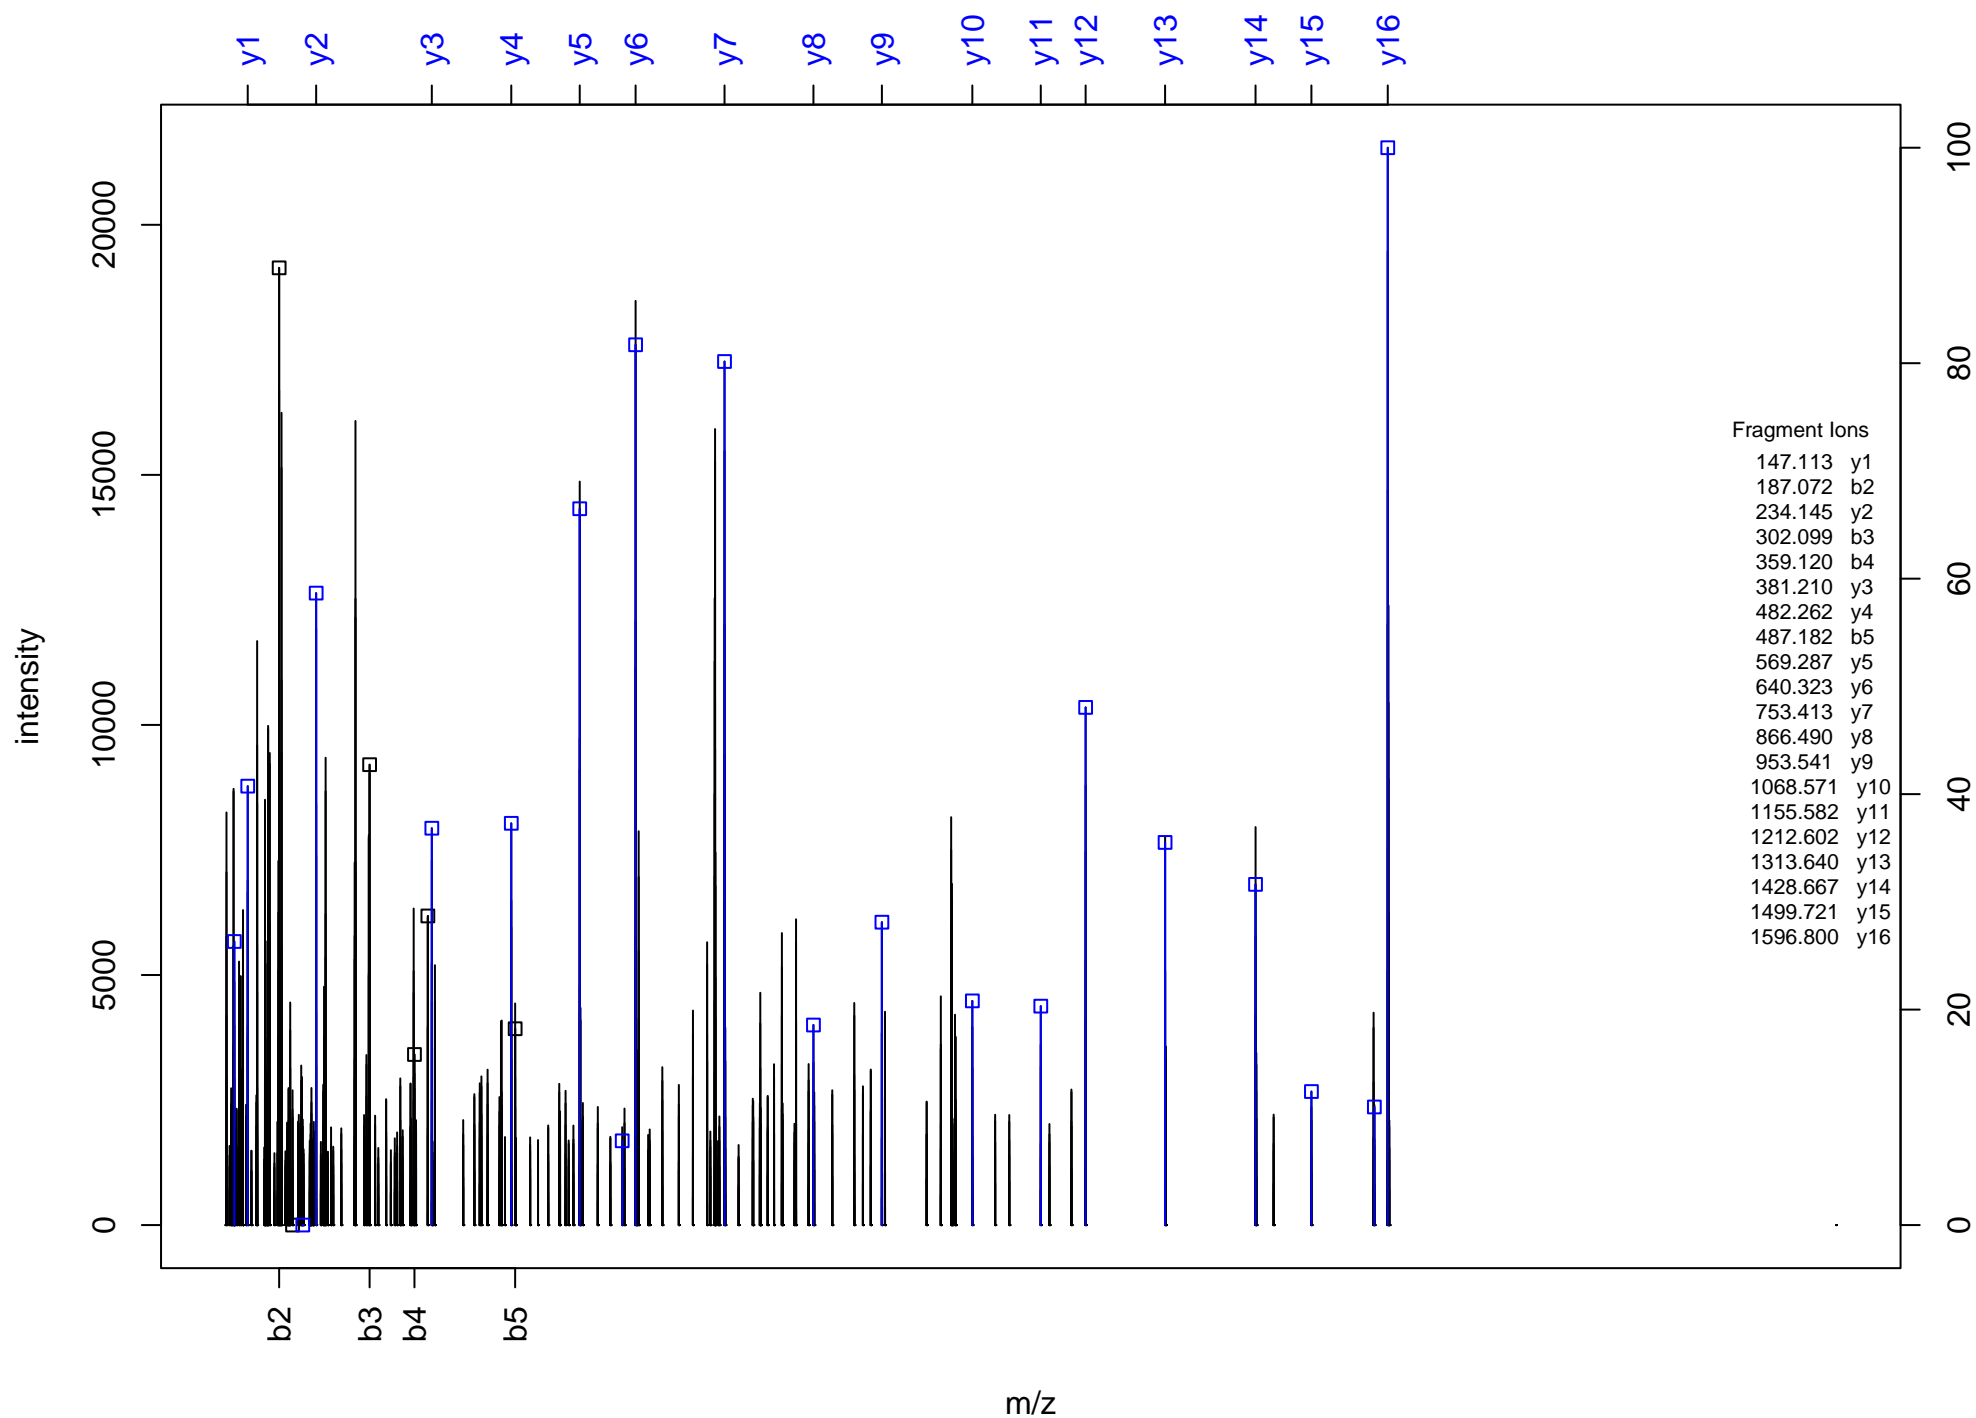

# DLEEWNQR

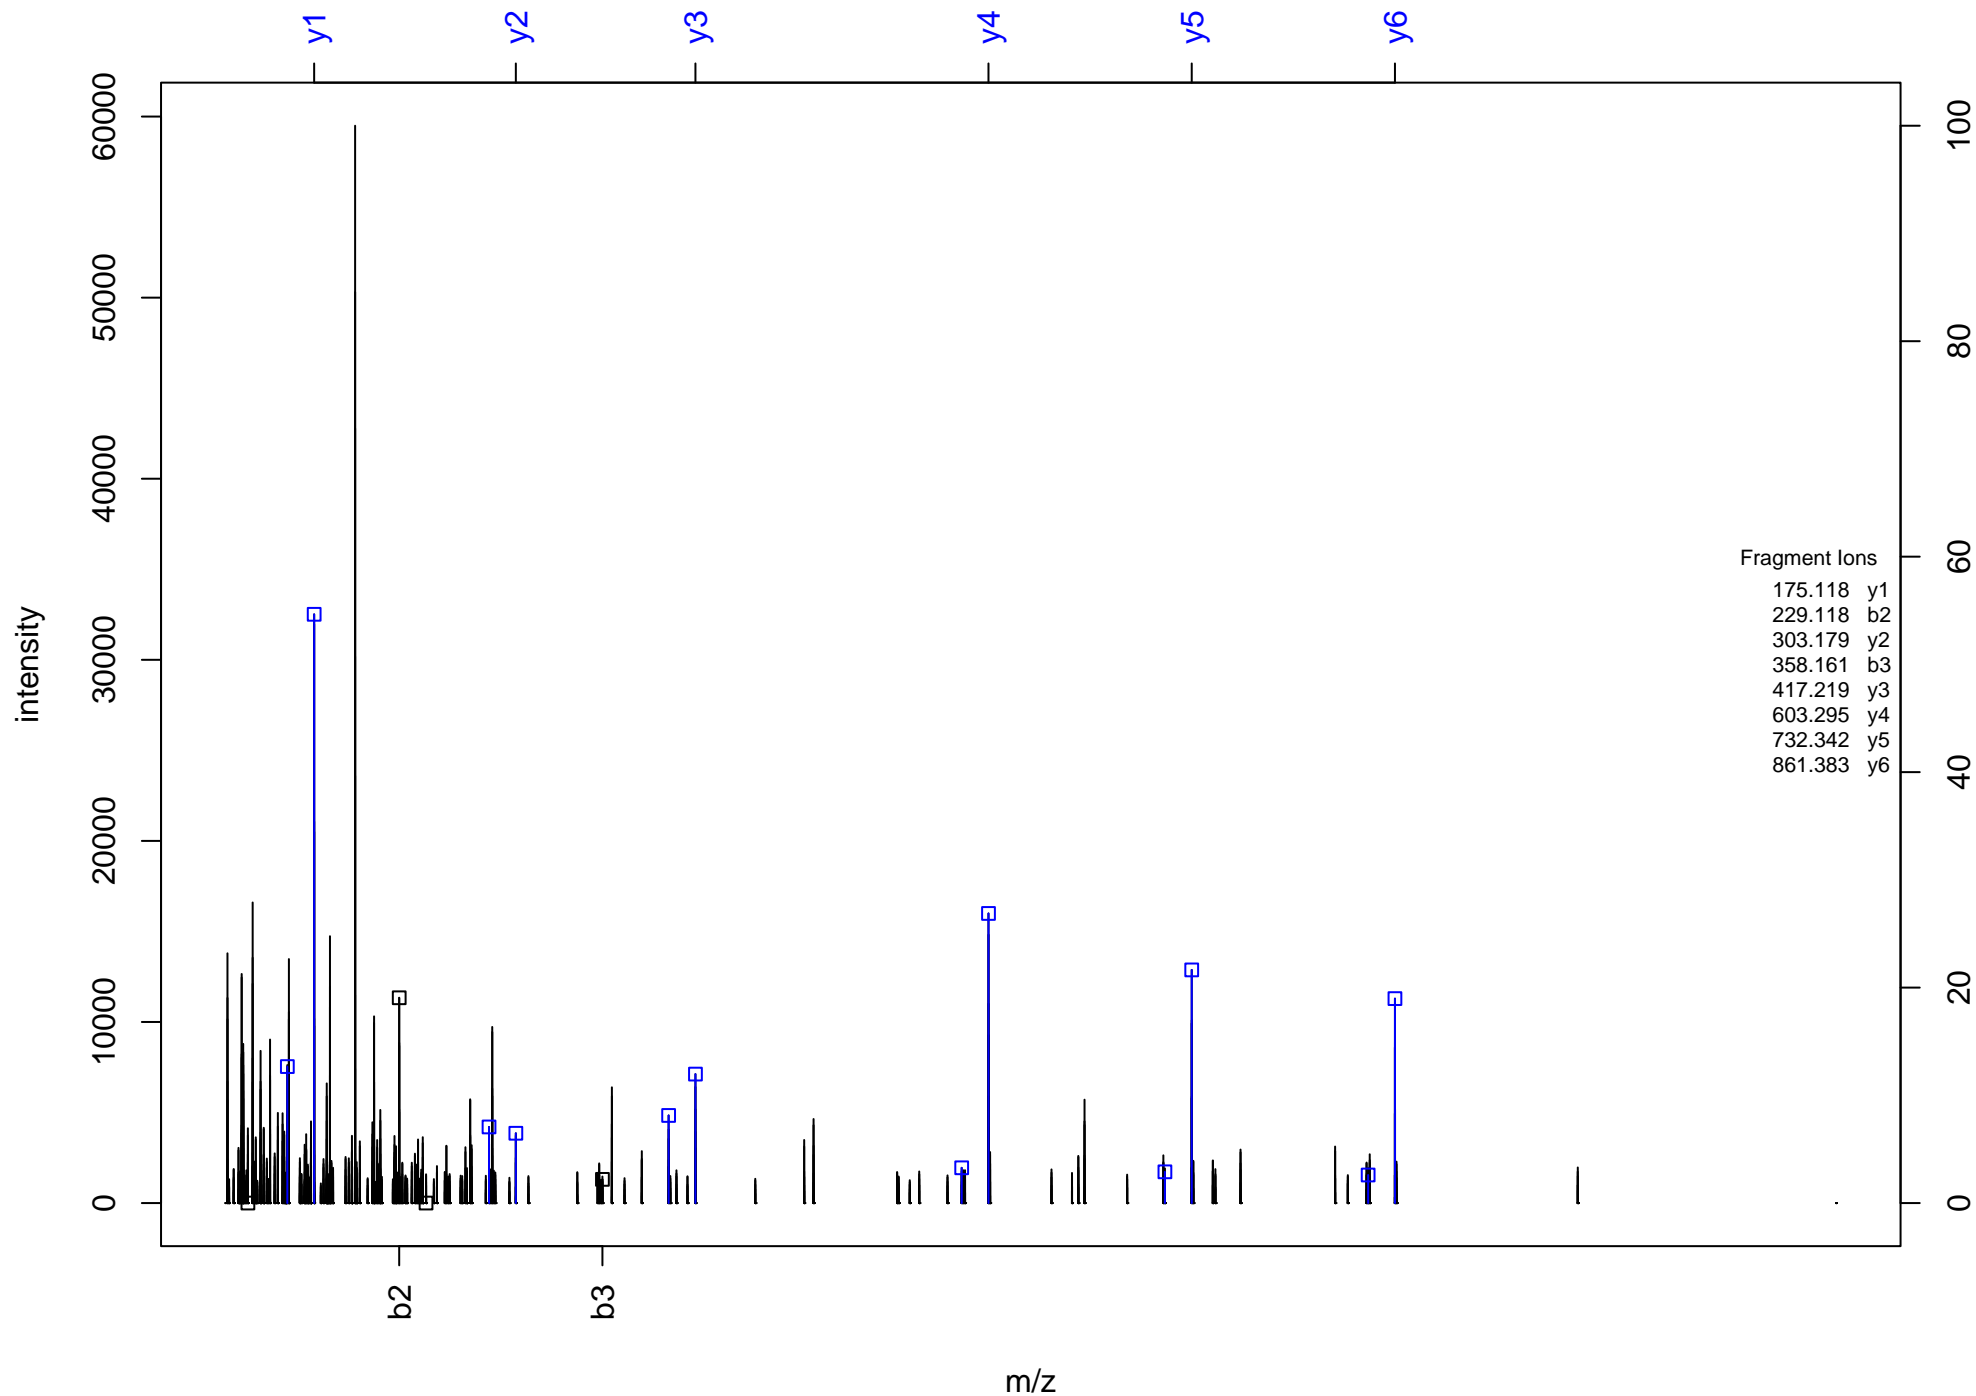



AGVDAFIQNYVDPTDPNTAYASYPASVENYQQPPFTQNVETTEGYQPPPYY

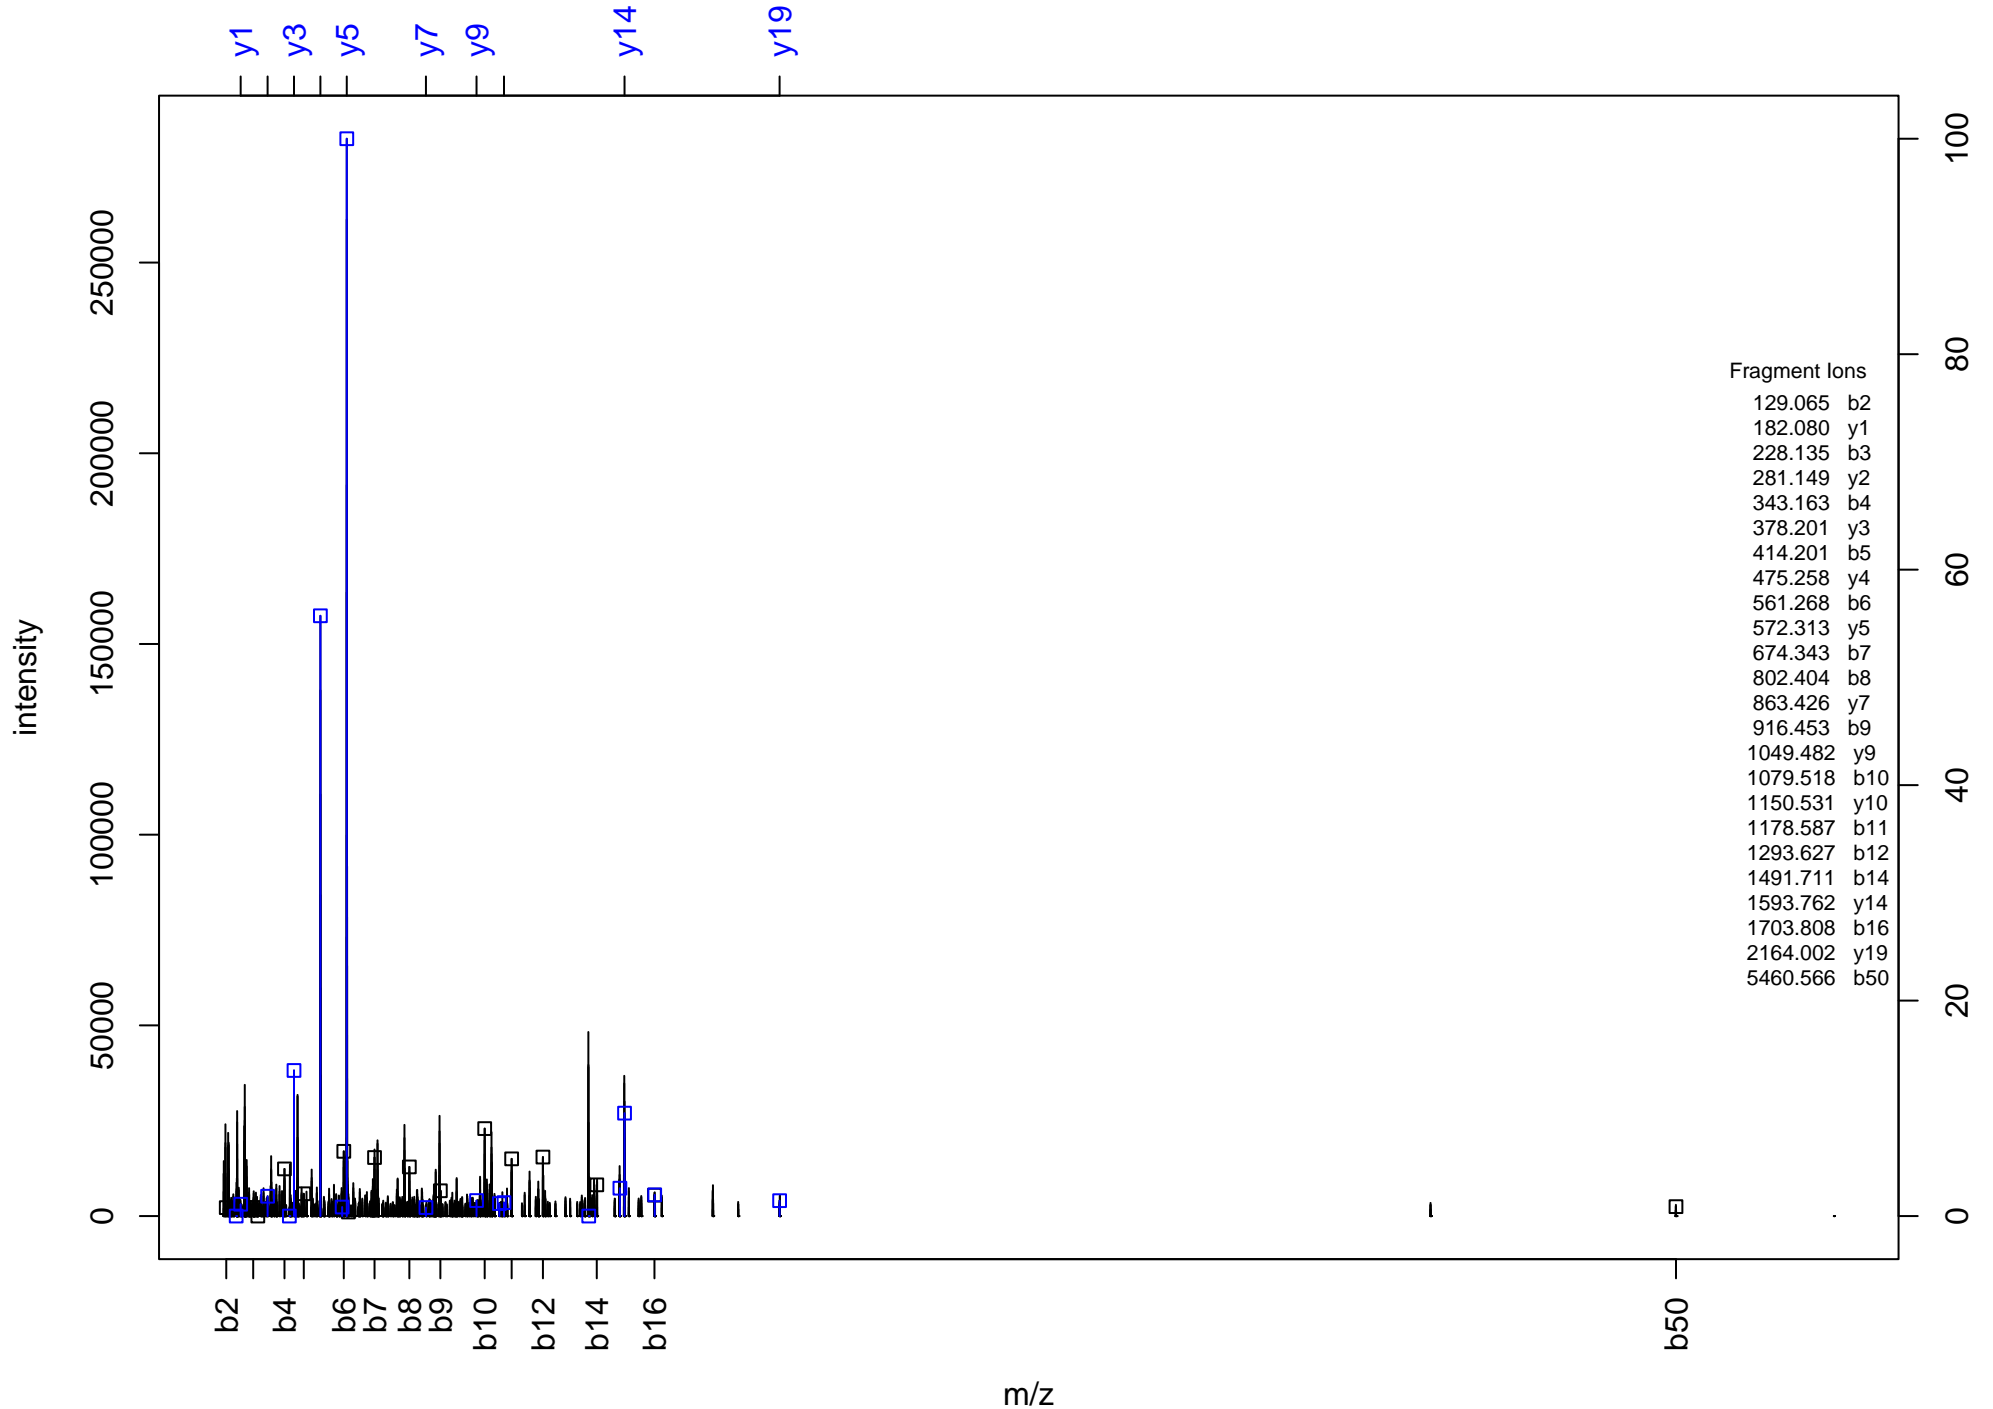

# SLAPVELLLR

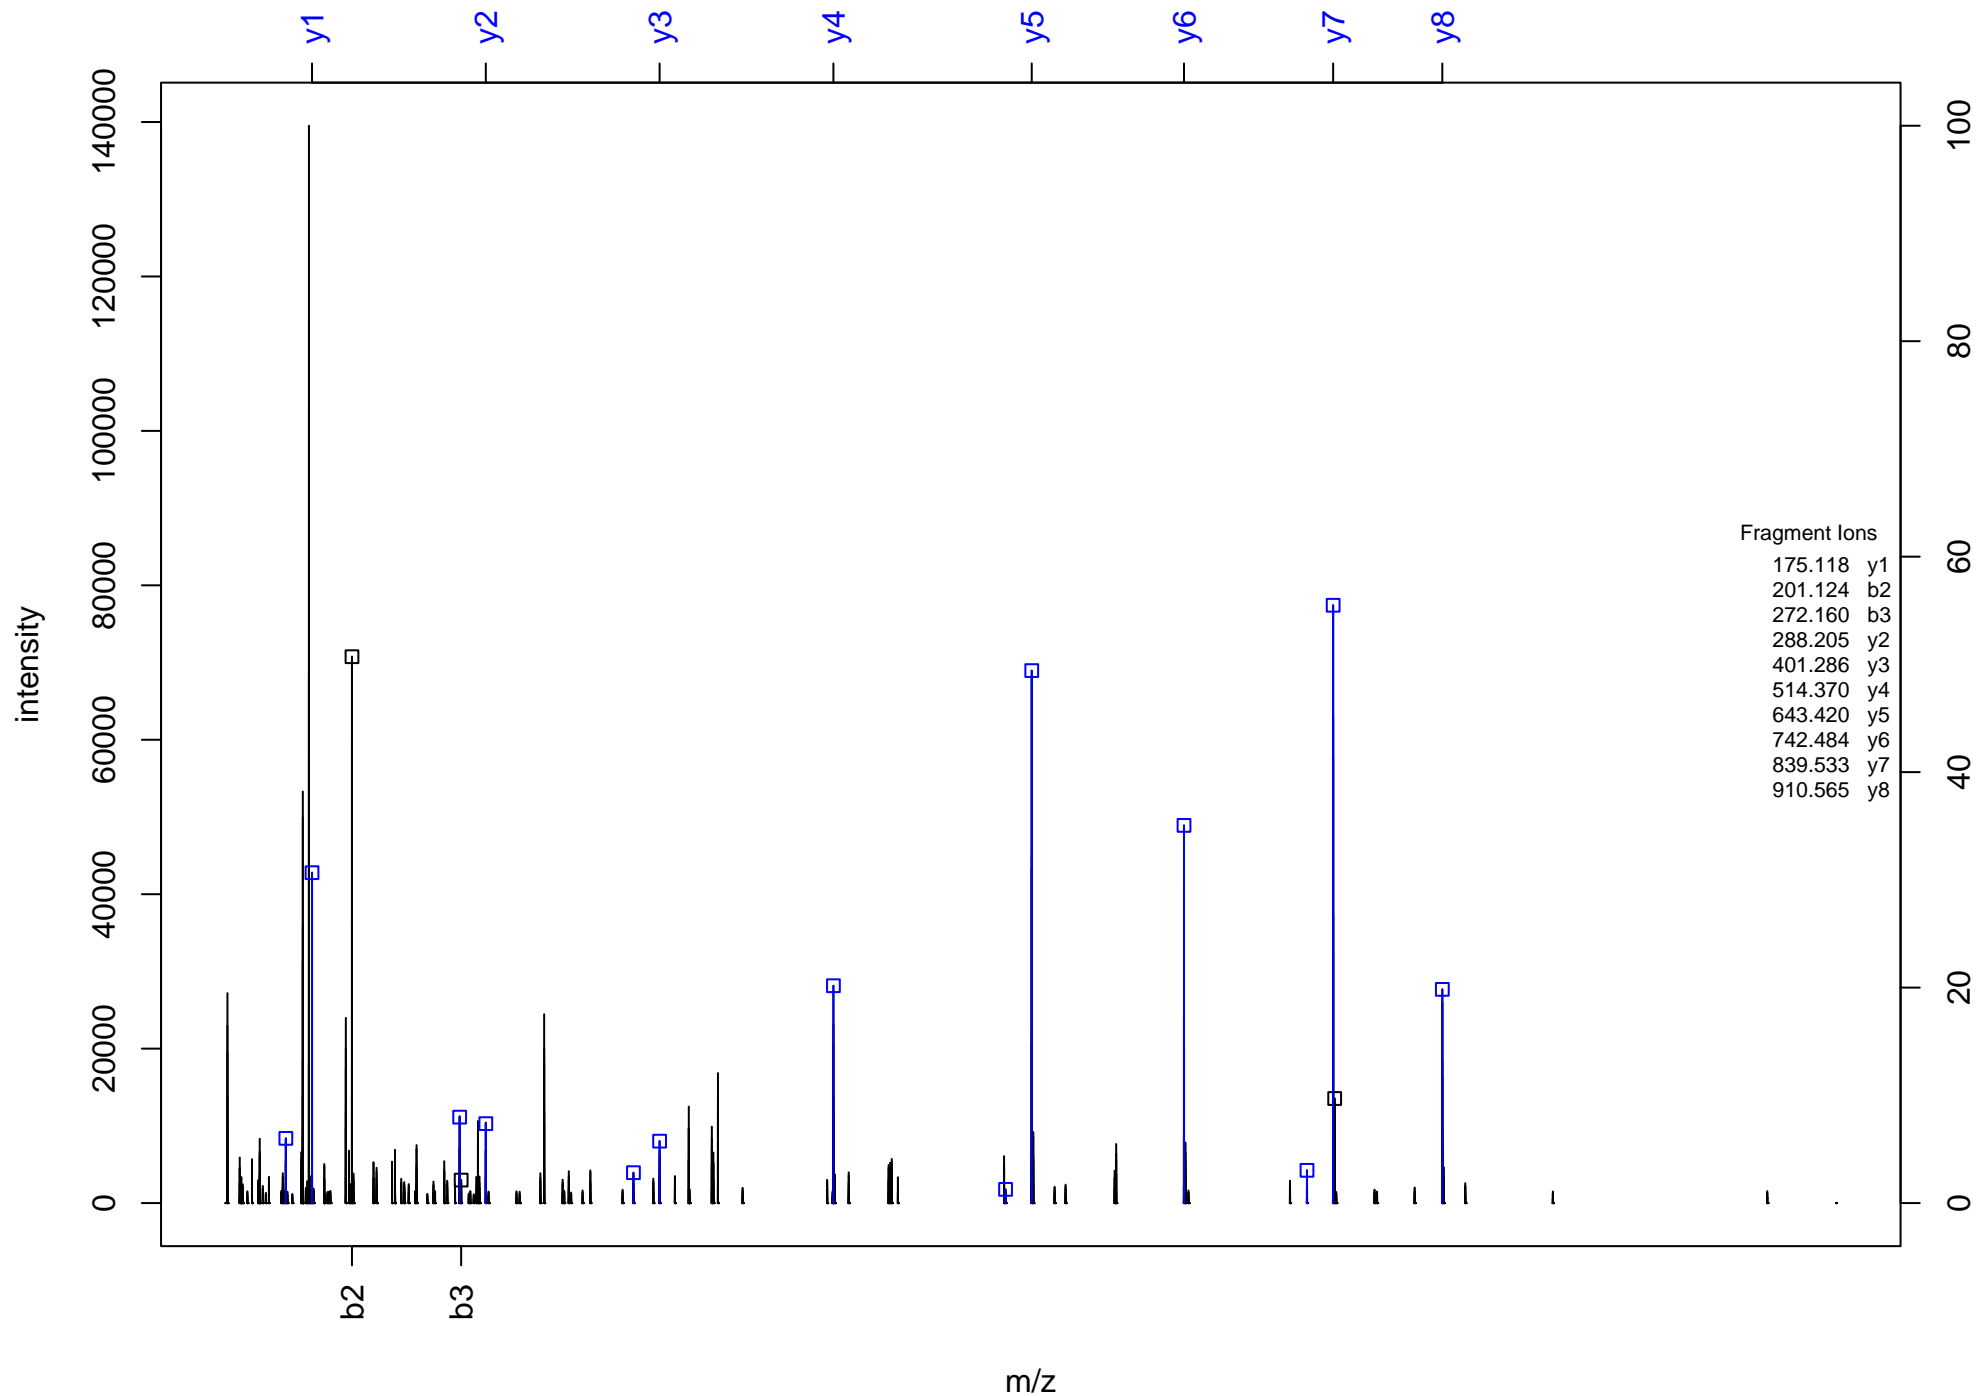

# TLVTLGSQTPVQTQPTPK

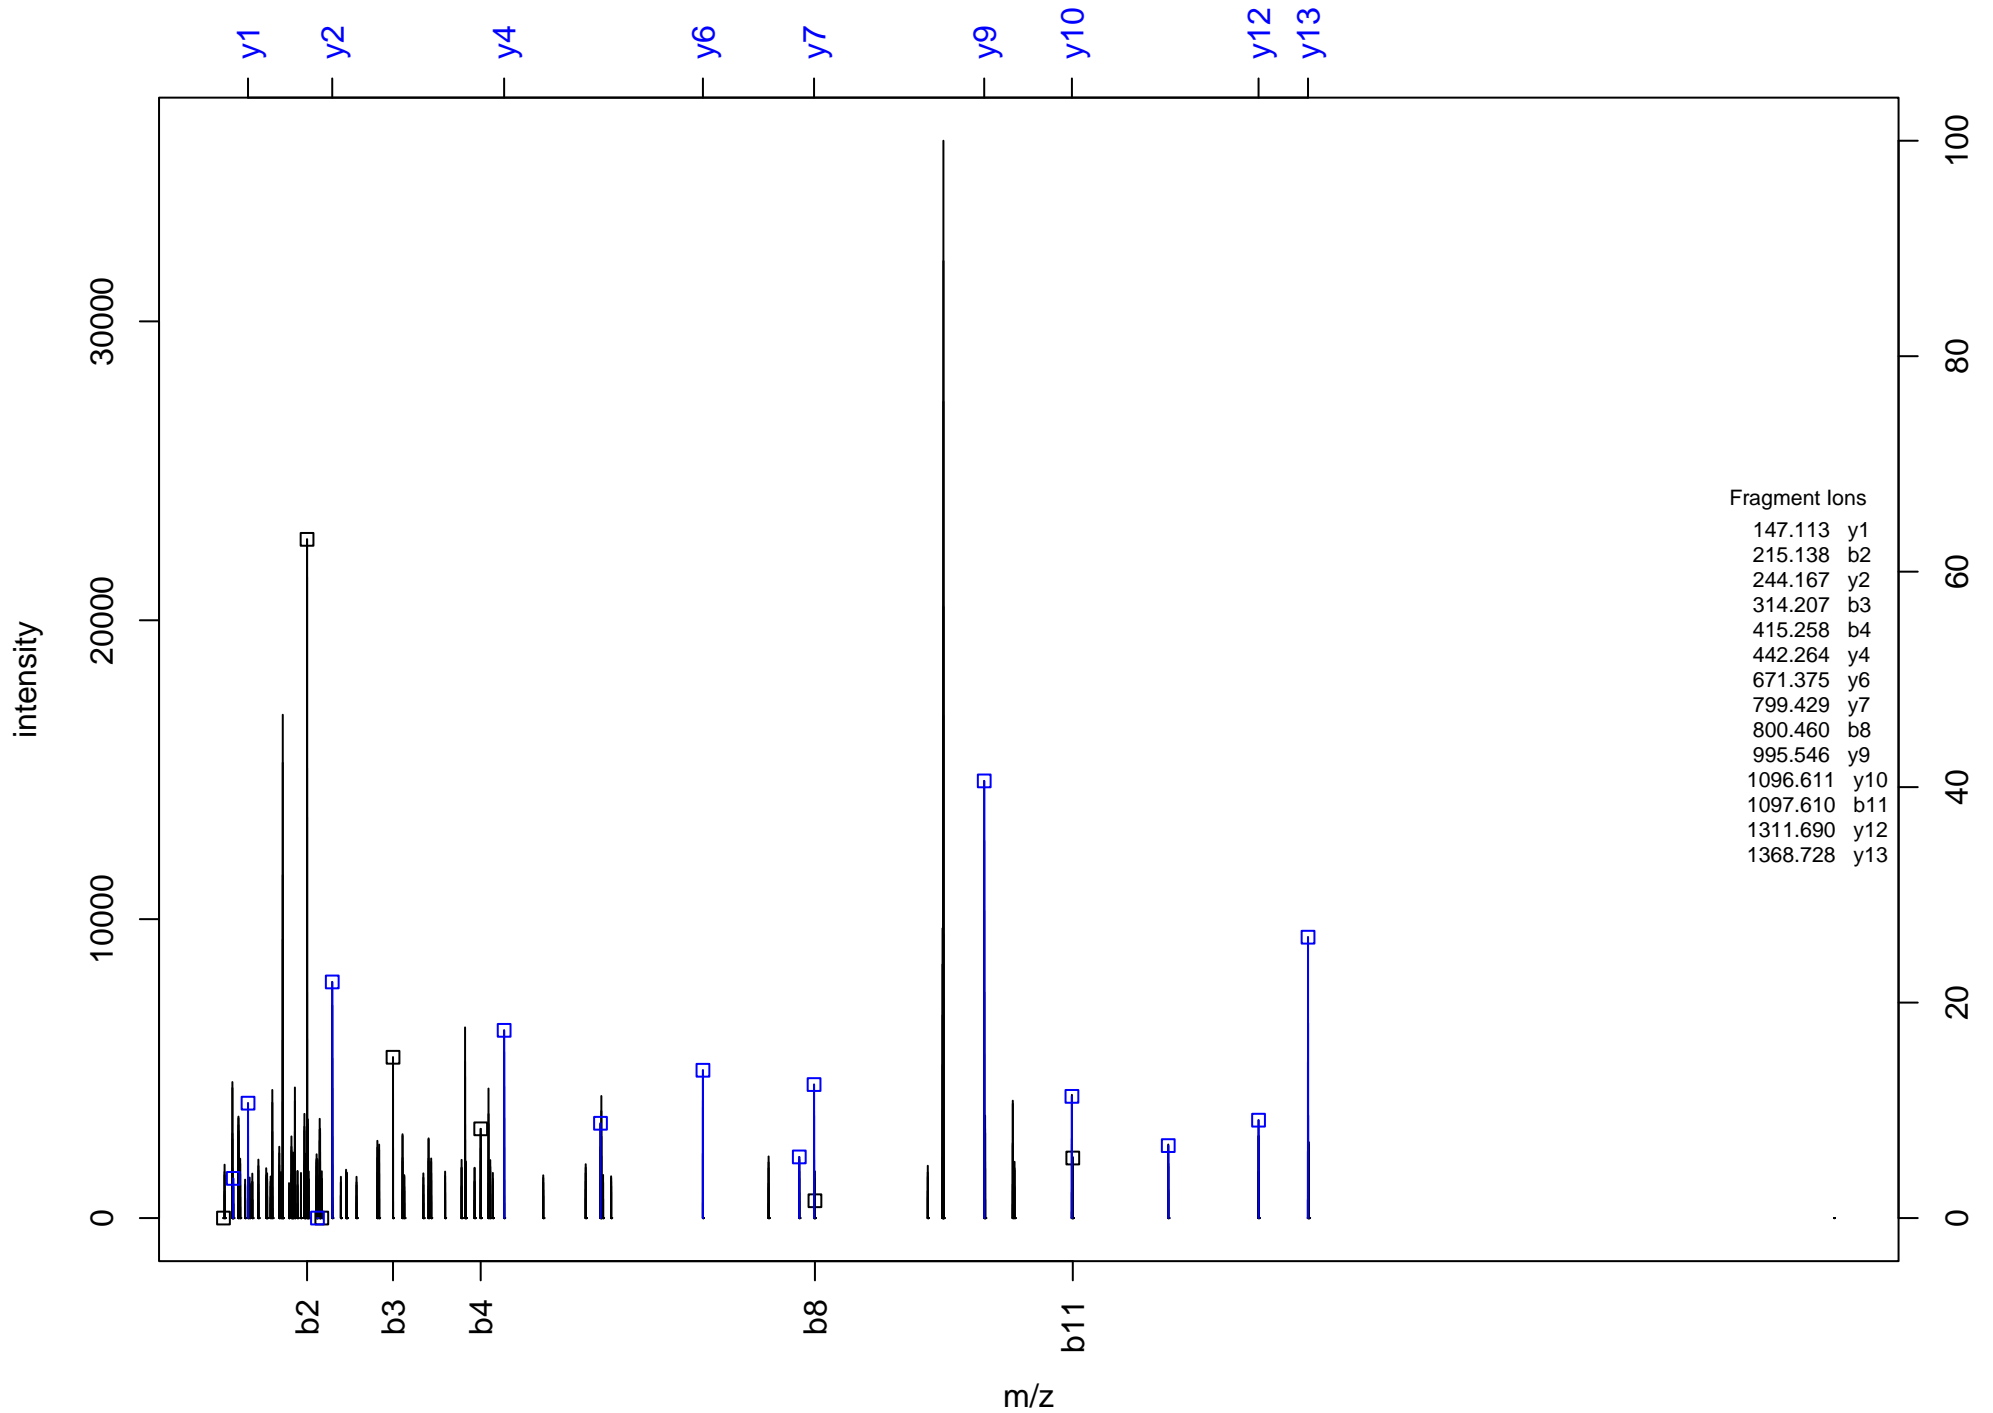

# AADMGNPVGQSGLGMAYLYGR

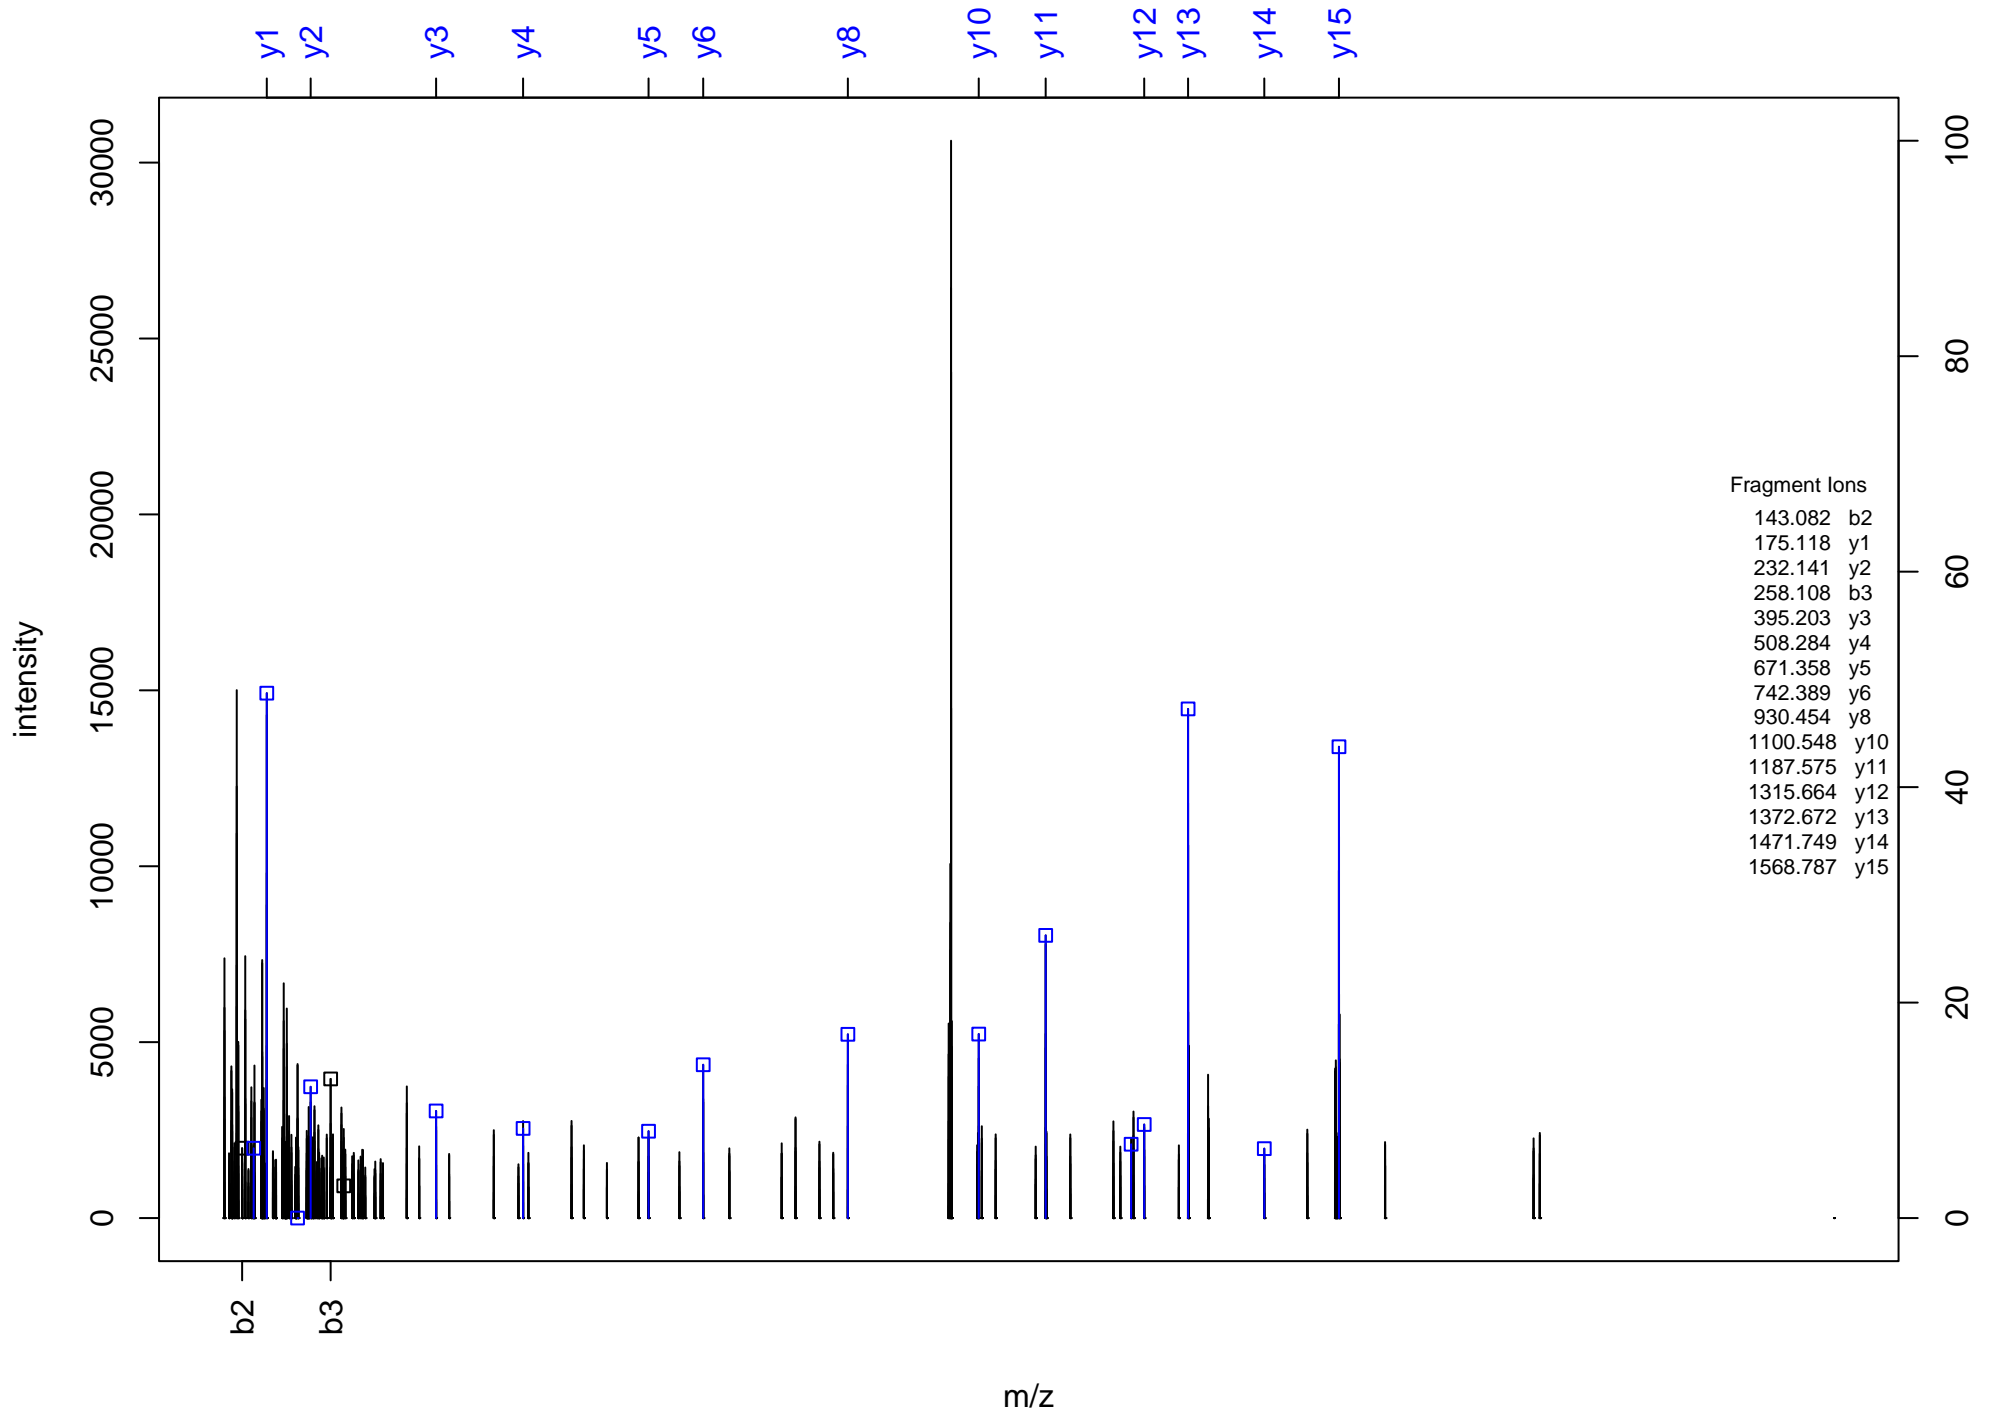

# (Ac)AGAACCFSDQFR

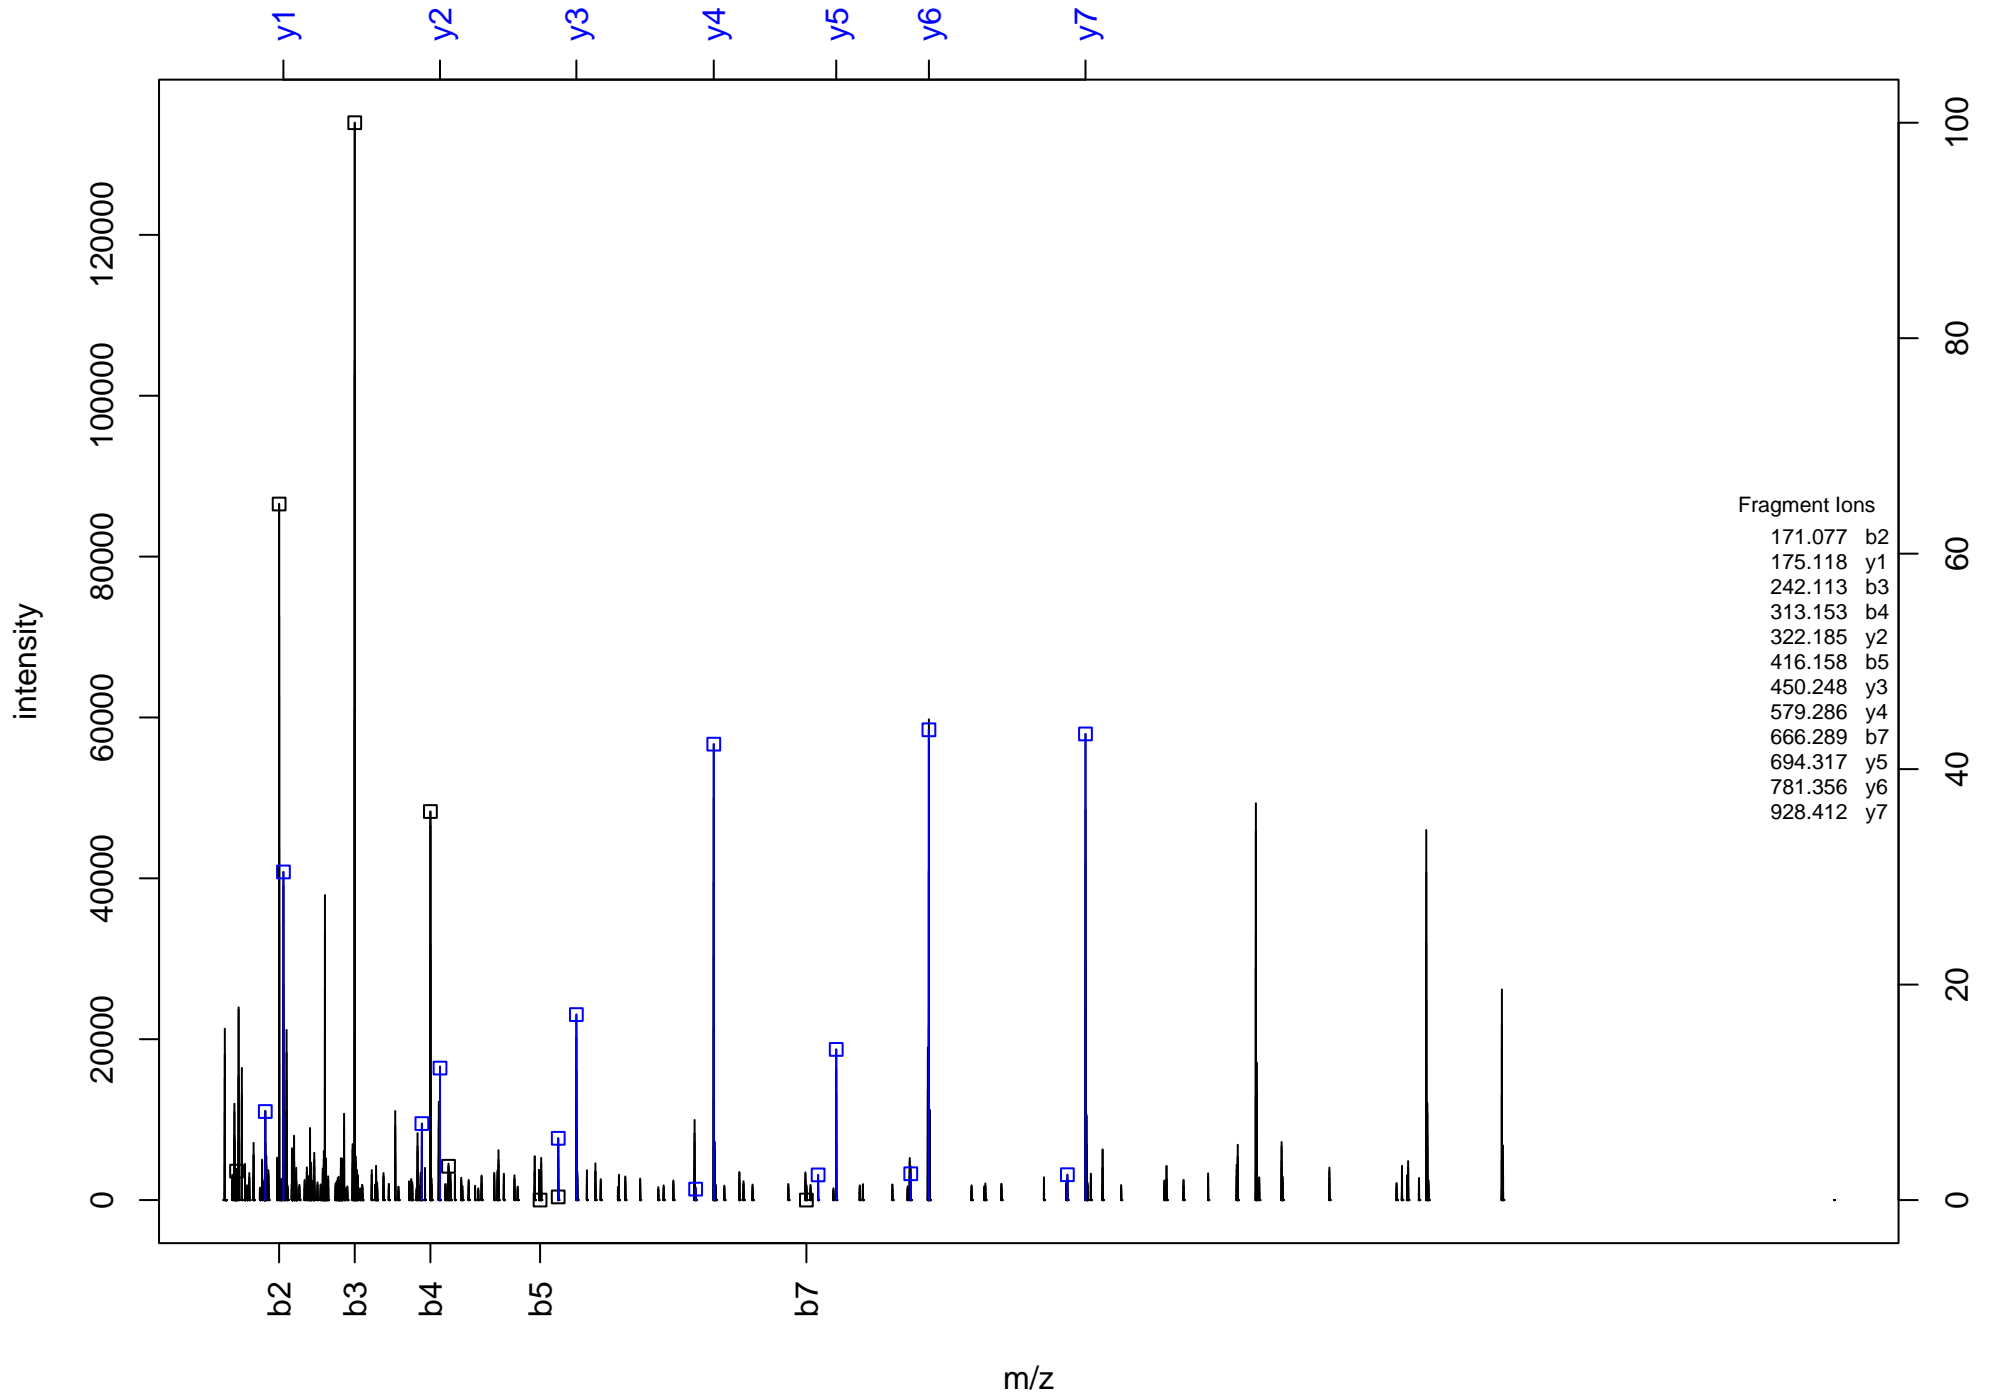

# TALEMVQAAGTDR

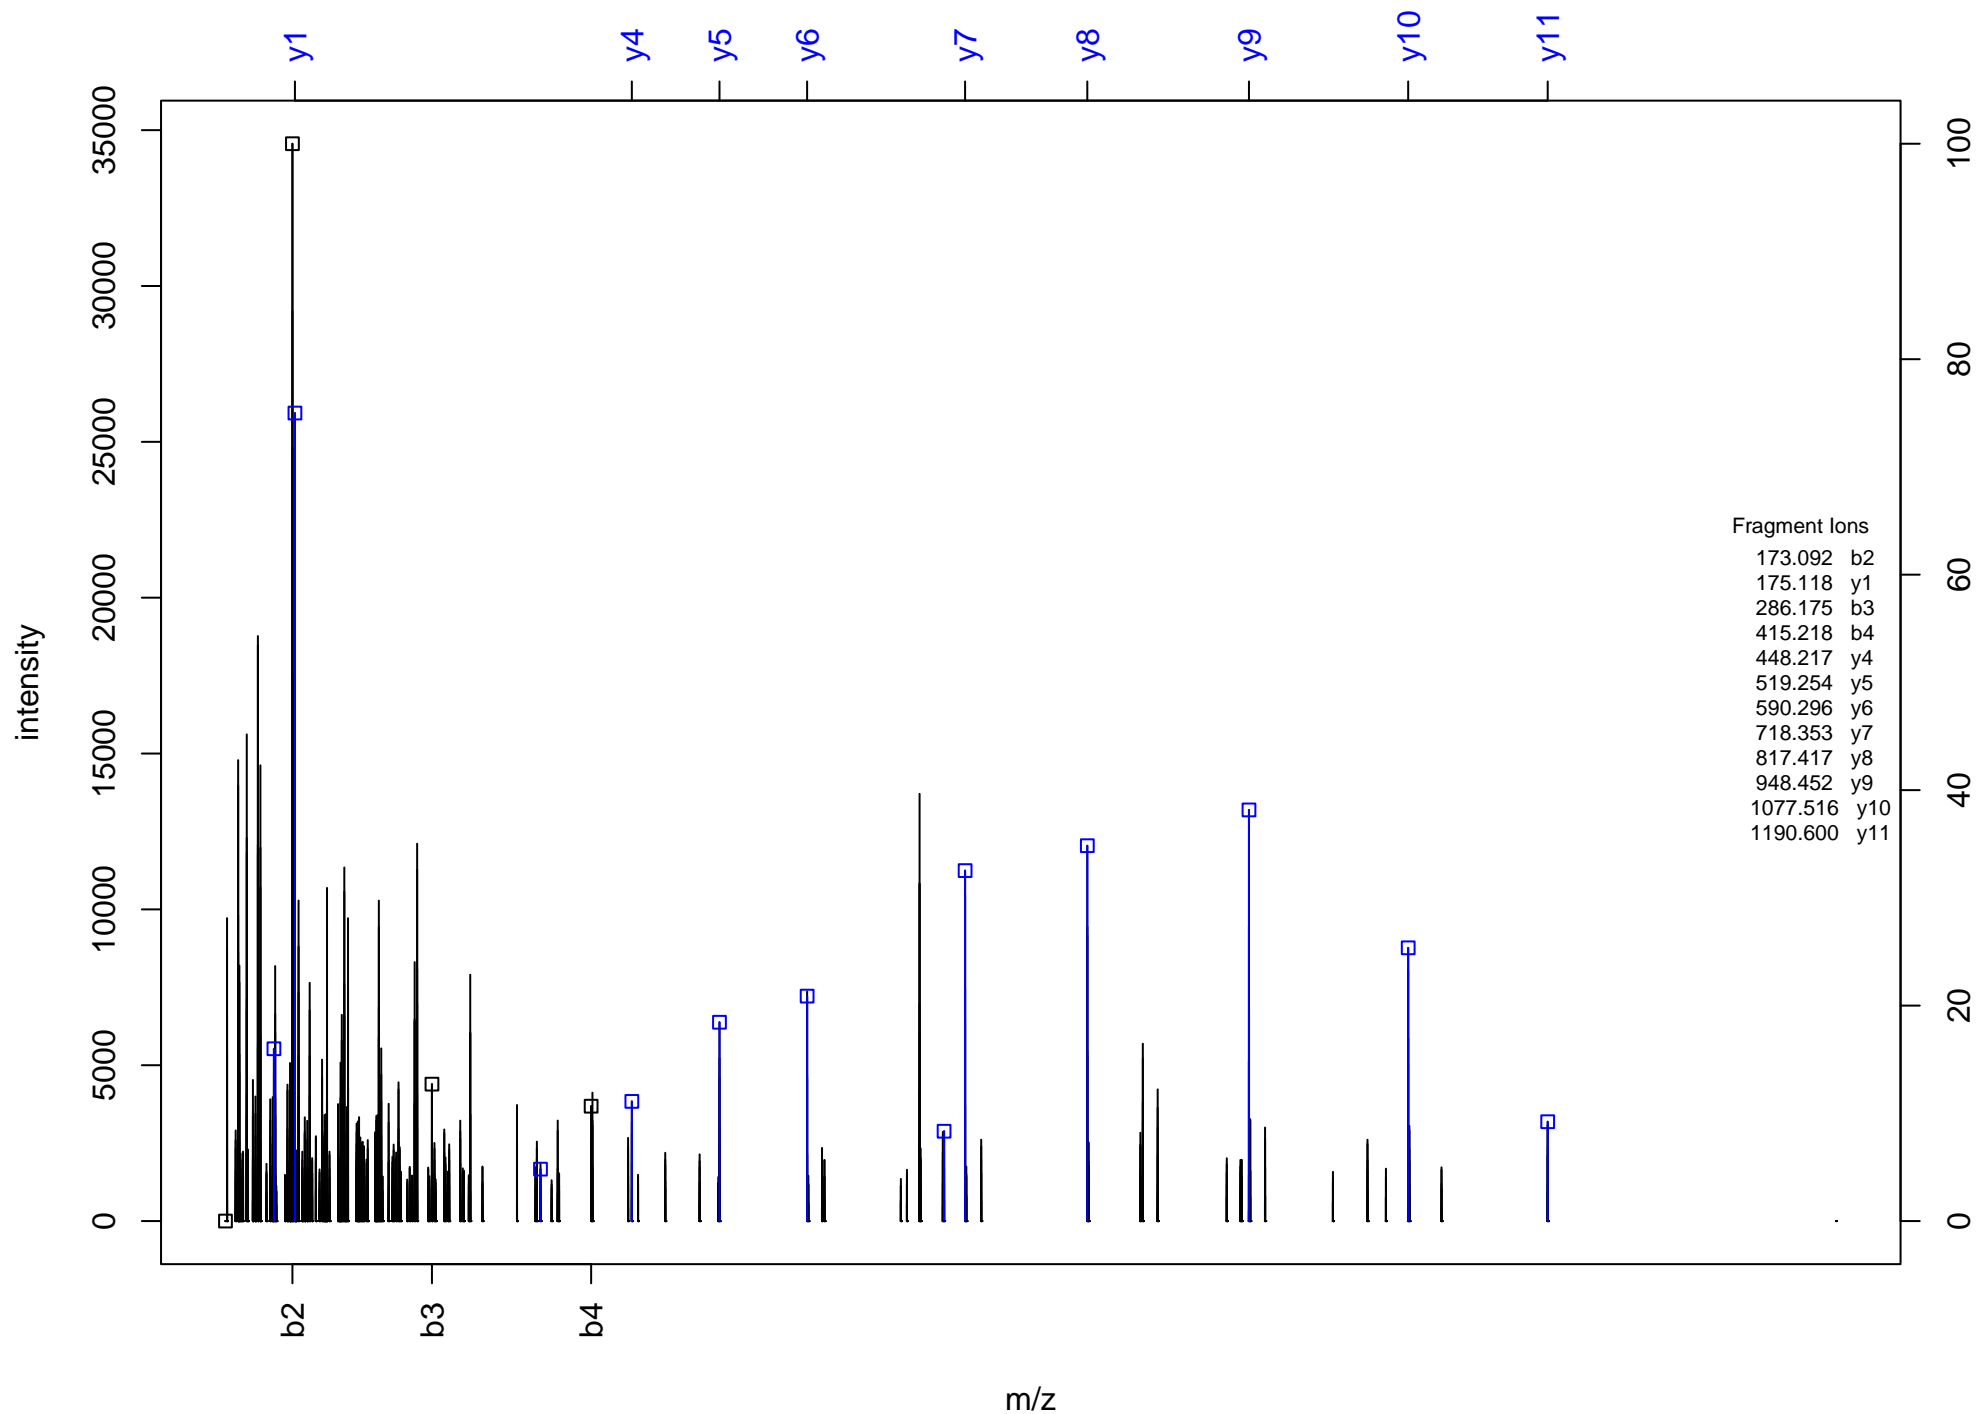

# DQVFGCQLESLCQR

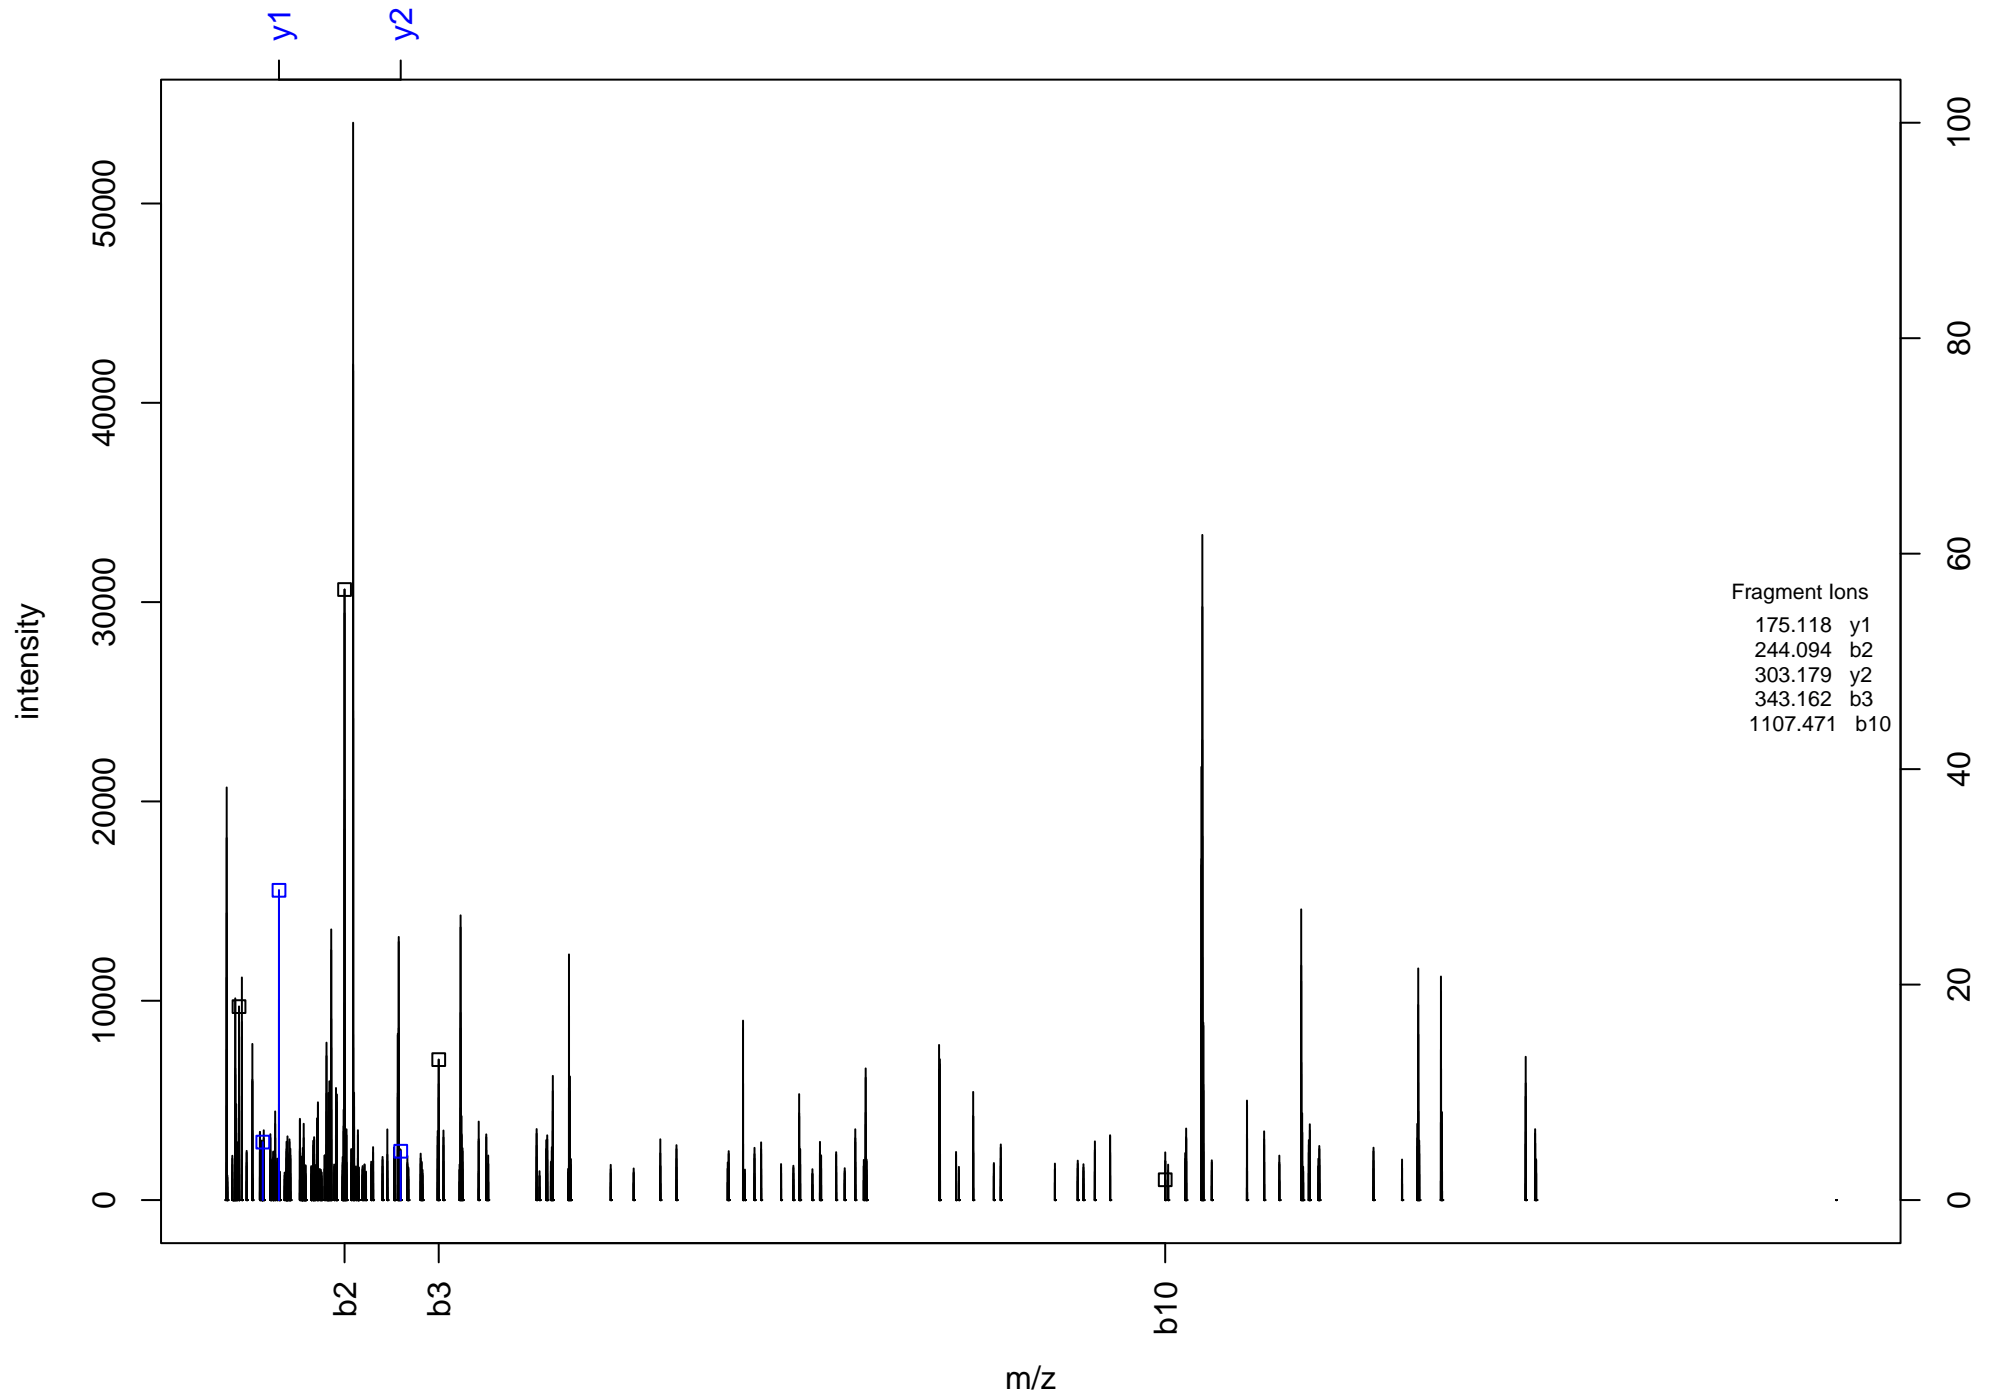

# ASEWQLDQPSWGR

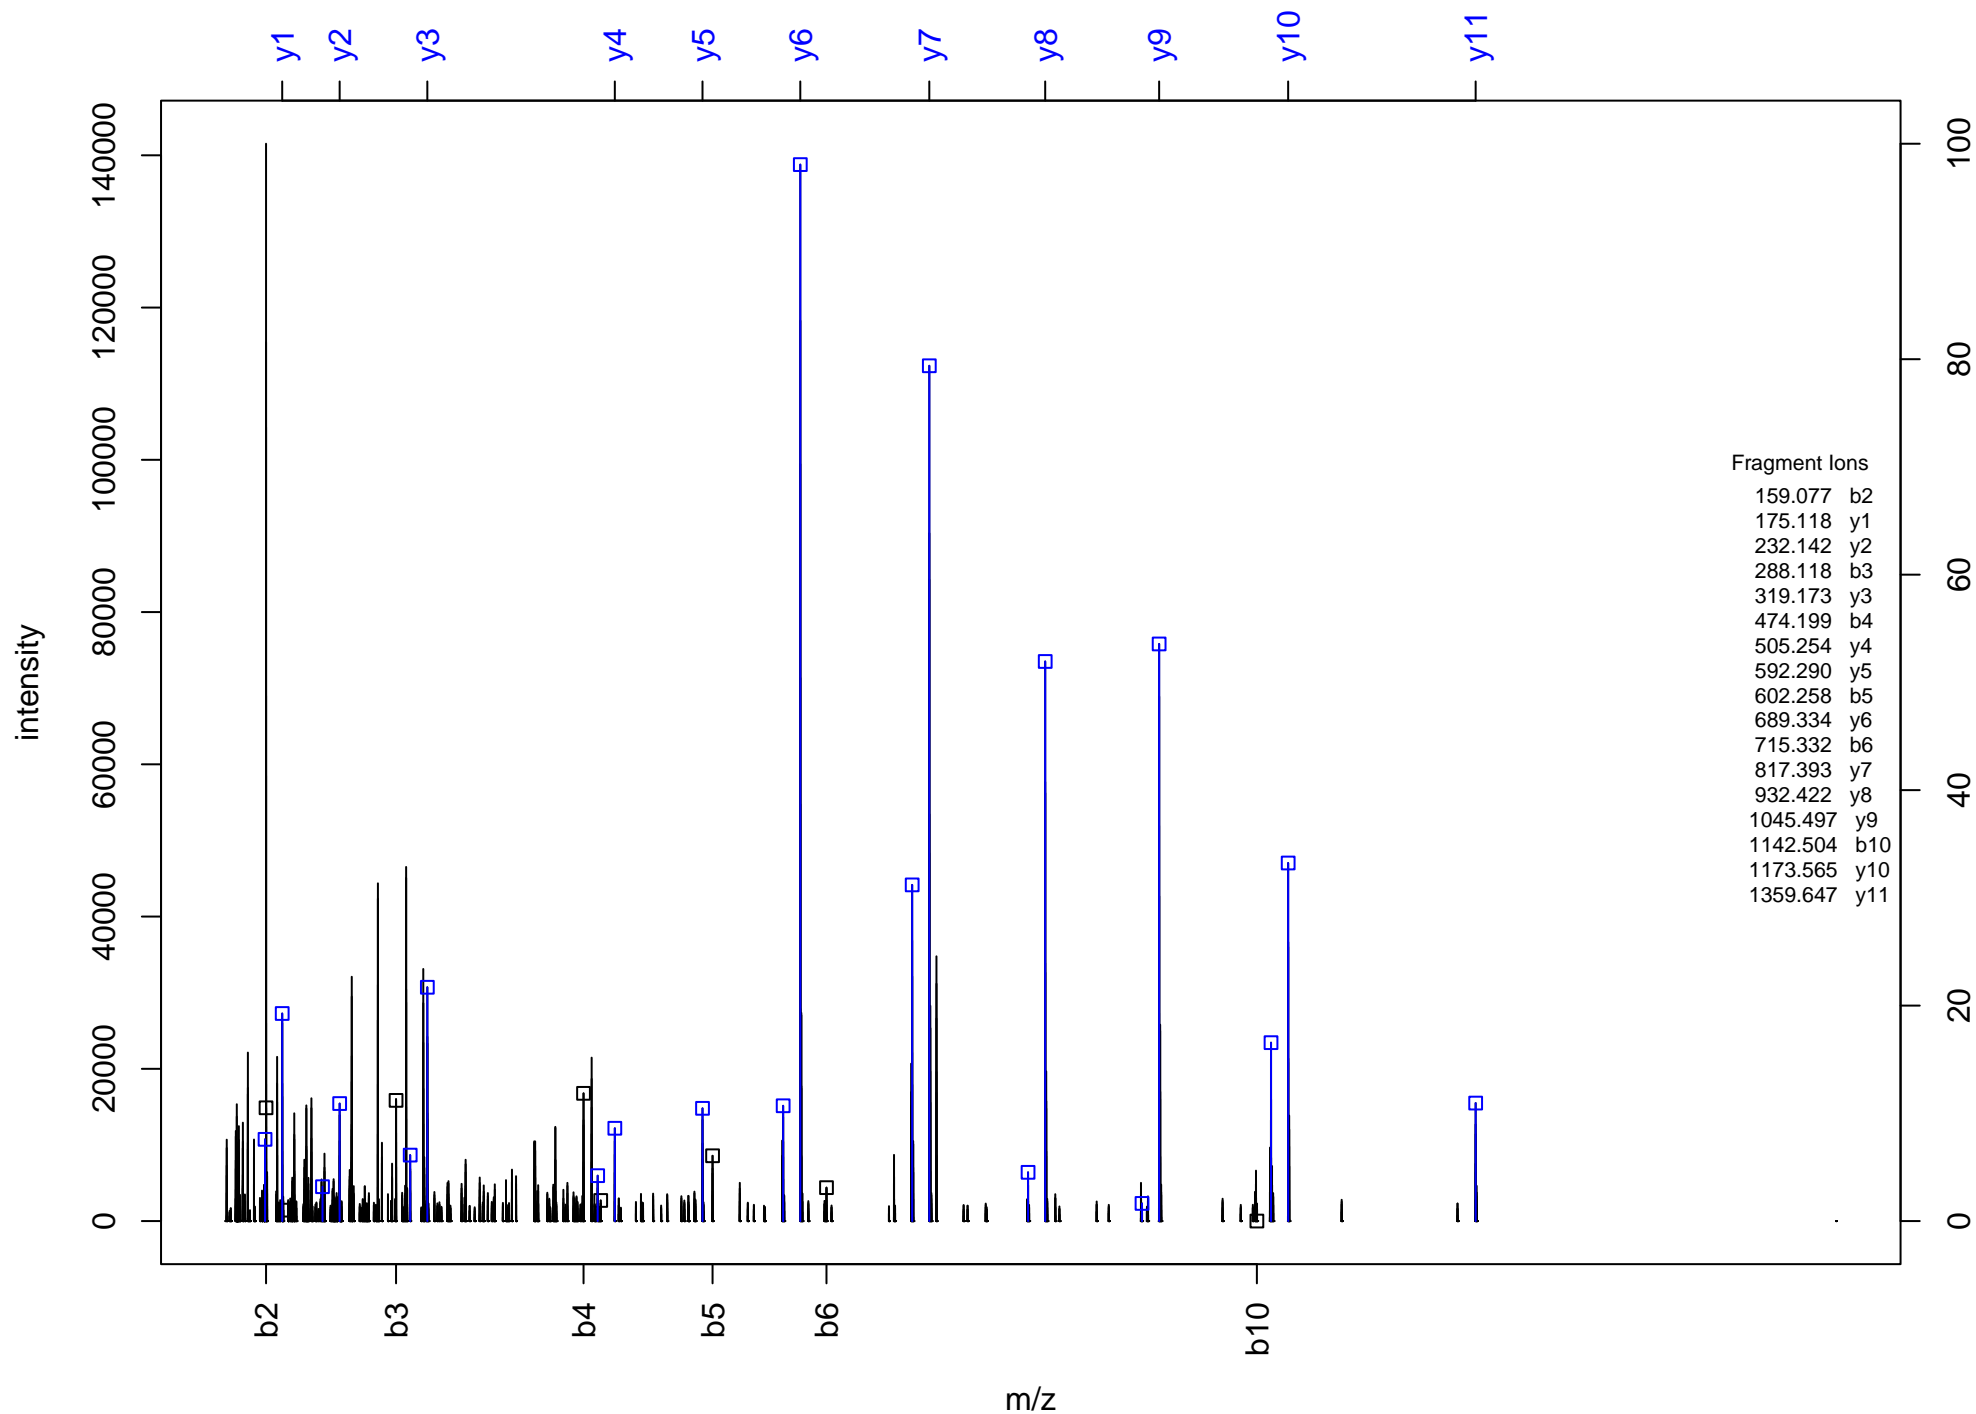



# (Ac)M\*PKPTHYYIK

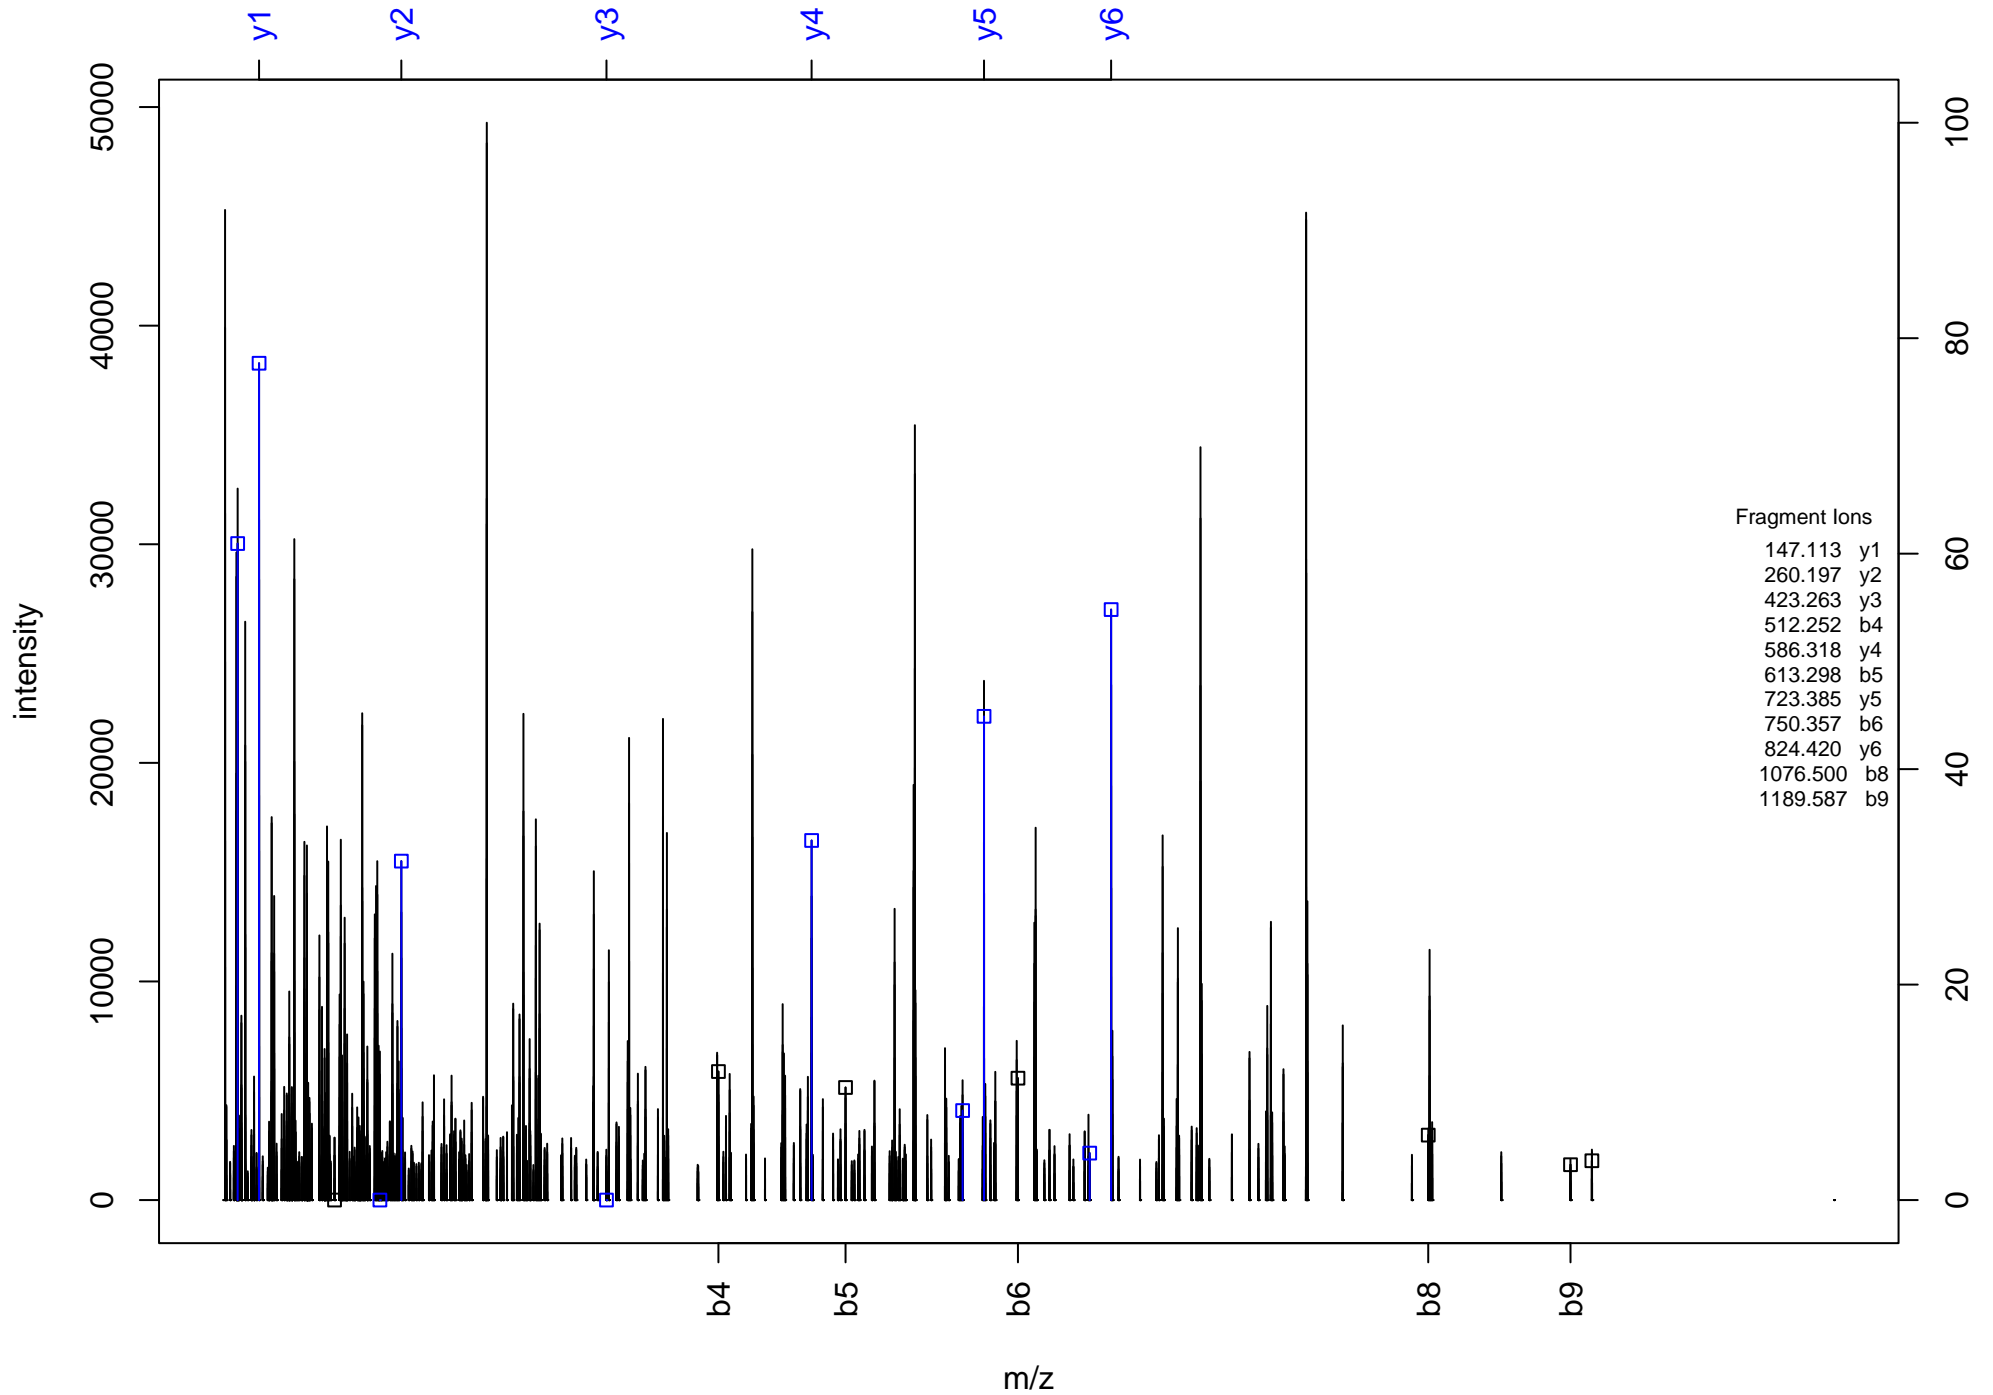

# LPSSVFASEFEEDVGLLNK

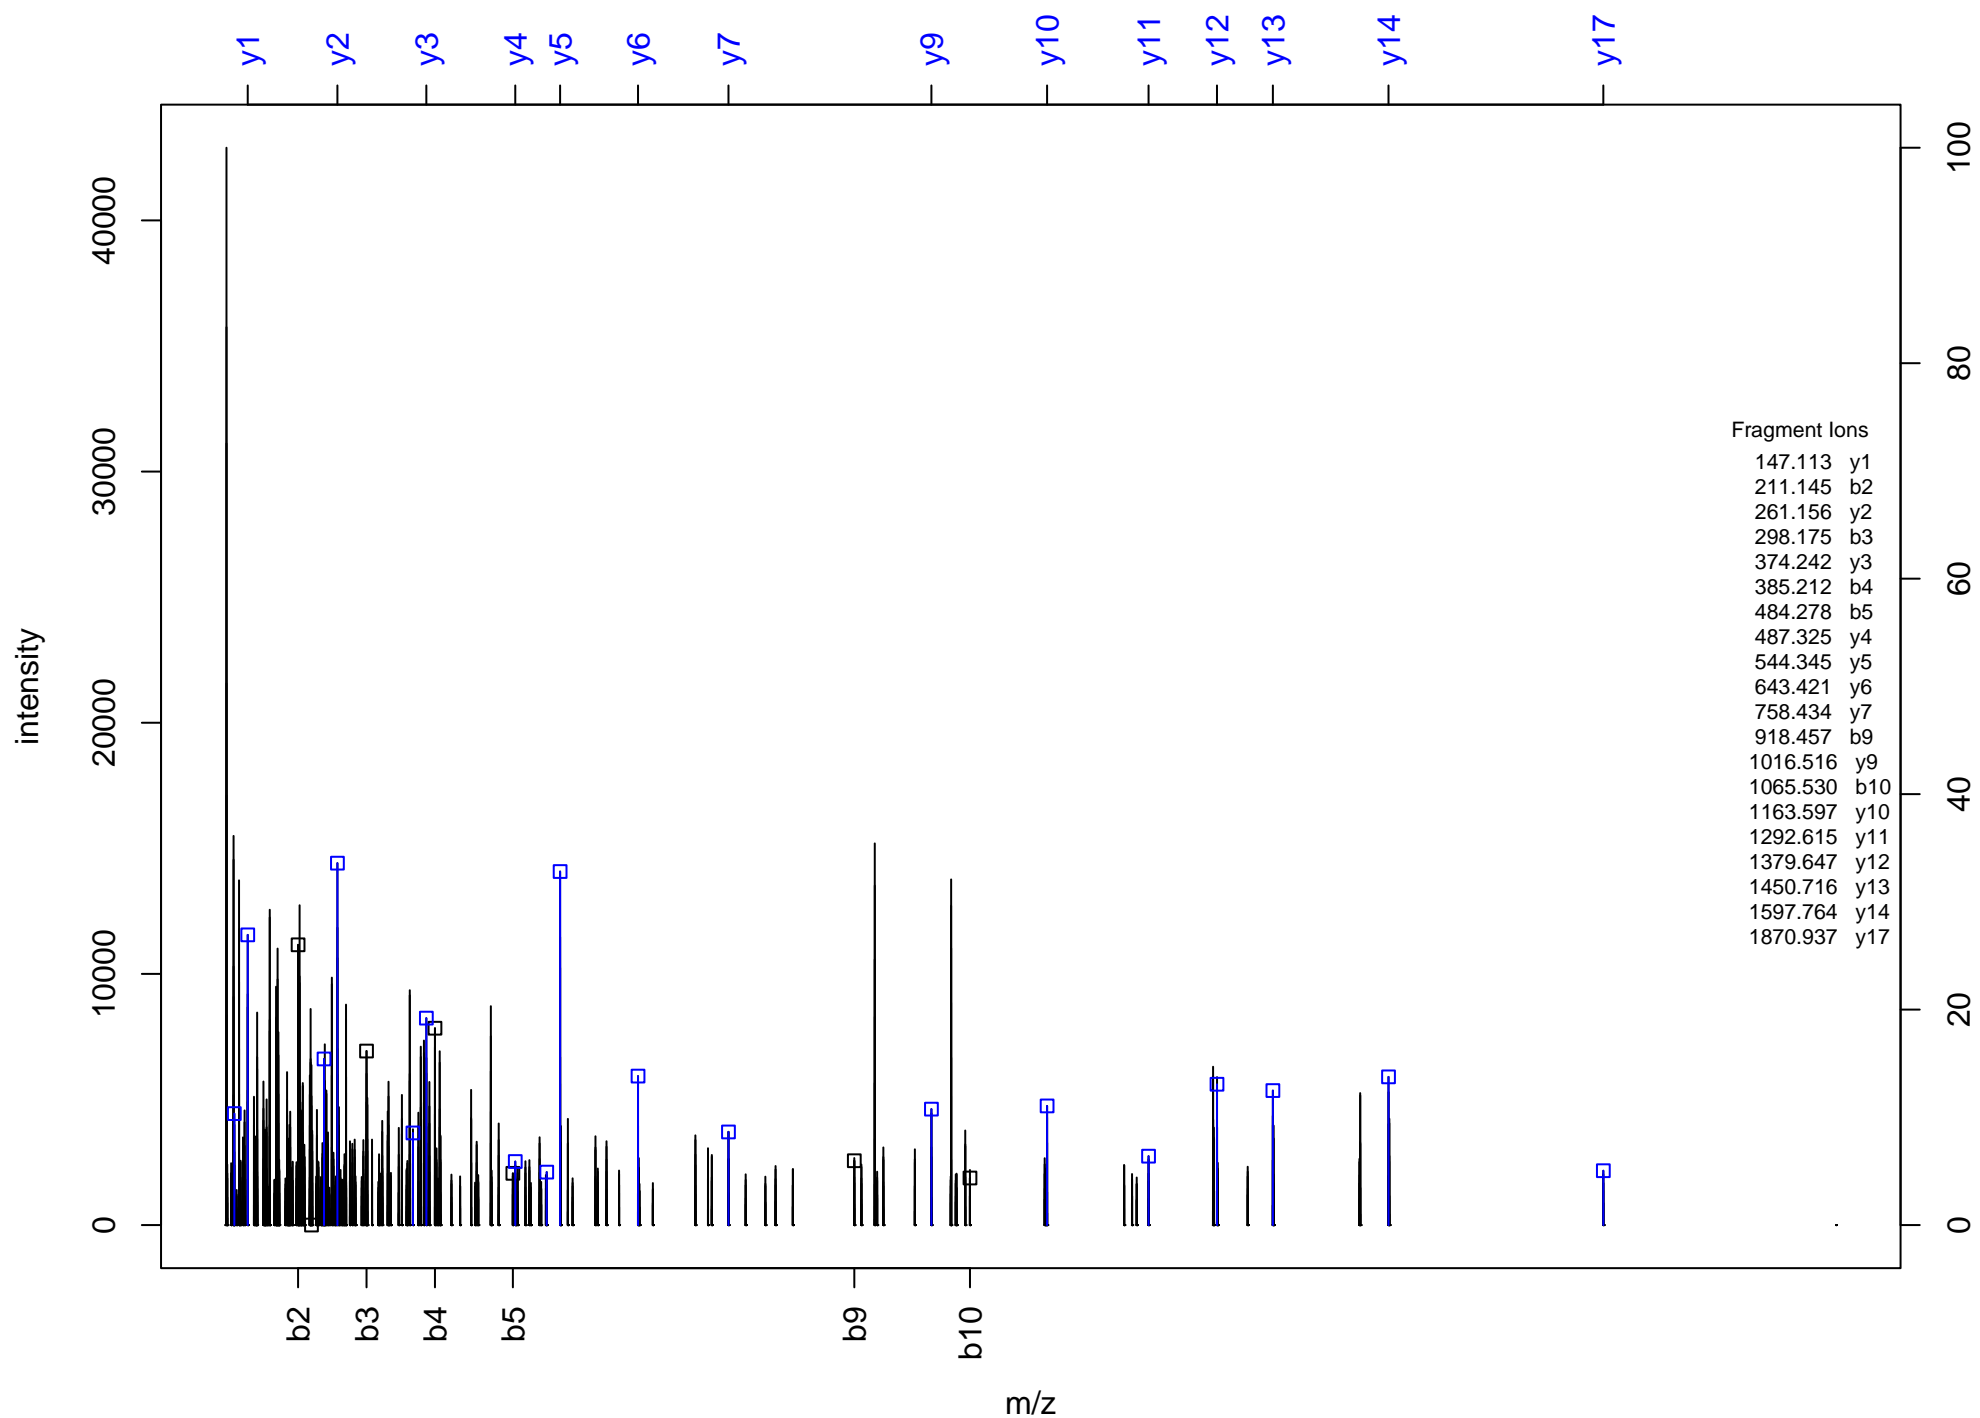

# GPAGNDDEESSDSTPLLPGAR

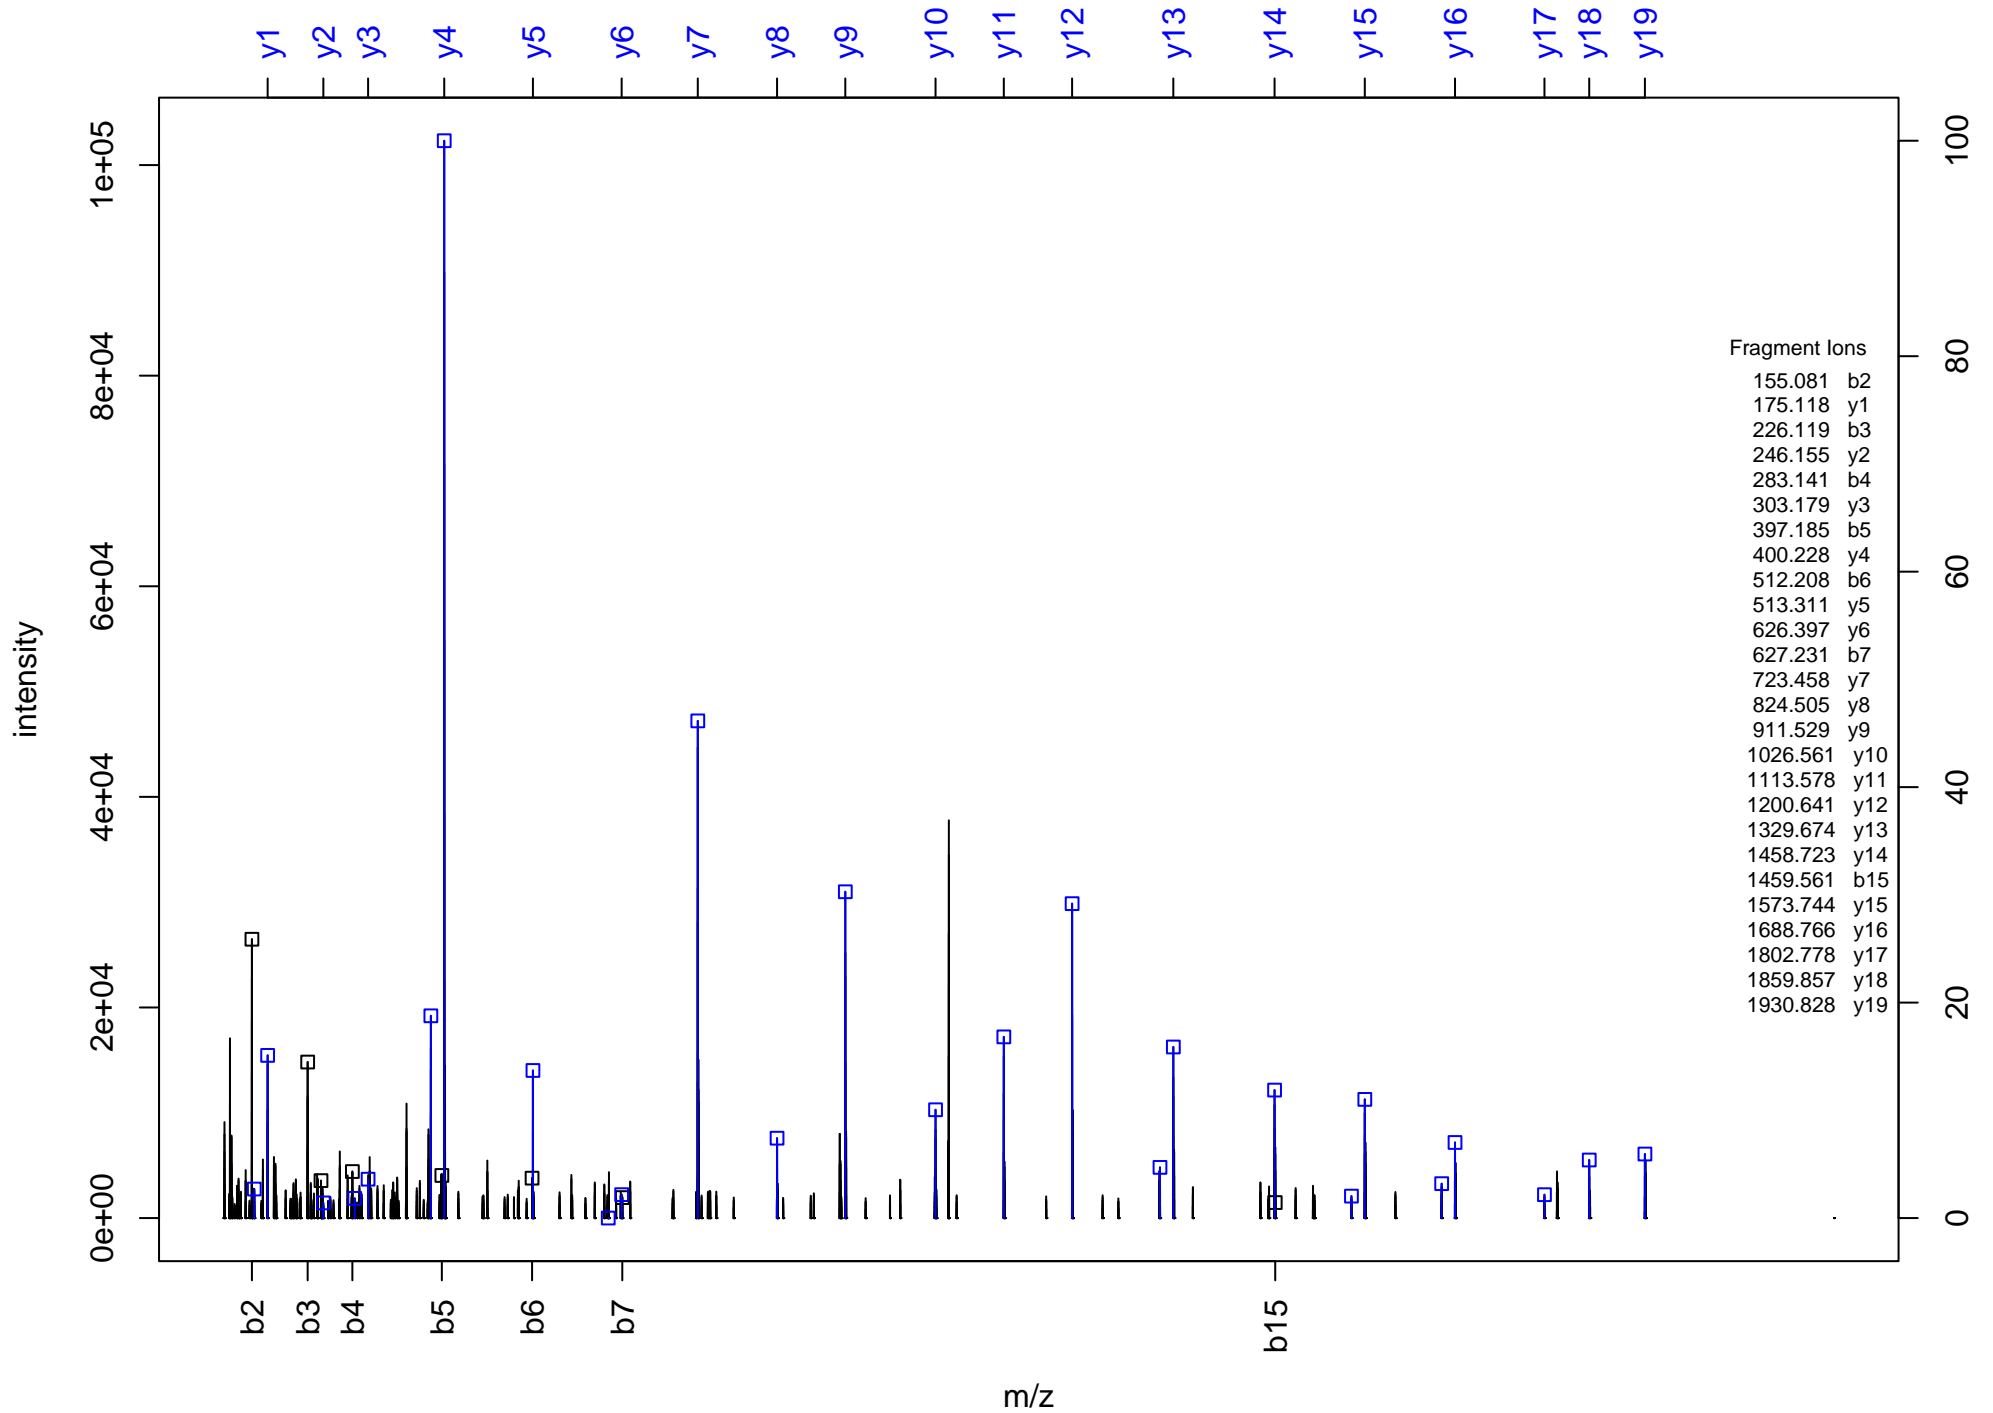

# (Ac)M\*DDSEKDFN^LK

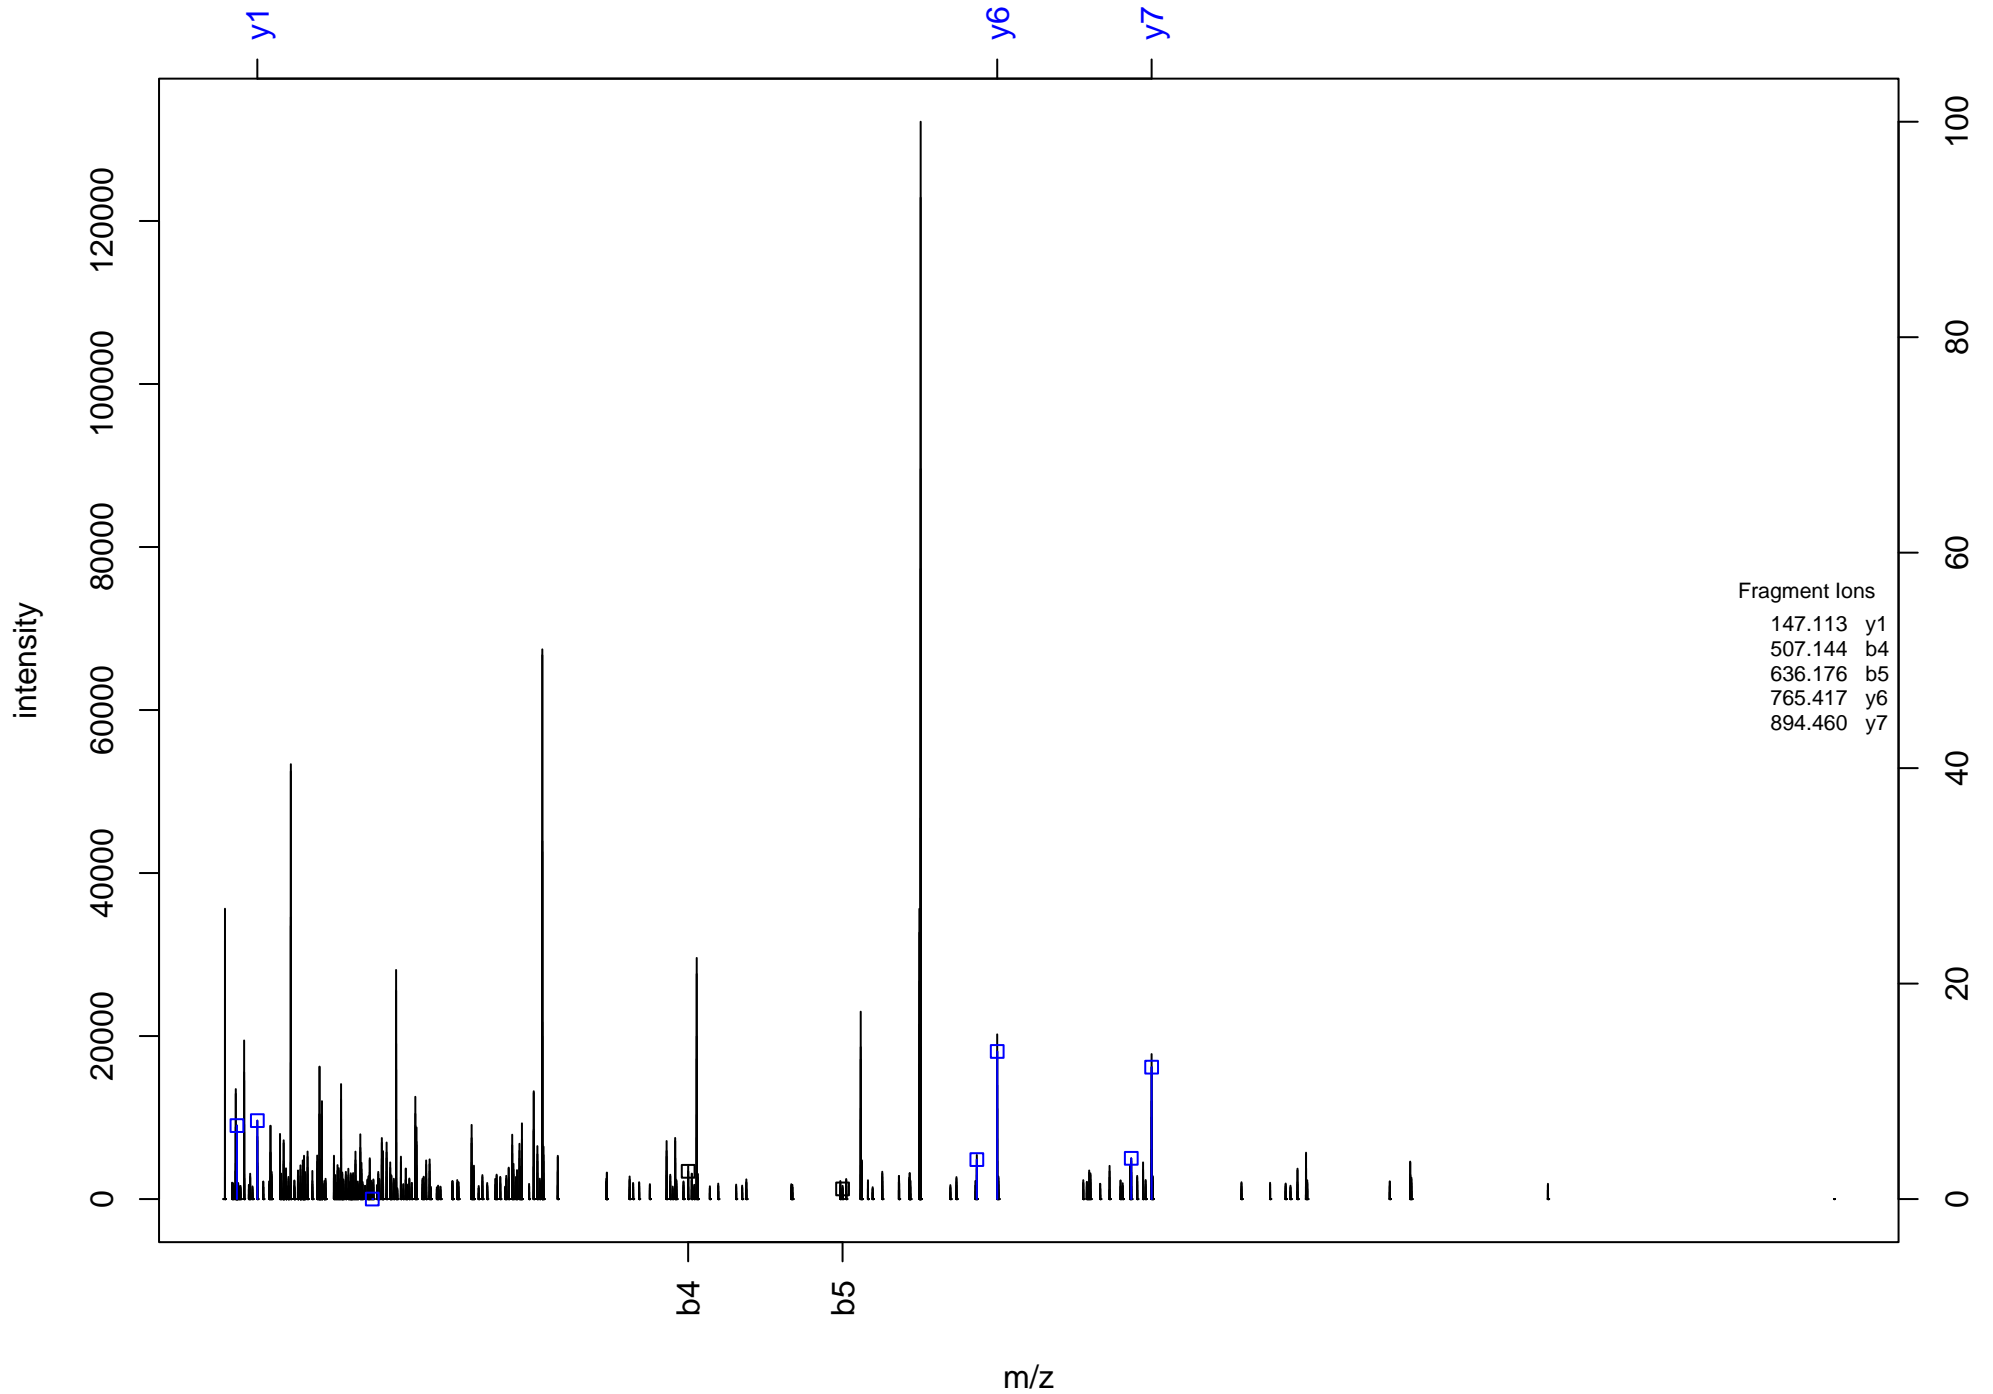

# LSLEGIVVQR

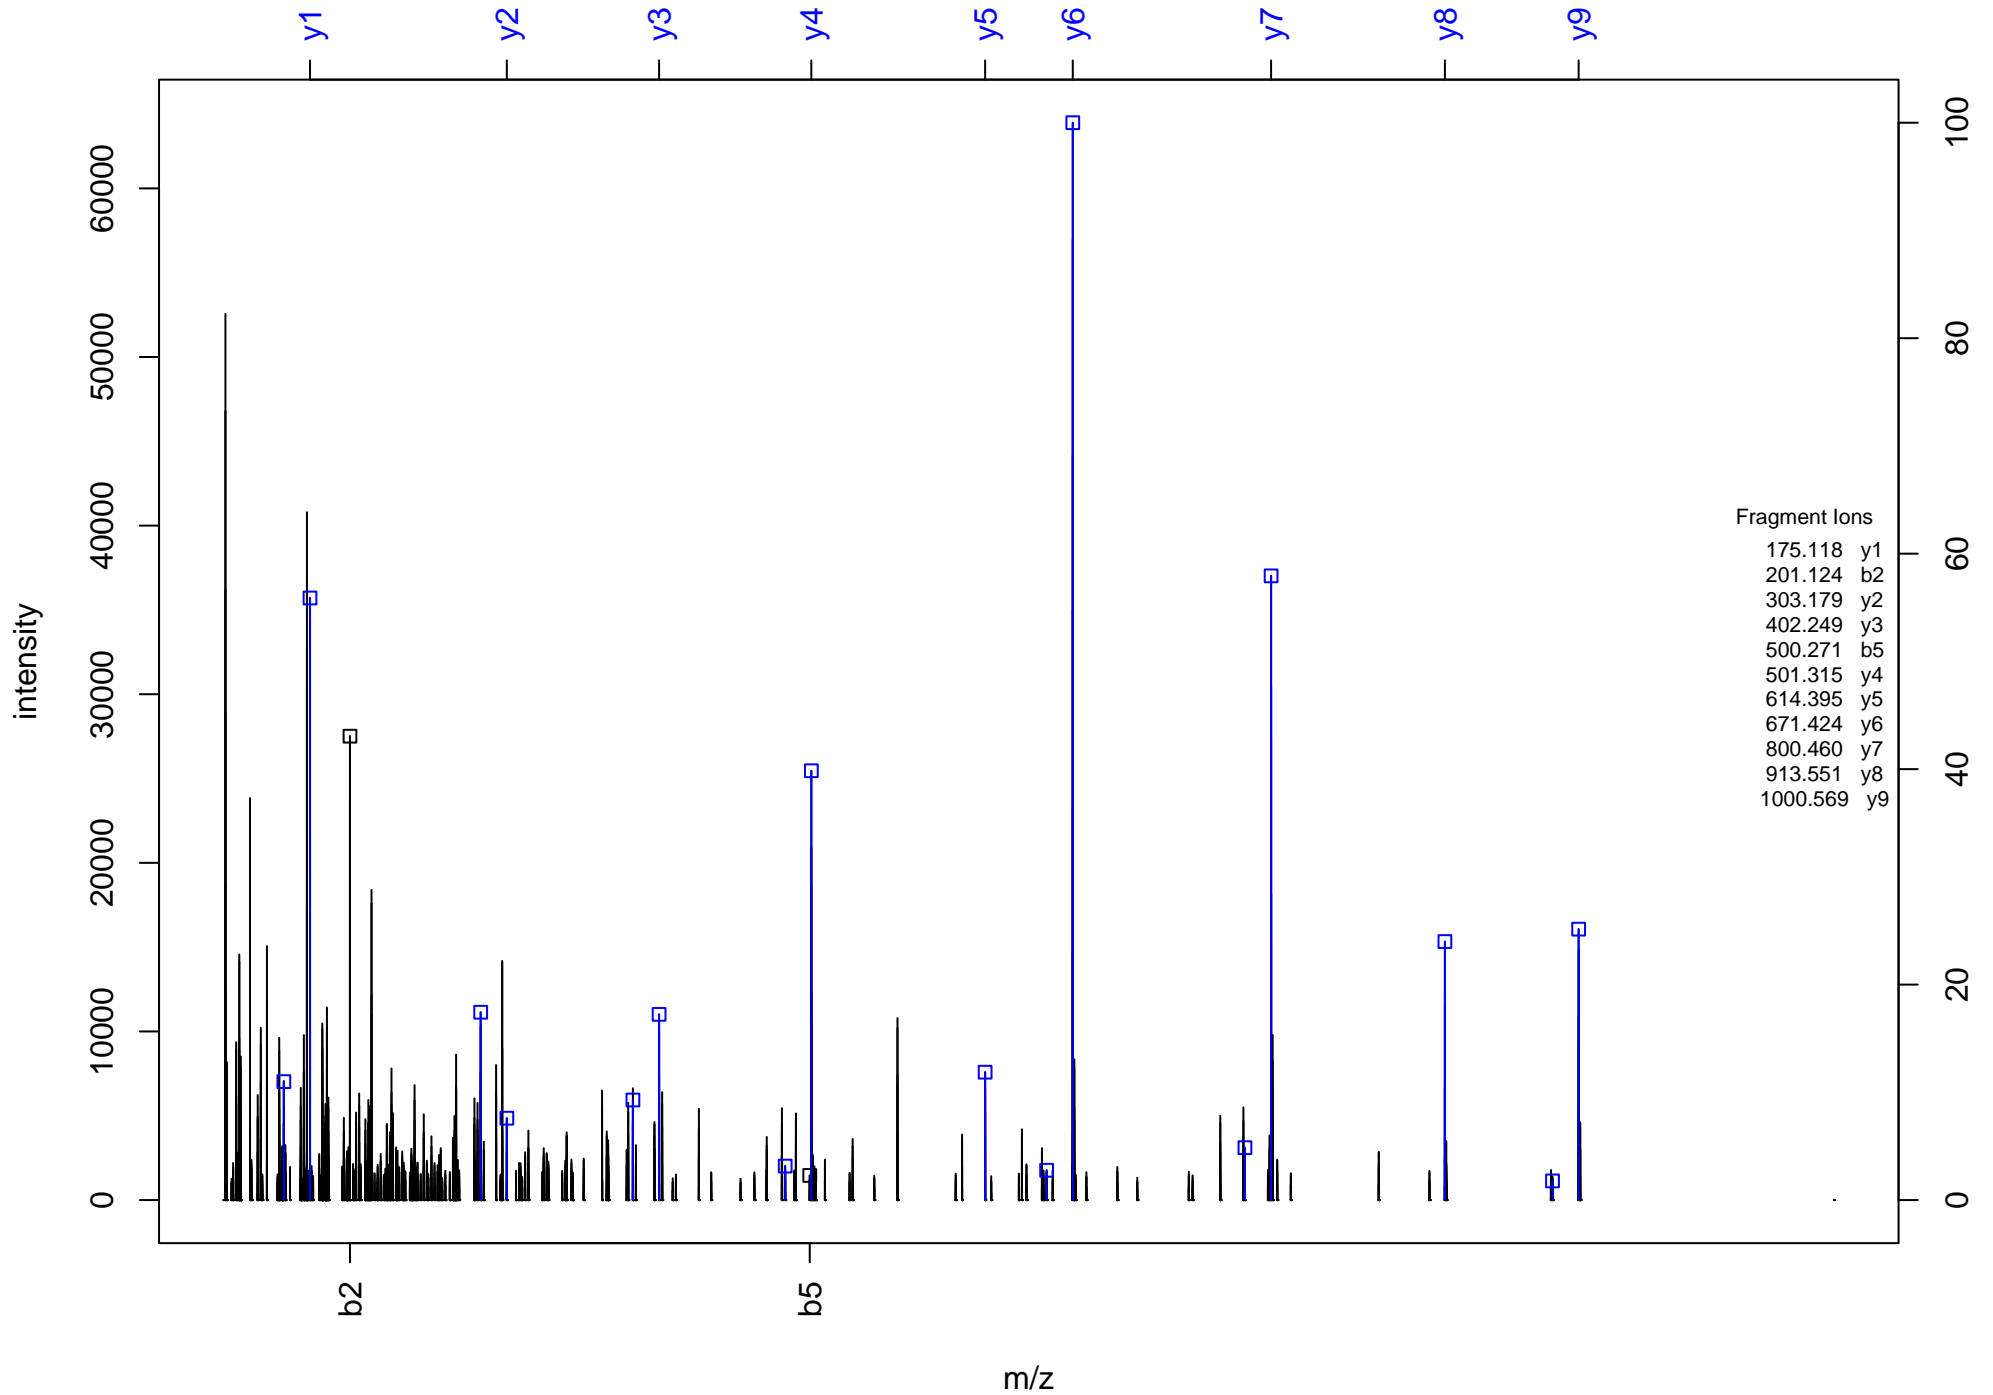

# SSVDSQGPTPVCTPTFLER

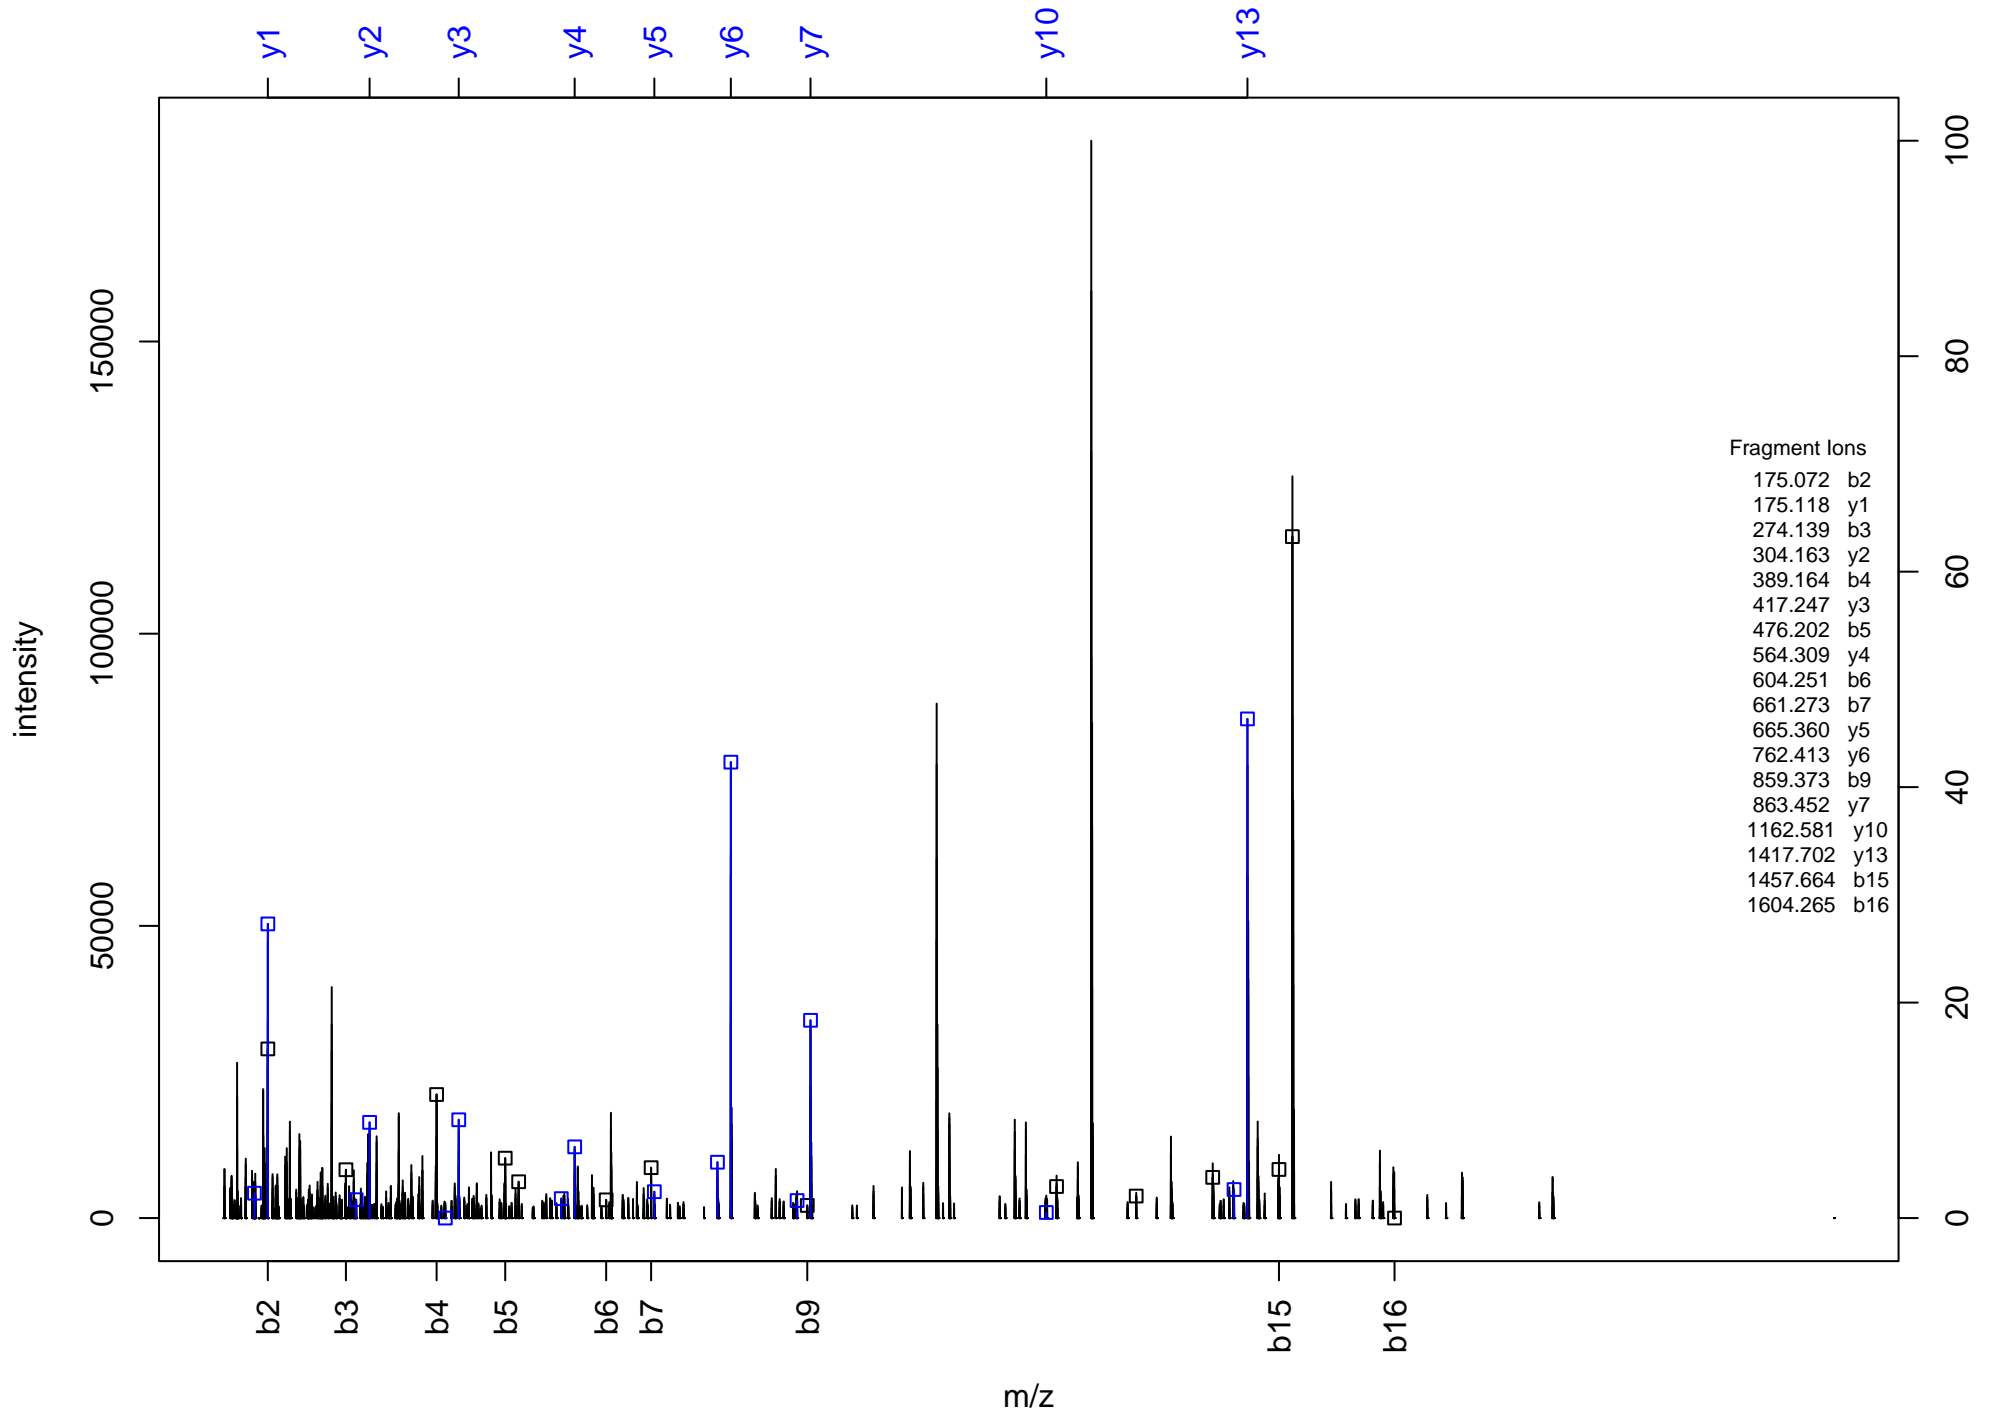

# QACAEPFEAFEK

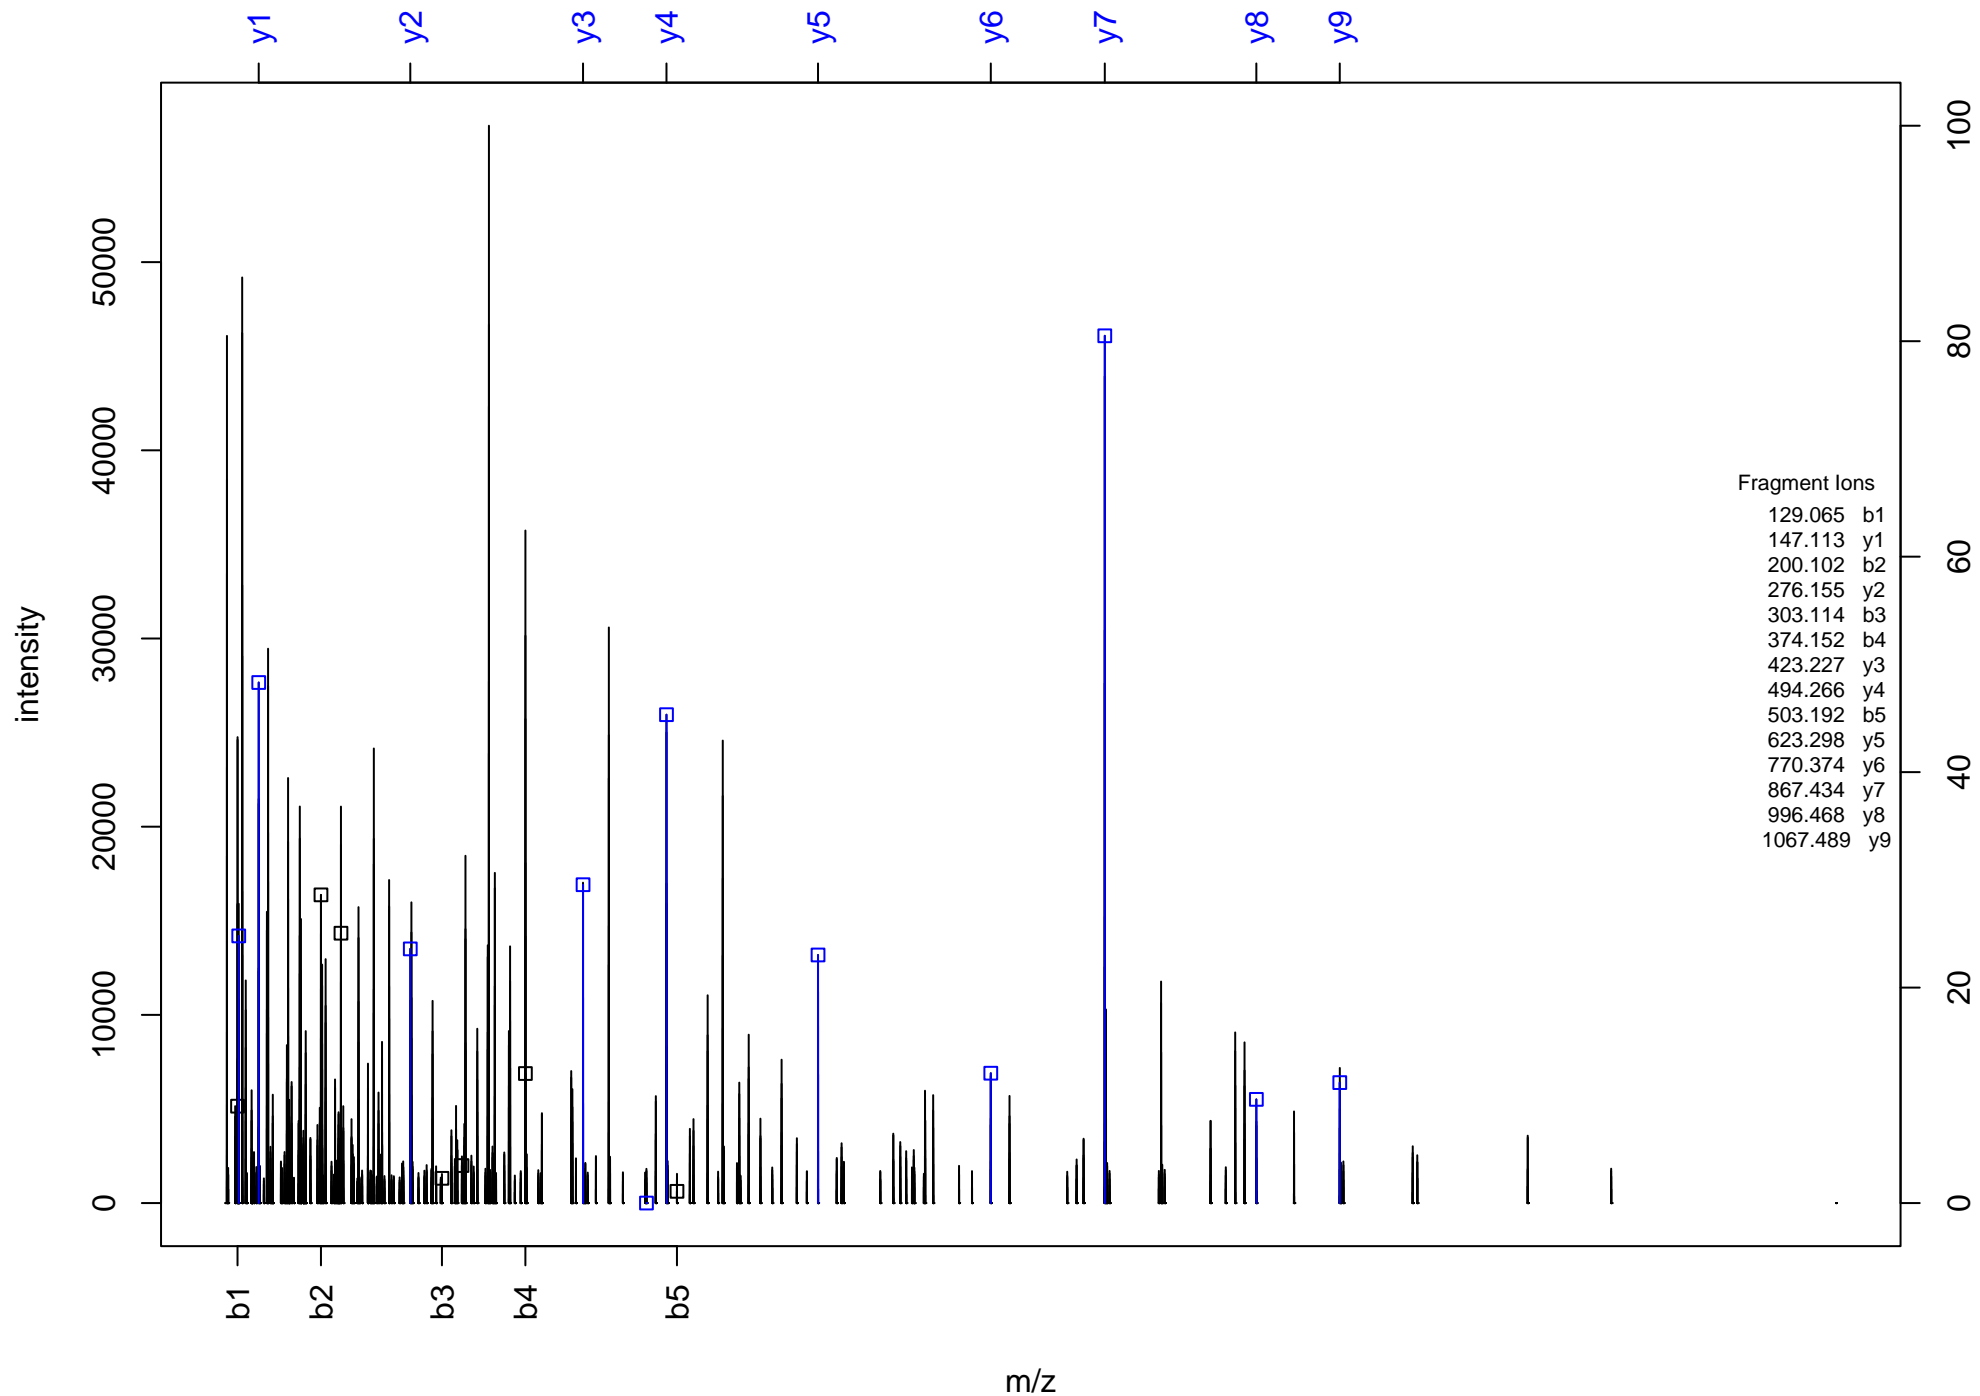

# LQQGLAANPSGYGPLTELPDWSFADGRPAPPMK

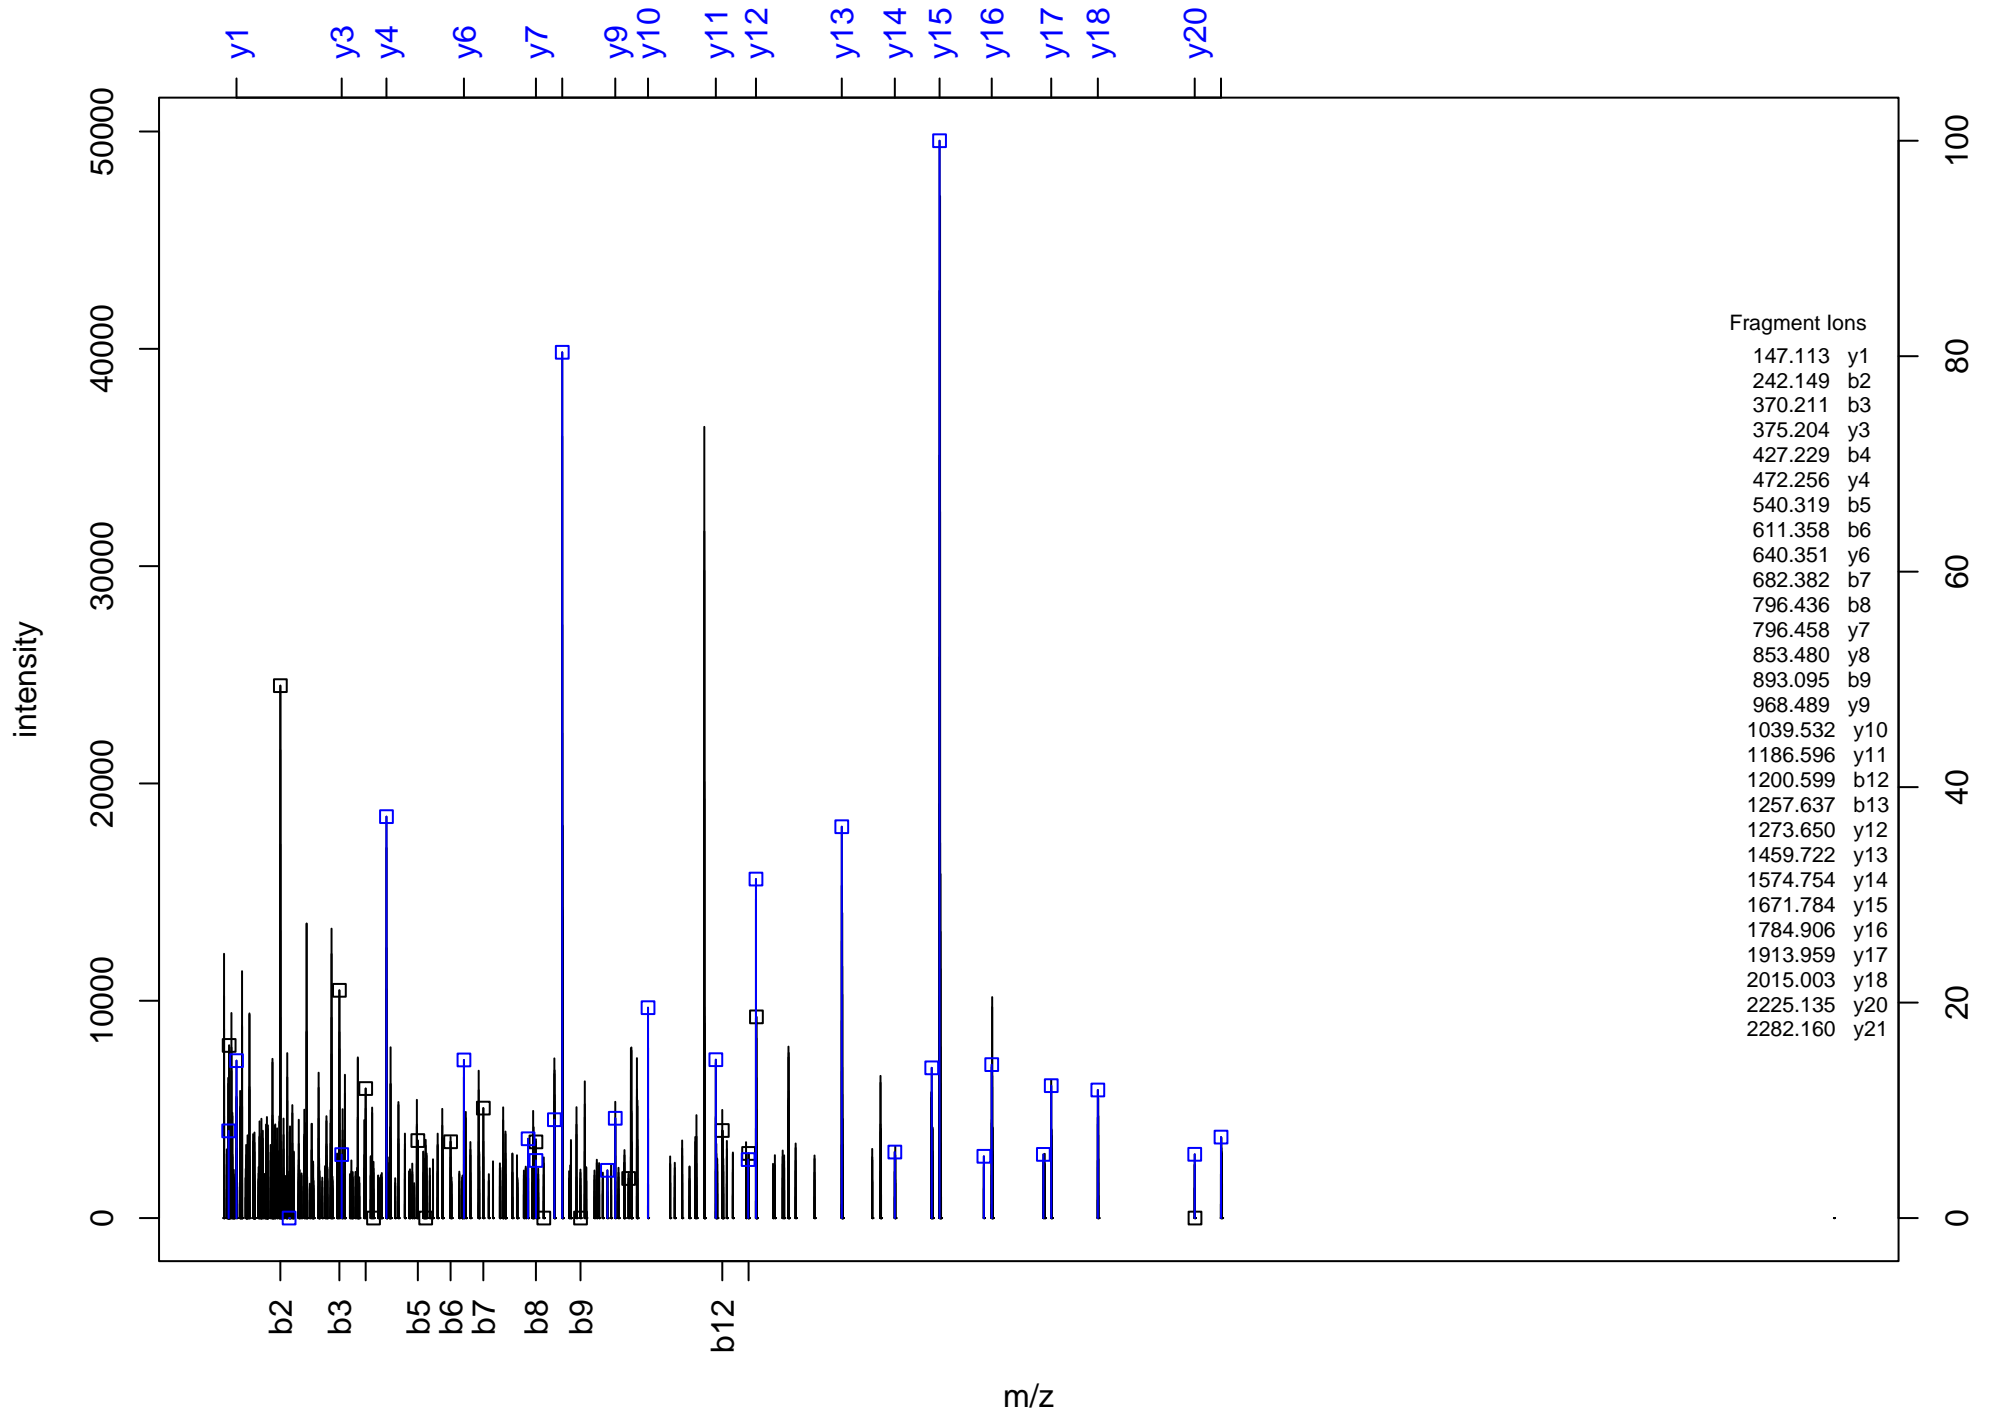



# KYQISQ^N^GEVR

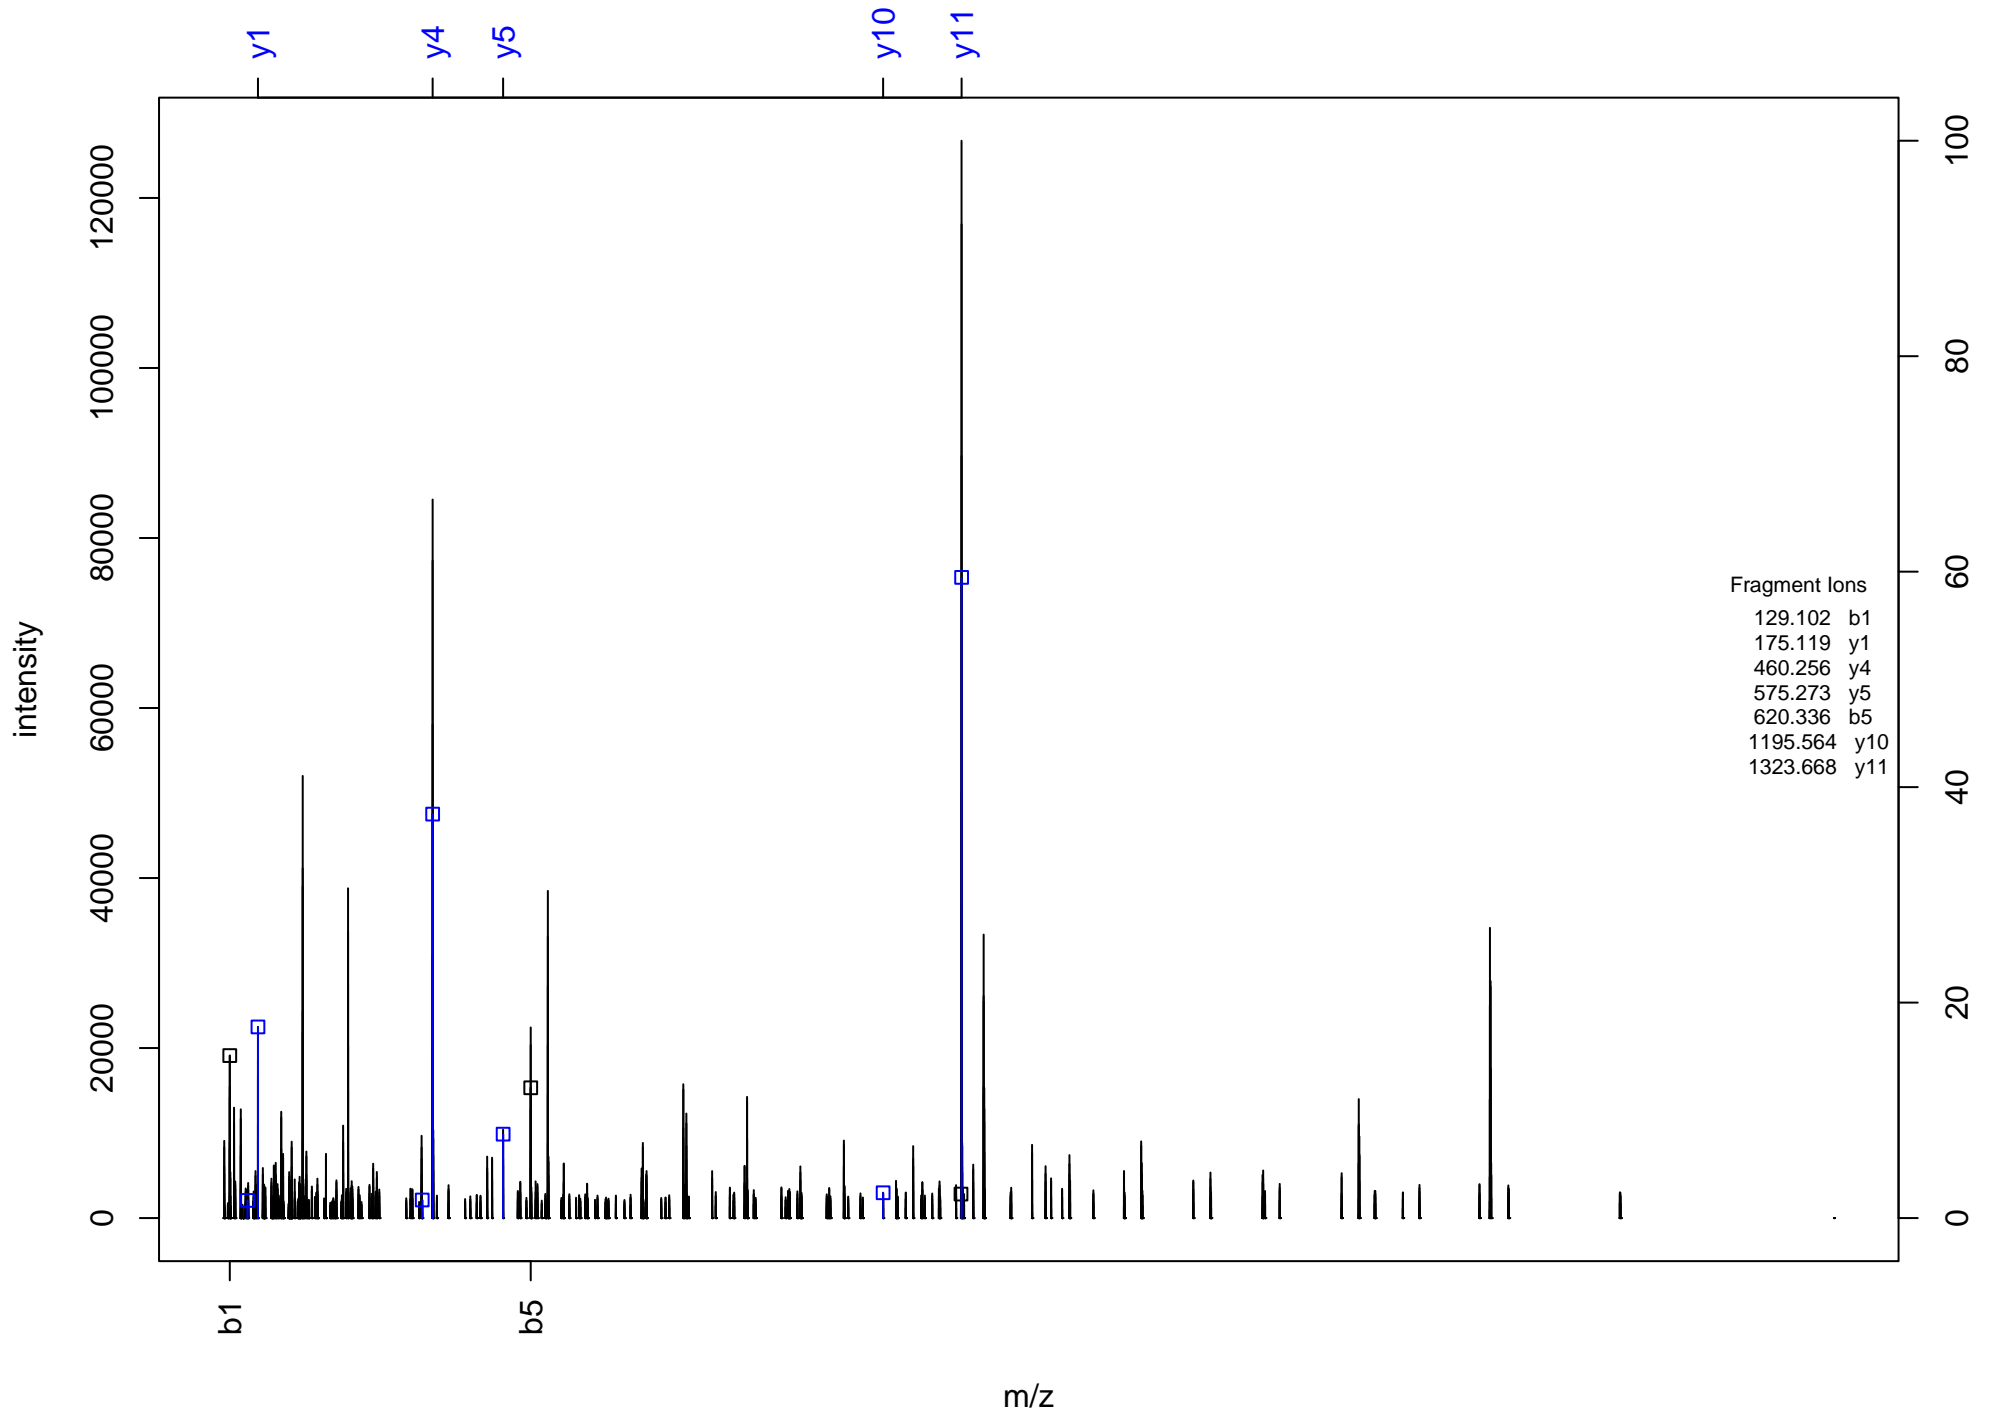

# FIMVPSGNMGVFDPTTEIHDR

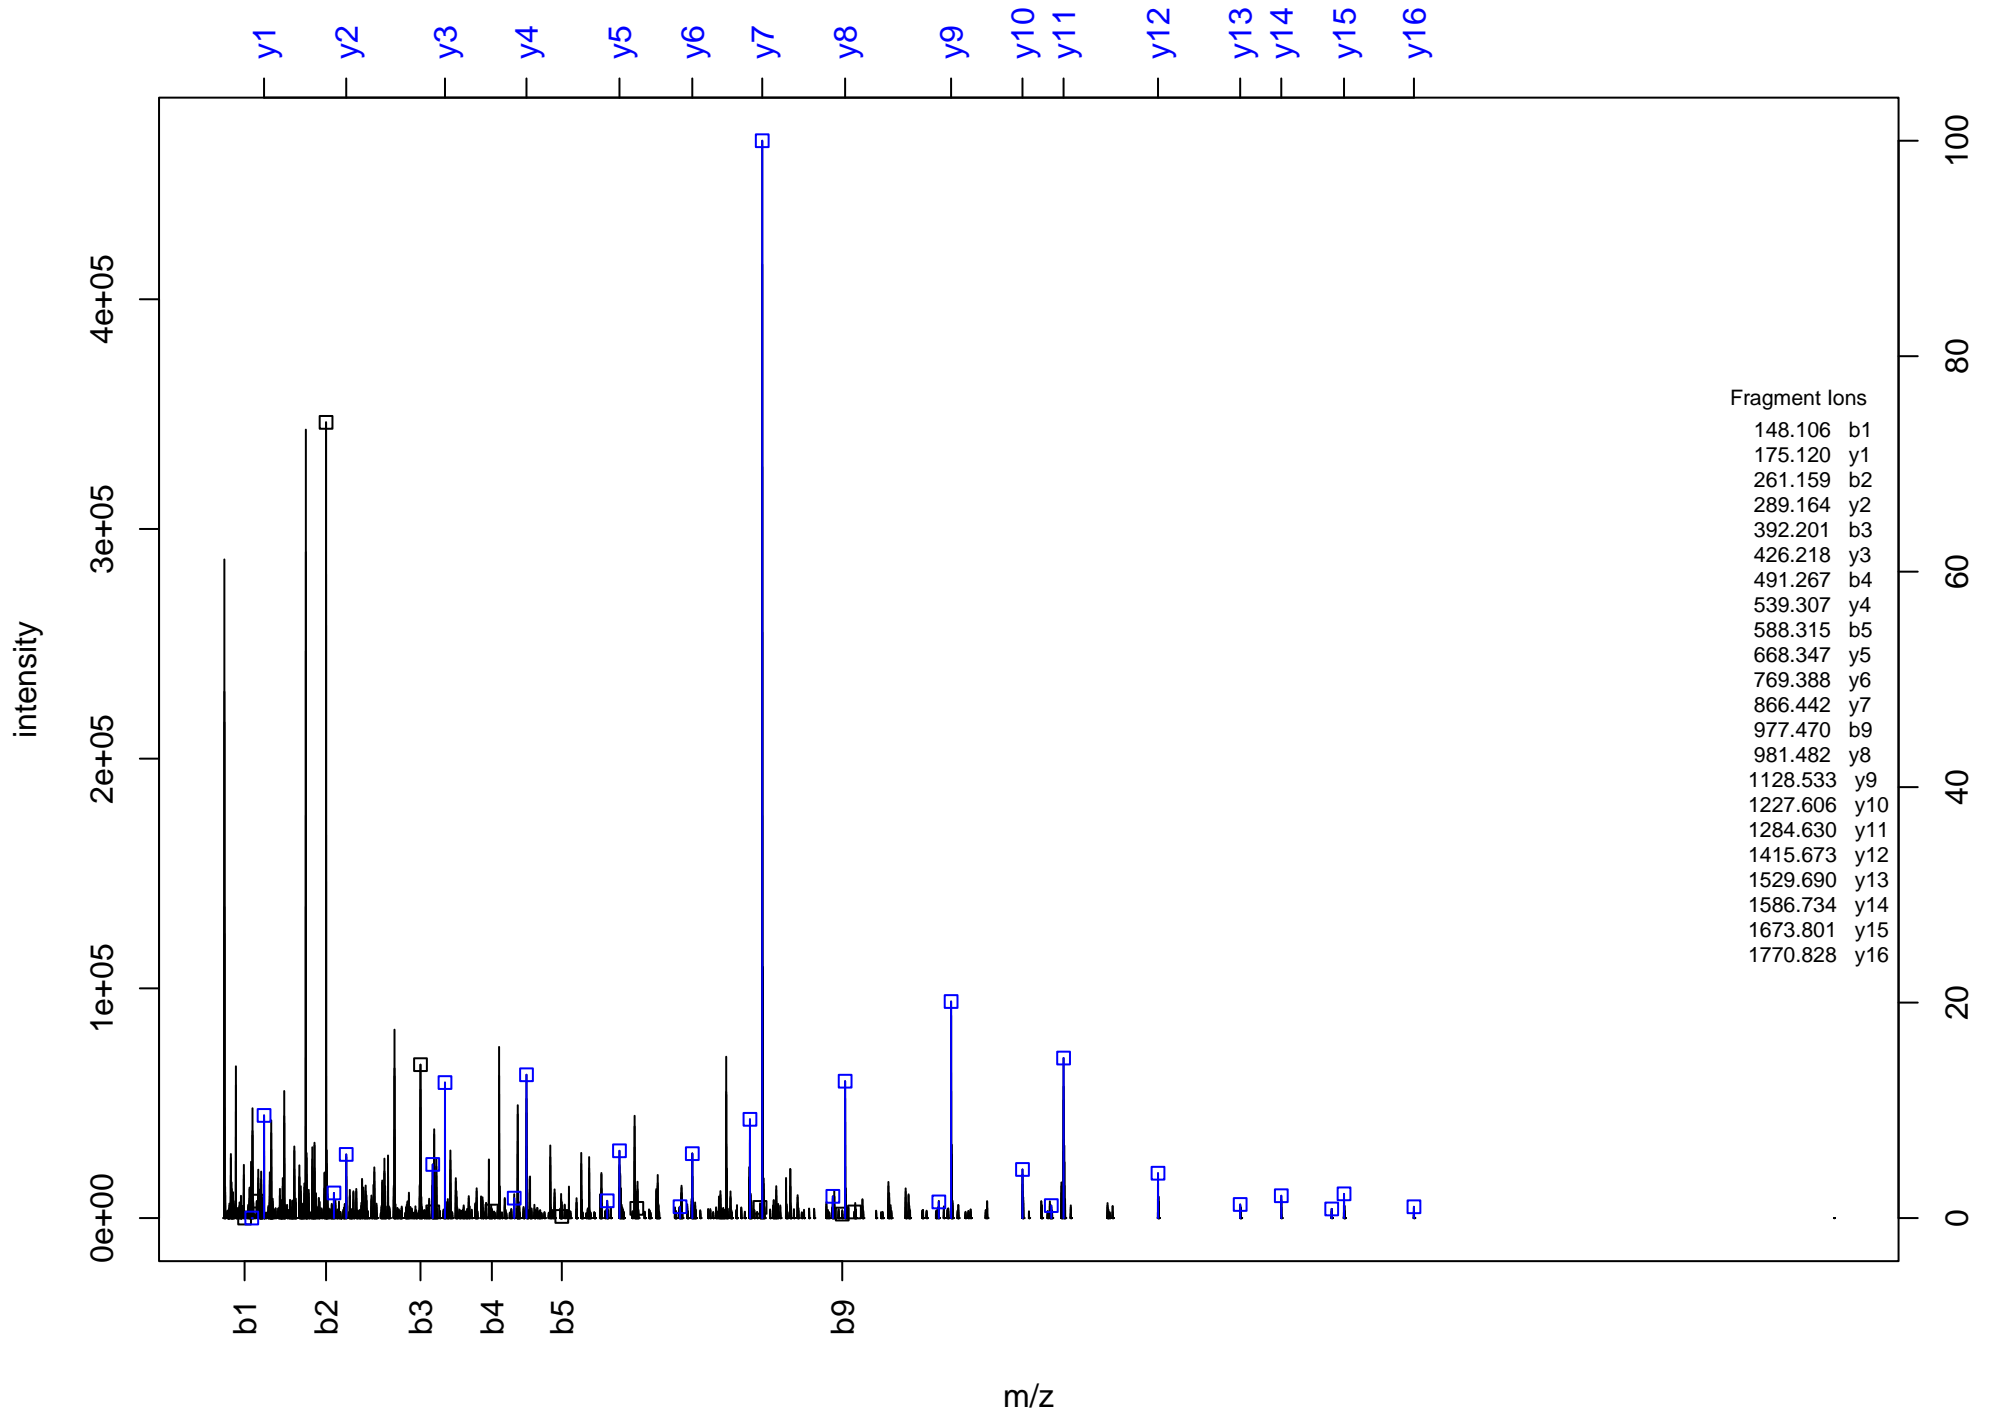

# NNWDQVDDFNWLAR

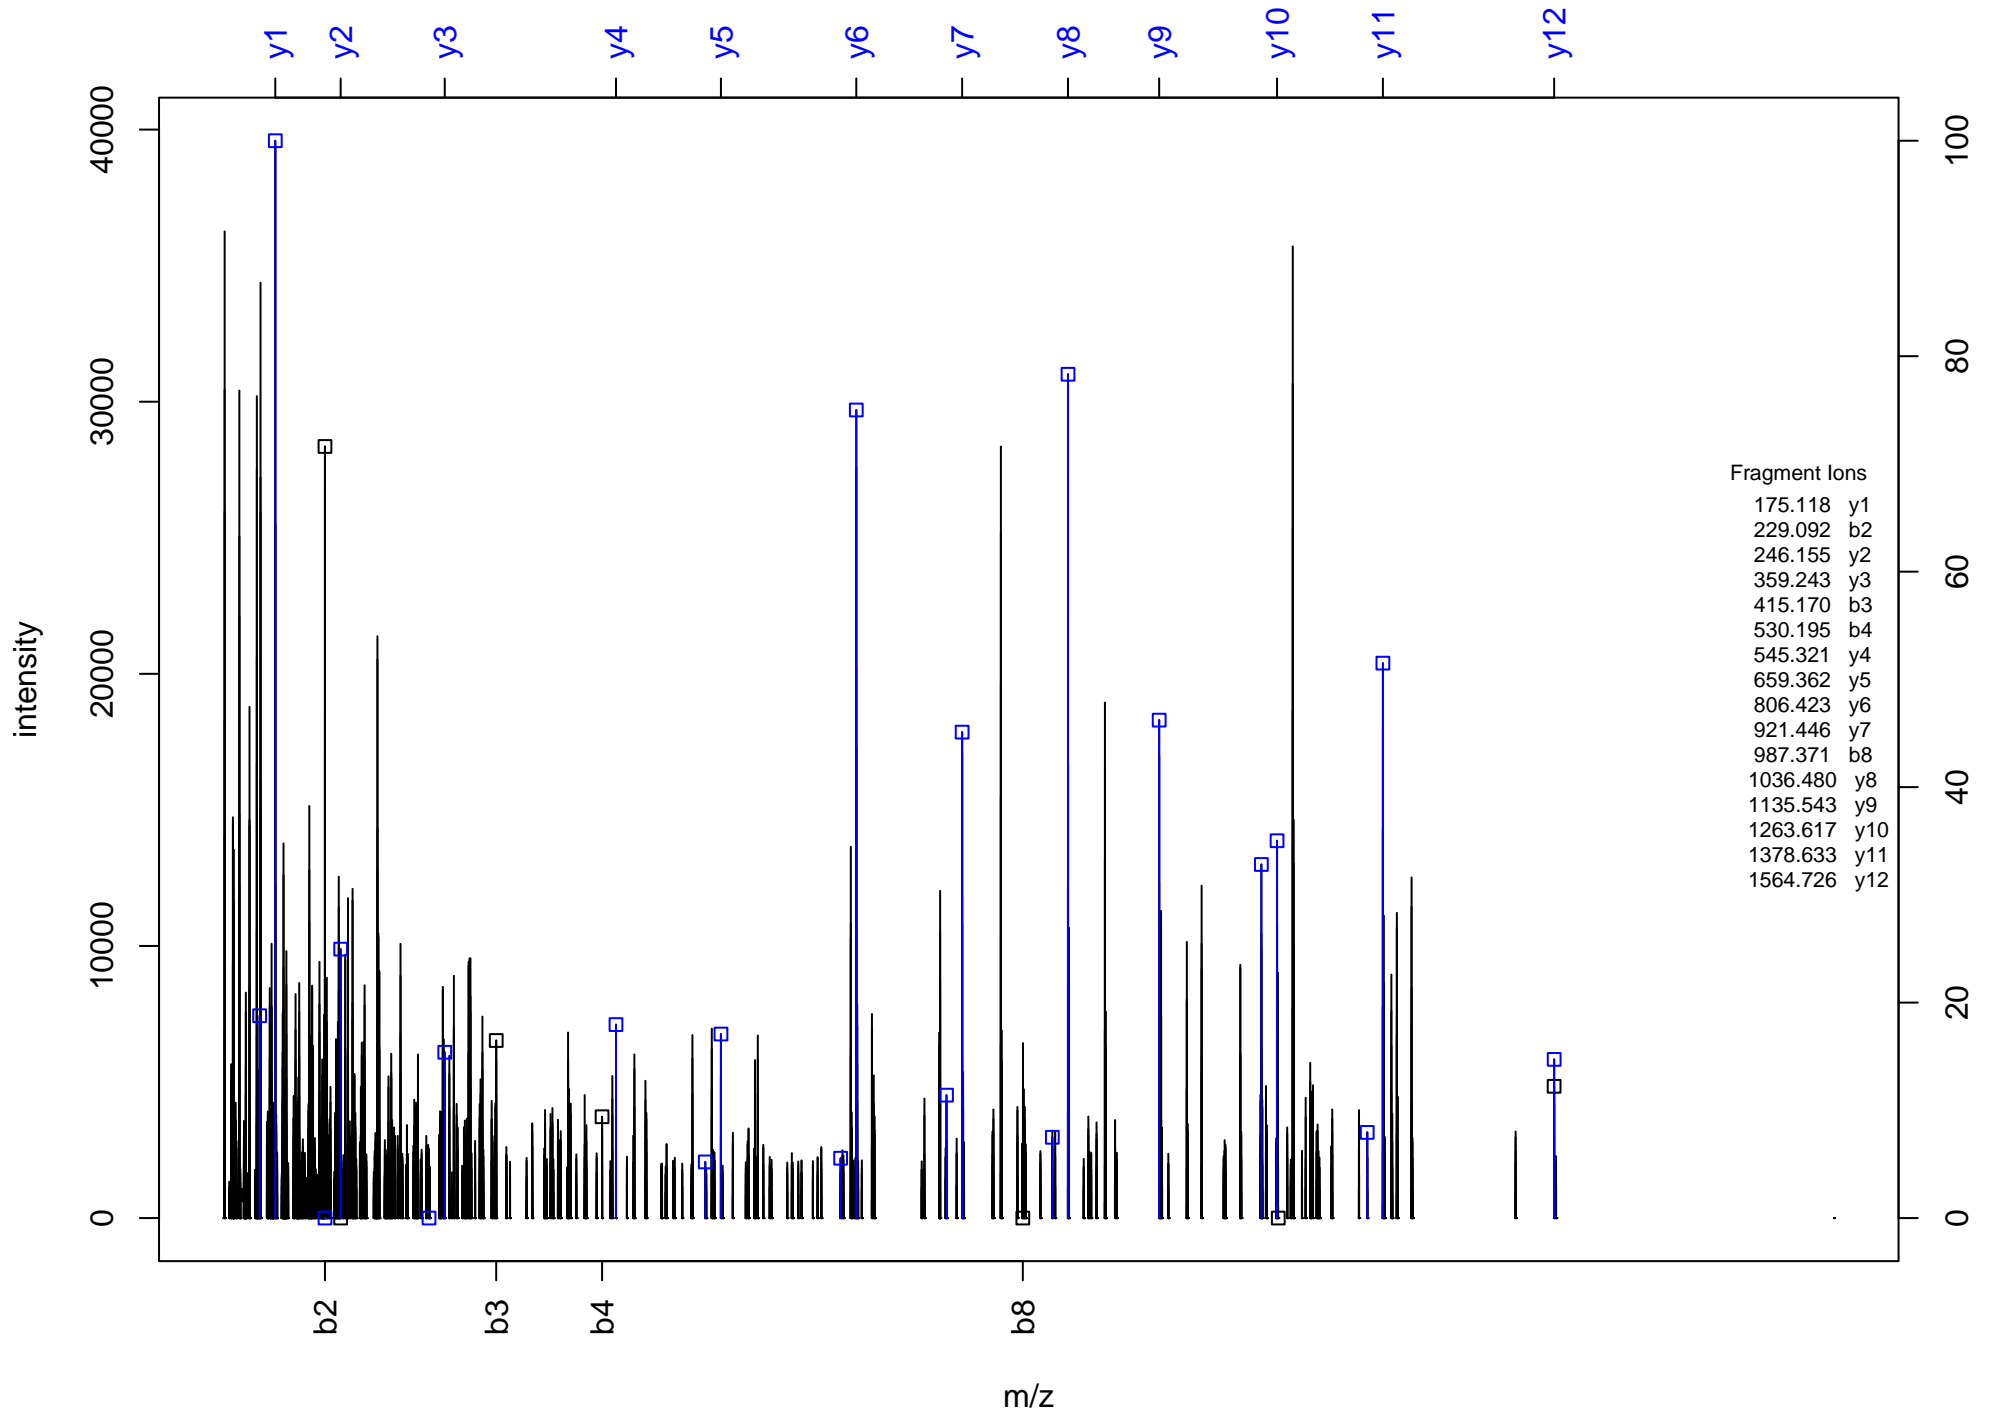

# YFEVDFPMIVTR

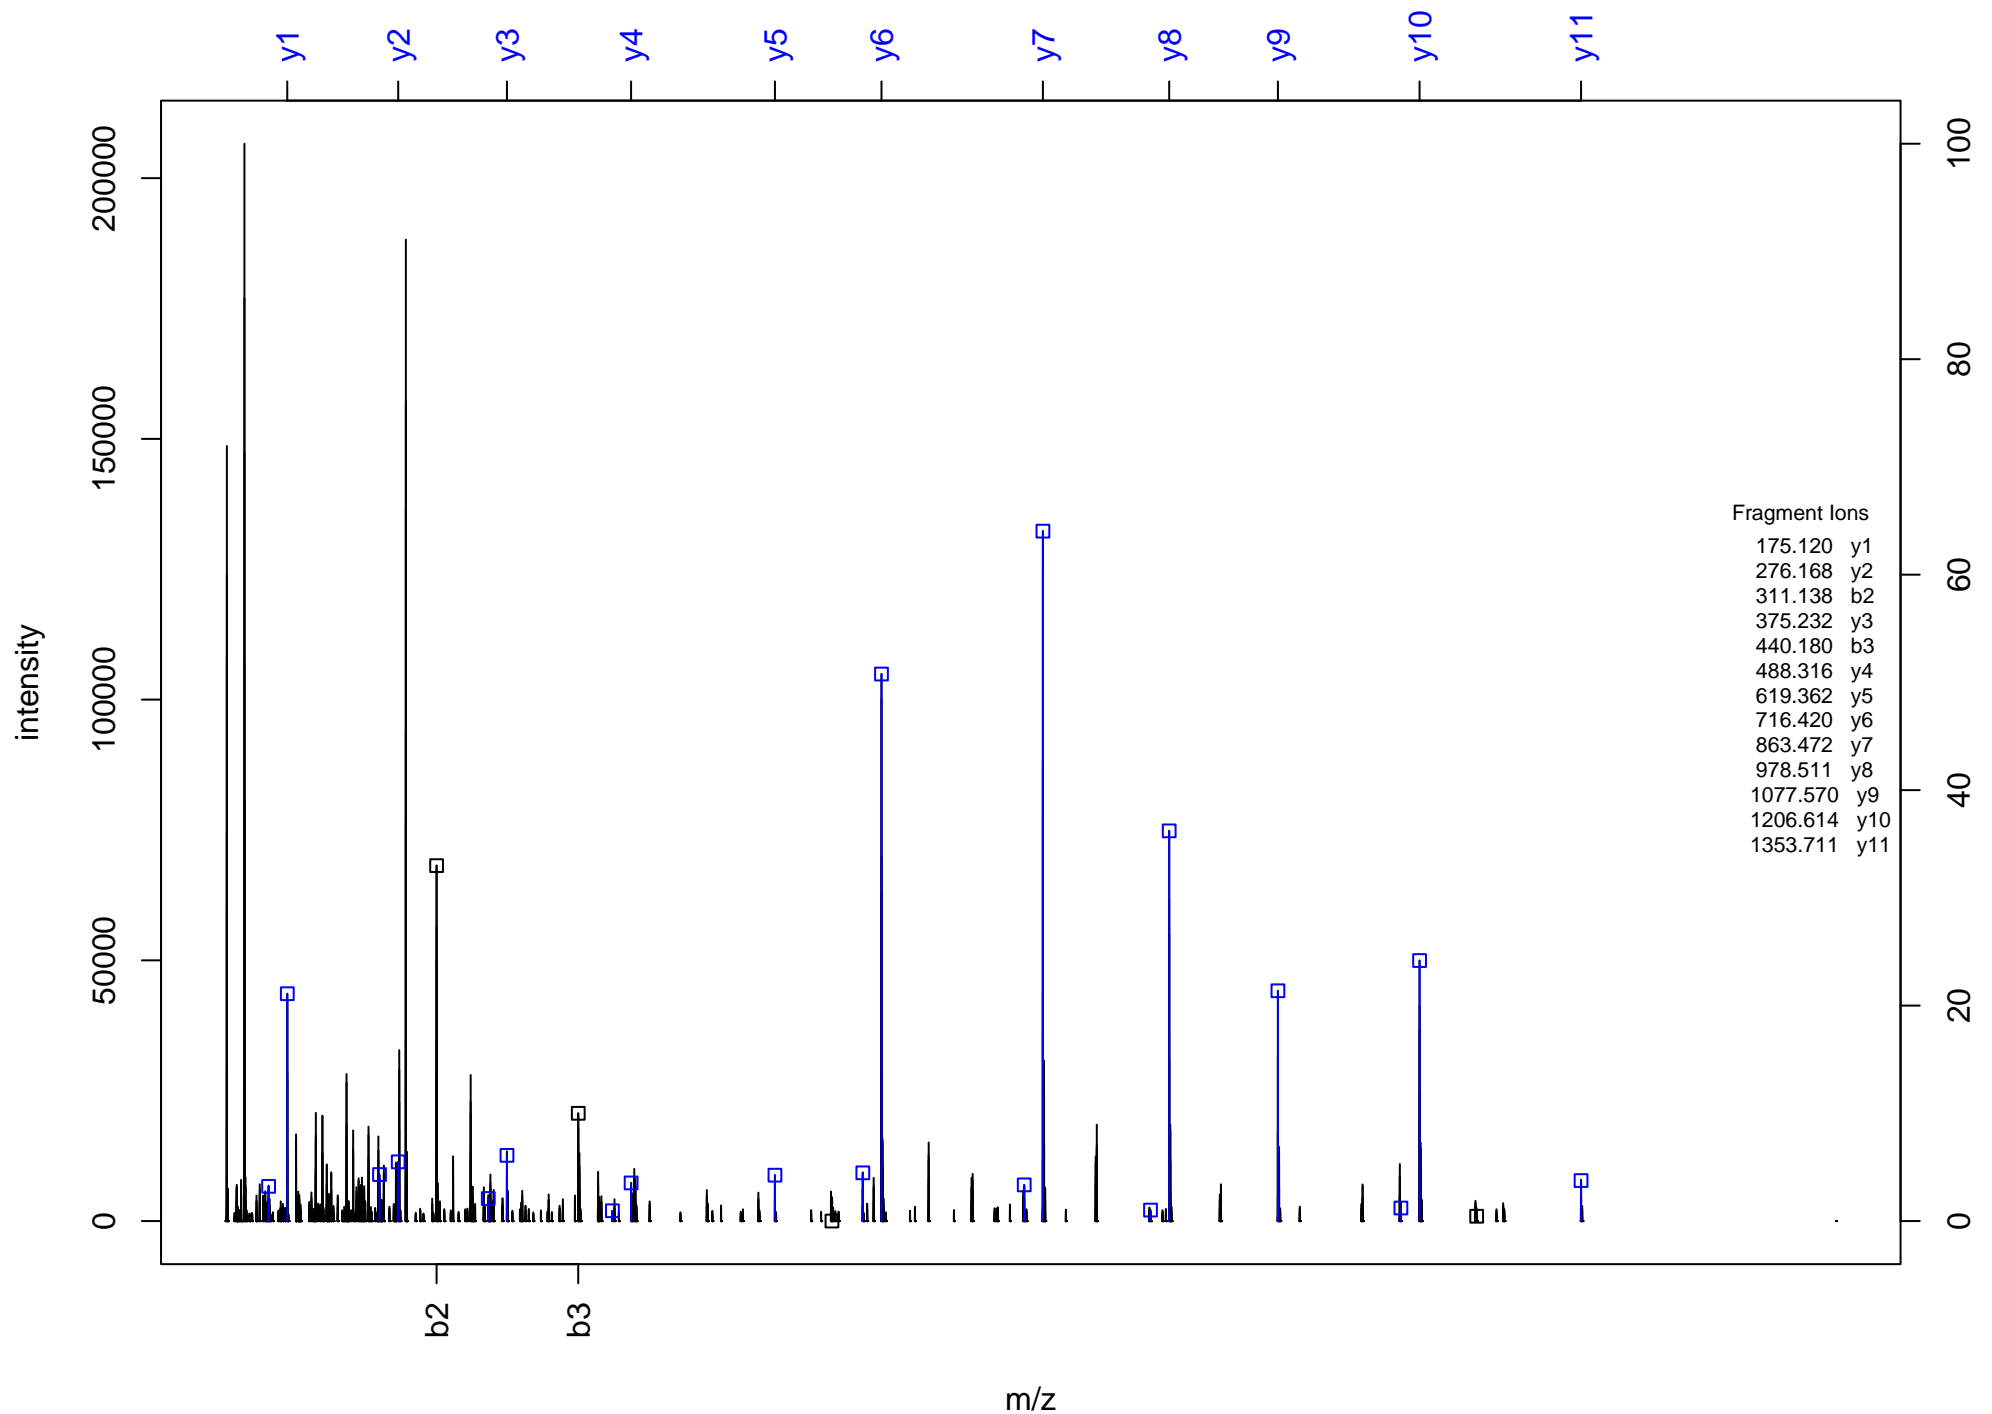

(Ac)M\*KDRLAELQ^ELSR

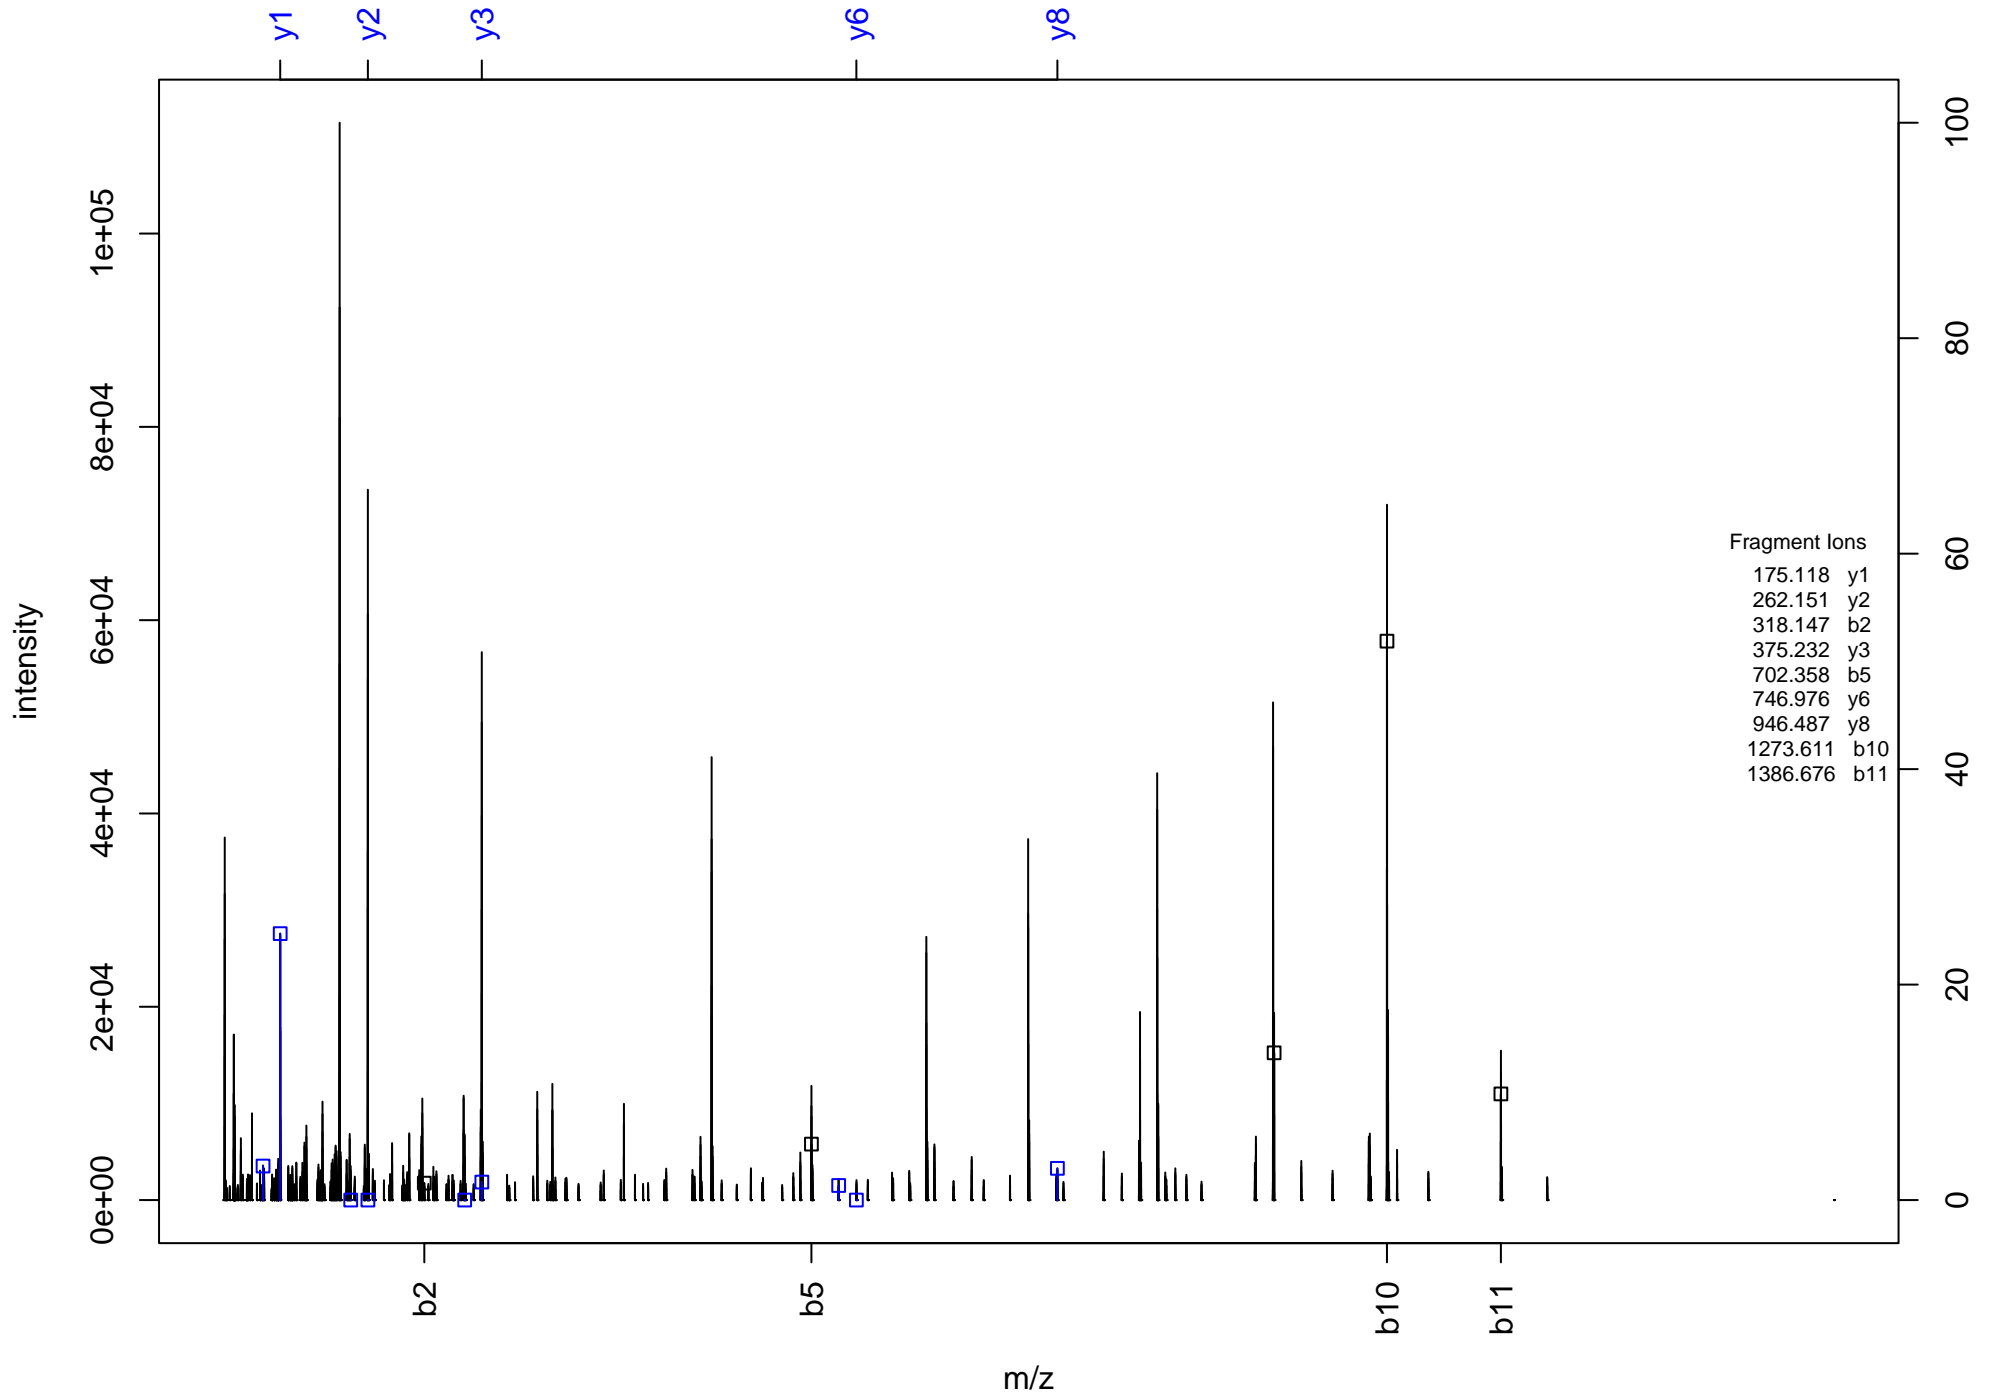

# GFFNALHSELGQYPGITFCNVYPPGPVQSDIVK

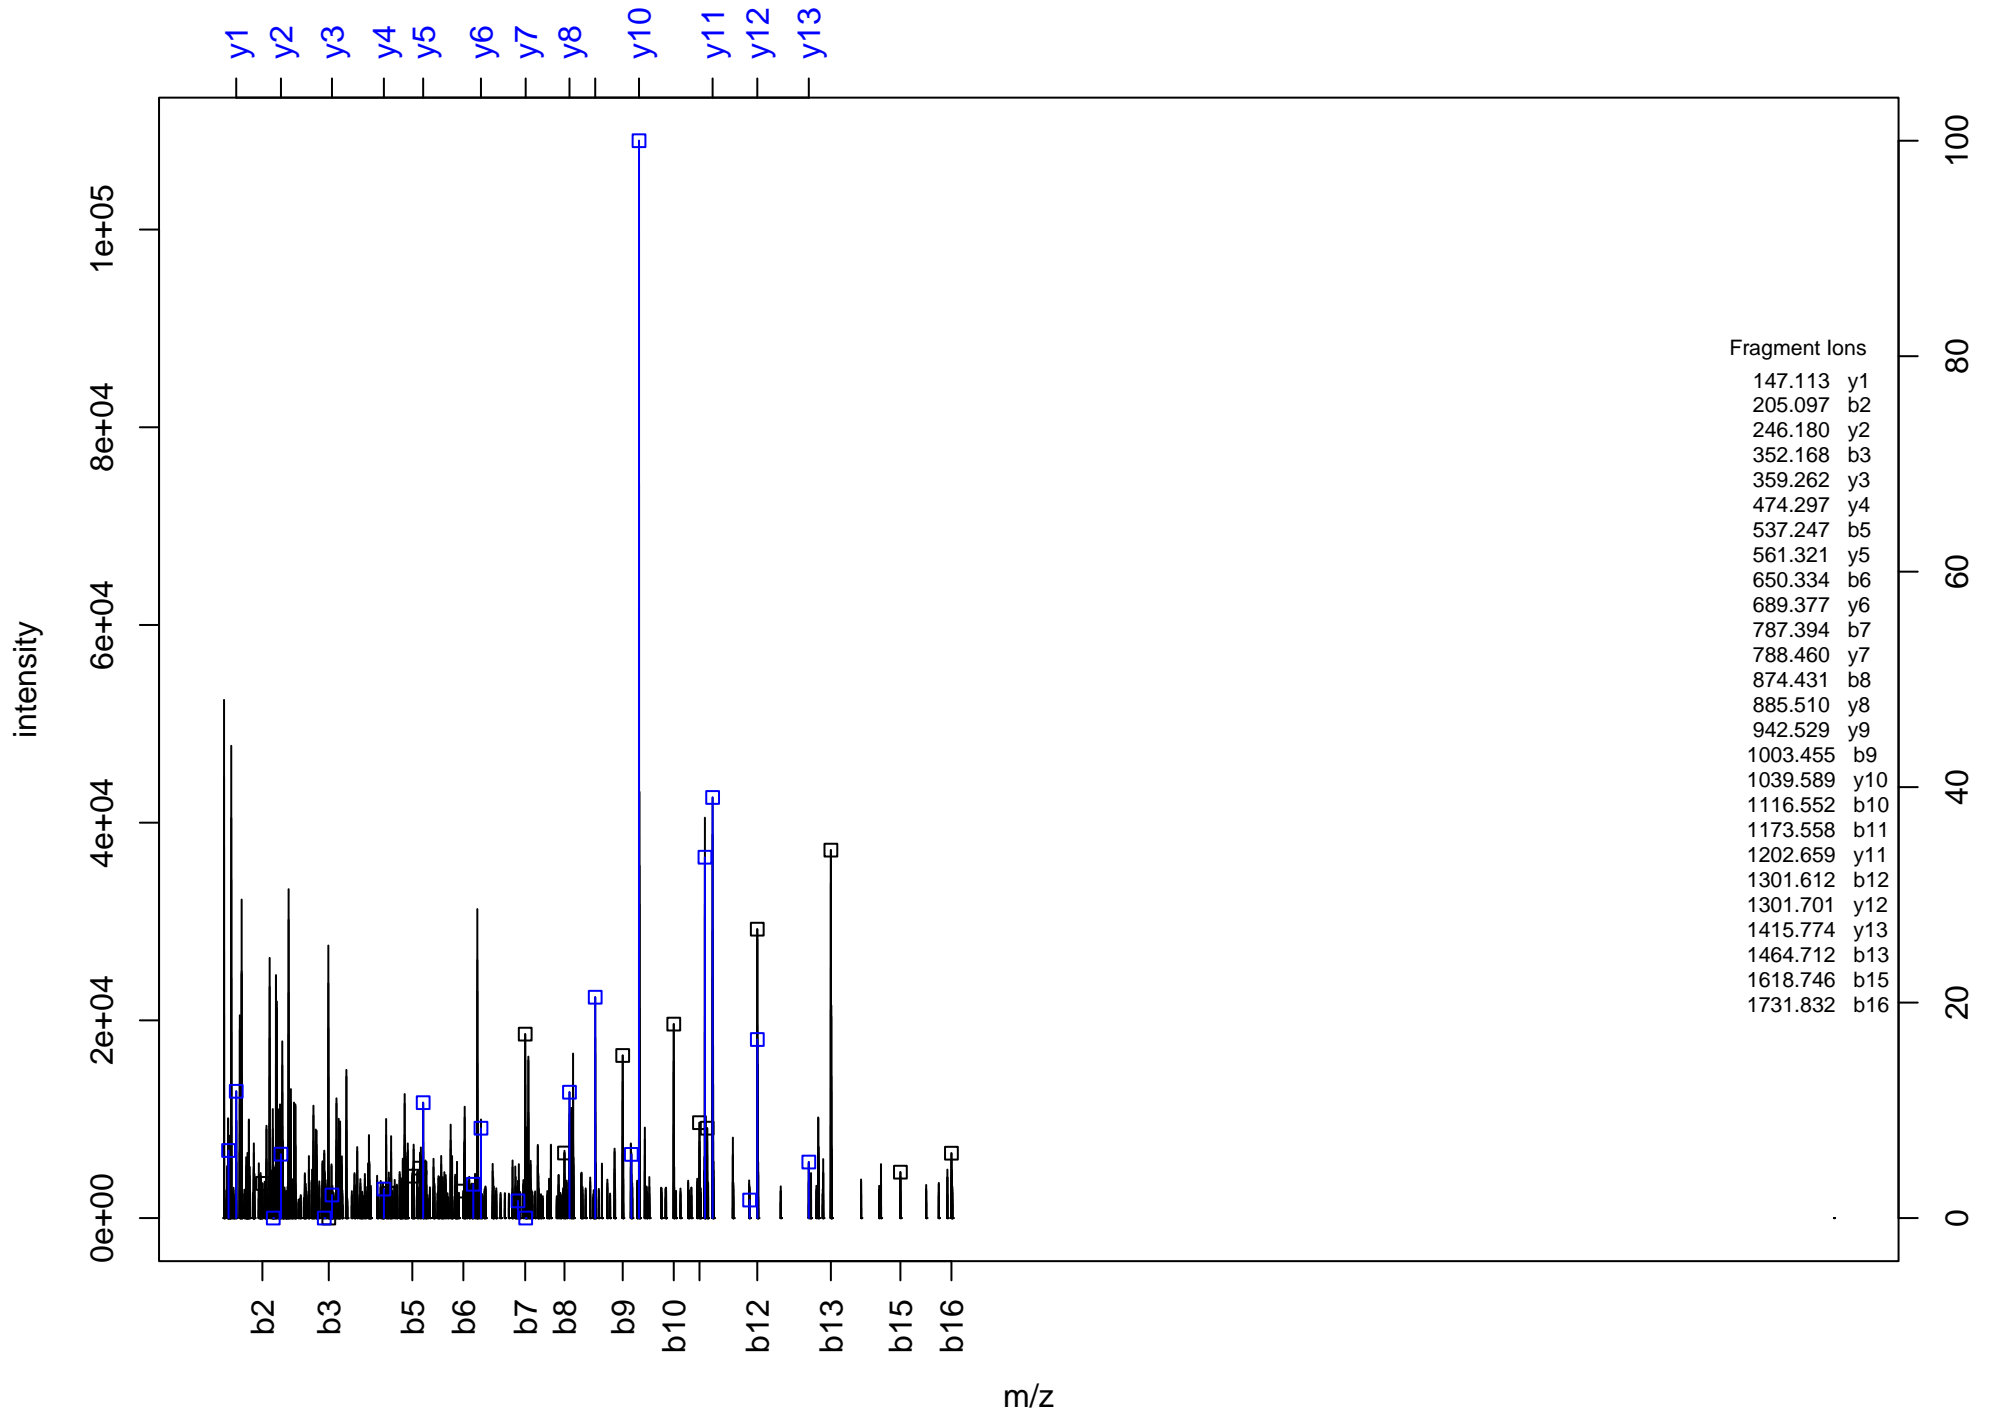

# (Ac)AEGGQAQQQPPQLGPGAAAR

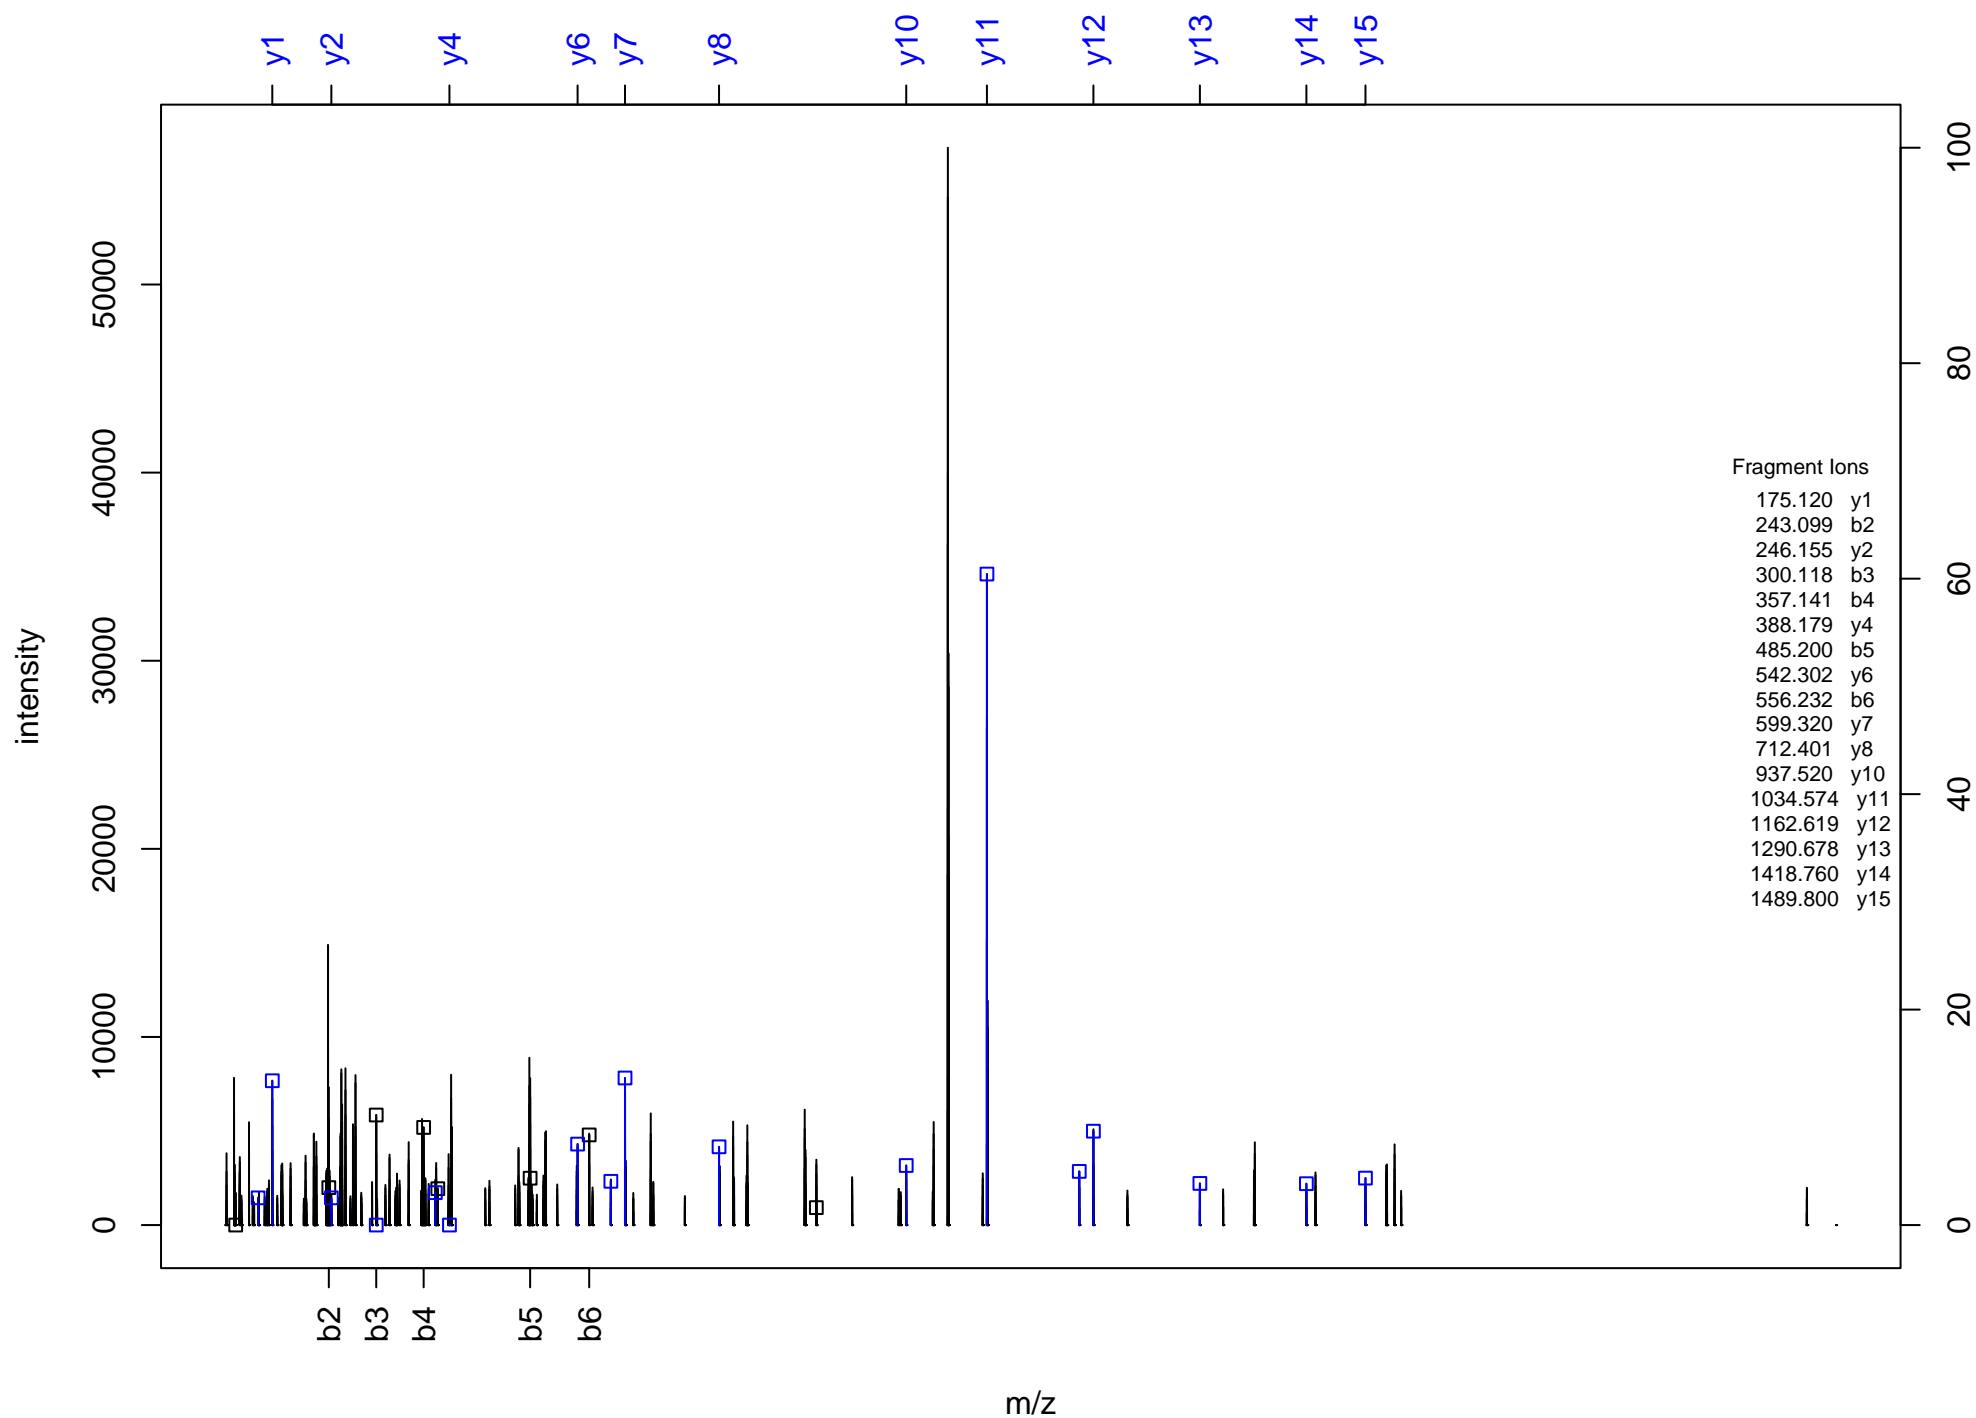

# EELAPQEPQWSLPSK

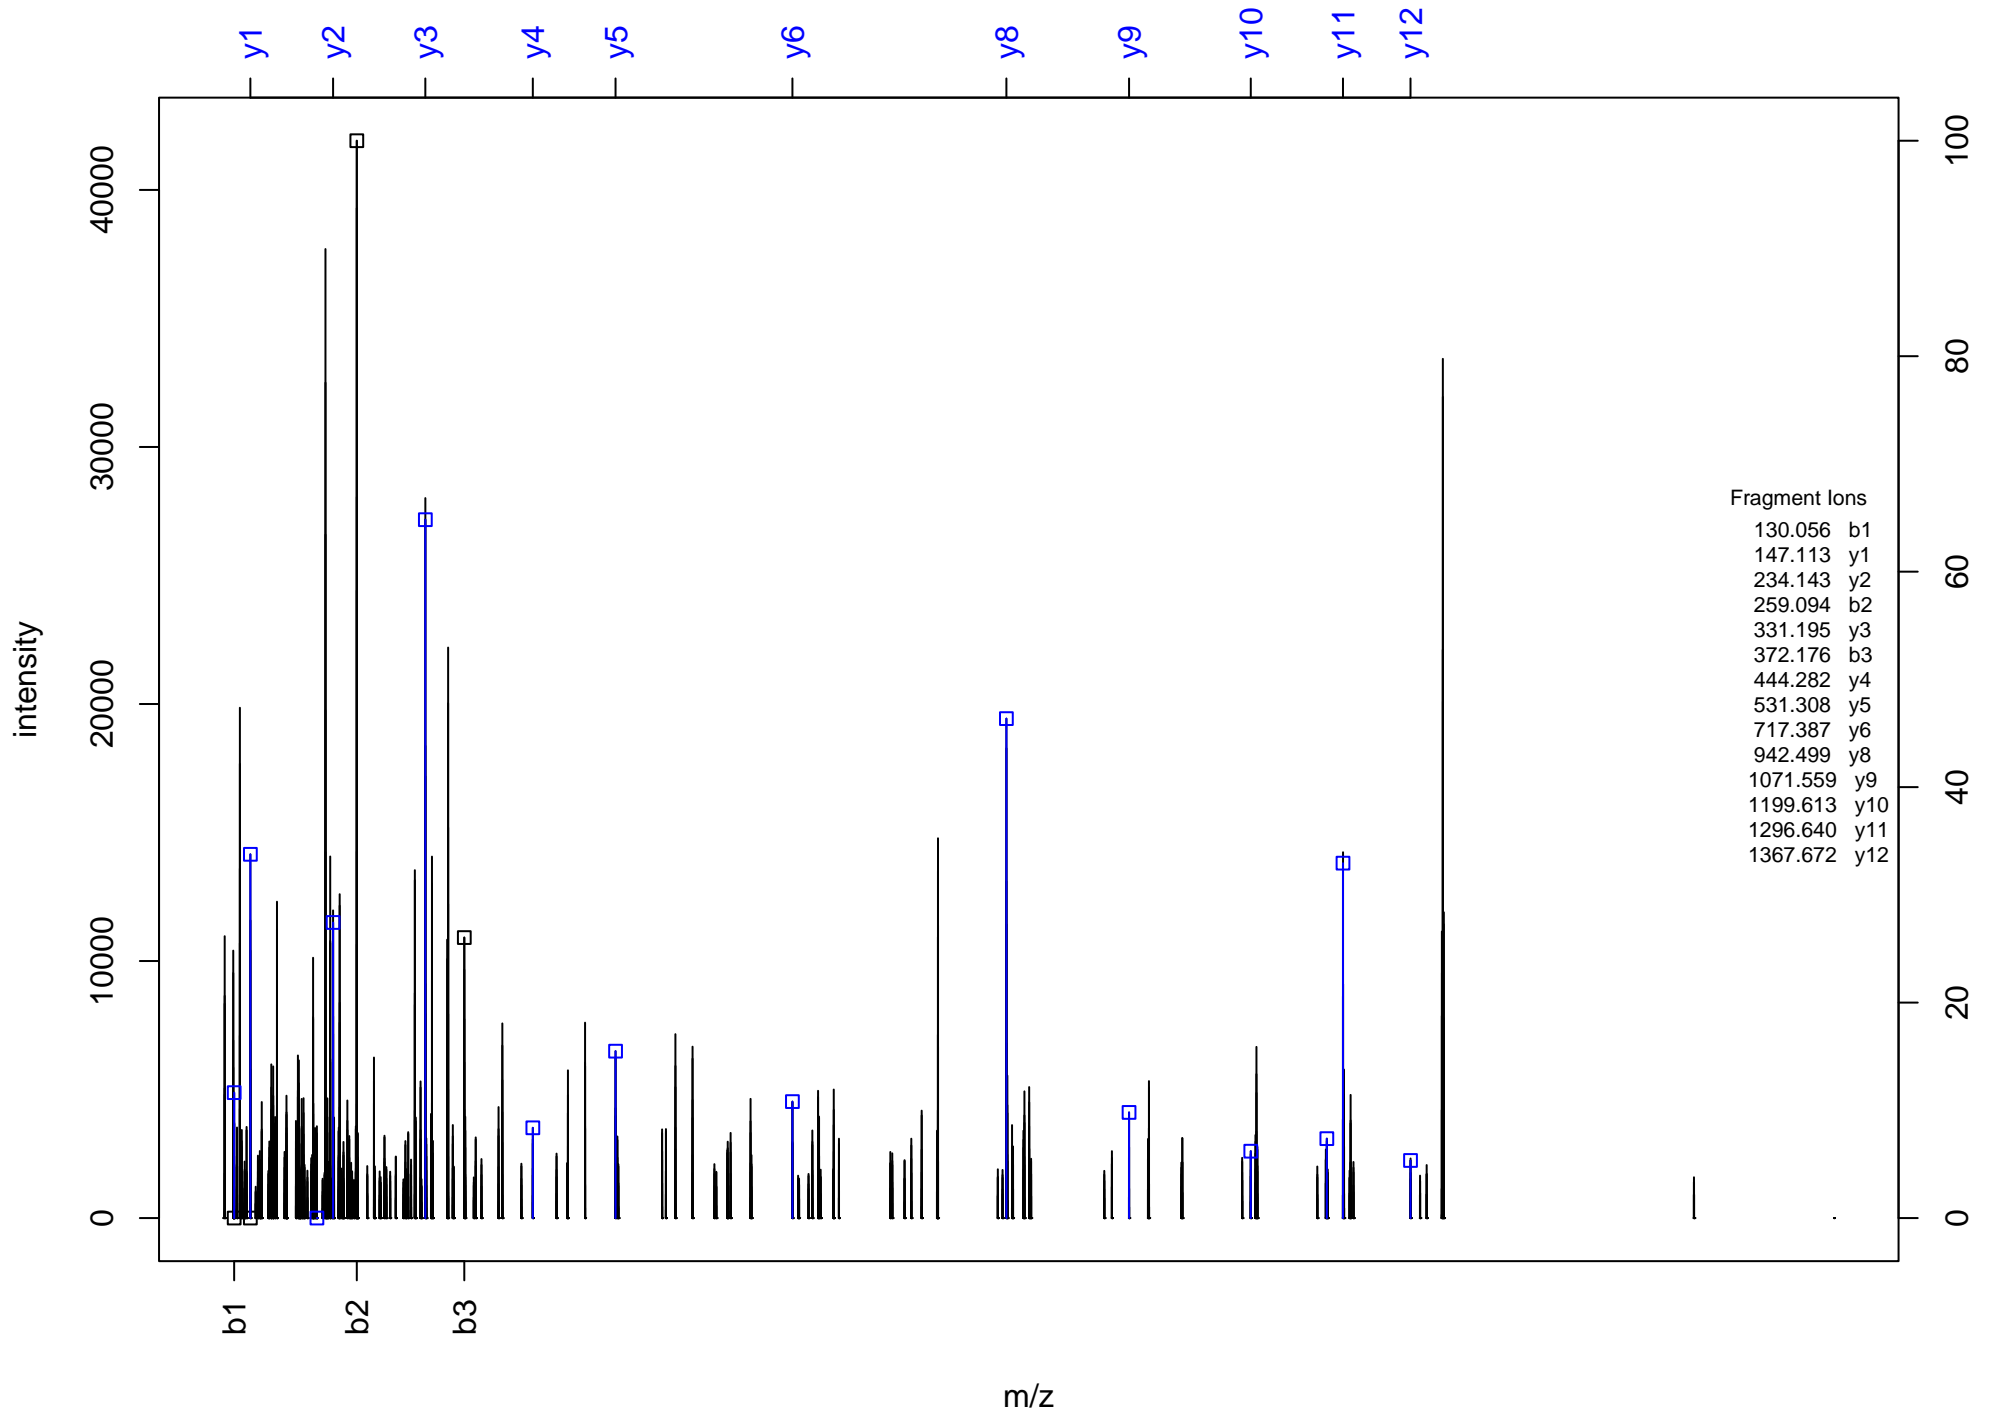



# ENDPSNVLLFLVGSK

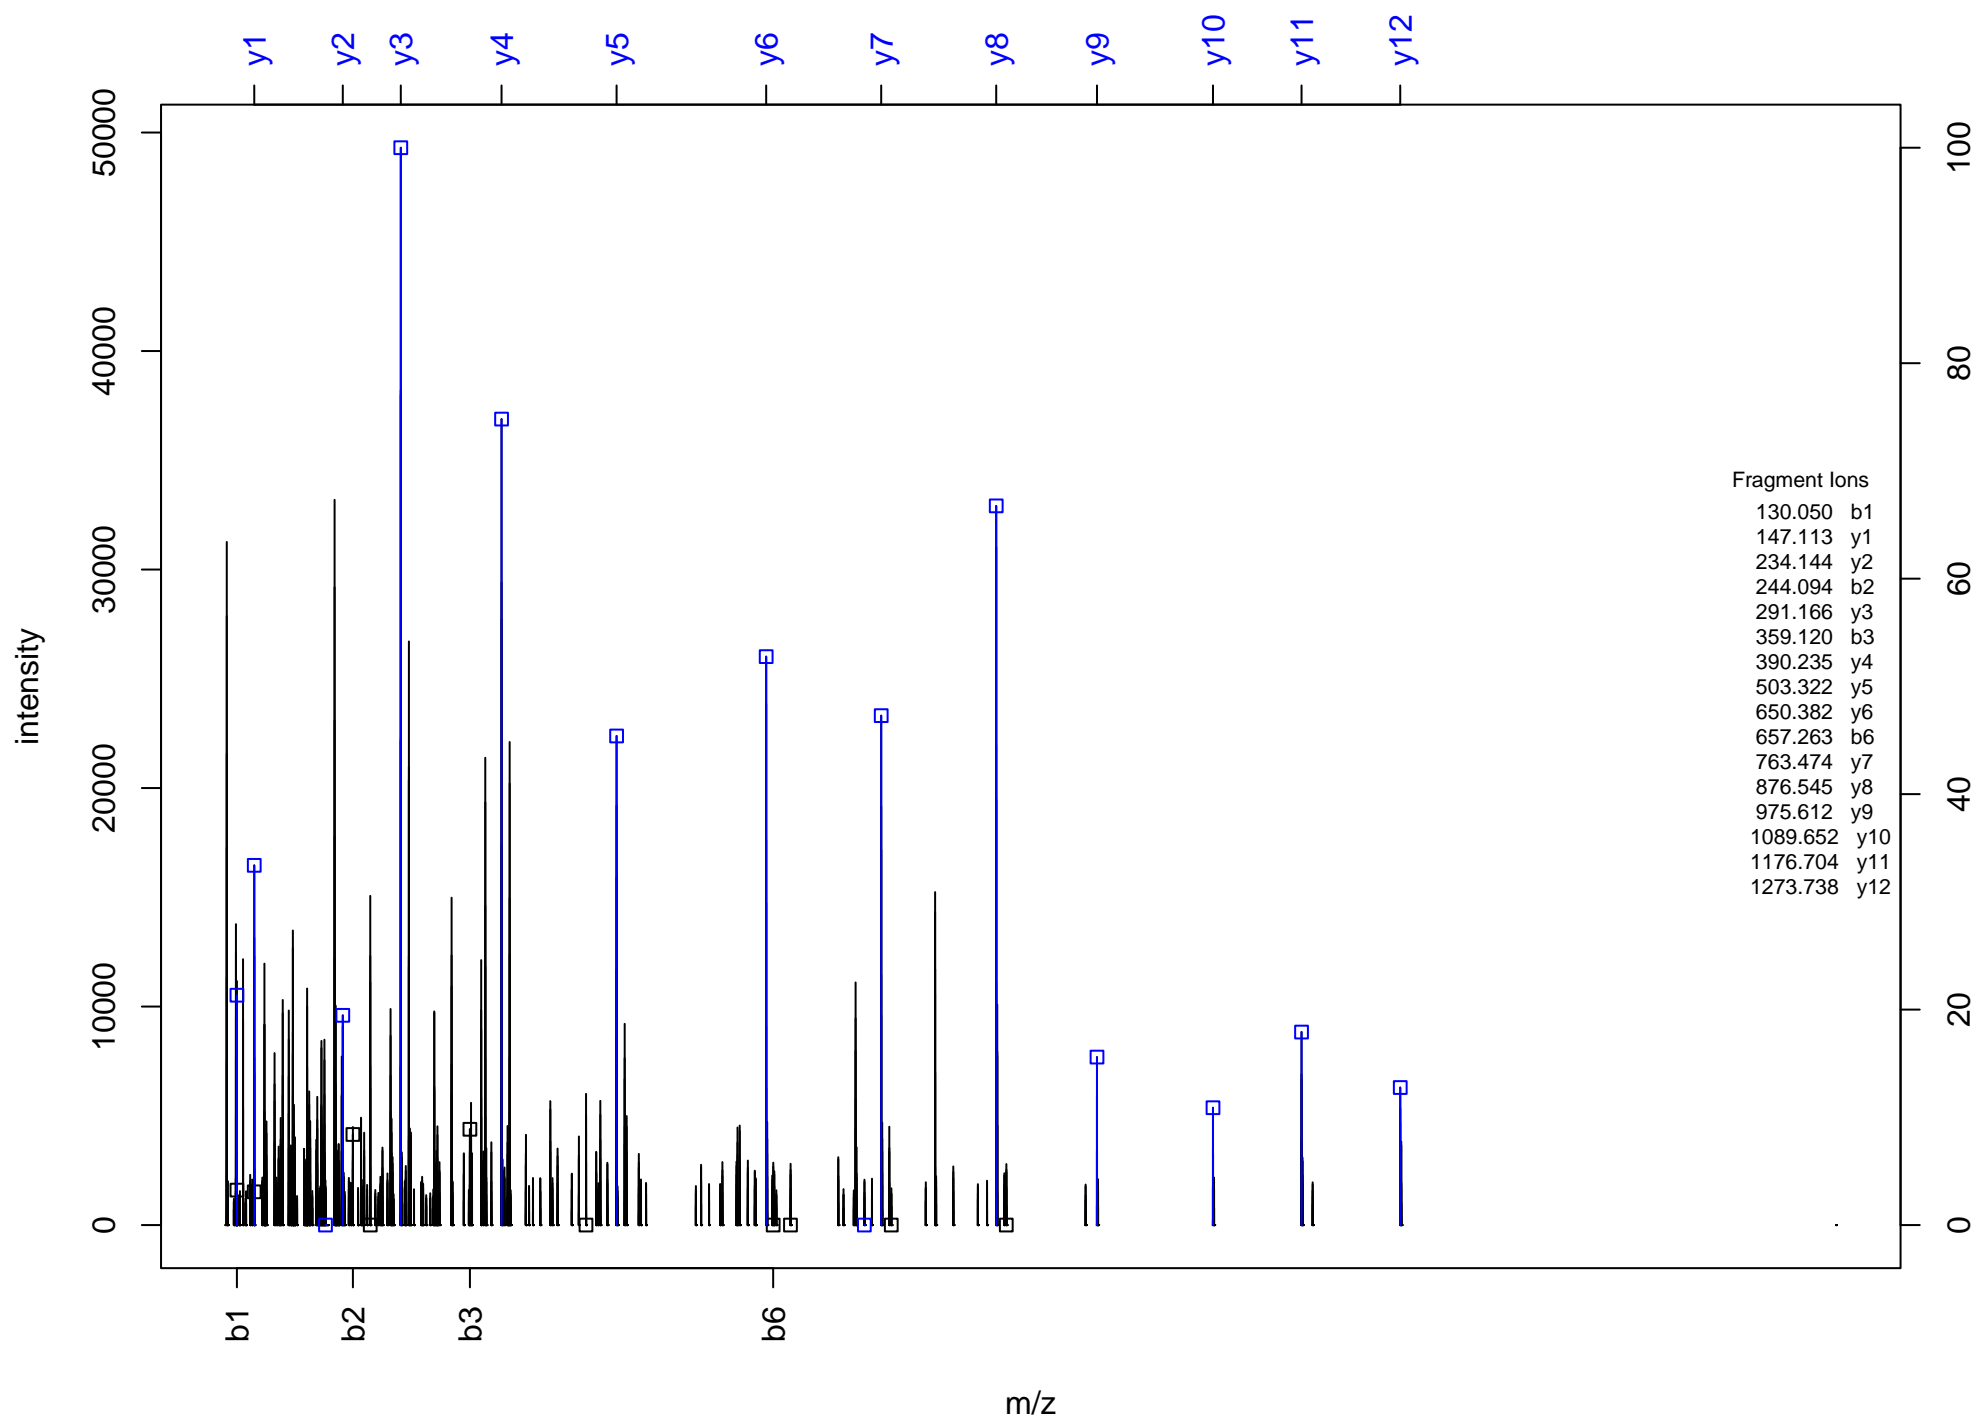

## Fragment Ions

|          |     |
|----------|-----|
| 130.050  | b1  |
| 147.113  | y1  |
| 234.144  | y2  |
| 244.094  | b2  |
| 291.166  | y3  |
| 359.120  | b3  |
| 390.235  | y4  |
| 503.322  | y5  |
| 650.382  | y6  |
| 657.263  | b6  |
| 763.474  | y7  |
| 876.545  | y8  |
| 975.612  | y9  |
| 1089.652 | y10 |
| 1176.704 | y11 |
| 1273.738 | y12 |

# SFKELHQ<sup>+</sup>IQ<sup>+</sup>ETERN<sup>+</sup>K

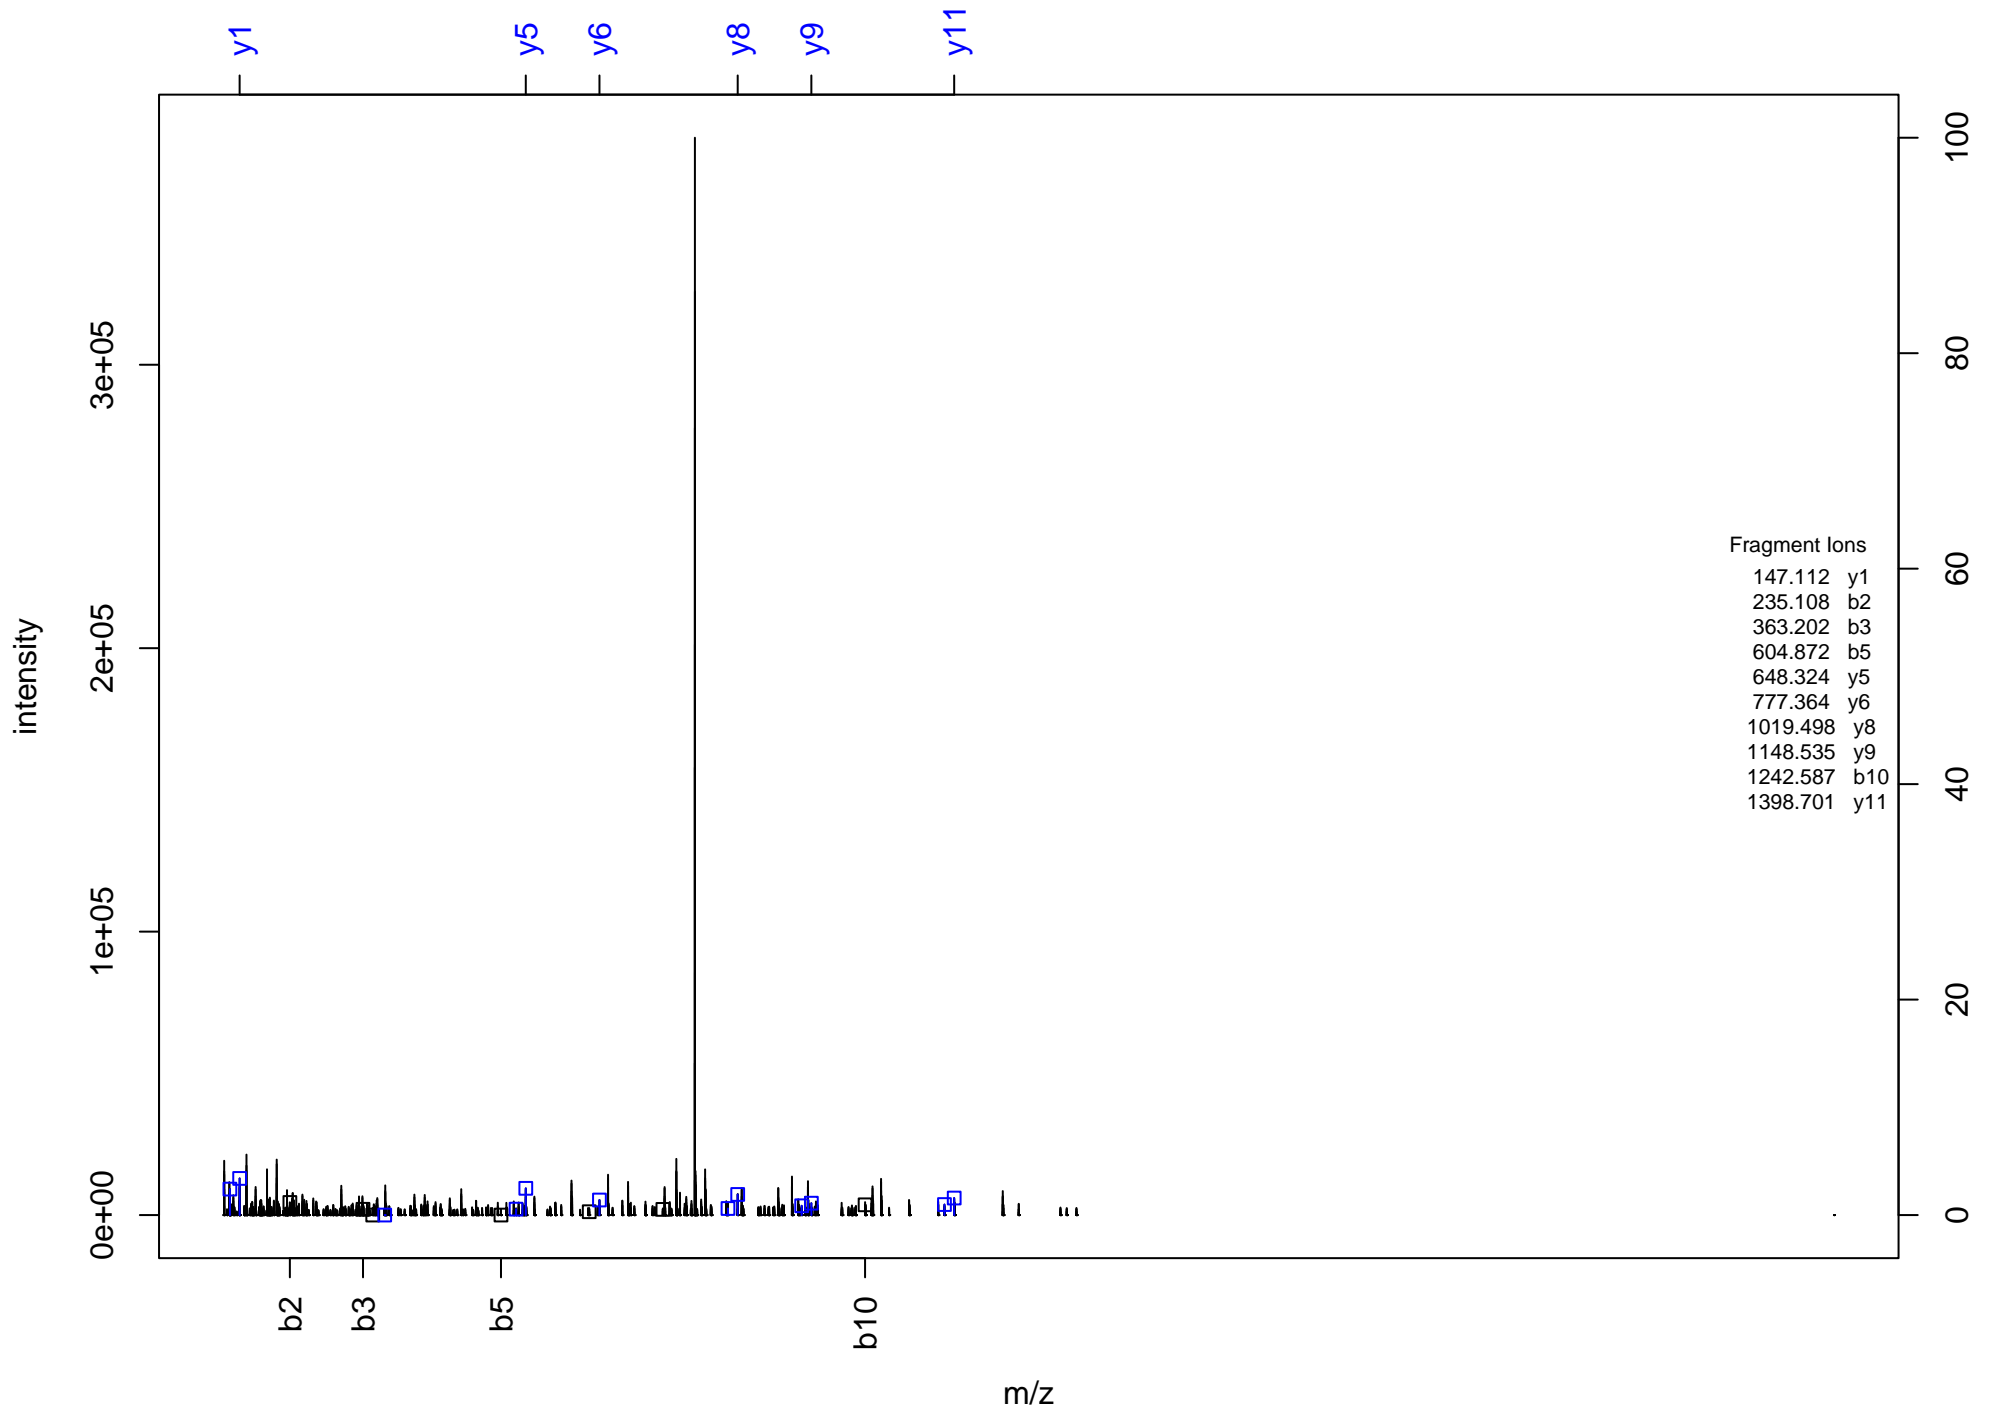

# RPAGPEPQPPAAGSDGAAEDADEELADGEDRDPEAEEPLWASR

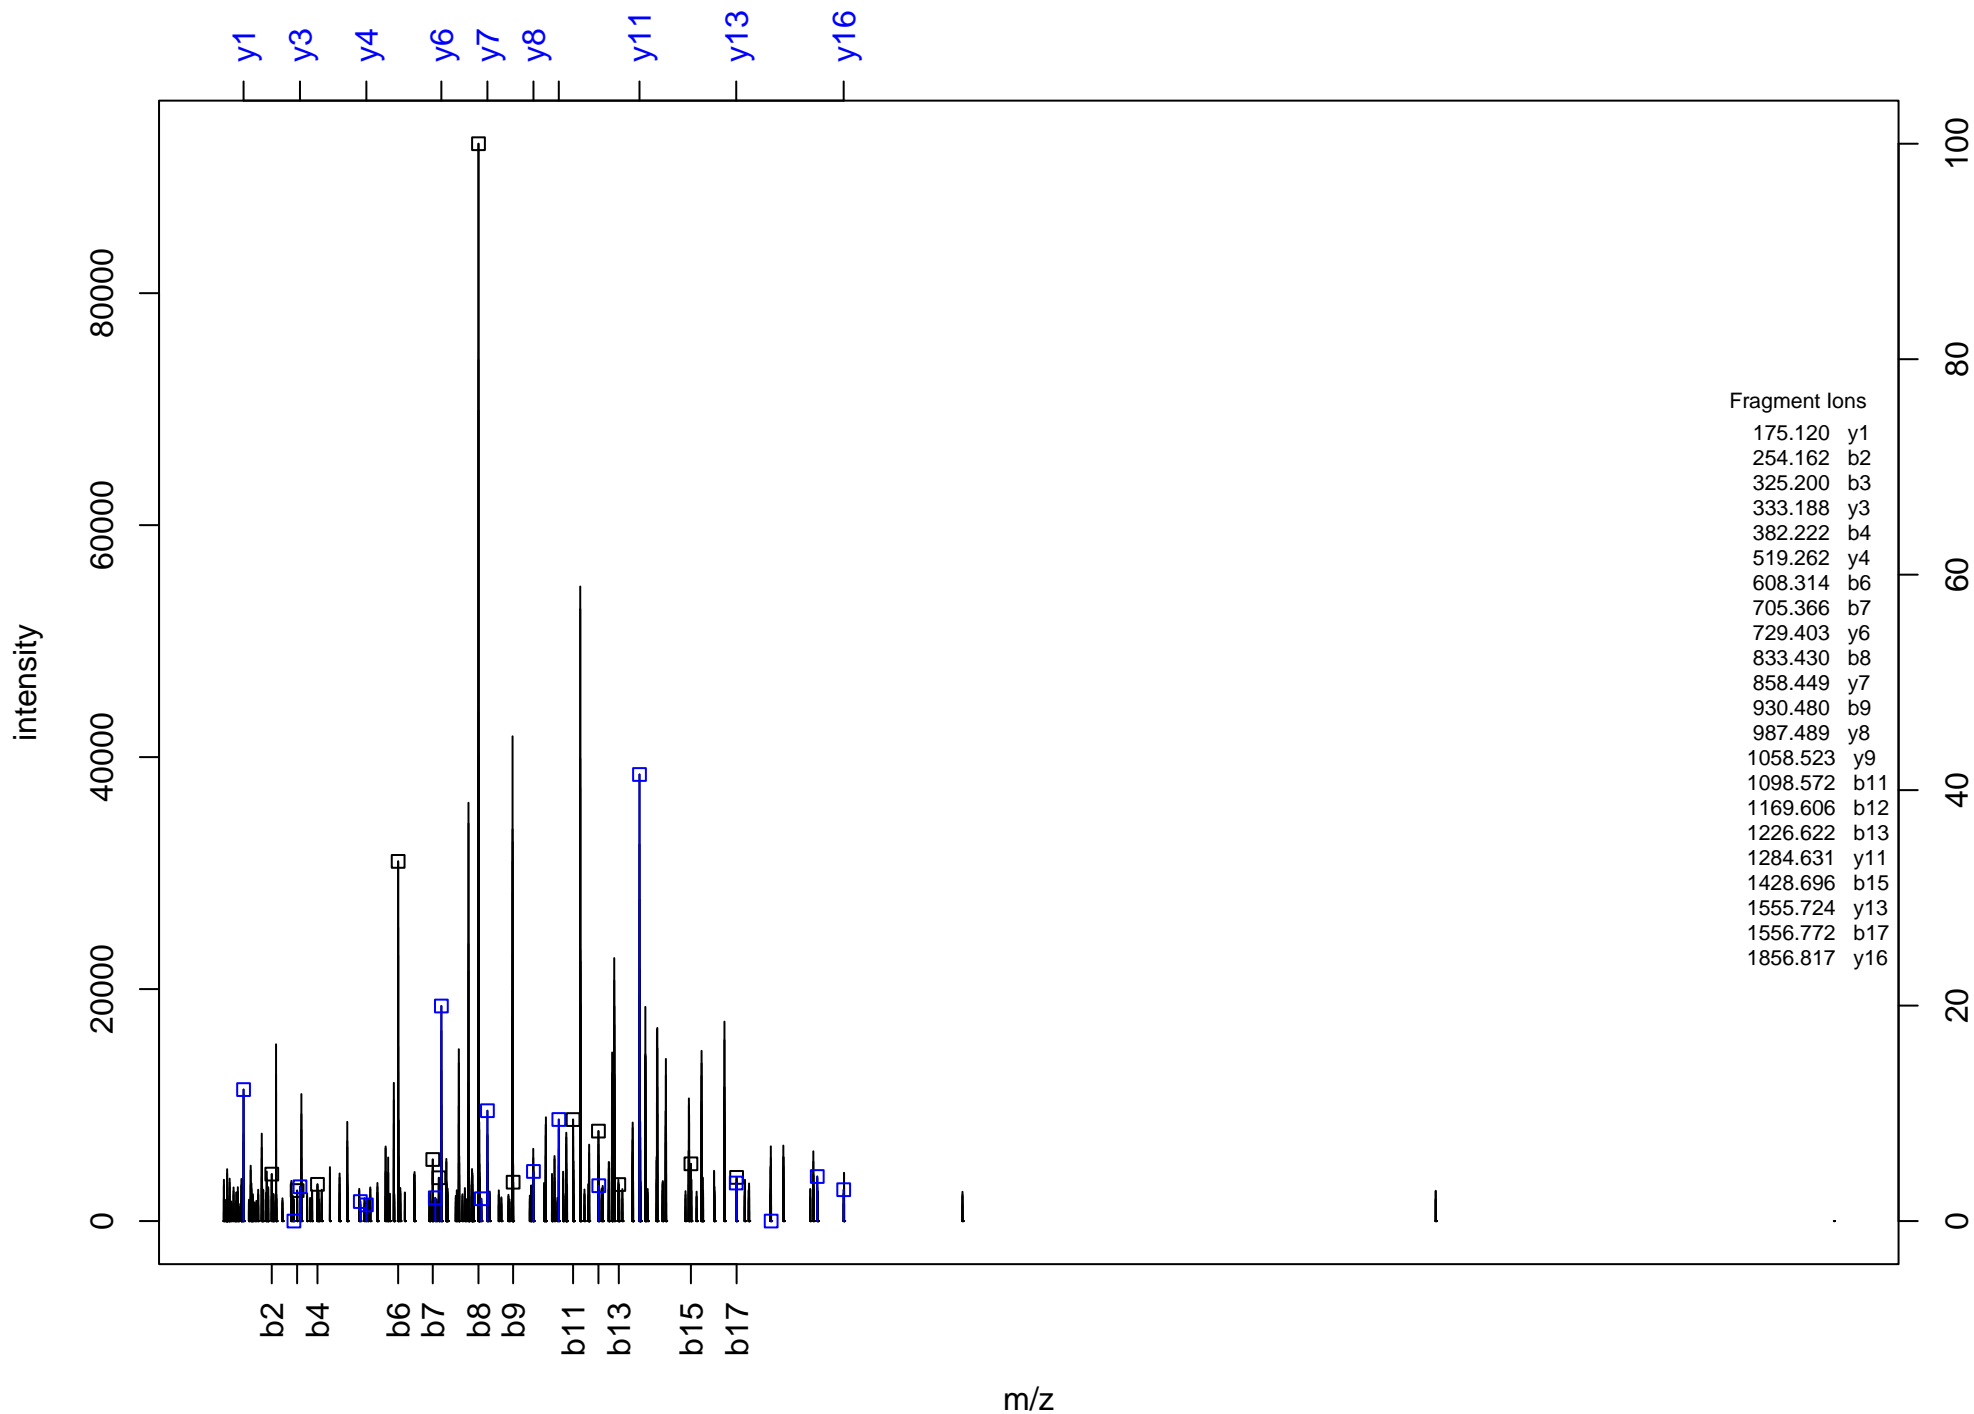

# DVTRPTITTSDEPDTLYK

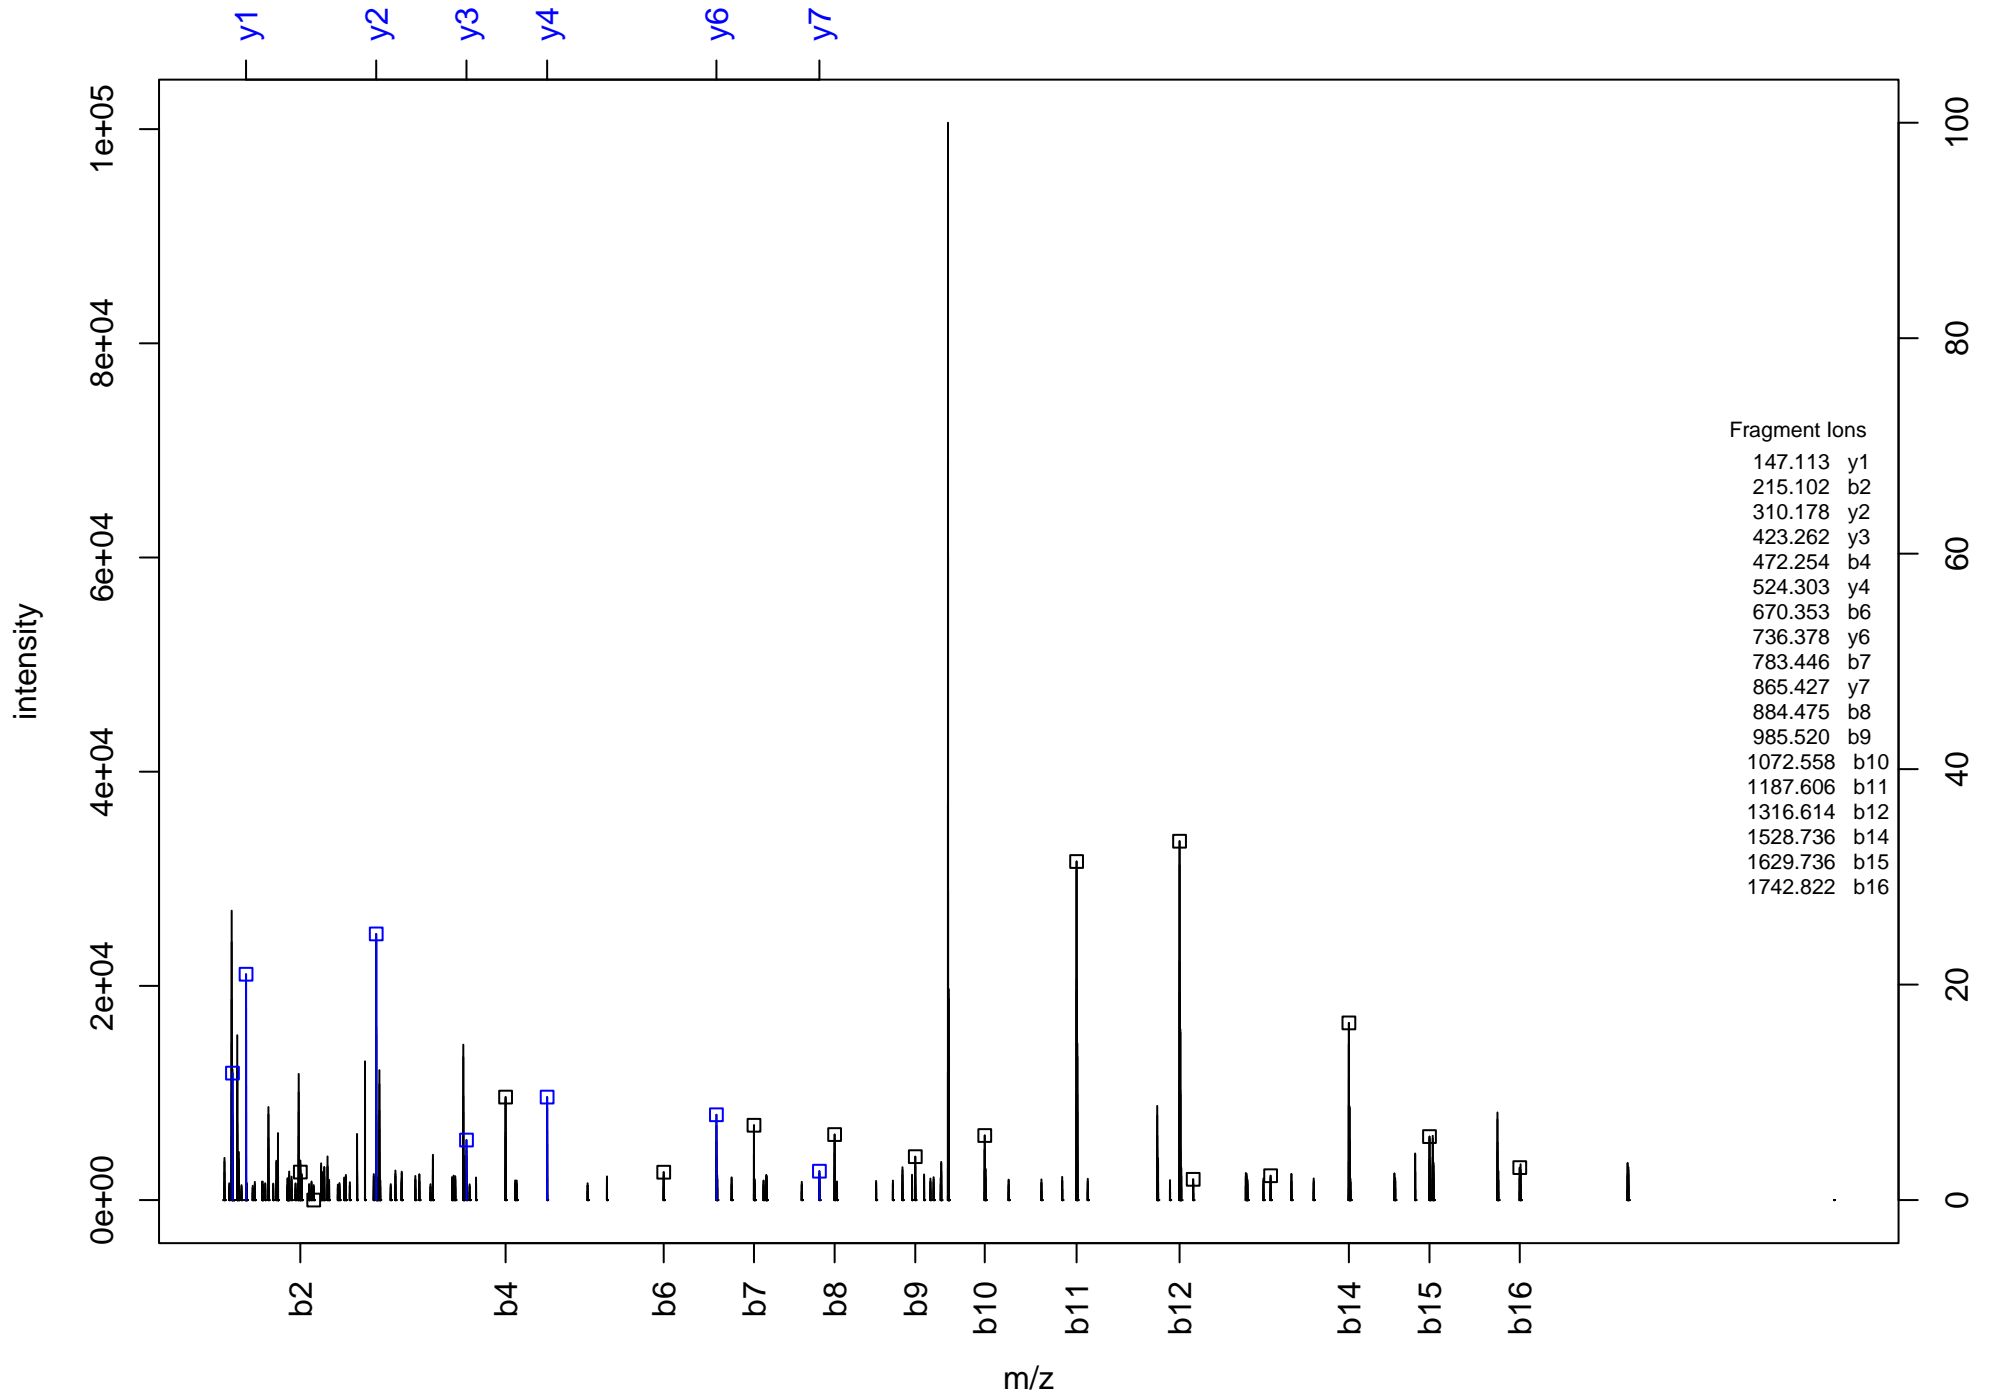

# AVAIETQPAQGESDAVAR

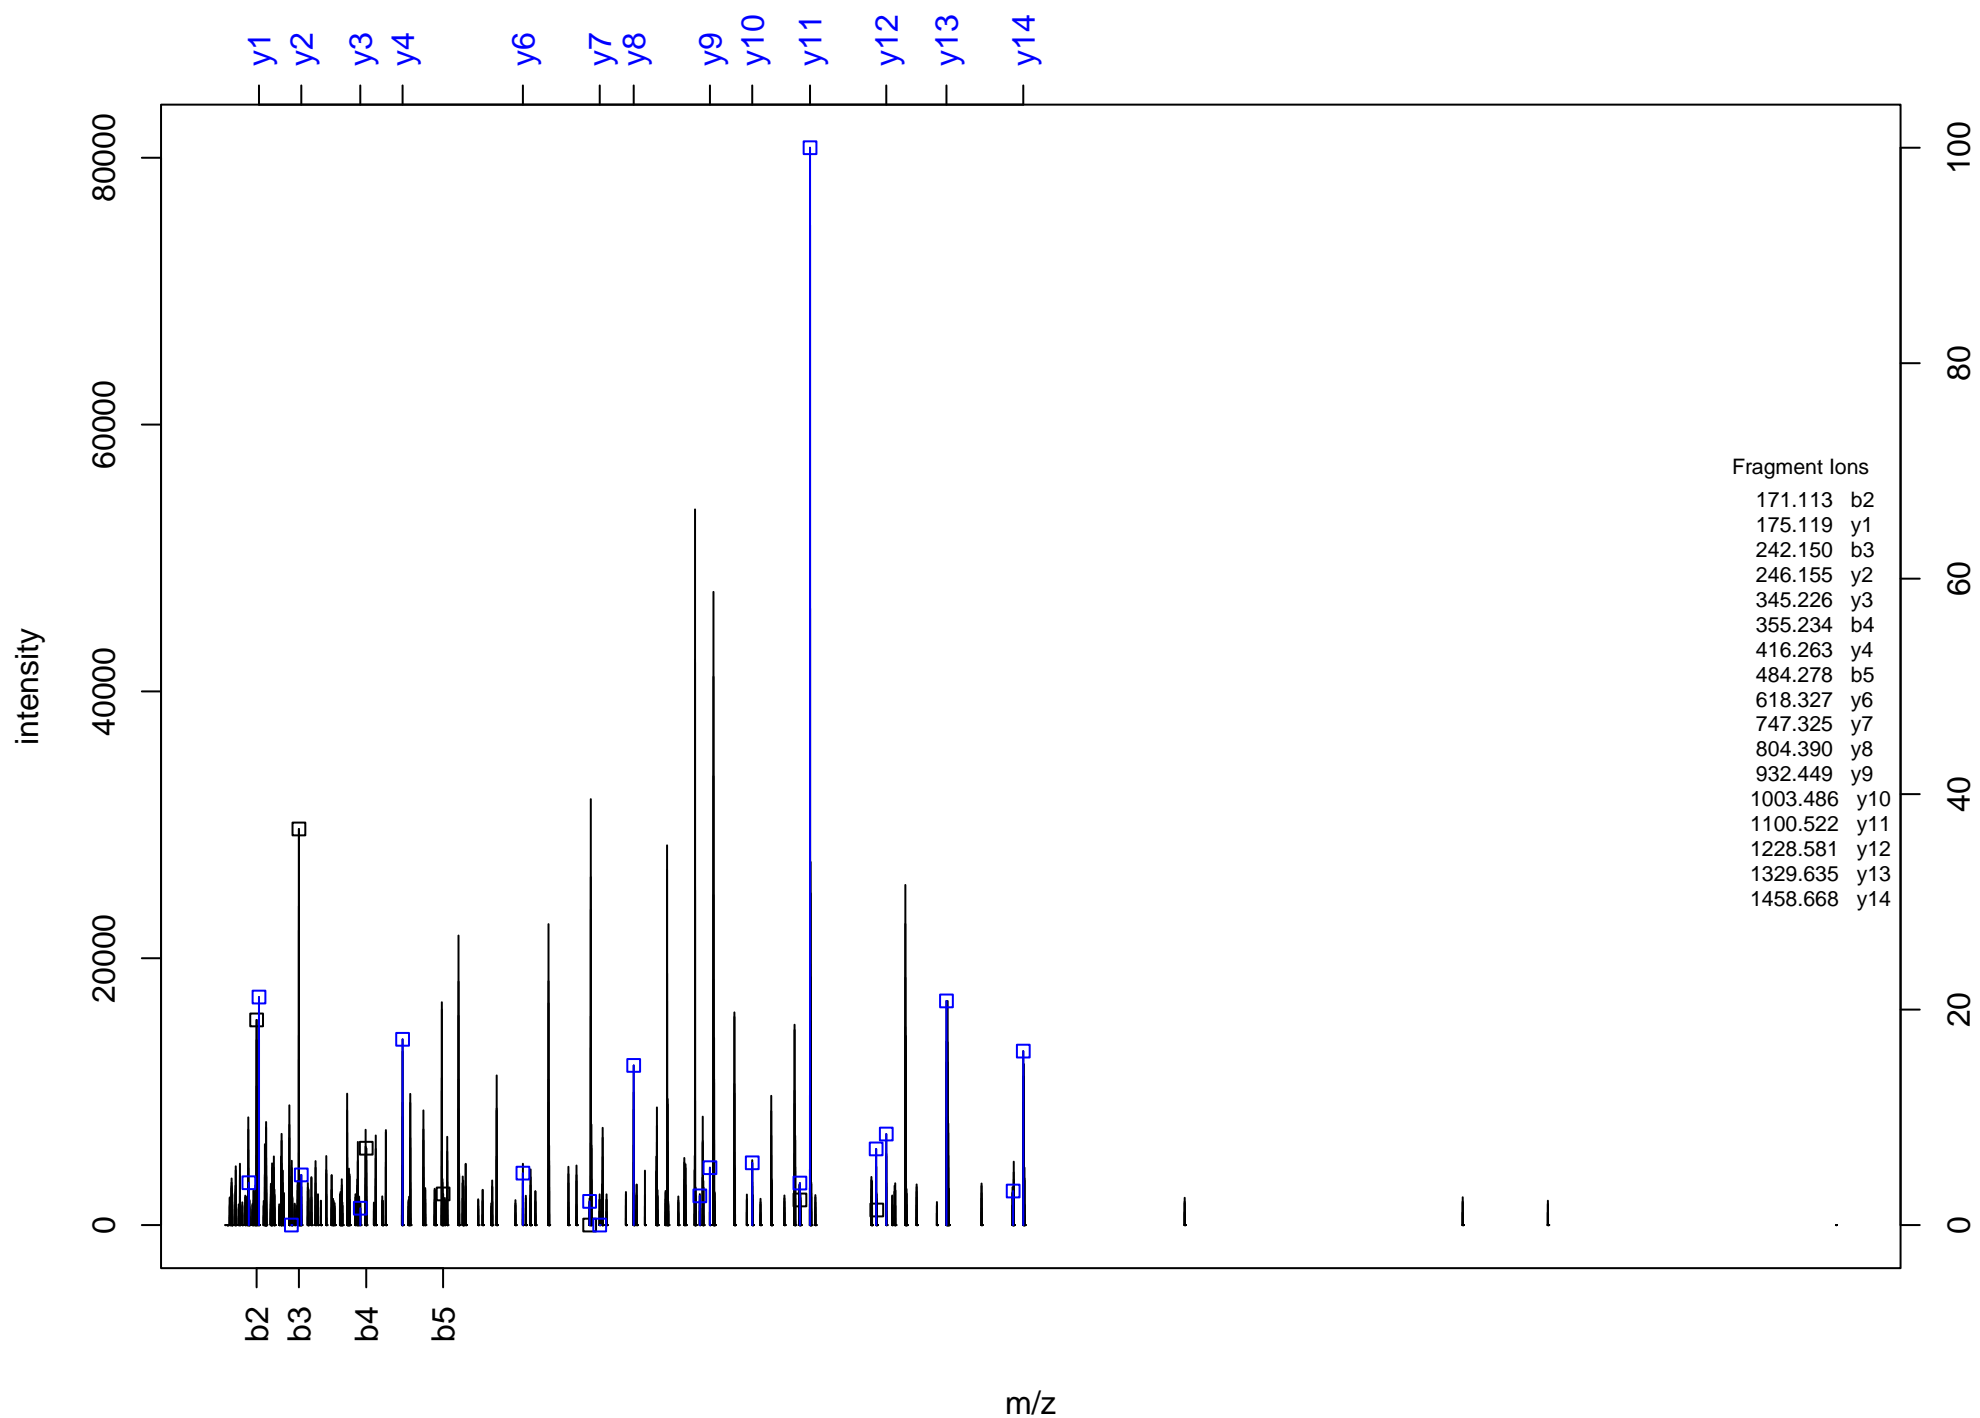

# (Ac)AAETQTLNFGPEWLR

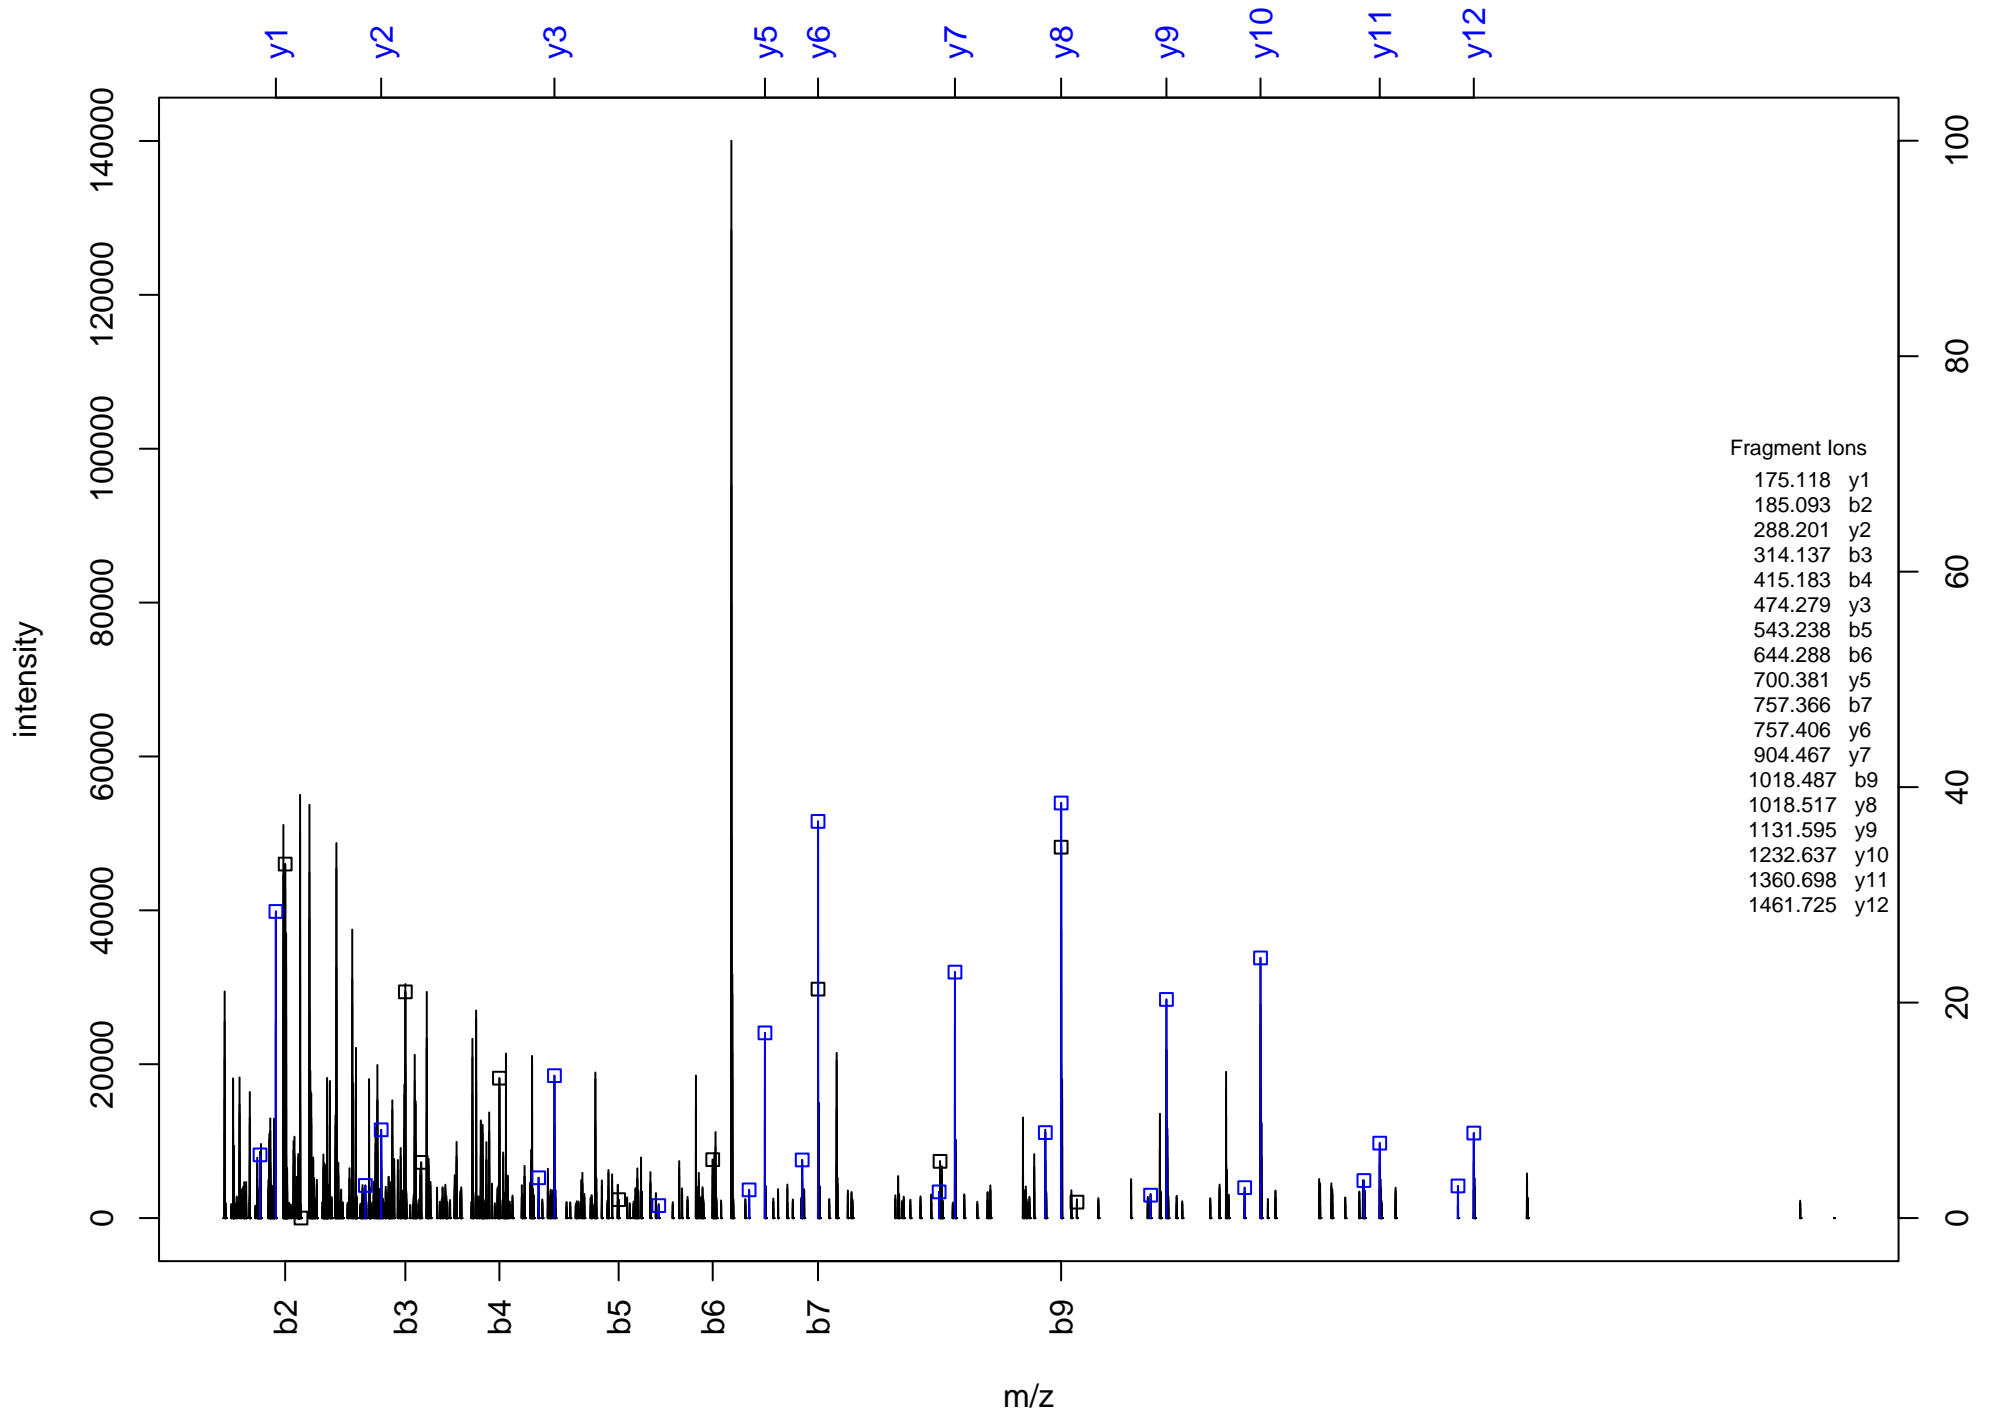

M\*LN^\*KM\*TLHPQ^Q^

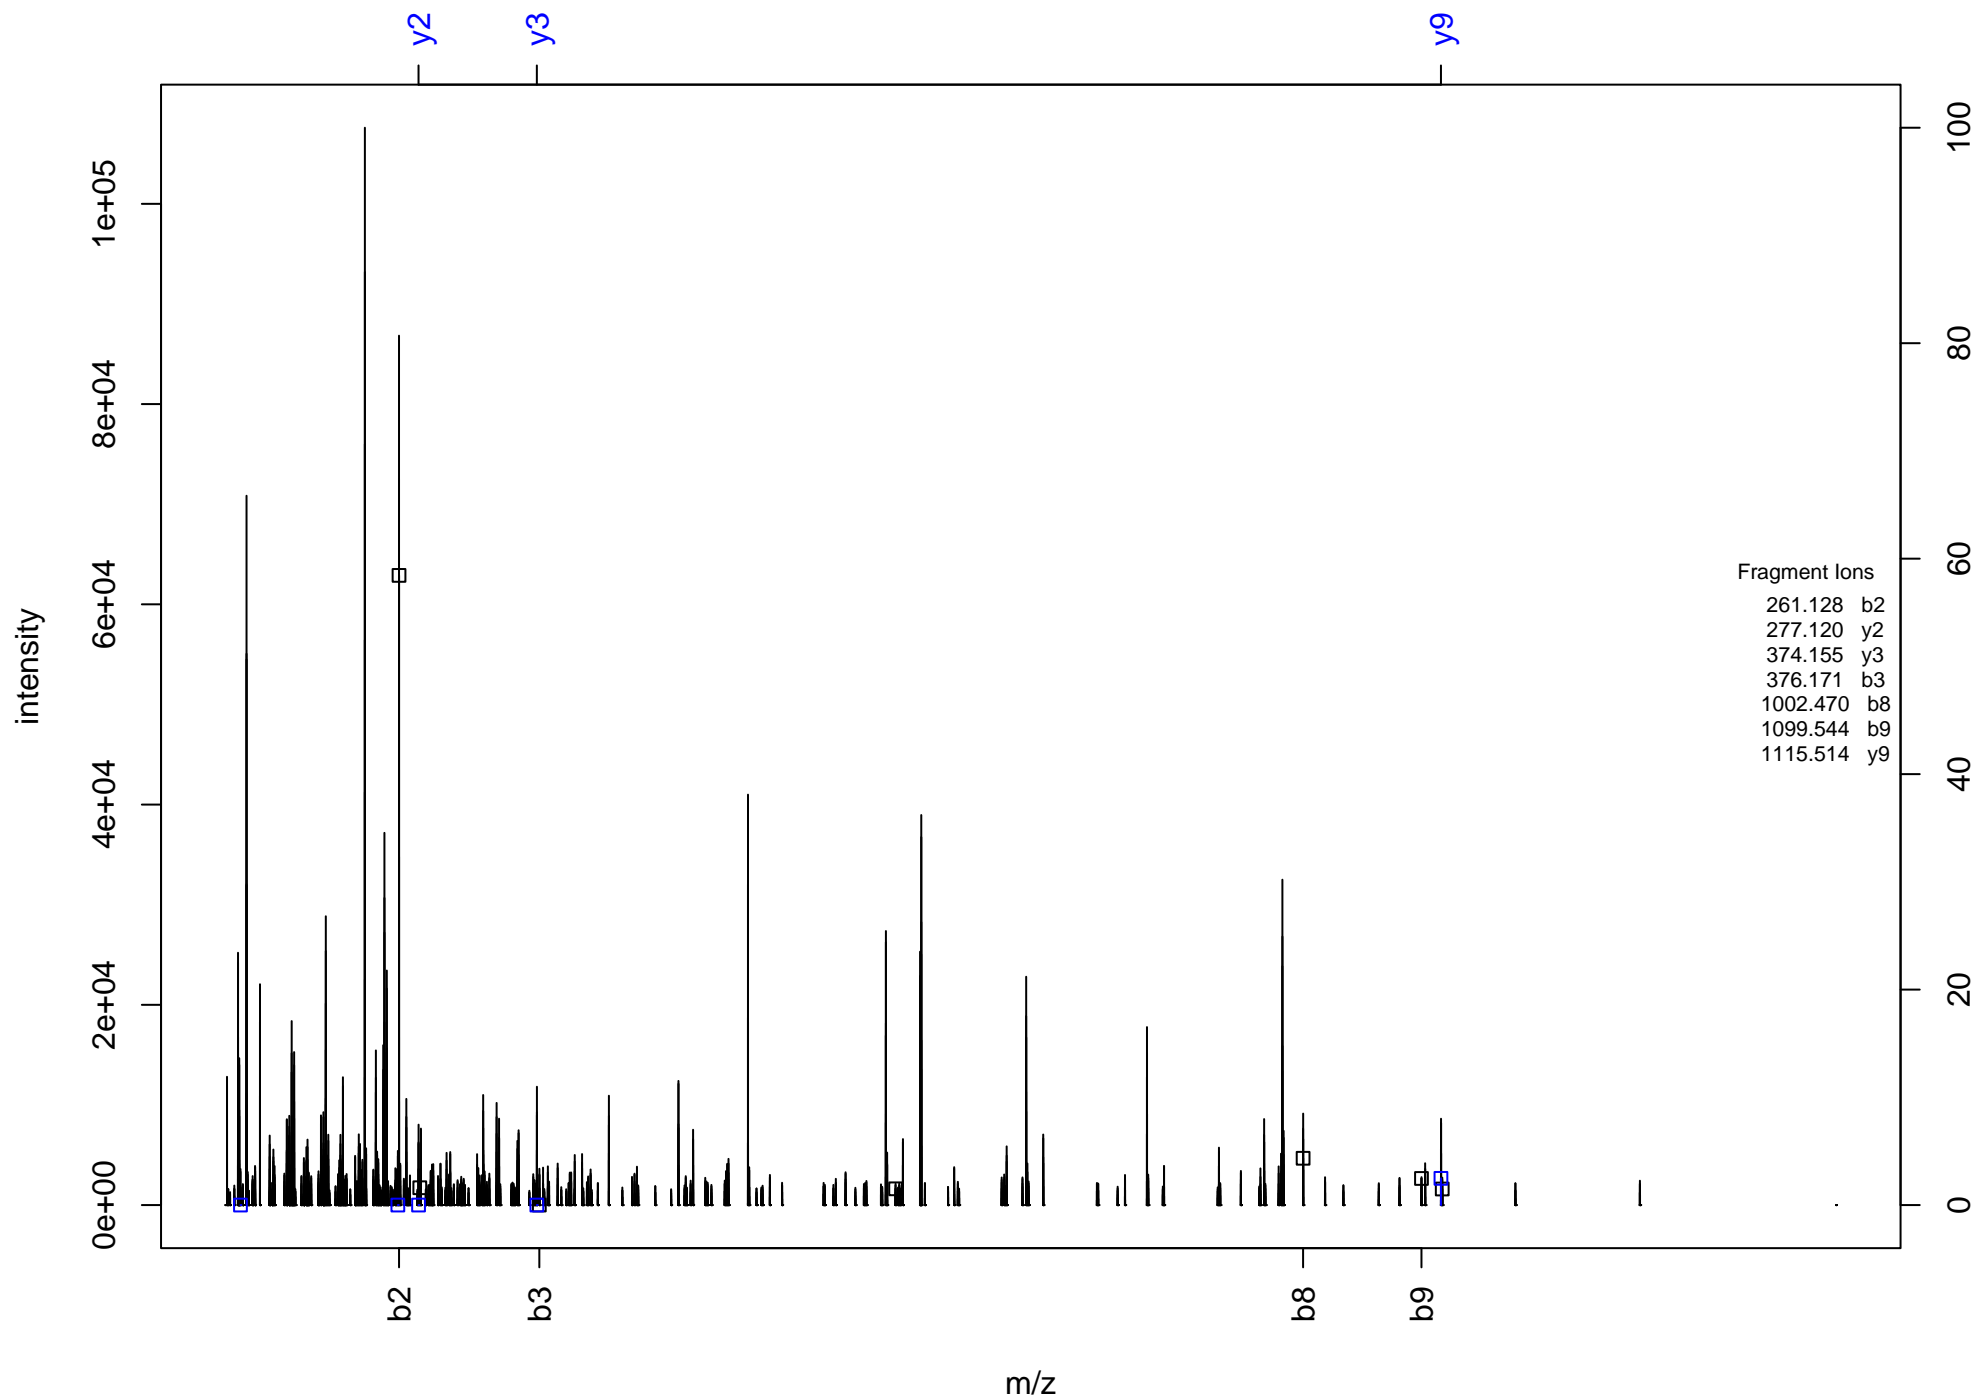

# TLDPSIDGMESLEDLDK

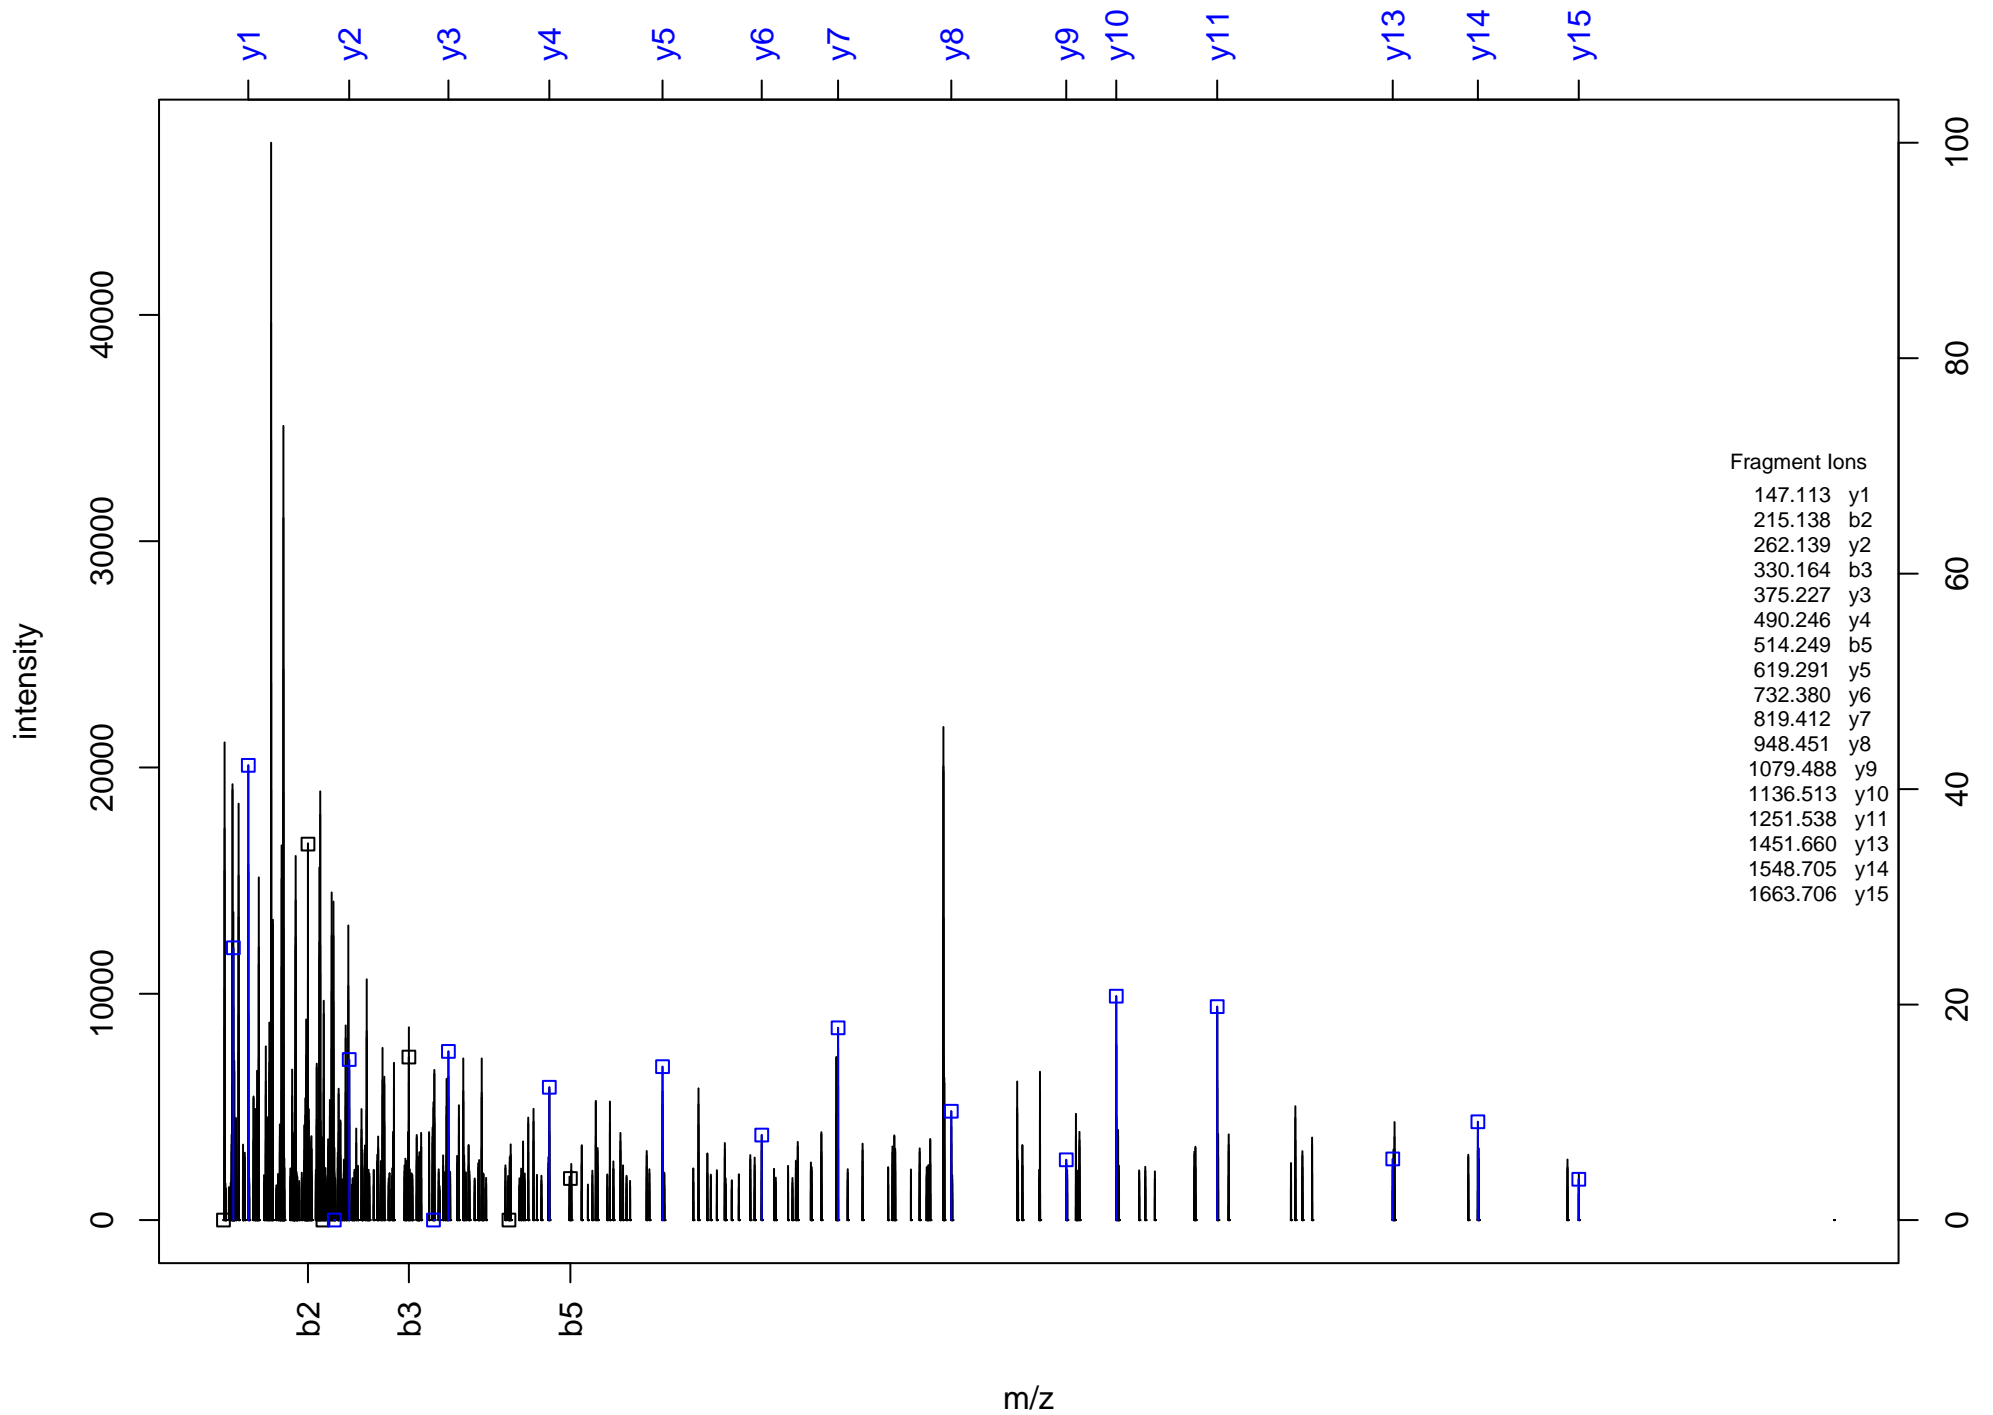



# DDFSEFDNLR

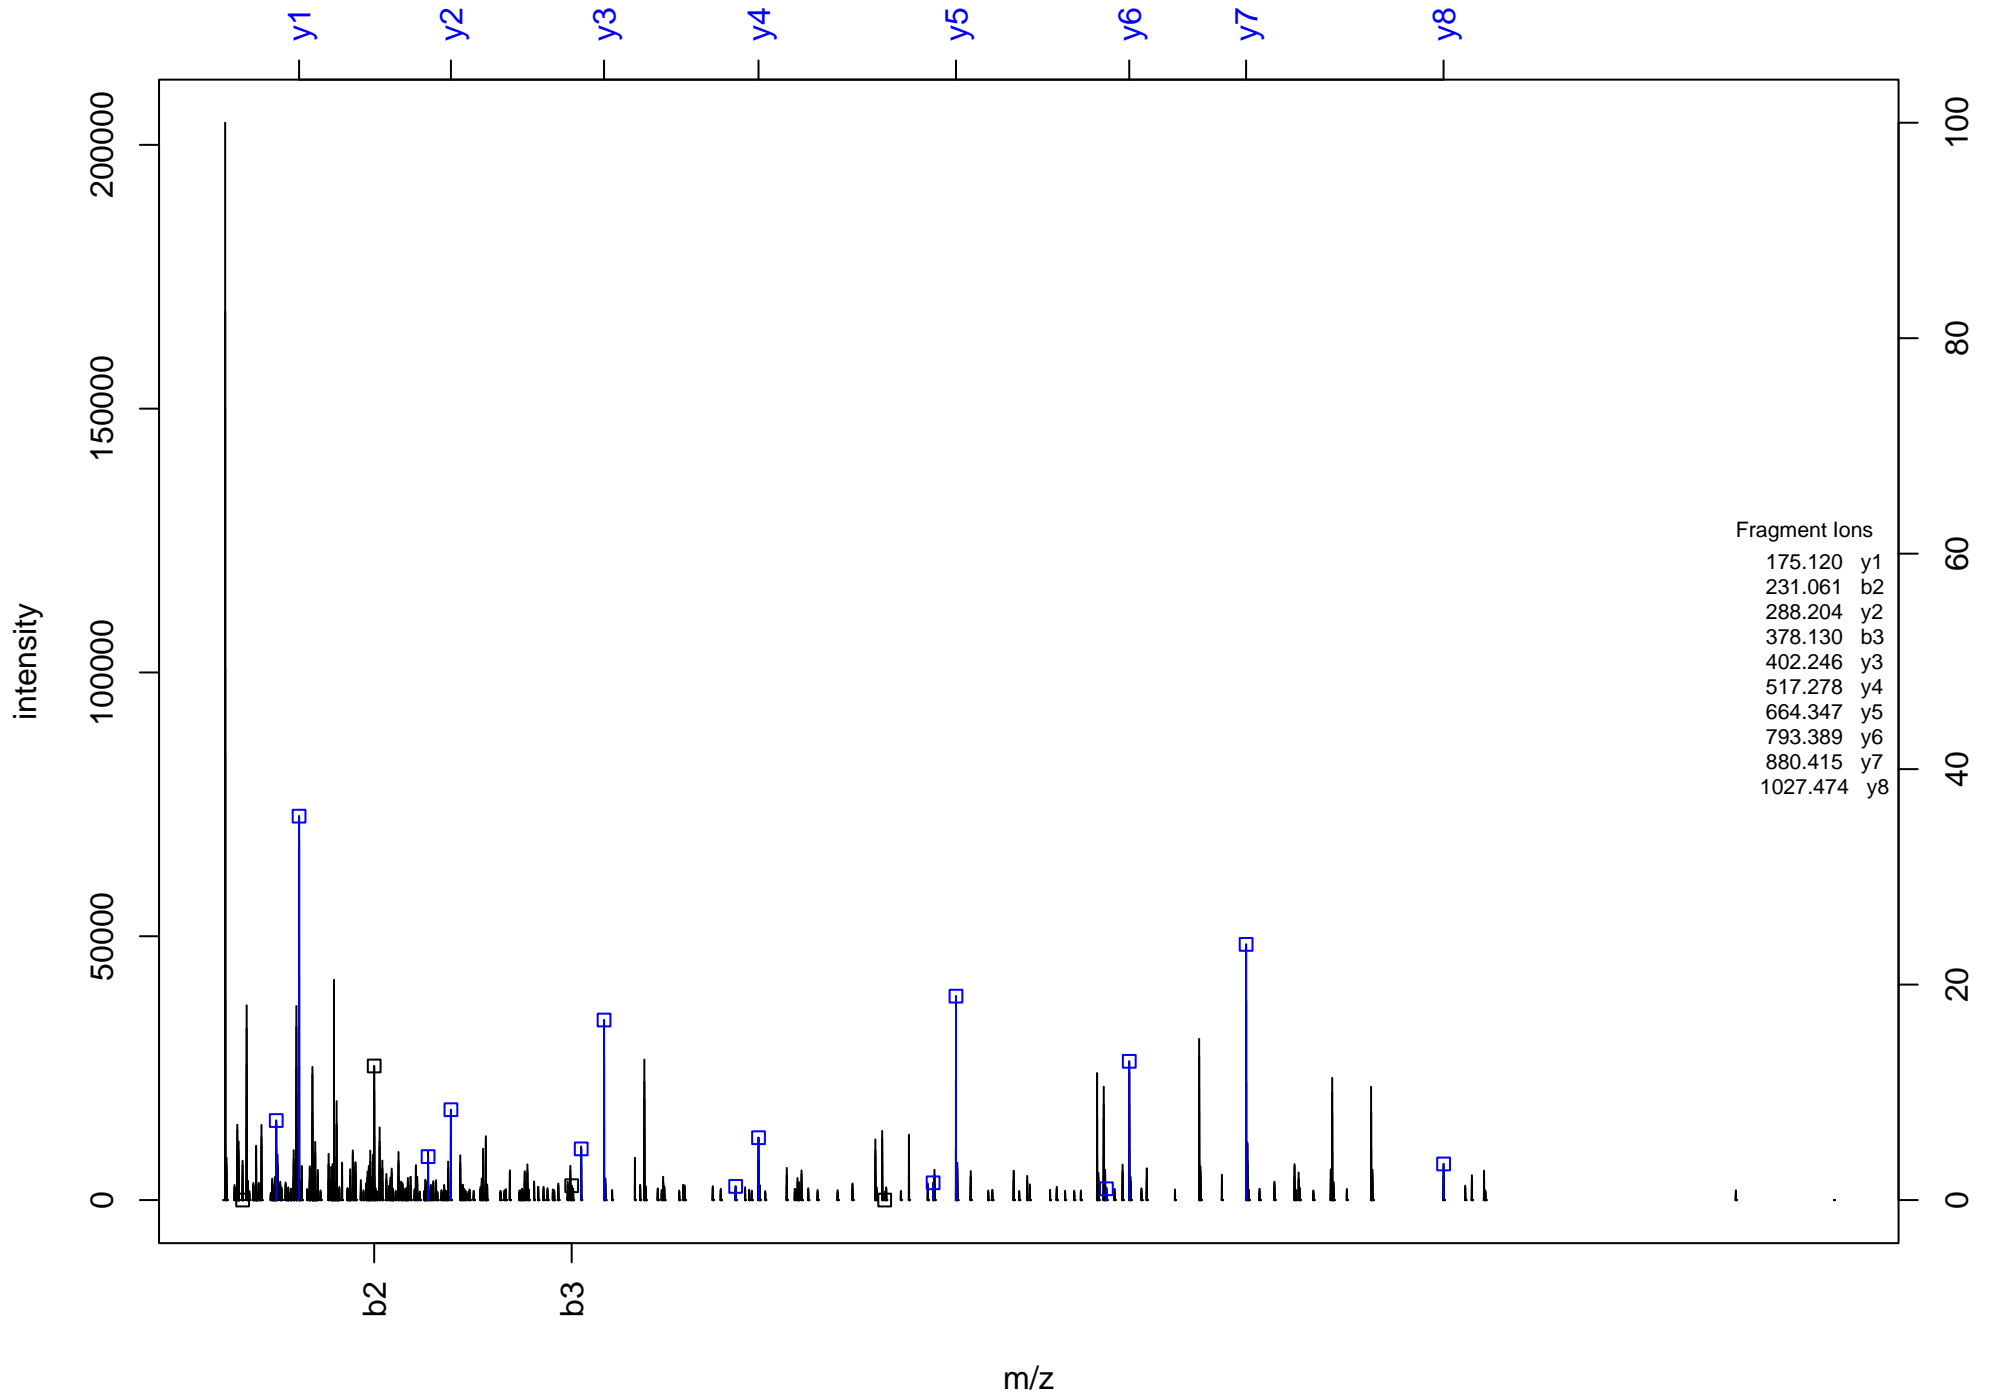

# EN^EMDEN^LEQVSGIIGNLR

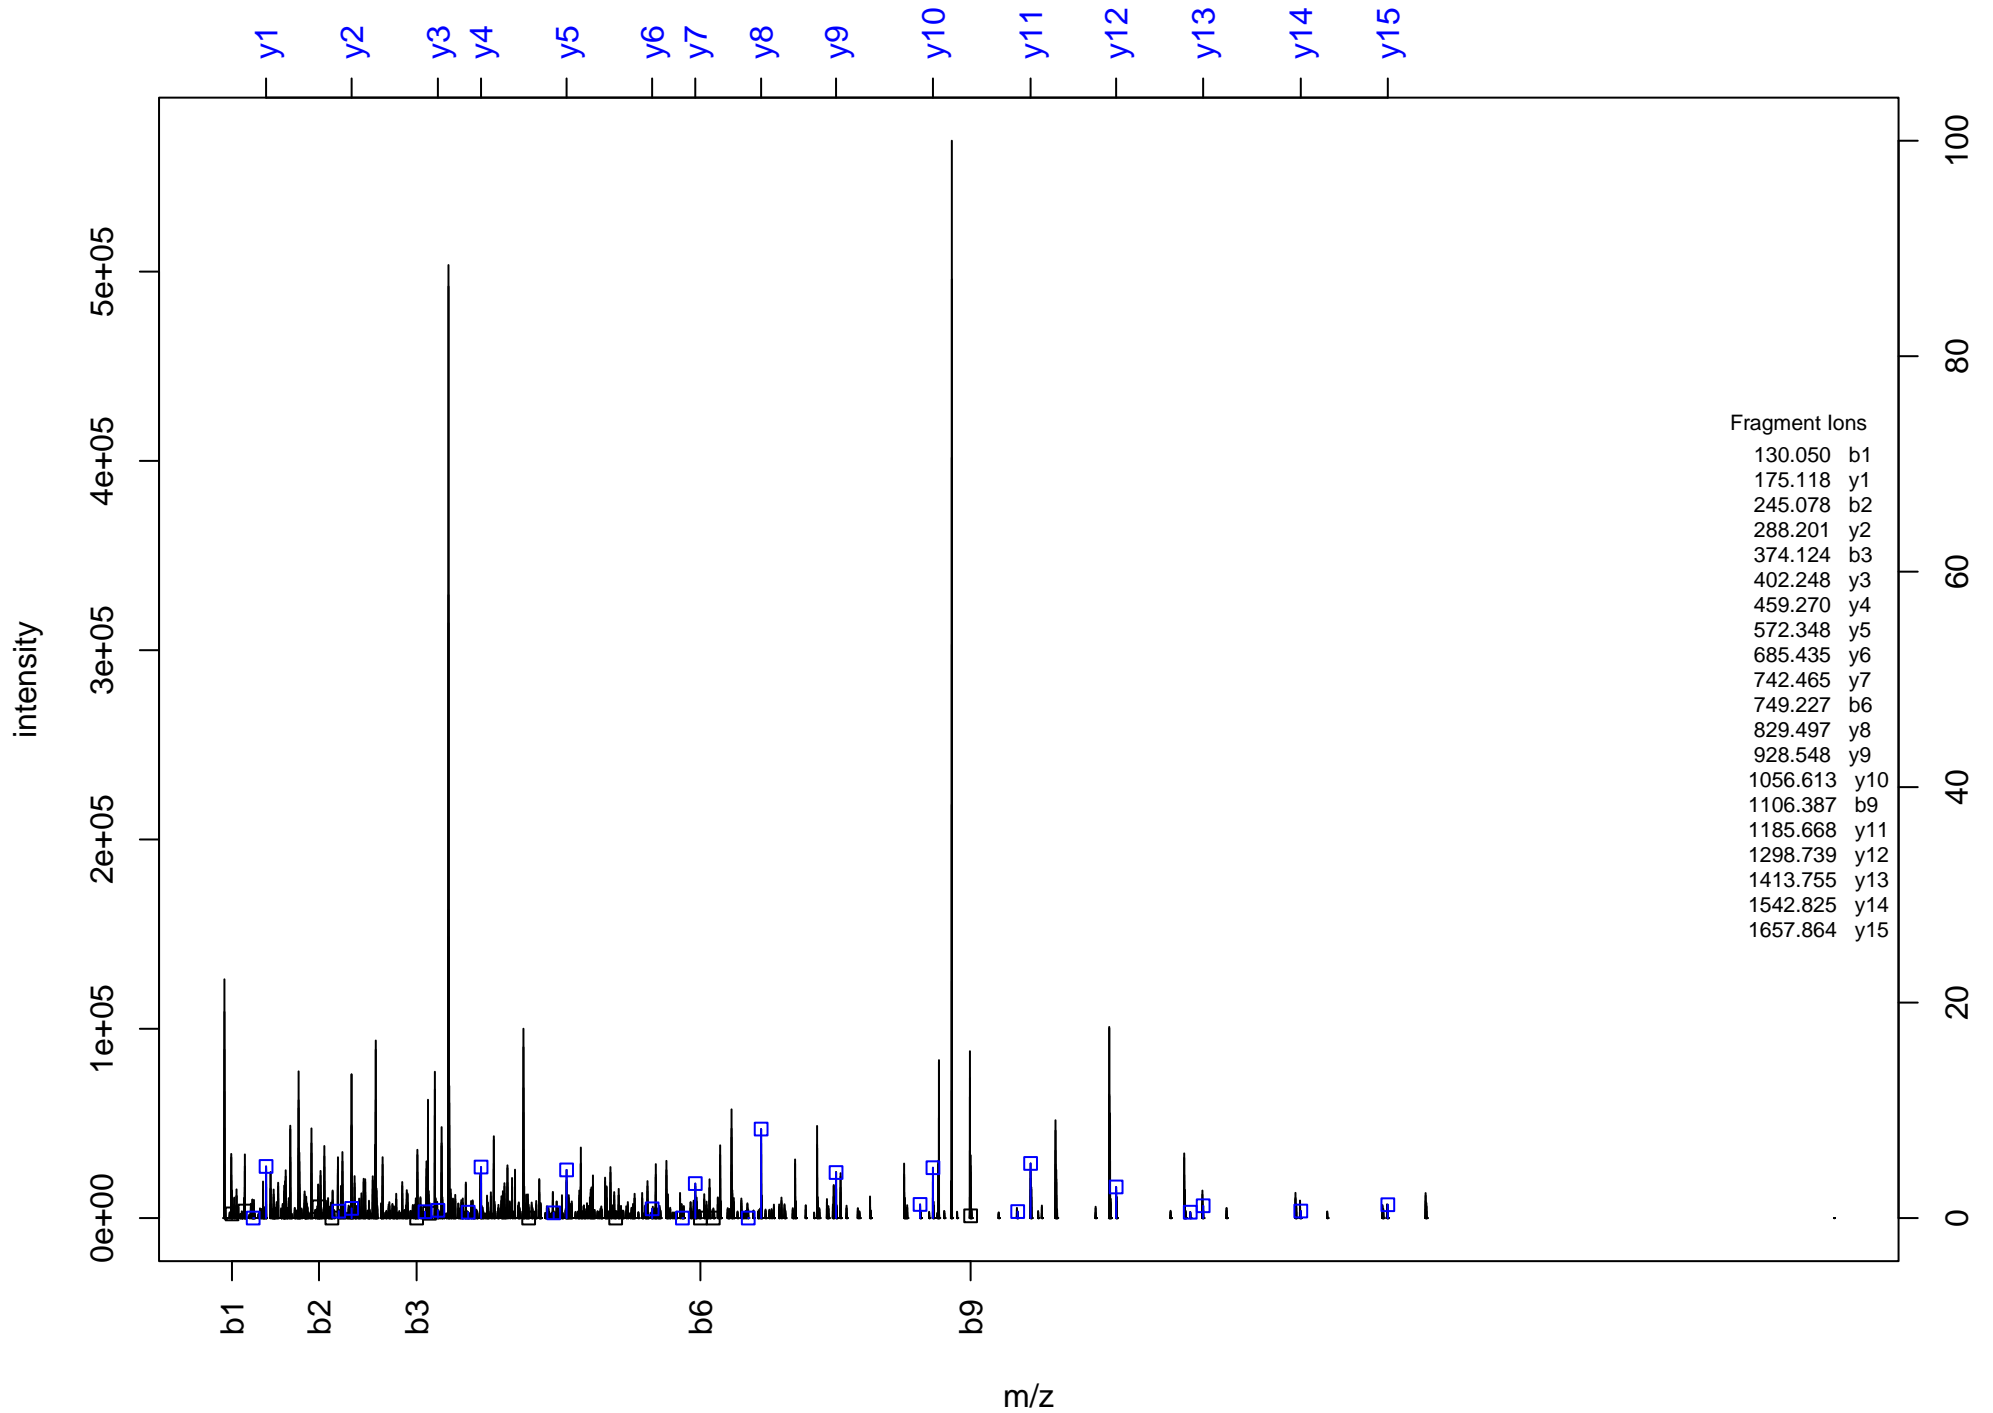

# GVEEEEEDGEMRE

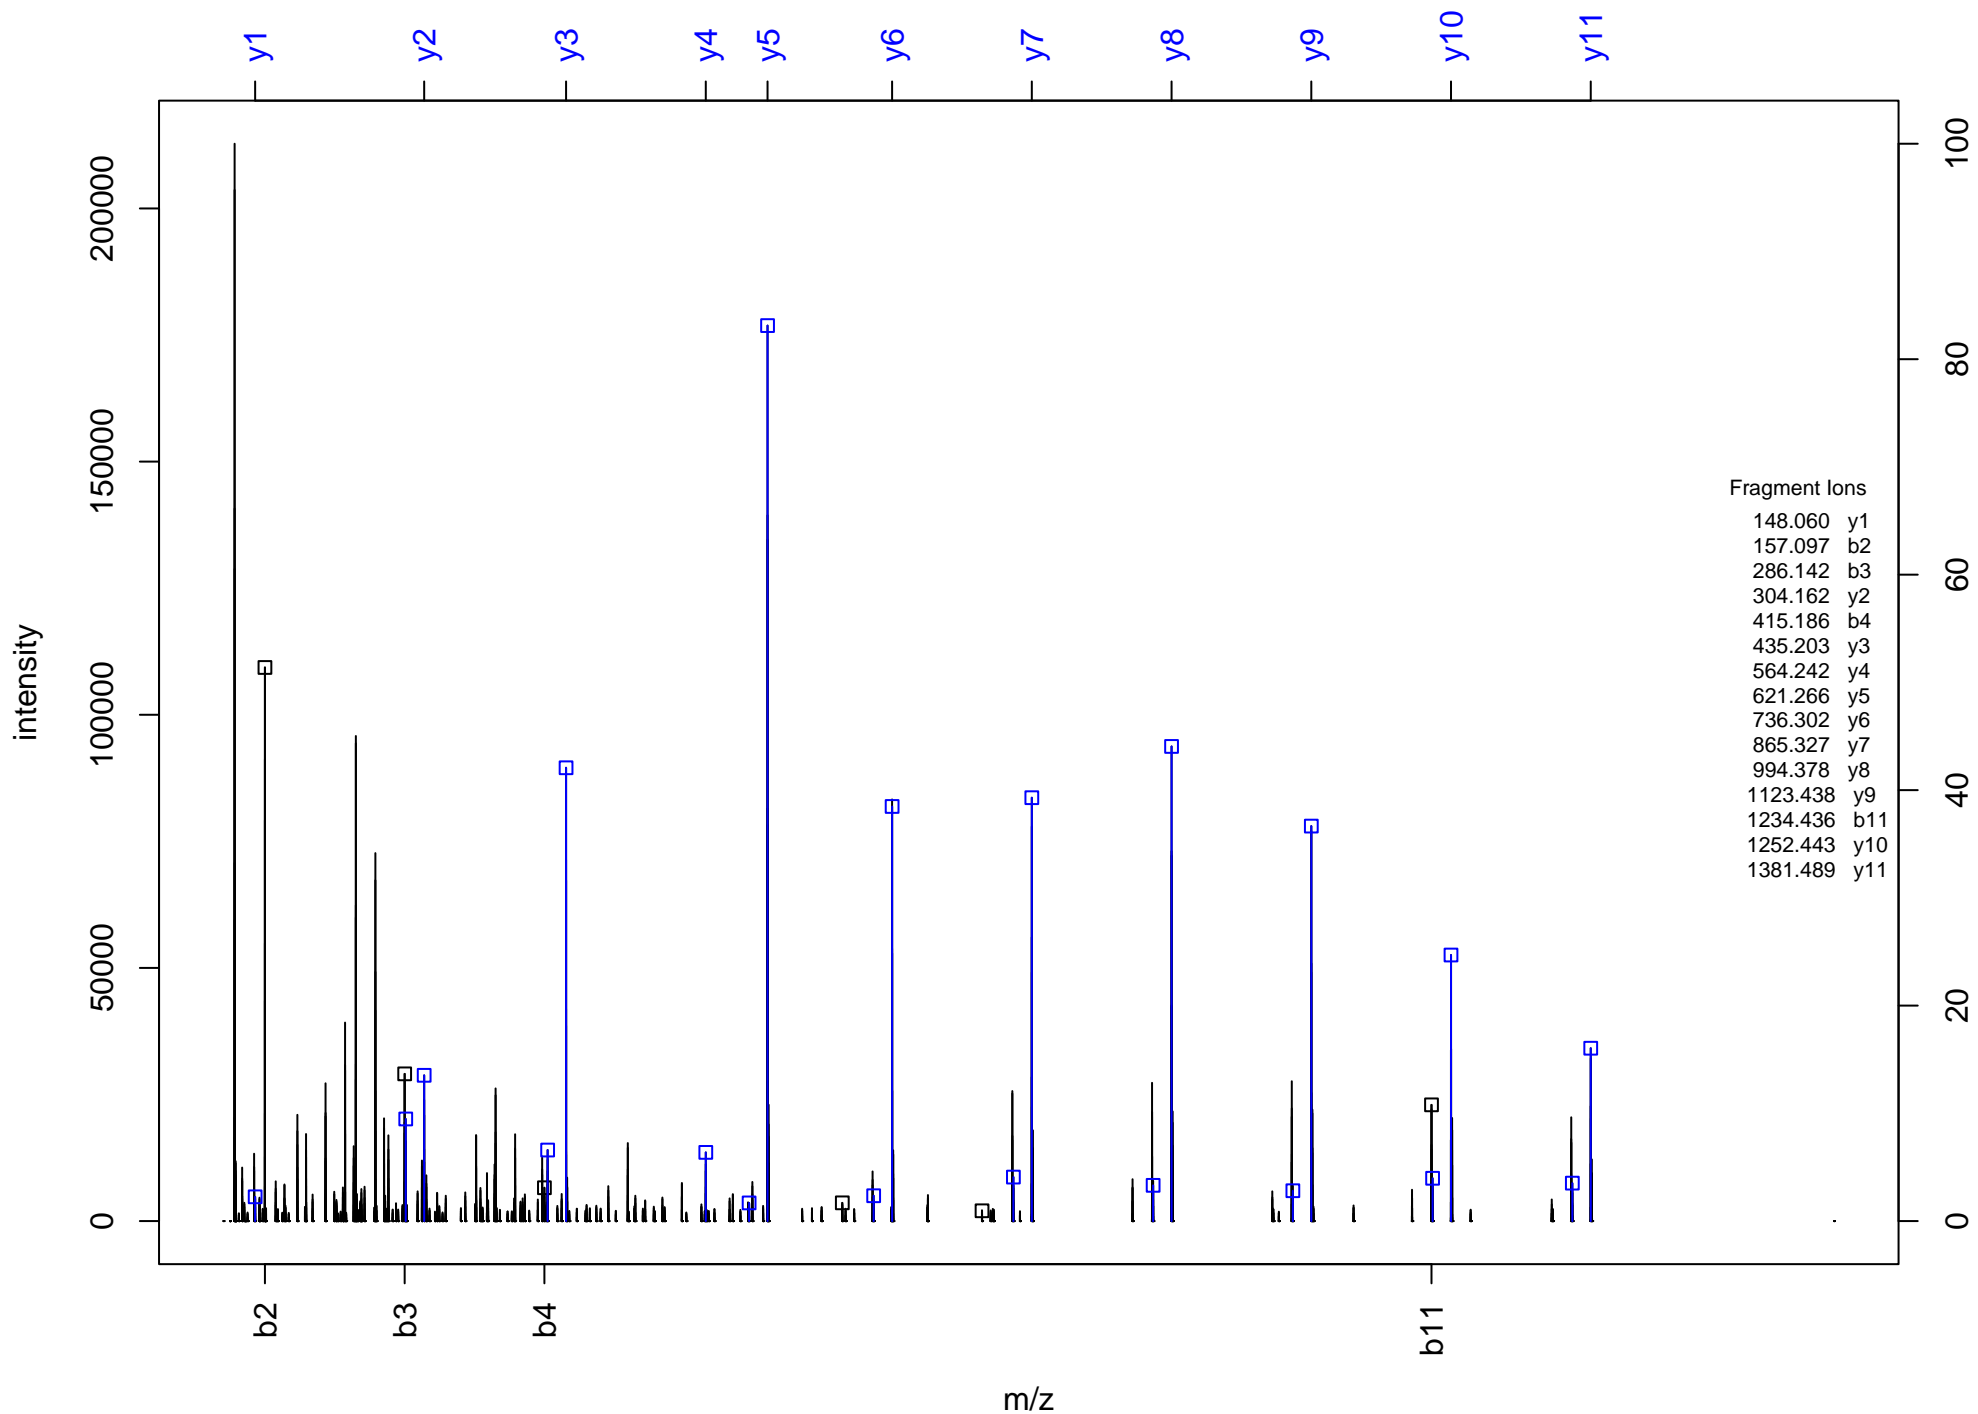

# YLLQHQPVQLTSLLDQYVK

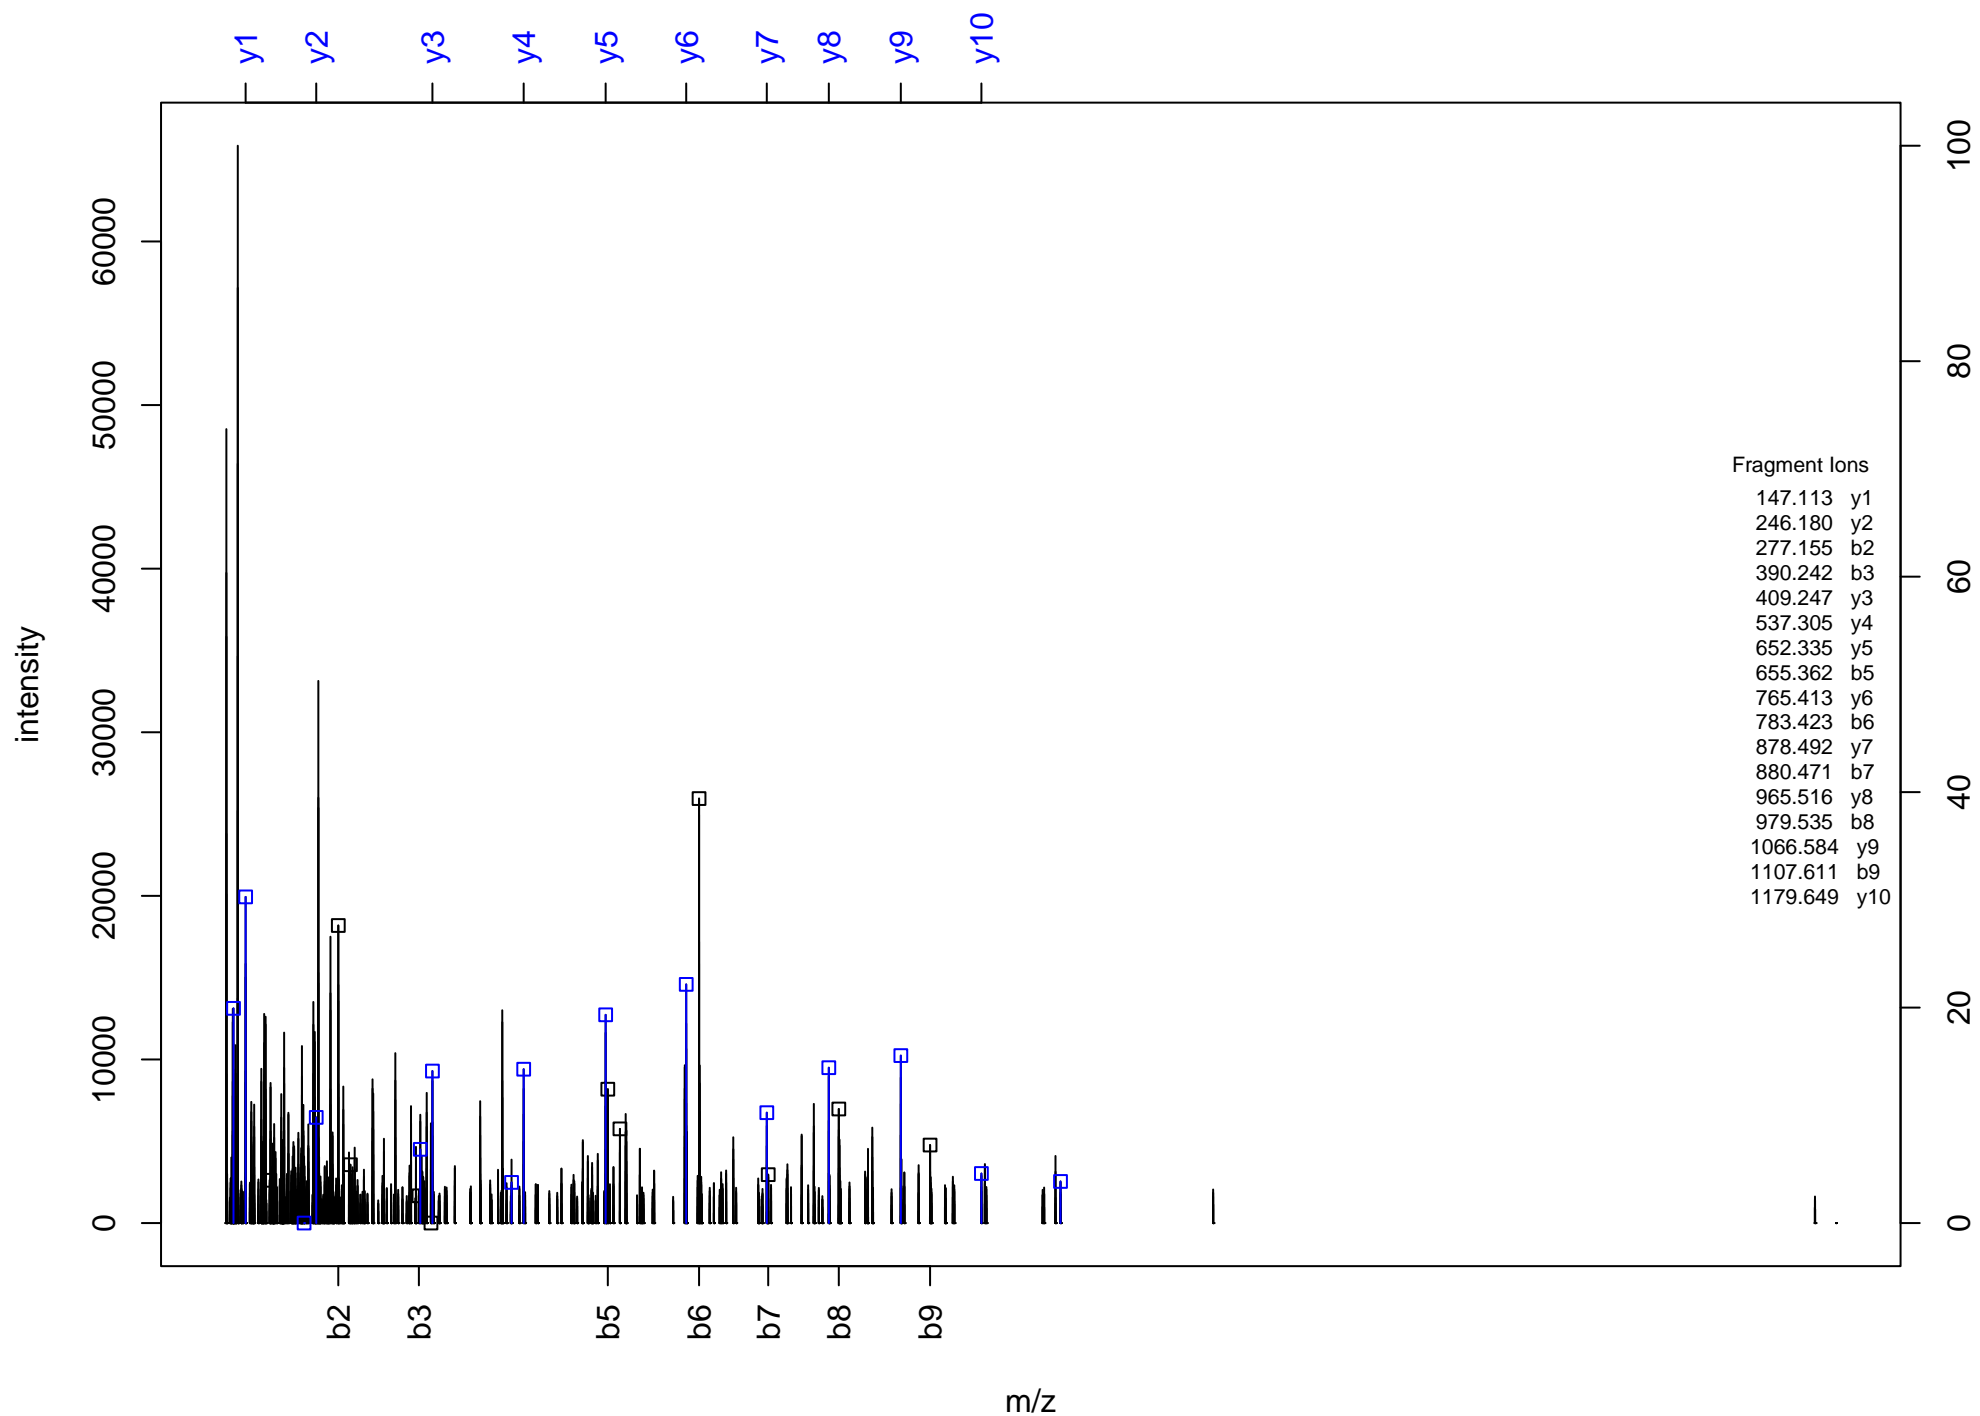

# GLGGILLEDIEEGLPNSQK

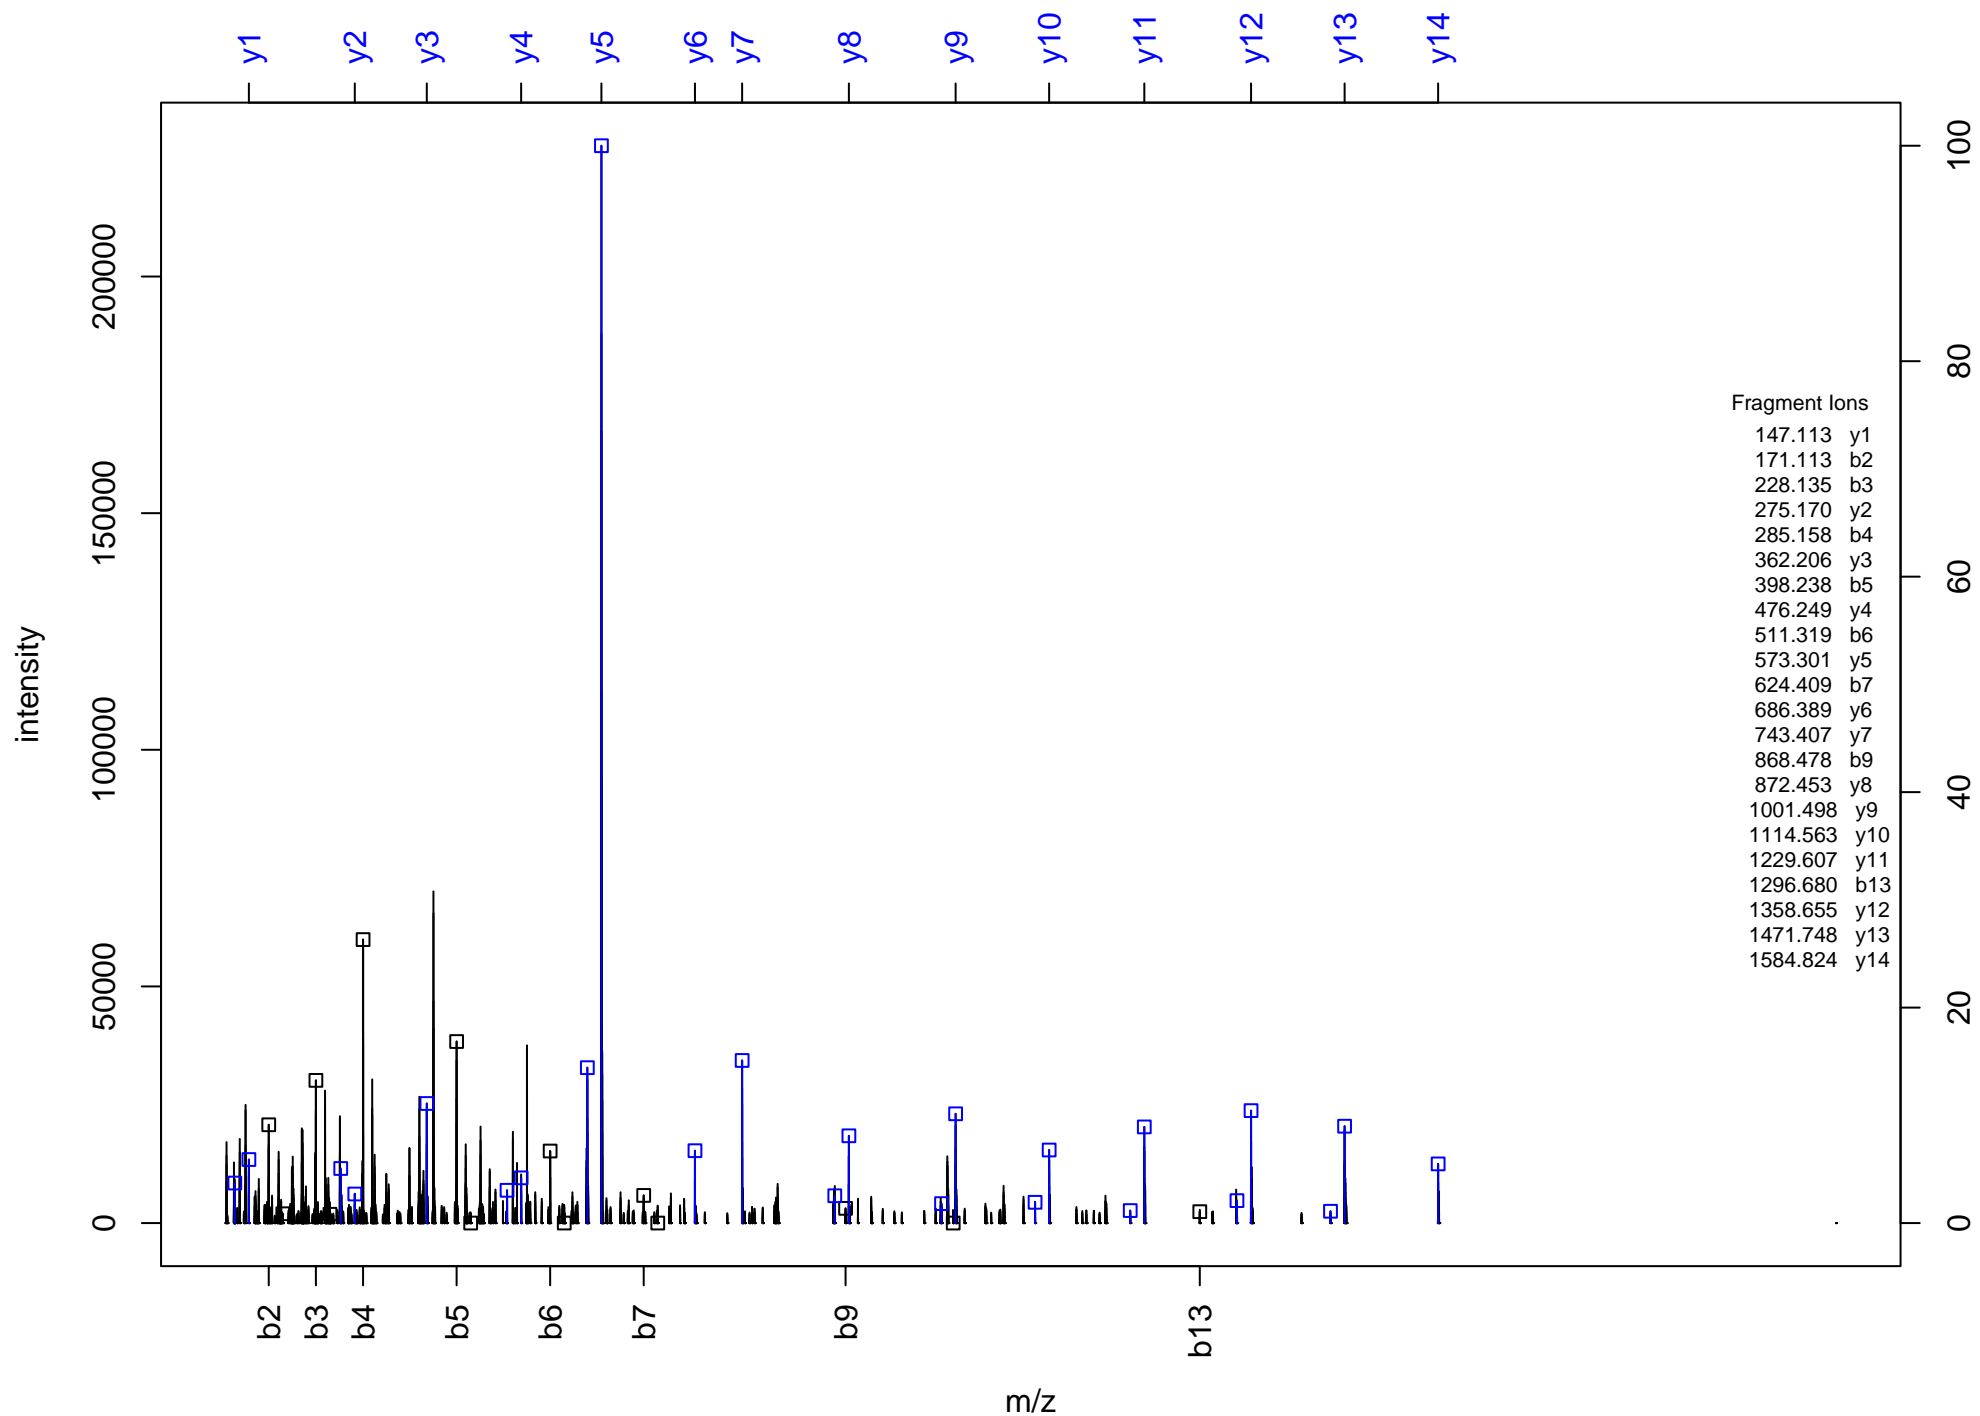

# SCAAIAELLQSK

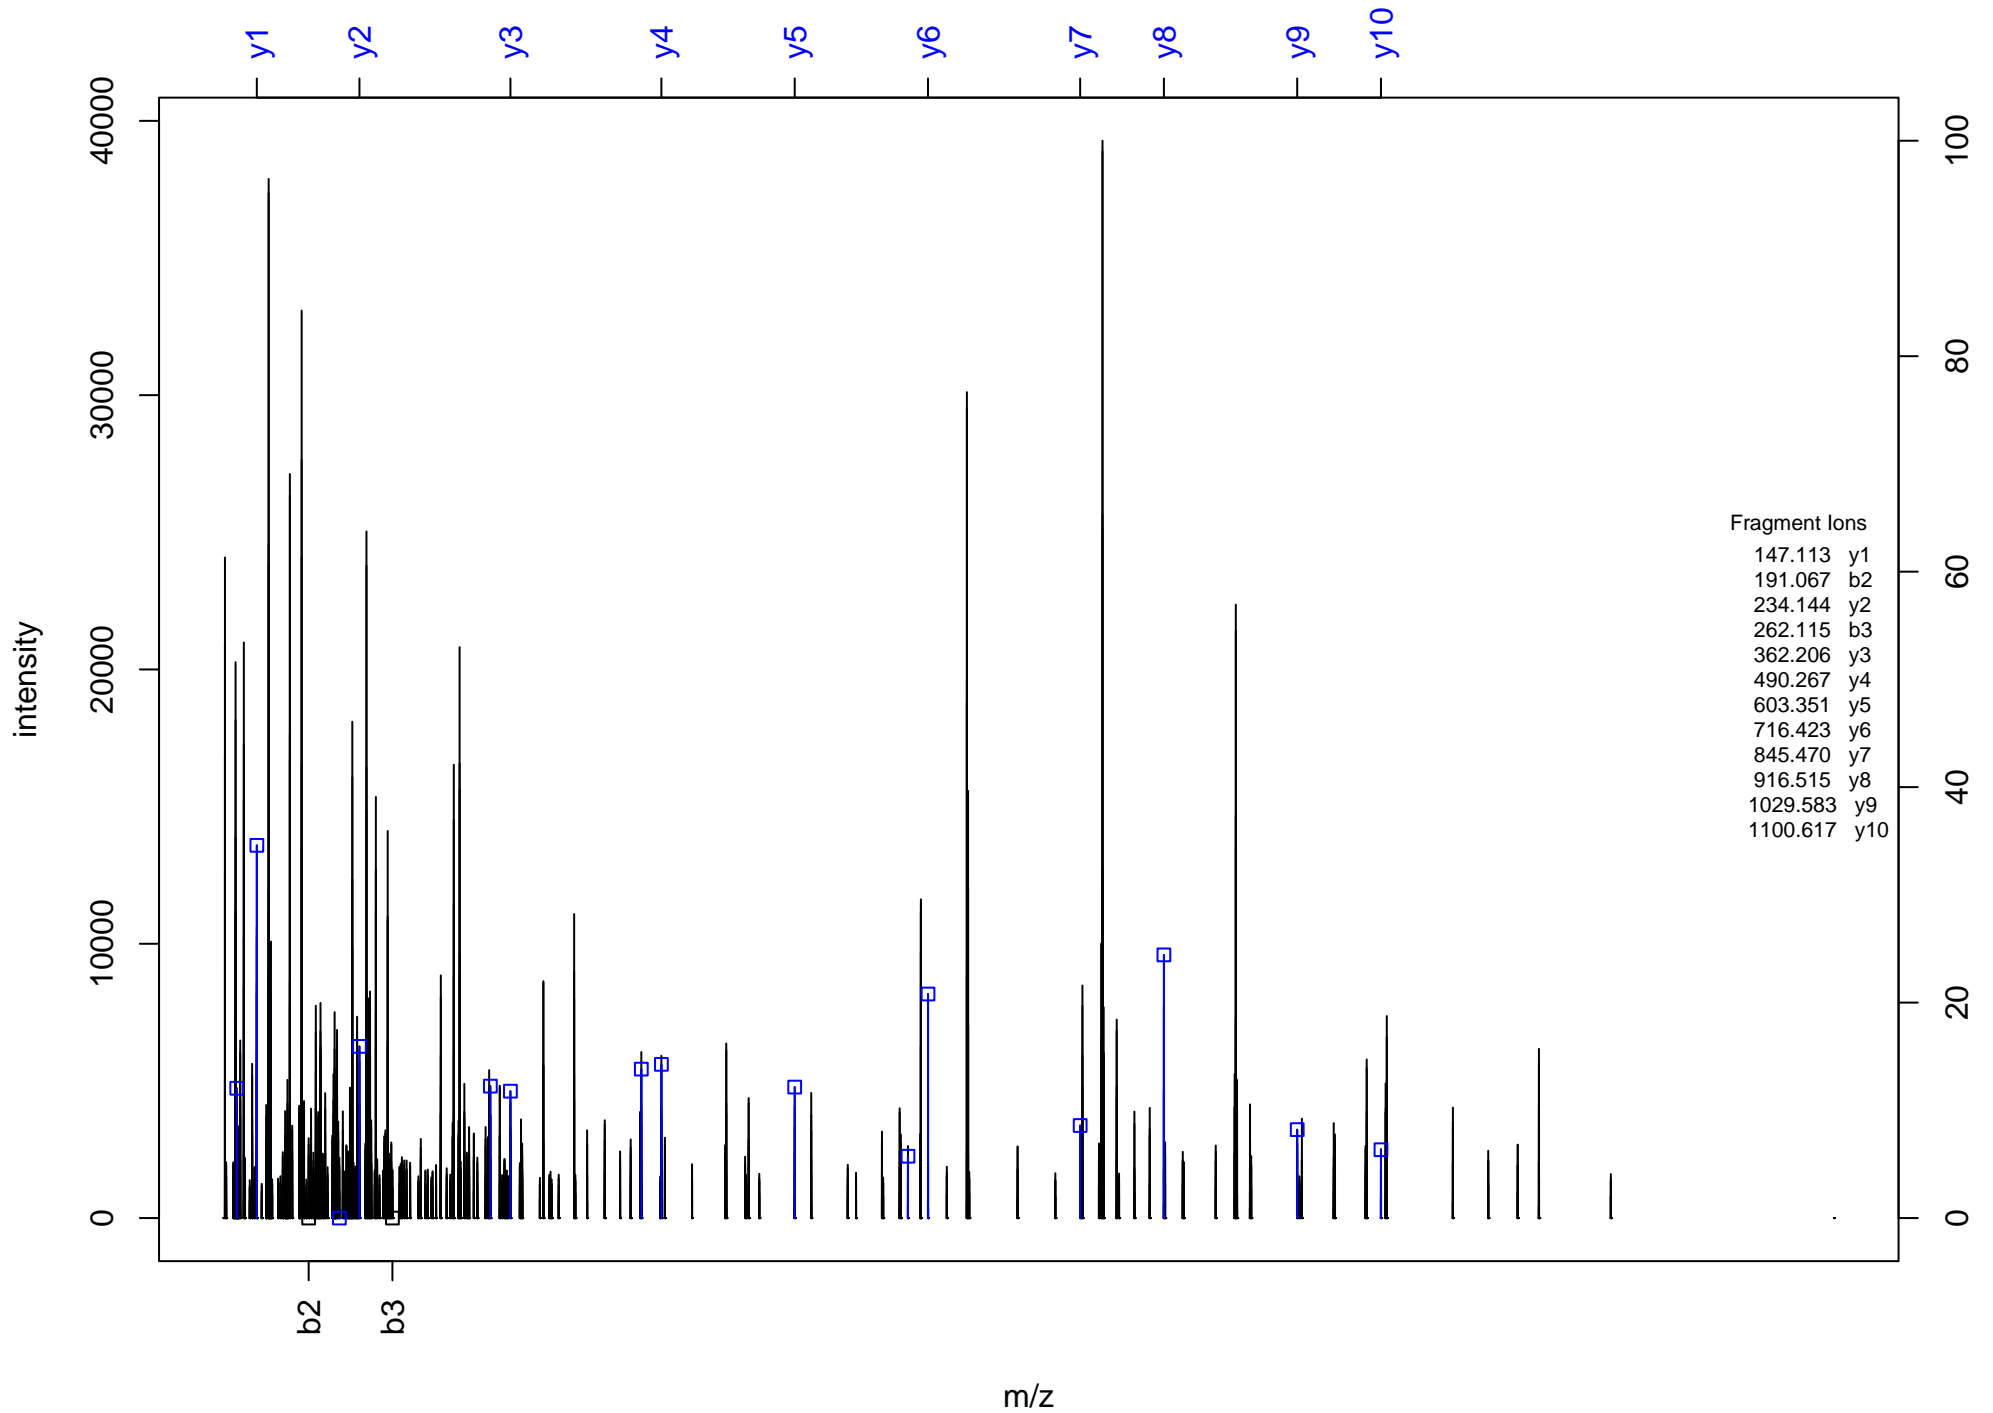

# IN<sup>N</sup>IN<sup>L</sup>VCTPGR

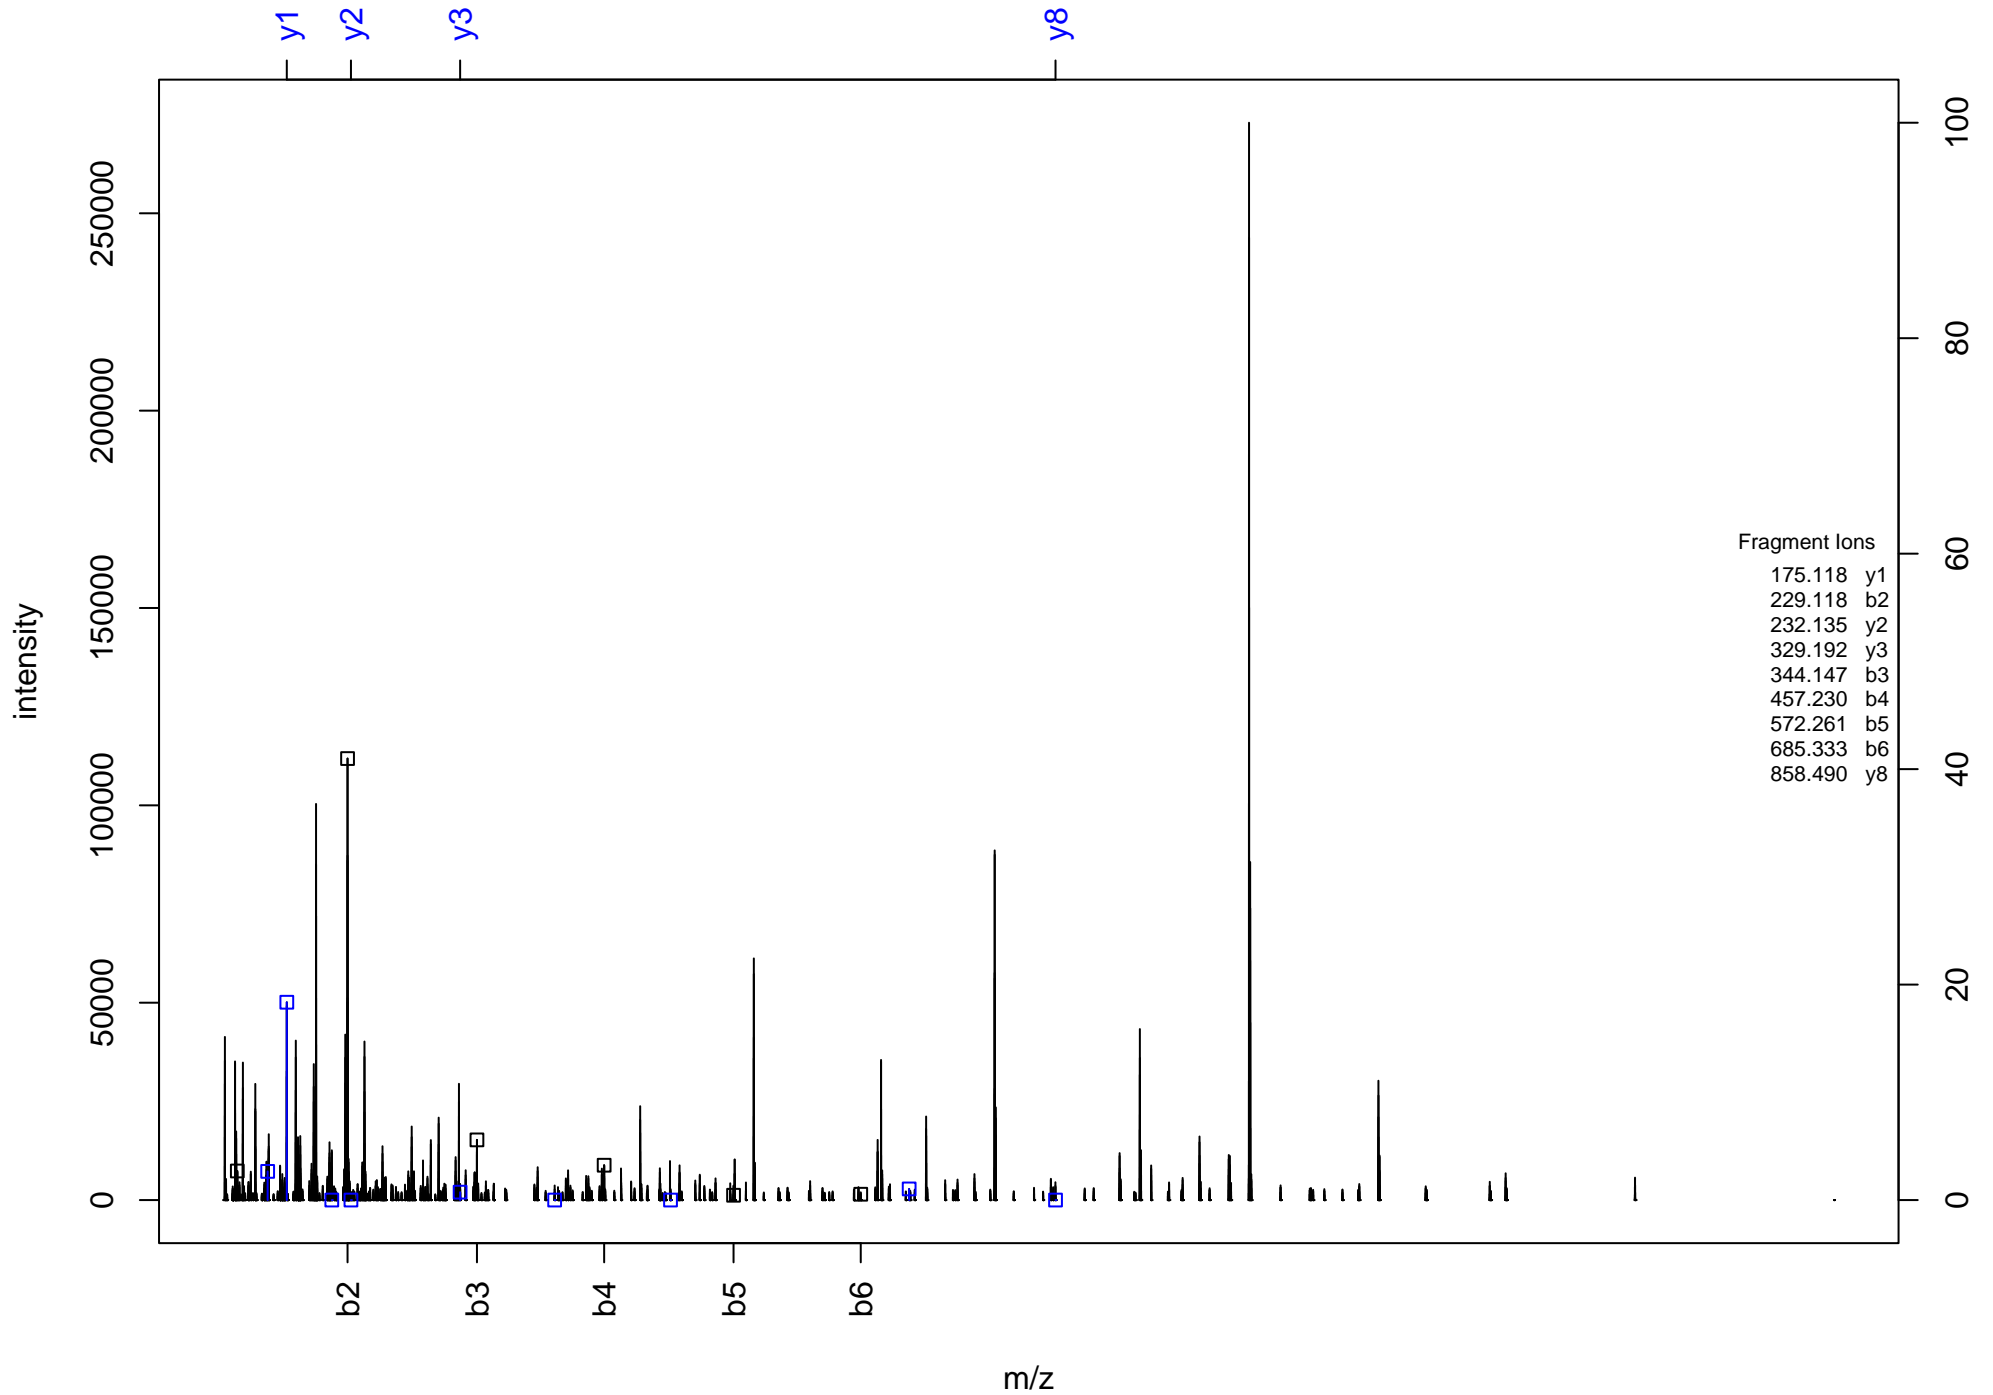

# LILISTN^GSFIR

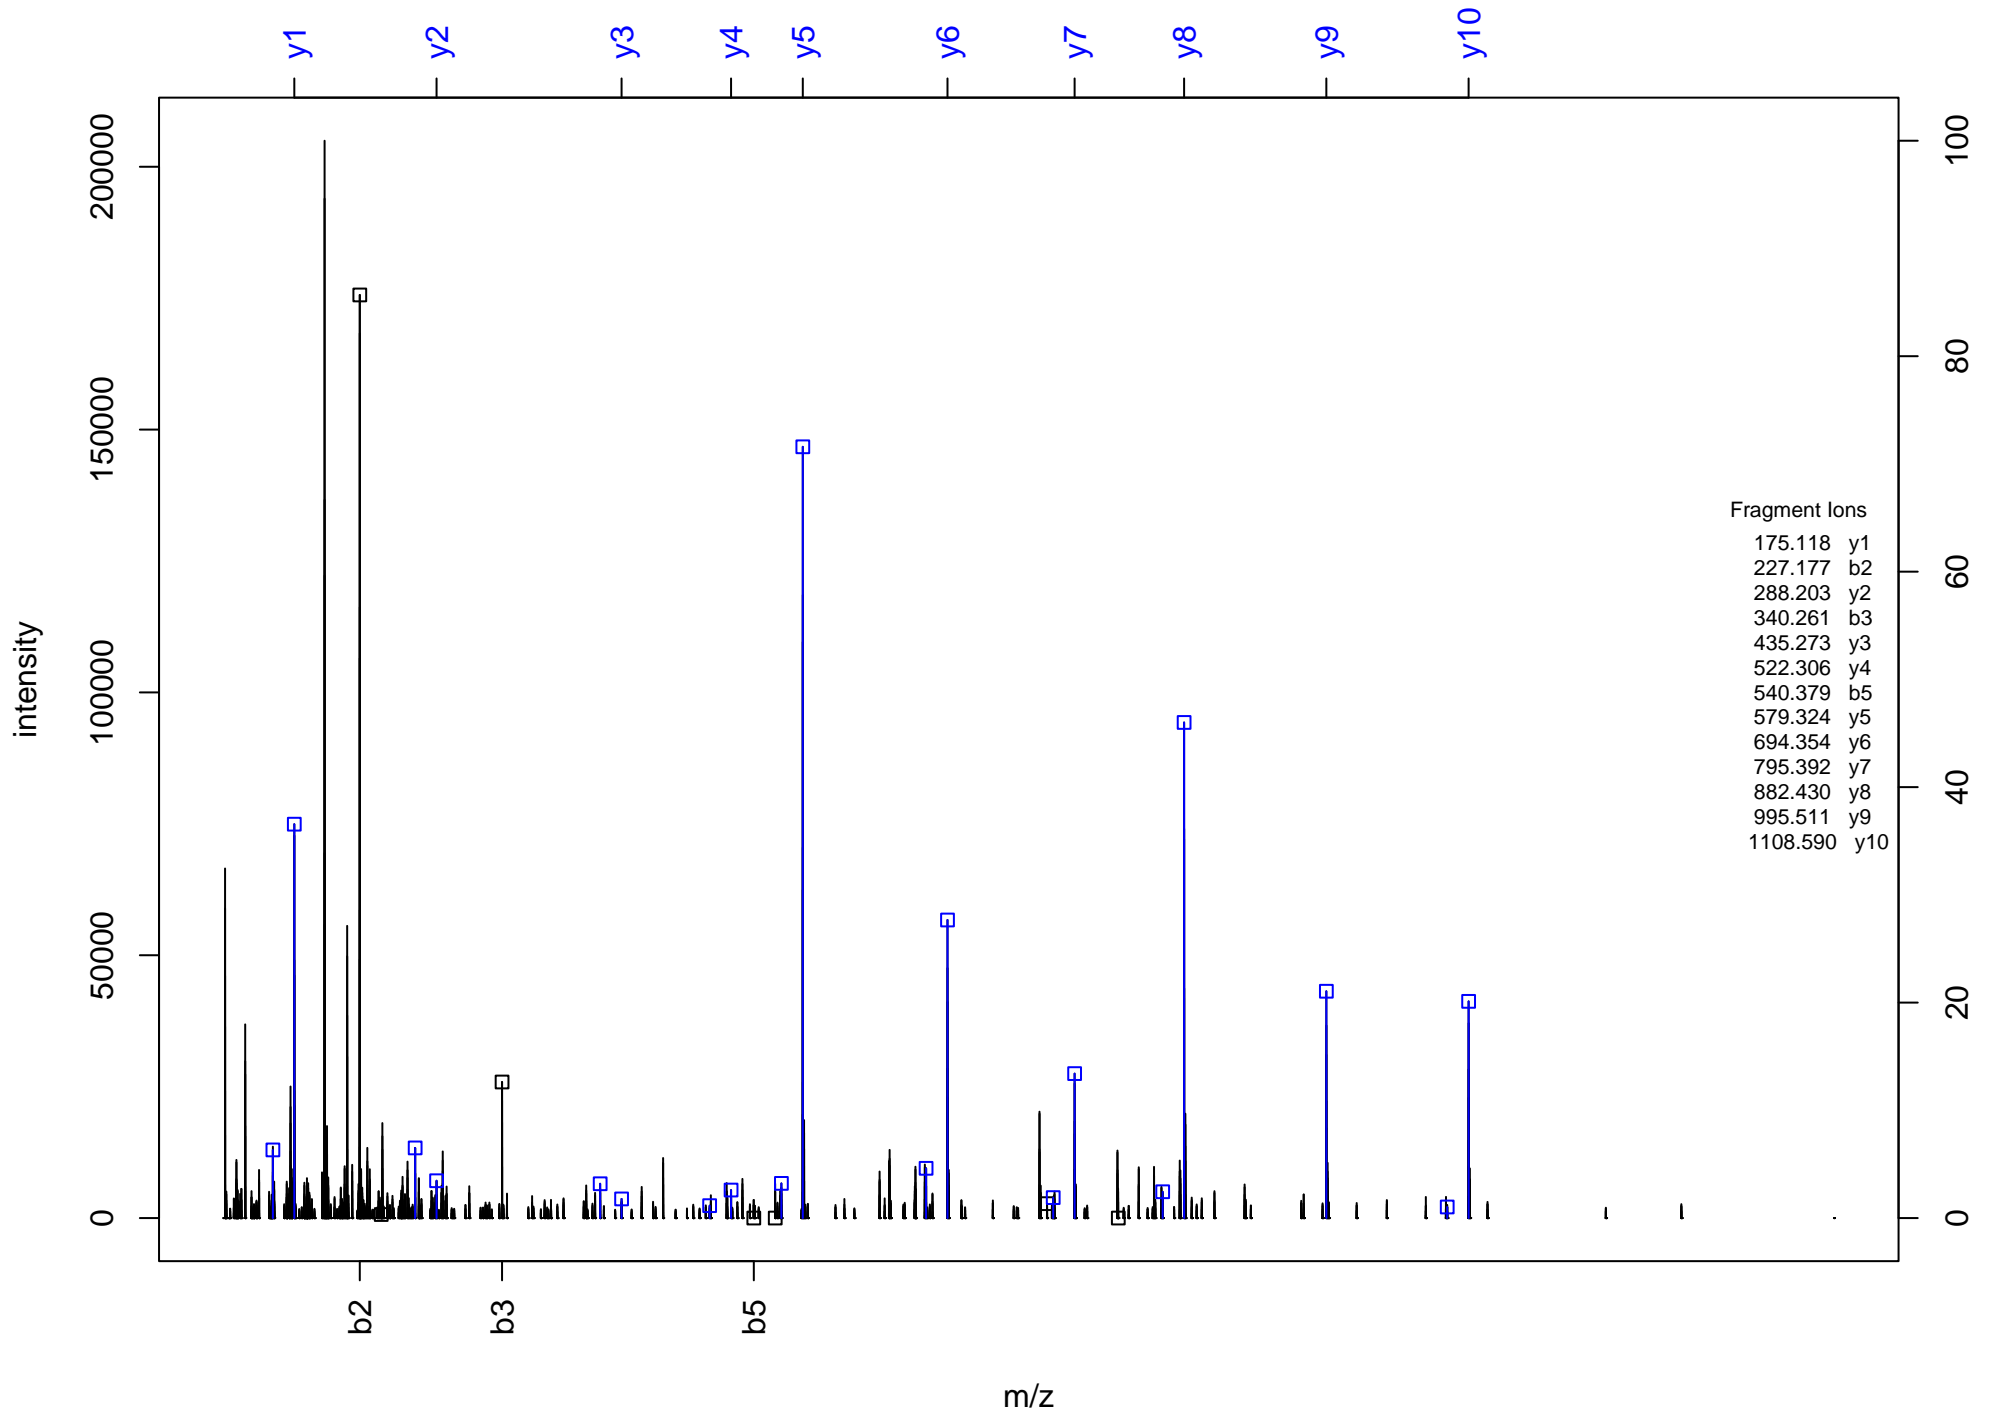



# DPSYSYNPSGQGLSR

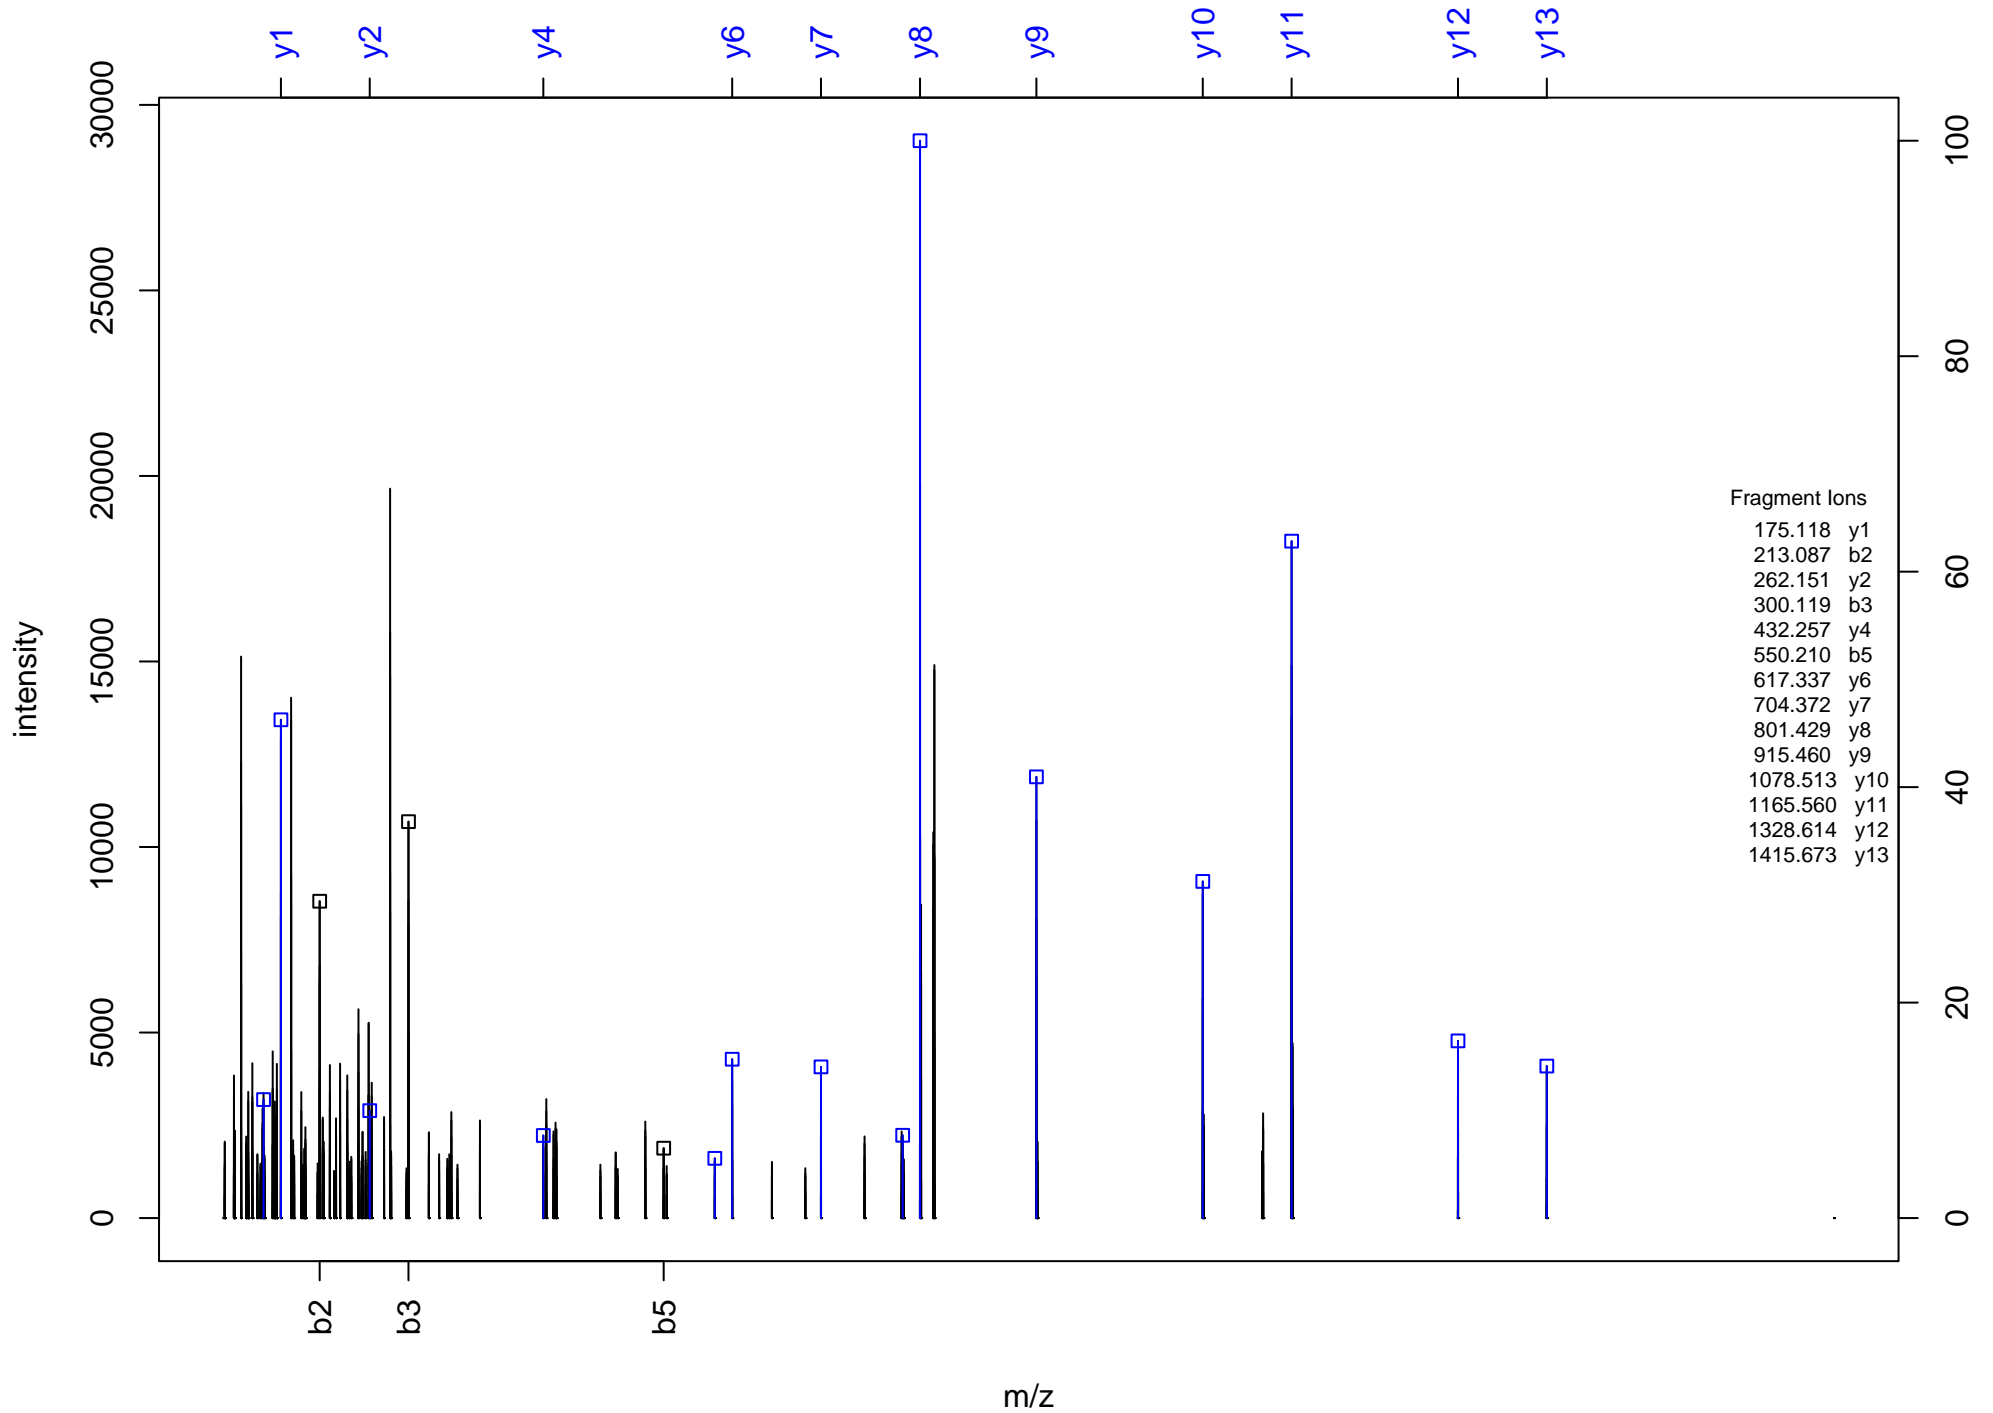

# DTFGEMSDGDMQEQLR

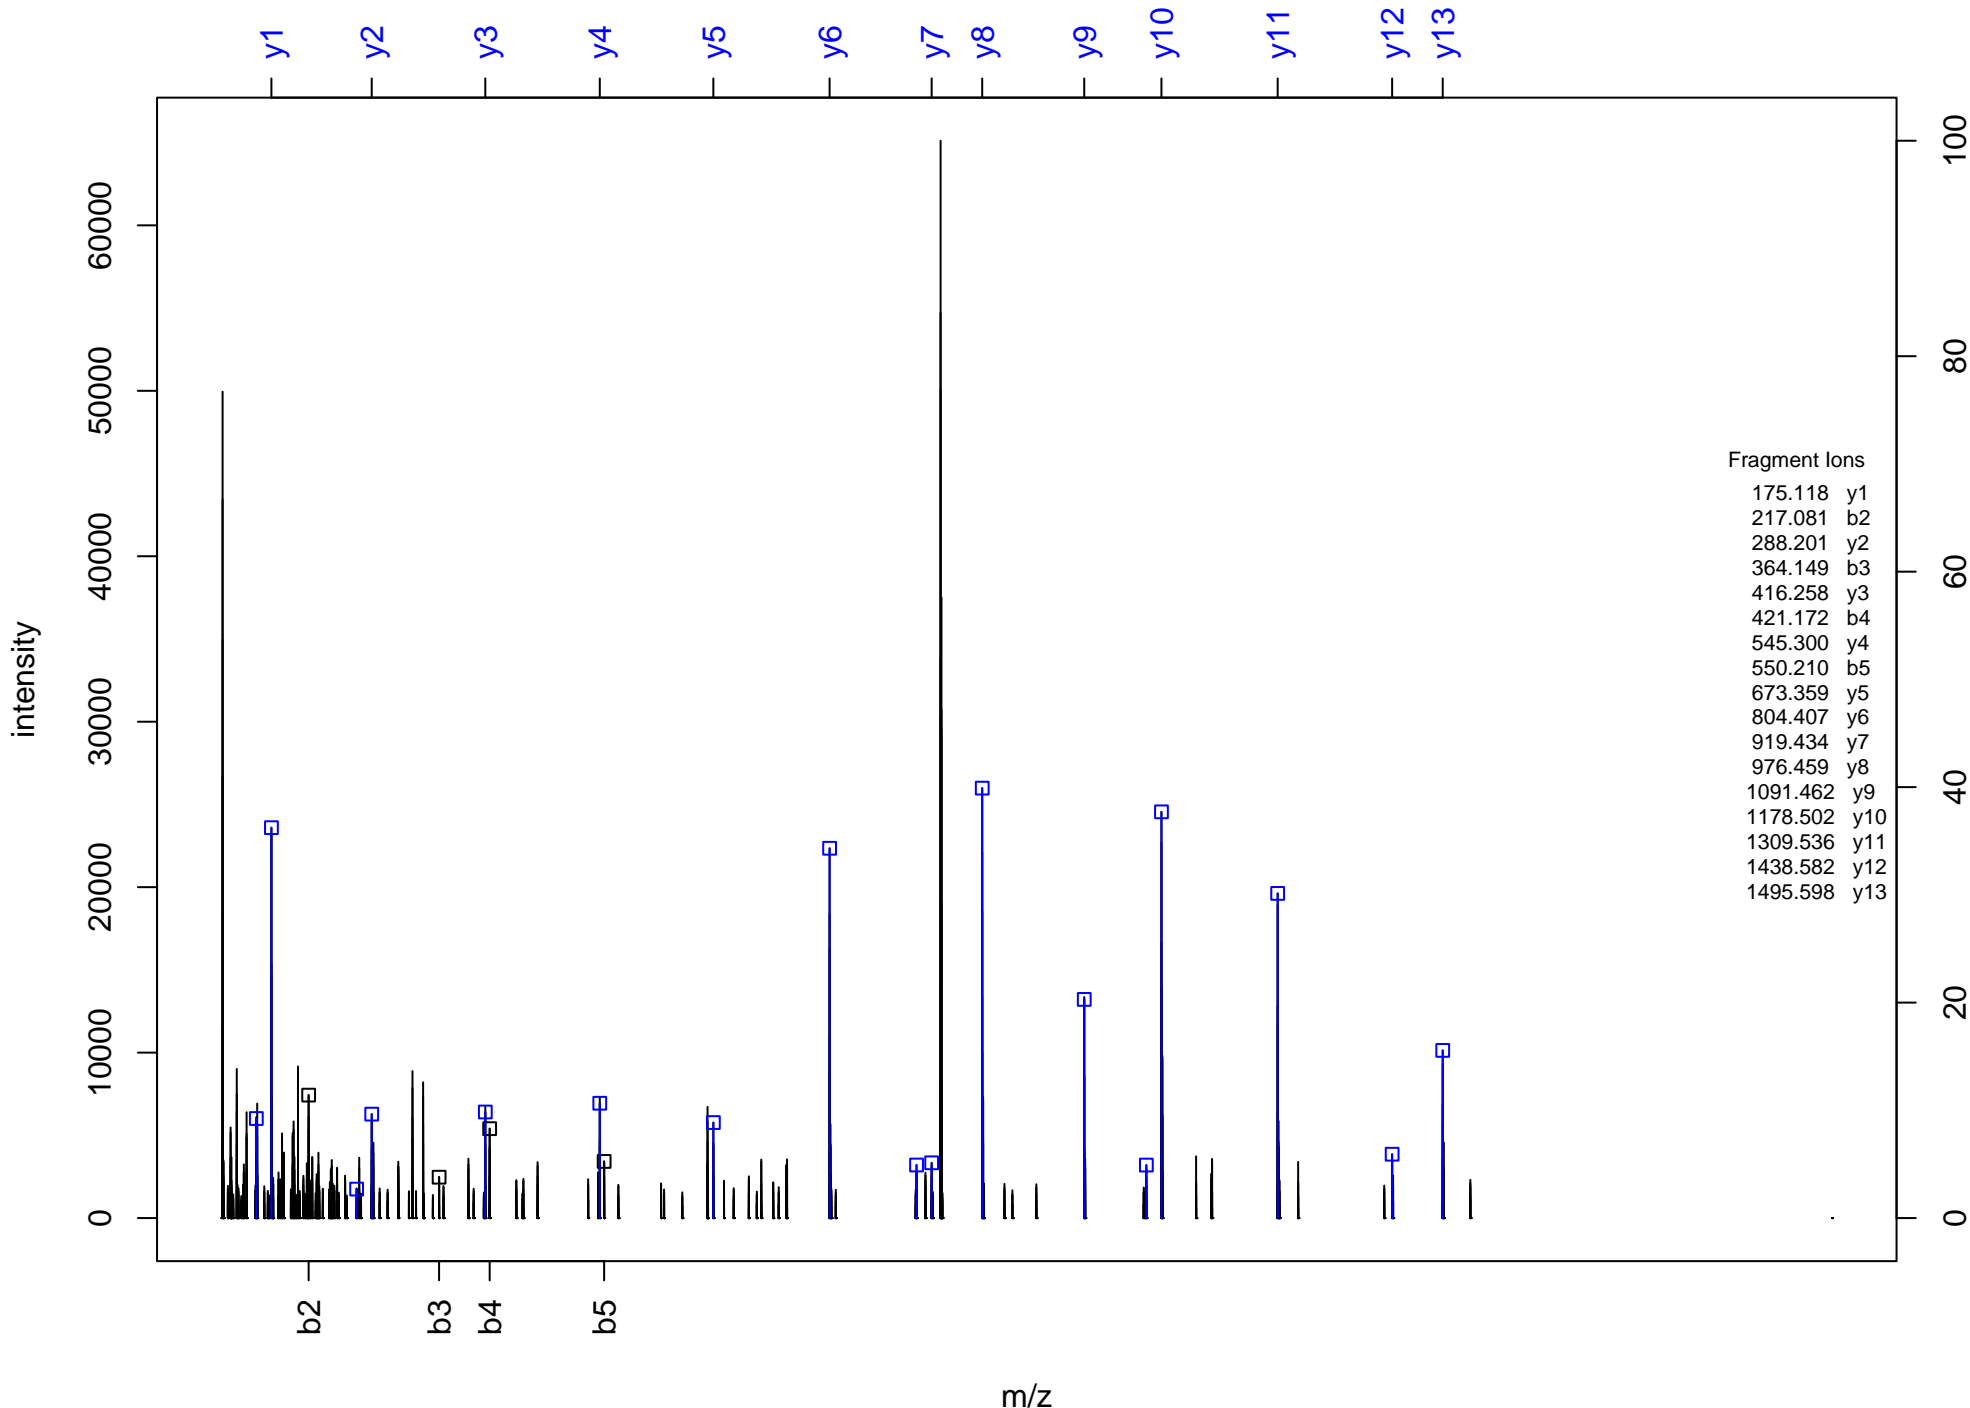

# (Ac)TTQ^GGLVAN^RGR

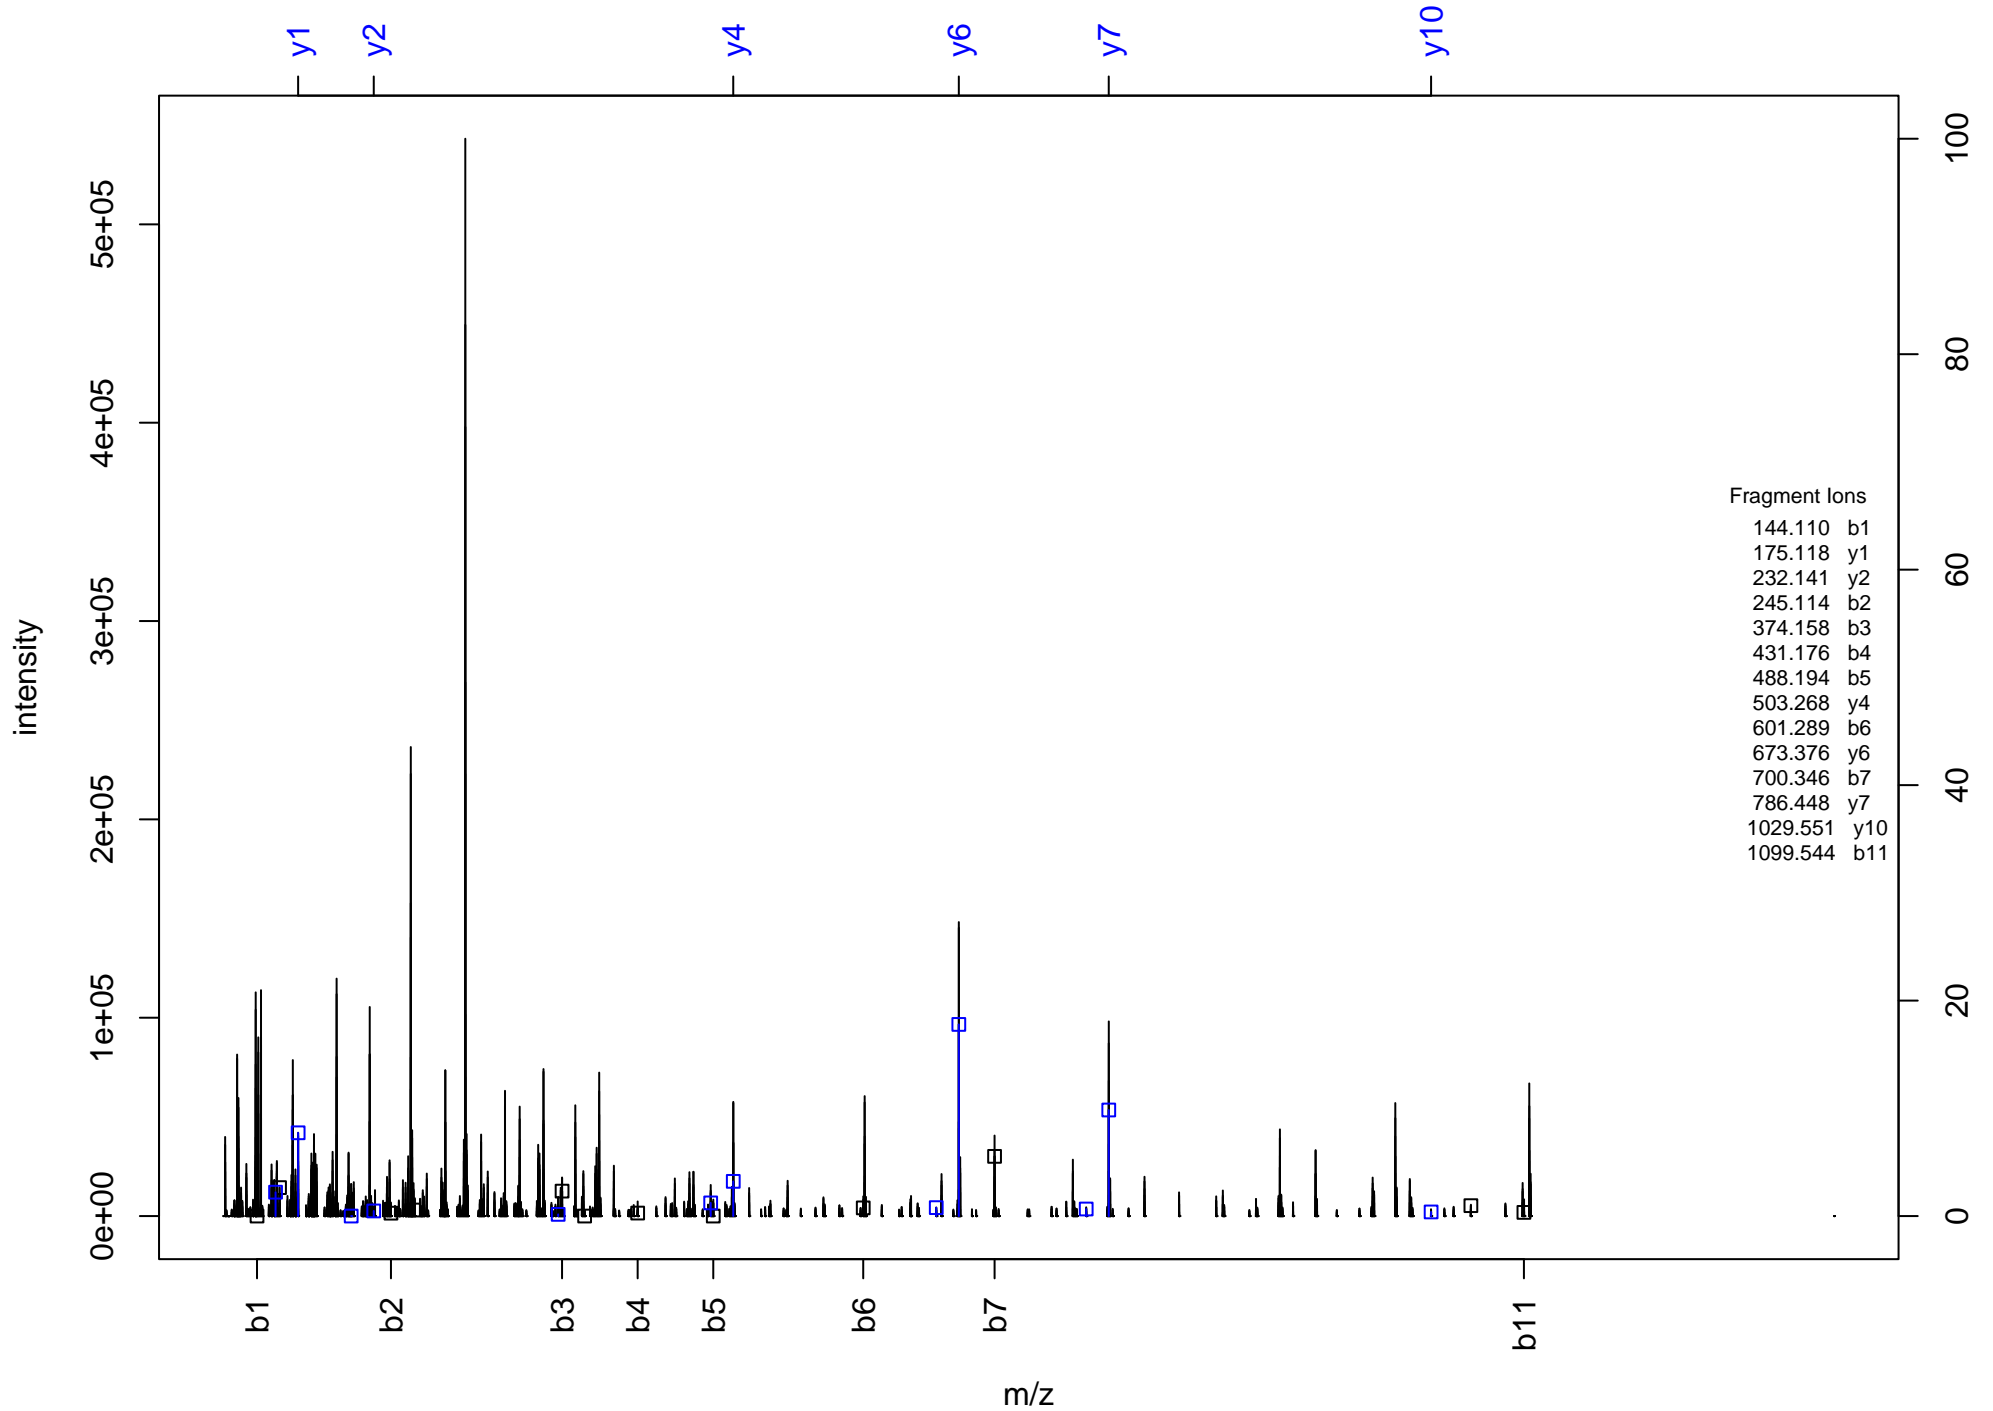

# SDPLLMGIPTSENPFK

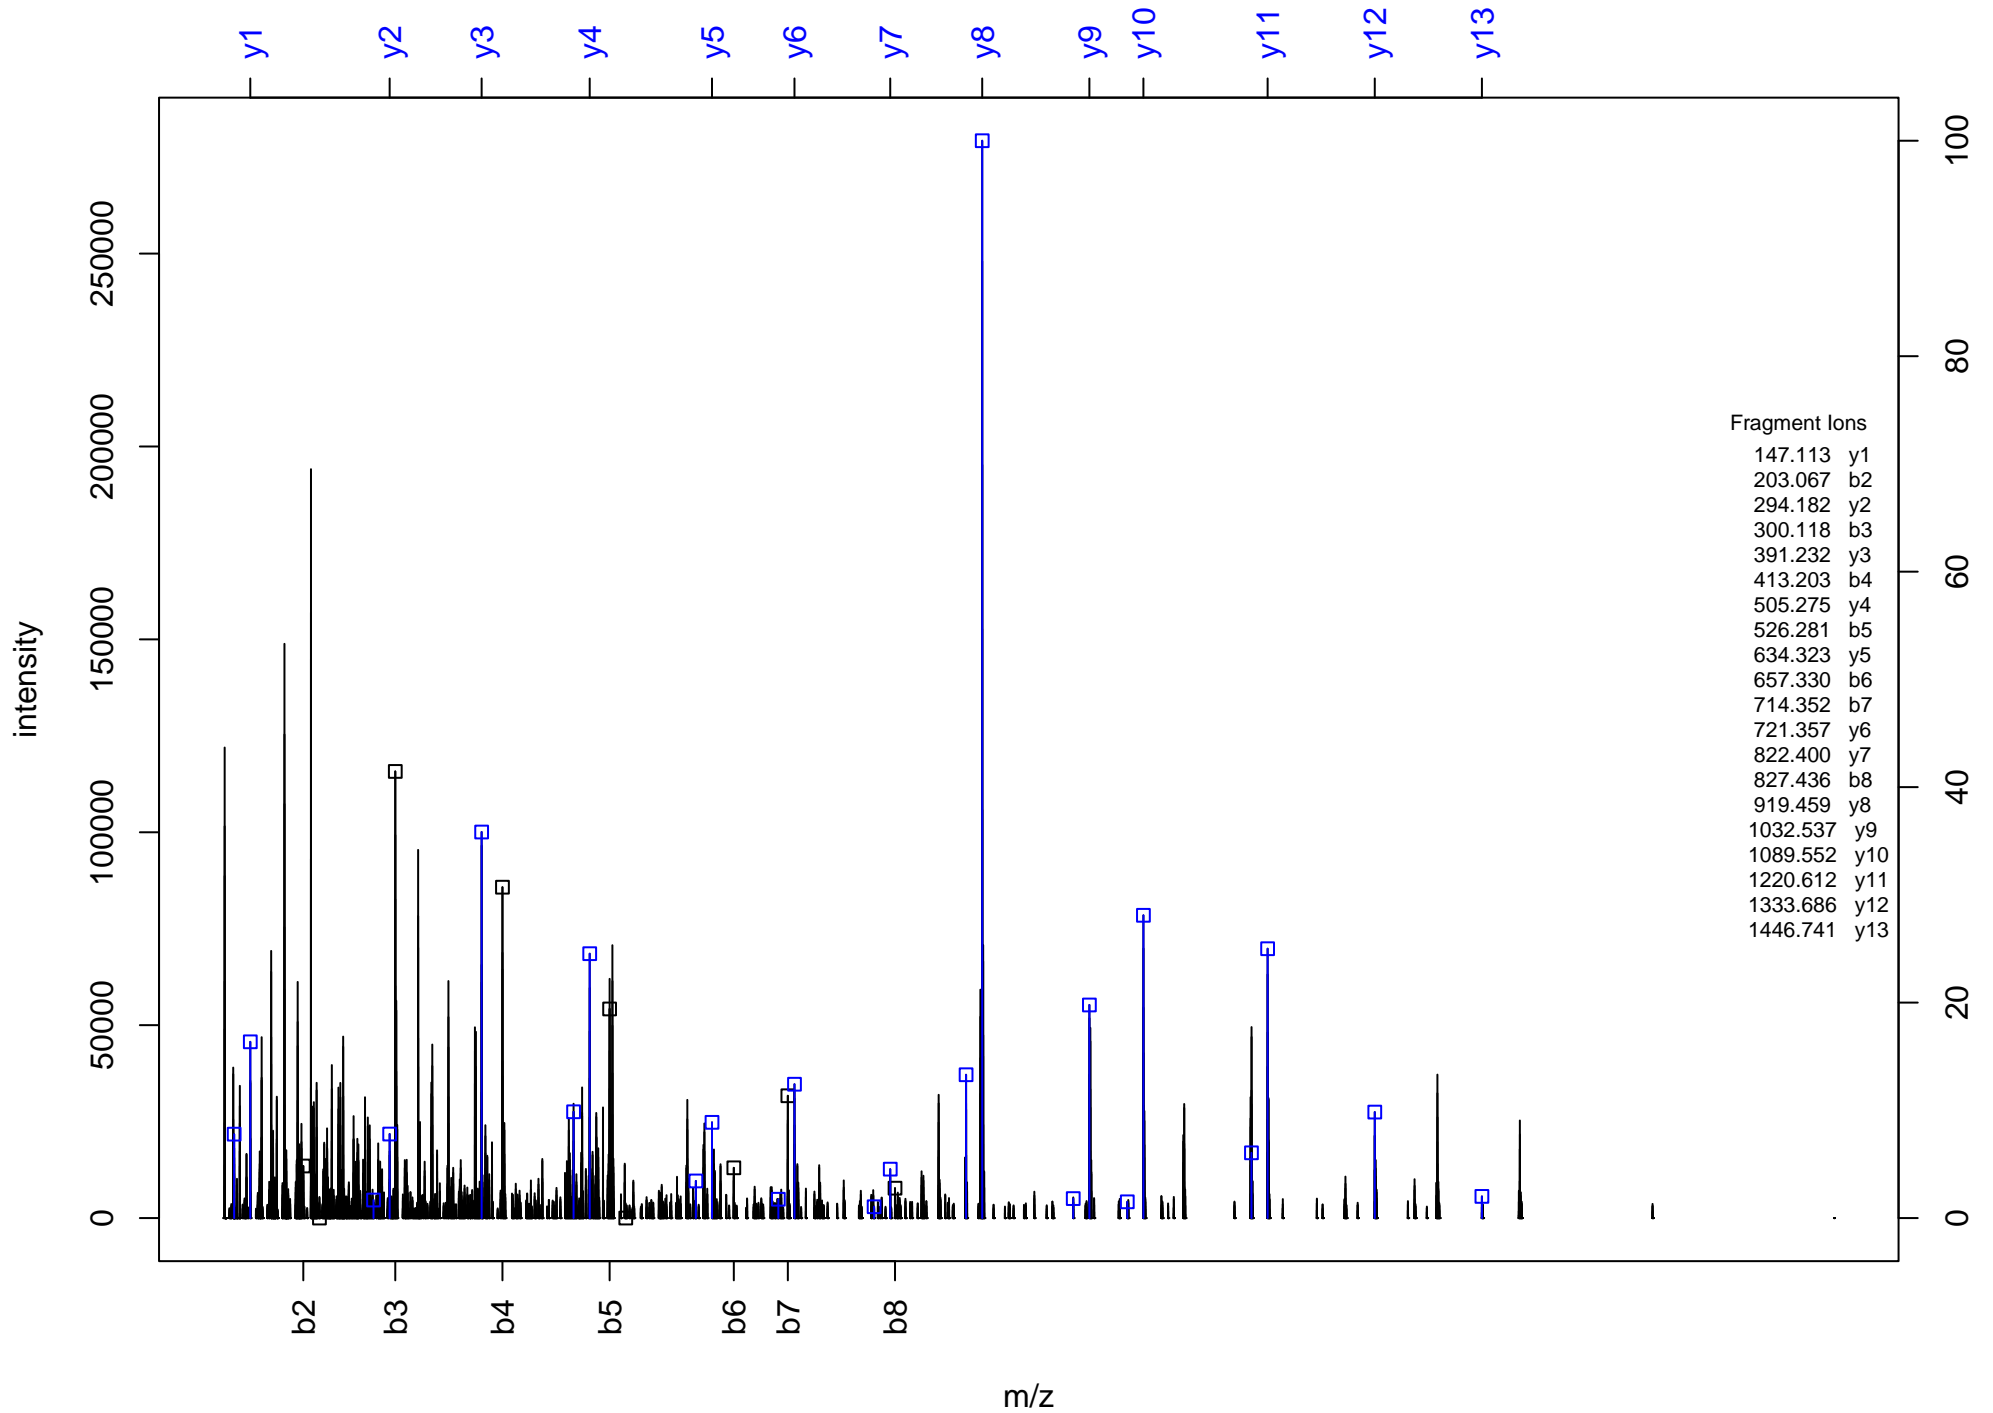

# LPDGSSFTNQFPSDAPLEEAR

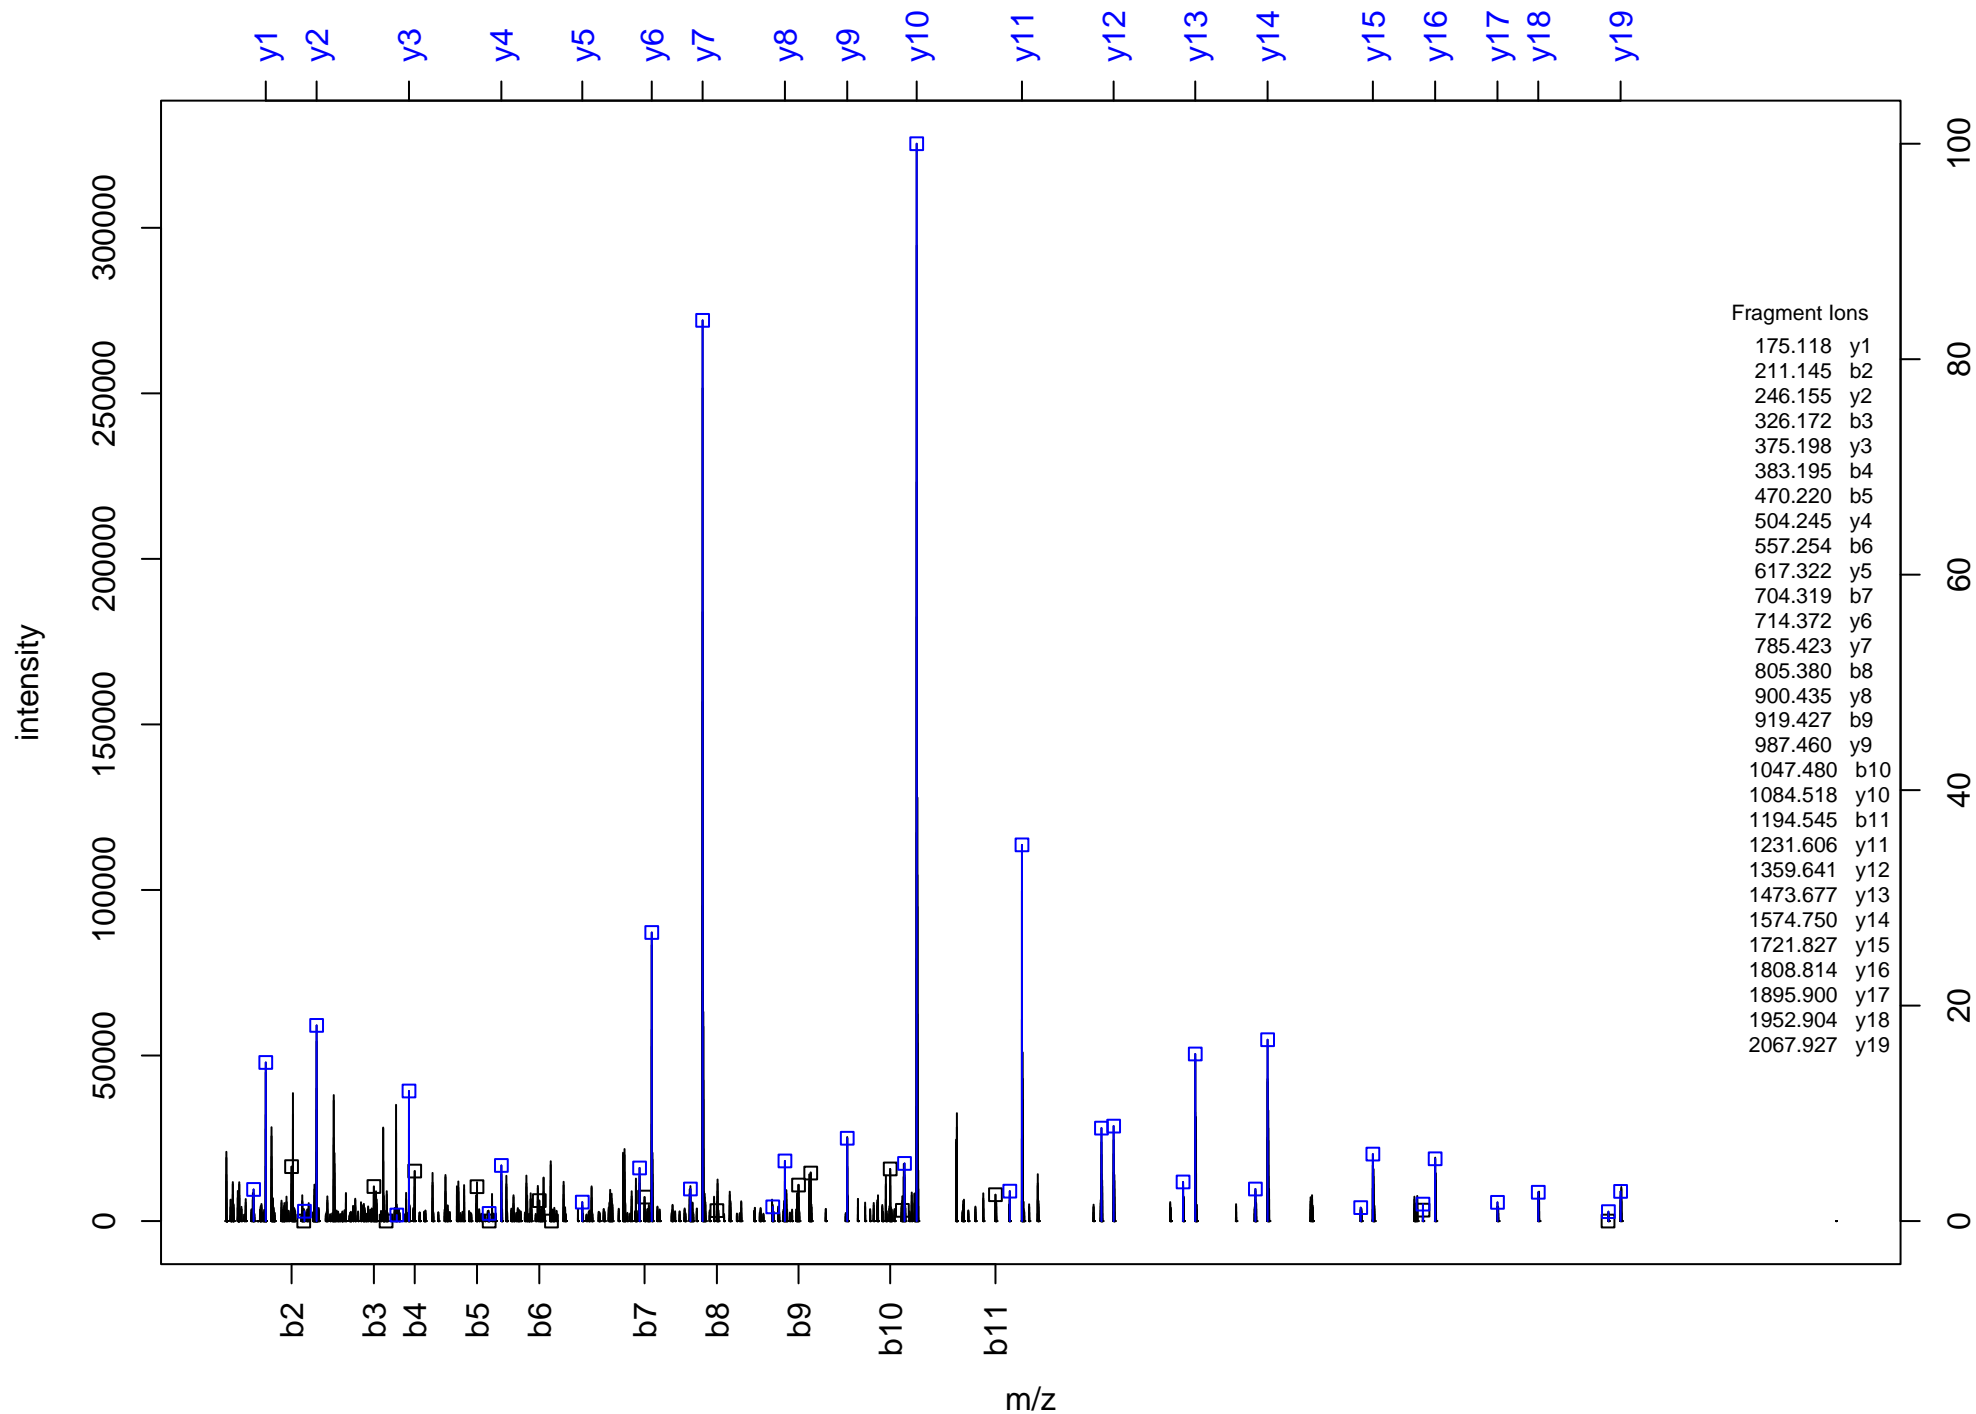

# SGERPVTAGEEDEEVPDSIDAR

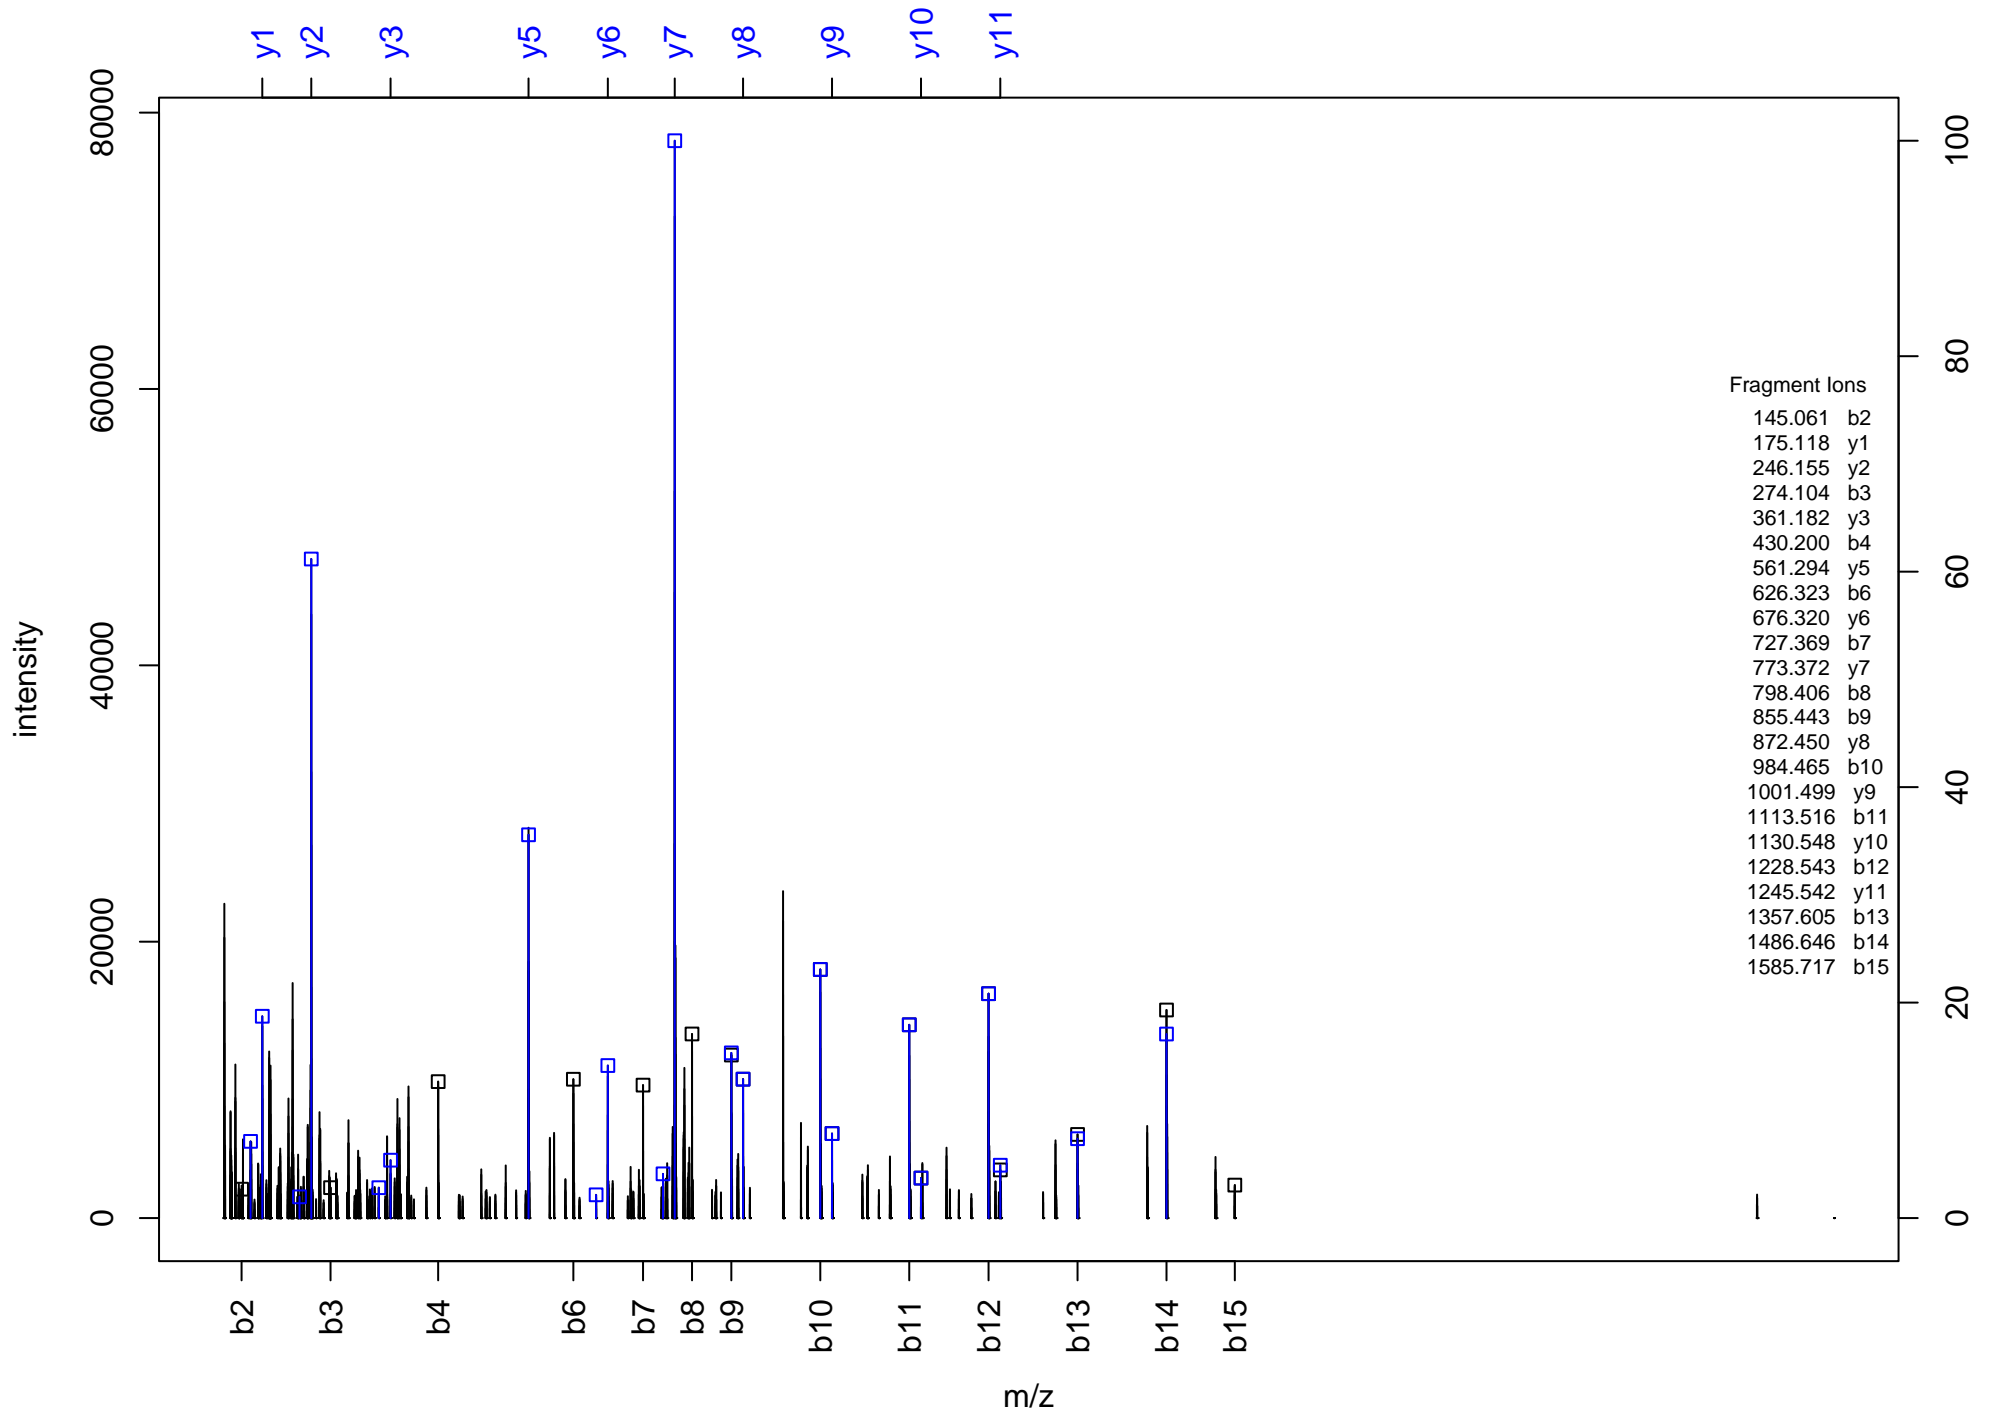

# (Ac)ATQAHLSYAGCNFLR

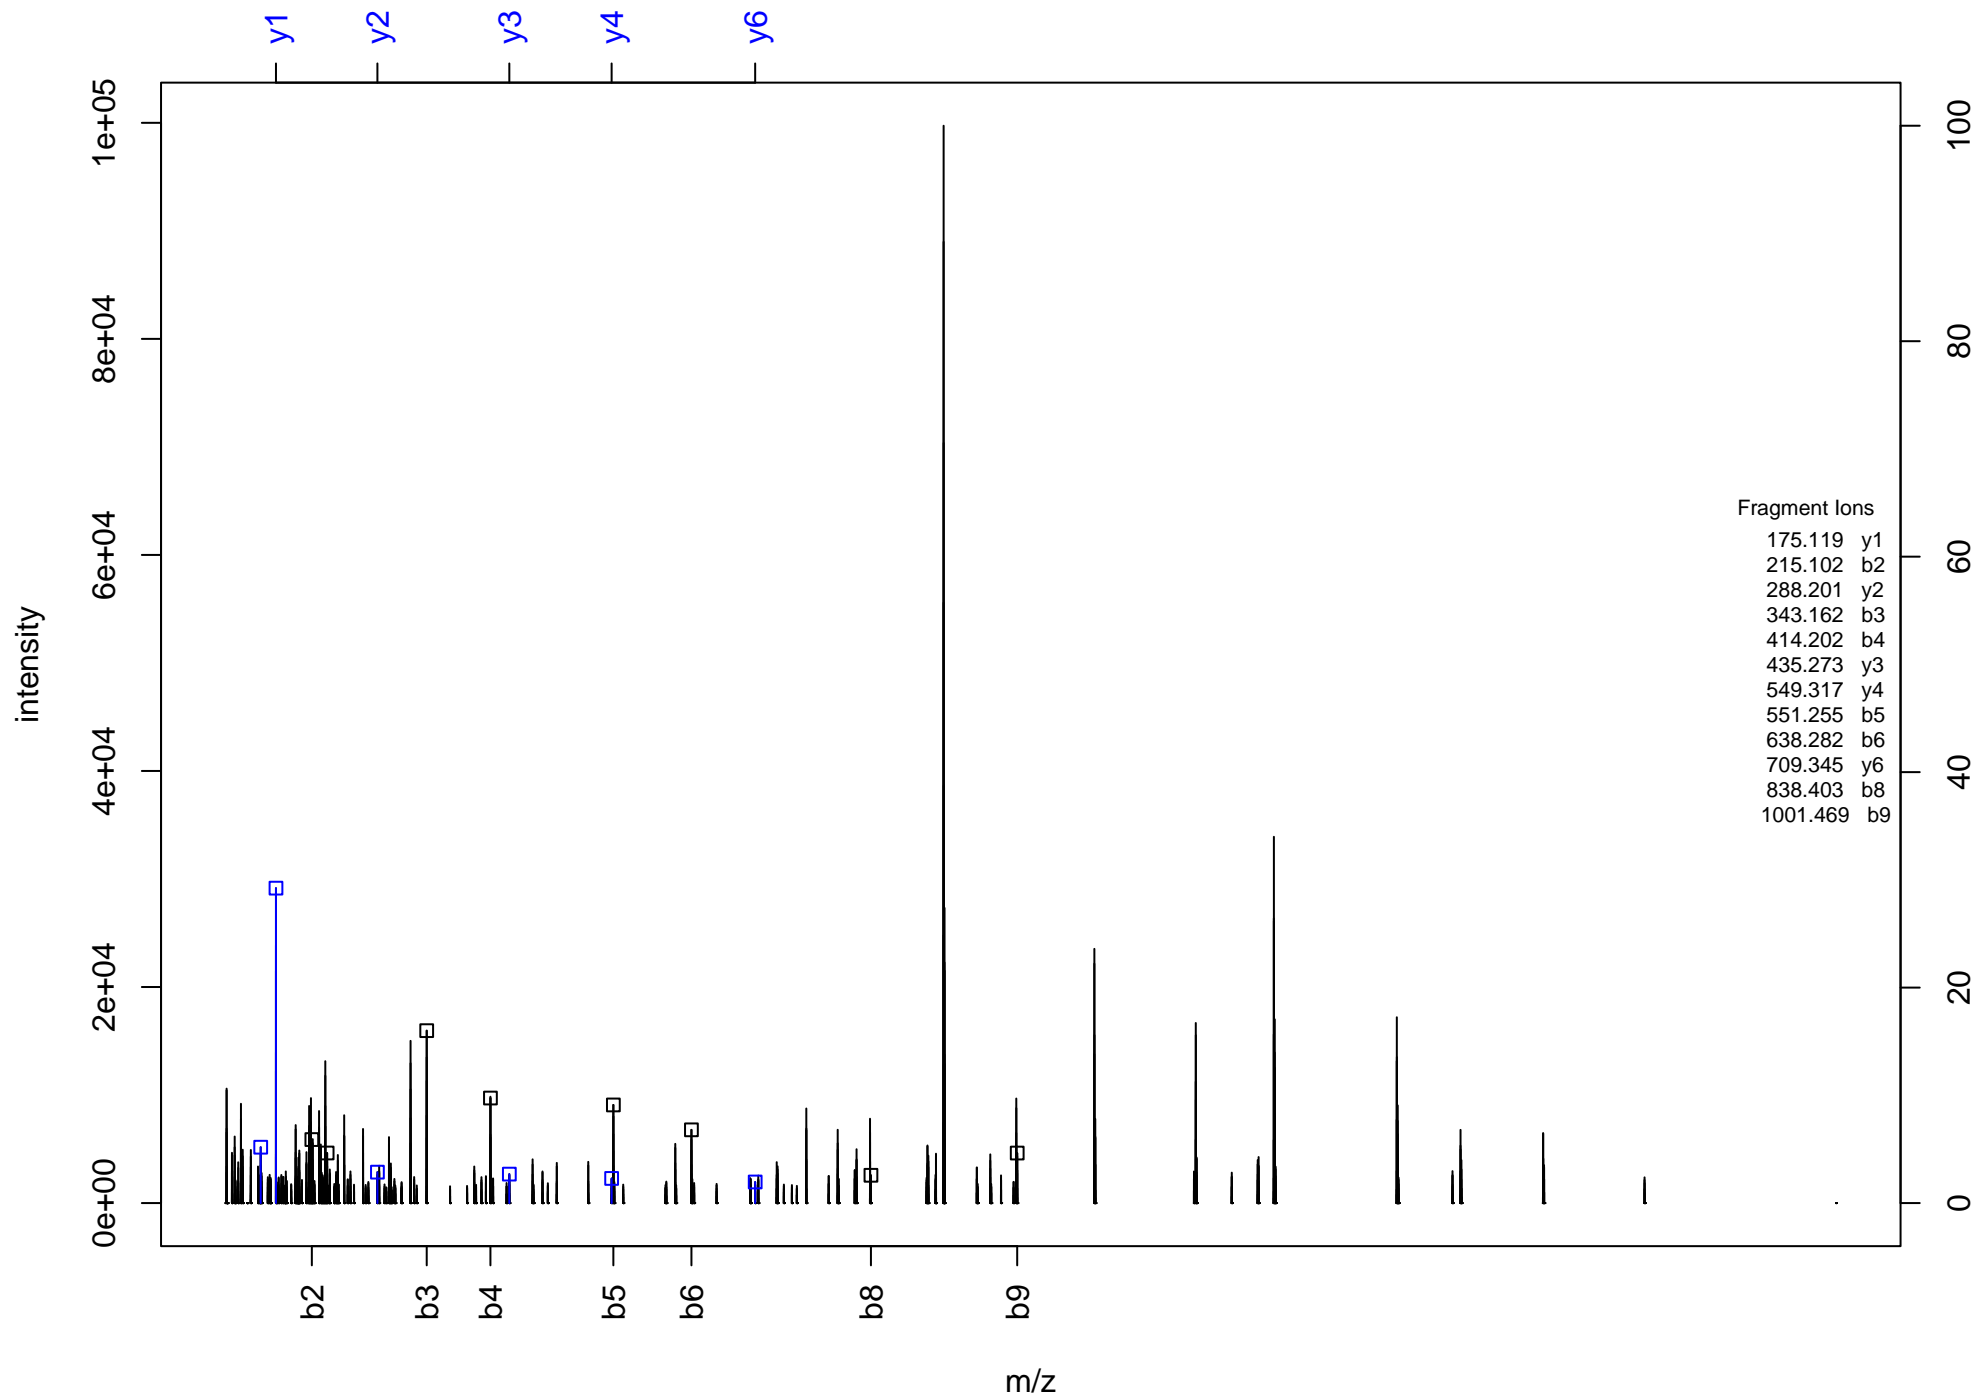

# AVEYFQDNSPDSPENLK

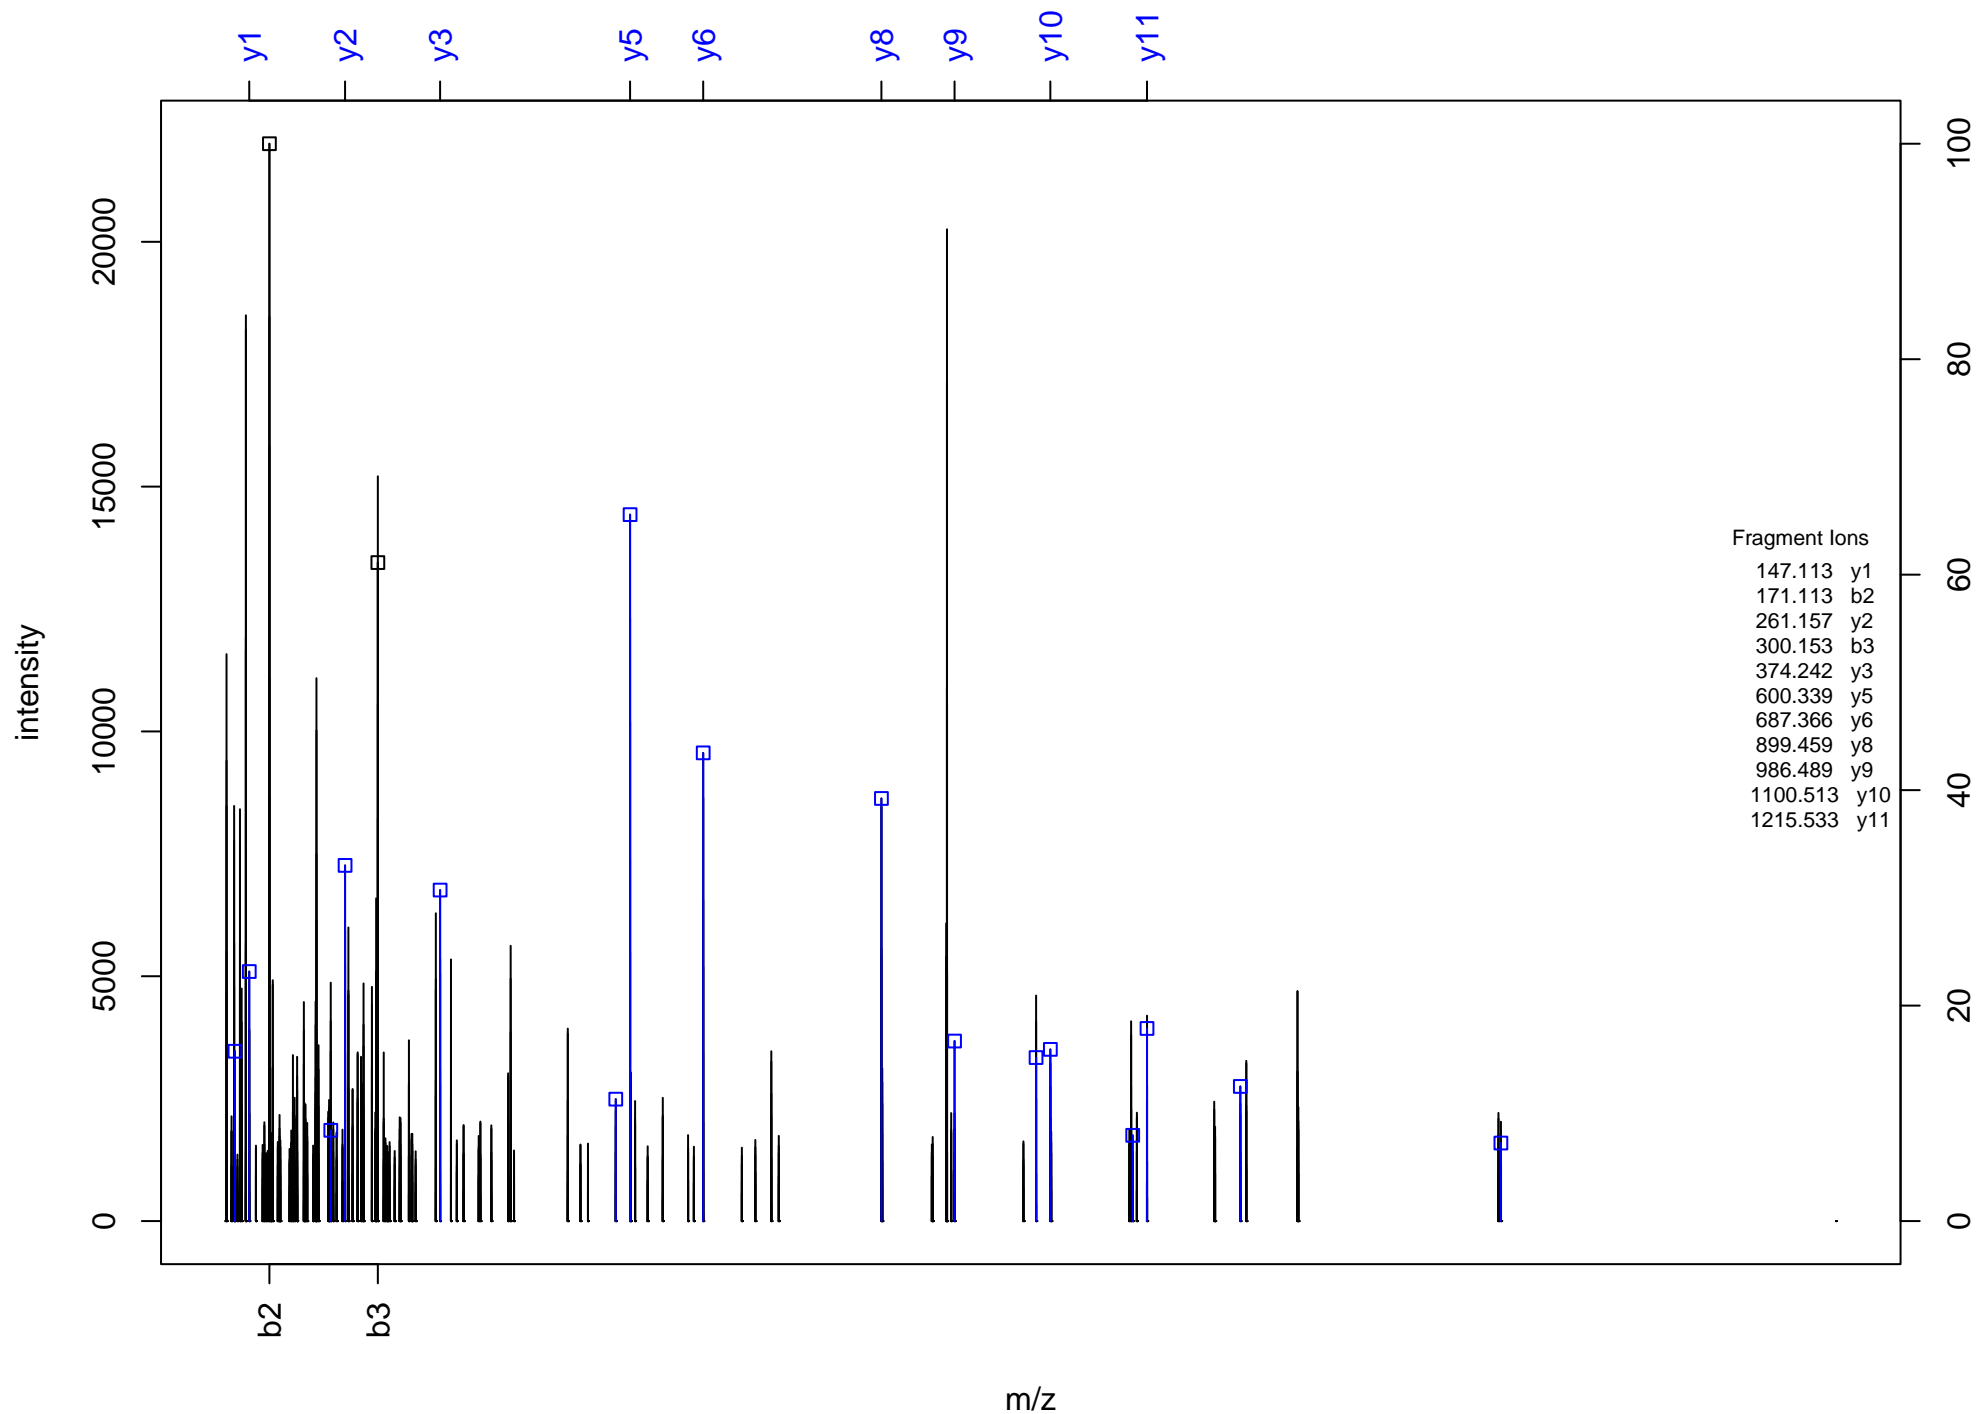



# NAAFQSGGANSDSNSVGNAQPTSAPSVESHVPVLEK

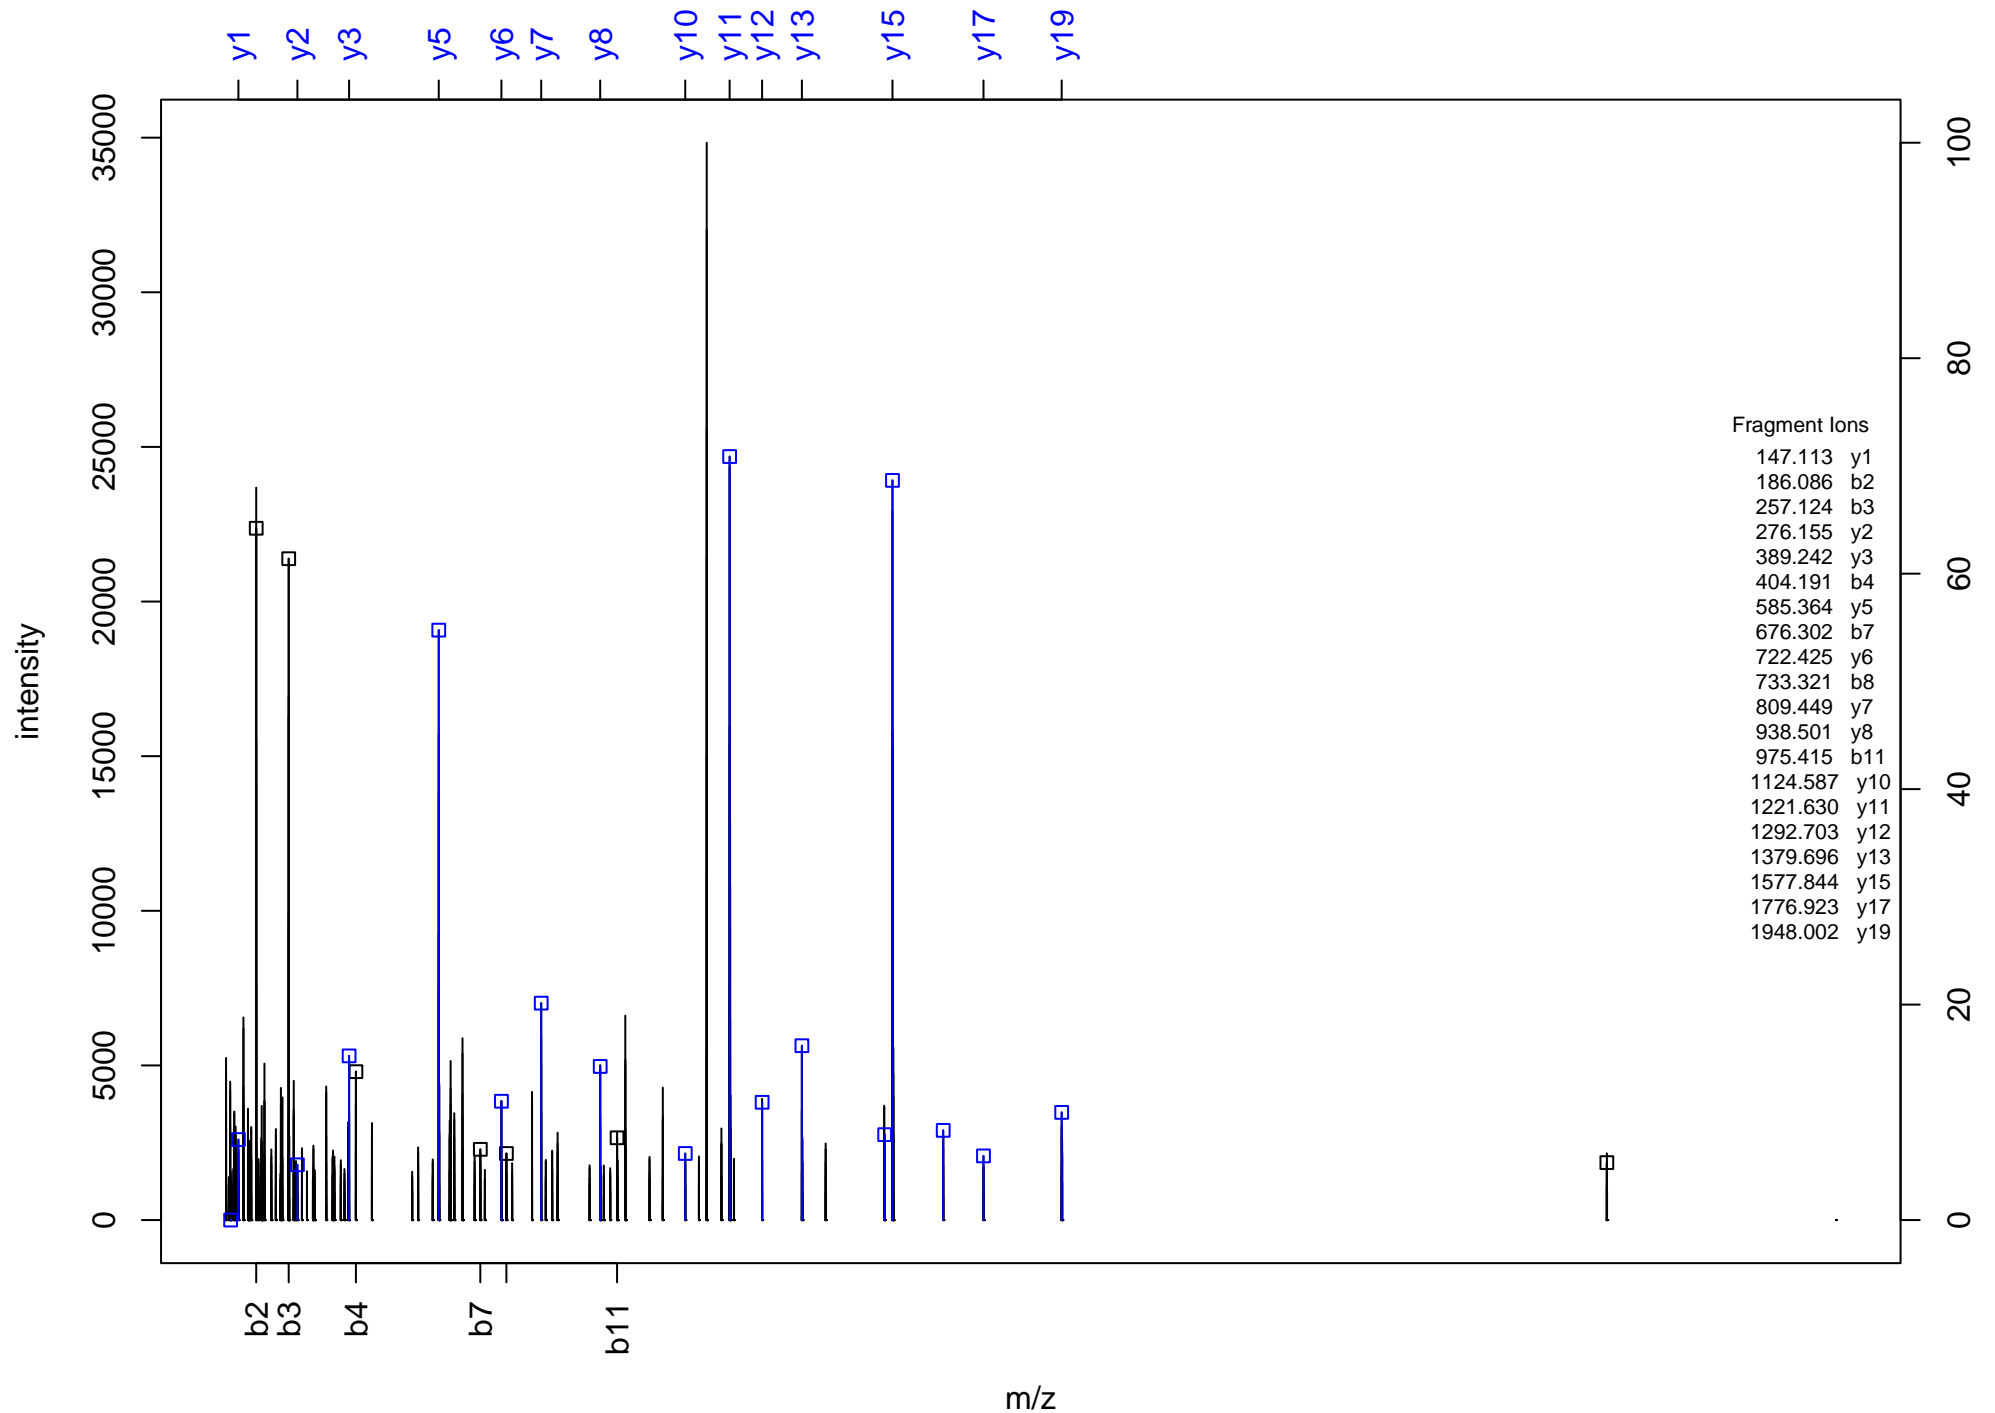

# (Ac)PLRN^VMAEN^NFKMLK

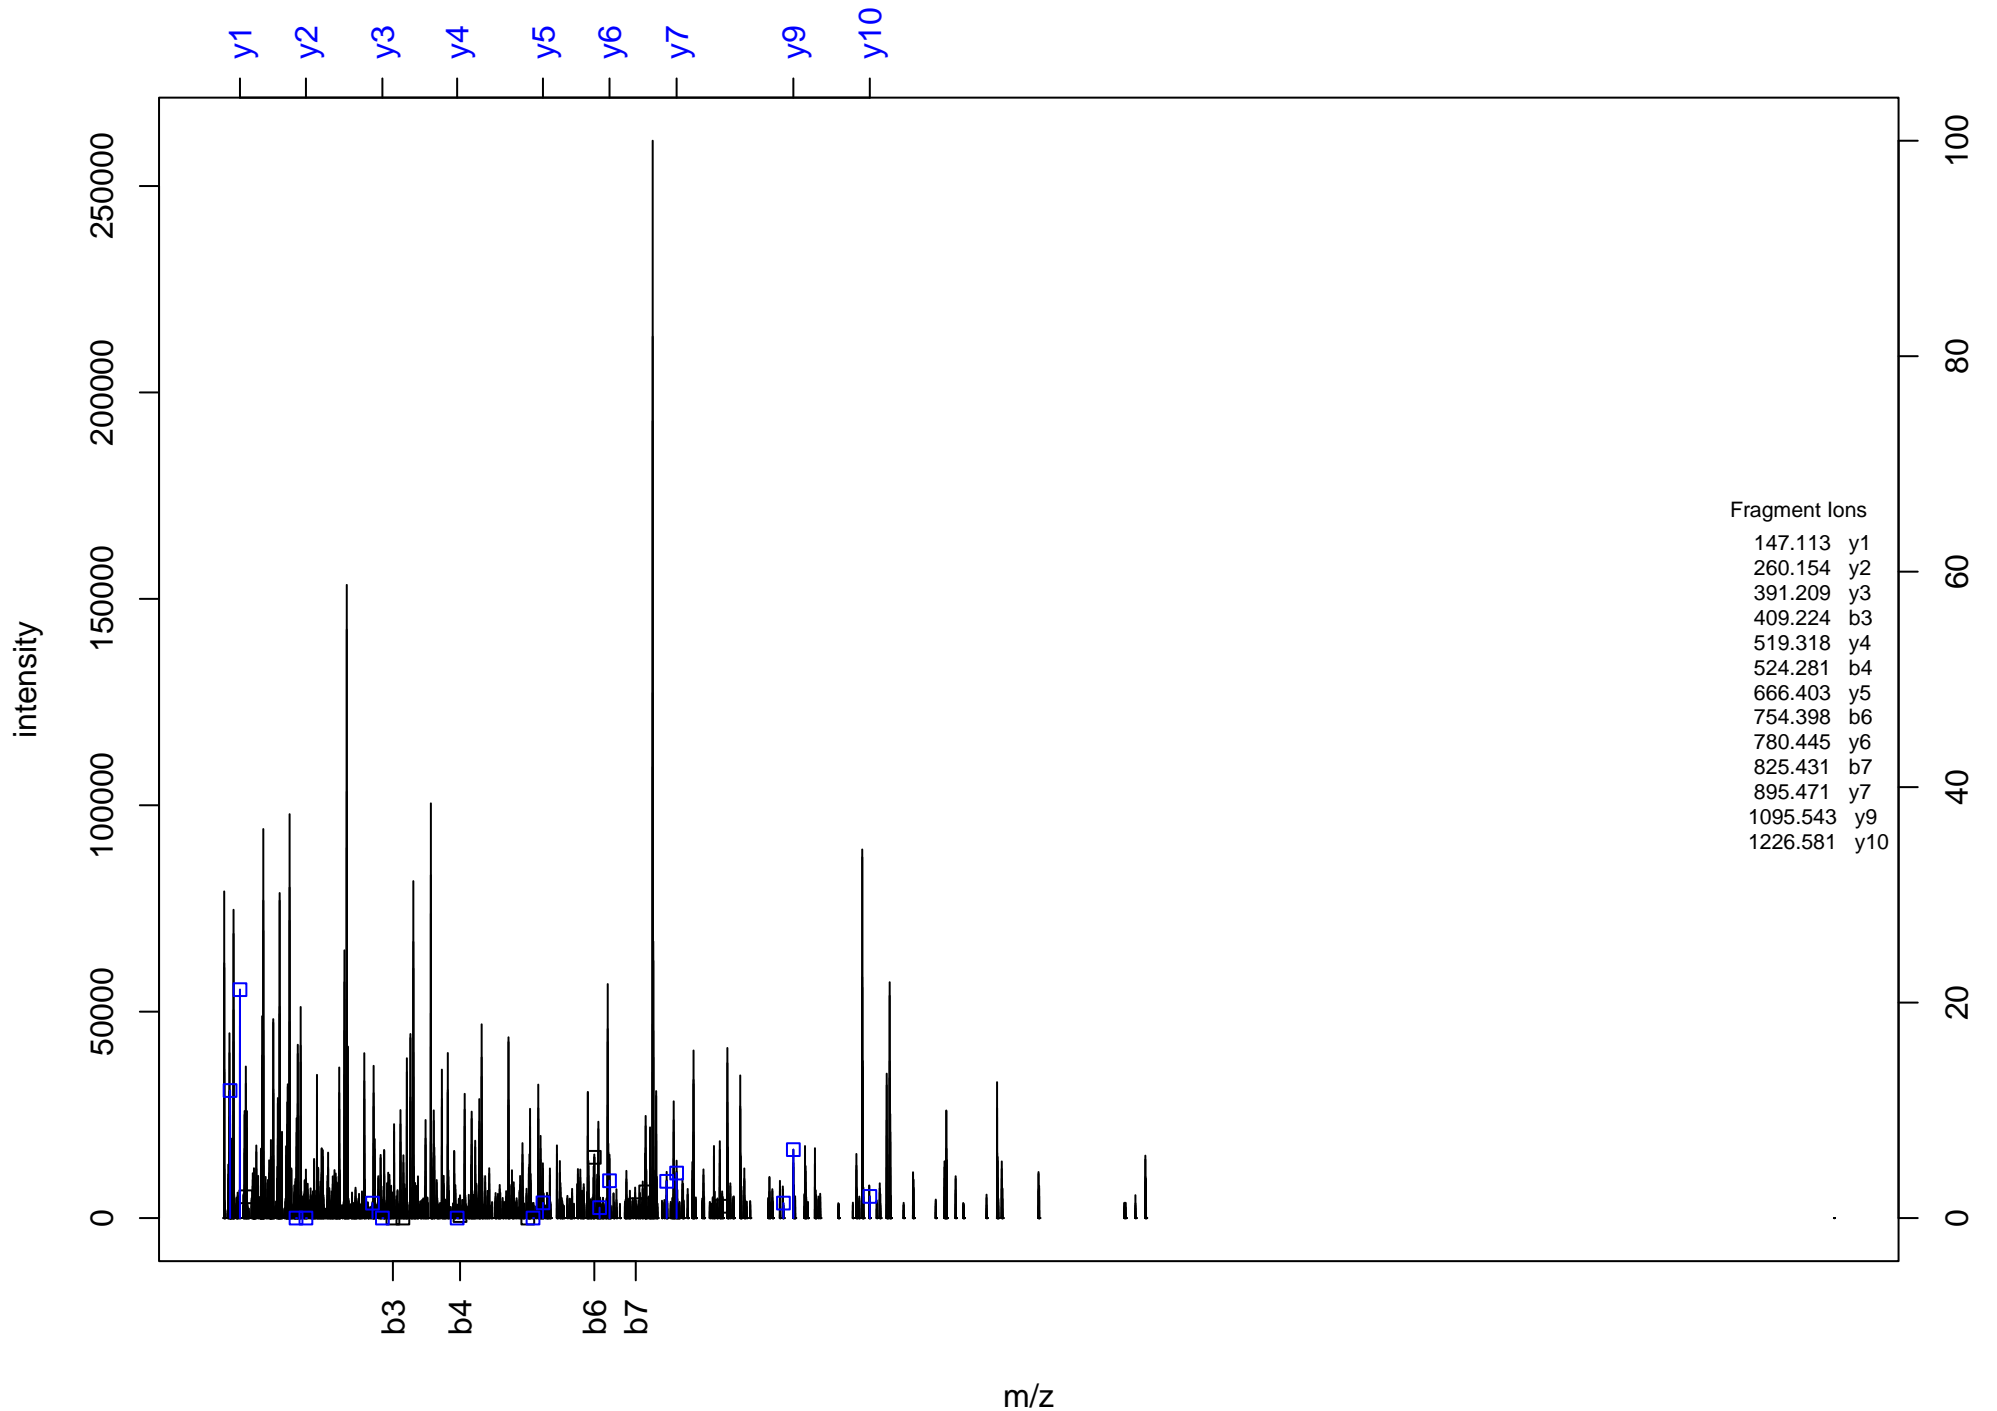

# LYNVQDPETQQNLCR

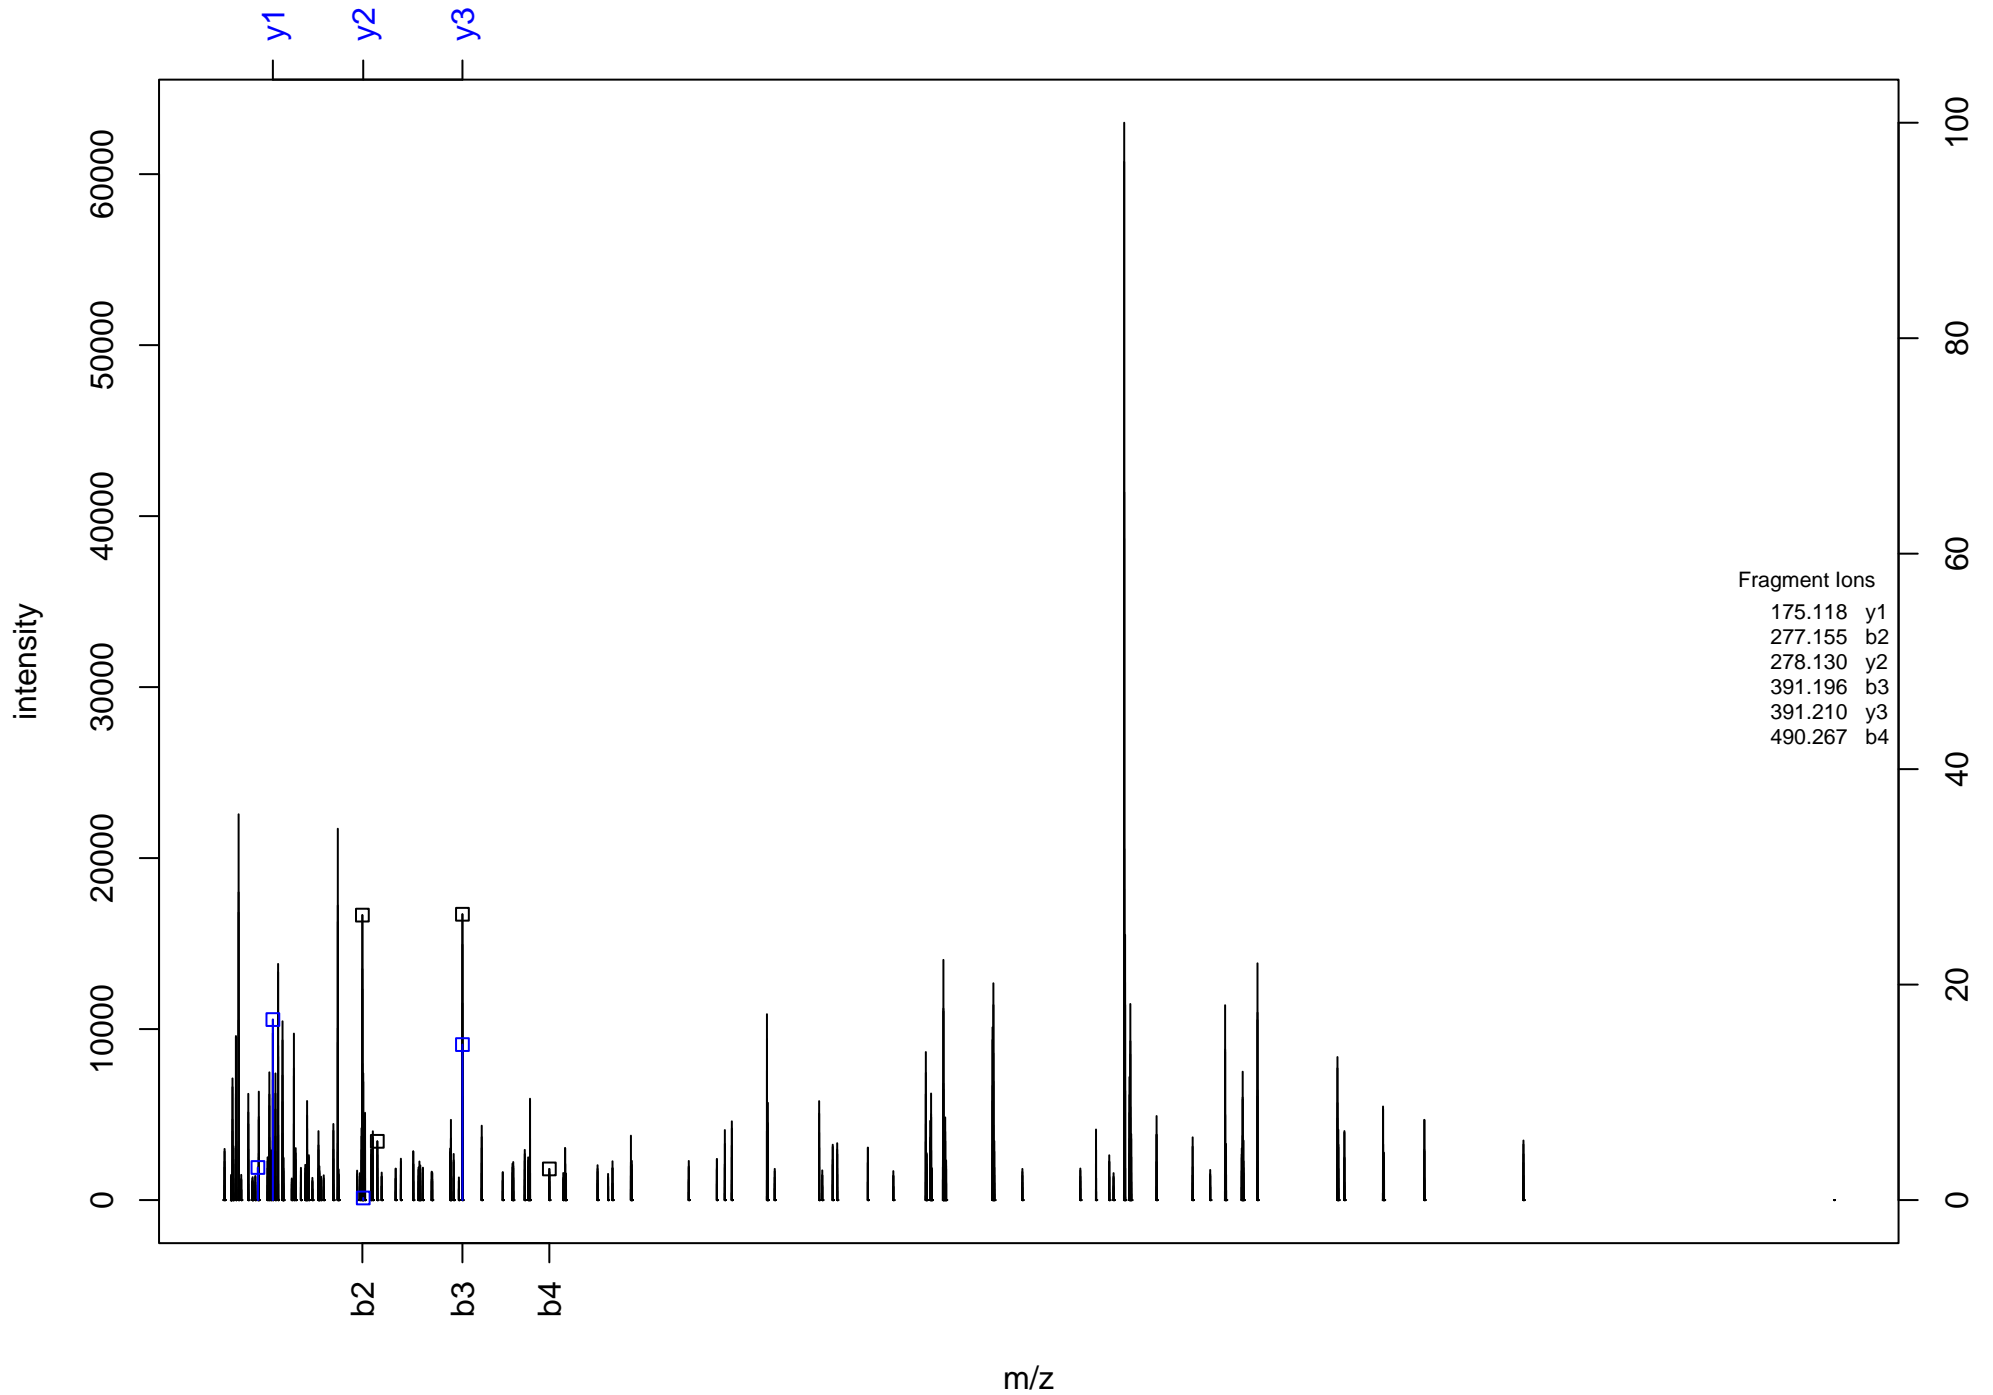

# SLPLQPGMVITVEPGIYIPEDDRDAPEK

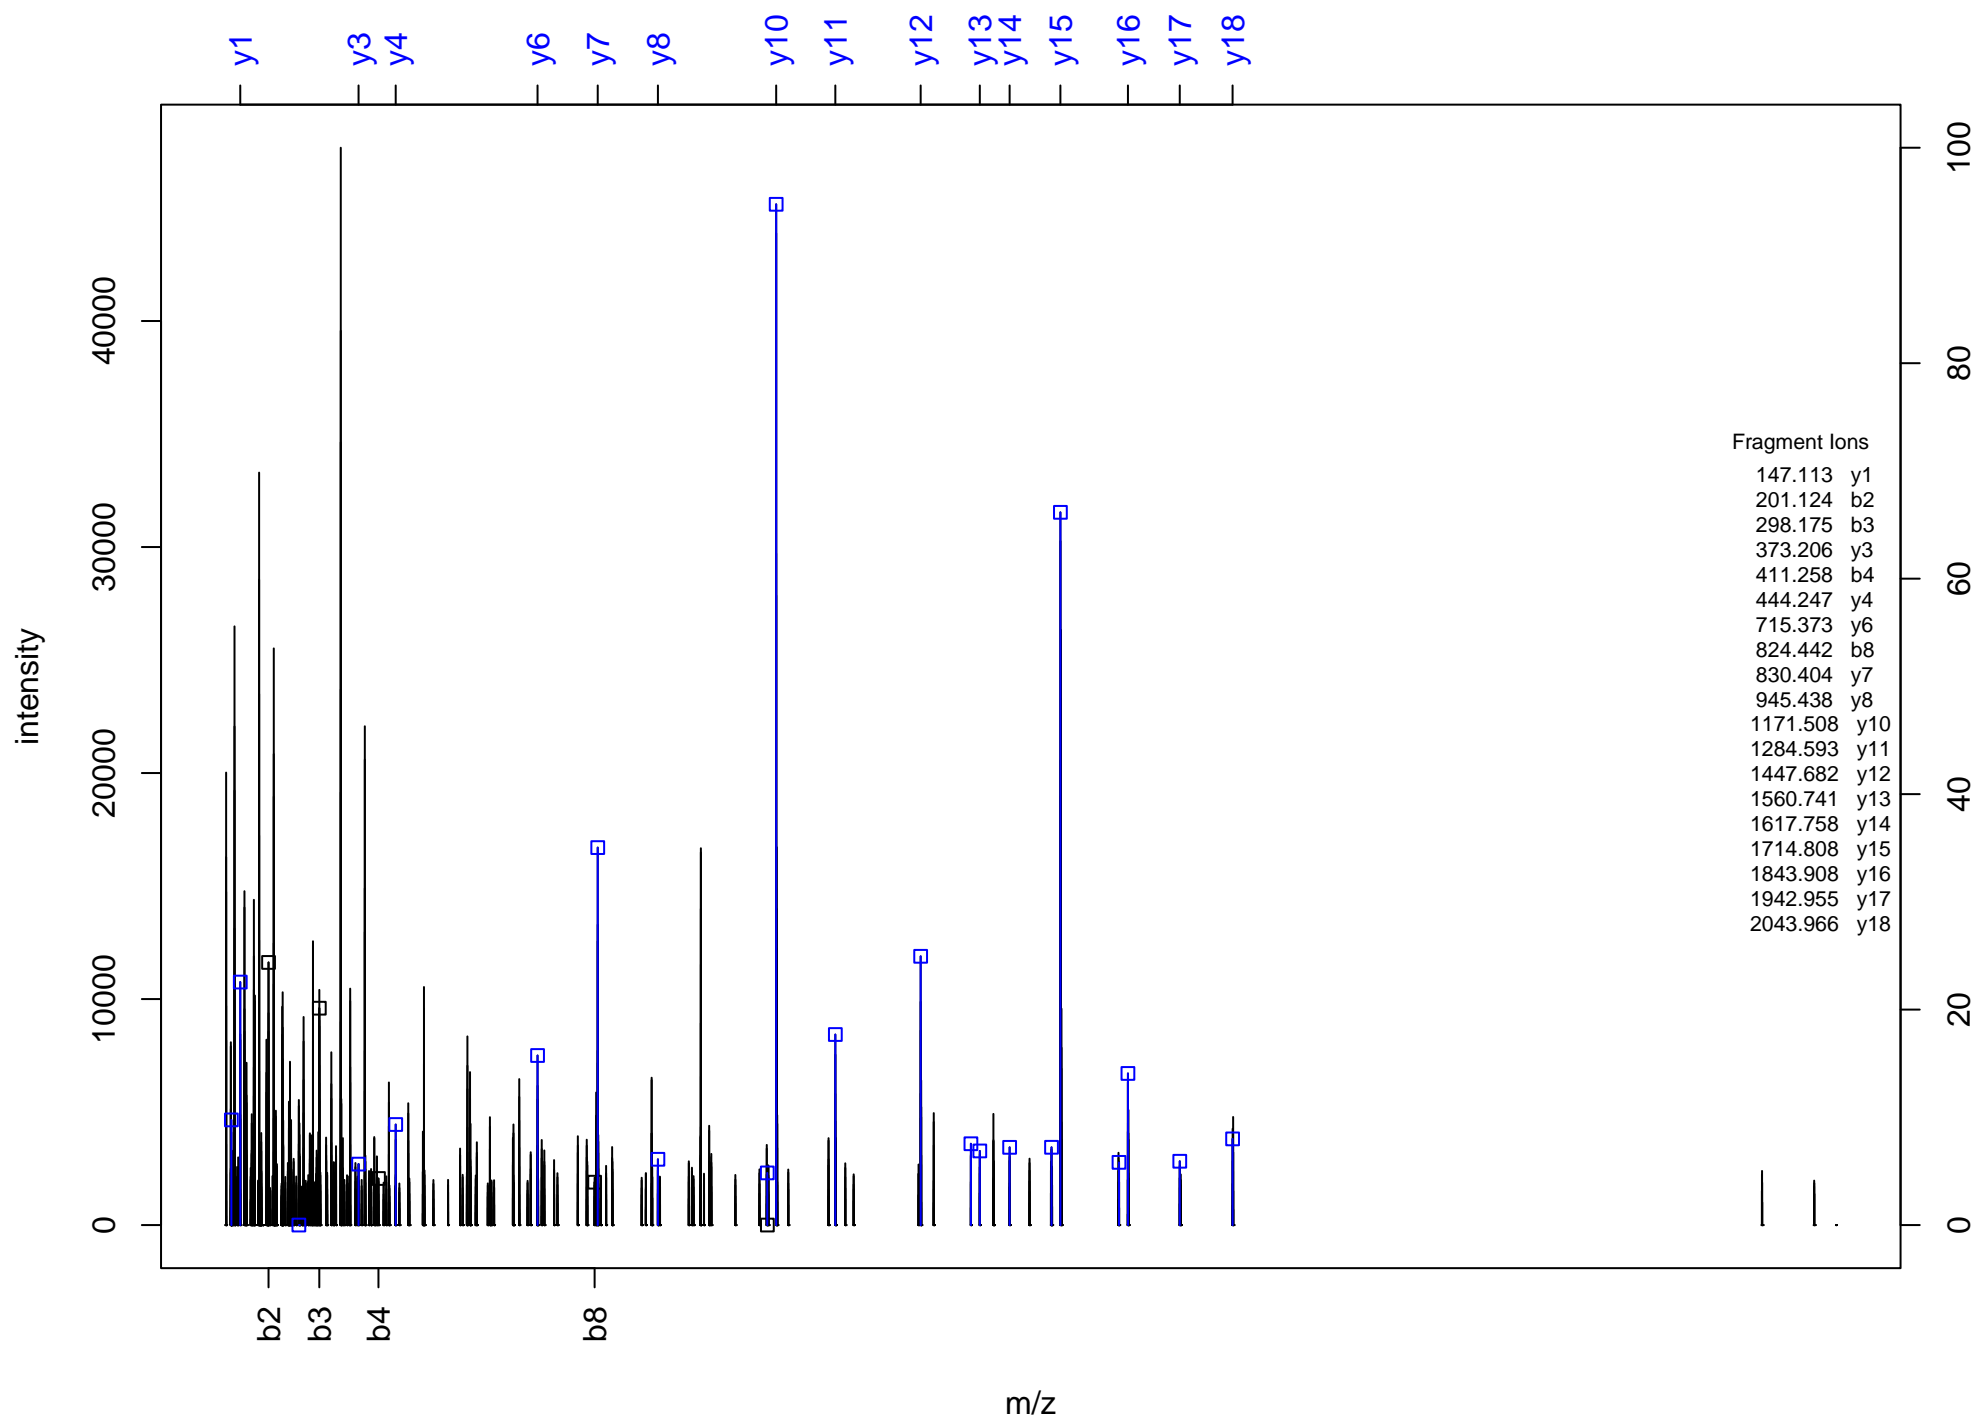

# DQYVSPETVTVR

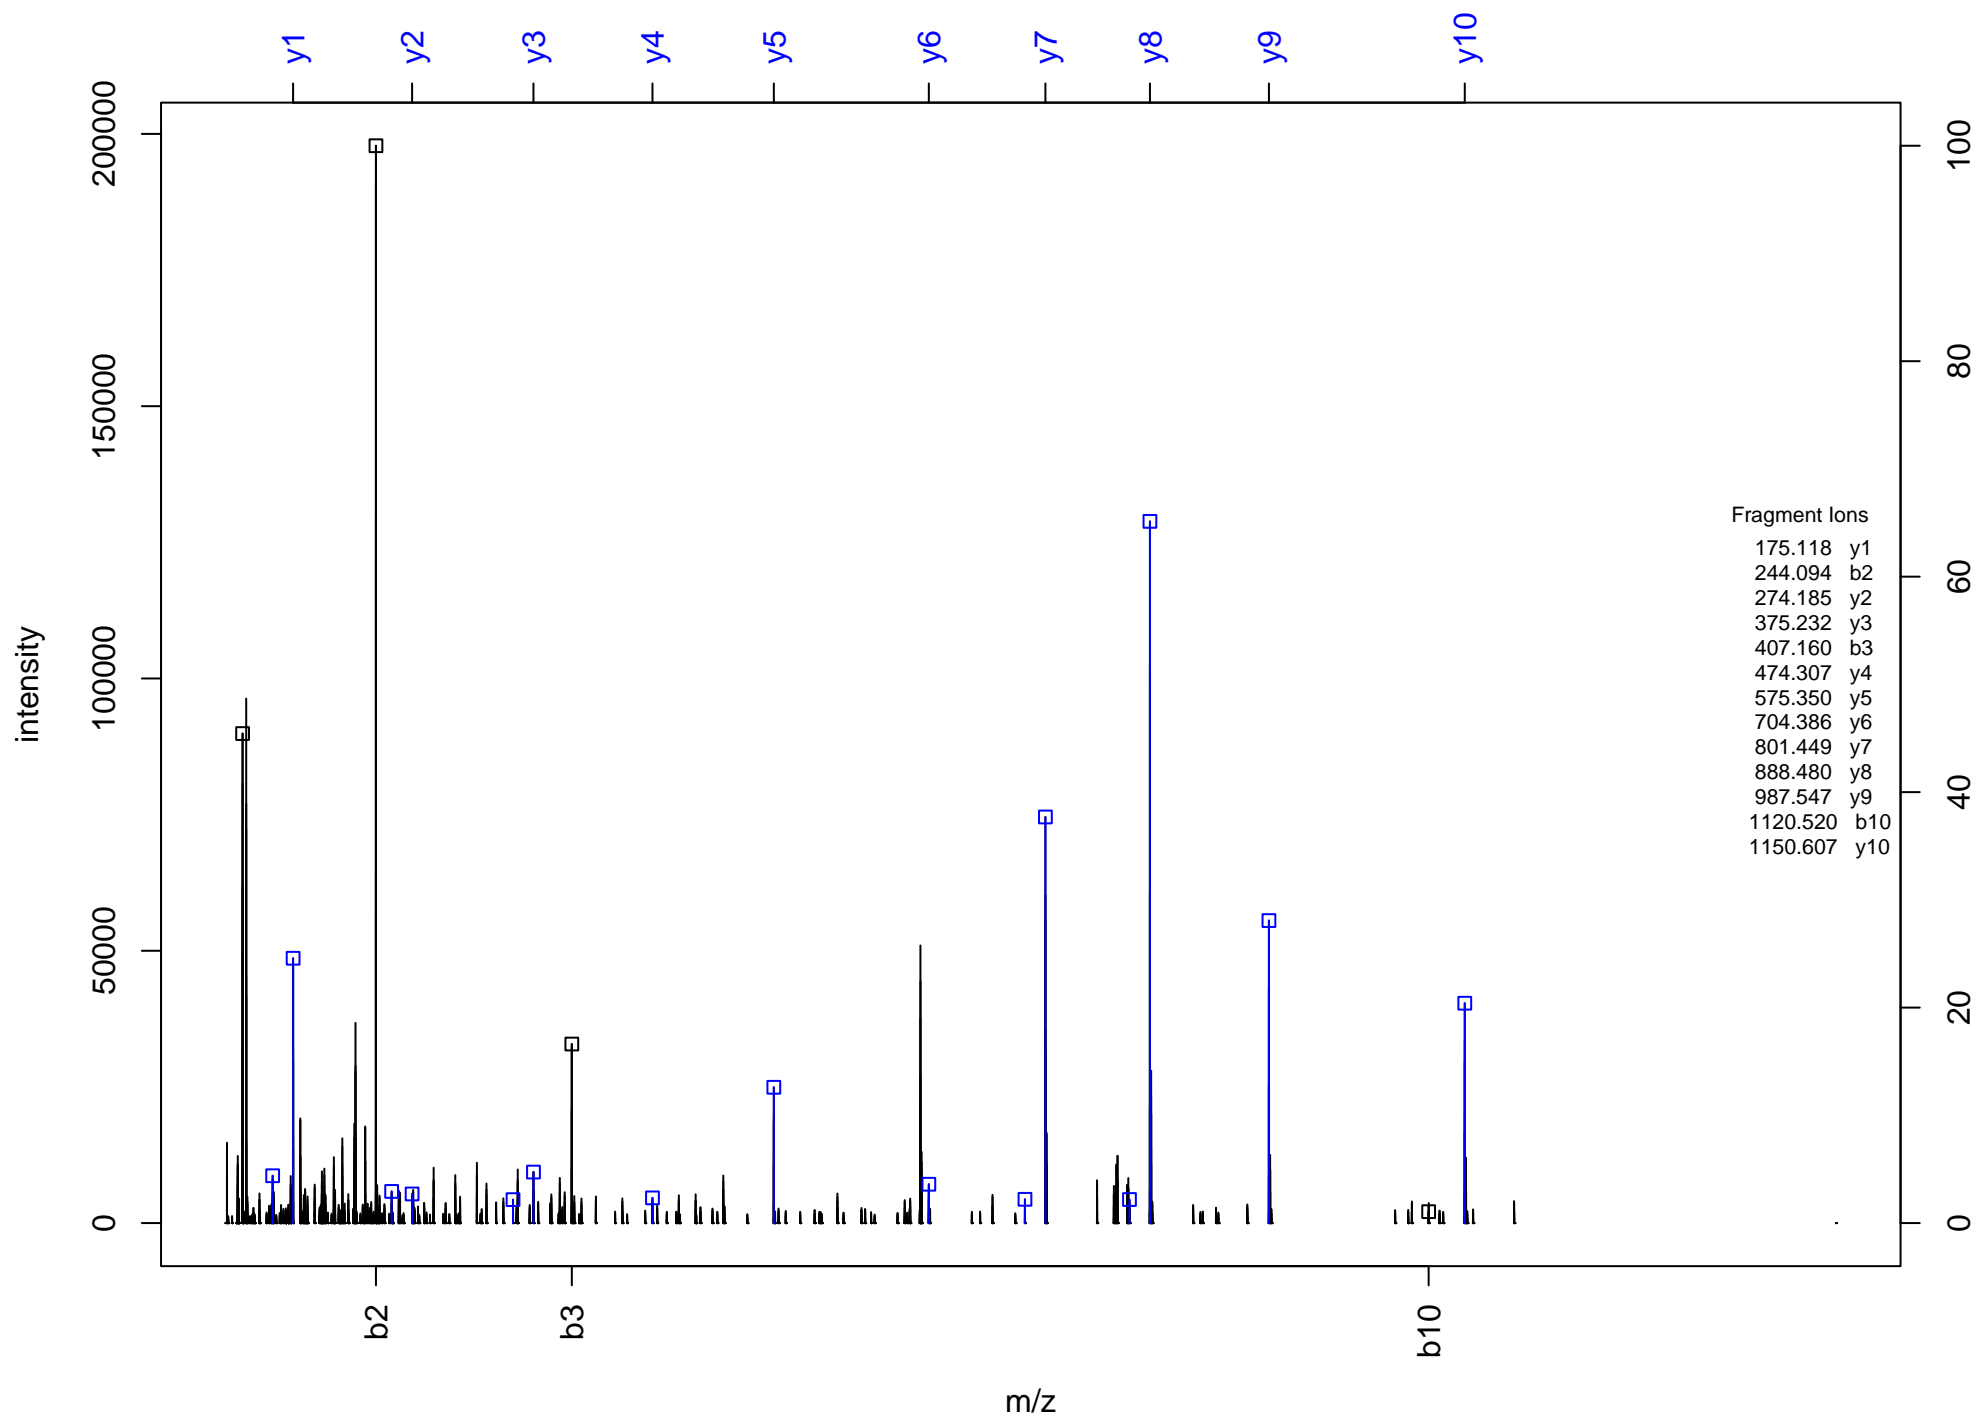

# ILEPPEGQDEGVWK

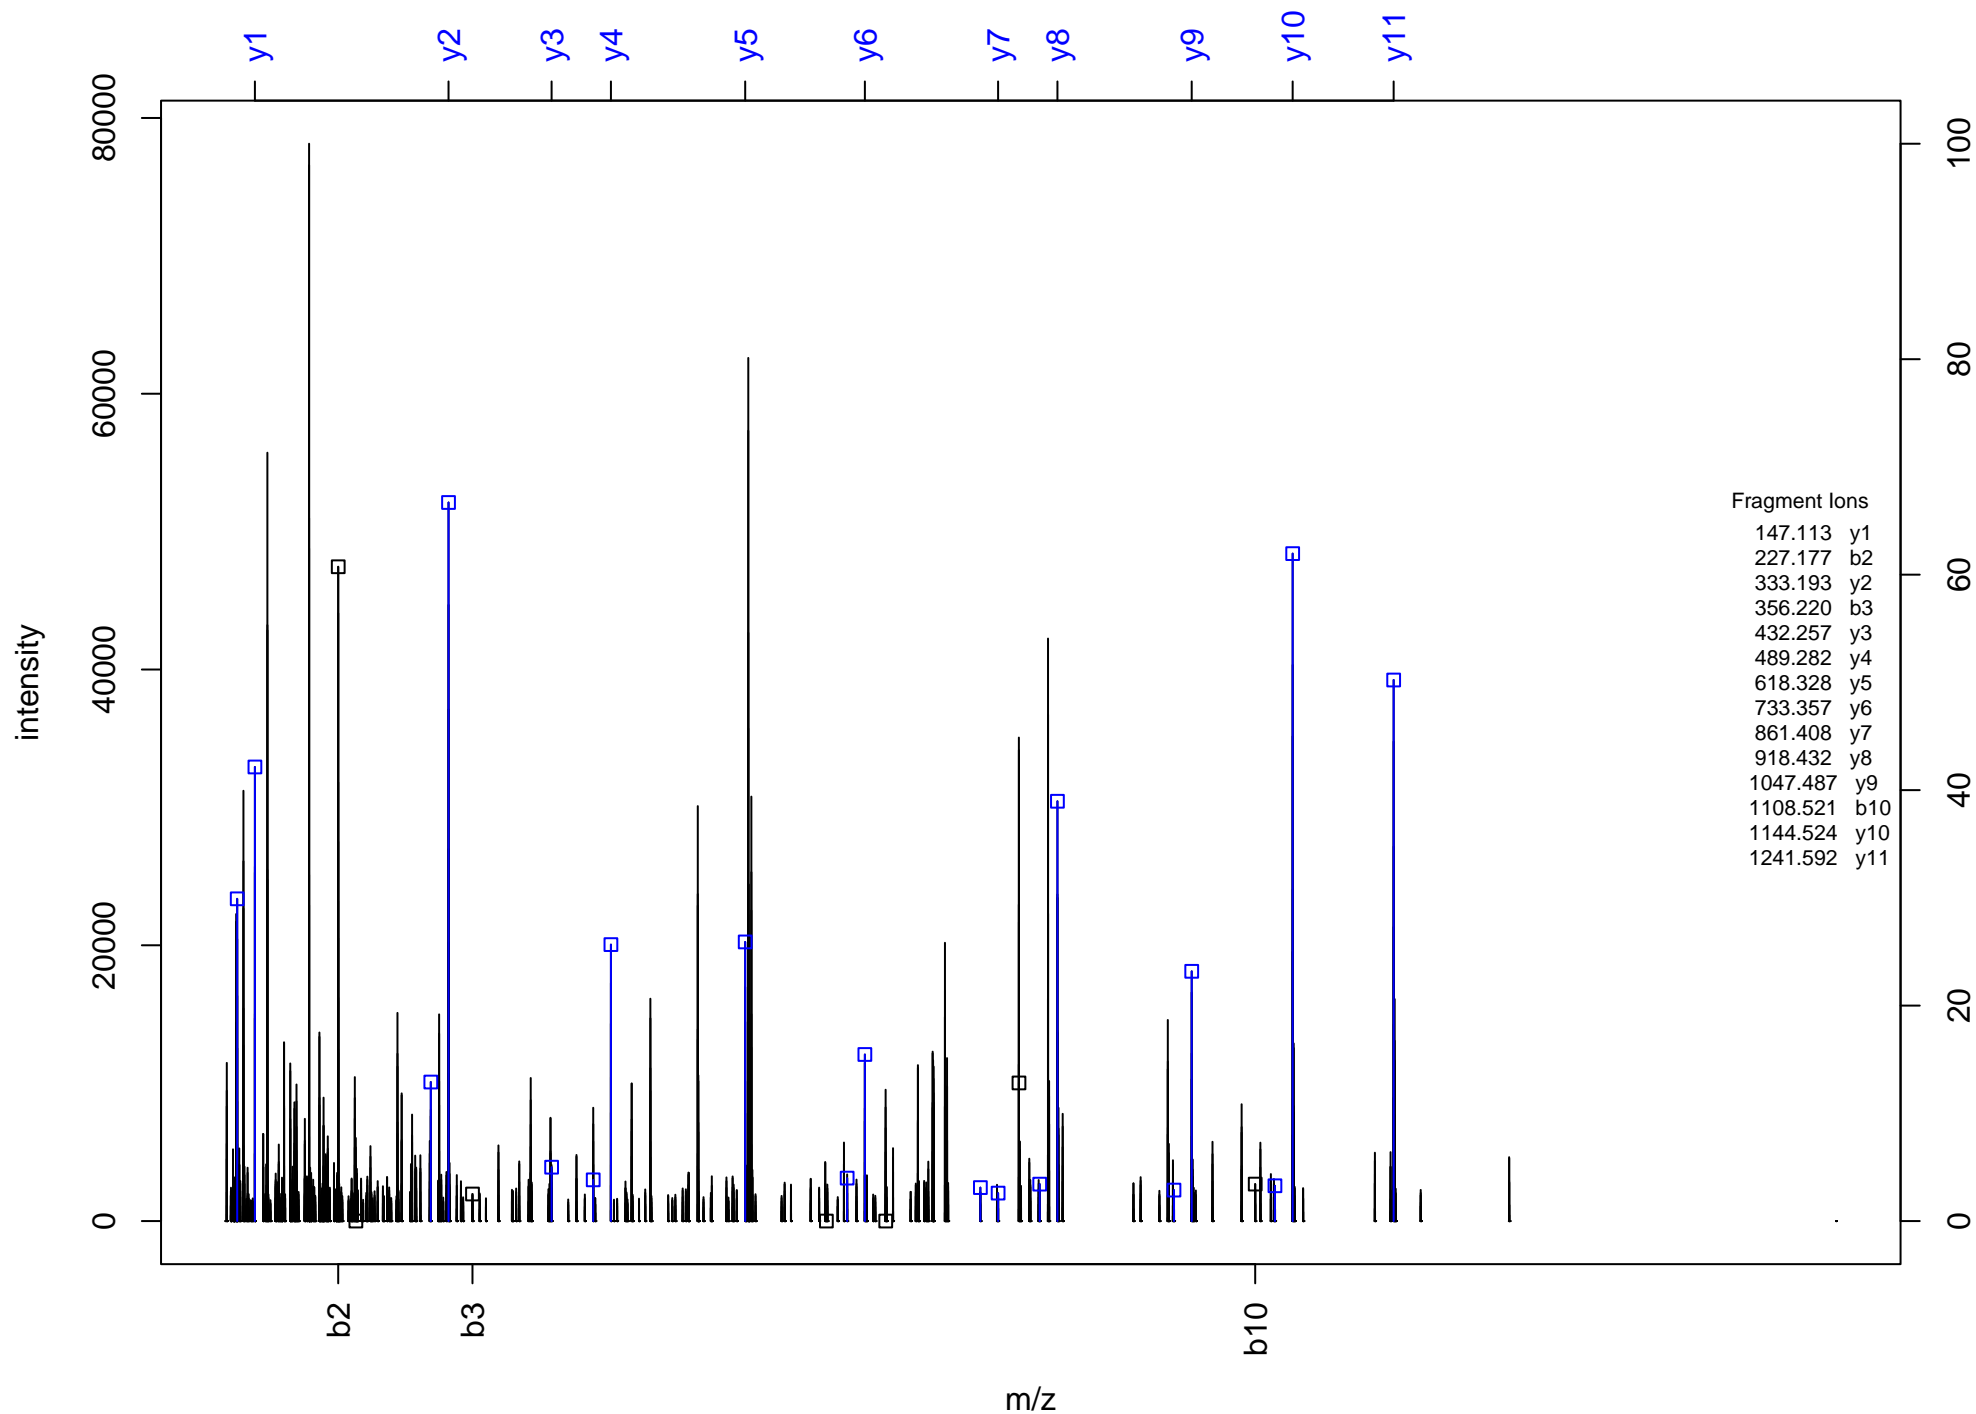

Fragment Ions  
147.113 y1  
227.177 b2  
333.193 y2  
356.220 b3  
432.257 y3  
489.282 y4  
618.328 y5  
733.357 y6  
861.408 y7  
918.432 y8  
1047.487 y9  
1108.521 b10  
1144.524 y10  
1241.592 y11

# (Ac)MDPNCSCASDGSCSCAGACK

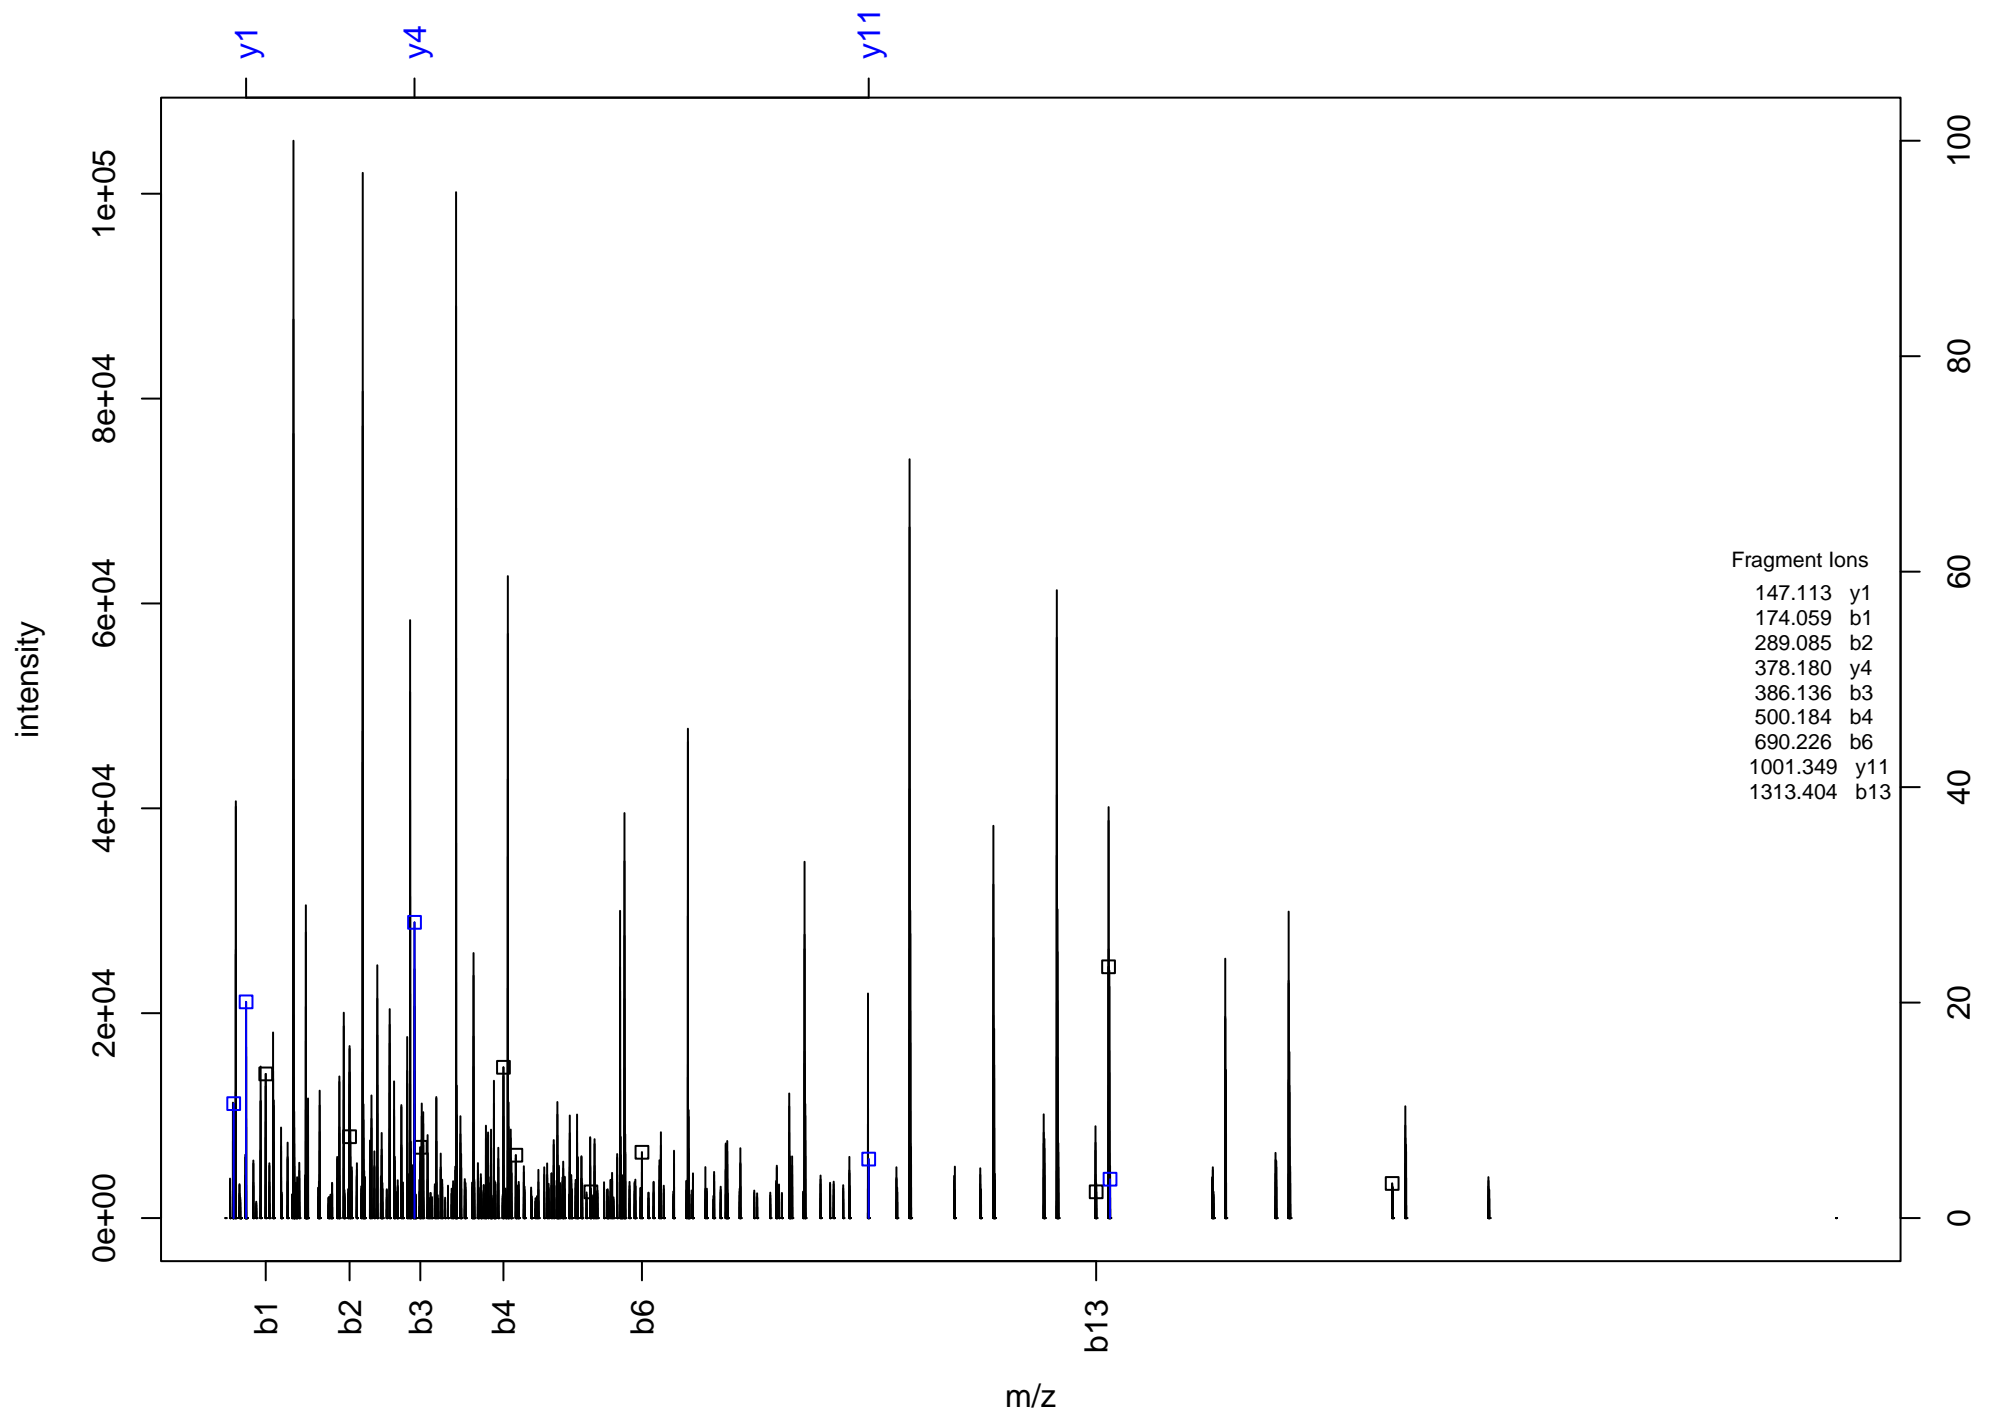

# YSDMIVAAIQAEK

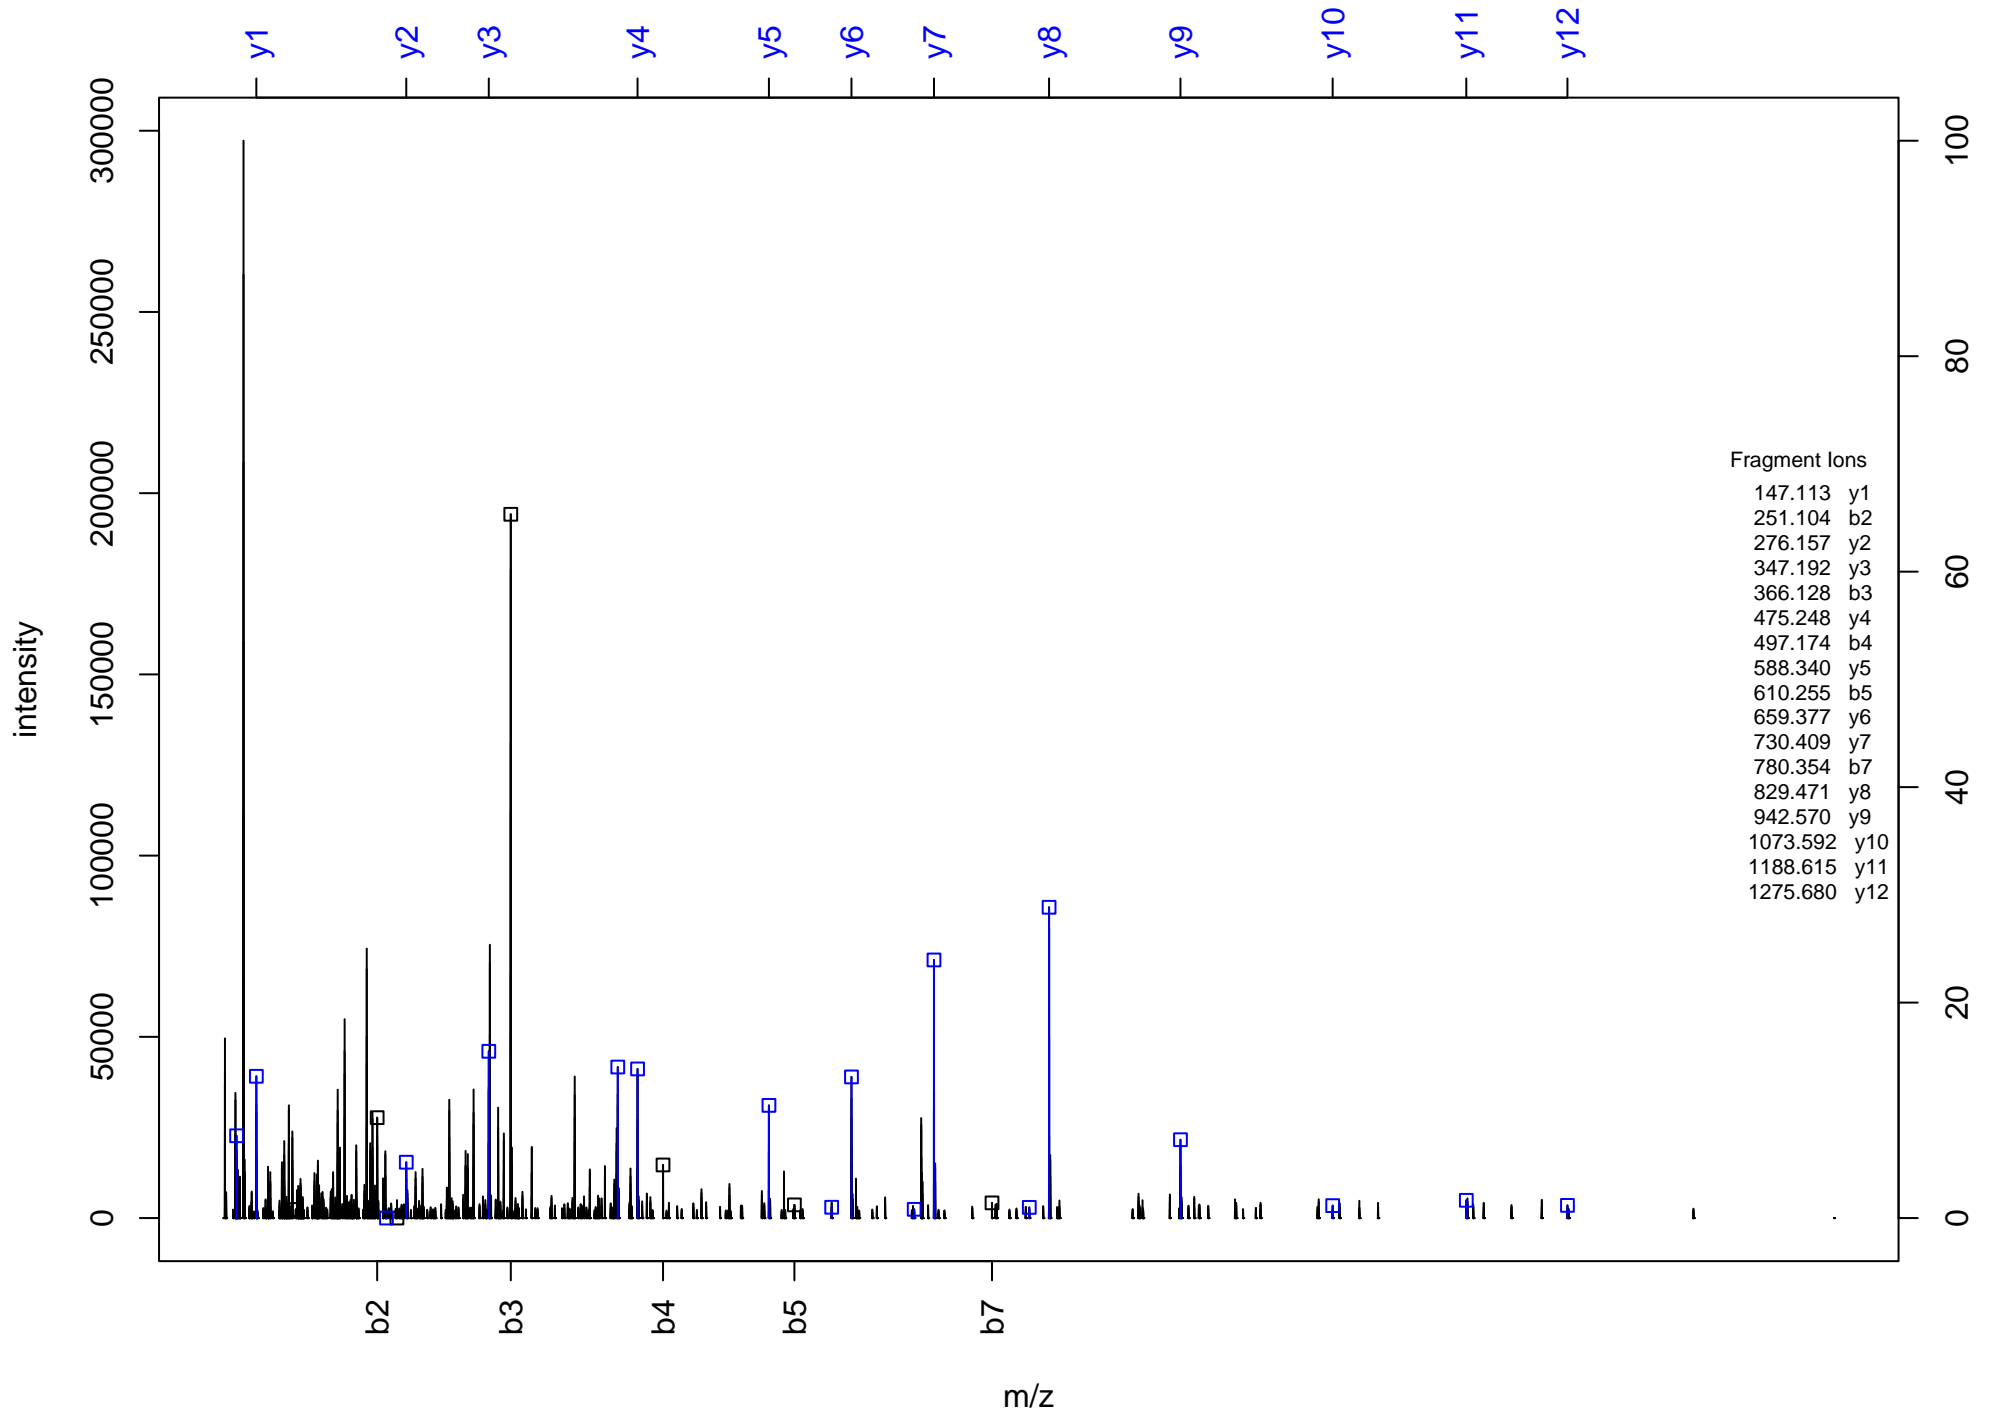



# FGESIANLGDIDNDGFEDIAIGAPQEDDLR

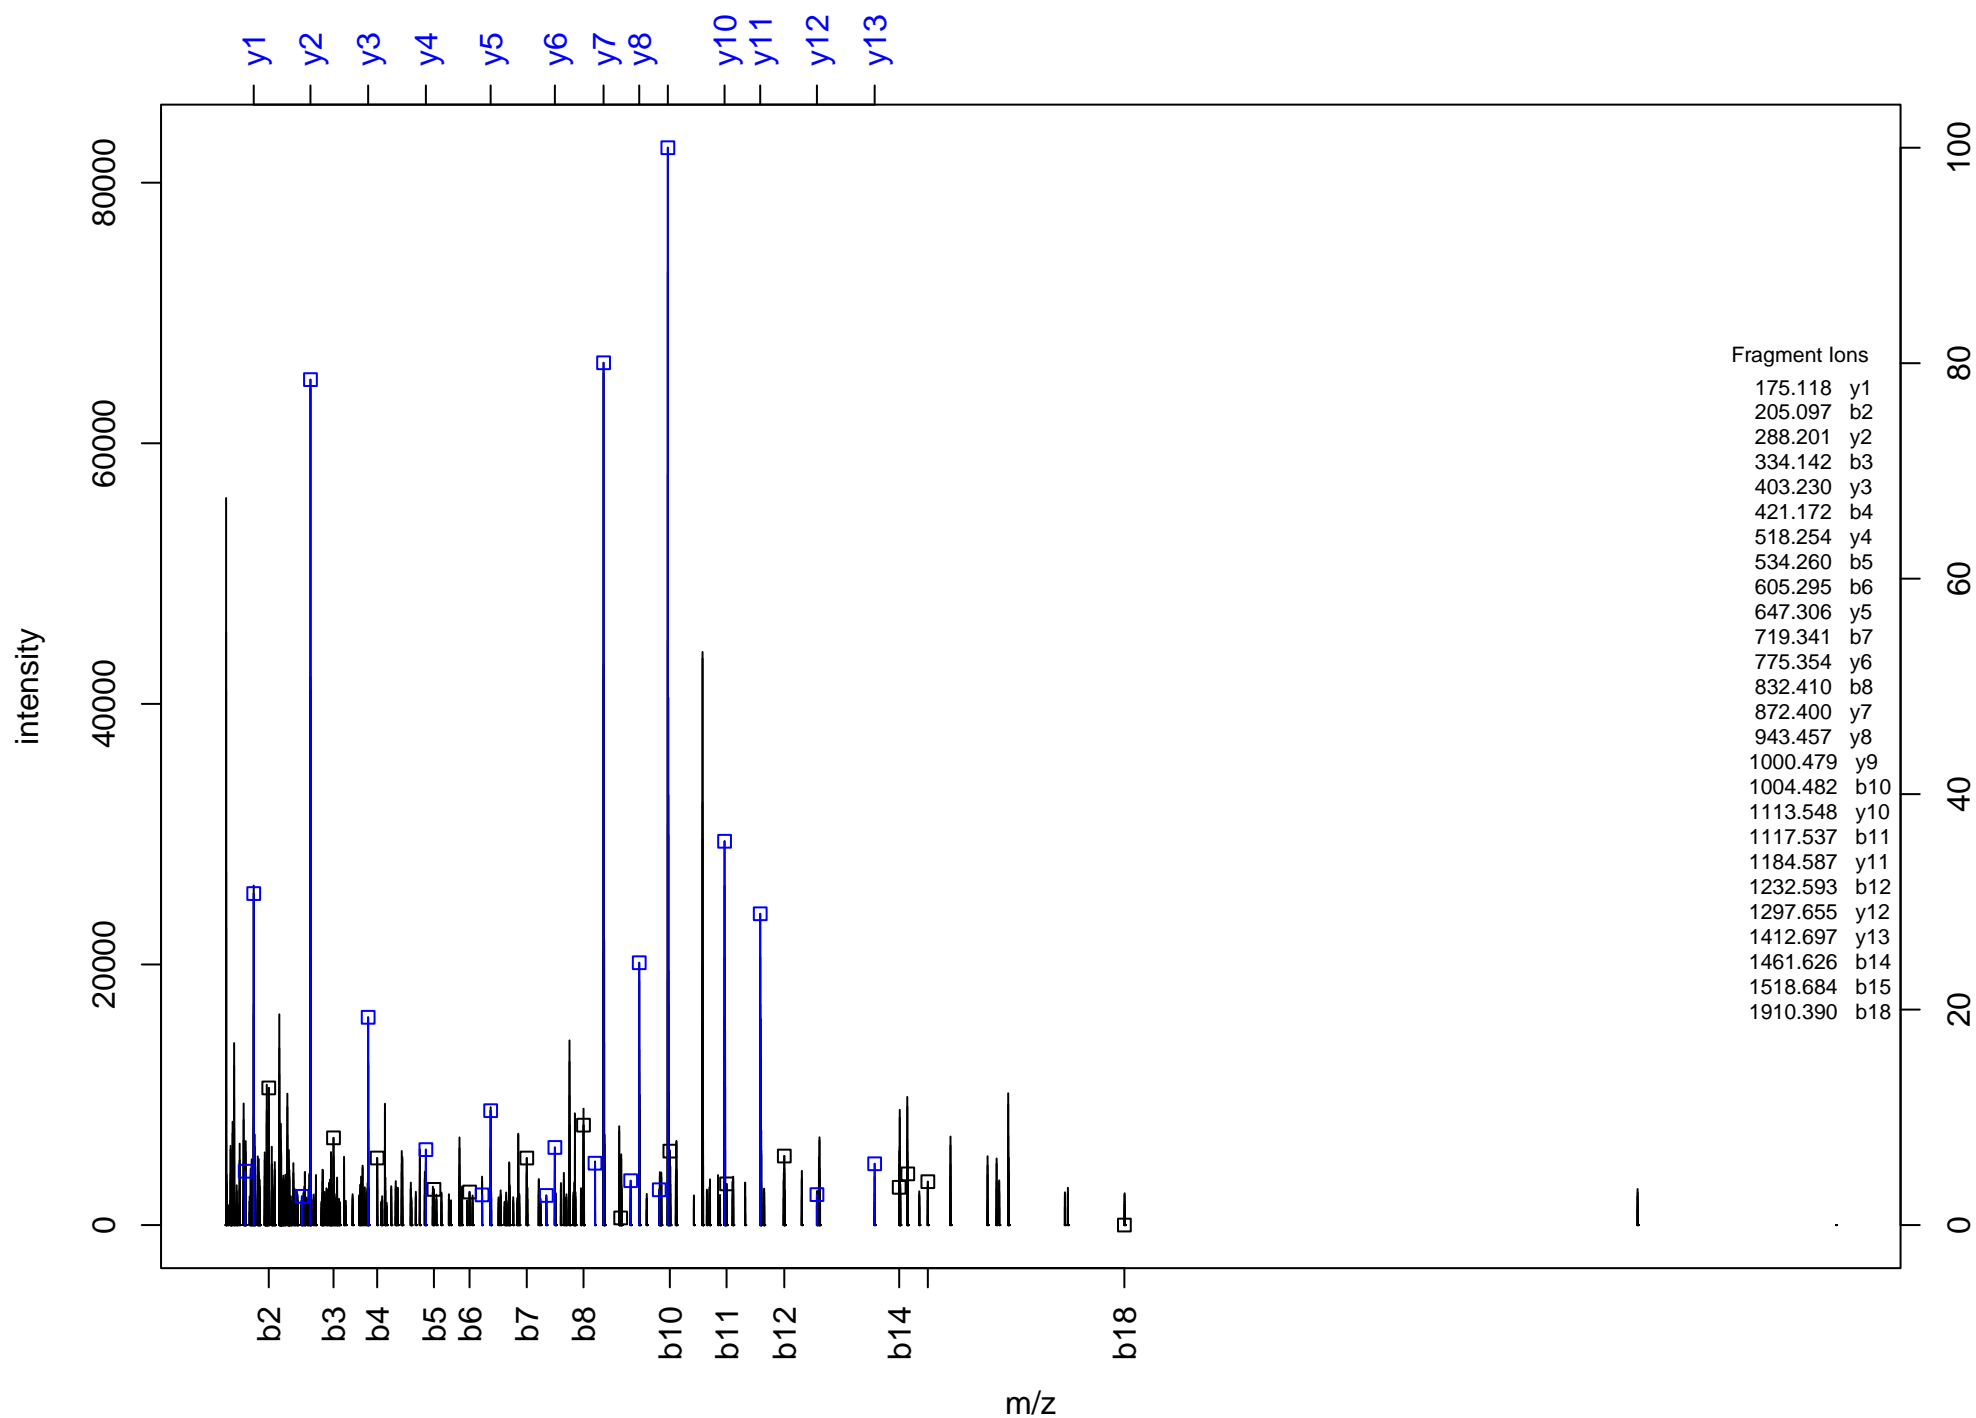

# CDPIDFSNSPEALR

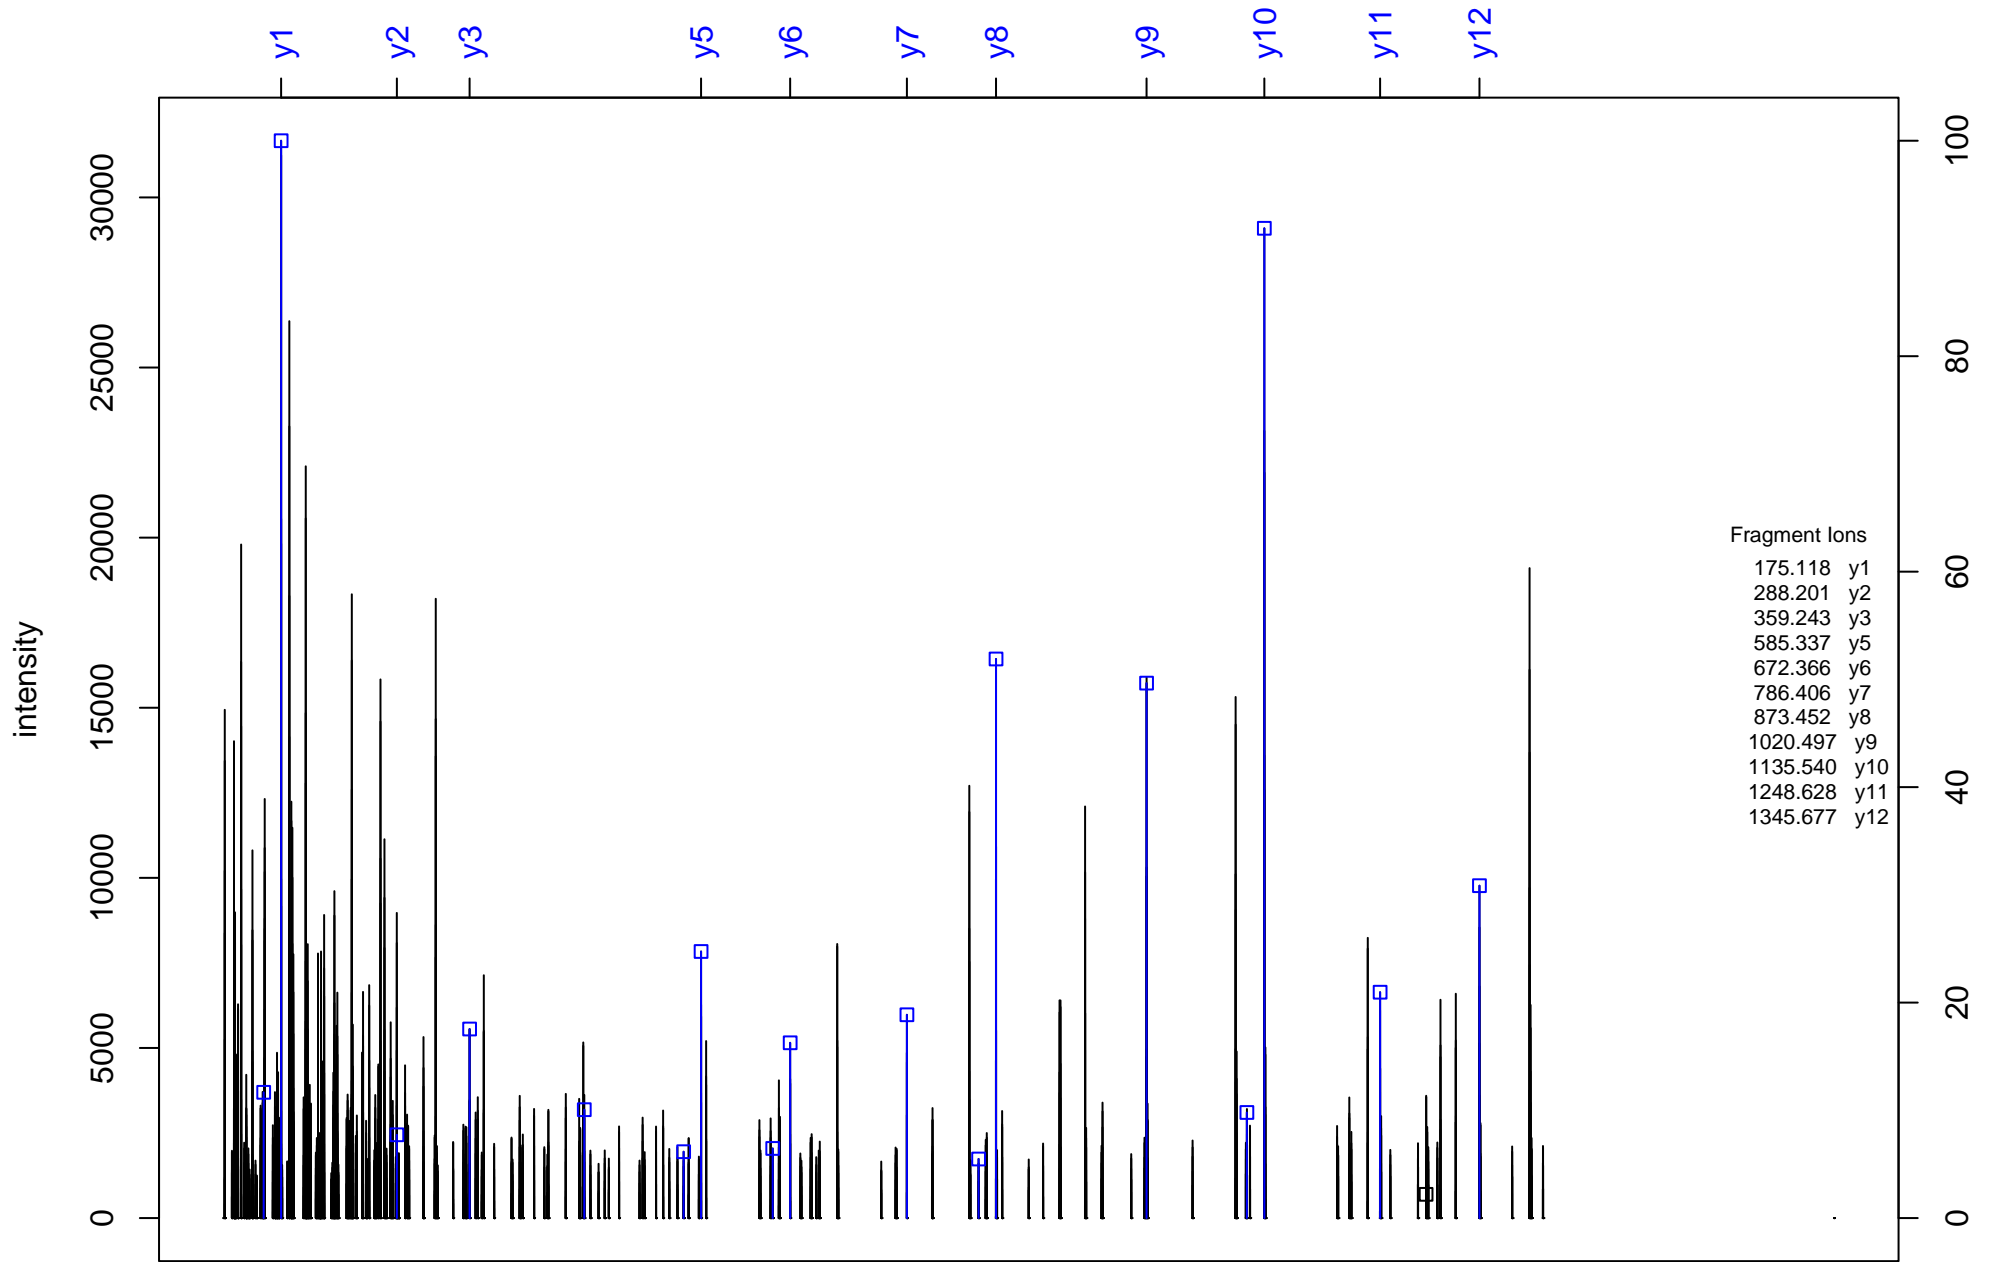

Fragment Ions

|          |     |
|----------|-----|
| 175.118  | y1  |
| 288.201  | y2  |
| 359.243  | y3  |
| 585.337  | y5  |
| 672.366  | y6  |
| 786.406  | y7  |
| 873.452  | y8  |
| 1020.497 | y9  |
| 1135.540 | y10 |
| 1248.628 | y11 |
| 1345.677 | y12 |

# YQPLDQVVDDTFPDCTLLLR

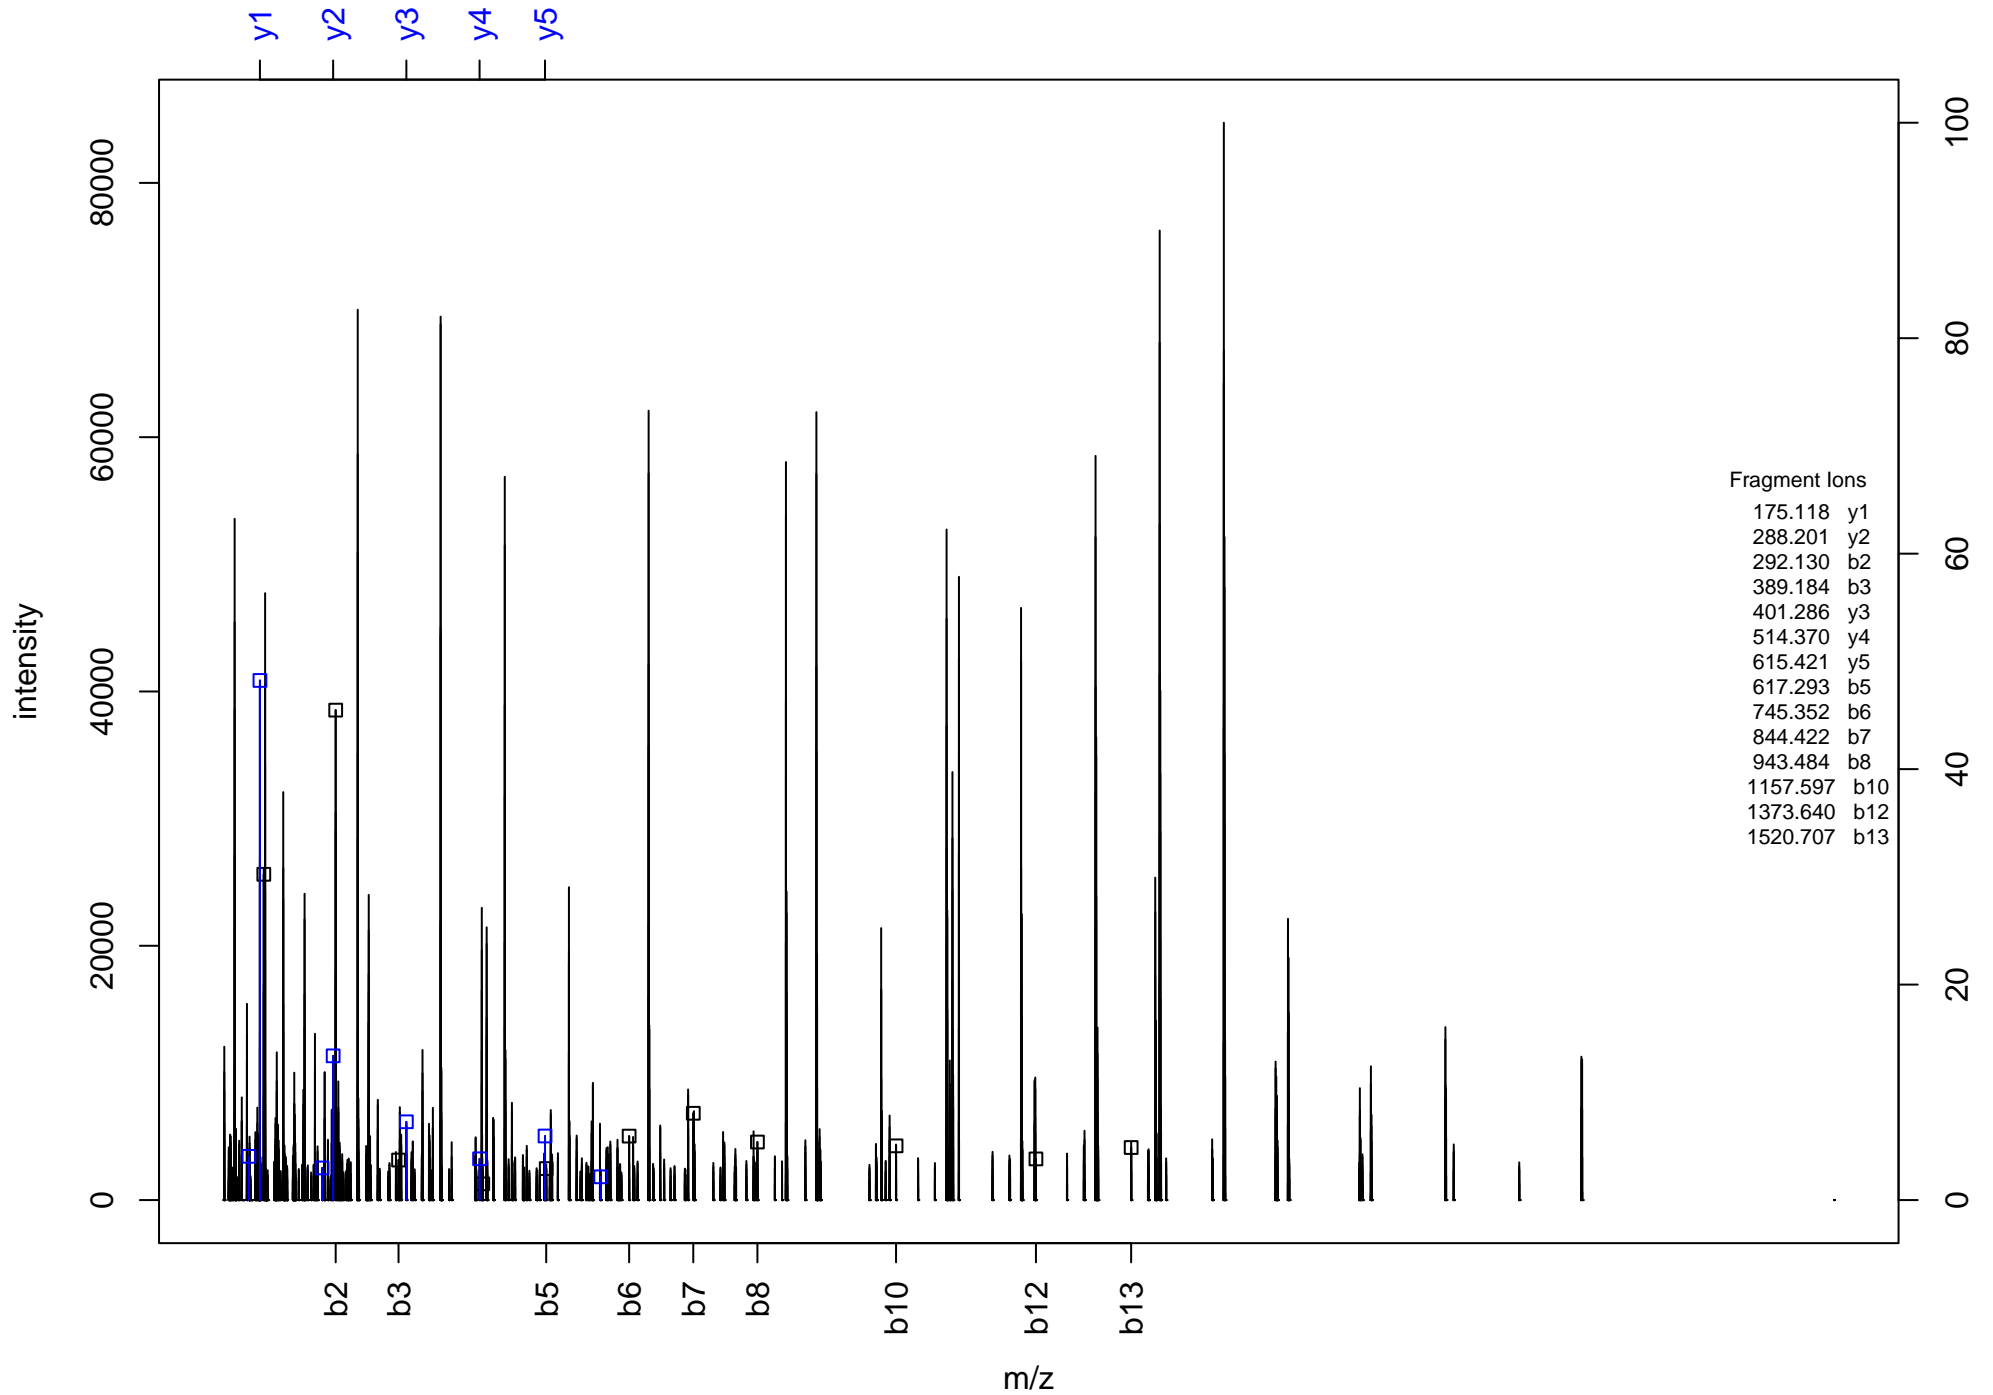

# FEMPVLDSFVEK

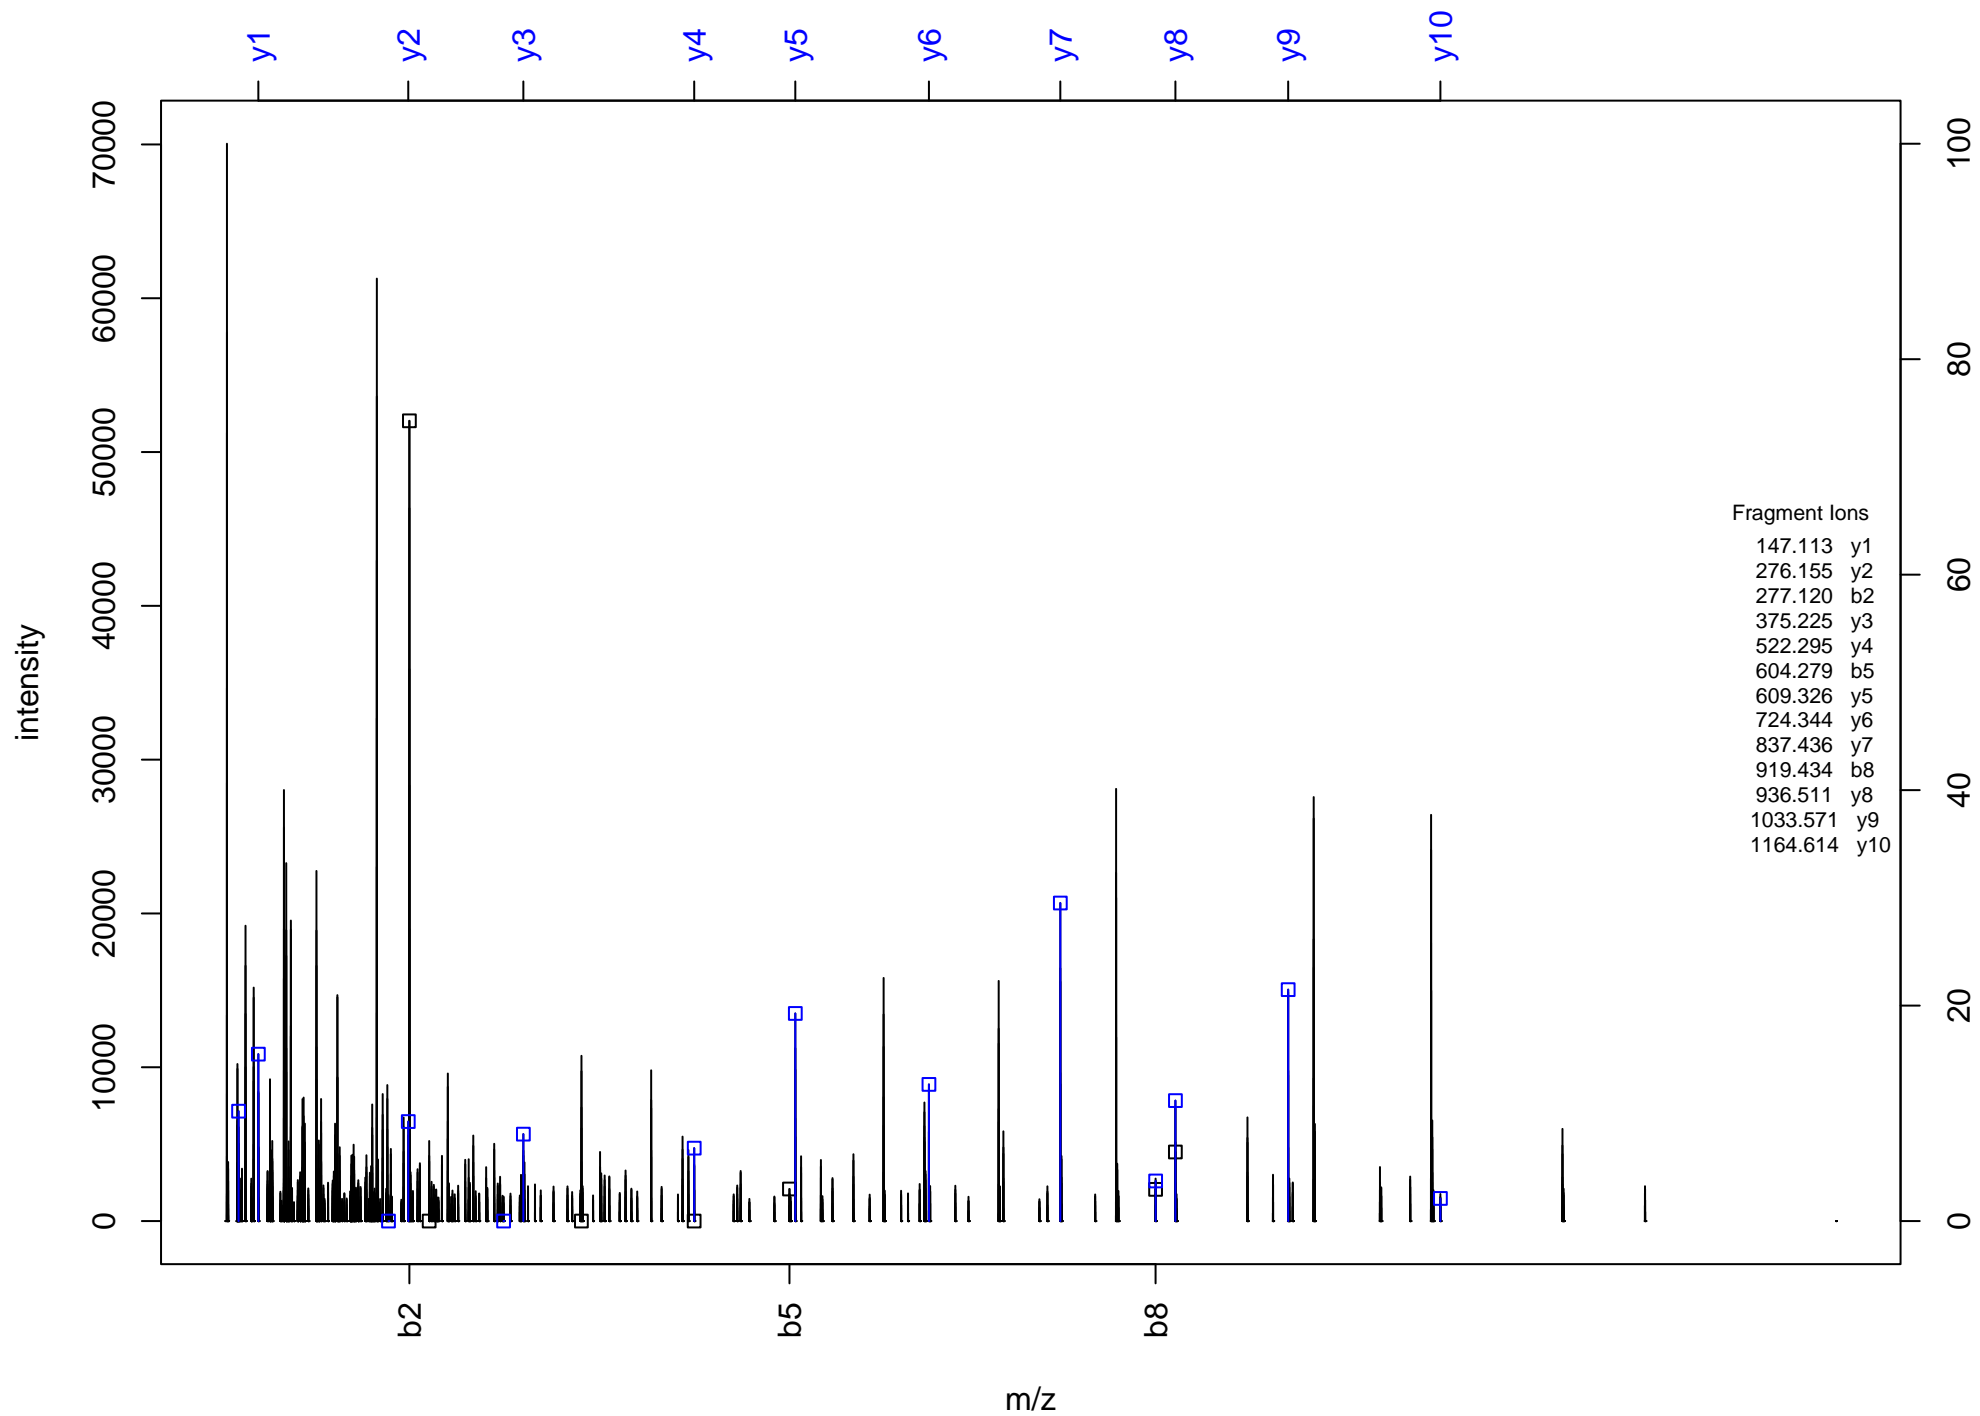

# NNDGYIDYAEFAK

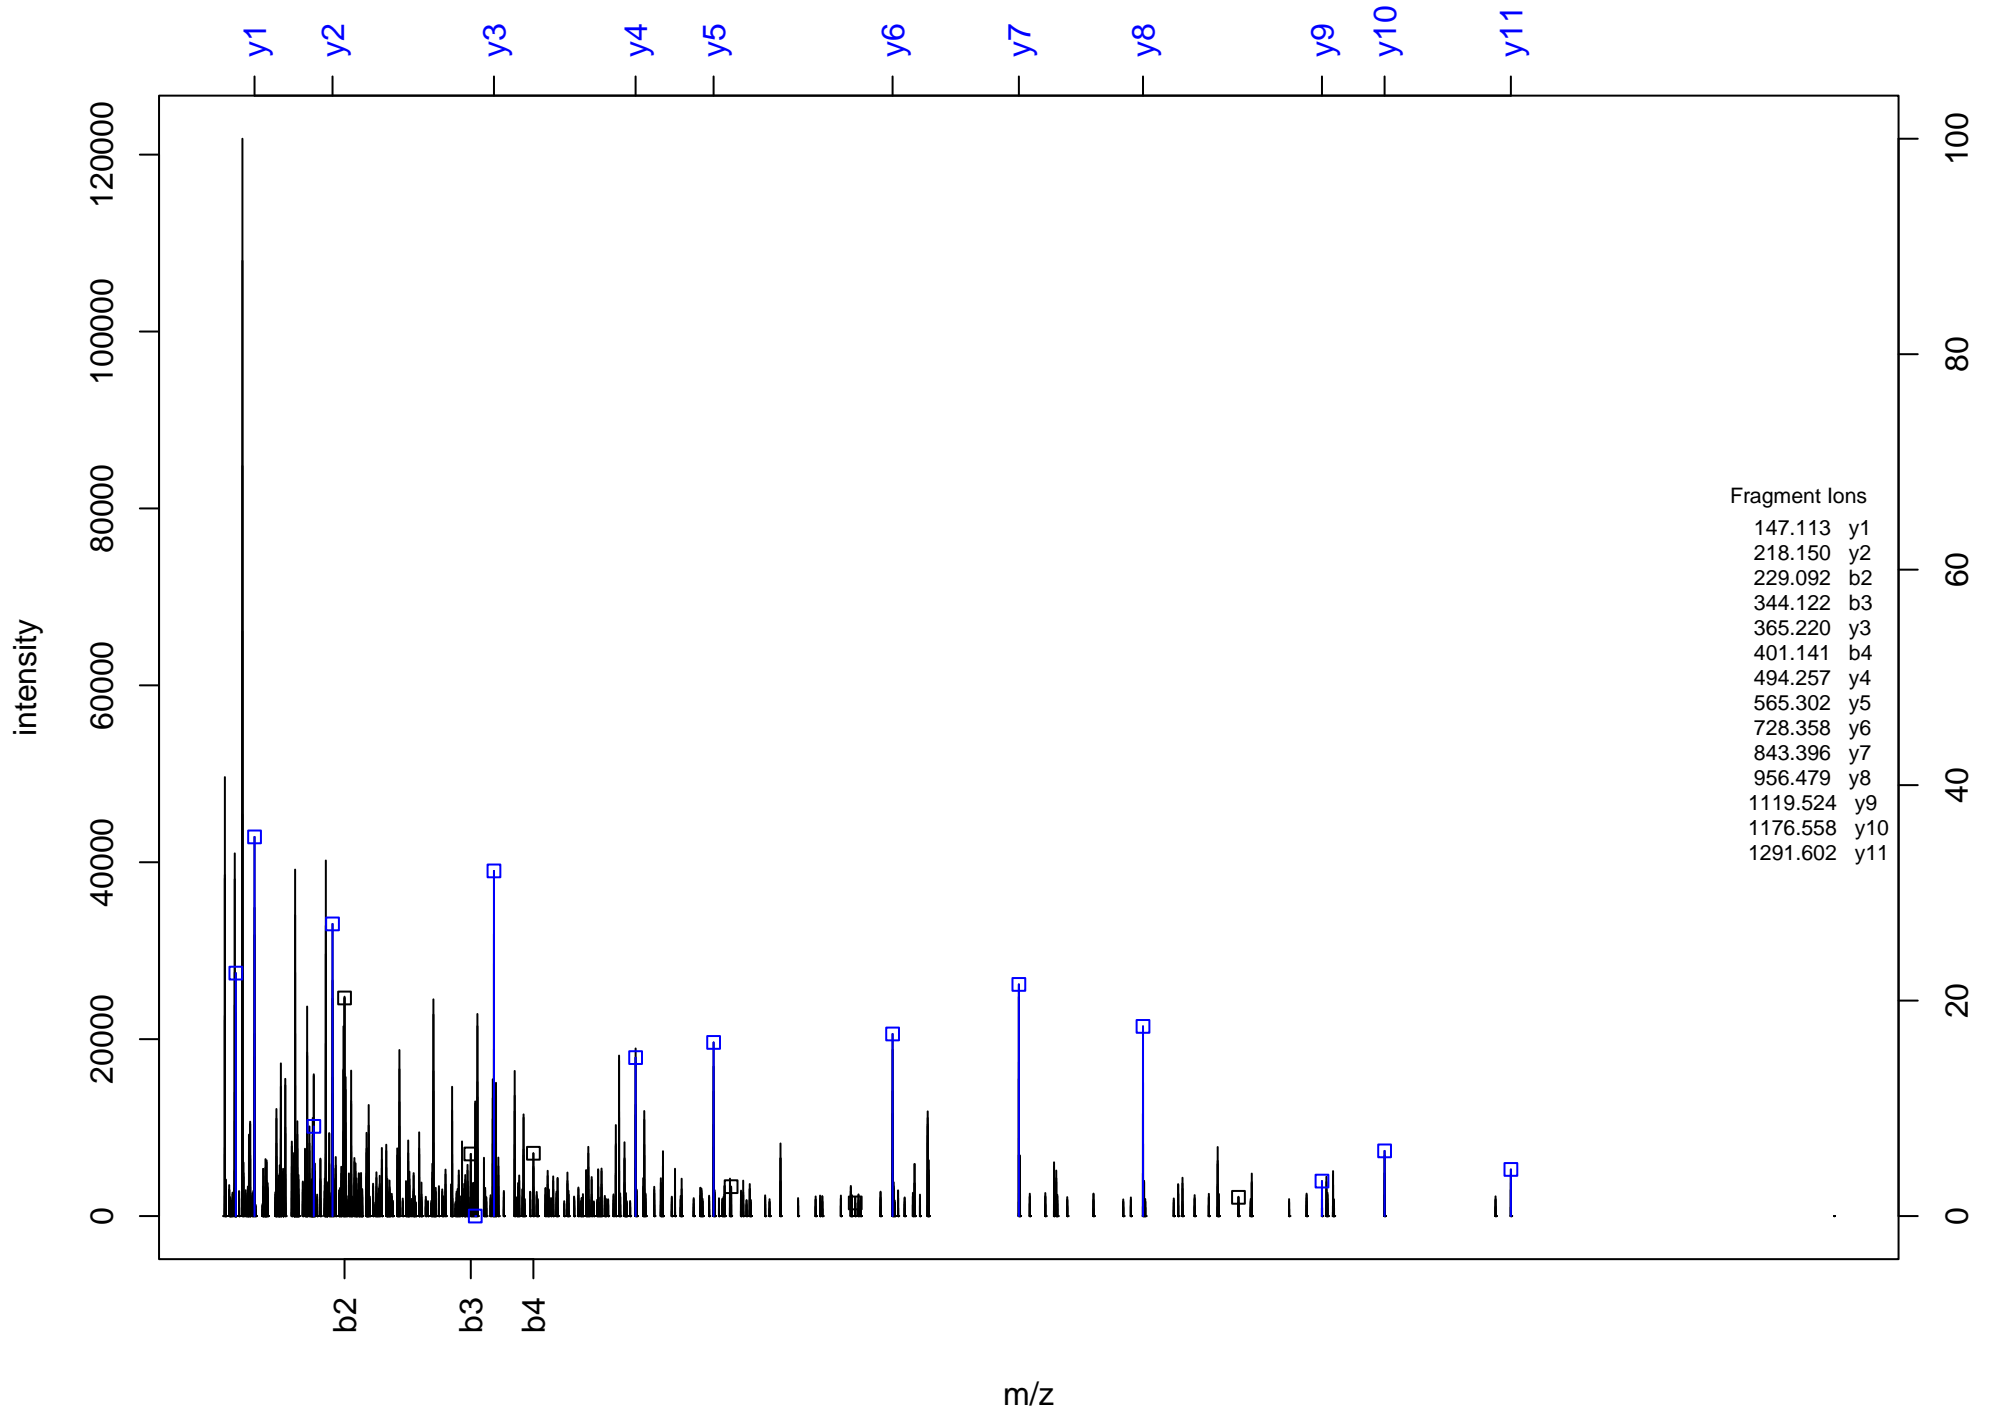

# LQDDILDSLGGINELK

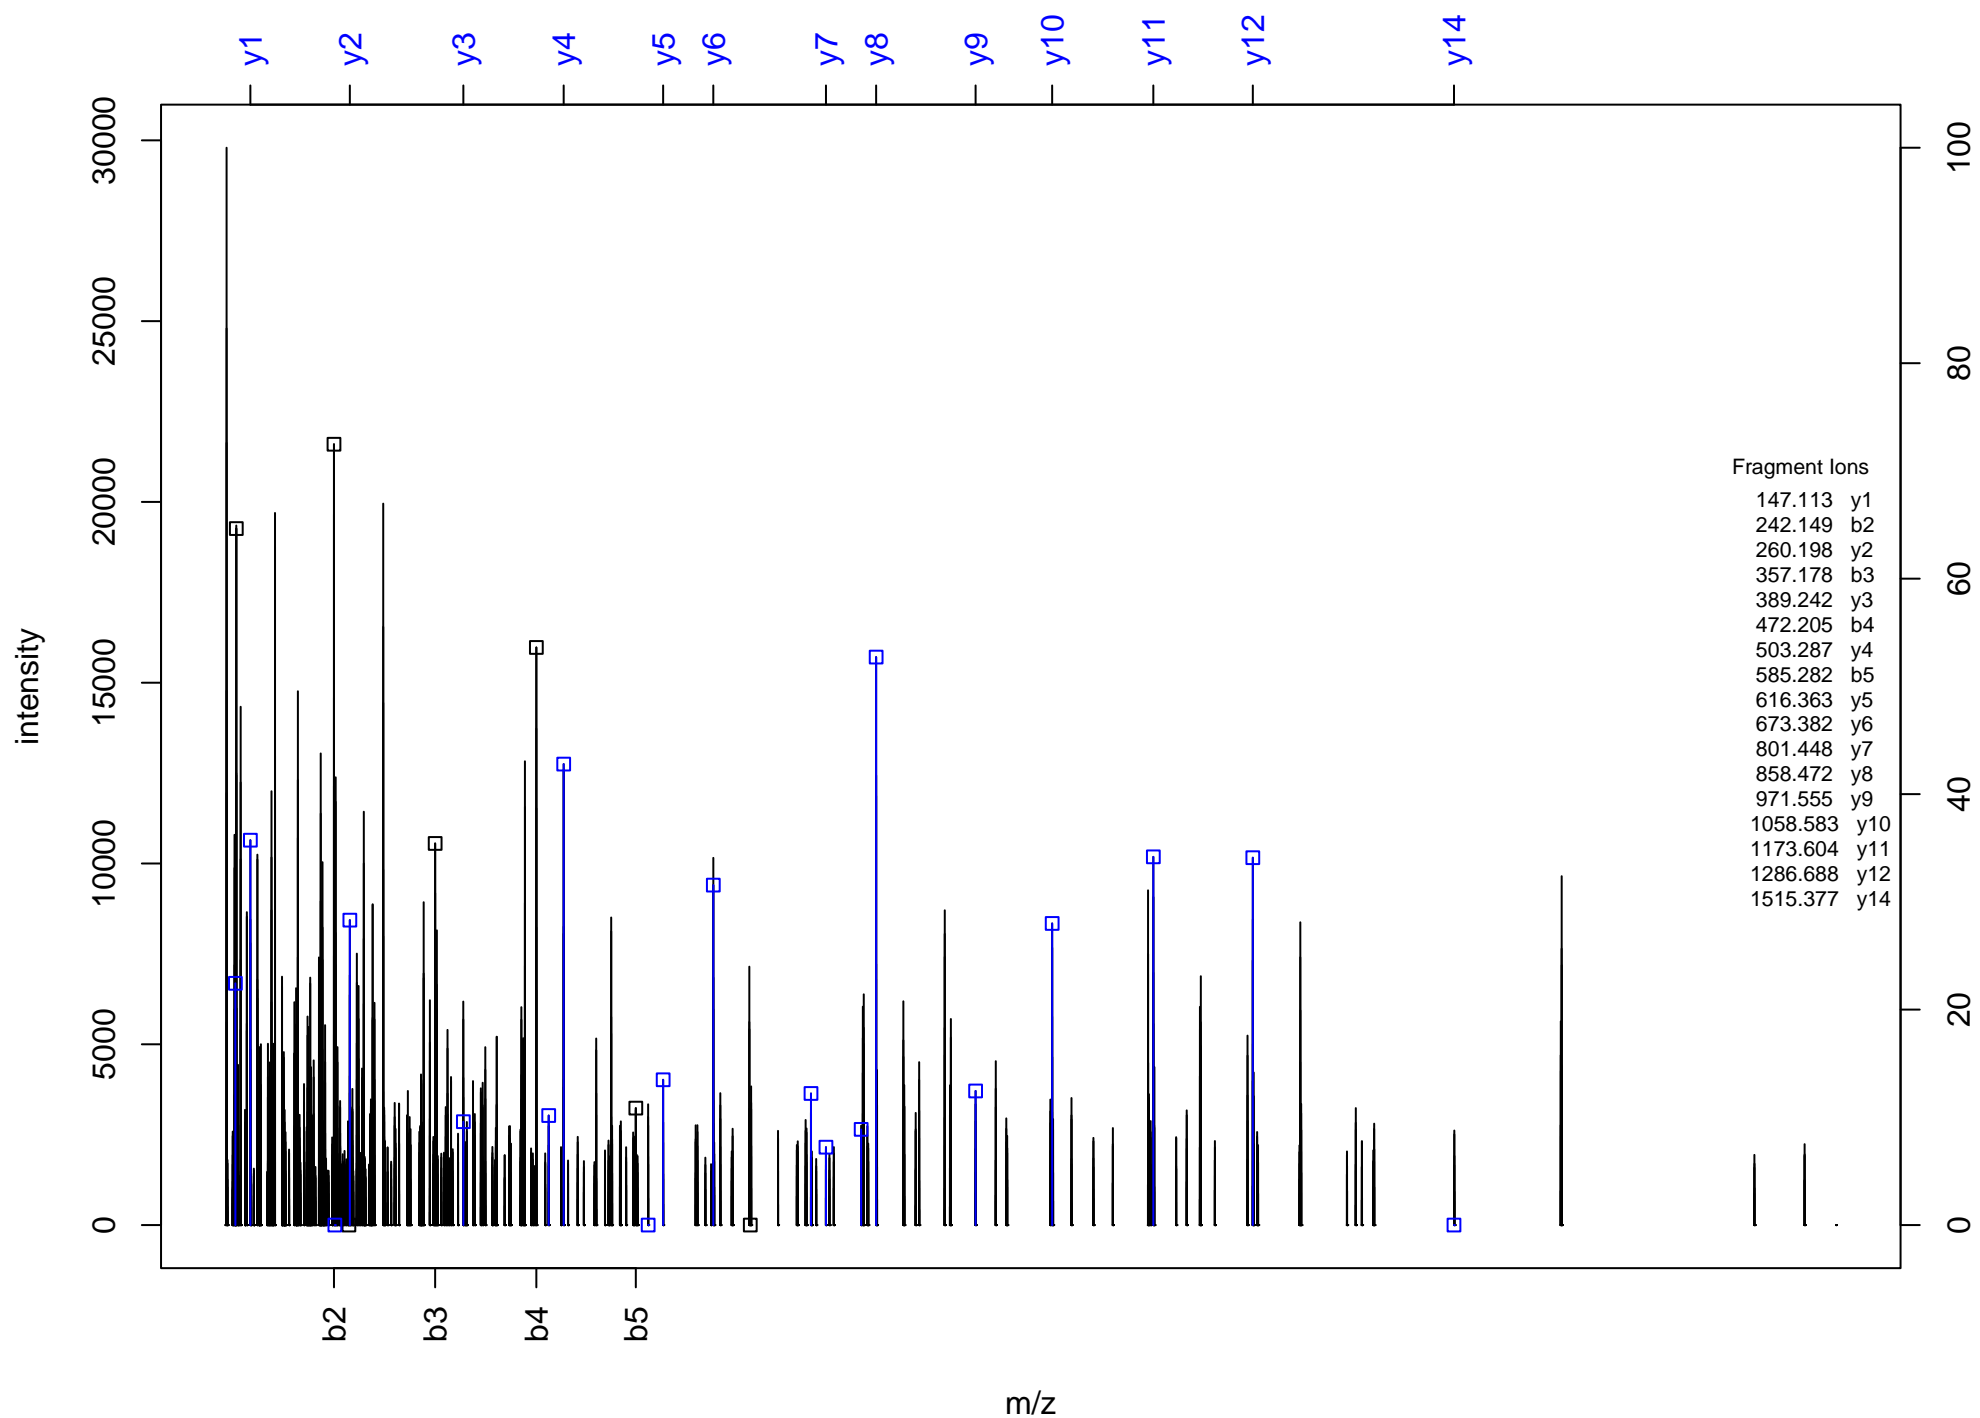

# LSGAEPDDEEYQFEEMLEHAEAAQDFASR

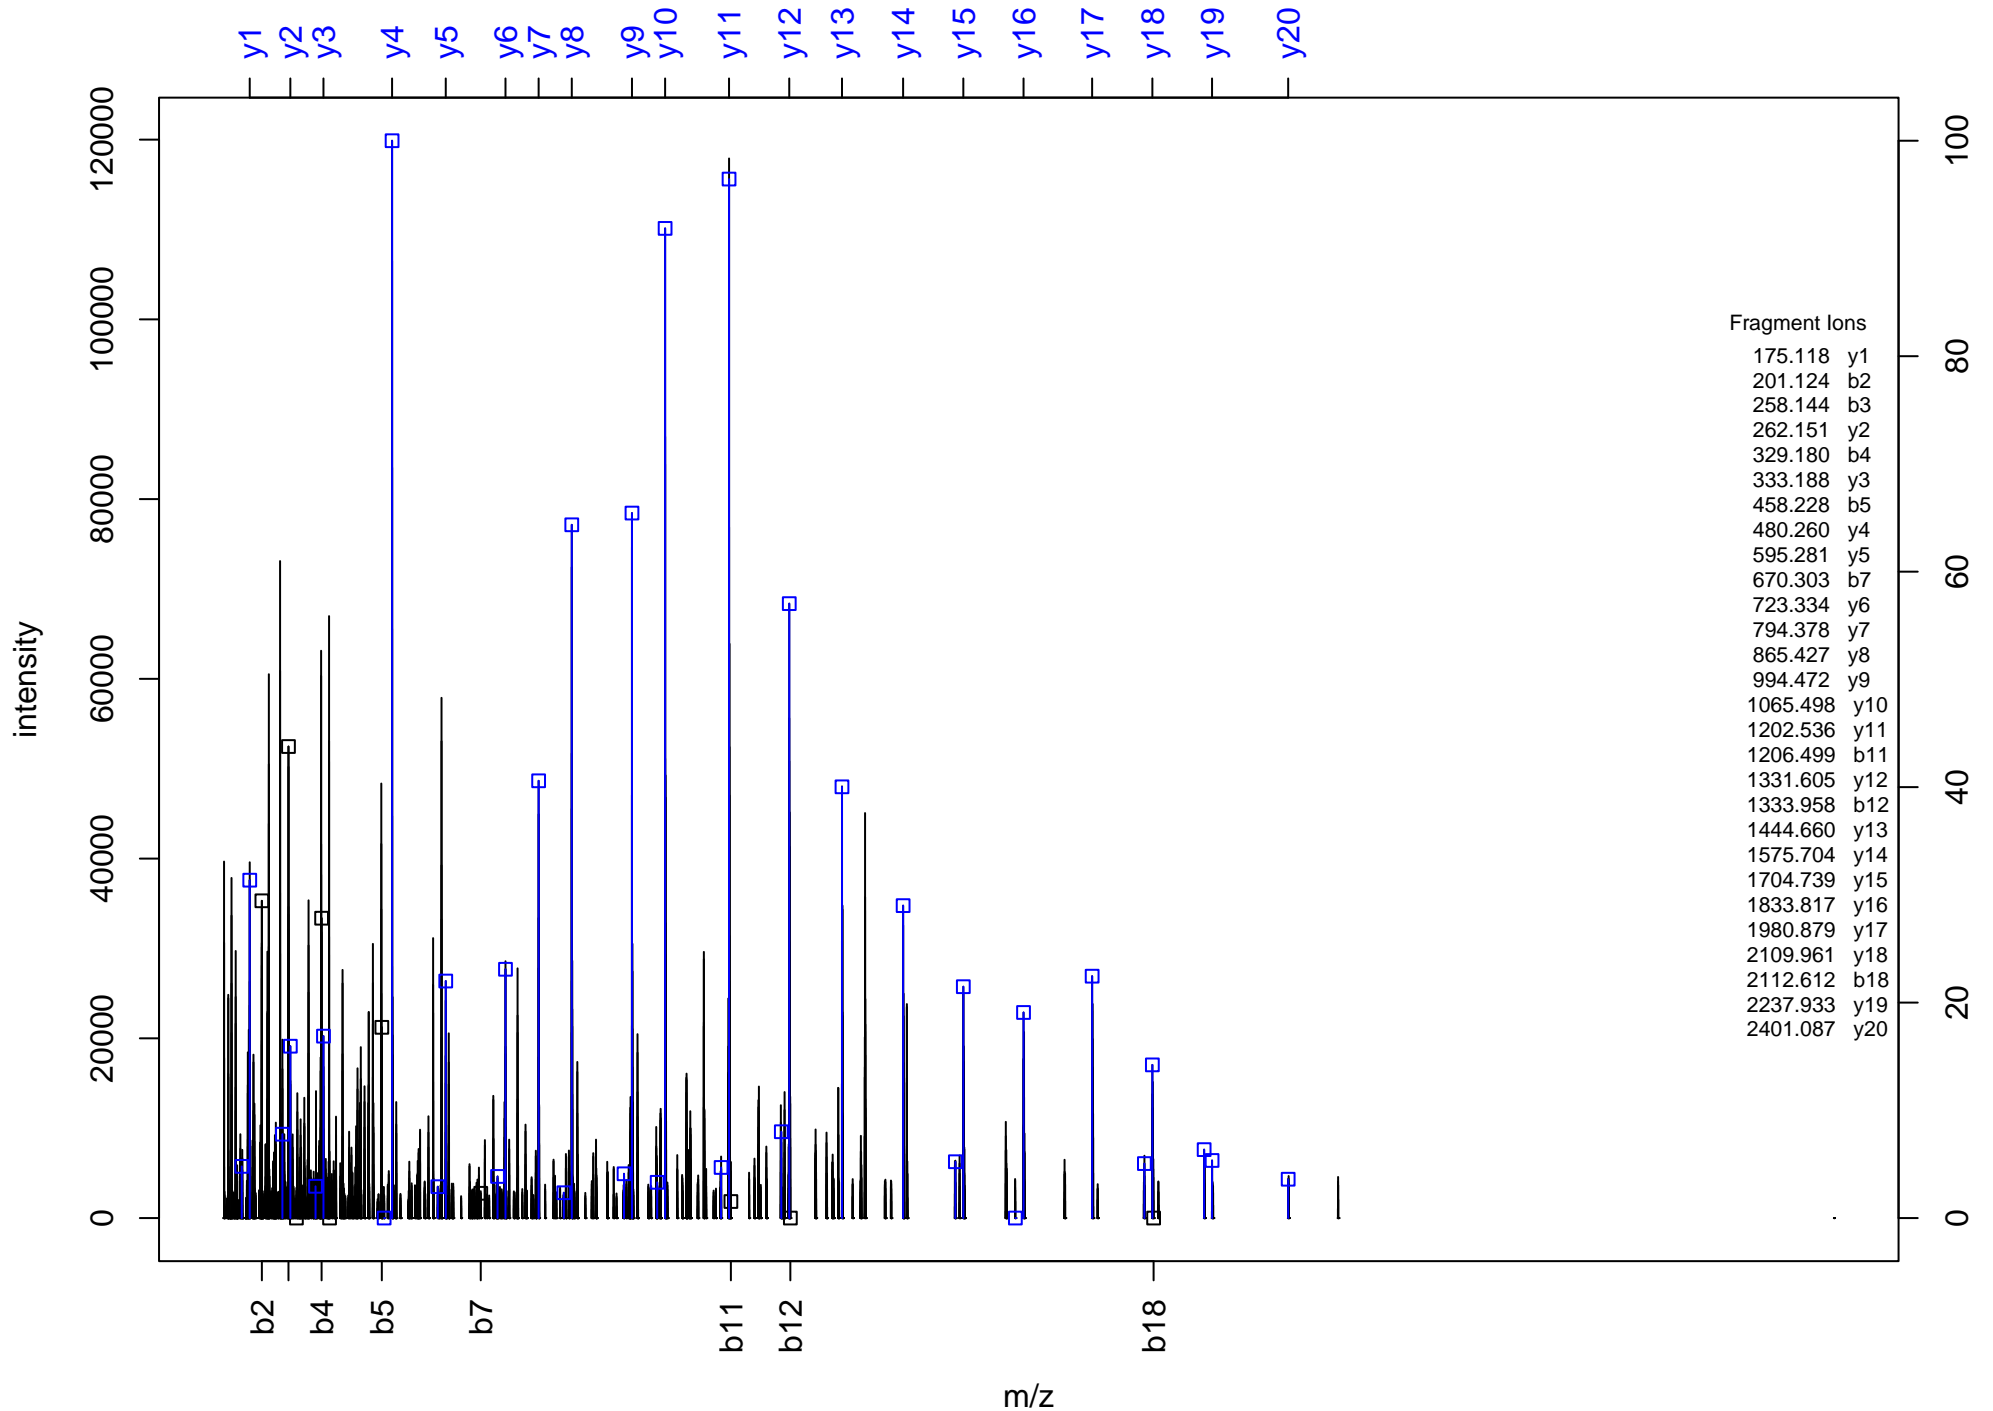

# TIQGLIDFIK

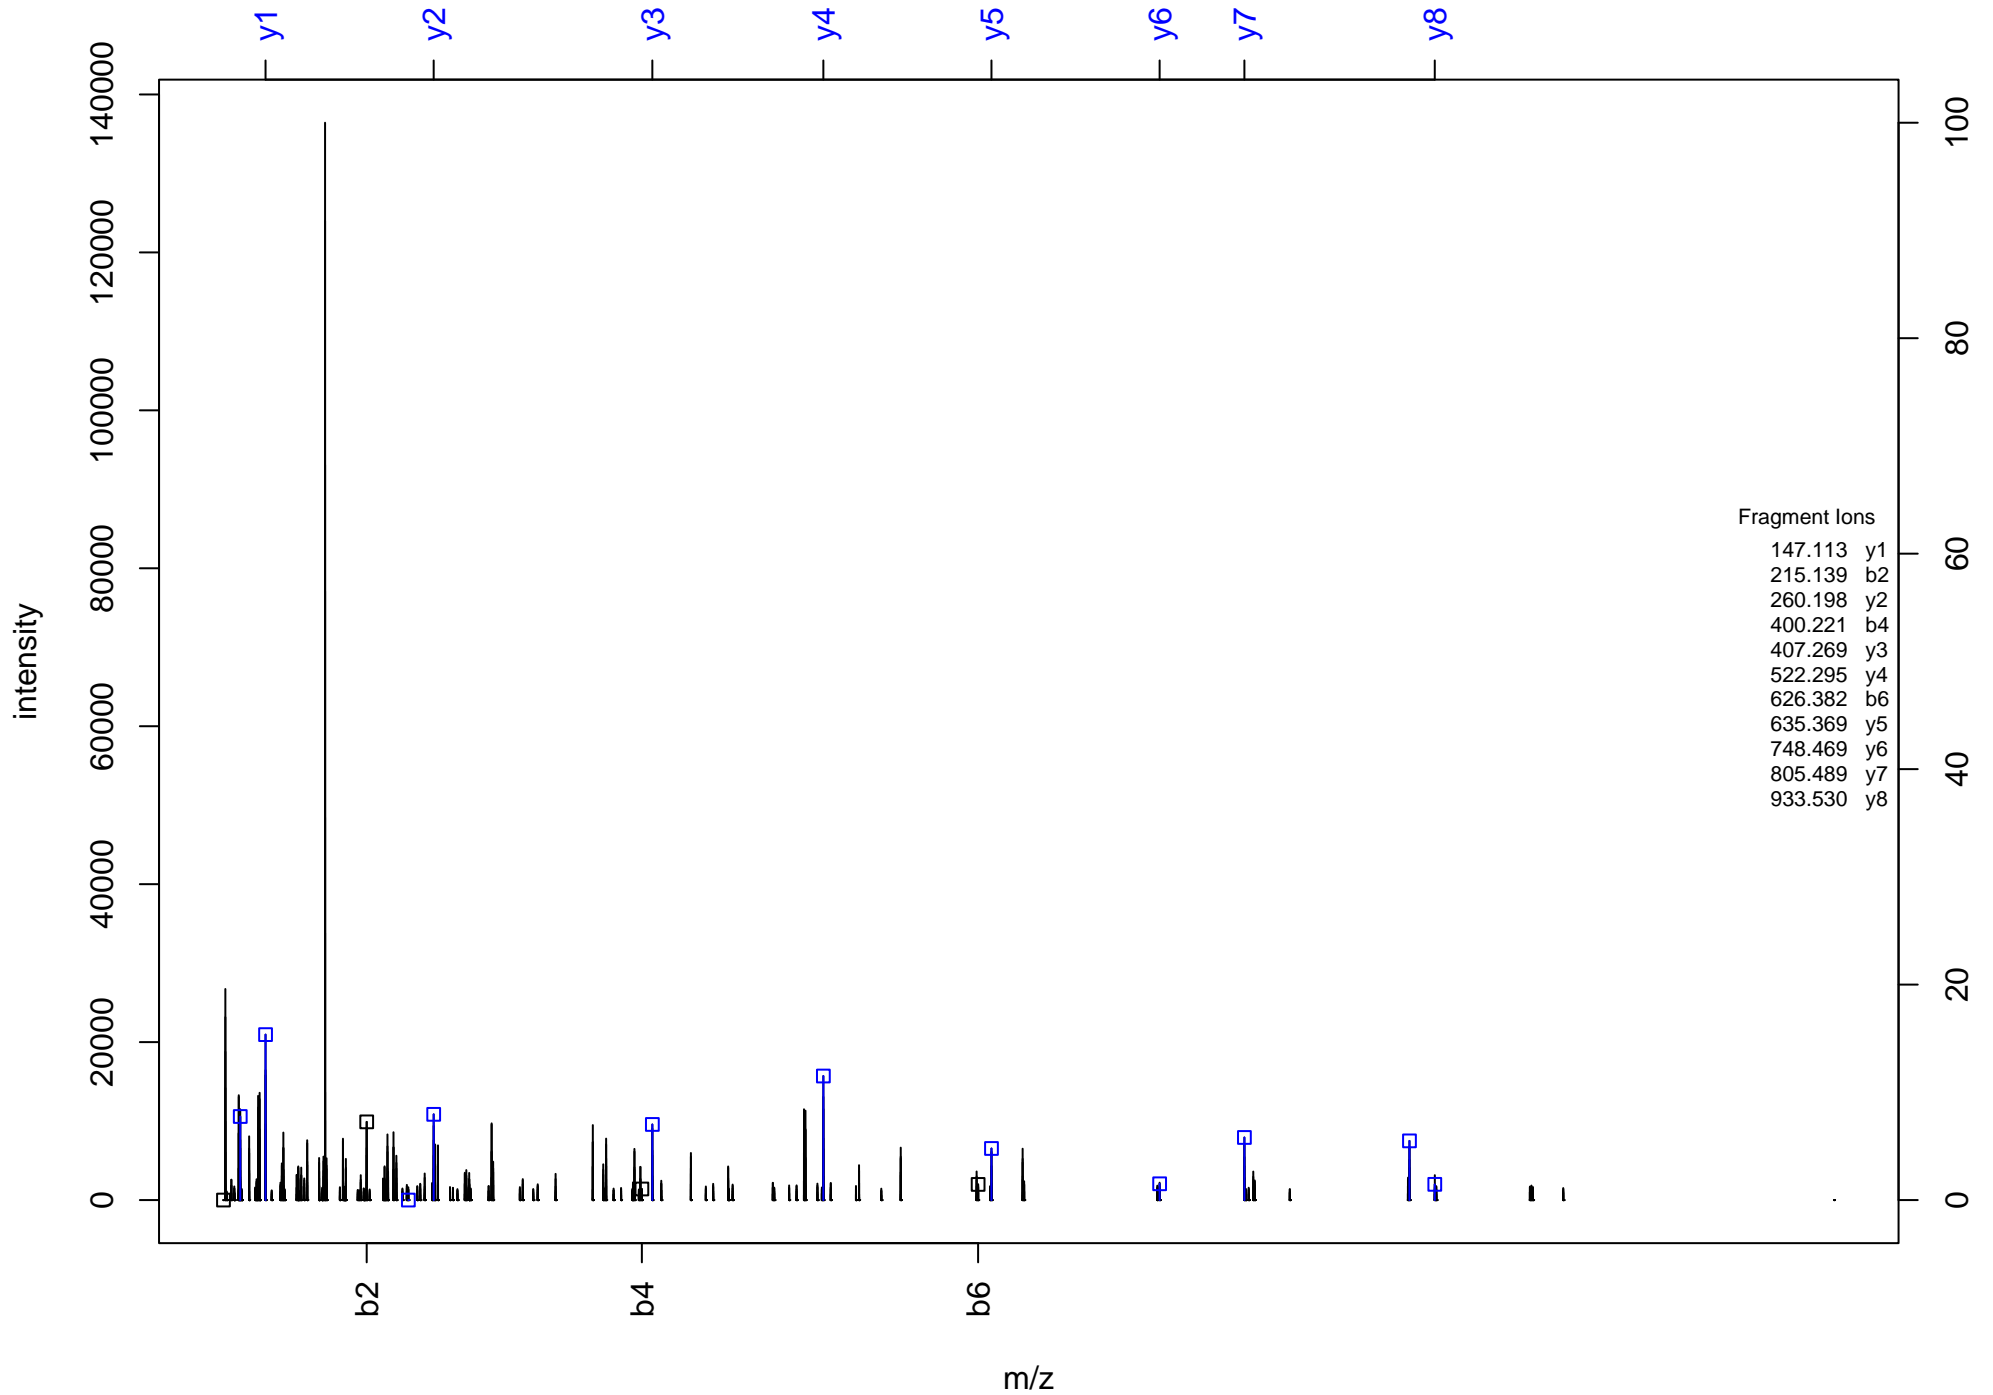



# LPSMGDQEPPGQEK

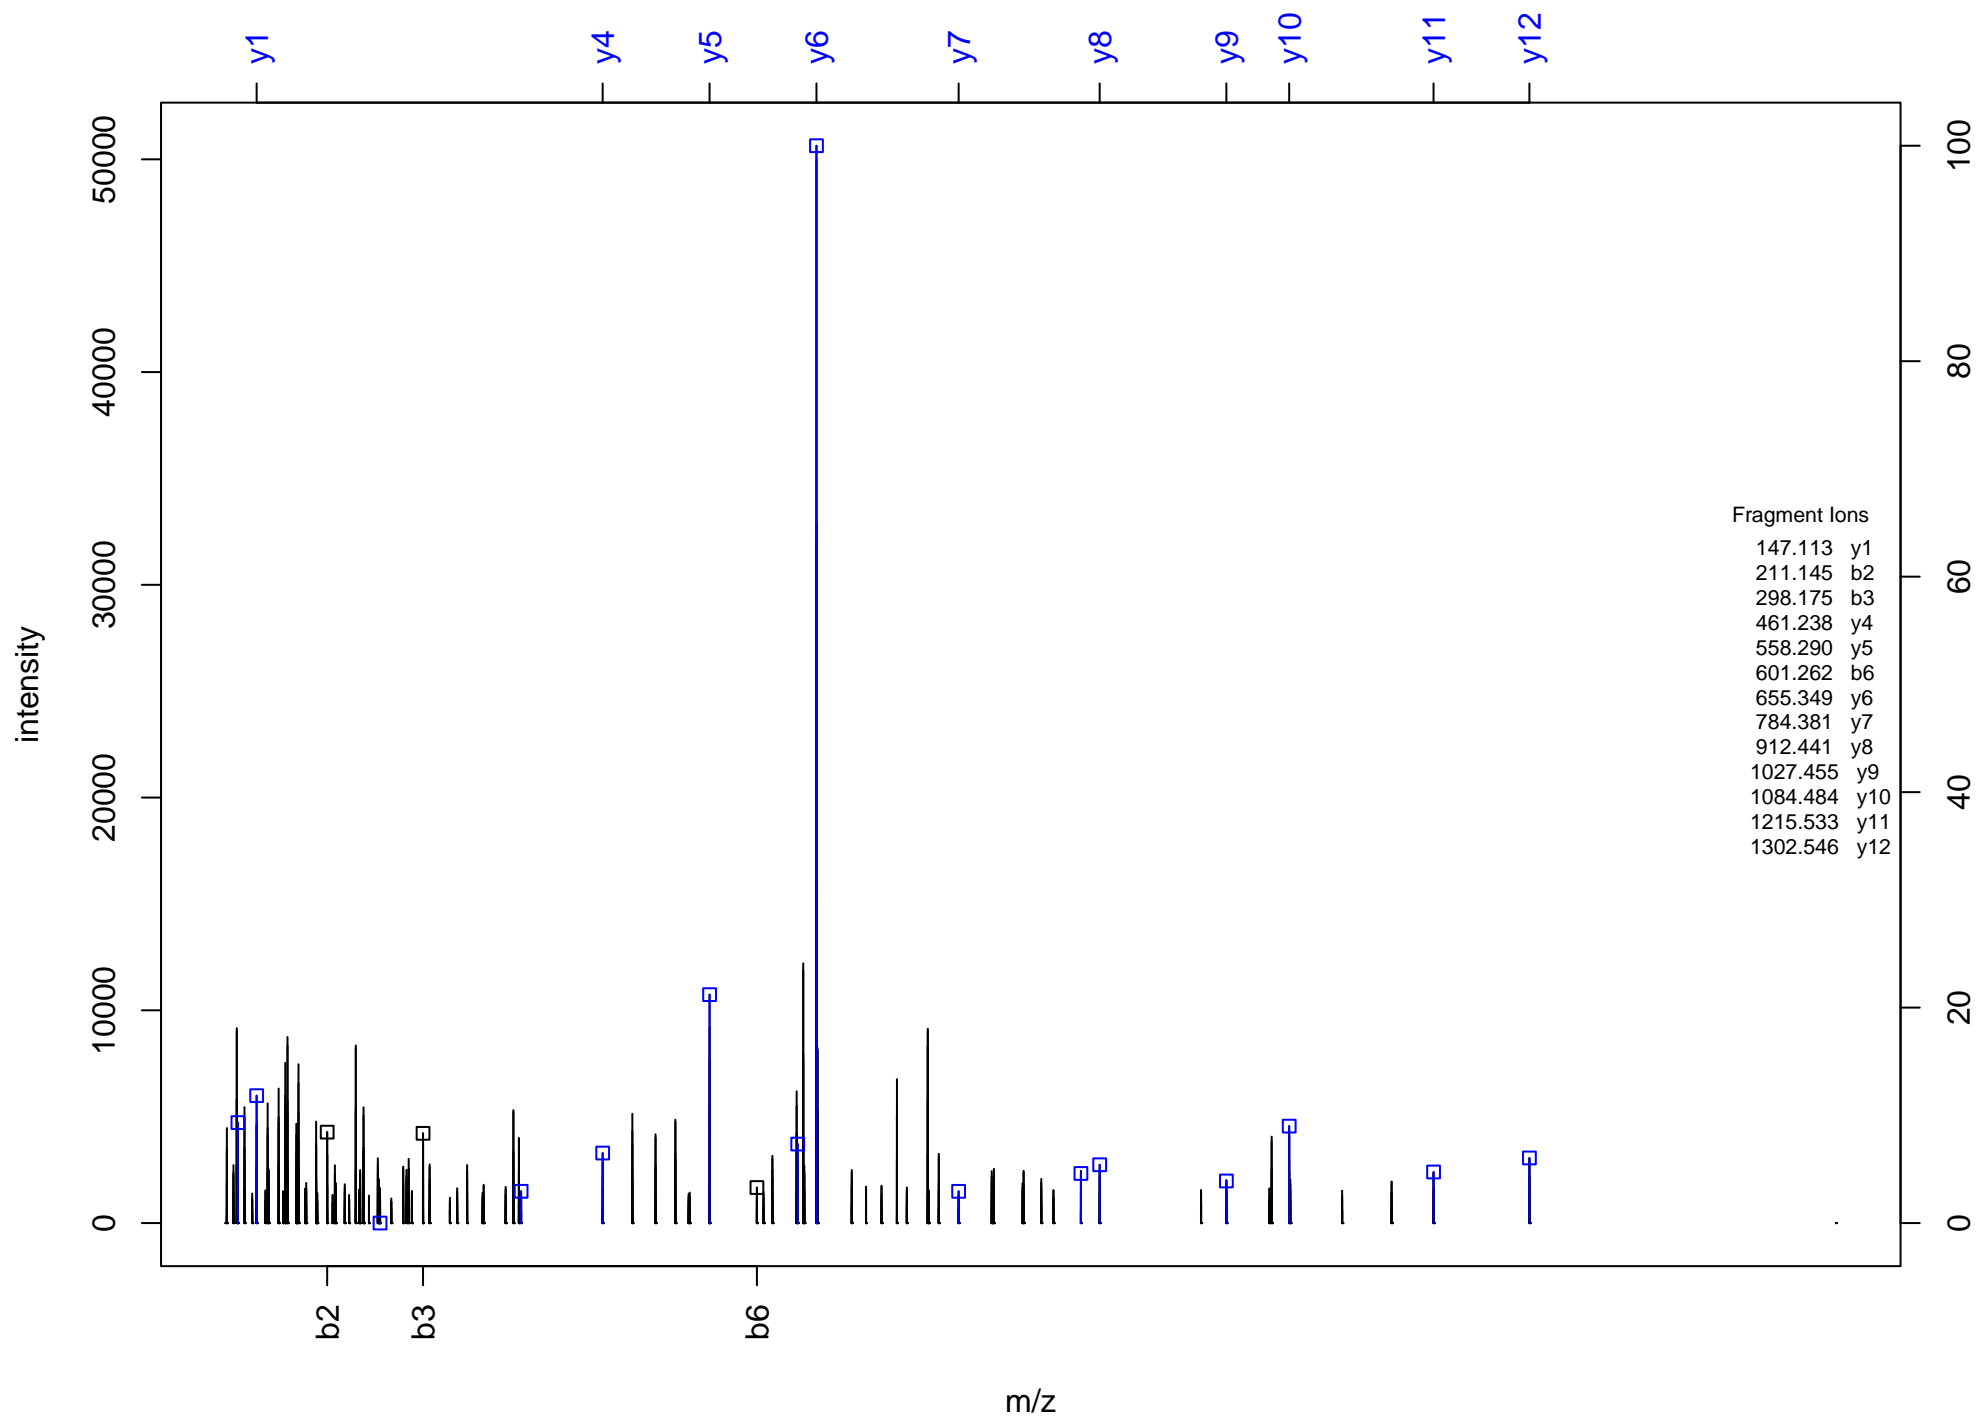

# SILTPWVELGGK

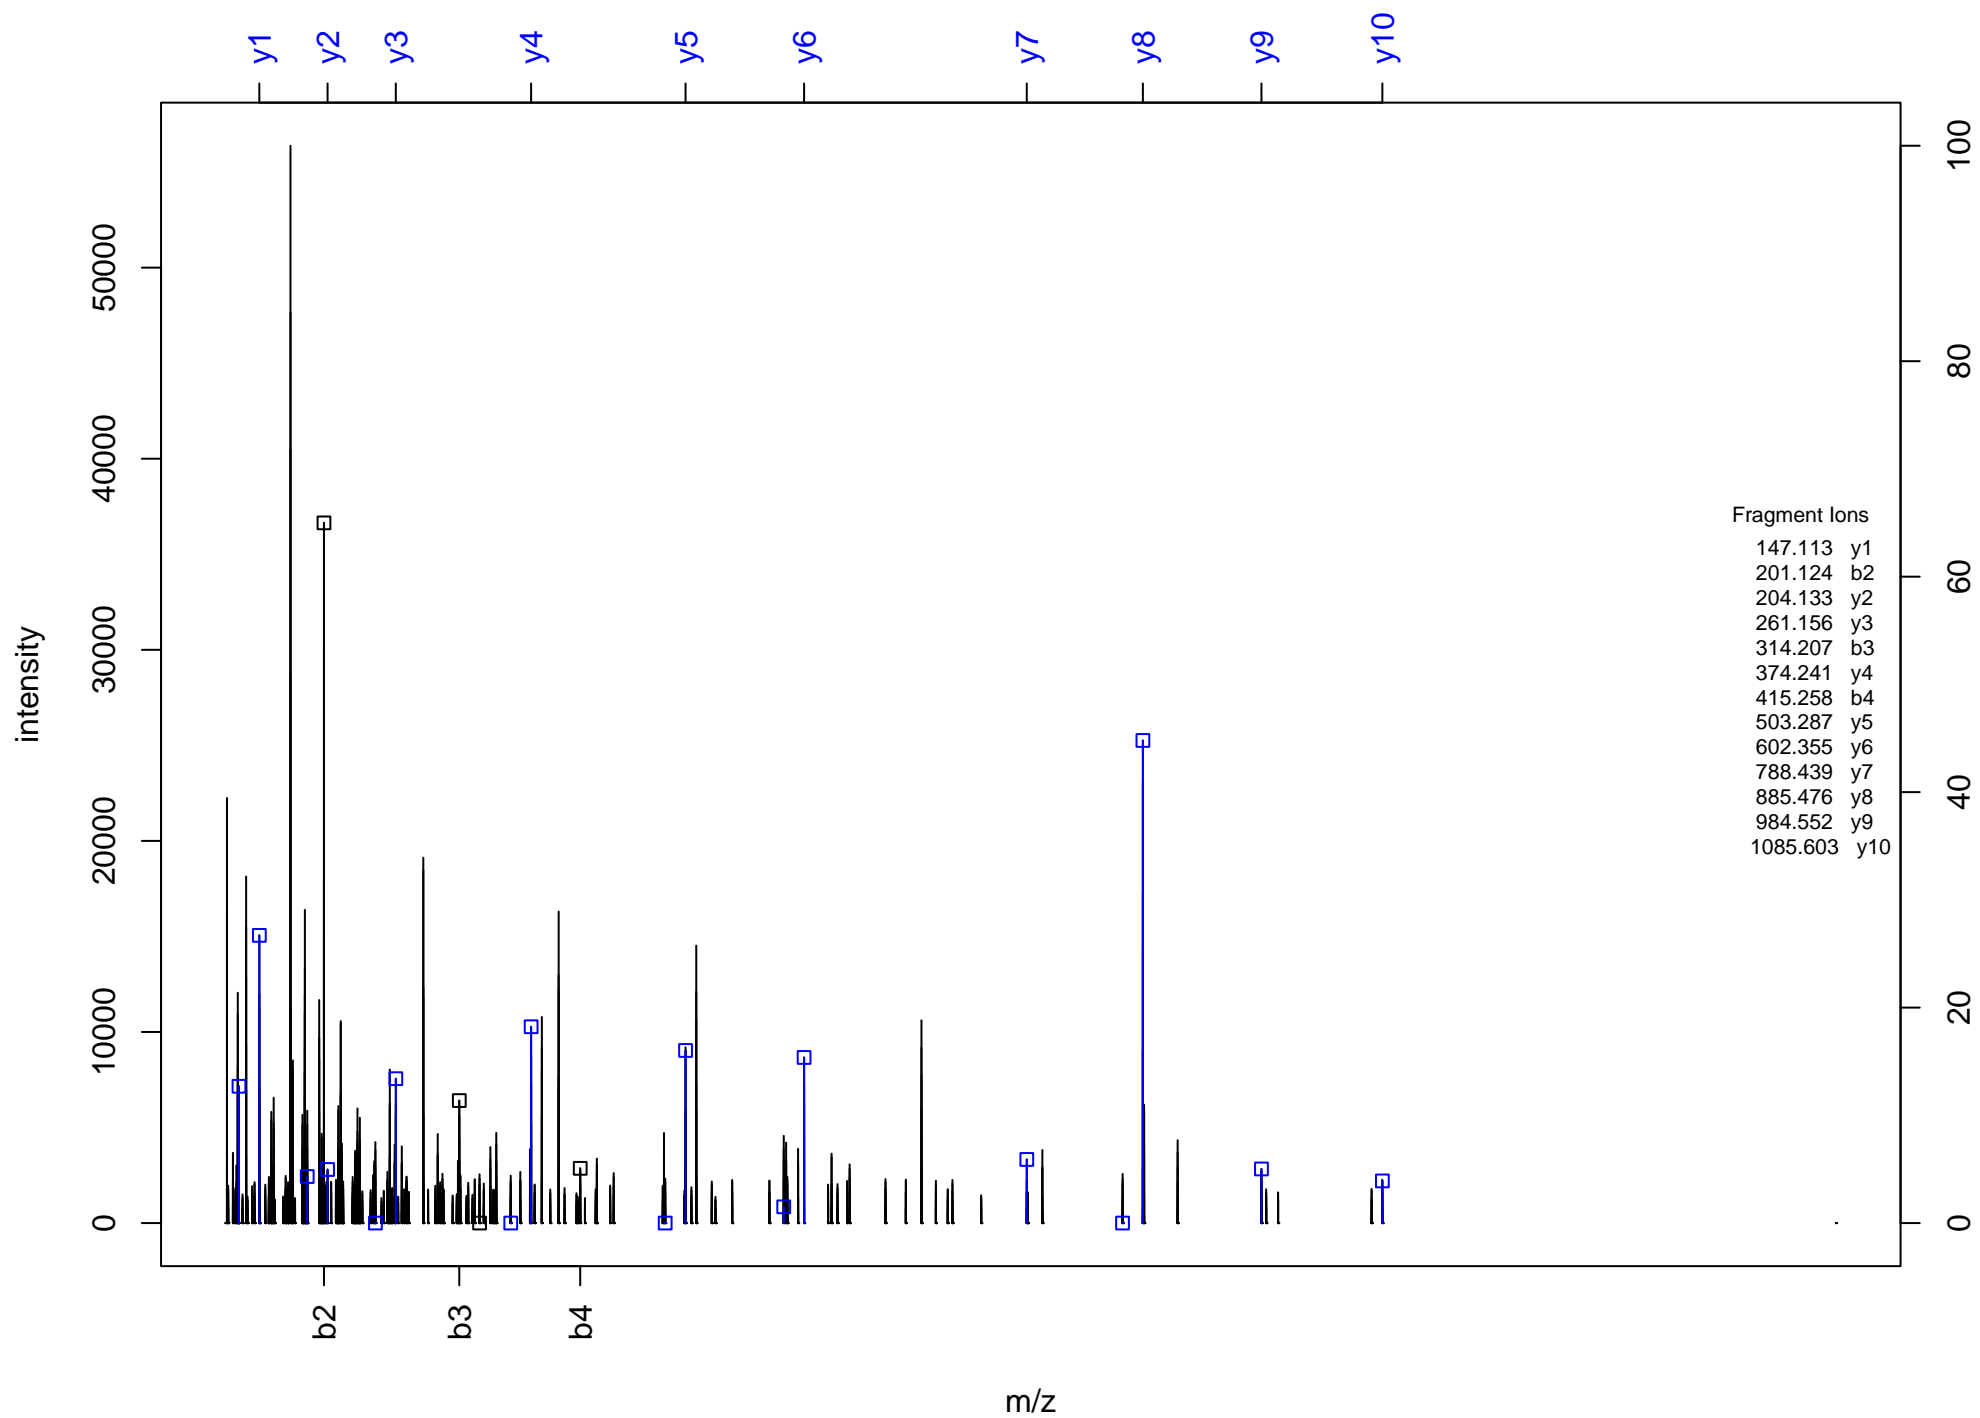

# SGELEVPDCEGLQR

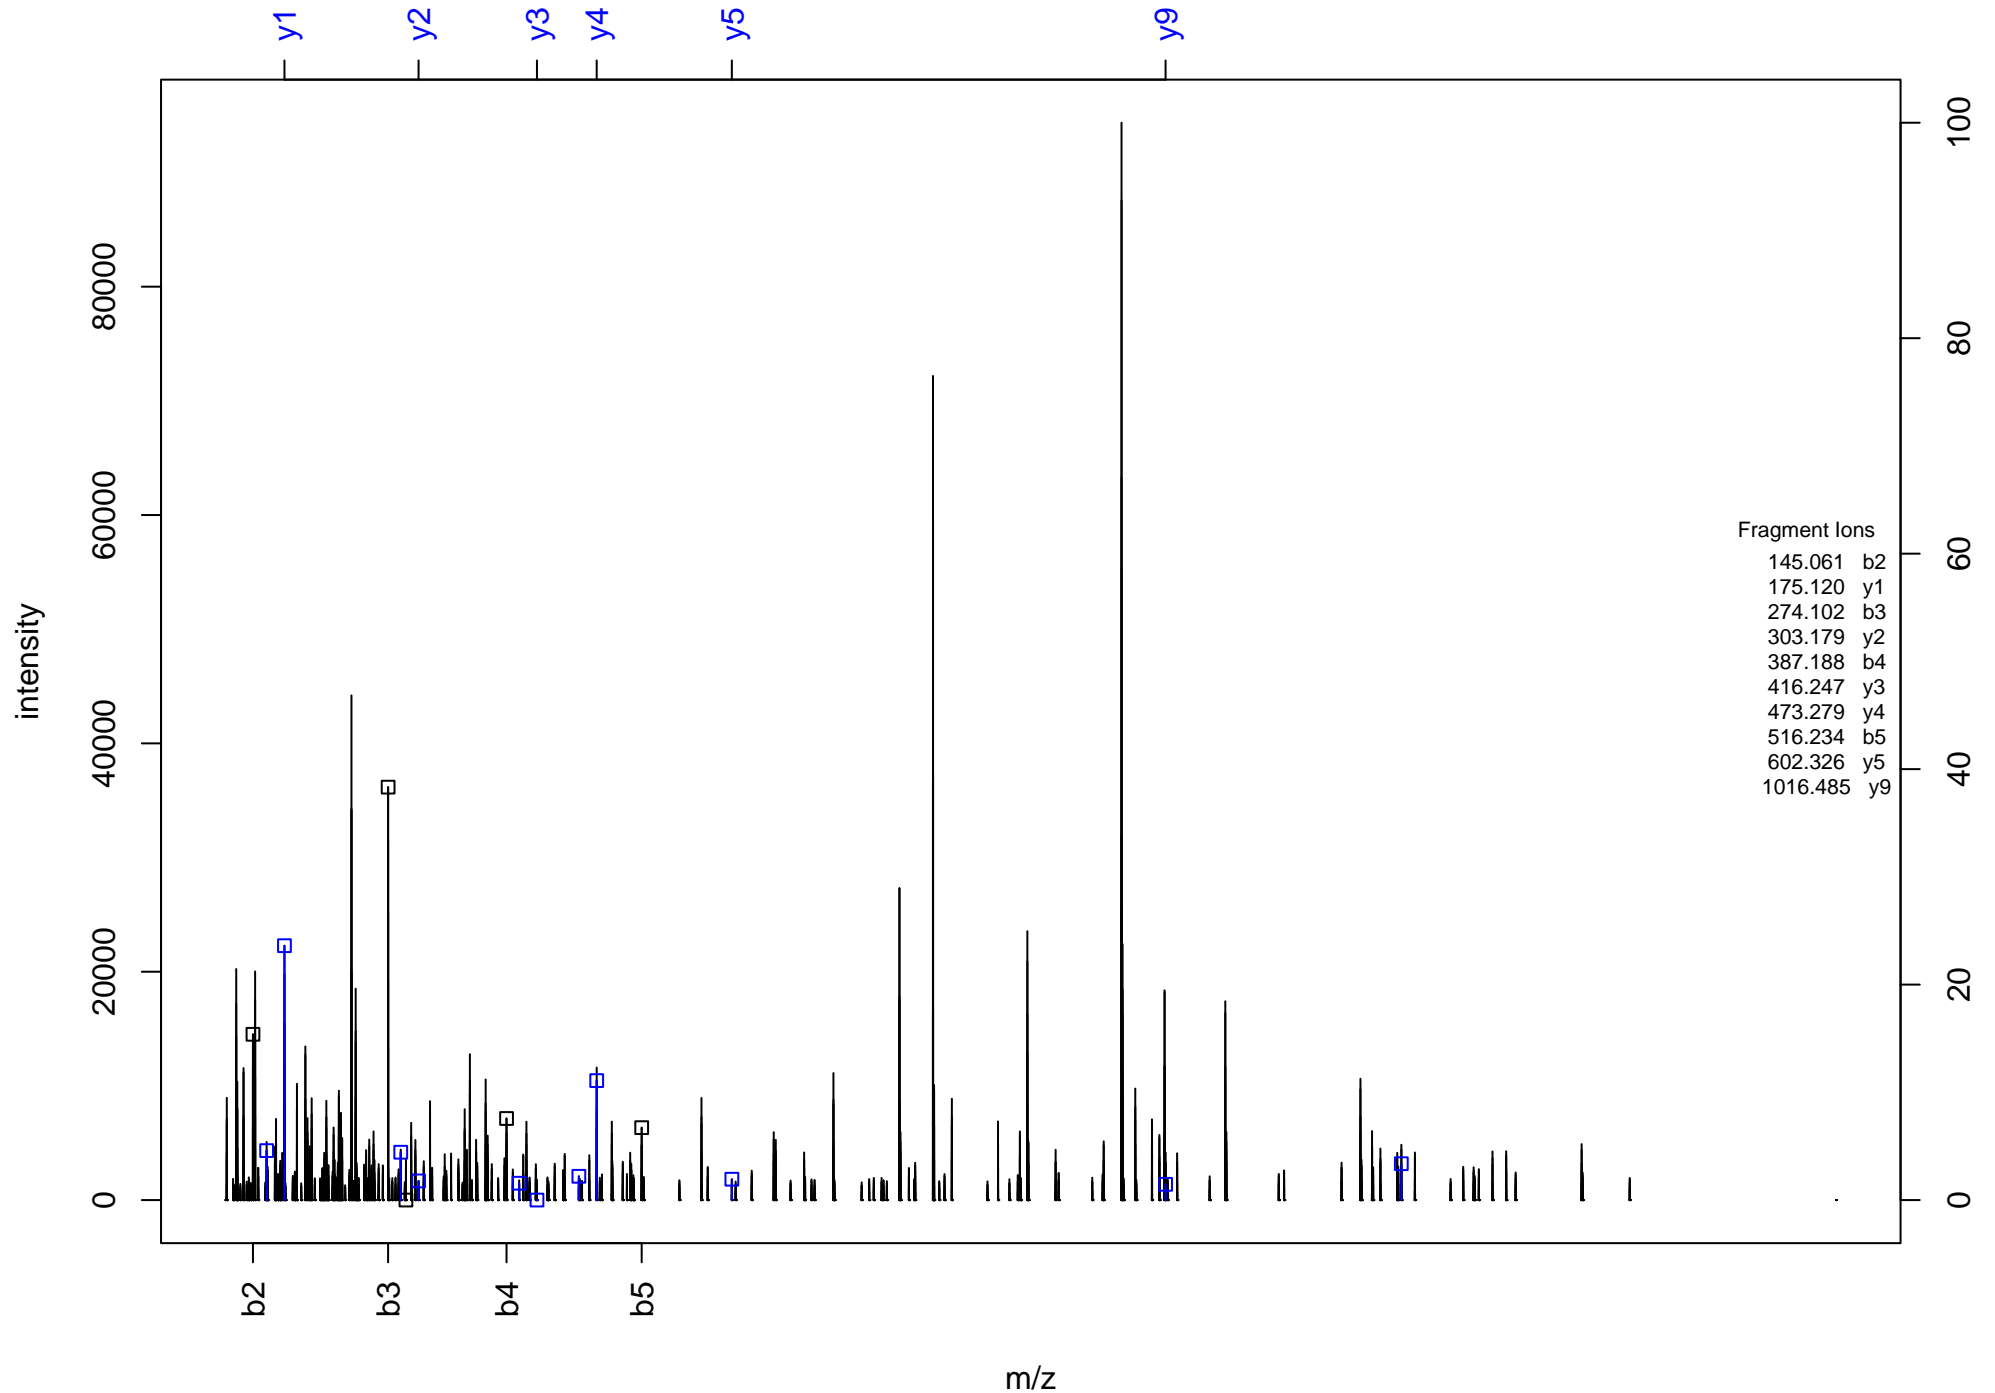

# LYSIILSAPIPEPK

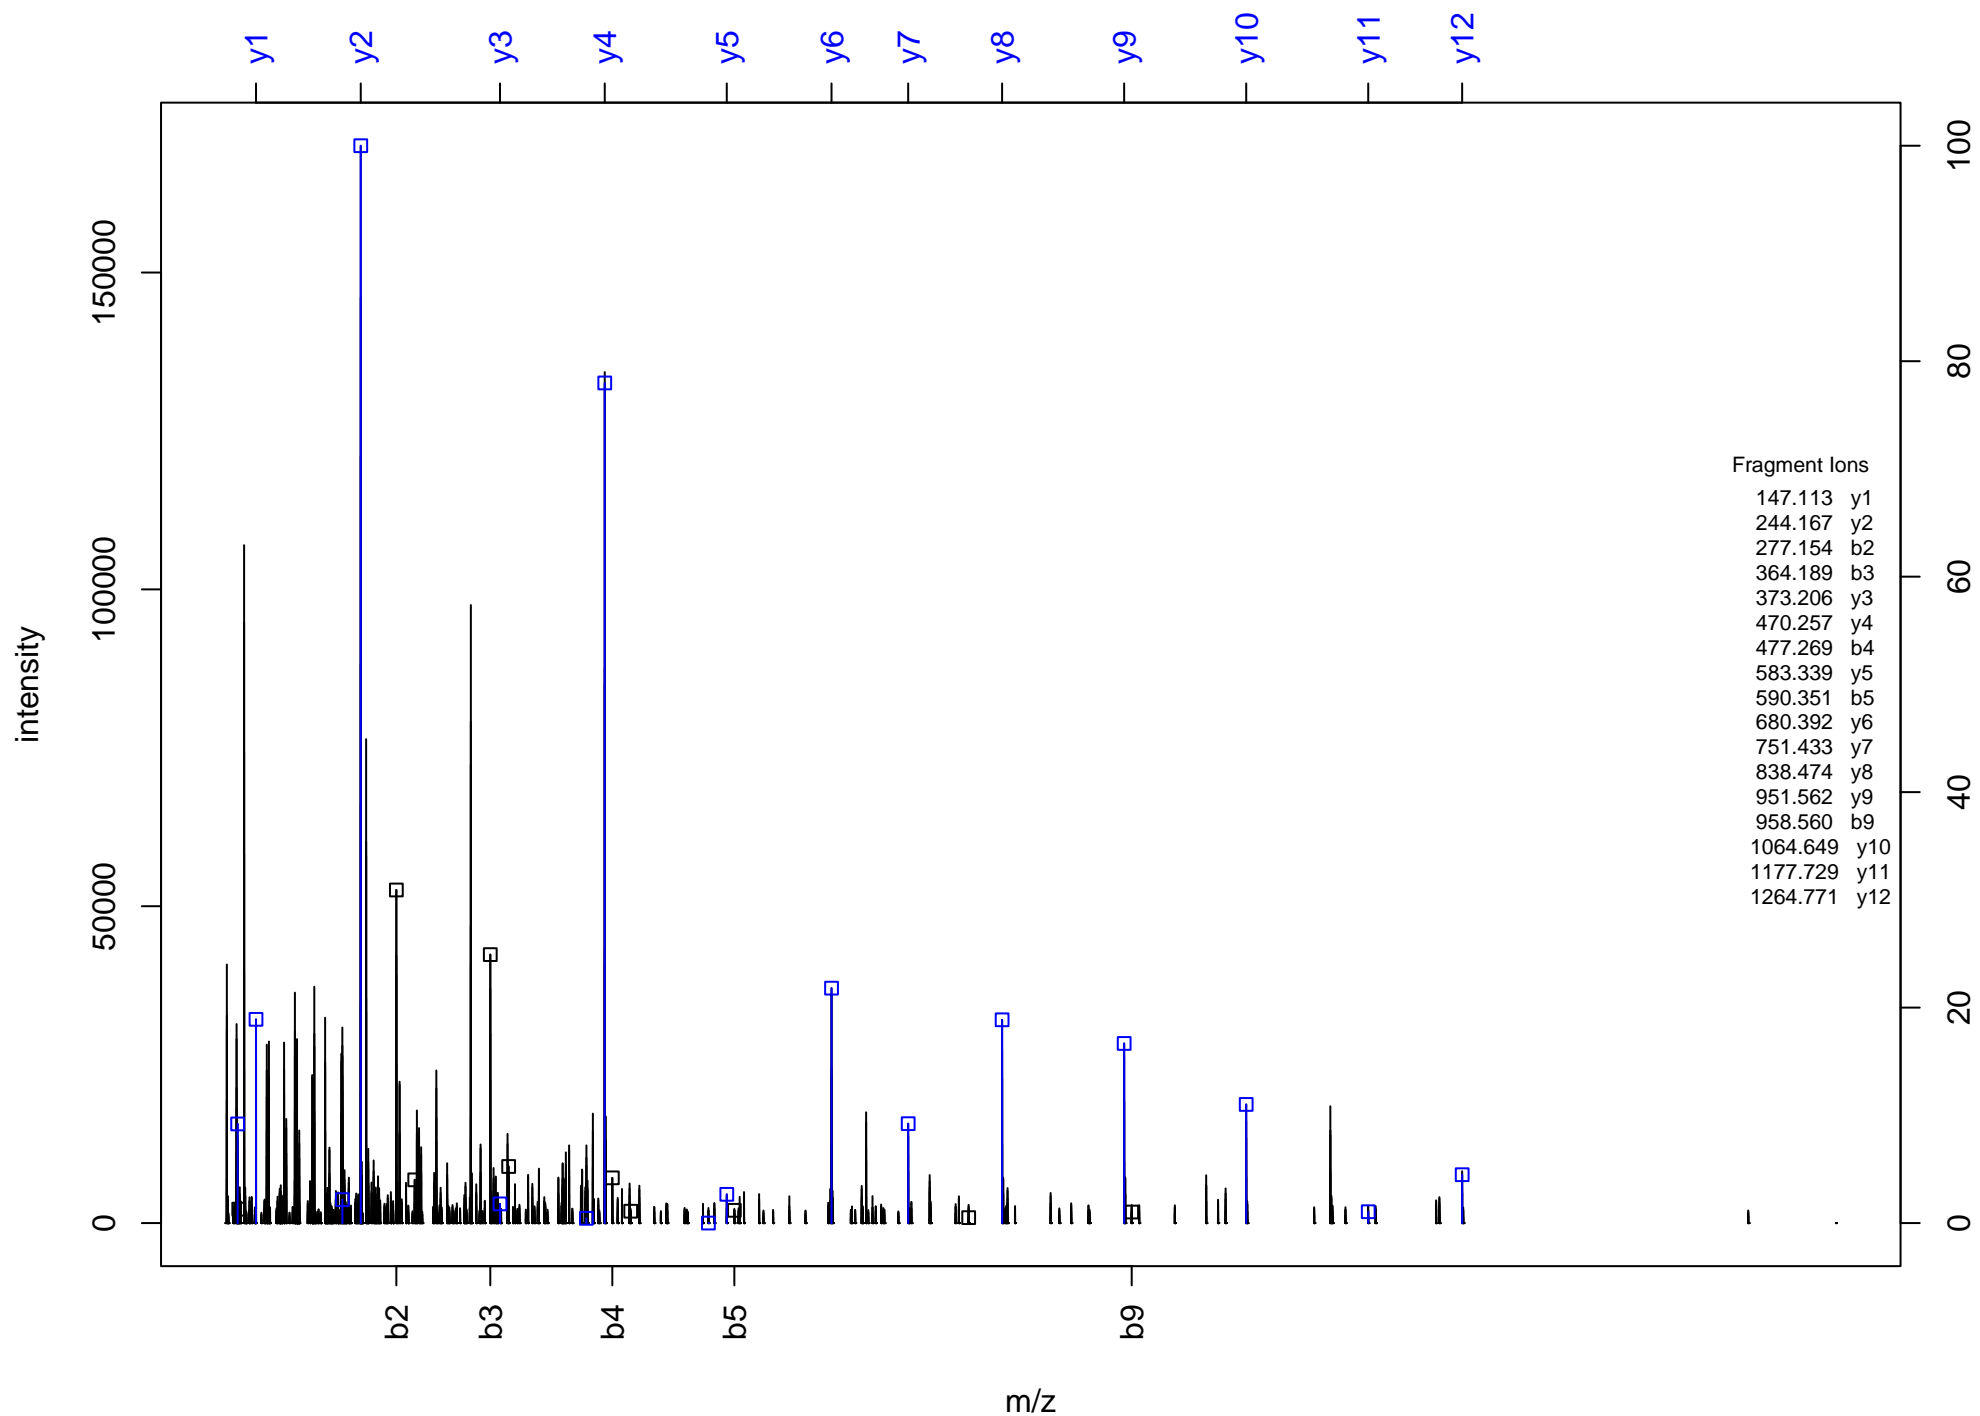

# (Ac)MWPPDAEPEPDPEAHGPR

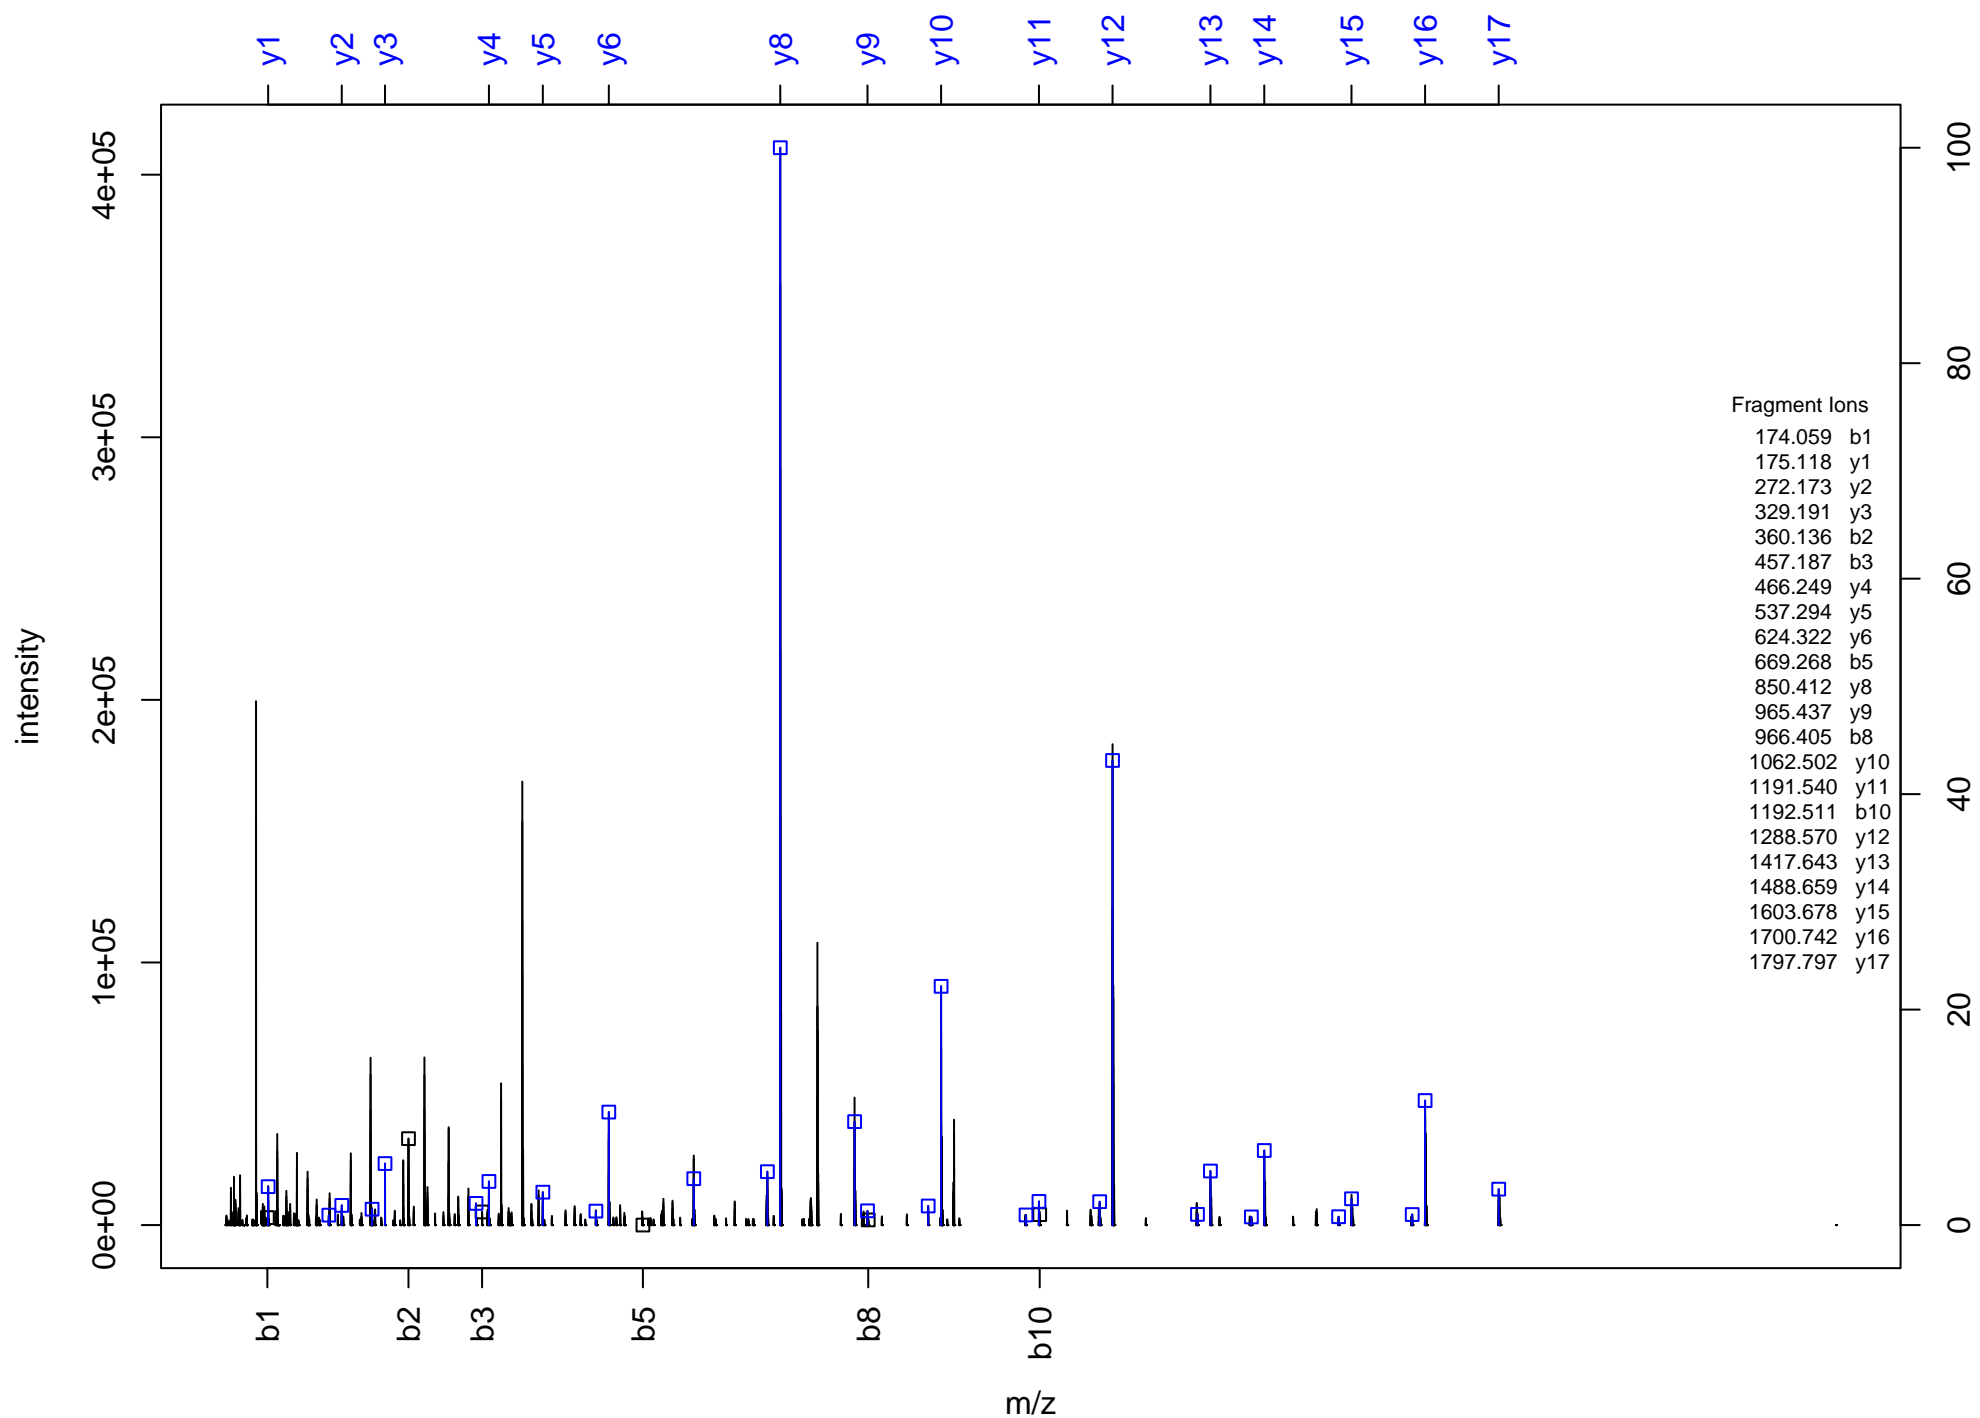

# (Ac)AAAMDVDTPSGTNSGAGK

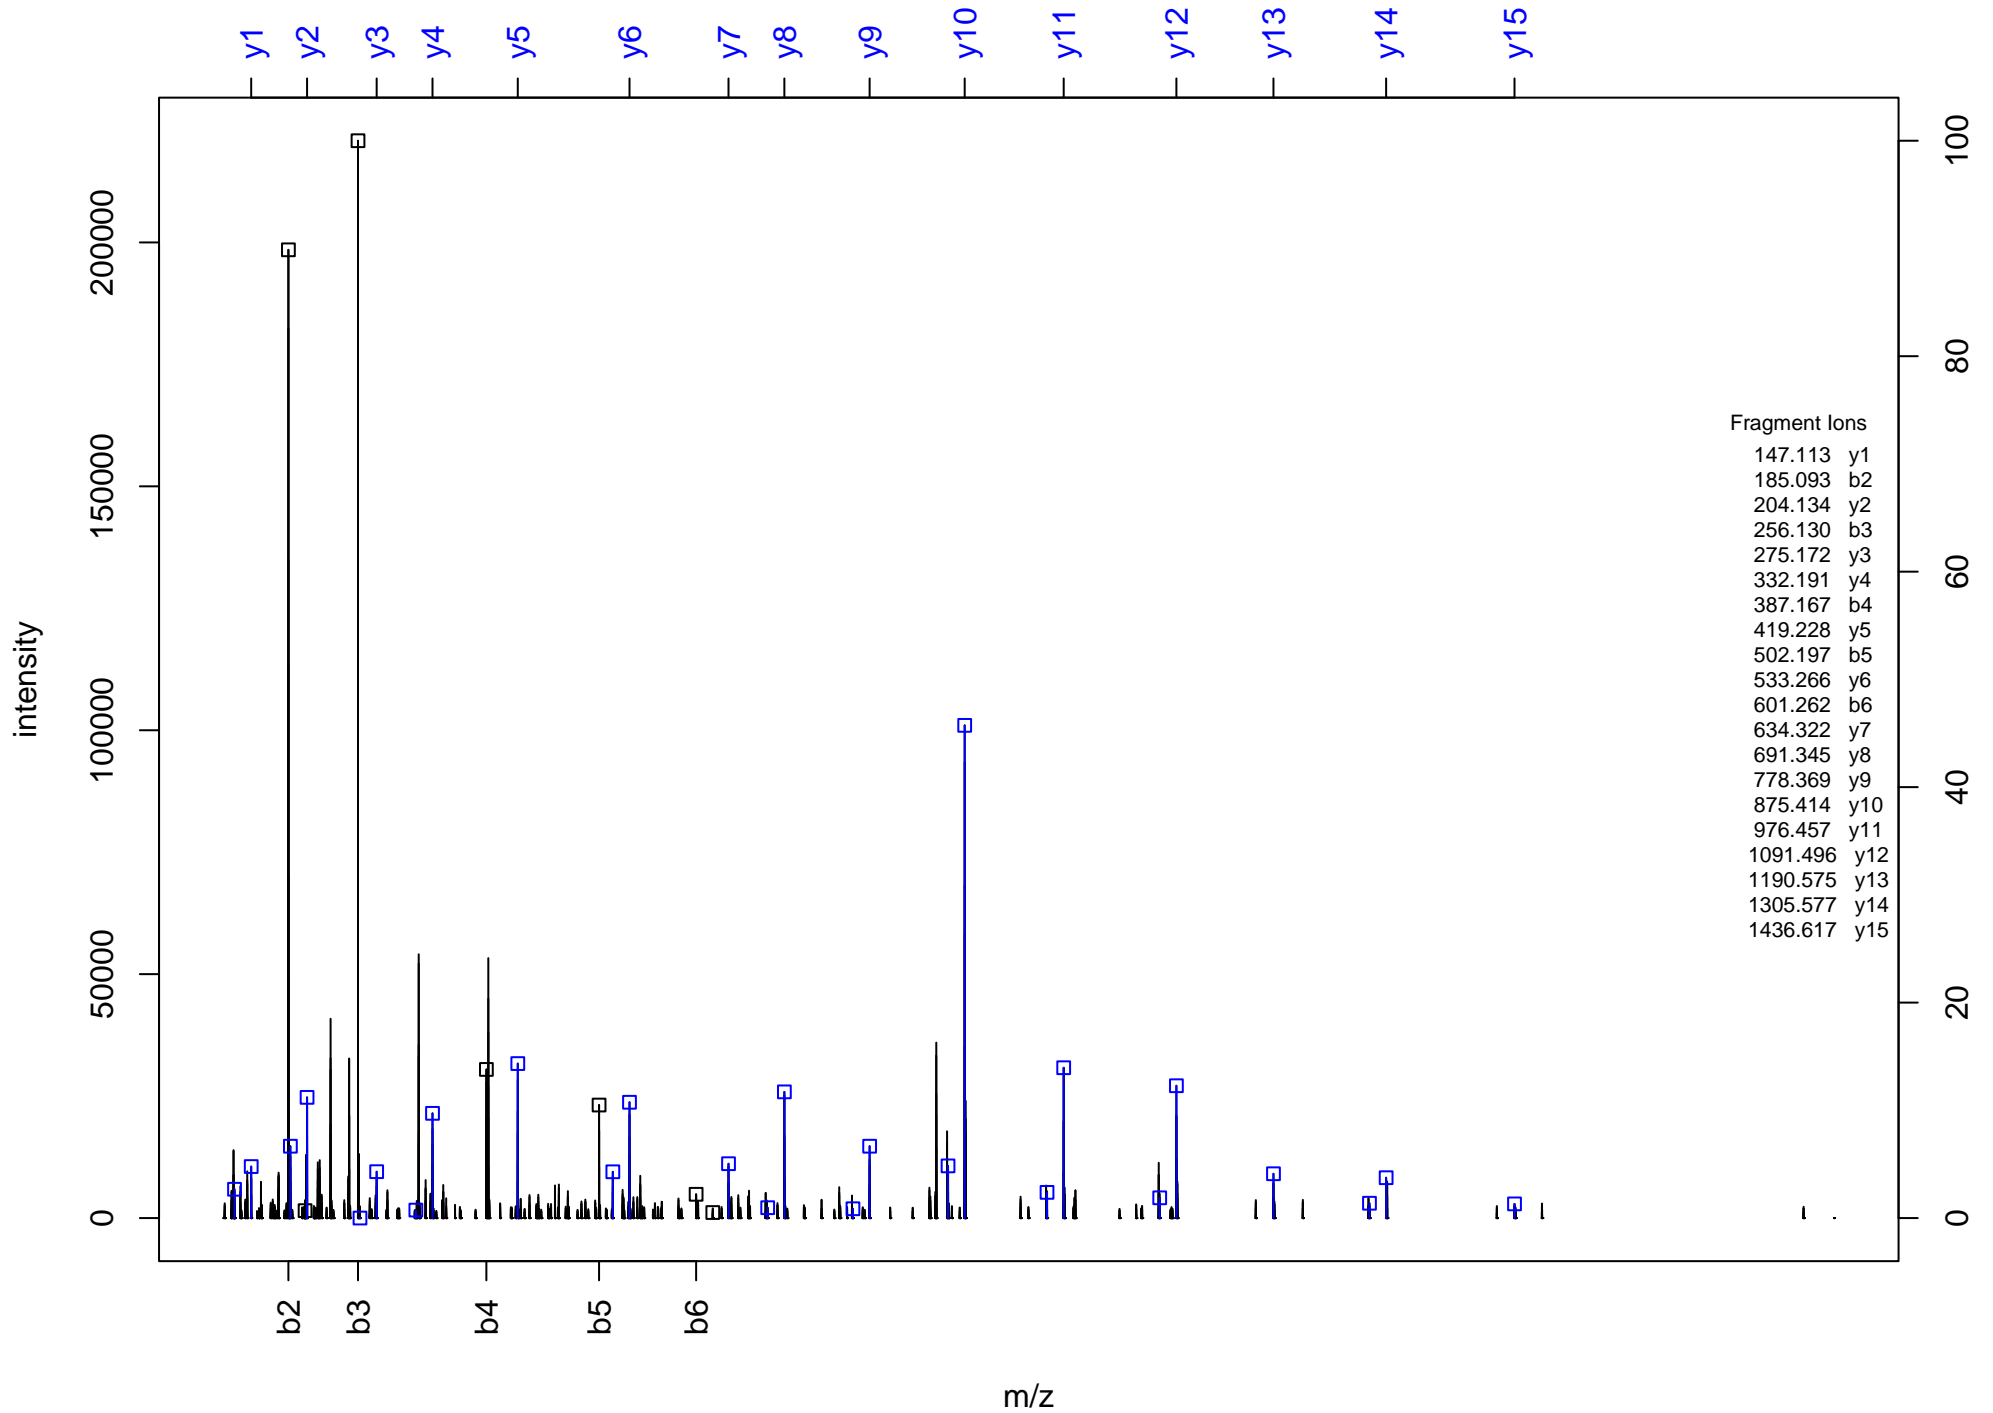

# (Ac)AGILFEDIFDVK

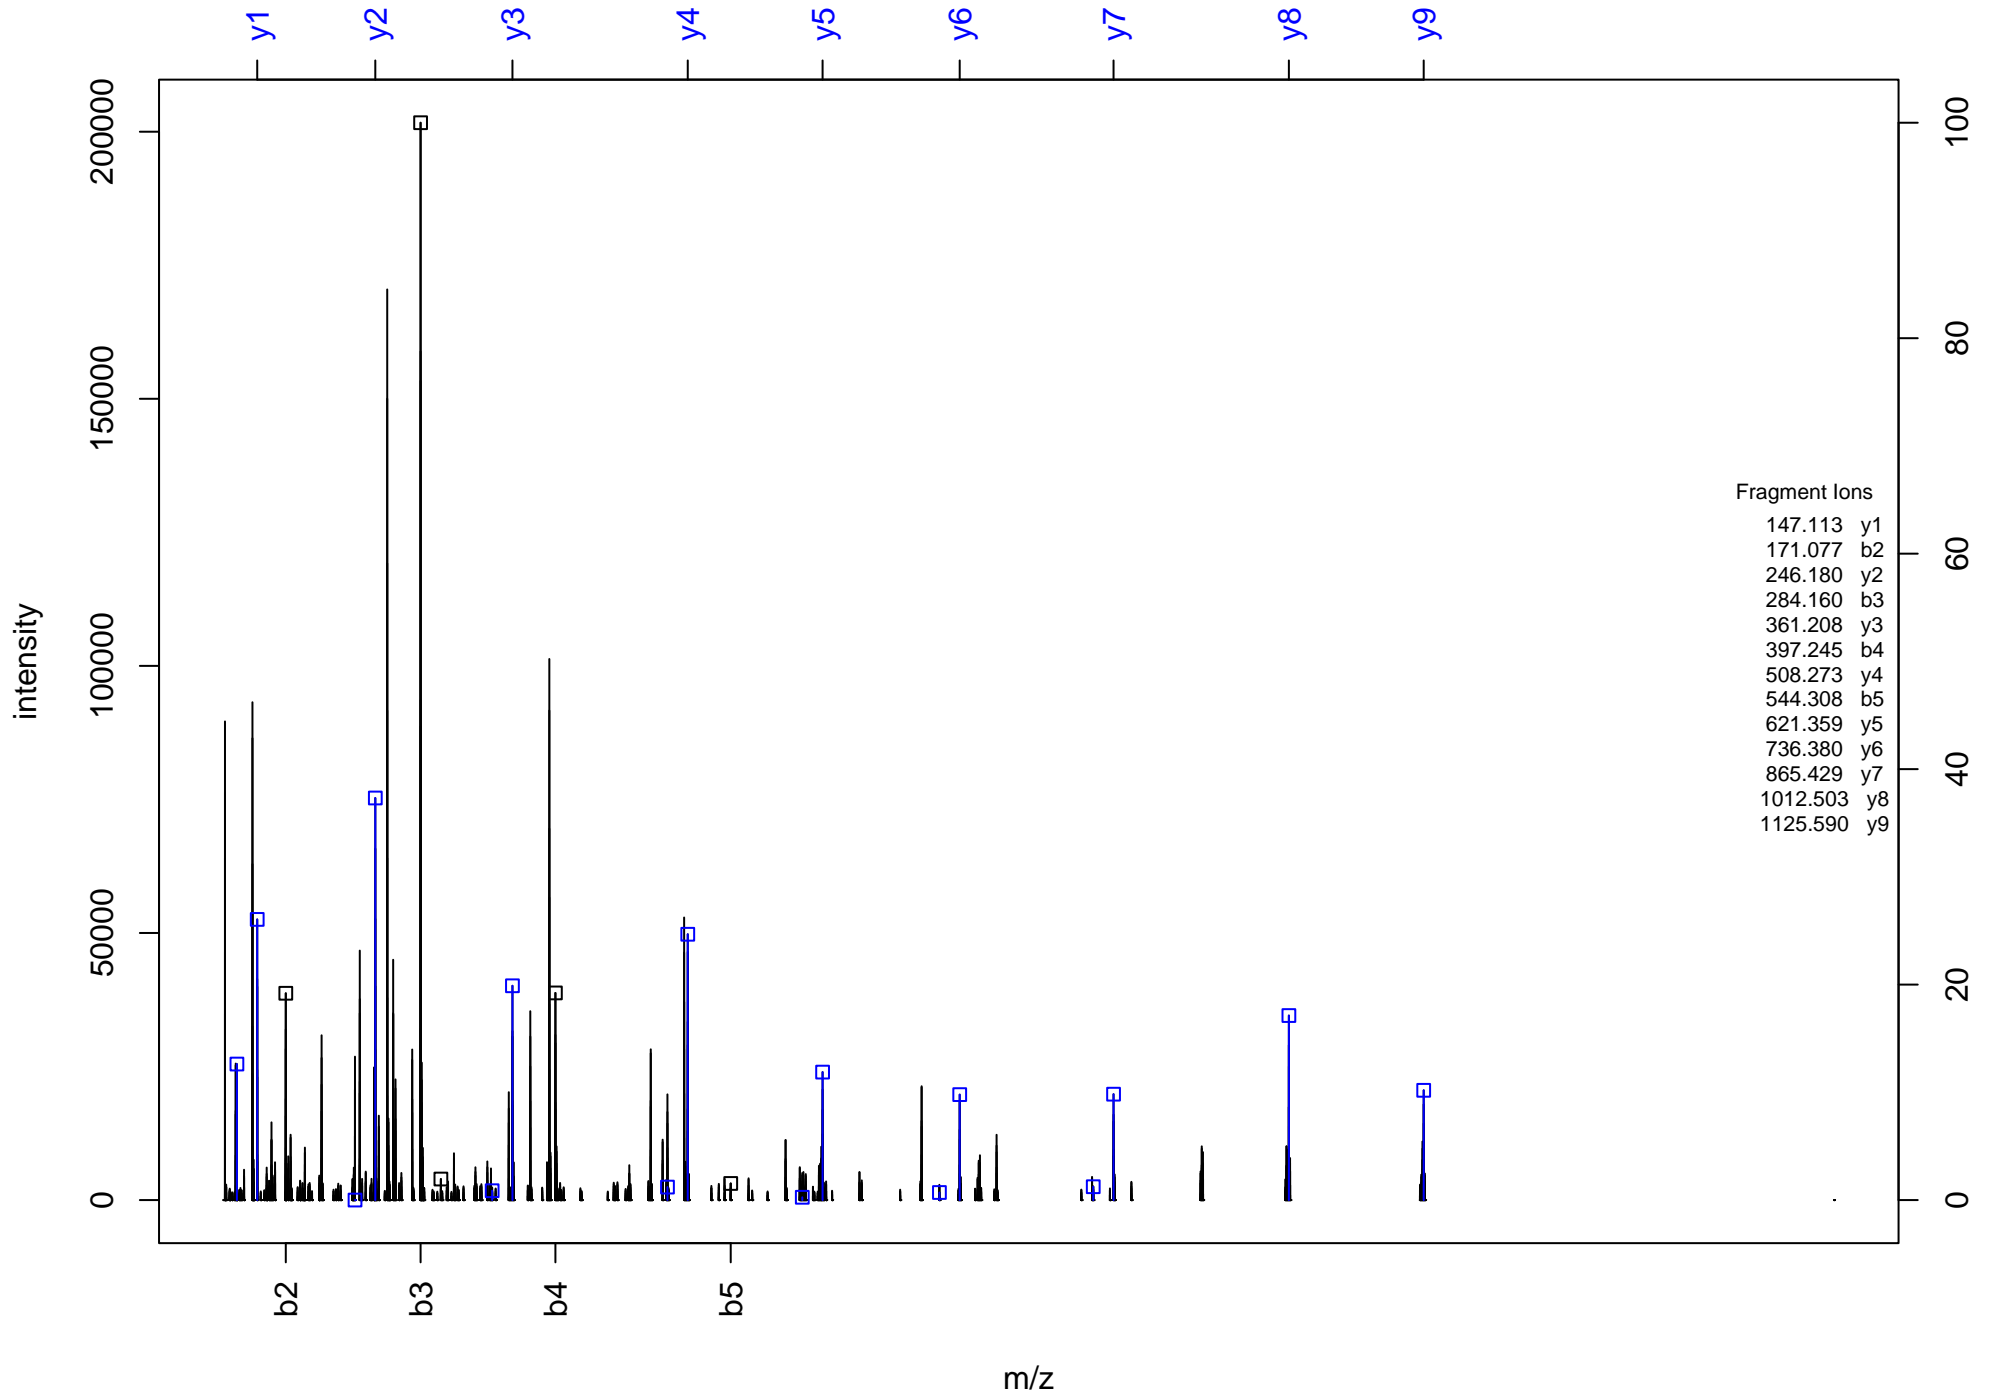

# SPAFQLVELGPGR

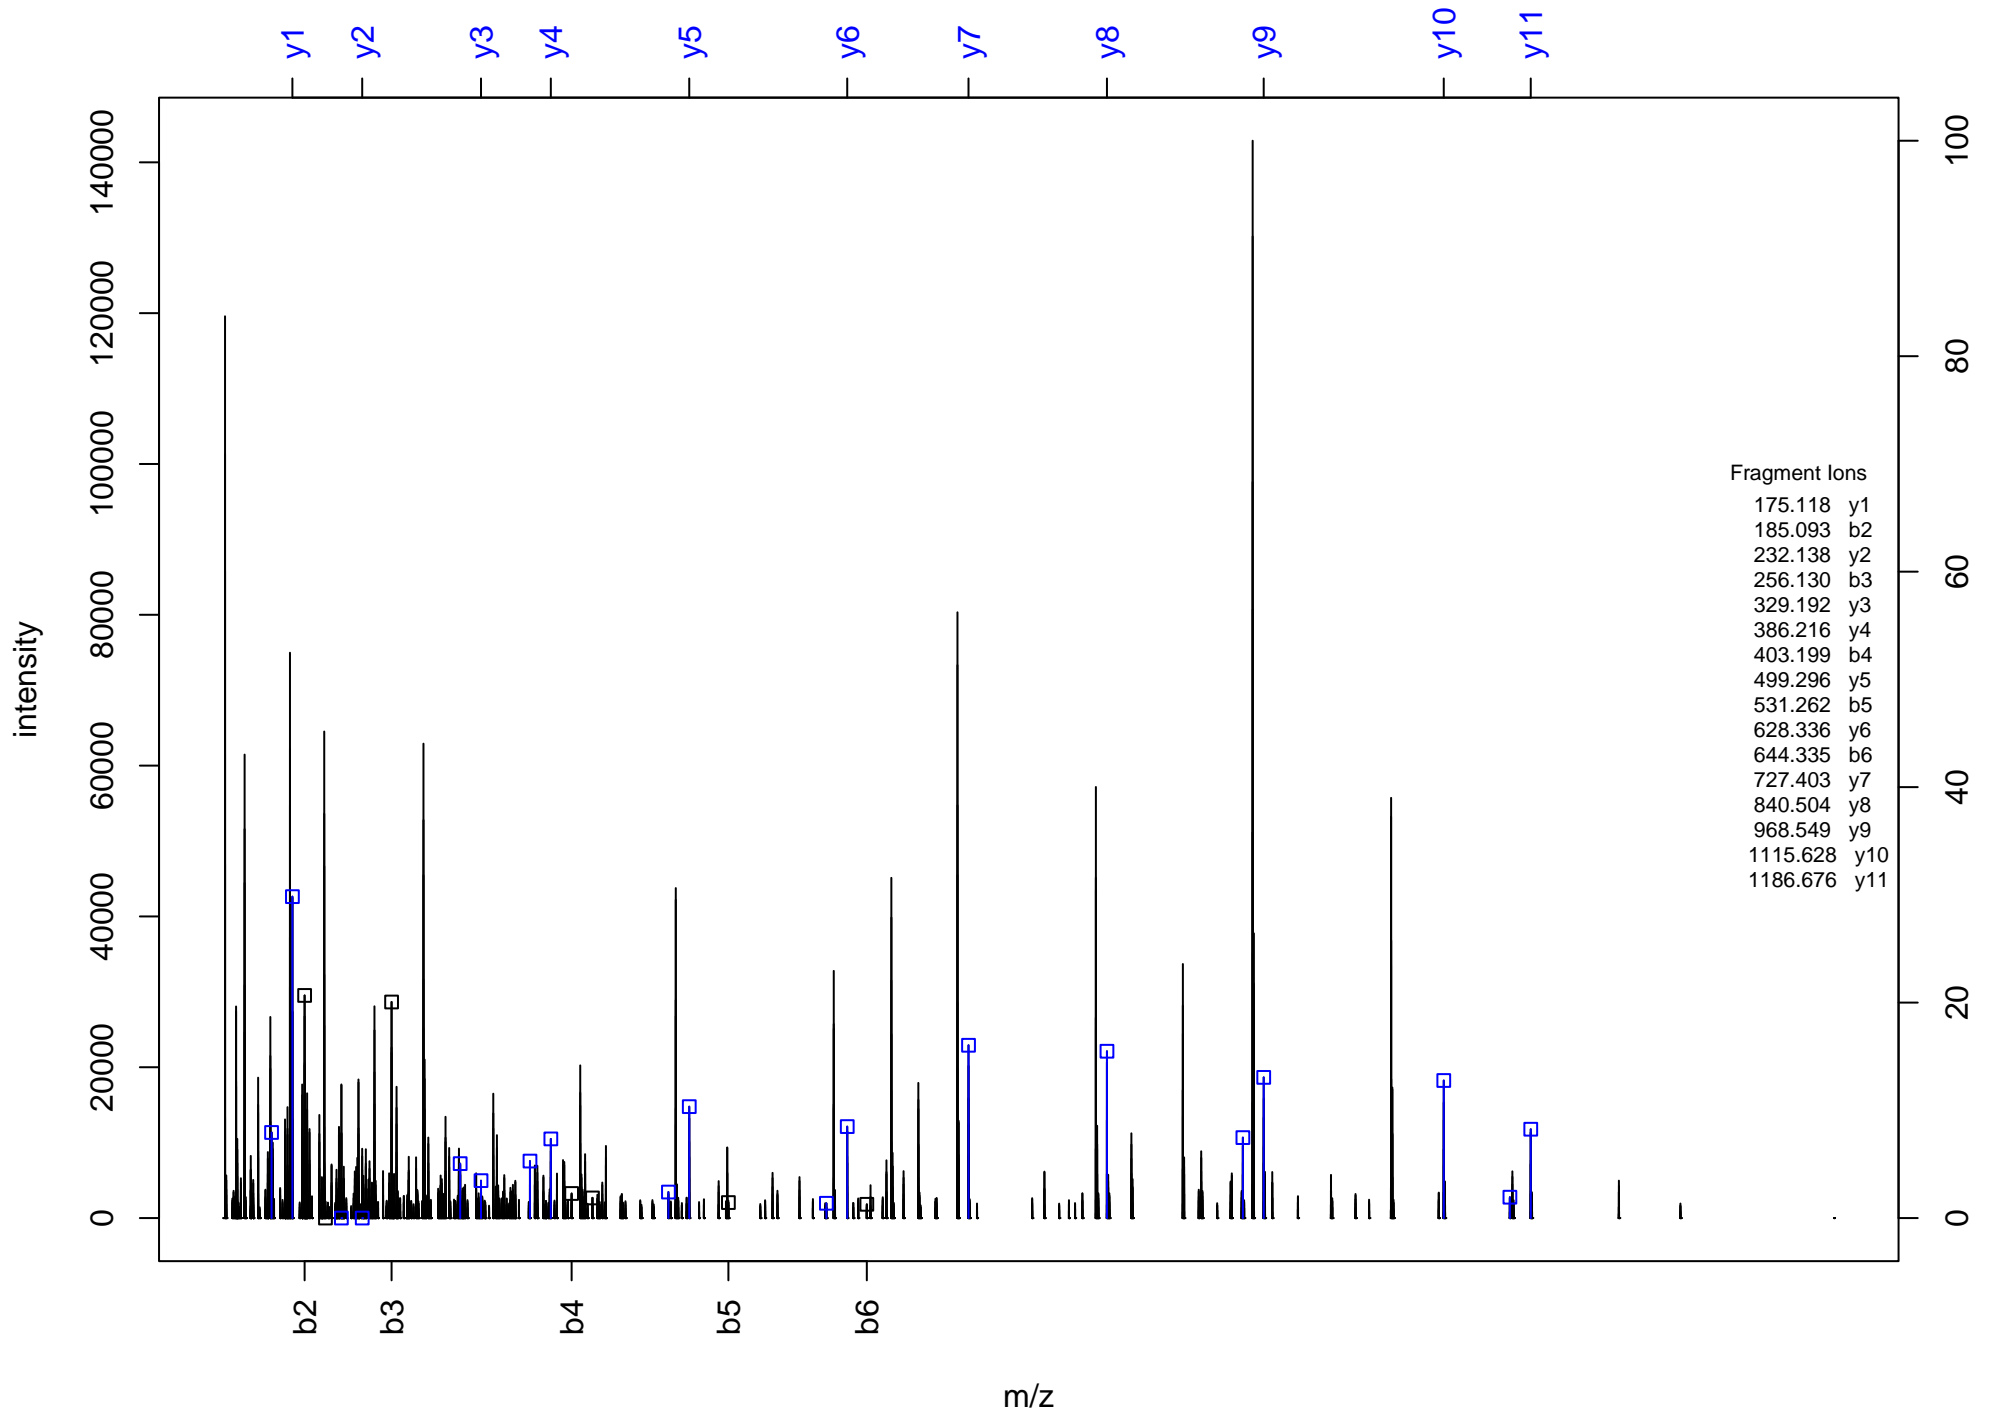



# EIQ<sup>+</sup>Q<sup>+</sup>GVESWIALGN<sup>+</sup>R

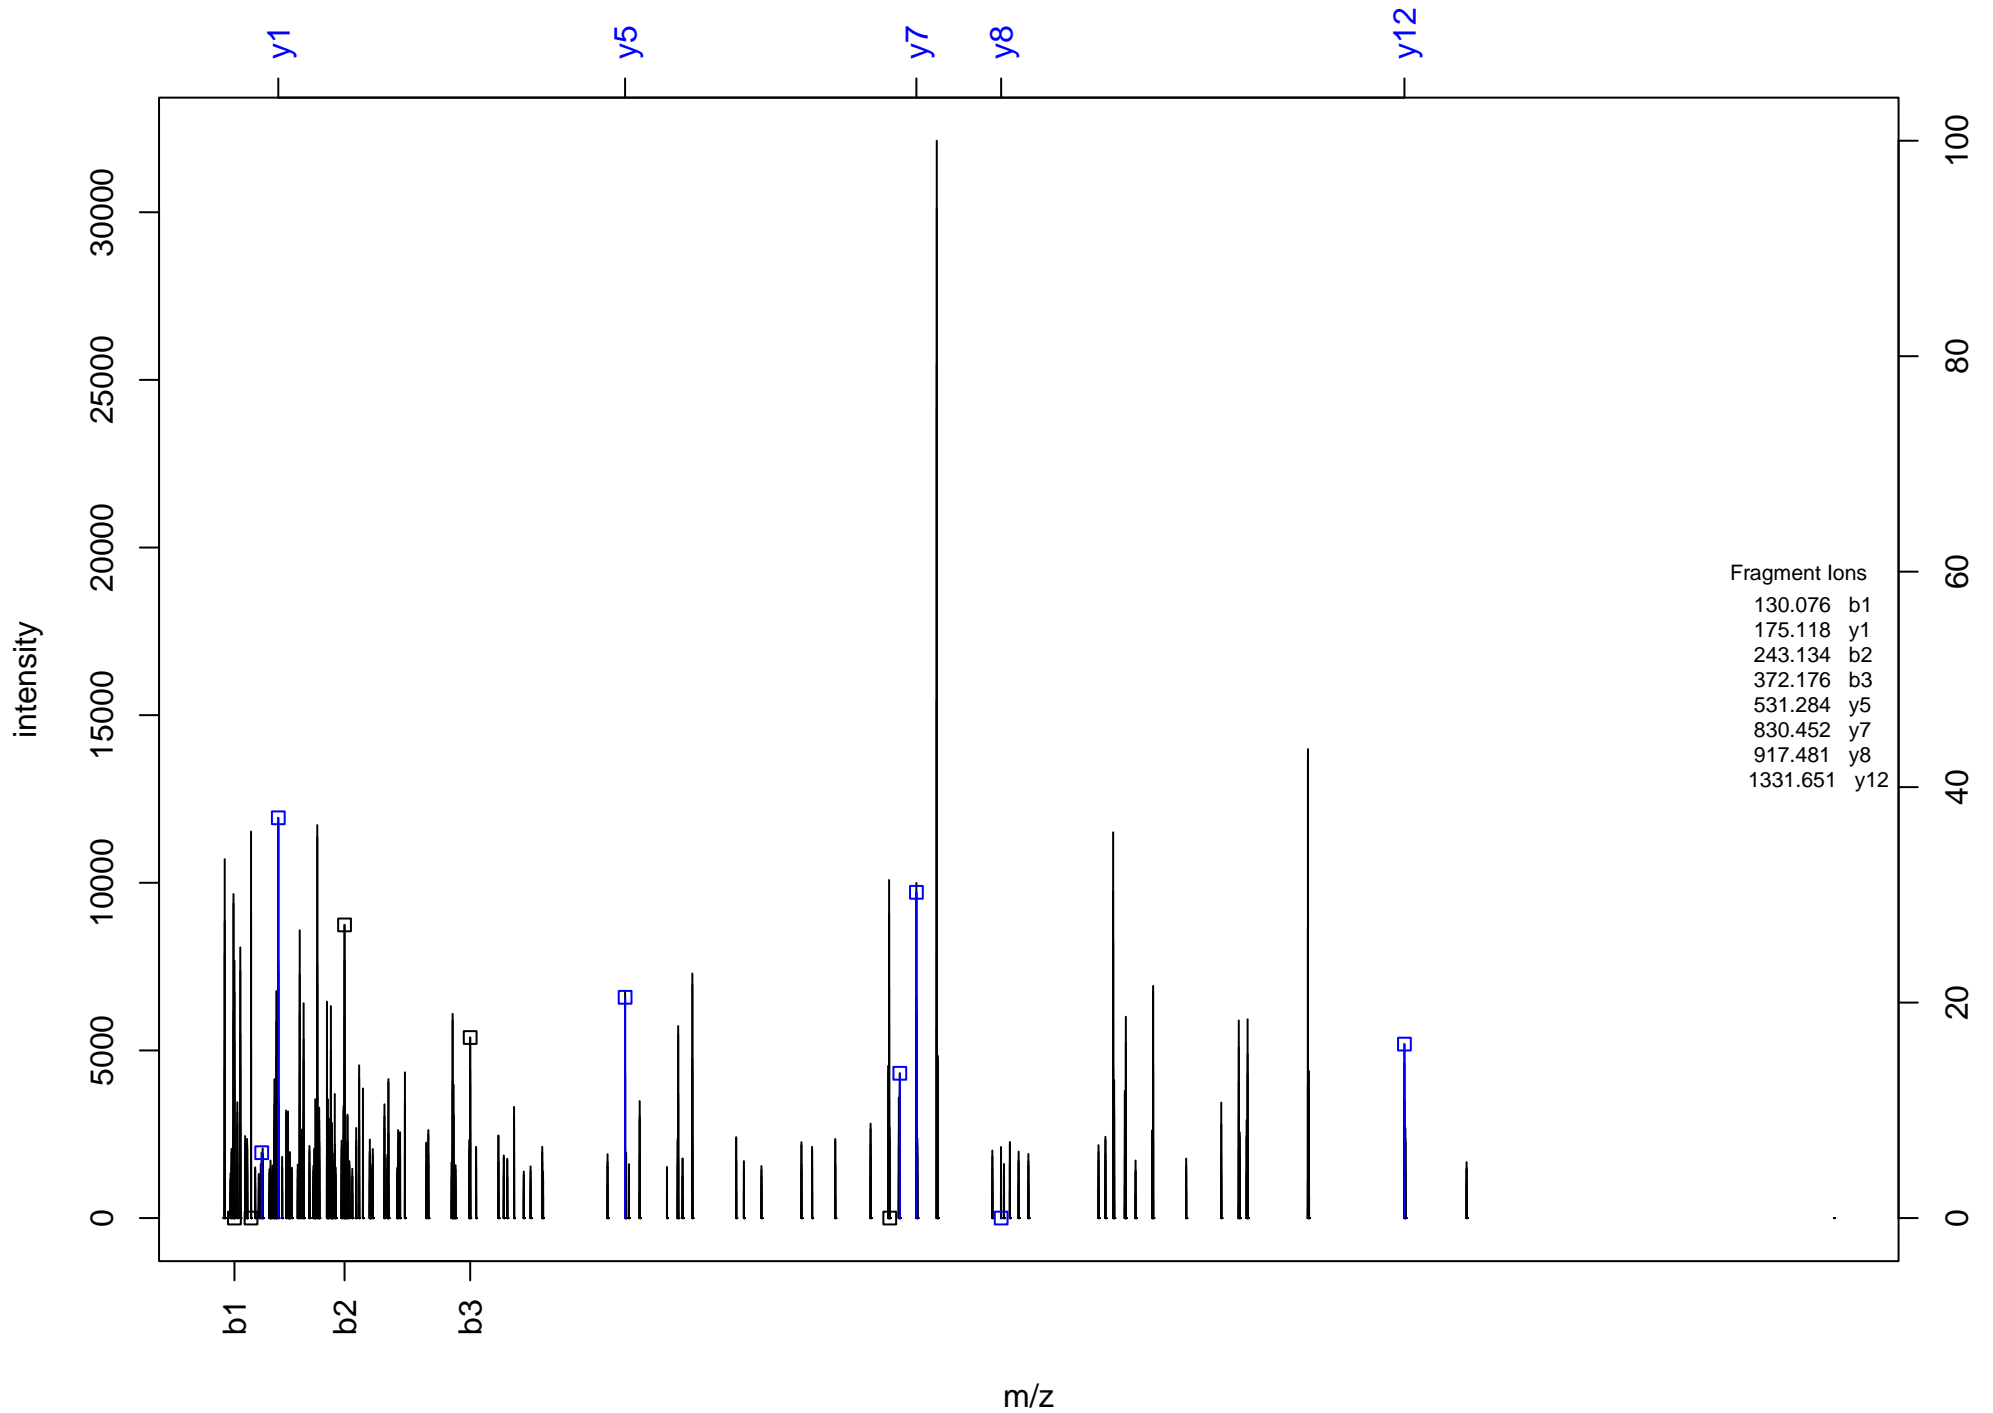

# LEFSVNR

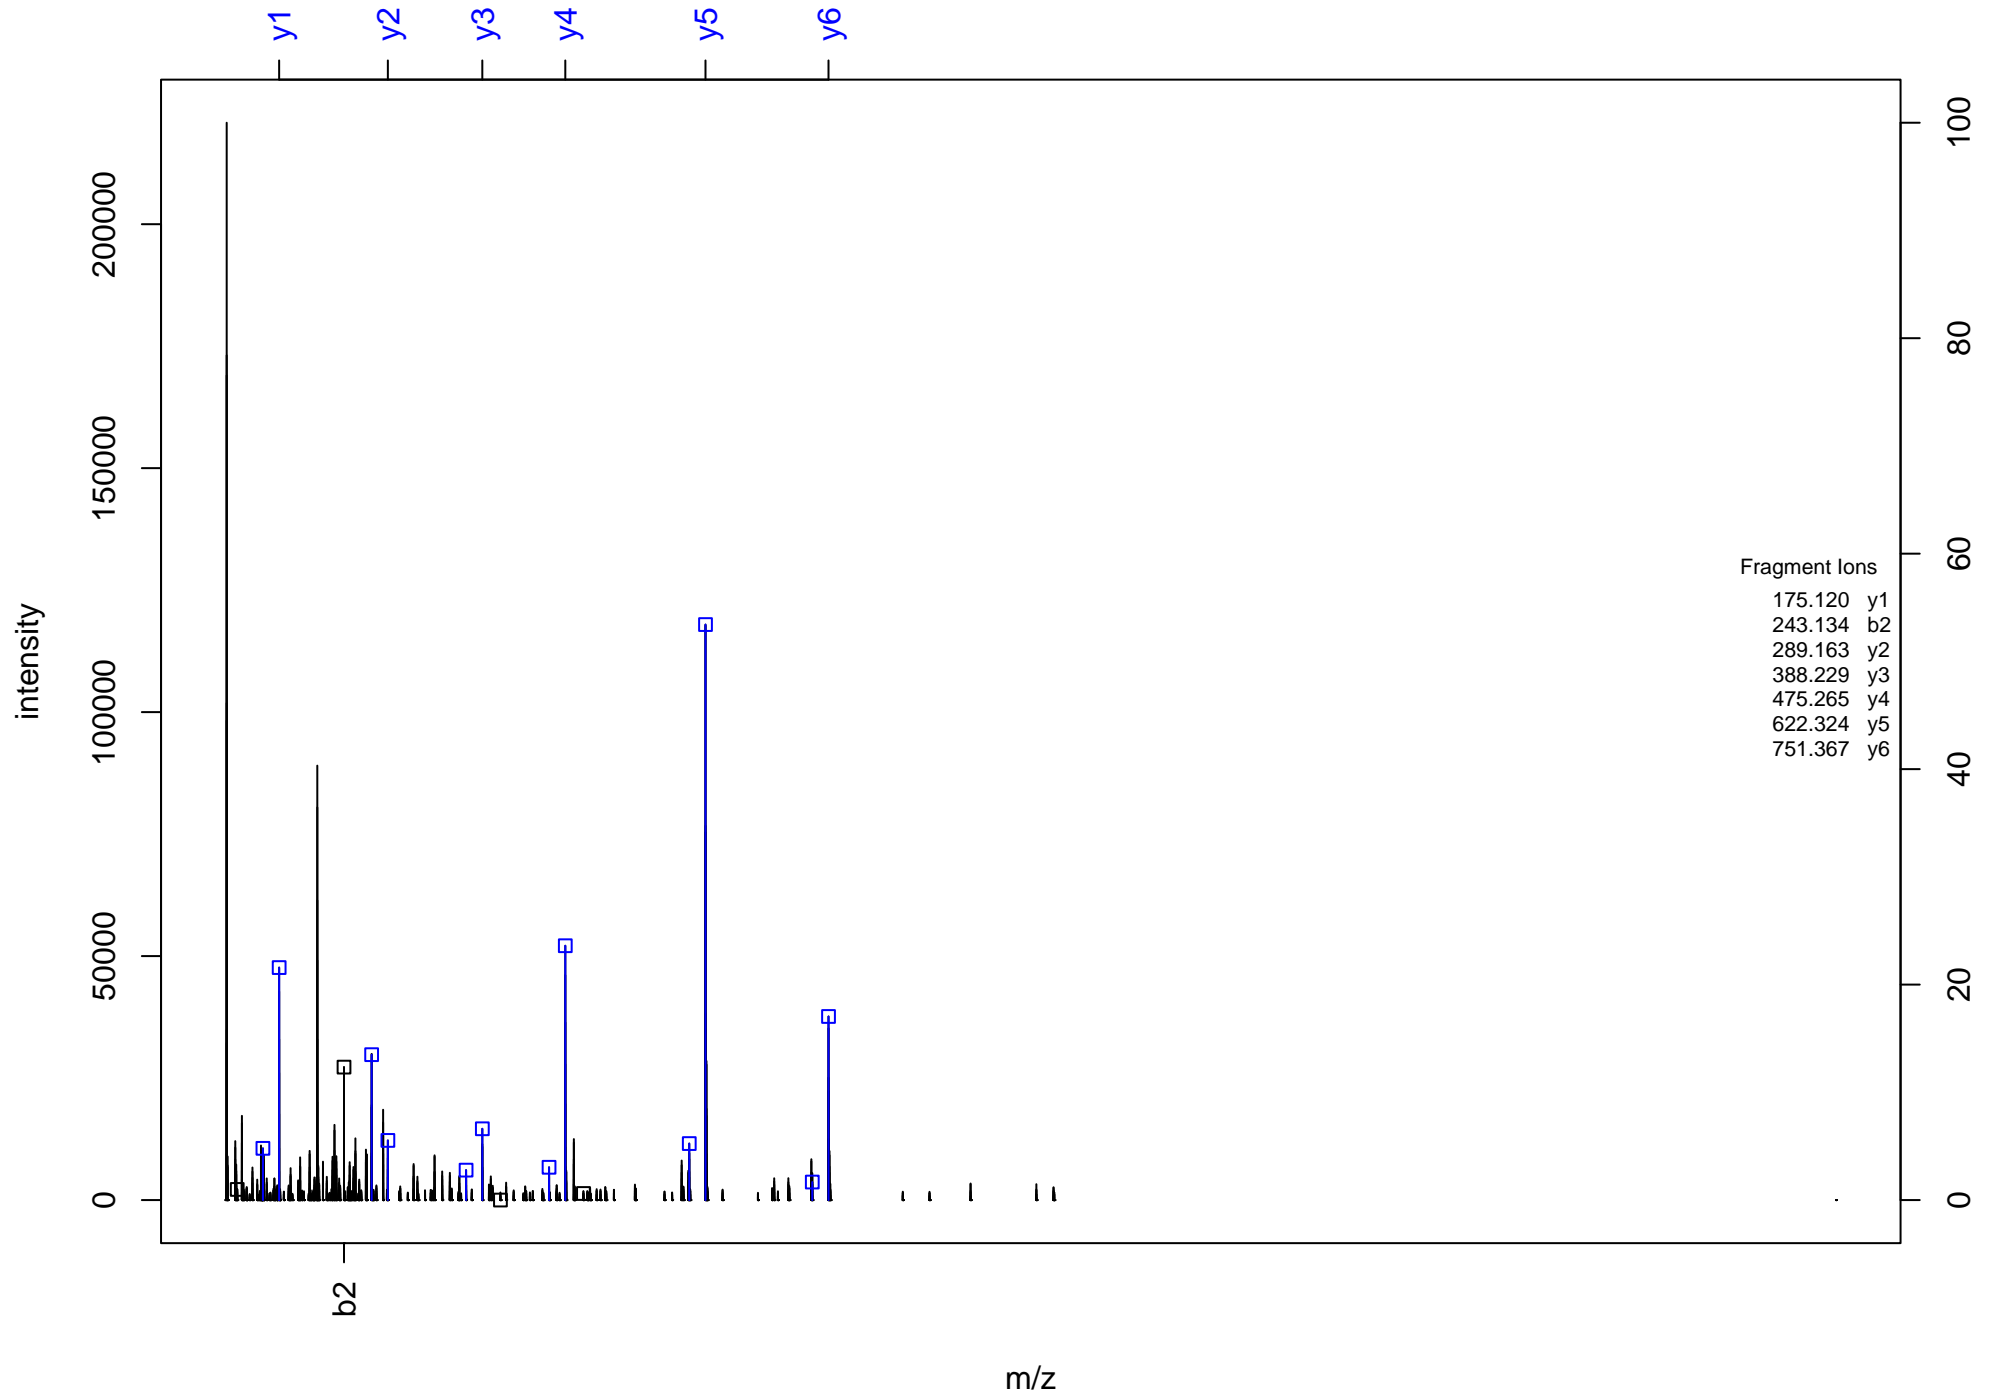

# N<sup>^</sup>AALNLVNSQNR

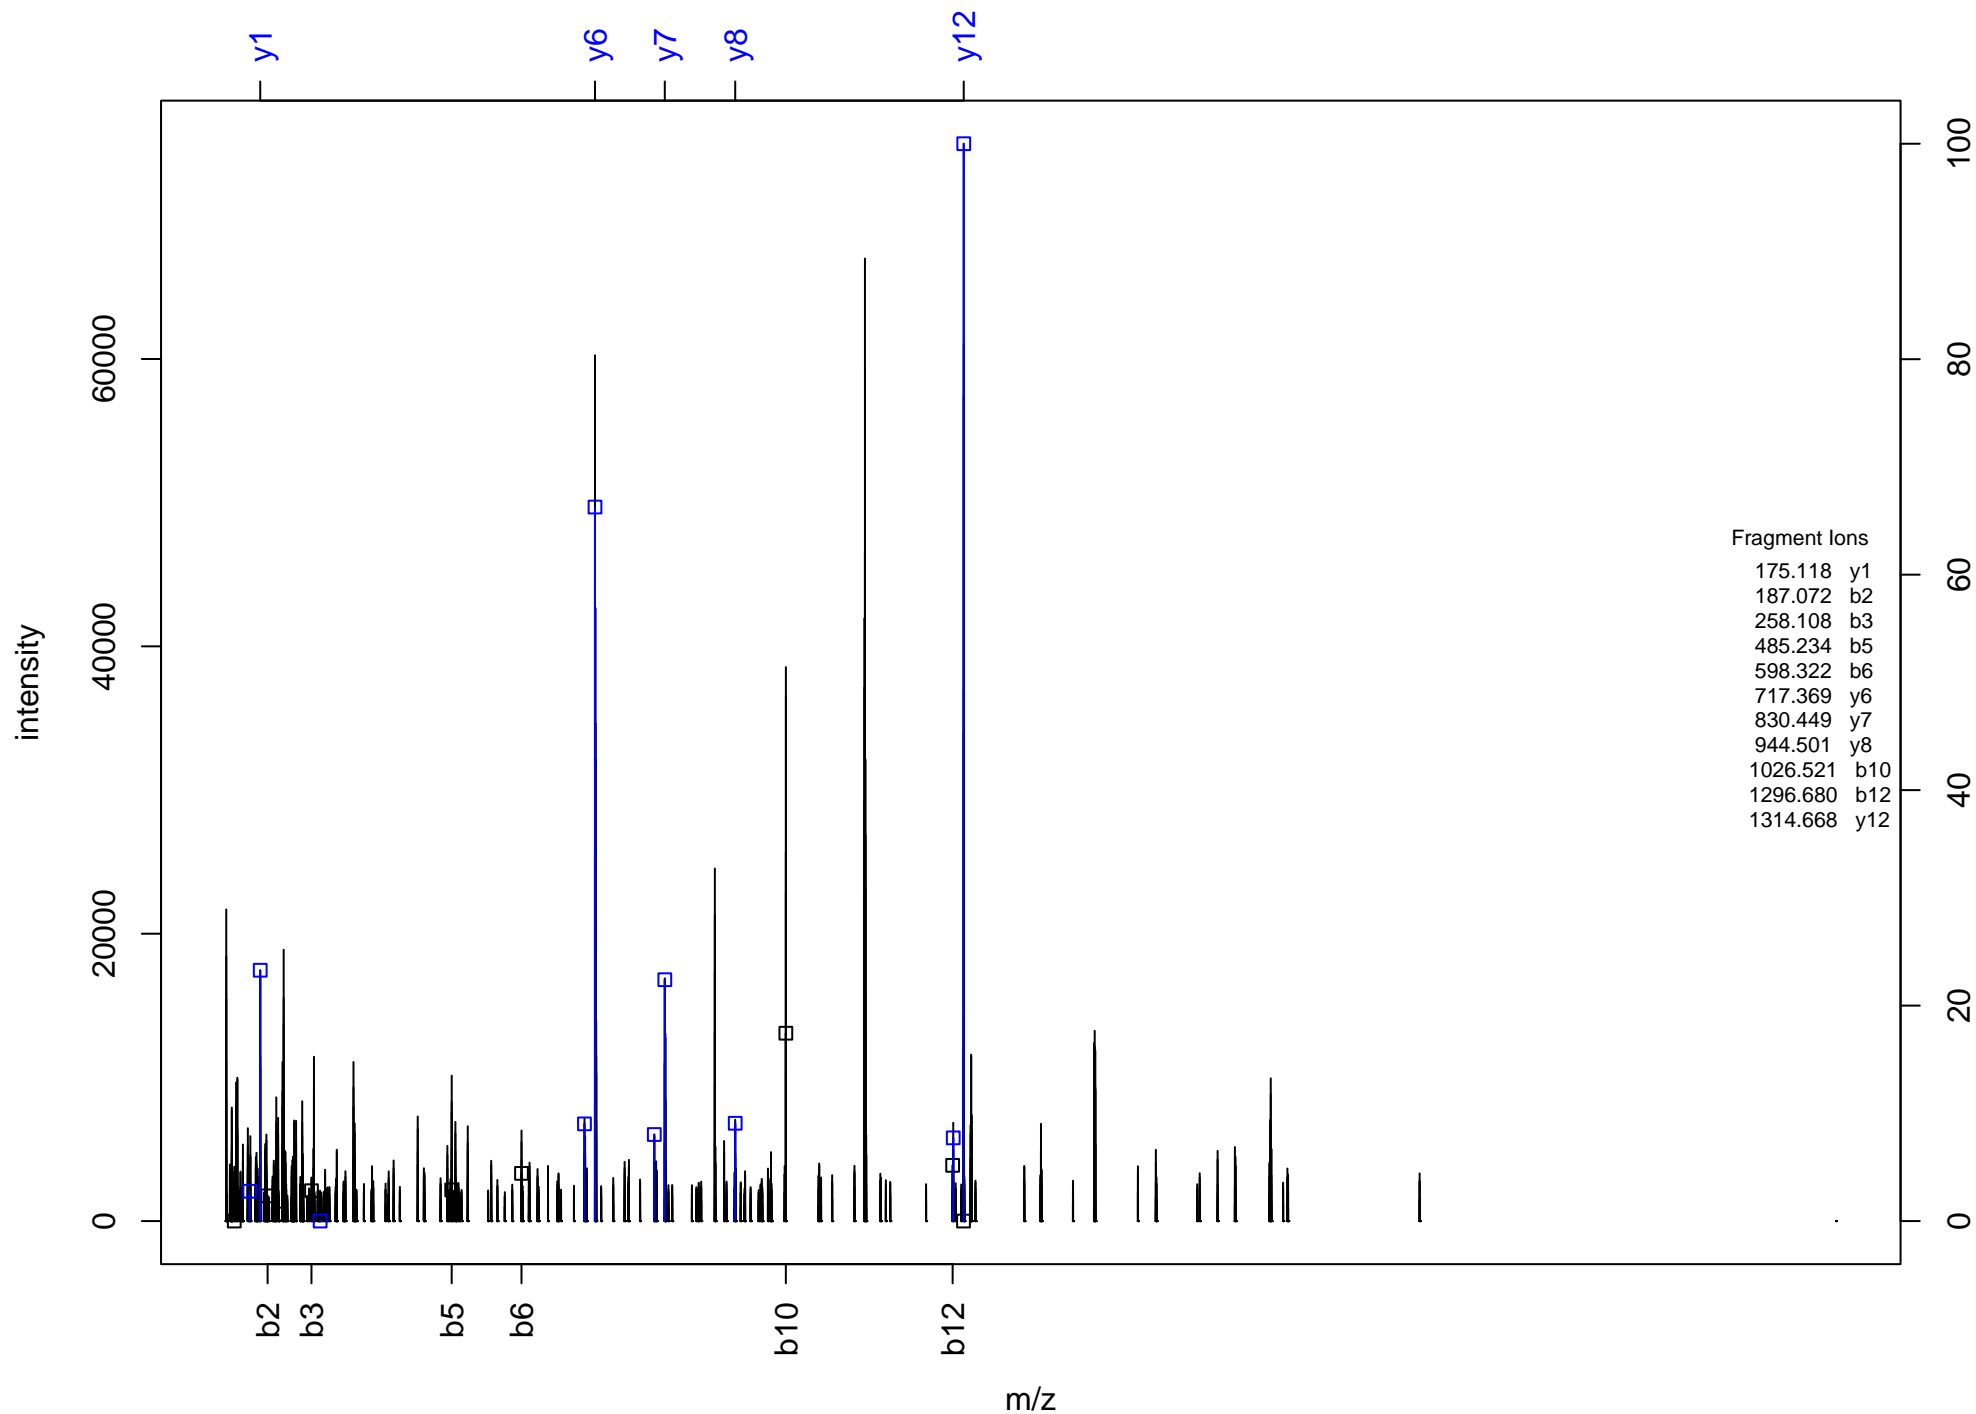

# (Ac)AGILAWFWNER

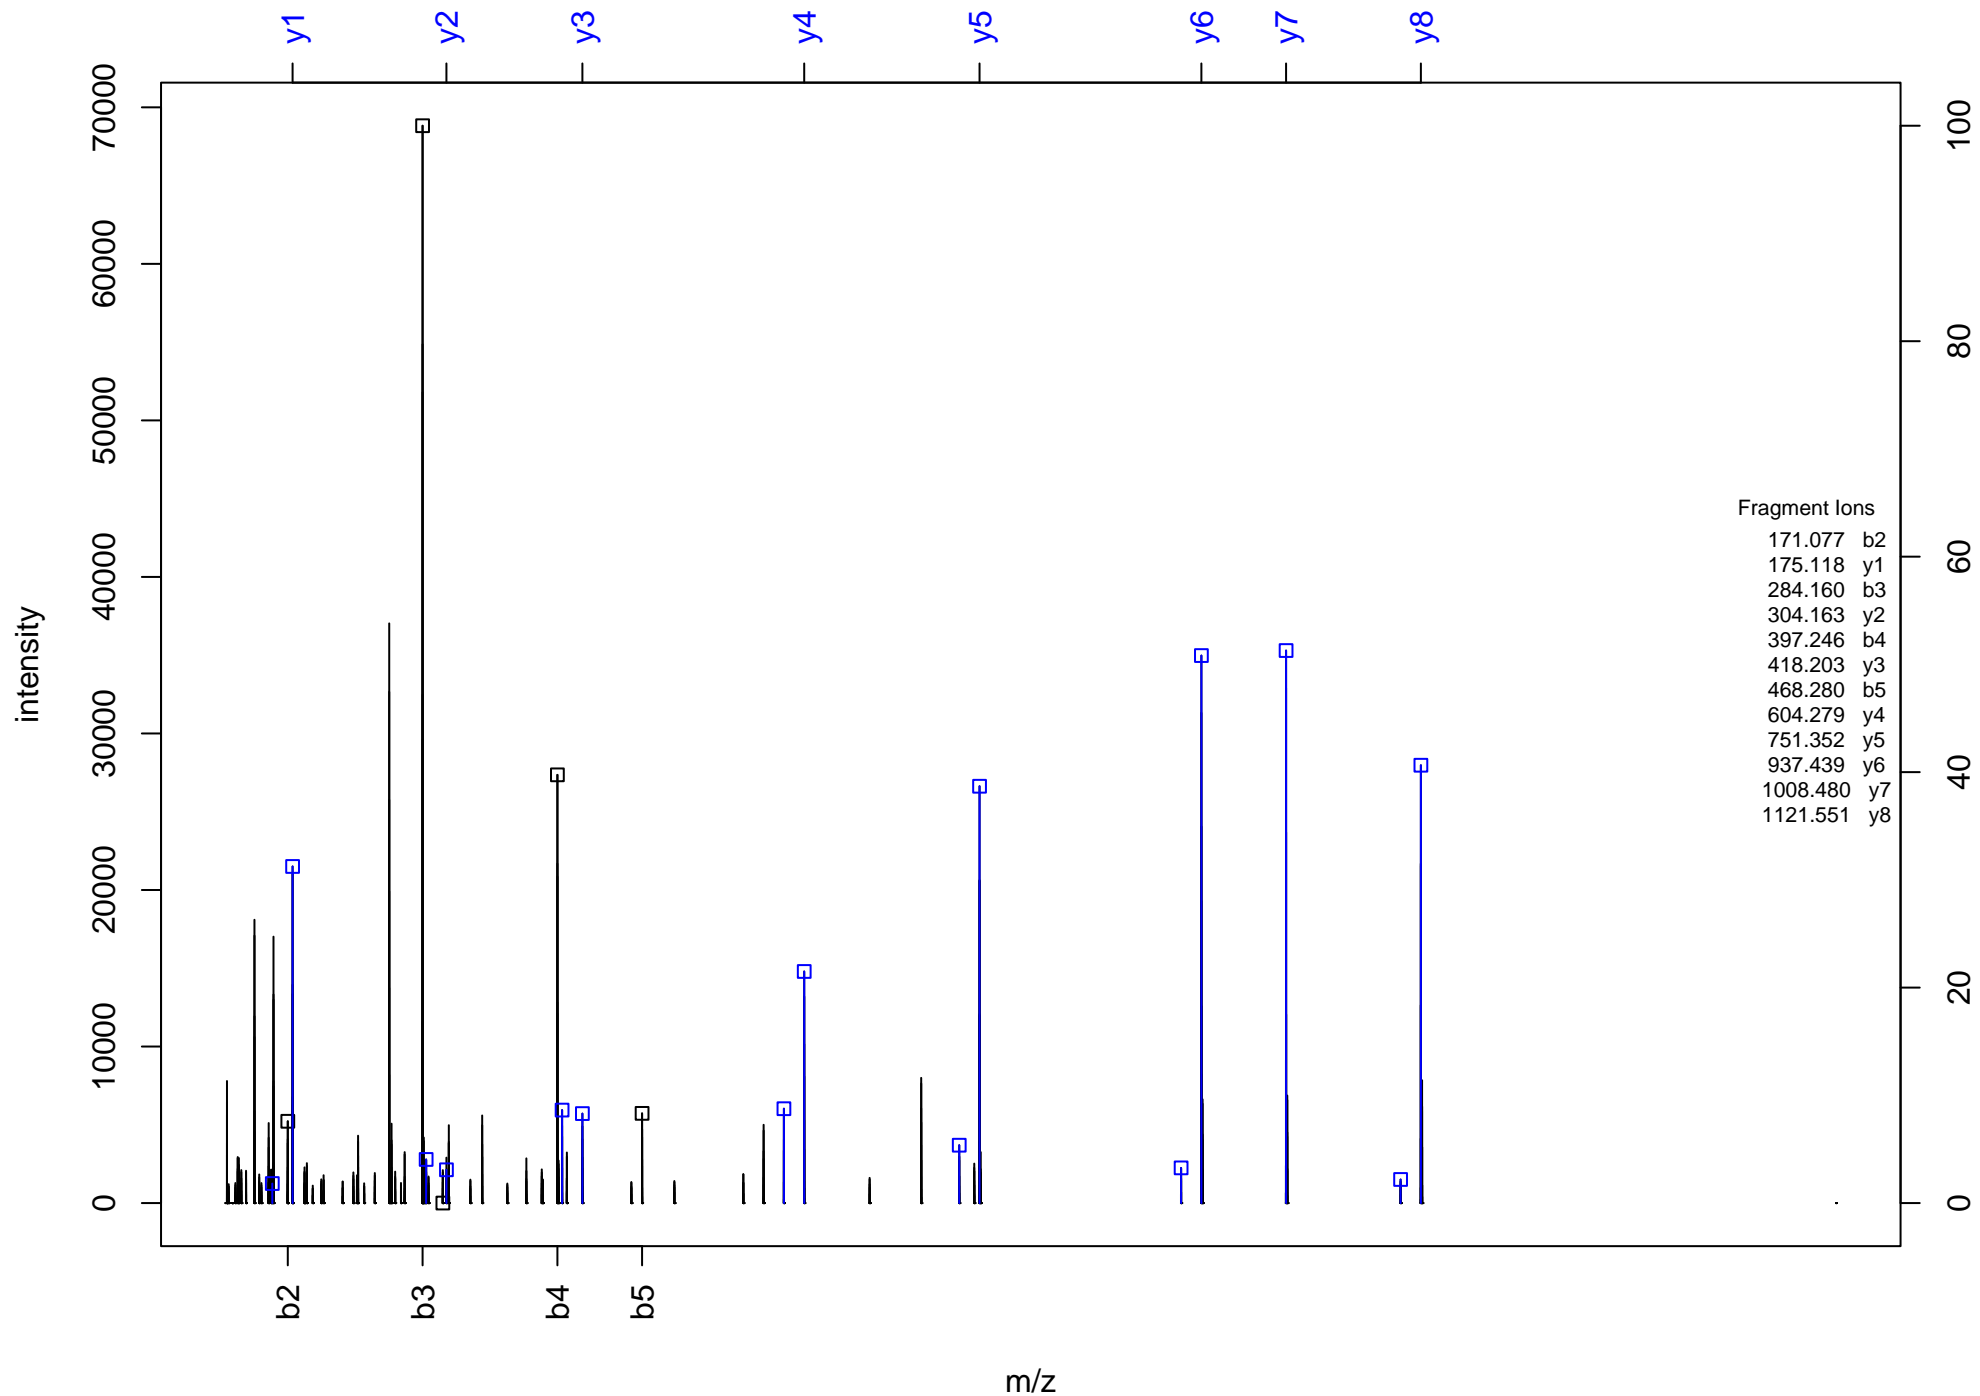

# LFGEESCDFLSTFK

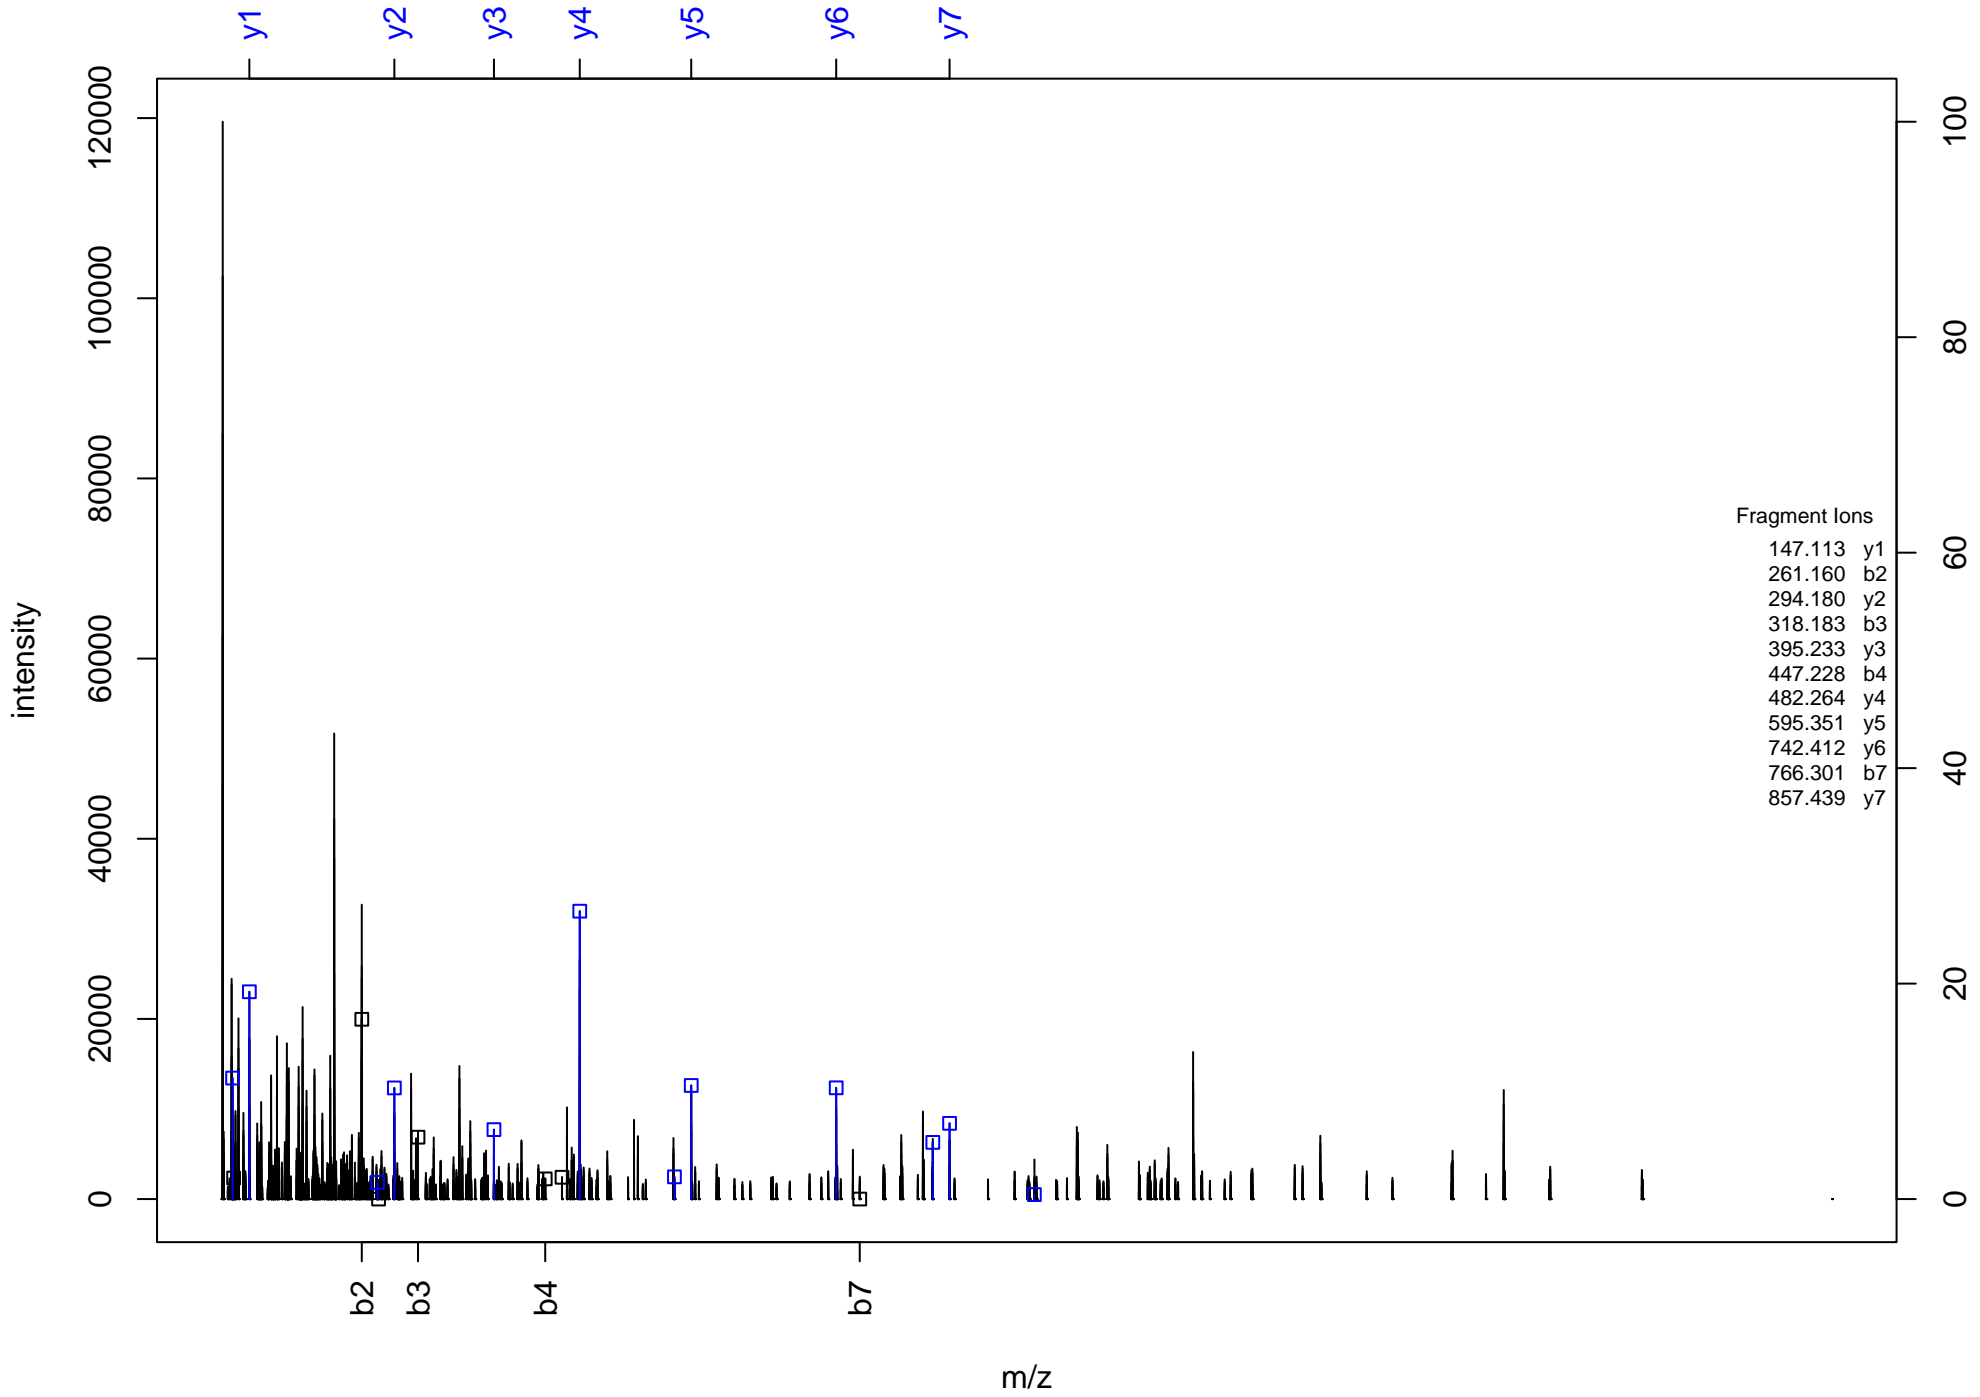

# ADQFANEWGR

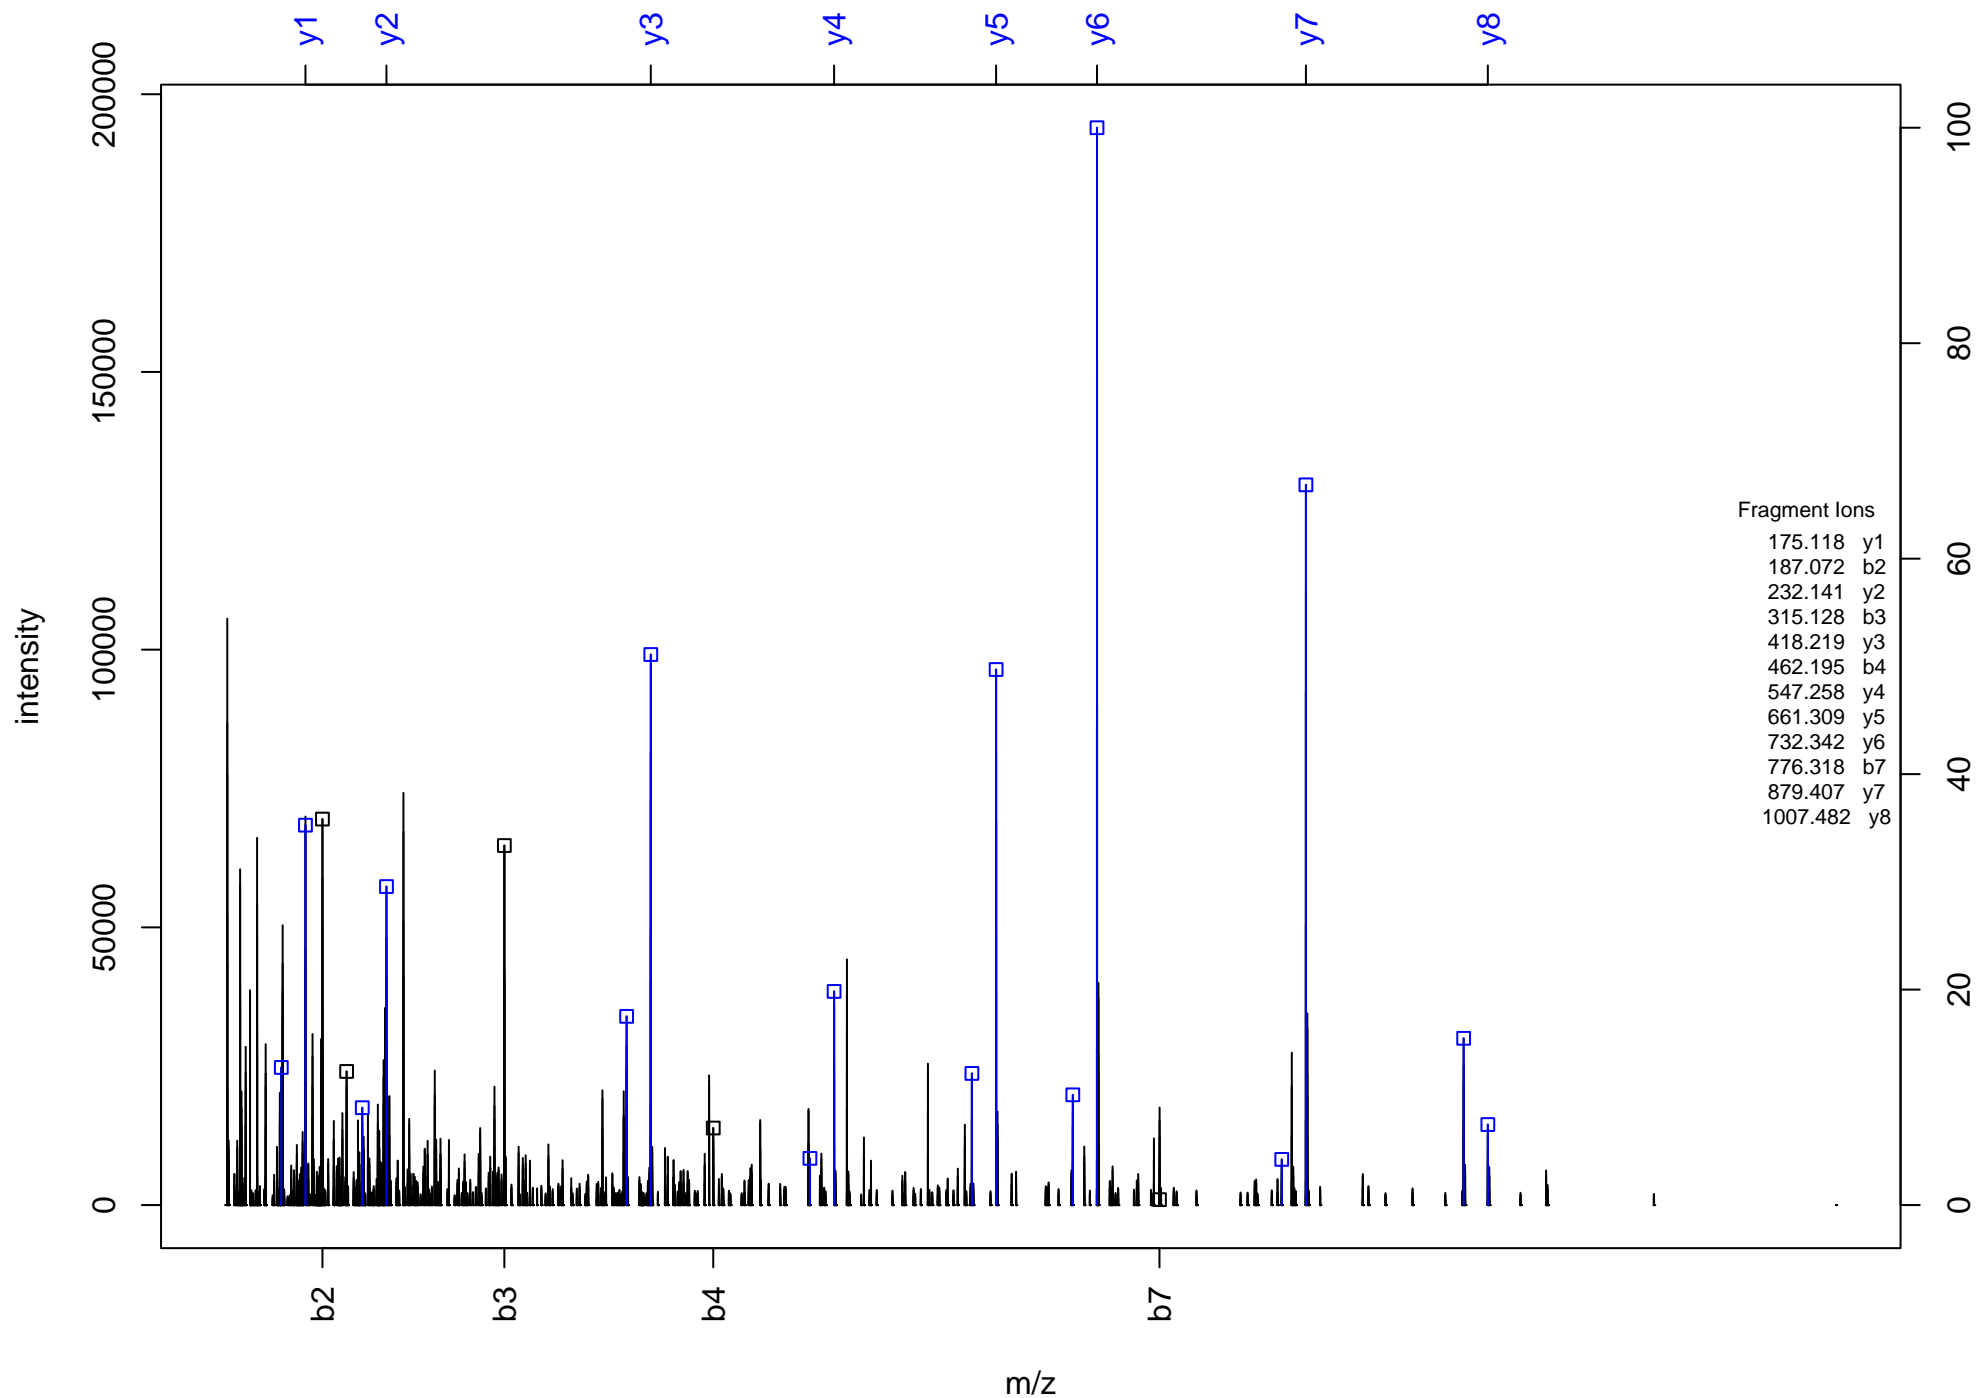

# ILFDGIPLEK

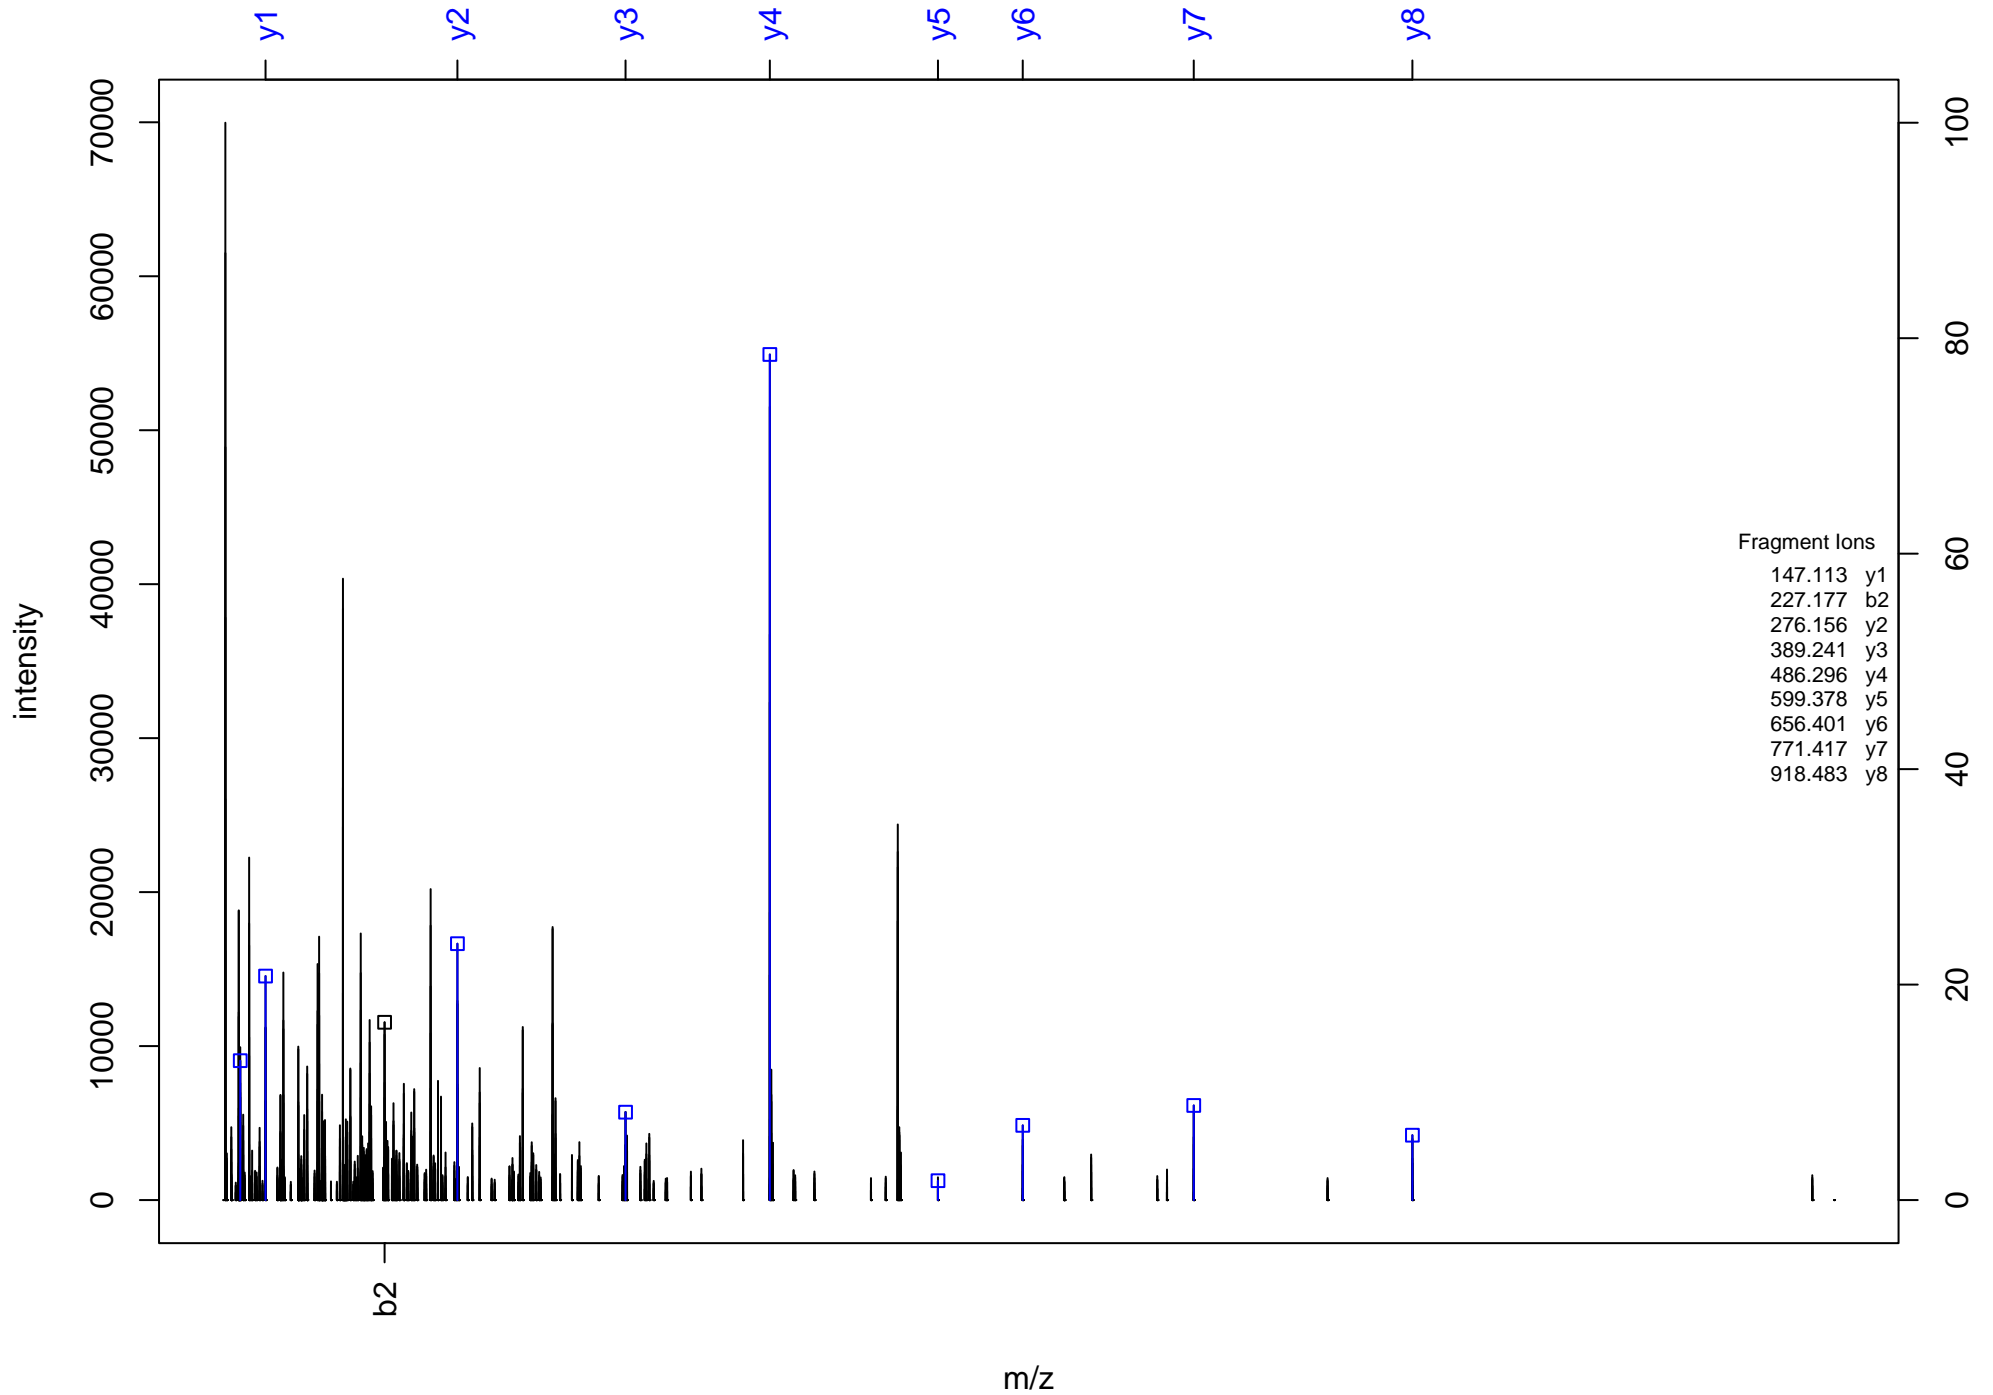

# (Ac)SDKPDMAEIEK

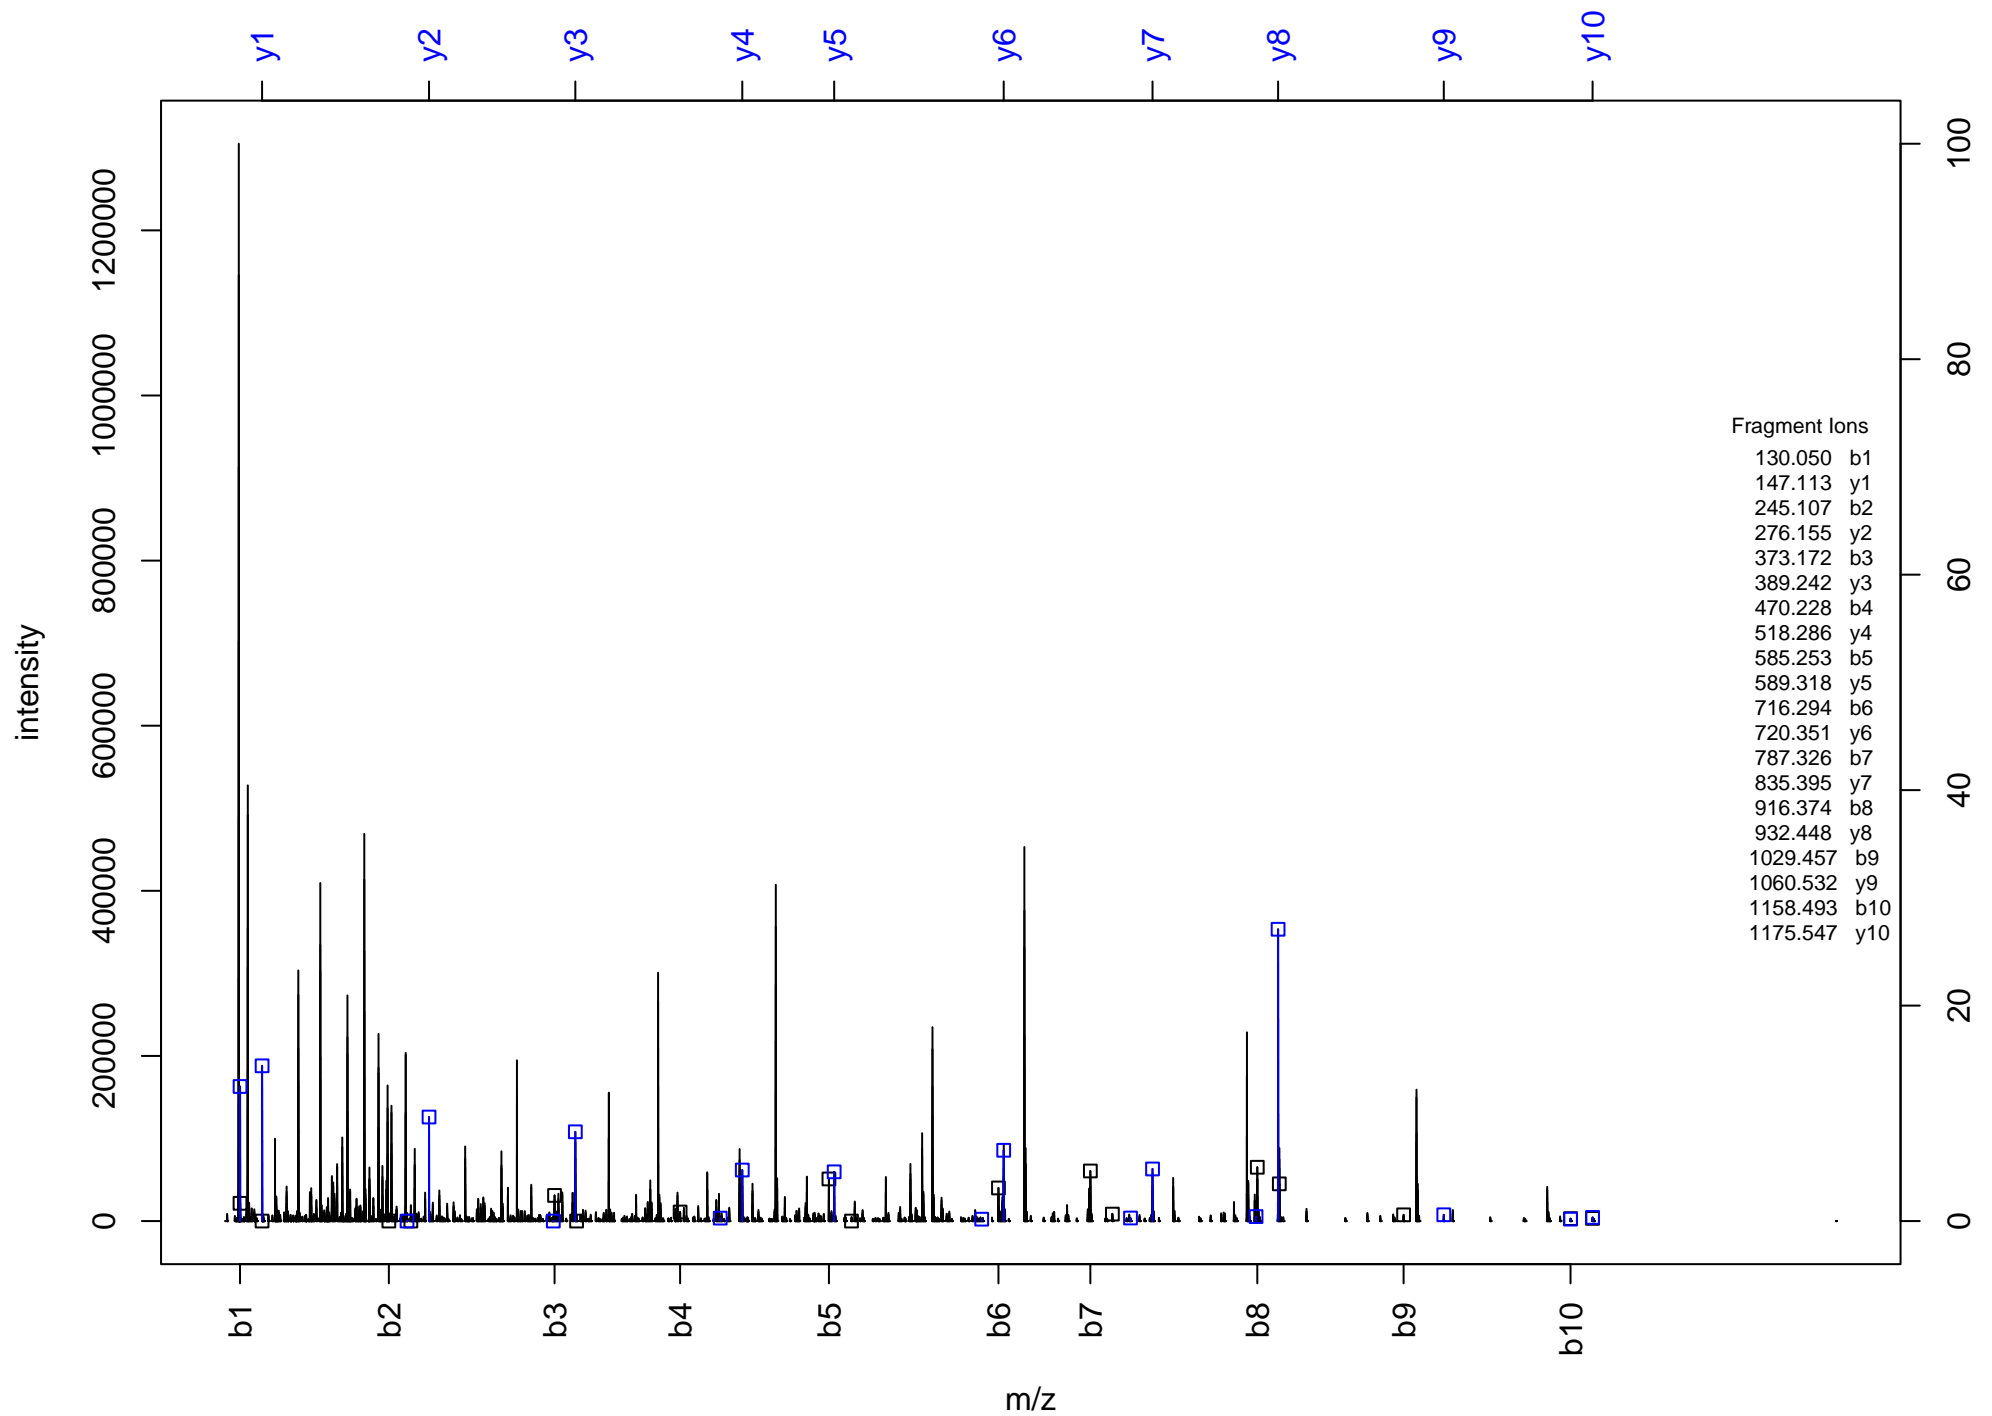



# VN^GMDILCVR

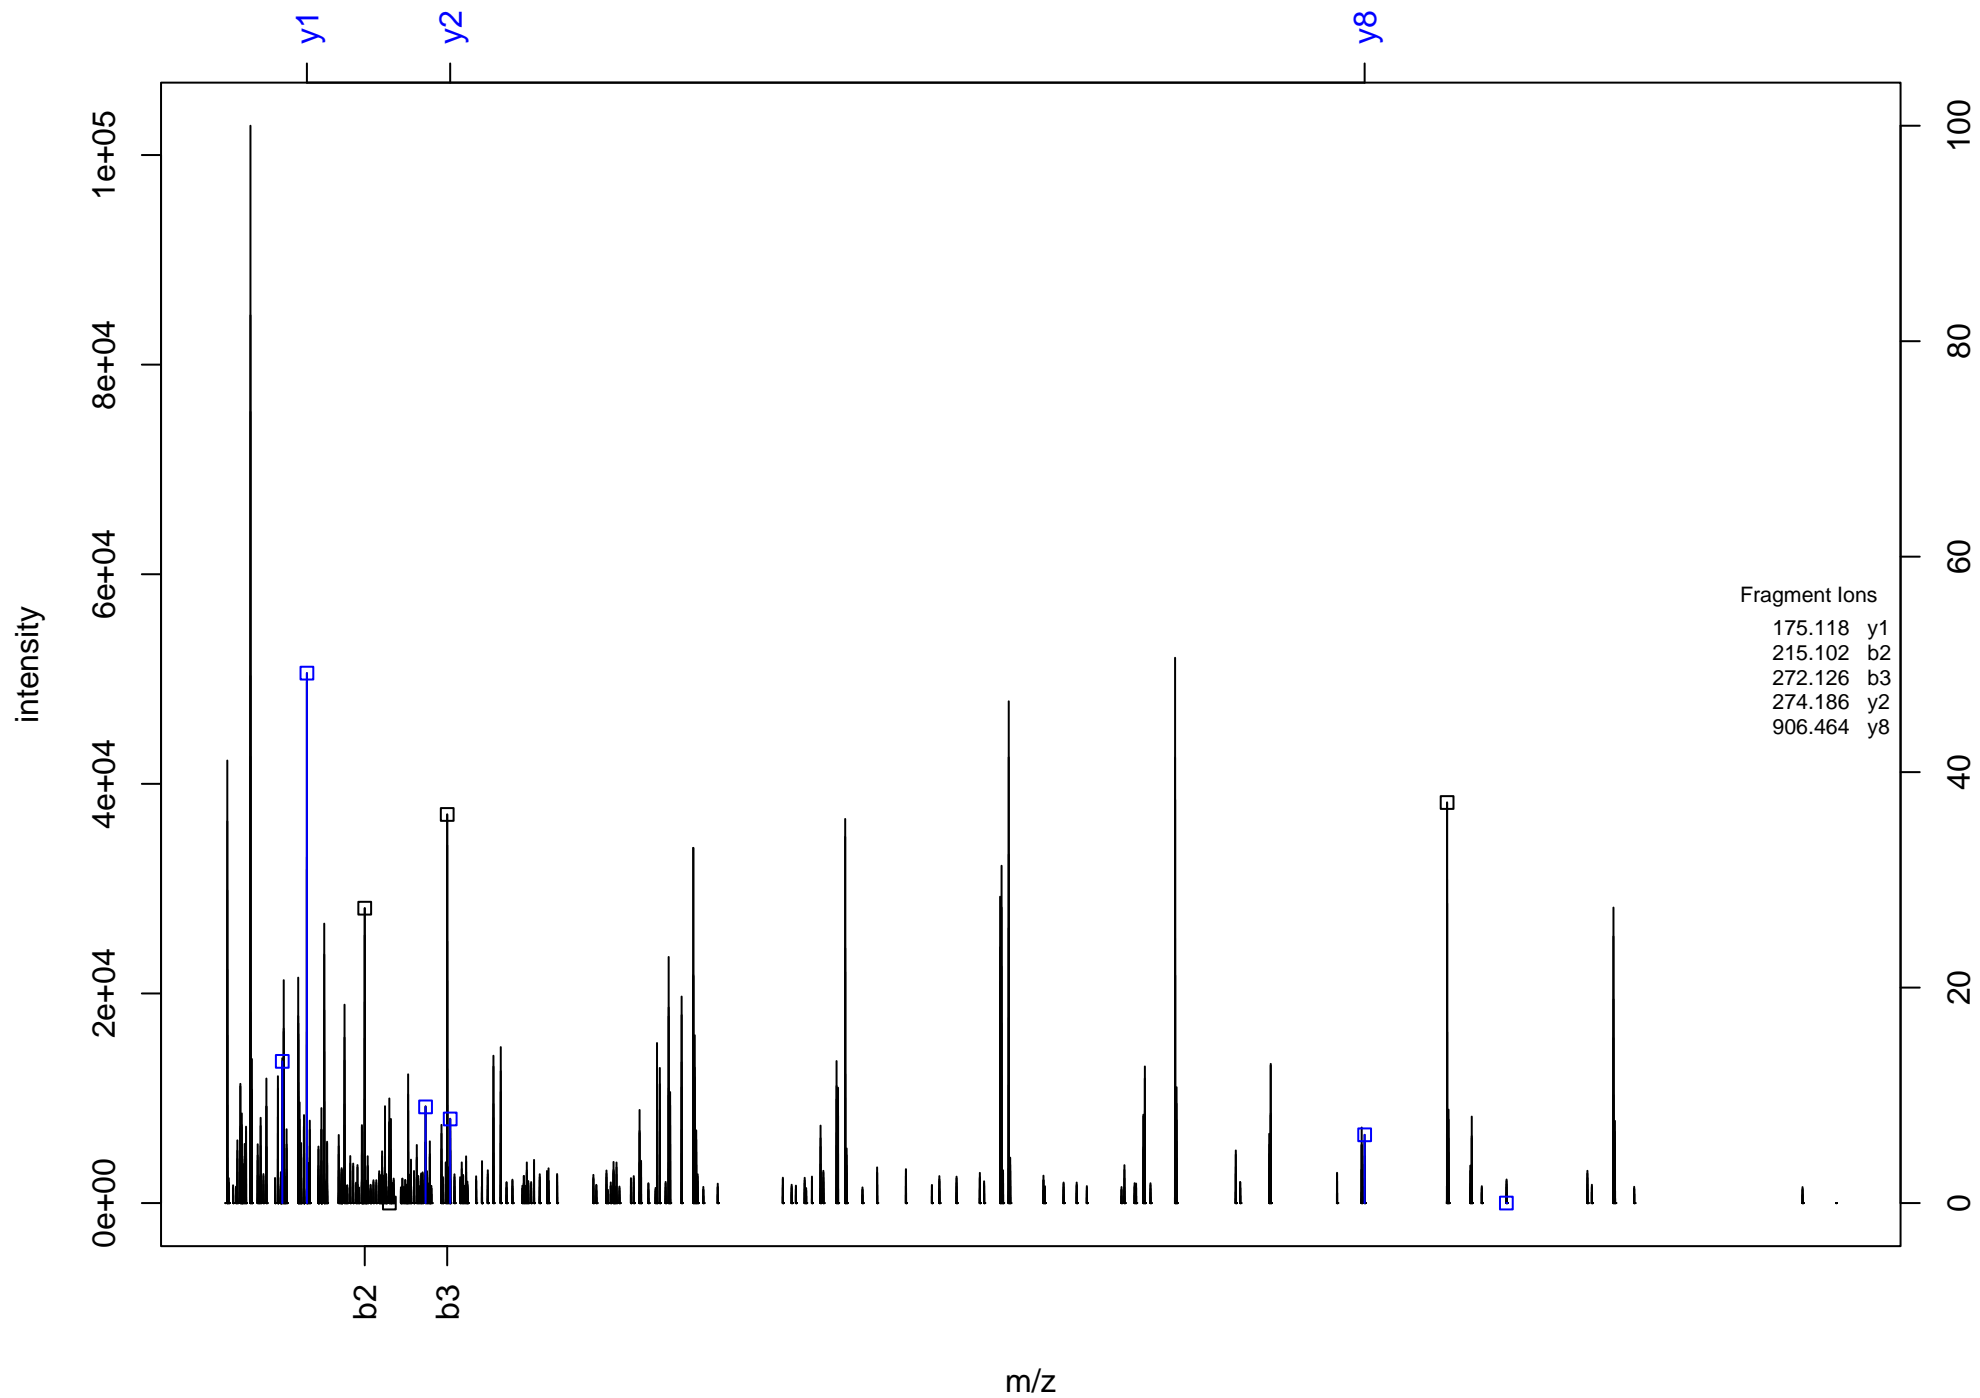

Fragment Ions  
175.118 y1  
215.102 b2  
272.126 b3  
274.186 y2  
906.464 y8

# GEGAGQPSTSAQGQPAAPVPQK

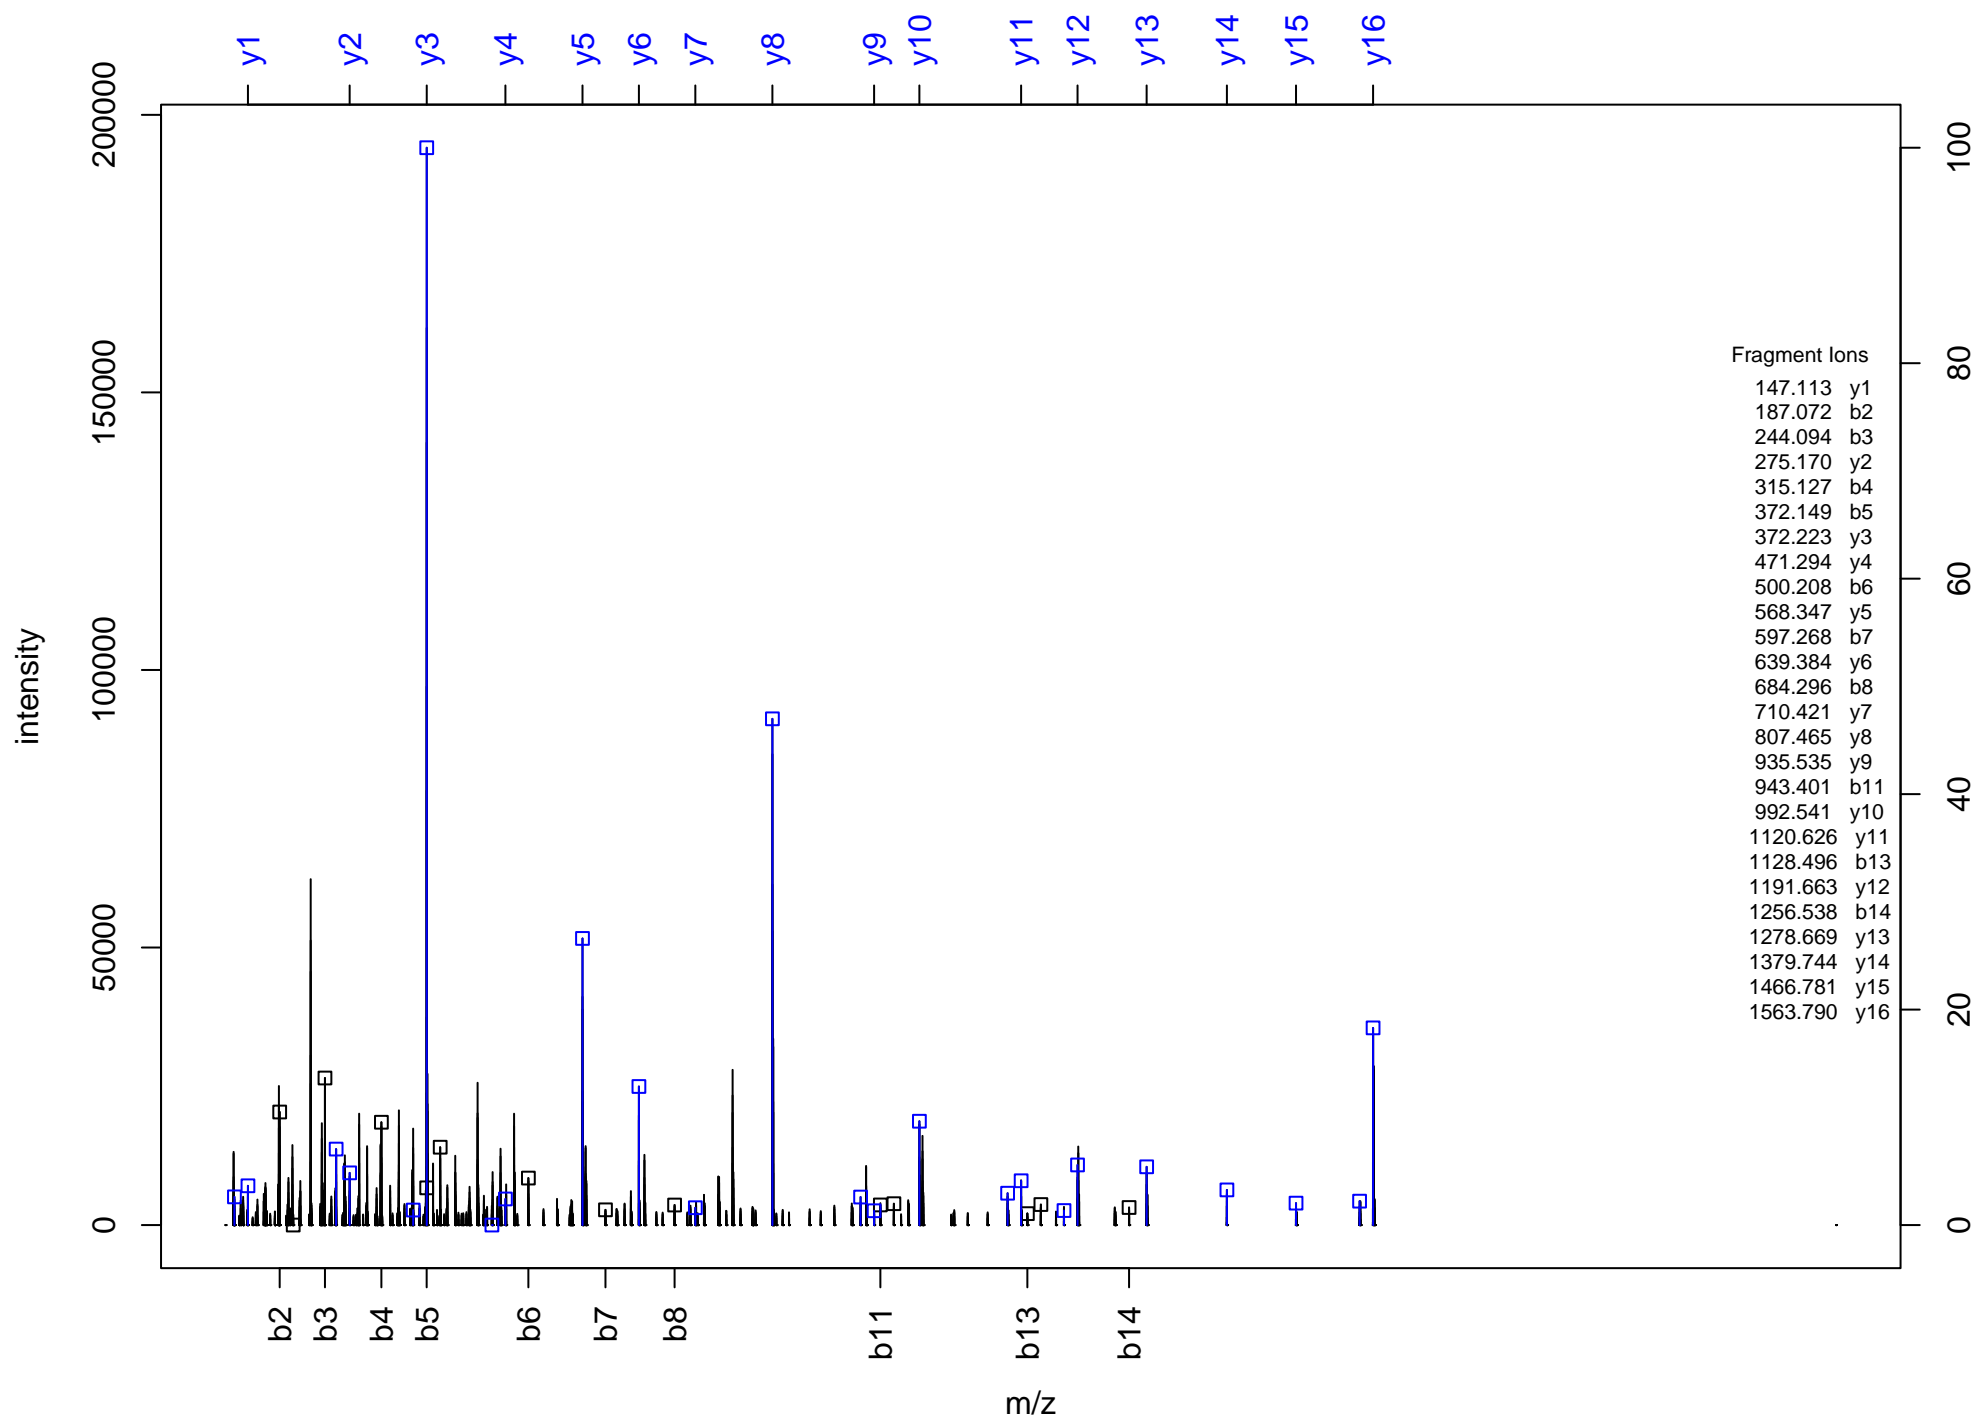

# QAGGGAGPPNPSLN^GSAPR

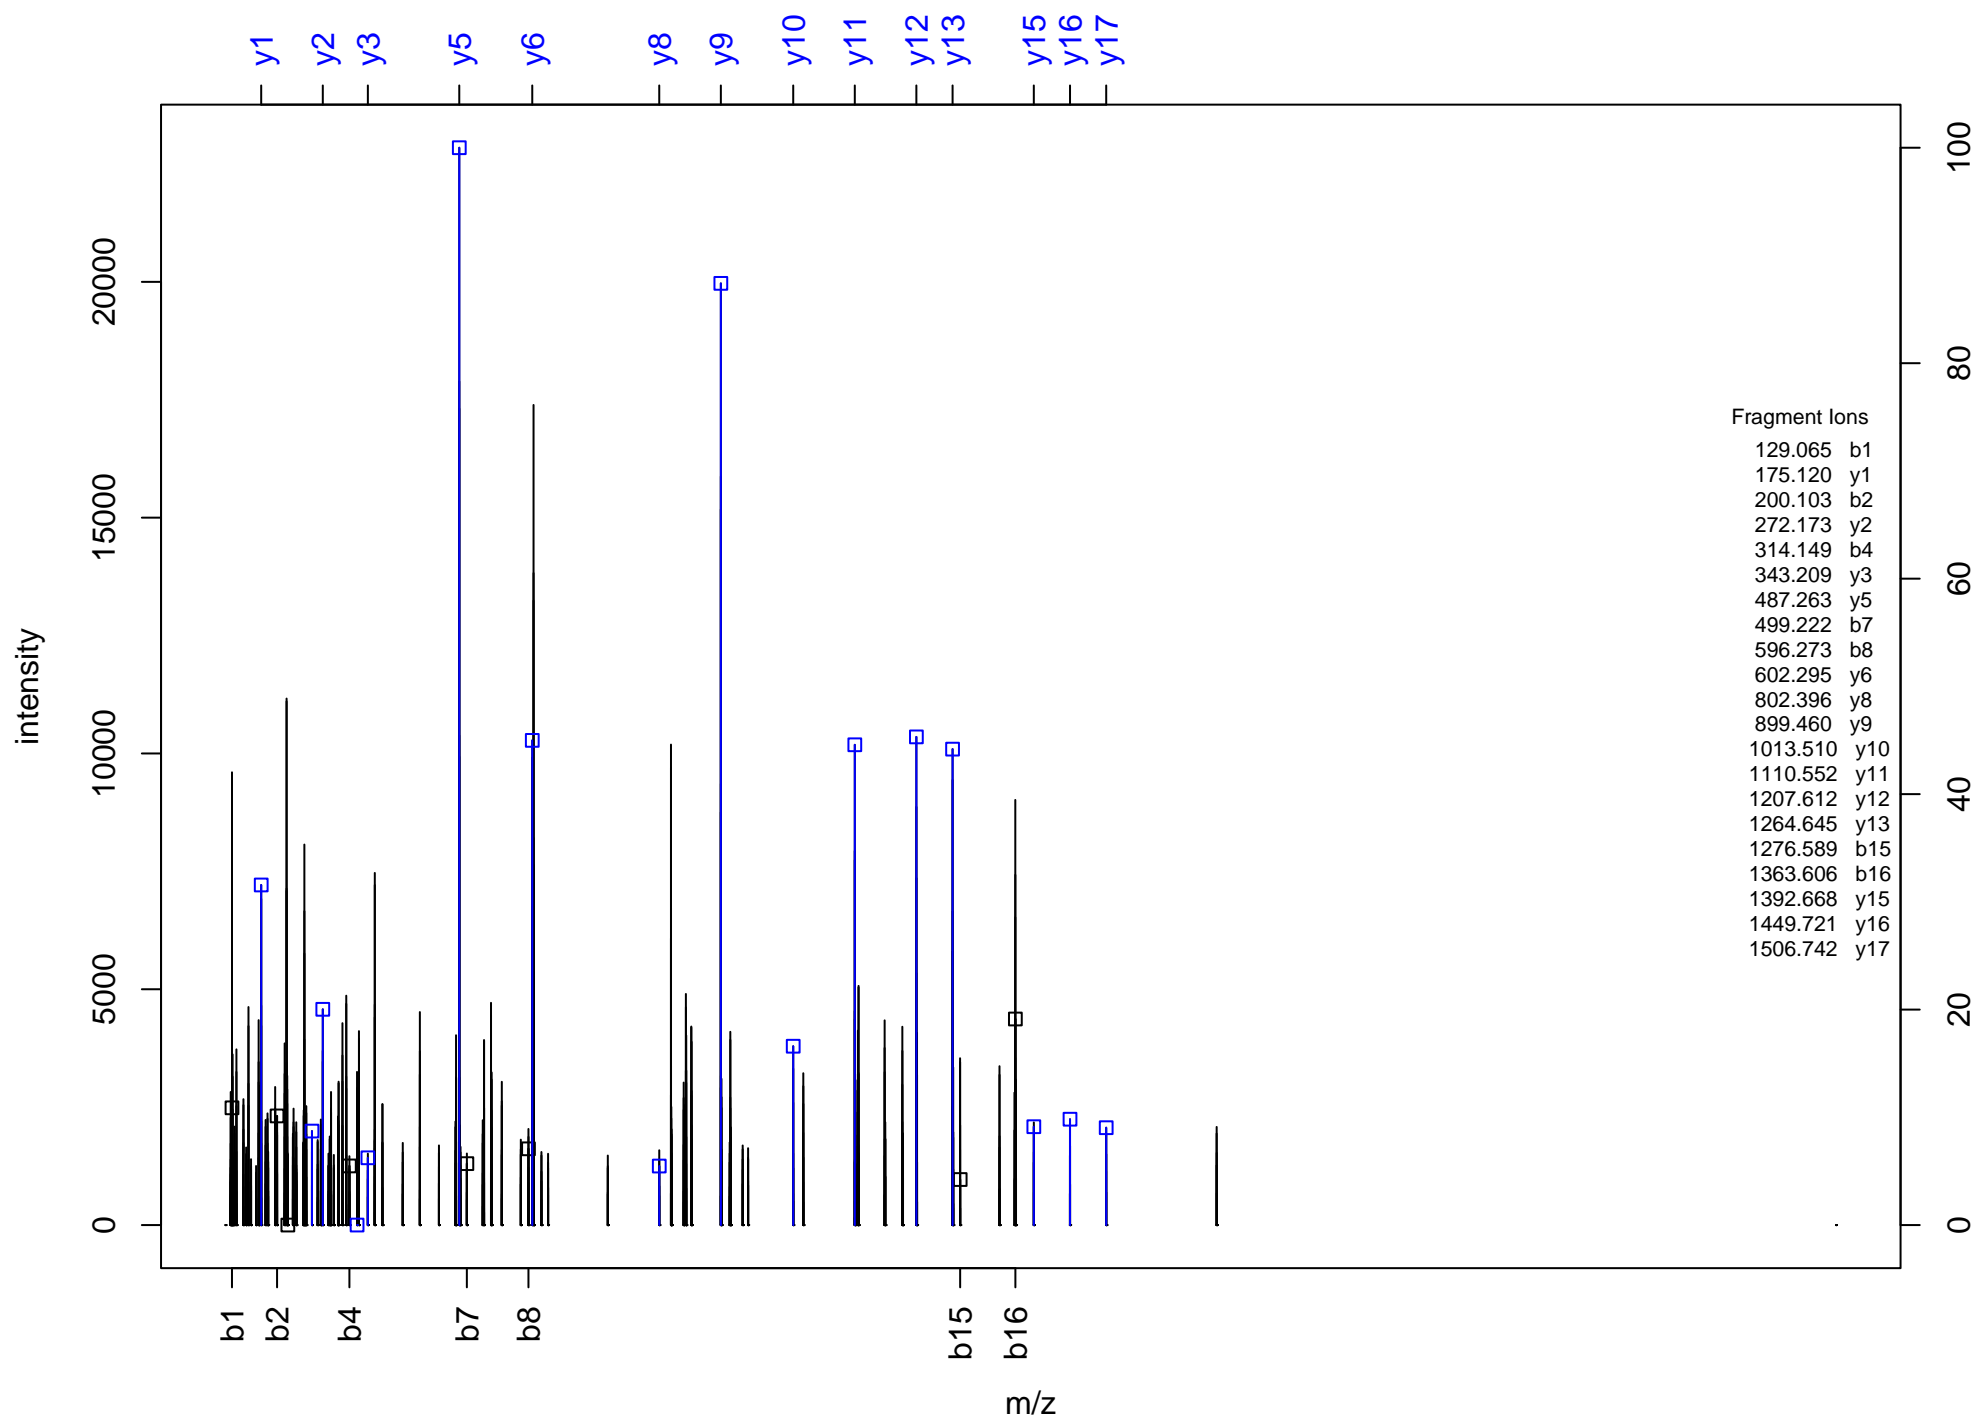

# IYSDSEFSSPDVQGPIINFNLDDGGK

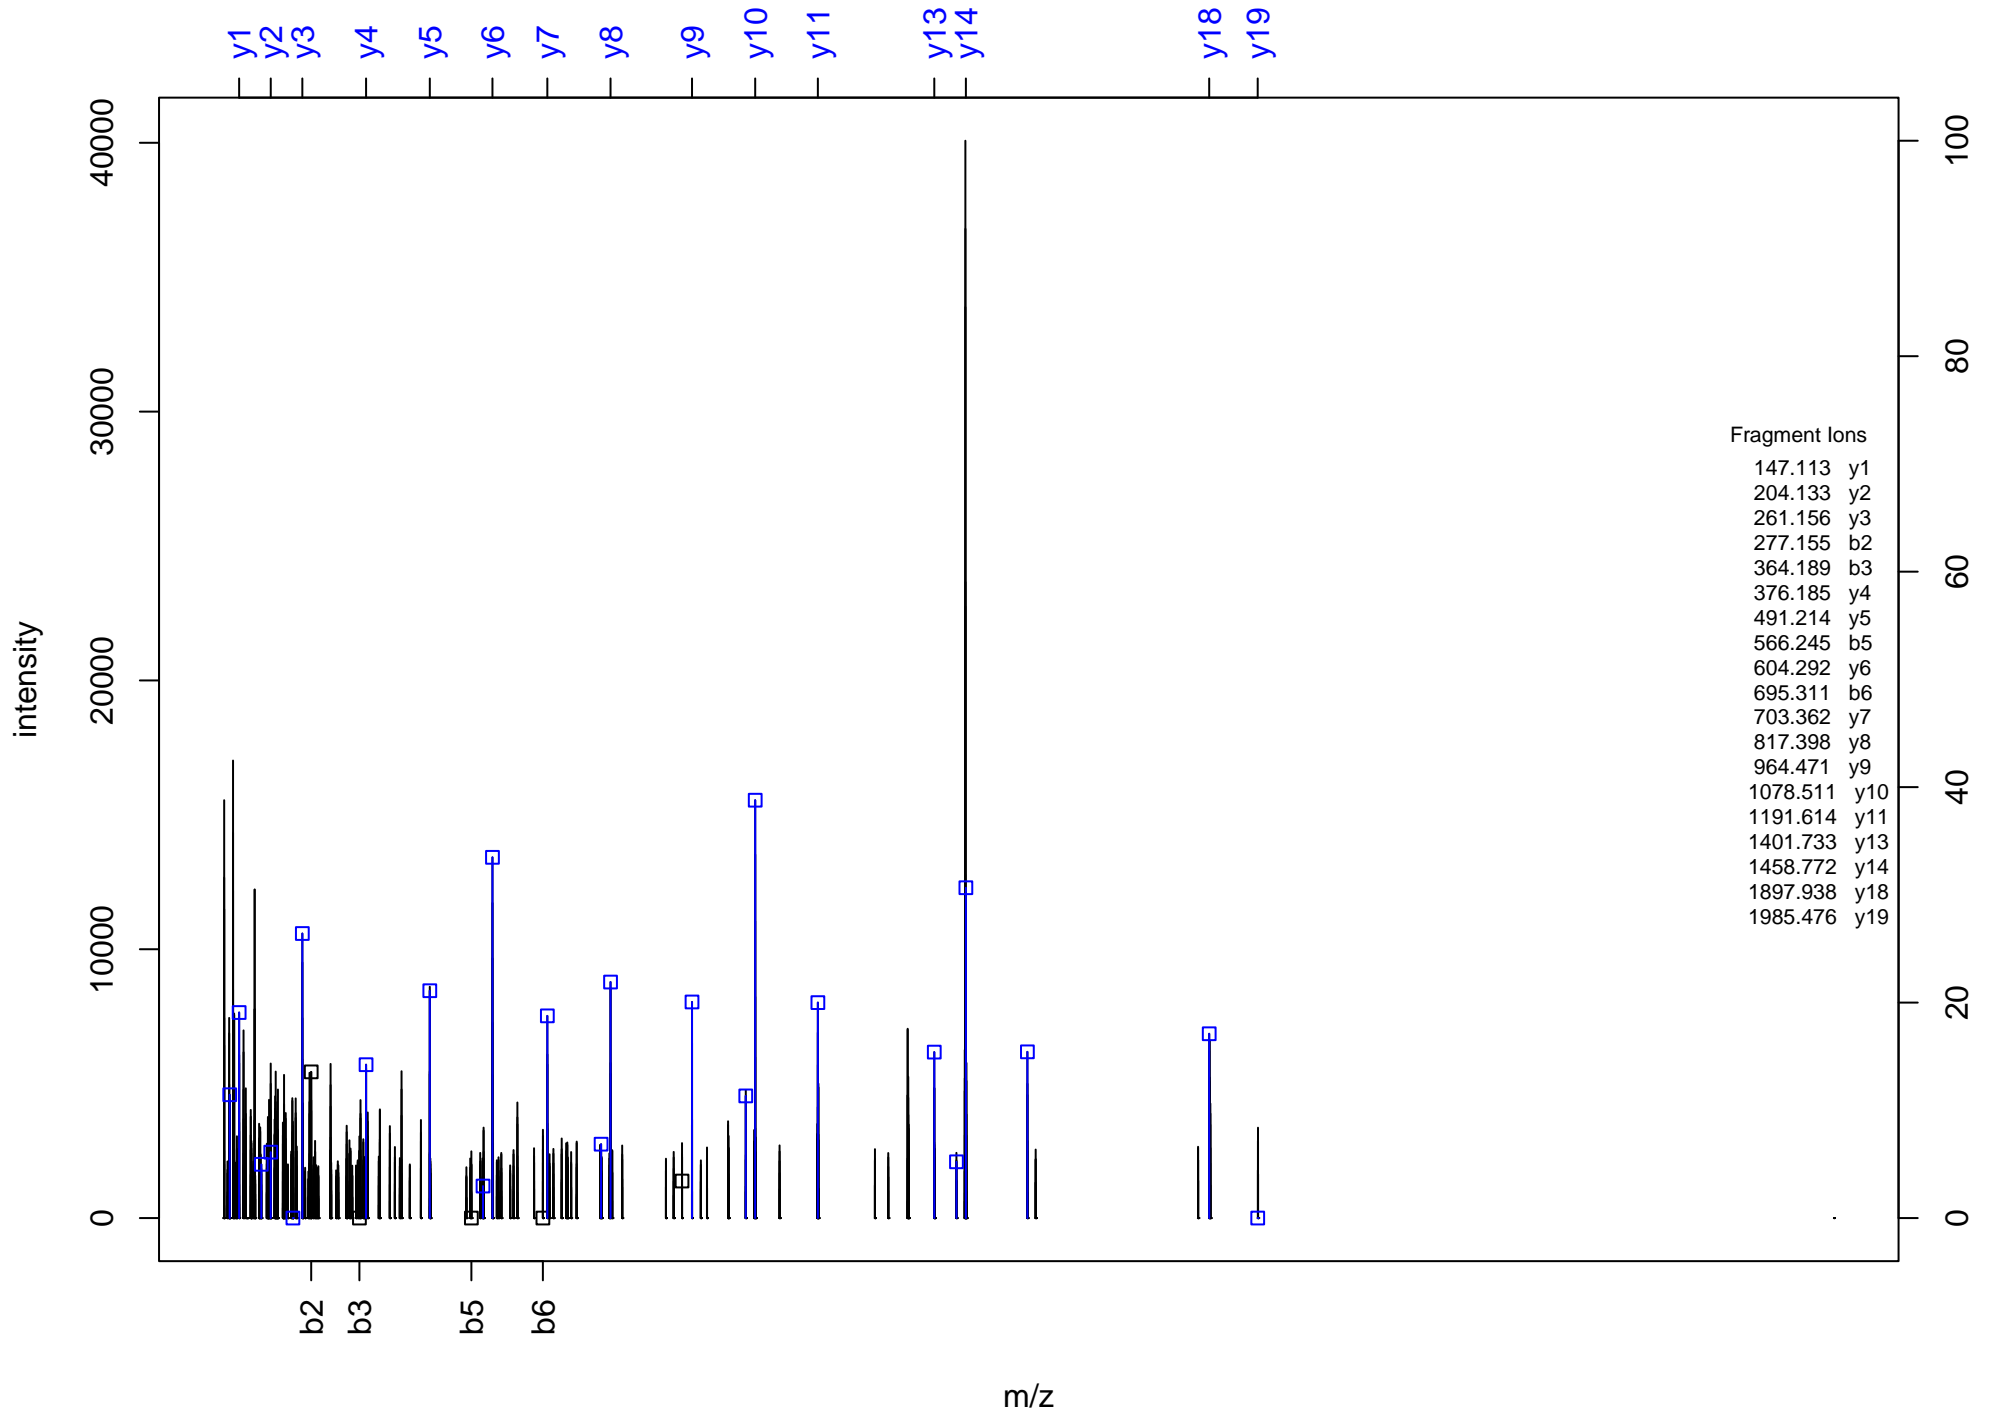

# LYISQTIR

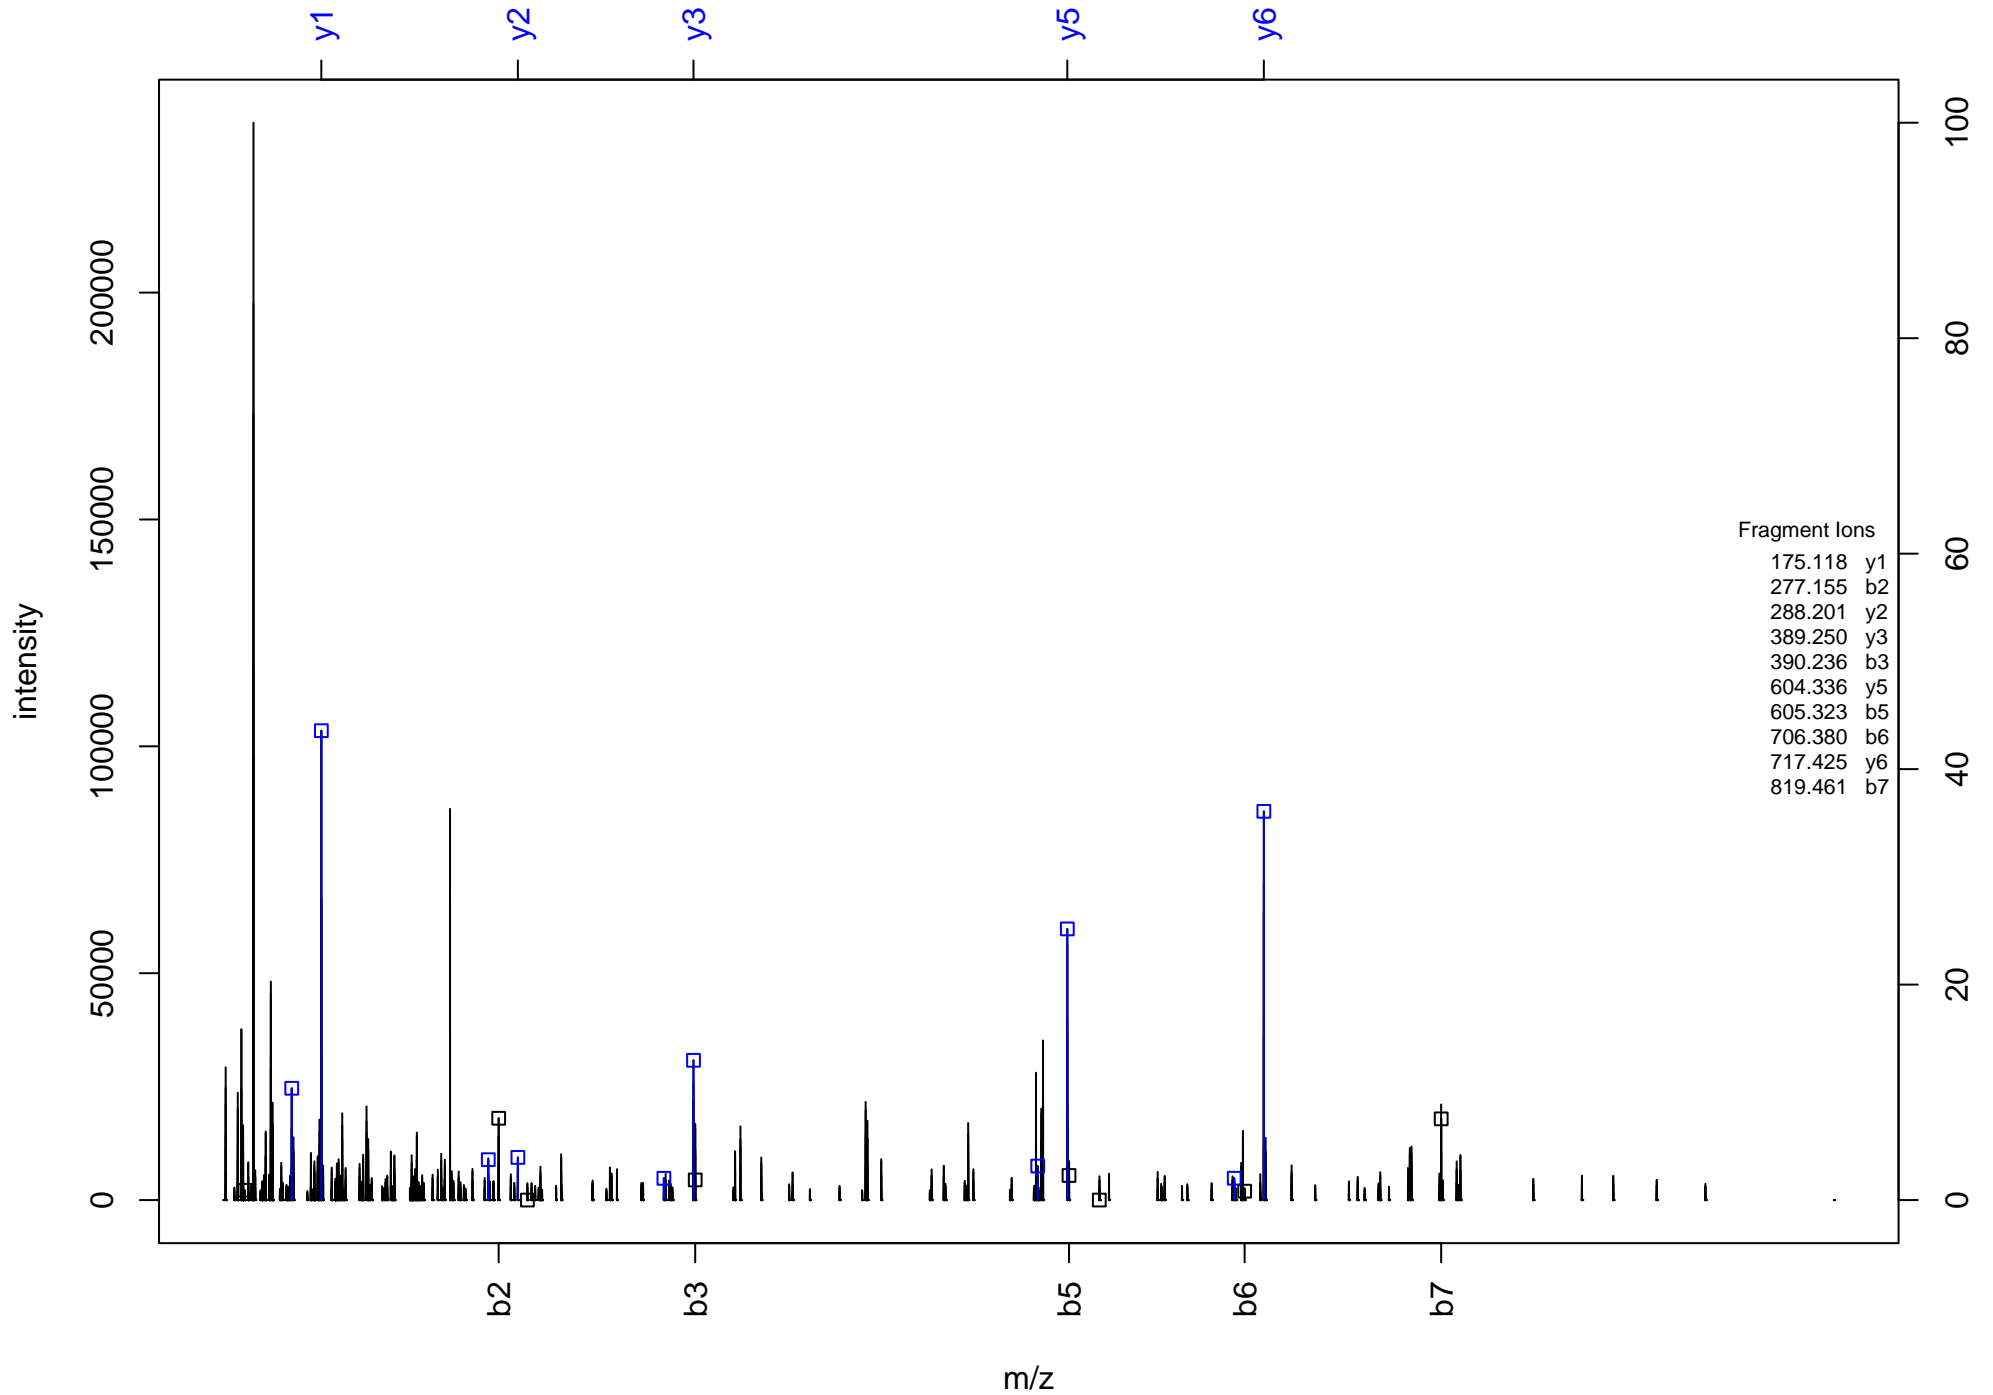

# TGASFQQAQEEFSQGIFSSR

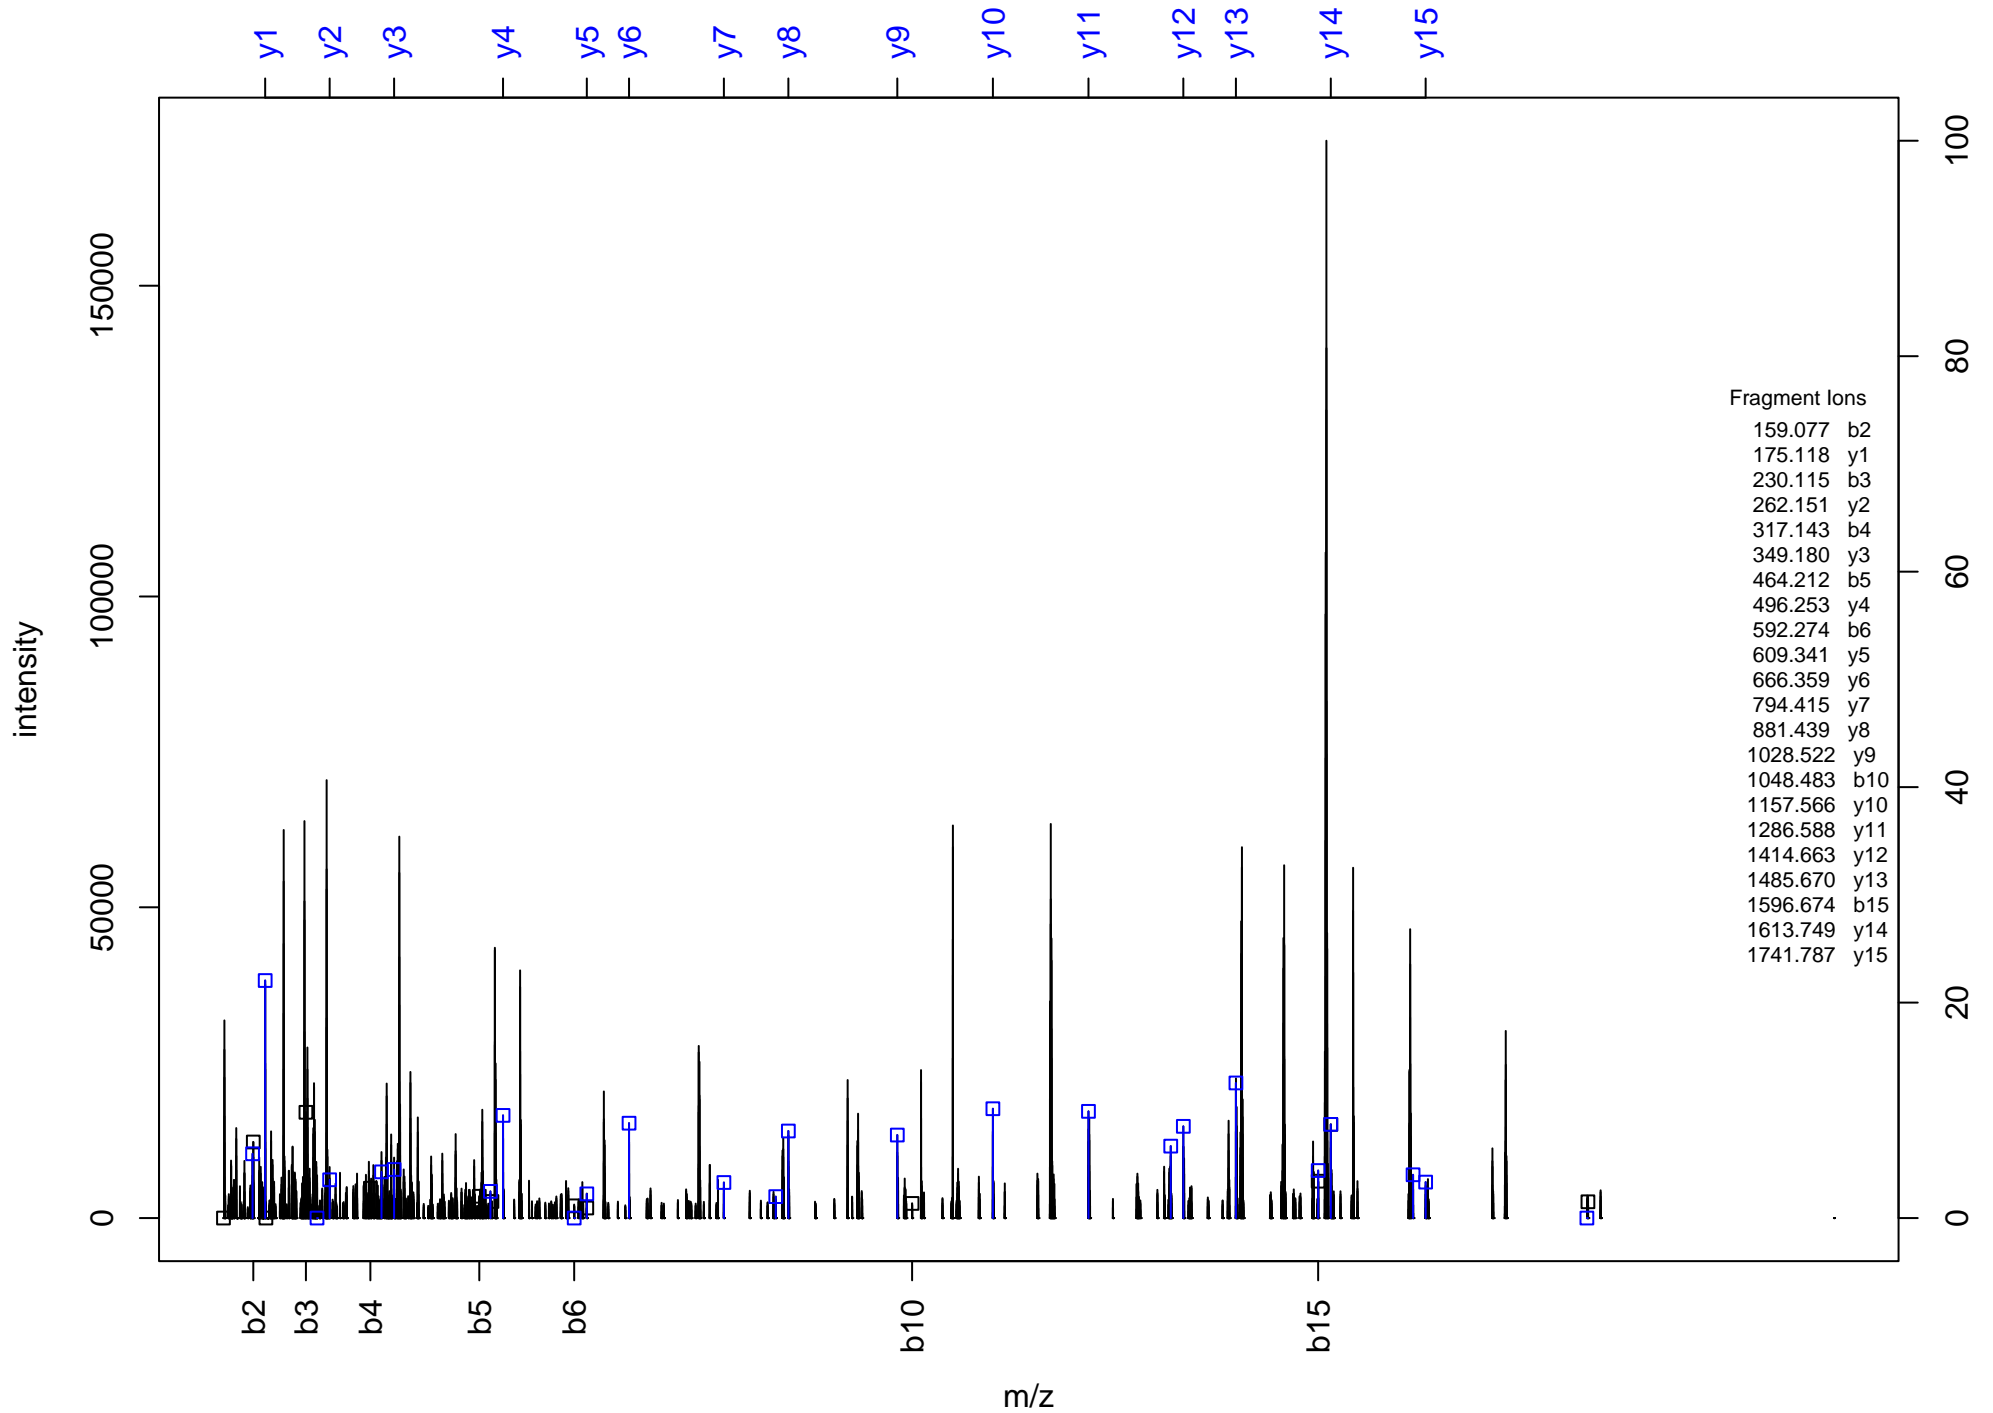

# DIAVTNMRR

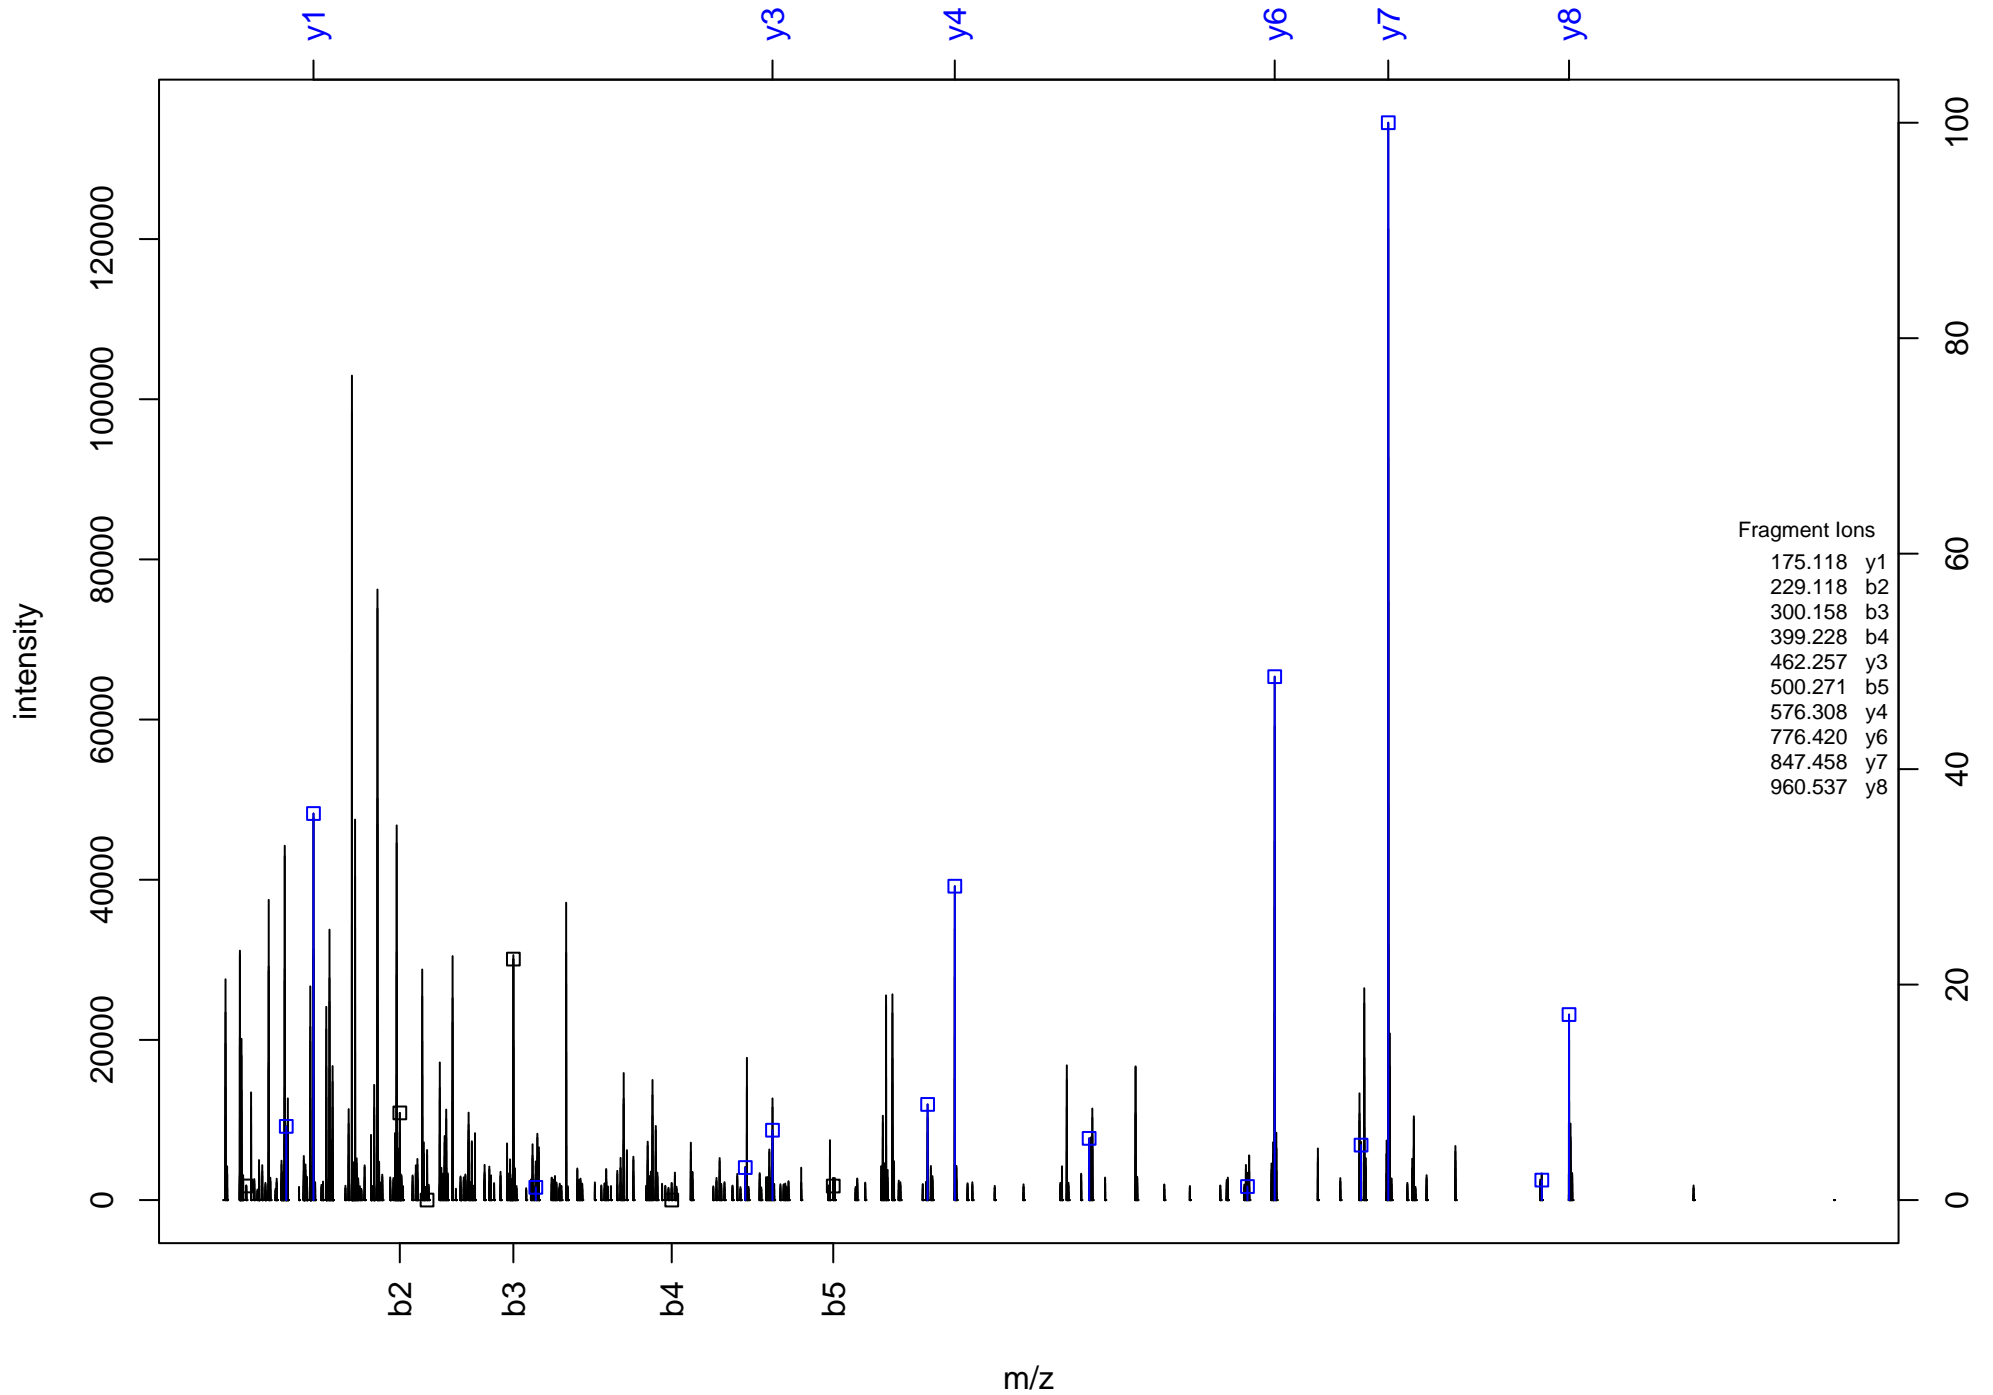

# APTSTDTPPIYSQVAPR

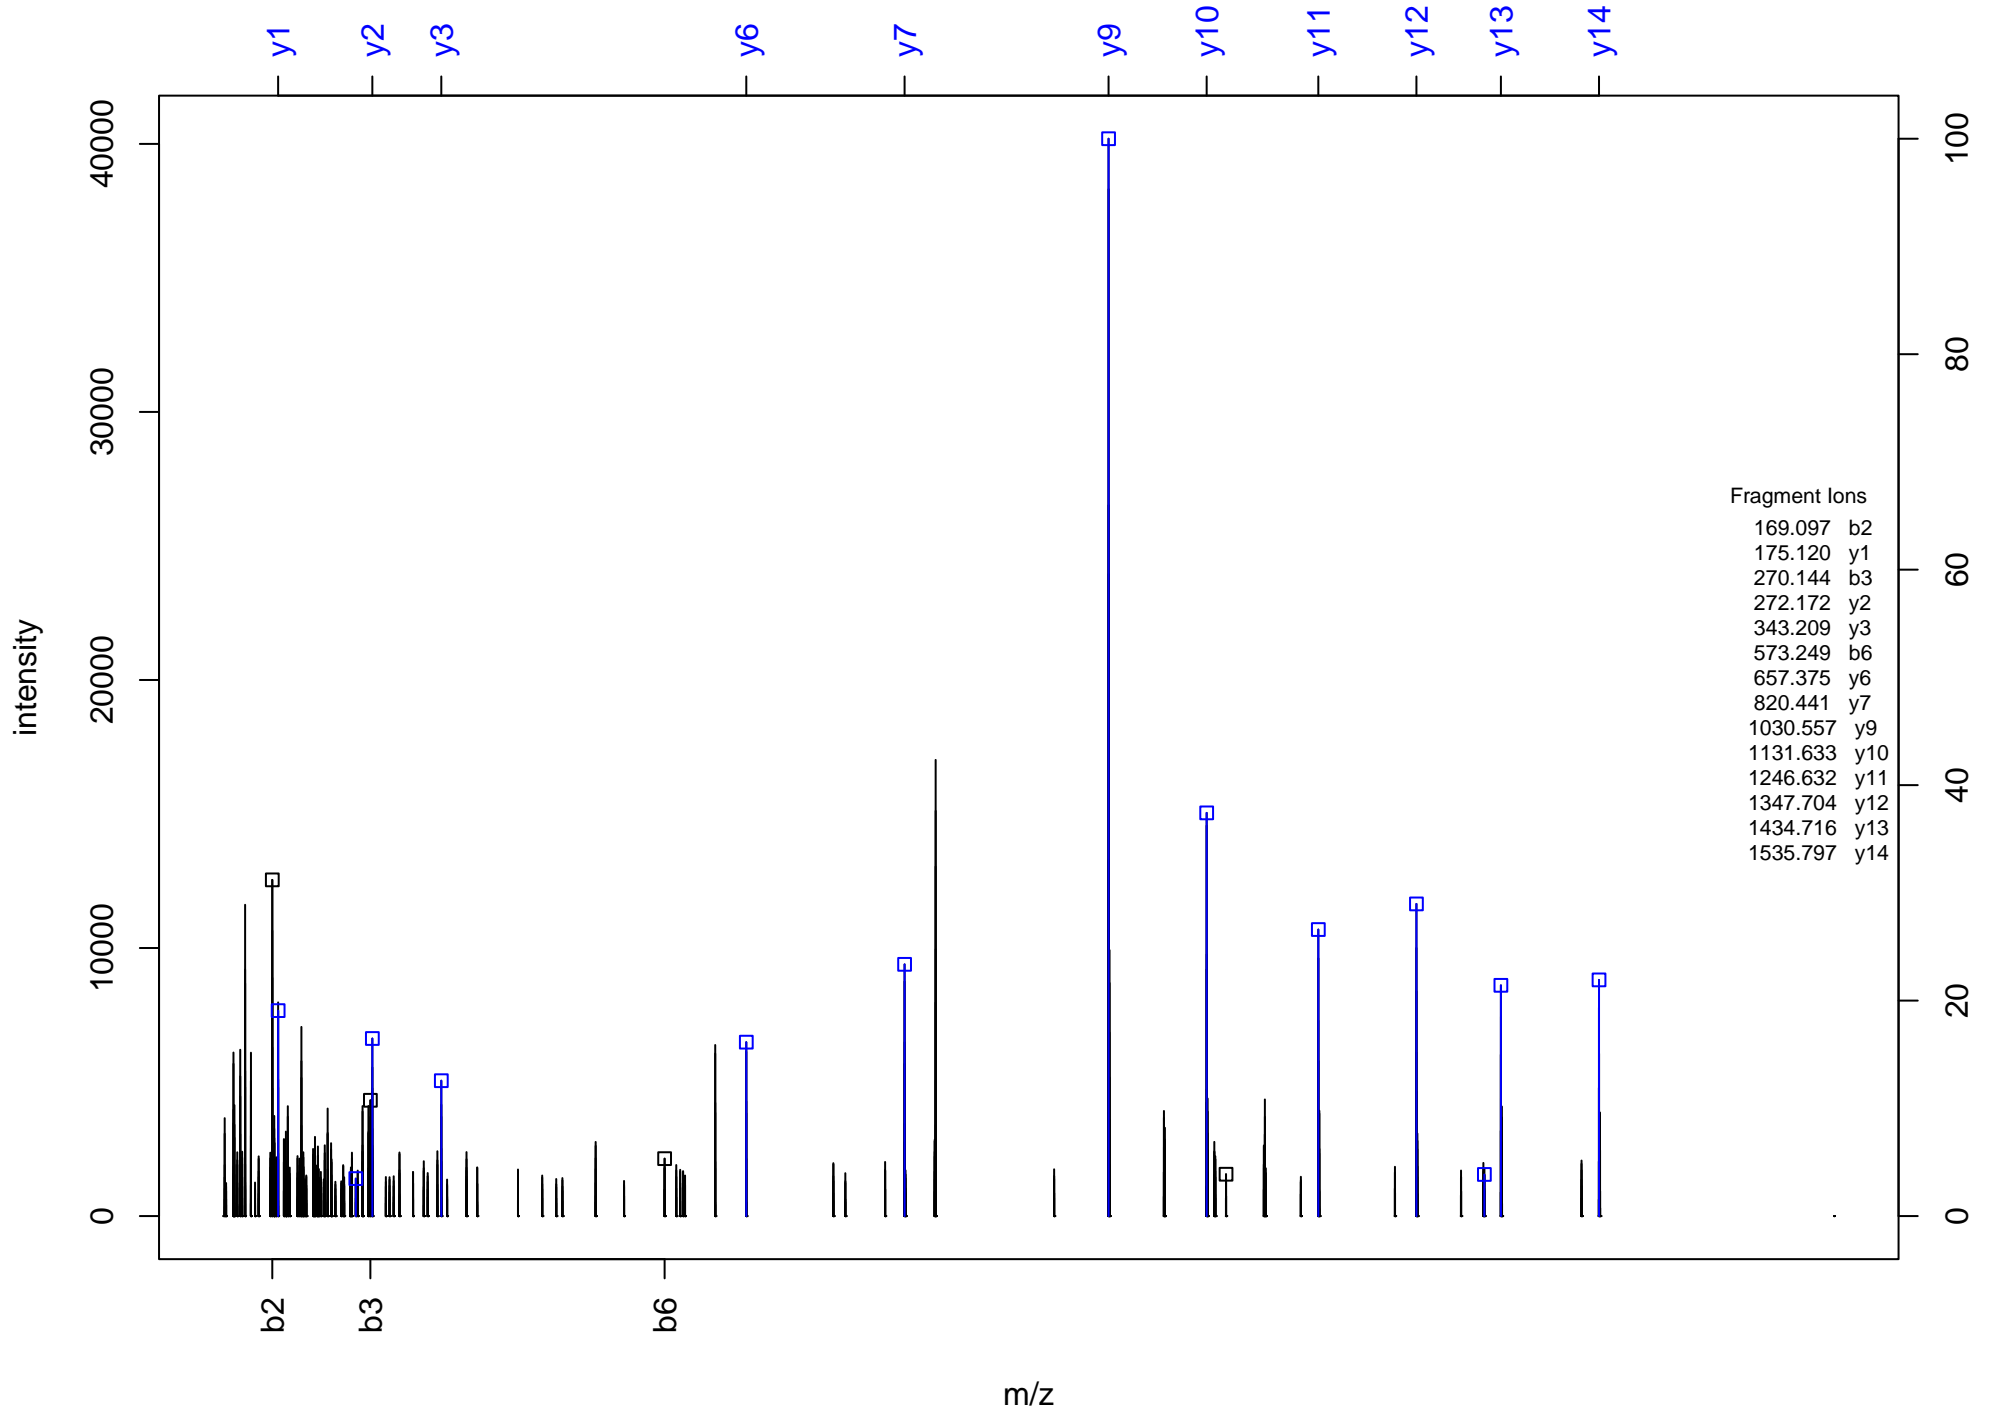



# LKLTN^NLMDDN^GHIILN^SMHRYQ^PR

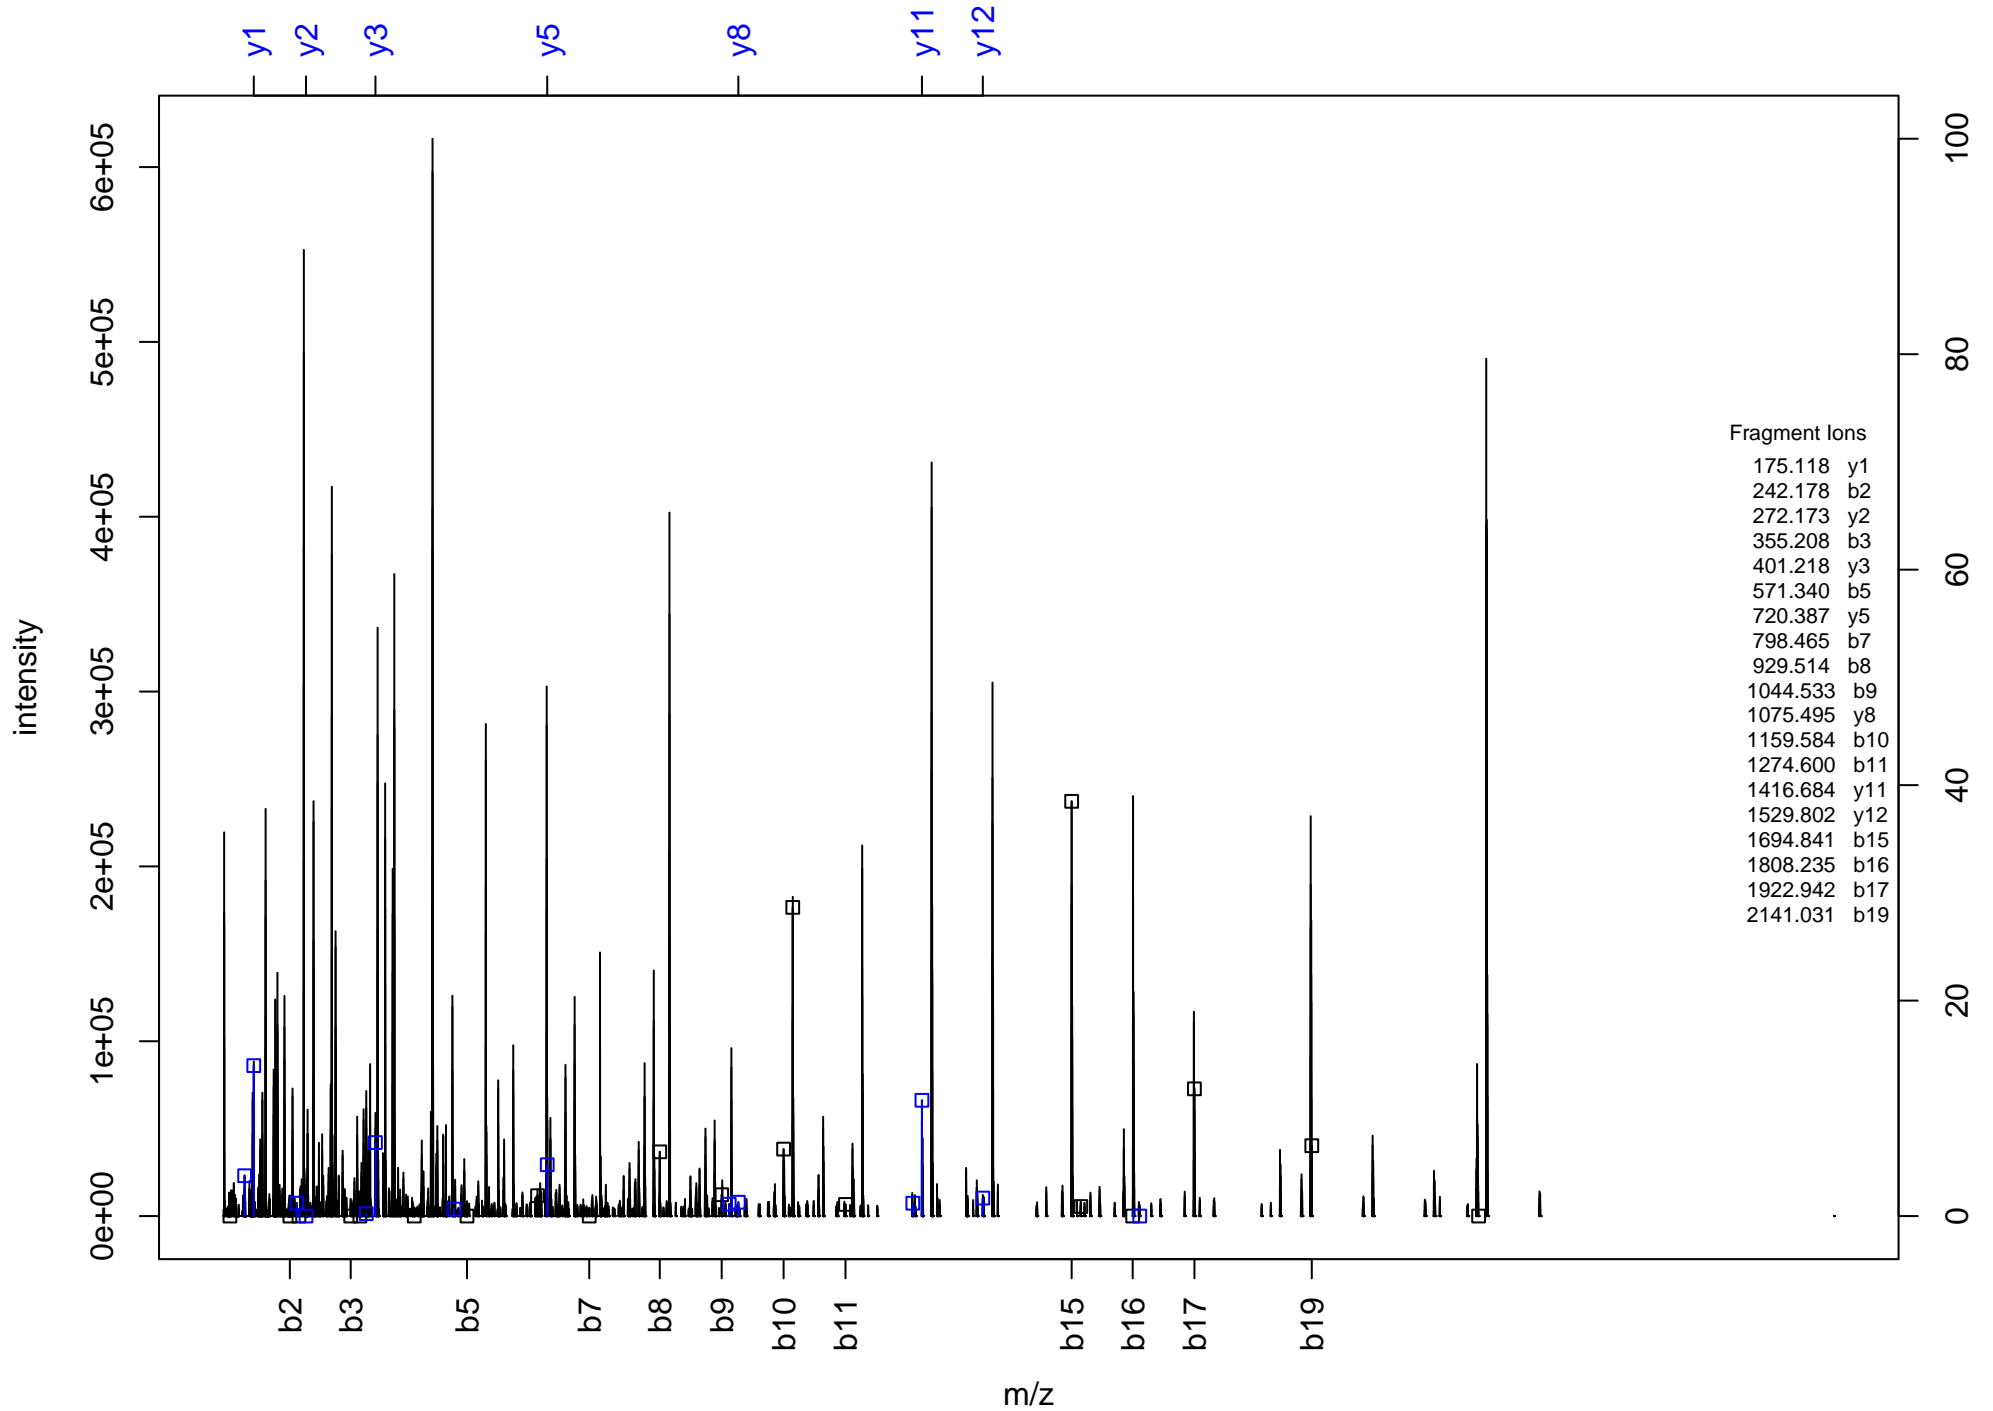

# LTLPDGLTSAASPEEGLSAELLEAQTEEPADTASLDCR

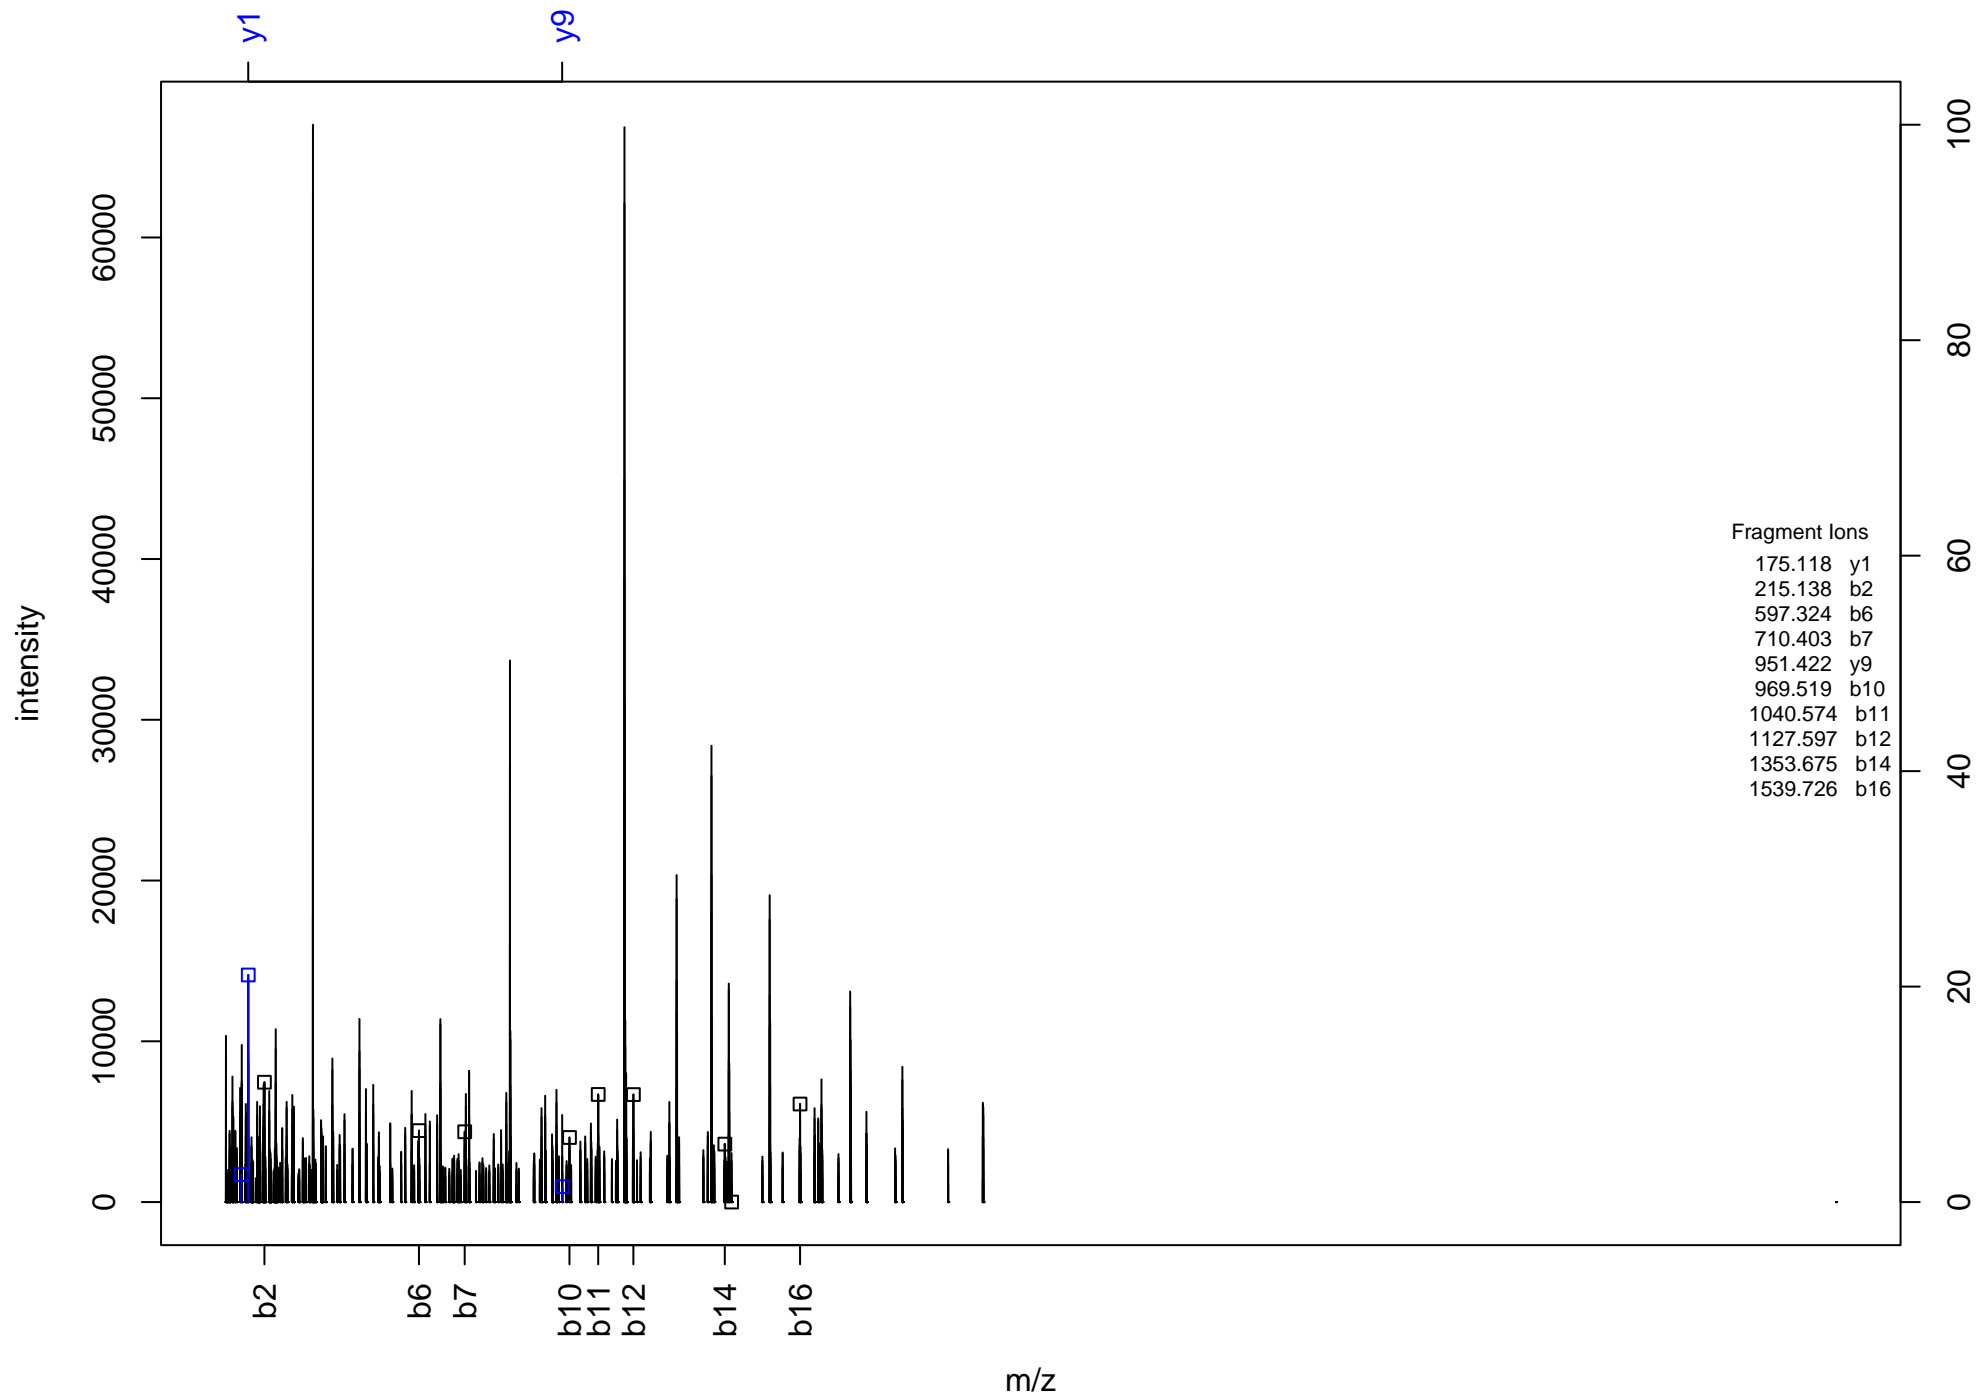

# ACSPGASEITGLSK

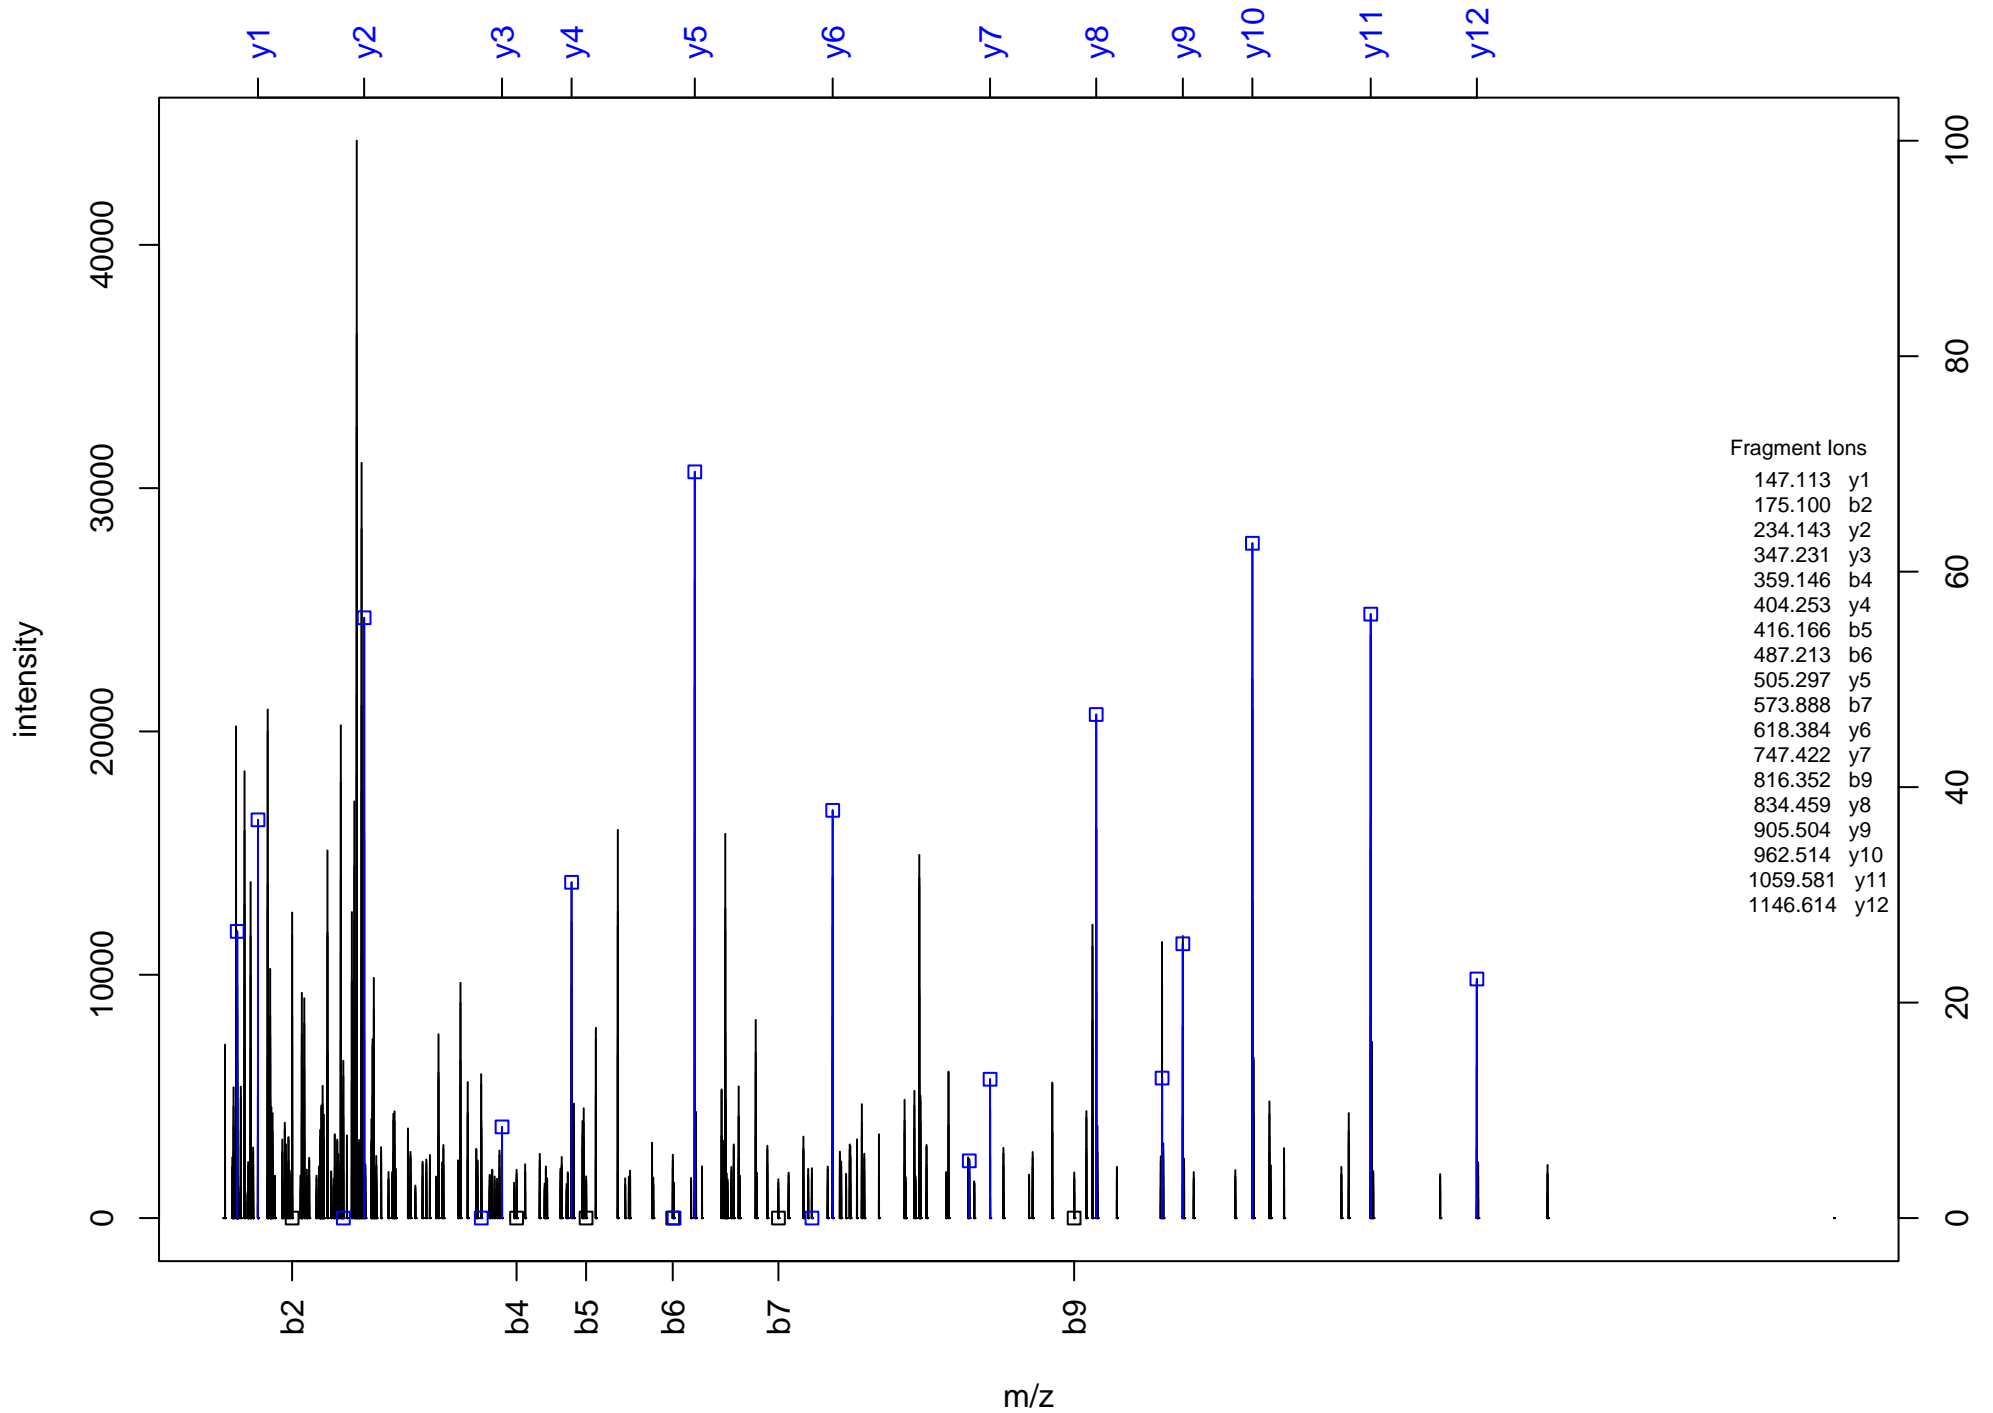

# (Ac)AESDWDTVTVLR

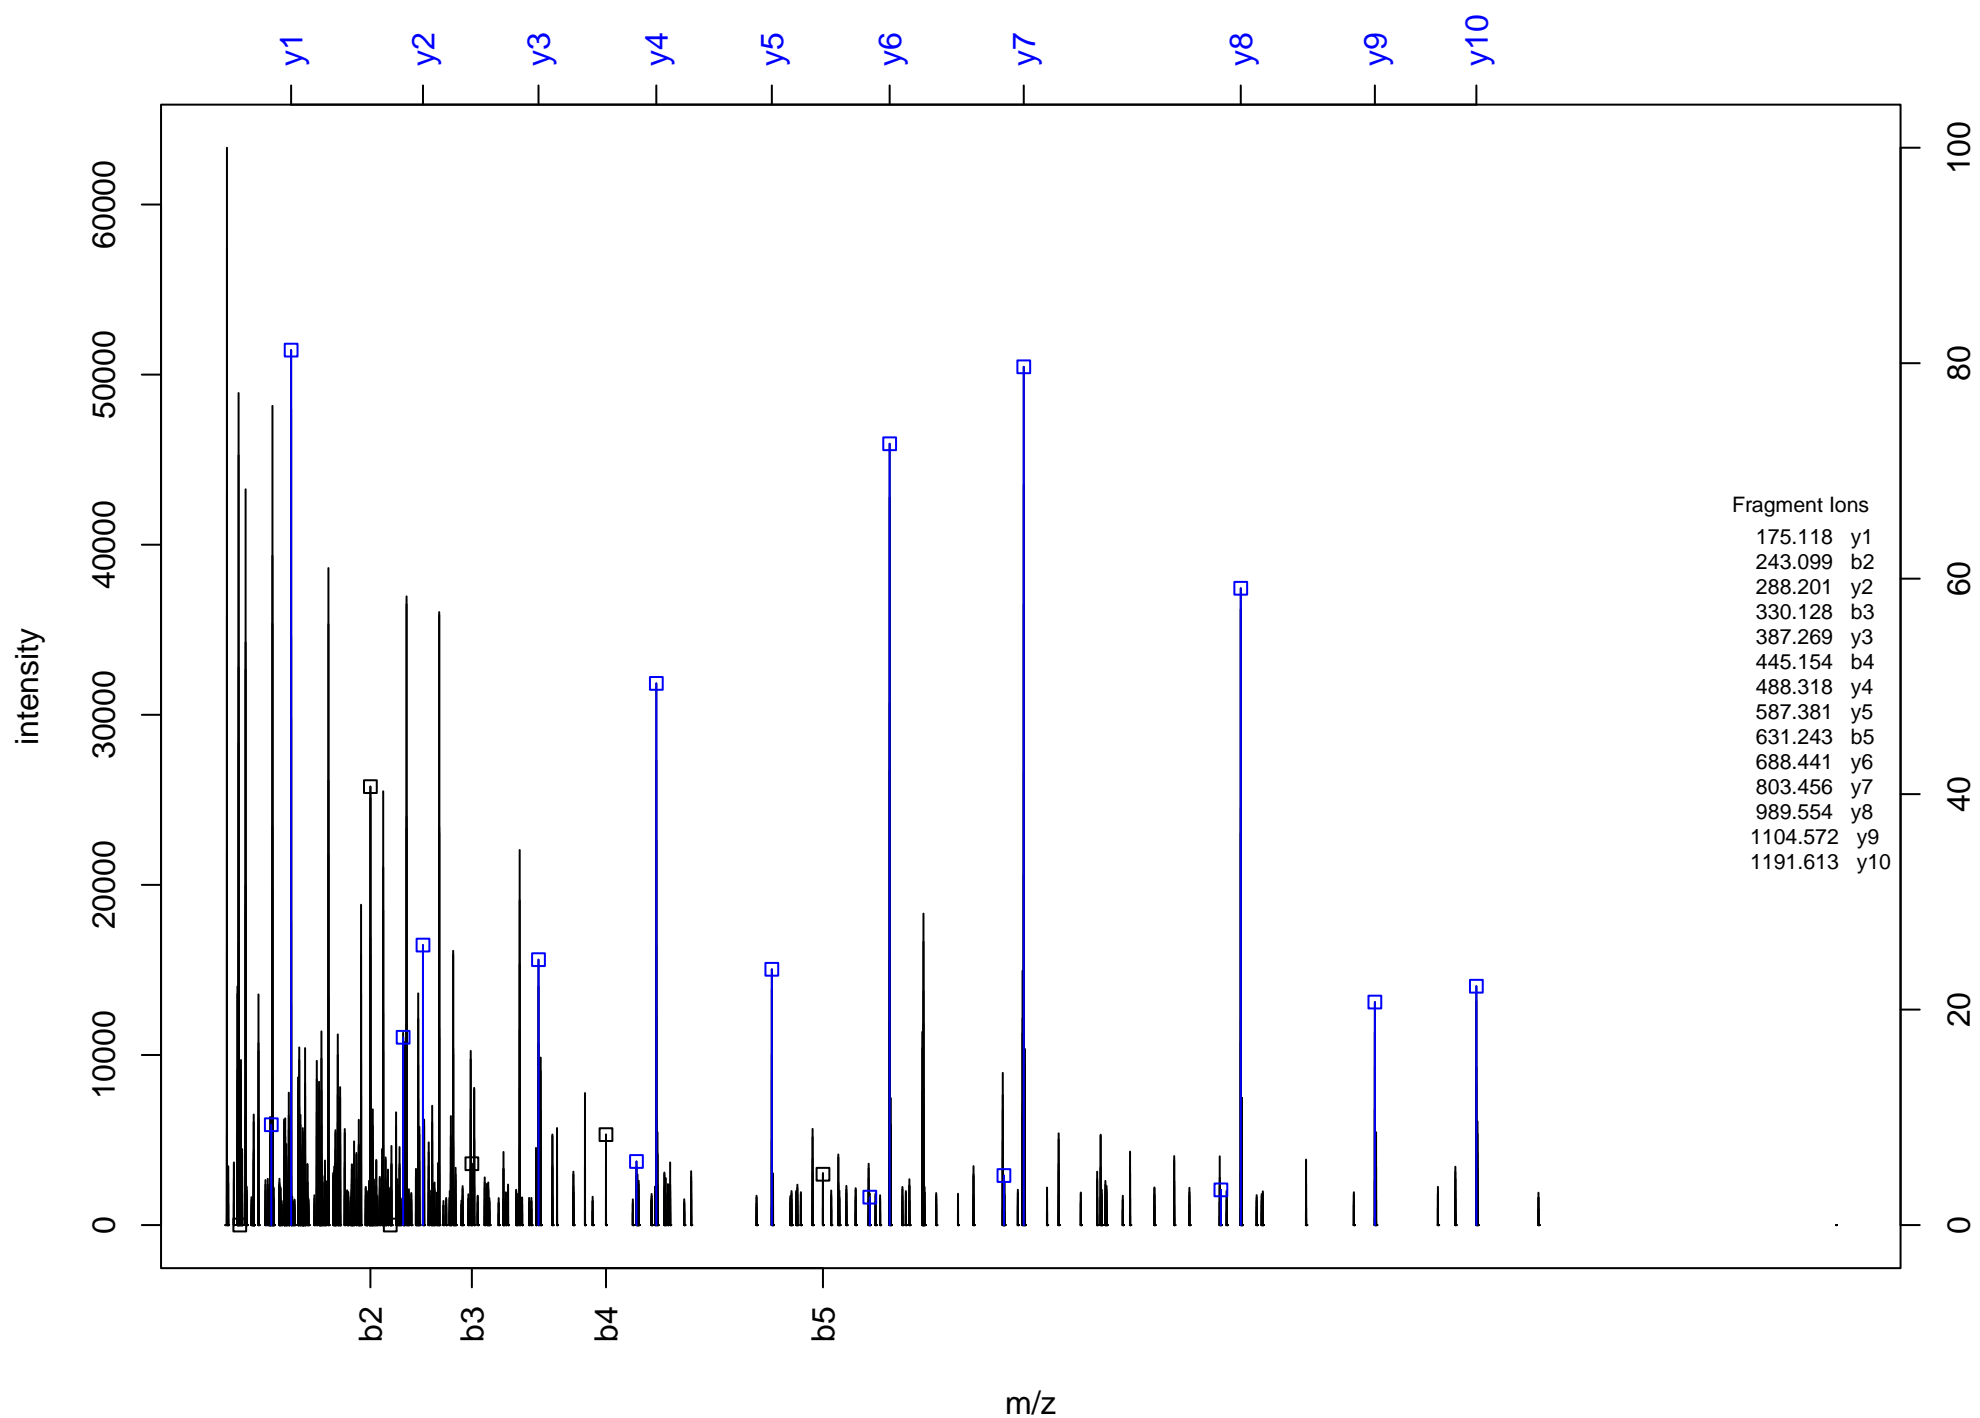

# ADGAGDEAAERTEEPESPESVDQTSPTPGDGNPR

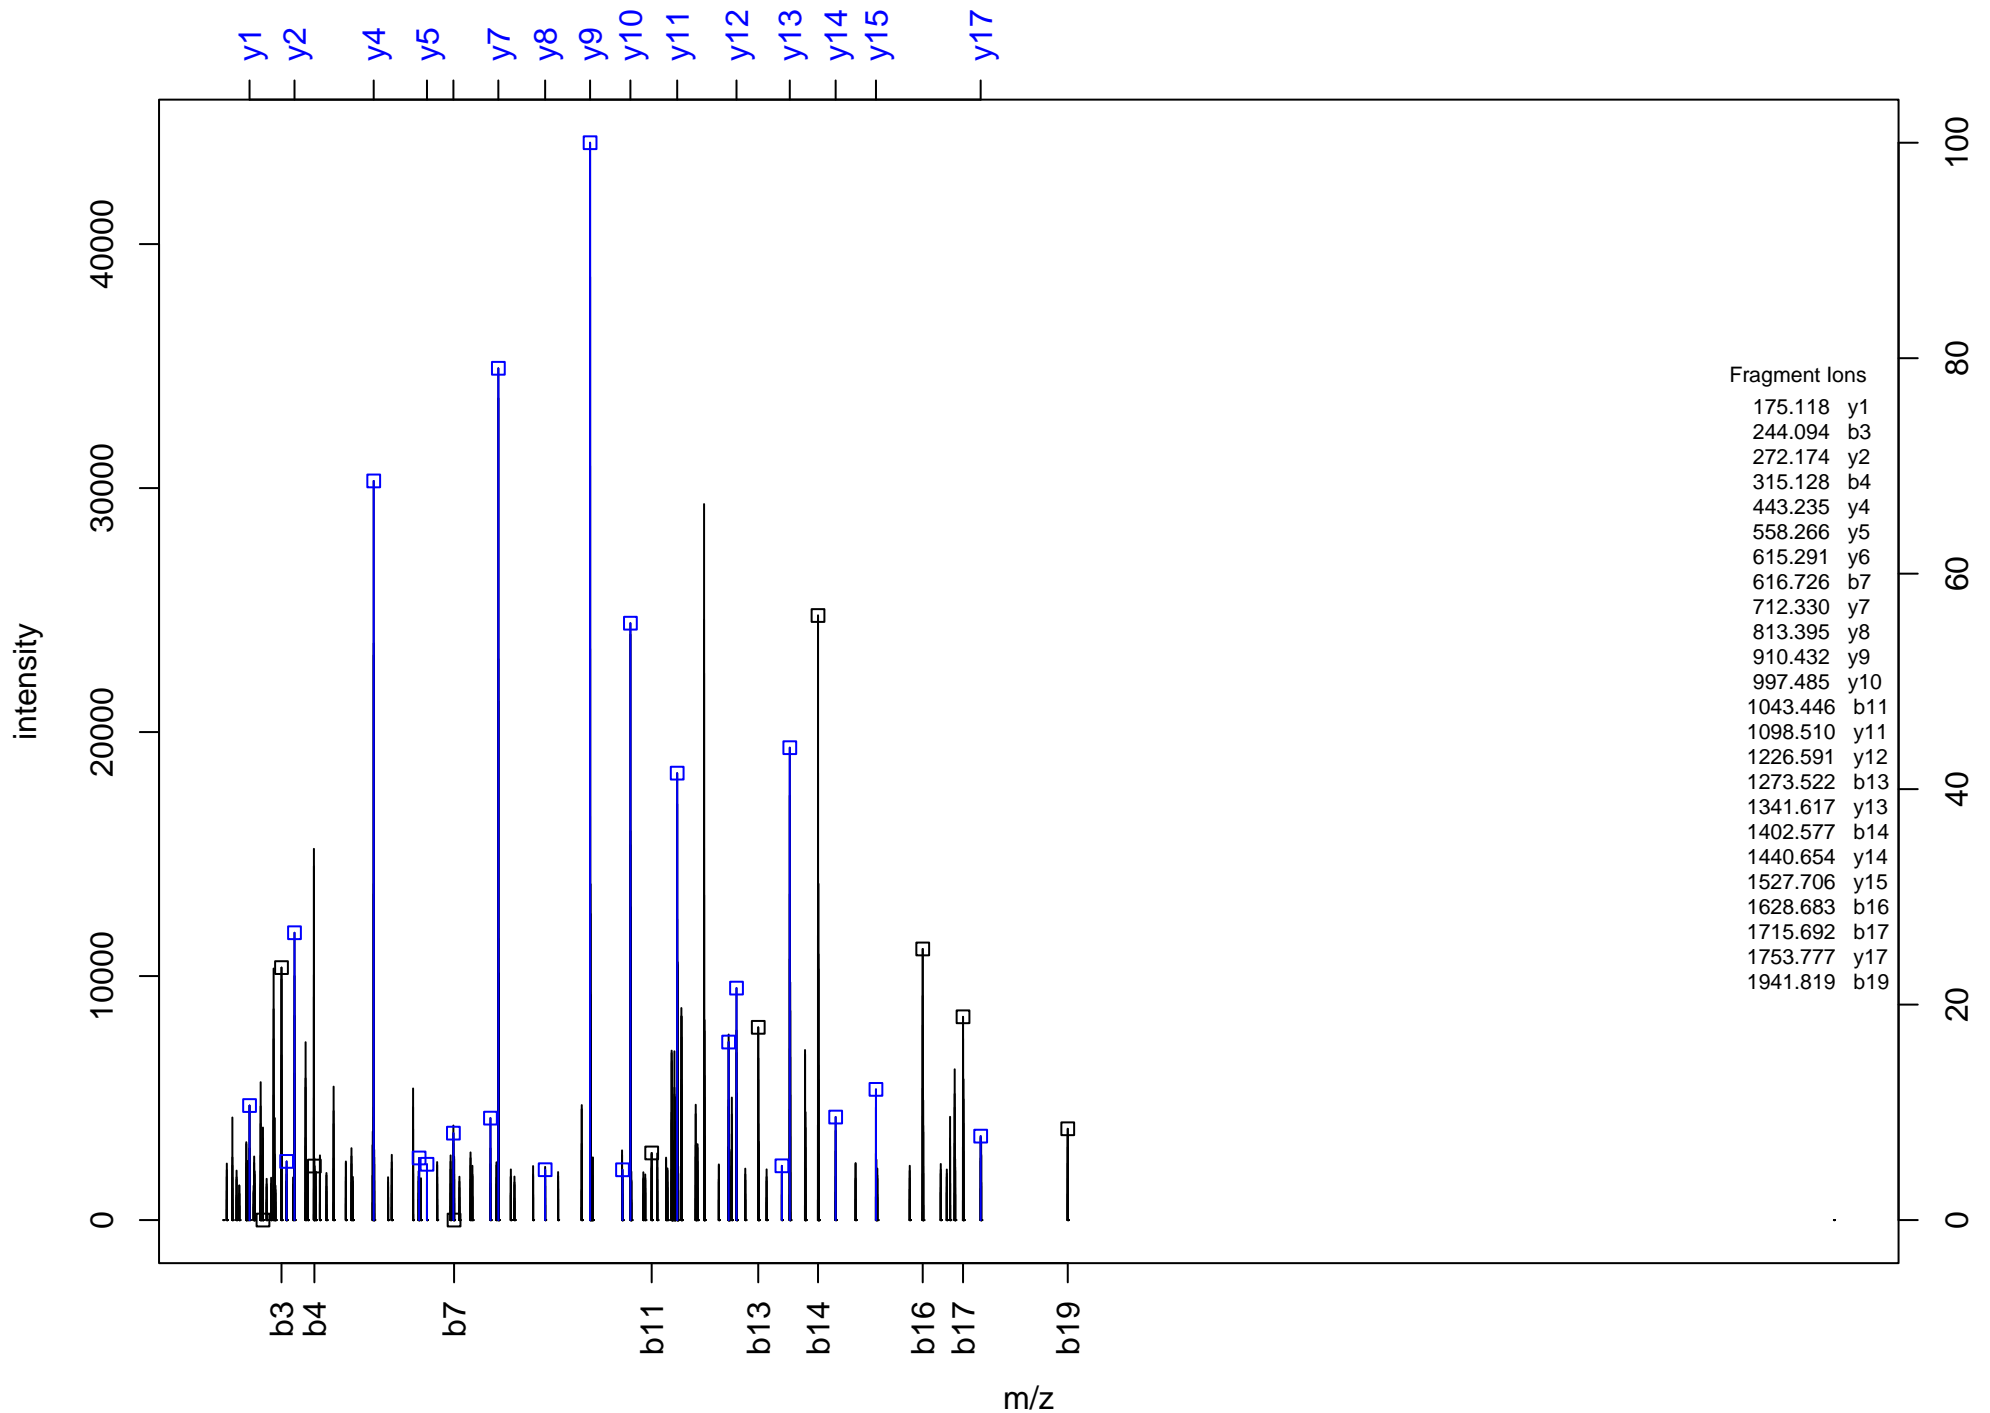

# VDDDFTAQDYR

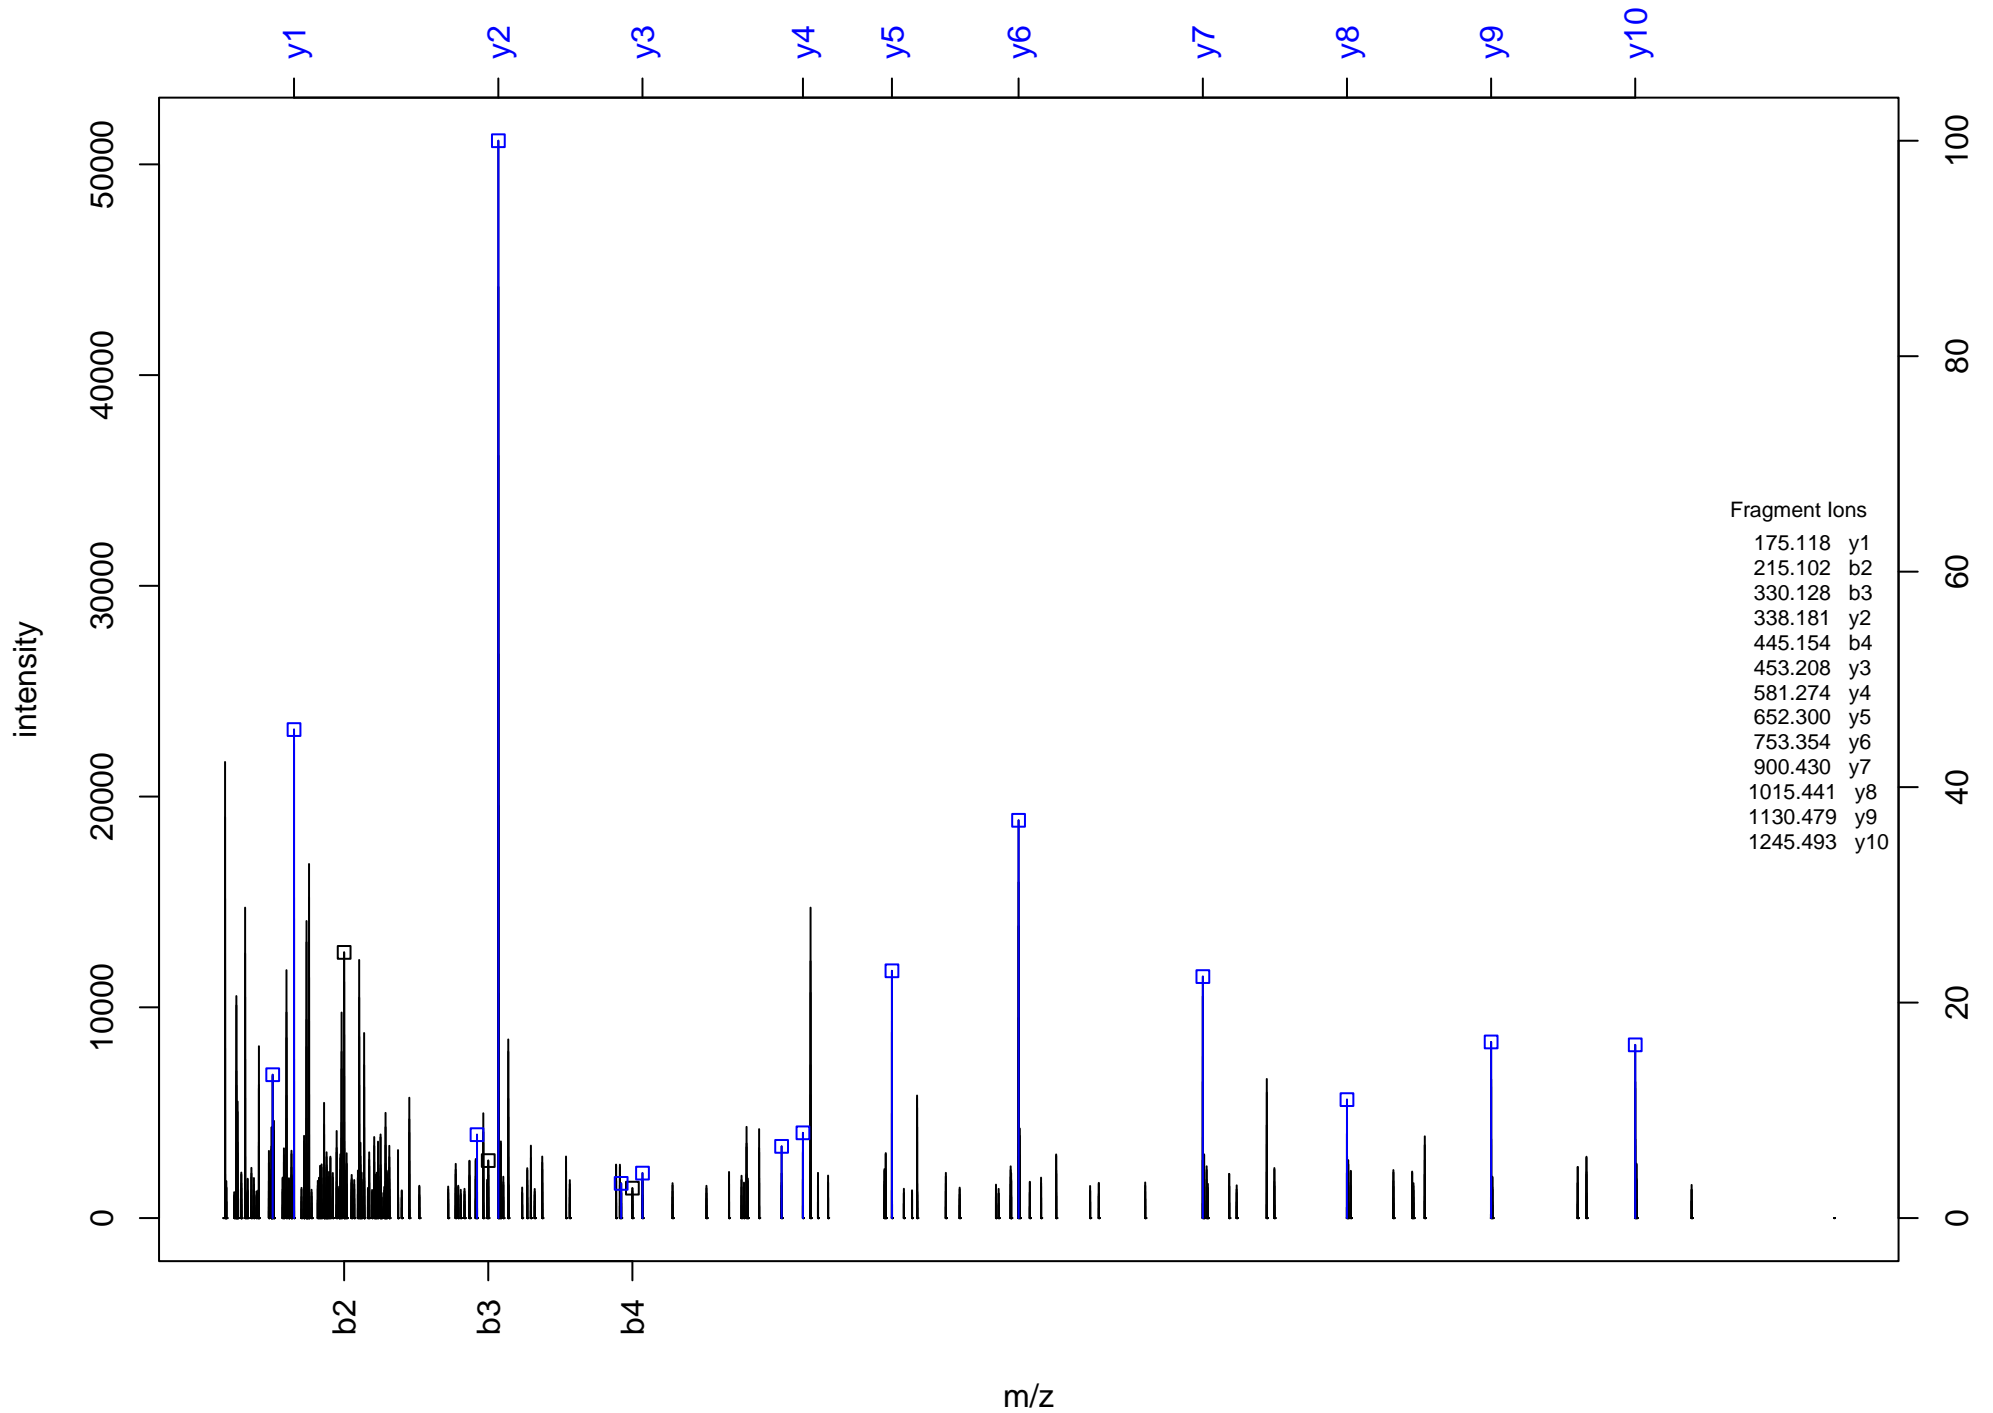

# GPNI VGPY GILQP FADAMK

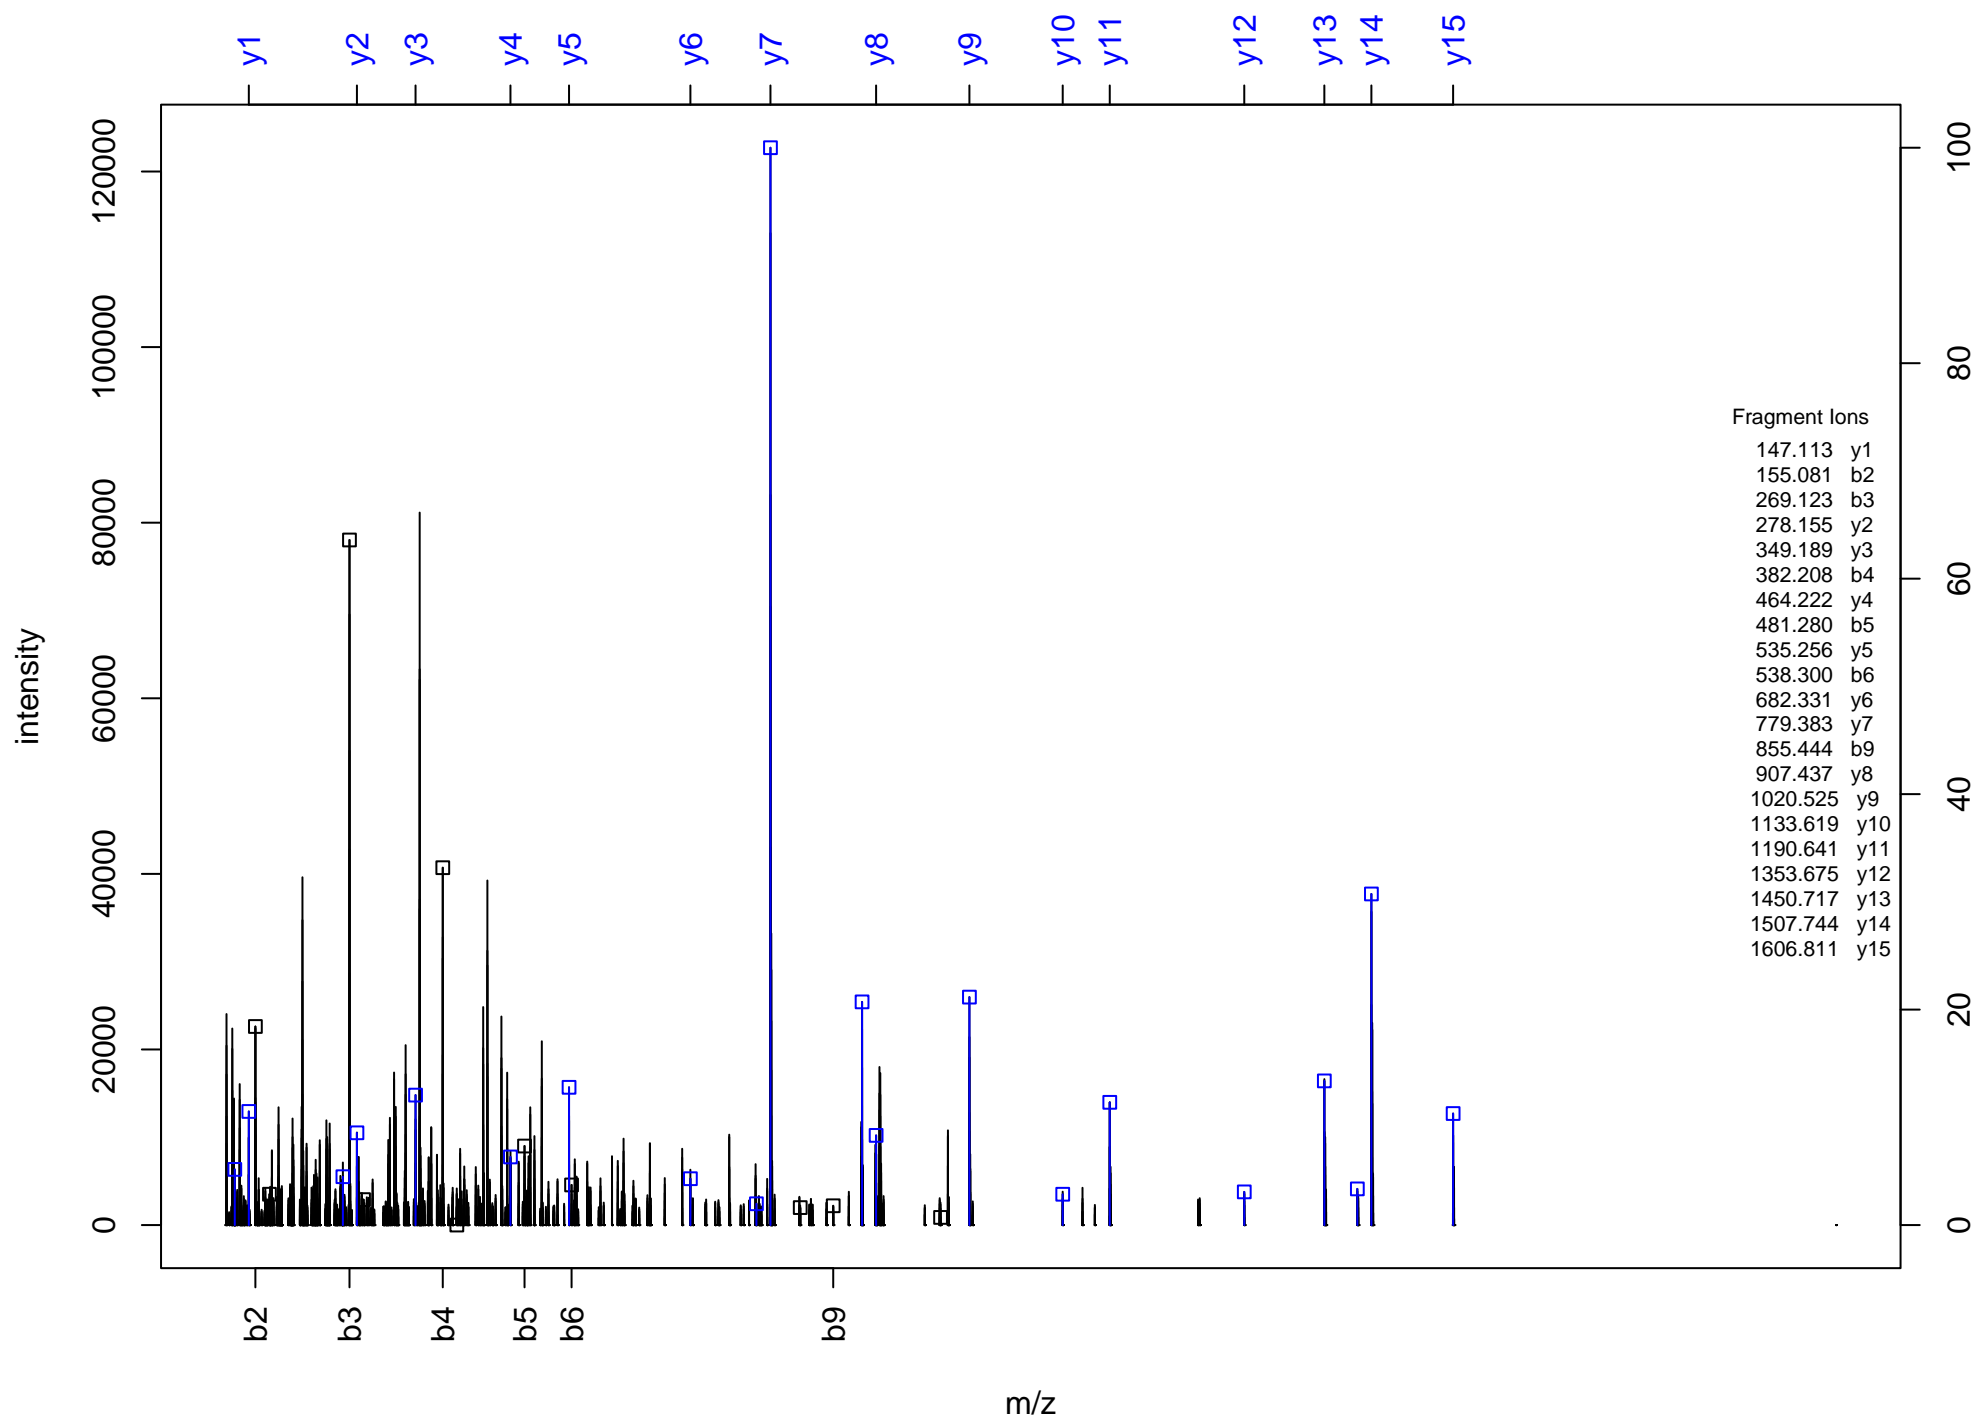

# GTVIDVDHGIICENVPIITPAGEVVASR

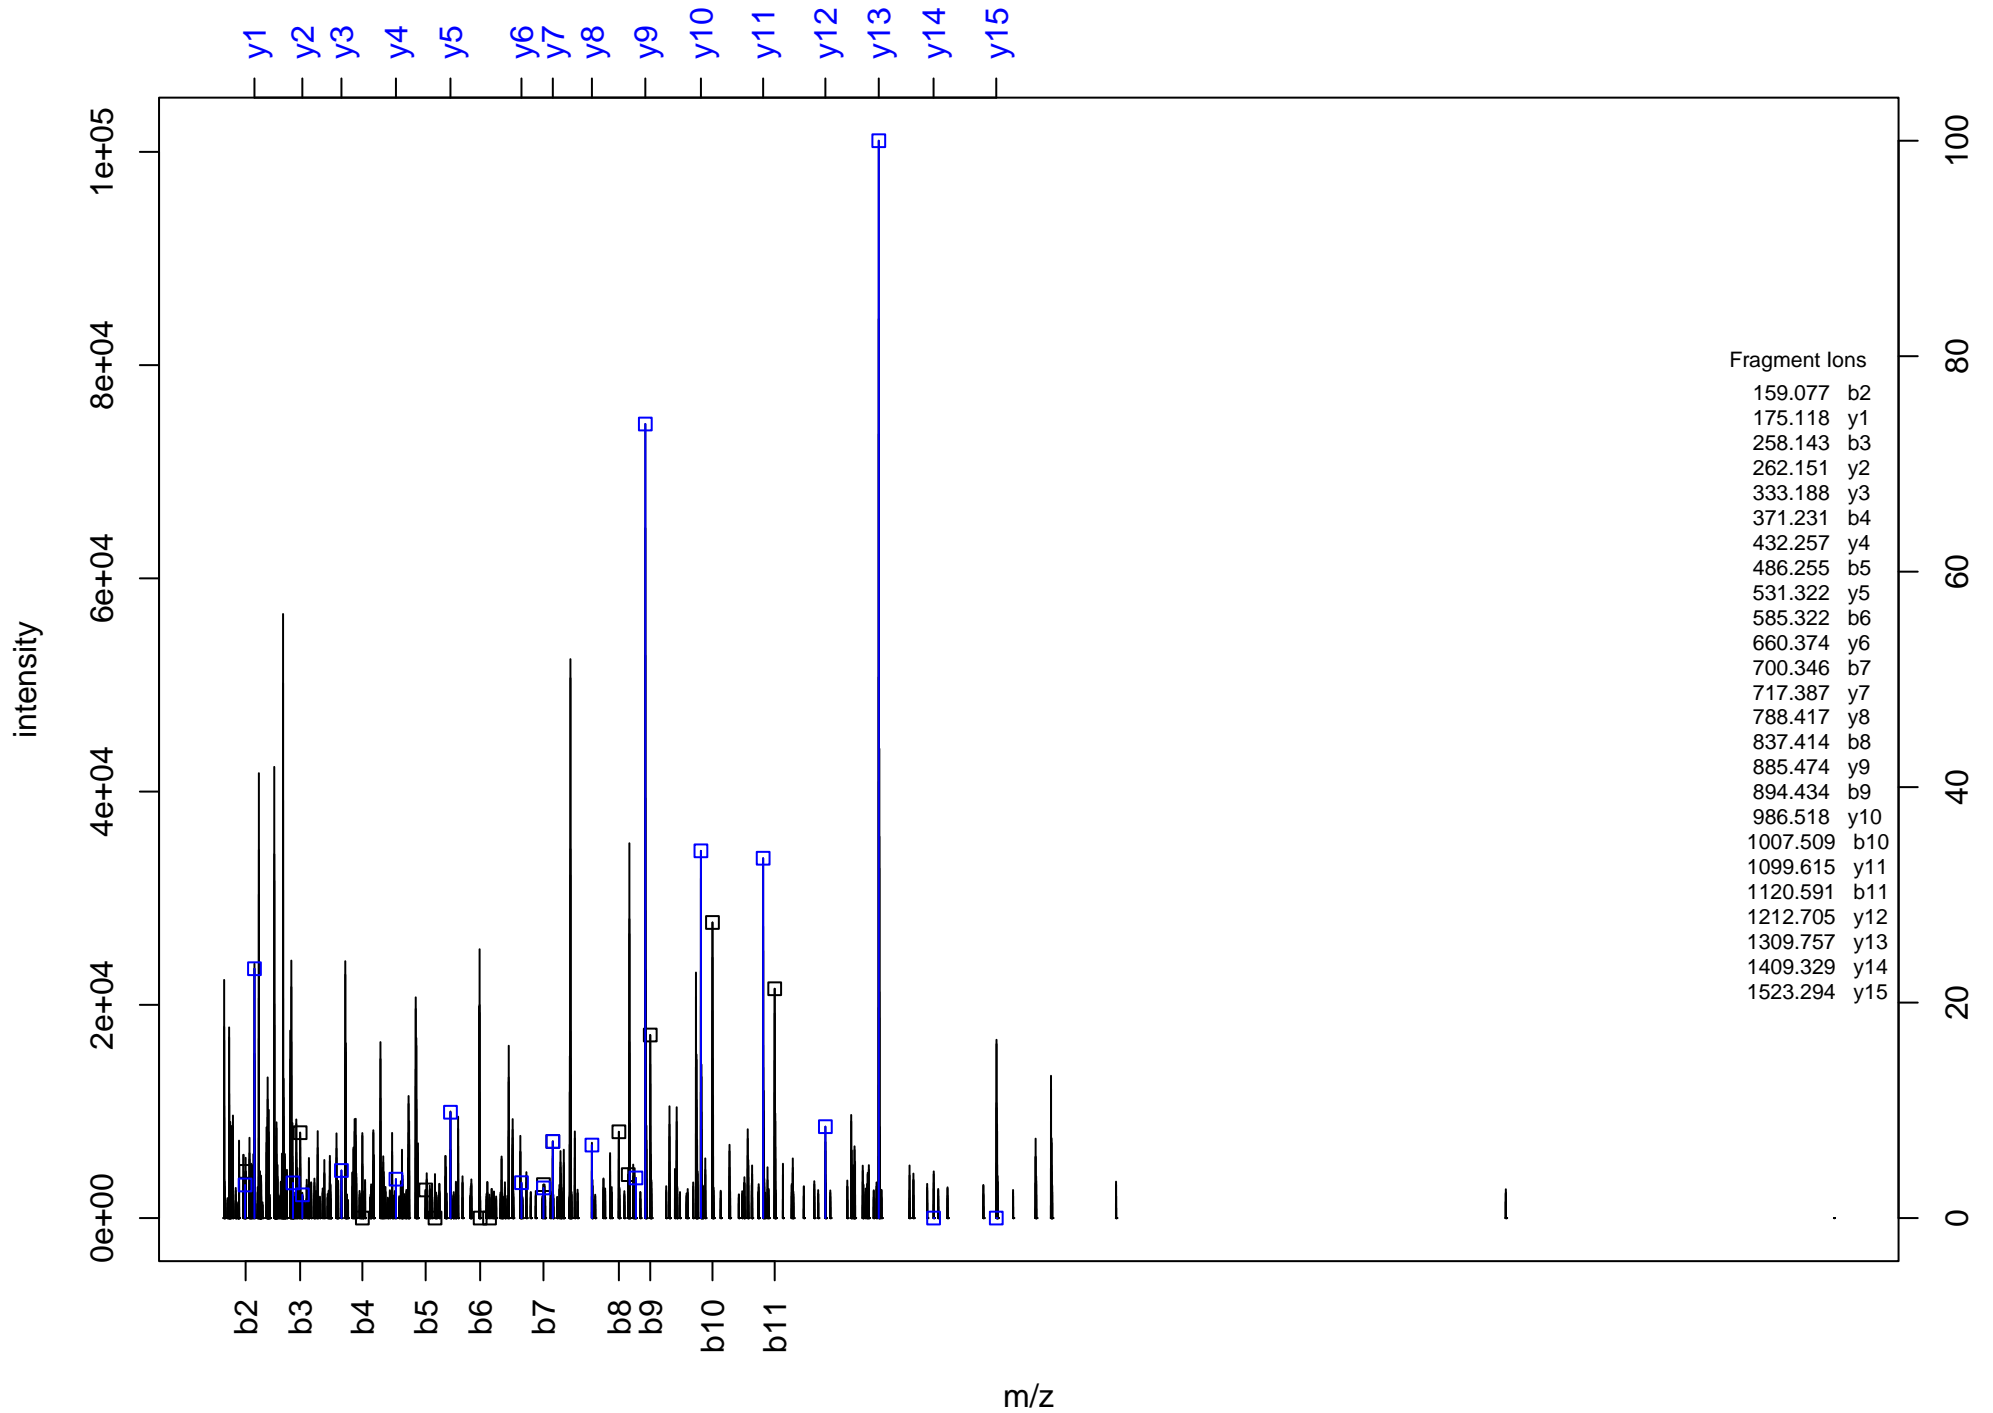



# DQLAADMYNFMAK

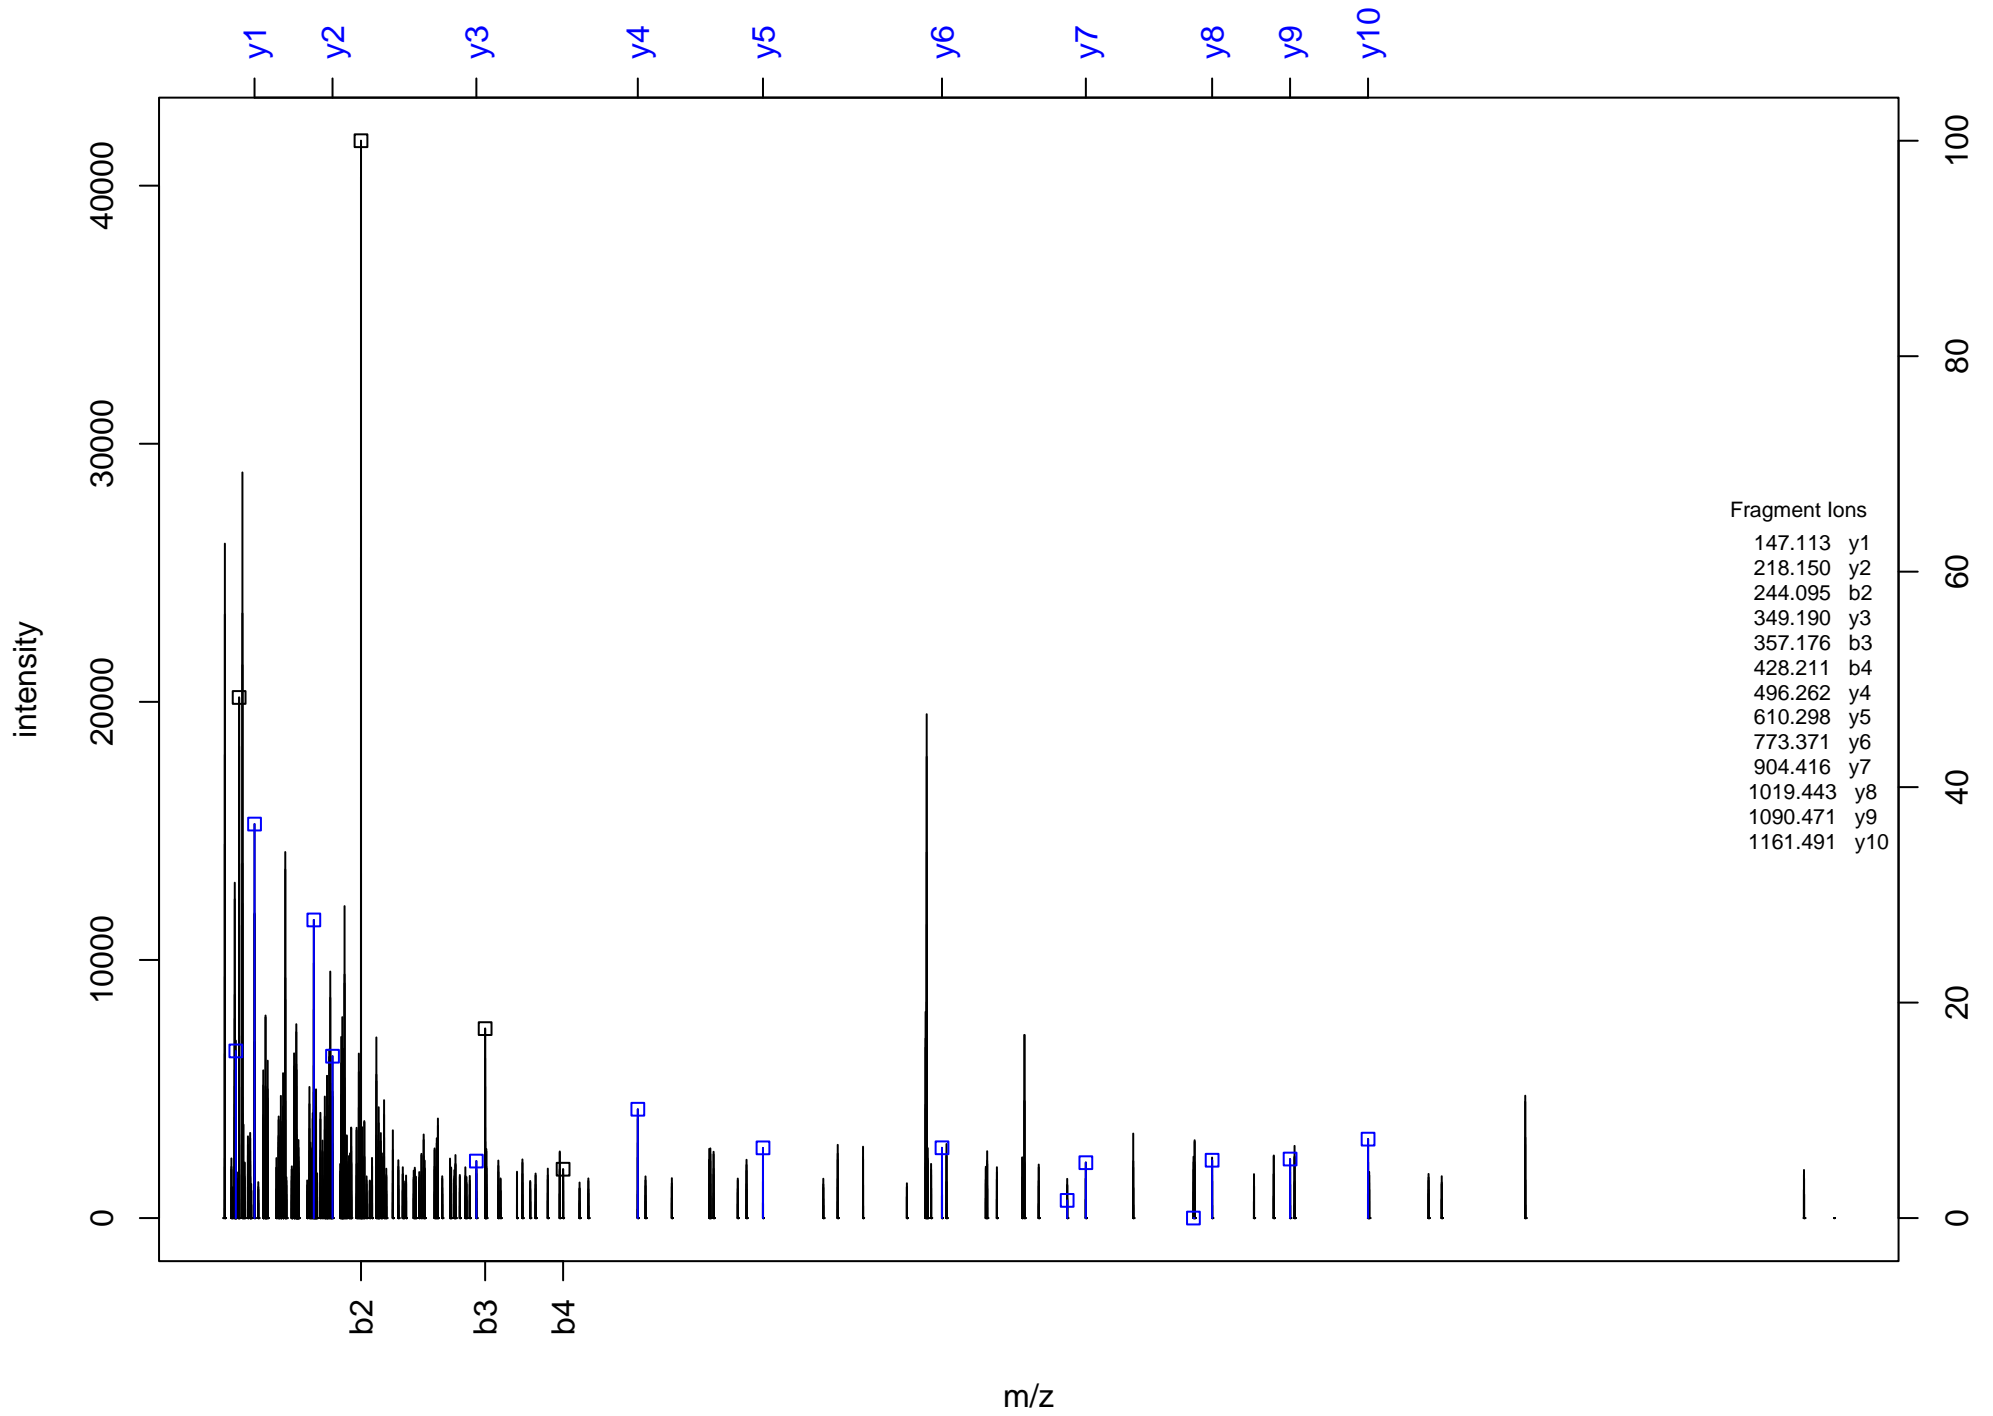

# GLDEDETNFLDEVSR

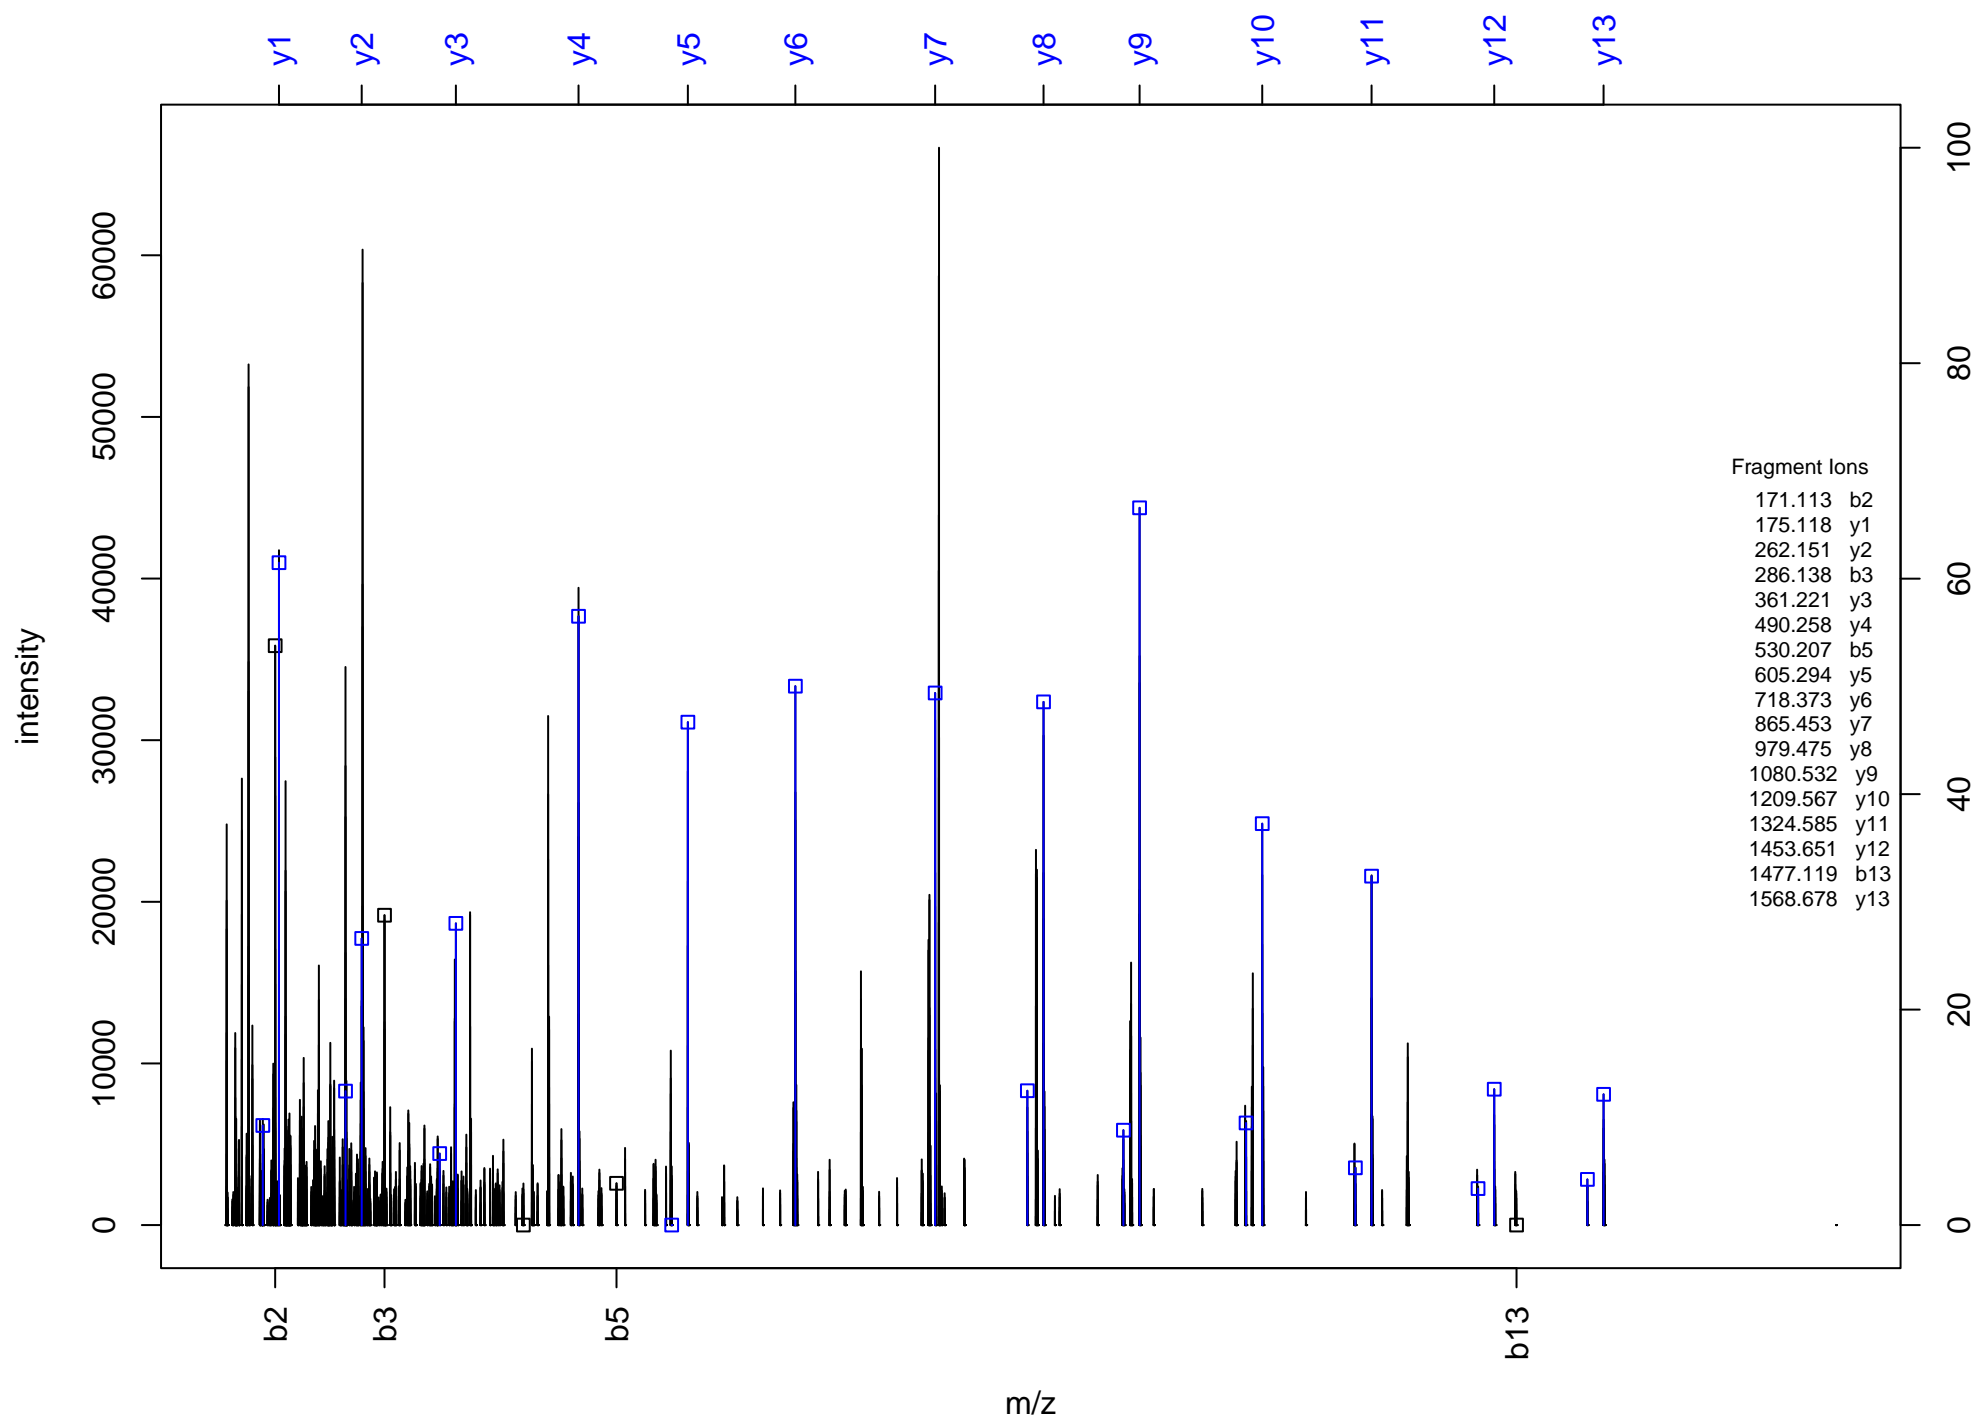

# SVNPWDTQVPLETR

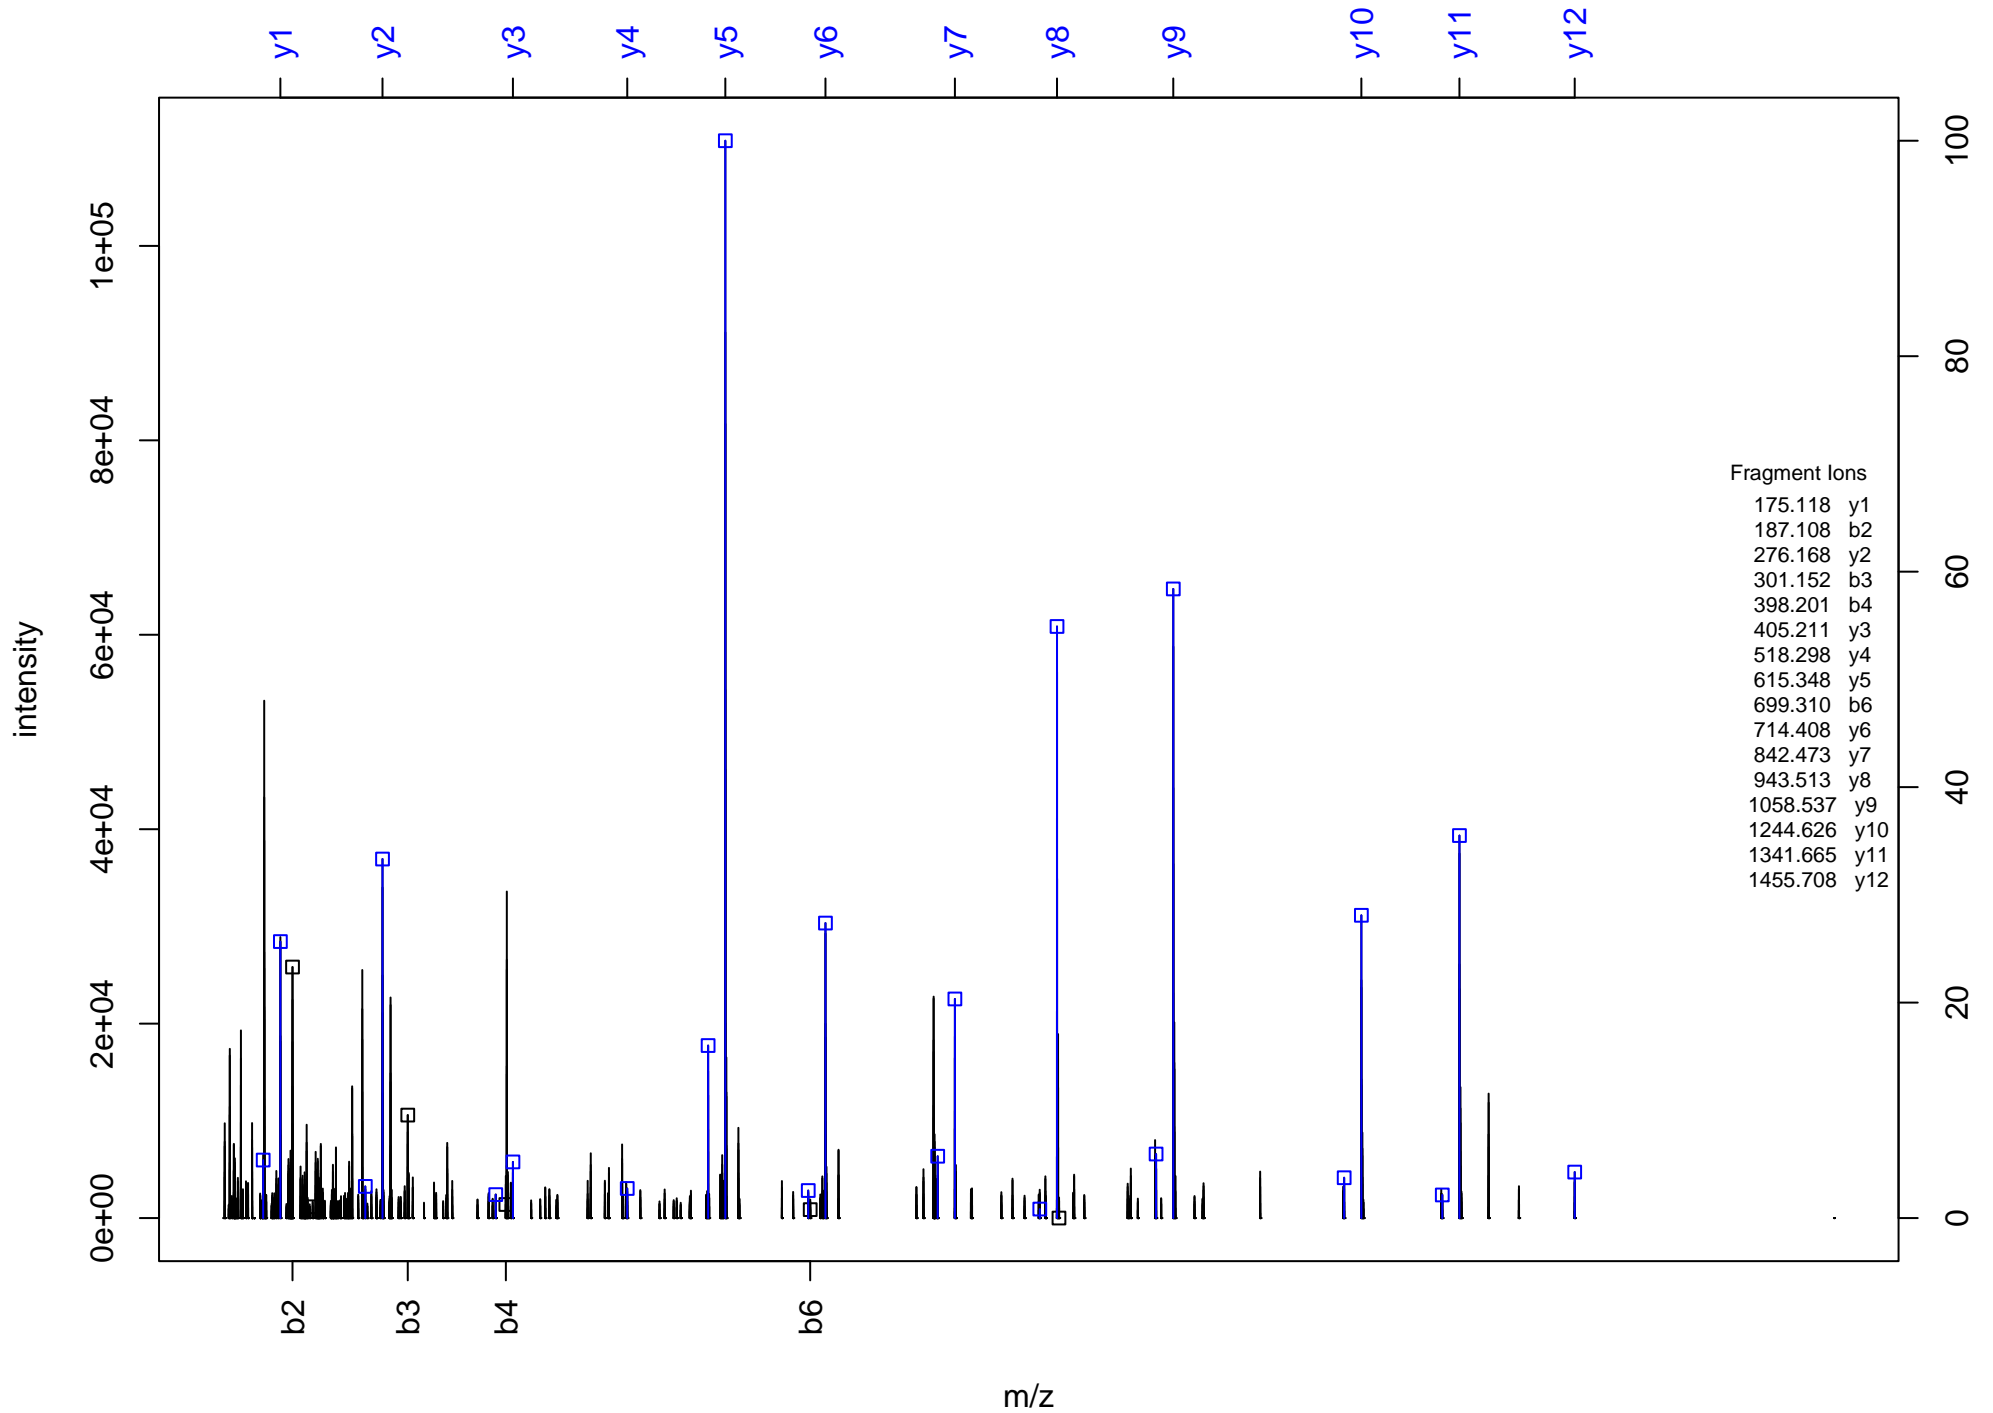

# SFQQQMQLNYLK

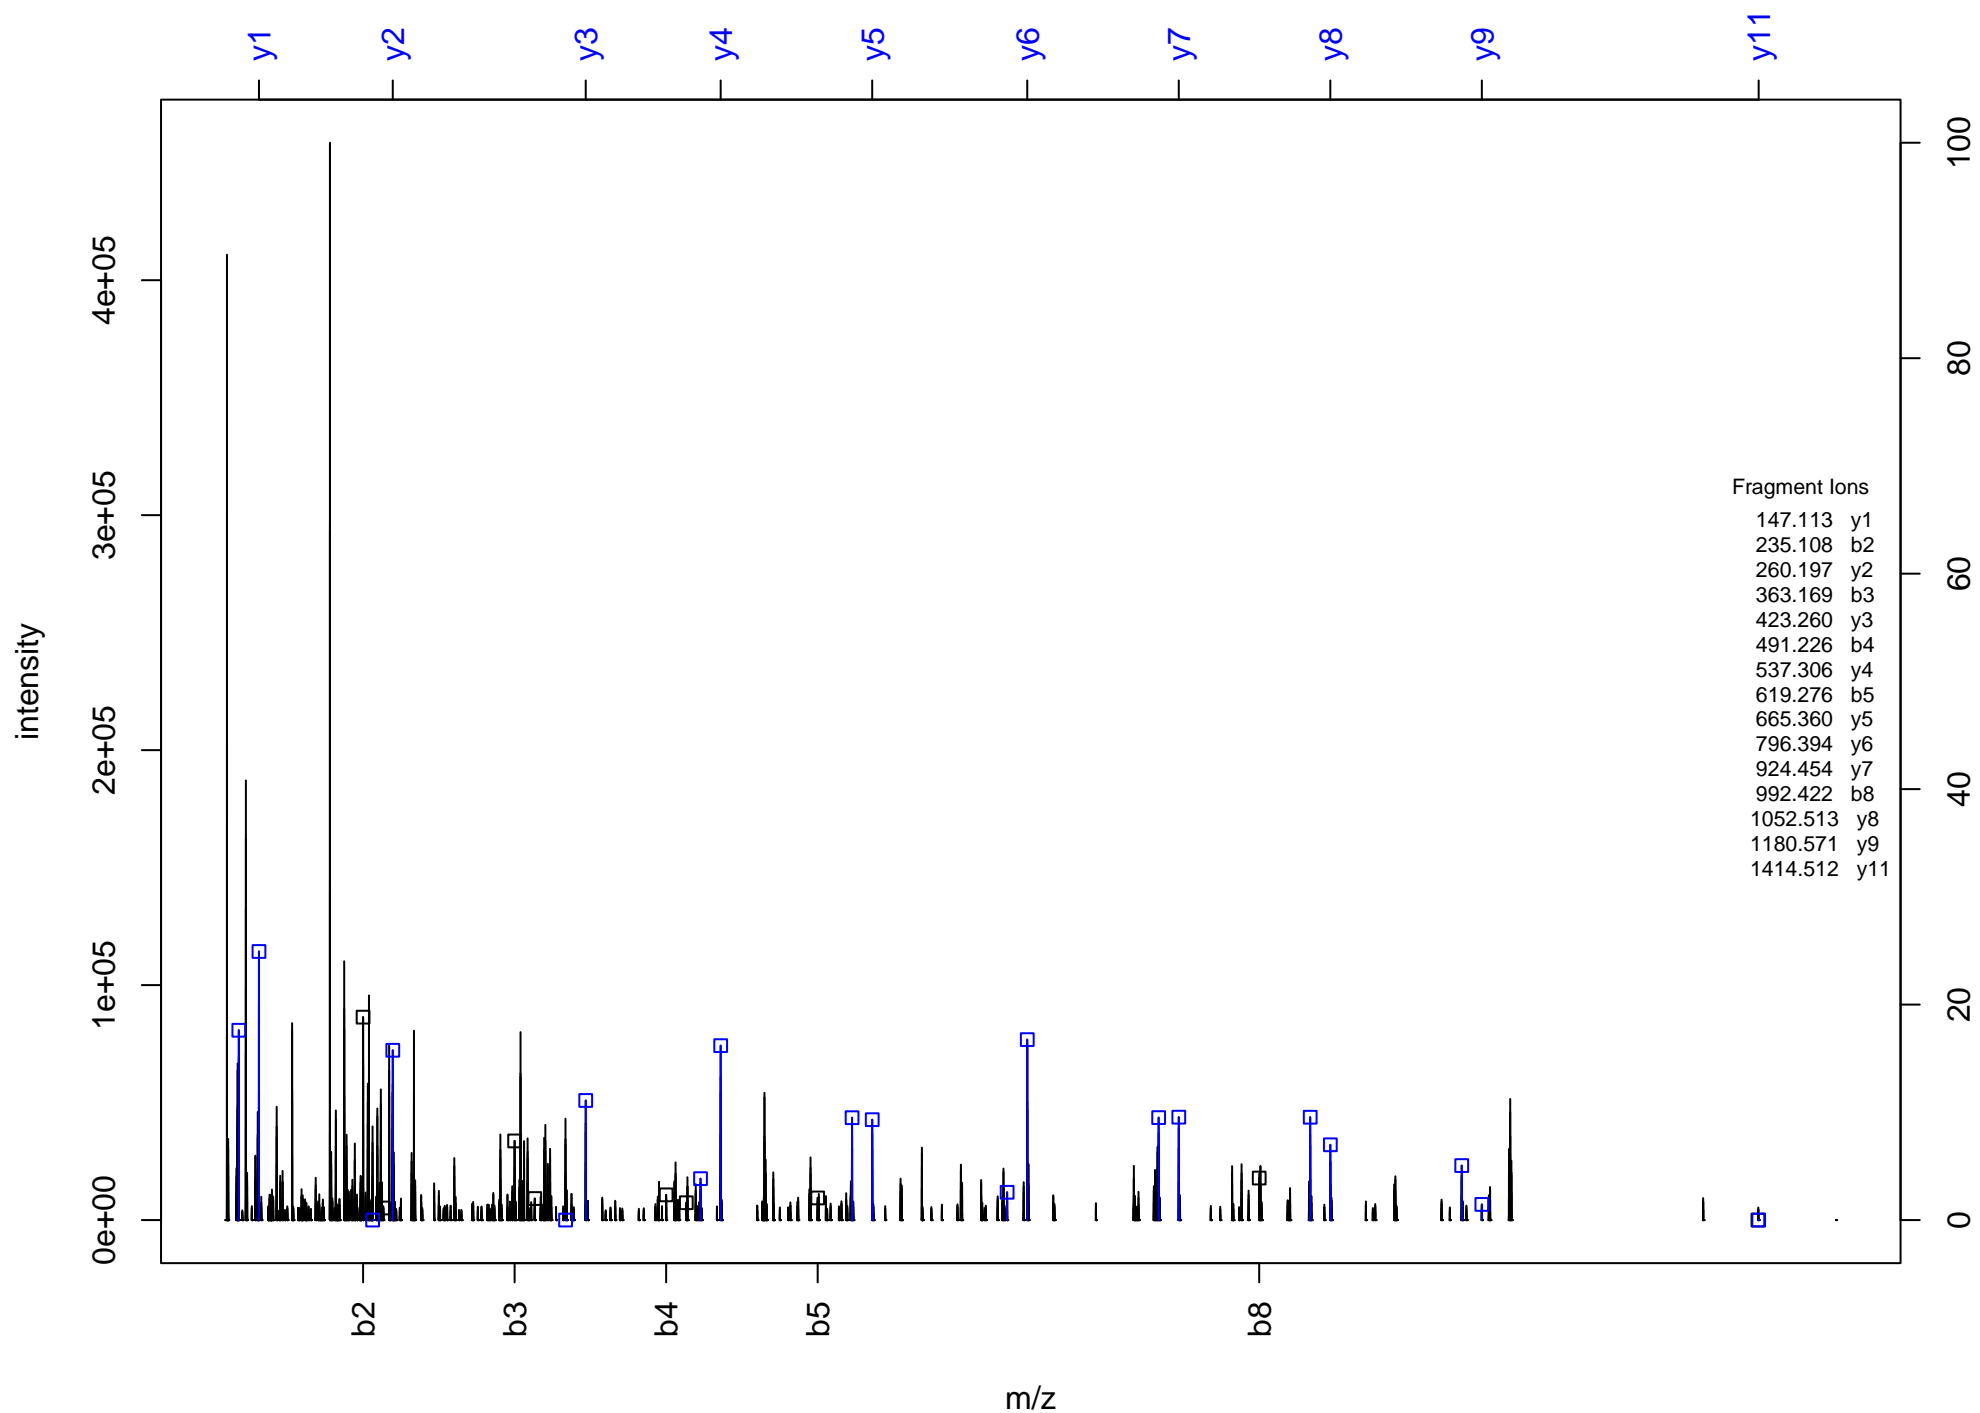

# SLENVLEINK

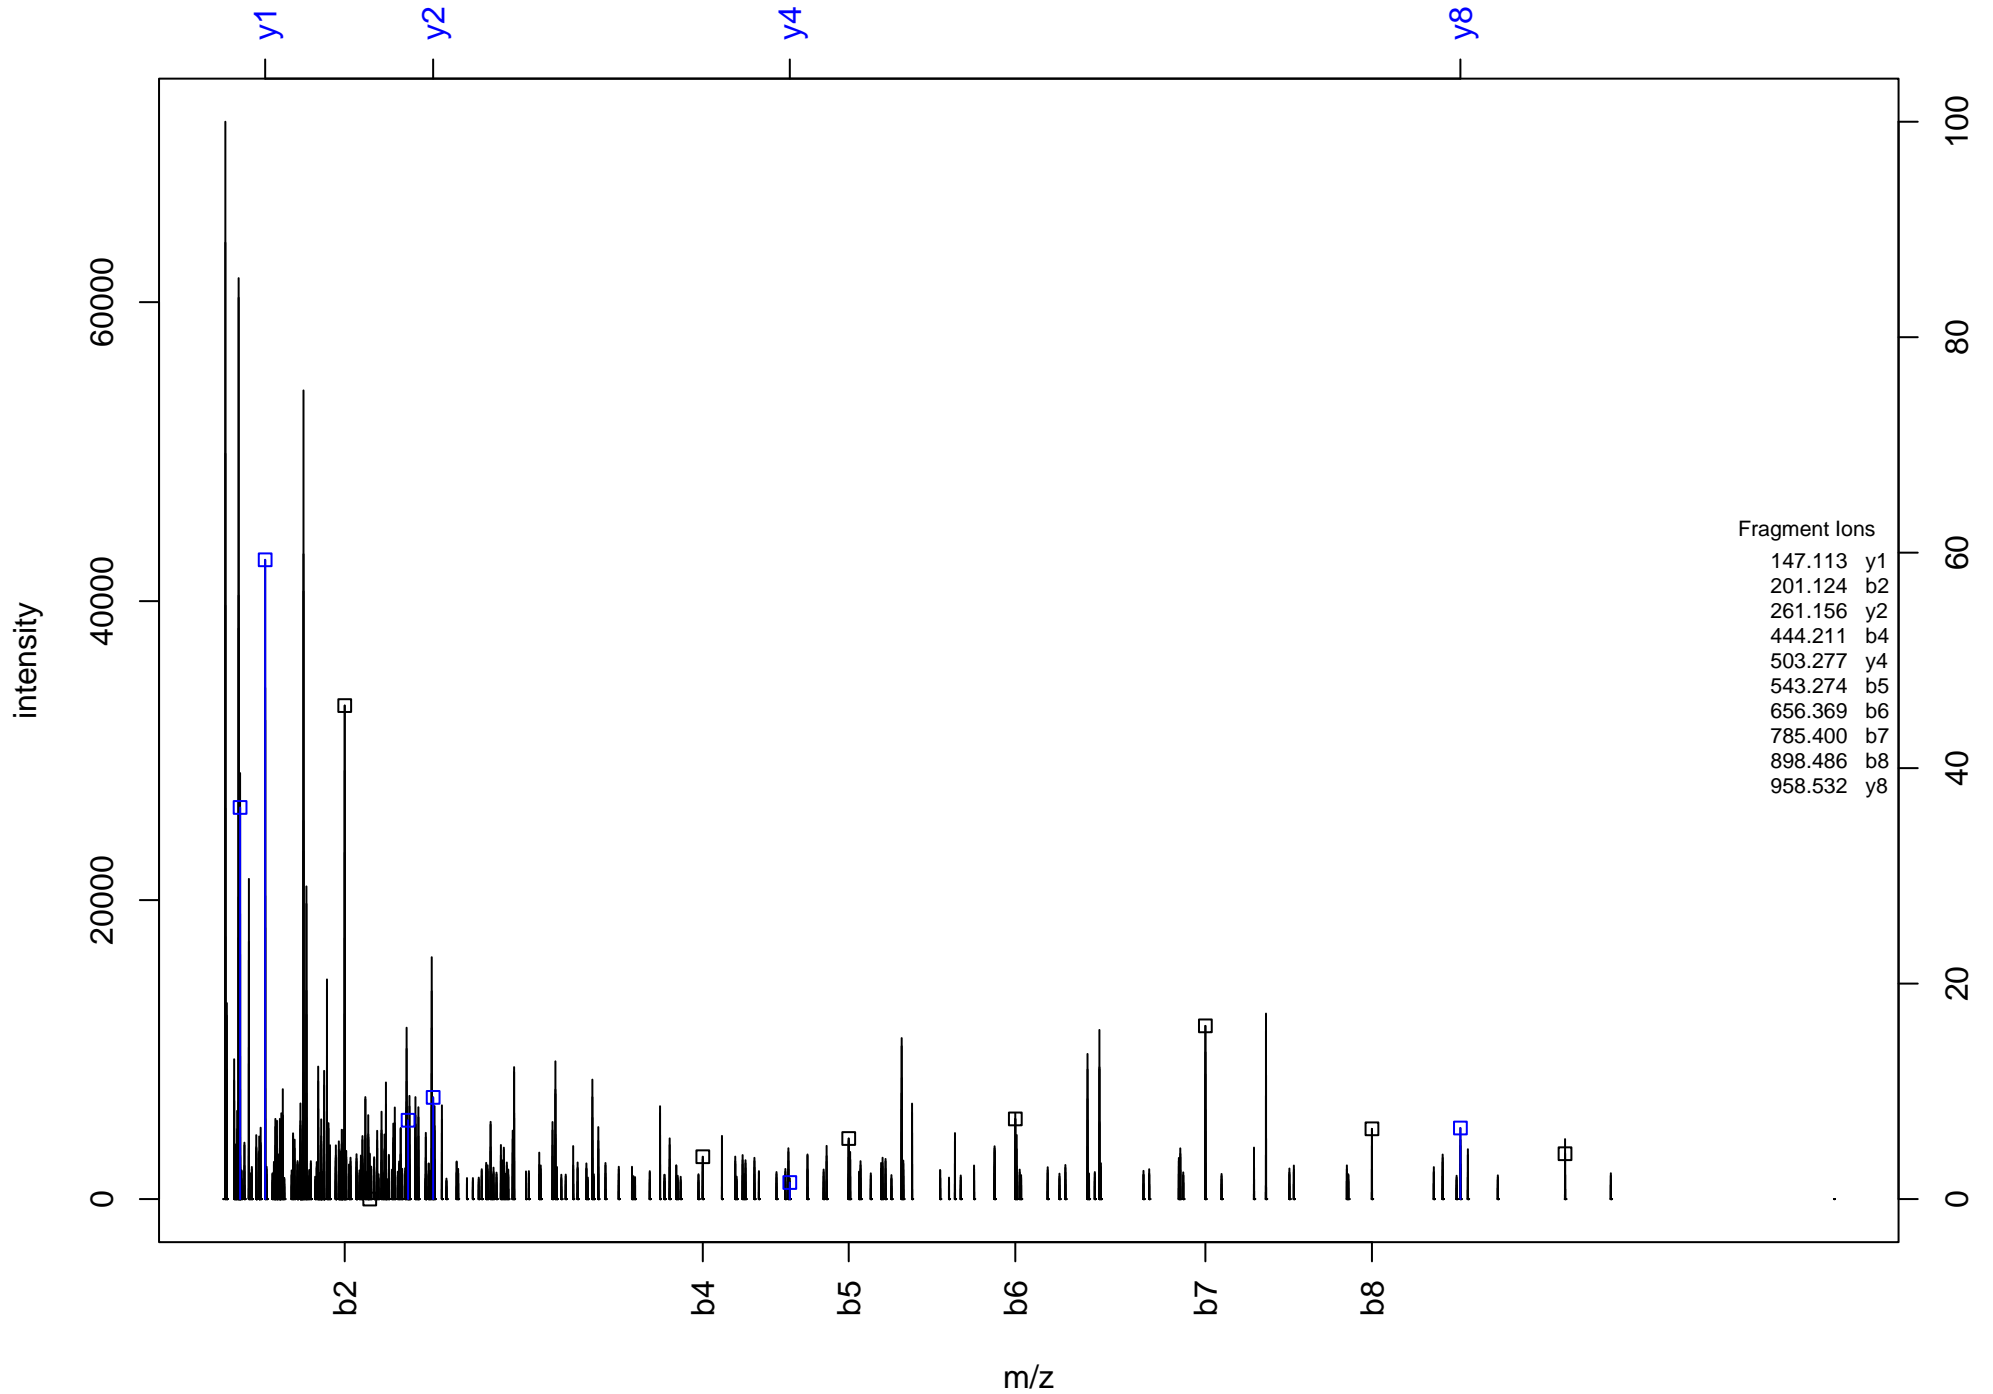

# VATVSLPR

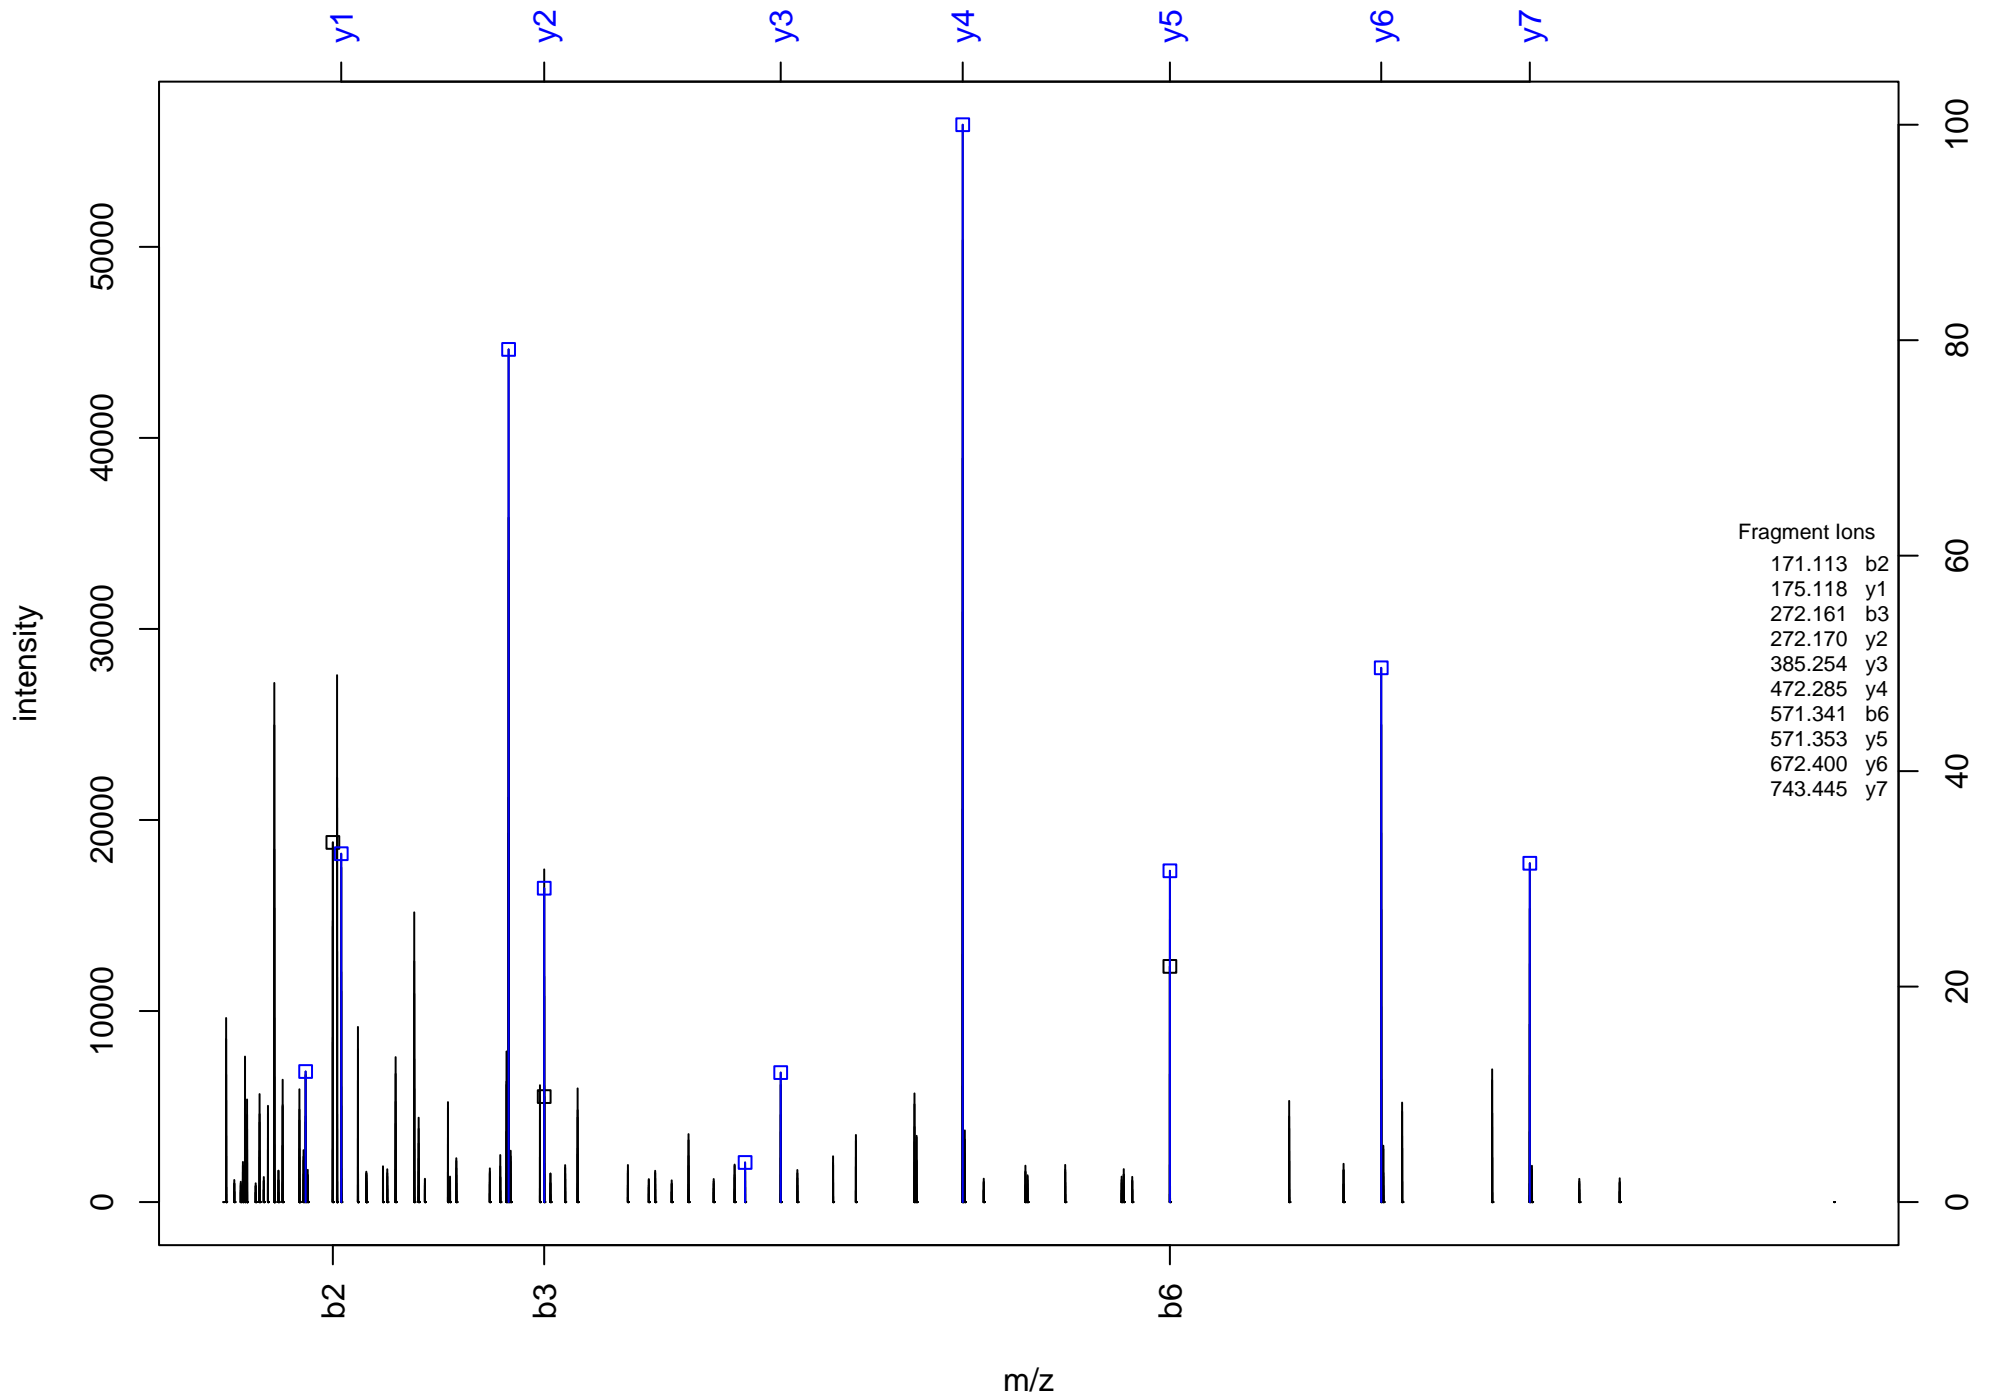

# FVAPEEVLPFTEGDILEK

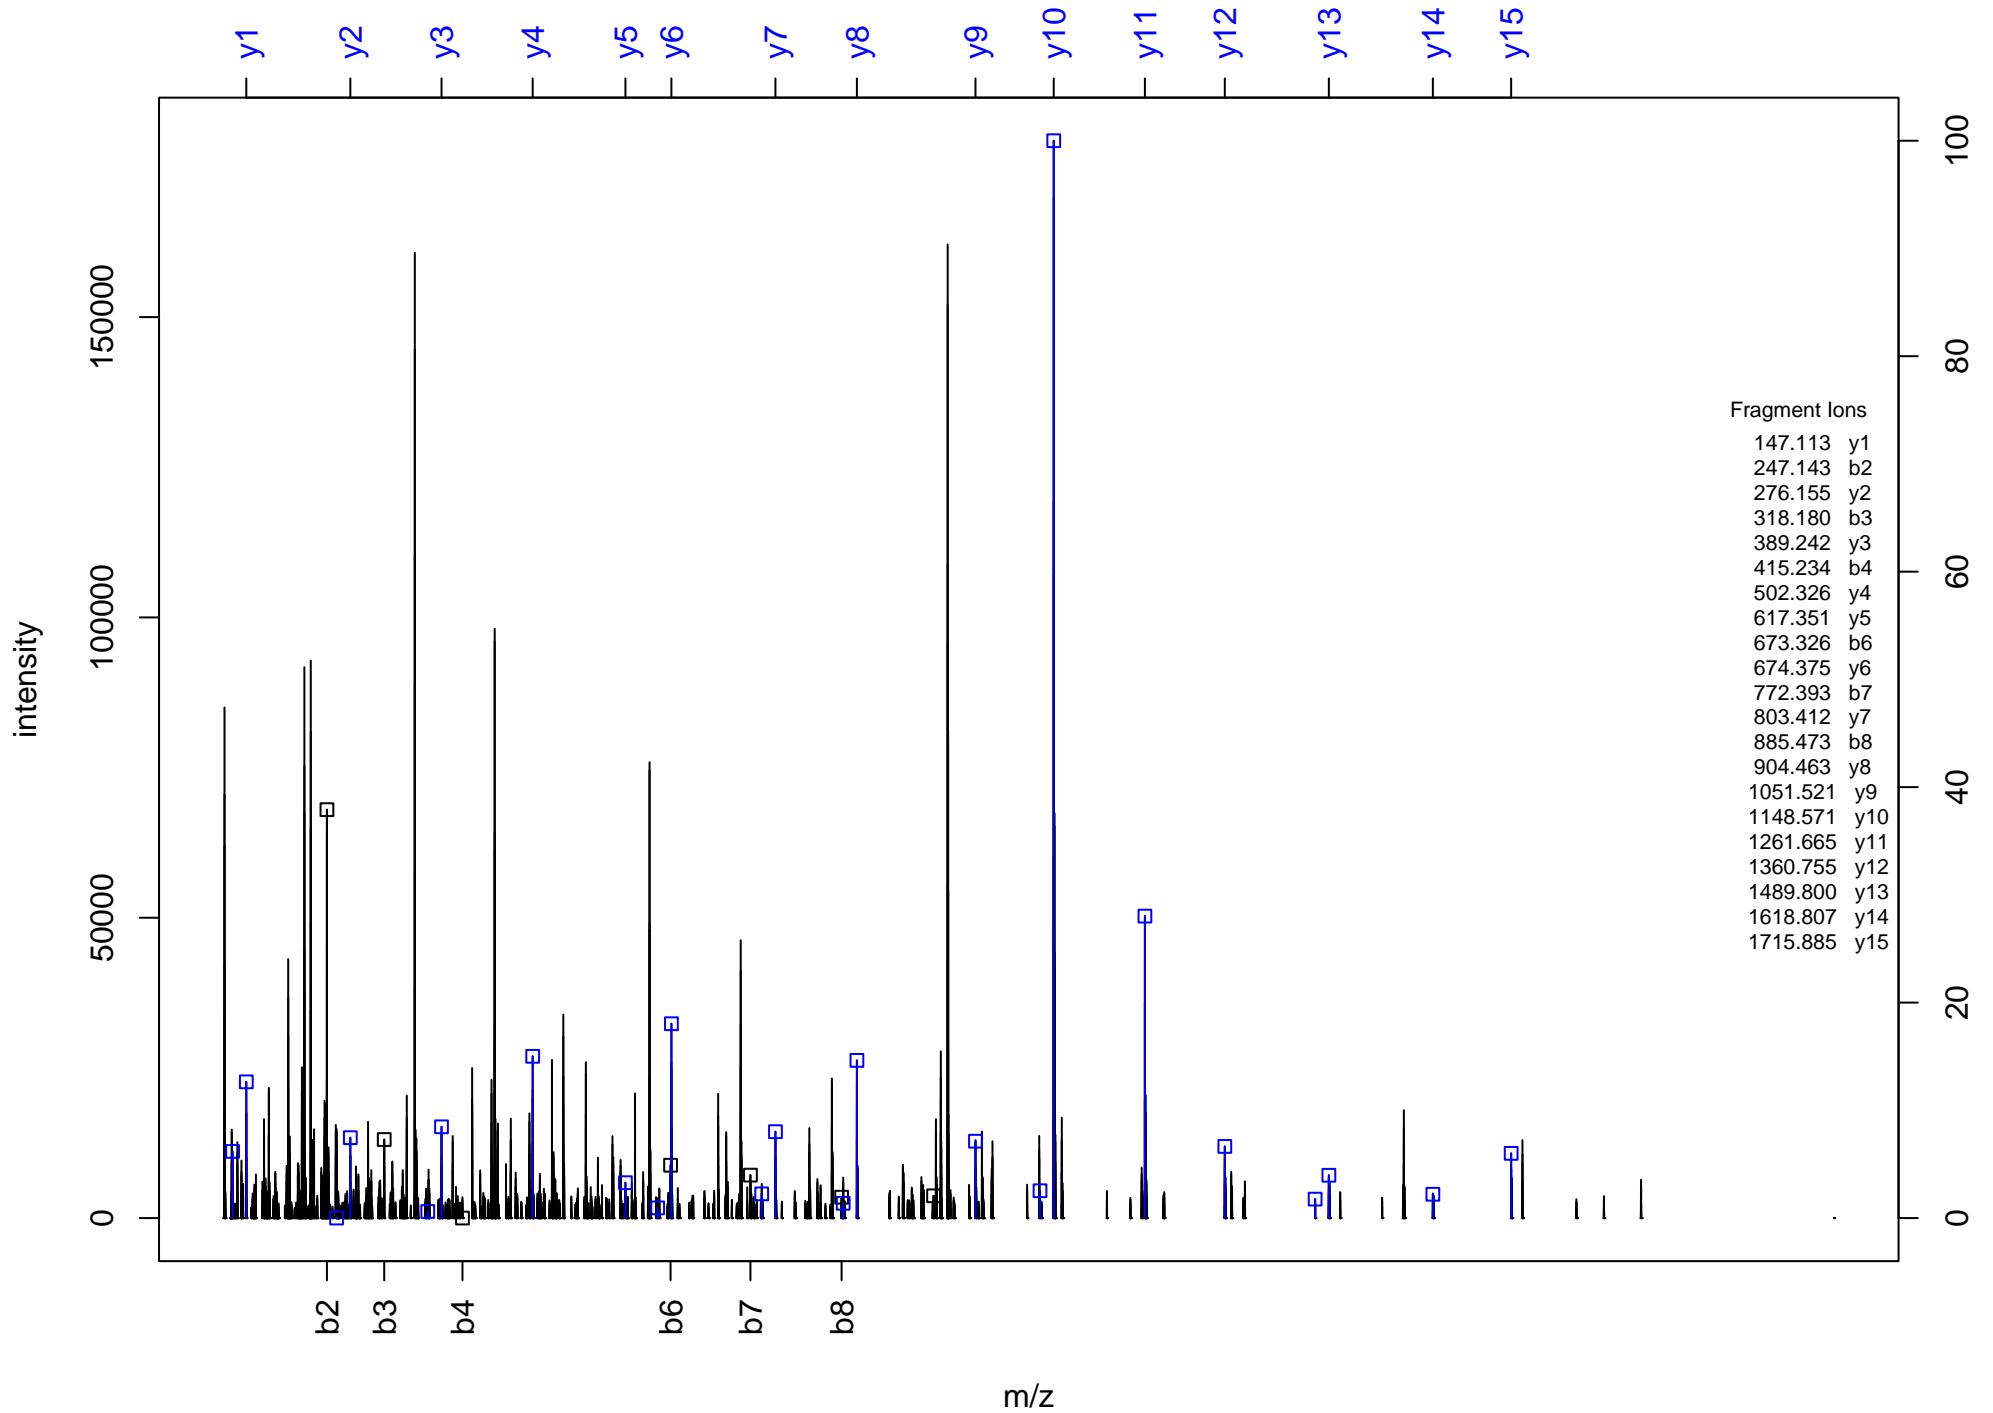

# LPVDFSNIPTYLLK

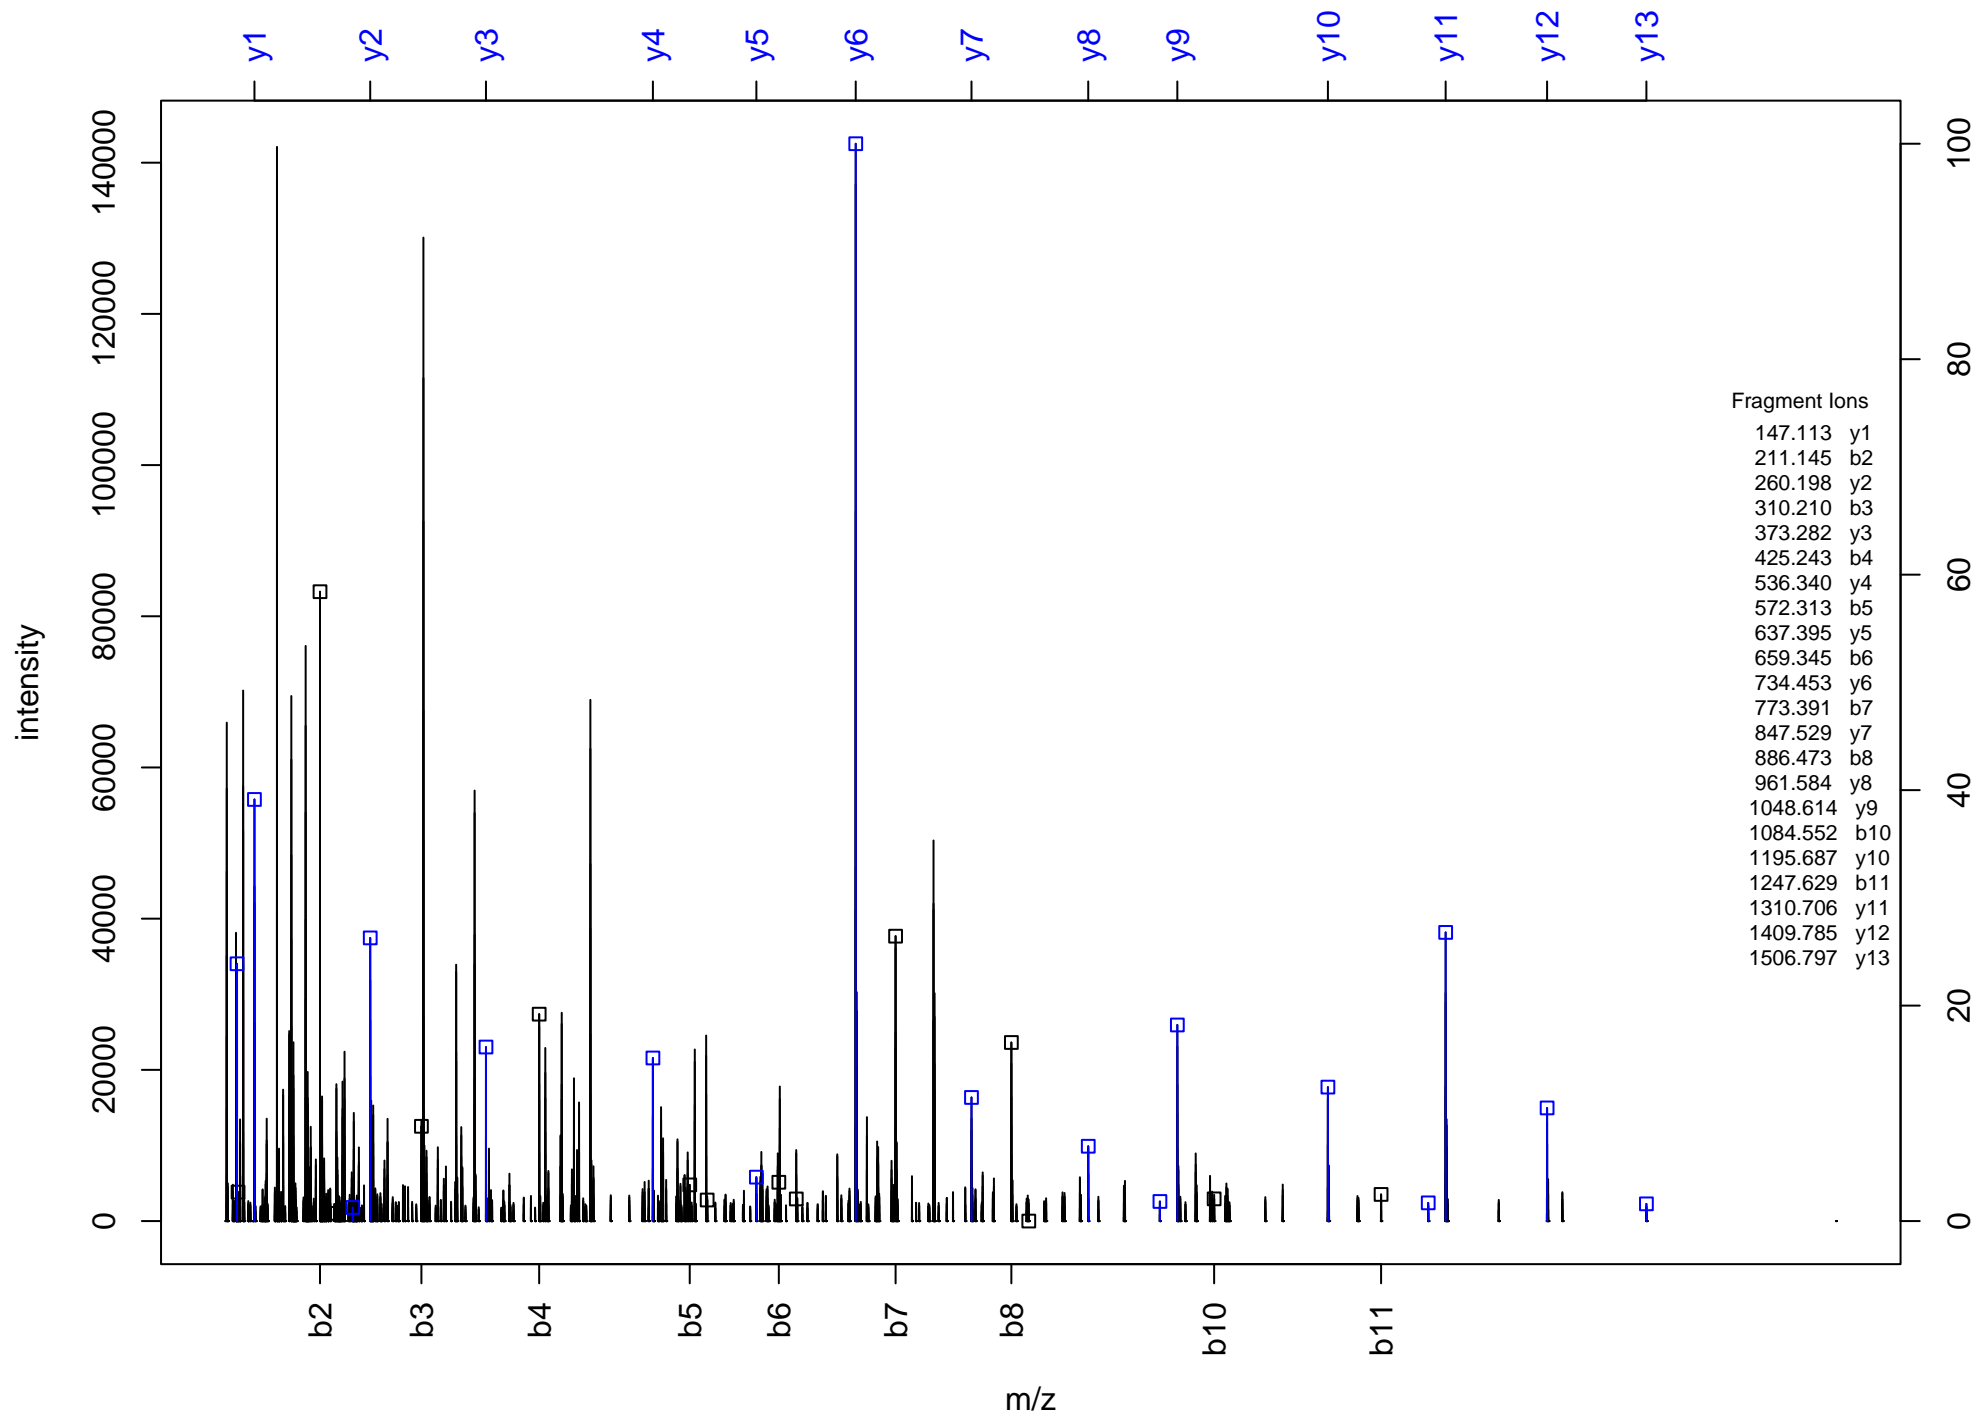



# LAPPEVVIATEAPPPSLVDR

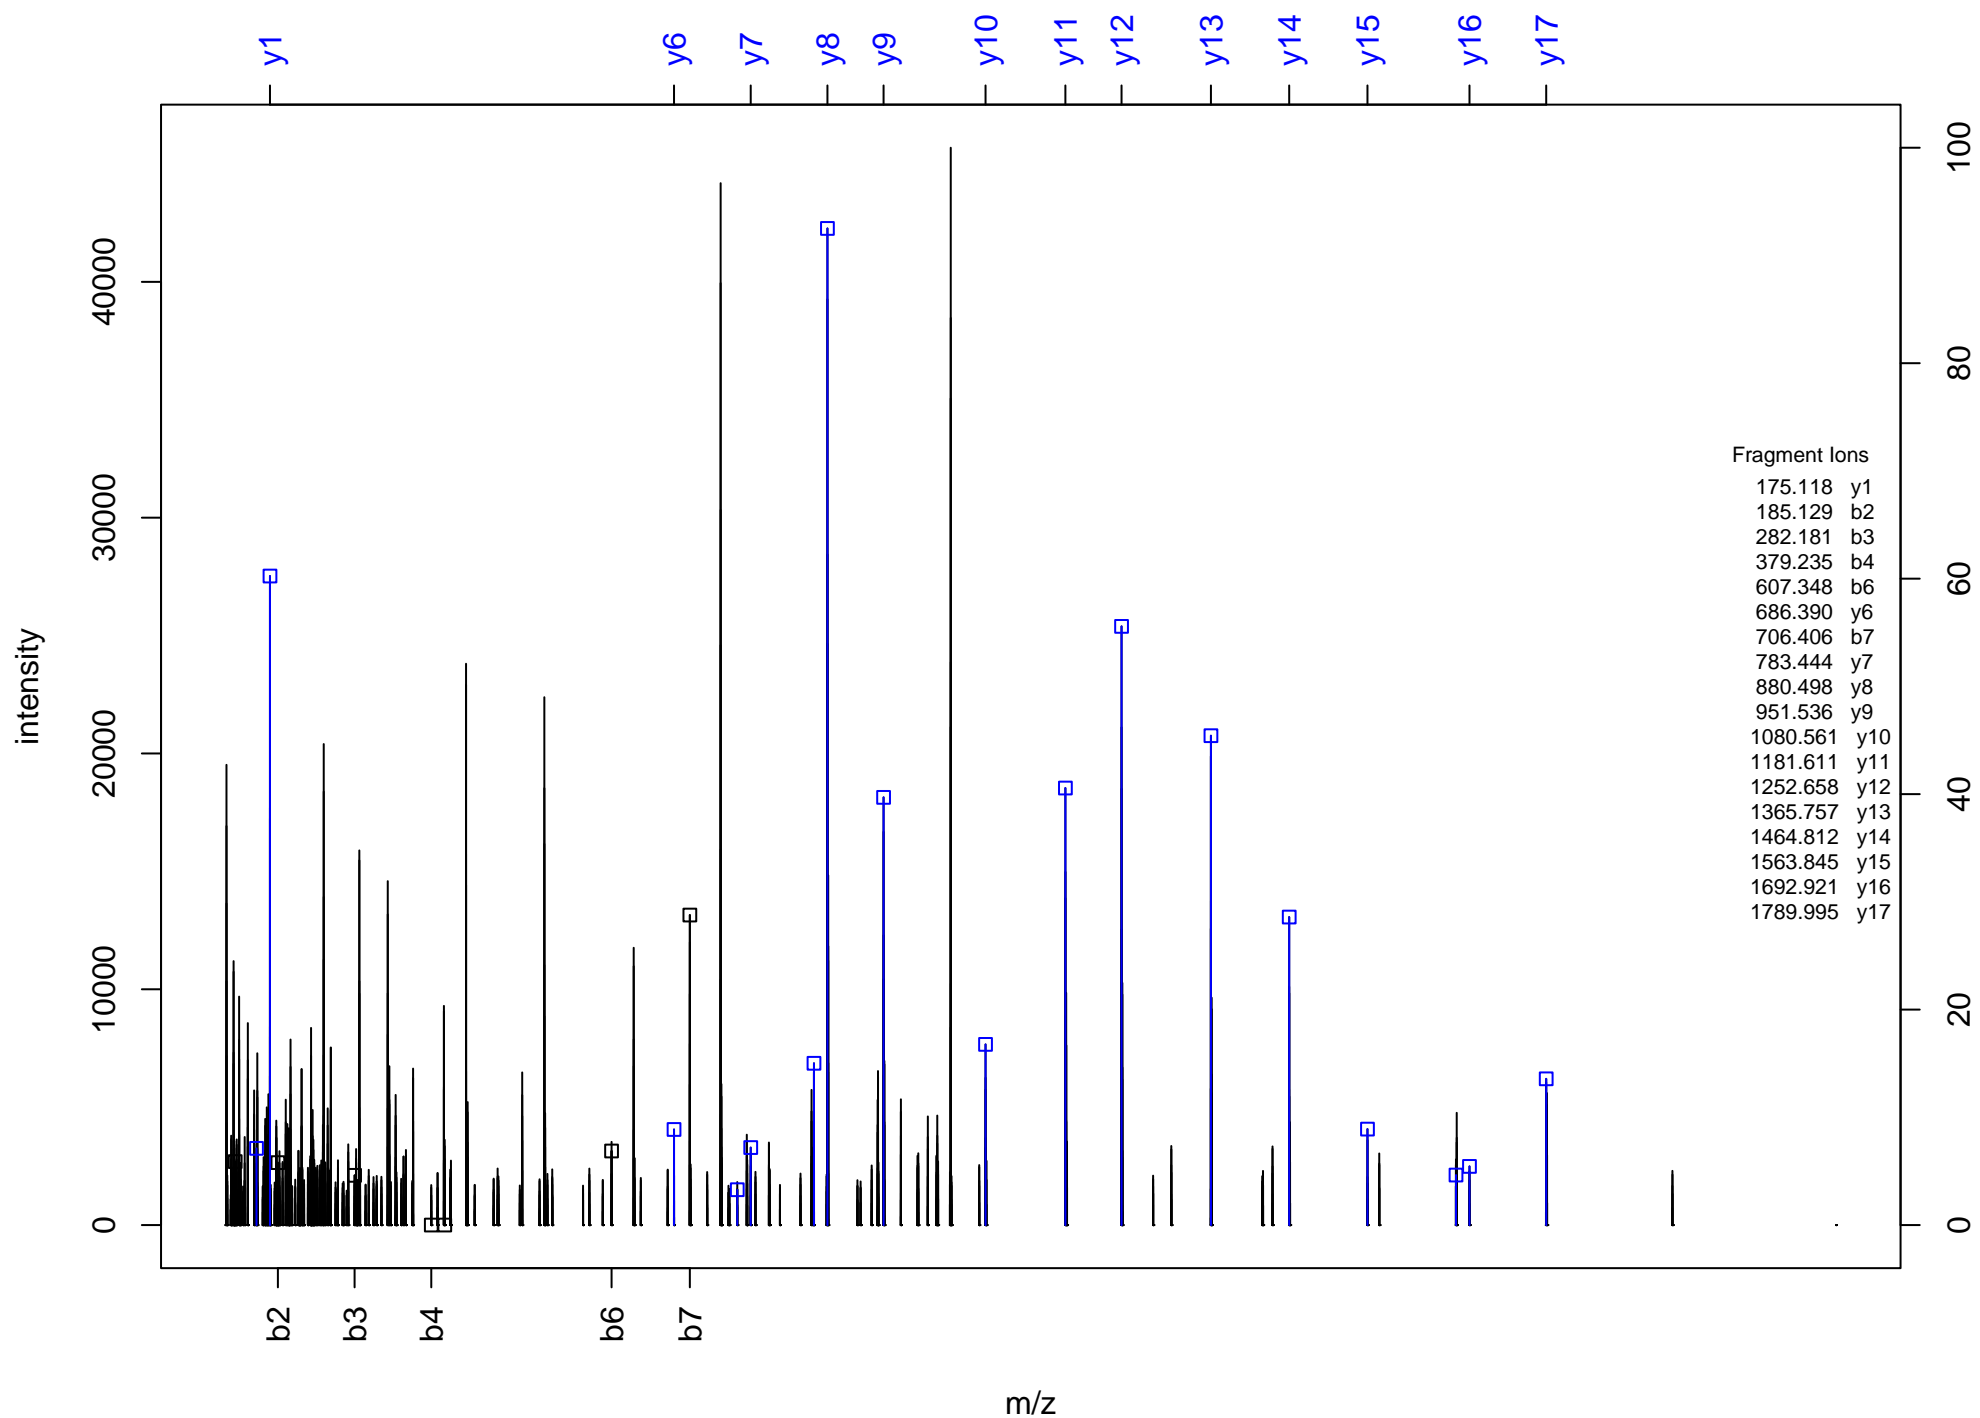

(Ac)M\*GVAIKEN^Q^TQSKM\*DFWNMGIK

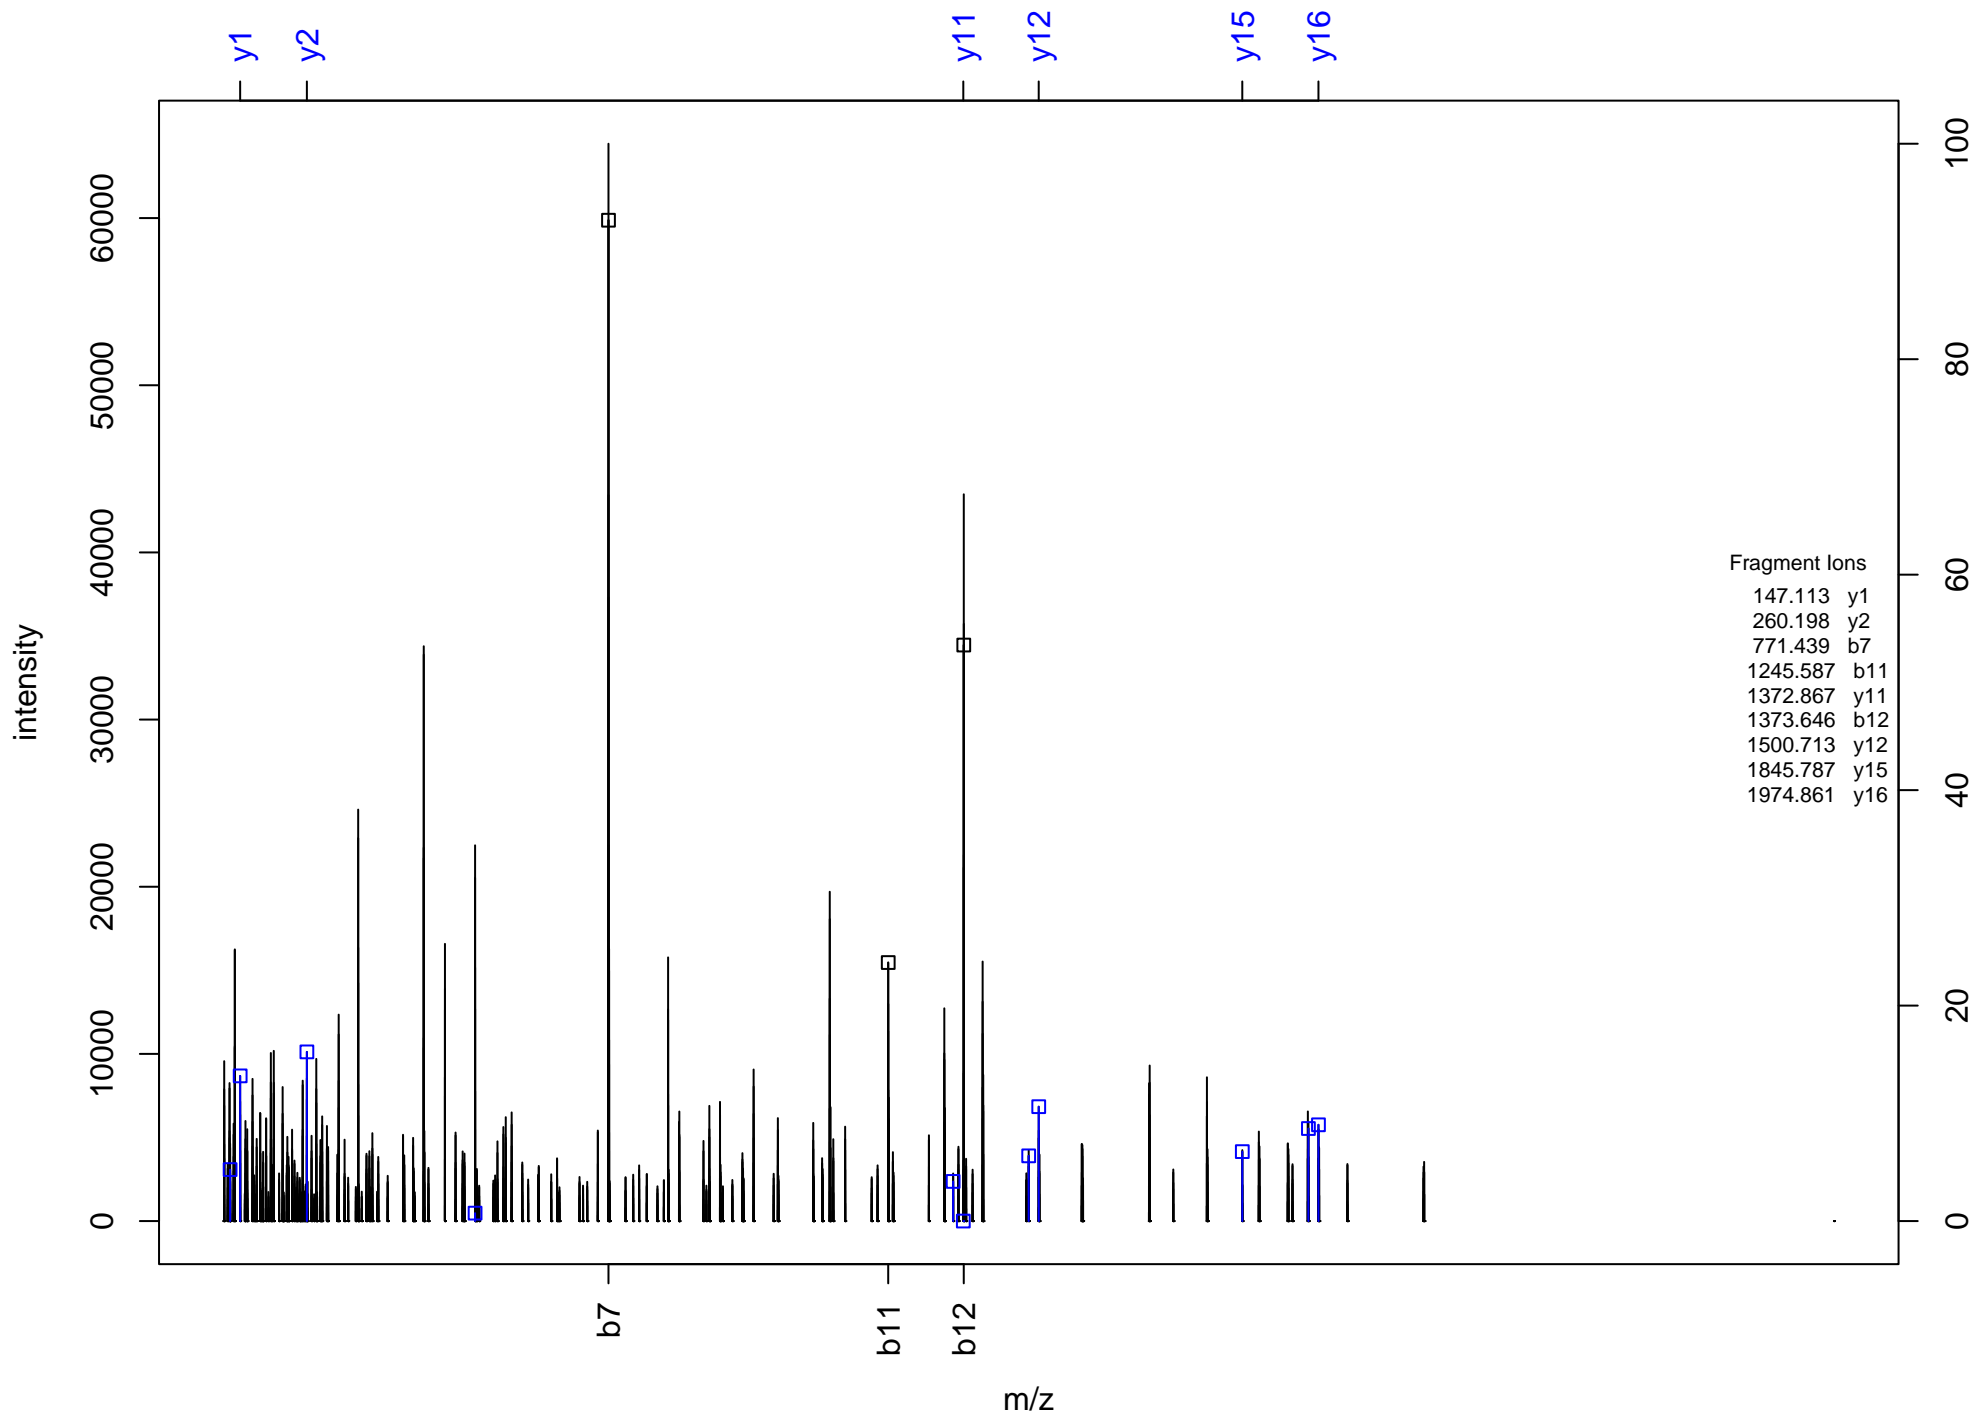

# SGTGIAAMSVMRPELIMK

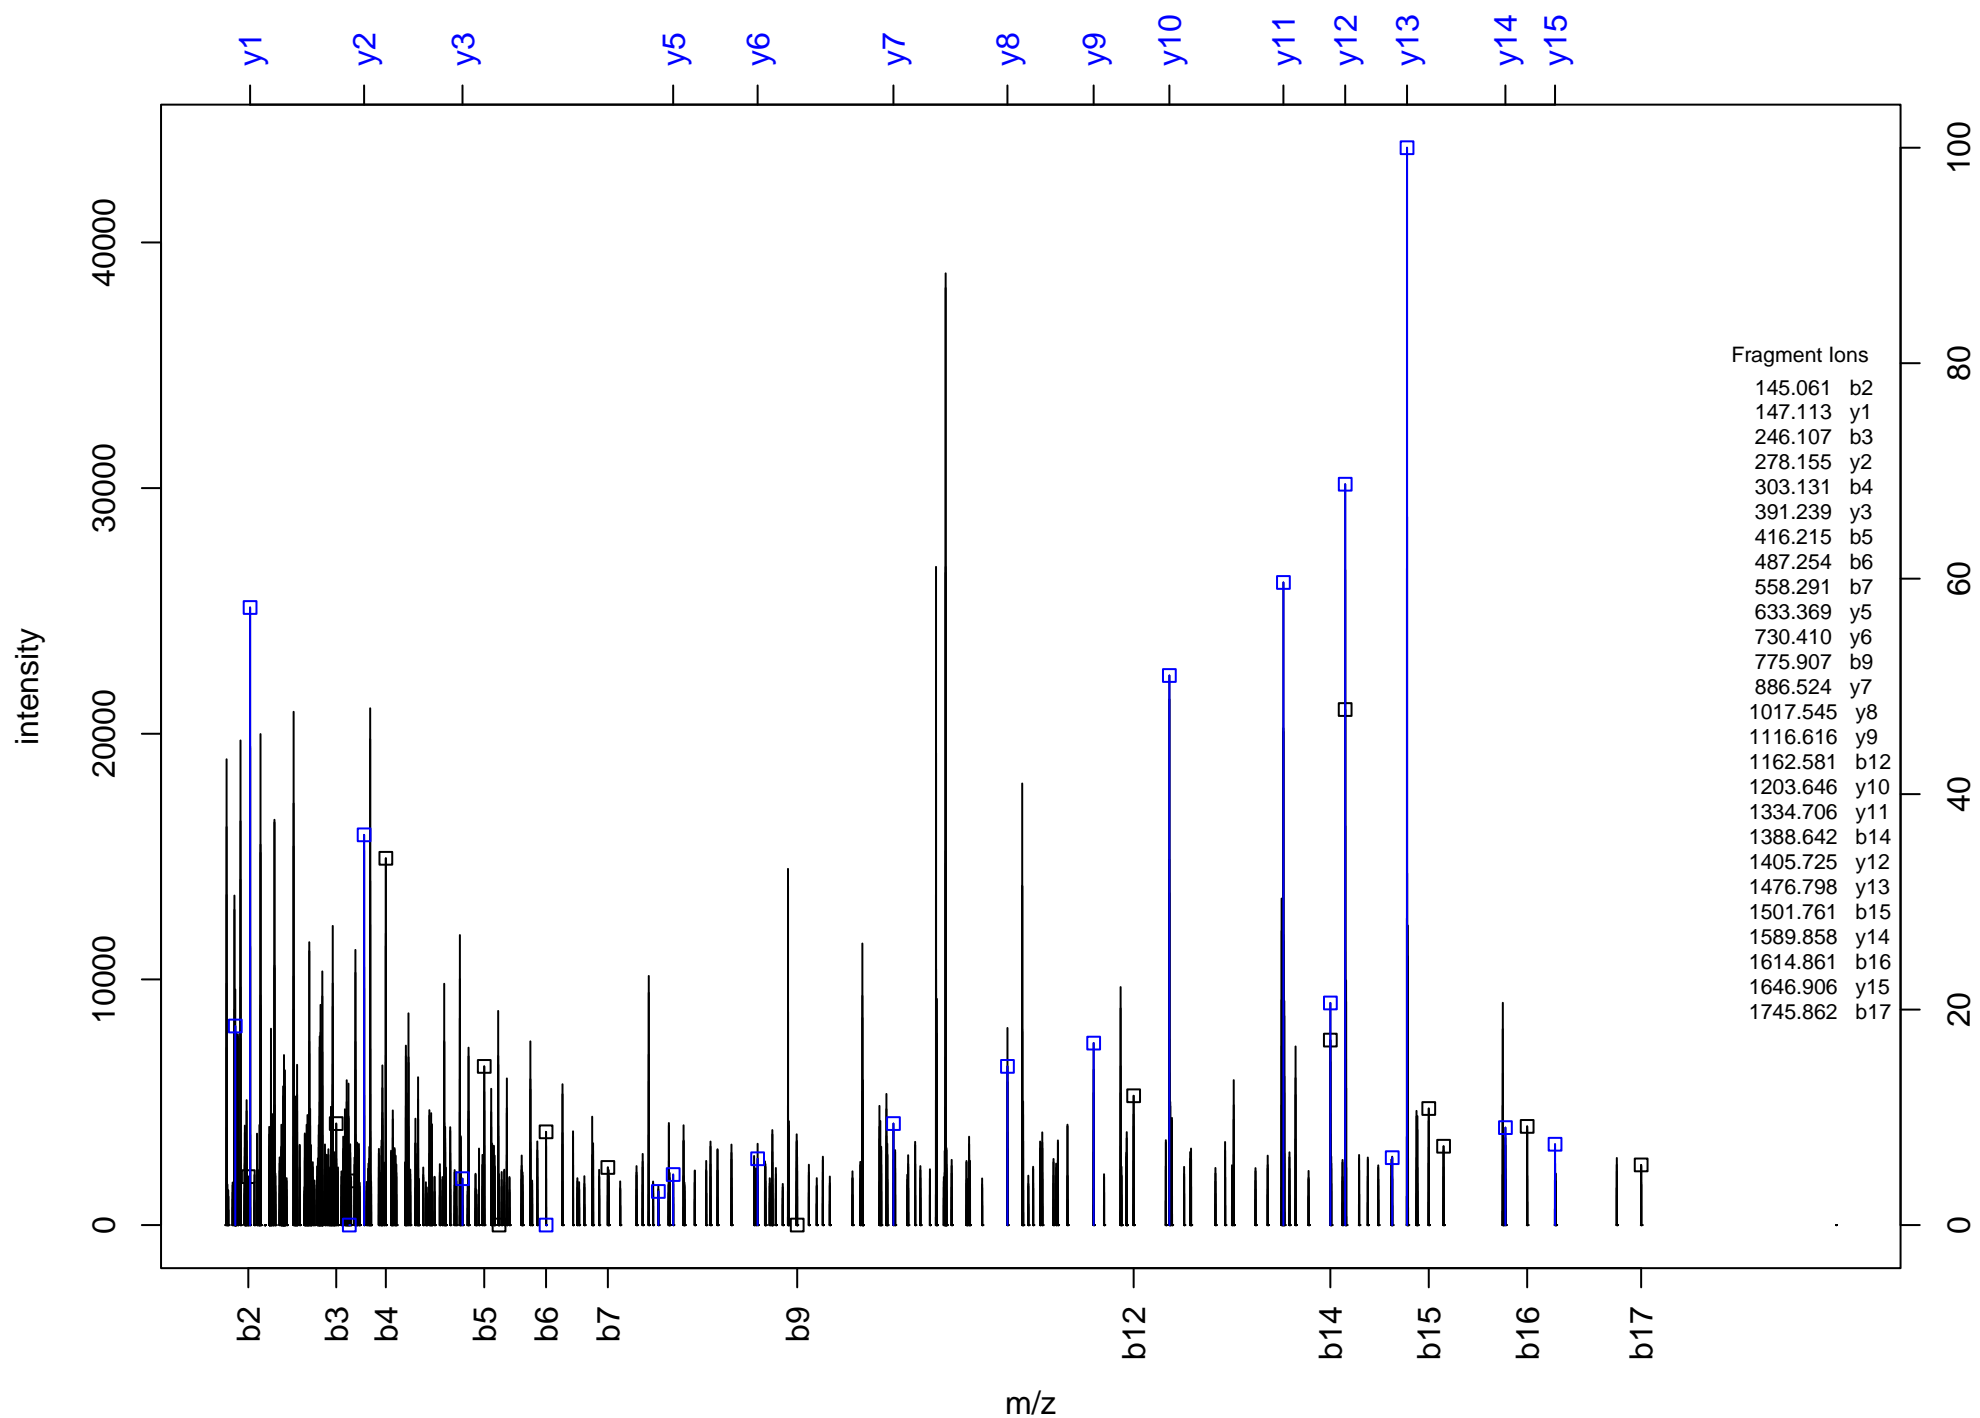

# QPFPN<sup>+</sup>IVQ<sup>+</sup>LGLCEPETSEVYR

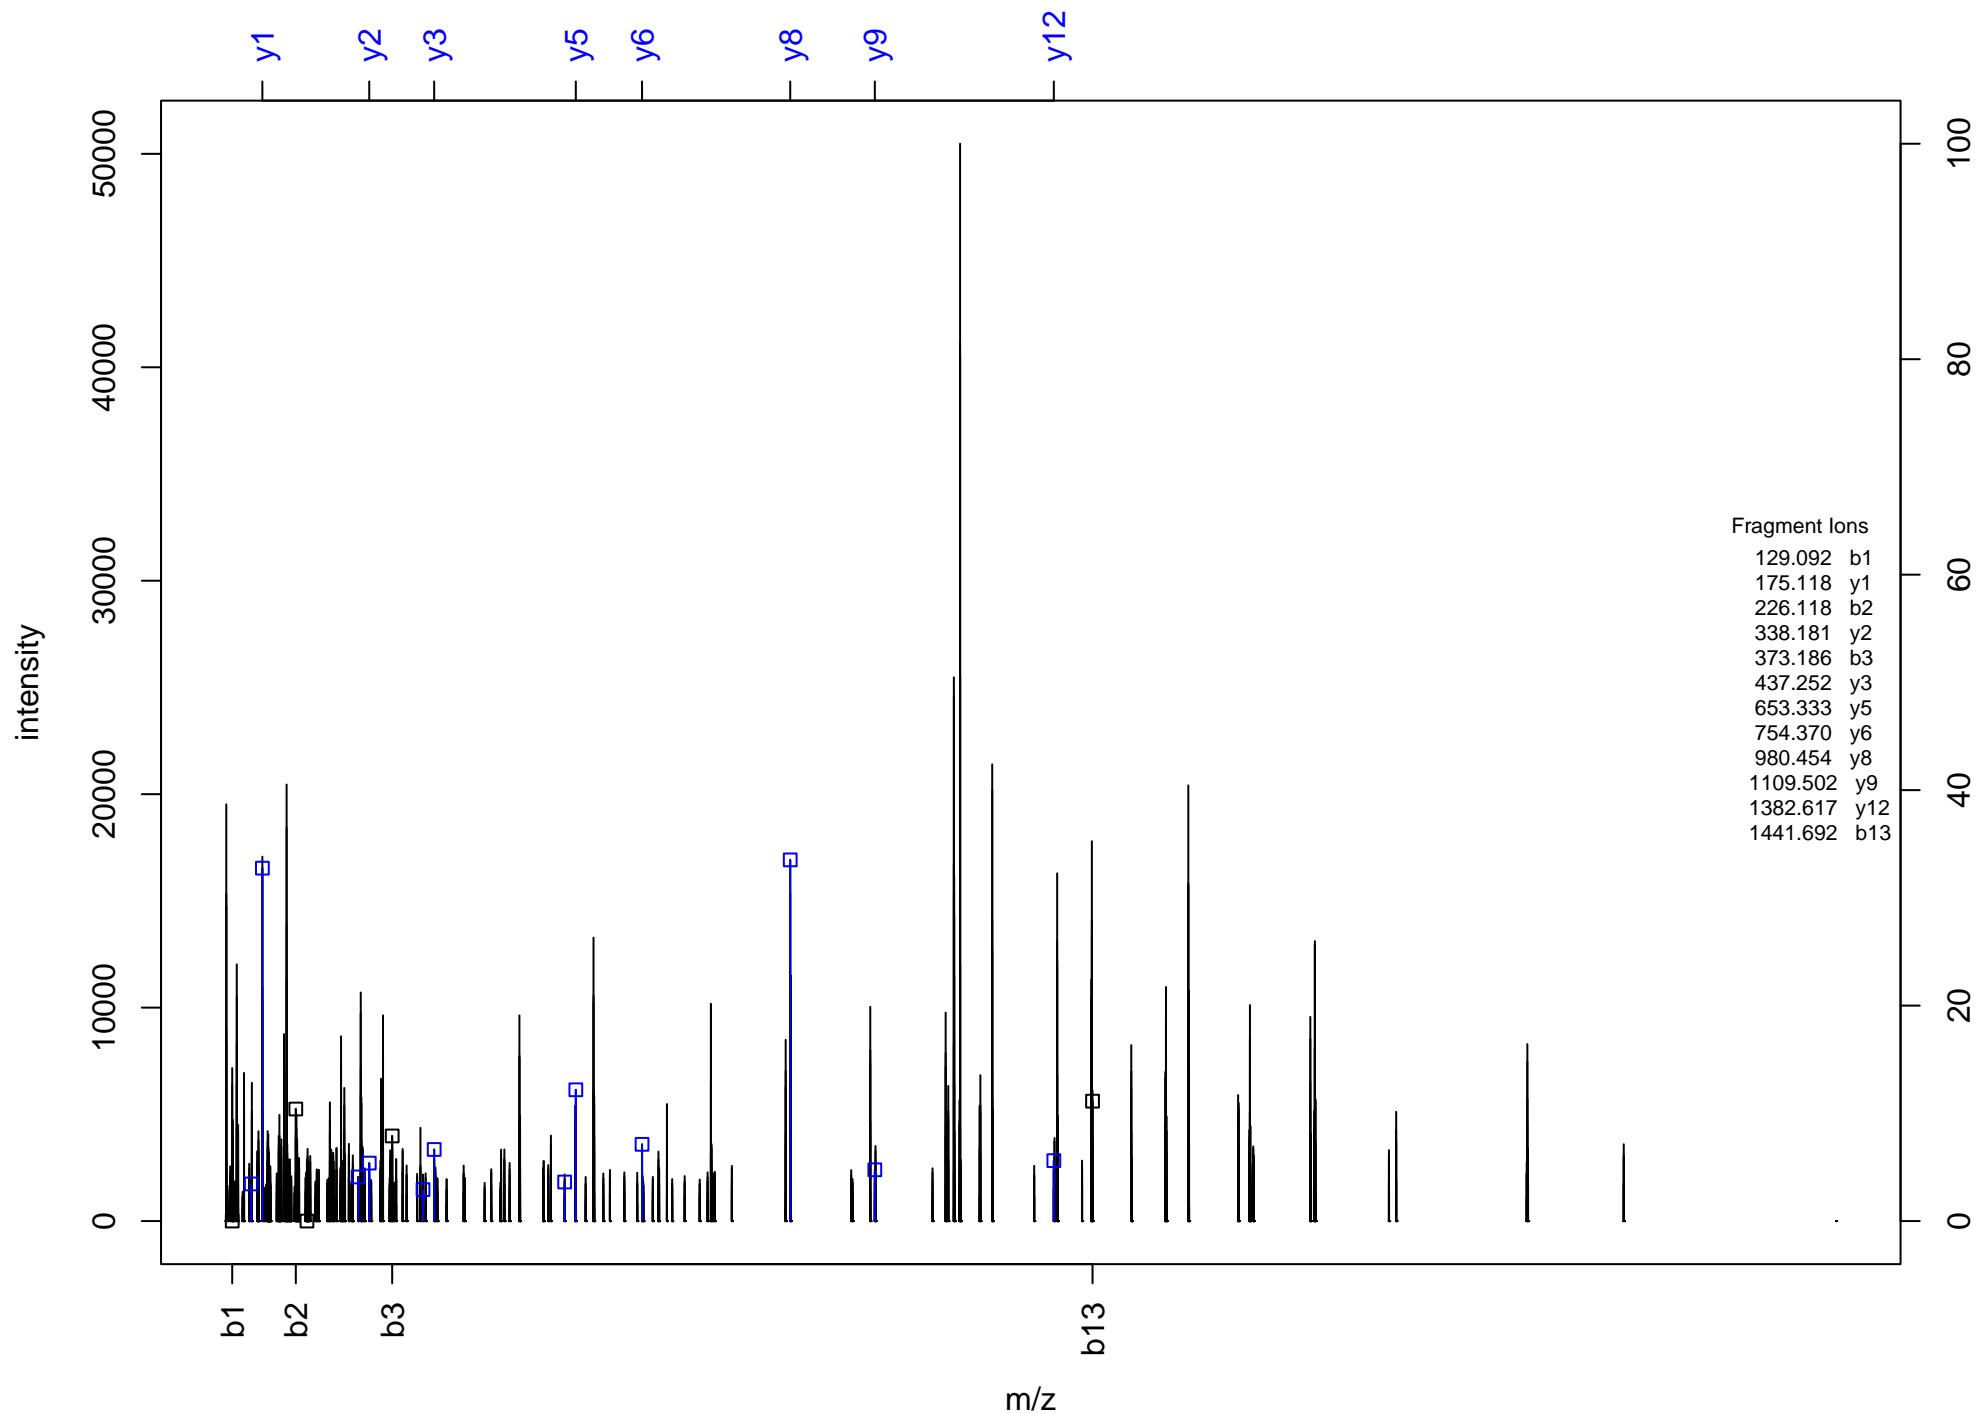

# IEIQLTLGLFK

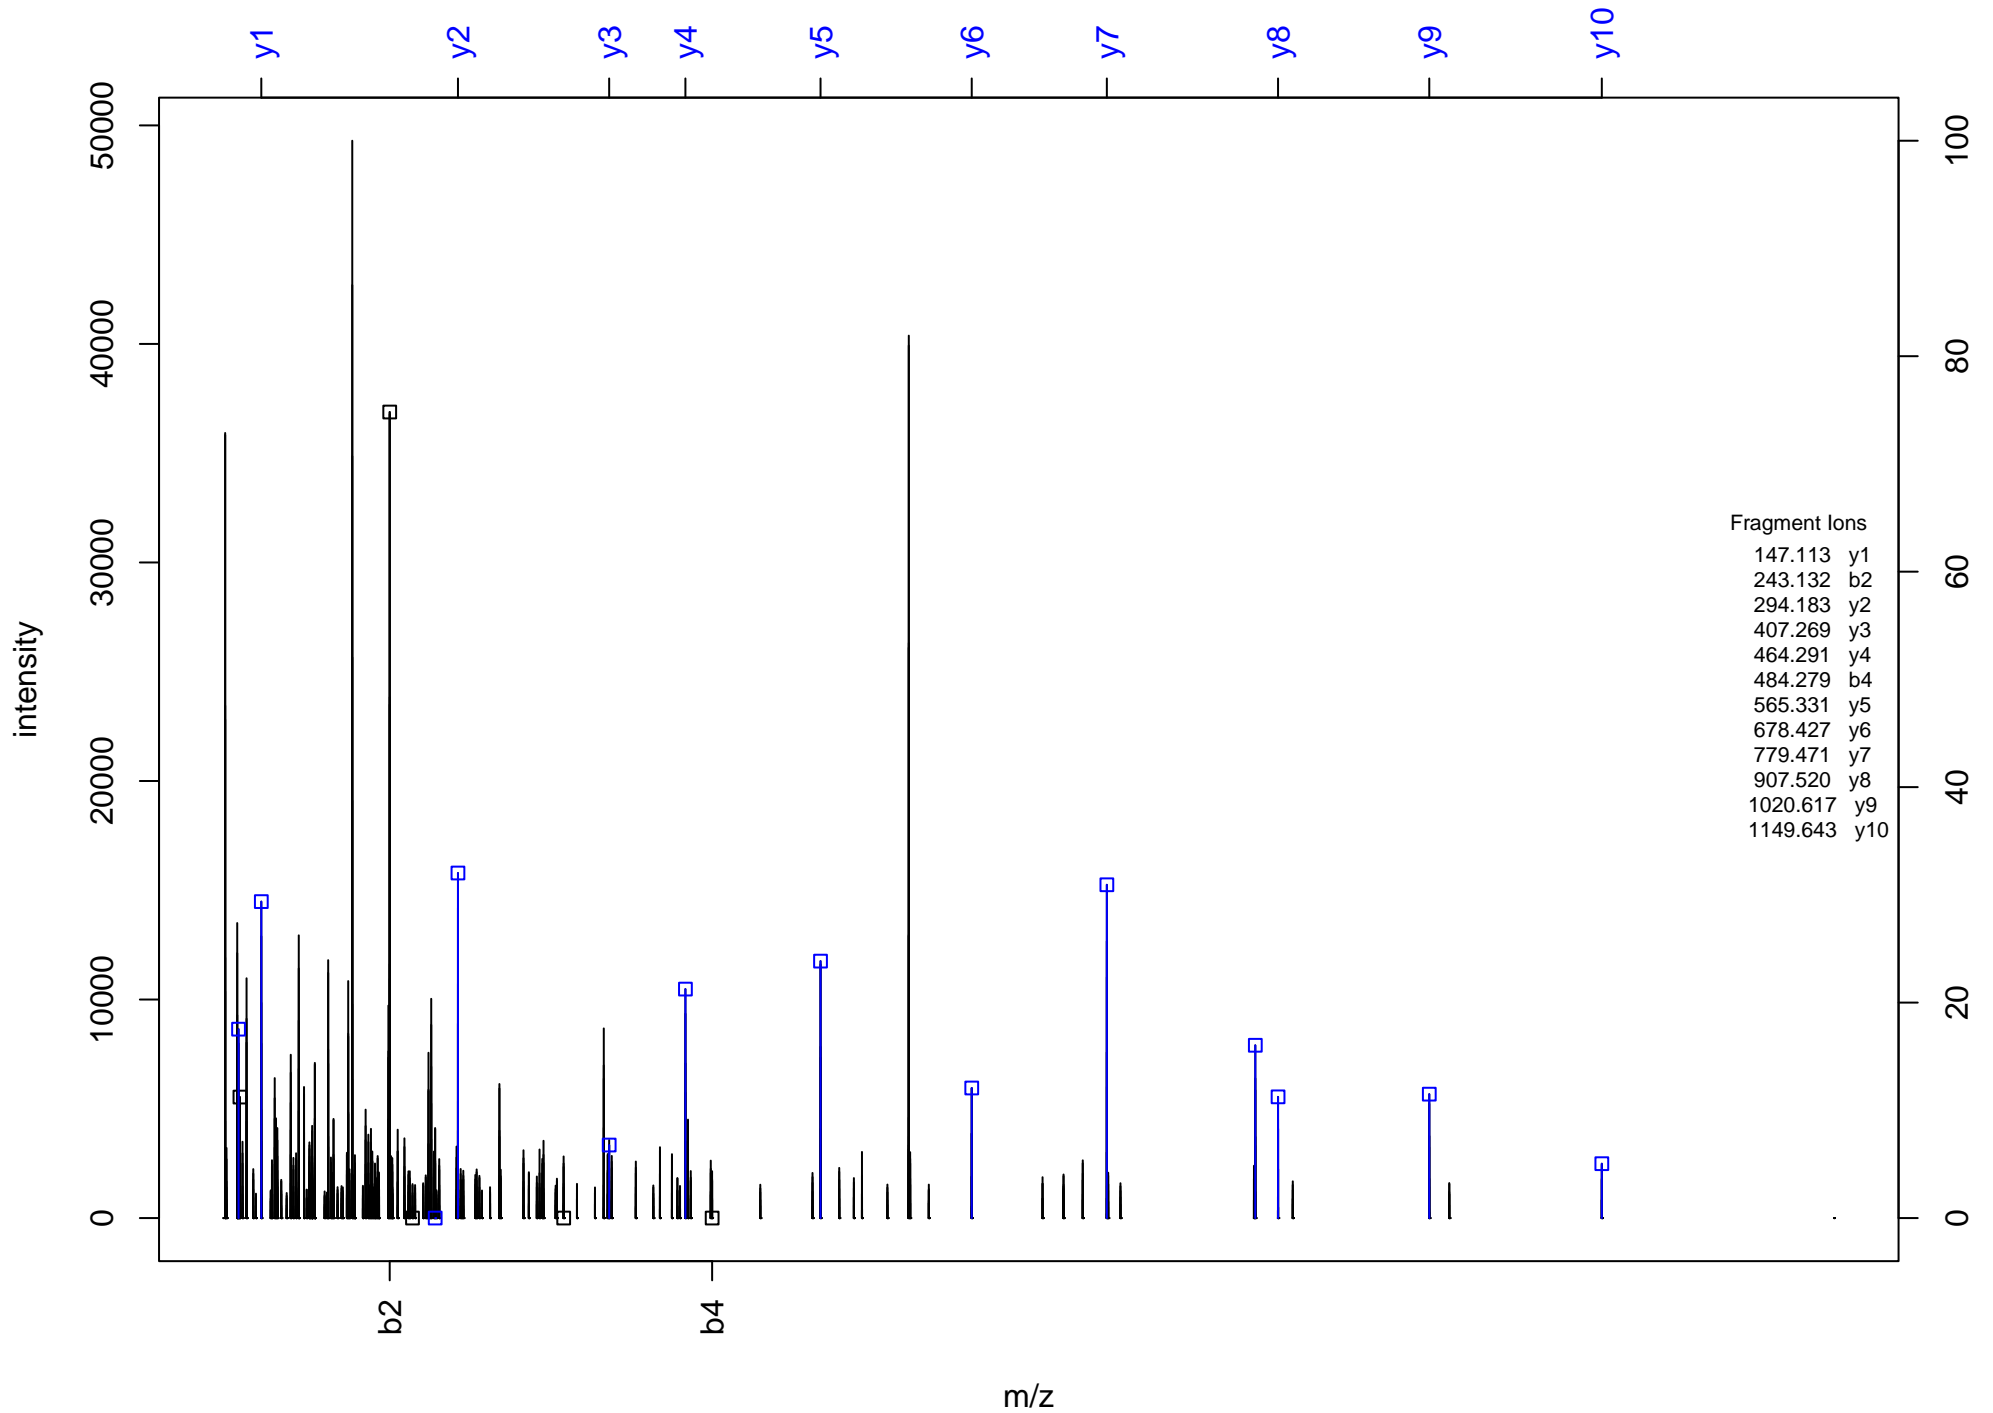

# FLNEQDLDELVN^R

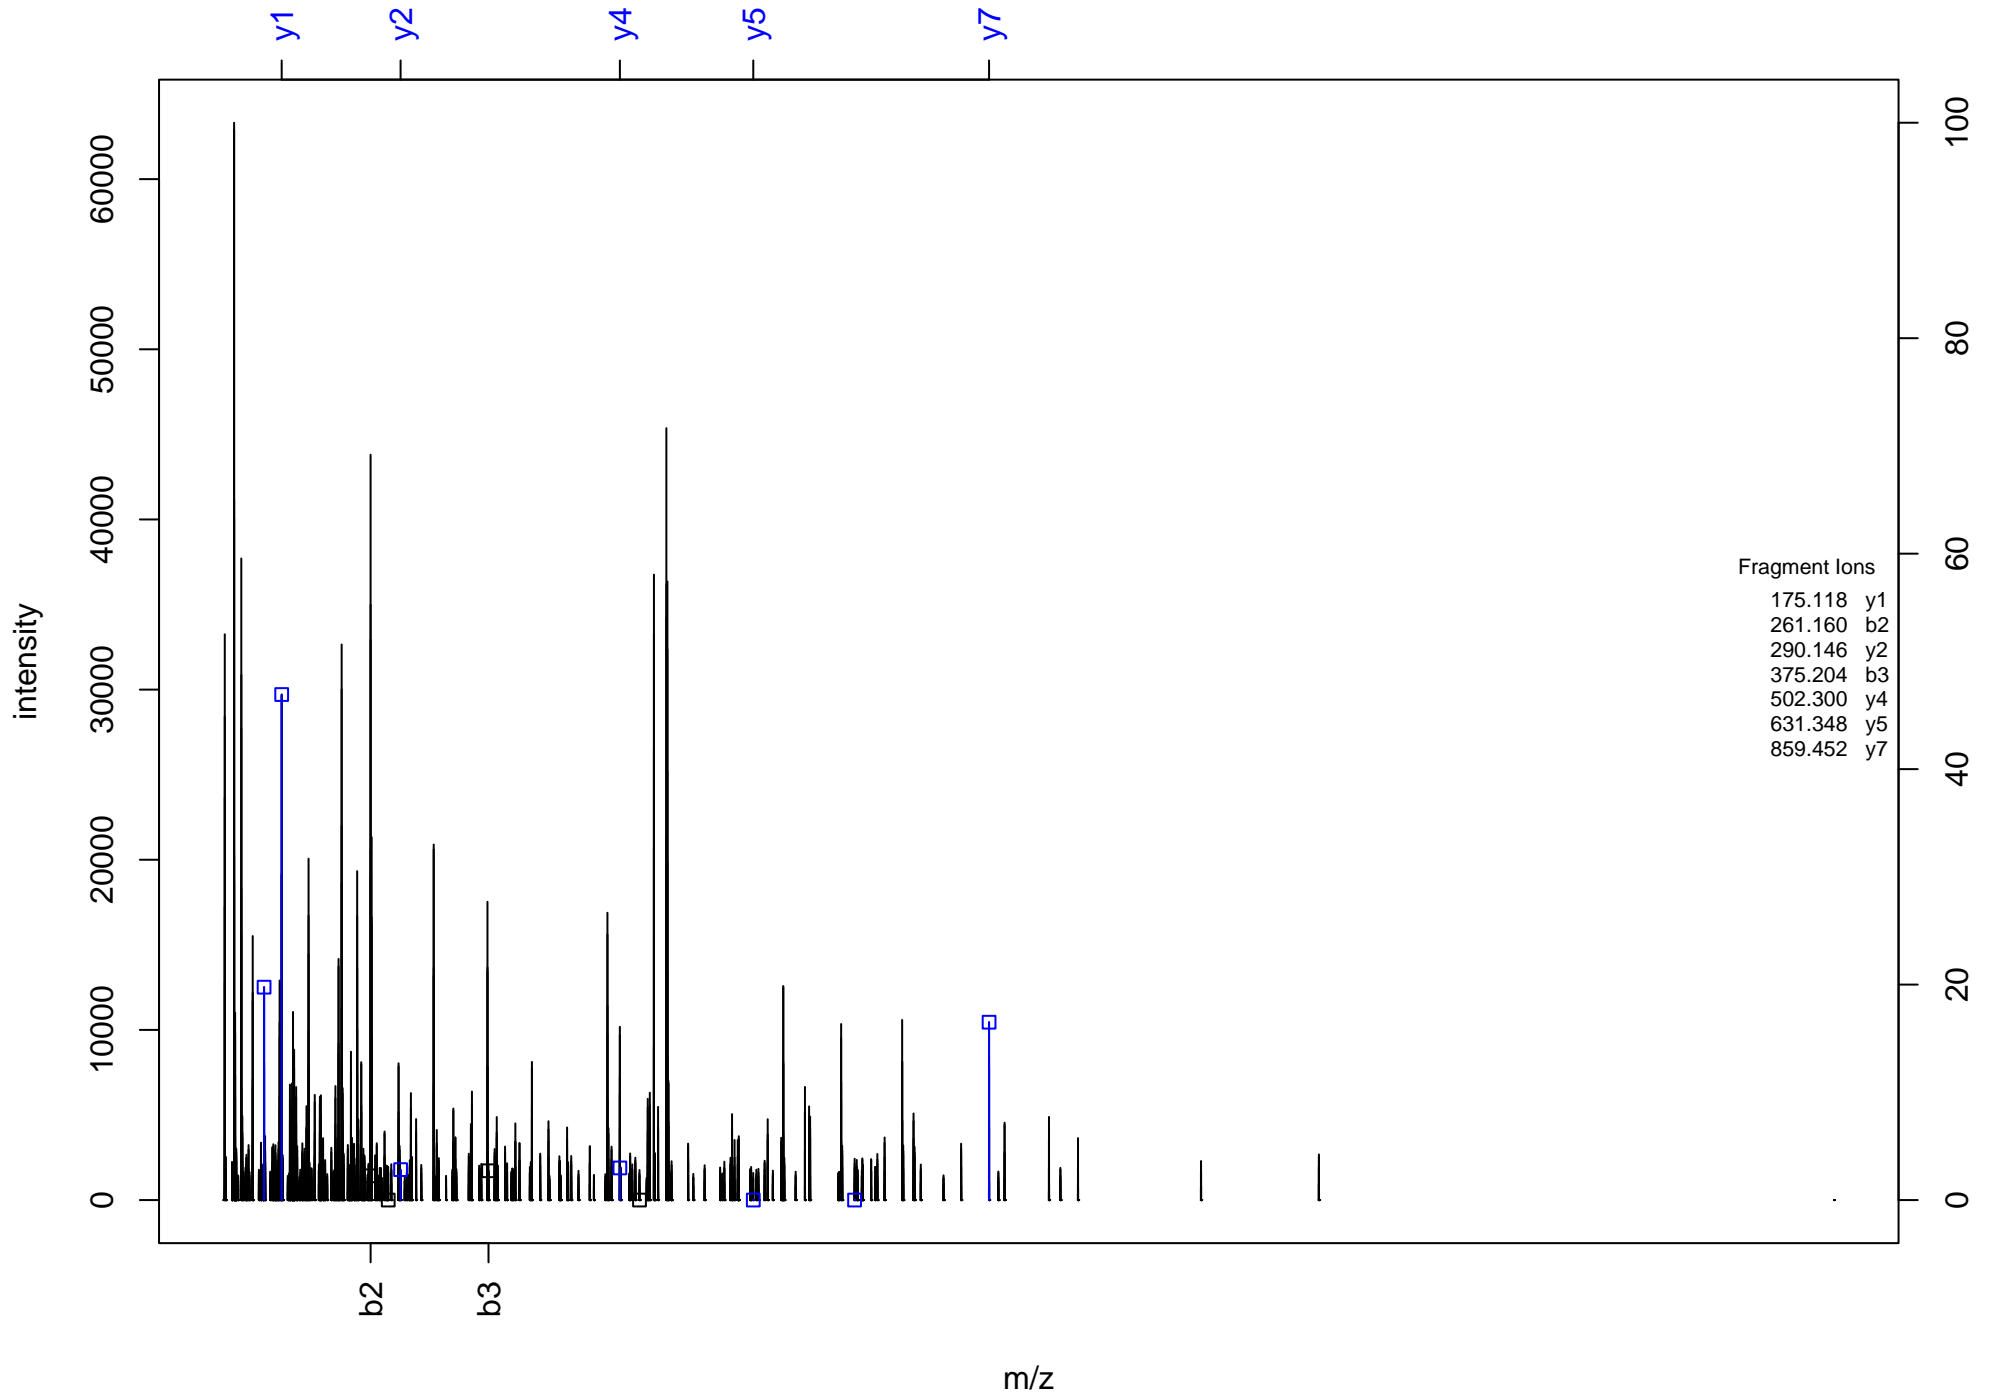

# VAGFNPALQLILSR

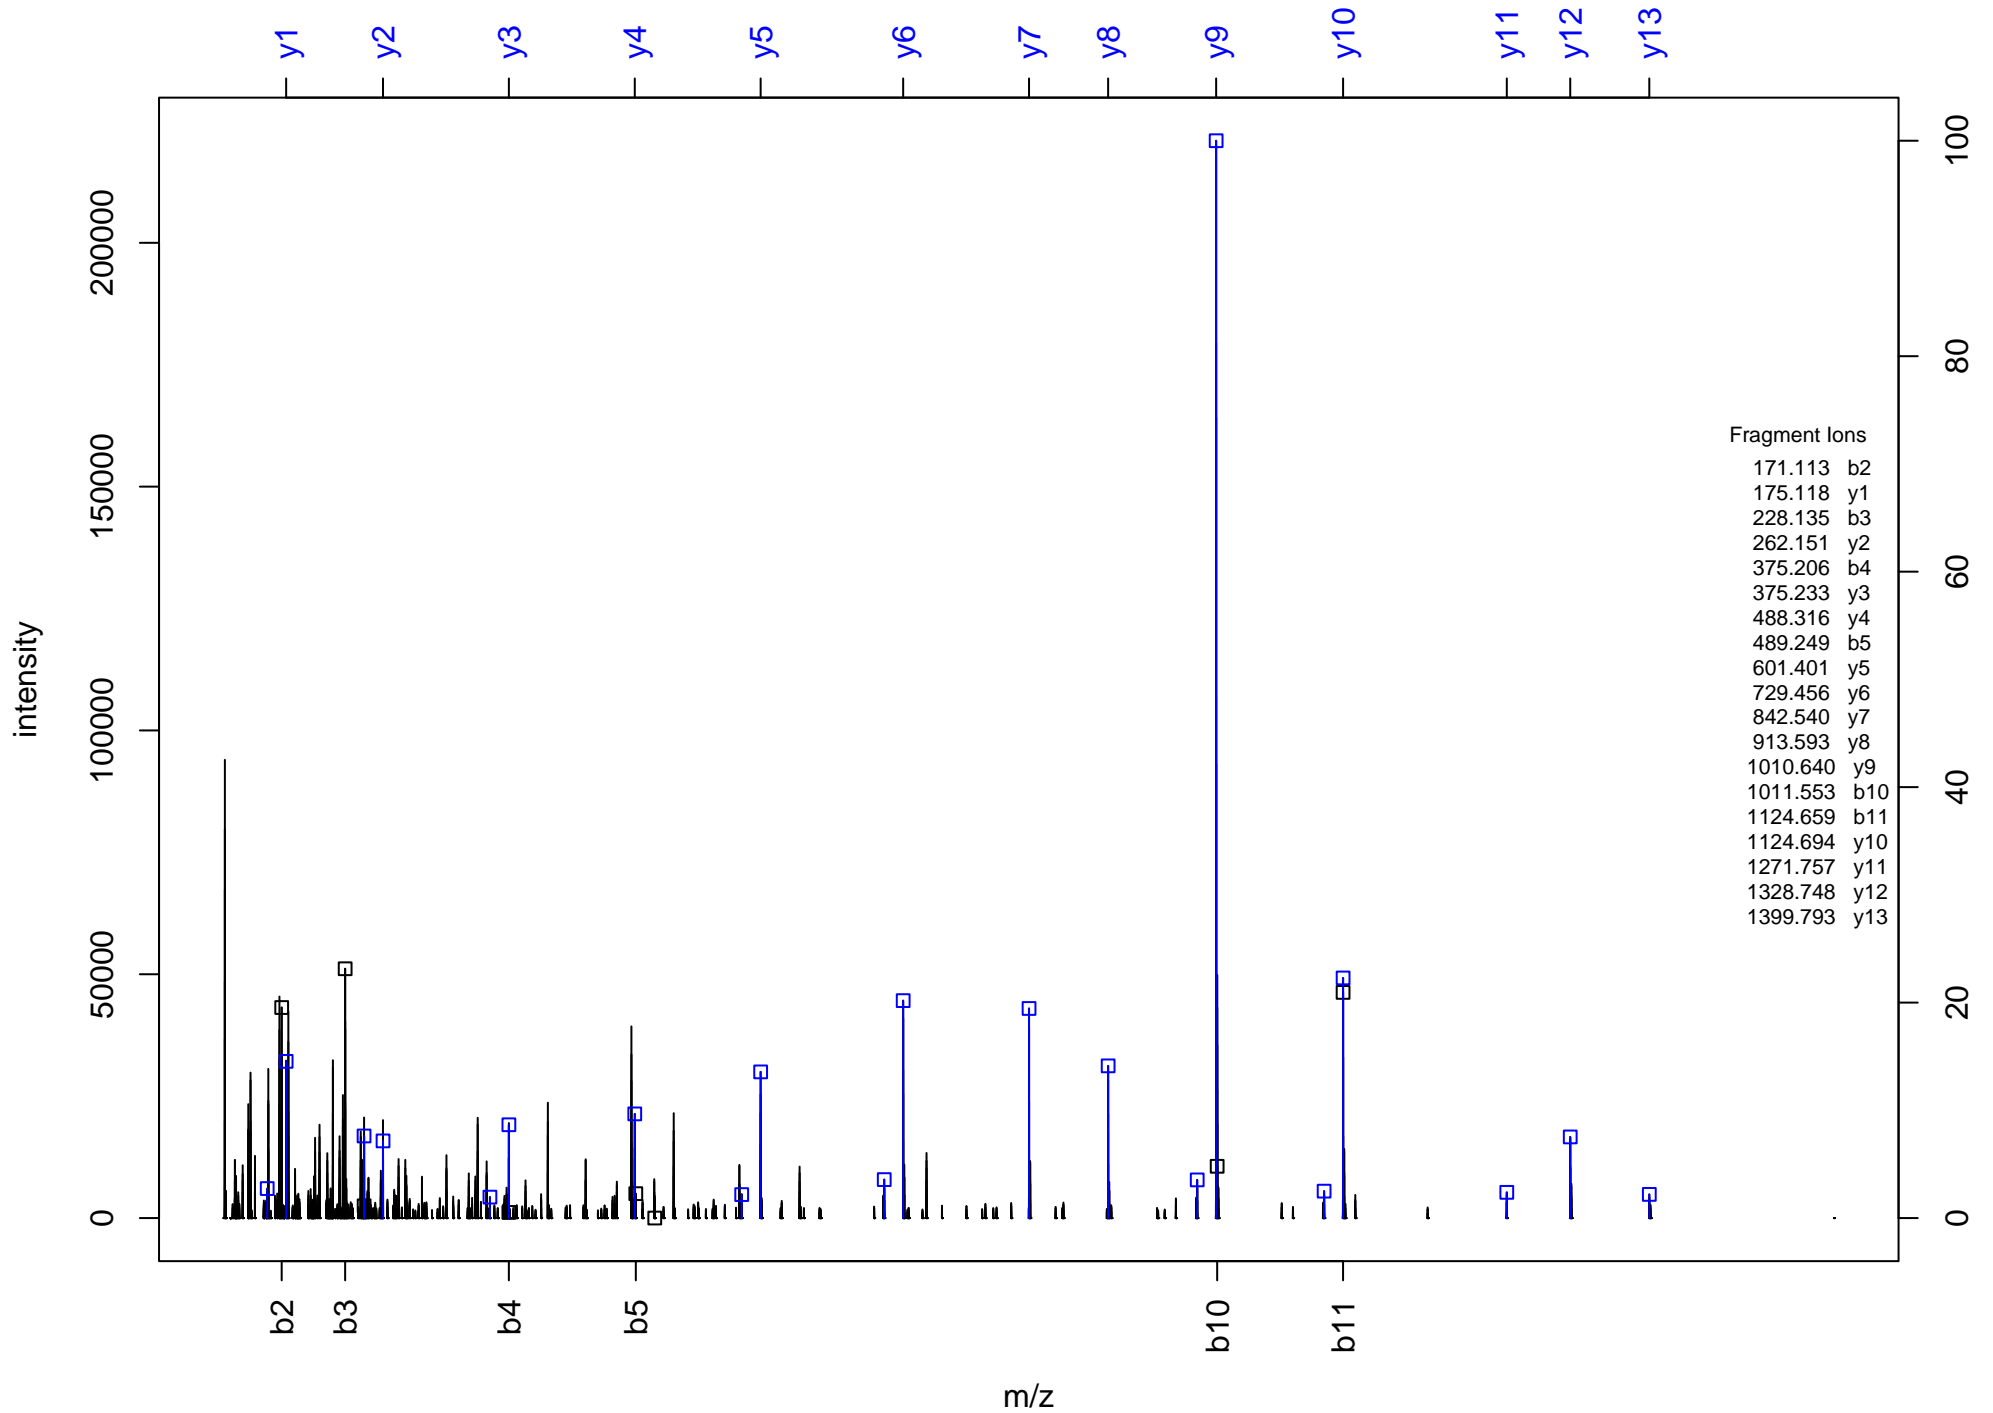

# GANSSSGNPLVYLDVGADGQPLGR

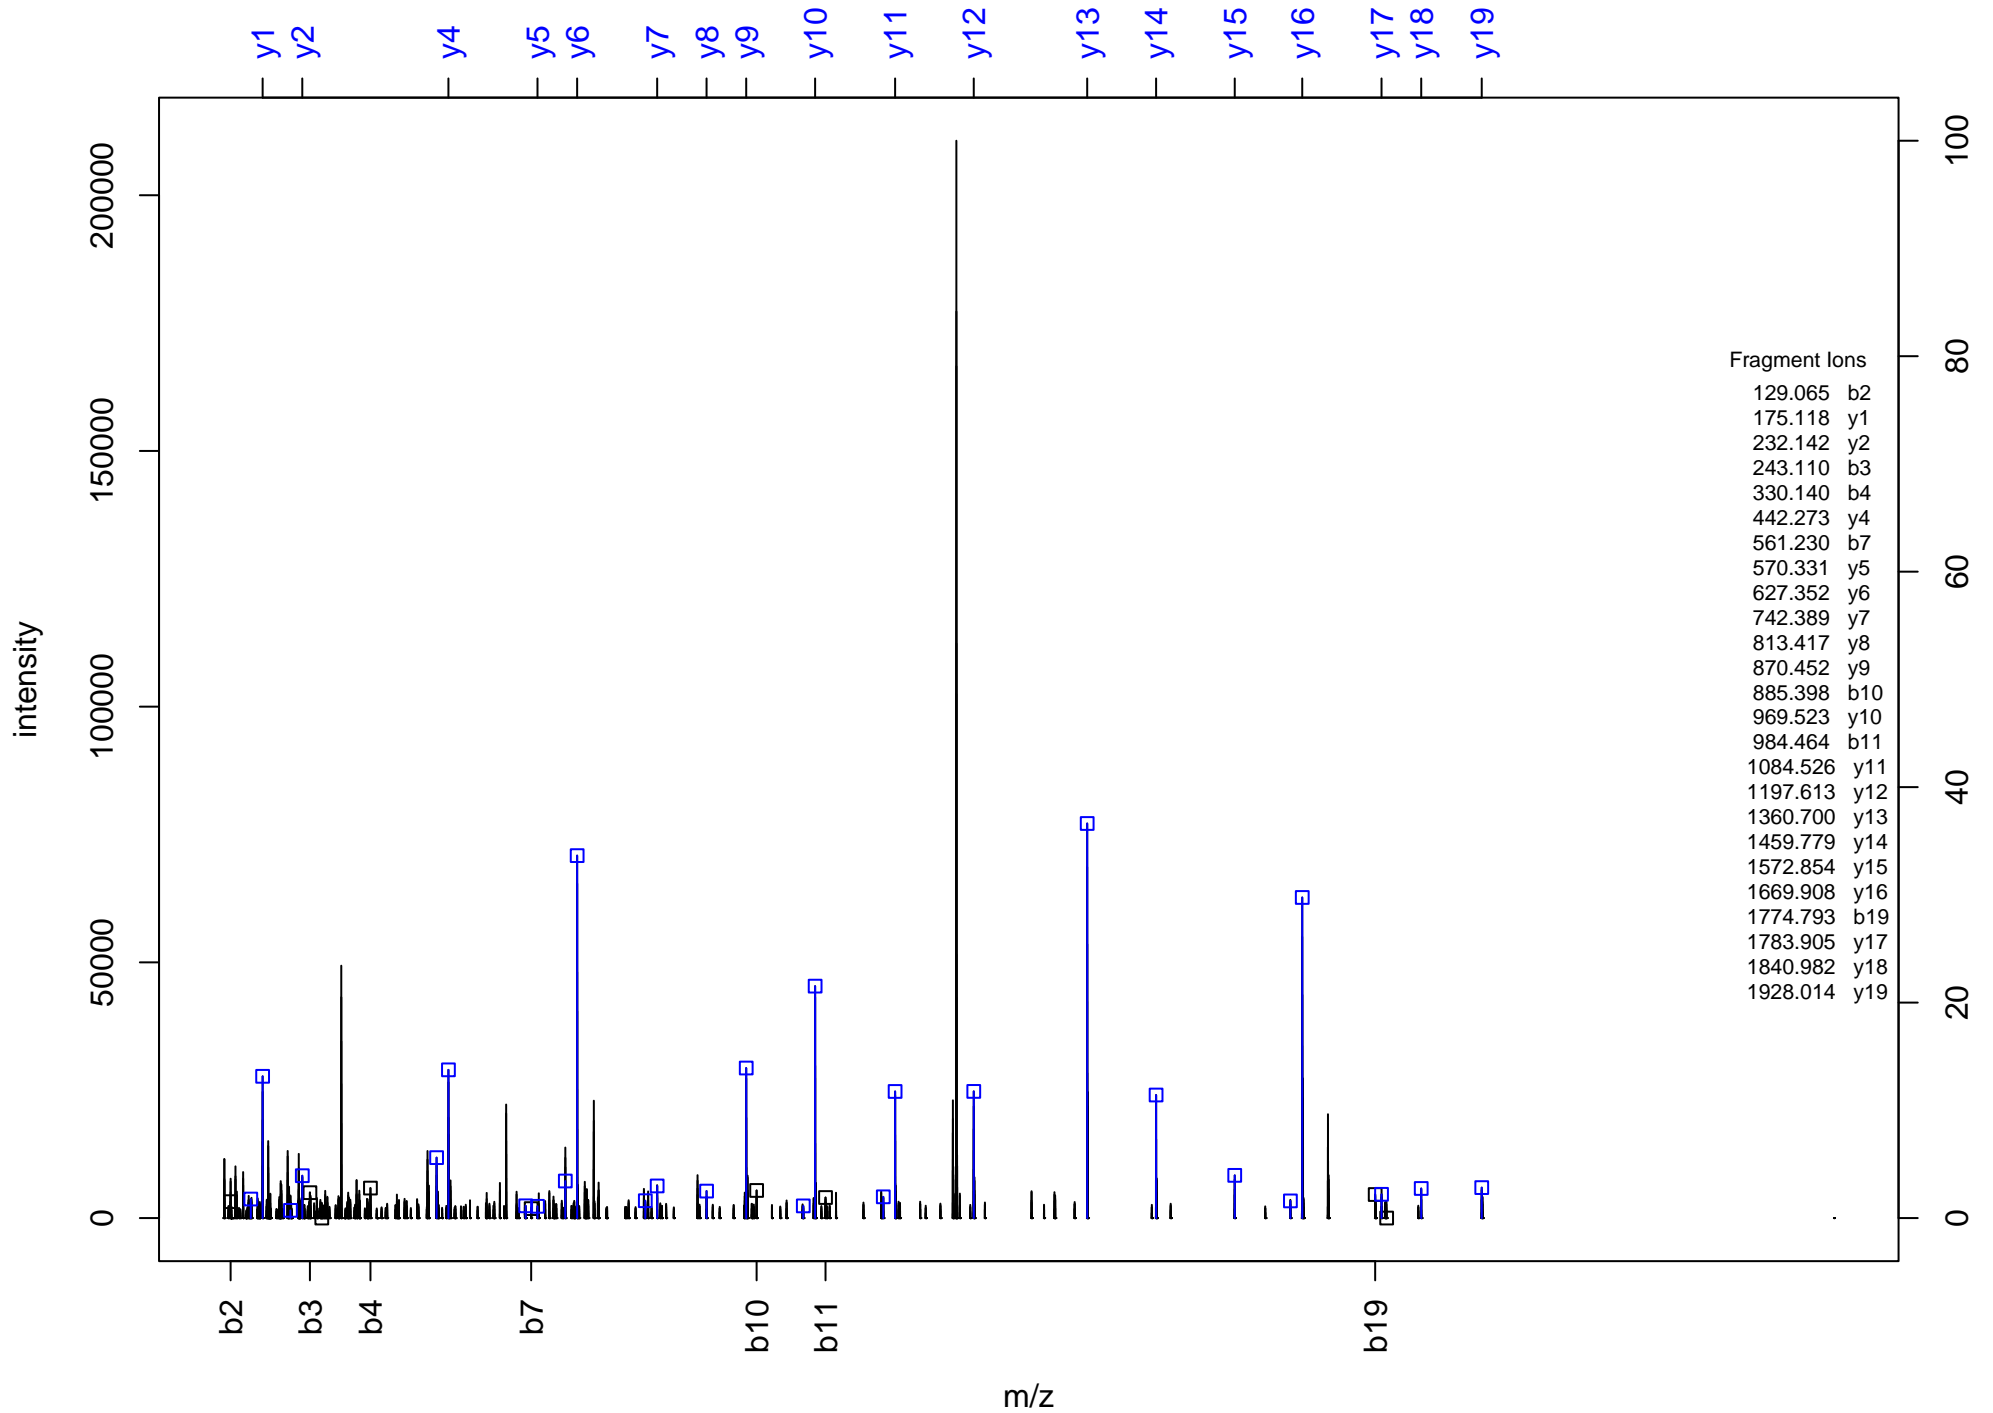



# DDILPMDLGTFYR

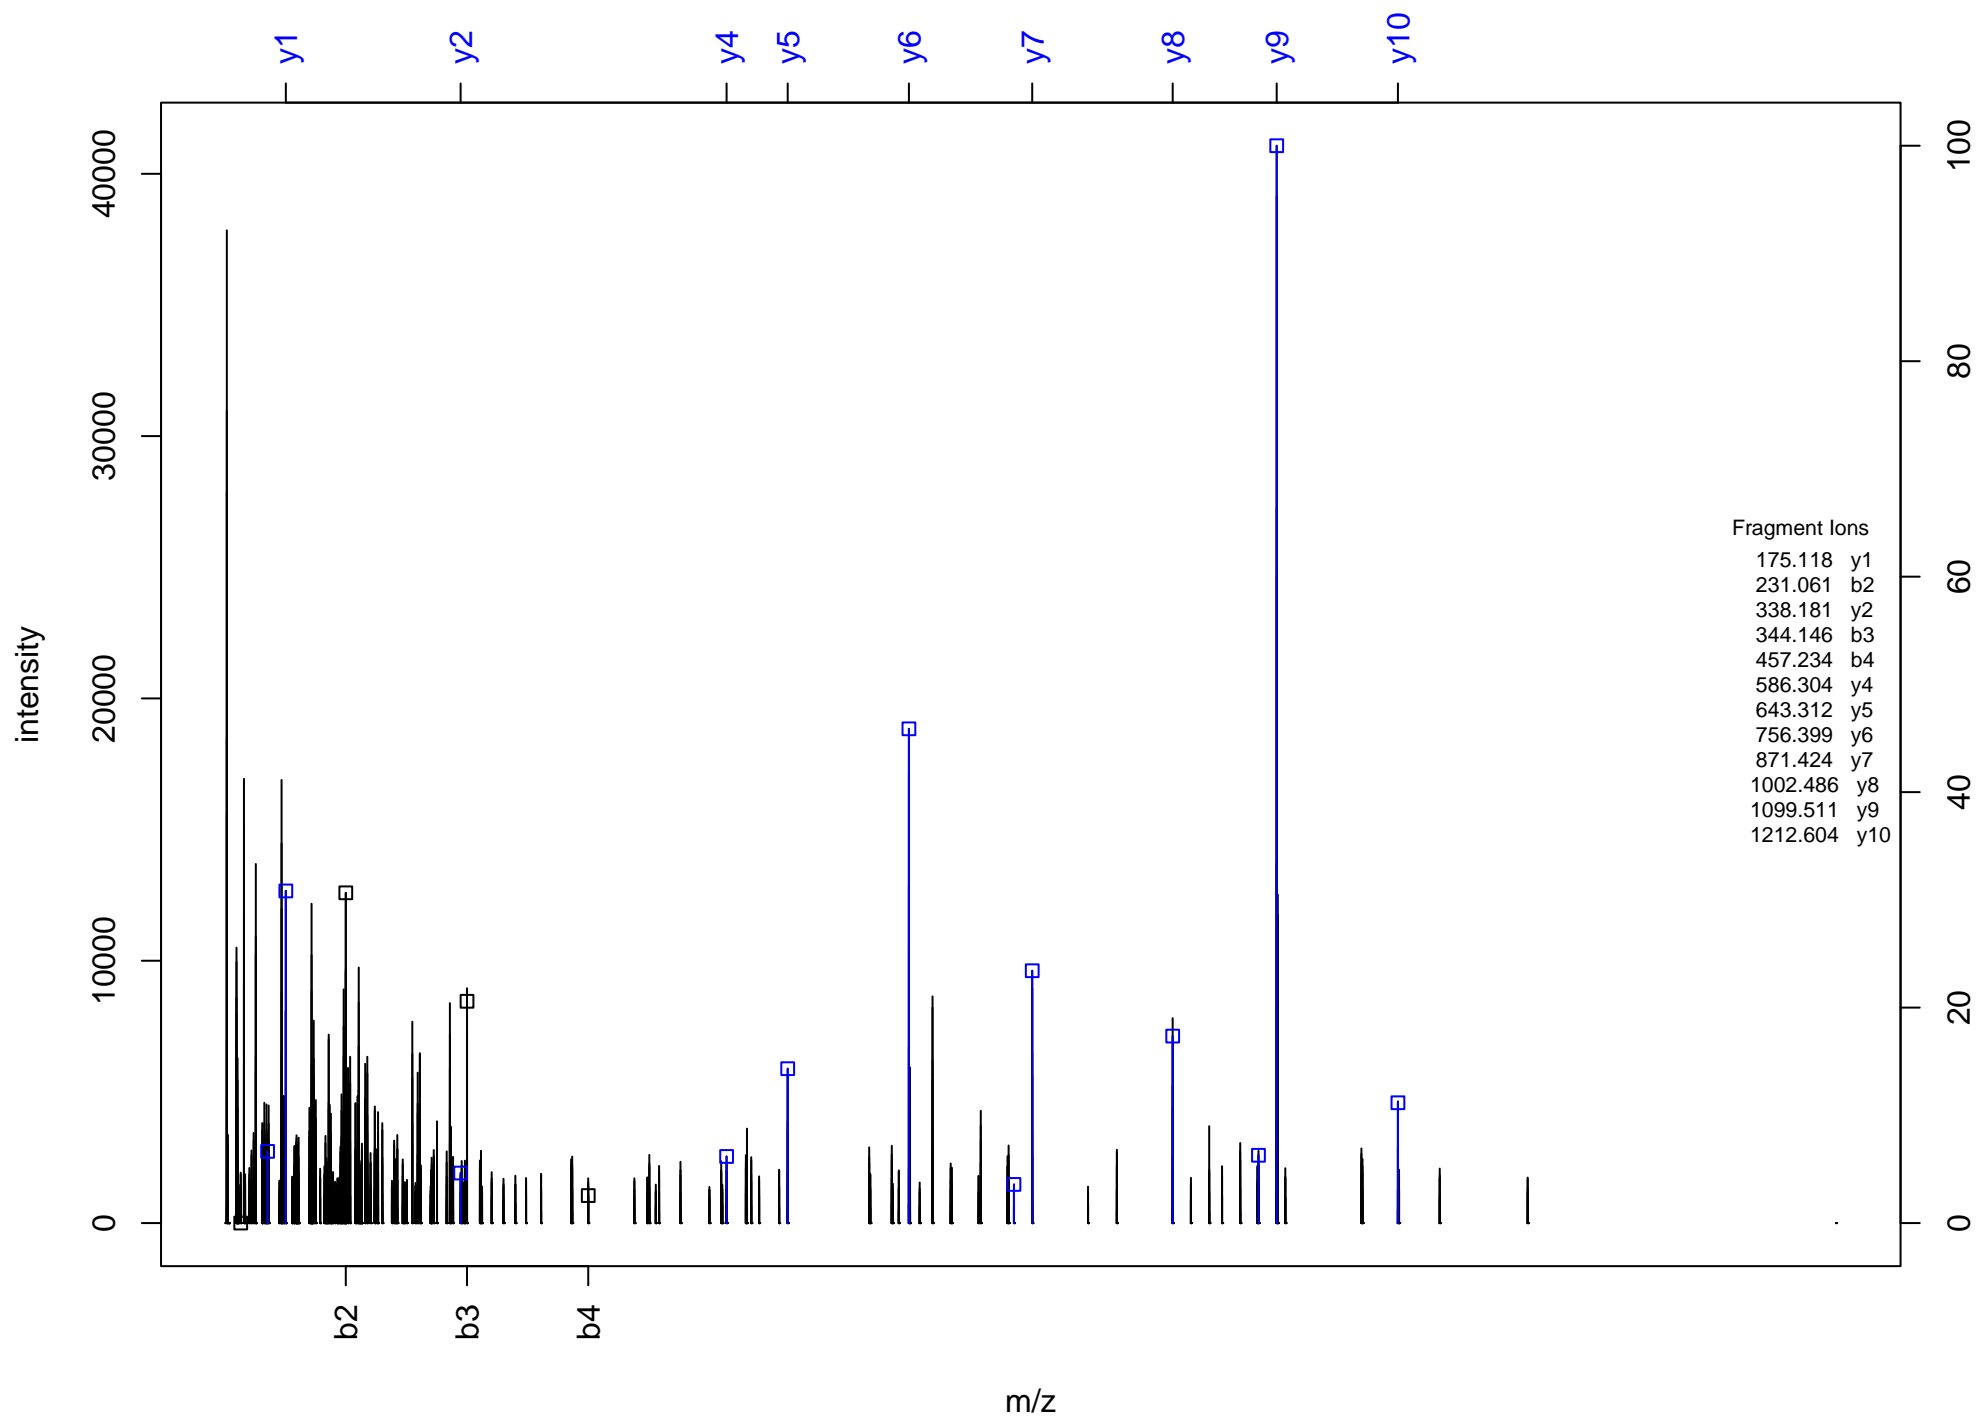

# DWYSILGADPSANMSDLK

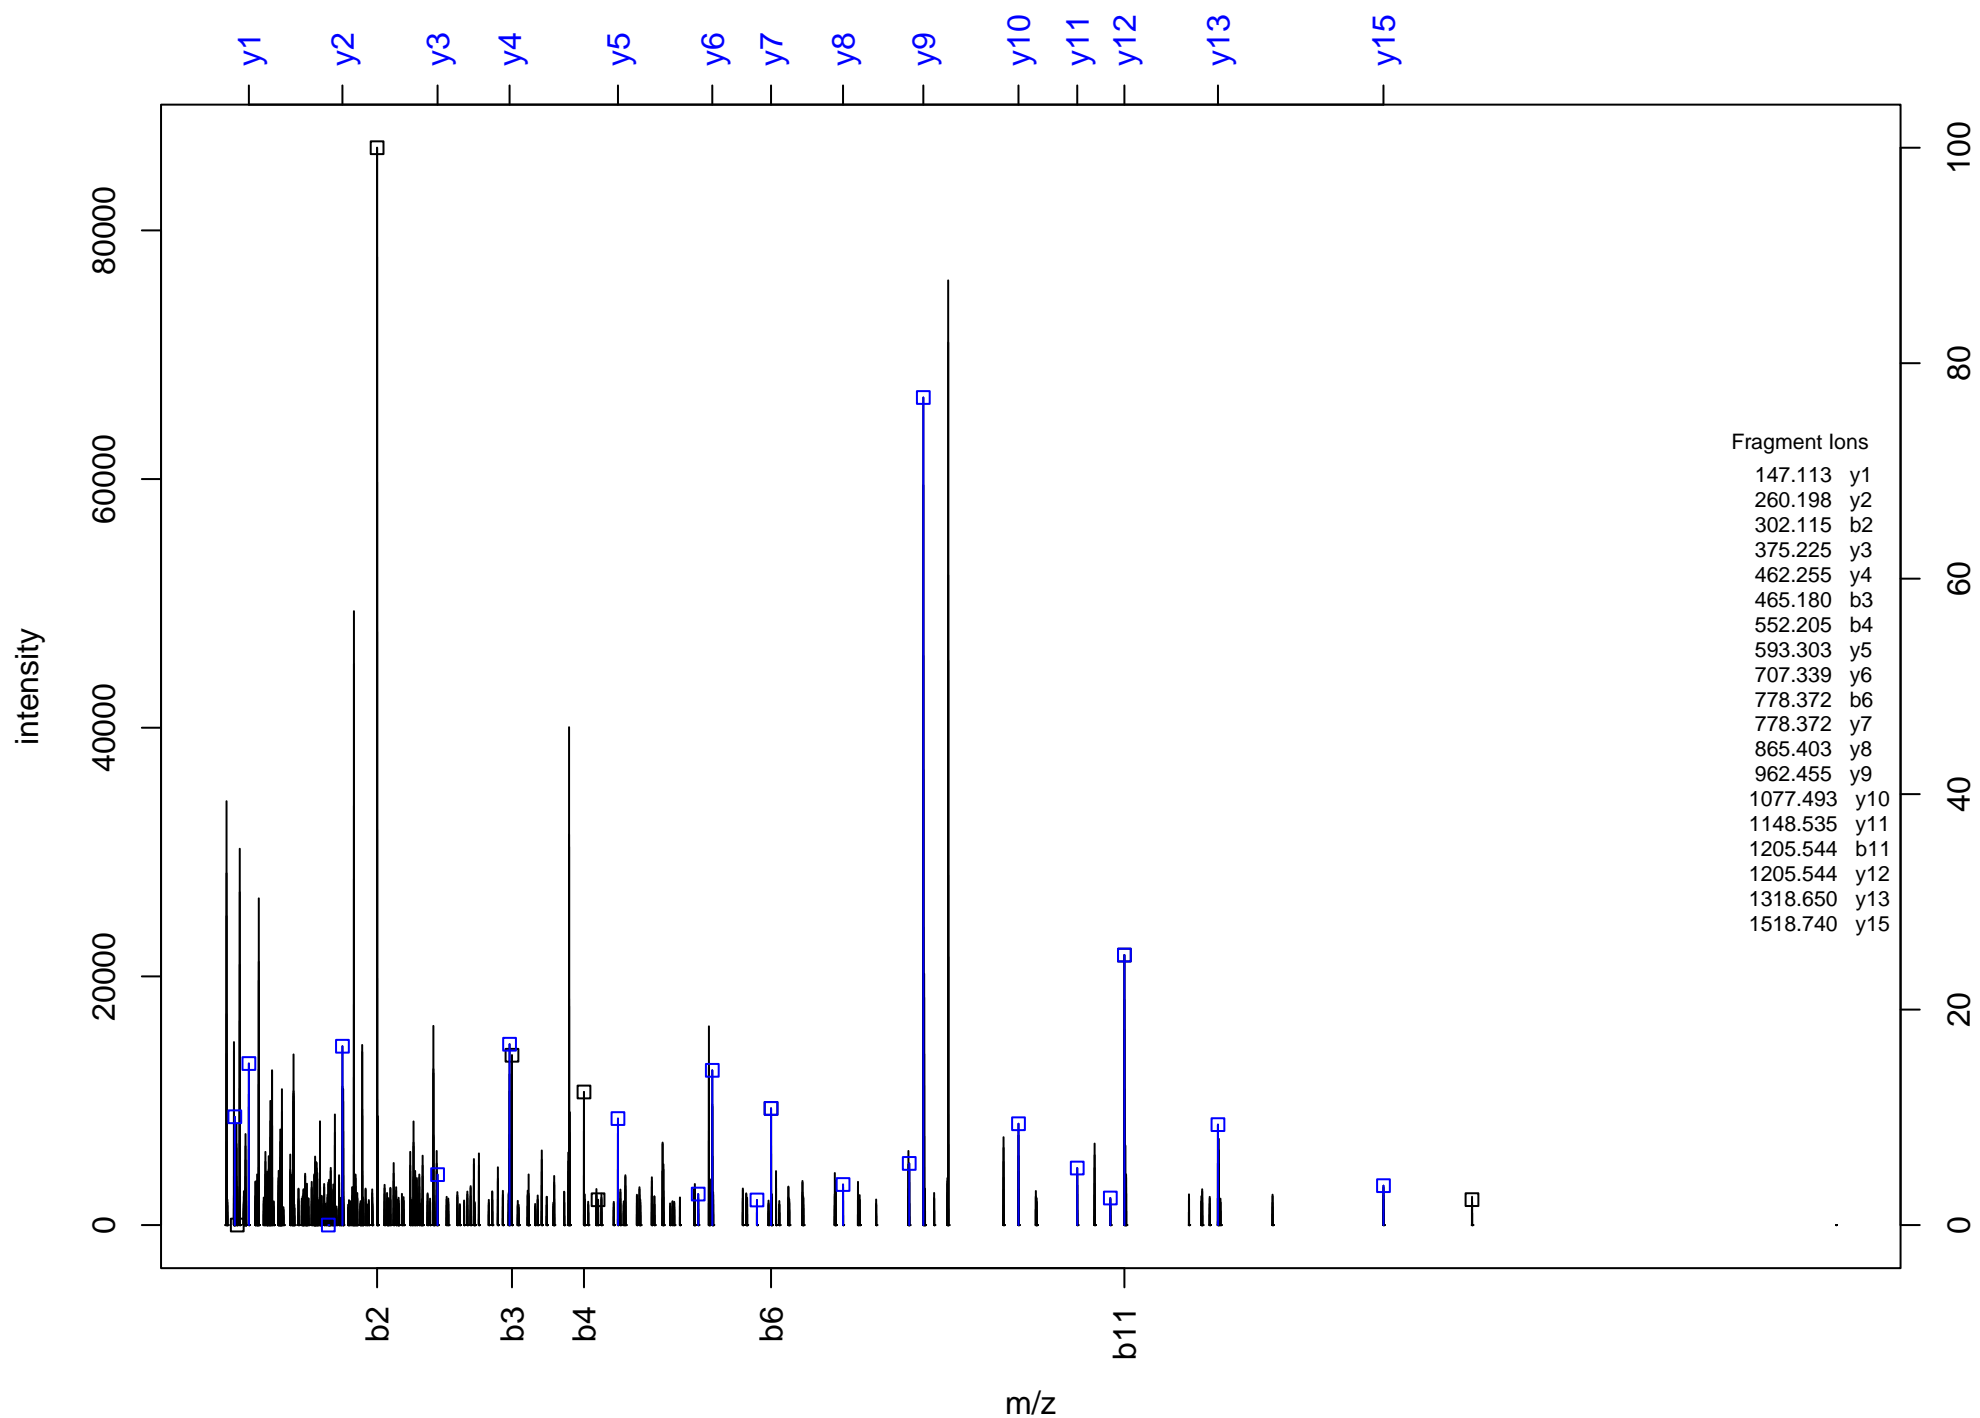

# ADSEYPTWLFQVNLGPPK

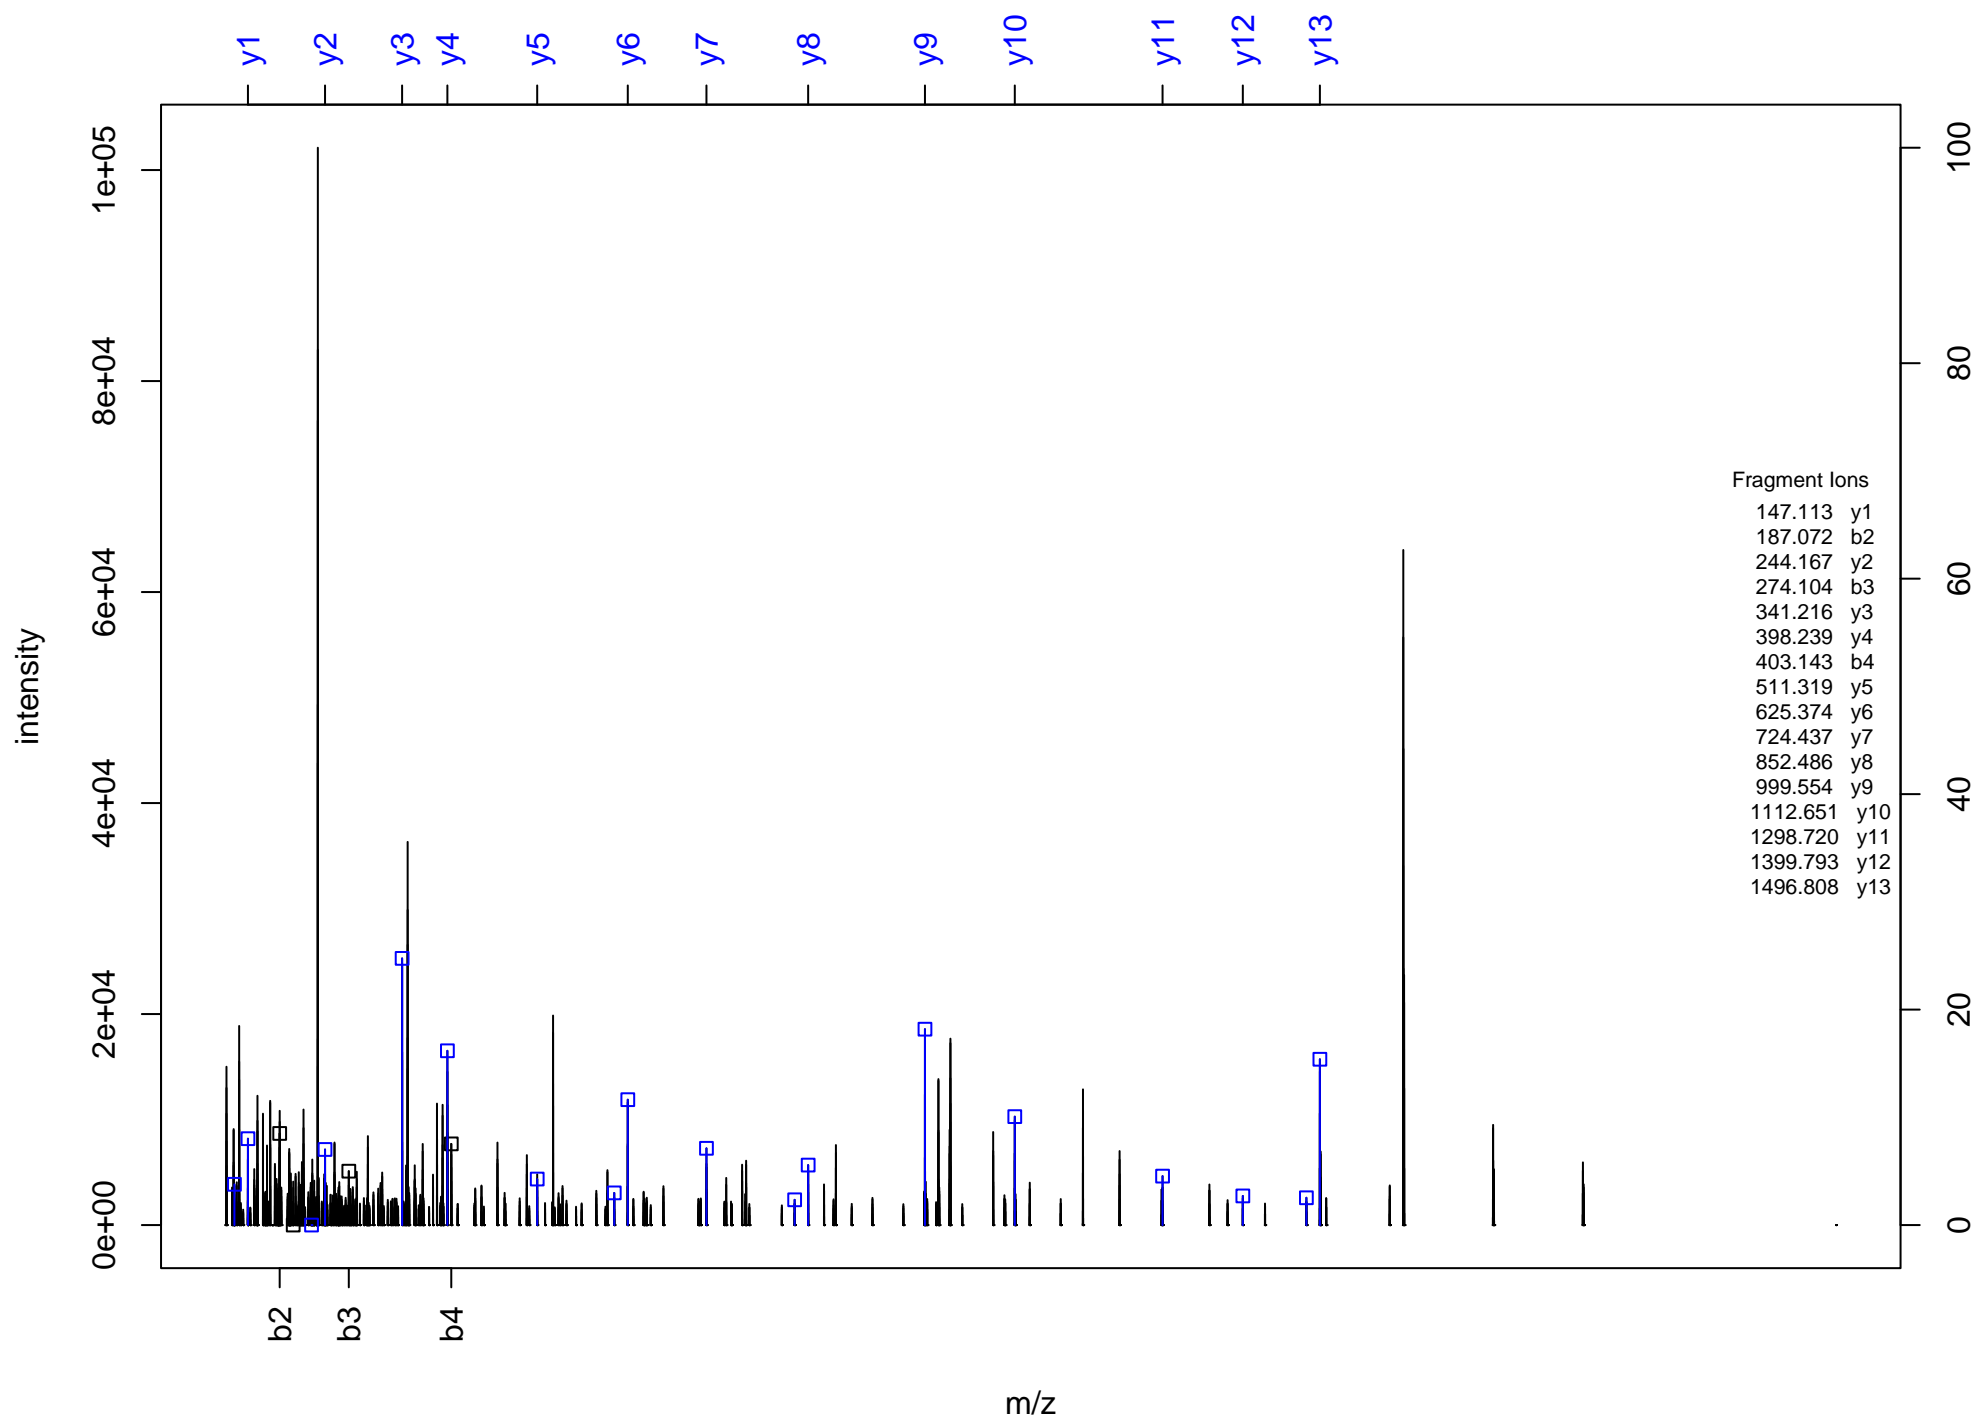

# FQNCTDLFDLILTCEER

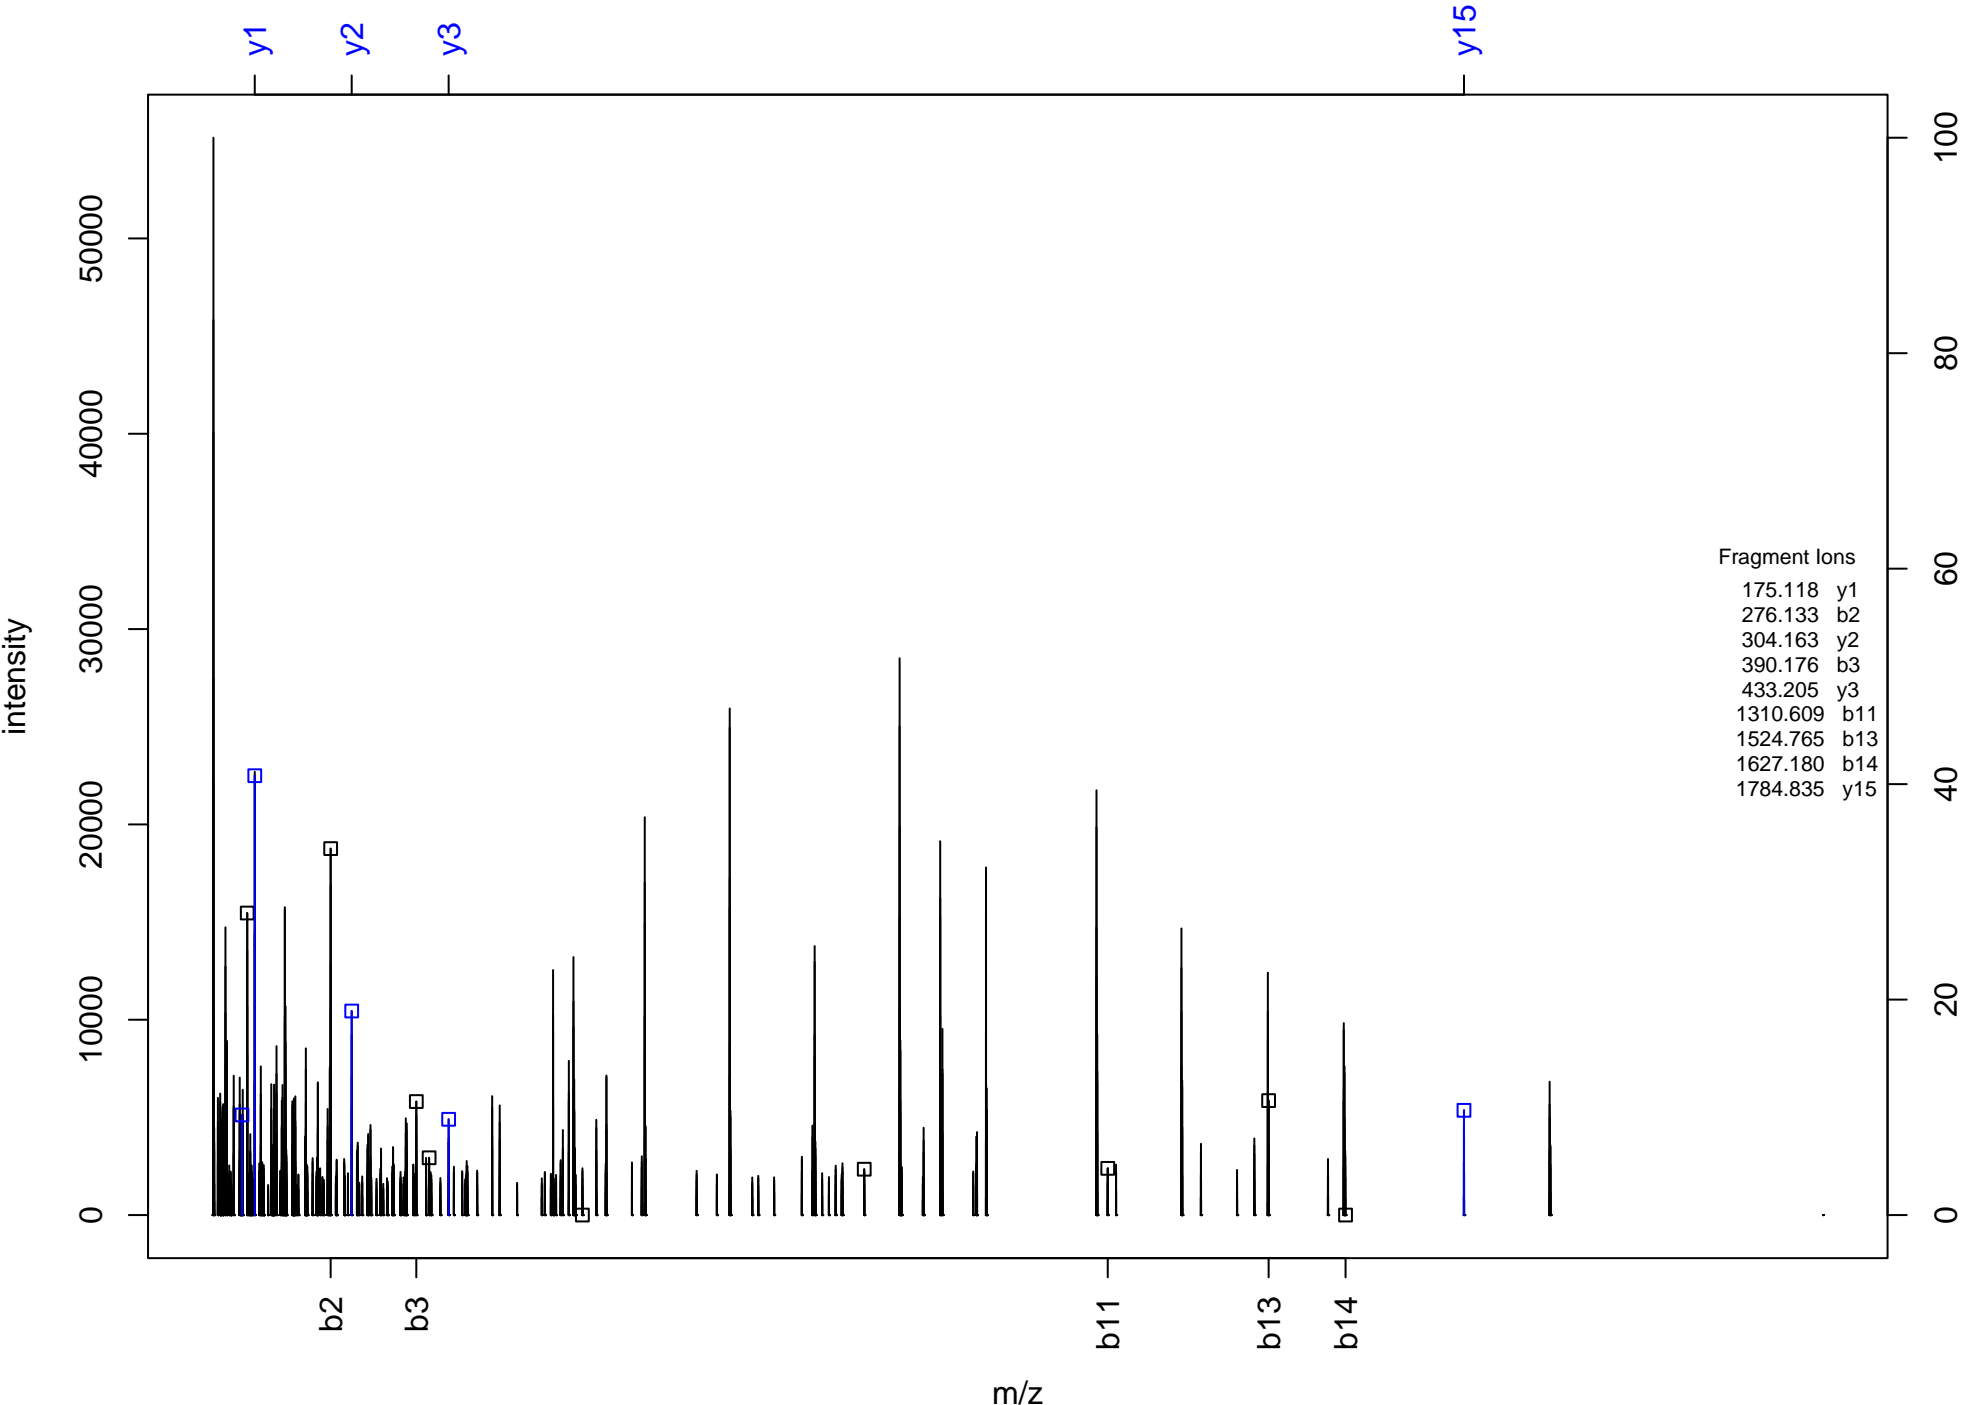

# AQSELSGADEAAR

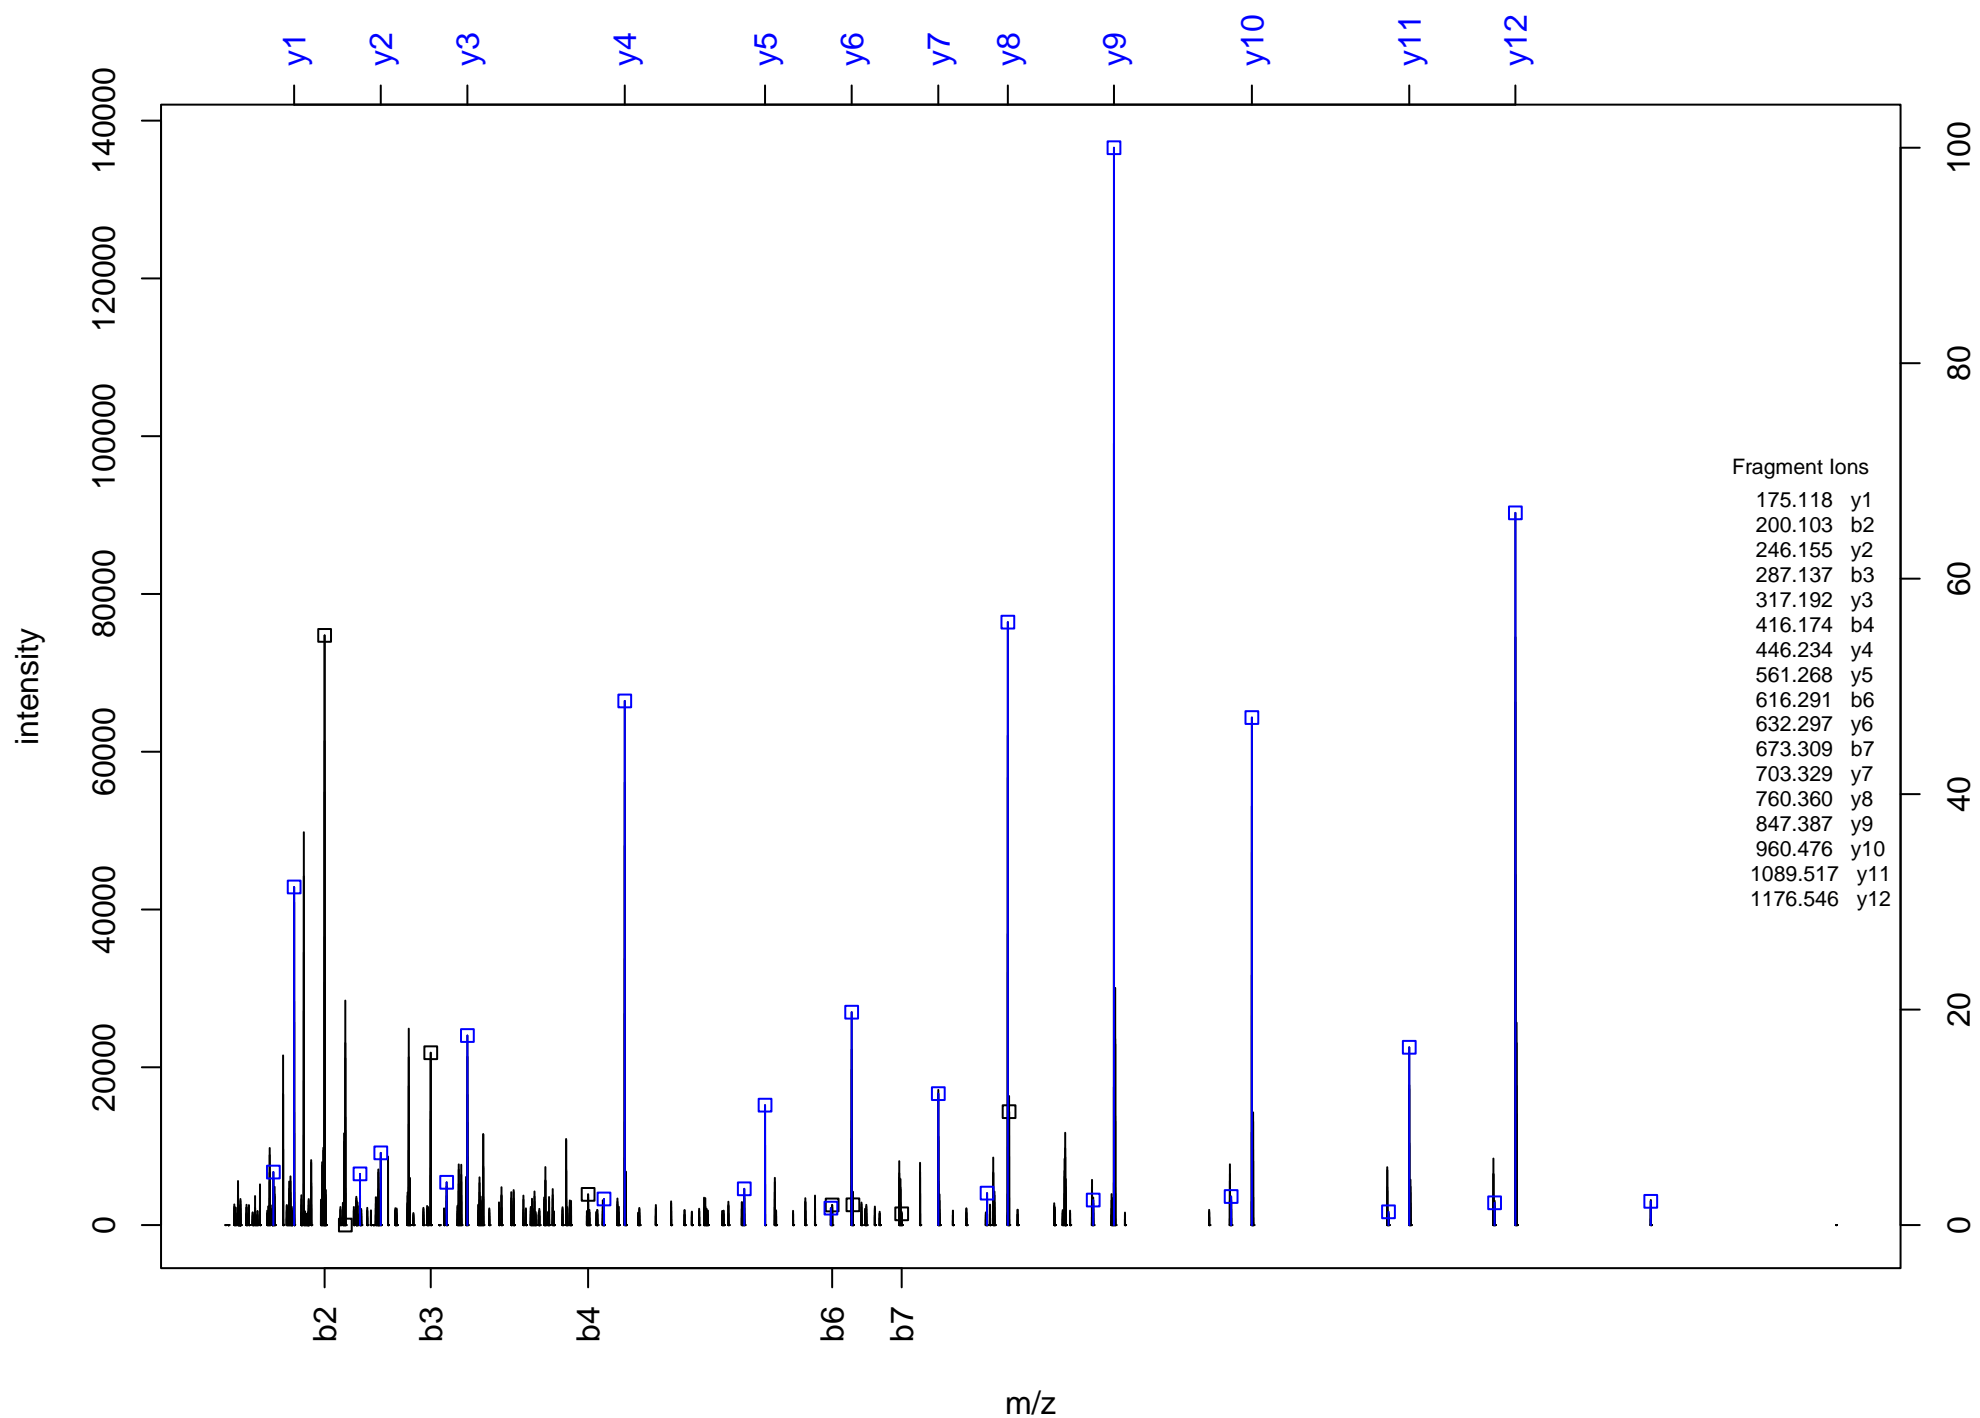

# ANLPDLQFLGPYPYATLK

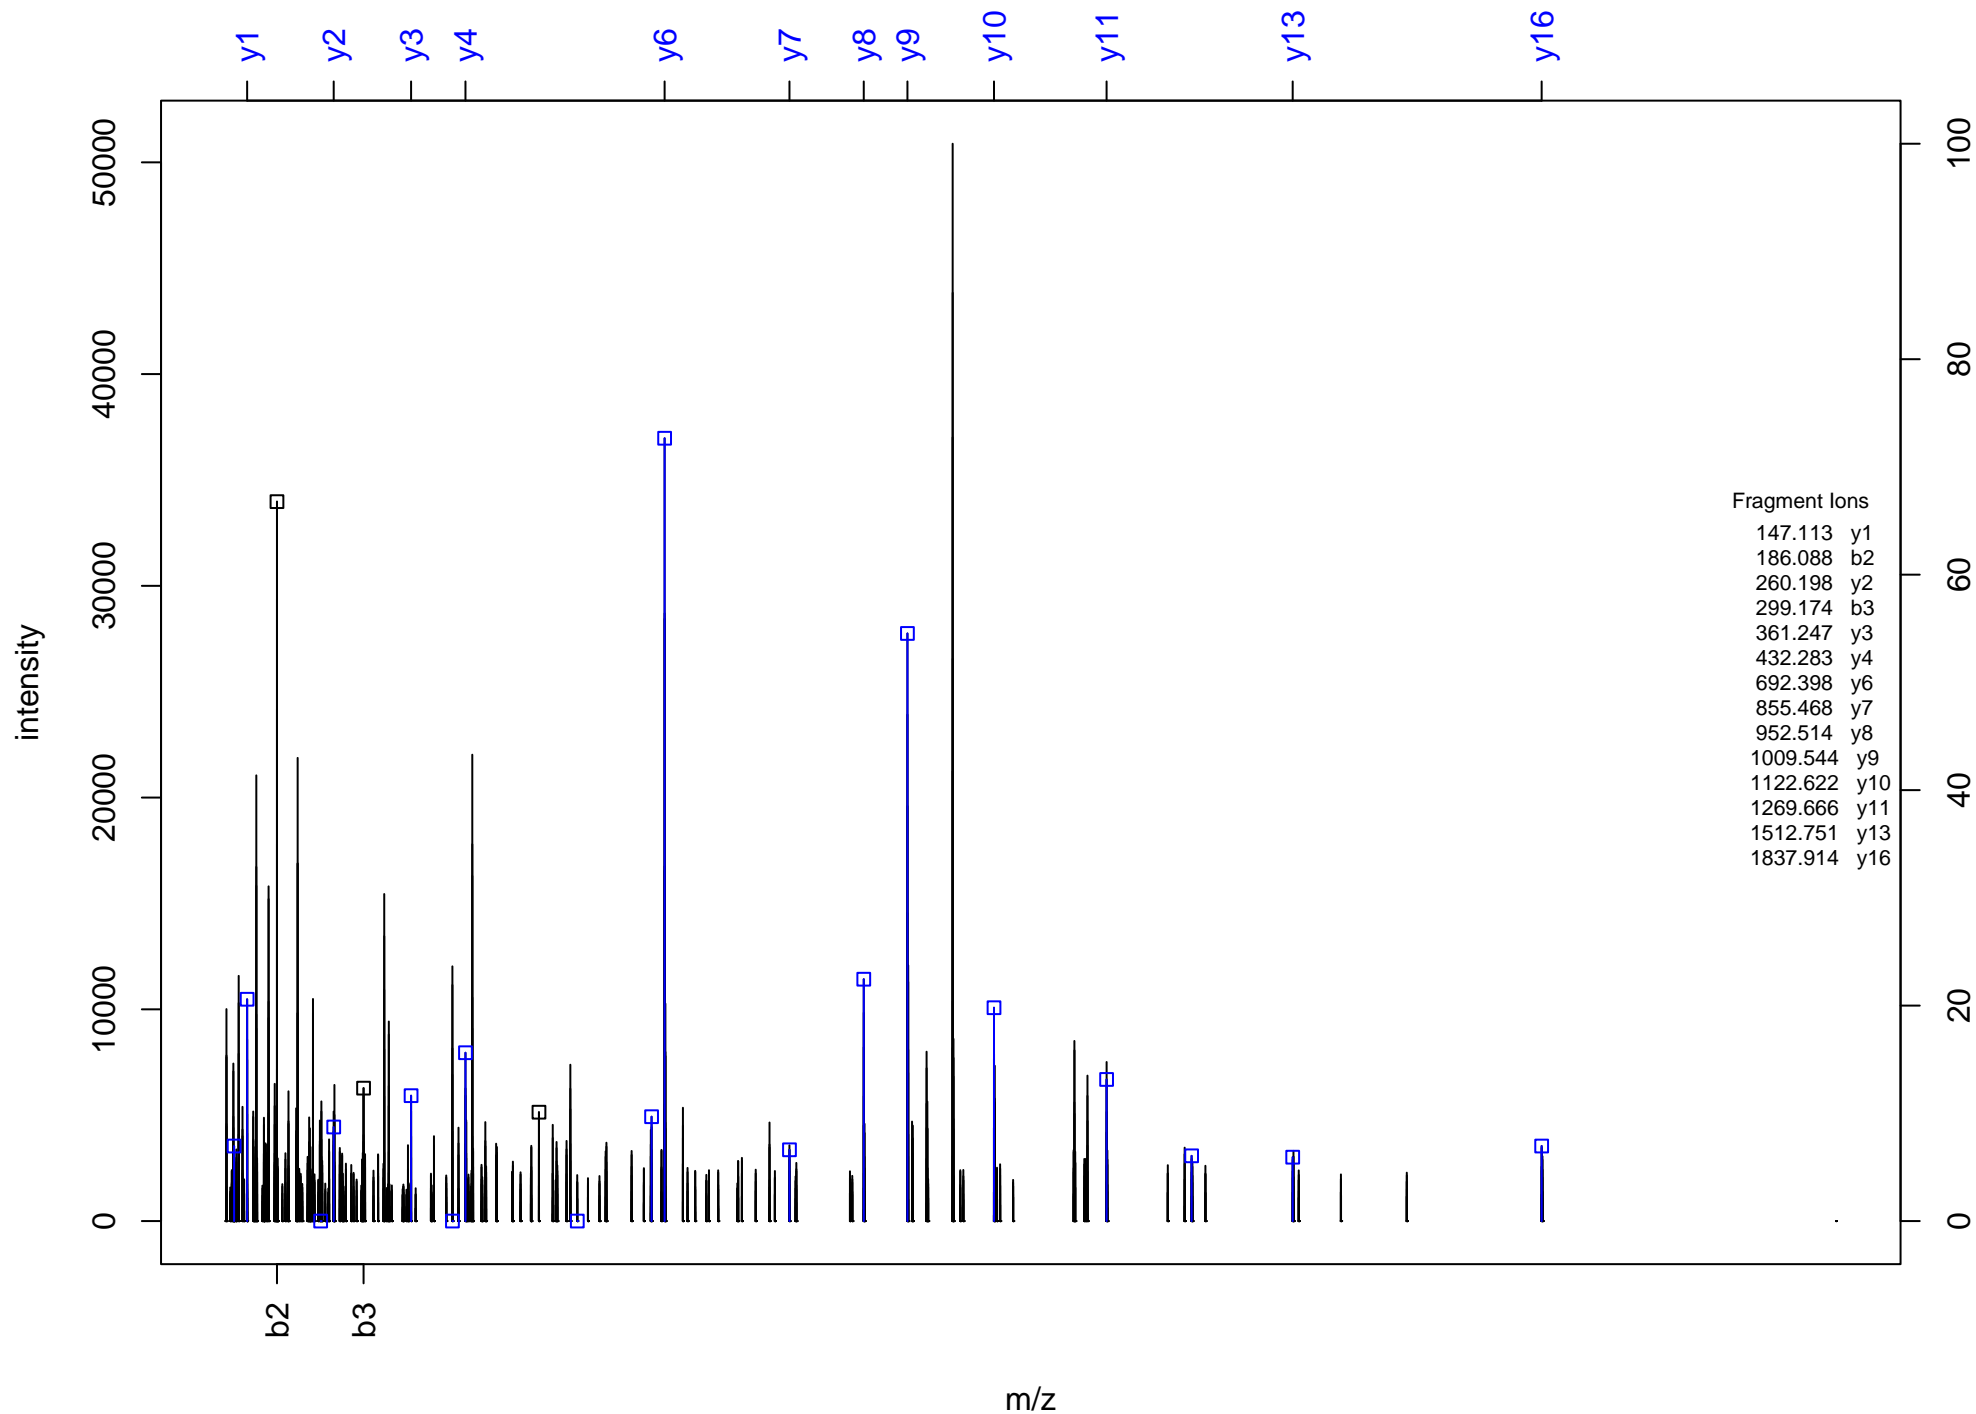

# SSFATPGVNVGLFCSTPAVALGR

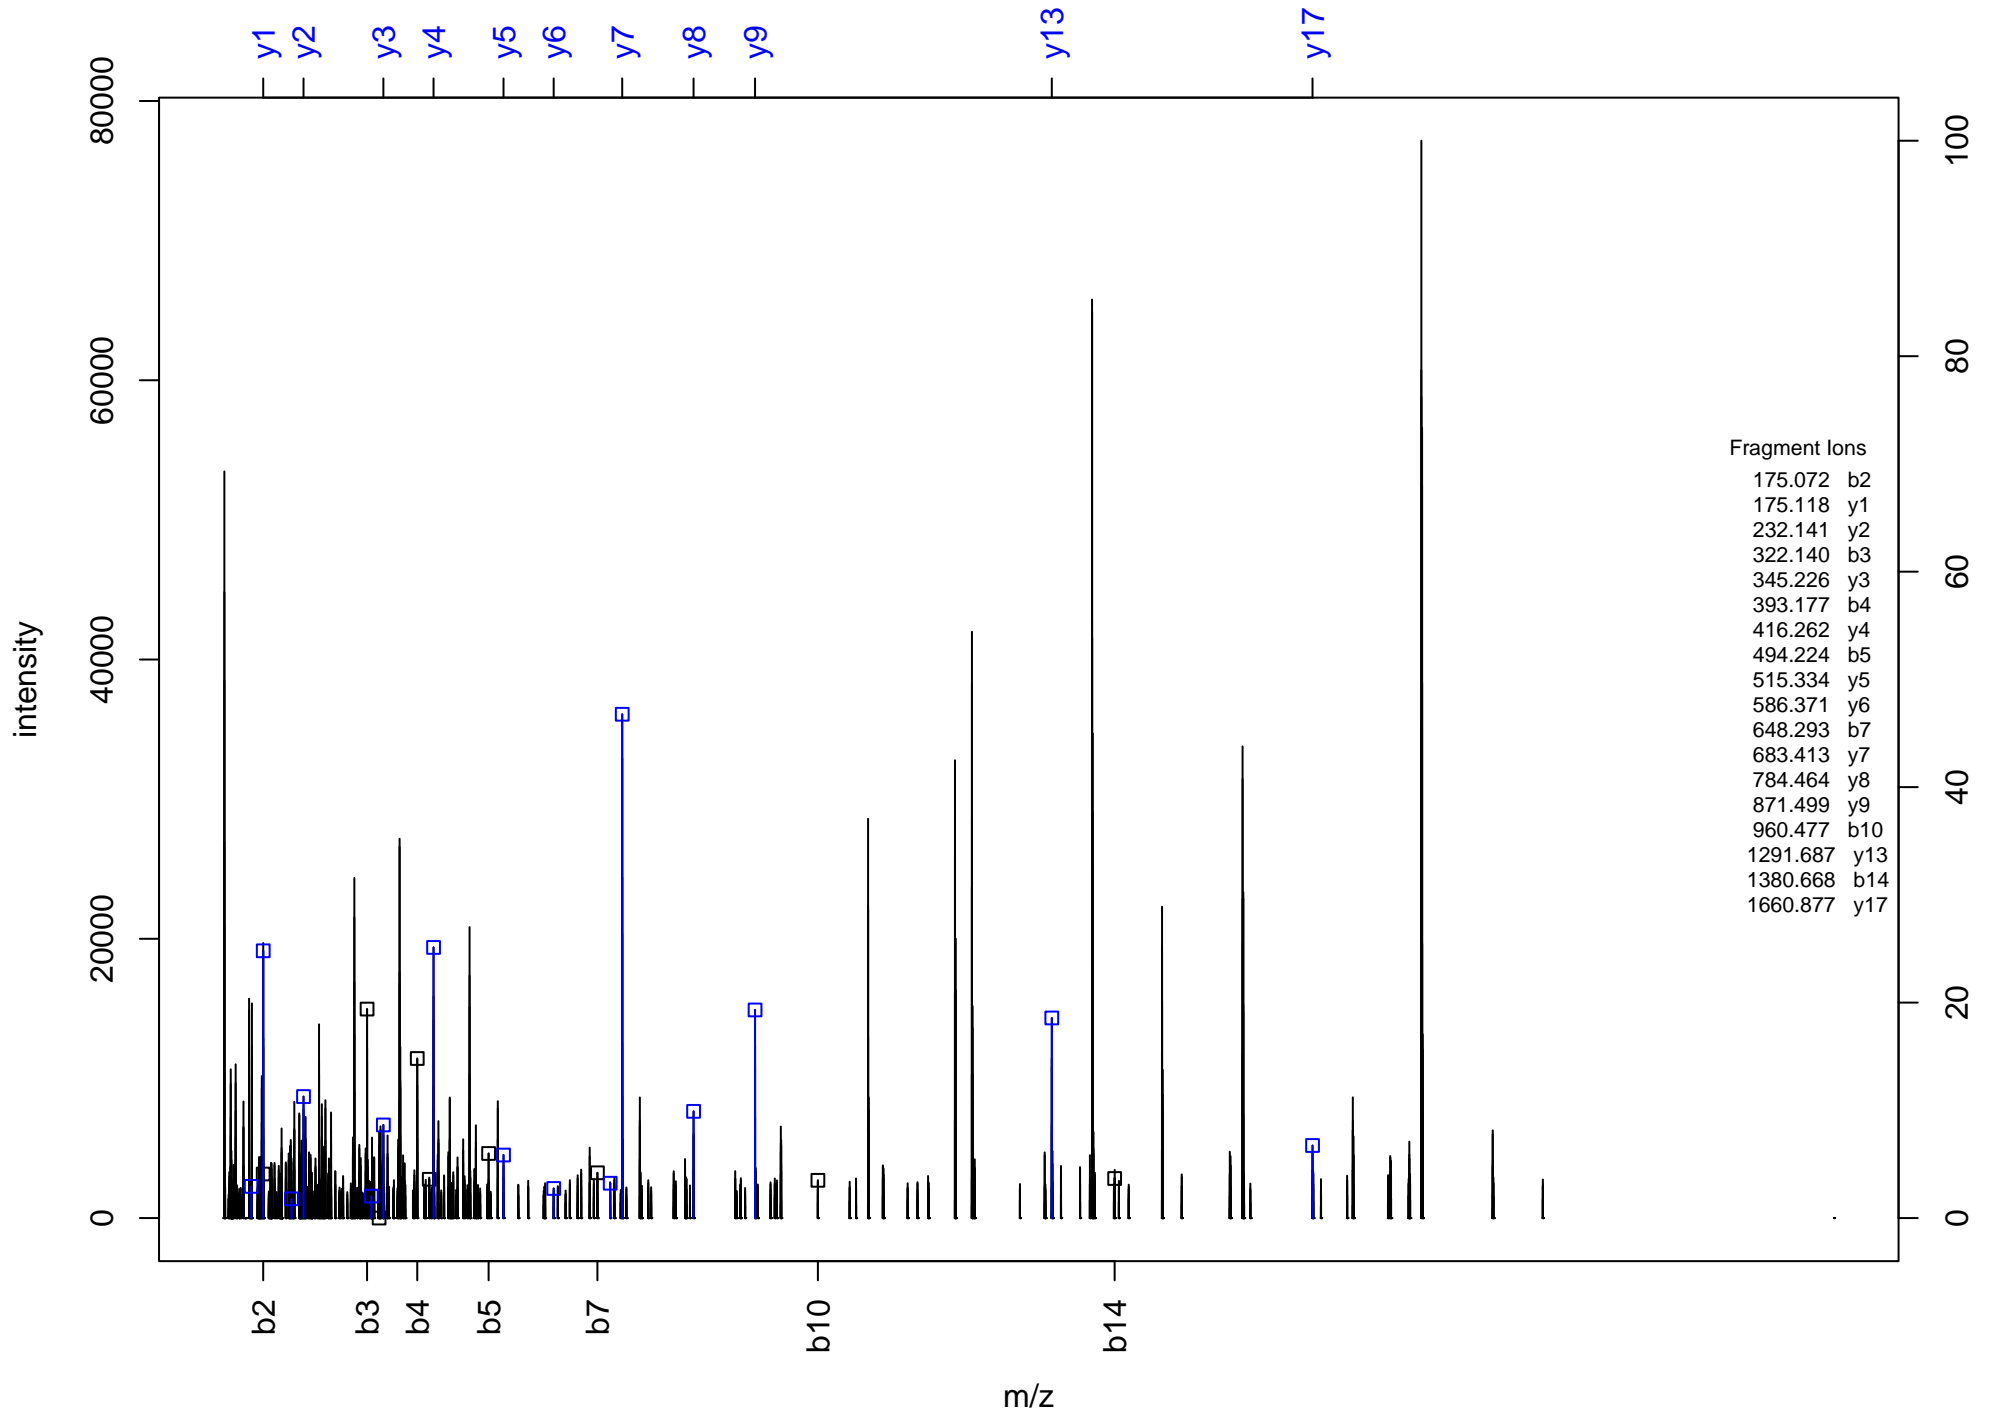

# (Ac)MNKAN<sup>^</sup>LLHIDTN<sup>^</sup>IK

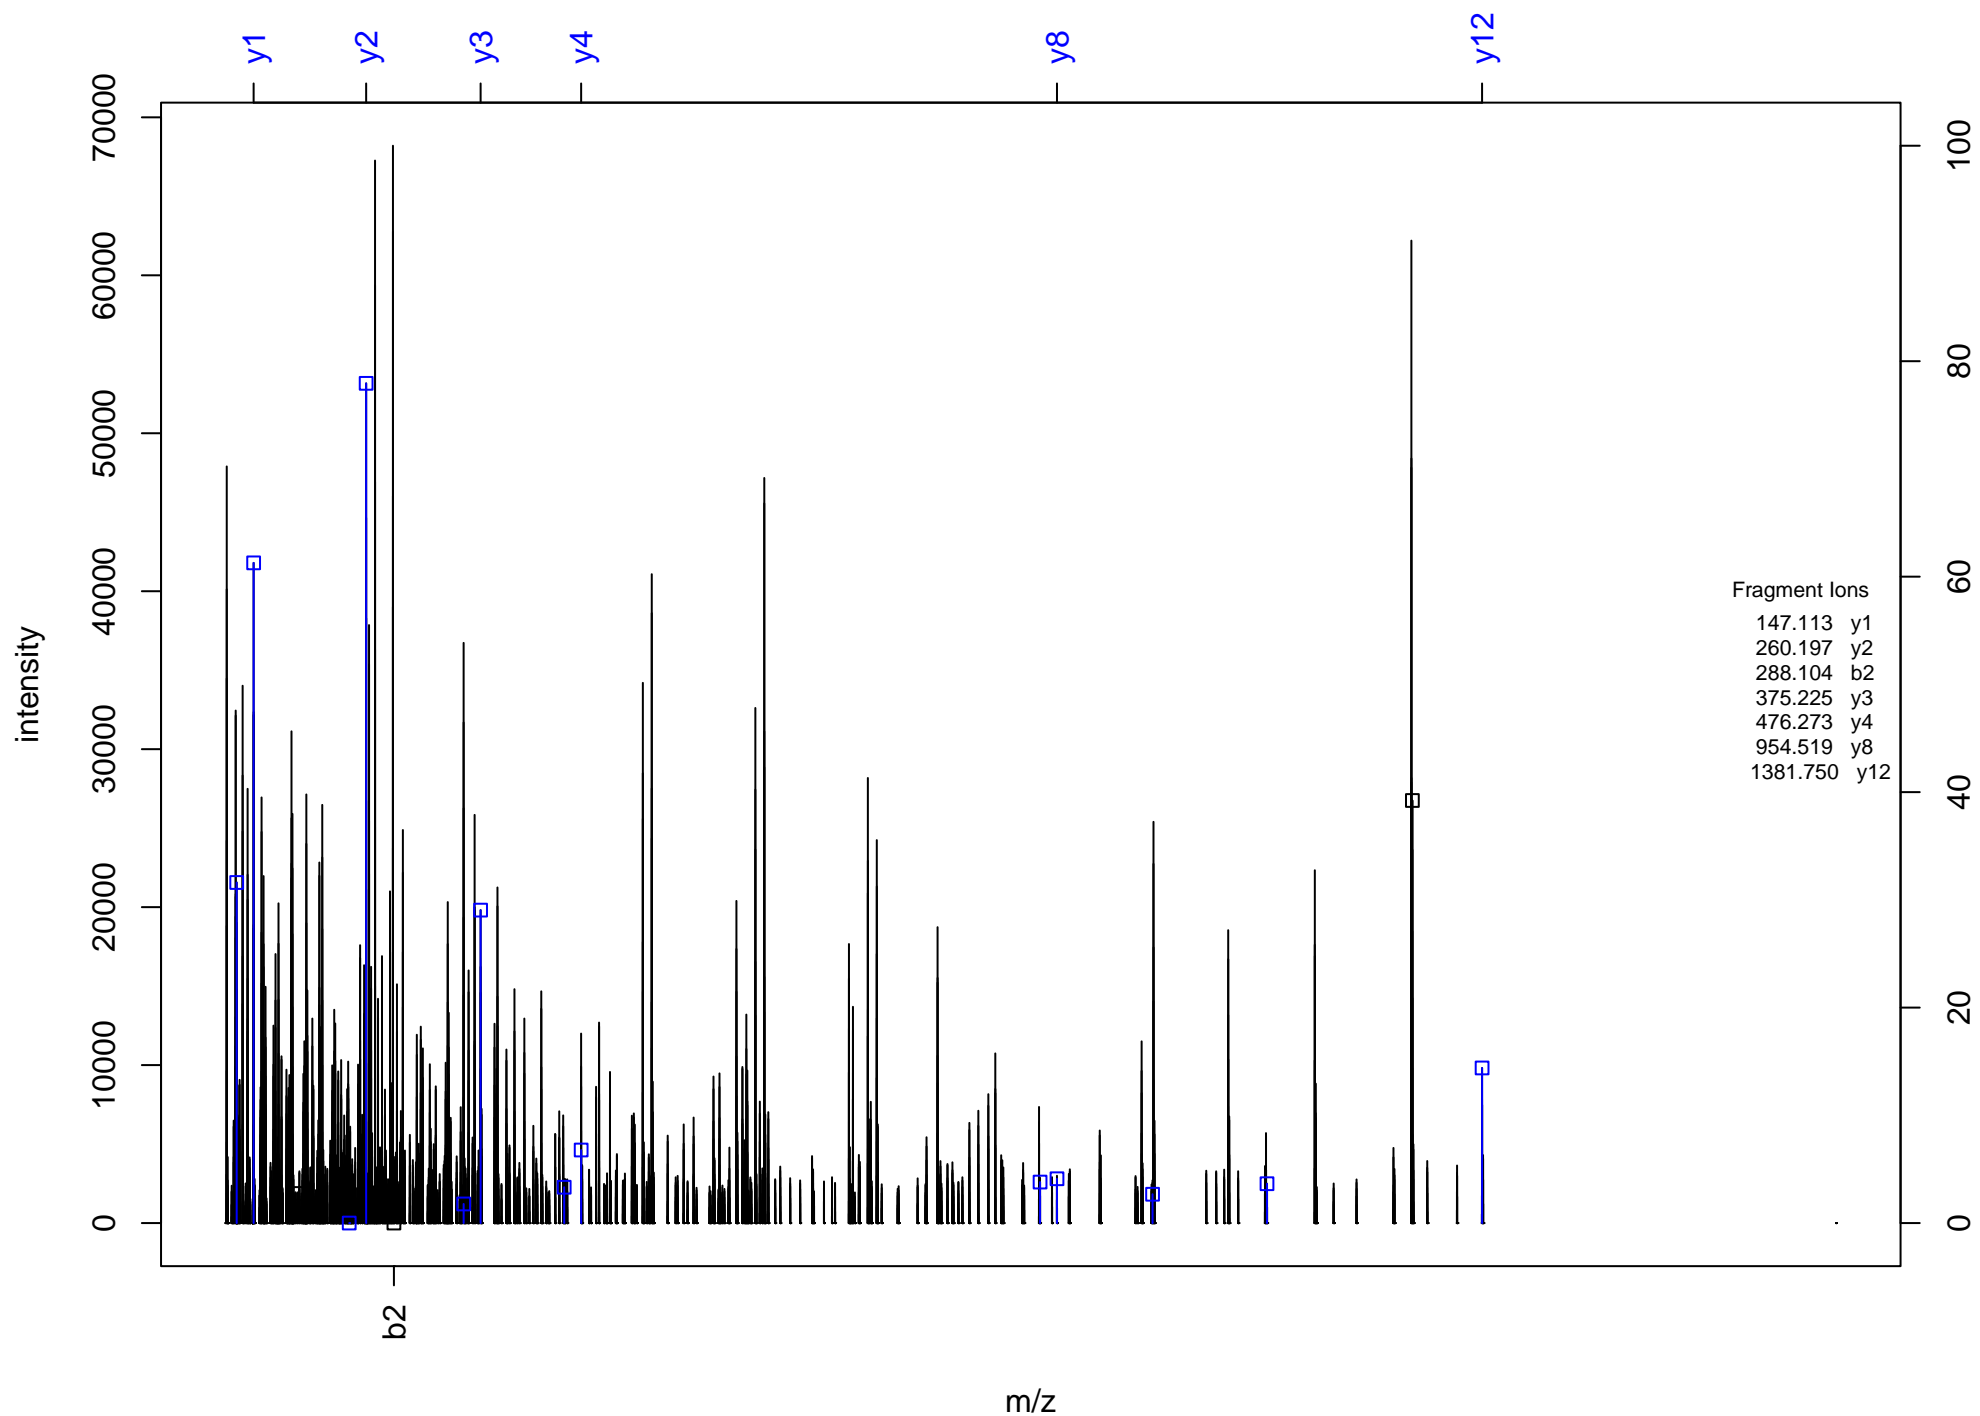



# (Ac)SDAAVDTSSEITTK

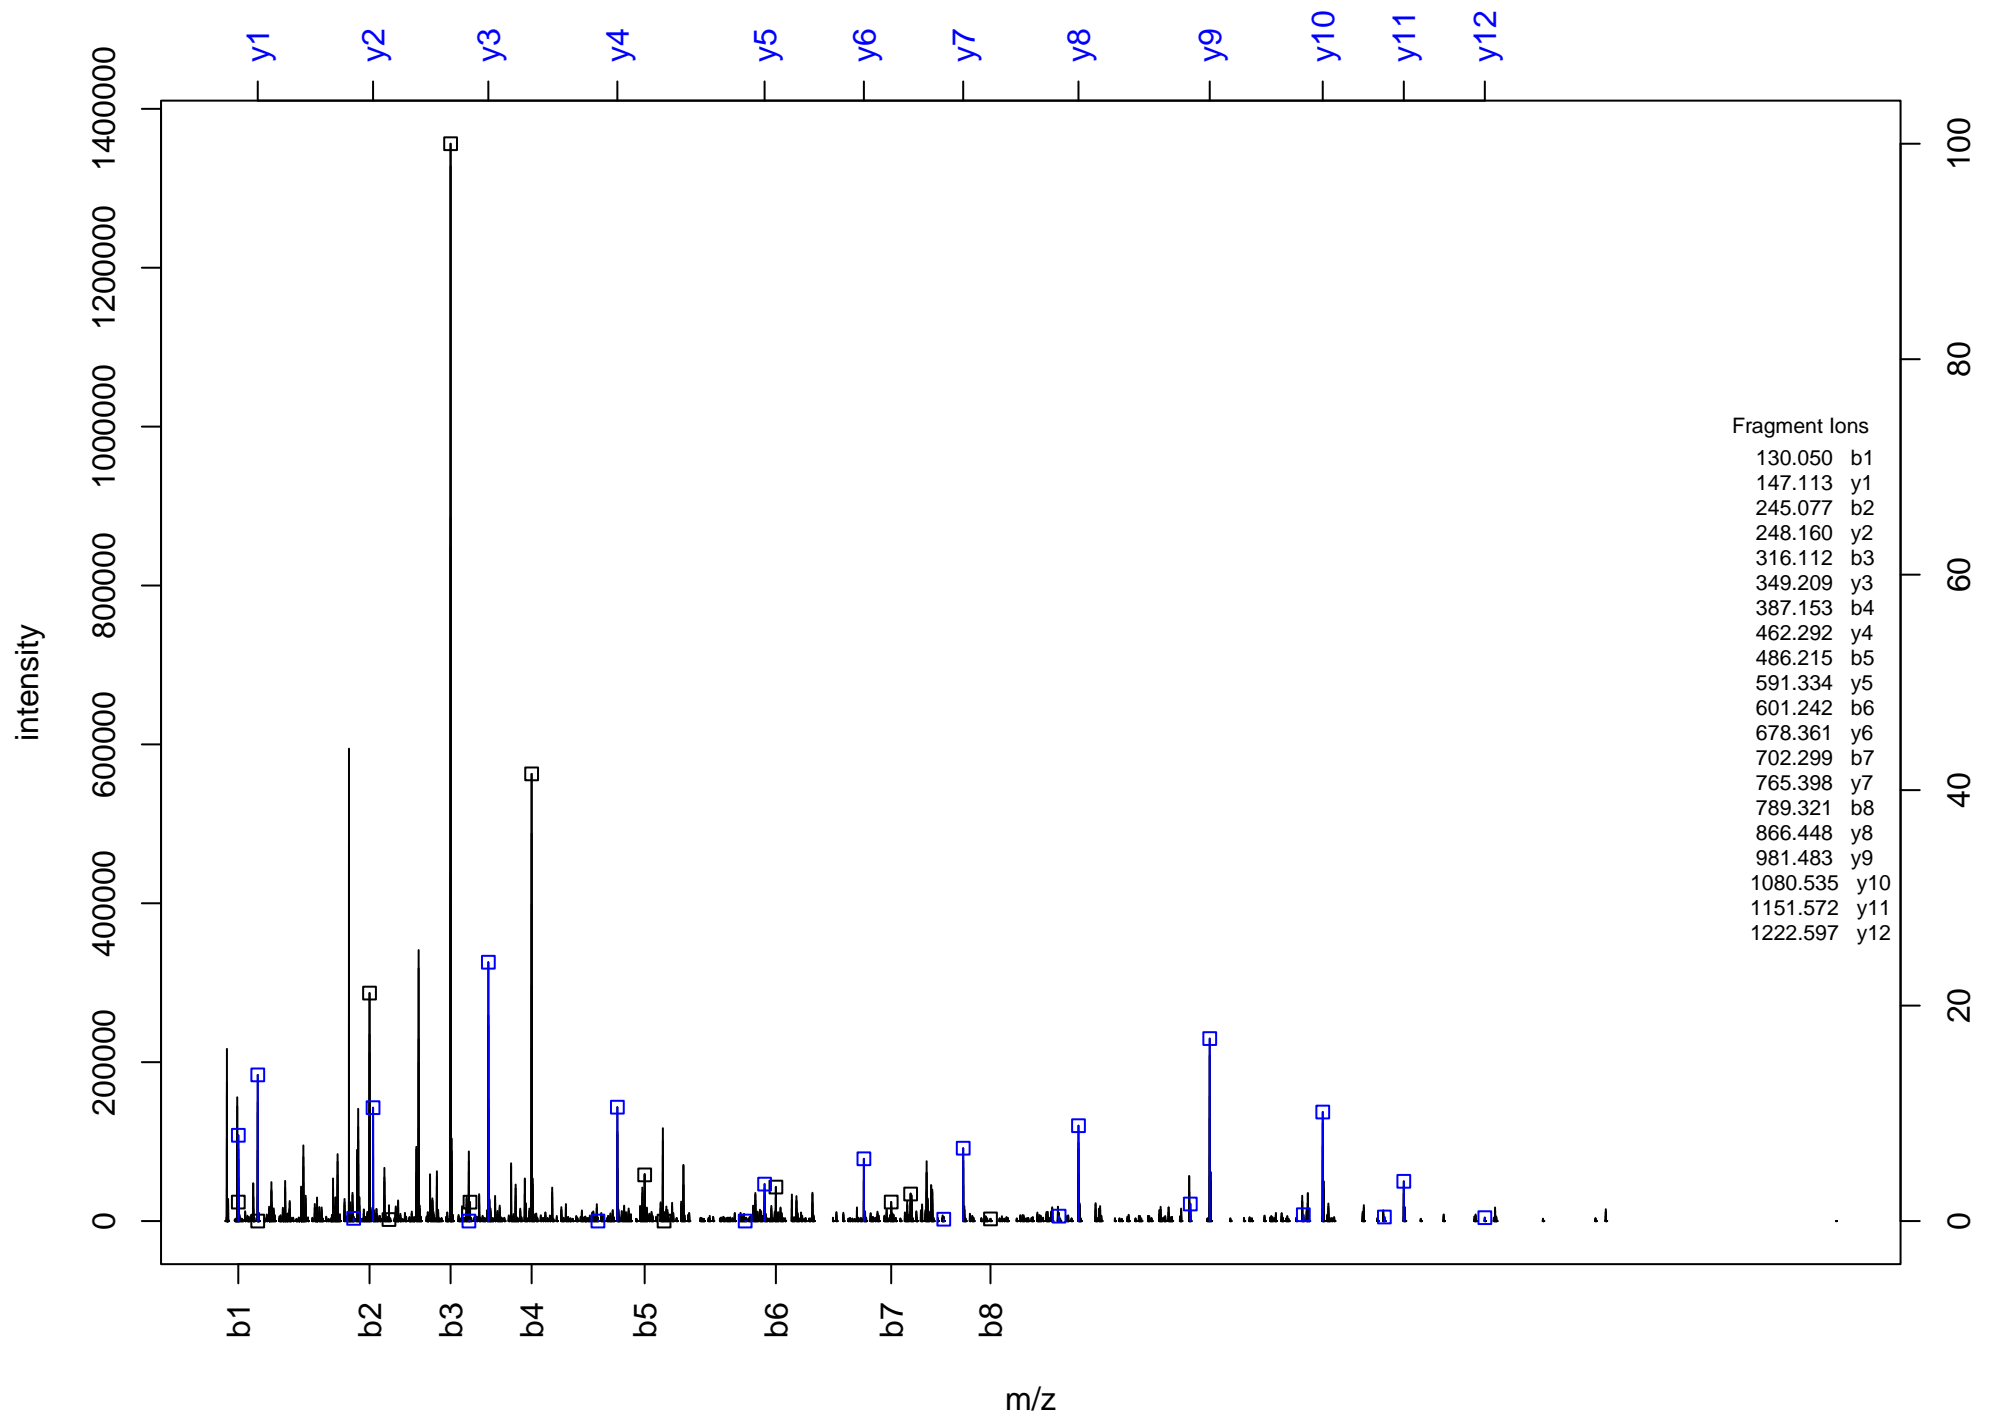

# ISSTLYQATAPVLTPAK

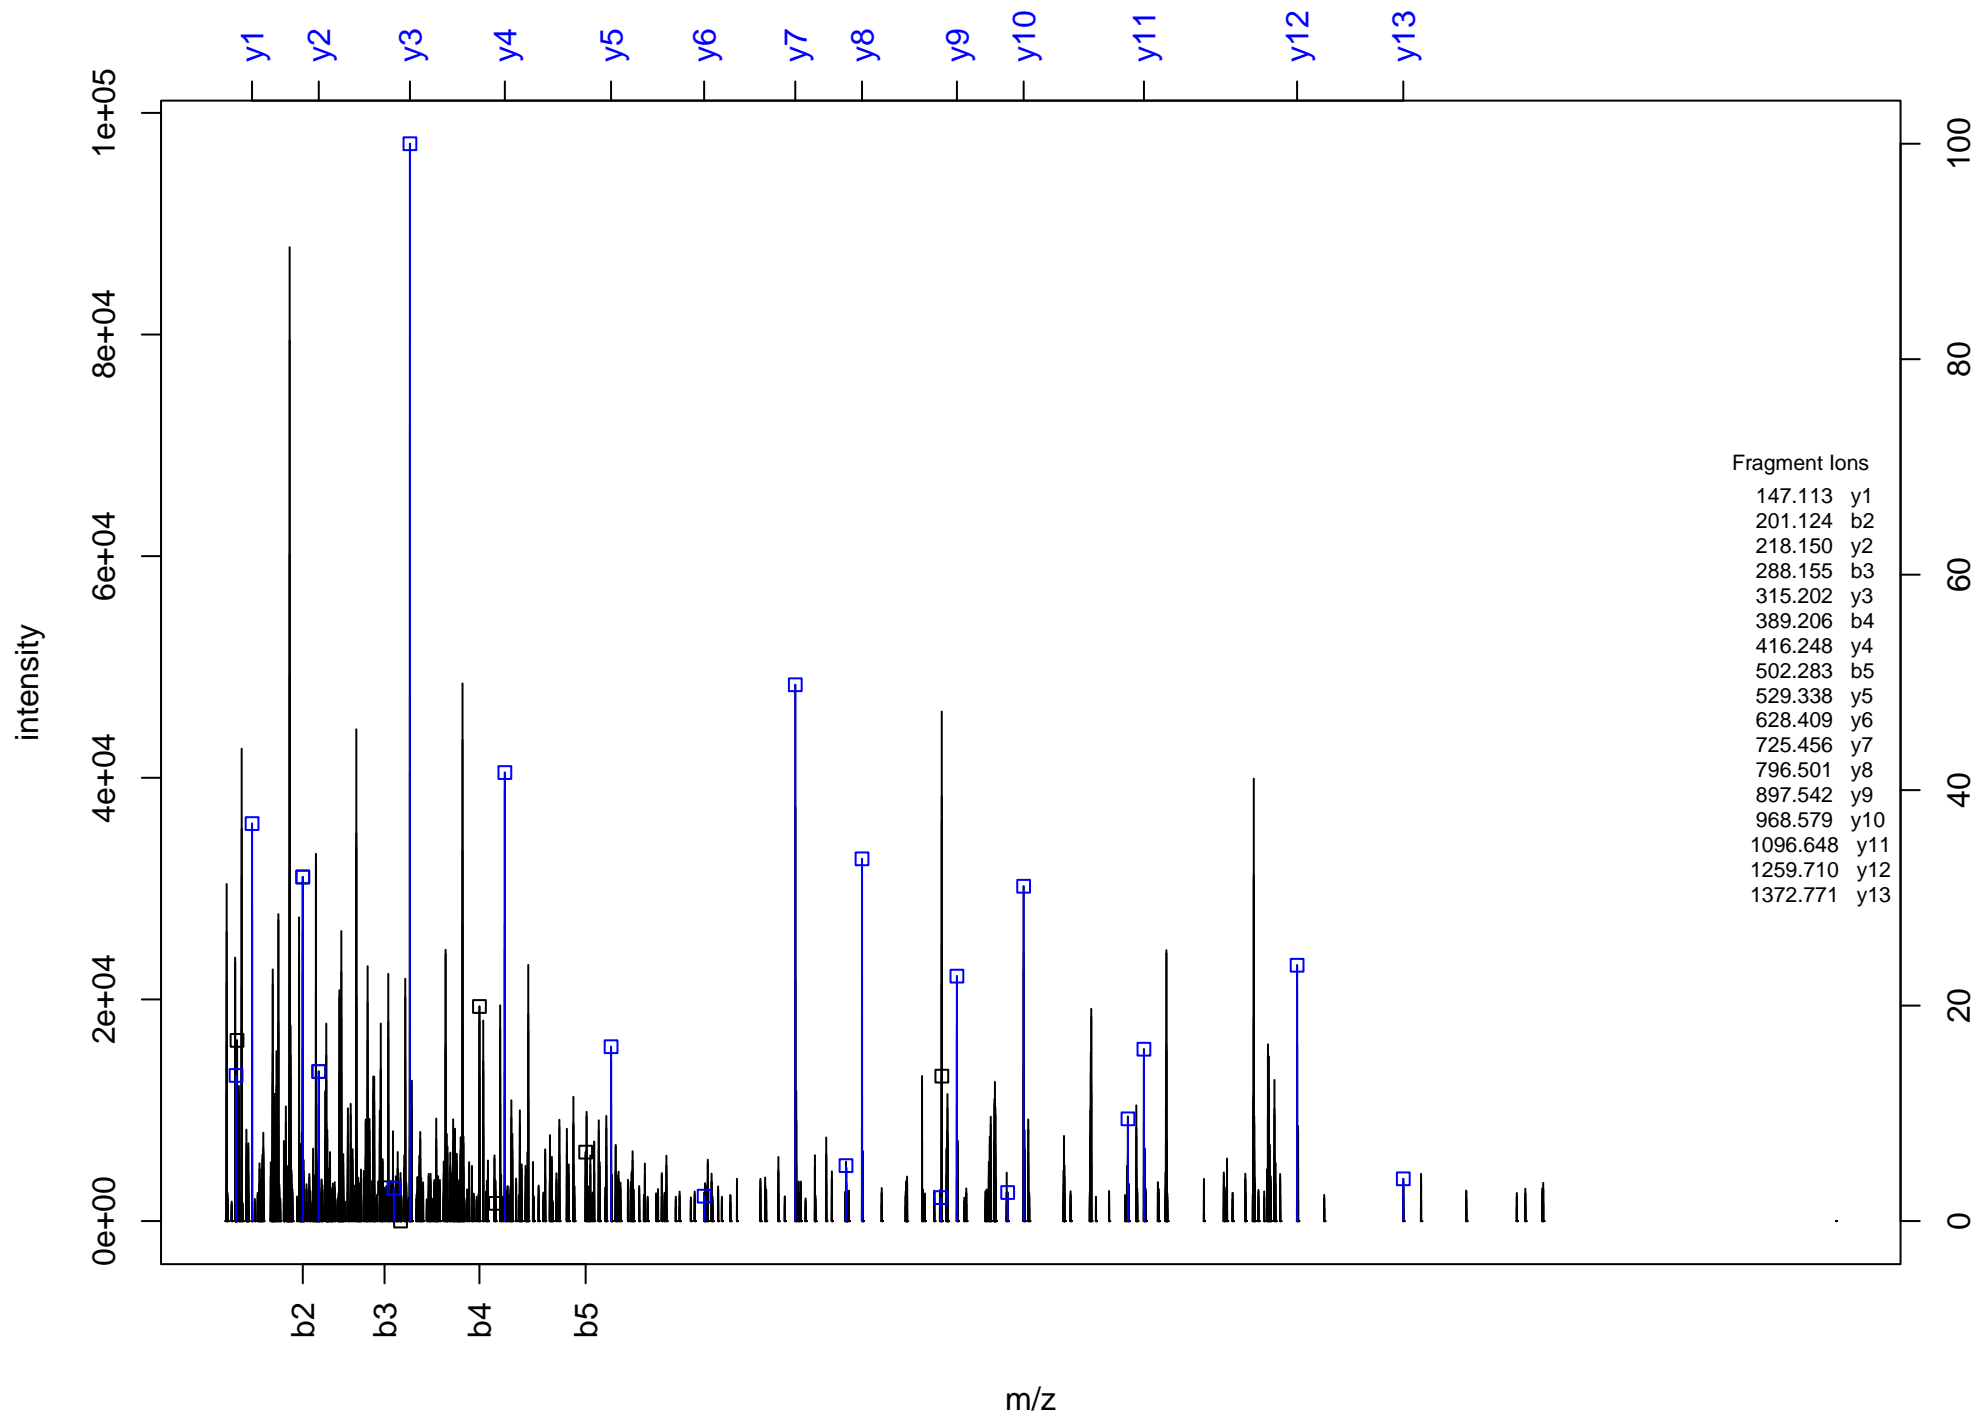

# N<sup>+</sup>QIQ<sup>+</sup>Q<sup>+</sup>AFVER

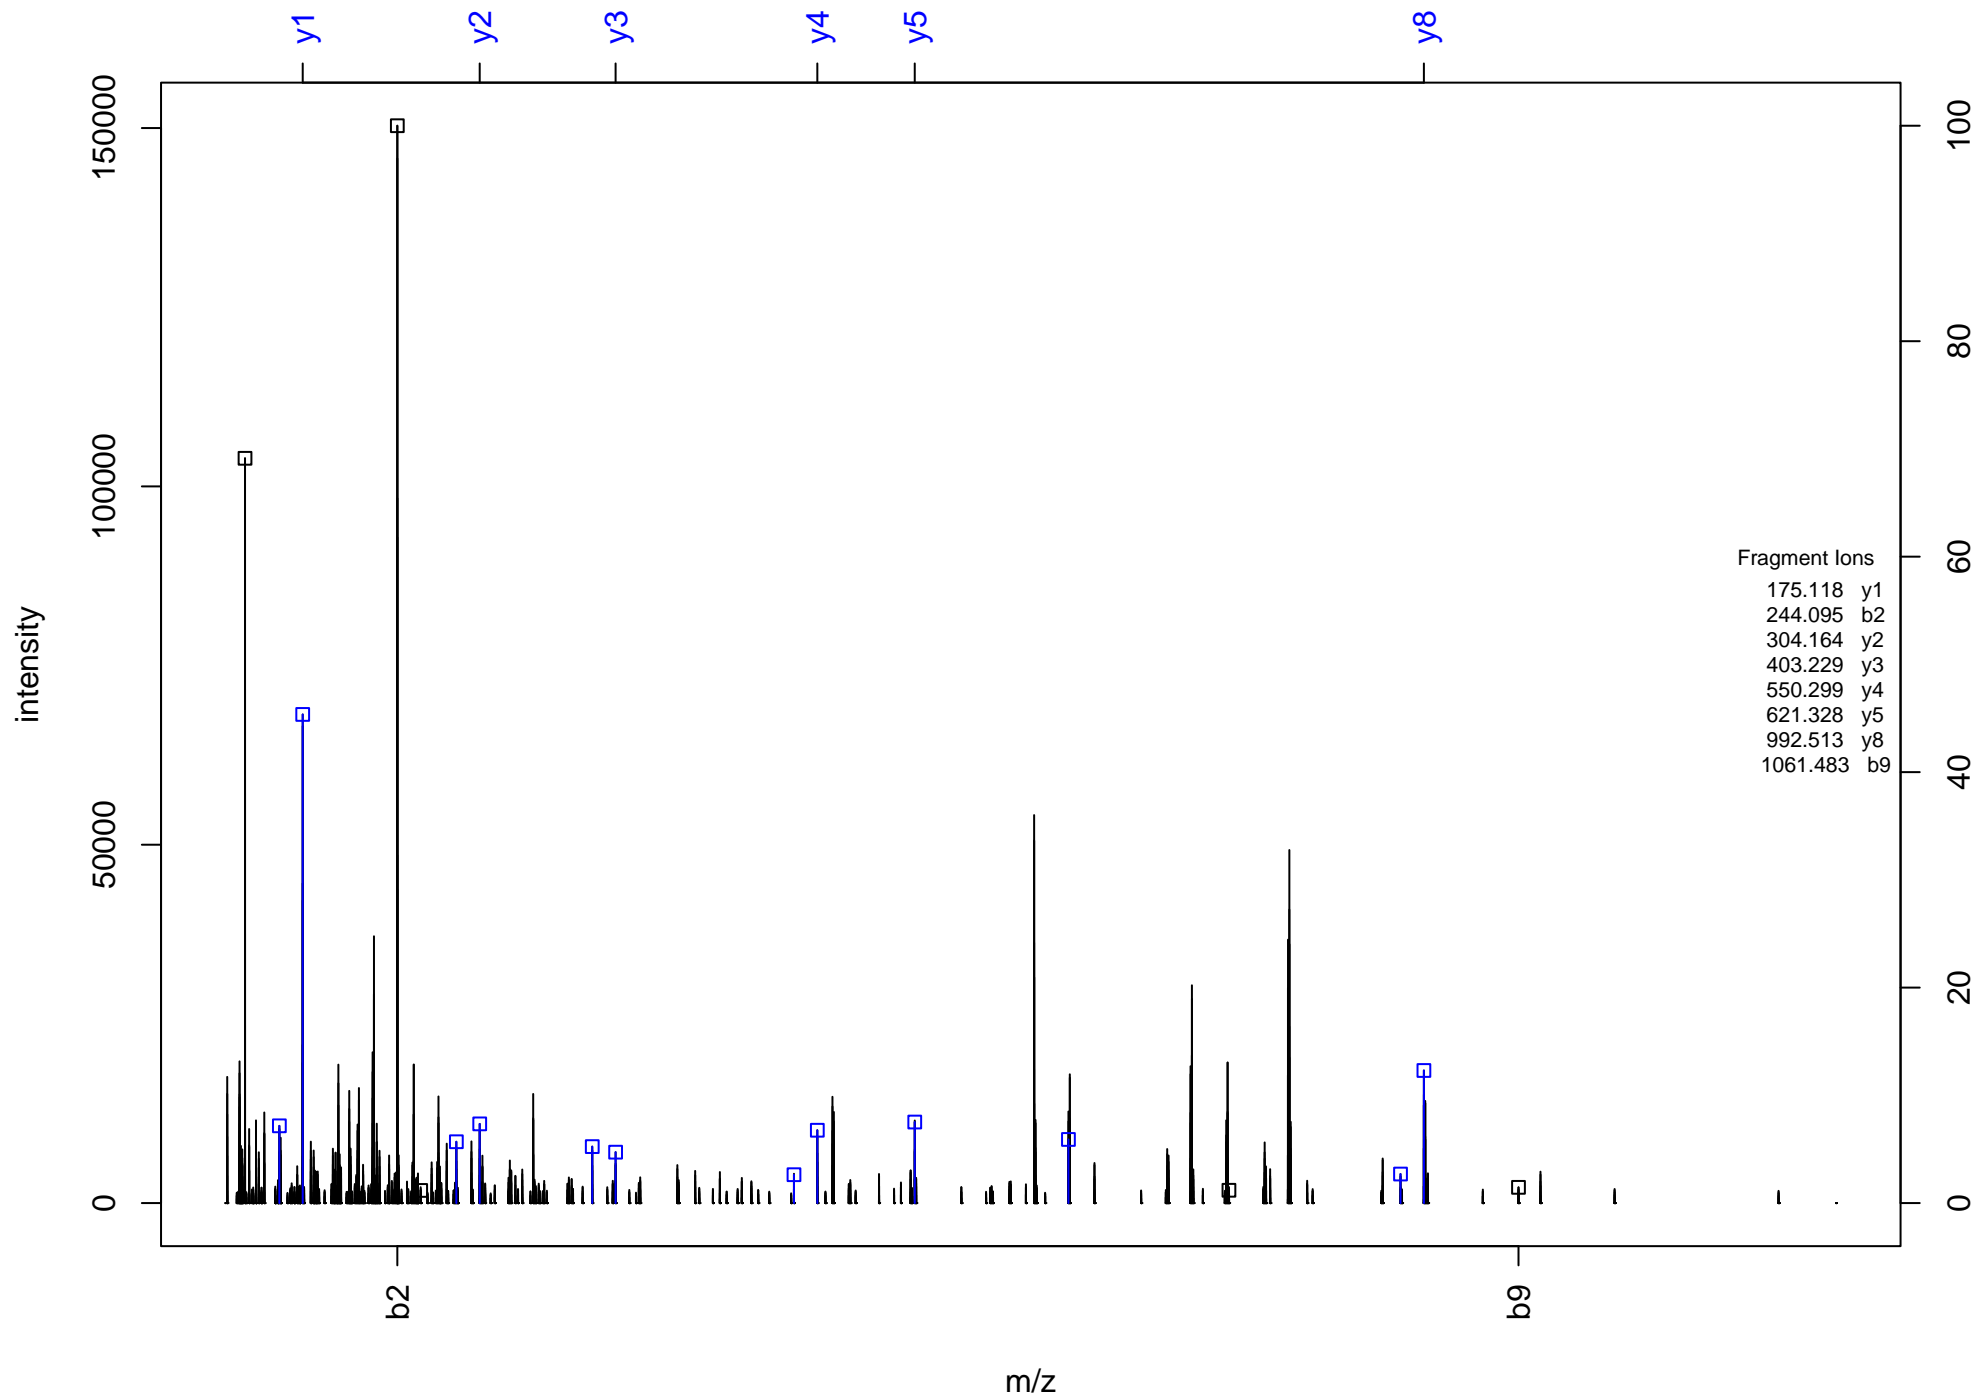

# (Ac)MEDGELIEYFK

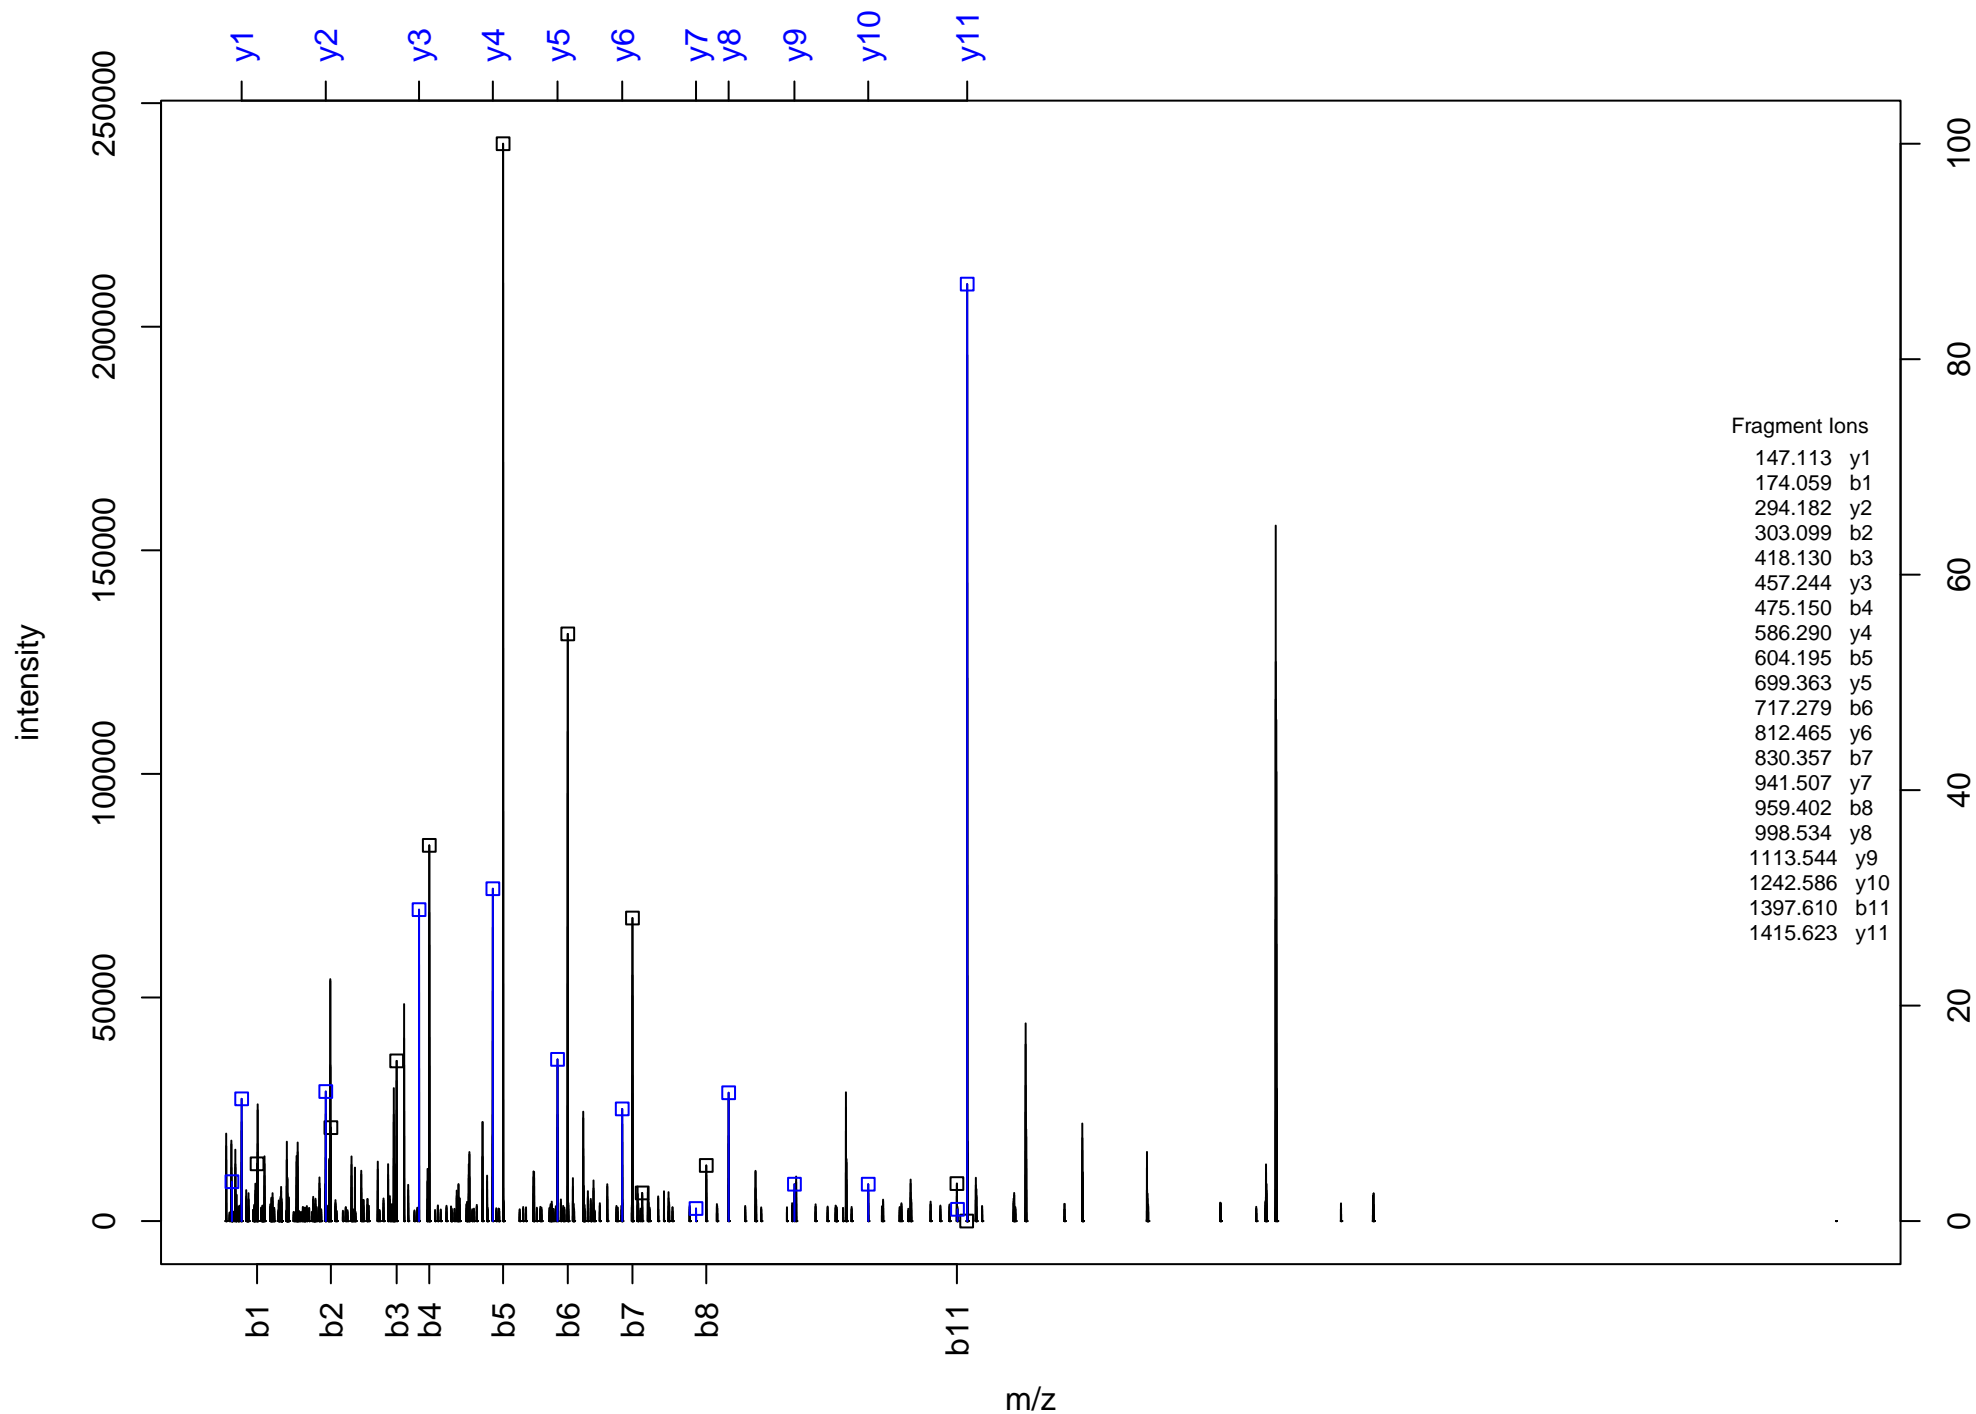

# TLGENEEEEEDLADSGR

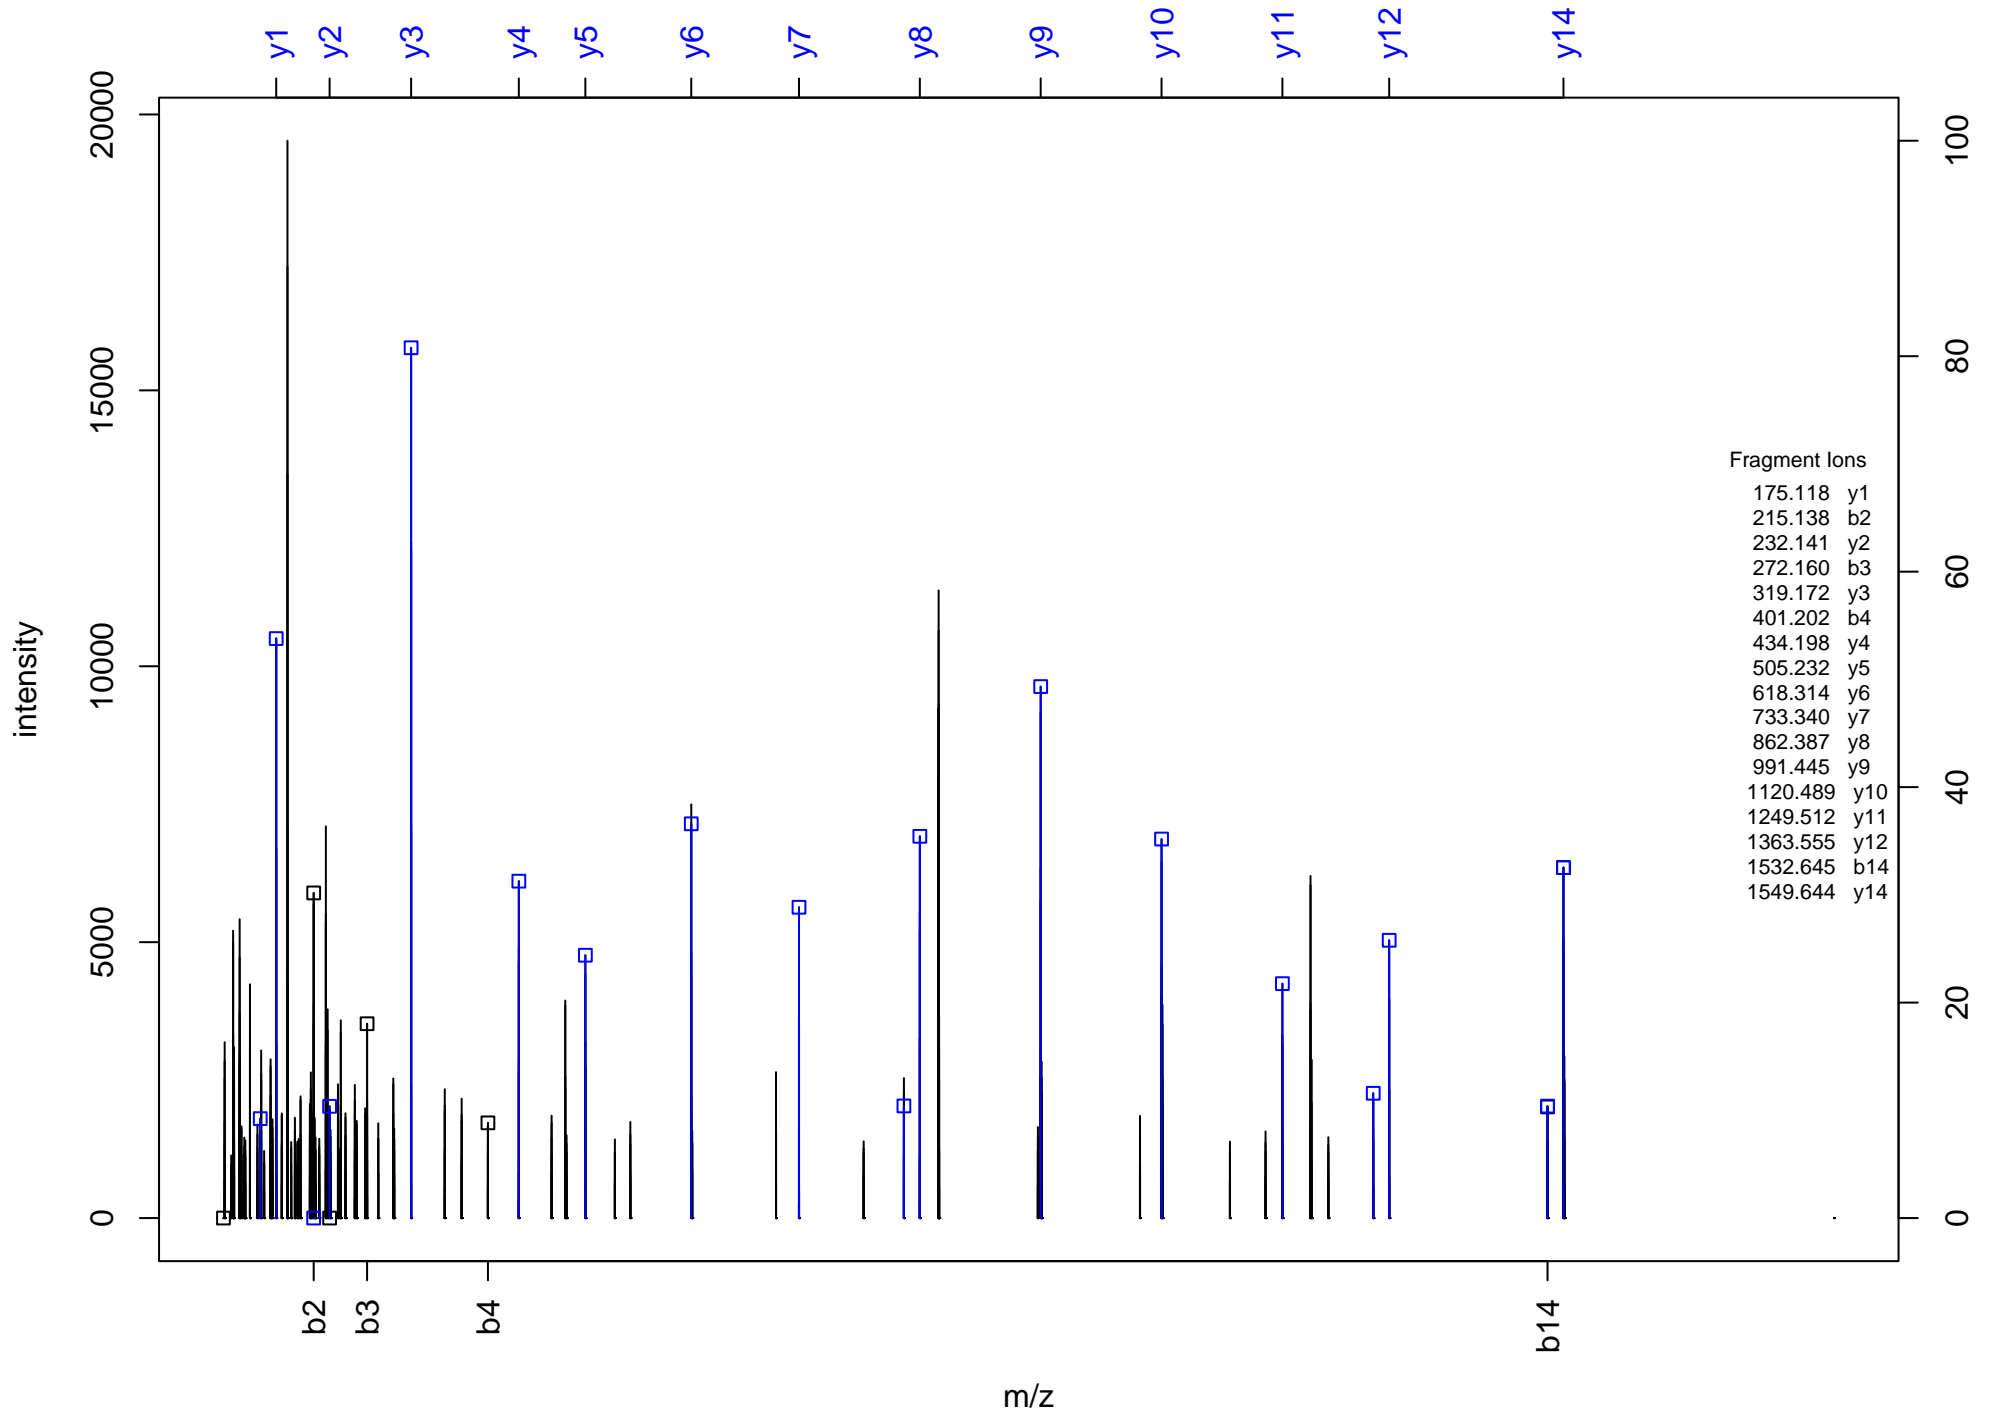

# SWEEQMAEVGR

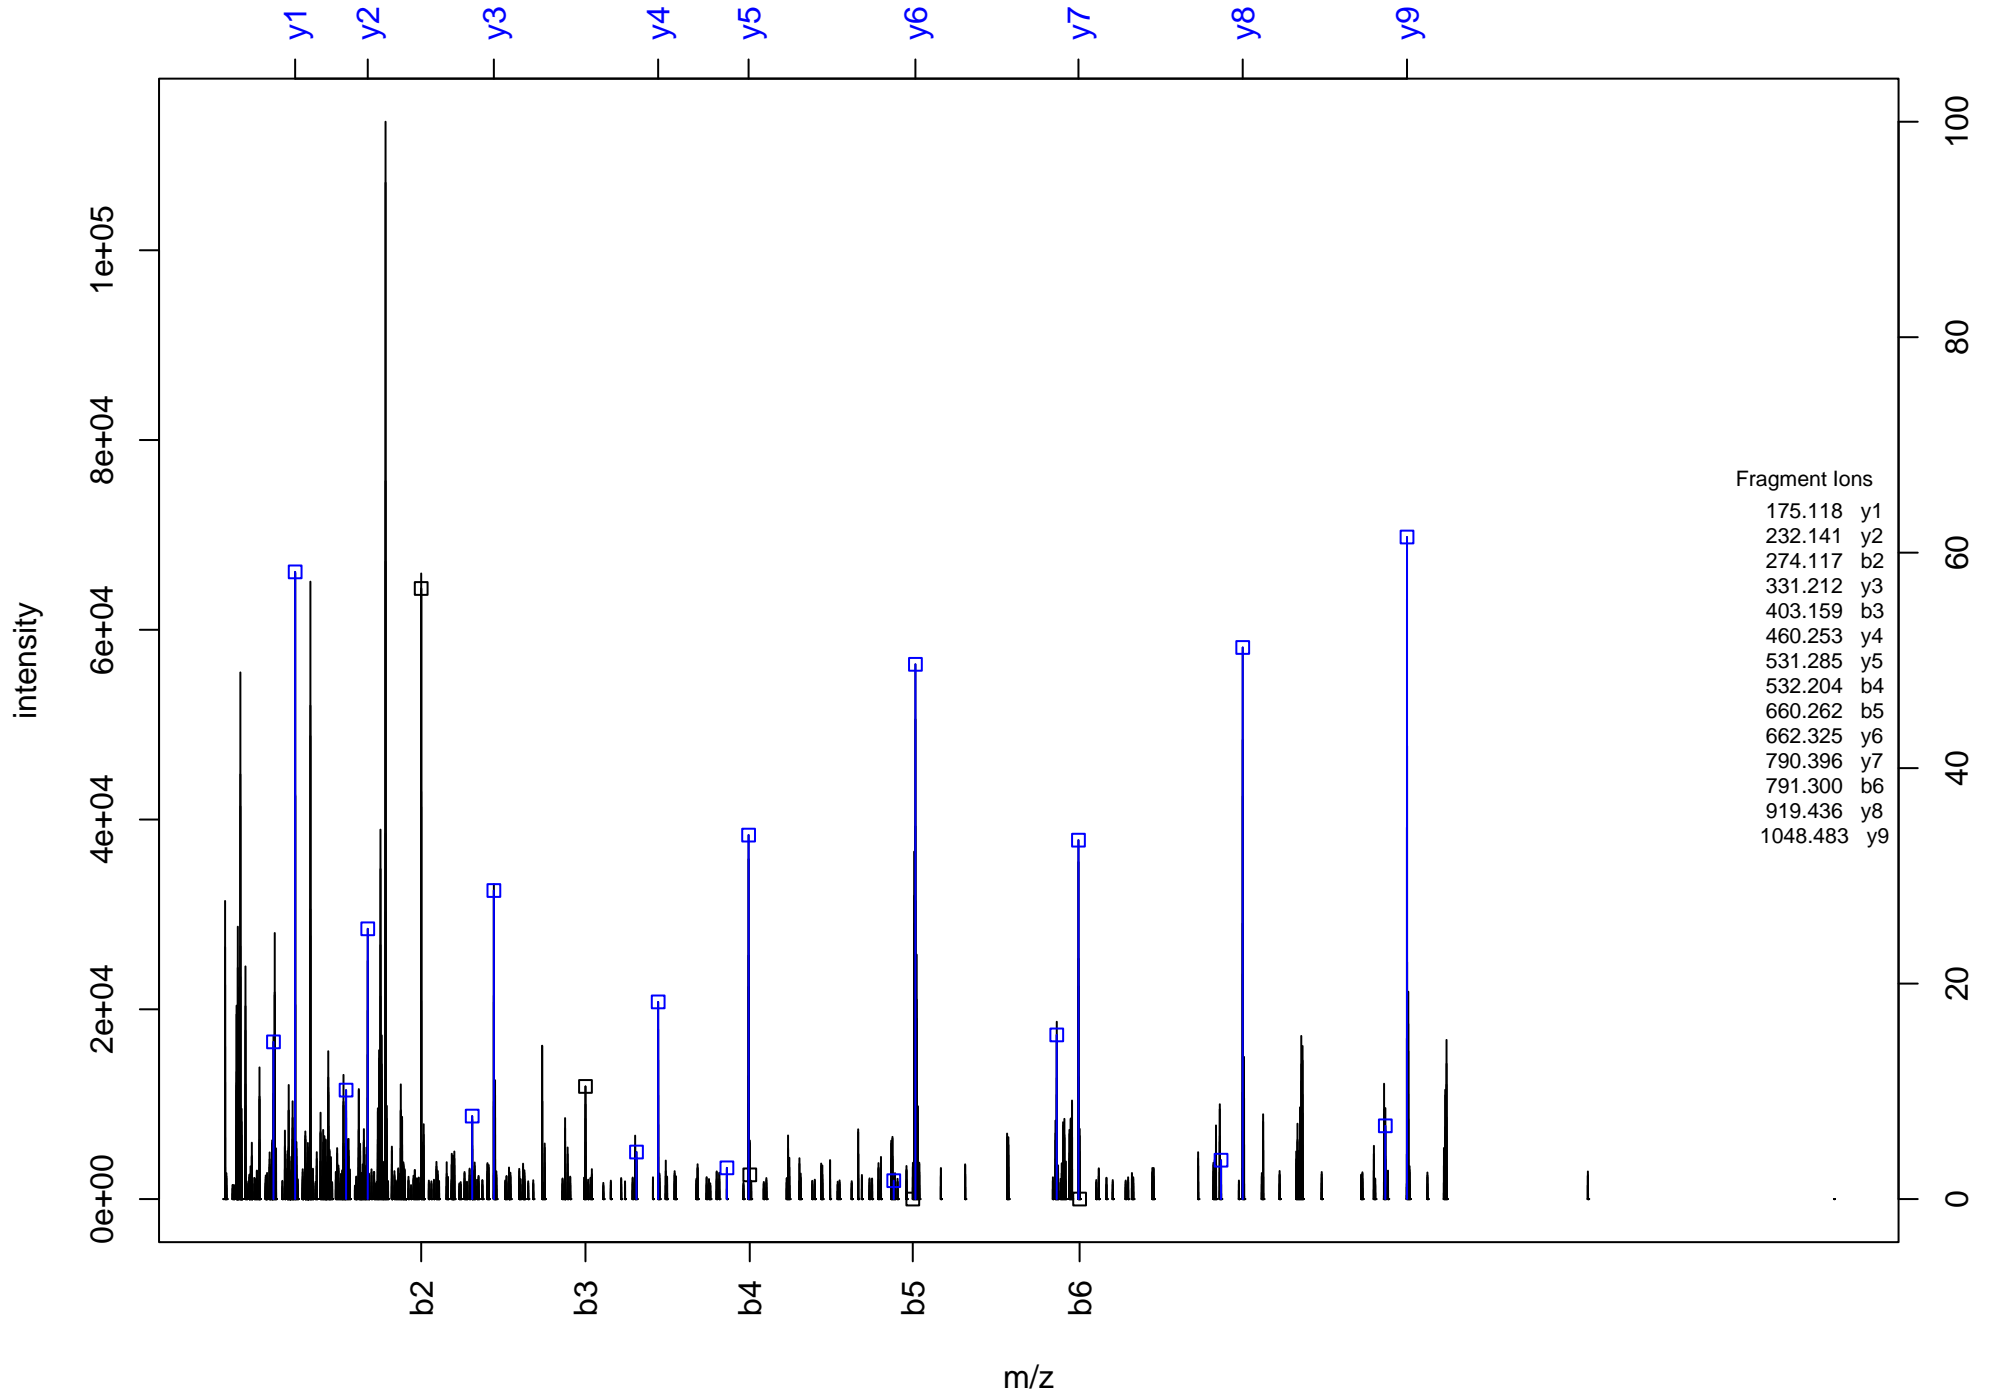

# EDLSLPELLDEEDVLQECK

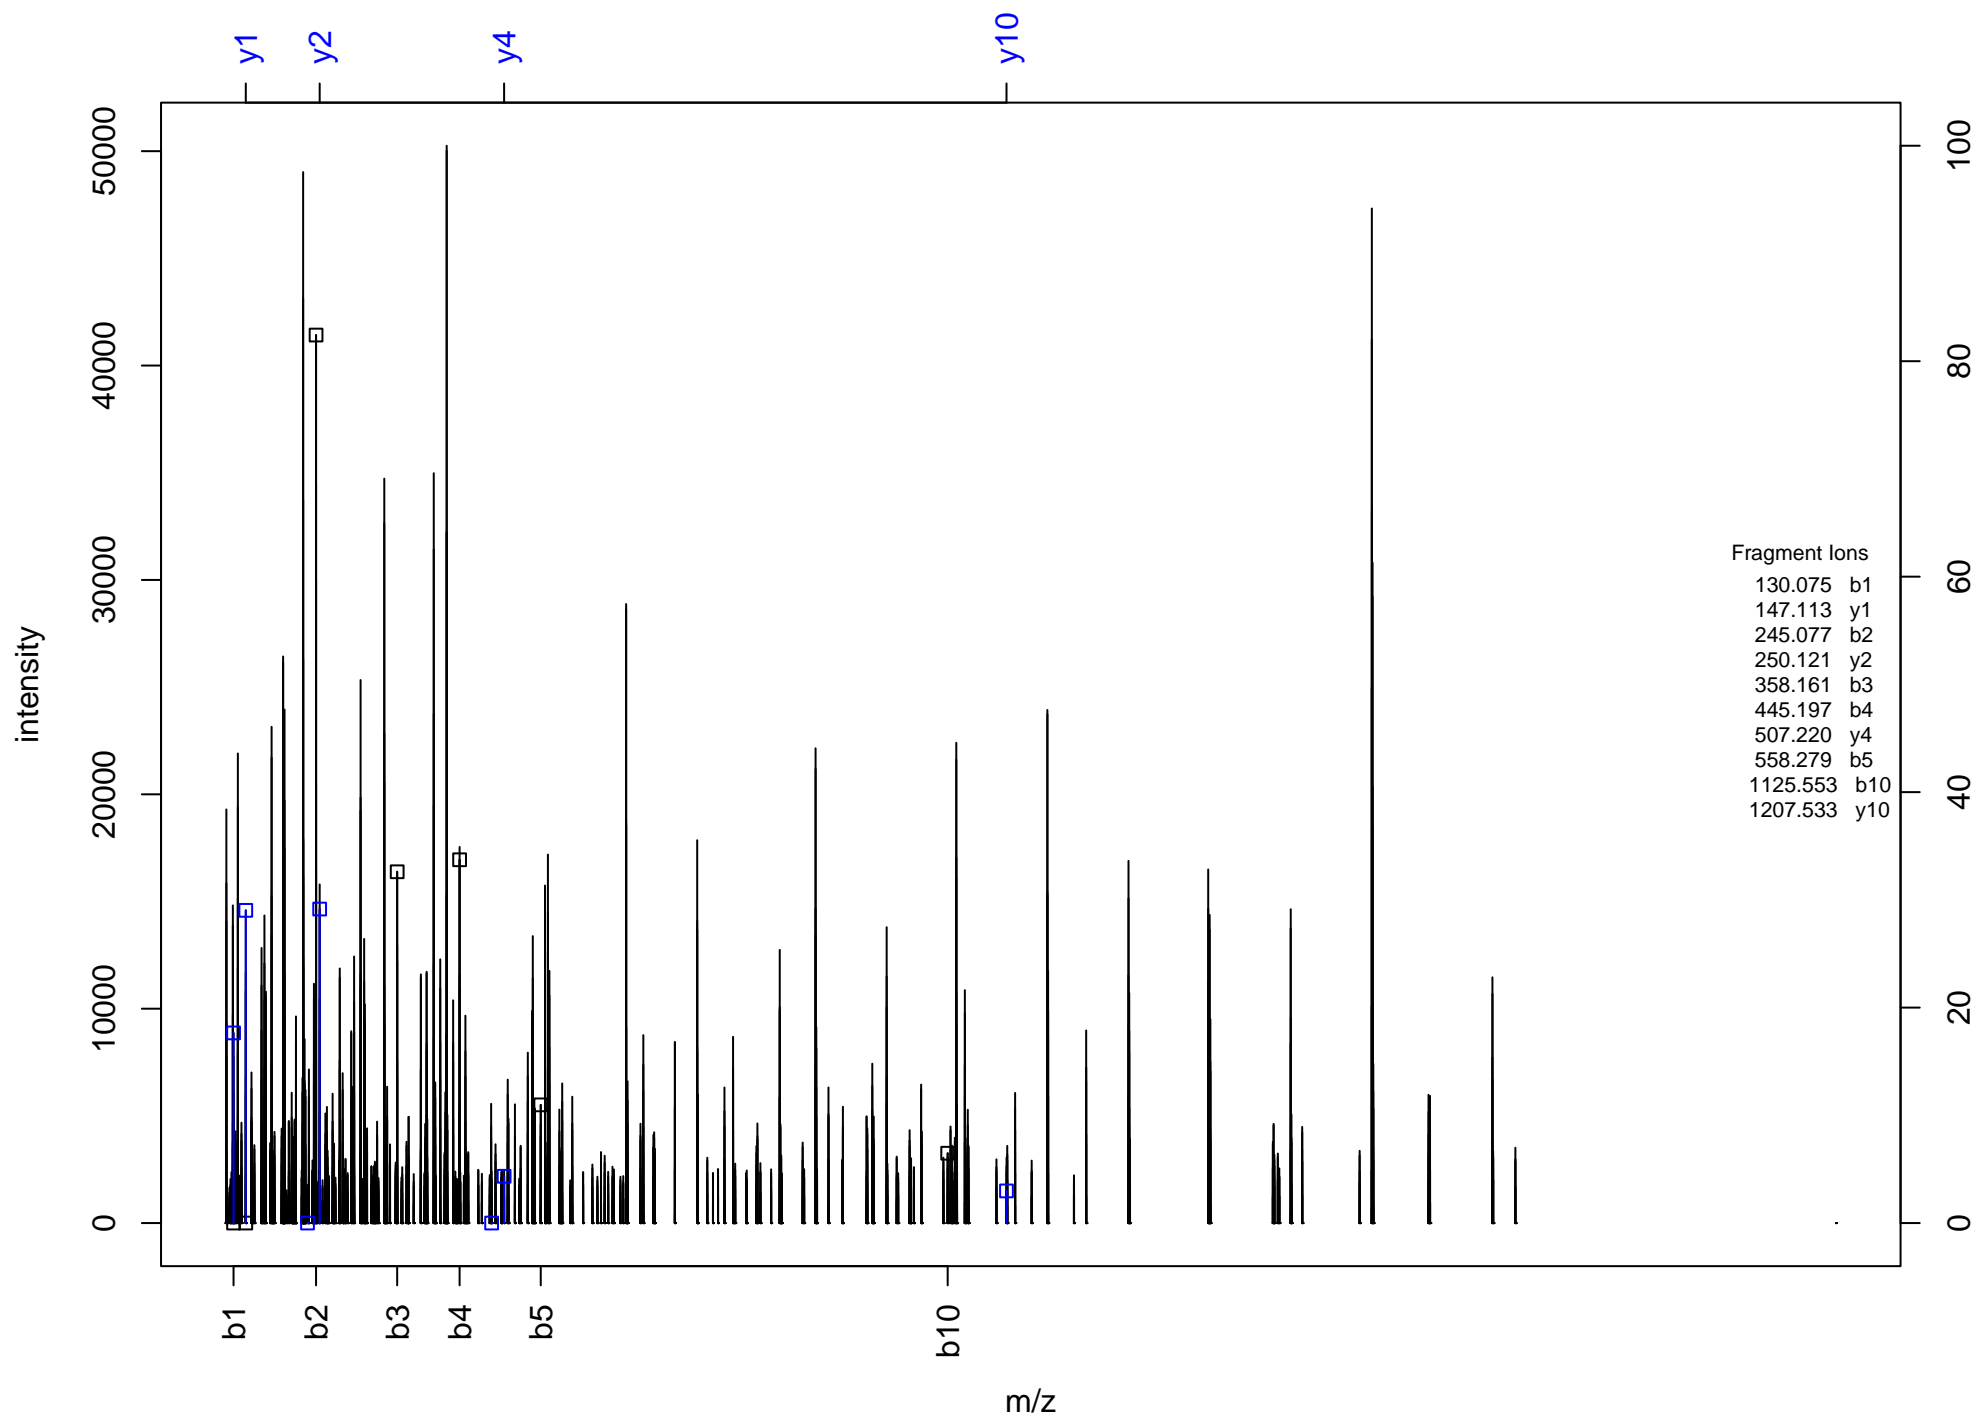

# N<sup>+</sup>DRN<sup>+</sup>NRWR

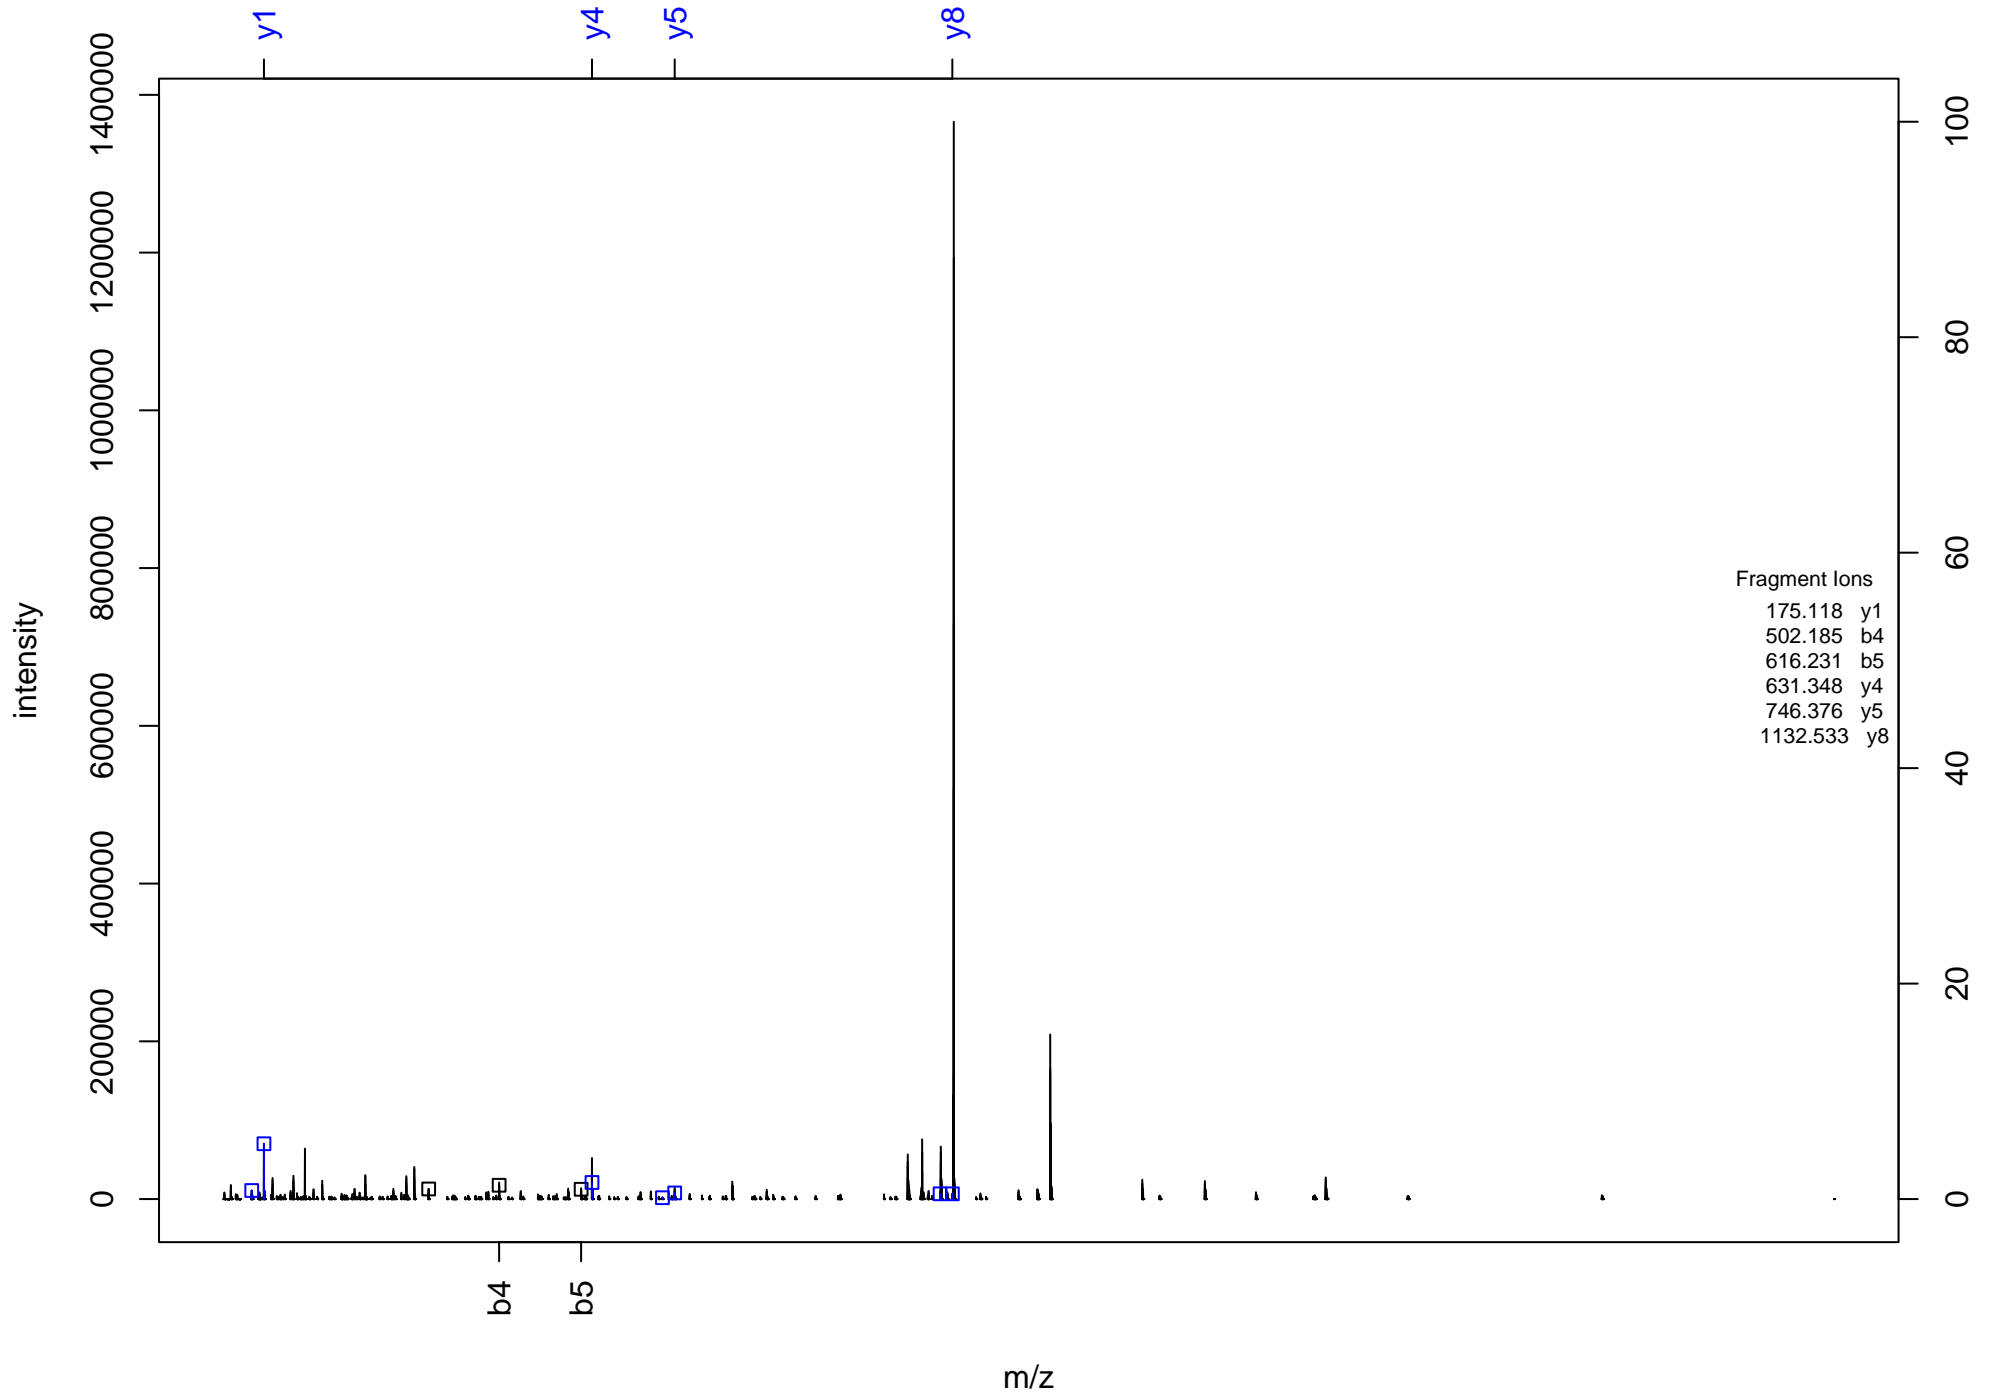



# SMLALLLGR

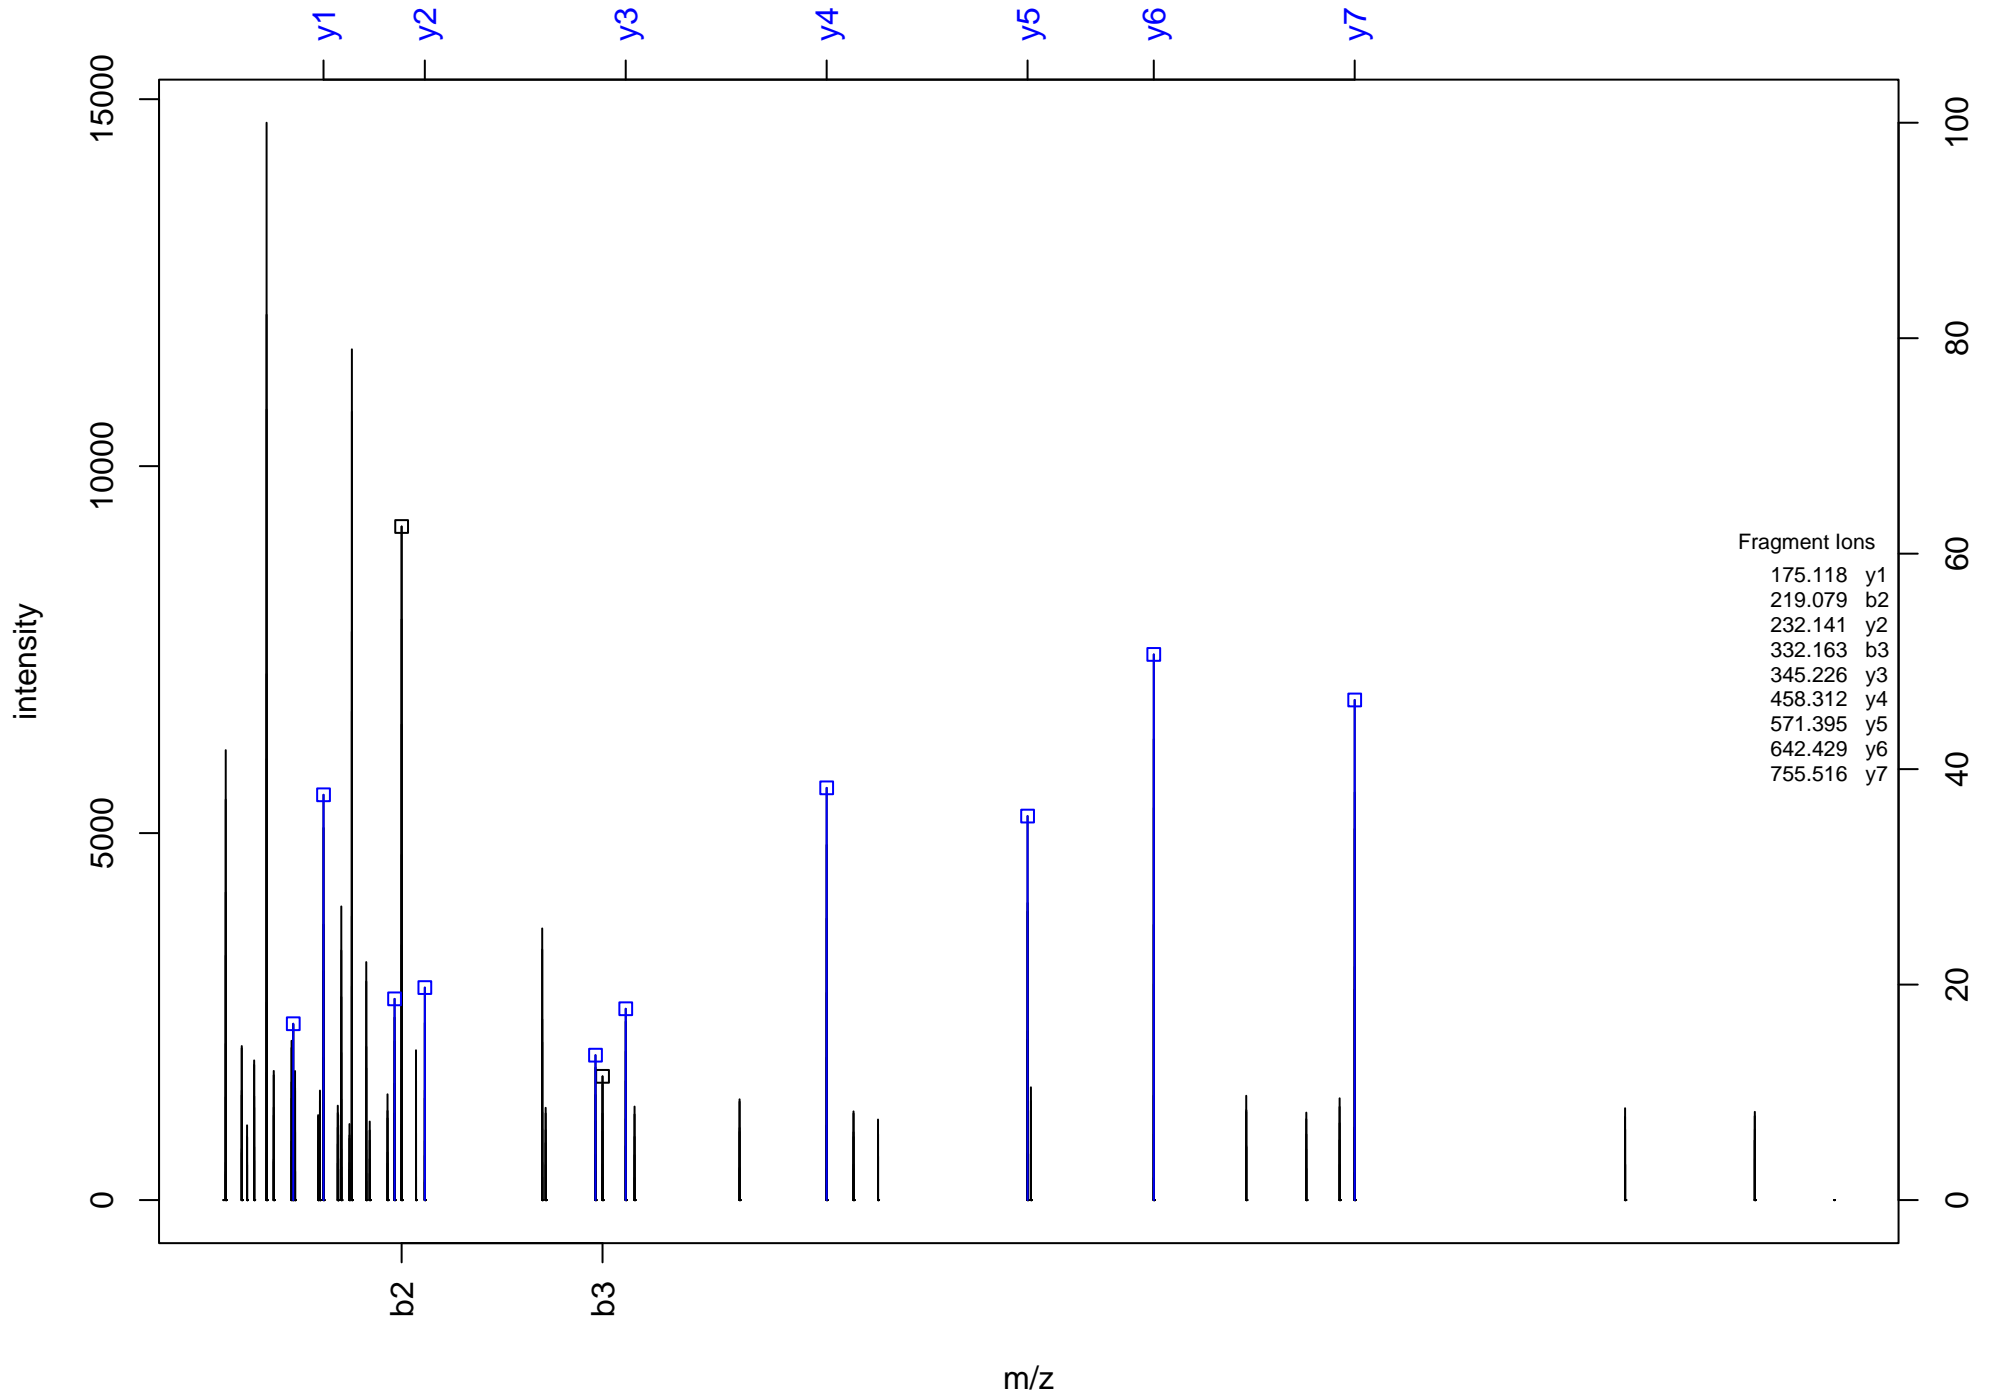

# LYEQILAENEK

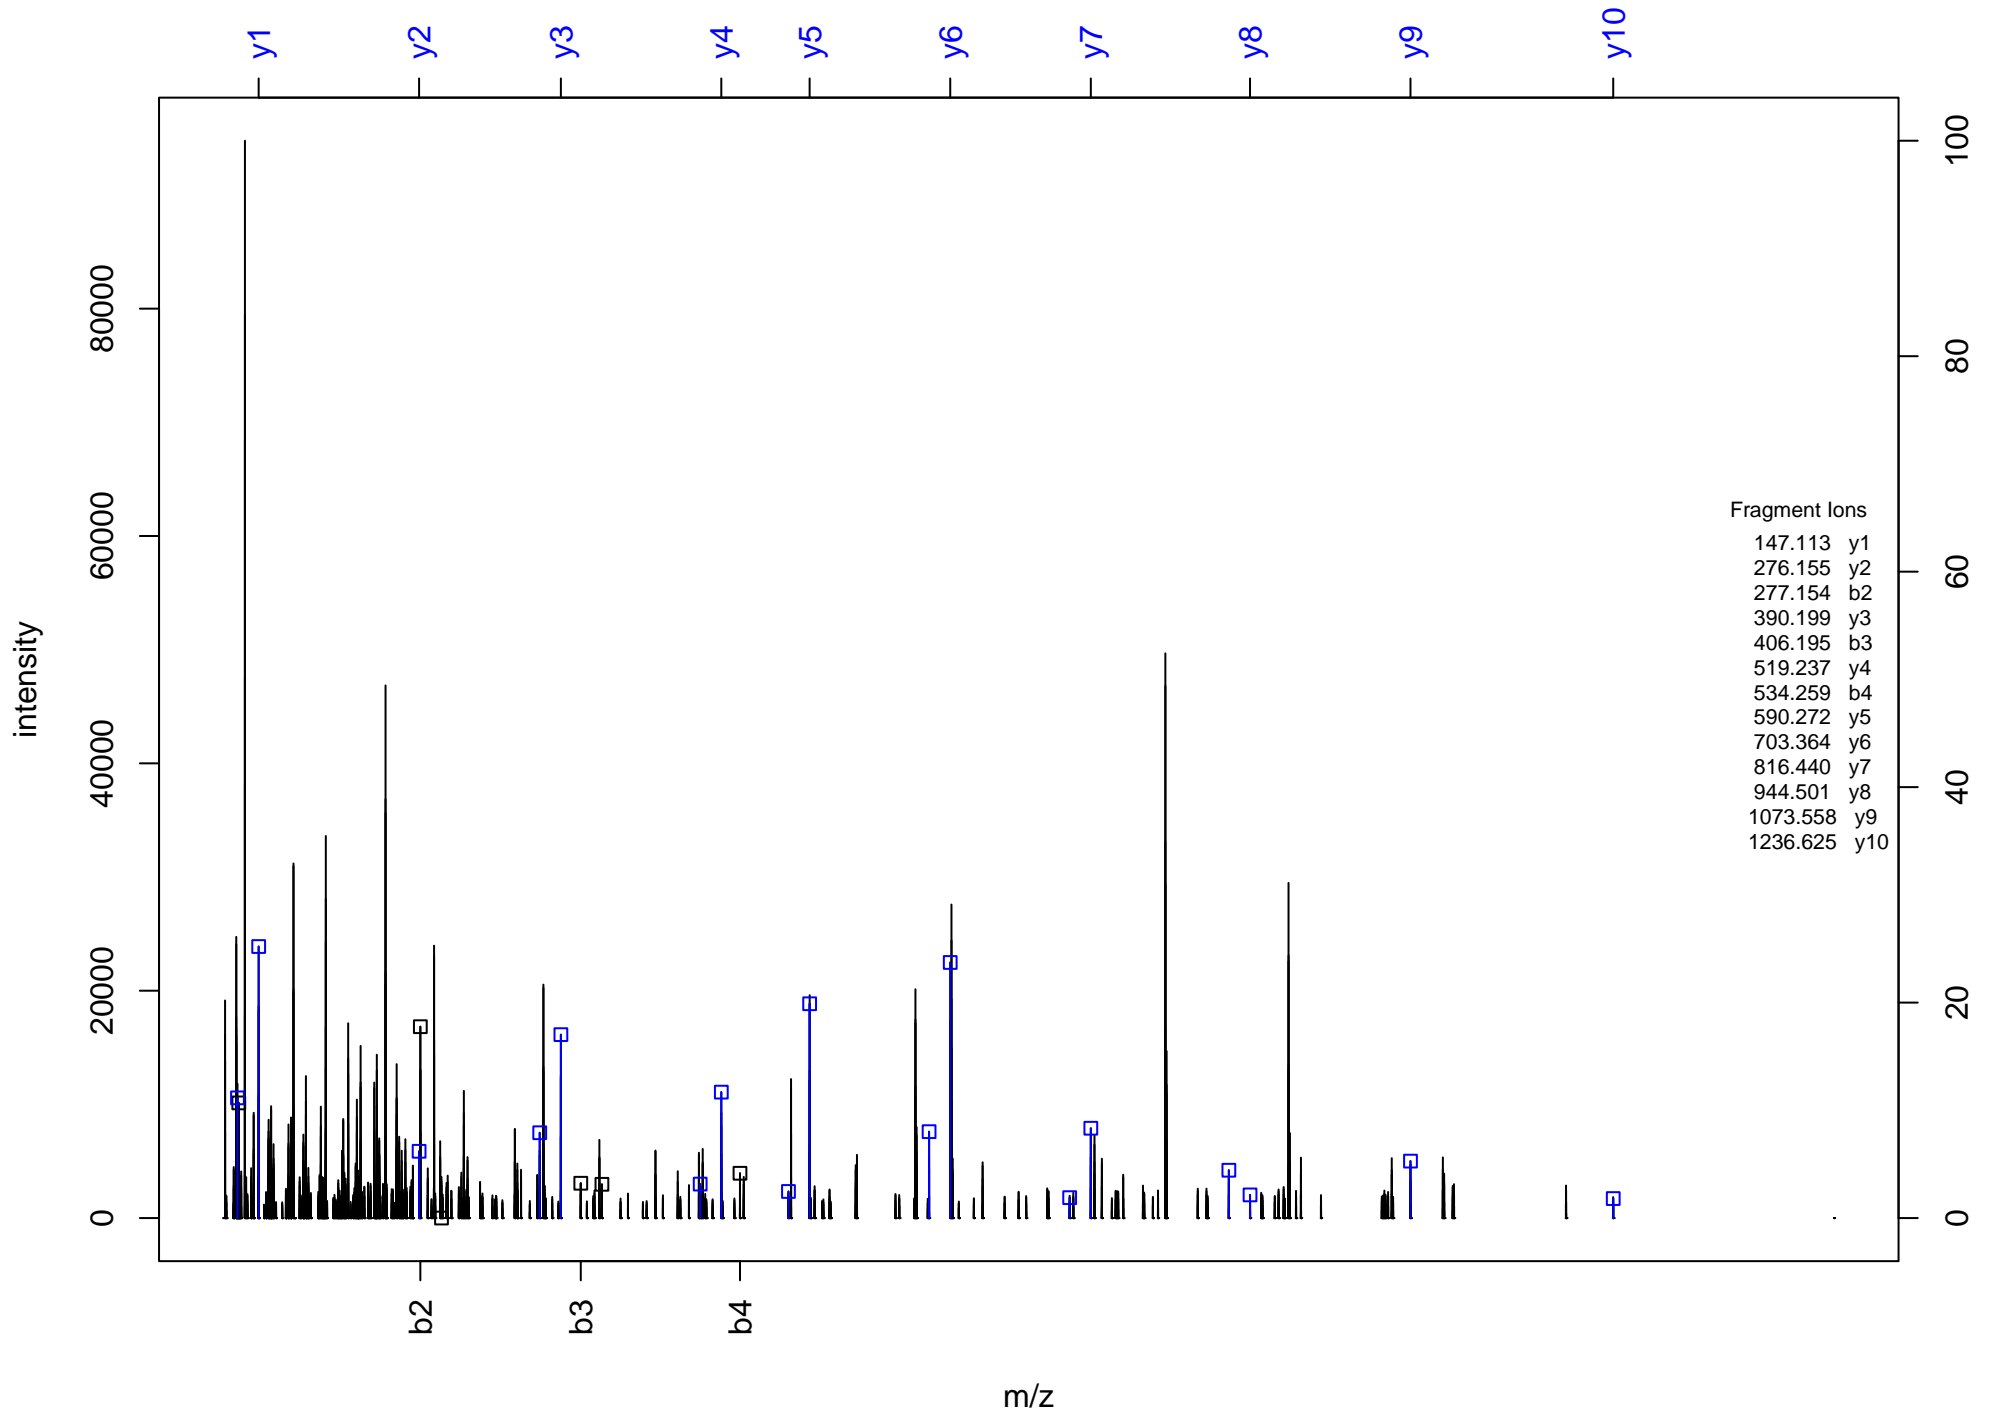

# DDLVDPTVQDDEGPPPK

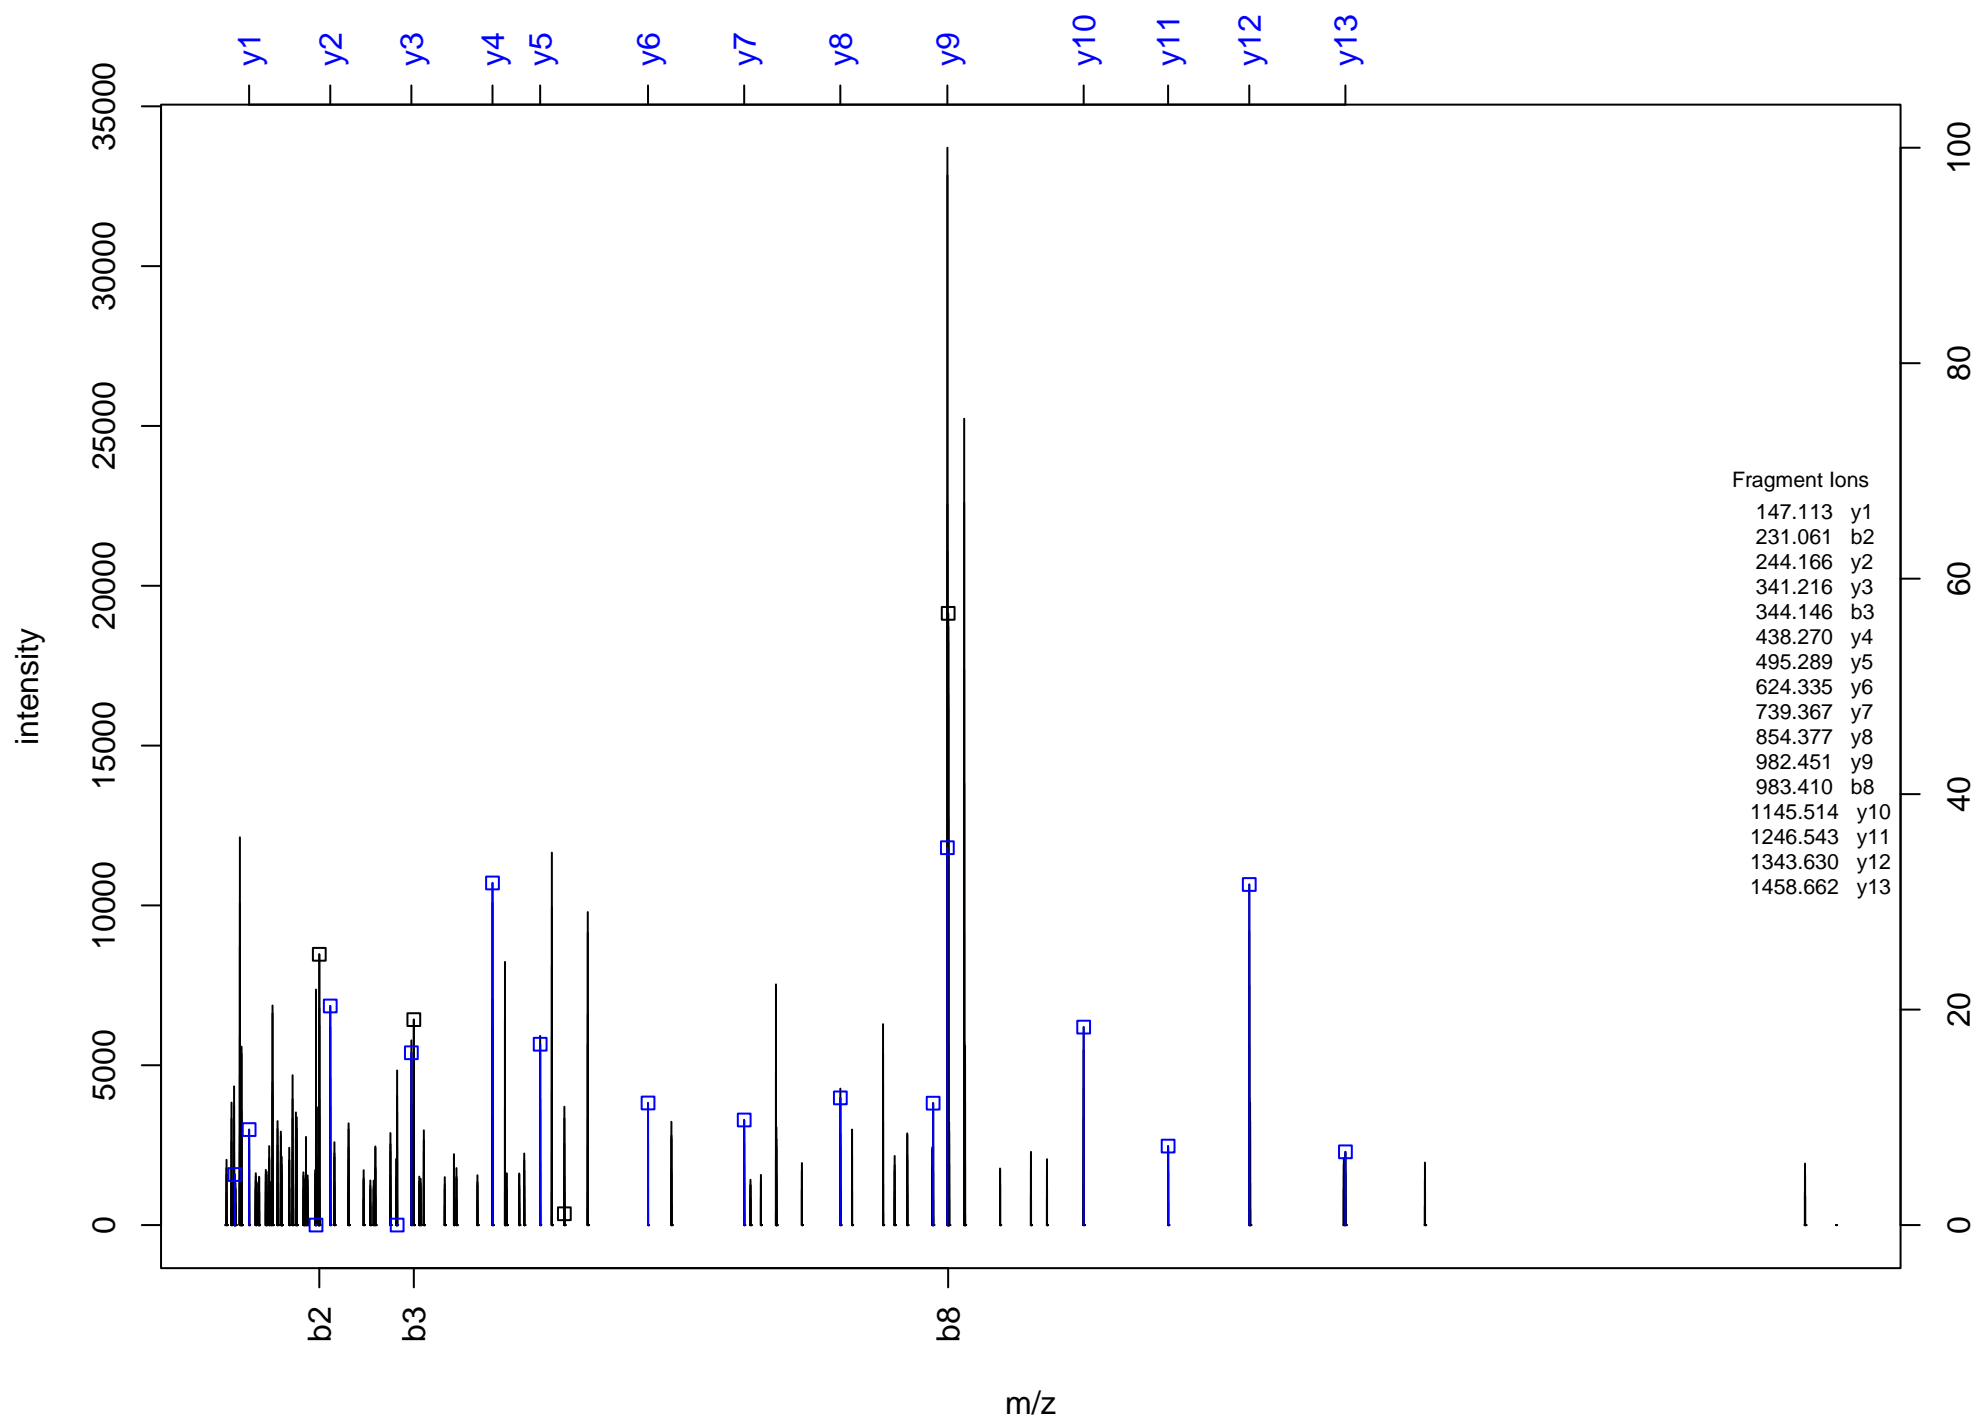

# ADEGHPSDPPQQAGETLQASGENVR

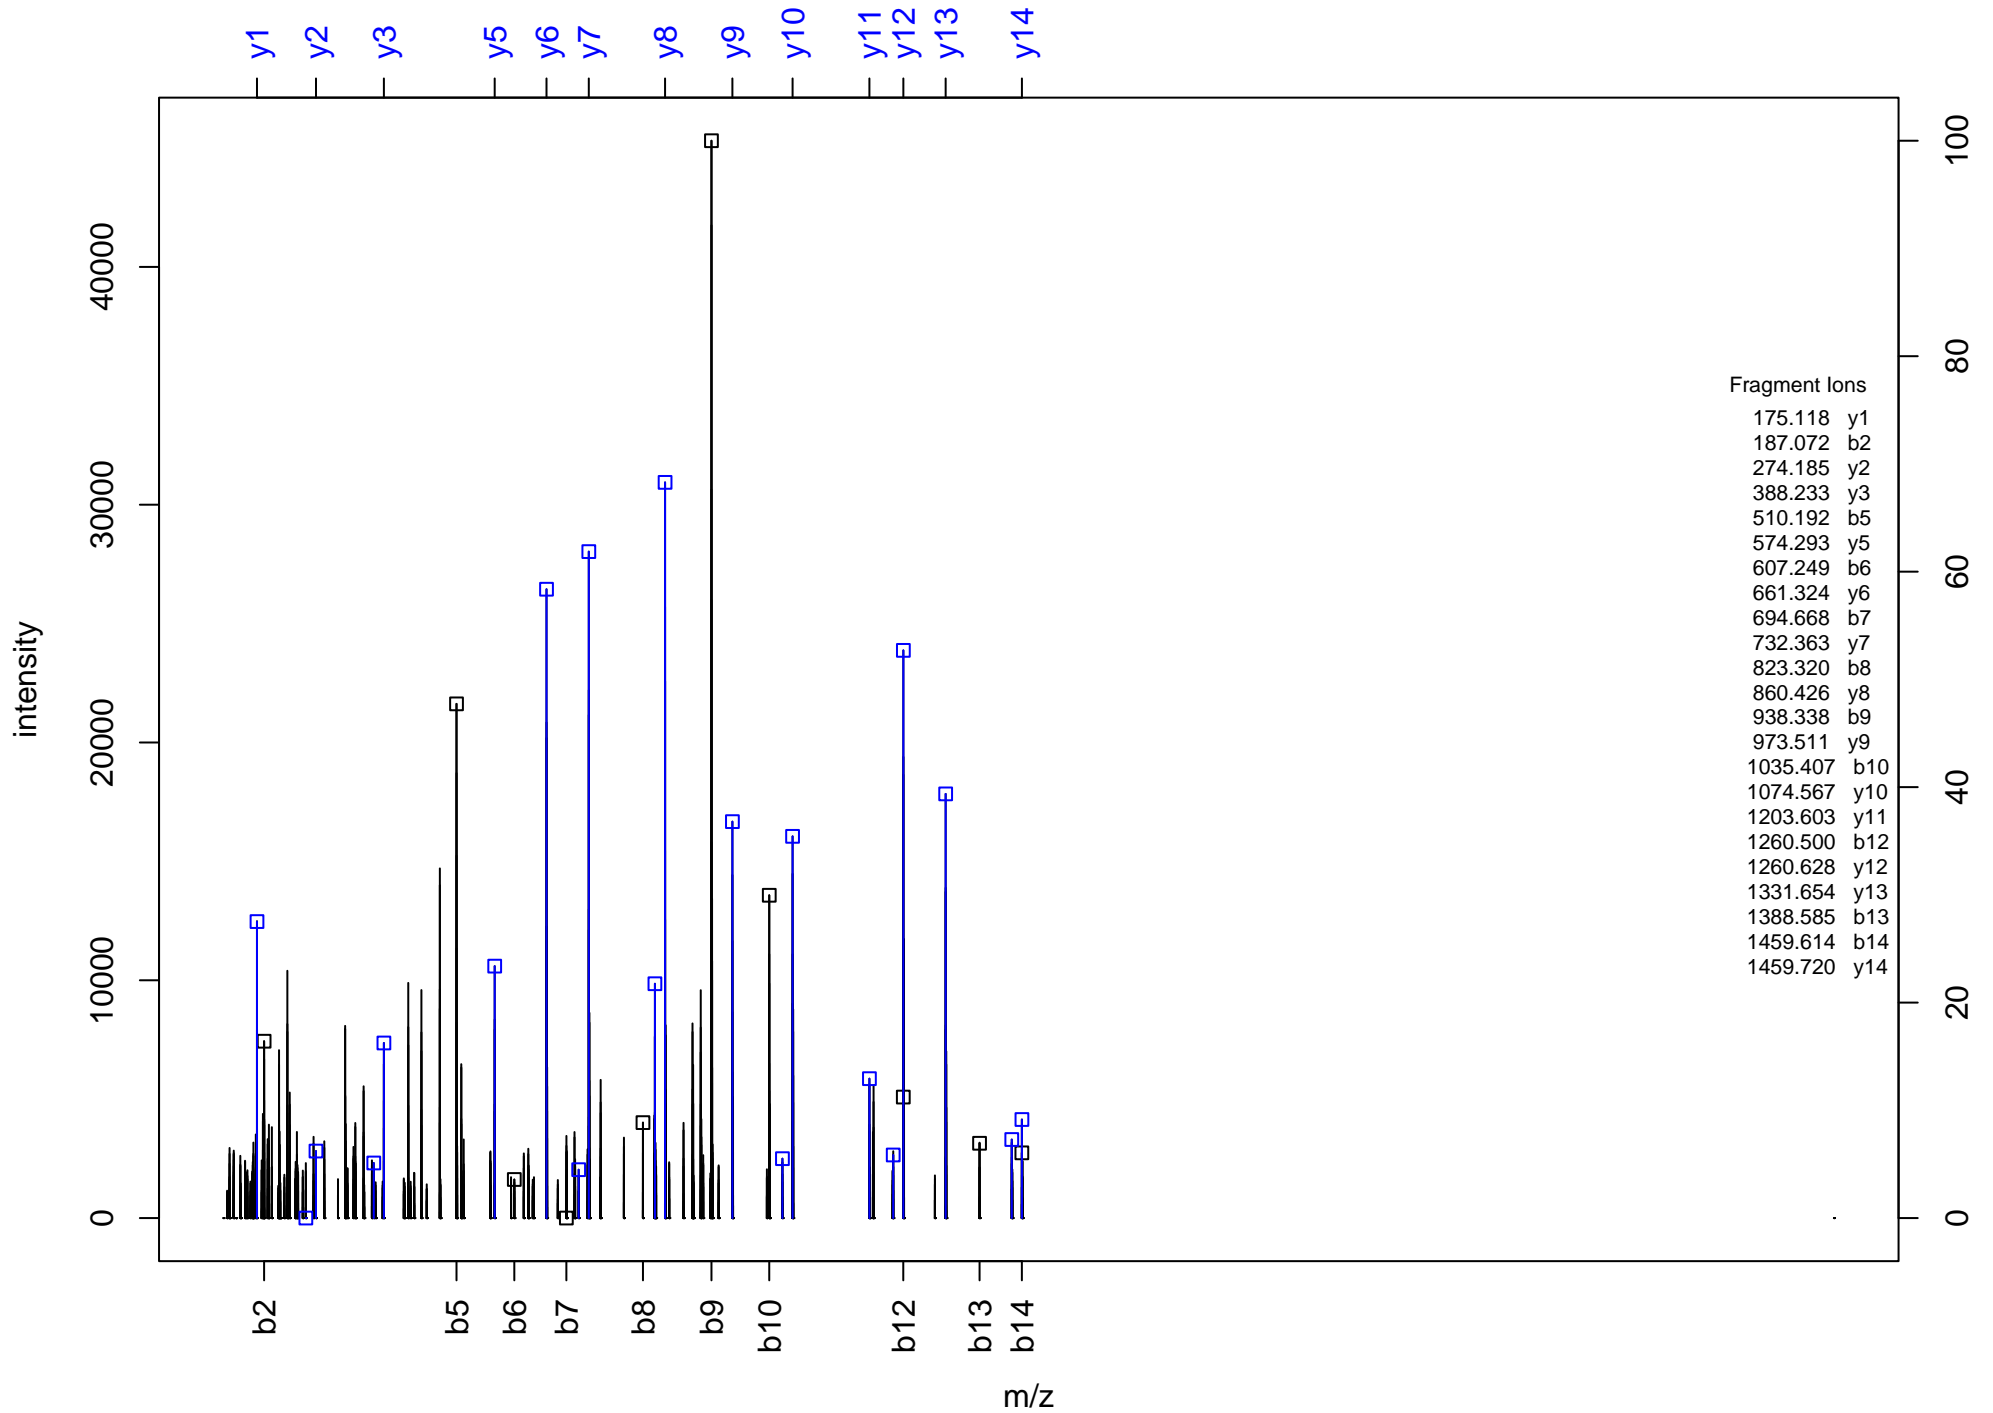

# KTTGHPSQGTLASSEQ^M\*Q^EHTR

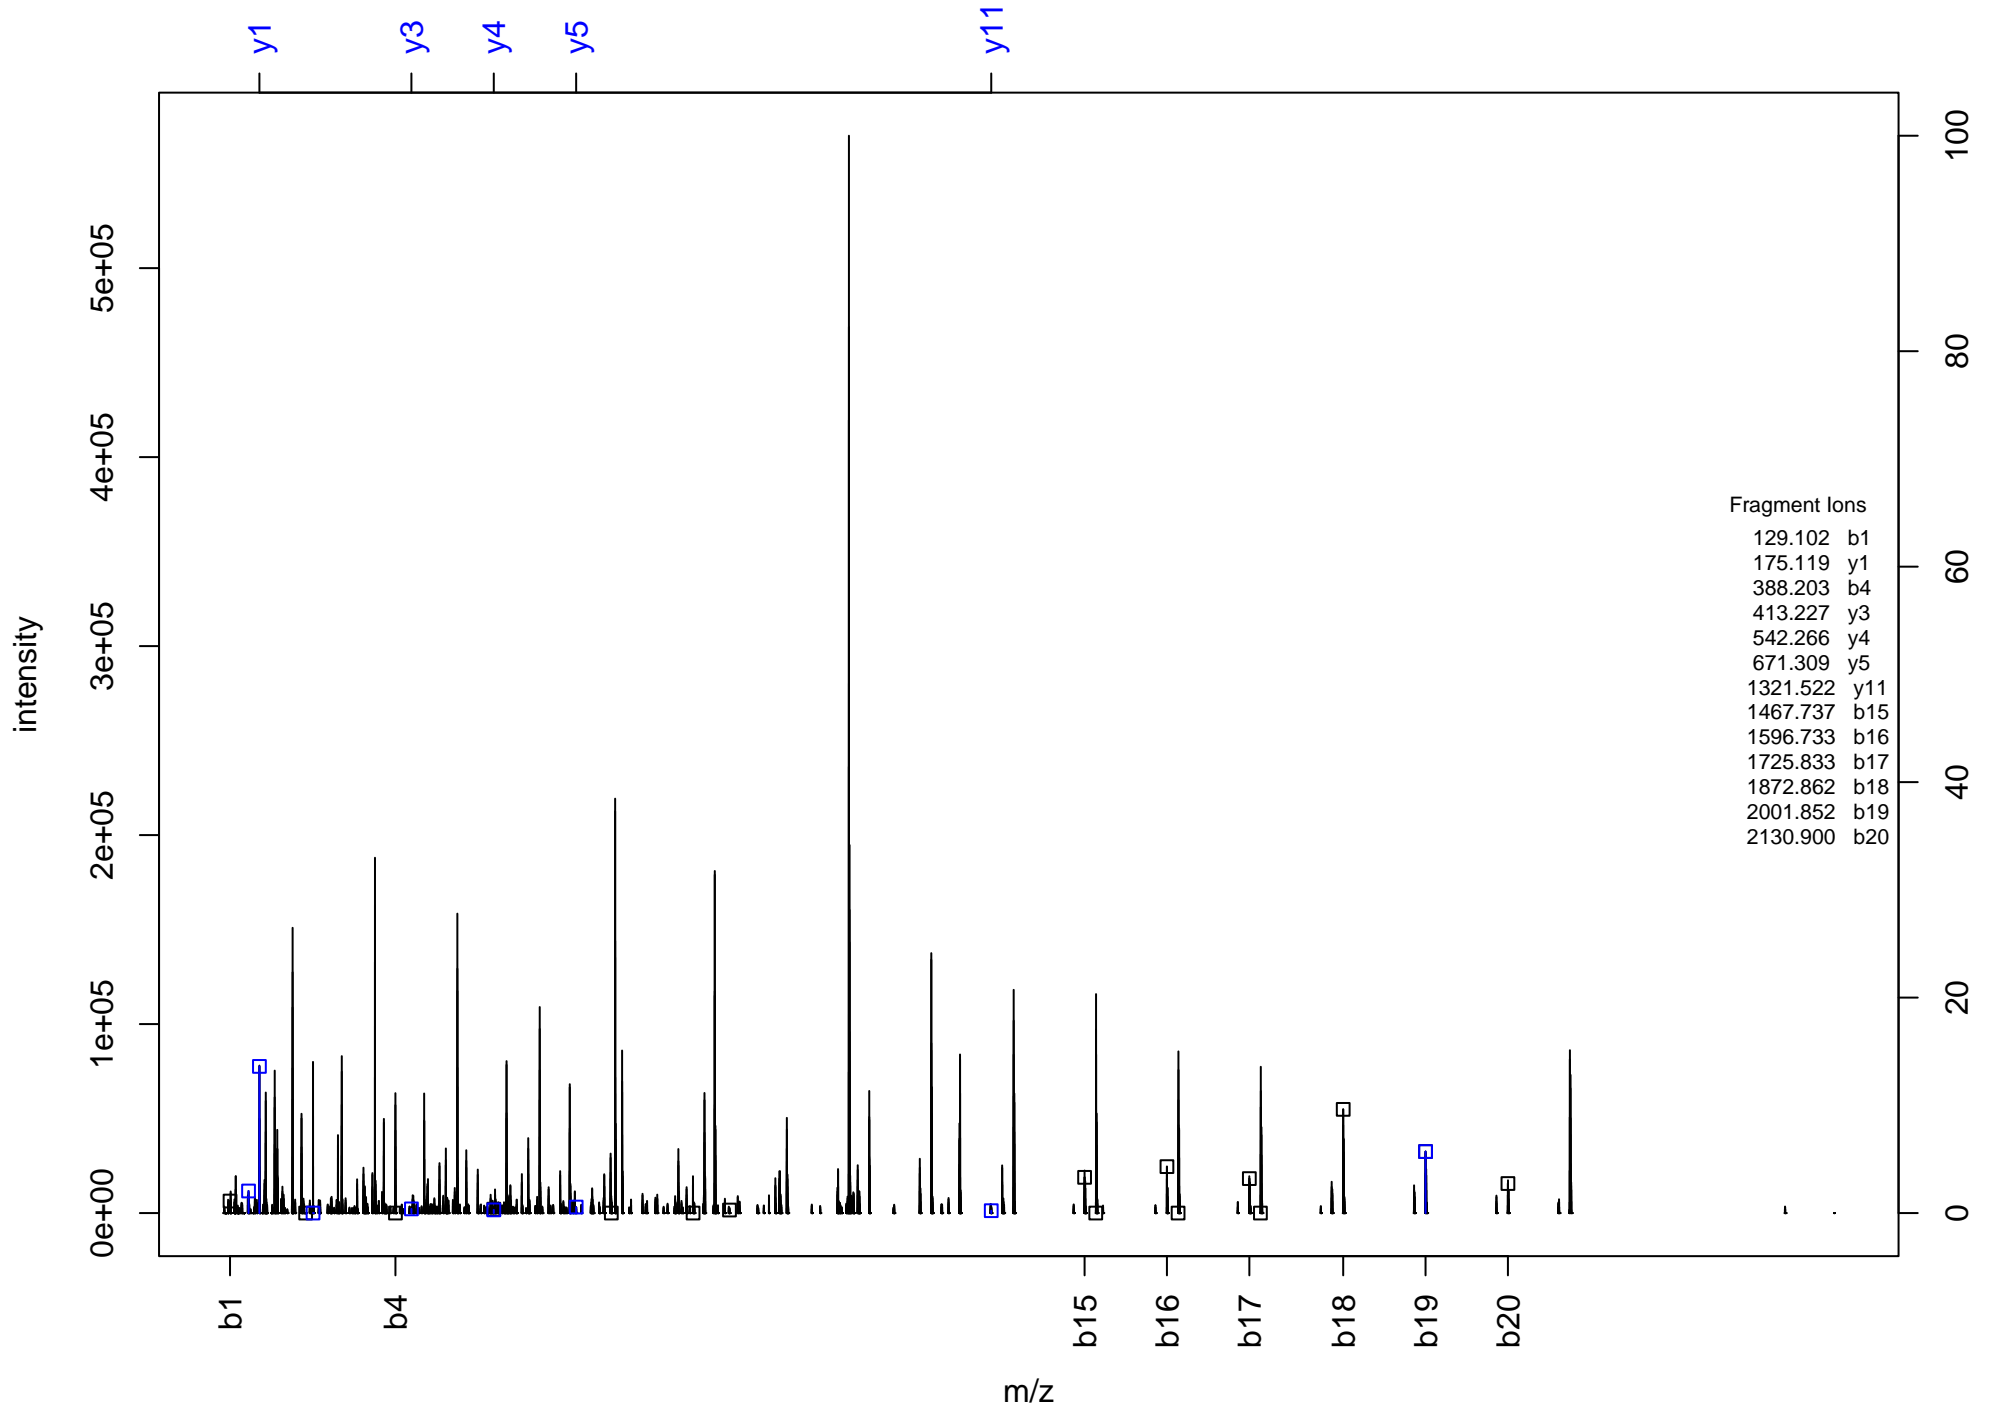

# MLPQ<sup>+</sup>ATQ<sup>+</sup>NRSQ<sup>+</sup>PPTRN<sup>+</sup>SSN<sup>+</sup>MEK

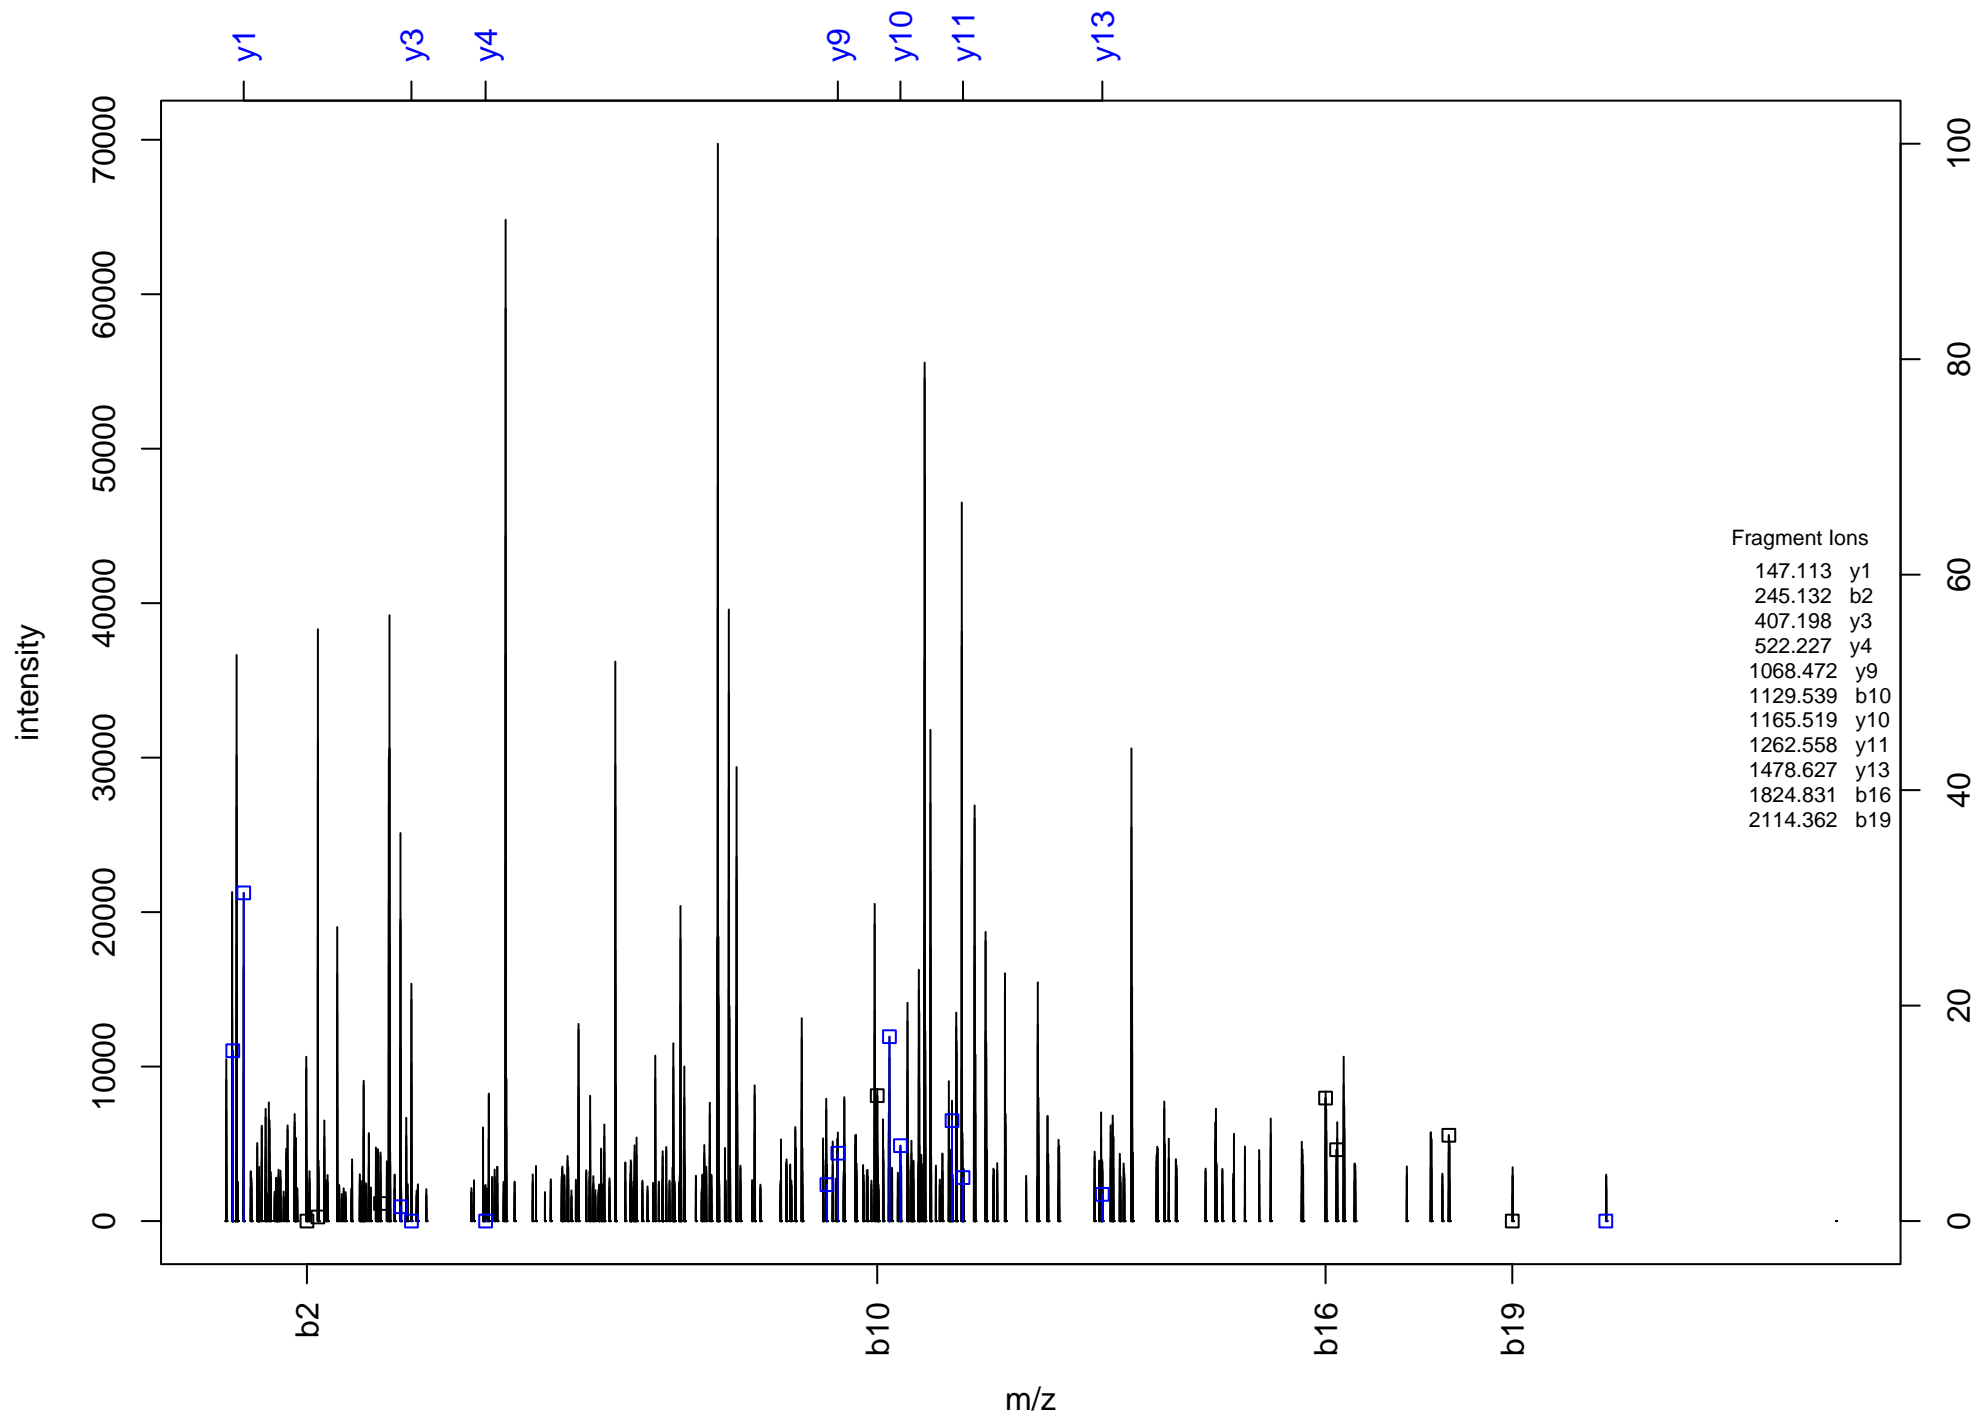

# DILYVFQGIDGK

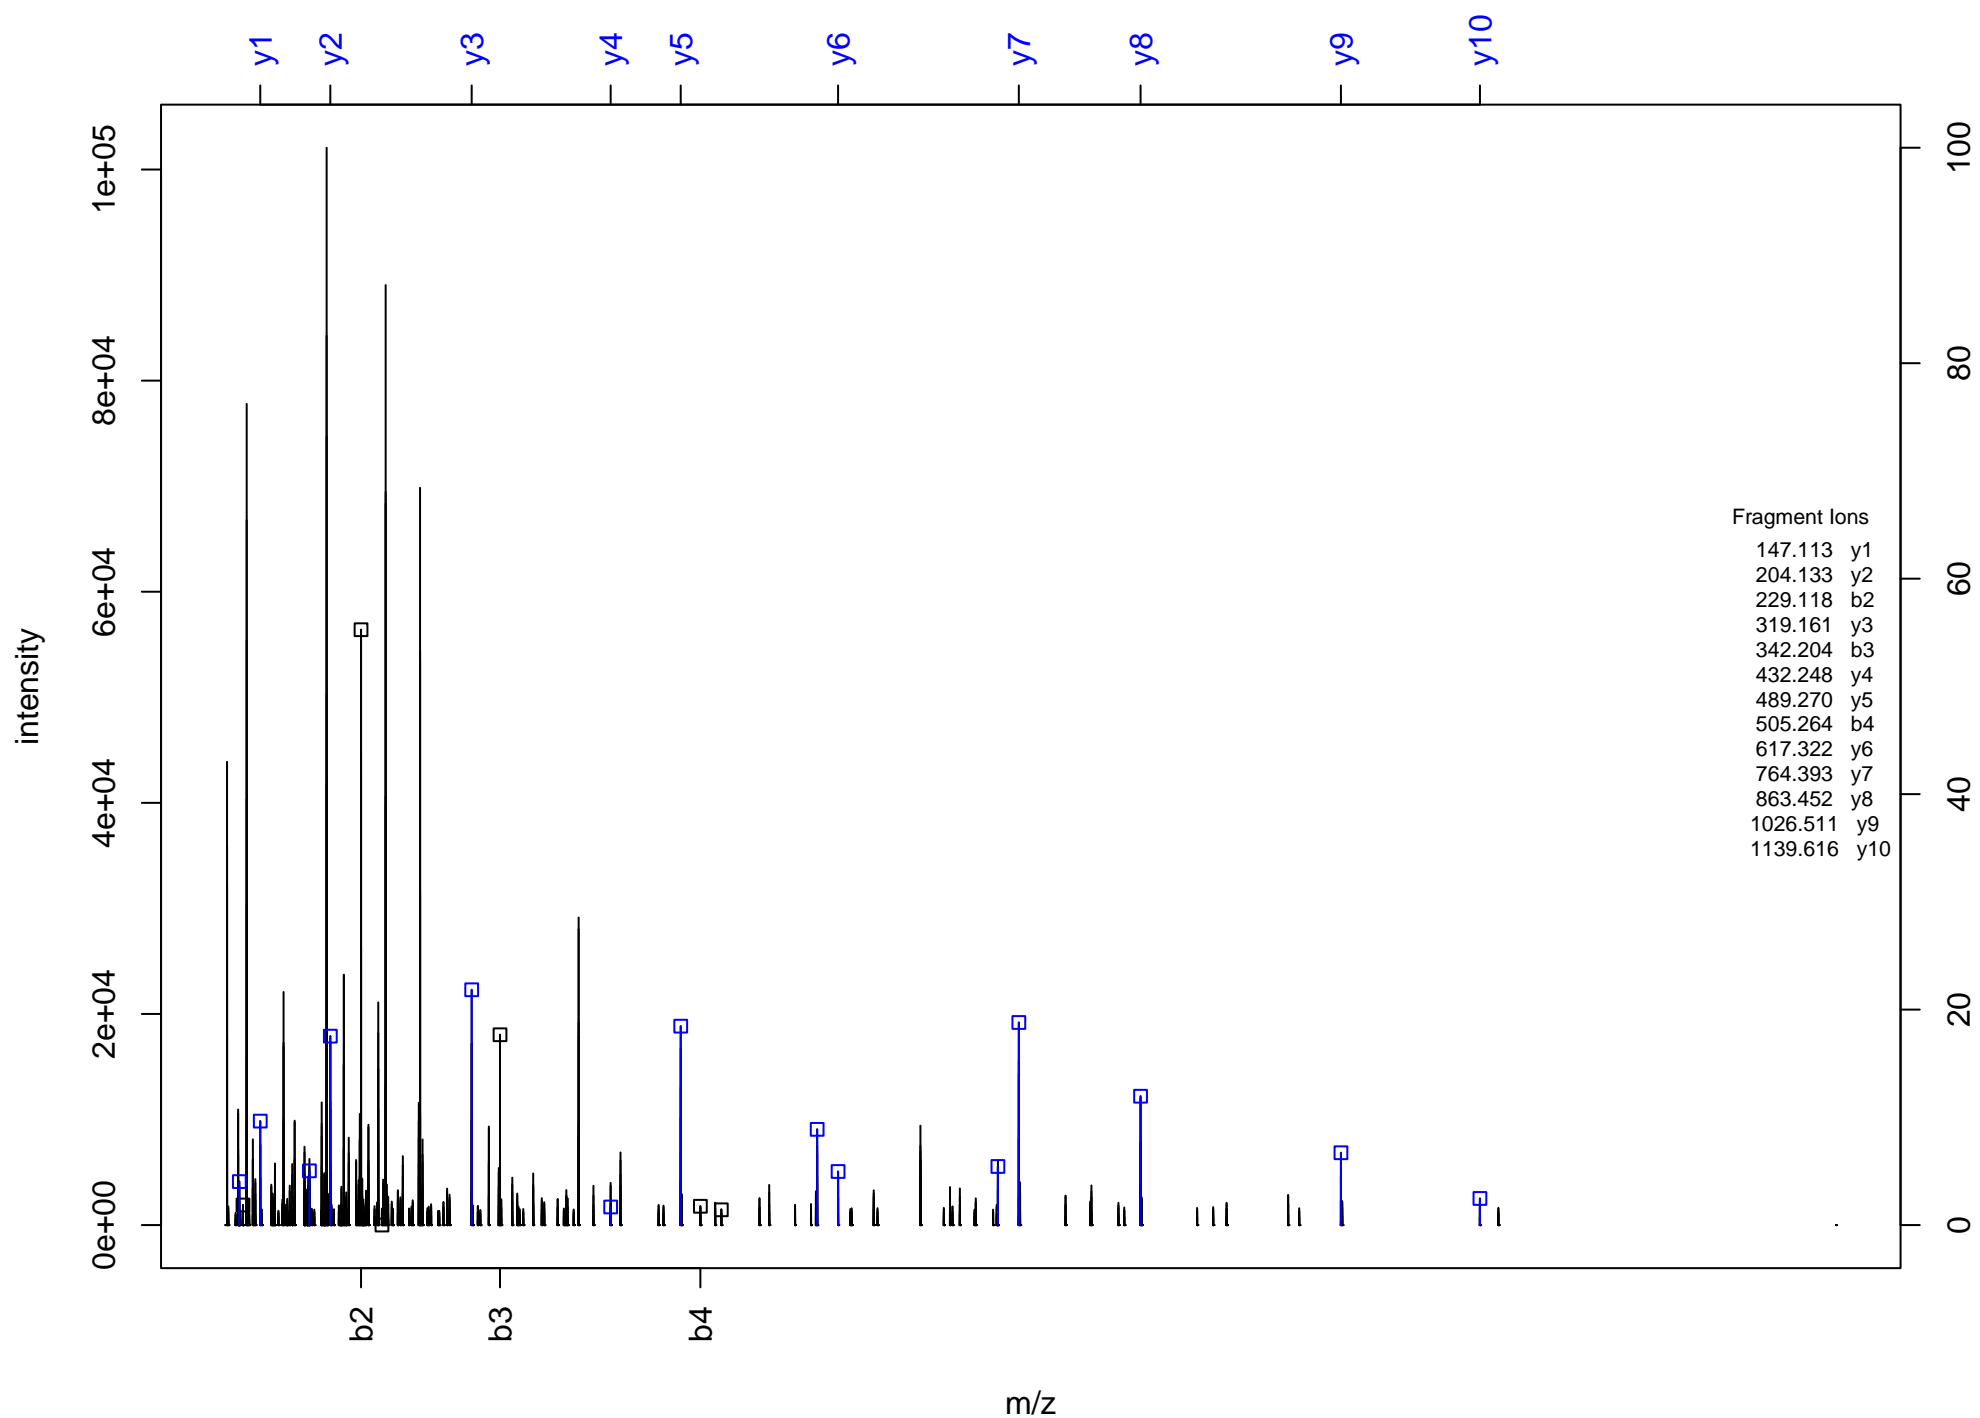

# VTTVVATPGQGPD RPQEVS YTDTK

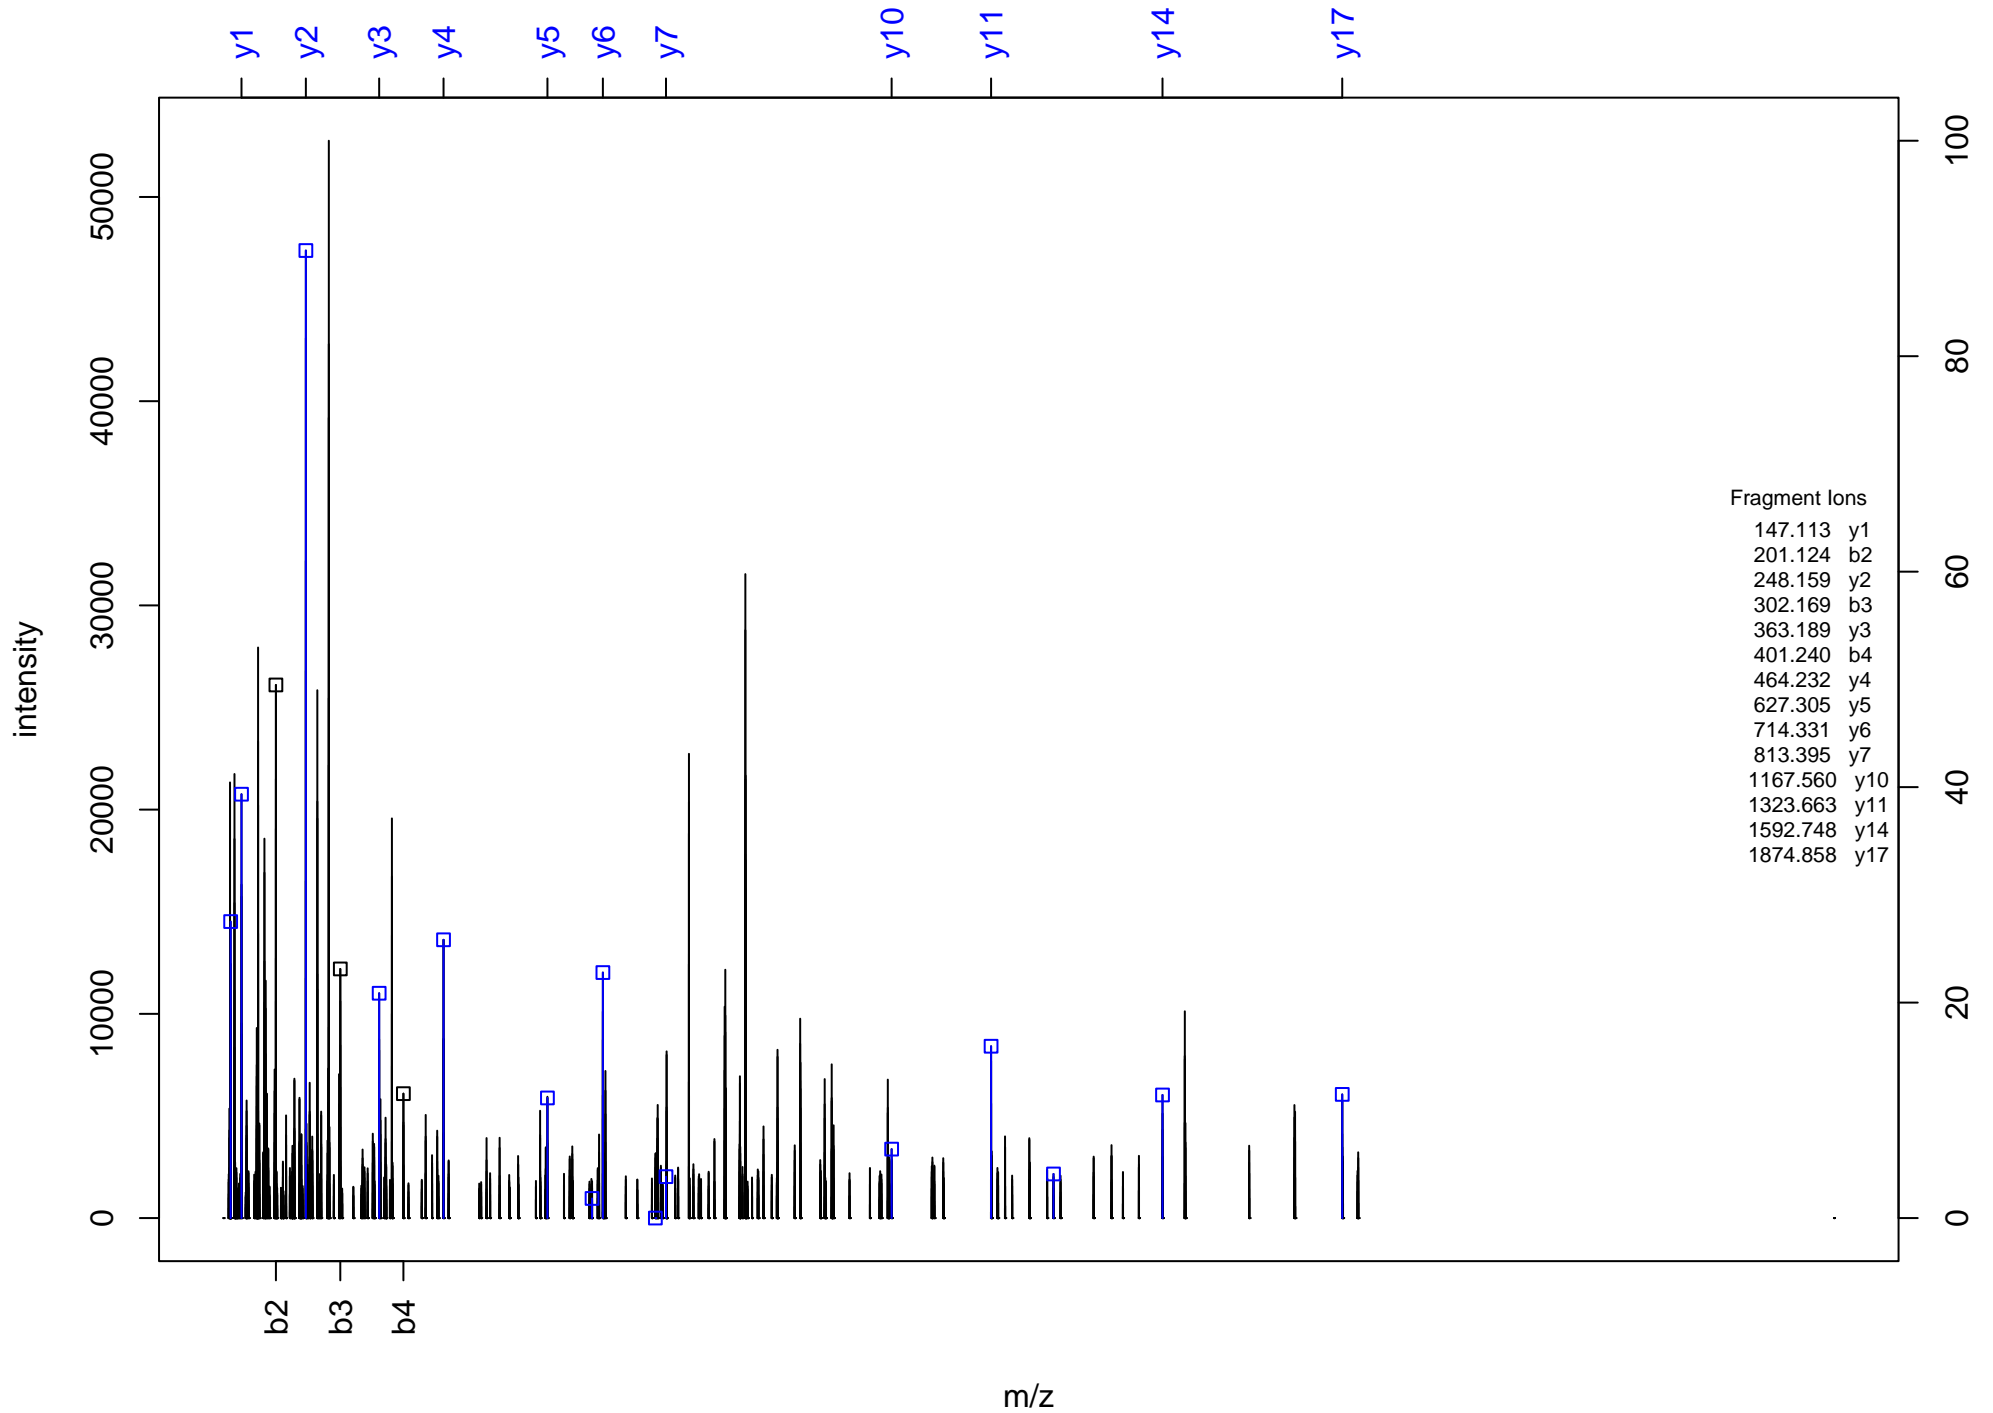



# LFVEQLEEFMTK

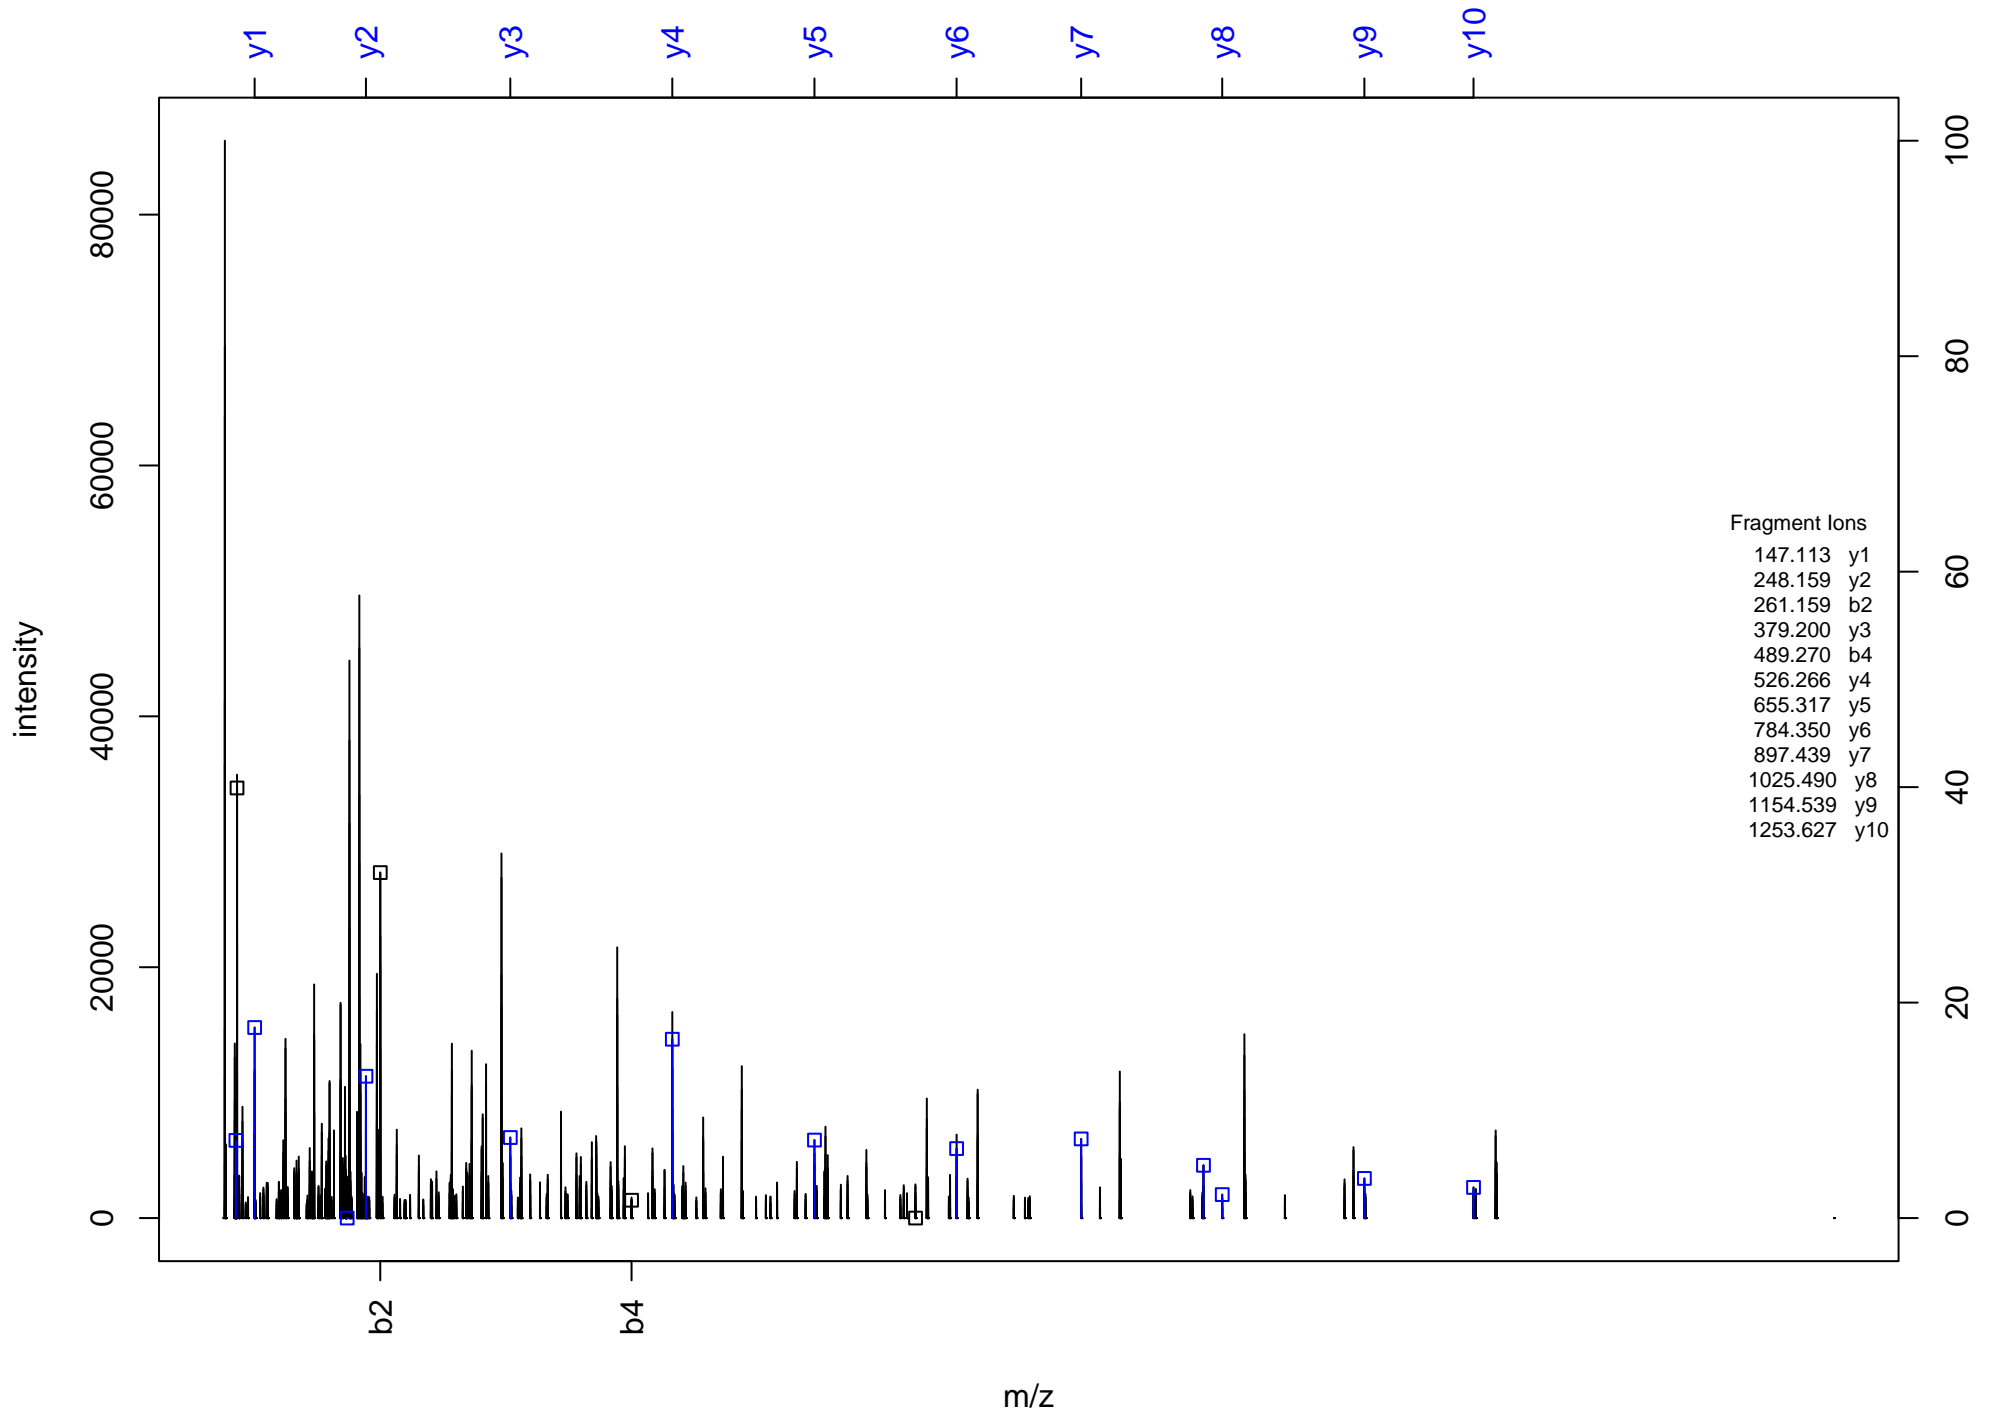

# ALFDFNGNDEEDLPFK

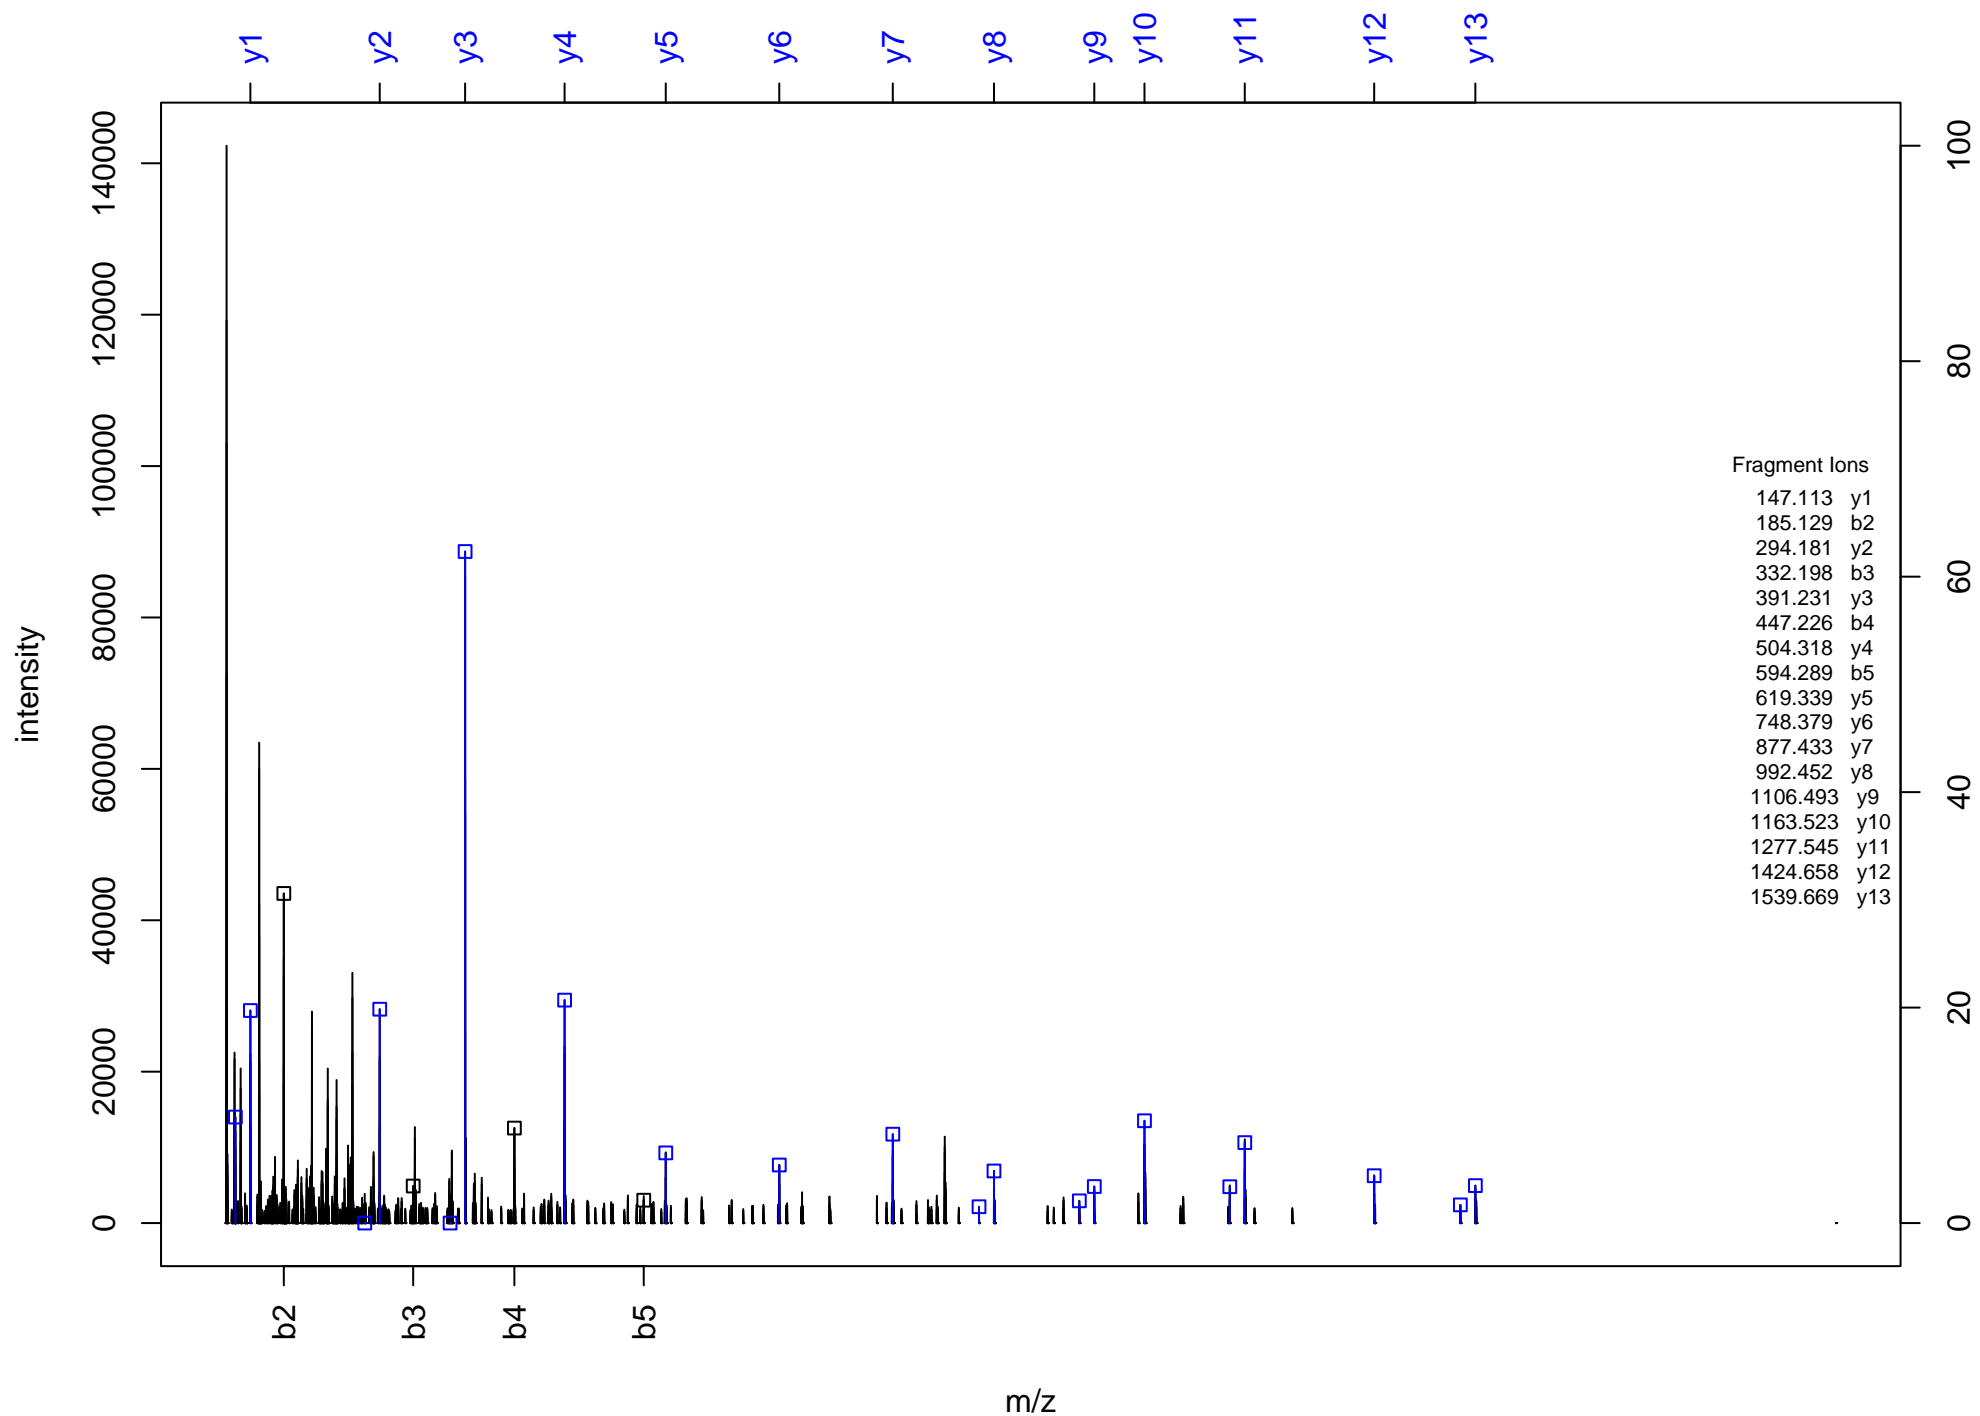

# FLVPDHSVNMSELIK

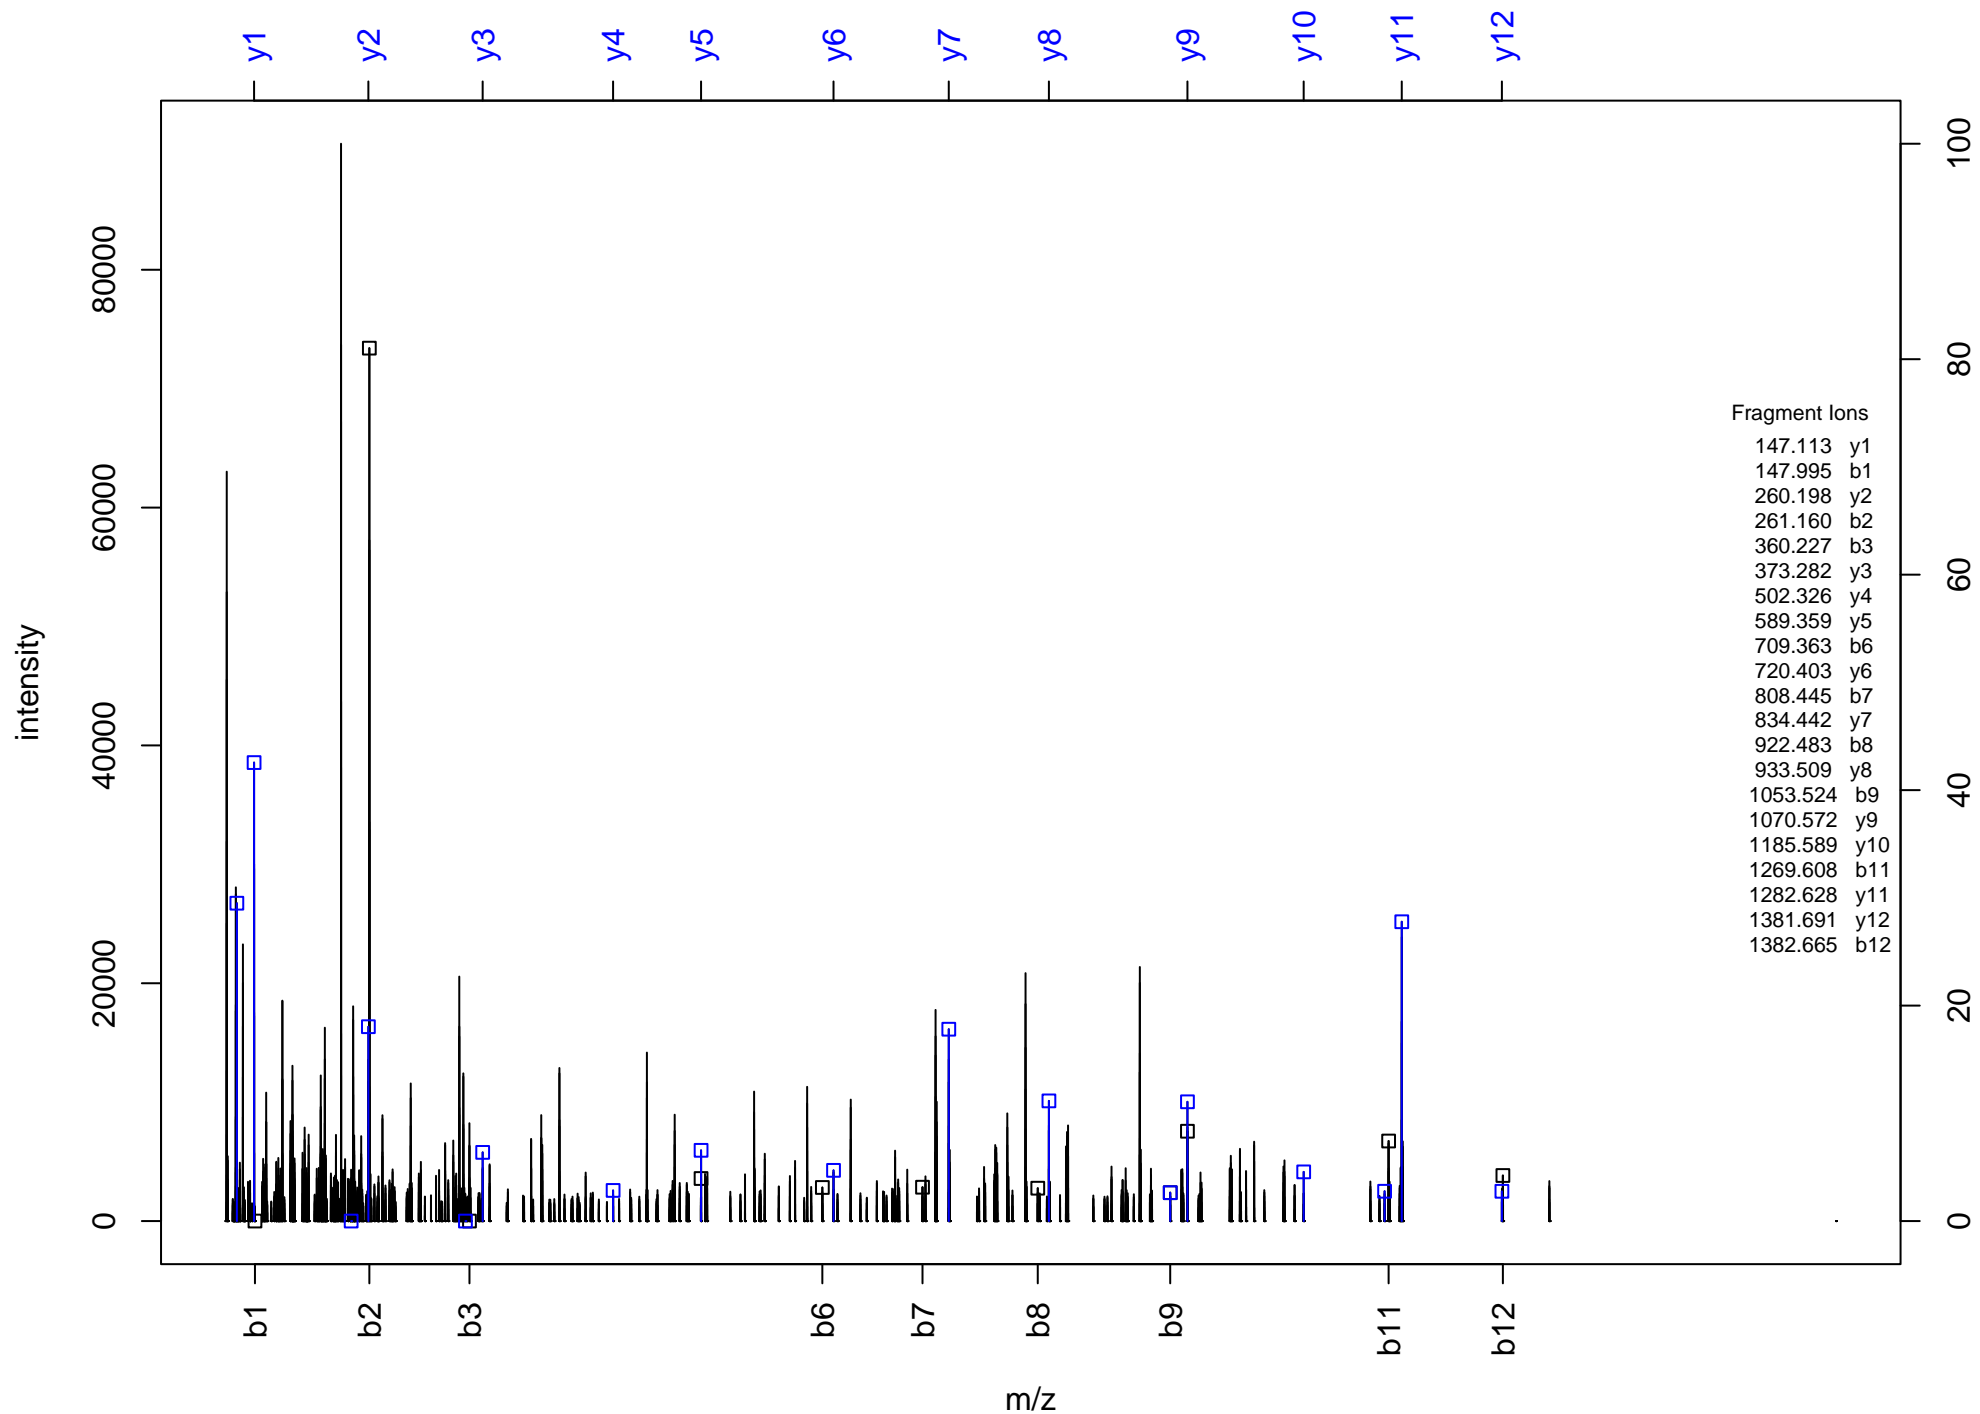

# IPLIVCGDFNAEPTEEVYK

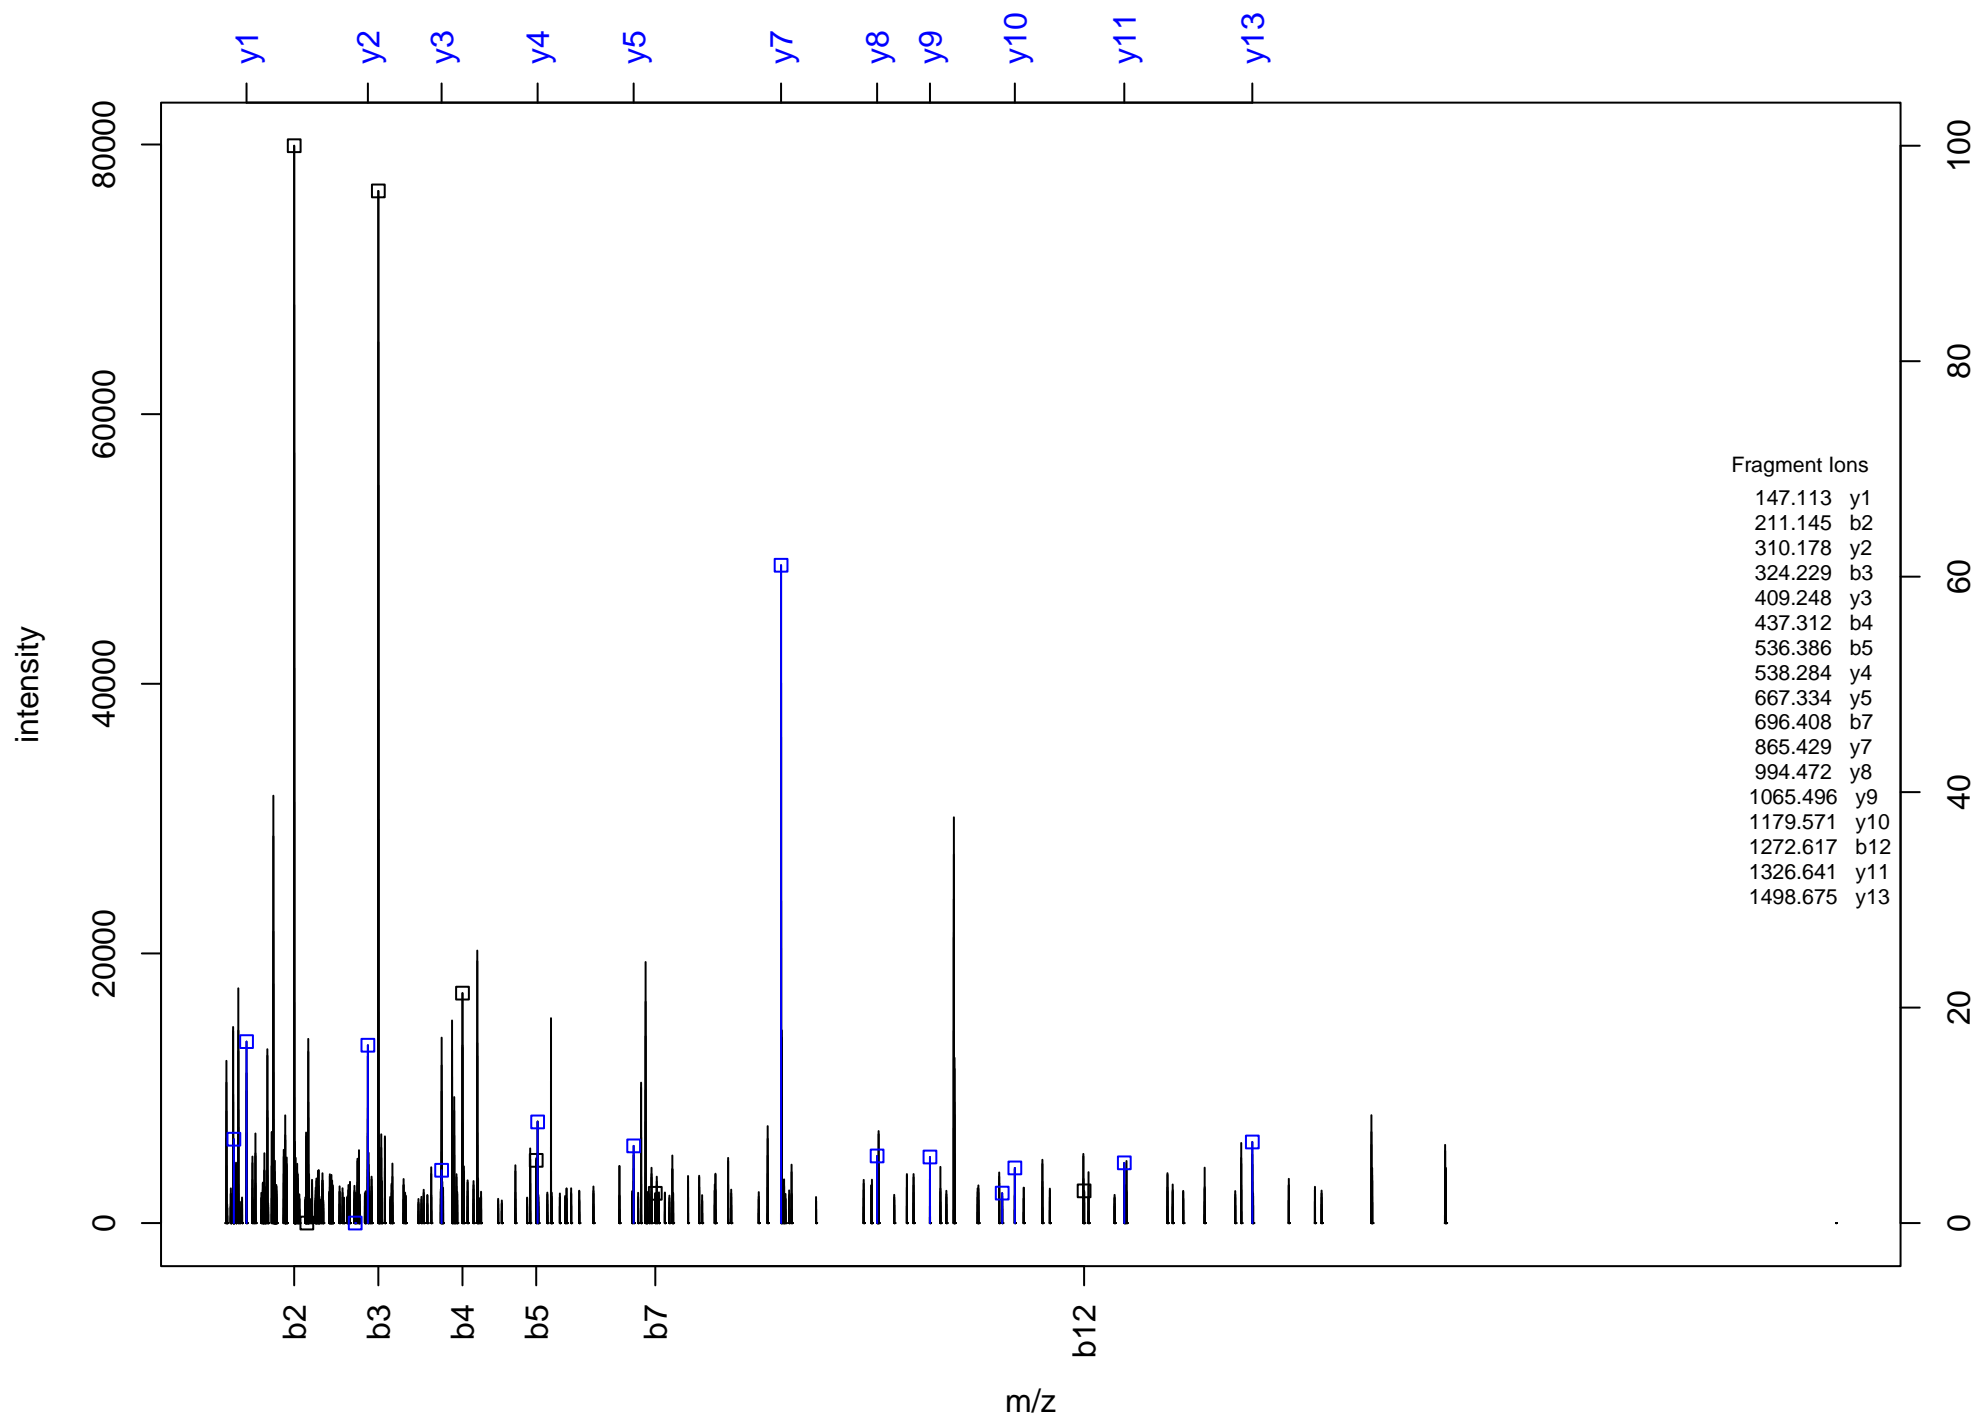

# (Ac)TELQSALLR

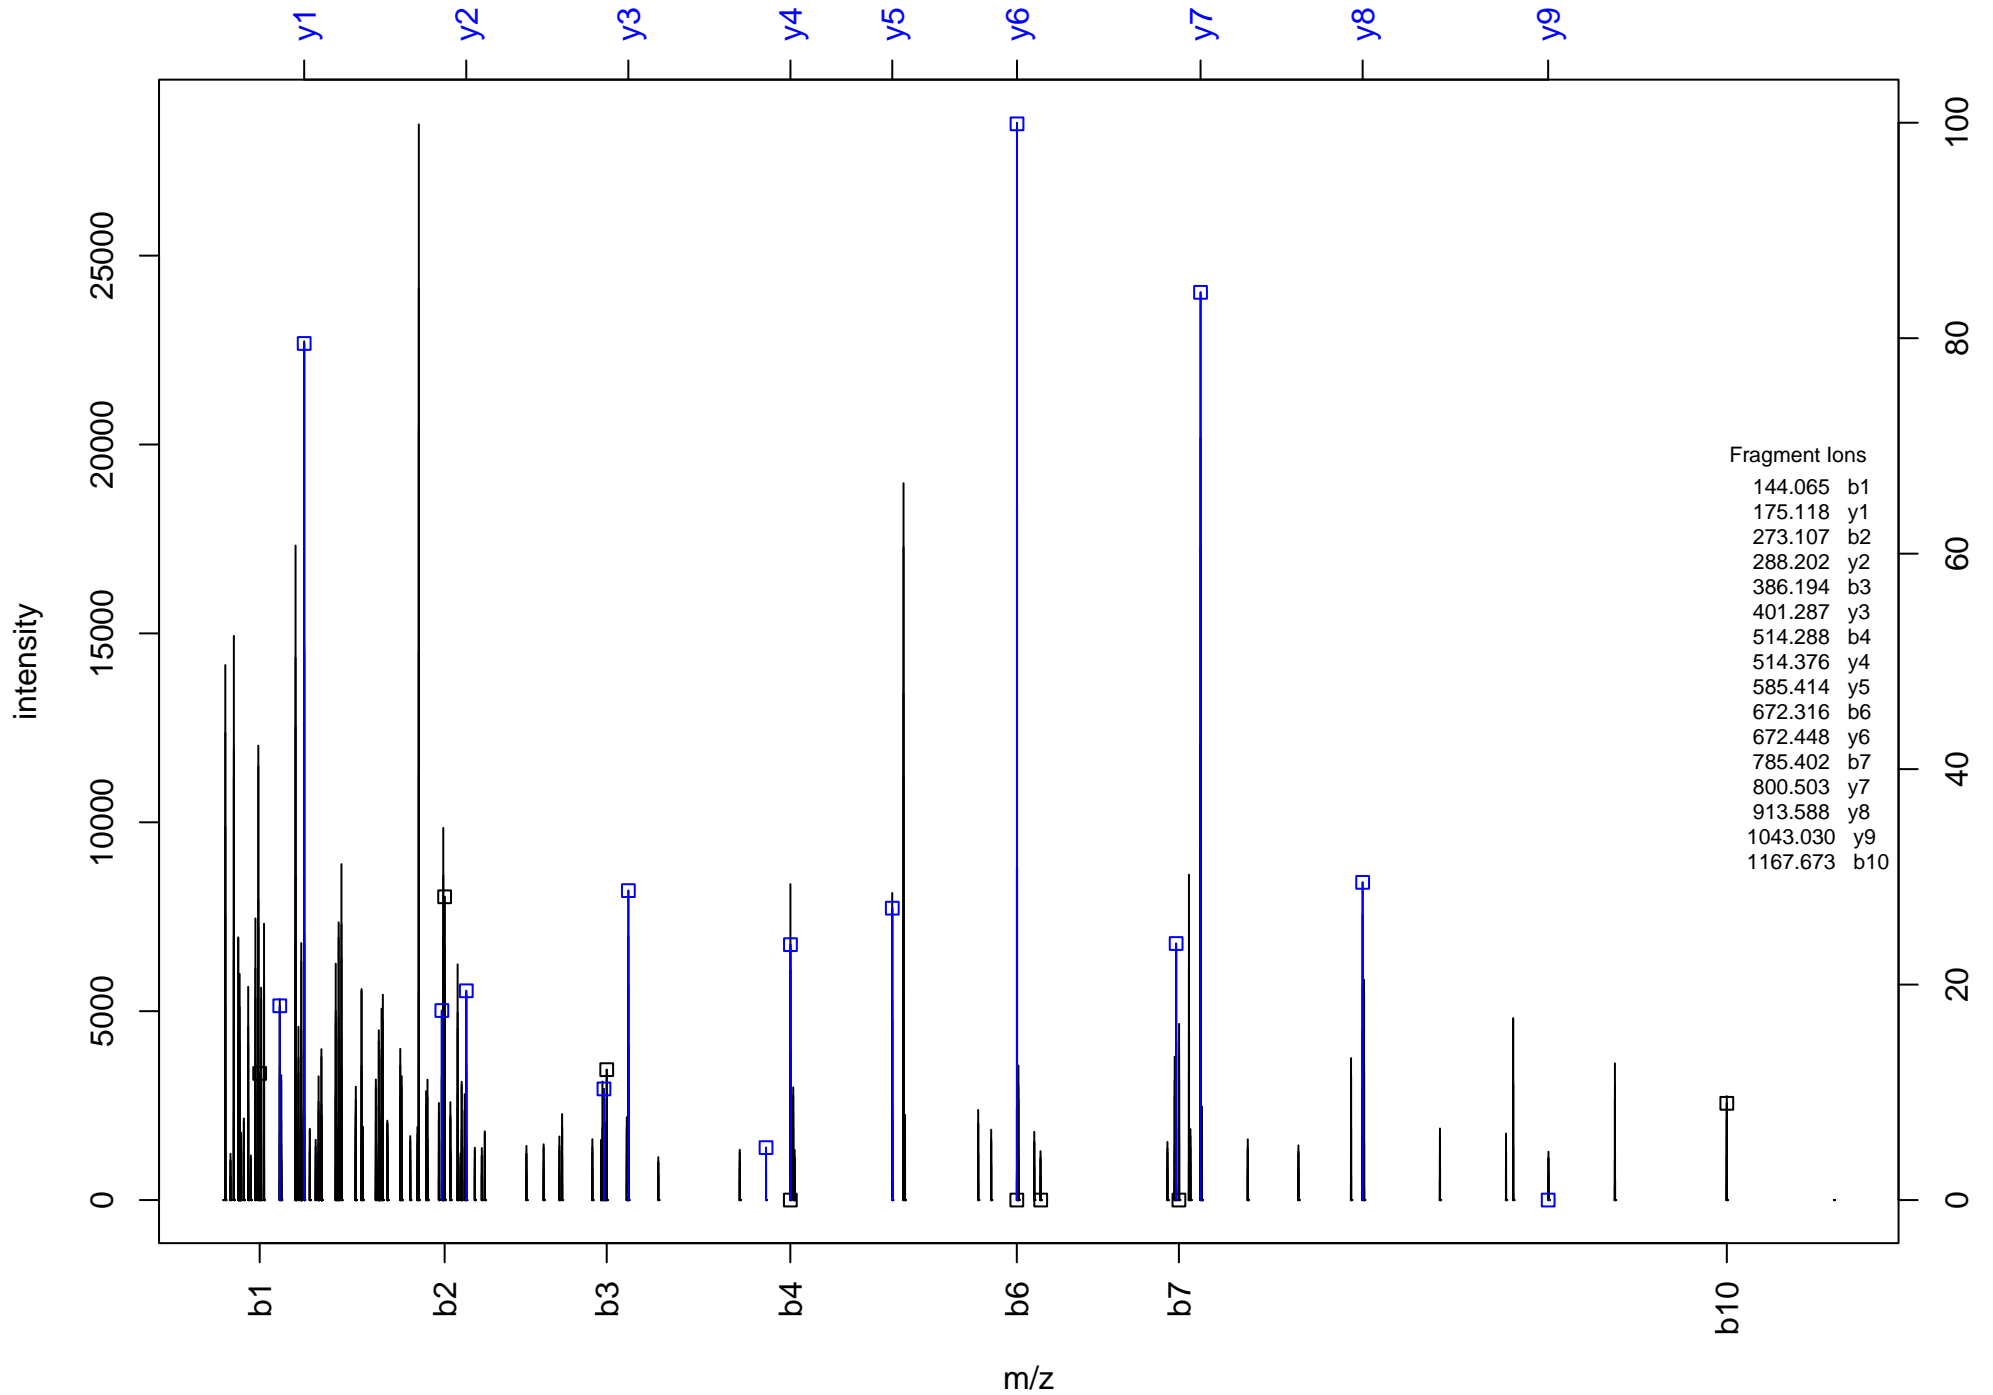

# QLSVEPYSQEEAER

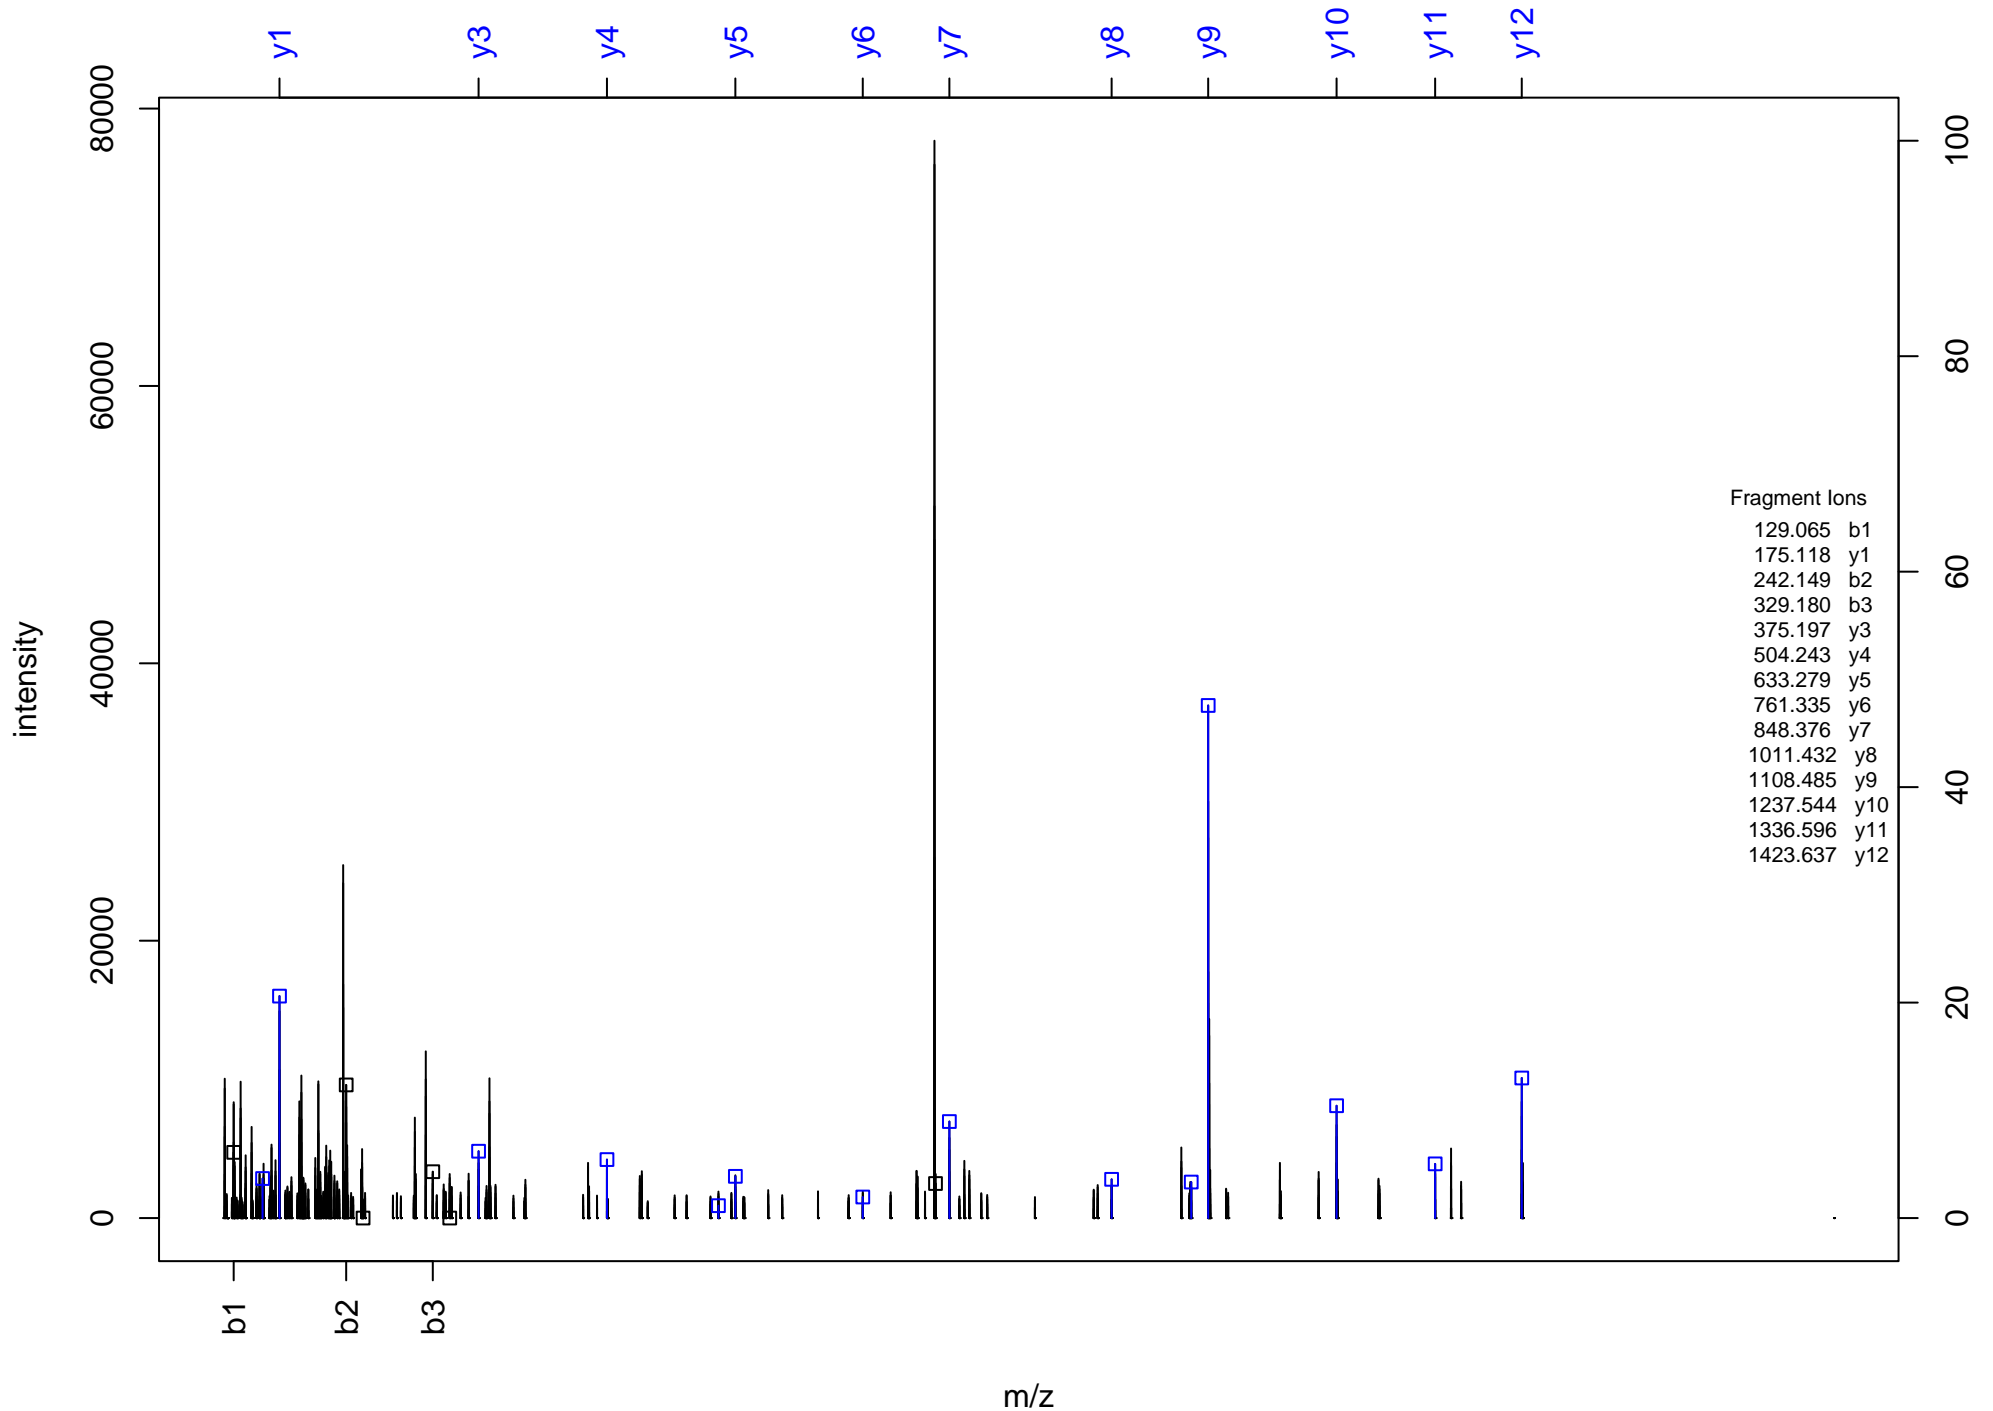

# EPPPGMFVVPDTVDMTK

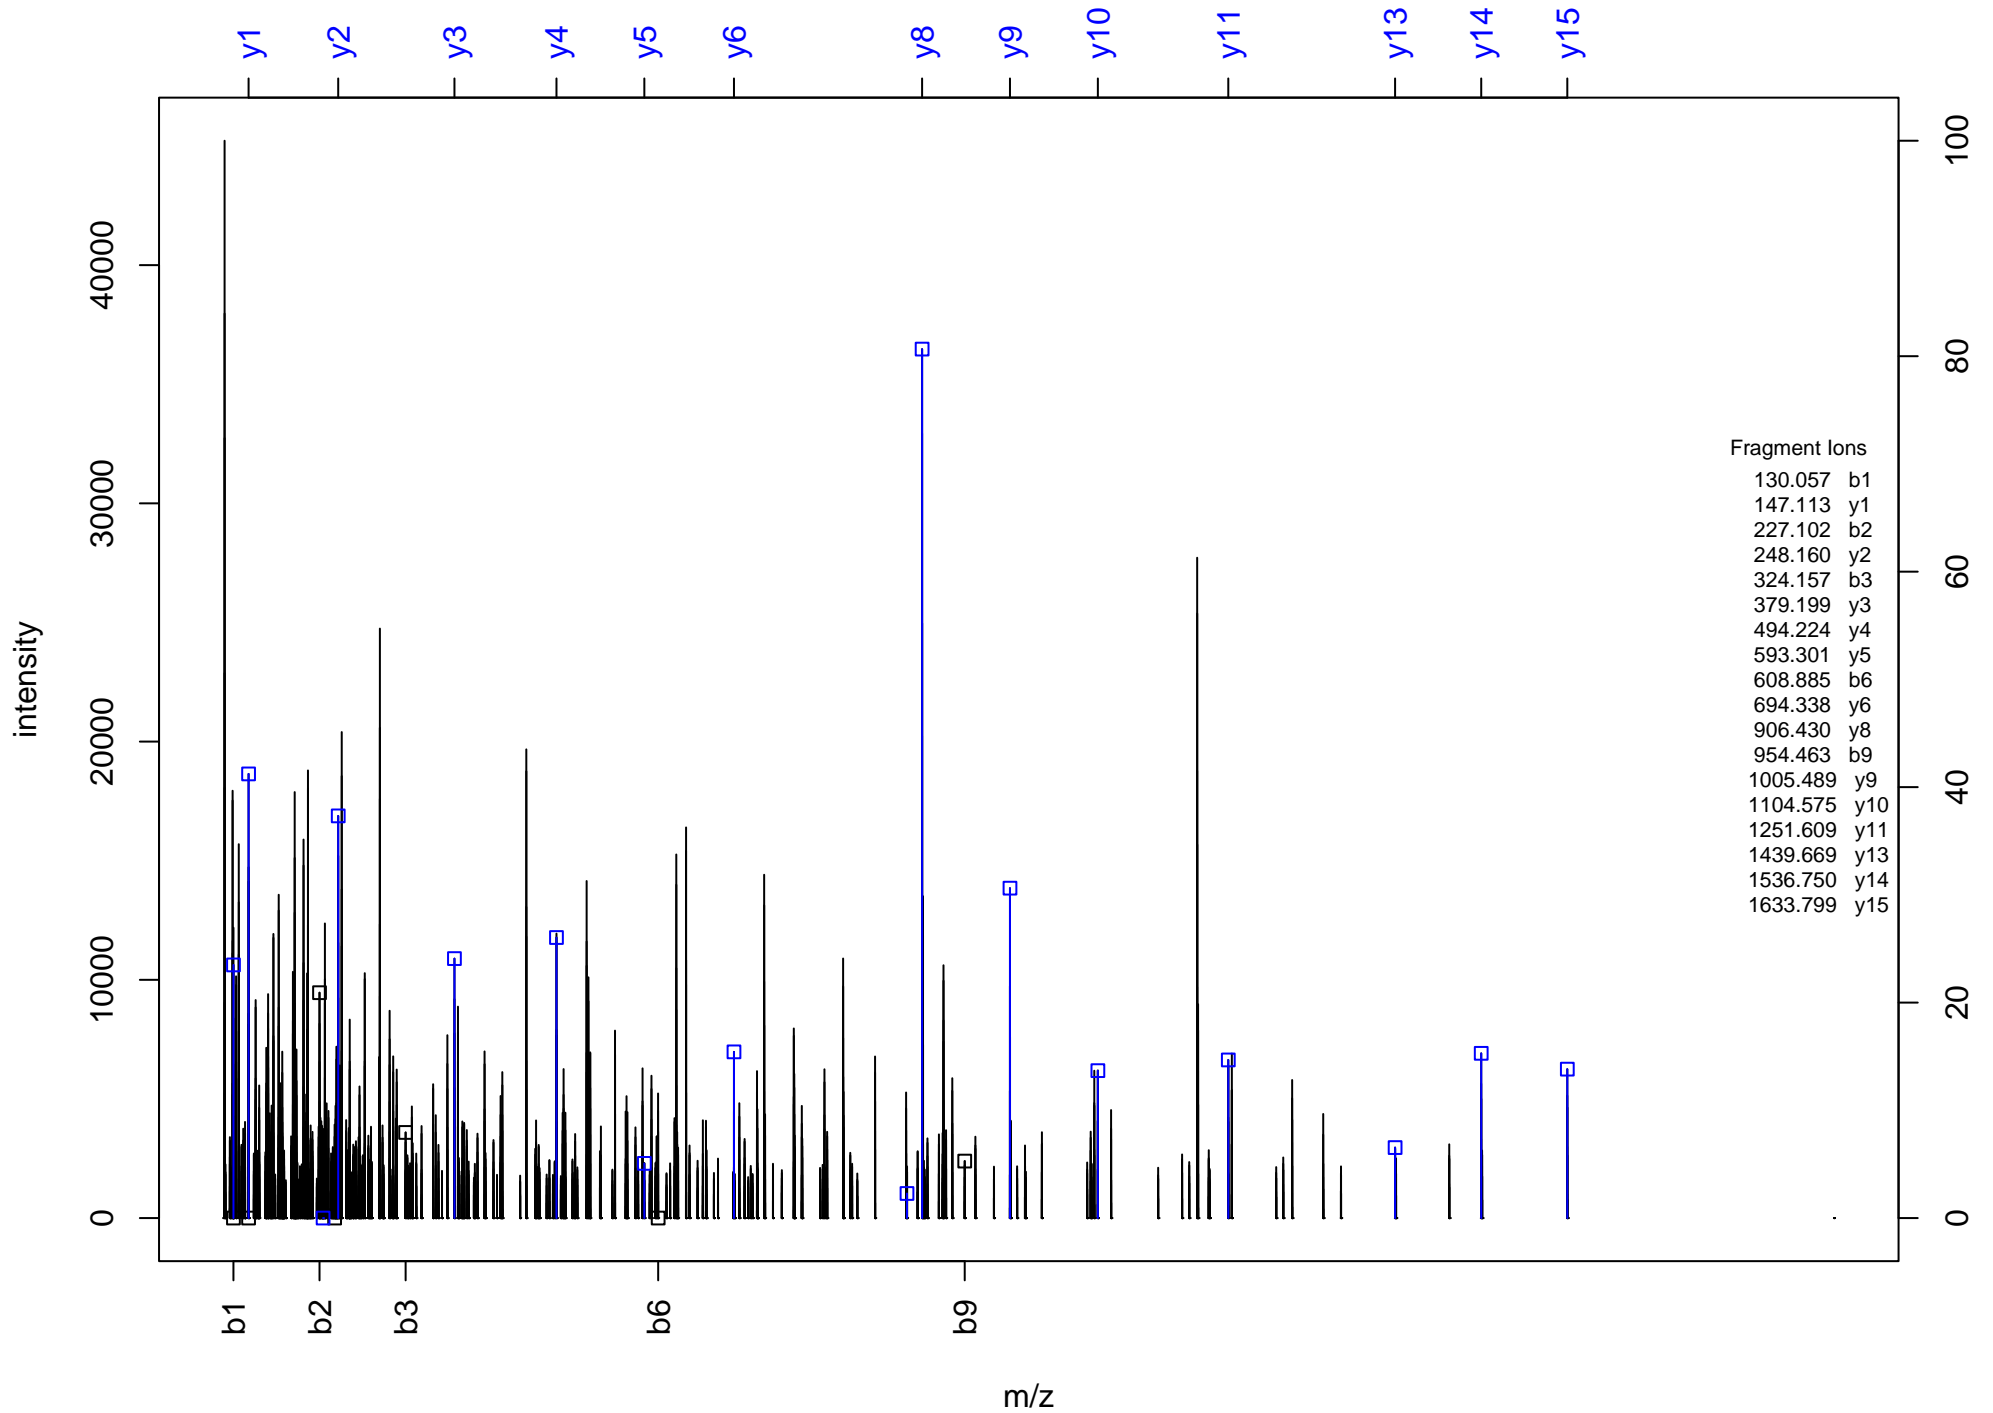

# ELVVNCCTEFIHLISSEANEICNK

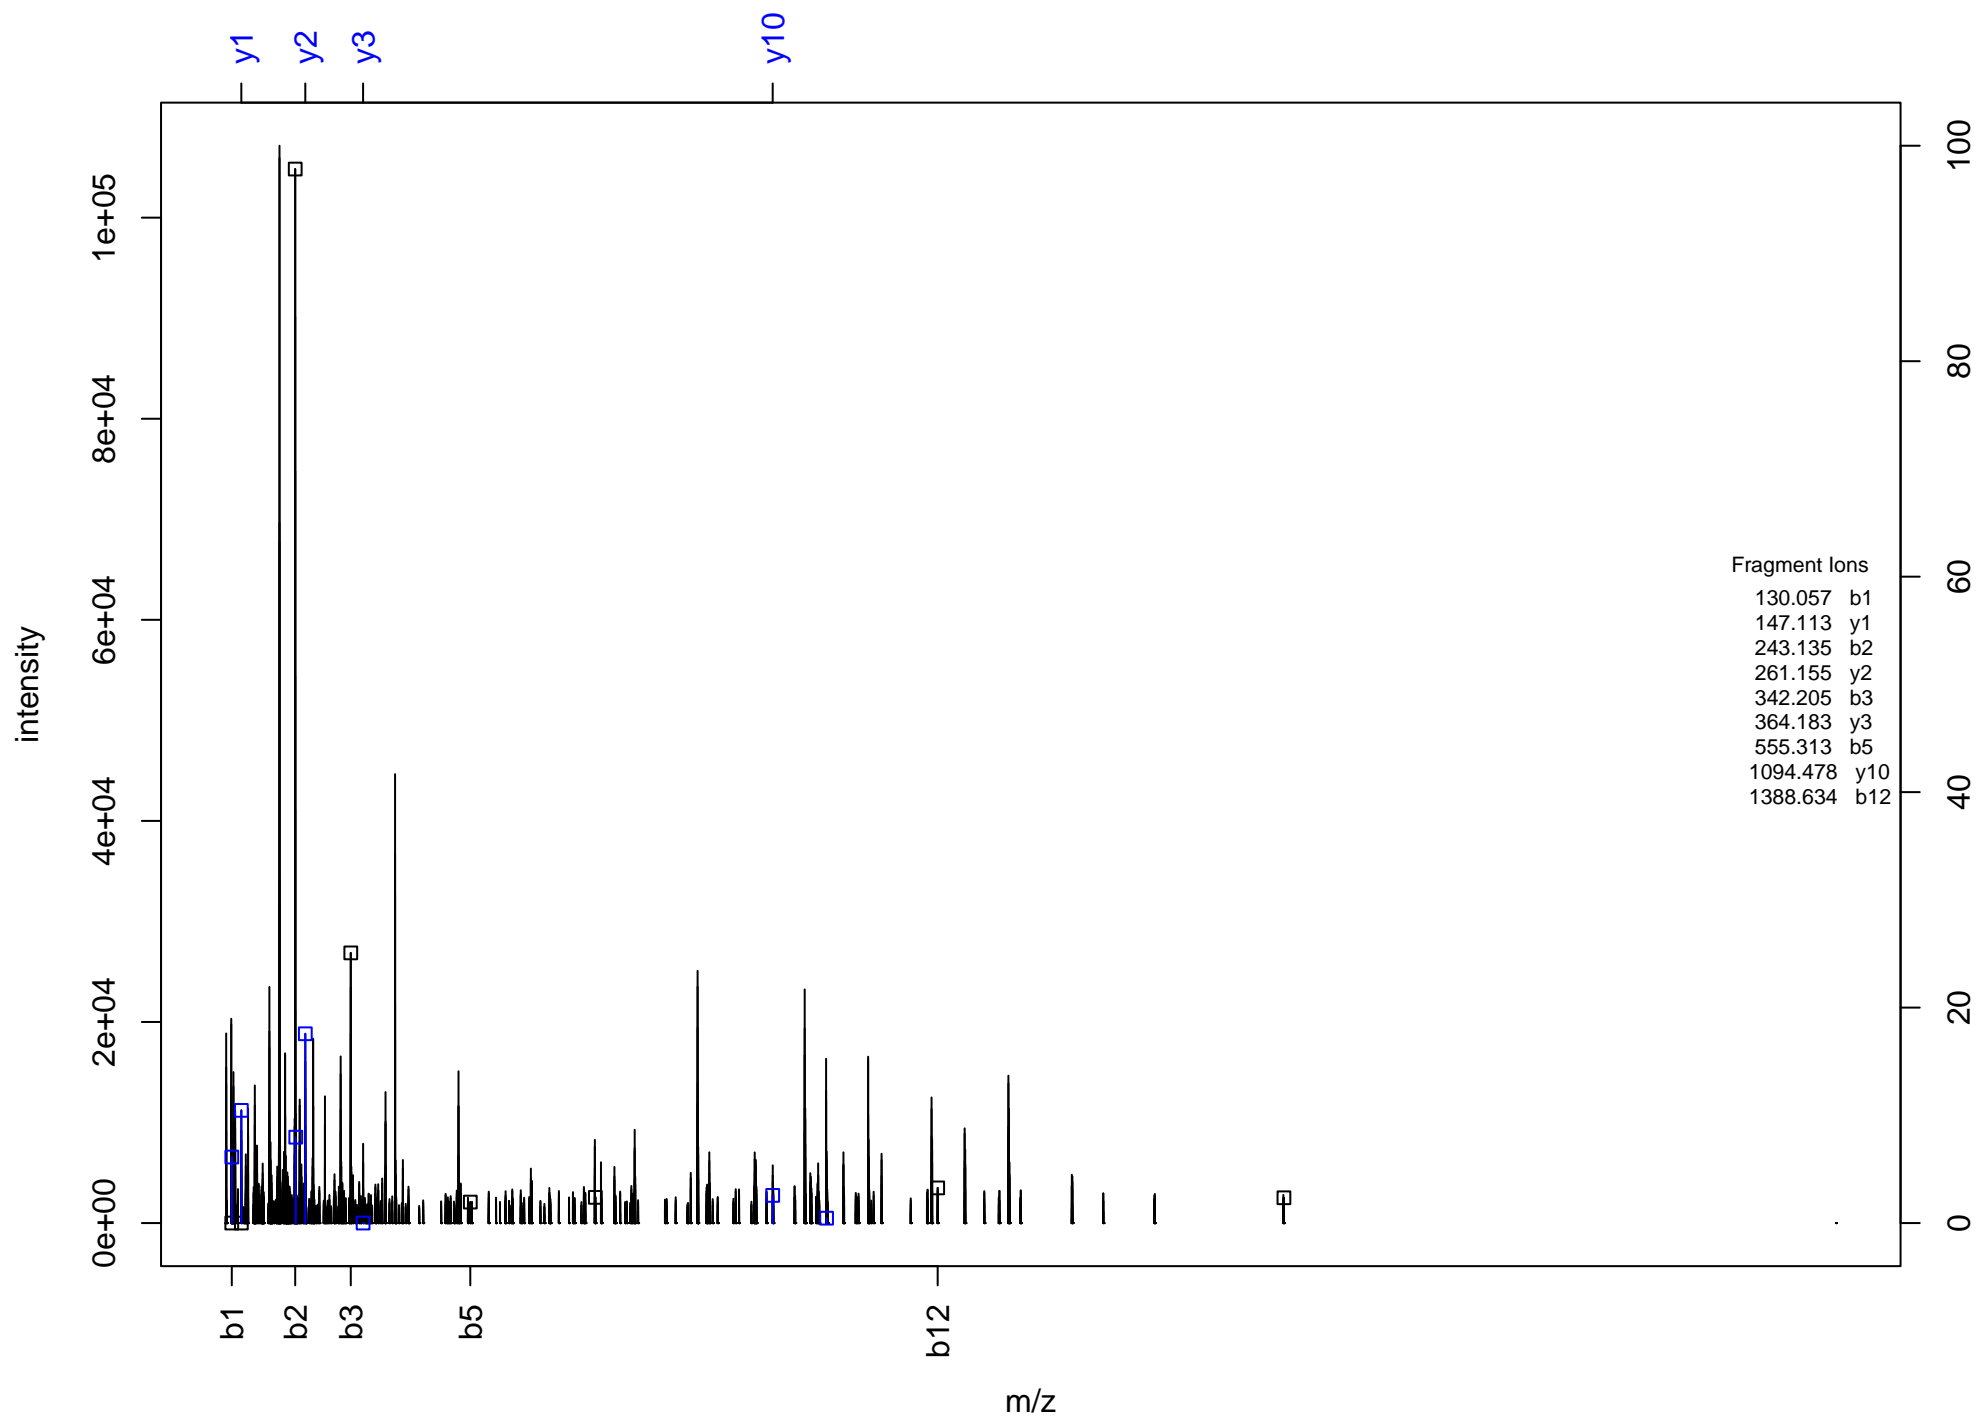



# LPGPAPLAHSR

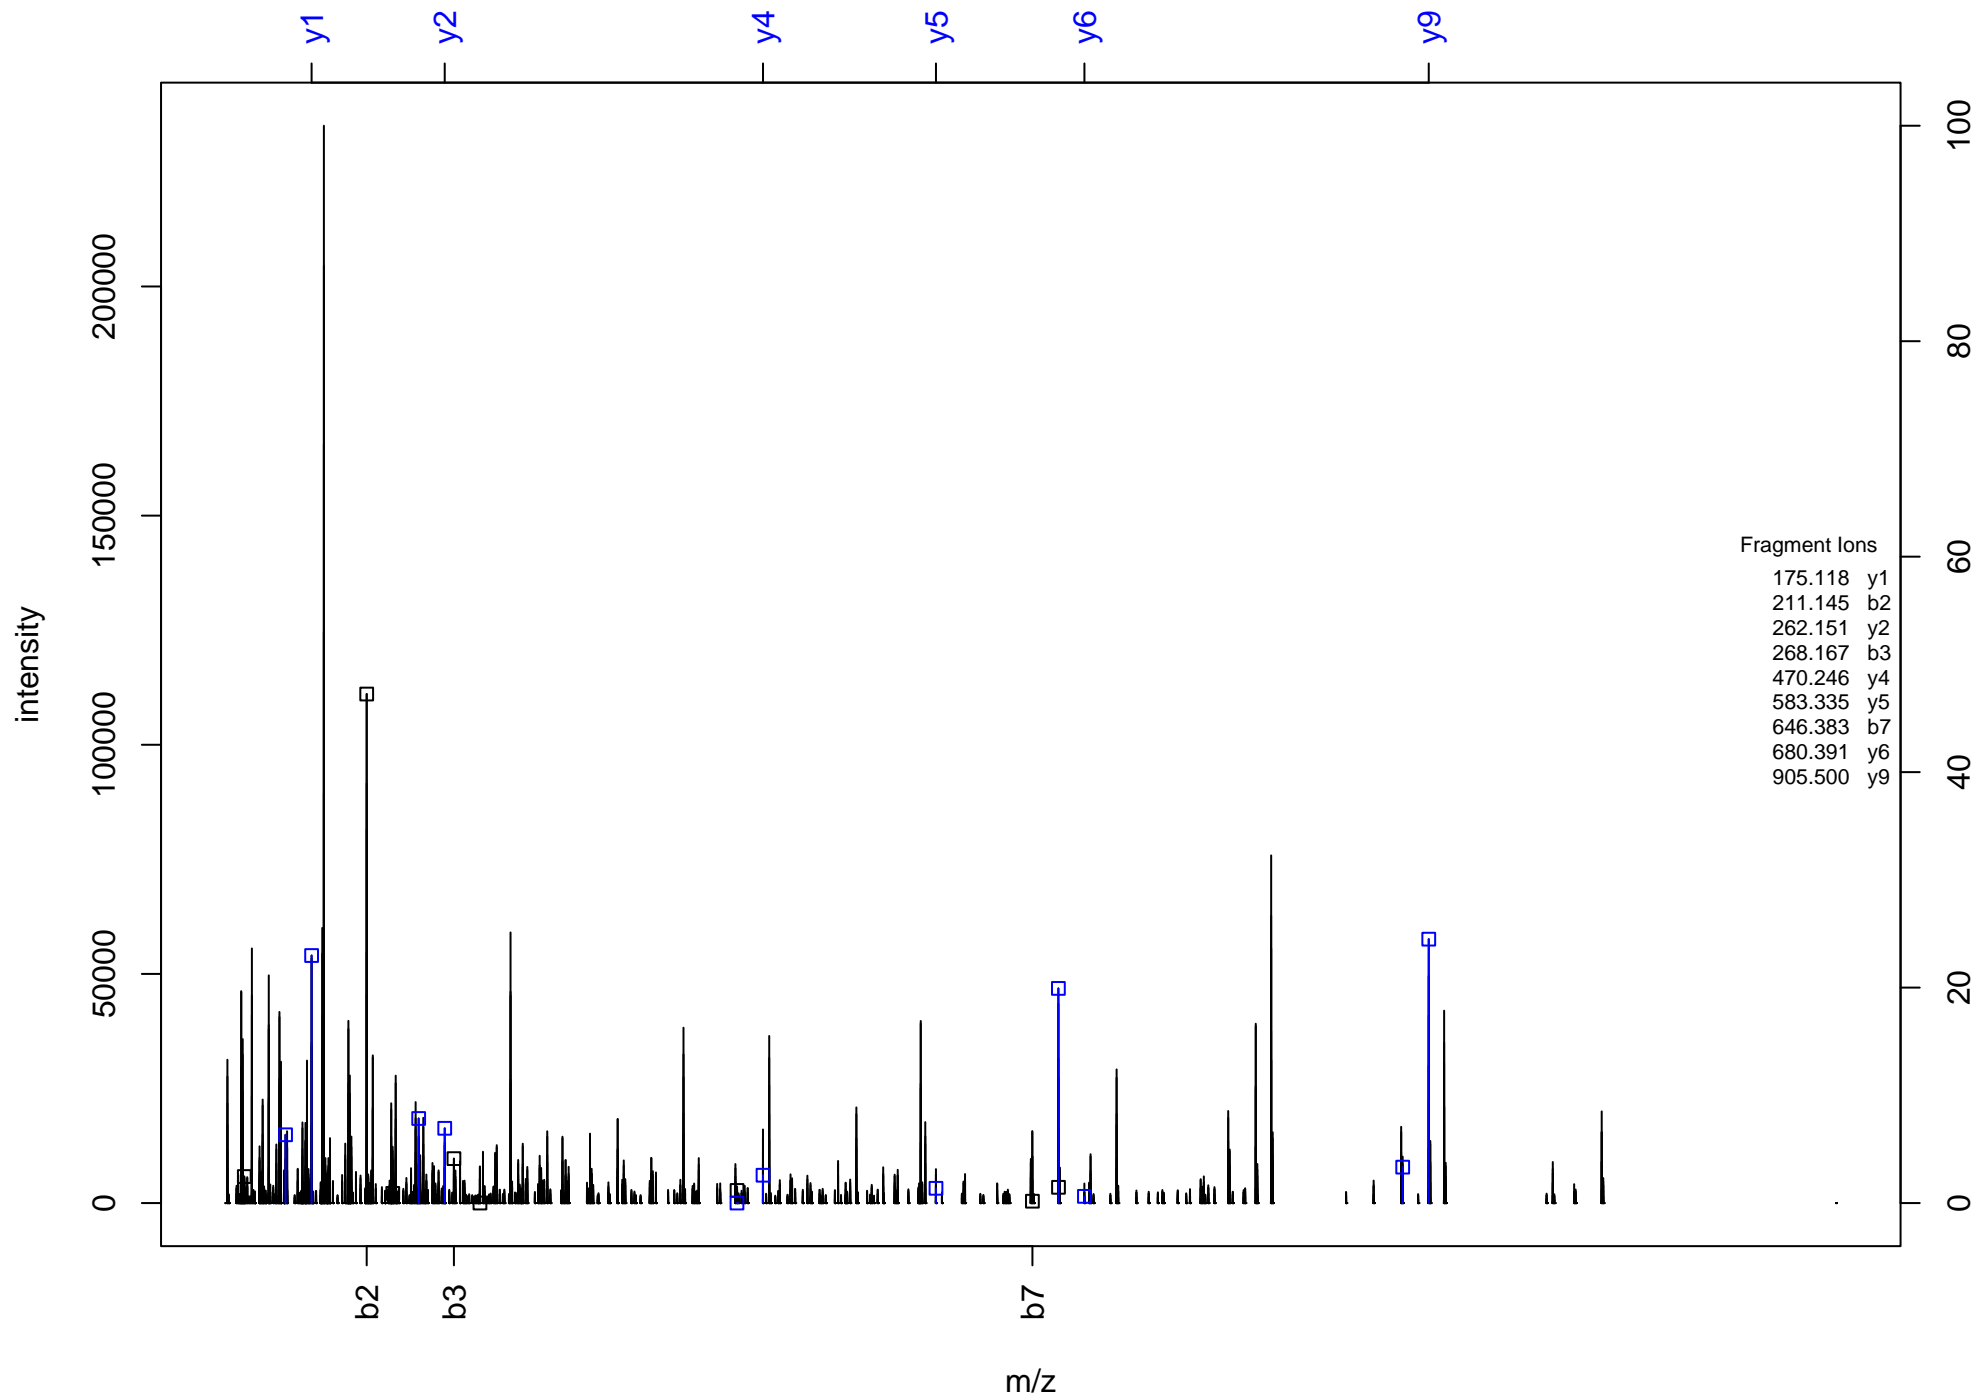

# EVELQLR

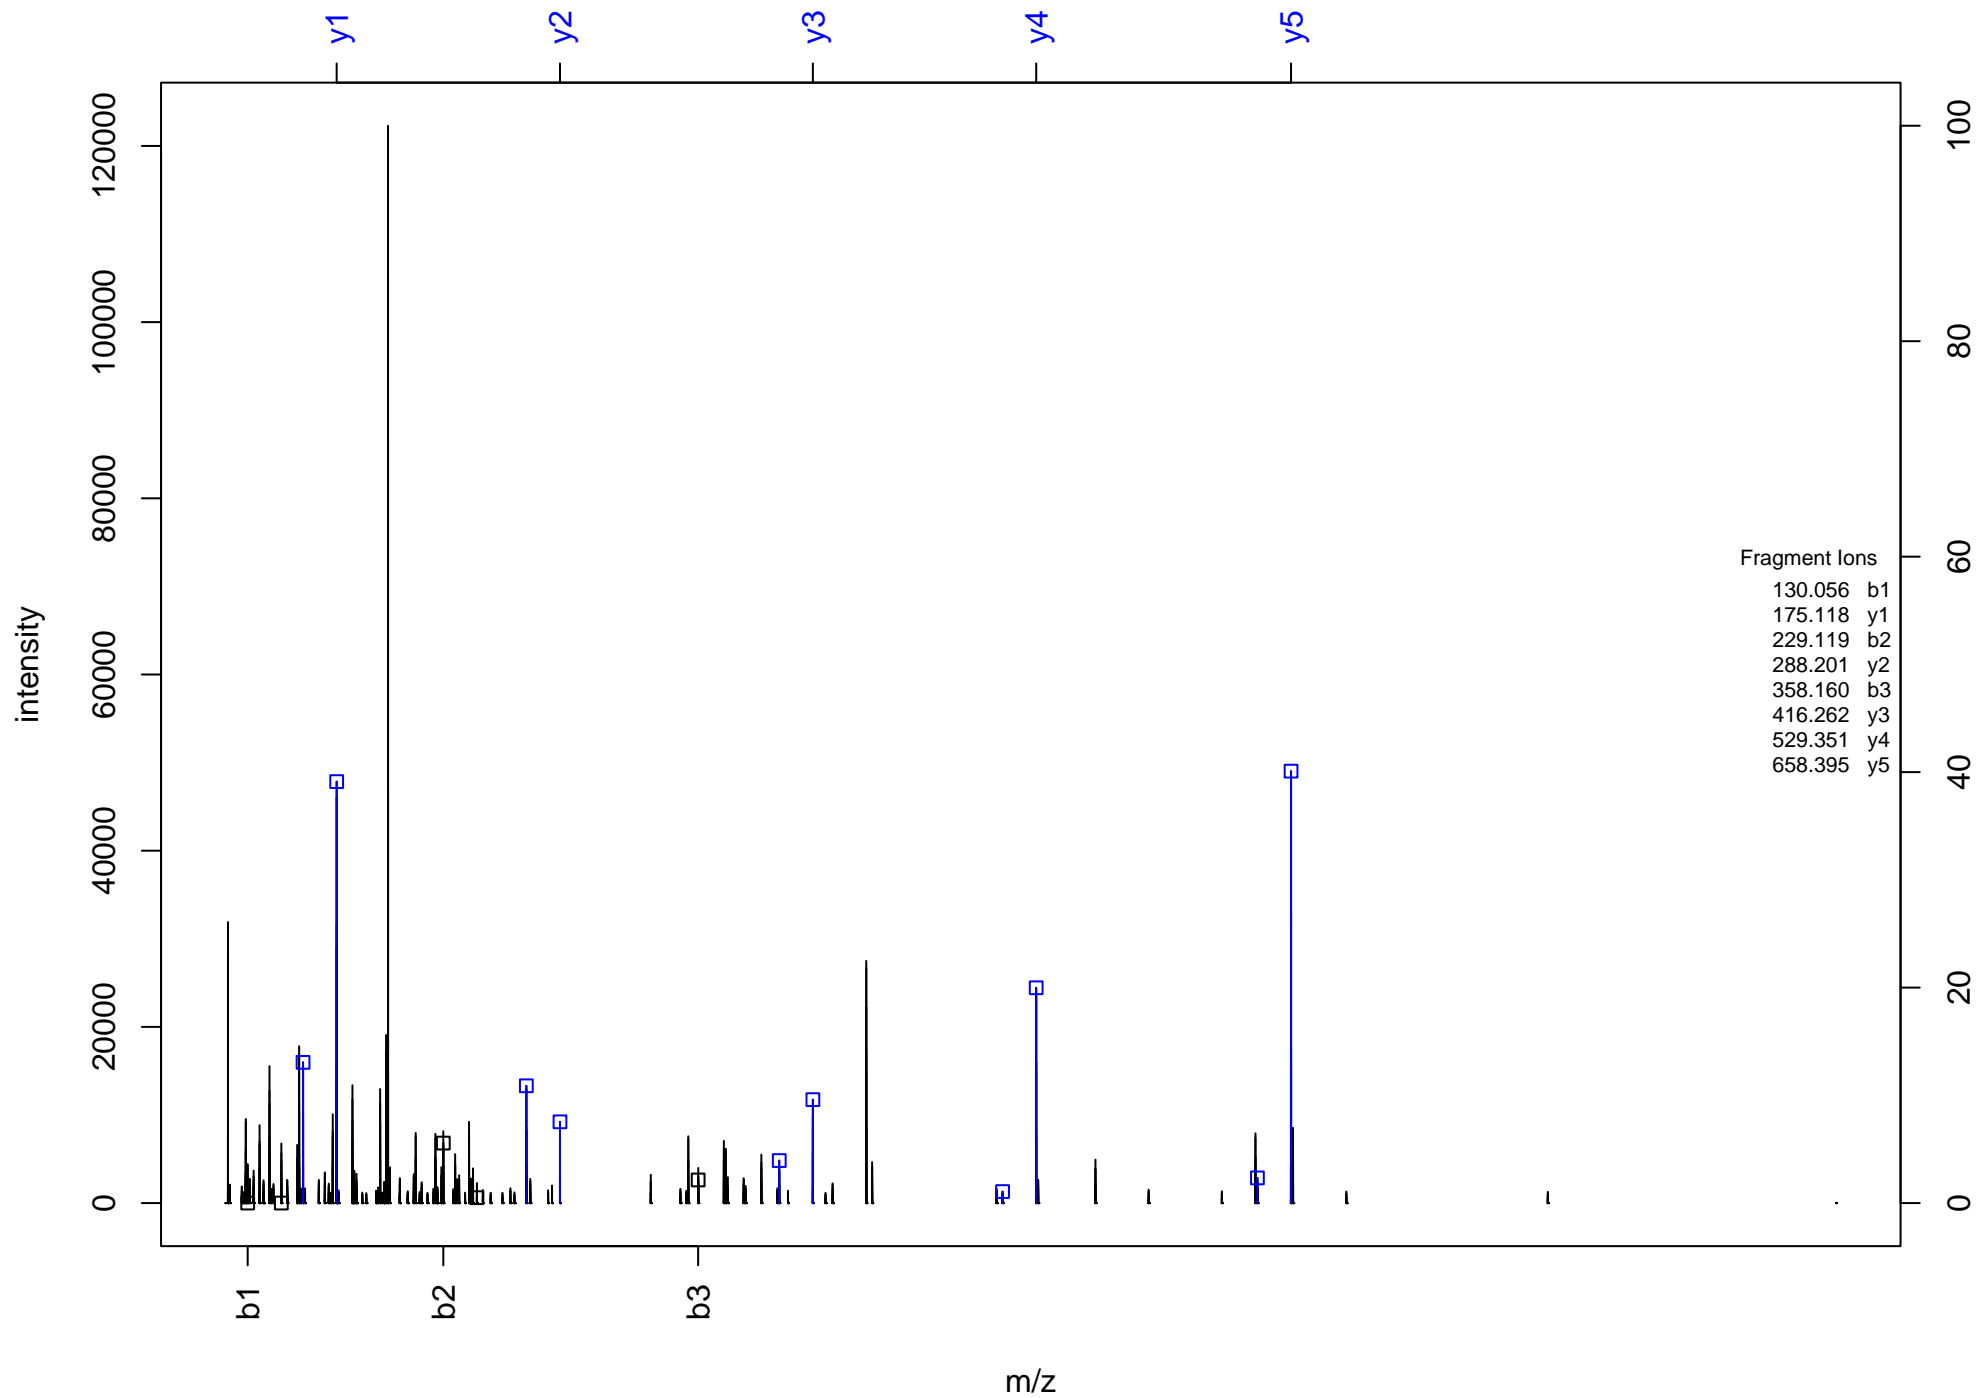

# FCPAGVYEFVPLEQGDGFR

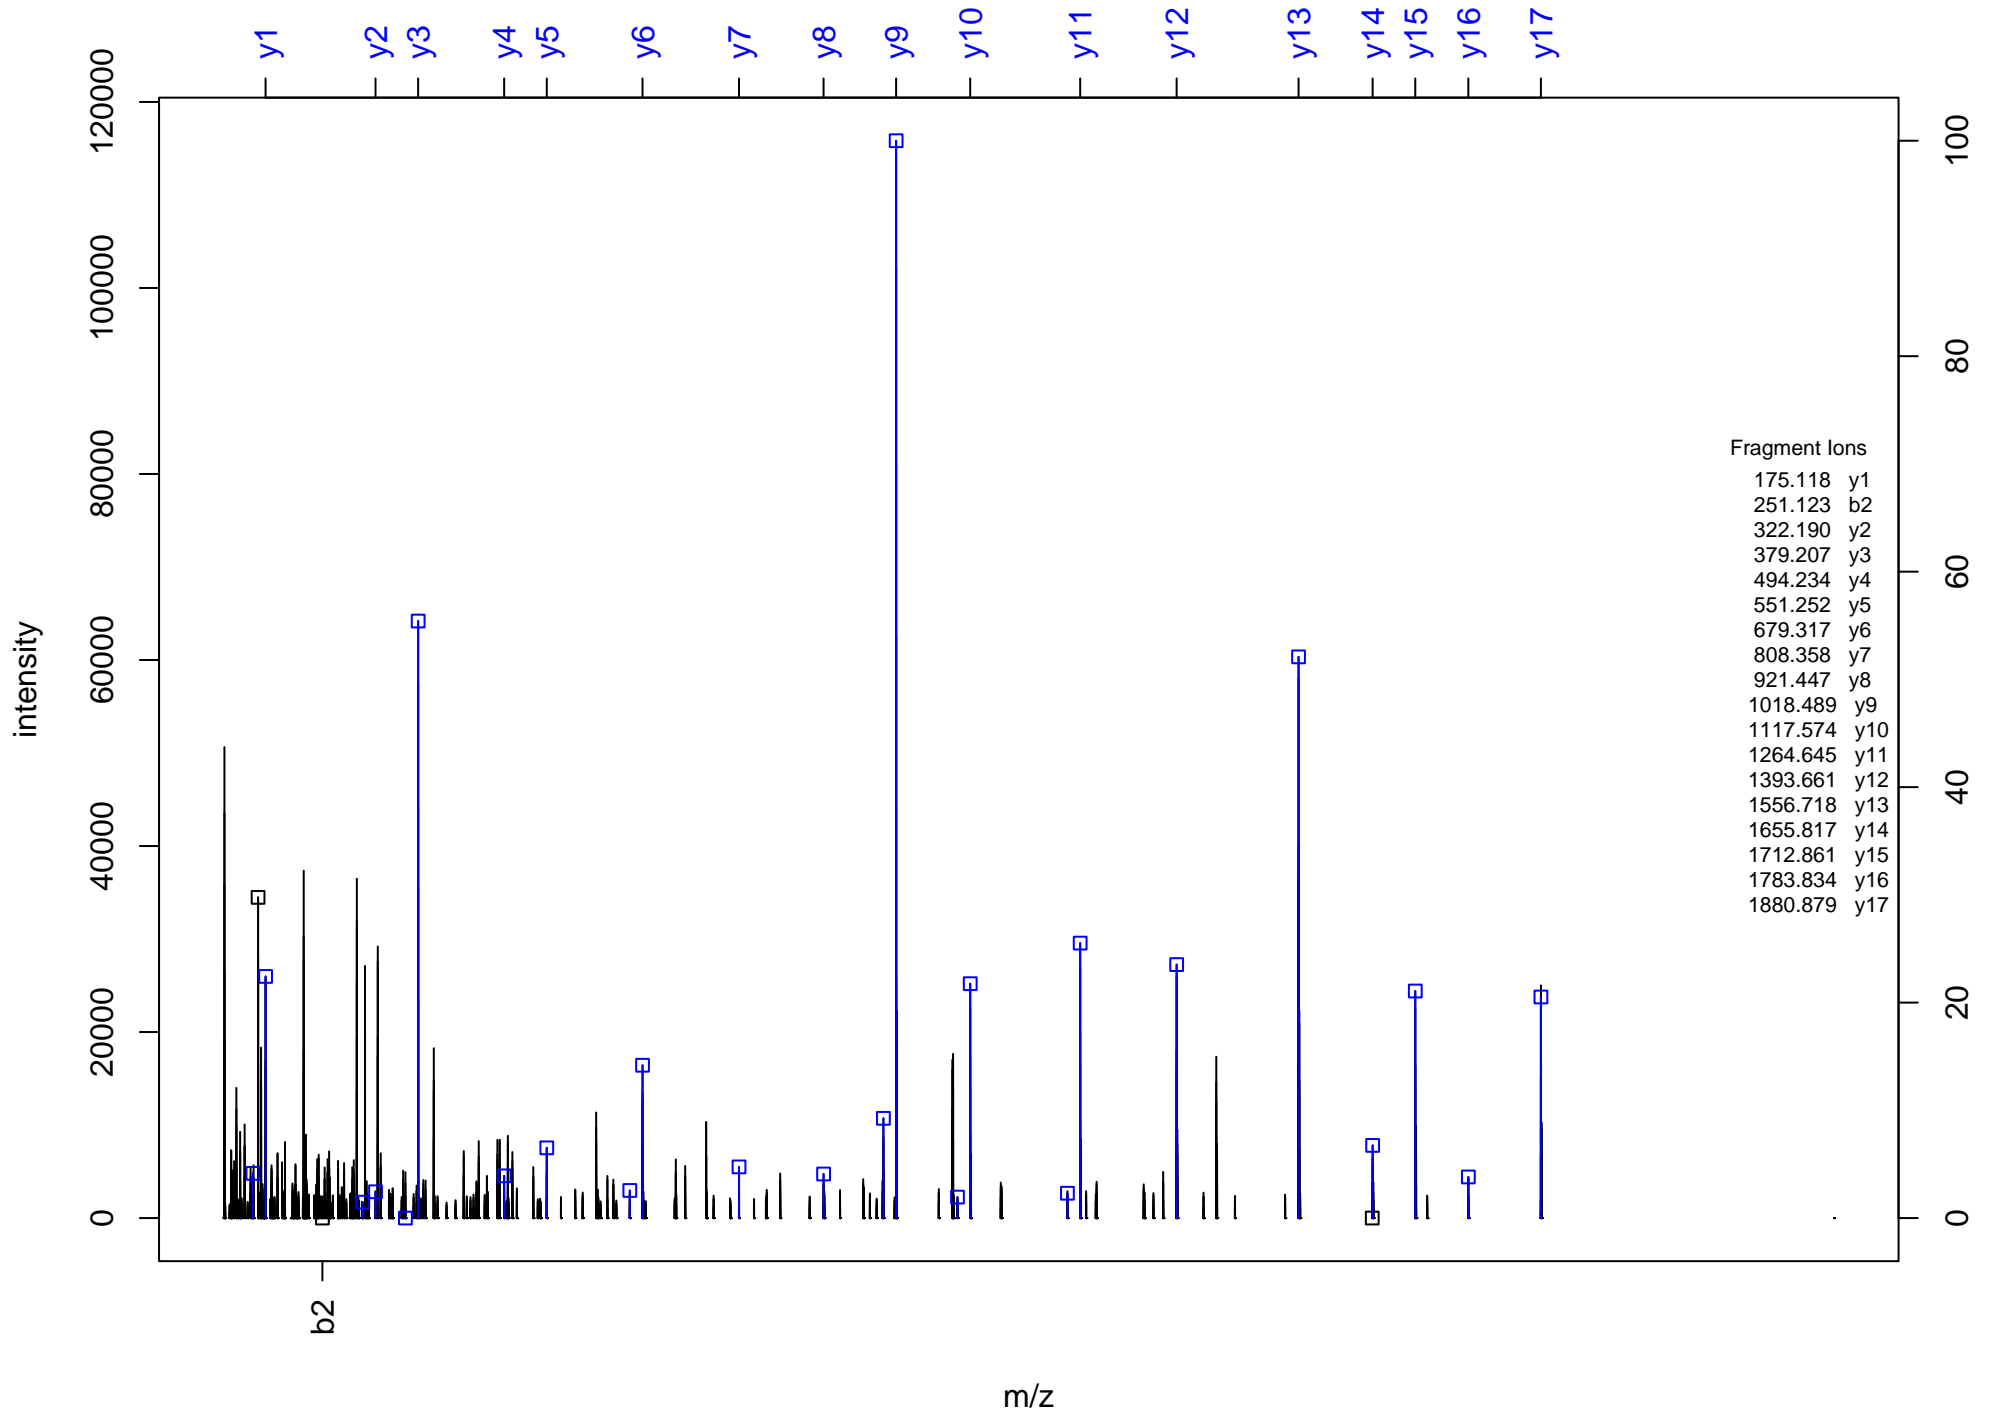

# DLNELDDVPFFDVR

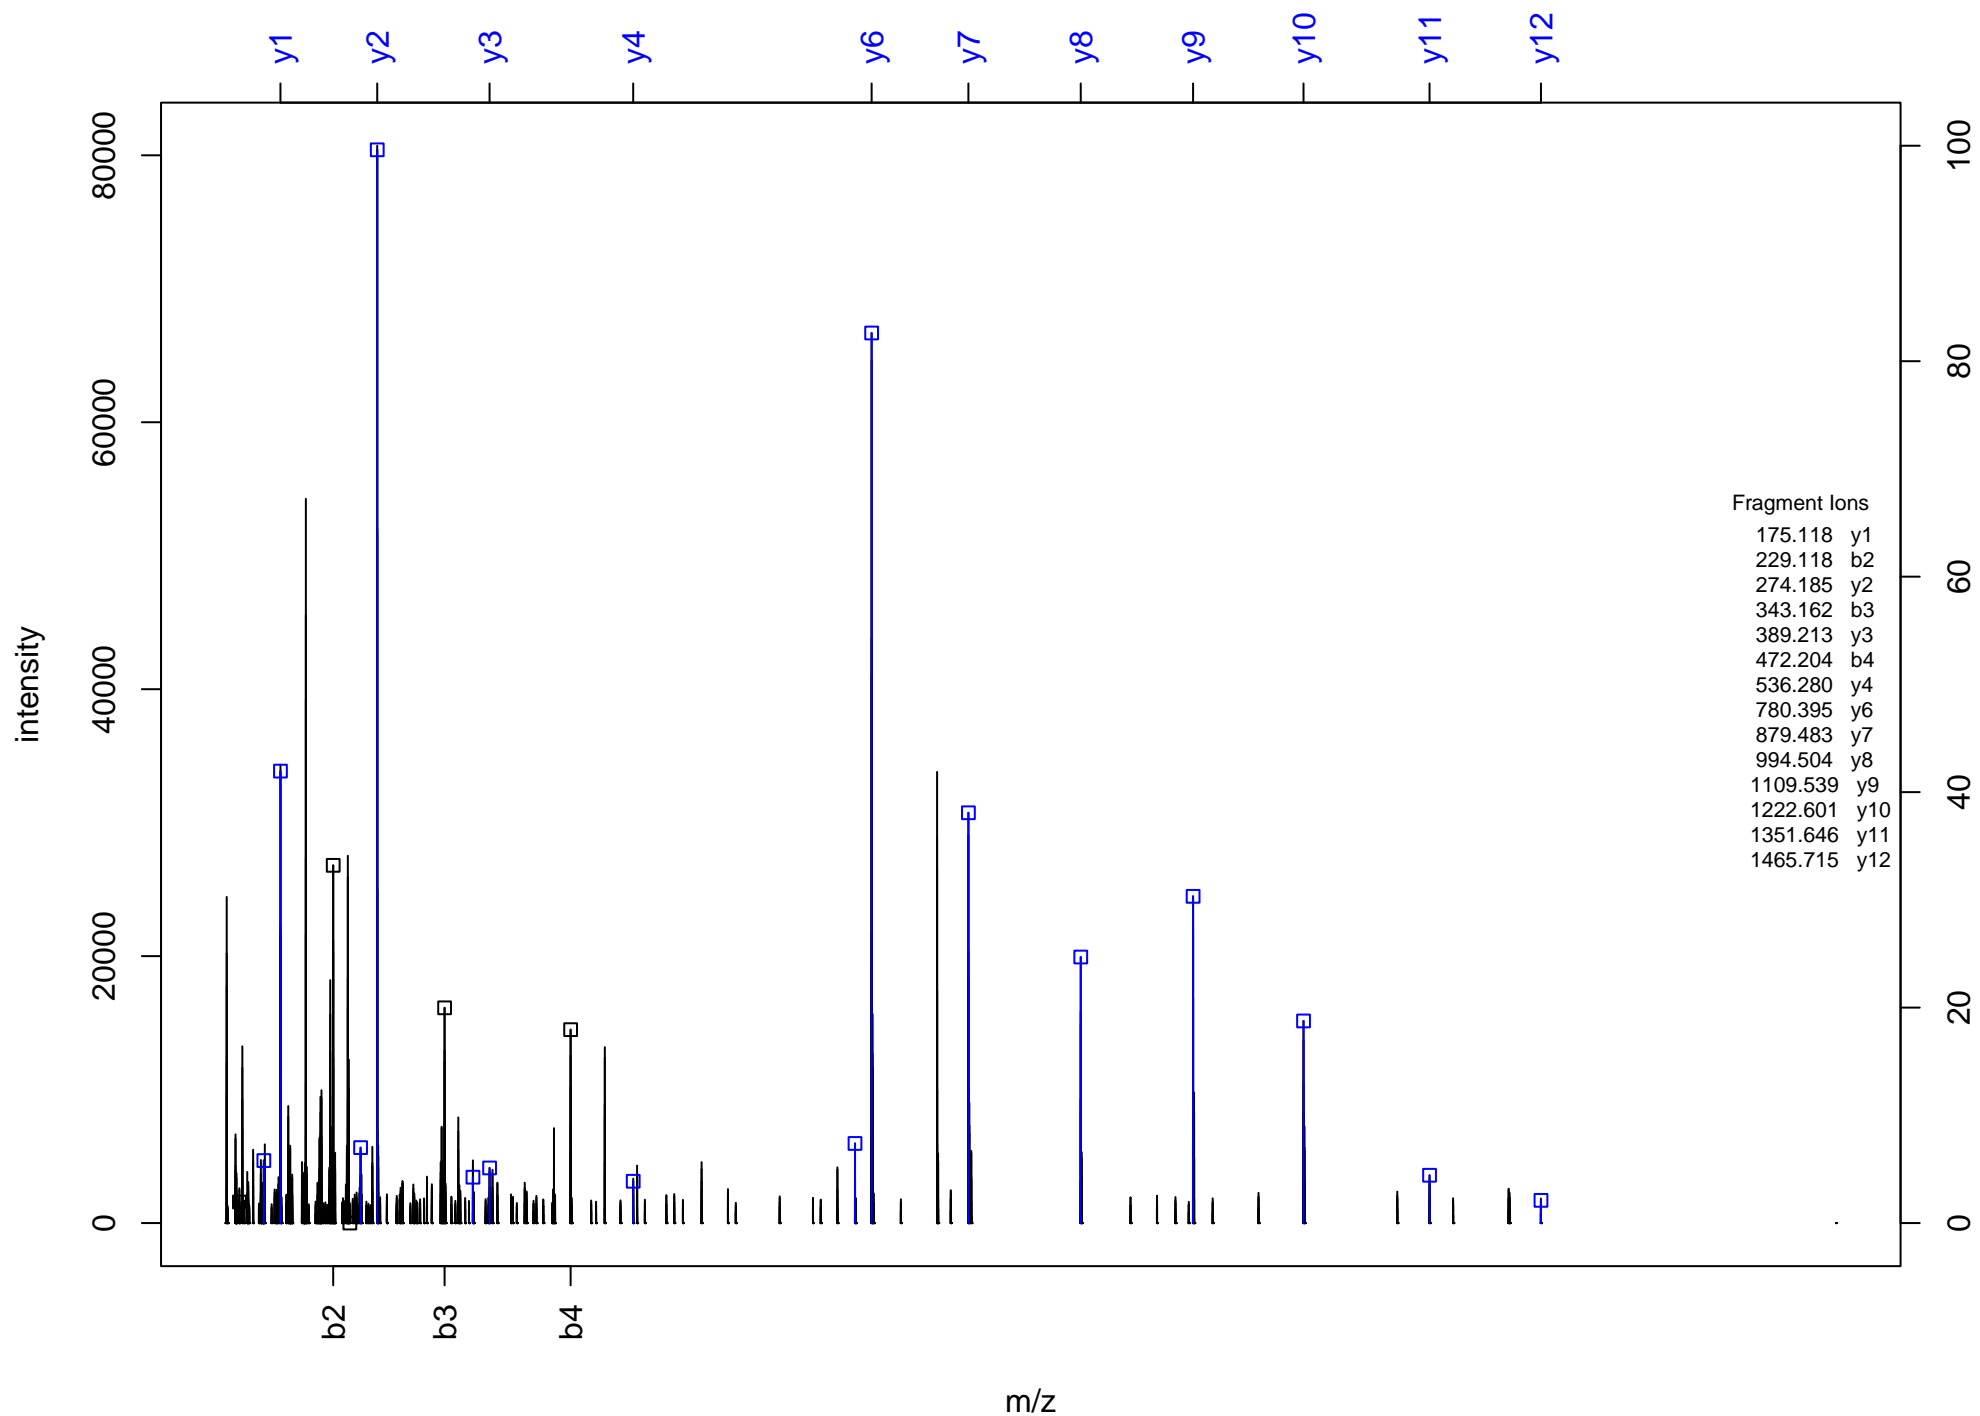

# VQQYPFTEDQEIPETDWEVYLR

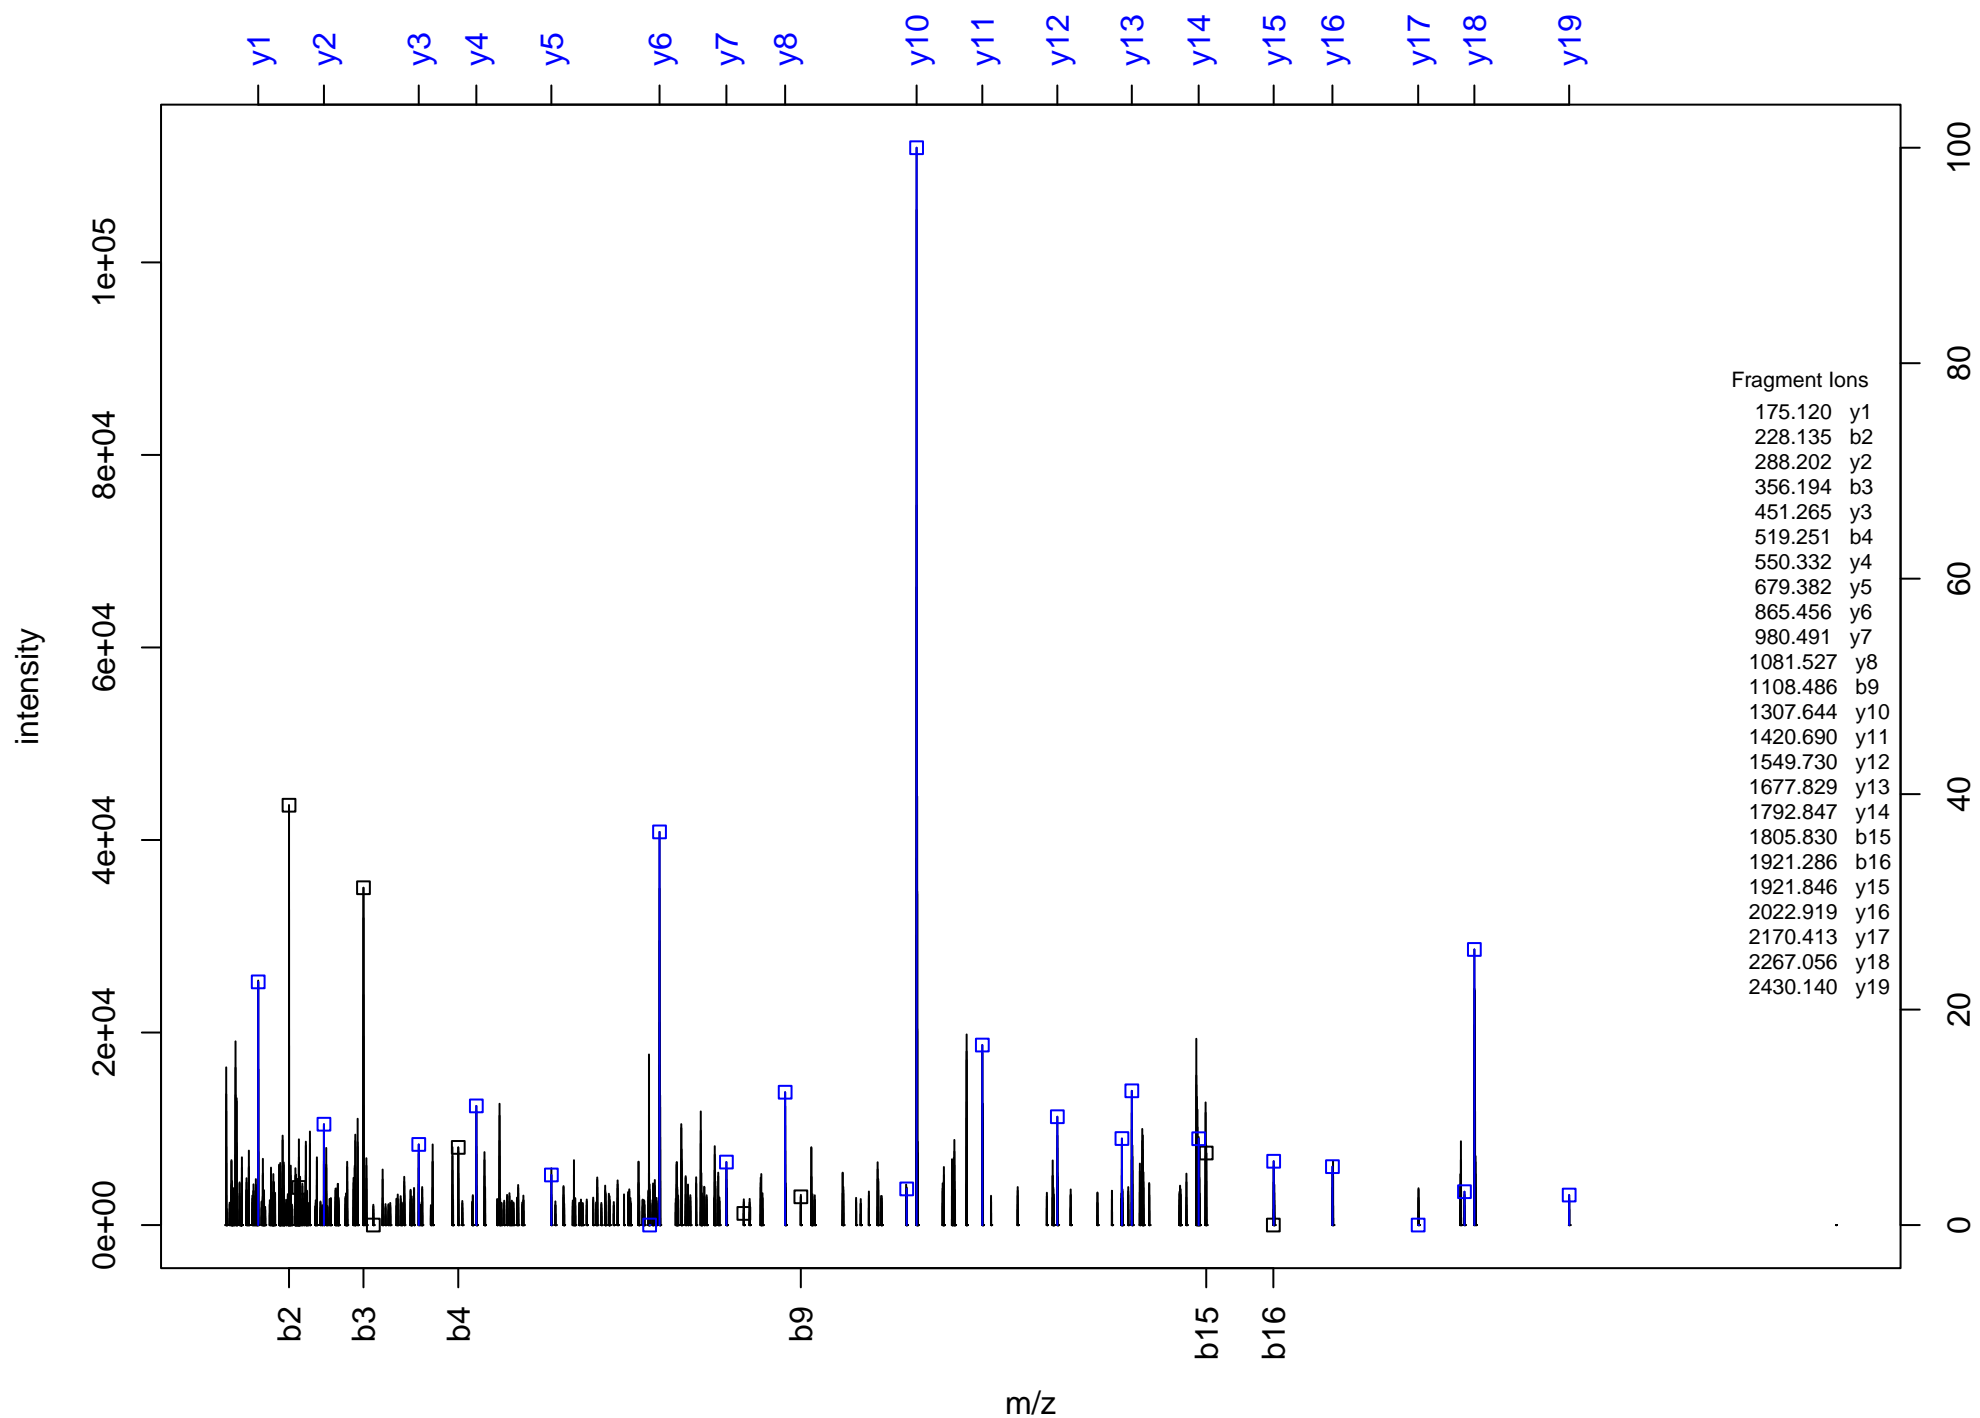

# MLQPSGPPADKPEEN

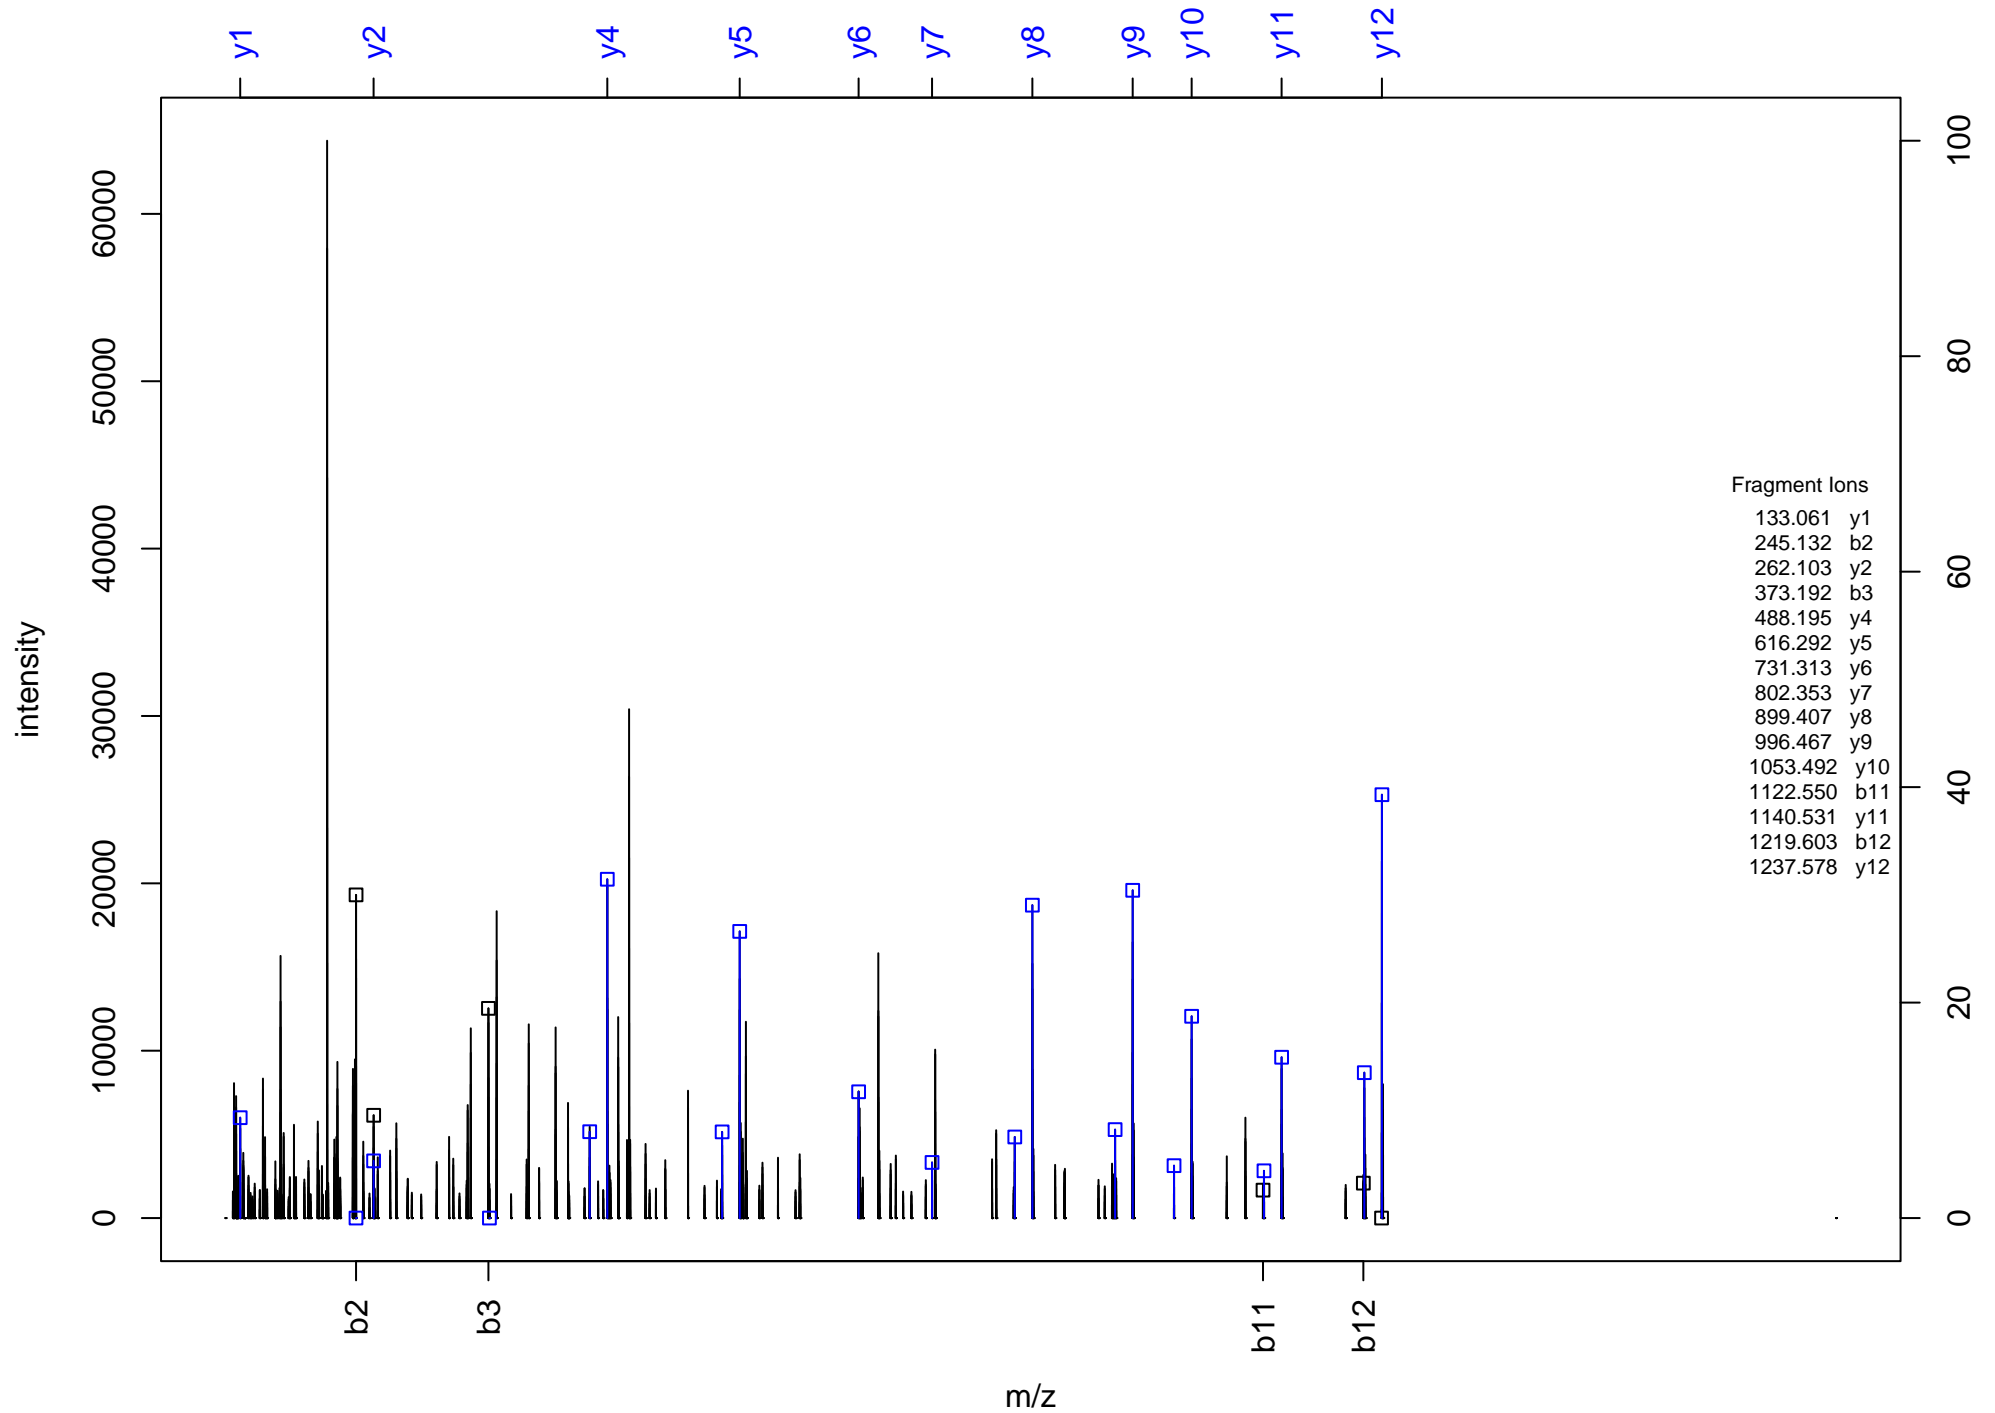

# AVDDSYNVQPDTVAPIWNL

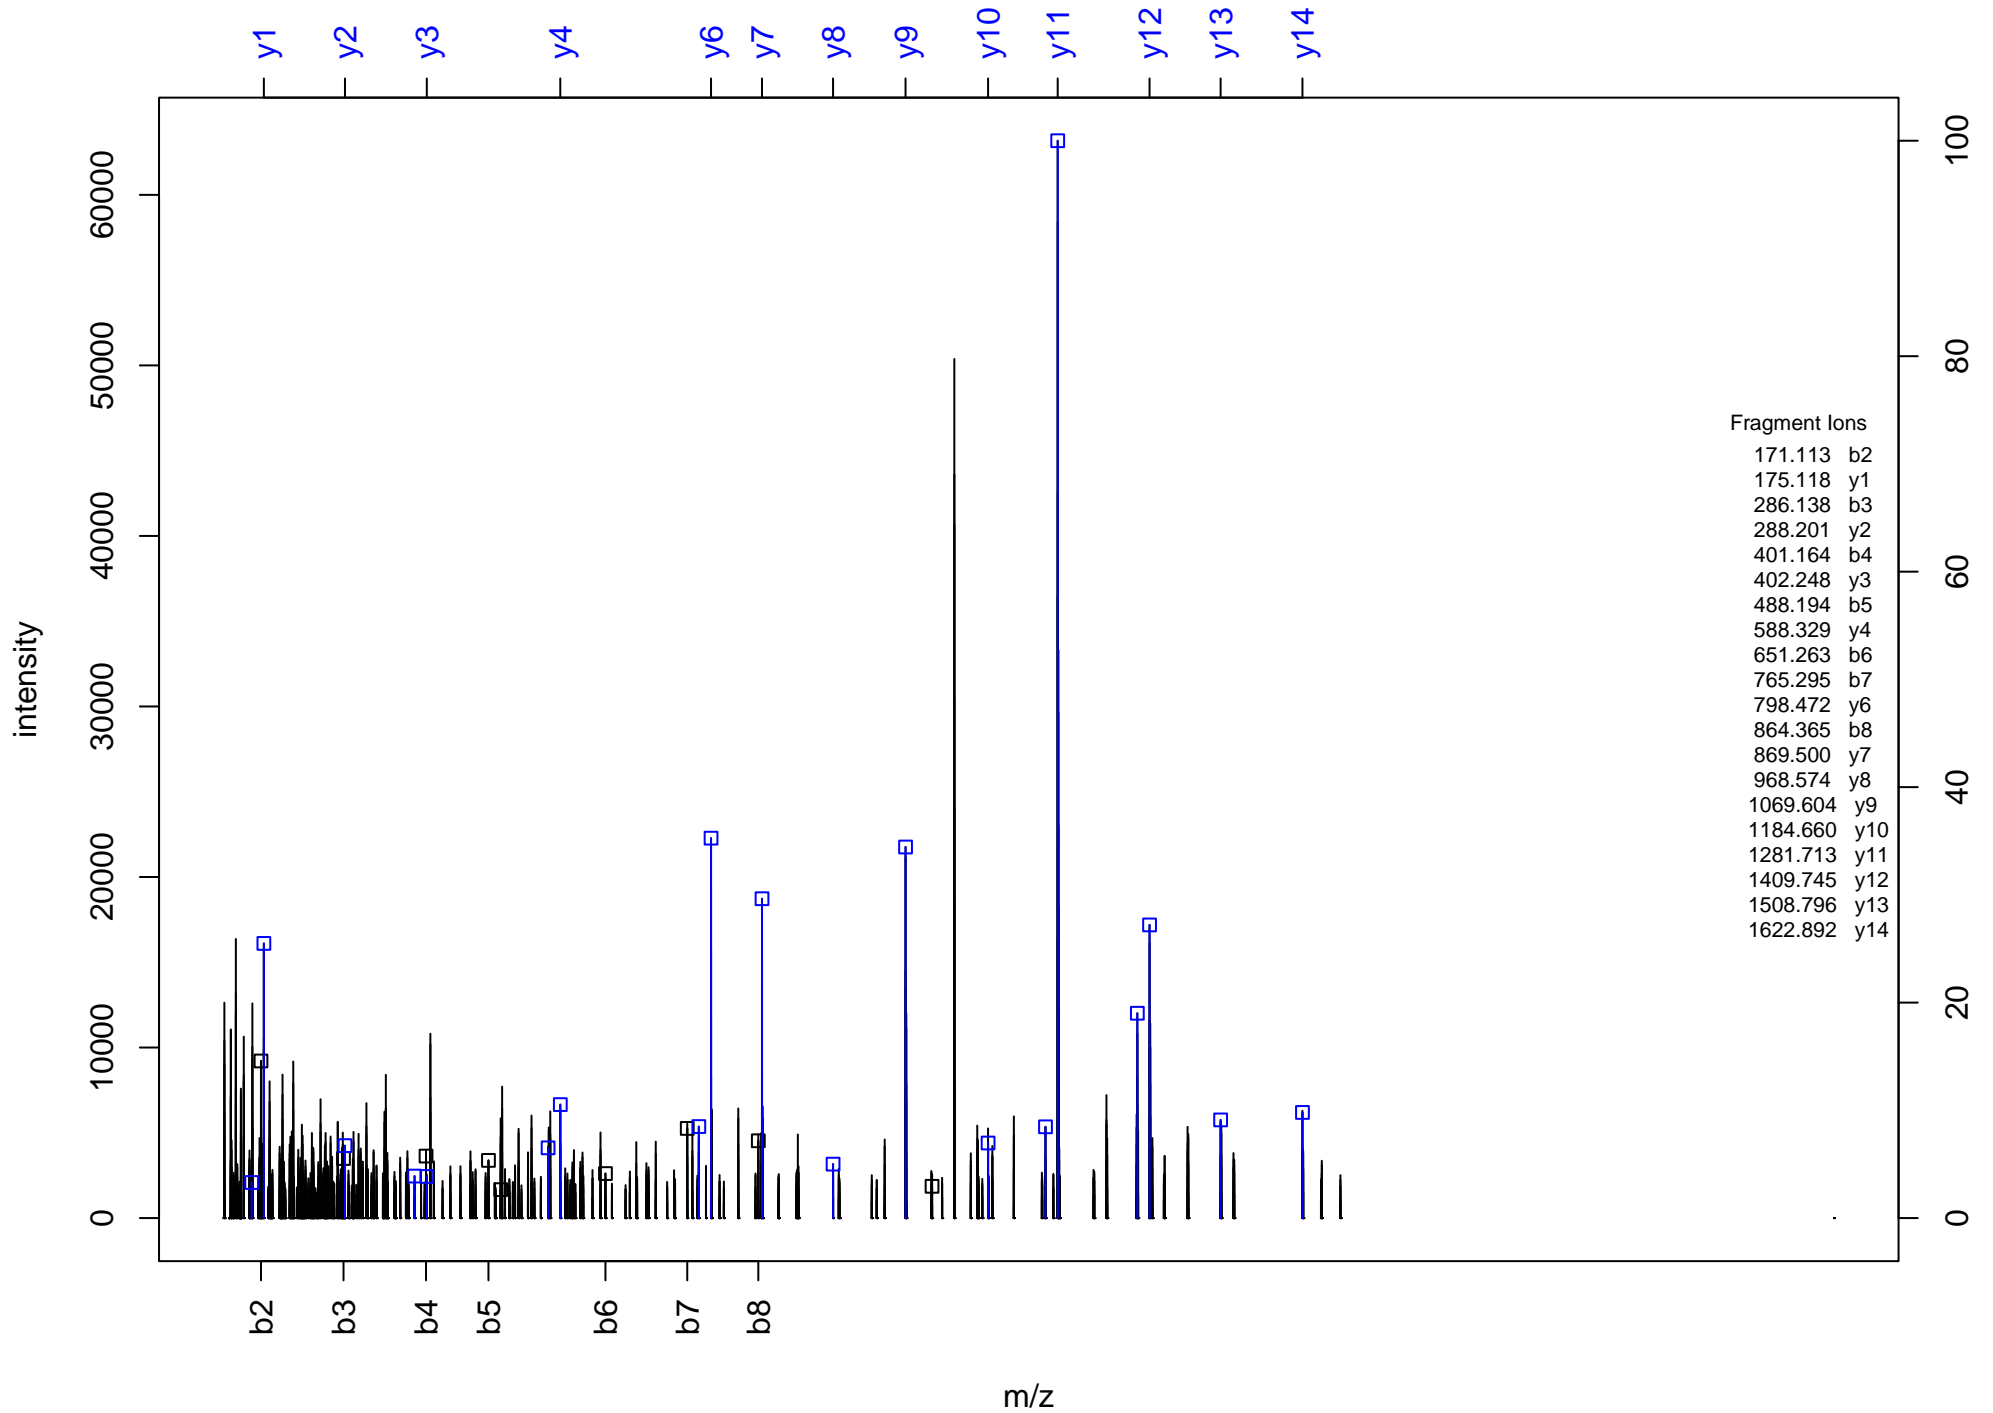

# (Ac)MEVSQAASGTDGVR

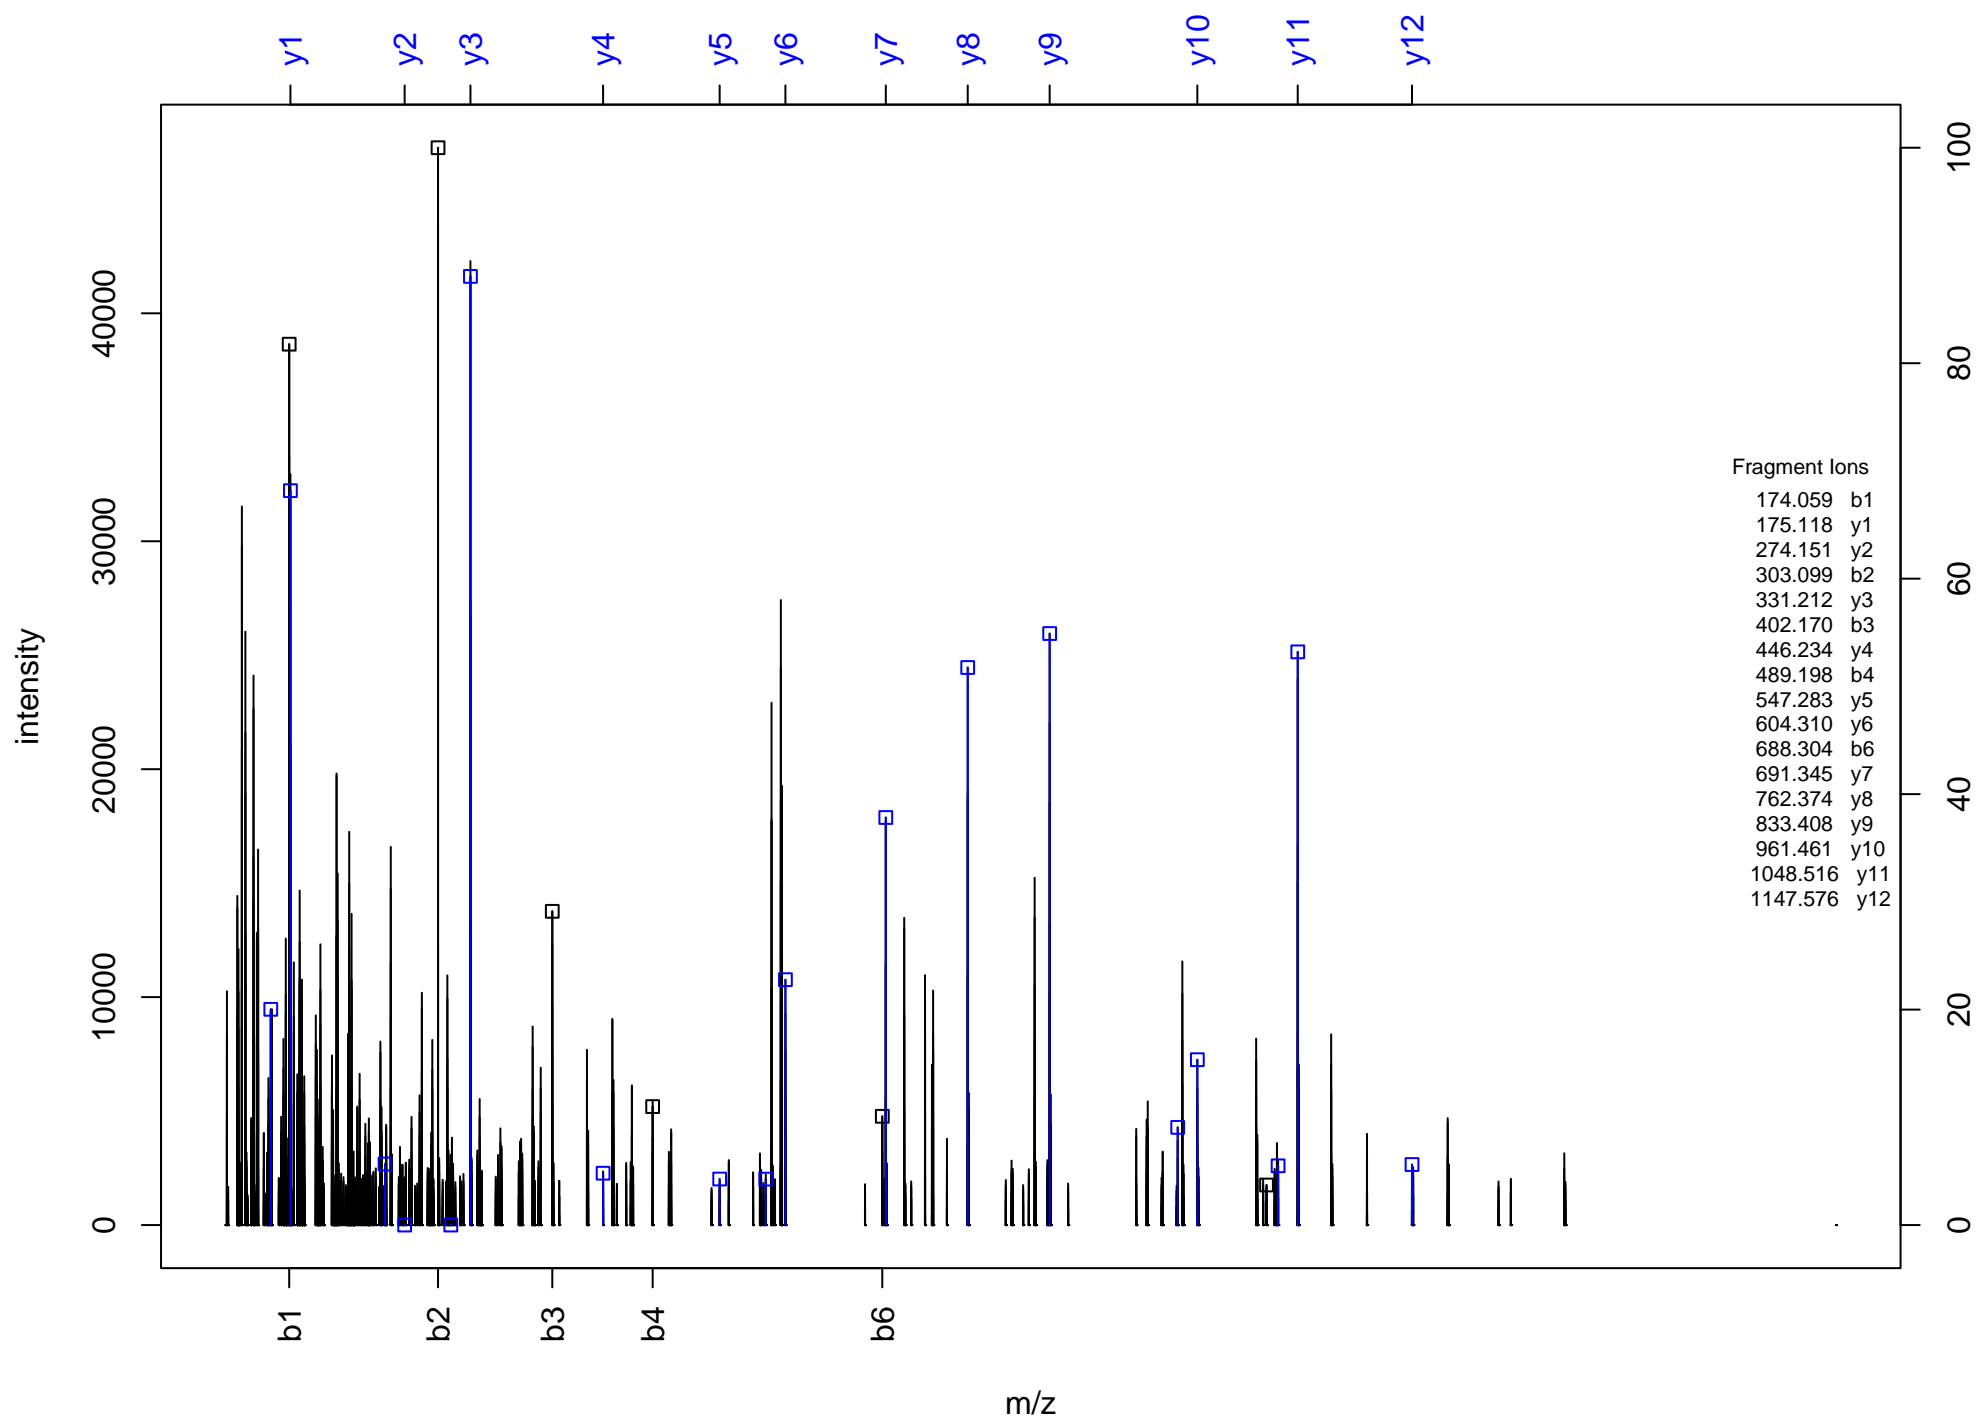



# TVSLNLSADEVTR

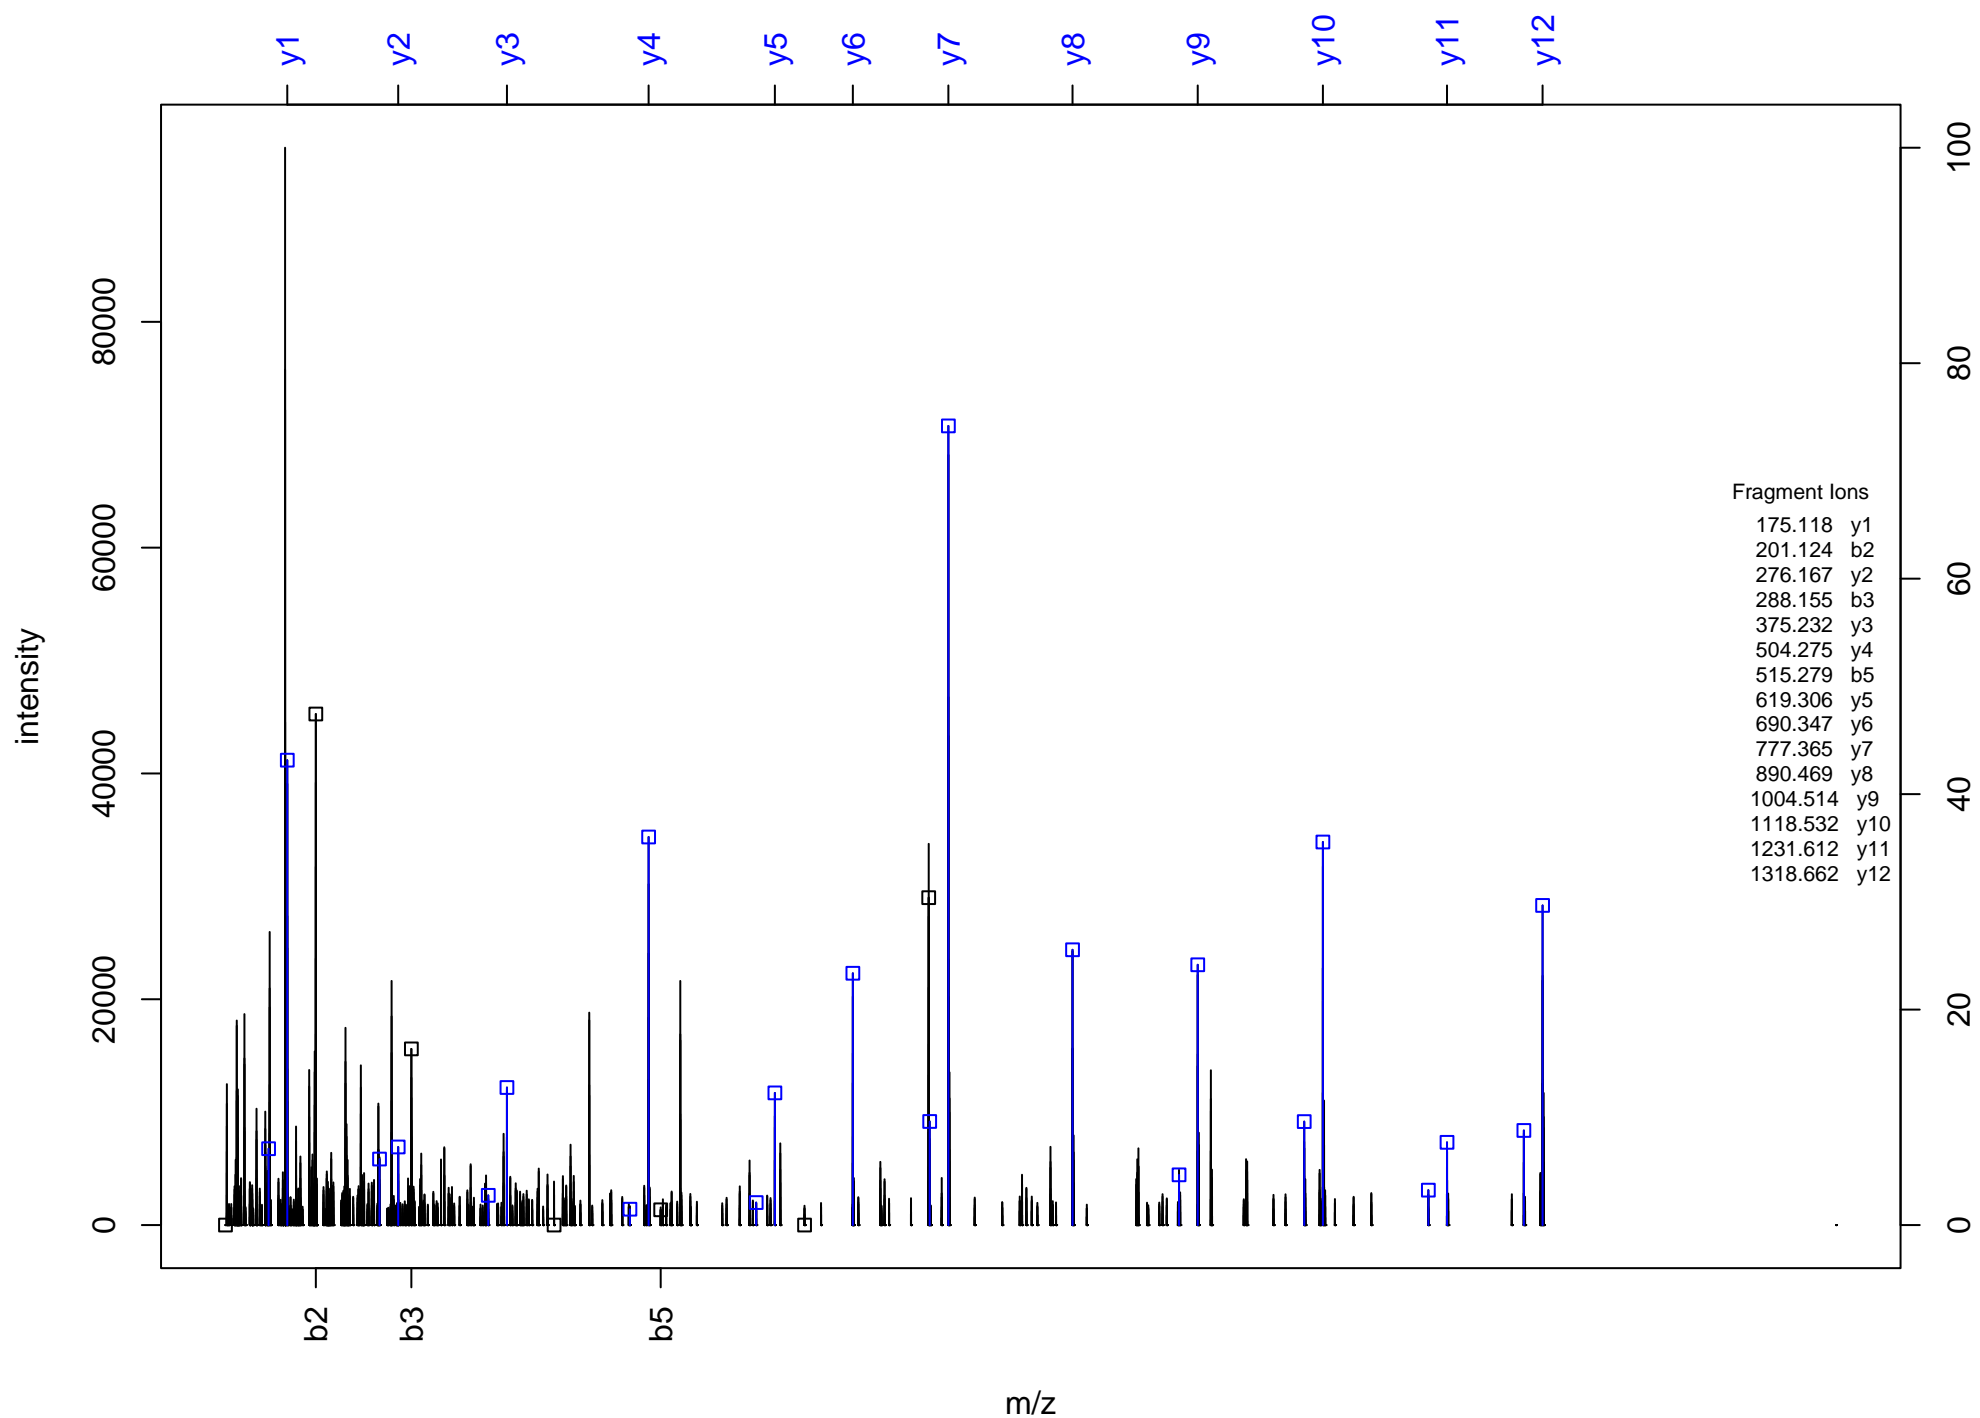

# GPSDFSGLPVGTYQAFPNIHPPQIPATPPSYESVDDINGDK

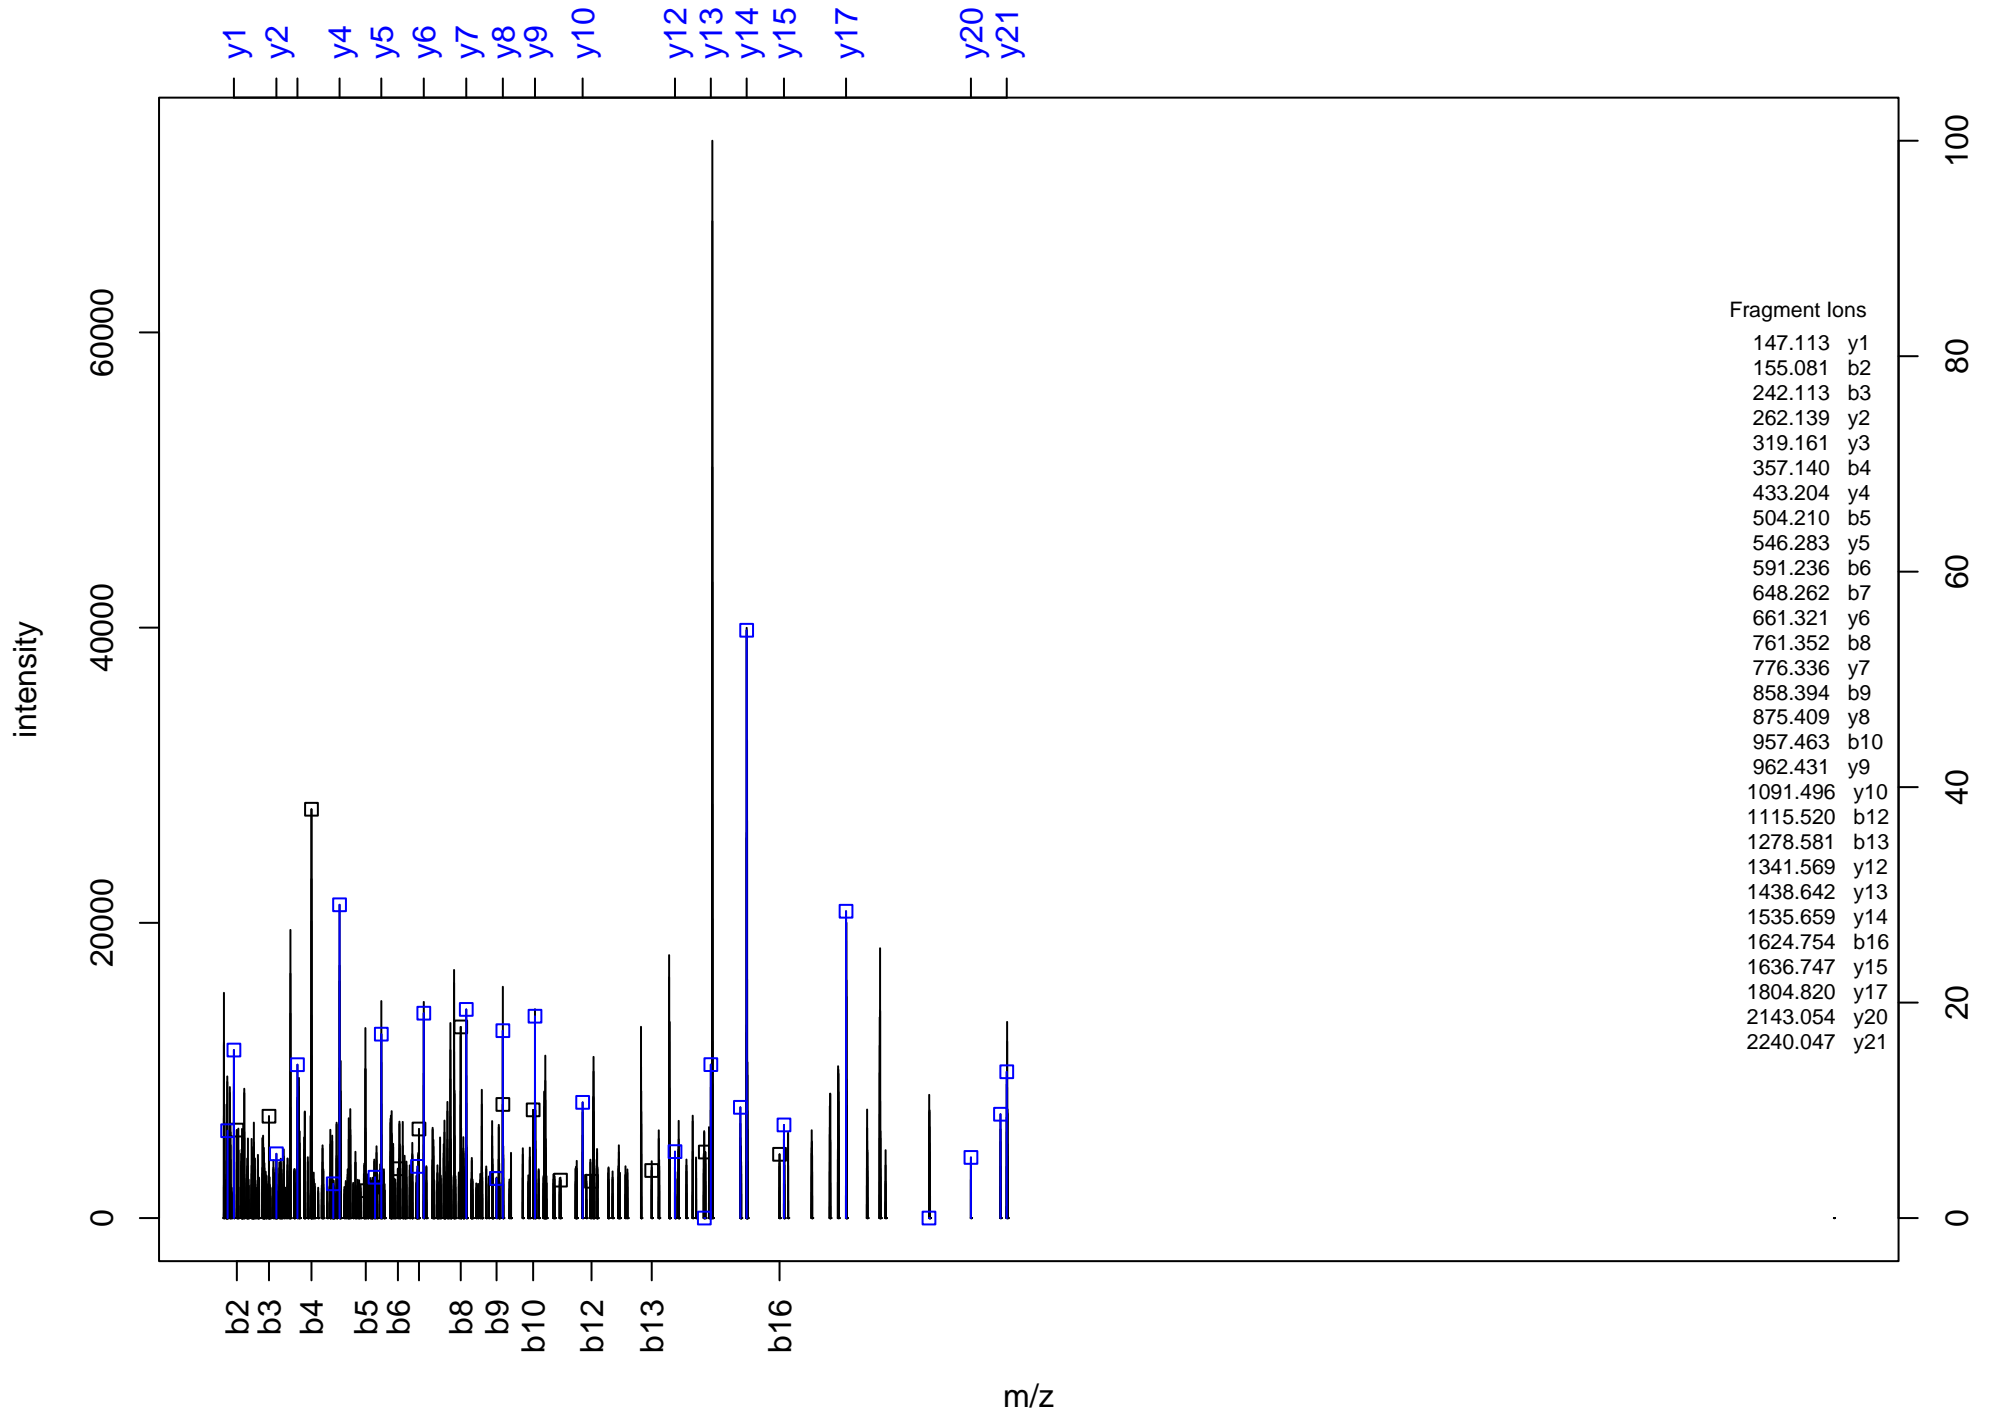

# ILESSQTLLSVLK

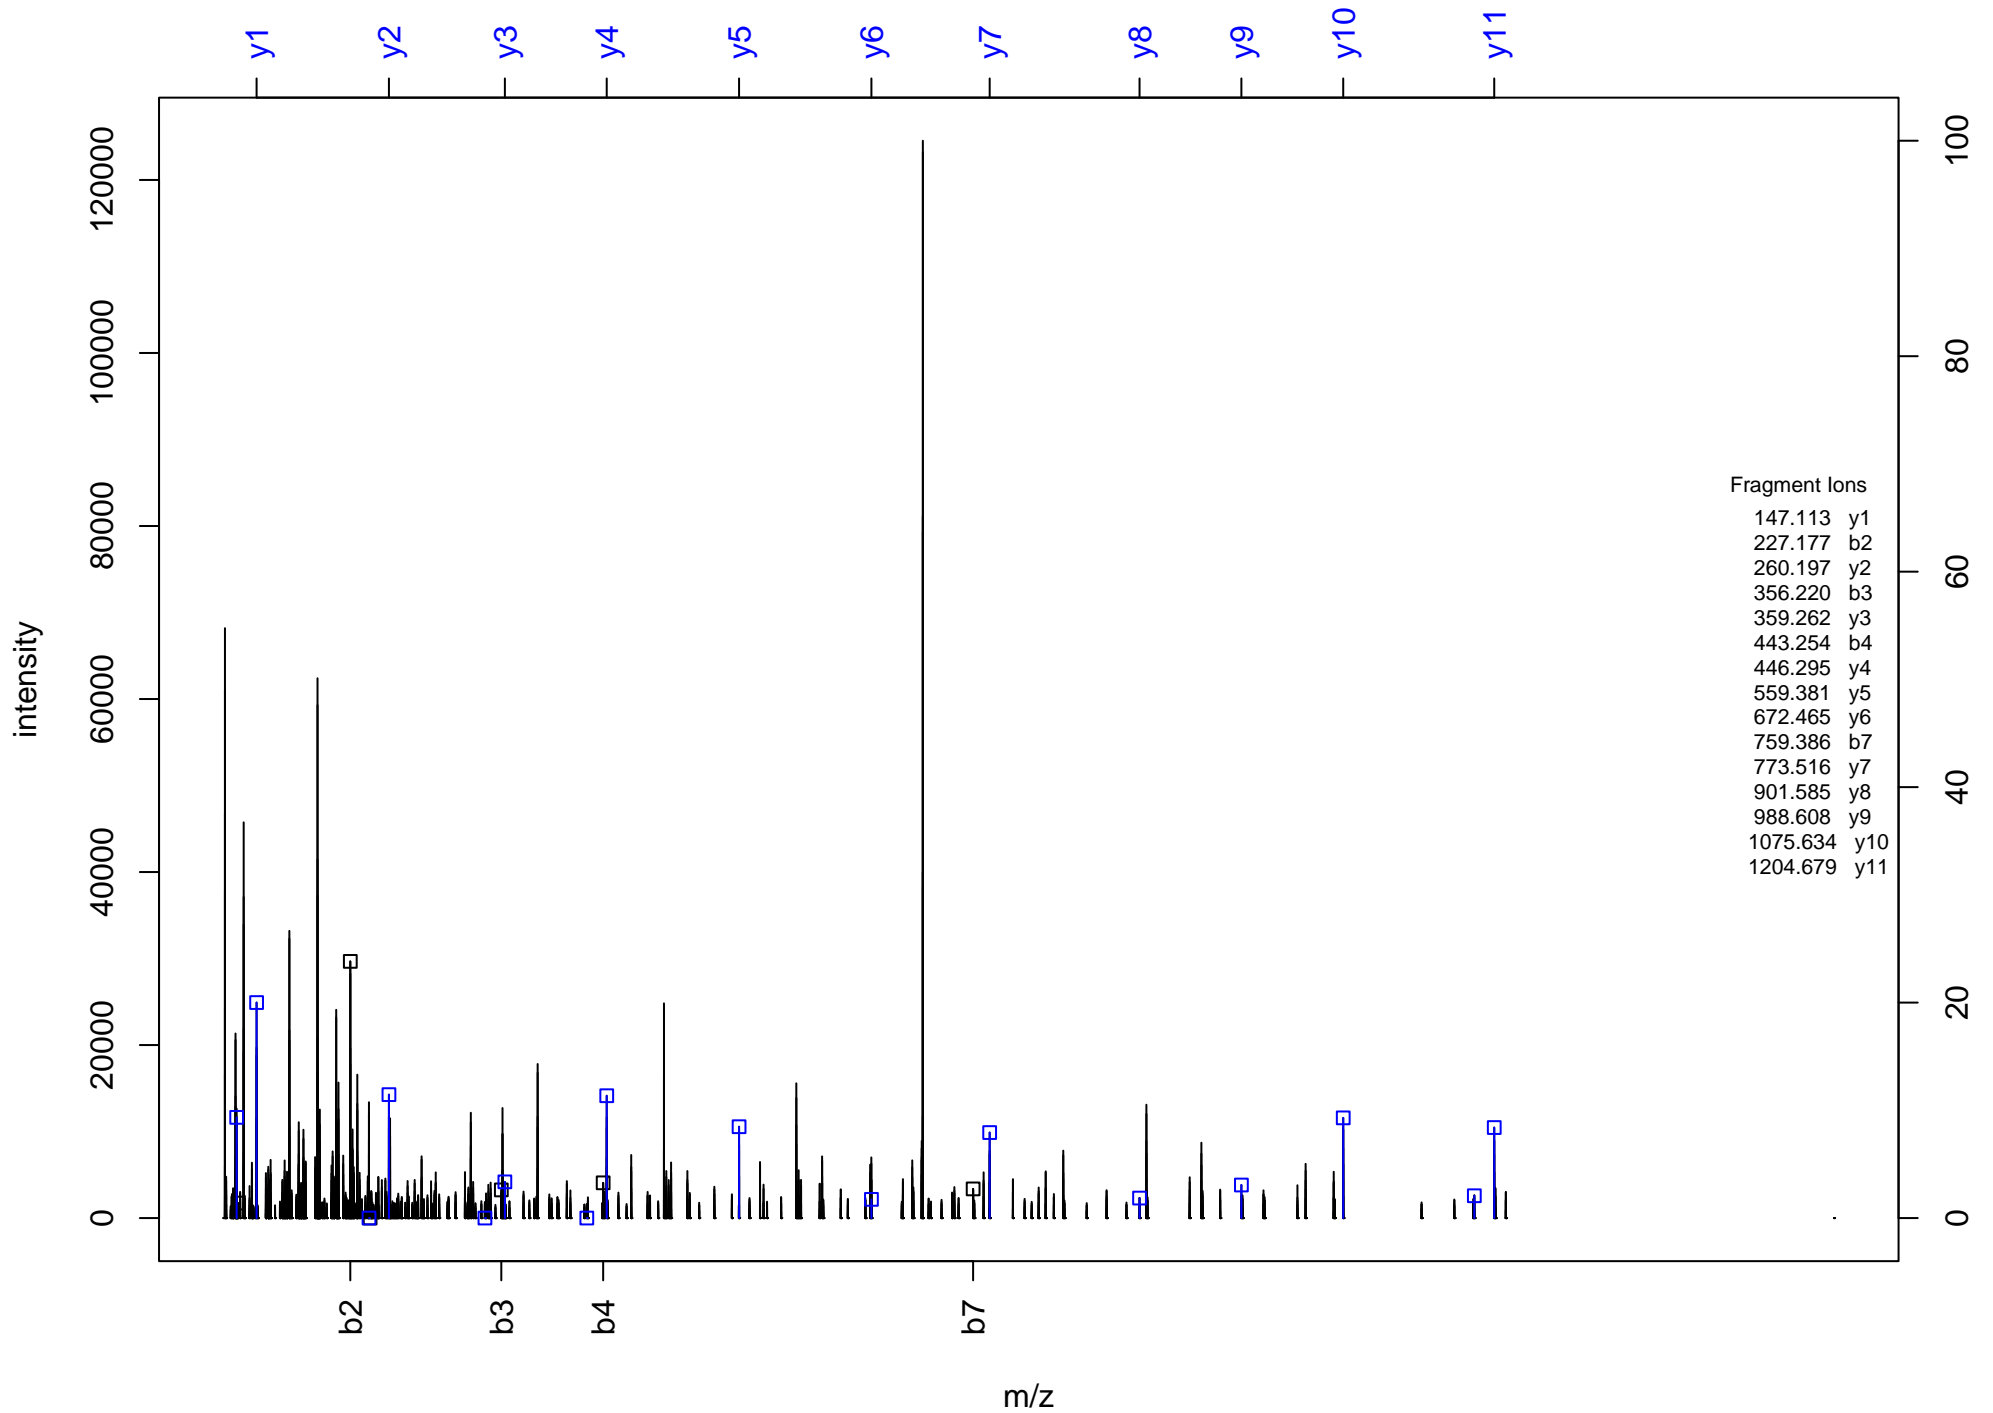

# ASDPPLAPDDDDPDAPAAQLAR

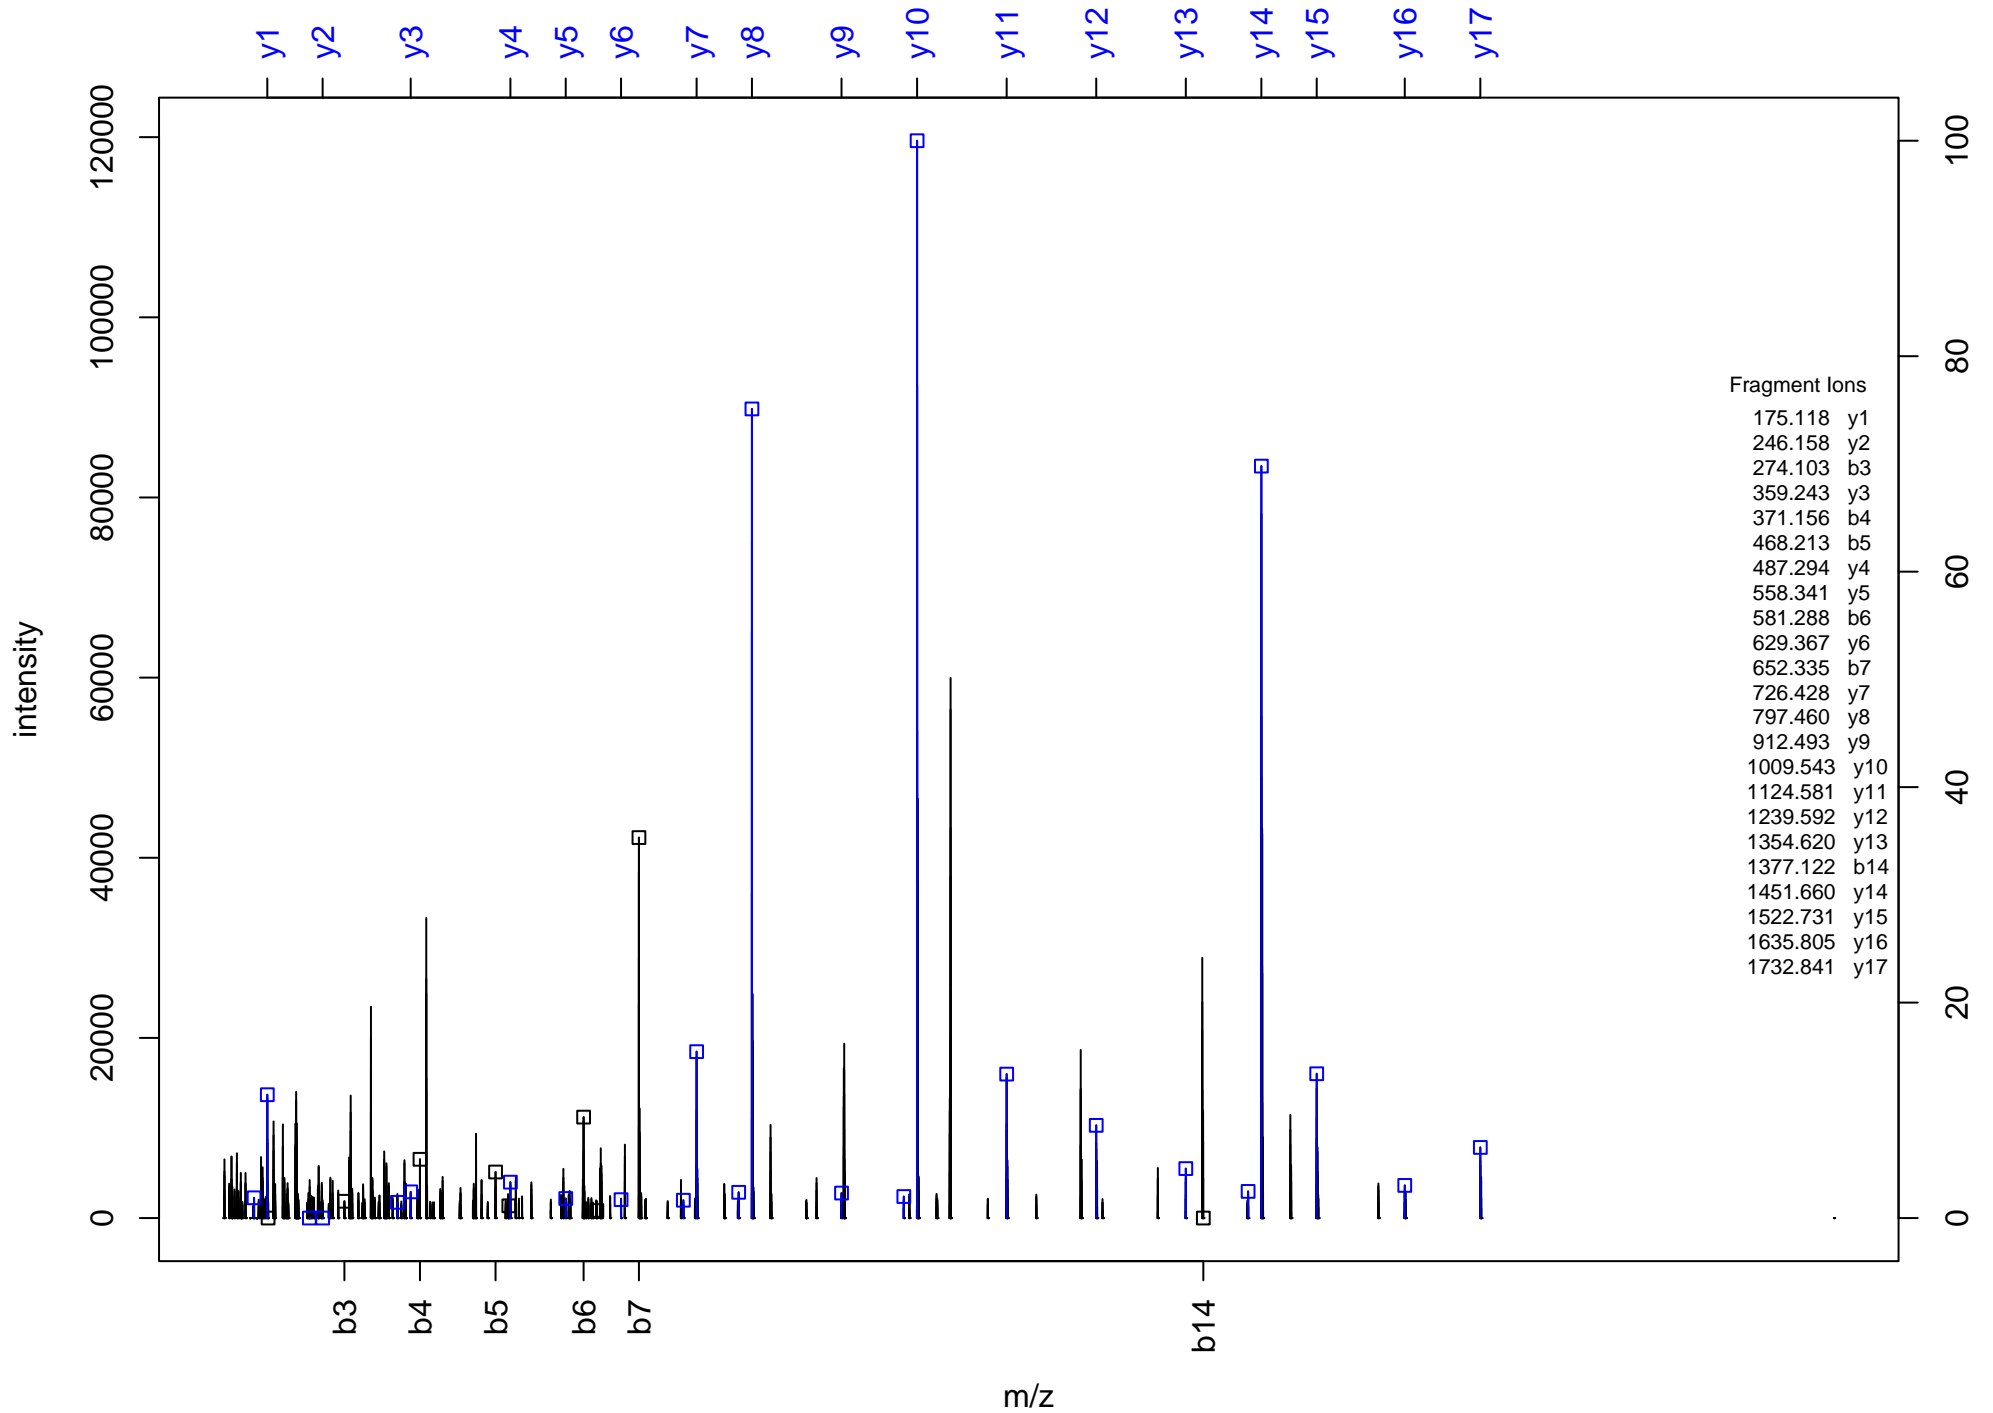

# GHESEVFIKAWNPVSDLLASGSGDSTAR

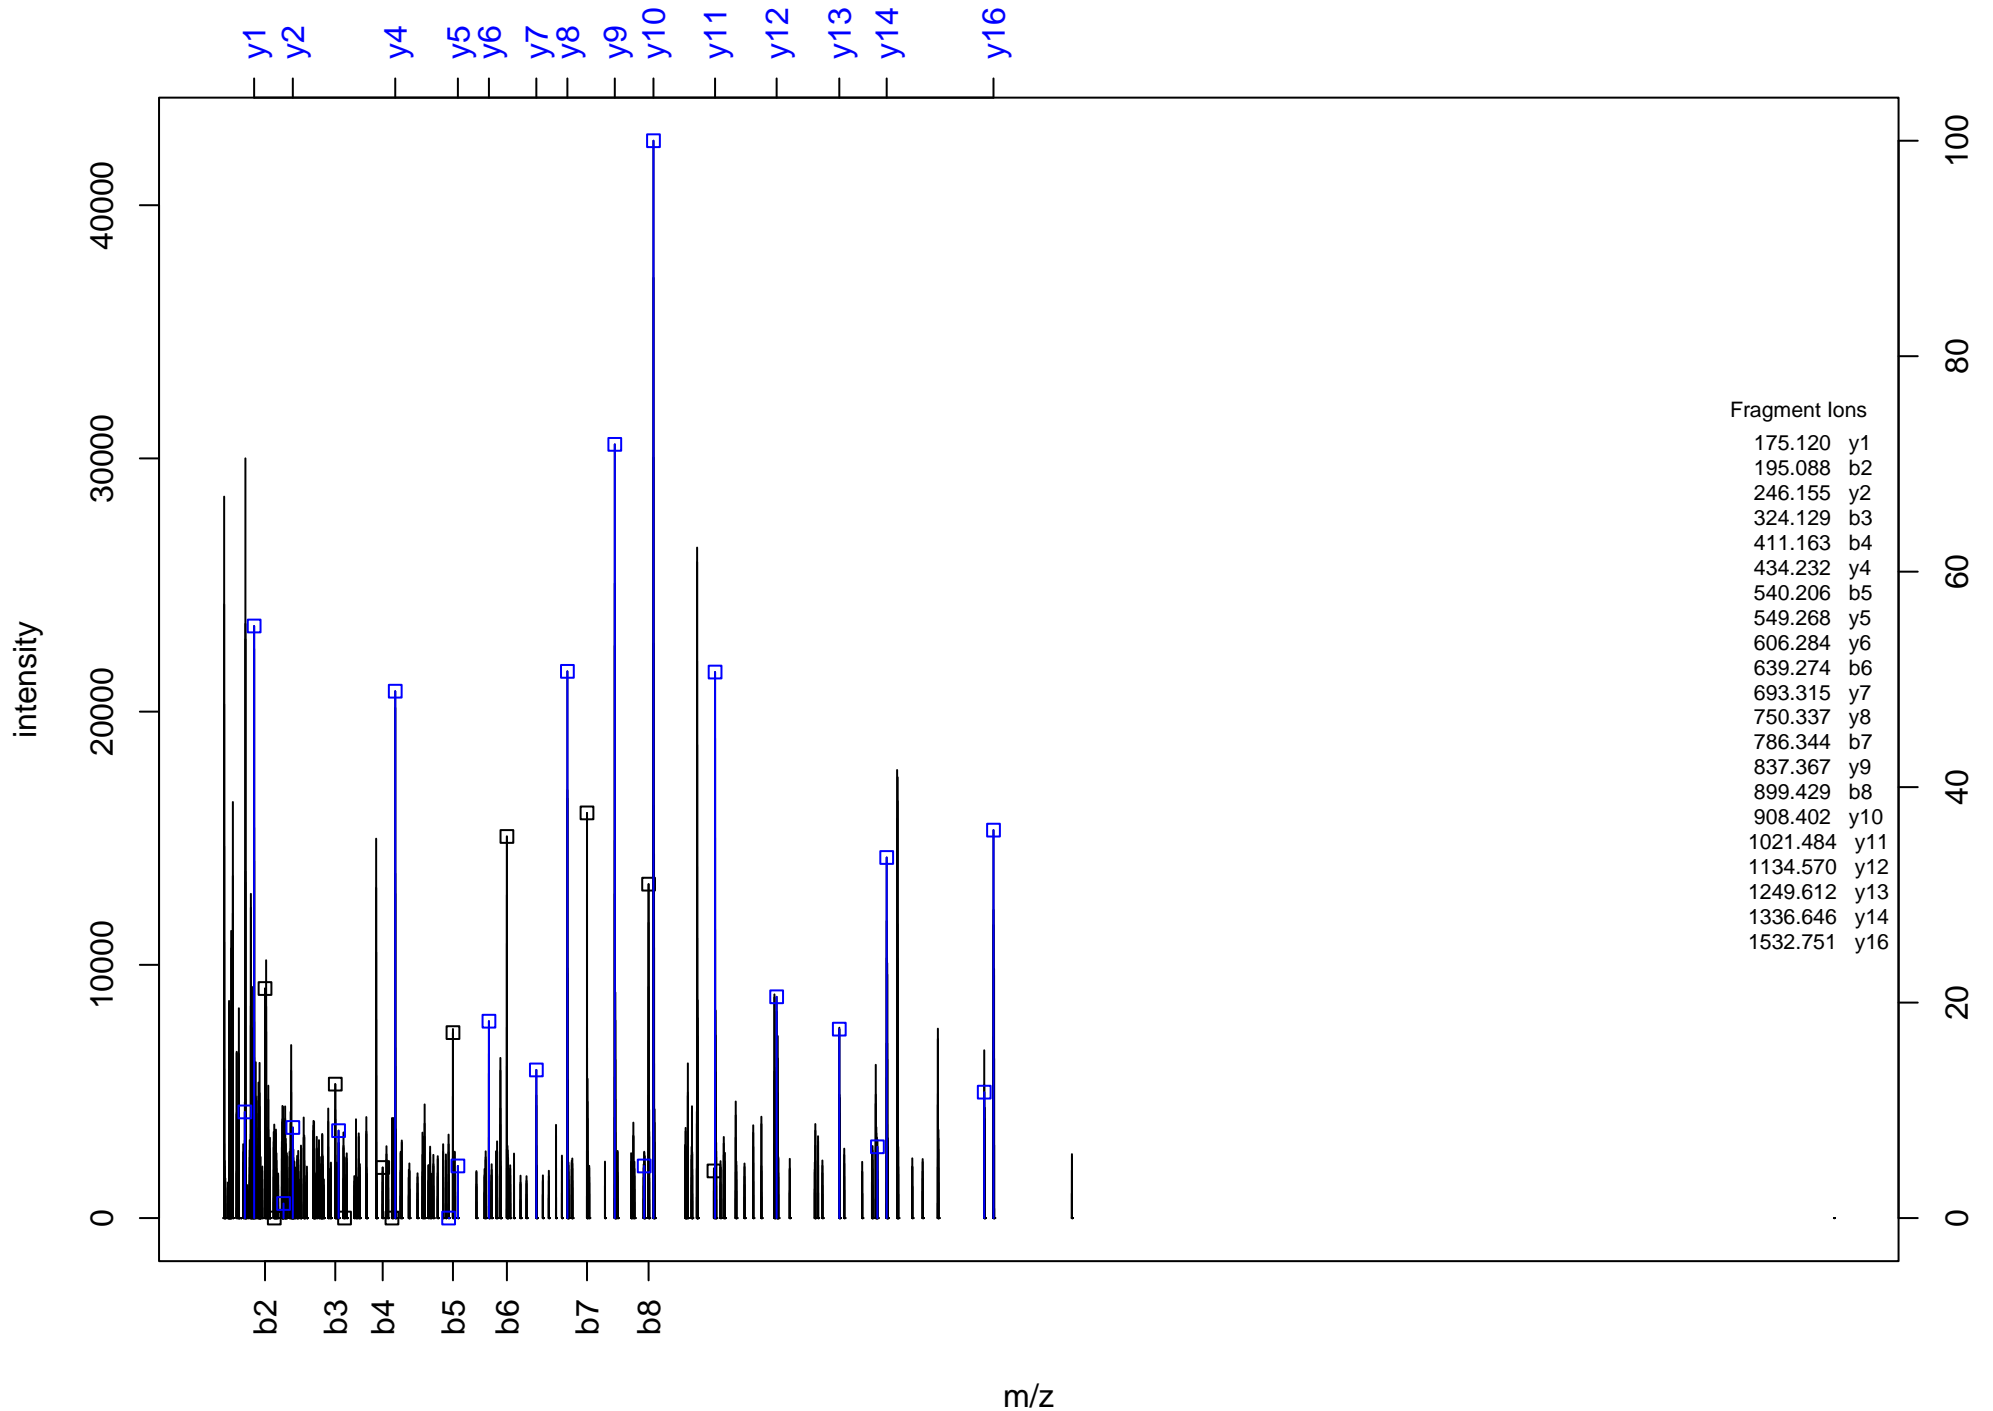

# WDYPEGTPSGGSSTLPSAPPPASAGLK

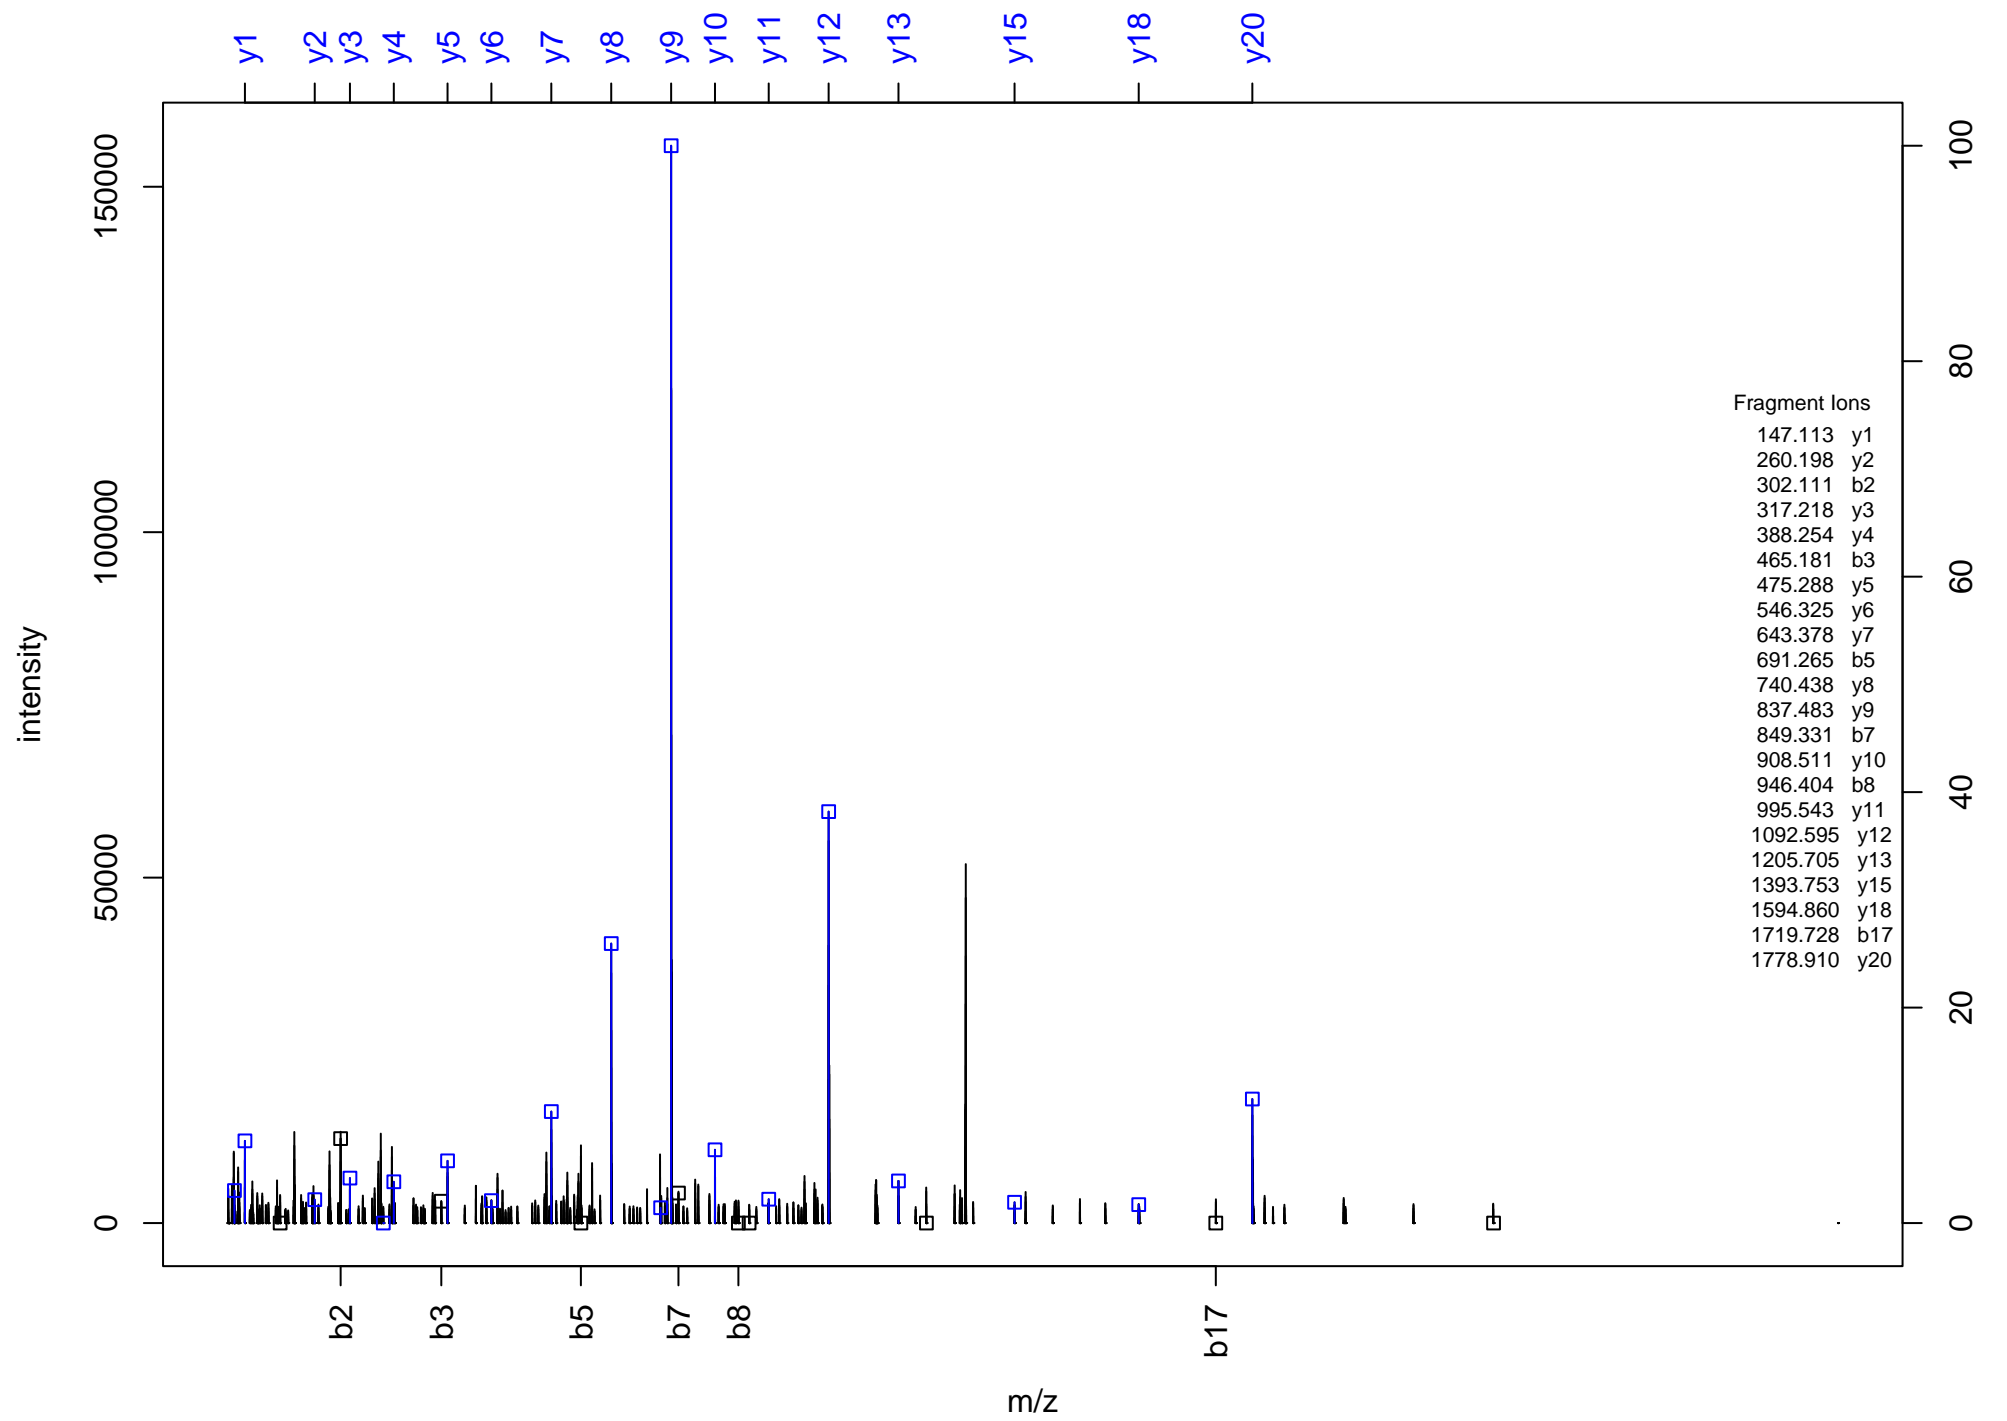

# YFPPLGSIMILER

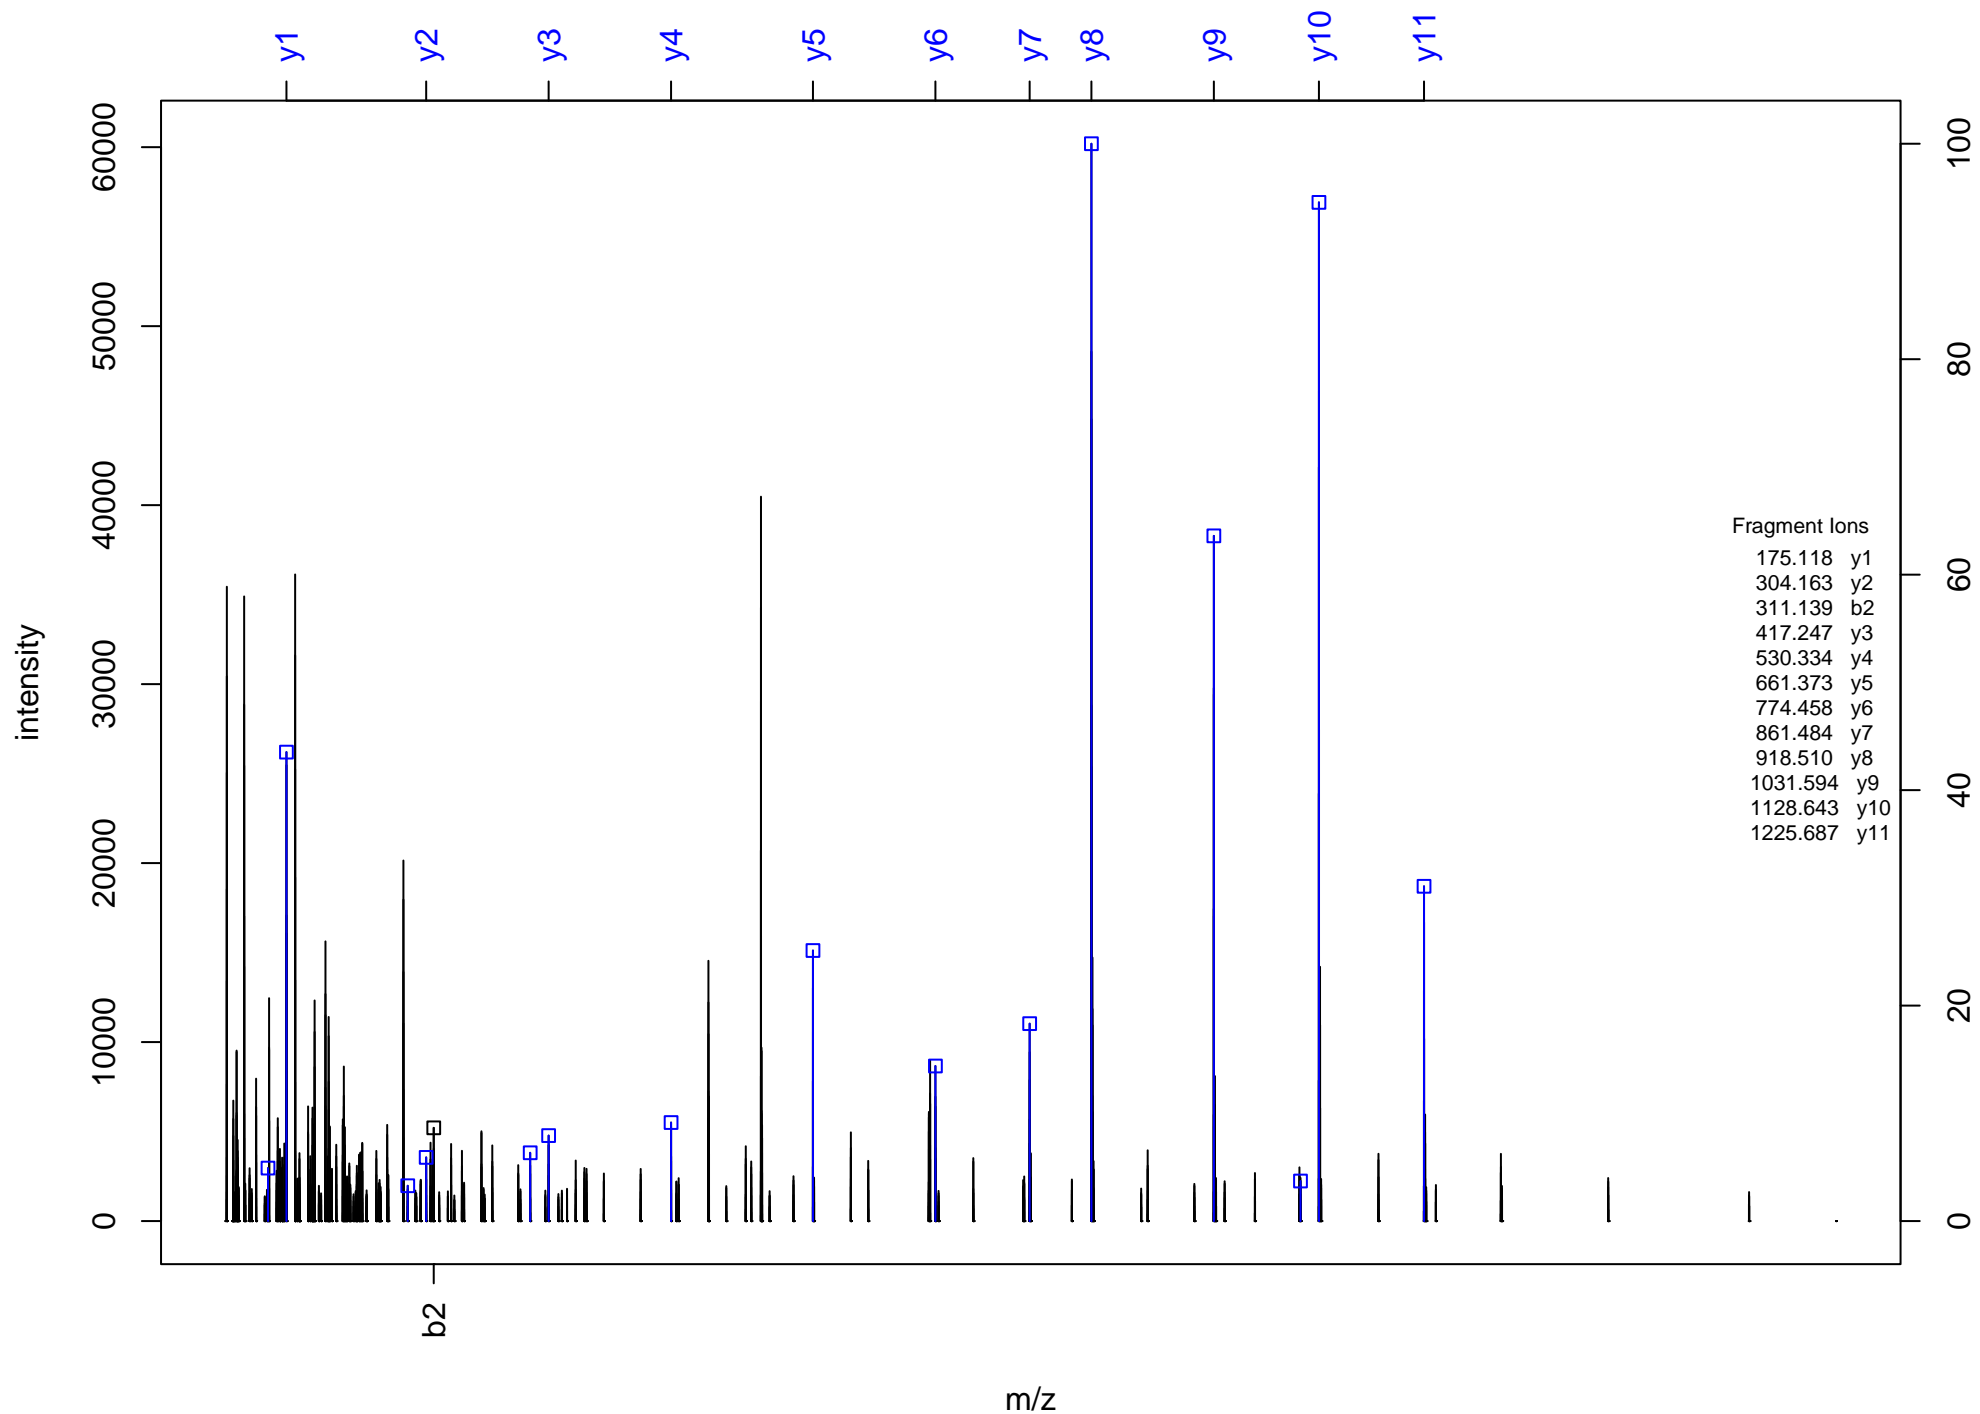

# DEADVALLPTIVEK

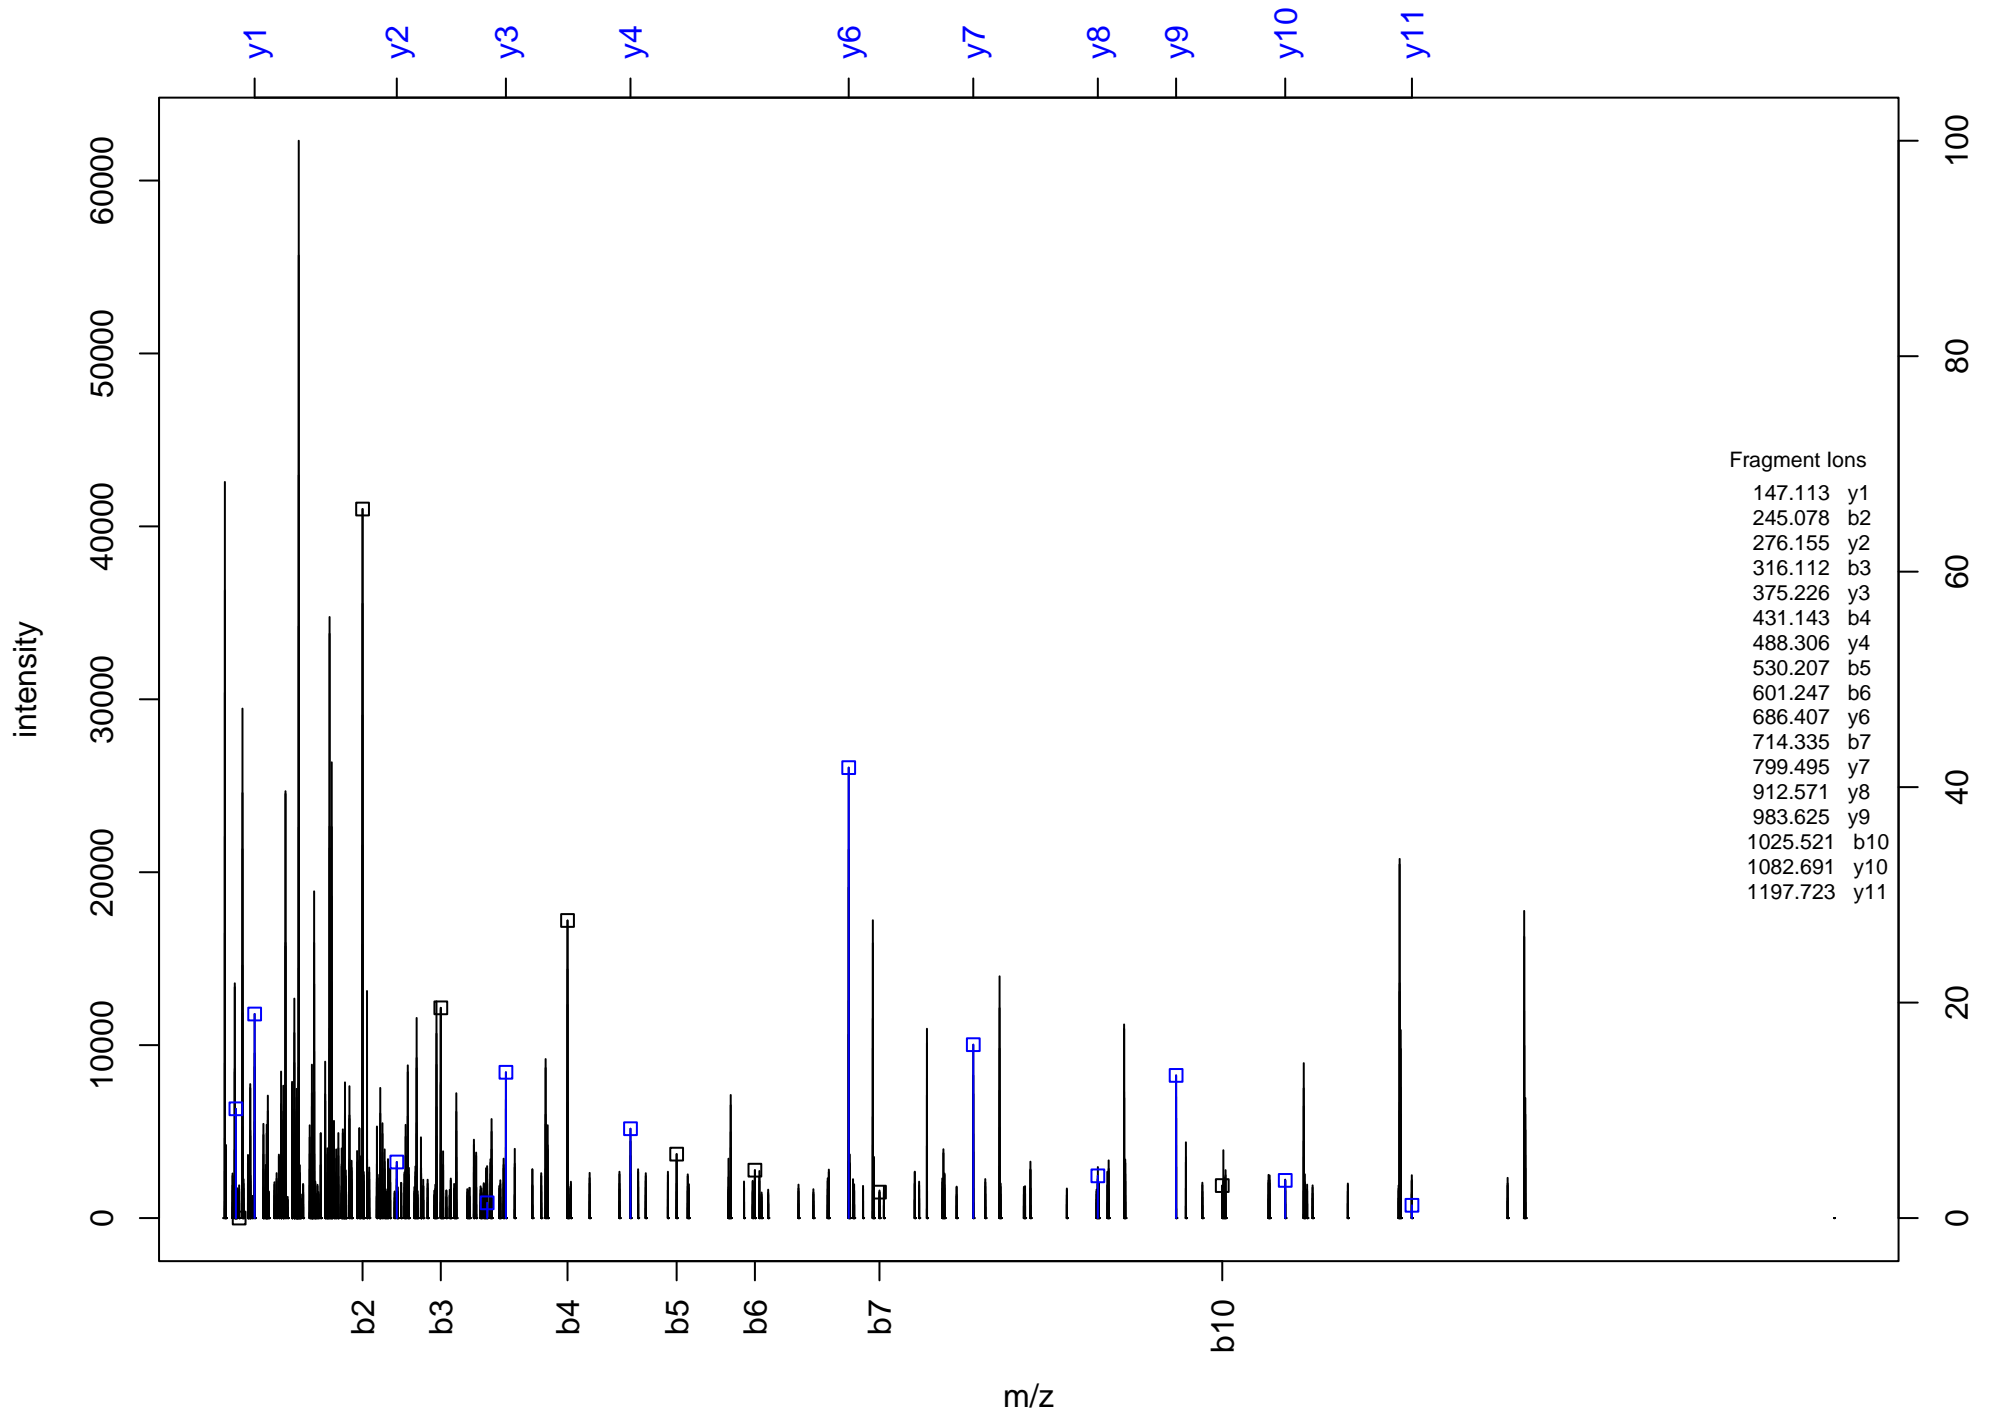



# TLYDFPGNDAEDLPFK

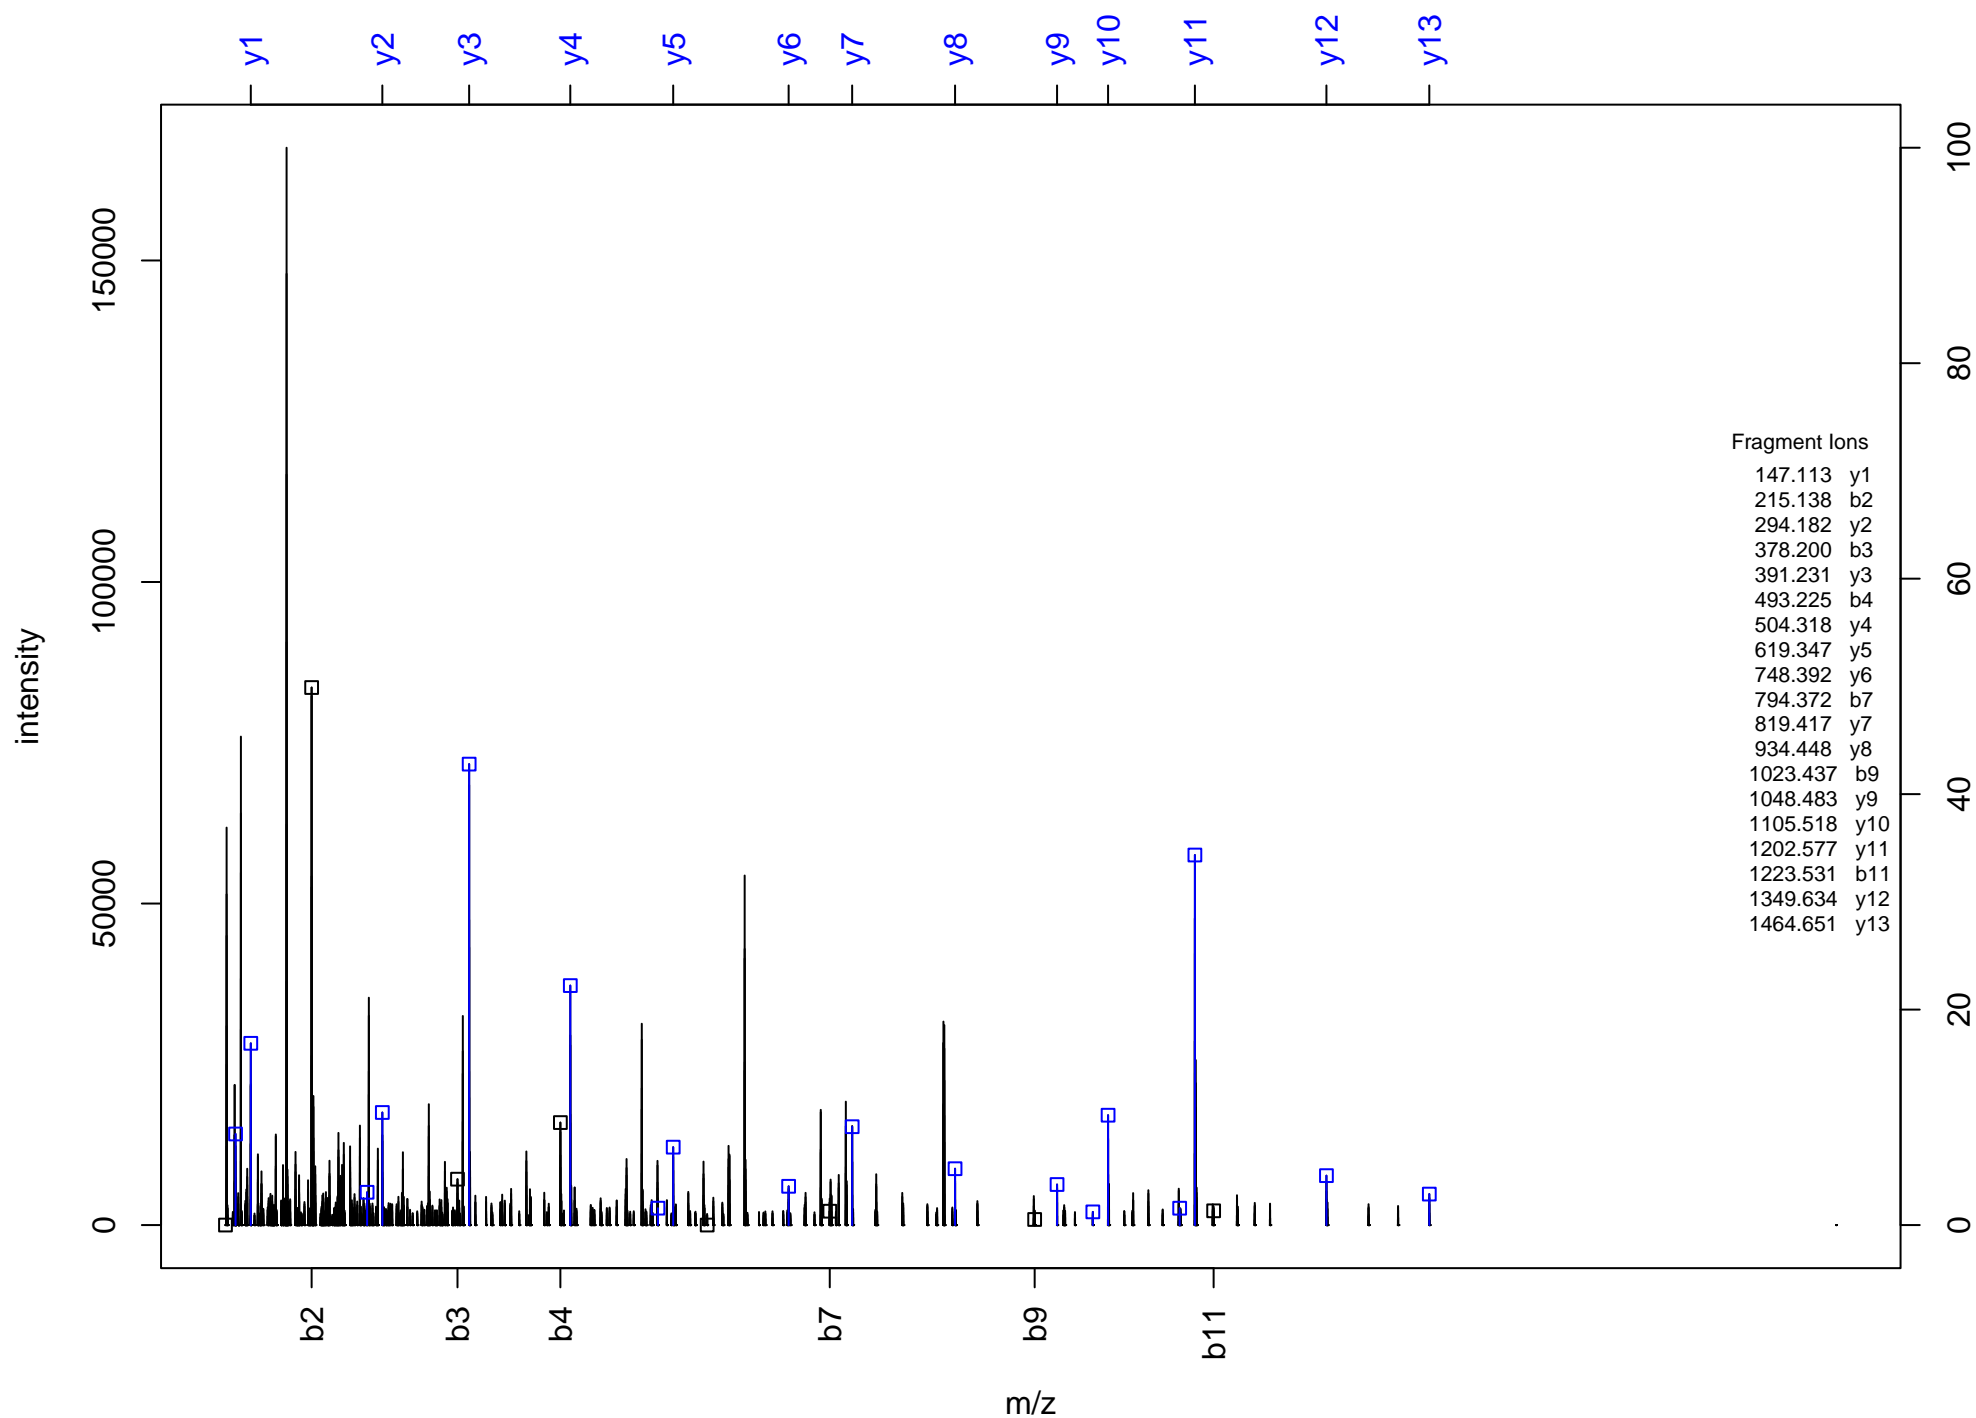

# QADVADQQTTTELPAEN^GETENQSPASEEEK

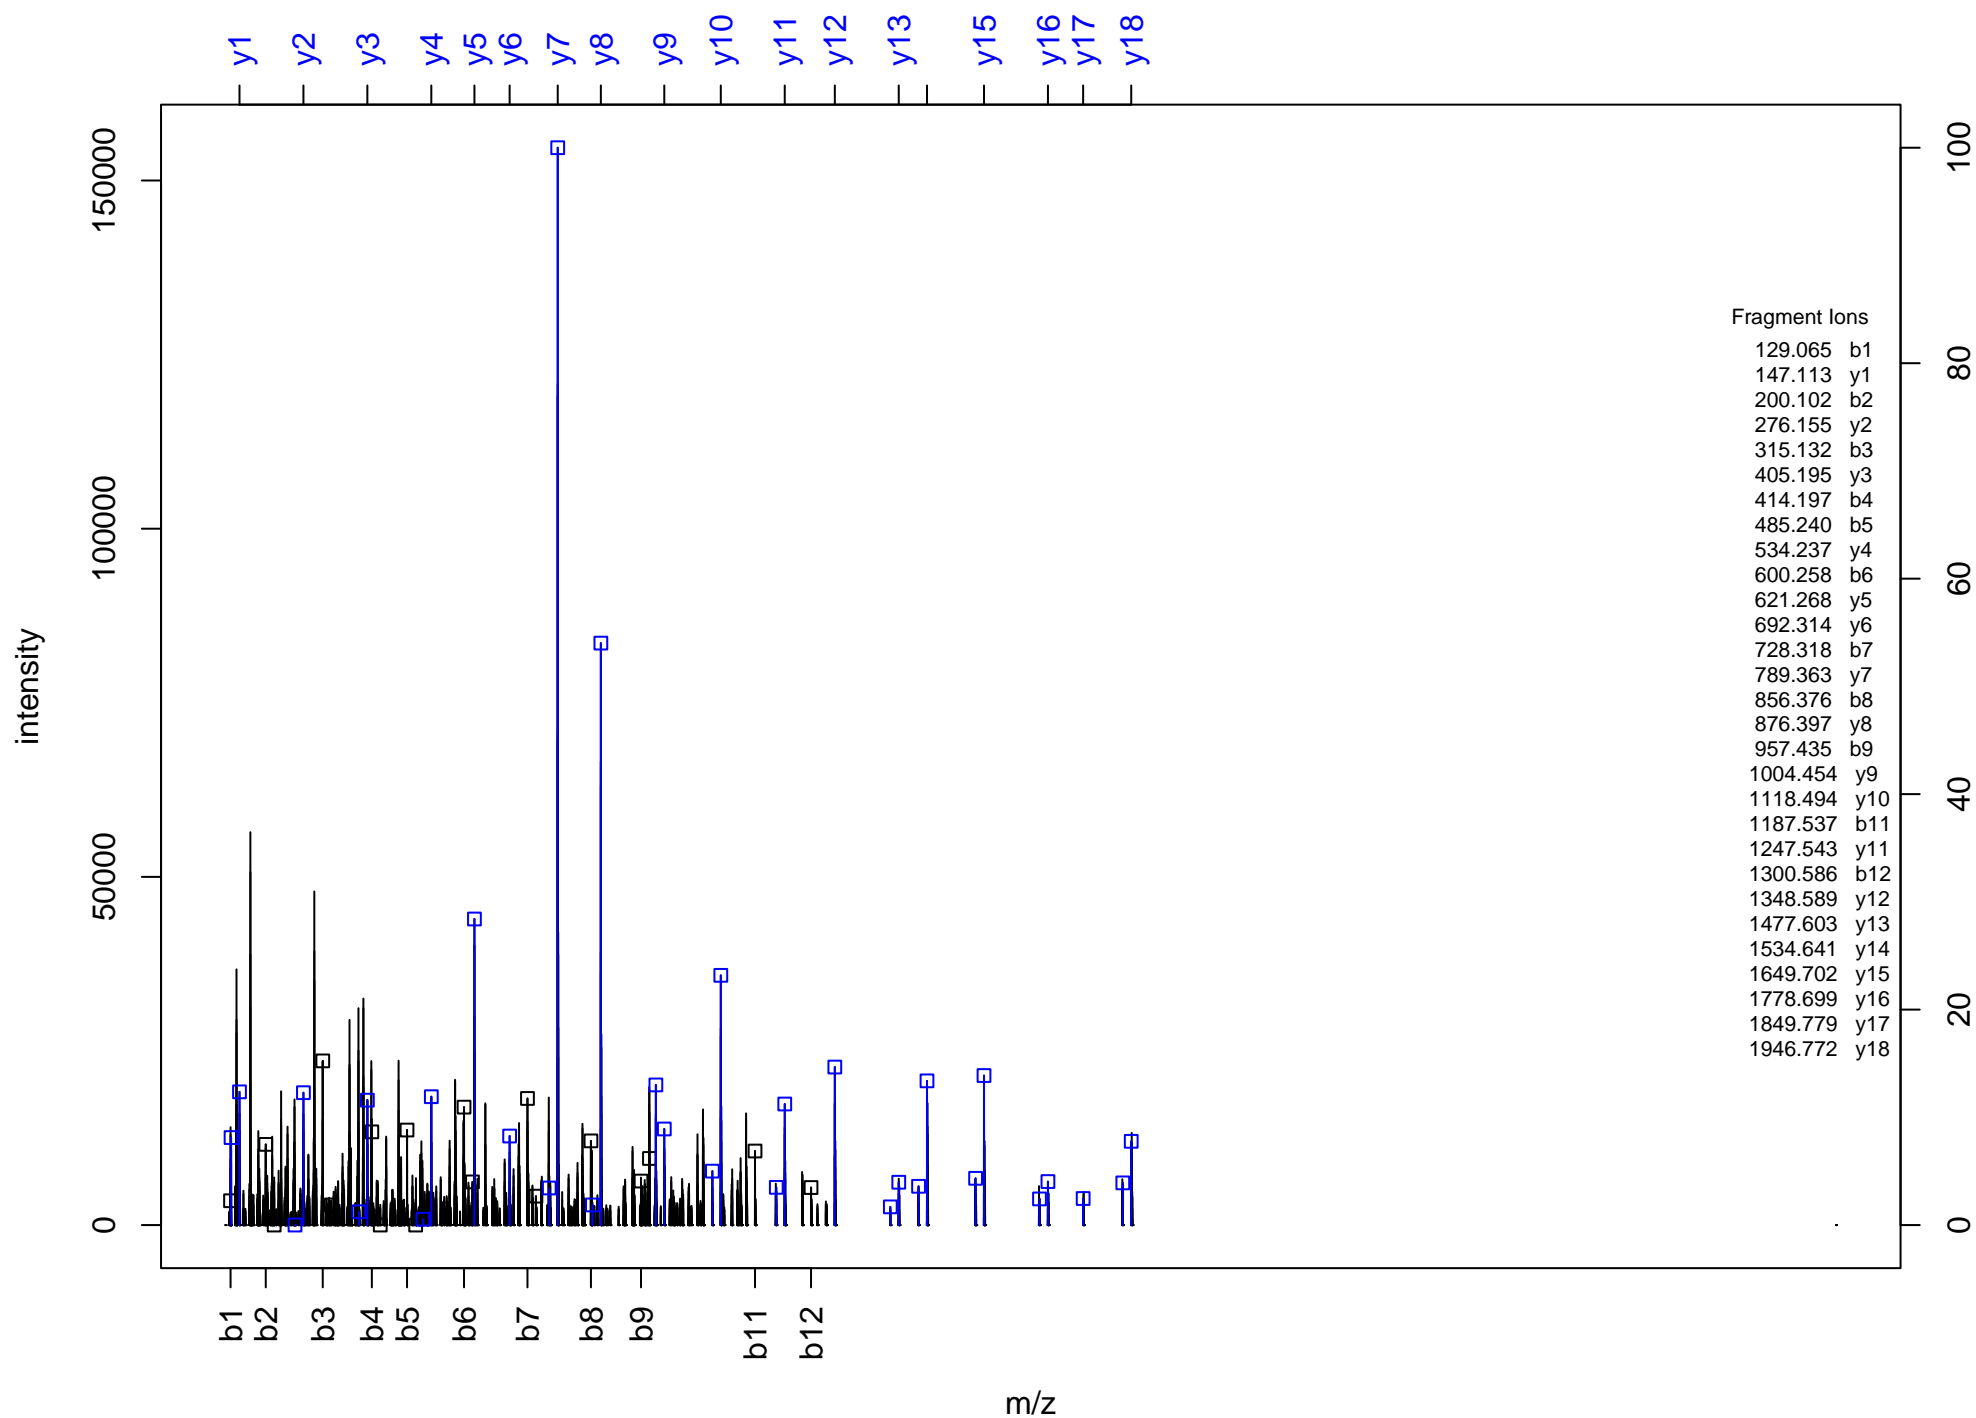

# AFGAPVPSVQWLDEEGTTVLQDER

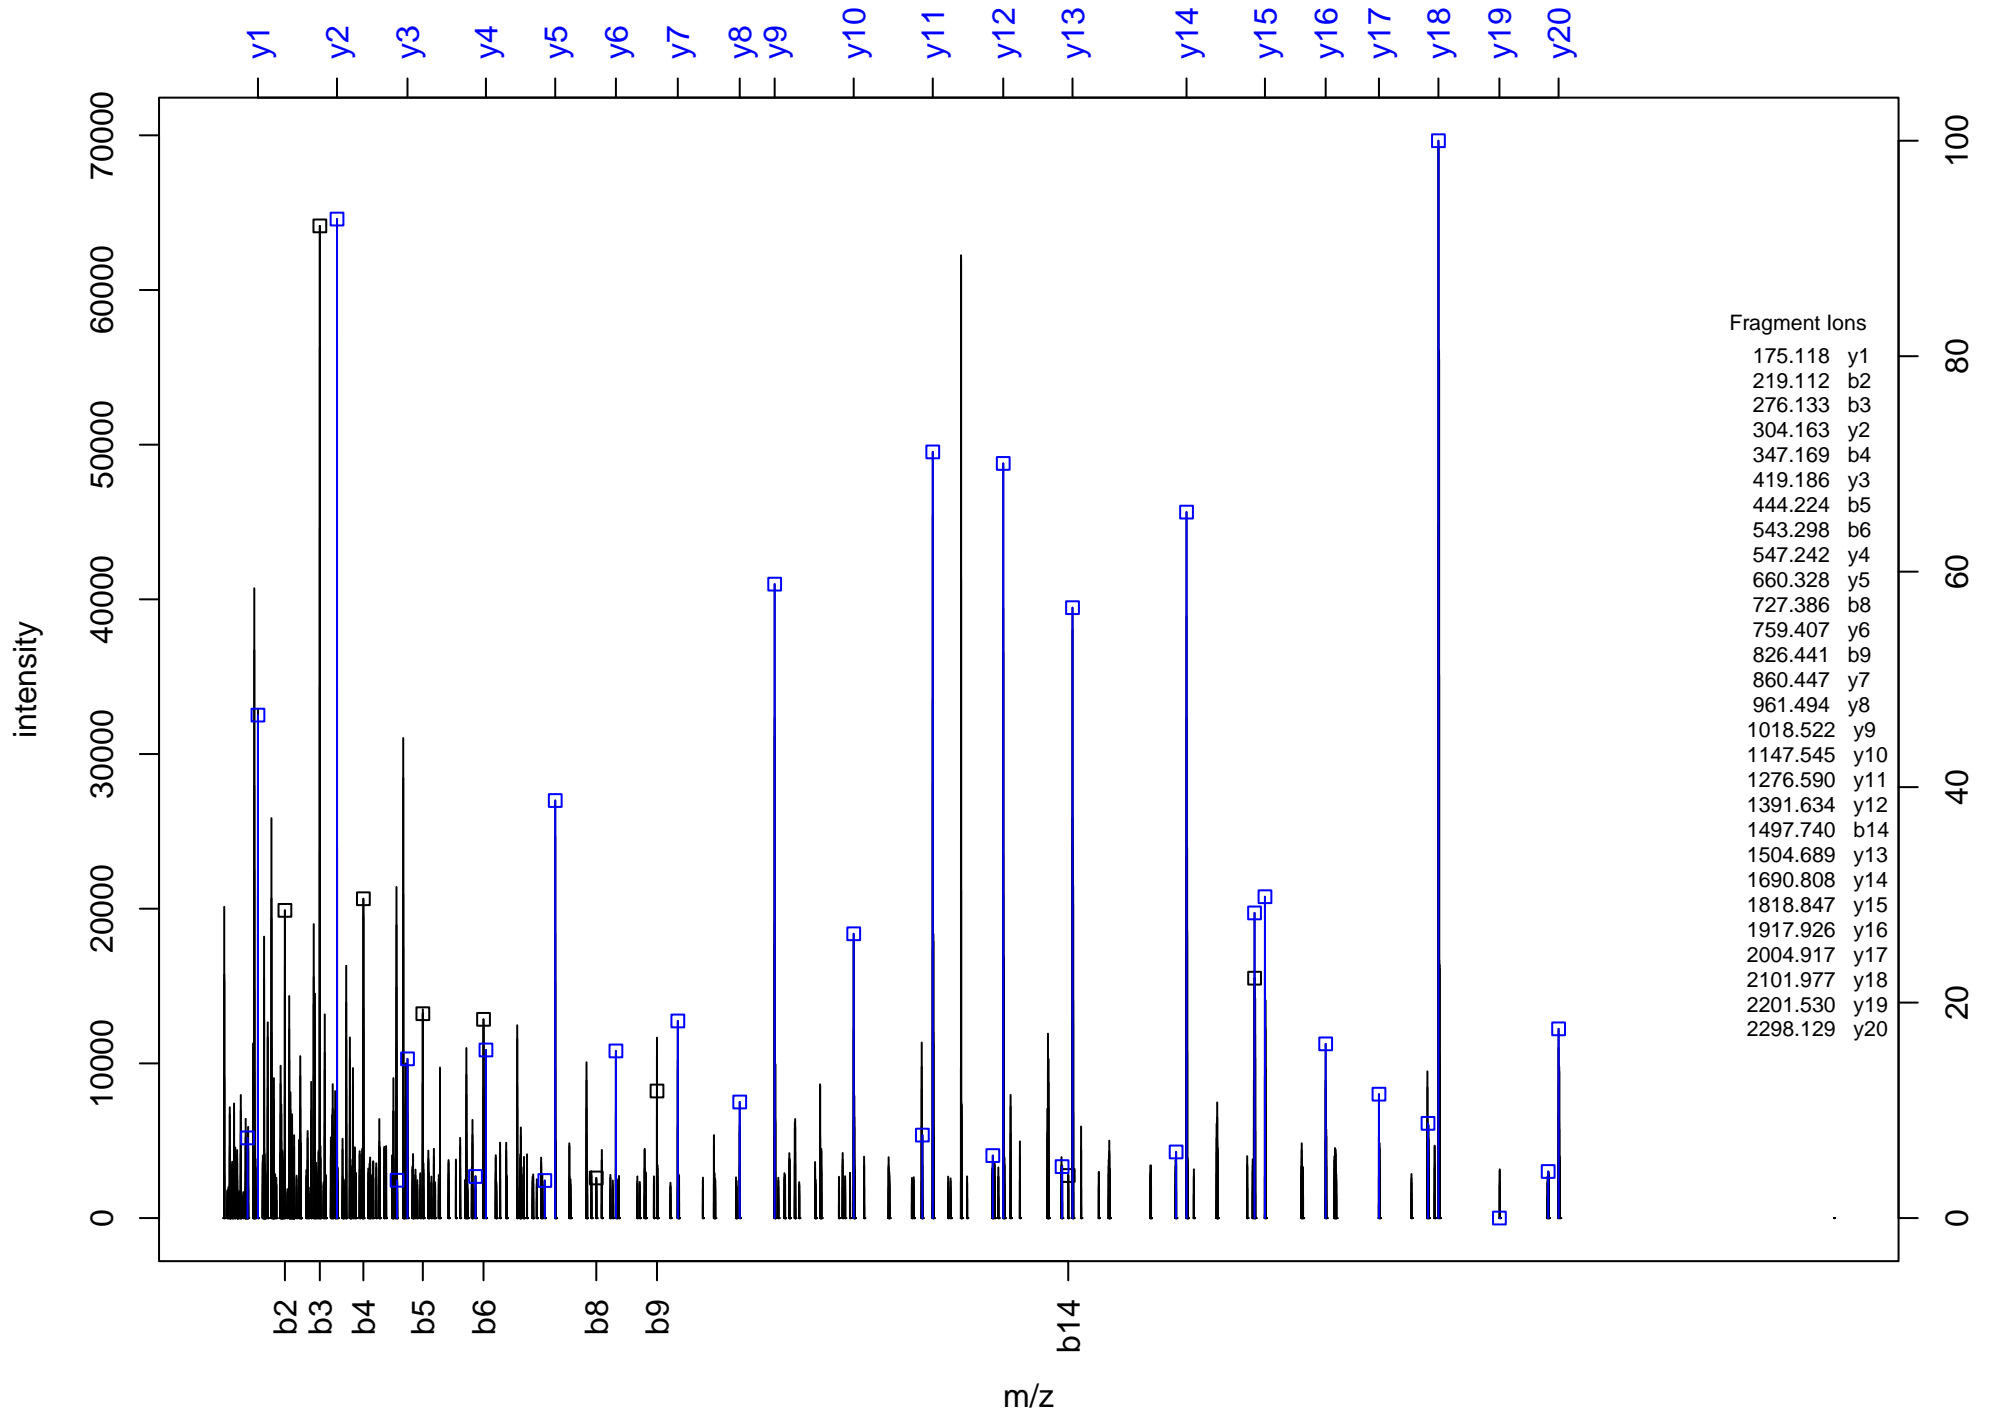

# STIWQFFSR

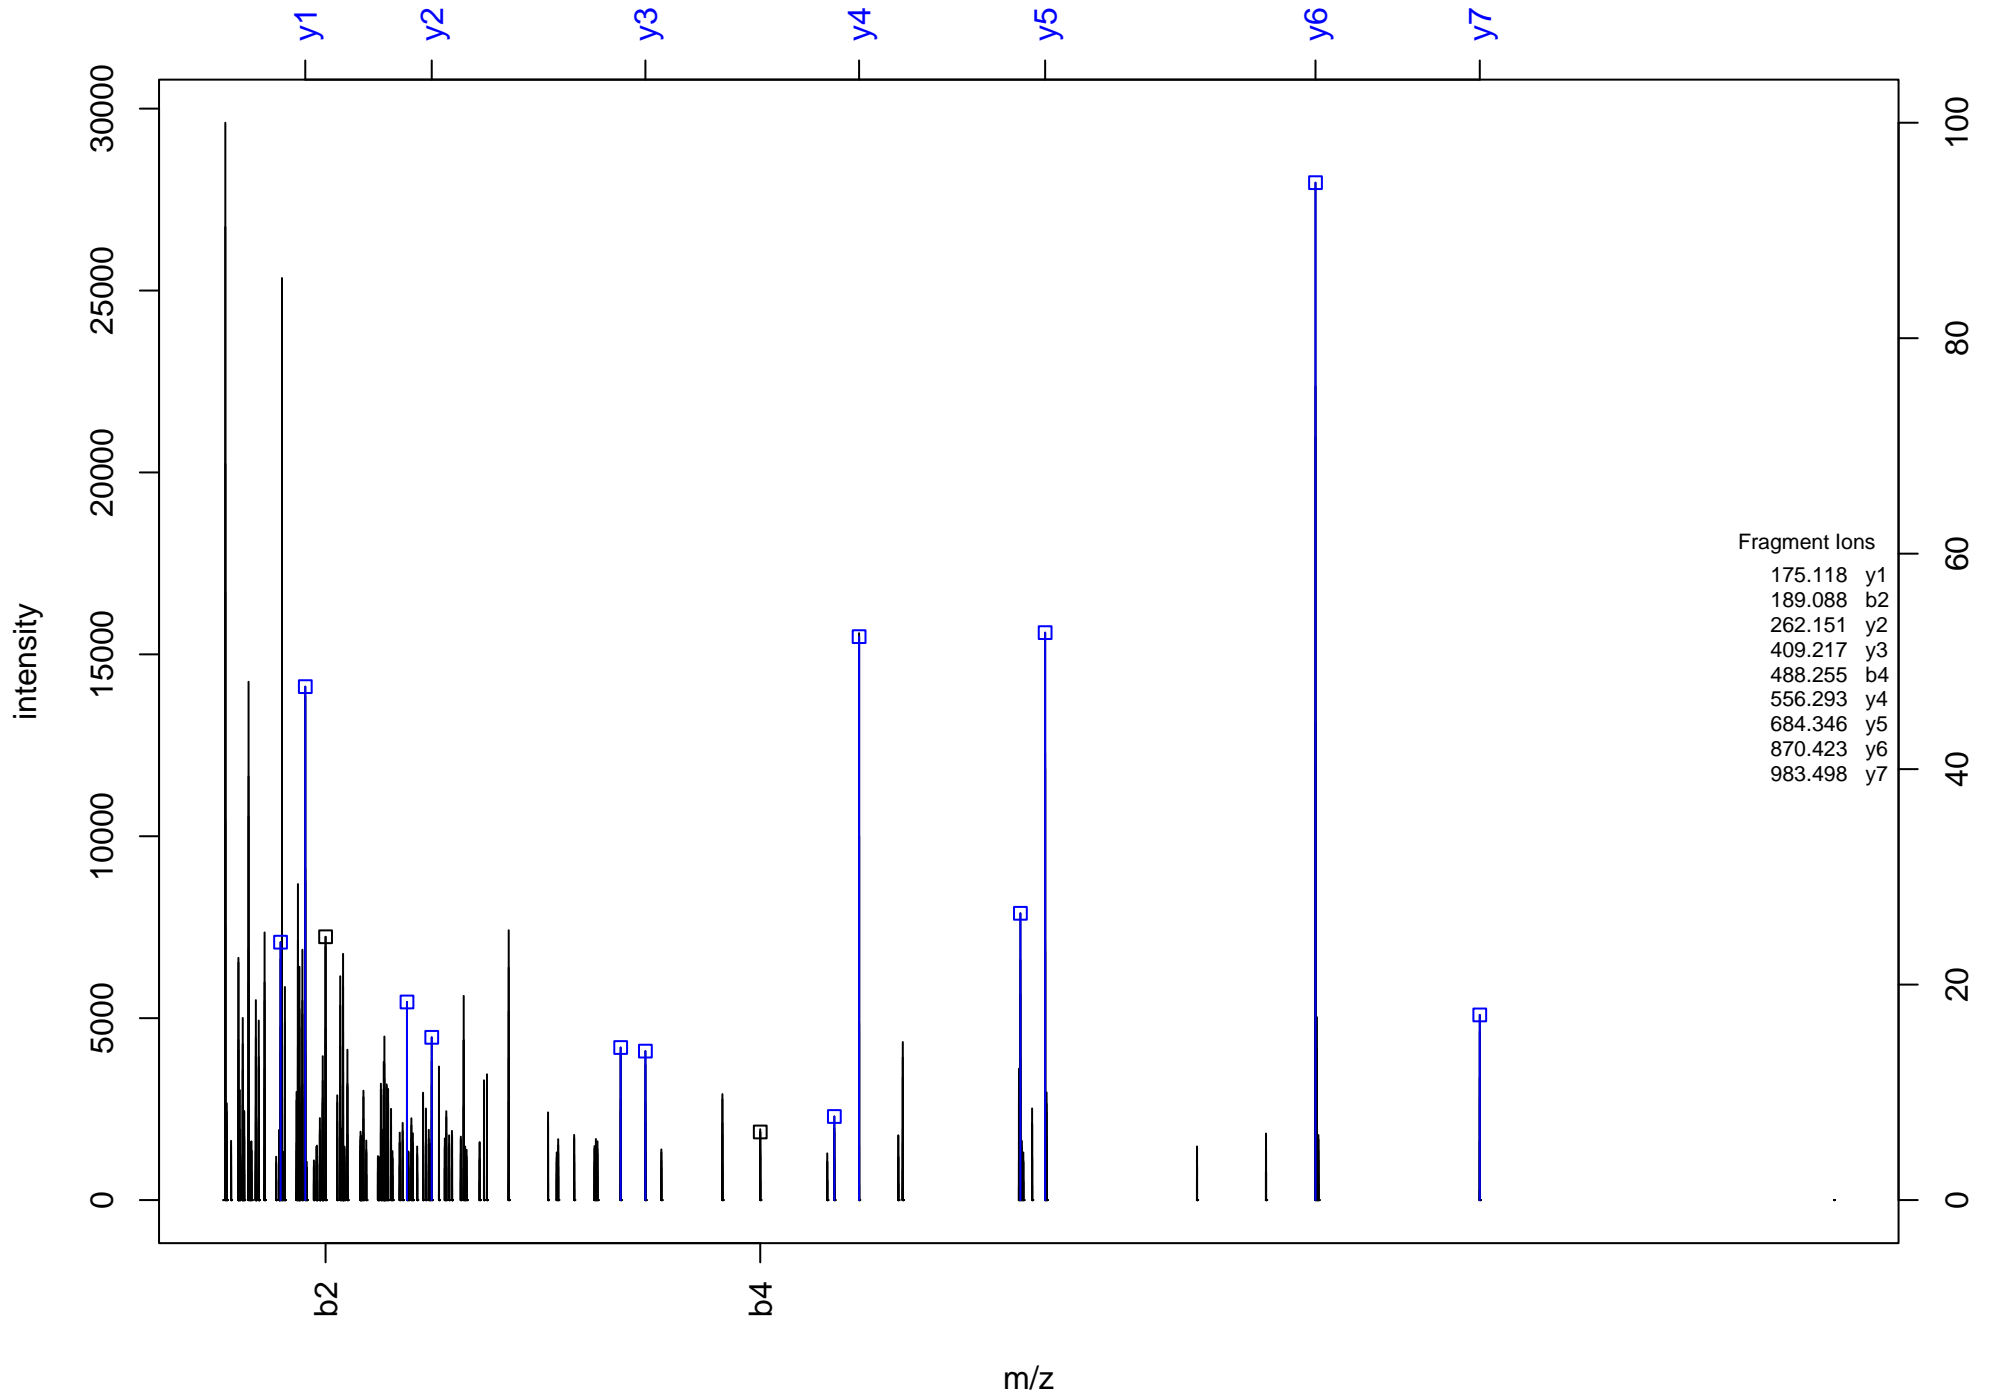

# LTPAQLQFMR

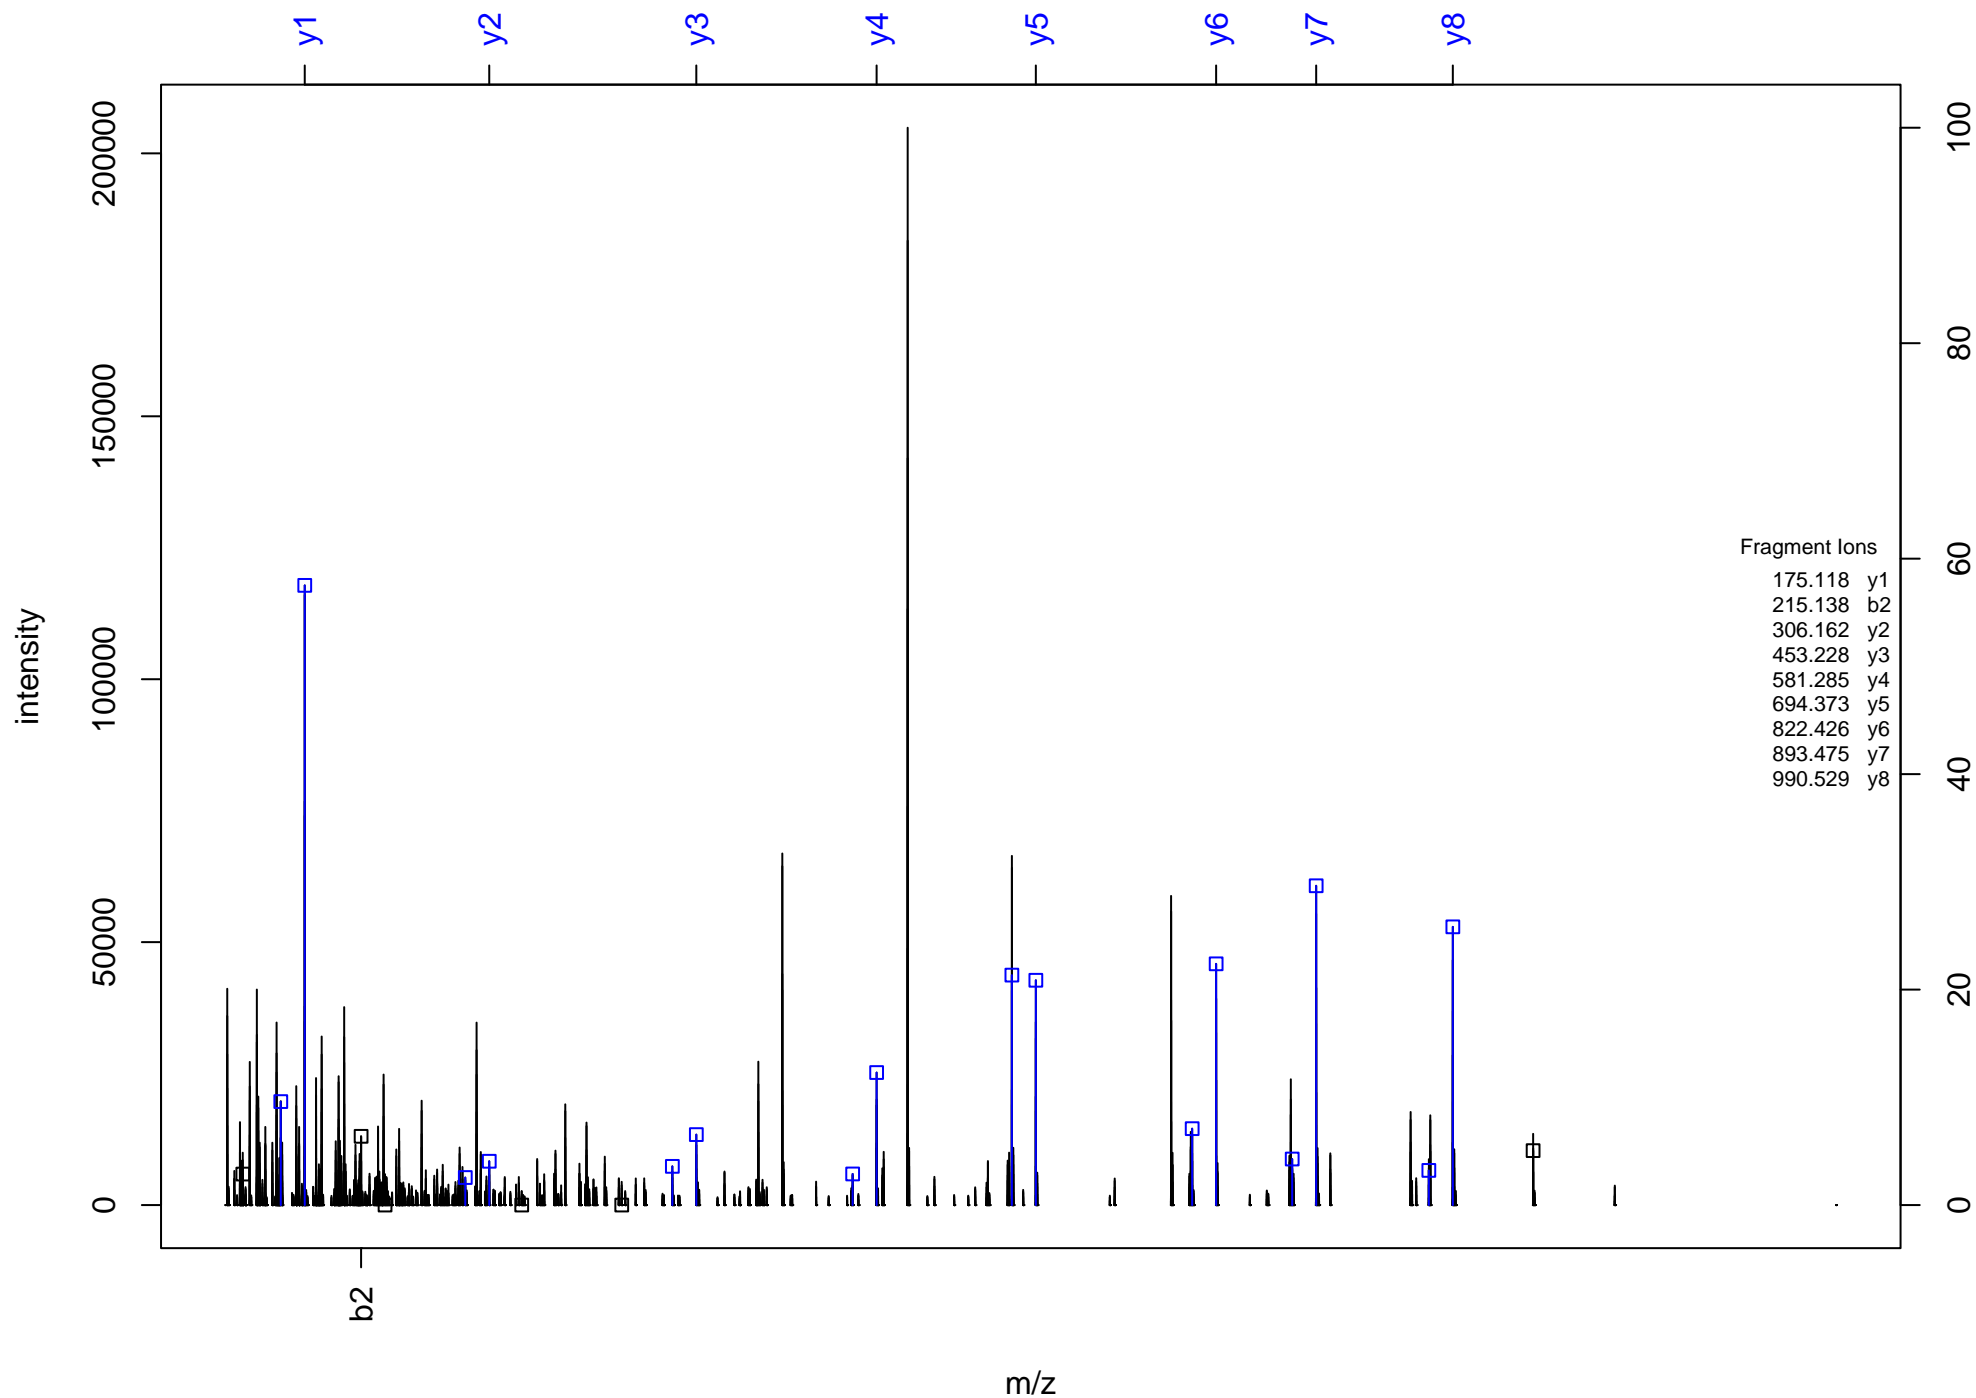

# VVAEVDIPTALVQNK

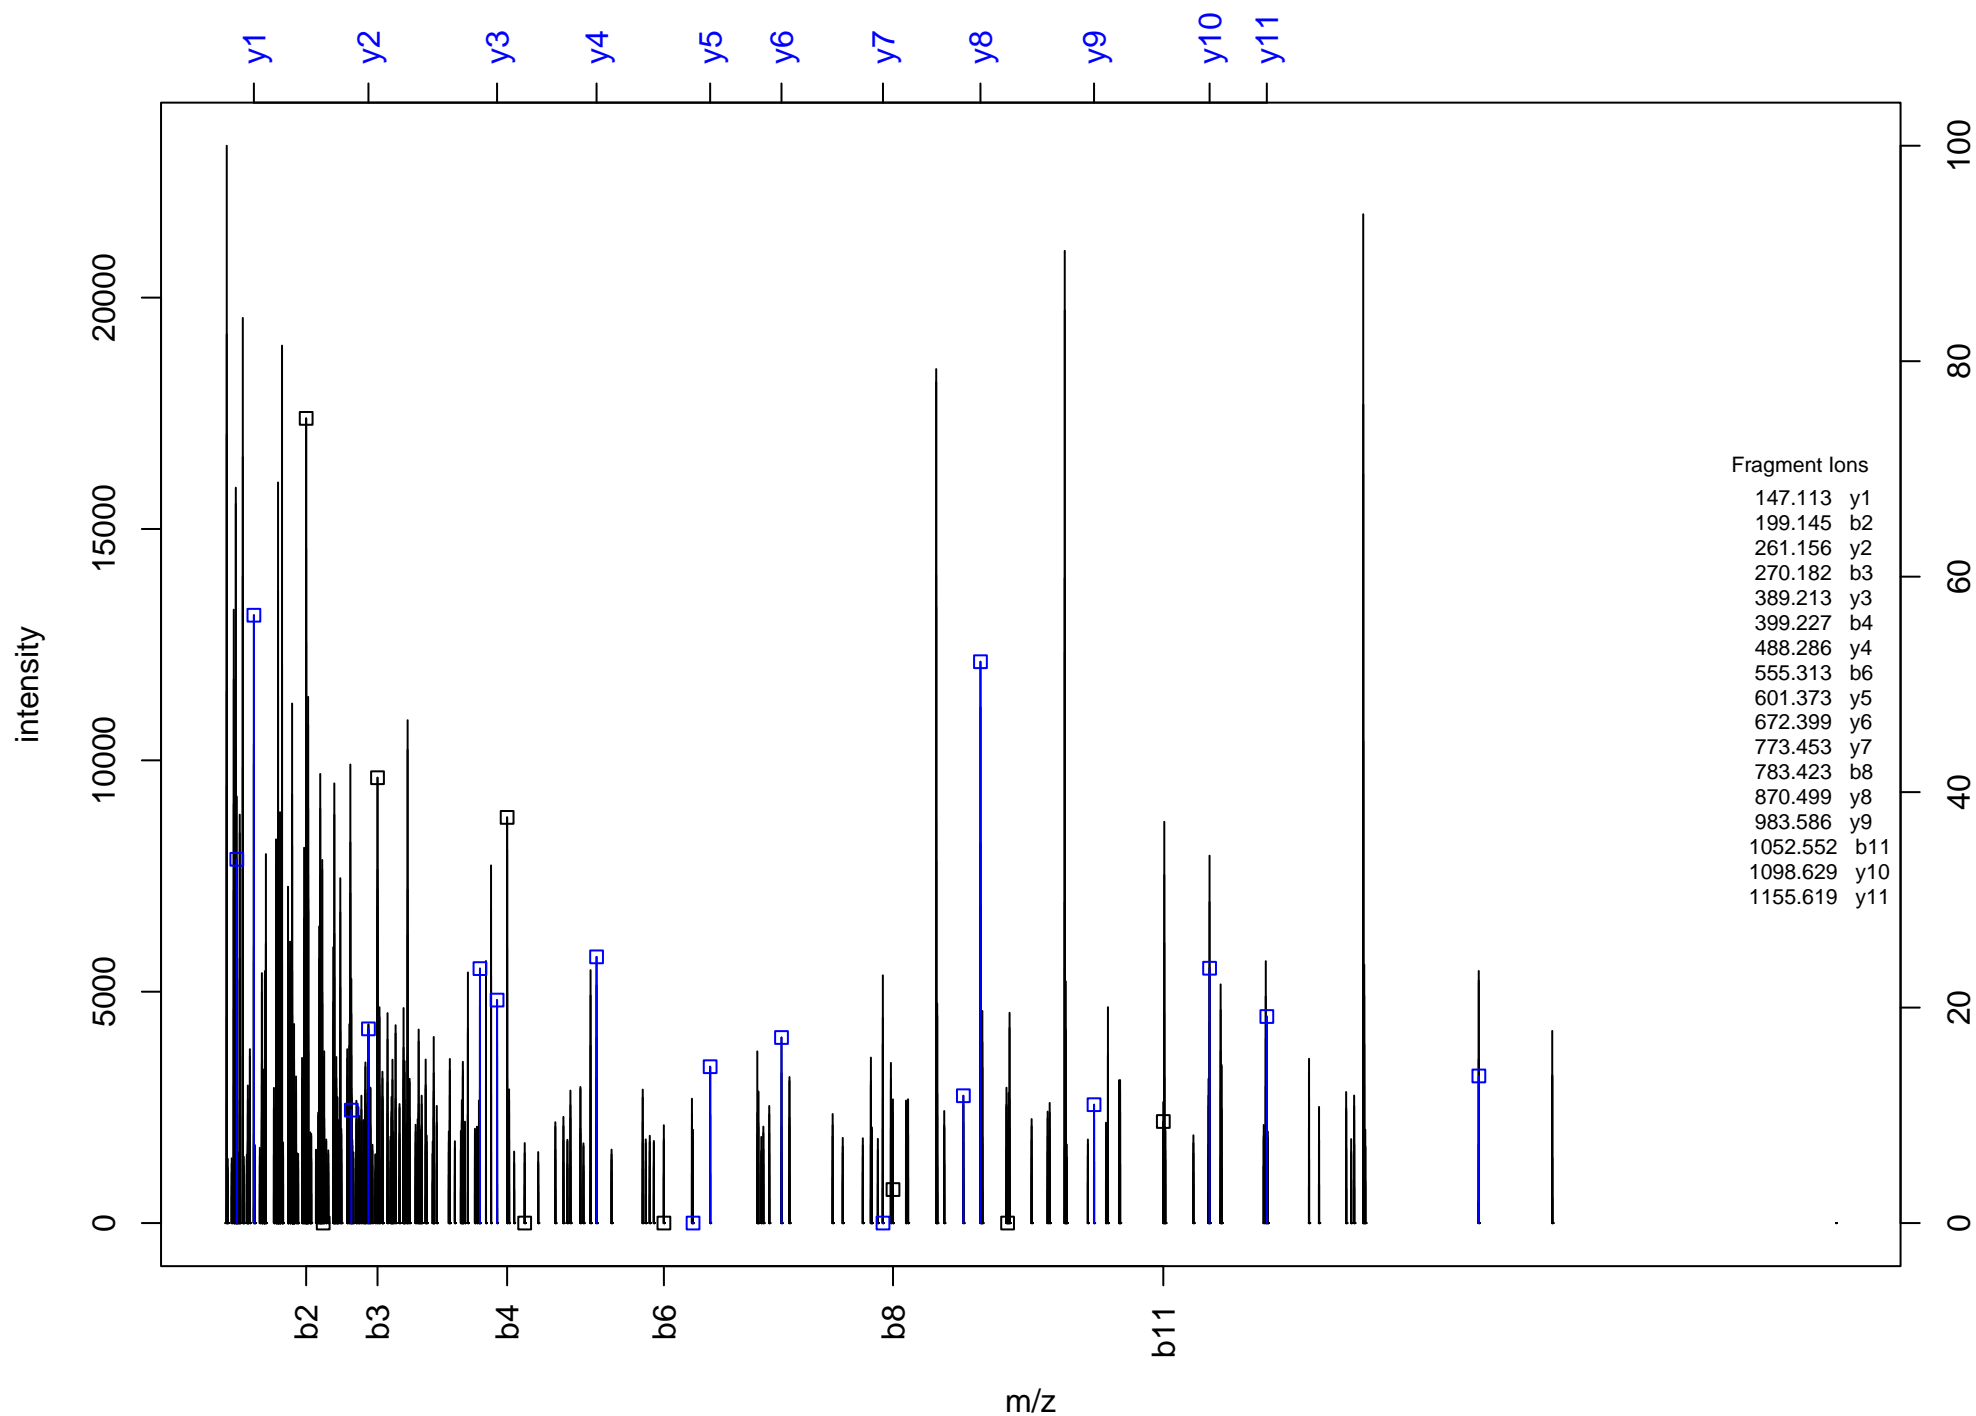

# VVNVLAVCNMPFEIR

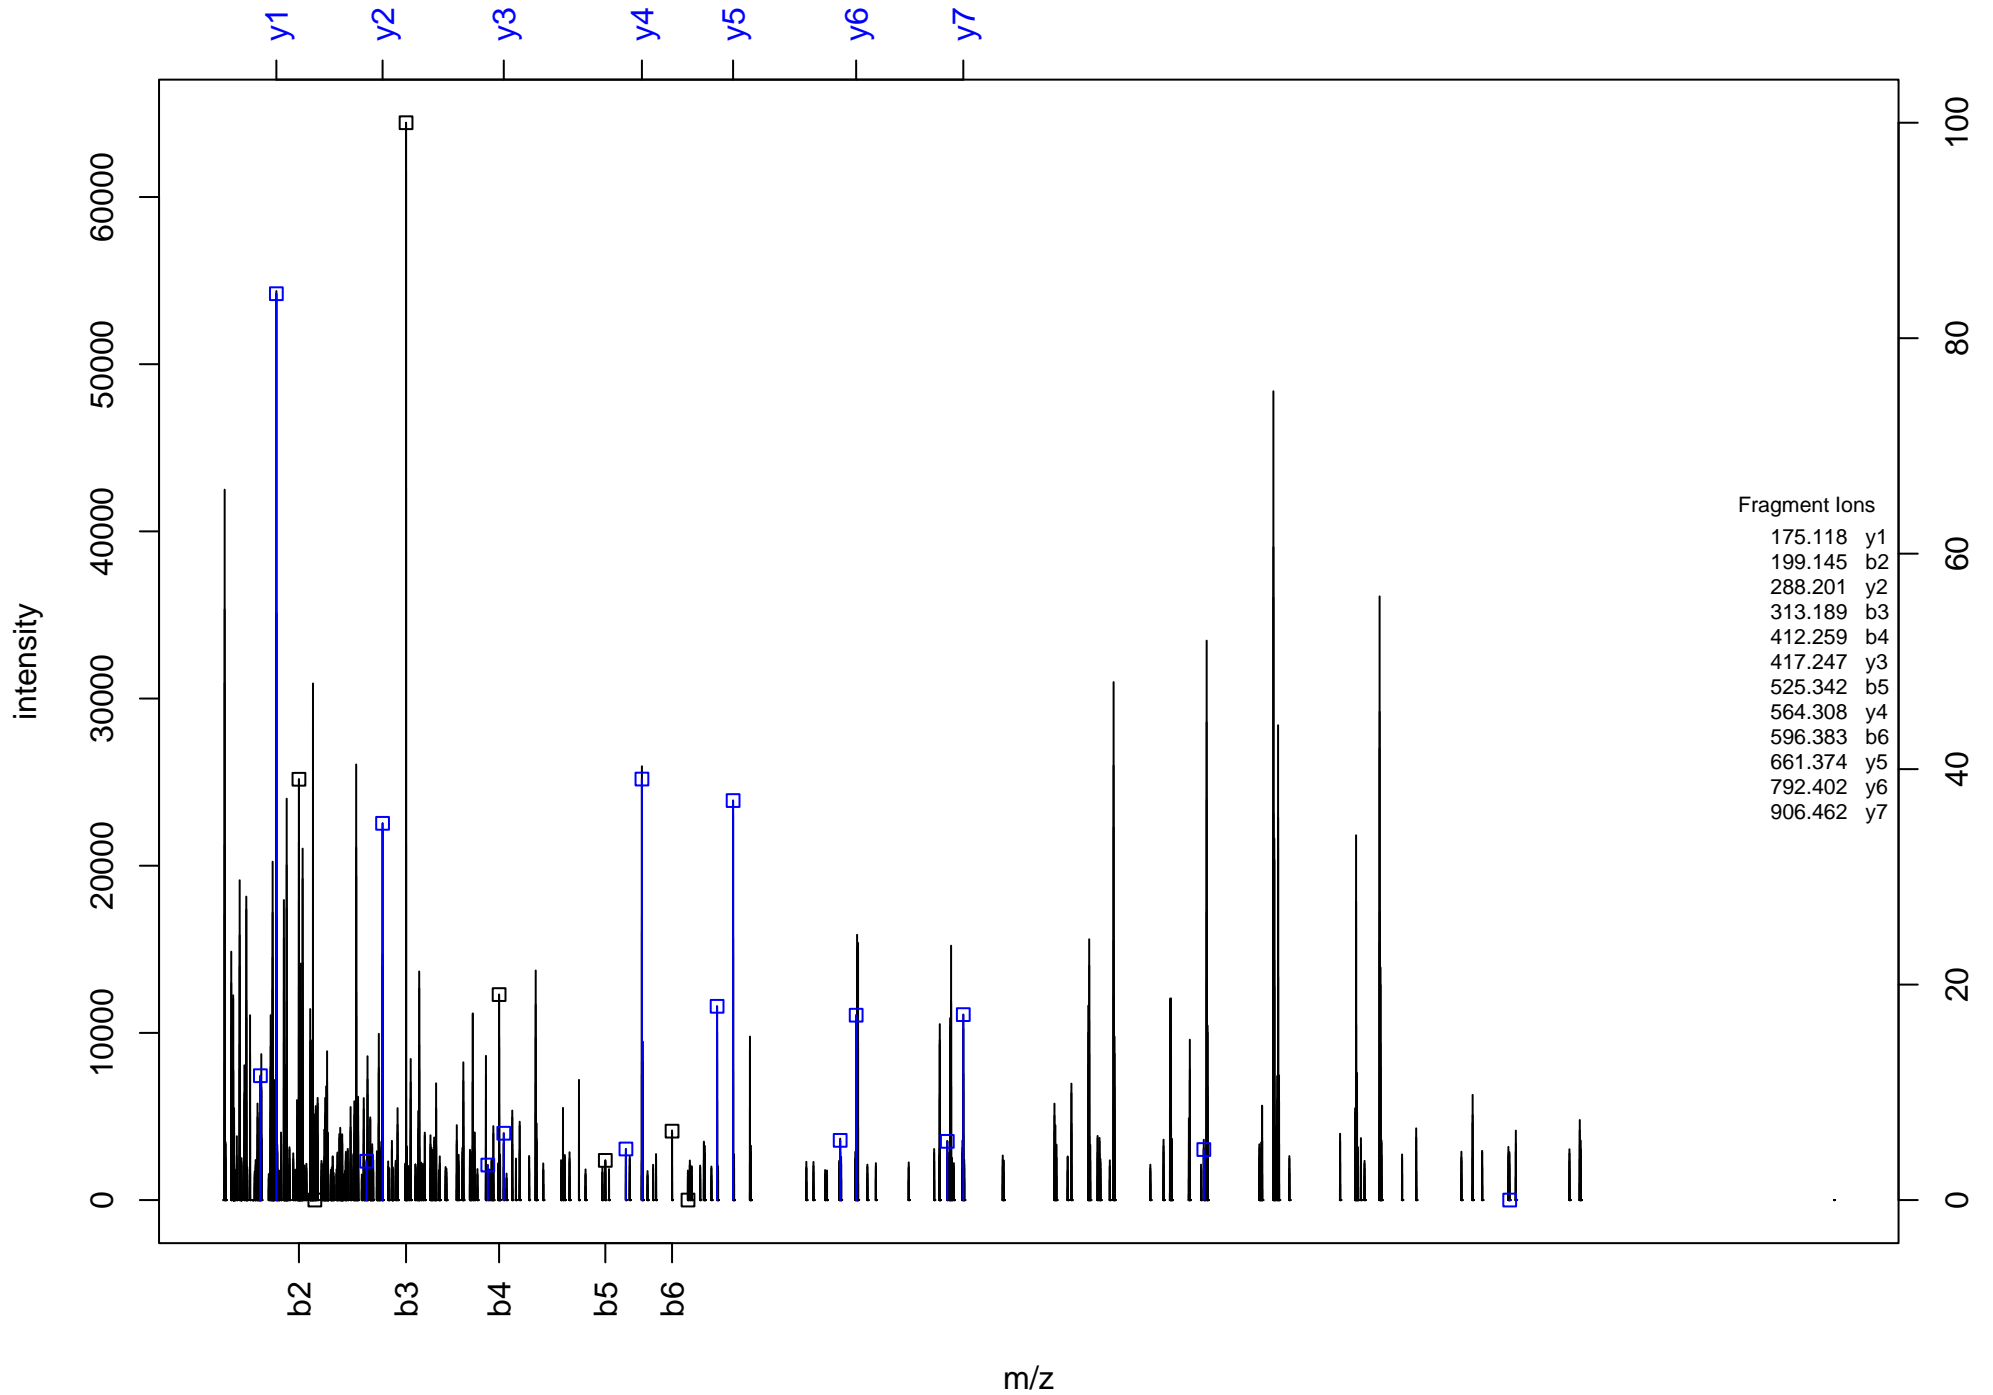

# SQSEEQSEASSEHLEQFTQSAEK

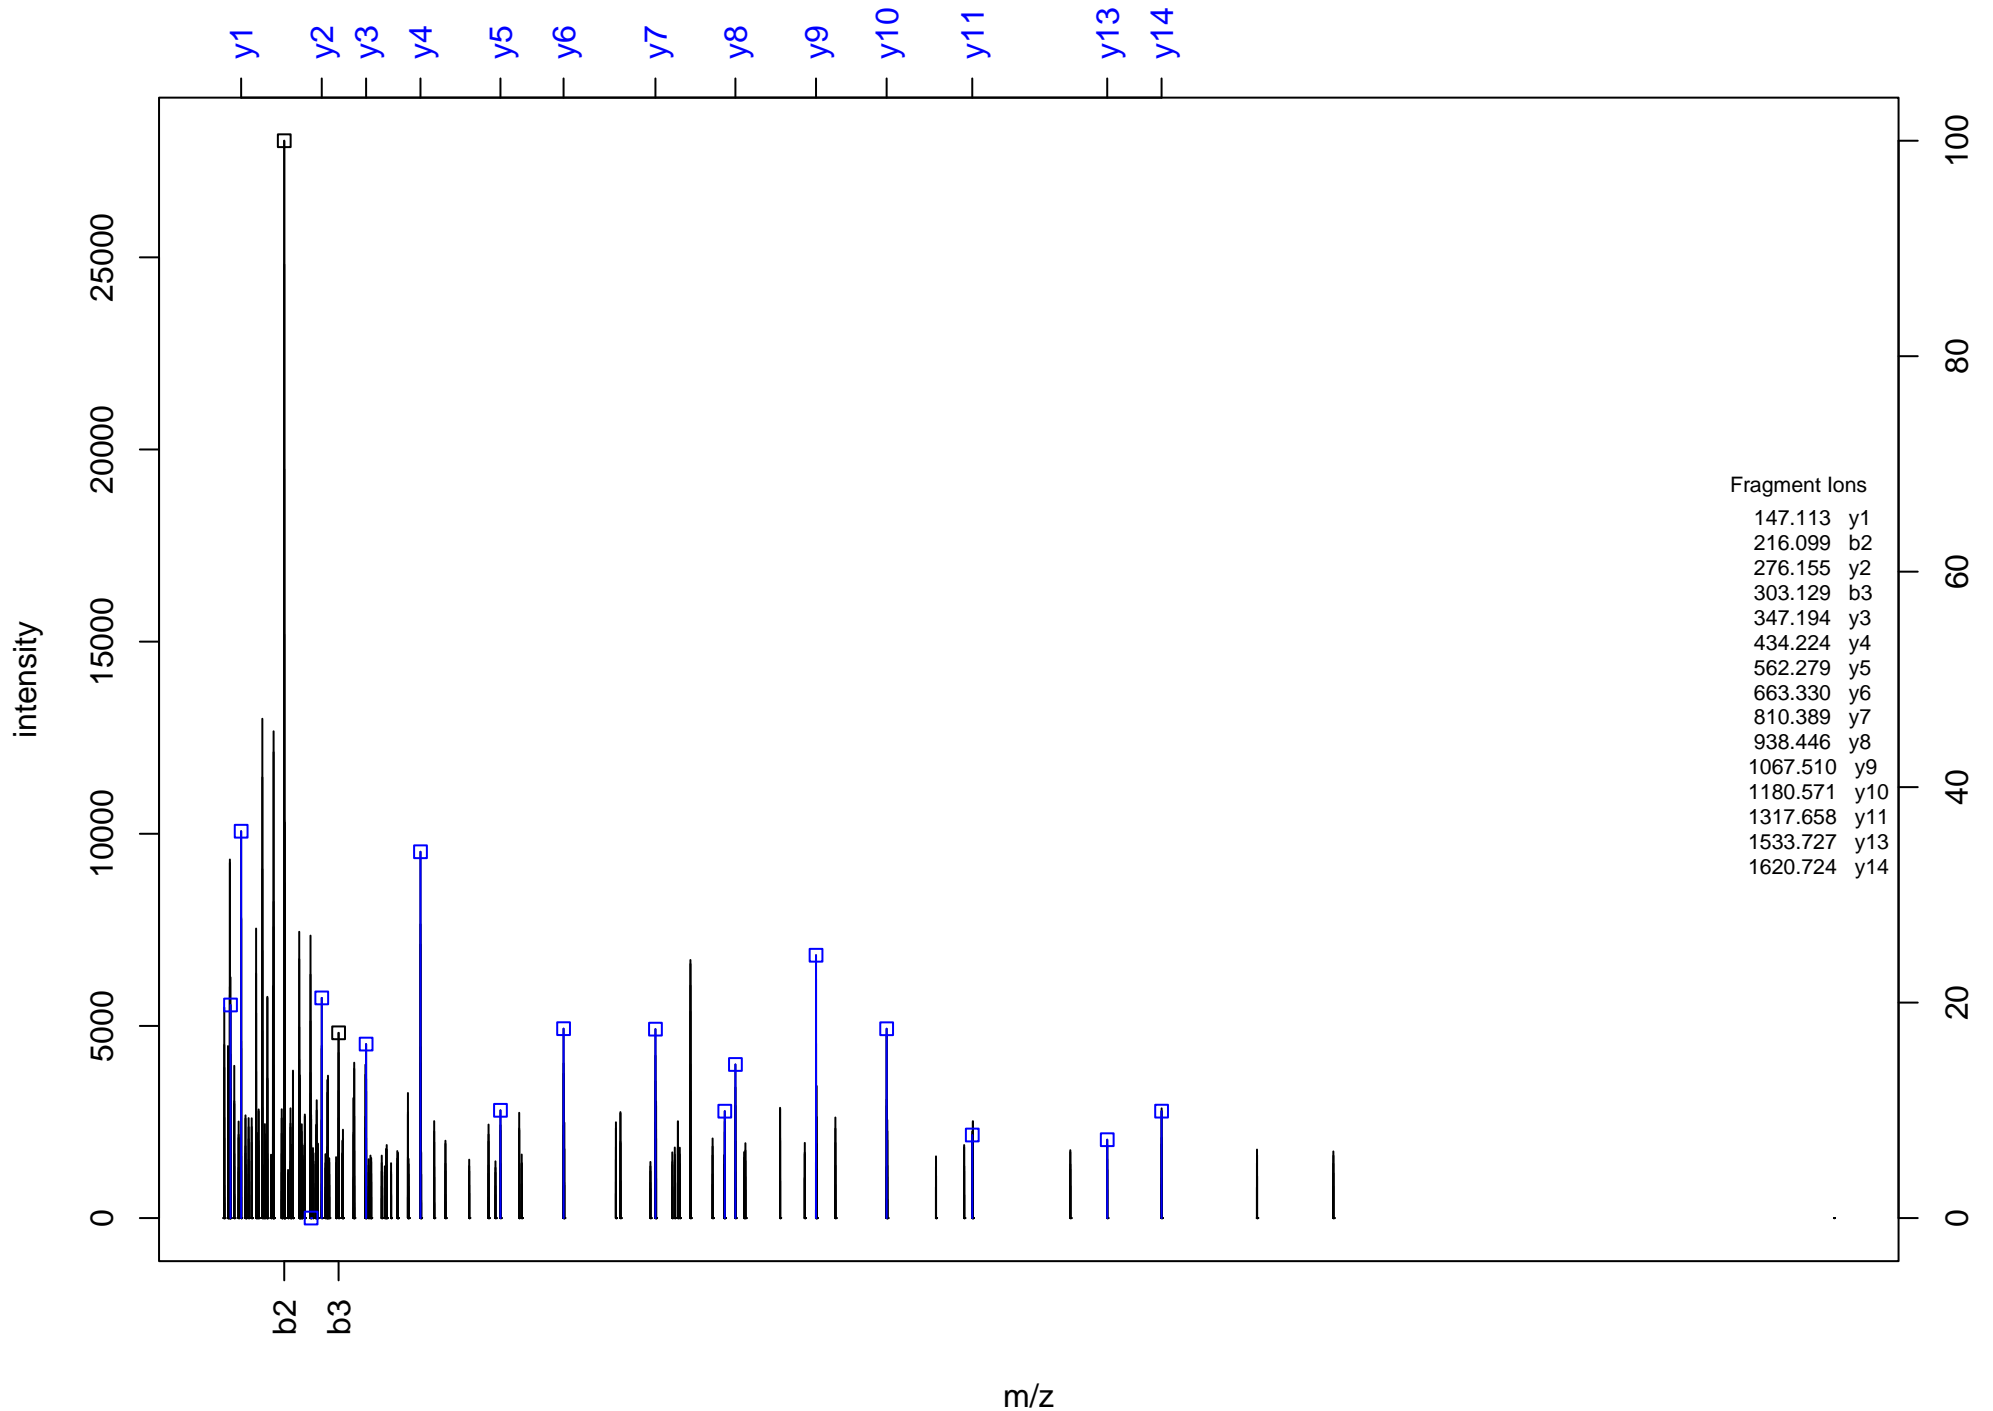



# AFADPEPEPEASPSLWEIEFAK

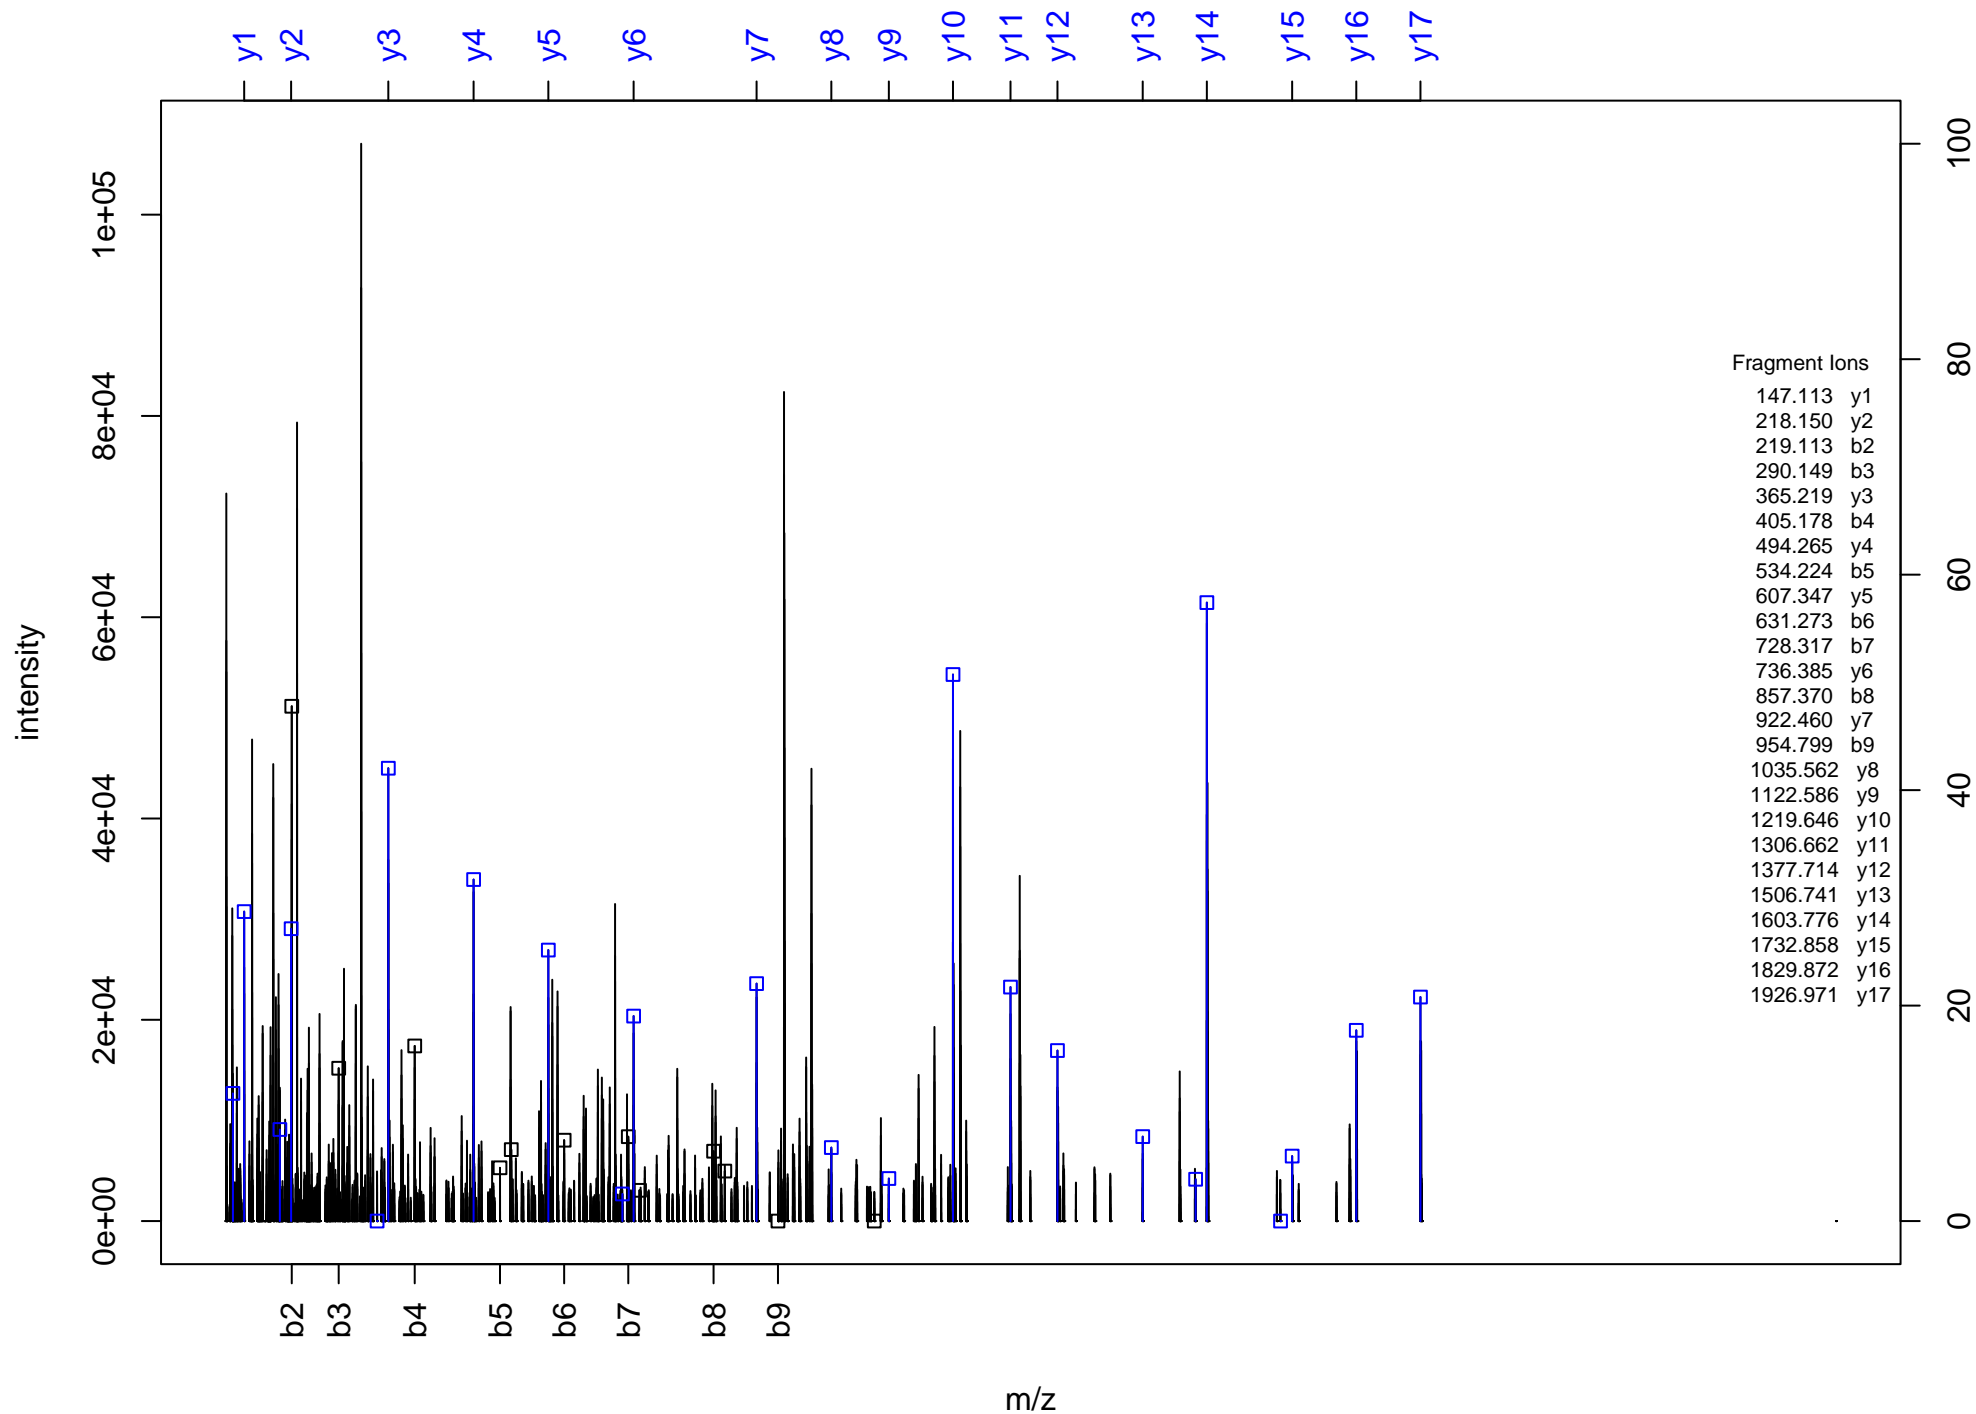

# YLQ^SQ^IDALIKEN^Q^EIR

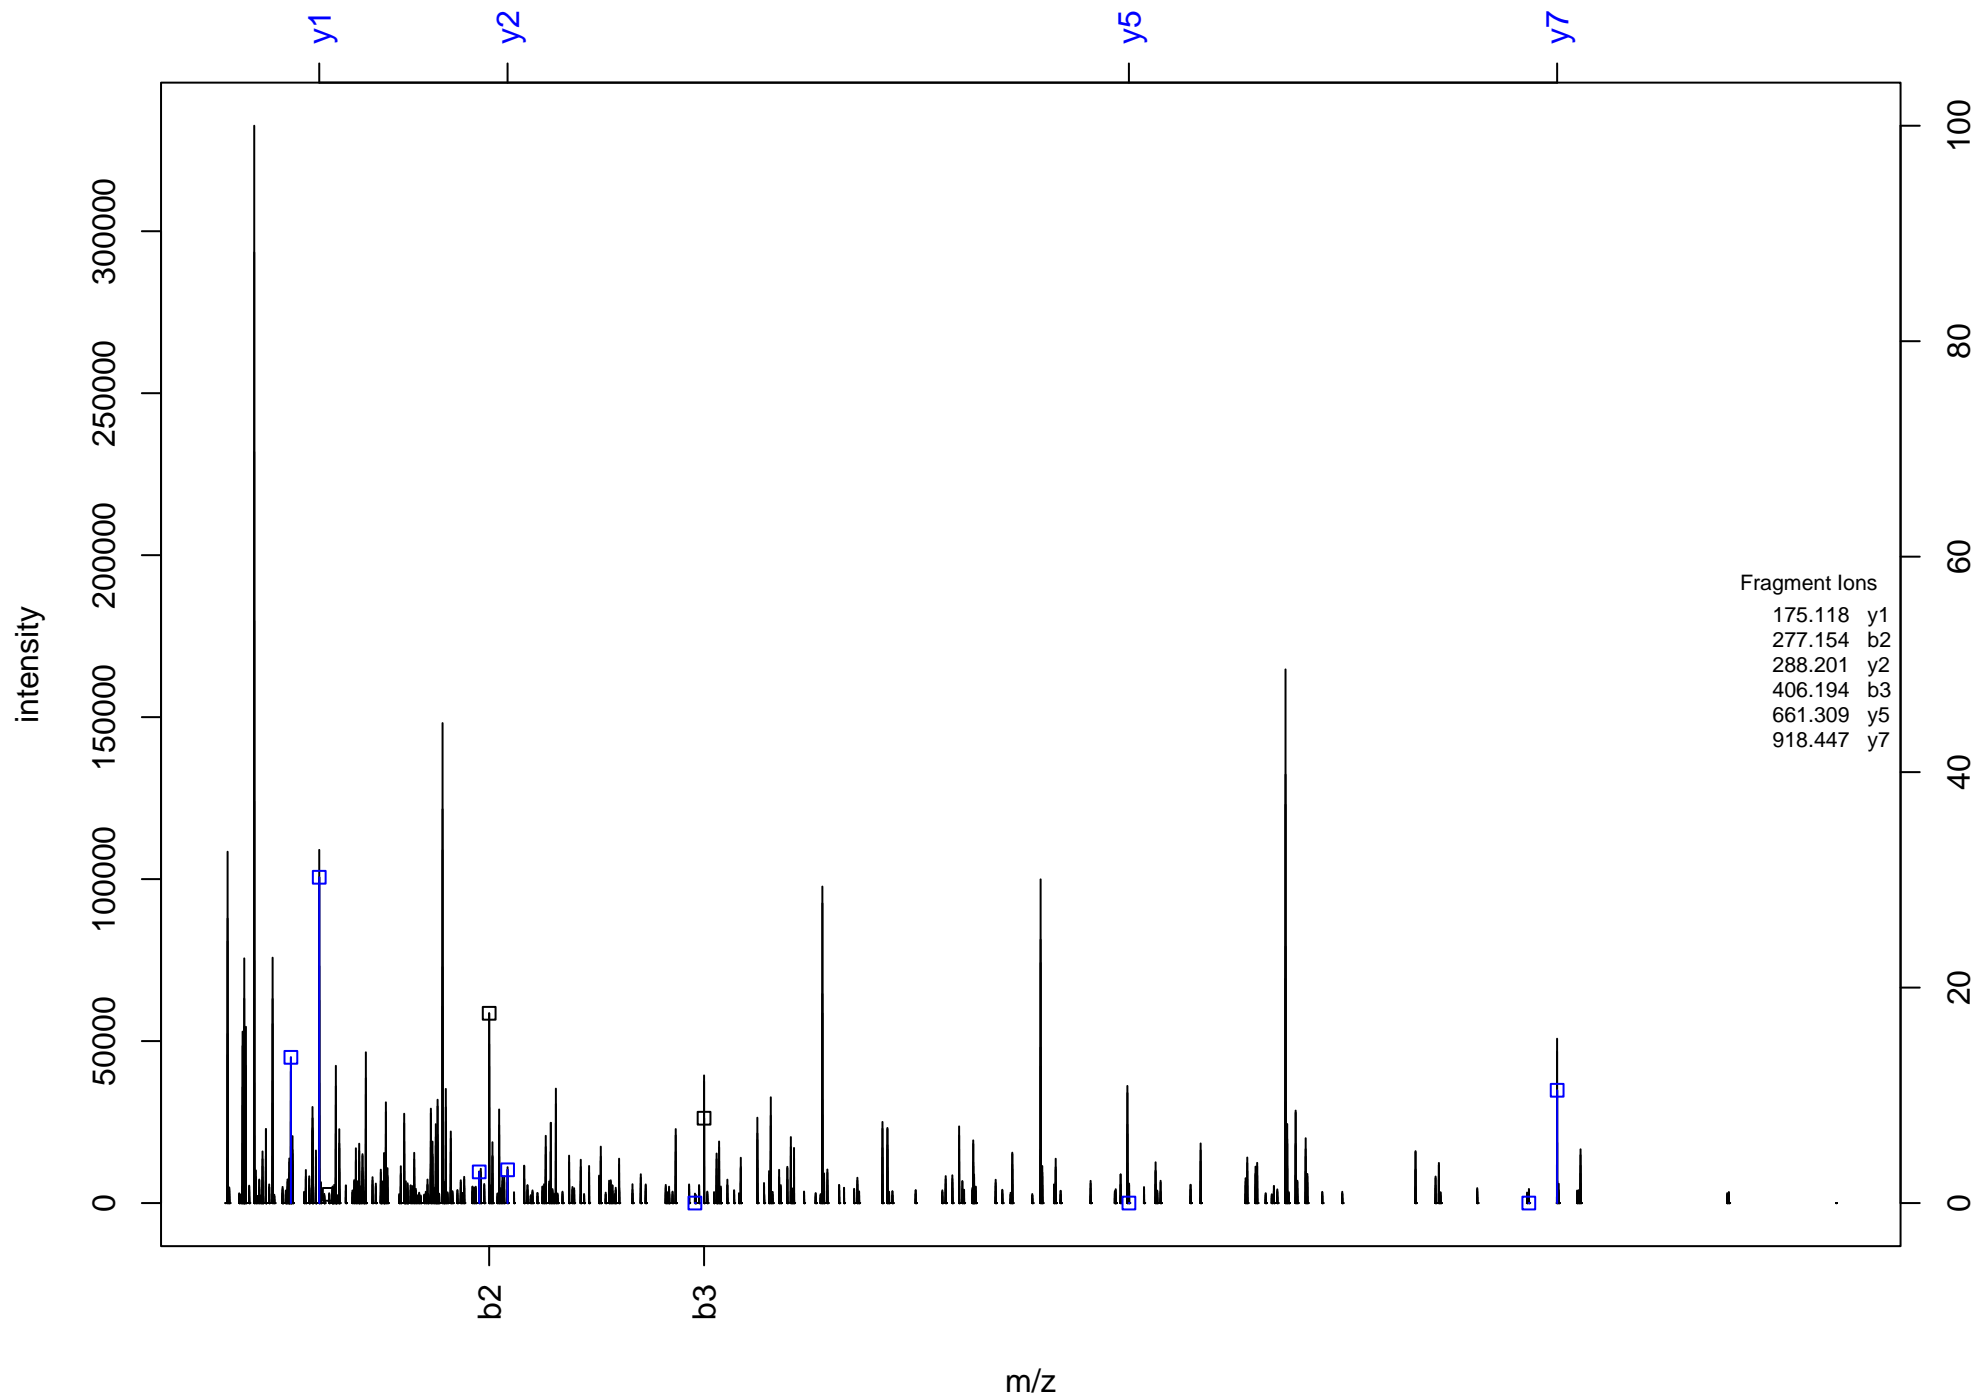

# RTLIVMVTEN<sup>N</sup><sup>N</sup><sup>K</sup>

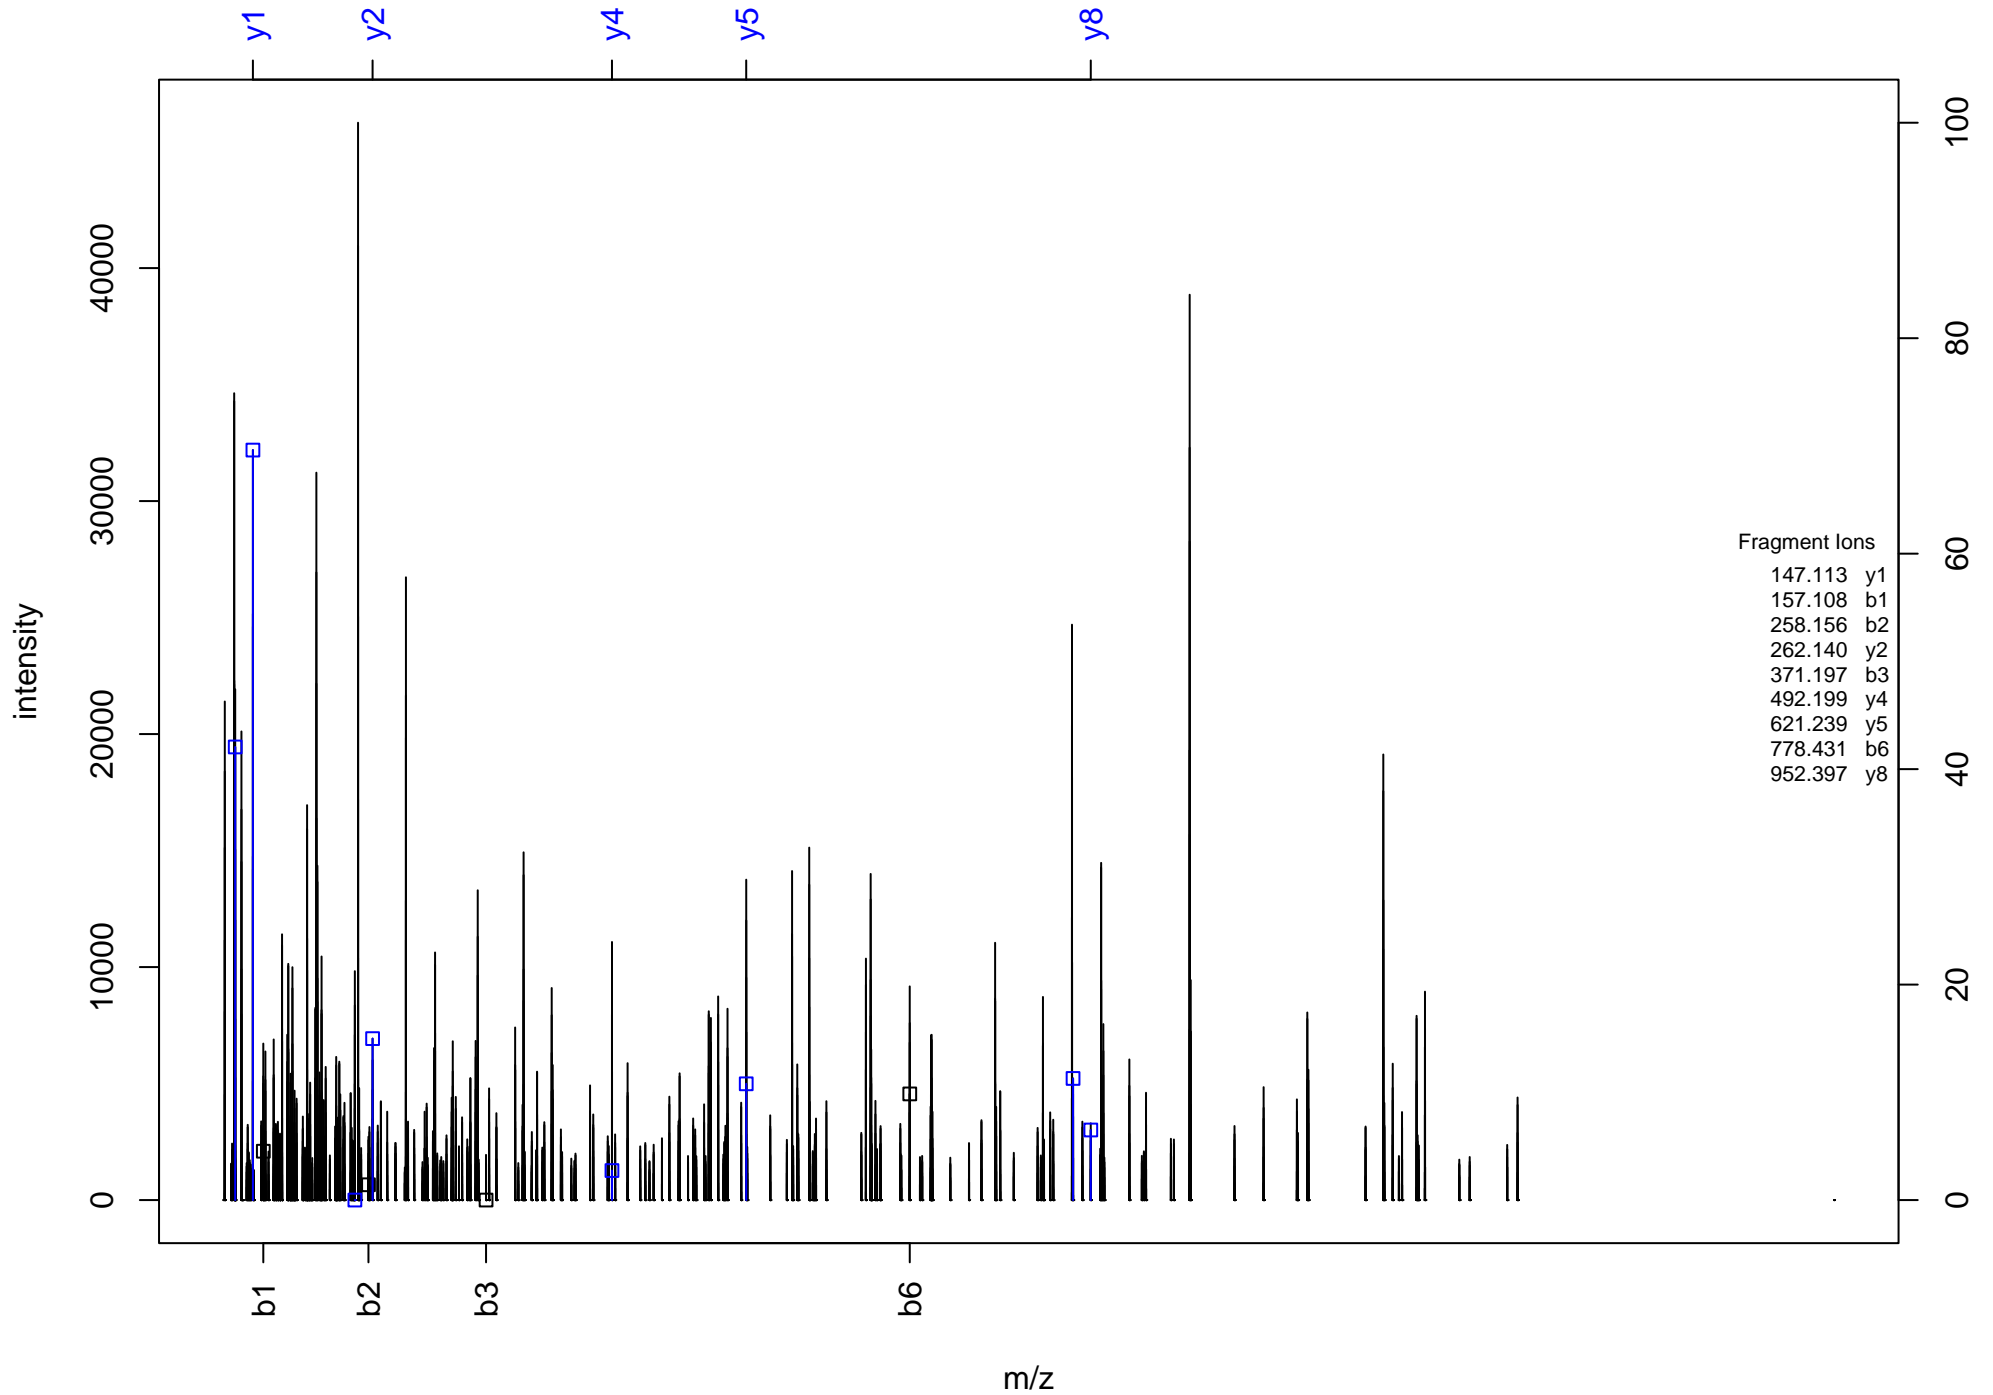

# ISDGQEEADDEEEEEEEEEITK

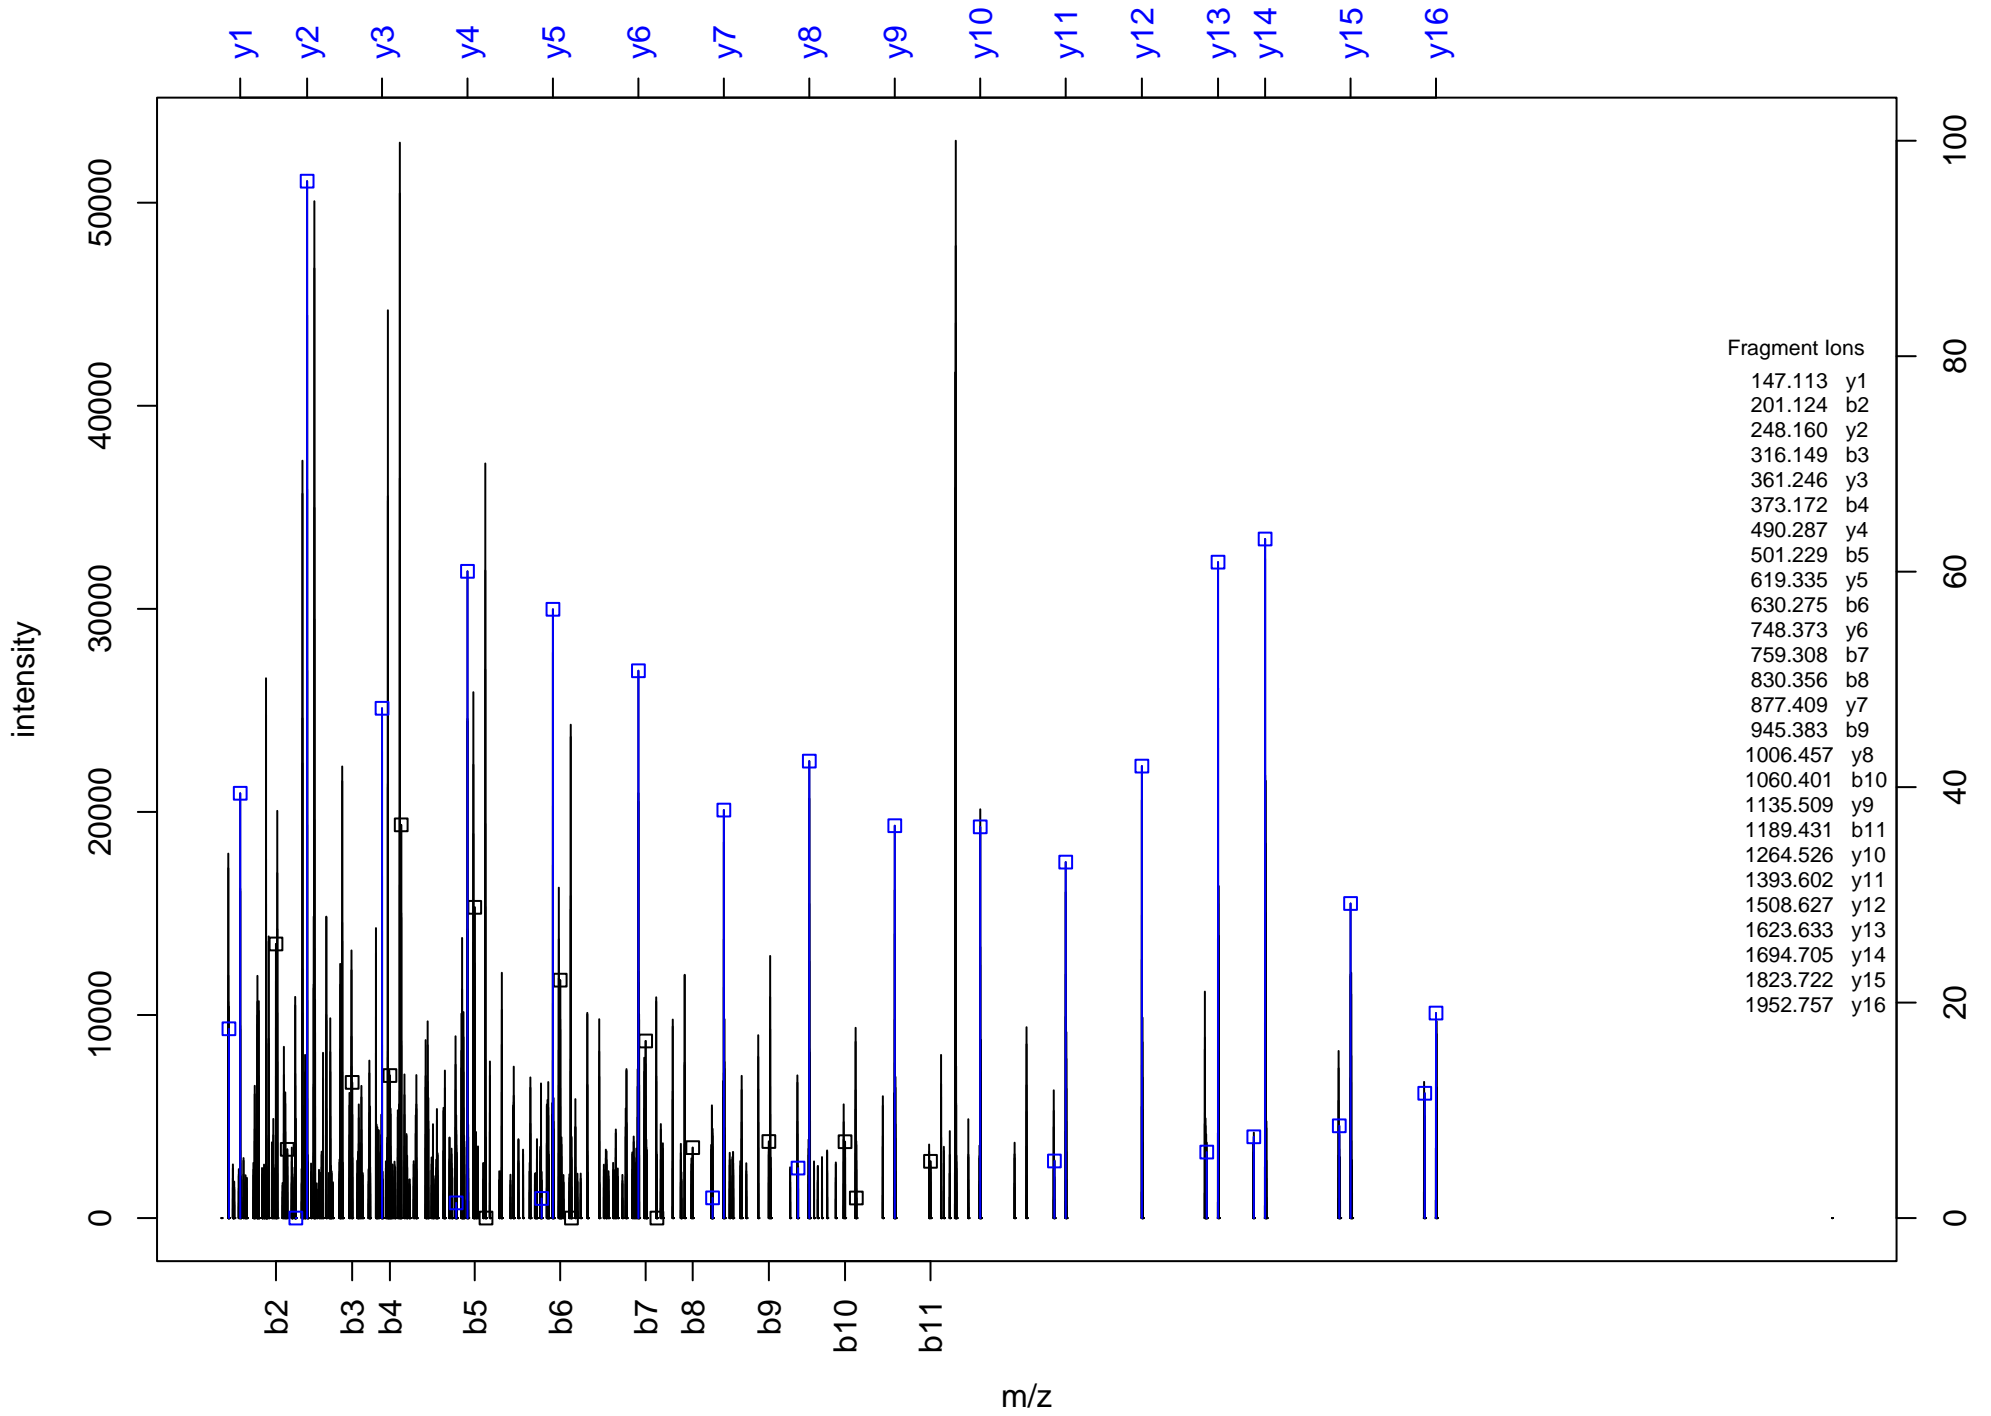

# DLPEPEFPFQYDPSYR

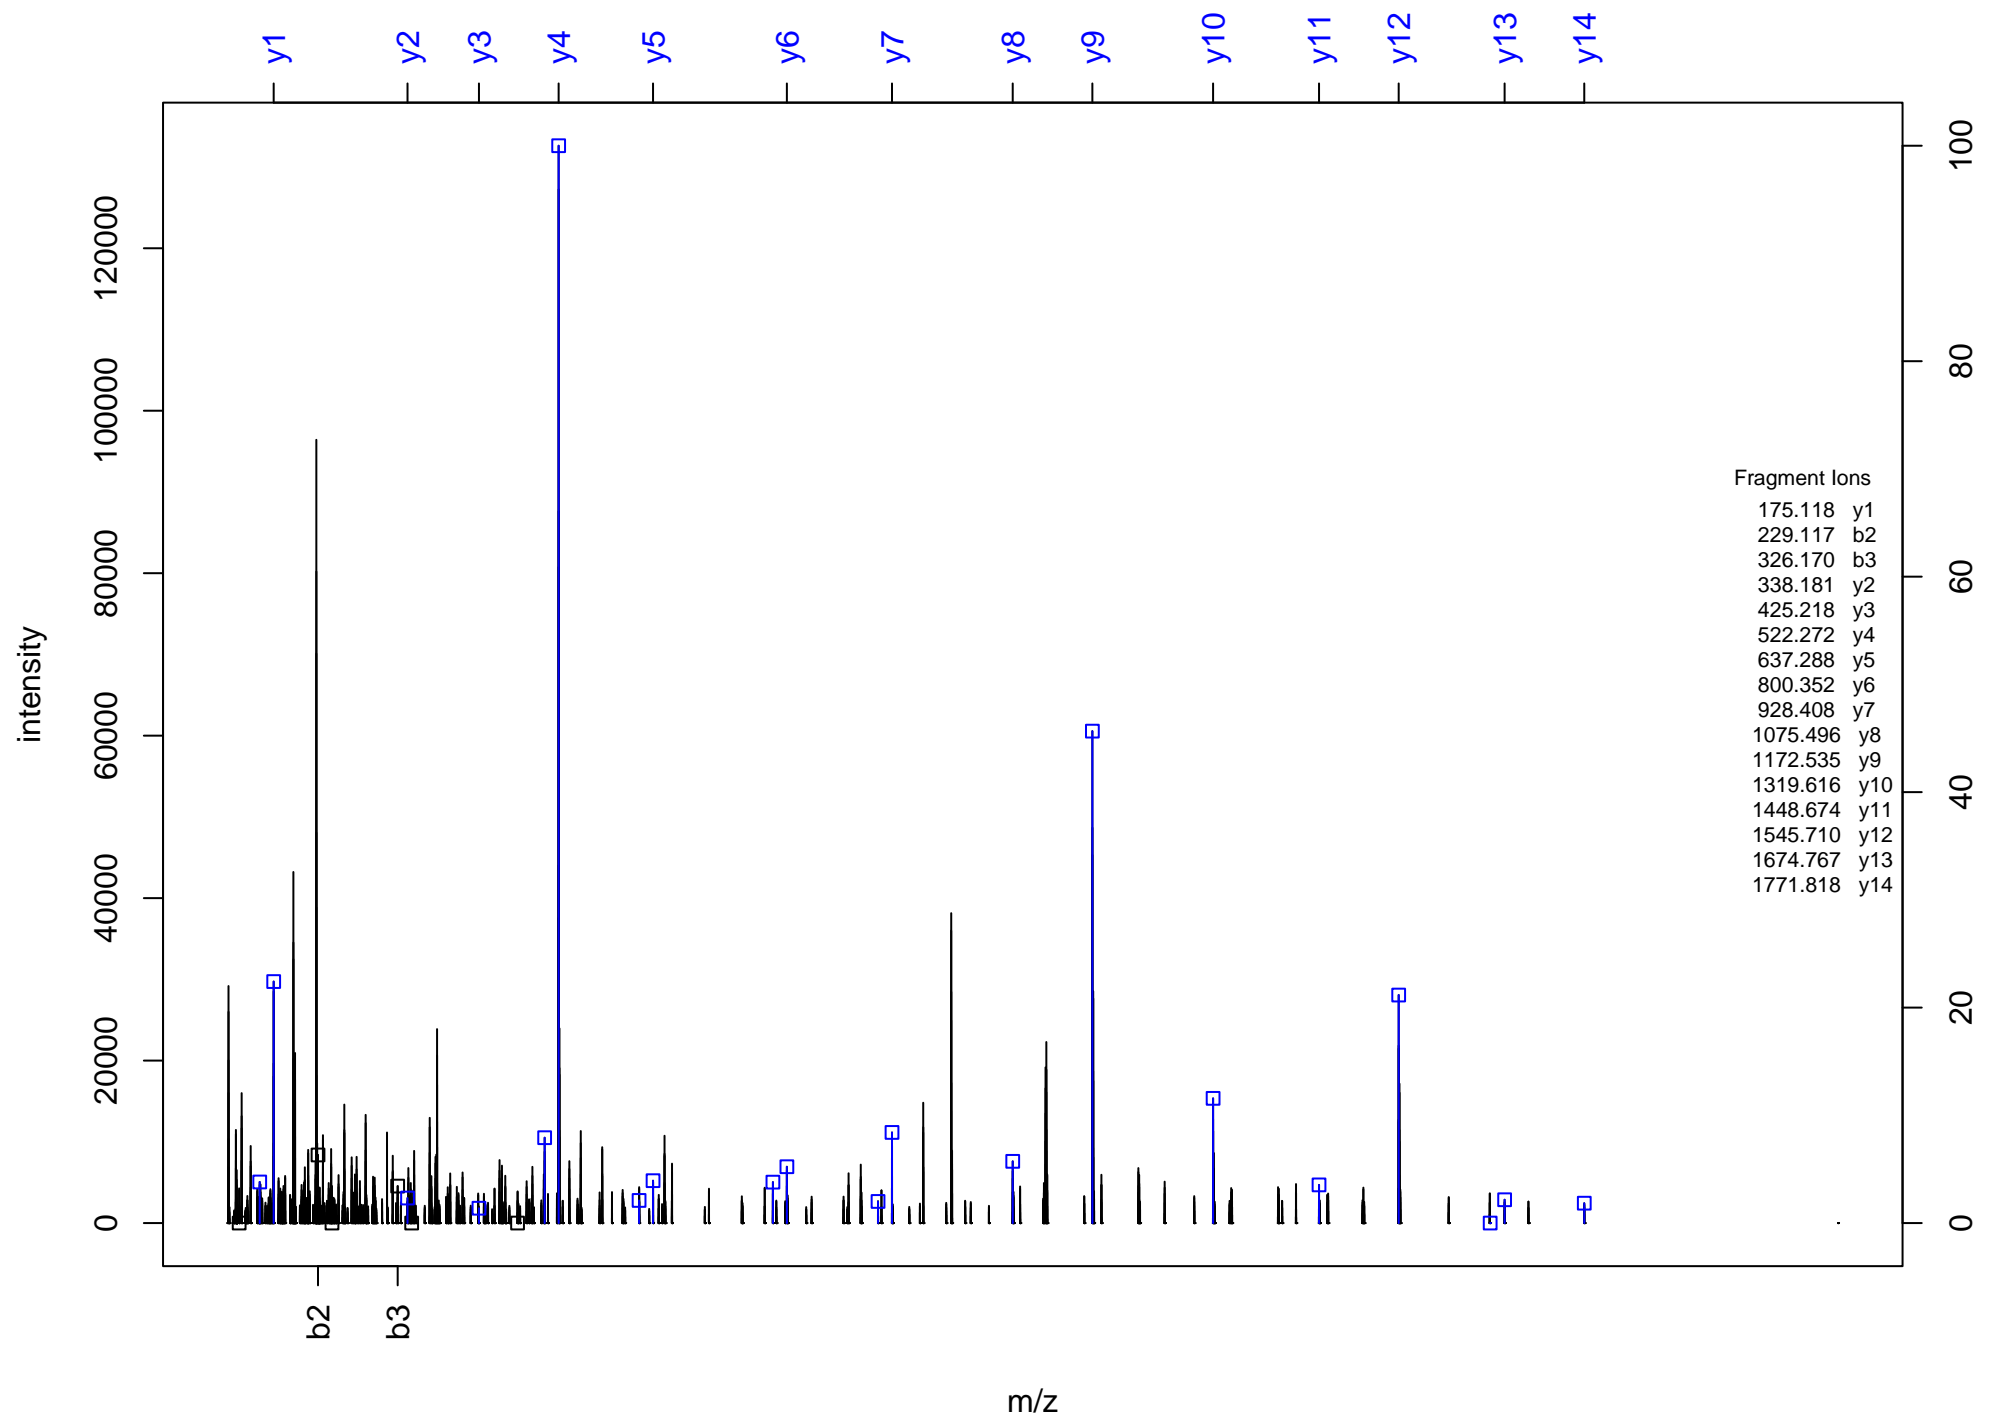

# AIGTAYAVLSNPEK

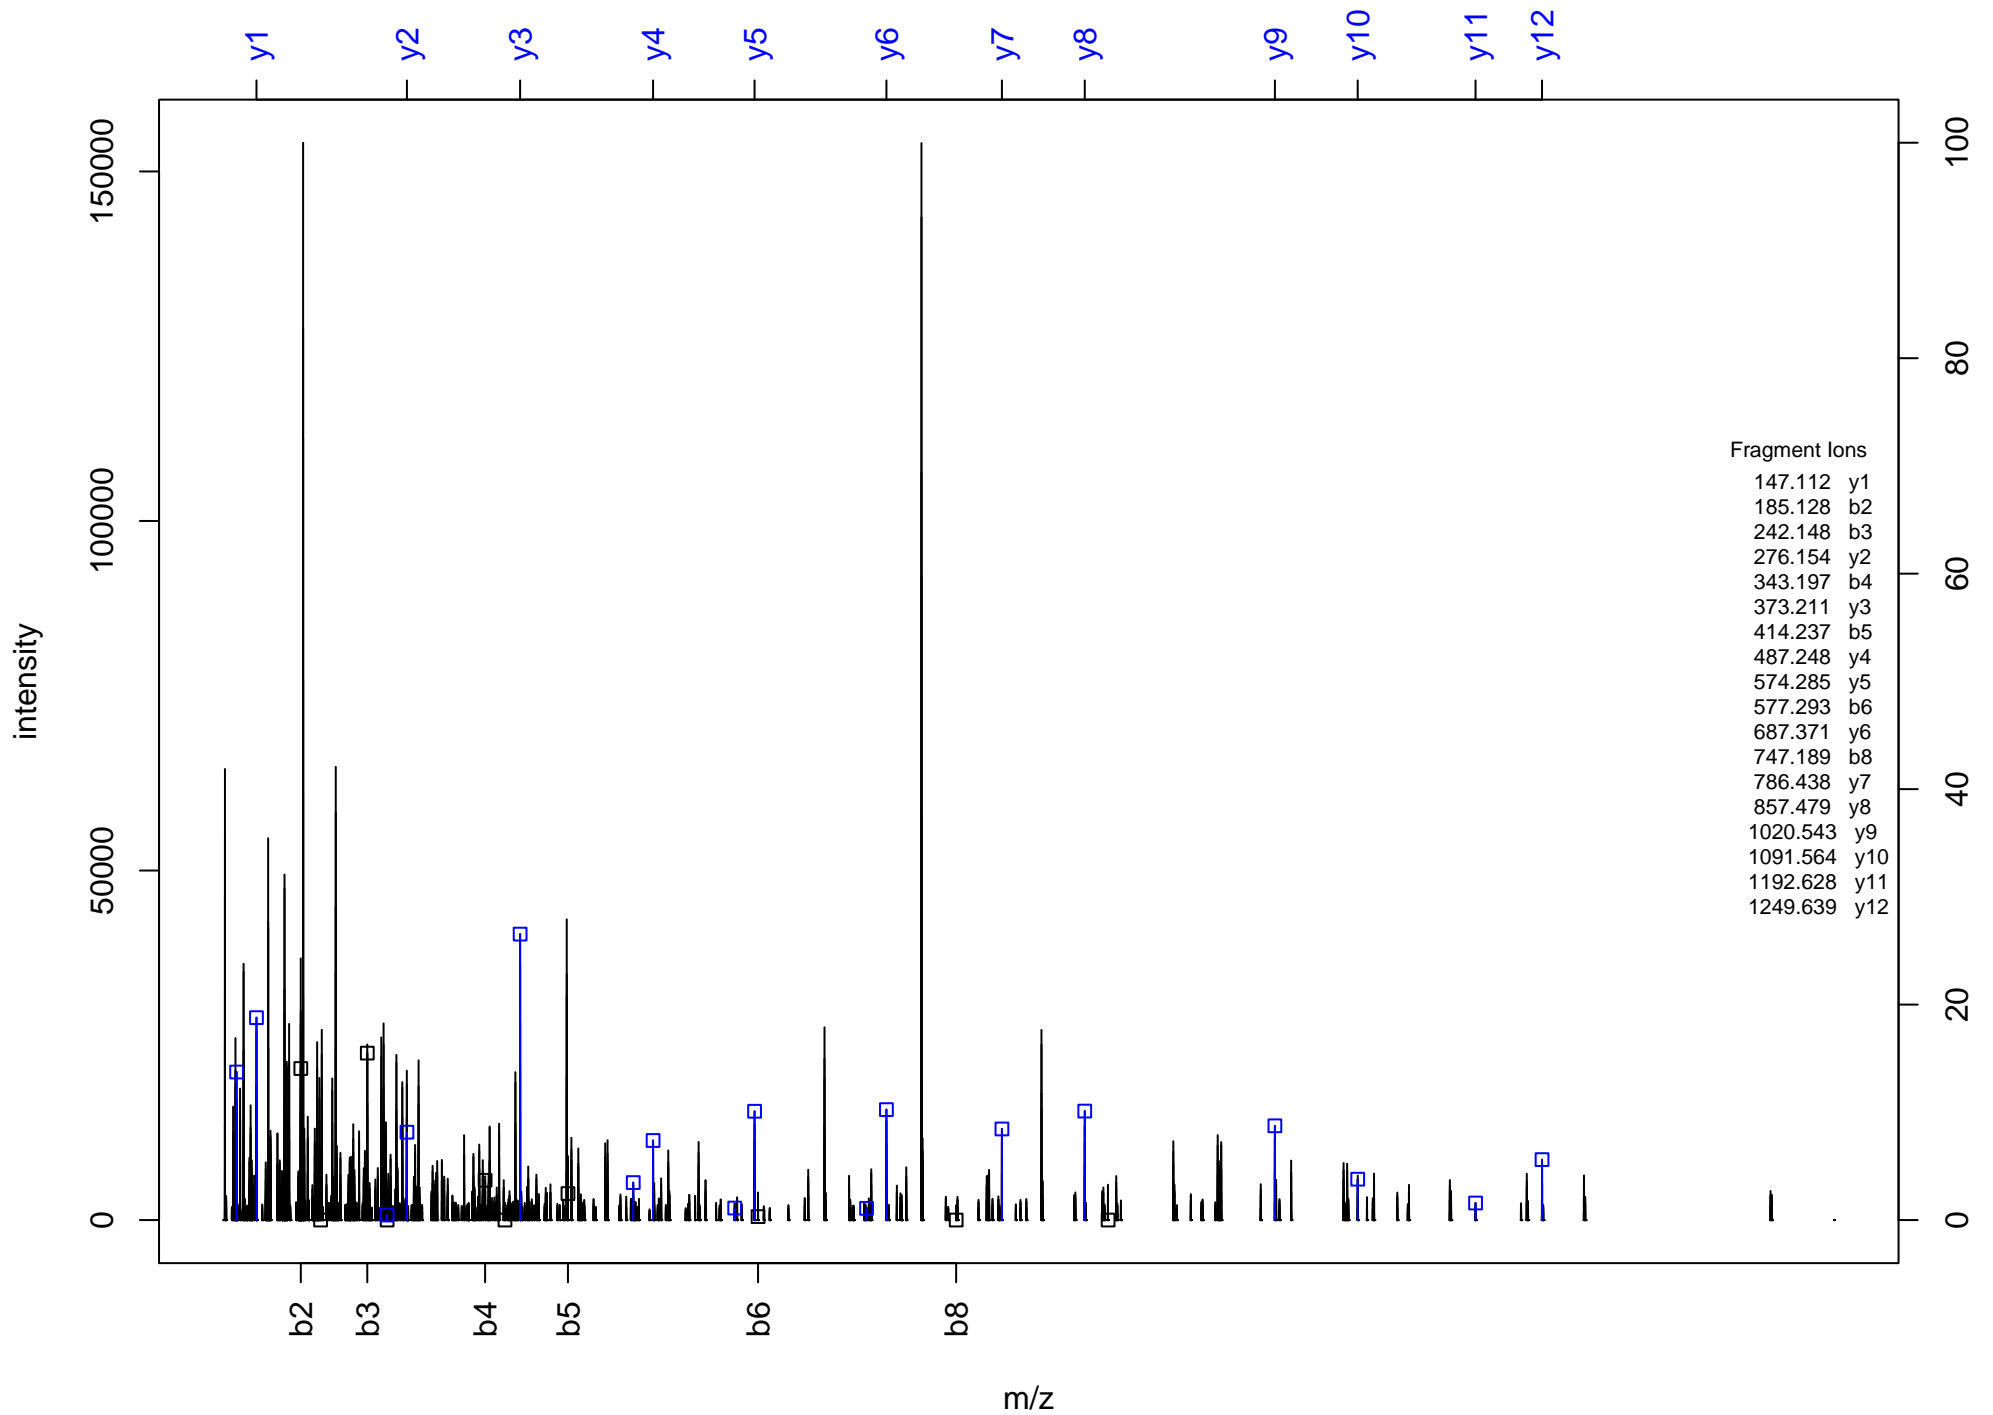

# GEAYNLFEHNCNTFSNEVAQFLTGR

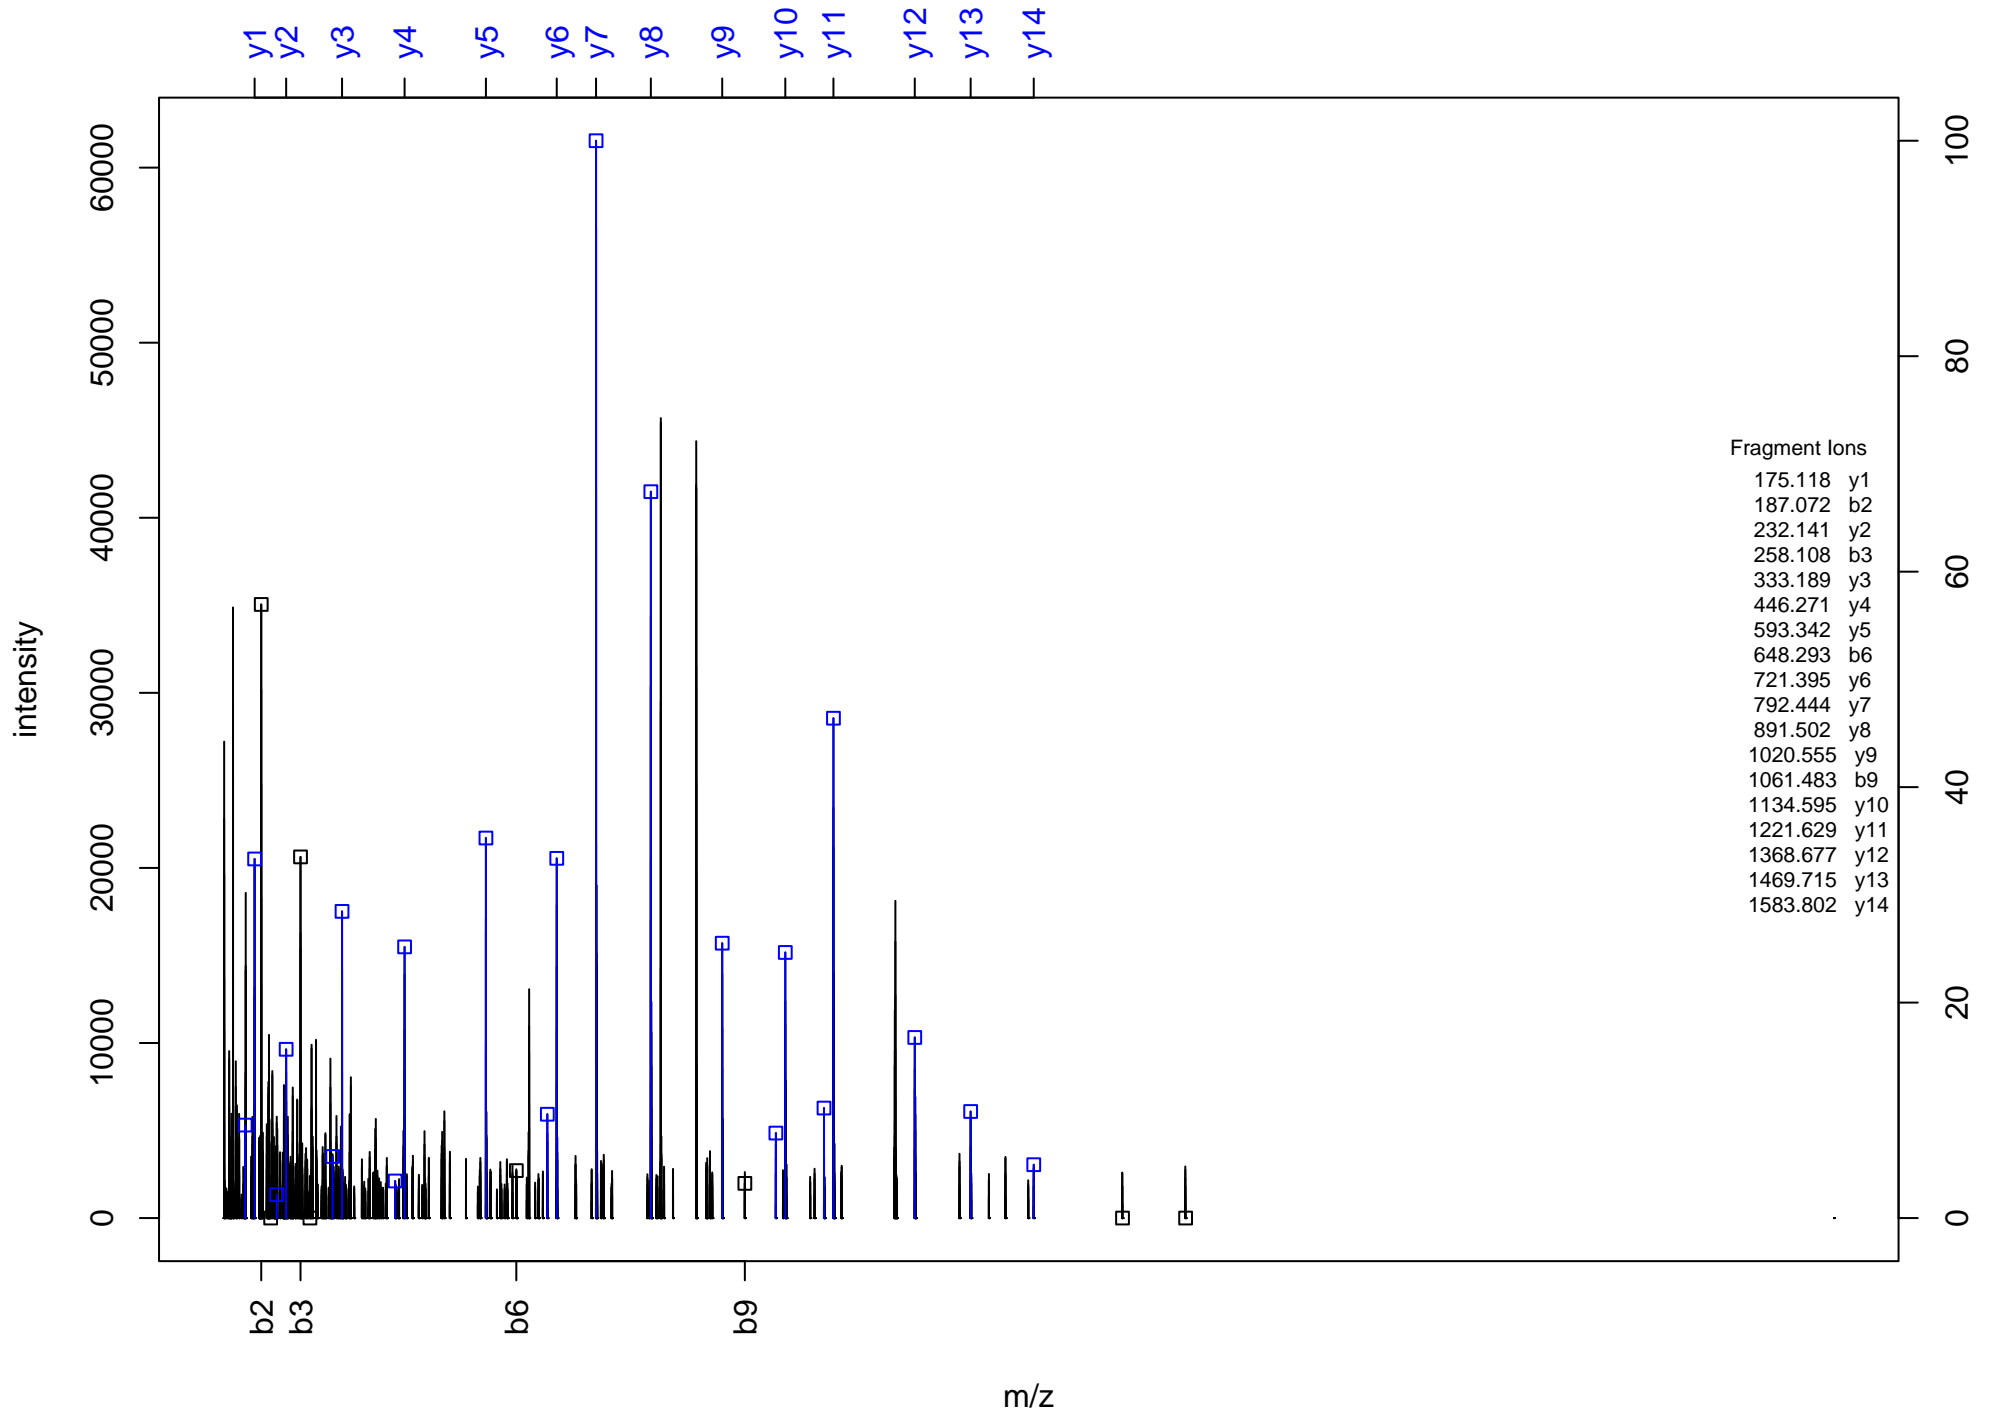

# TRAFN<sup>^</sup>DAEVLYN<sup>^</sup>R

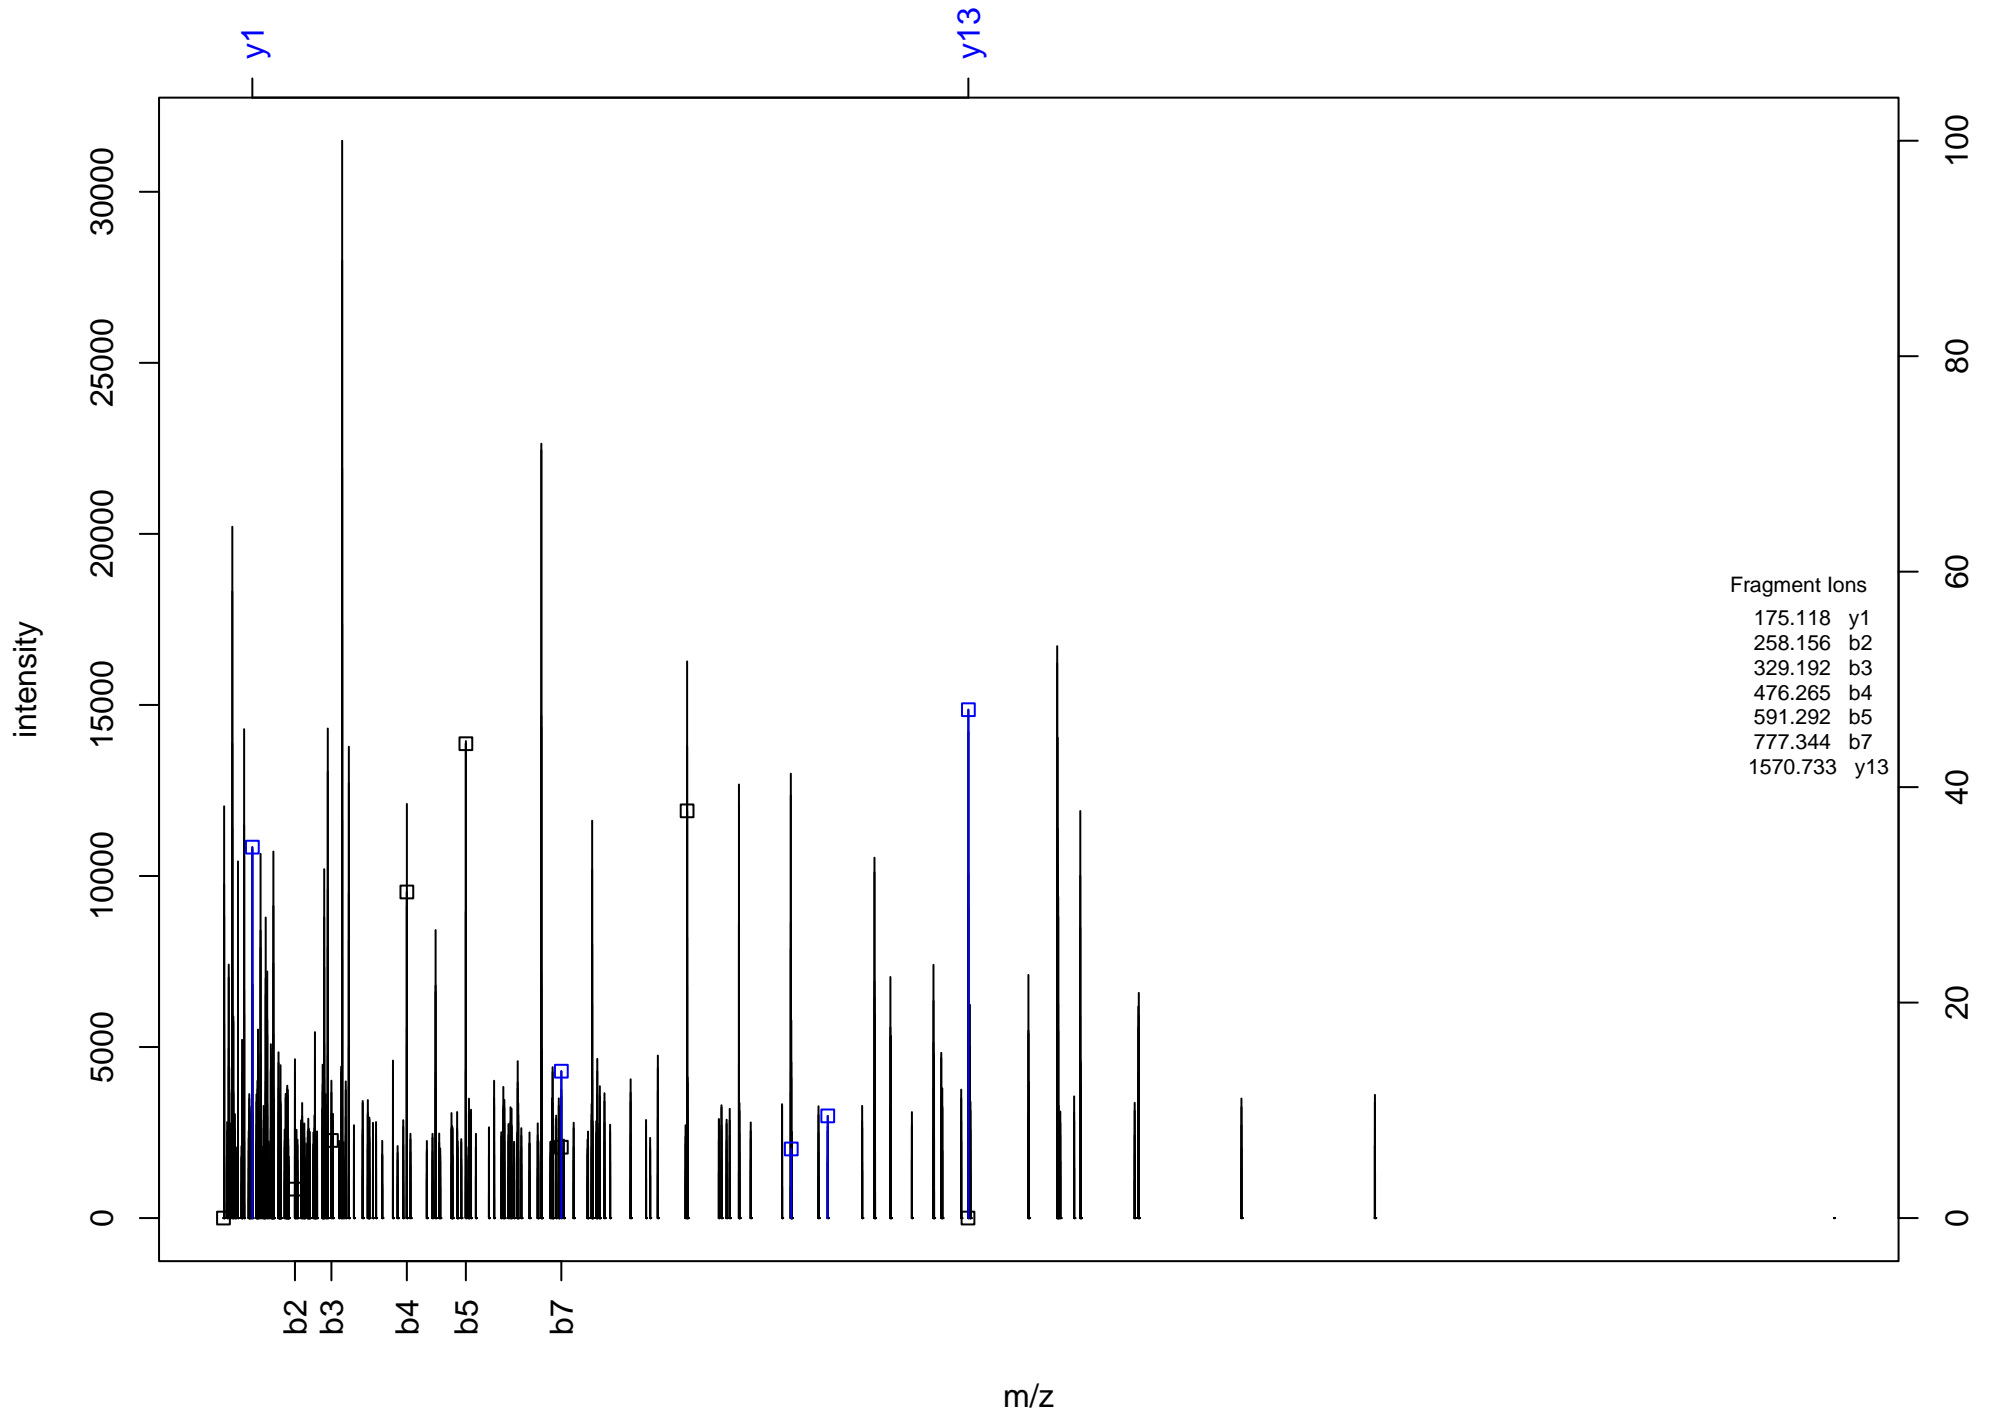



# TYAEILEPFHPVR

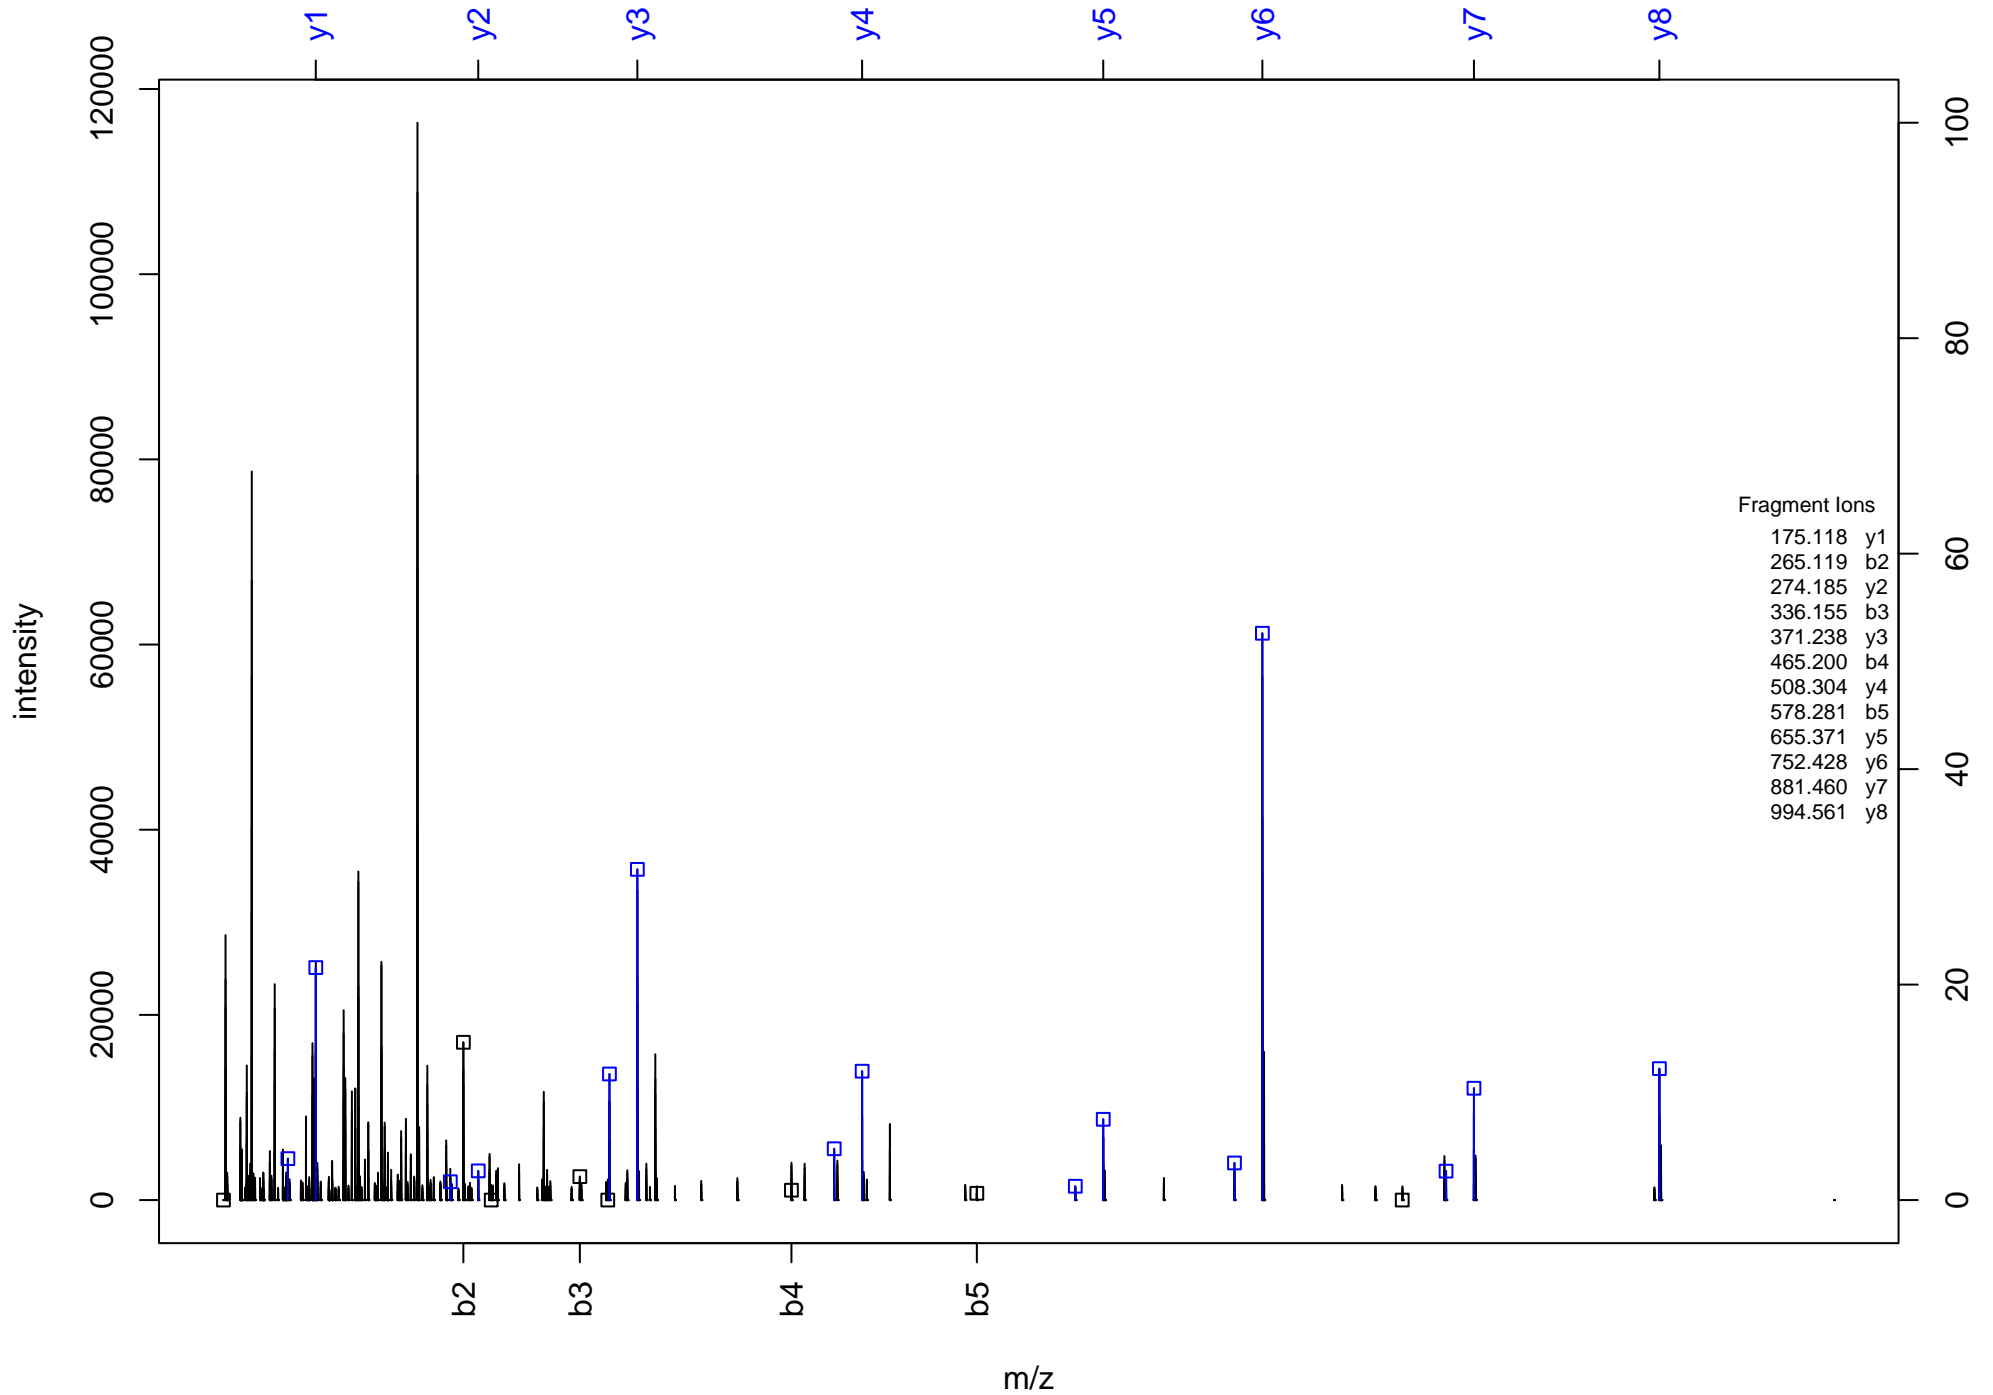

# LNEIVGNEDTVSR

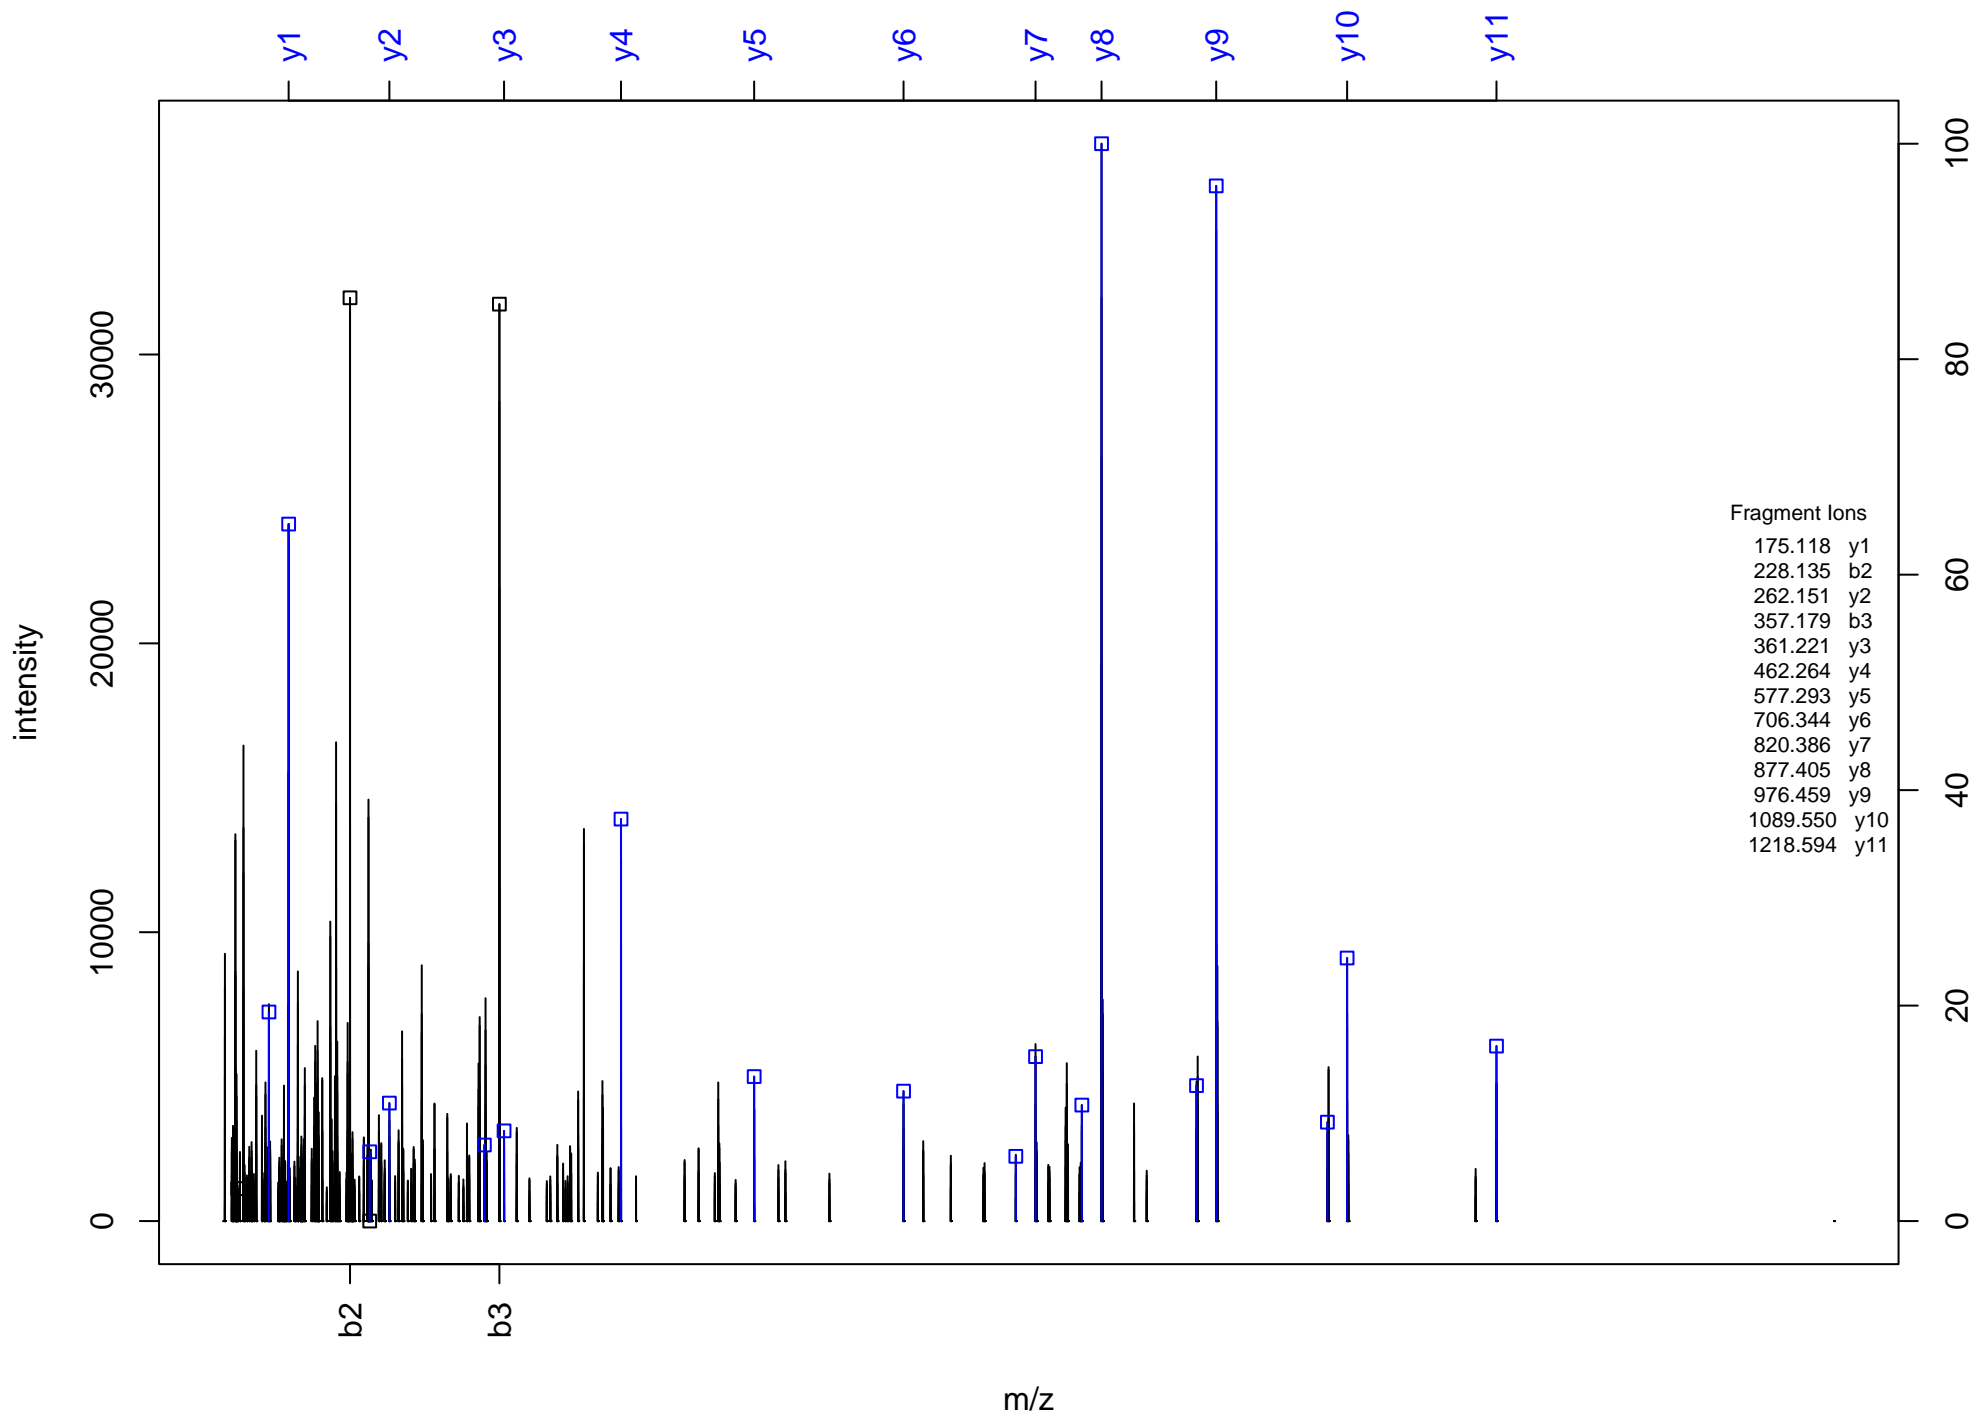

# LQGEVVAFDYQSK

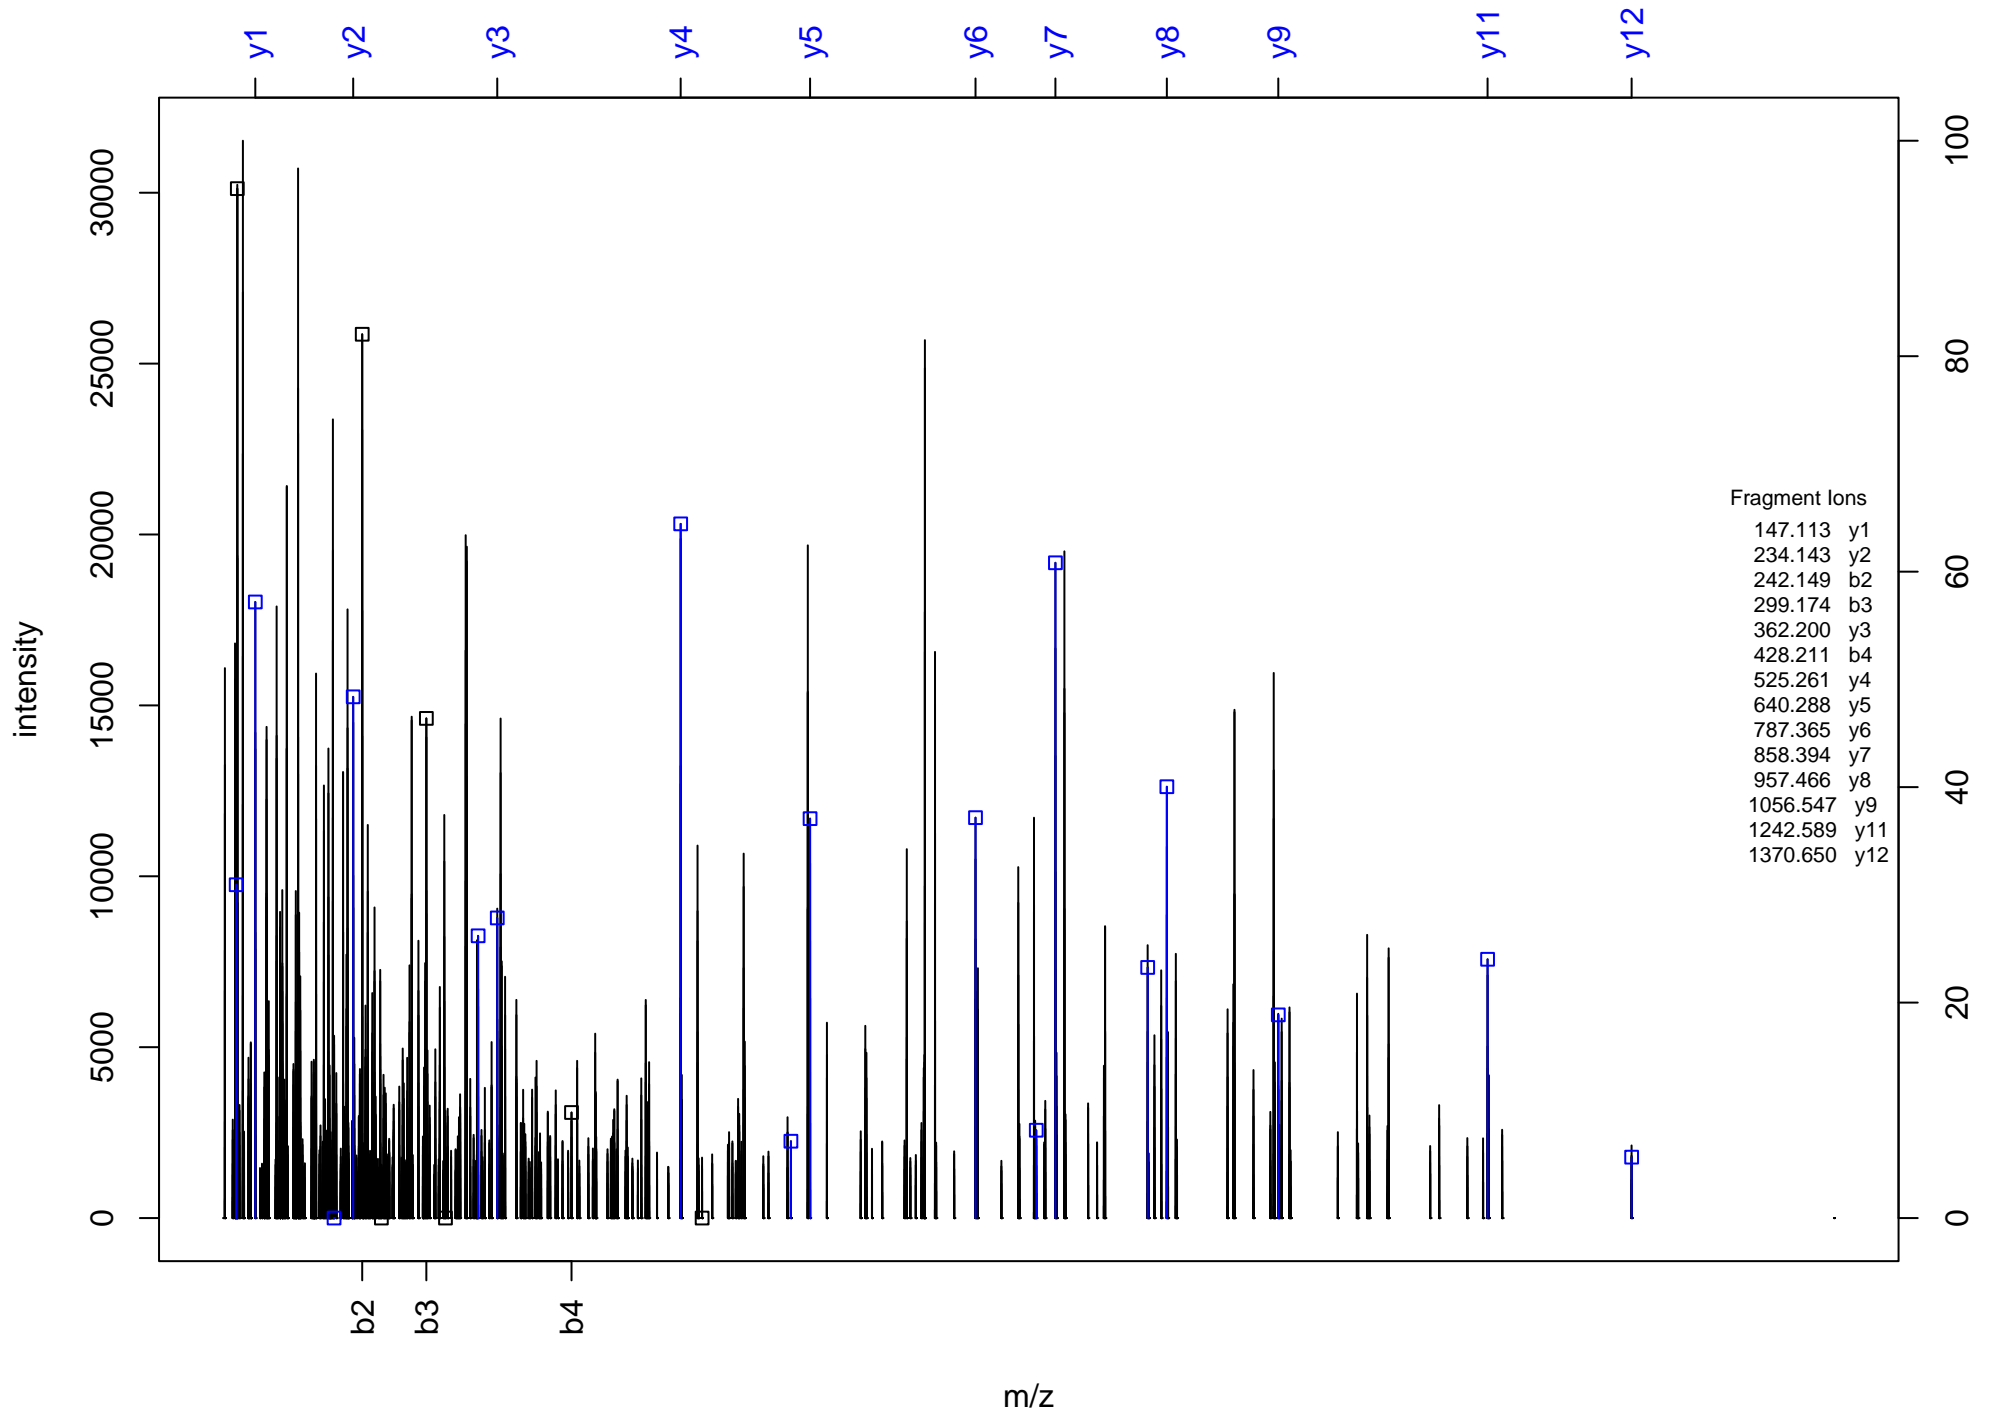

# LGDQDVWMLPQVEWQPGETLR

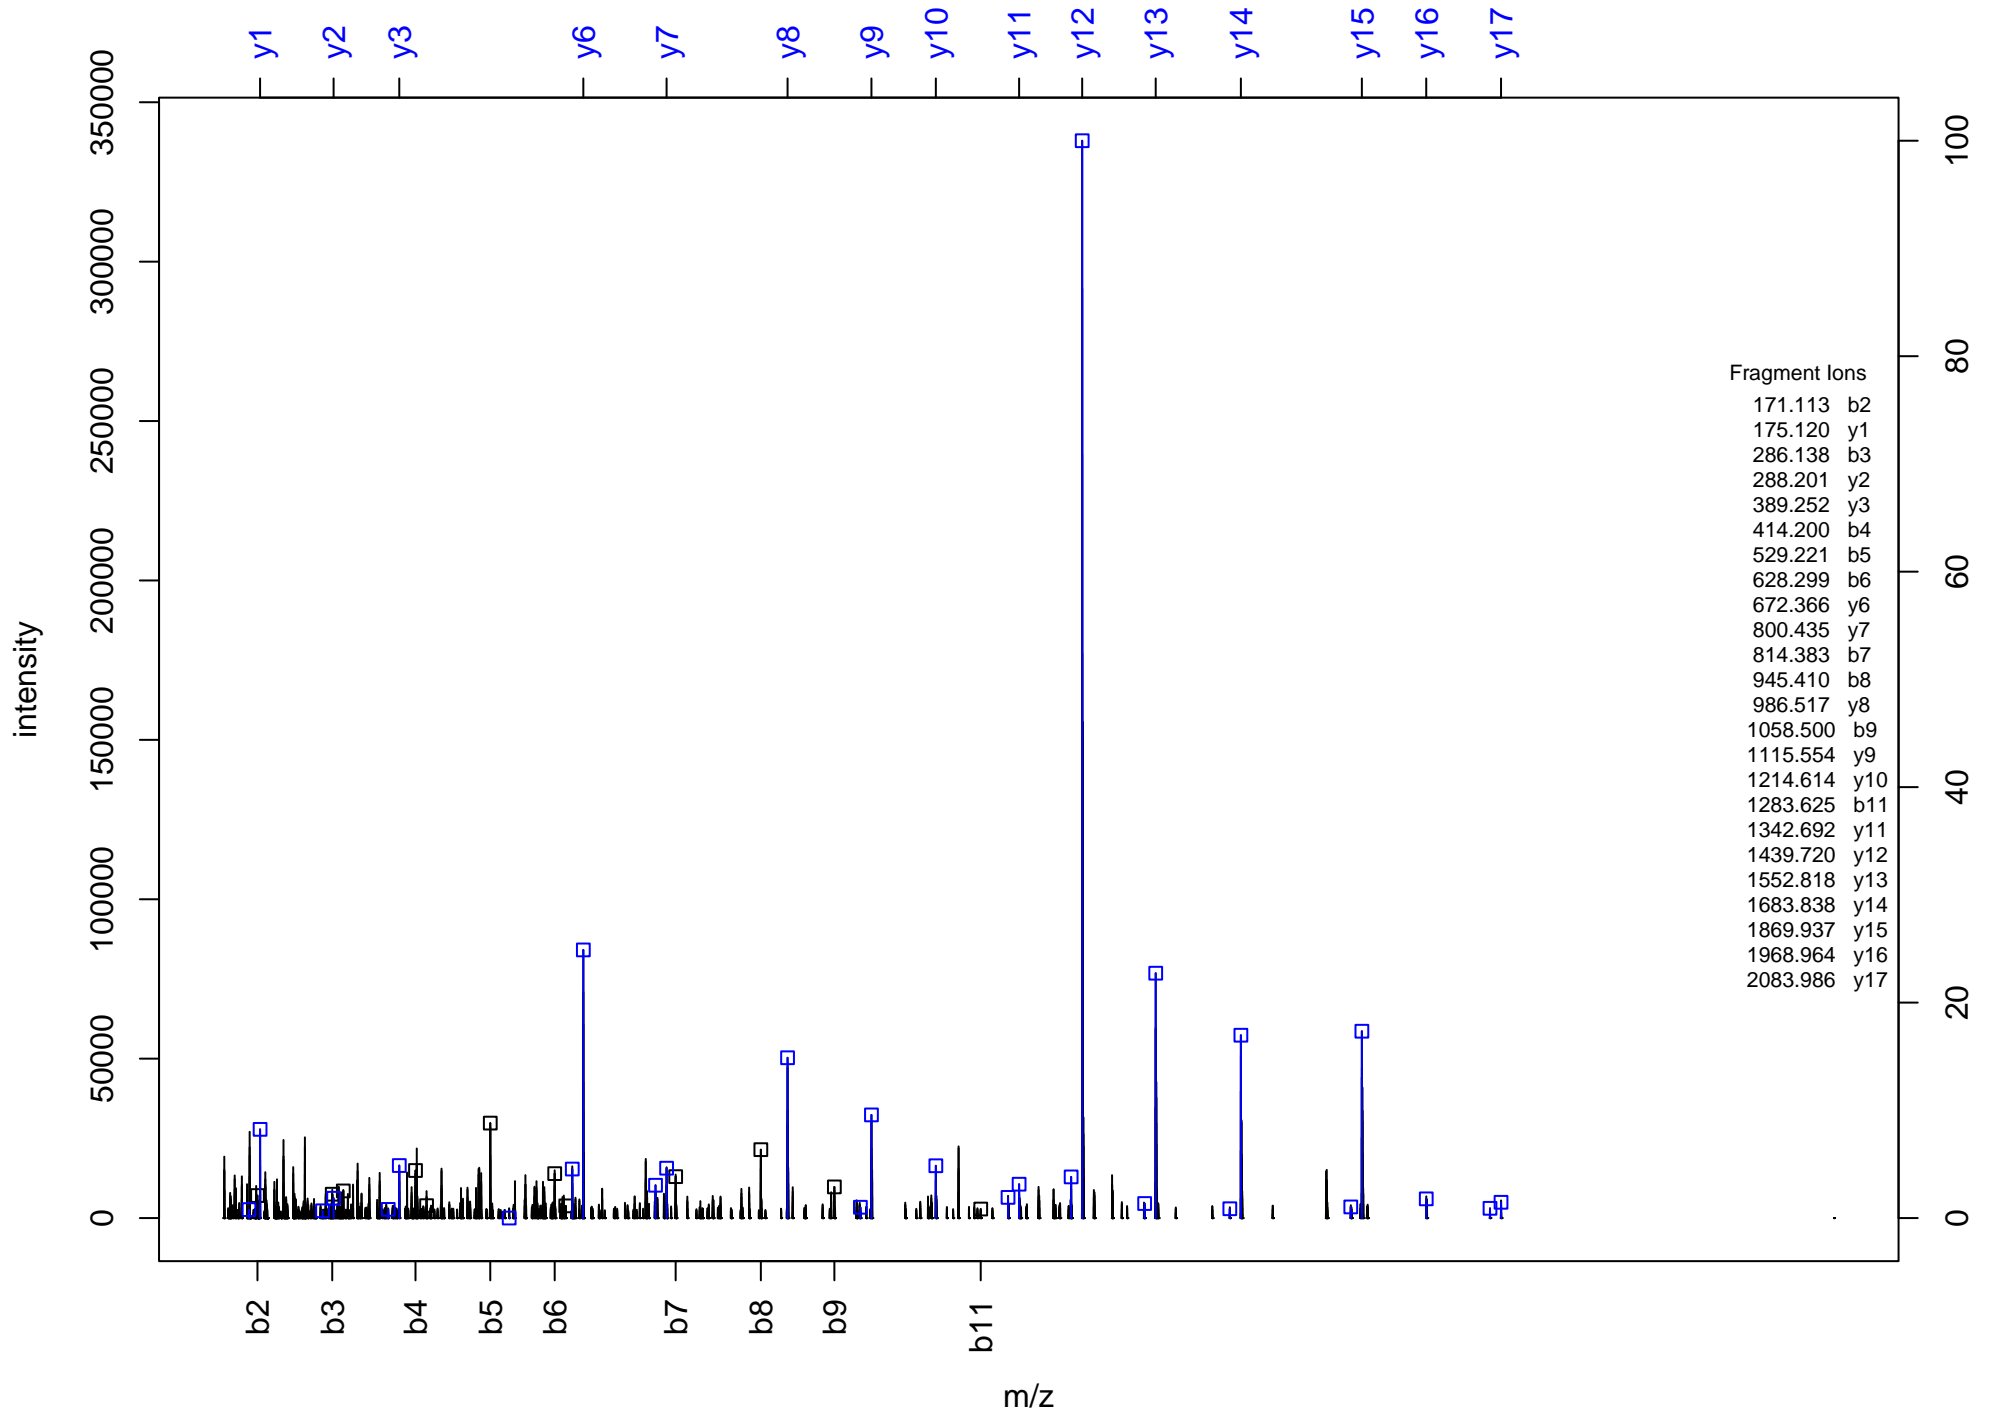

# QQLPSVMGSPVEGVLEDIK

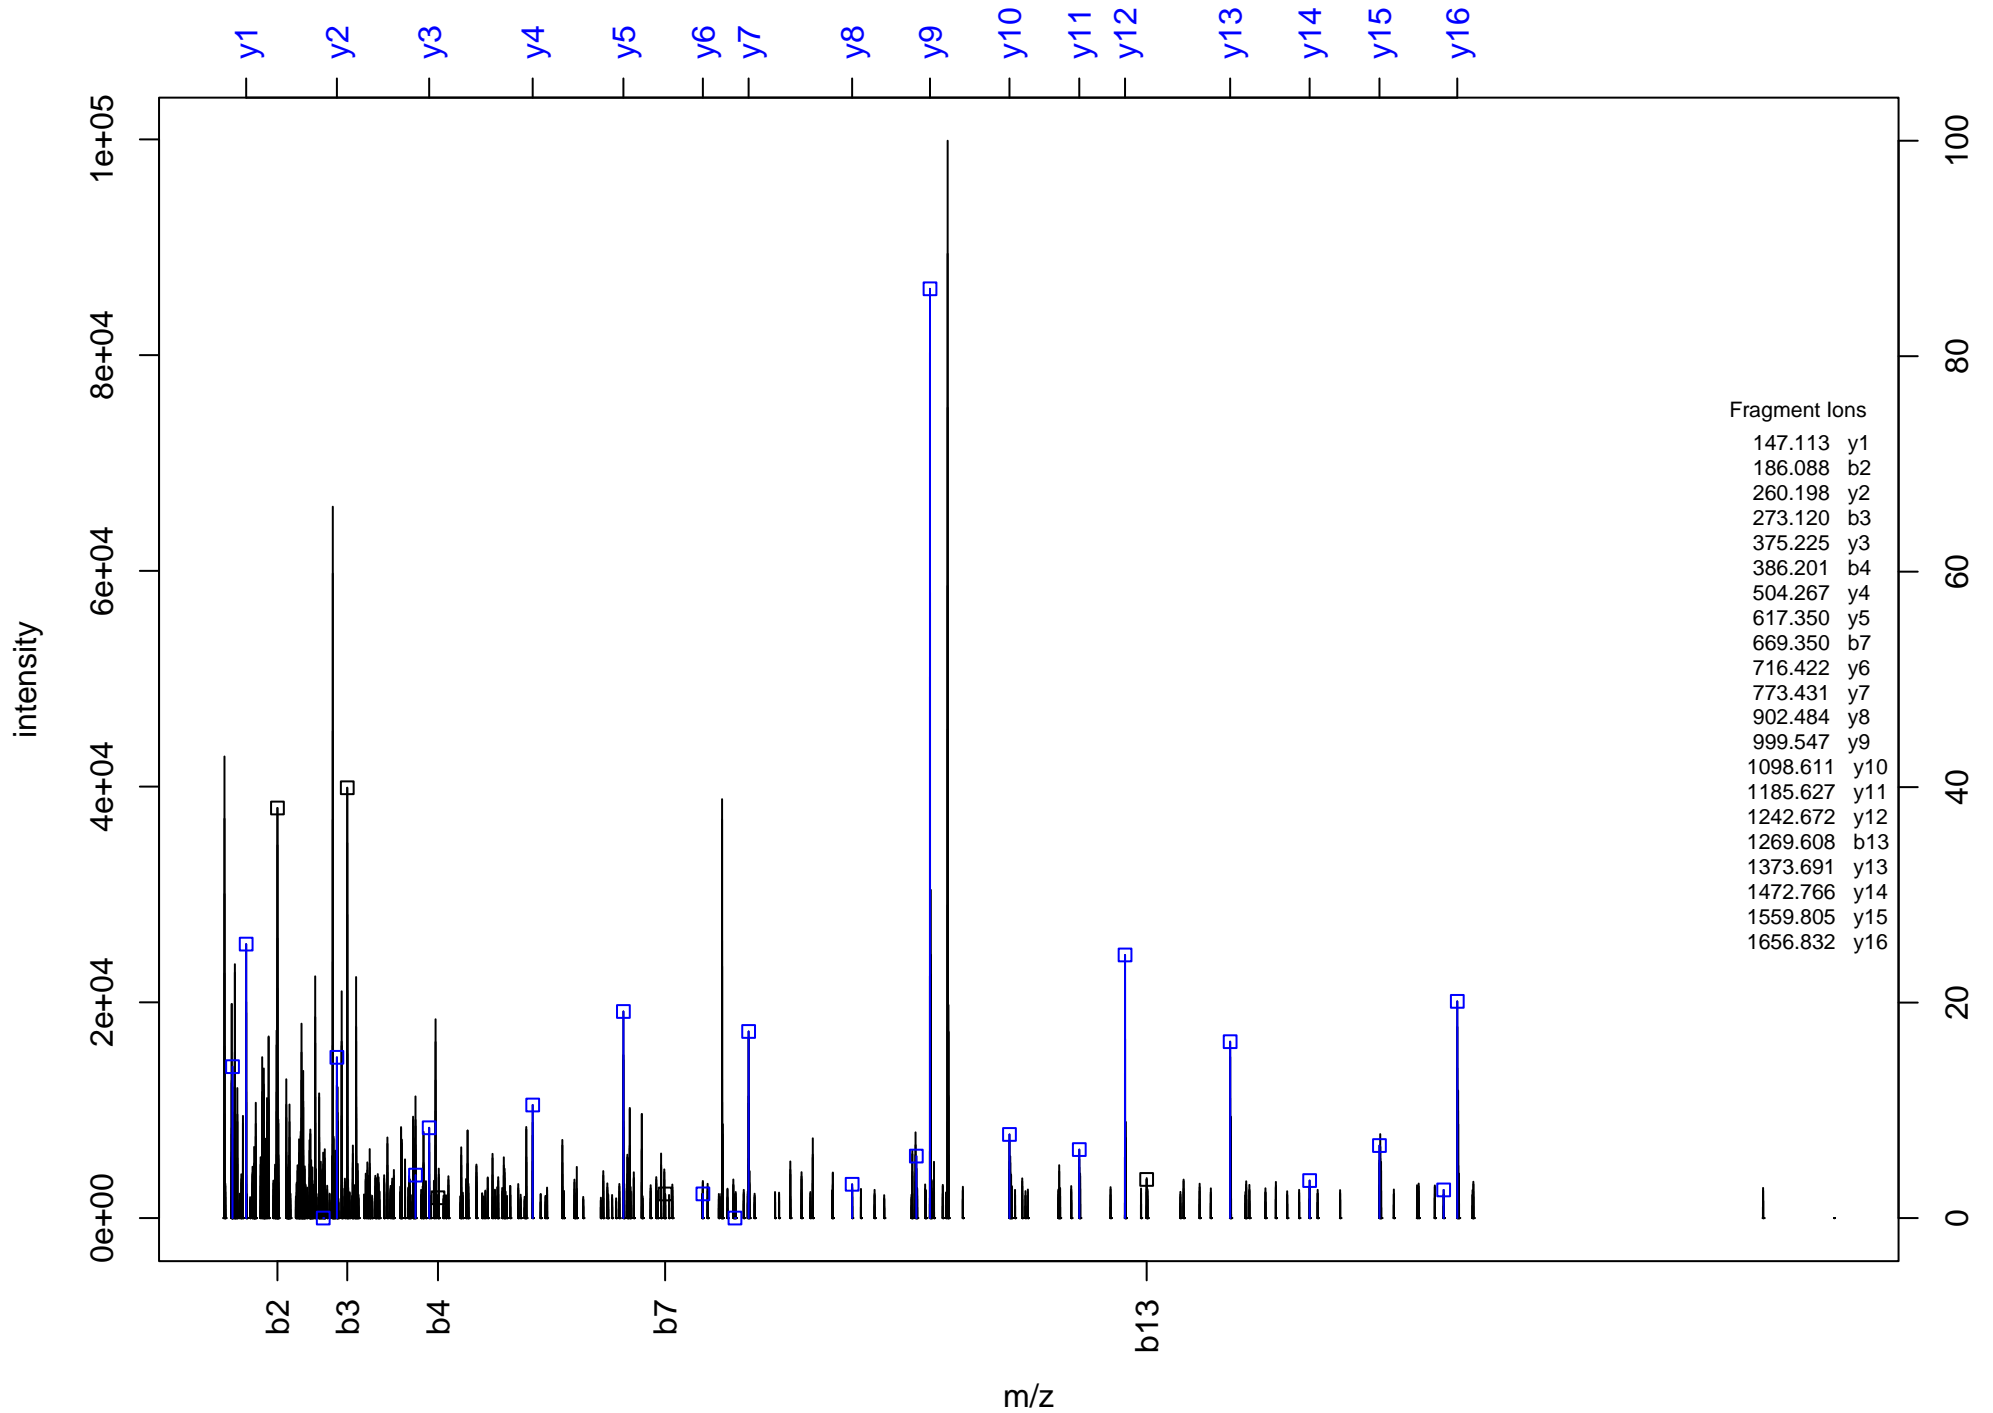

# TIAAASVQTL PQSQSTPK

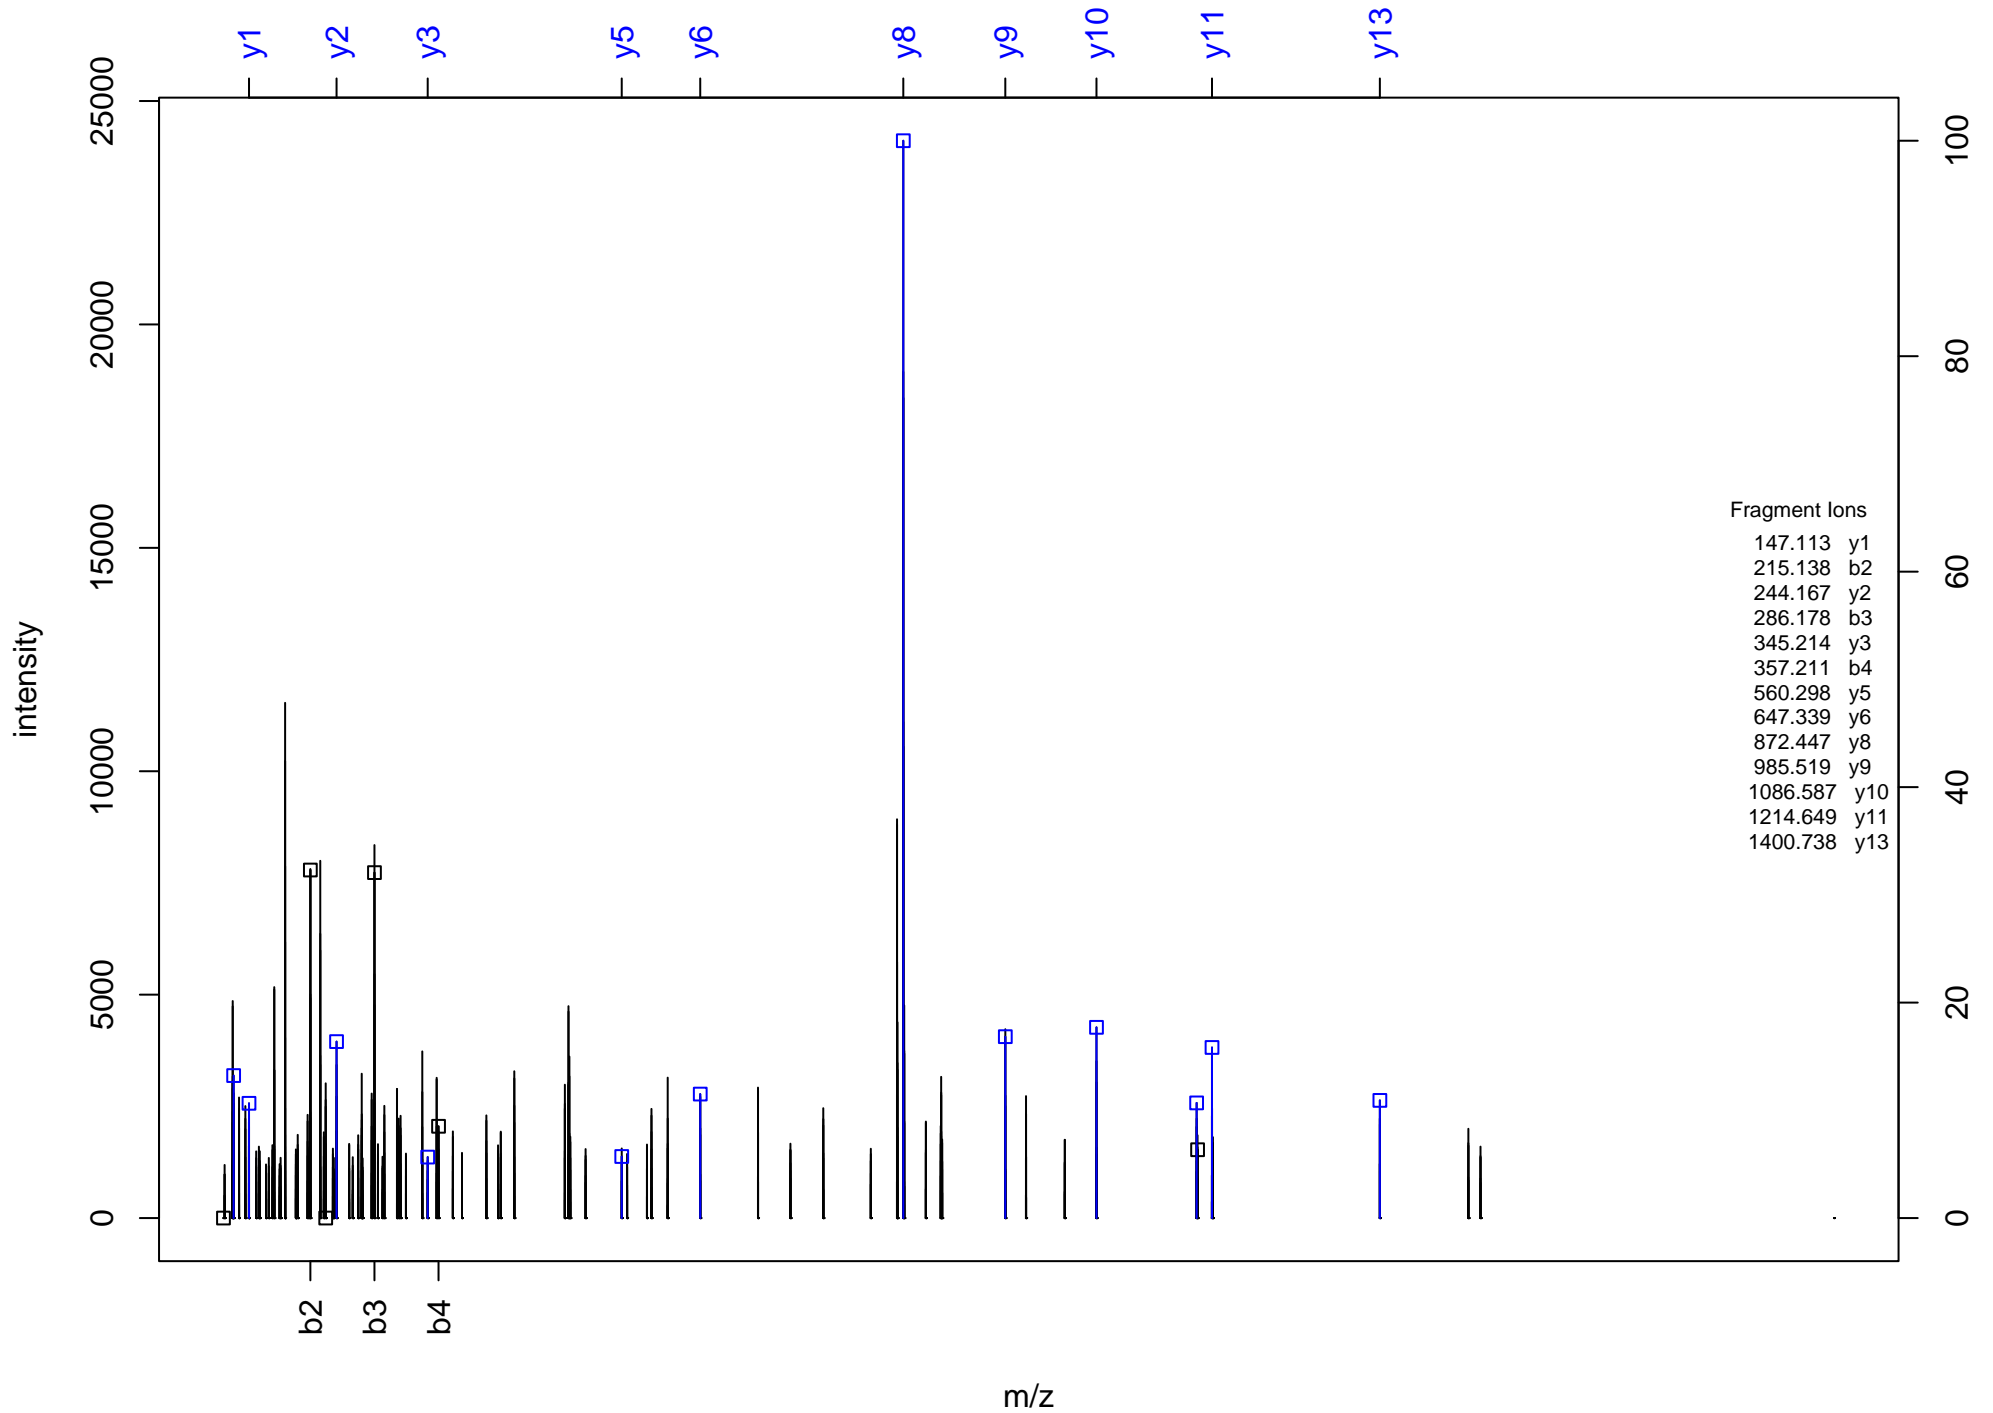

# FAEDSAEAAVSVPEER

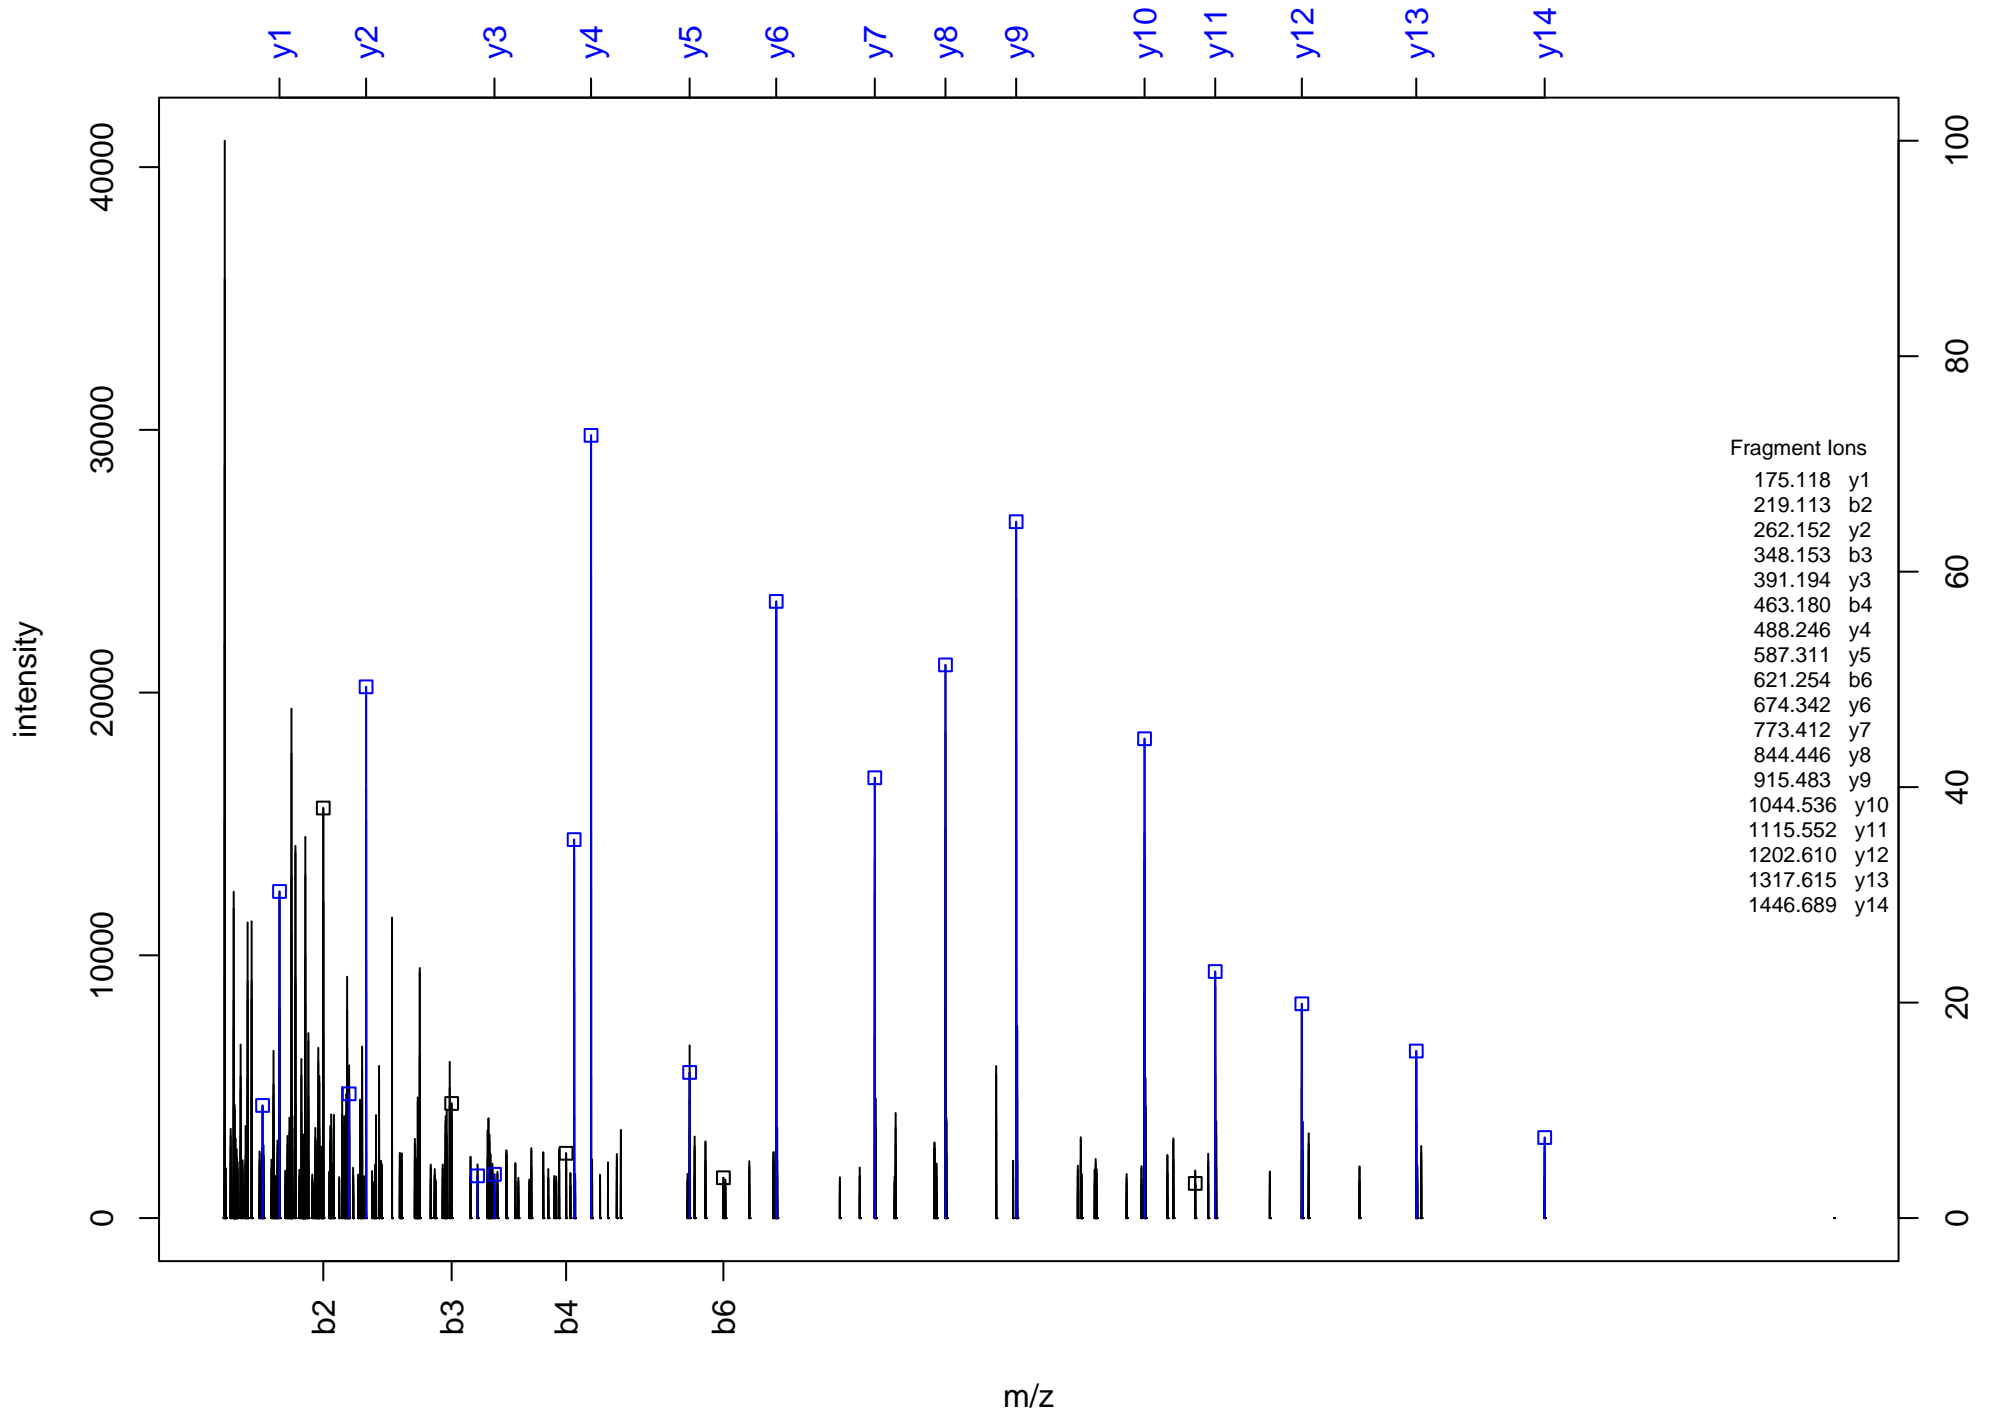

# LLESWTLVR

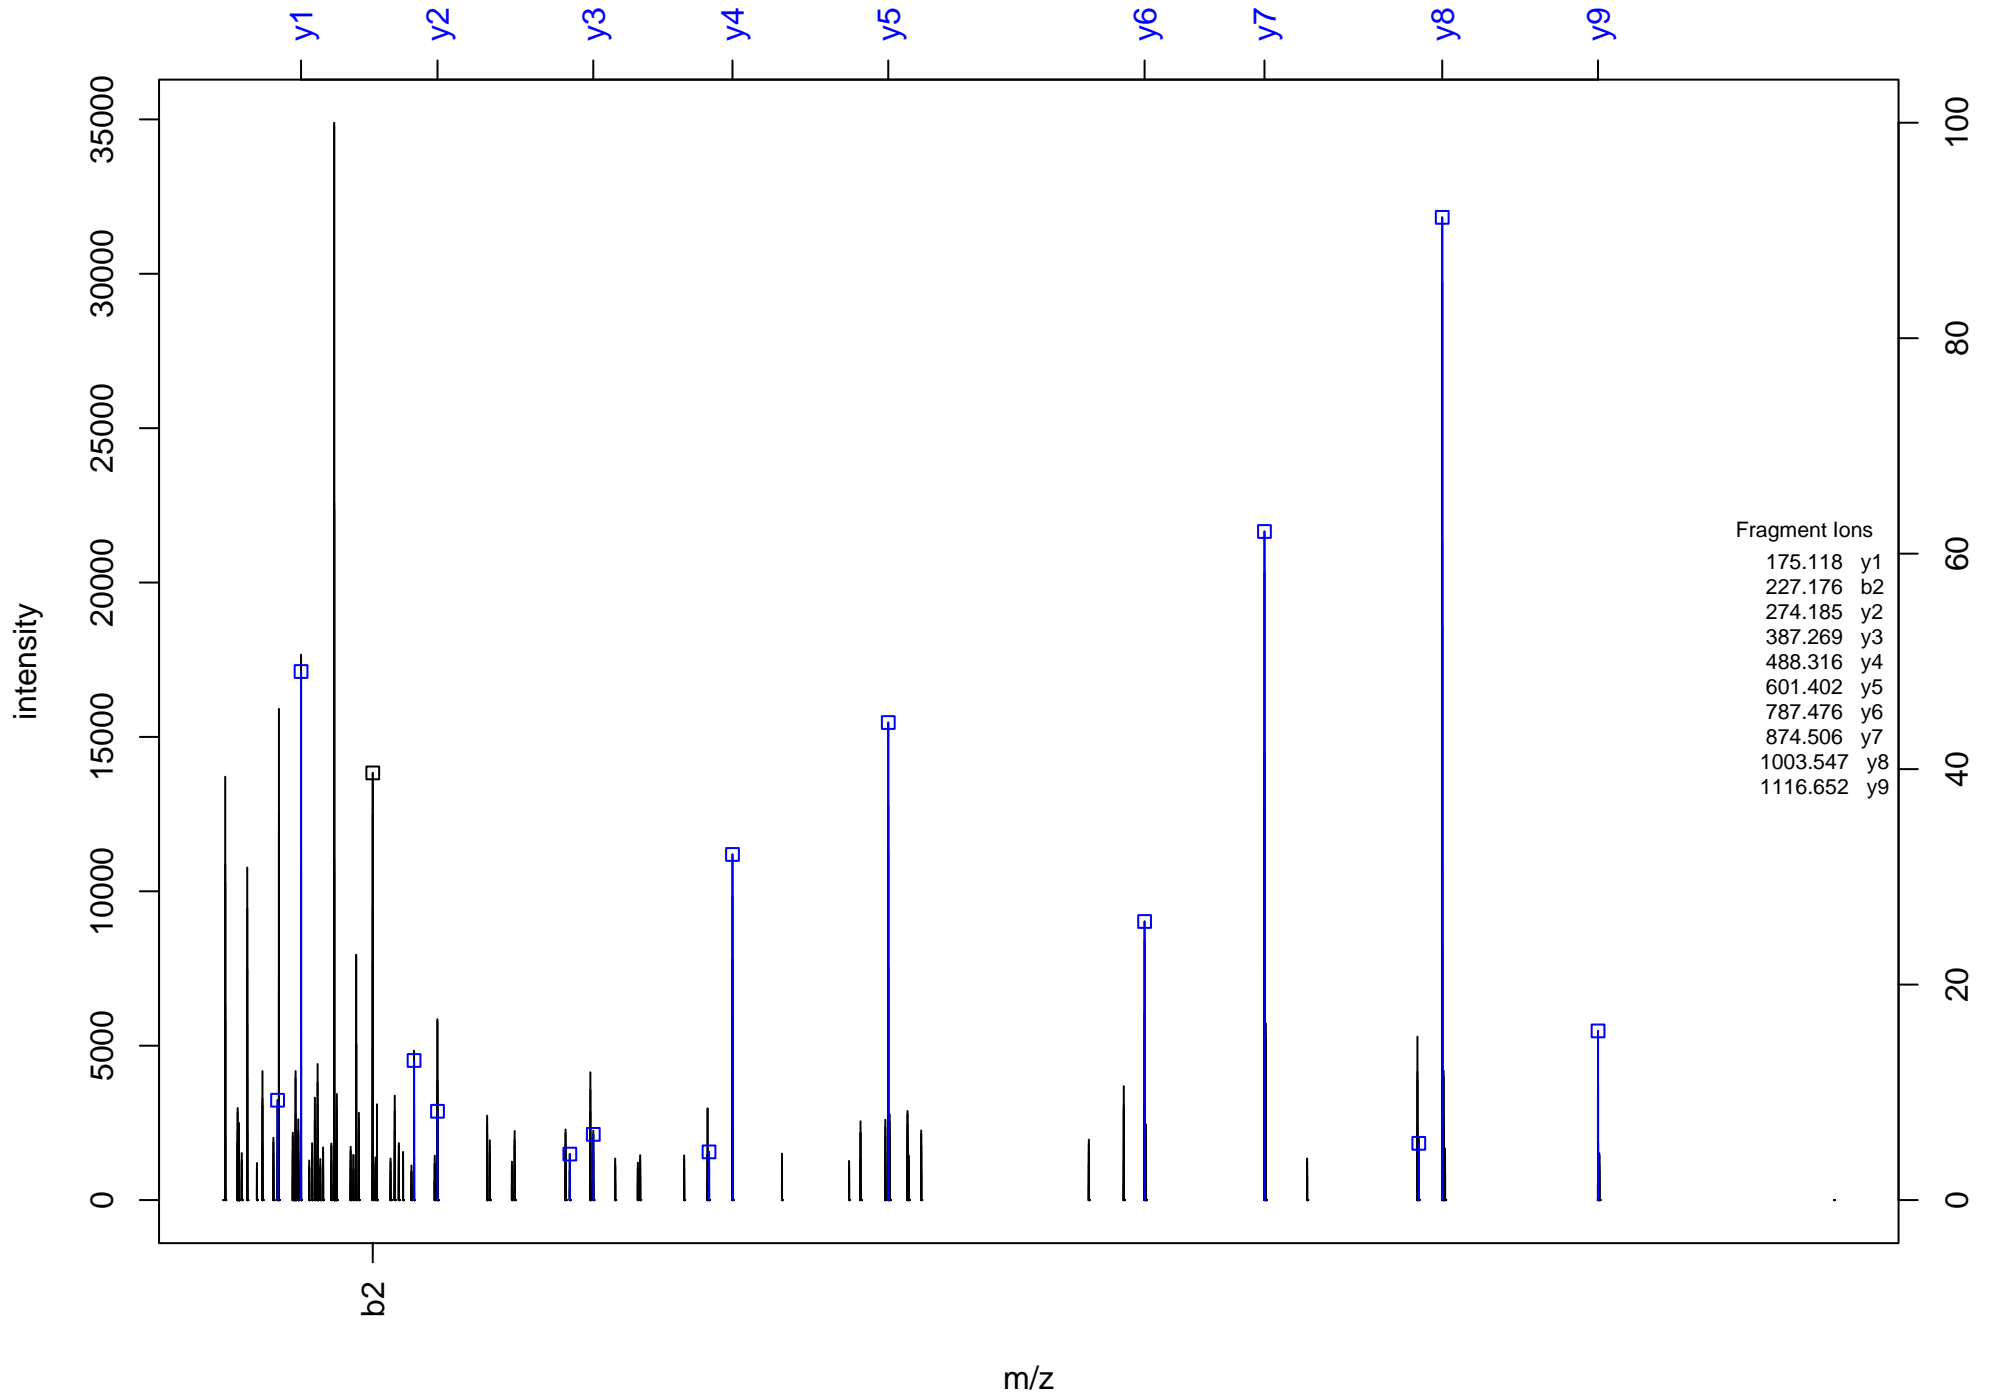



# KLSN^VEPSTSTPM\*PR

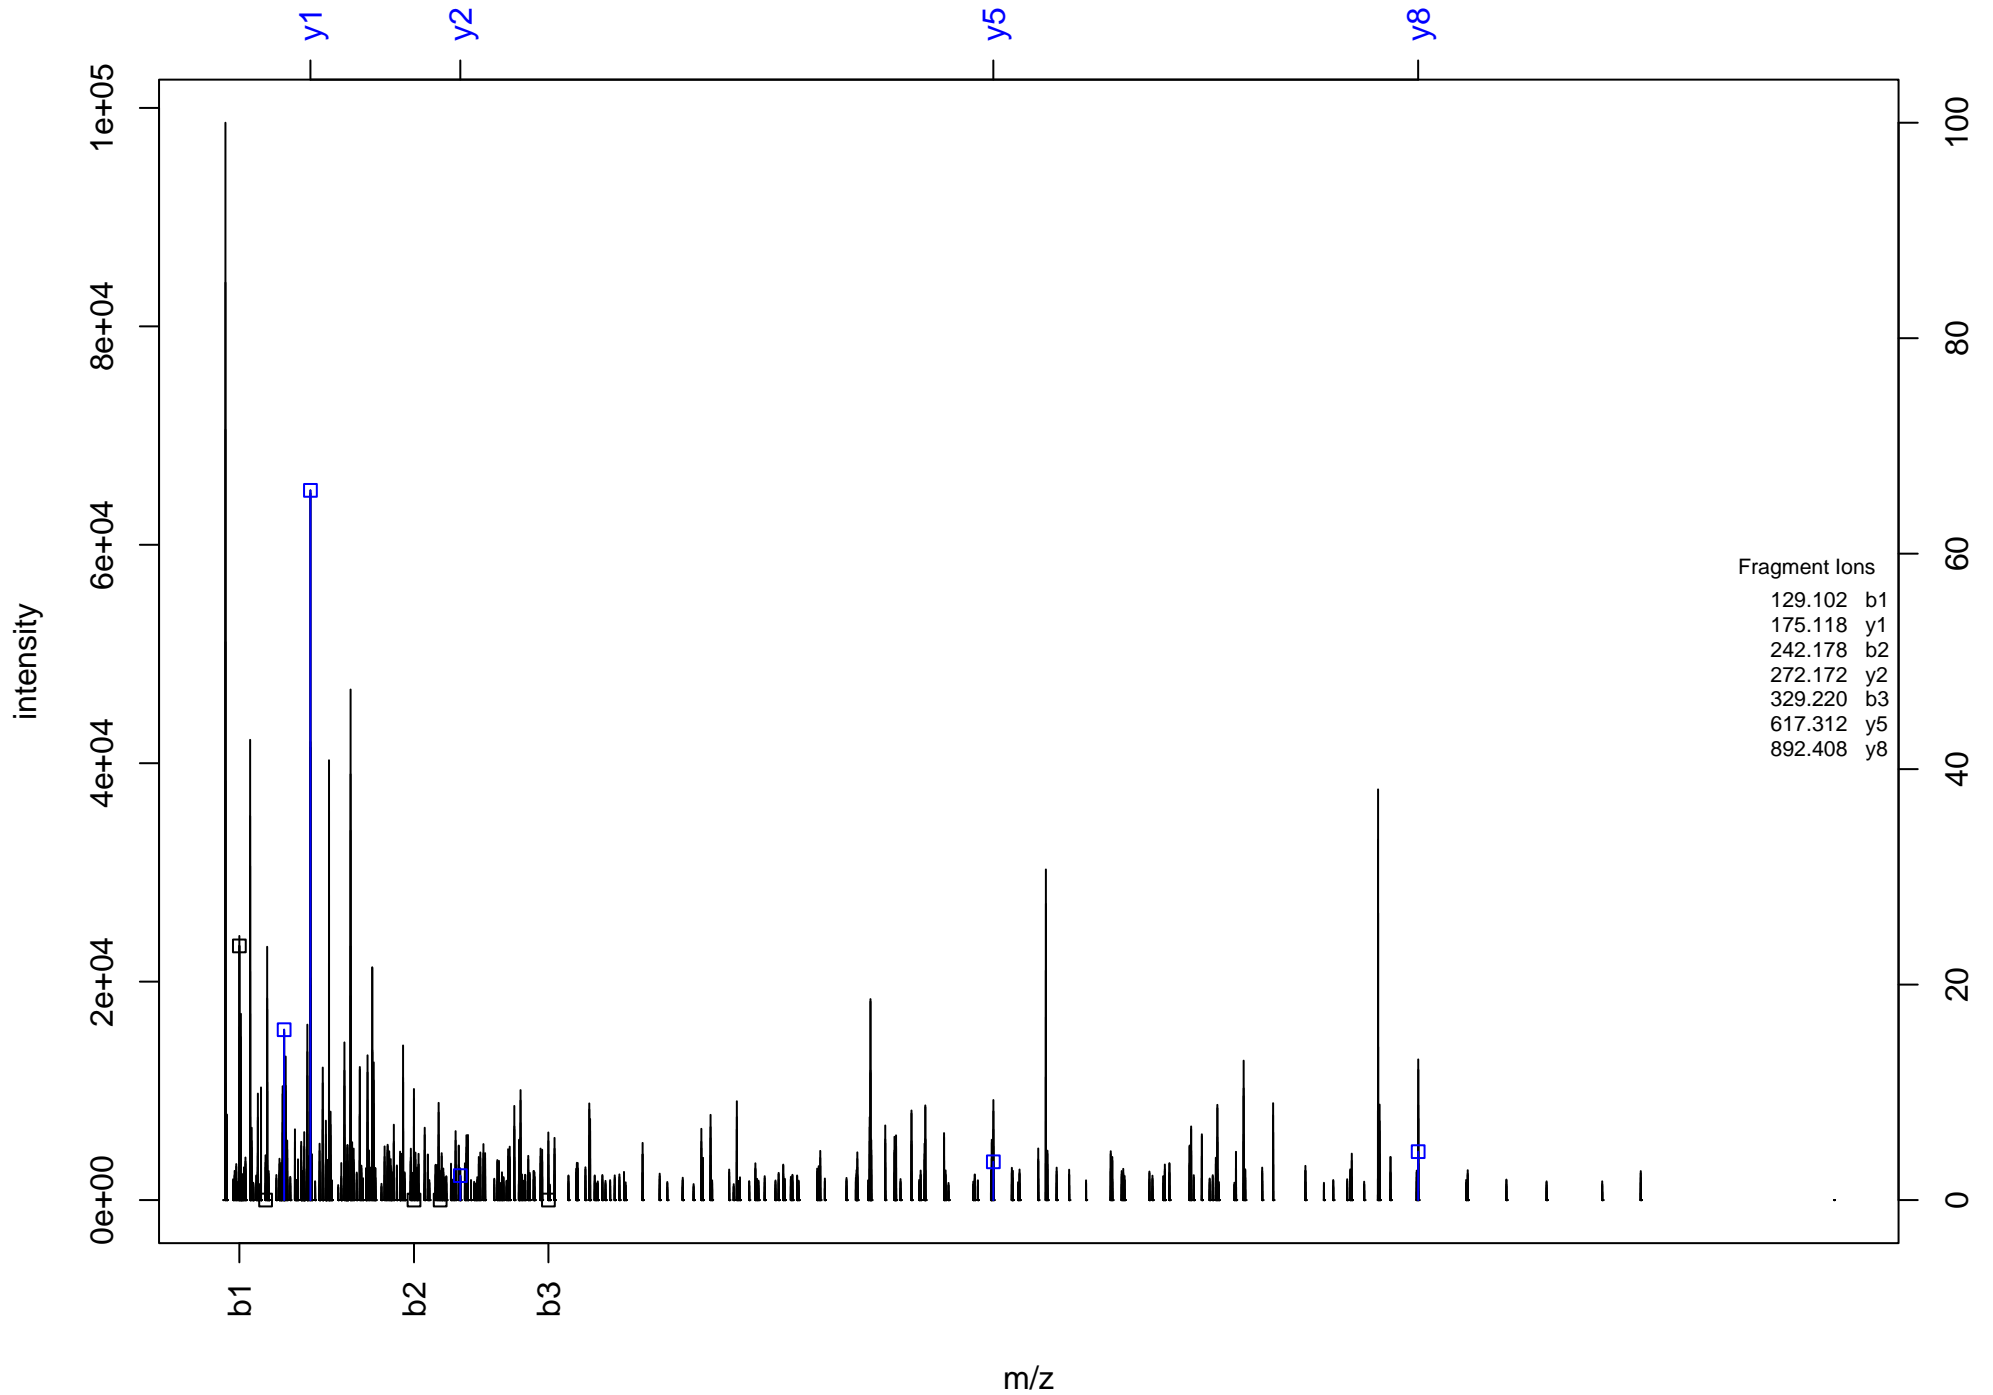

# (Ac)SDEFSLADALPEQSSAKPPAVTNTK

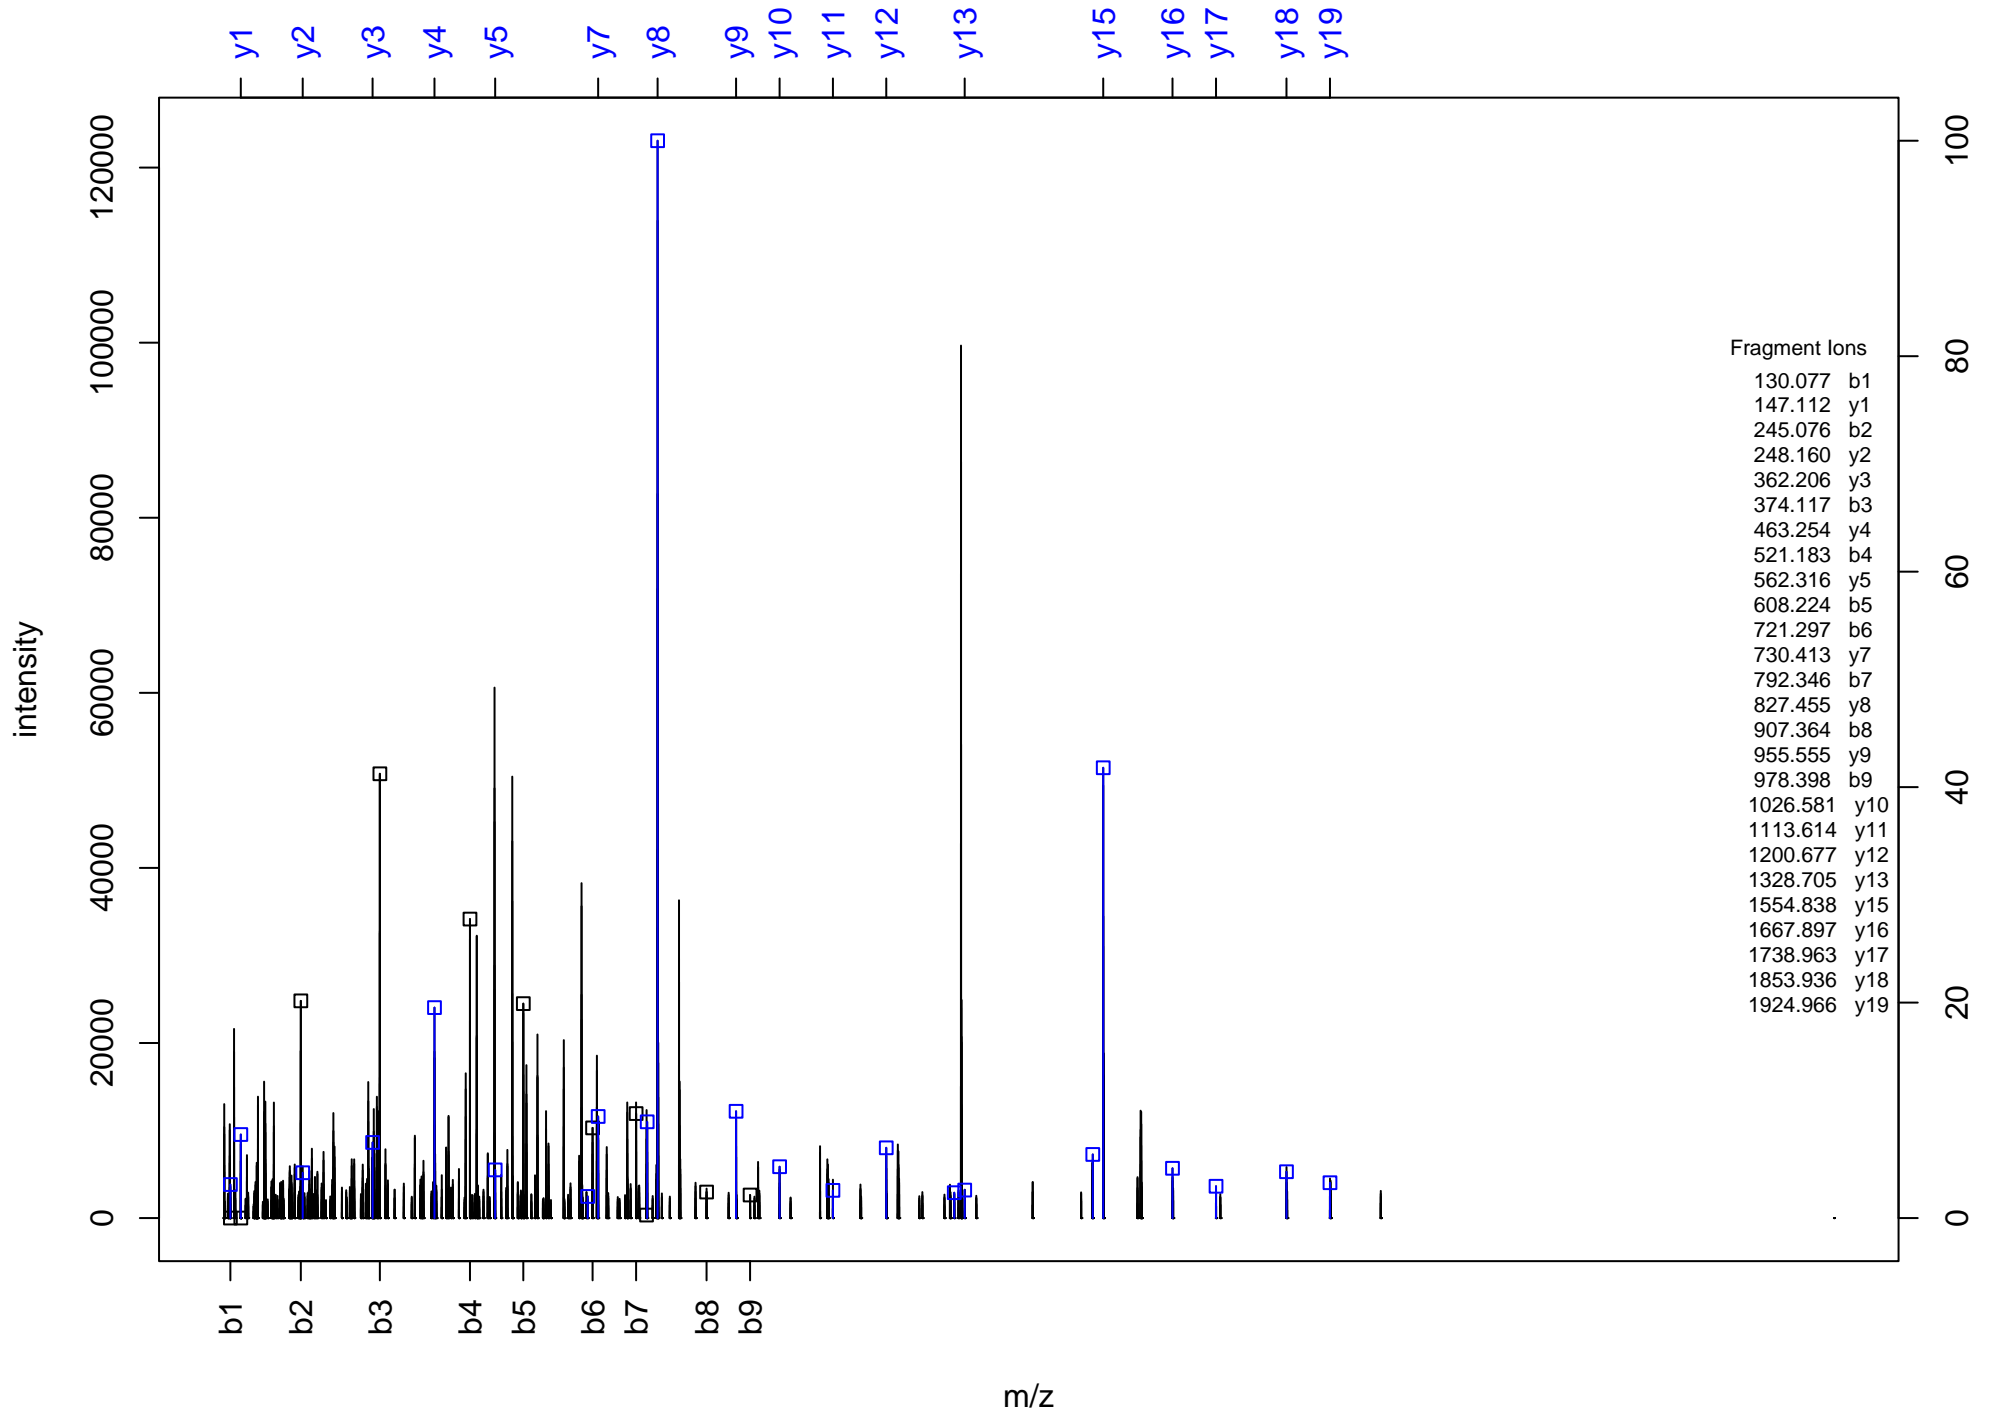

# LALESPEVQDLQLER

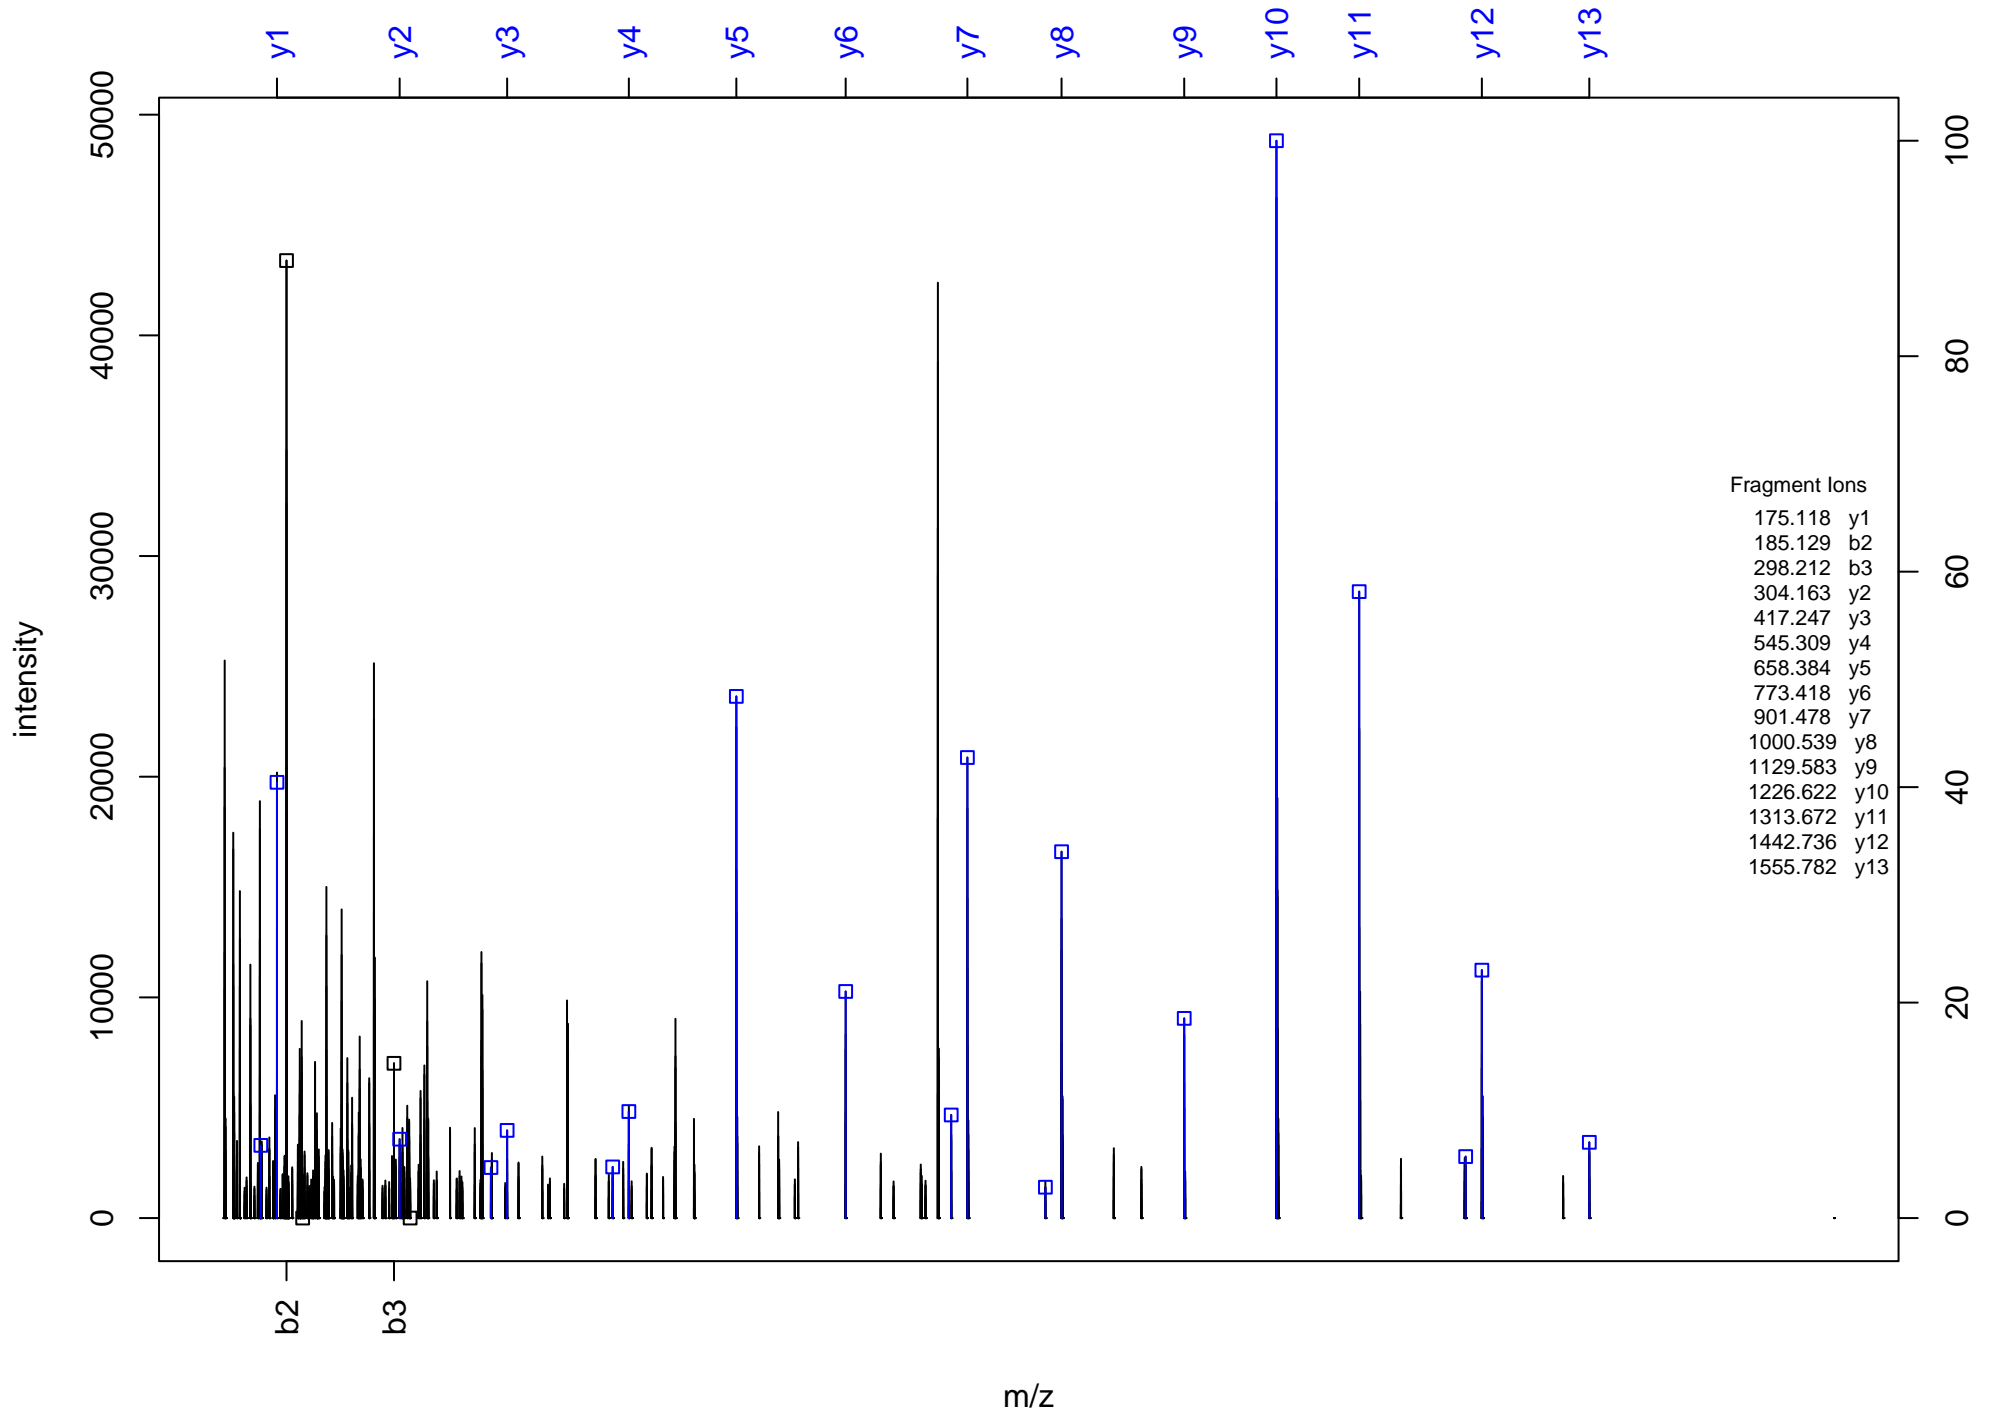

(Ac)M\*KSQ^SWVPKQGN^VR

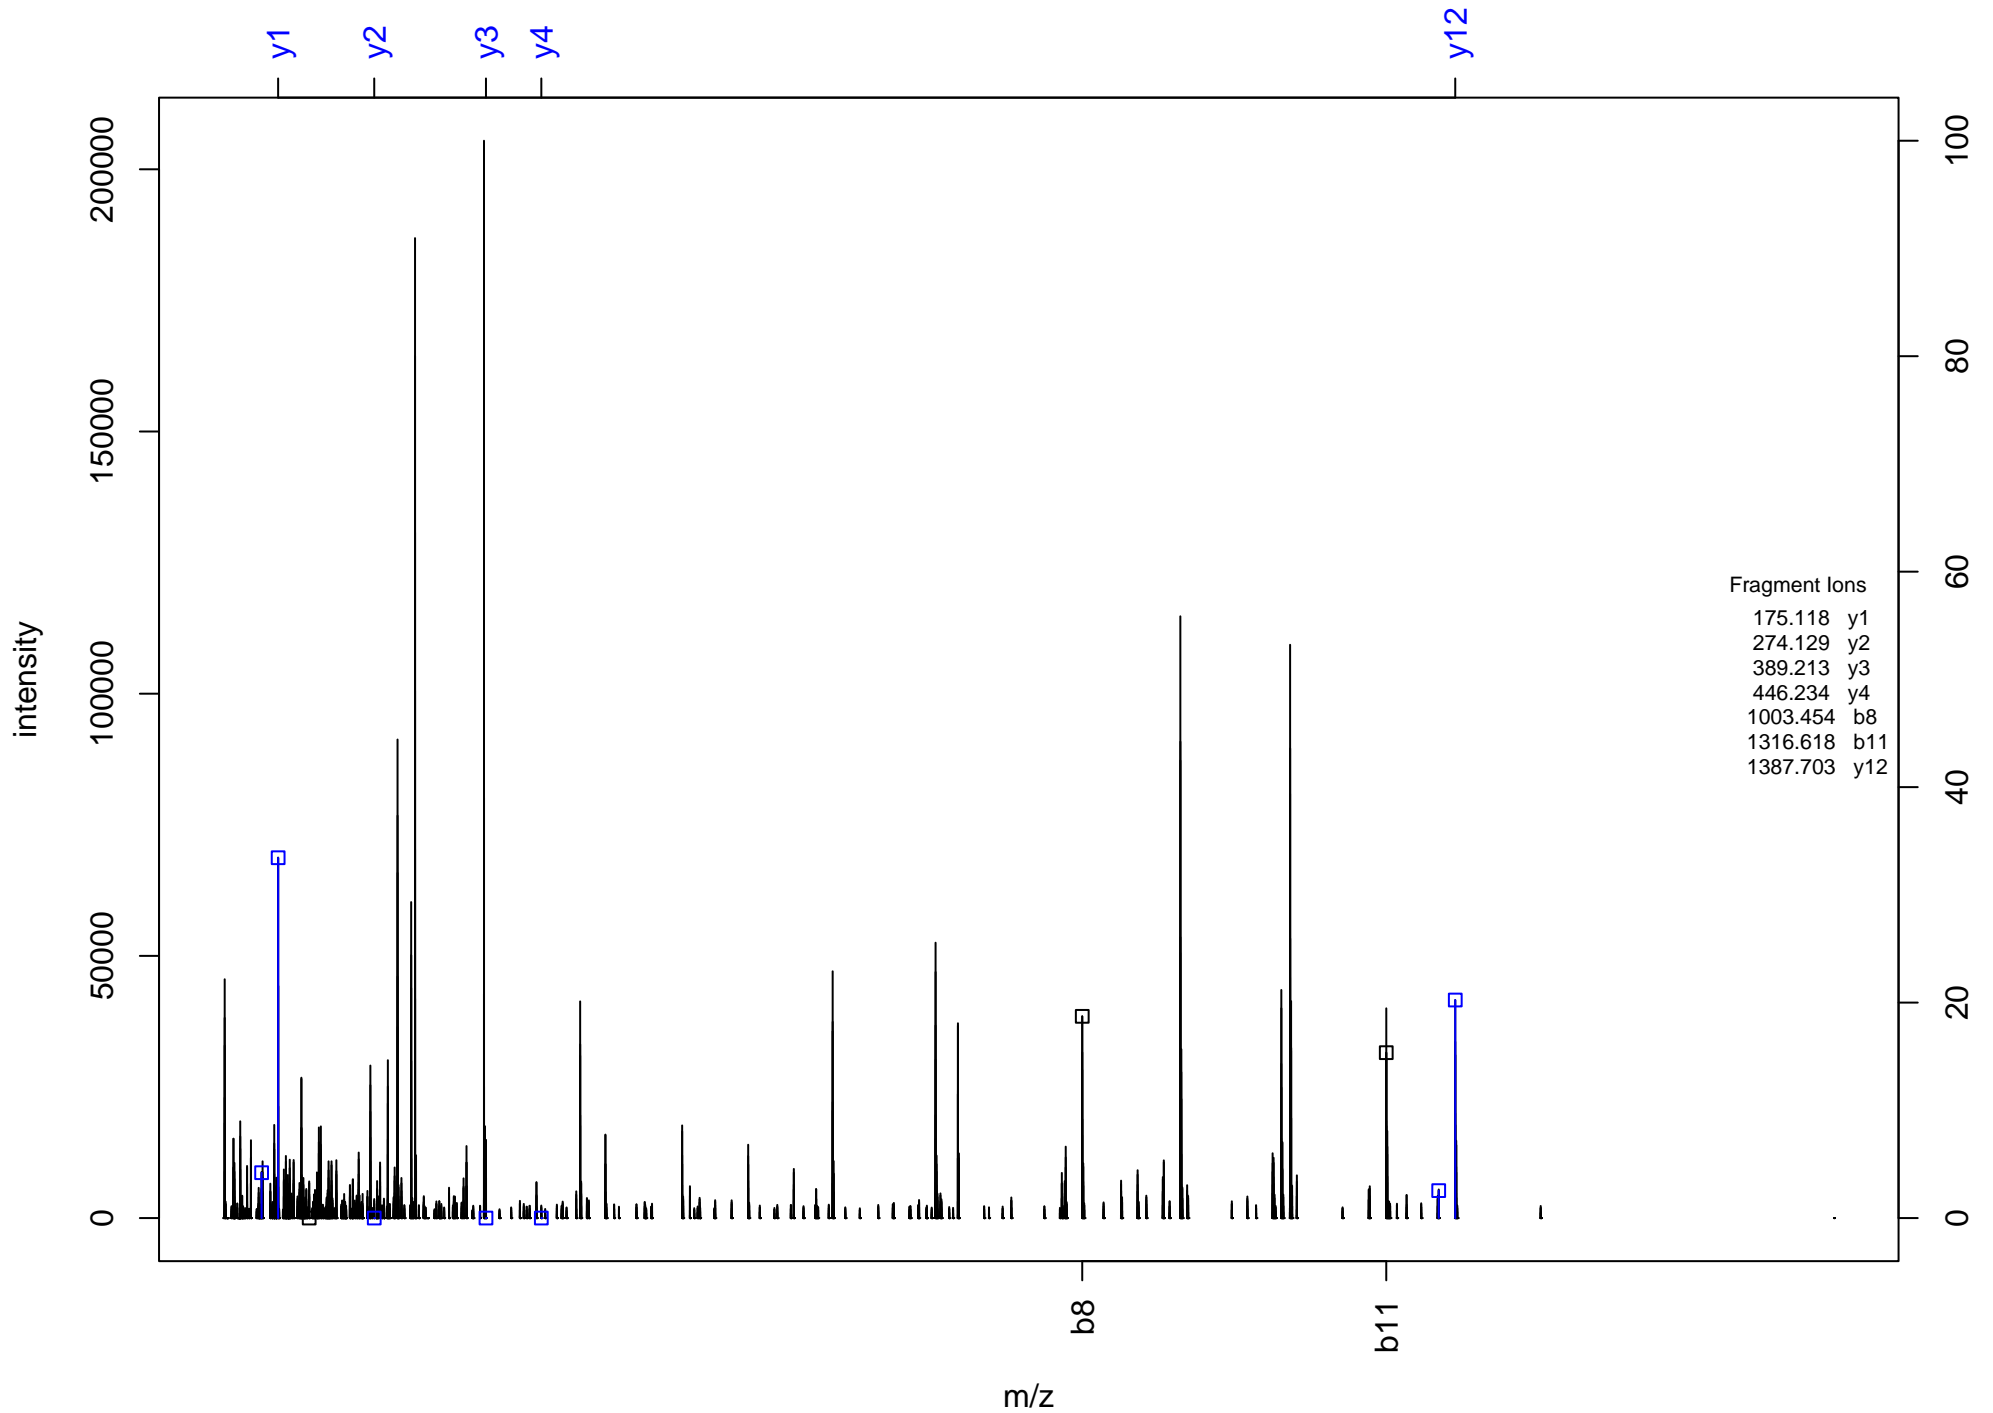

# ILDETQEAVEYQR

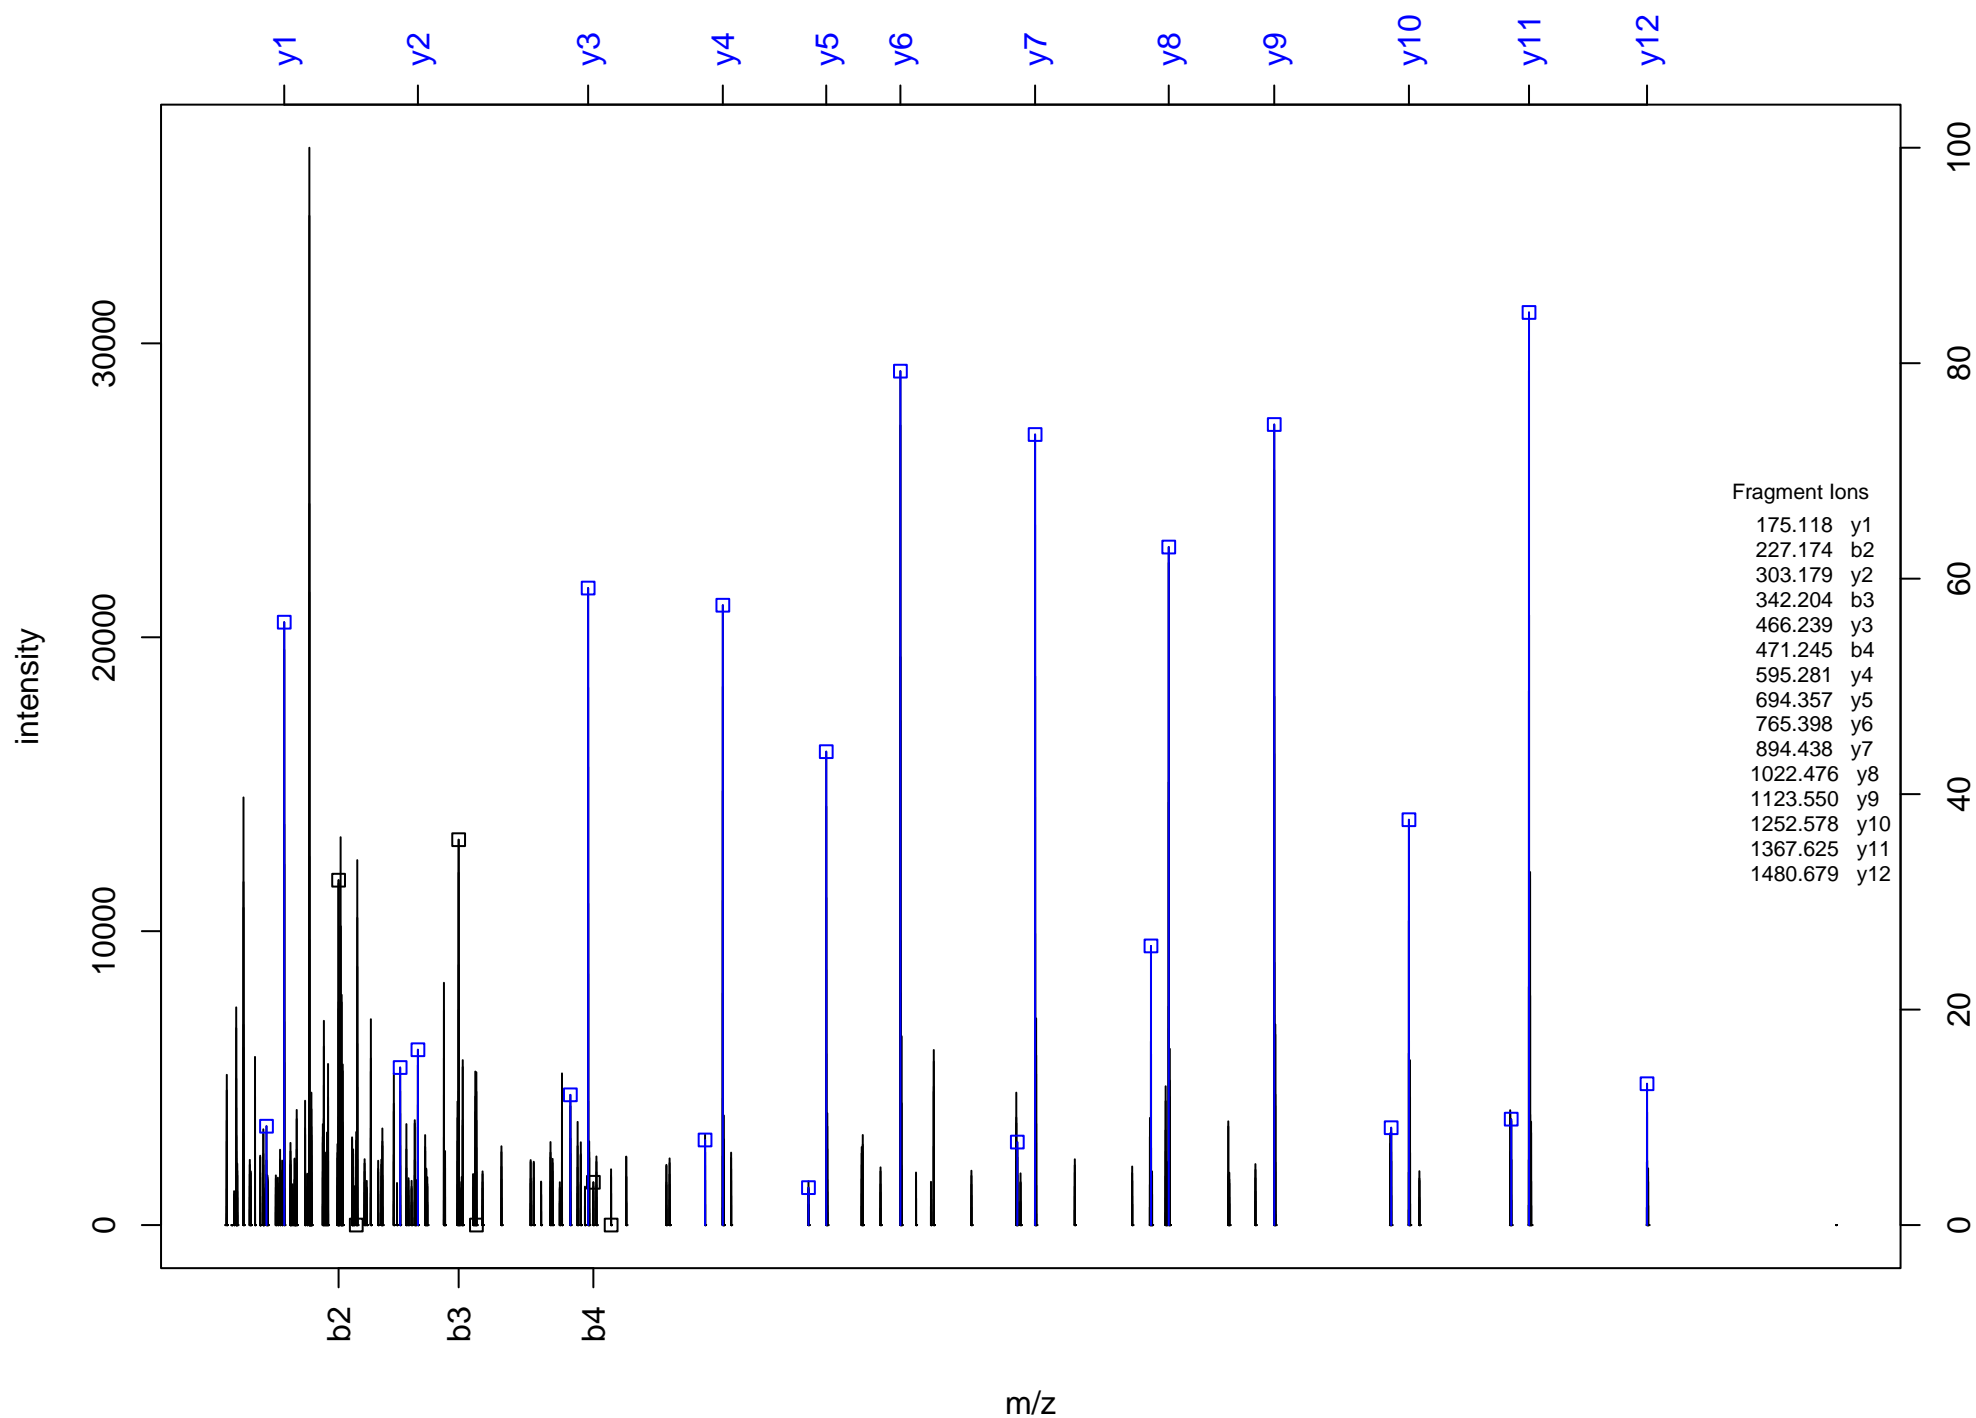

# IAPGAVVCVESEIR

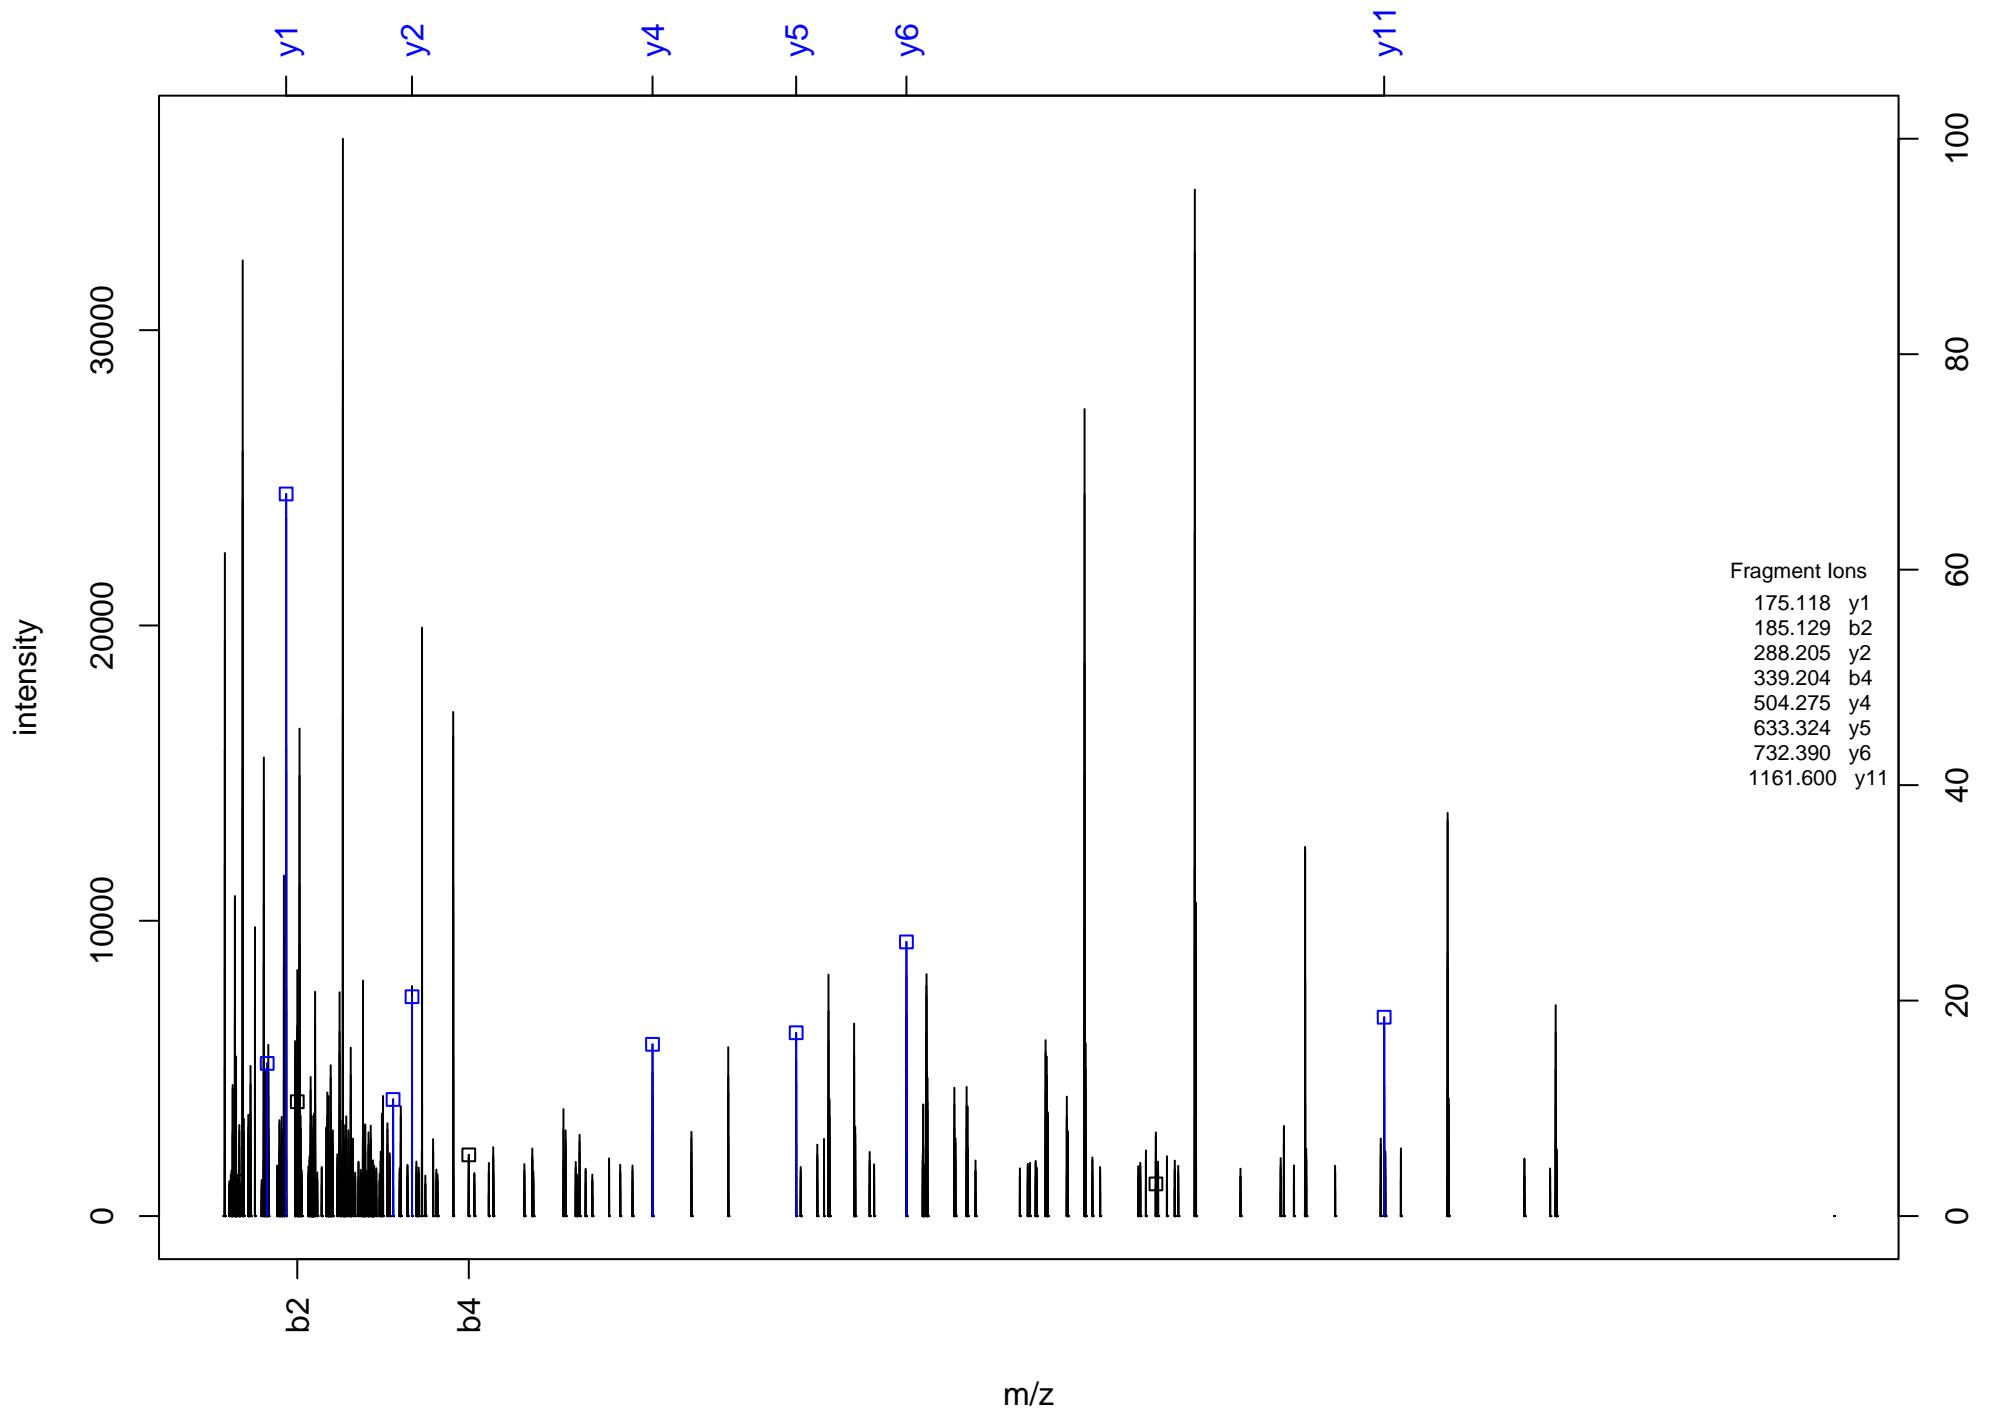

# LTEELHTENEN^KK

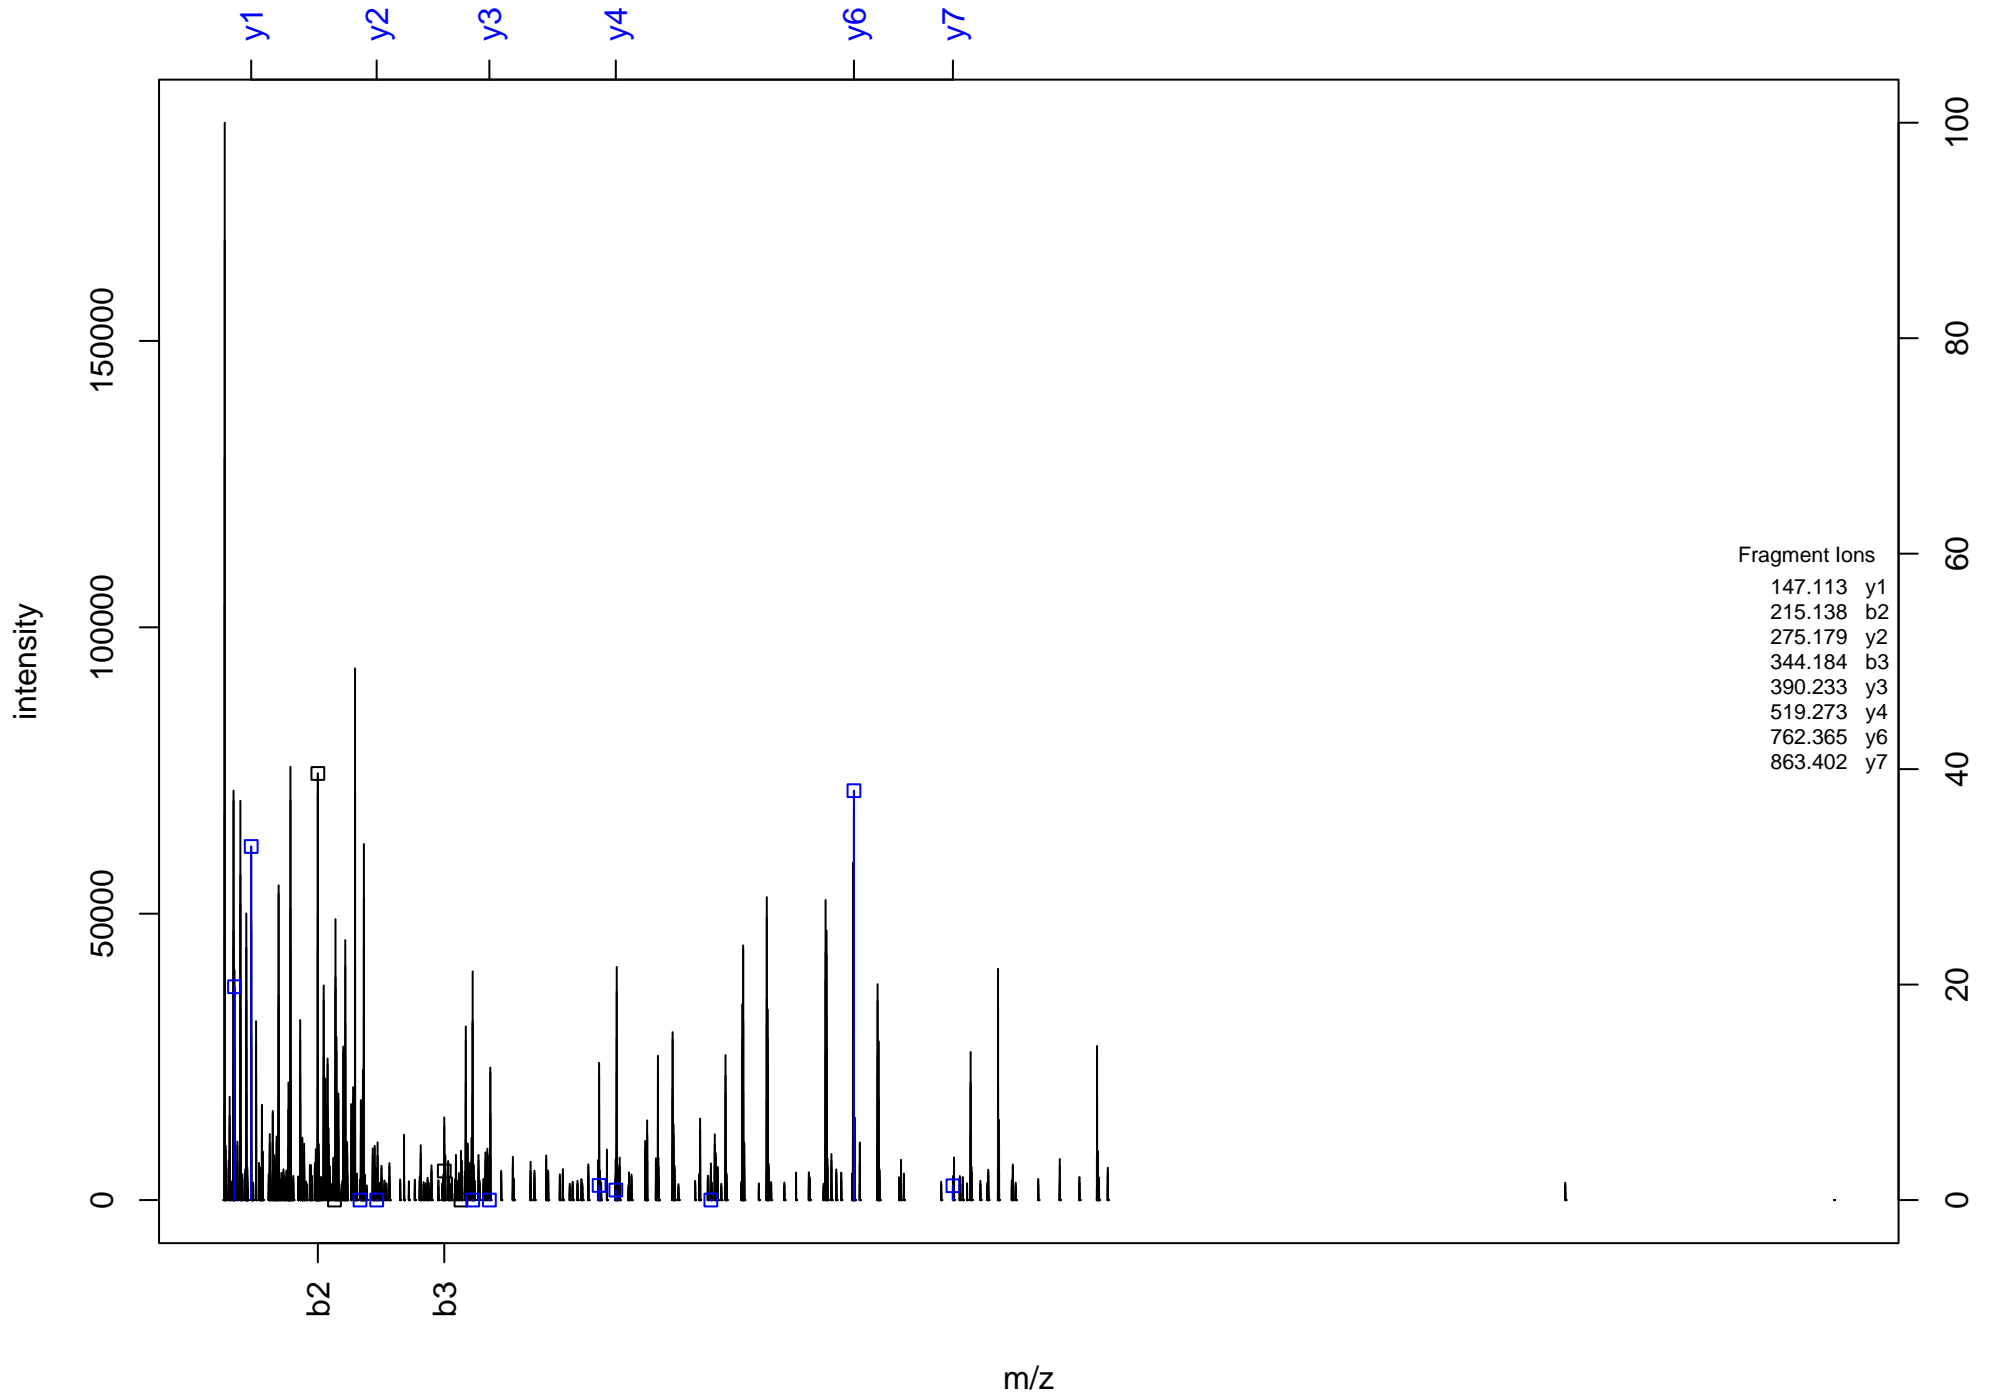

# EAEILEVLR

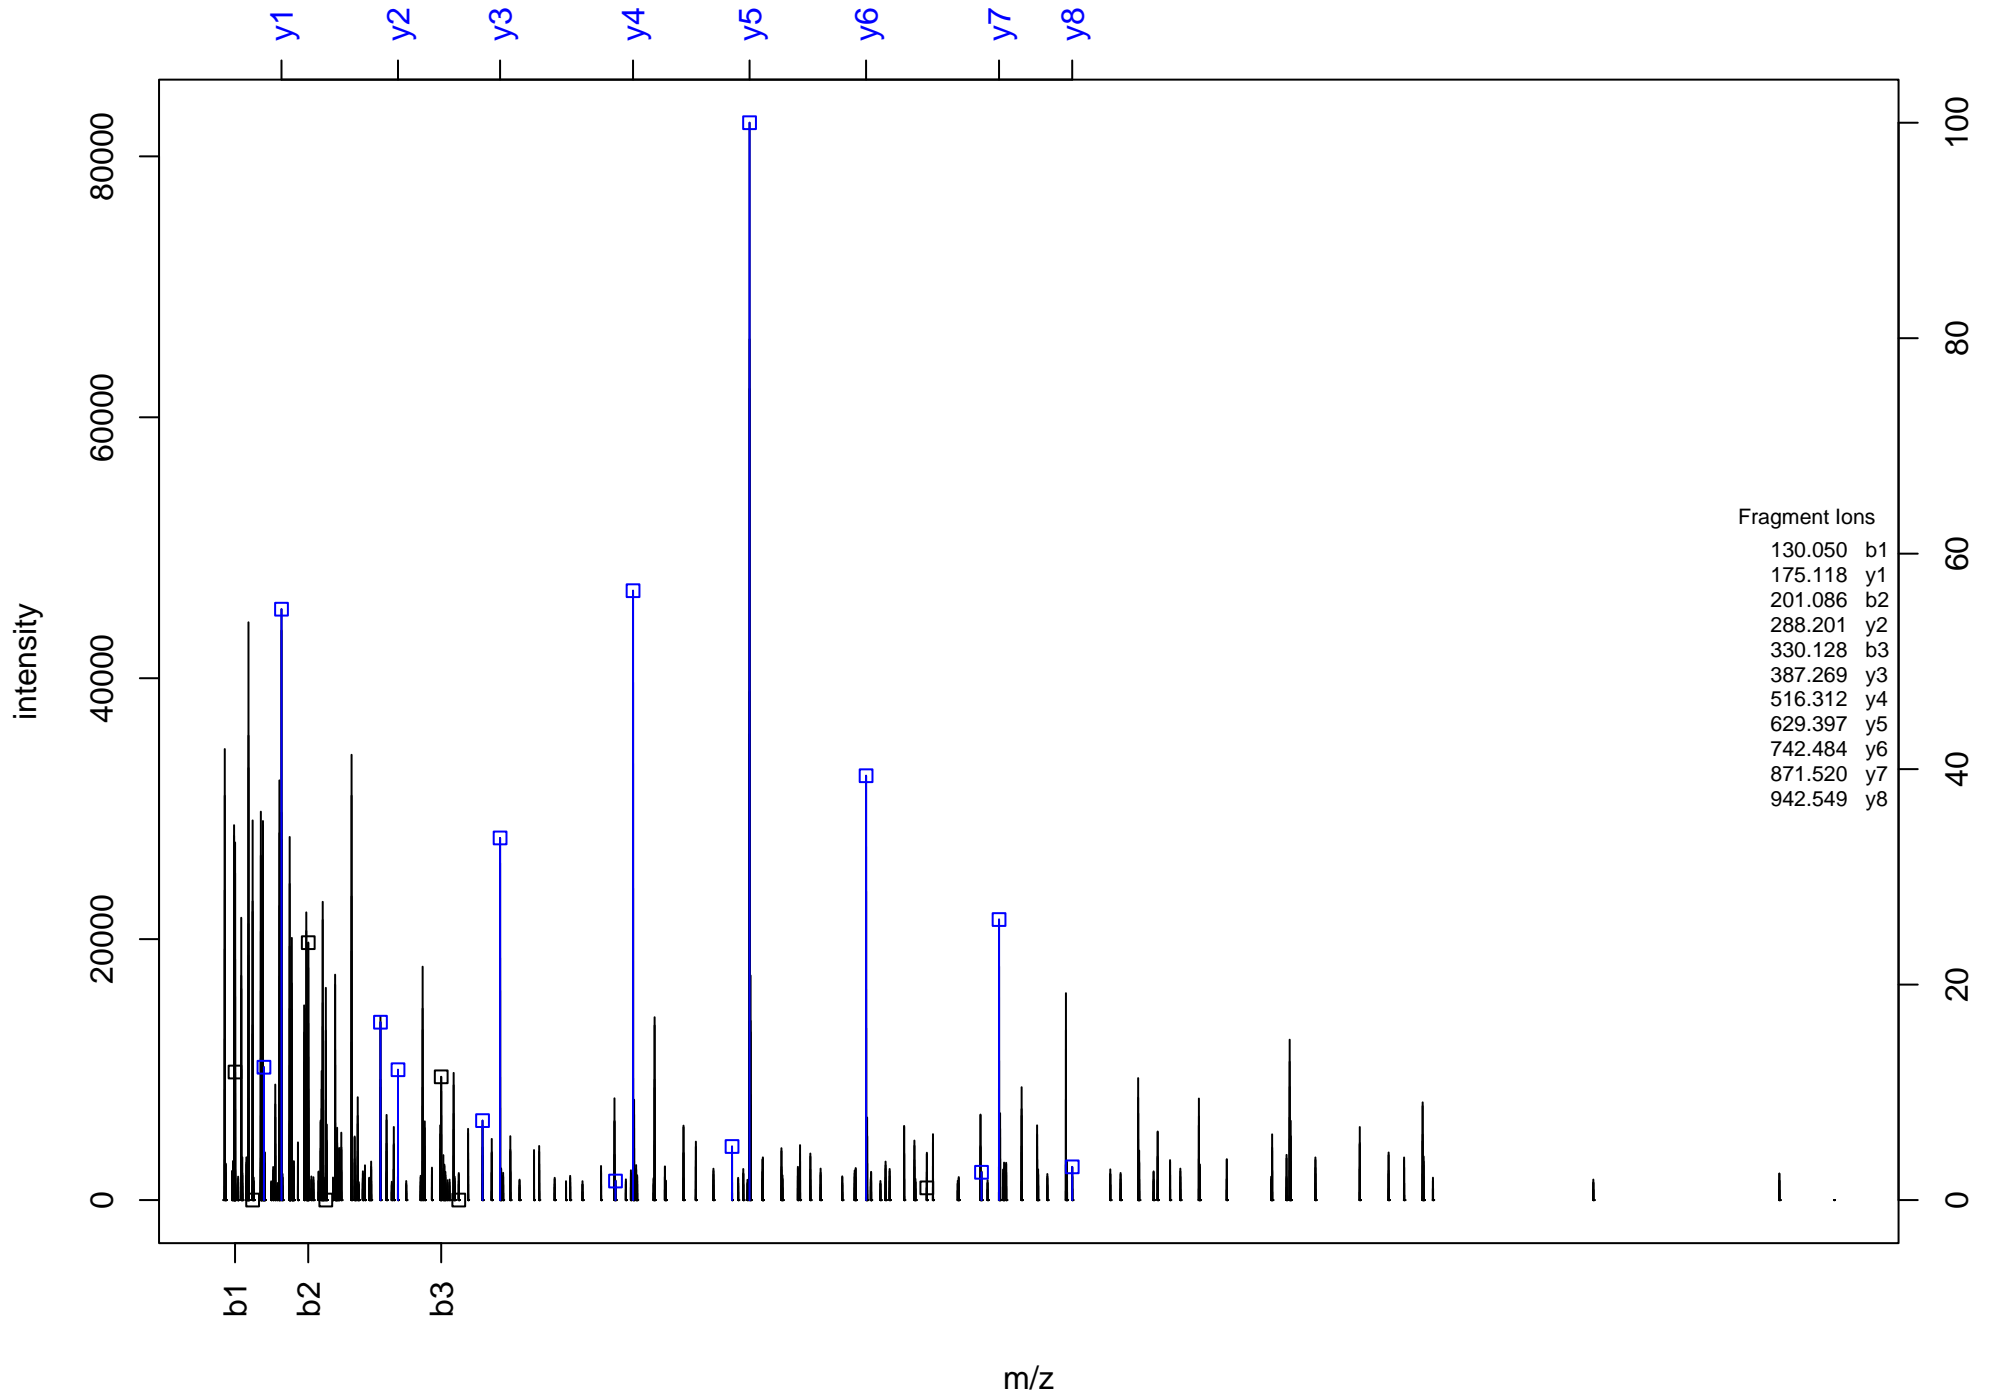



# LQELGLLPLLTDDEGSARPT

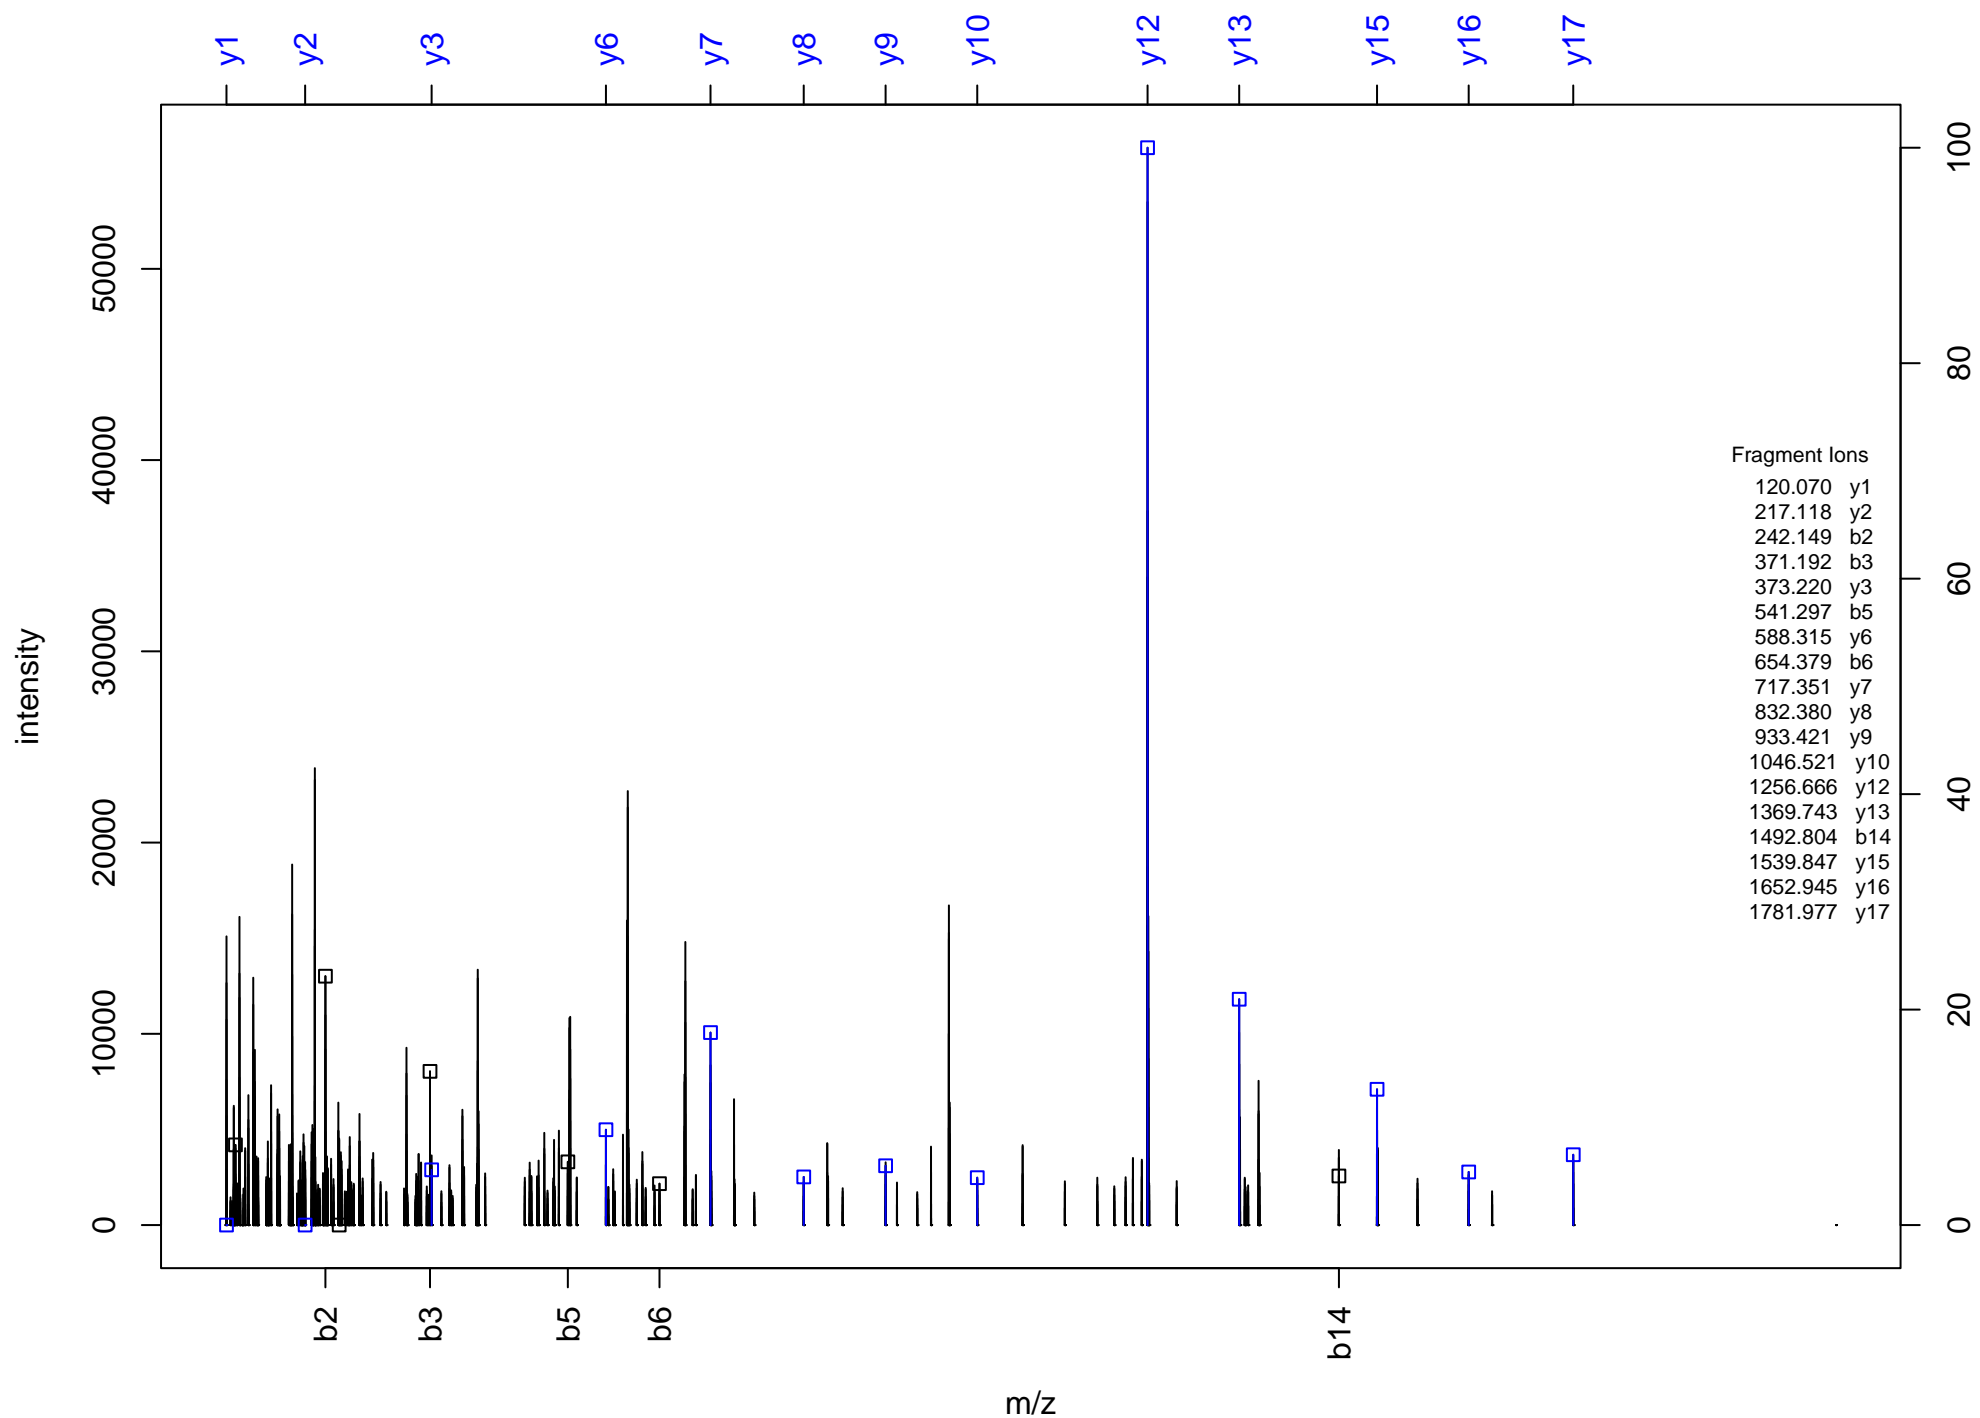

# TVLLEALGSPSEDVR

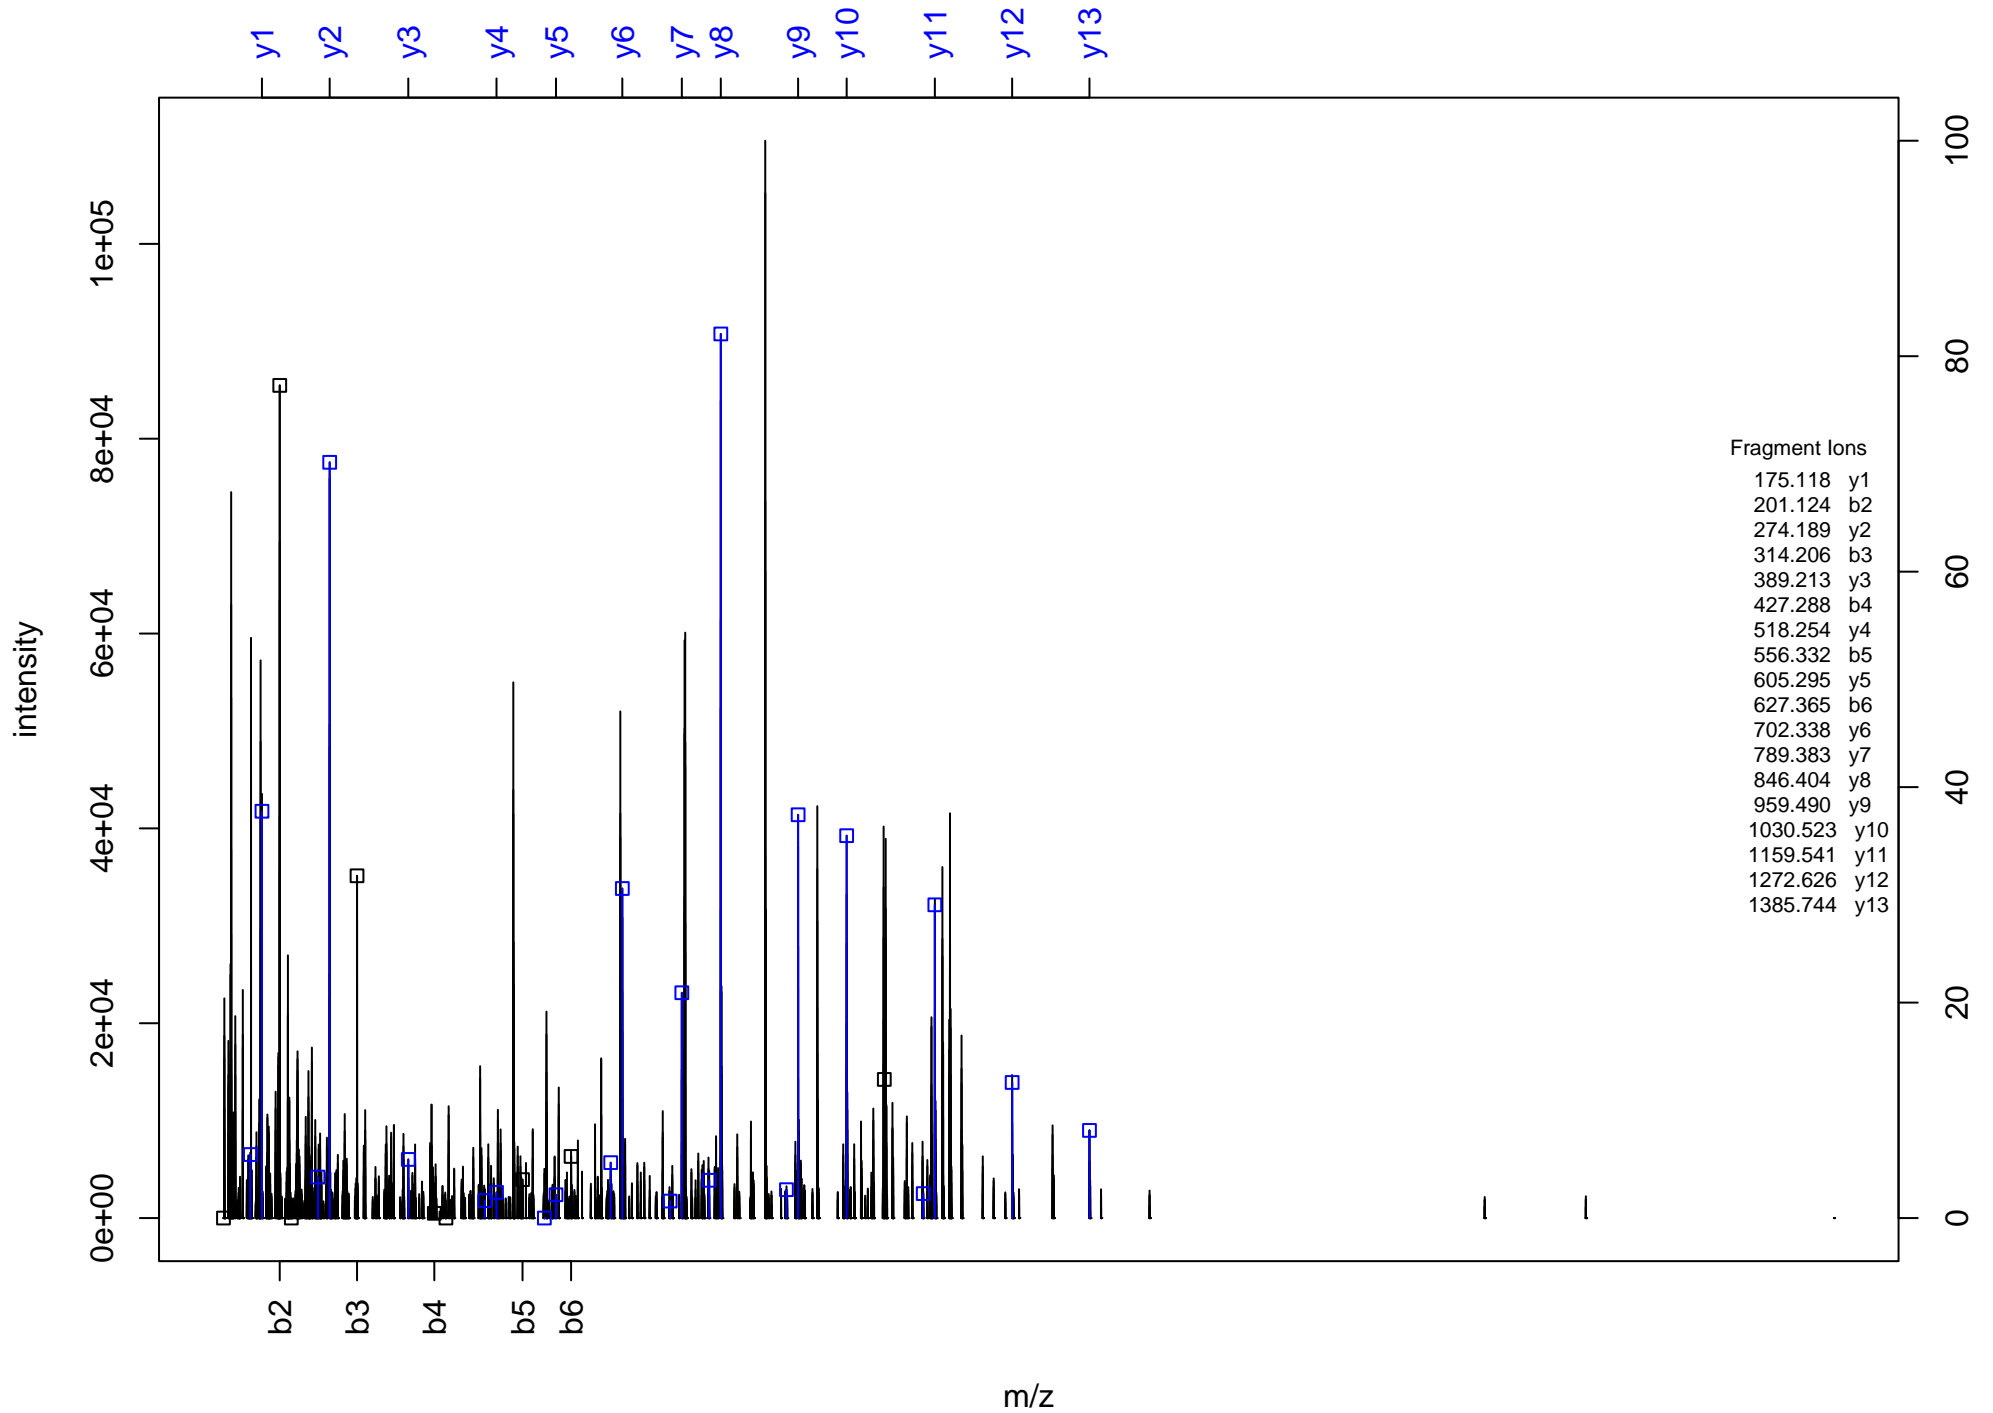

# VNLQNNPGAMEHFHMK

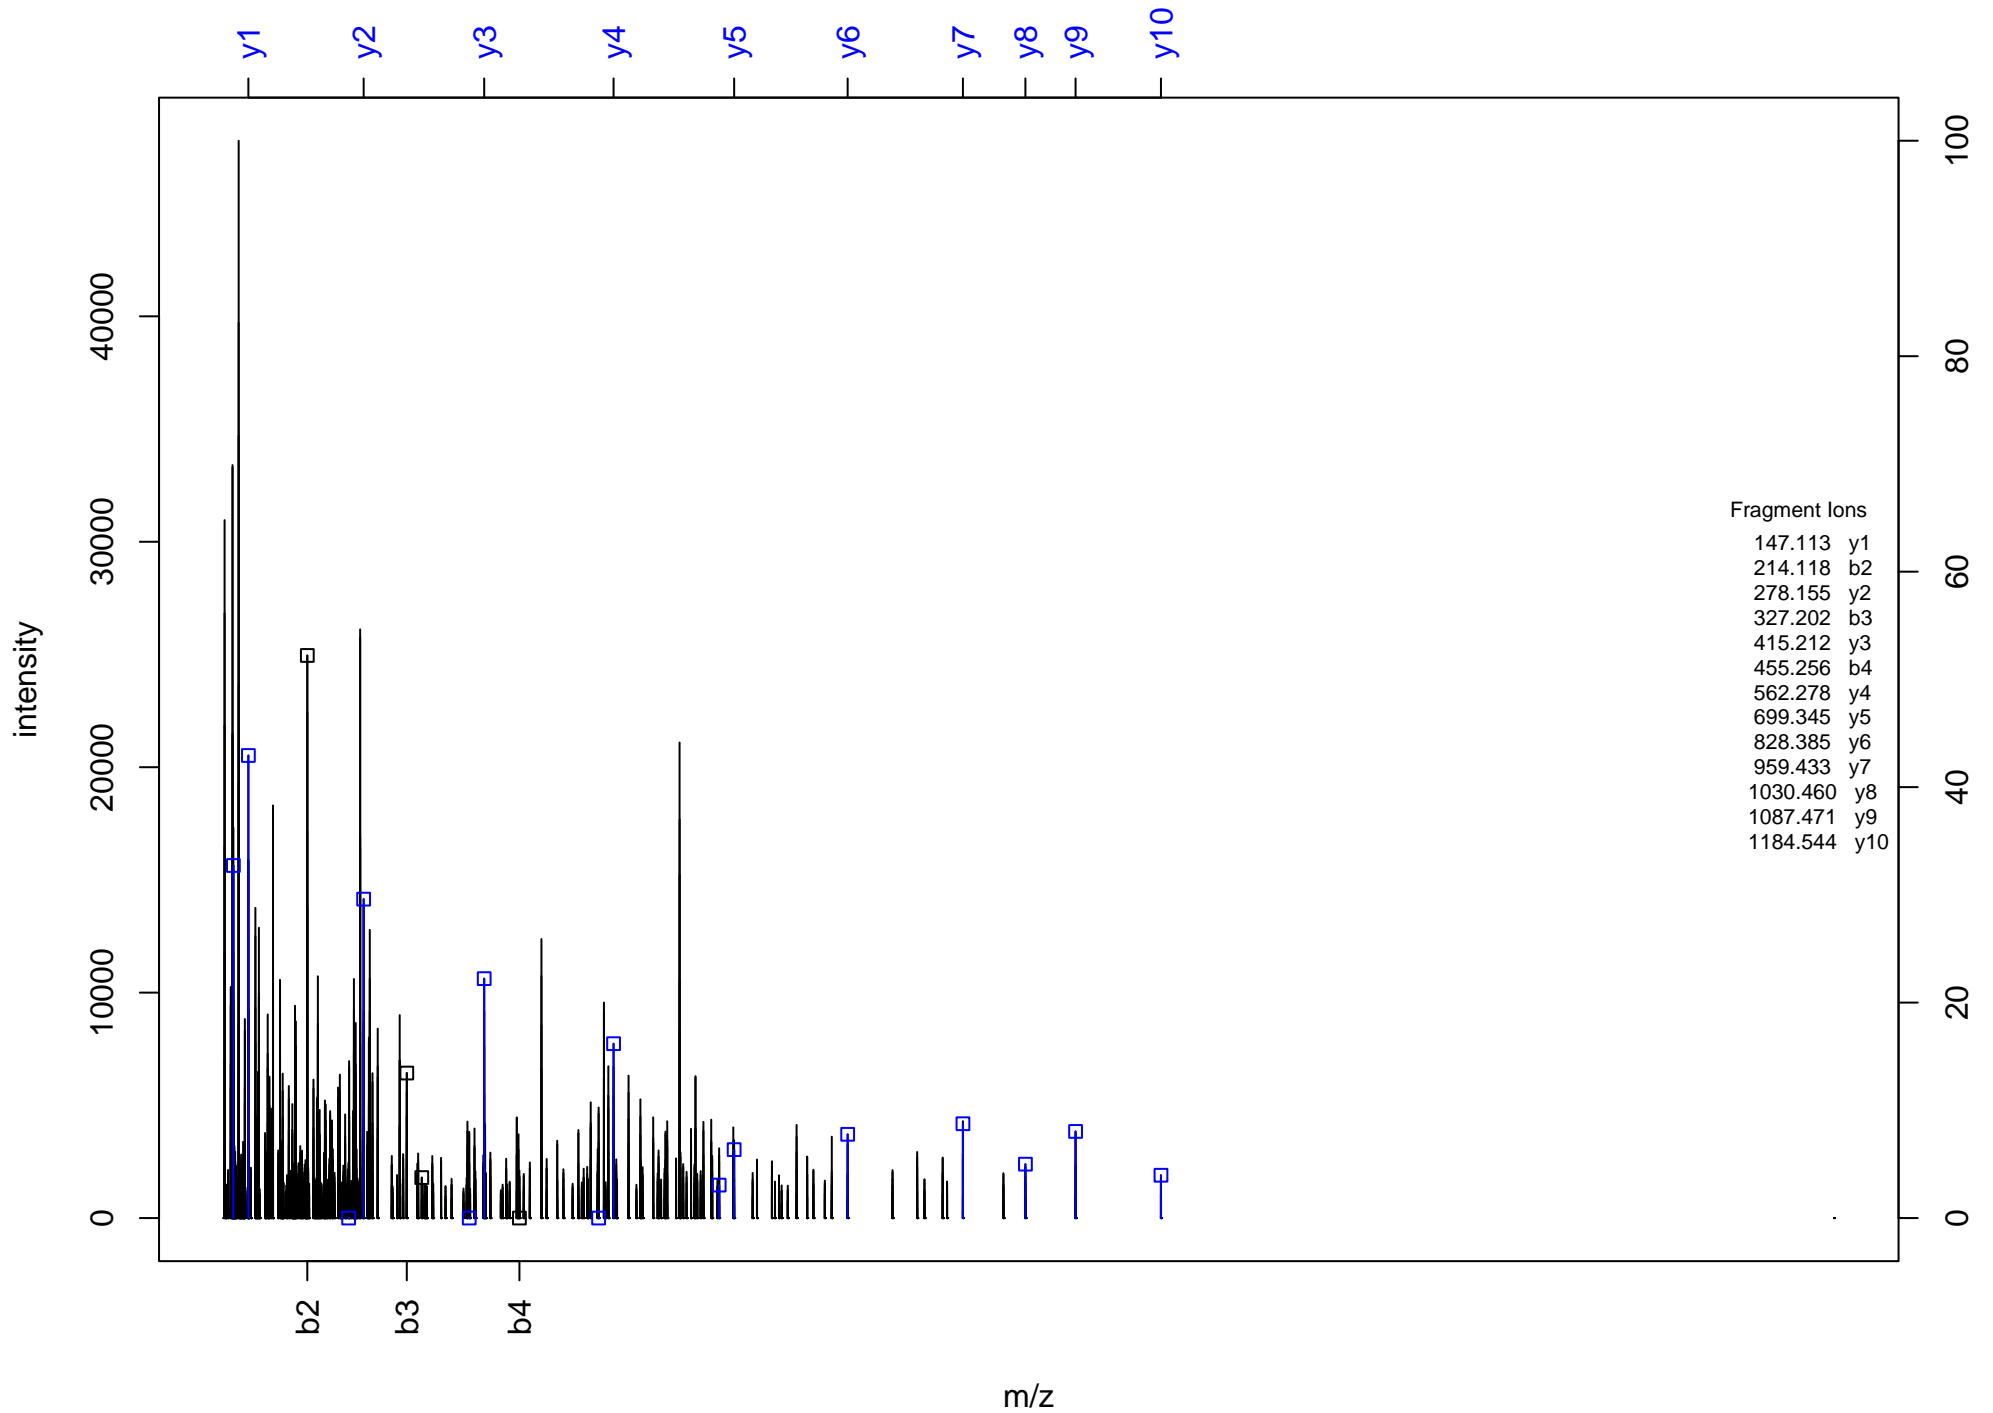

# DPEIAELFFK

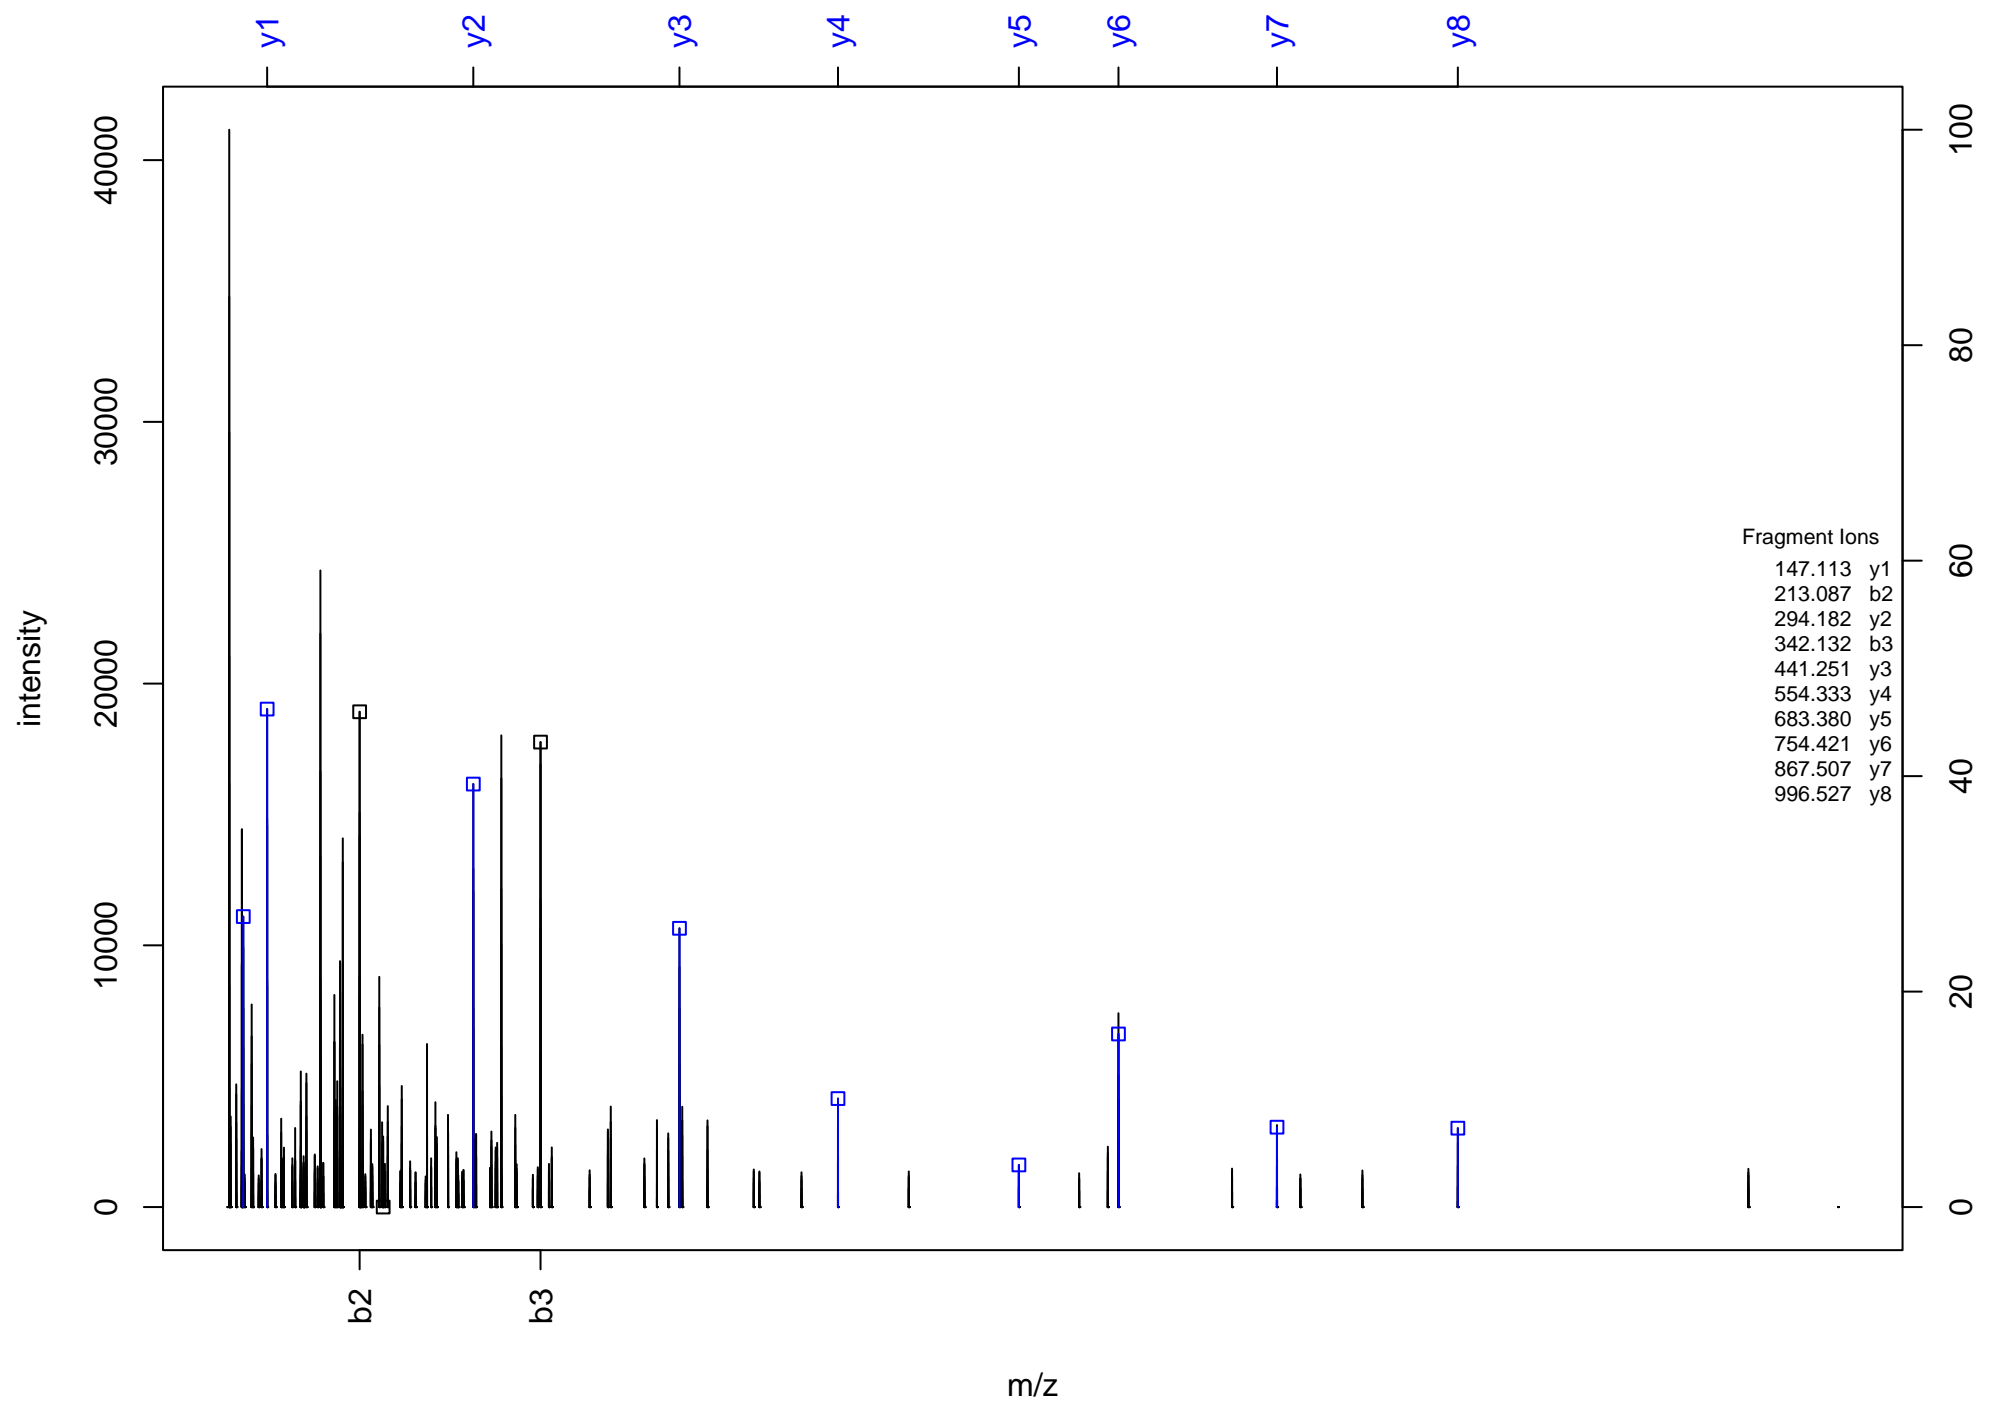

# VESTTTTPDGPCVVSQETEK

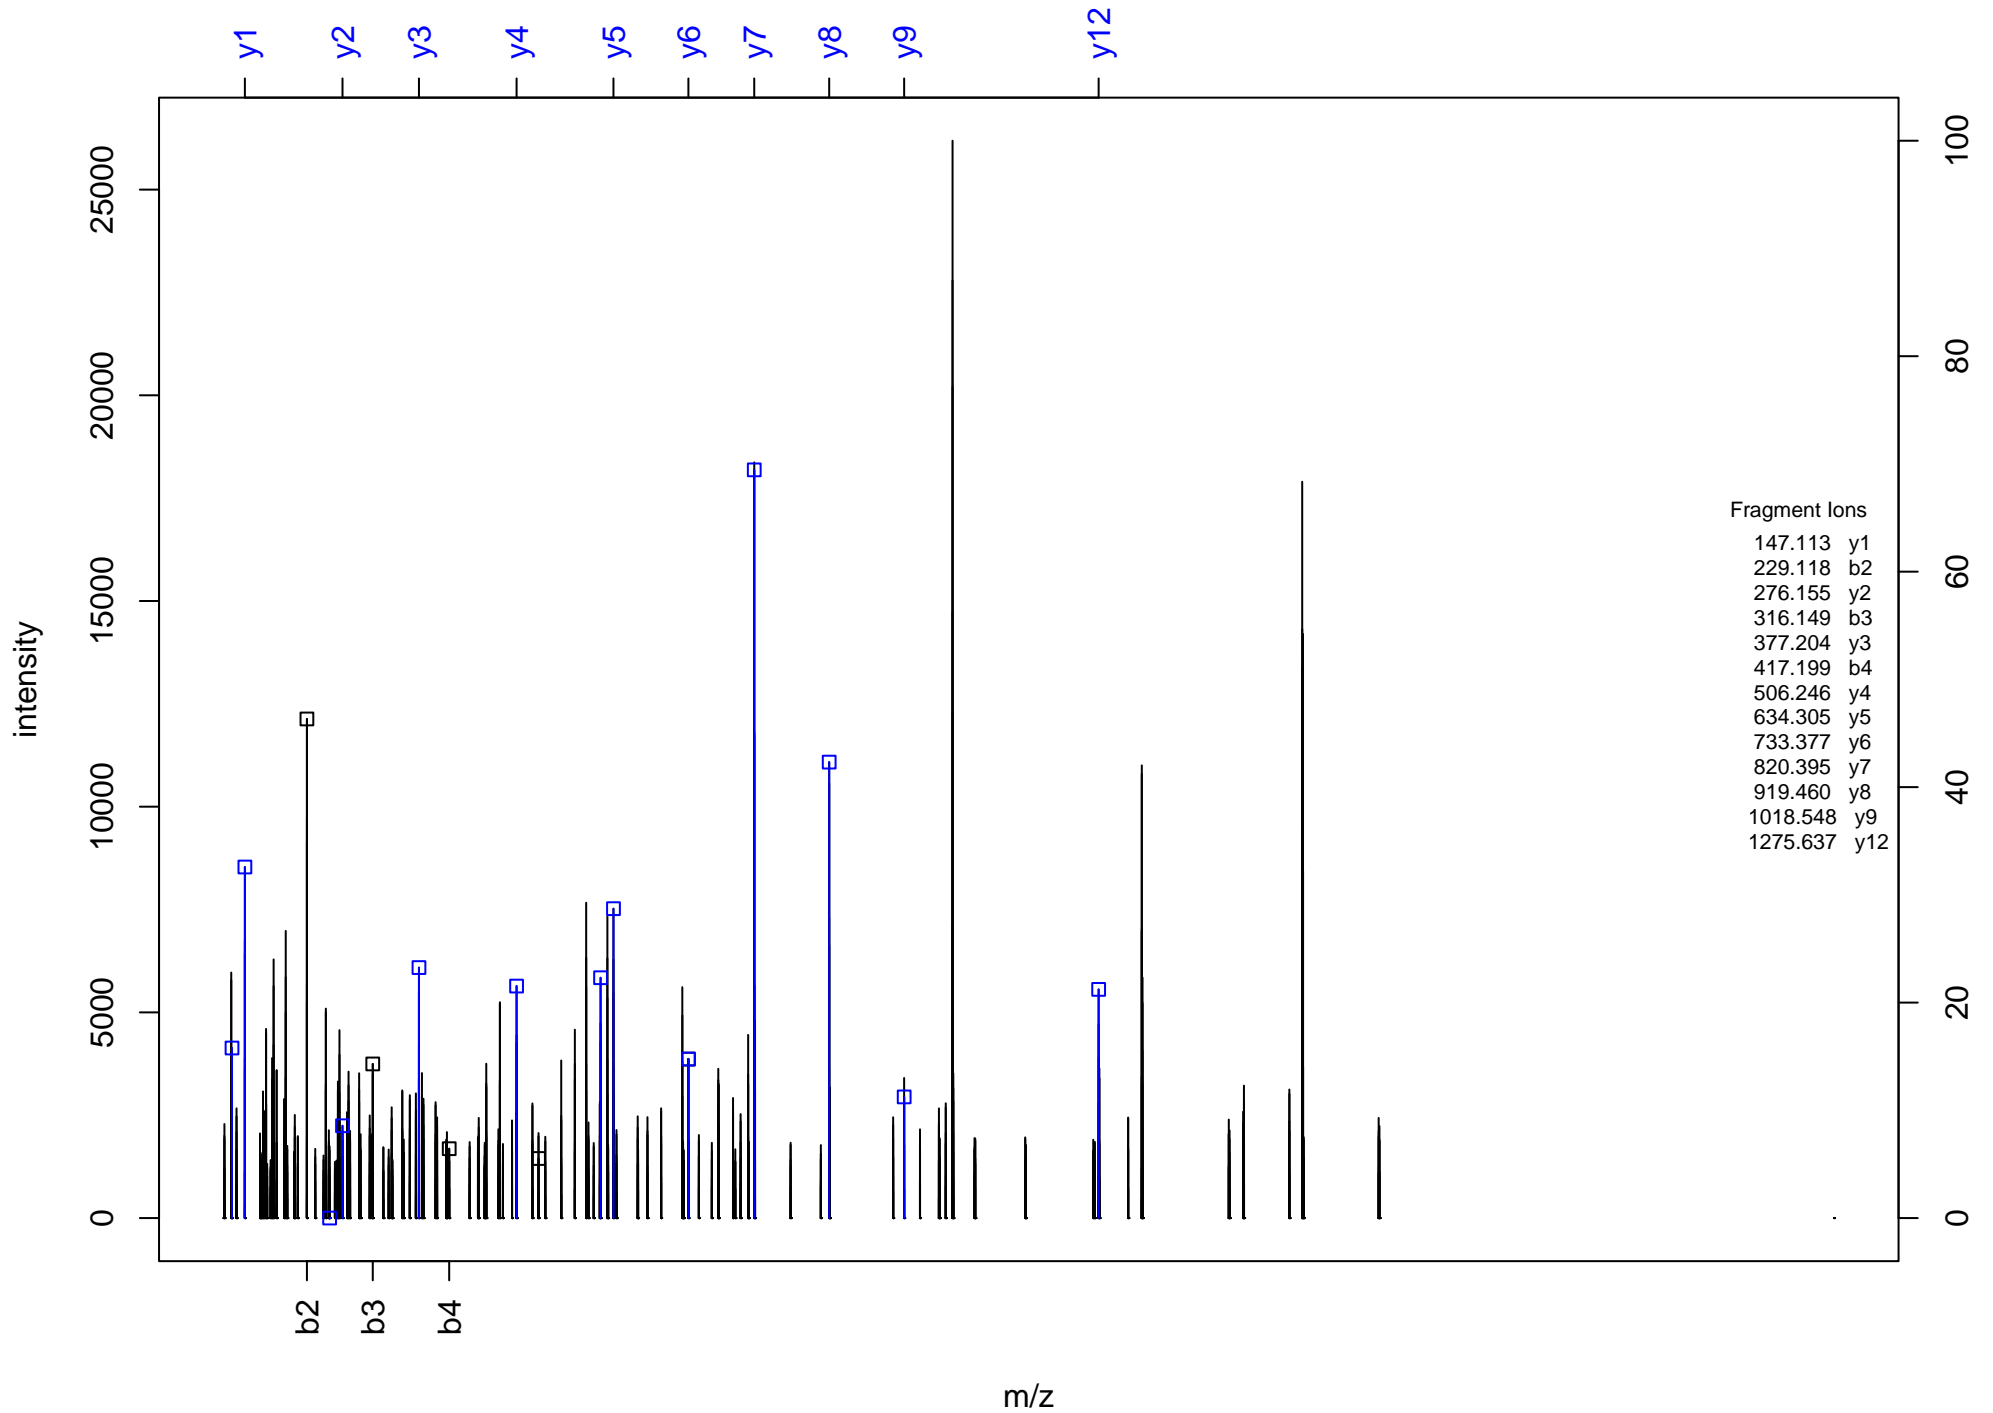

# (Ac)MSRAGN^RGN^TQAR

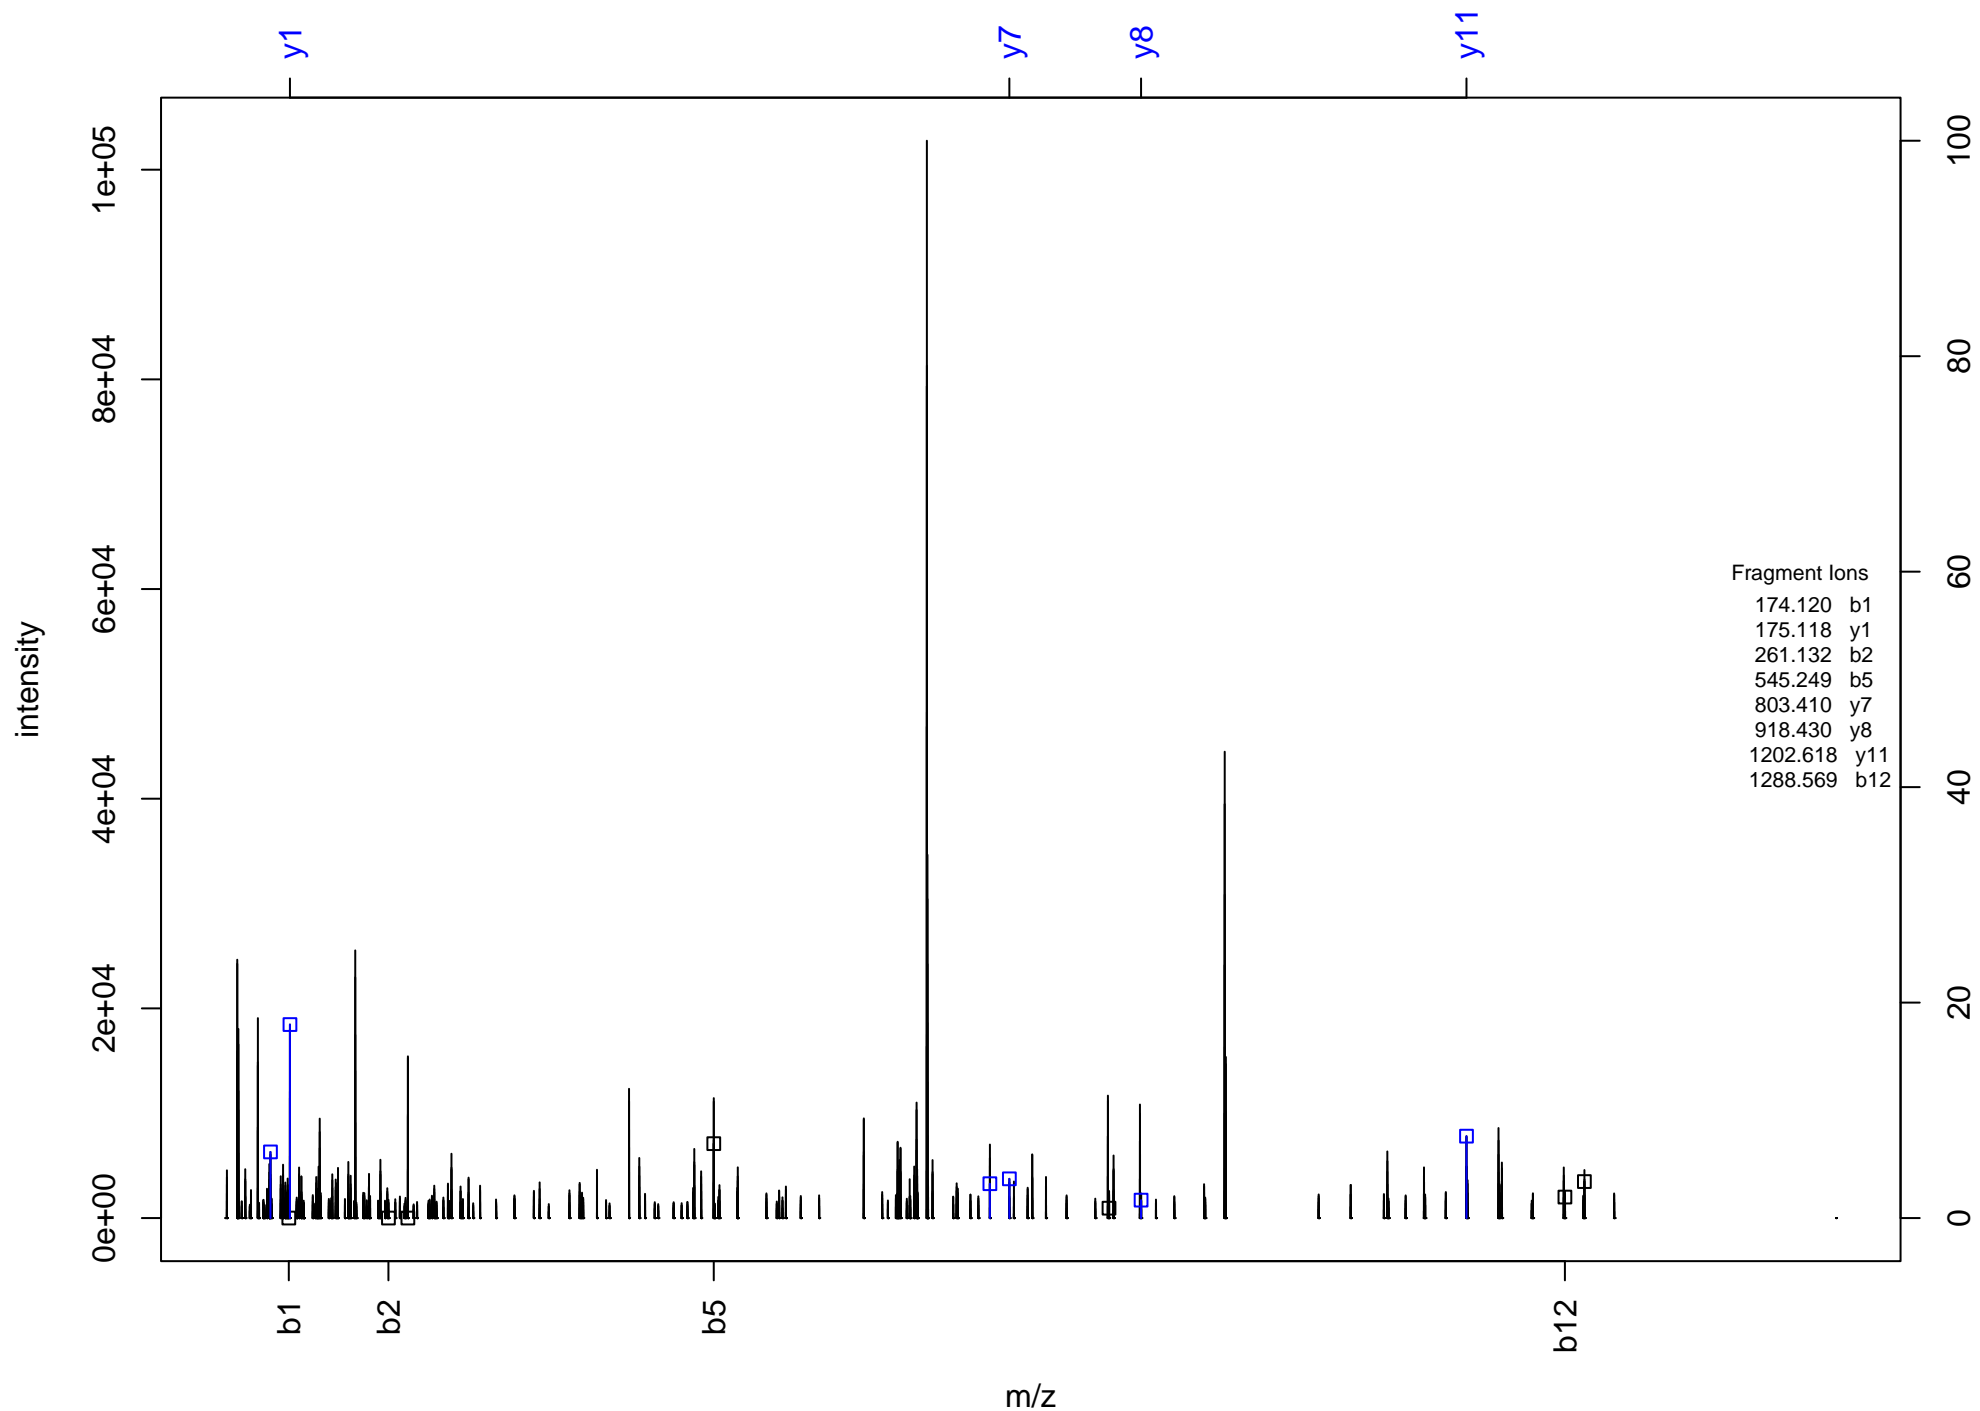

# VQTPPAVDPAEFFVLTER

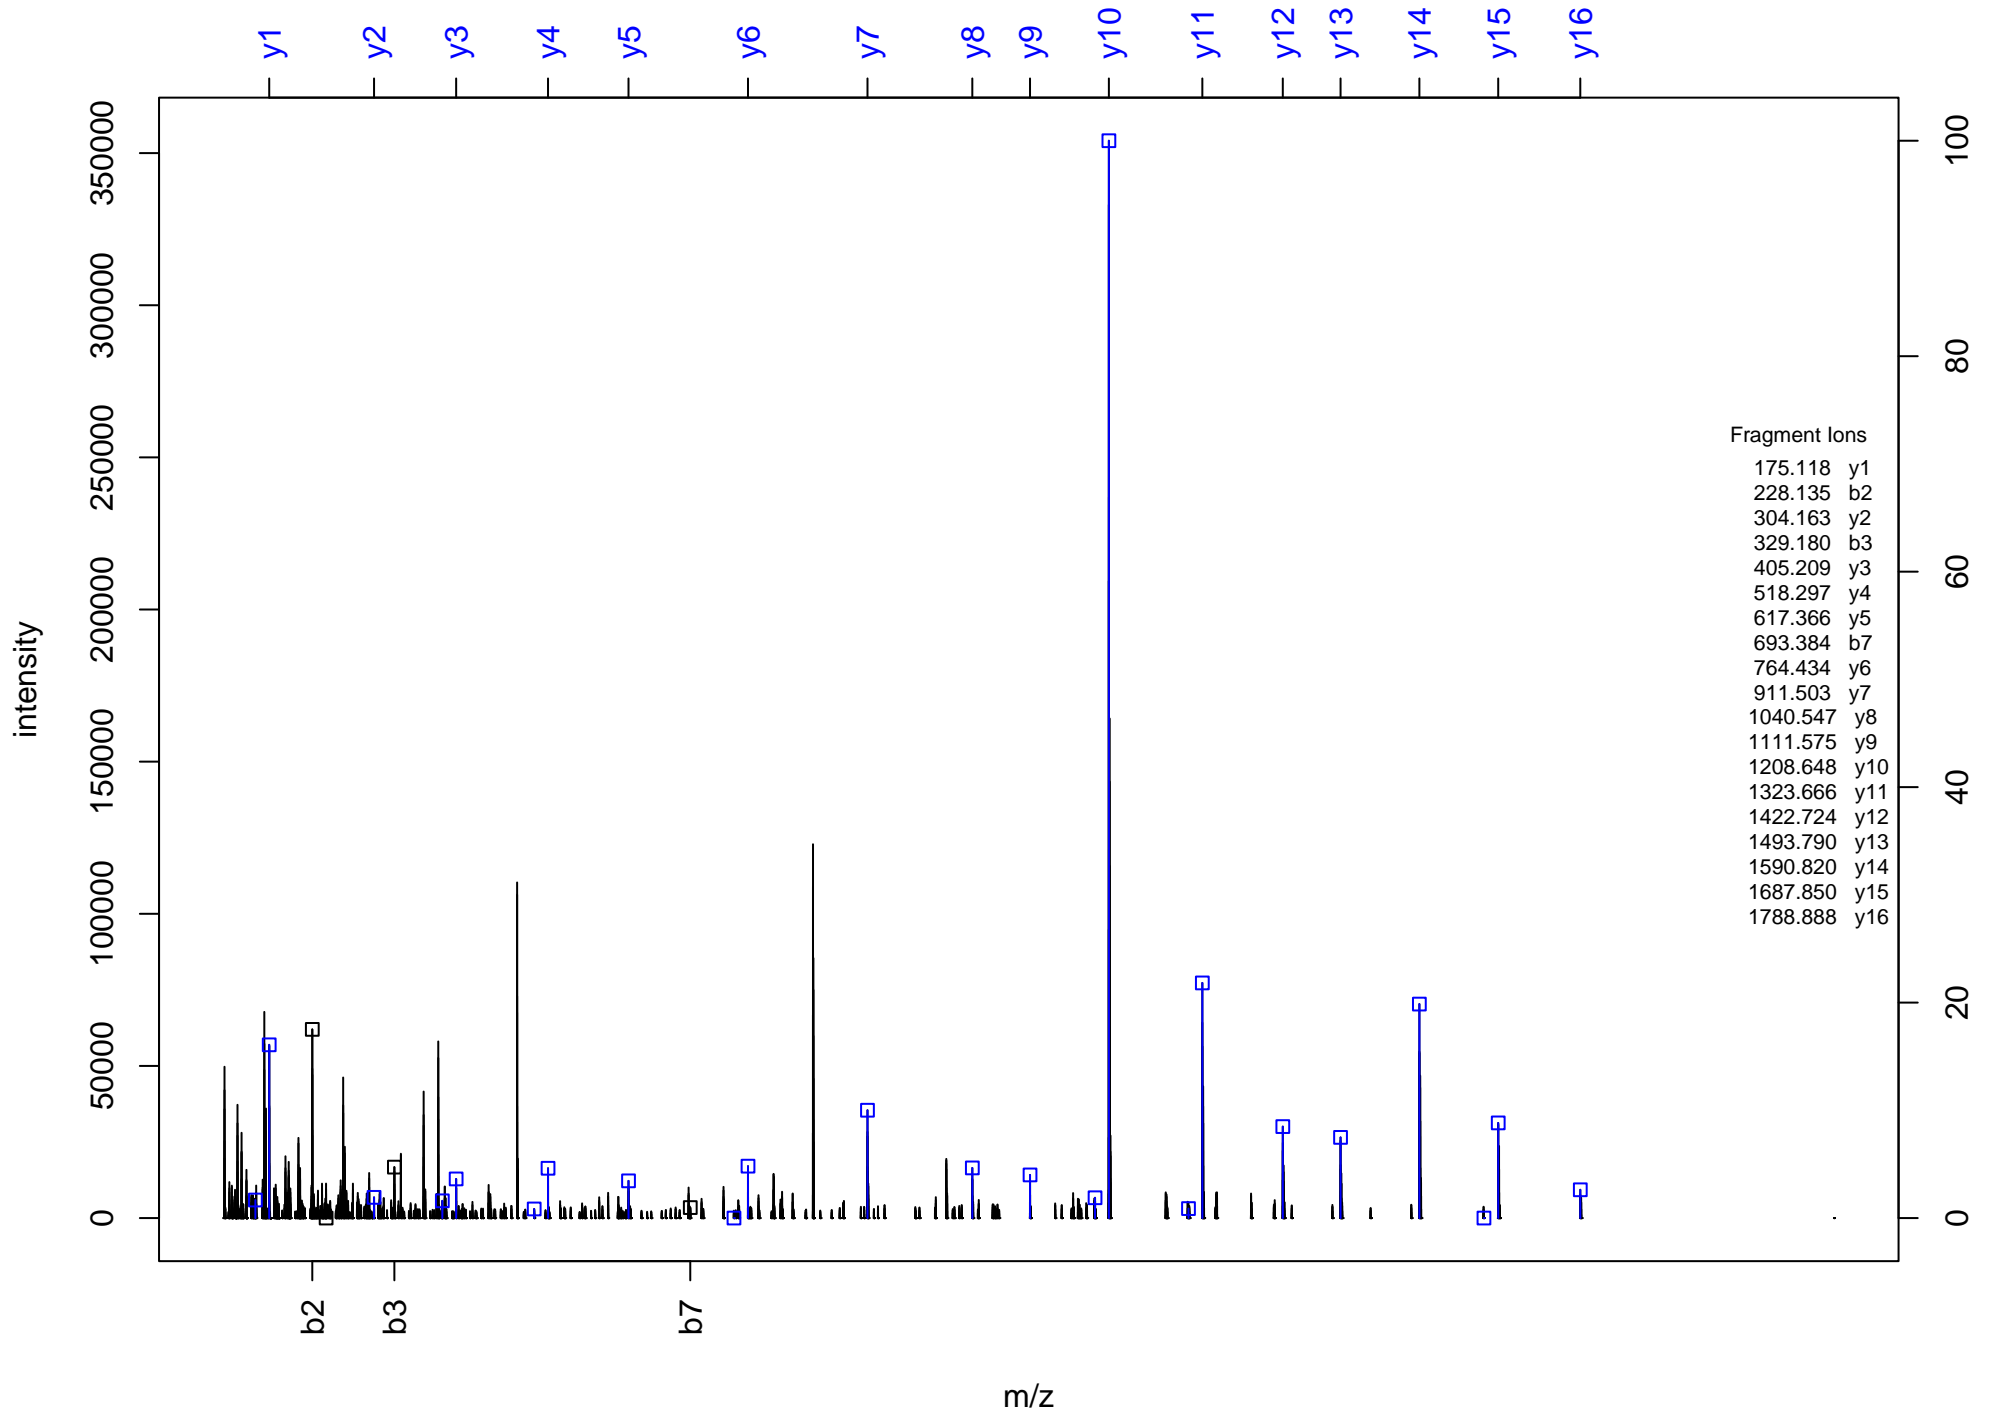

# FLCLEFGQVNDPLISR

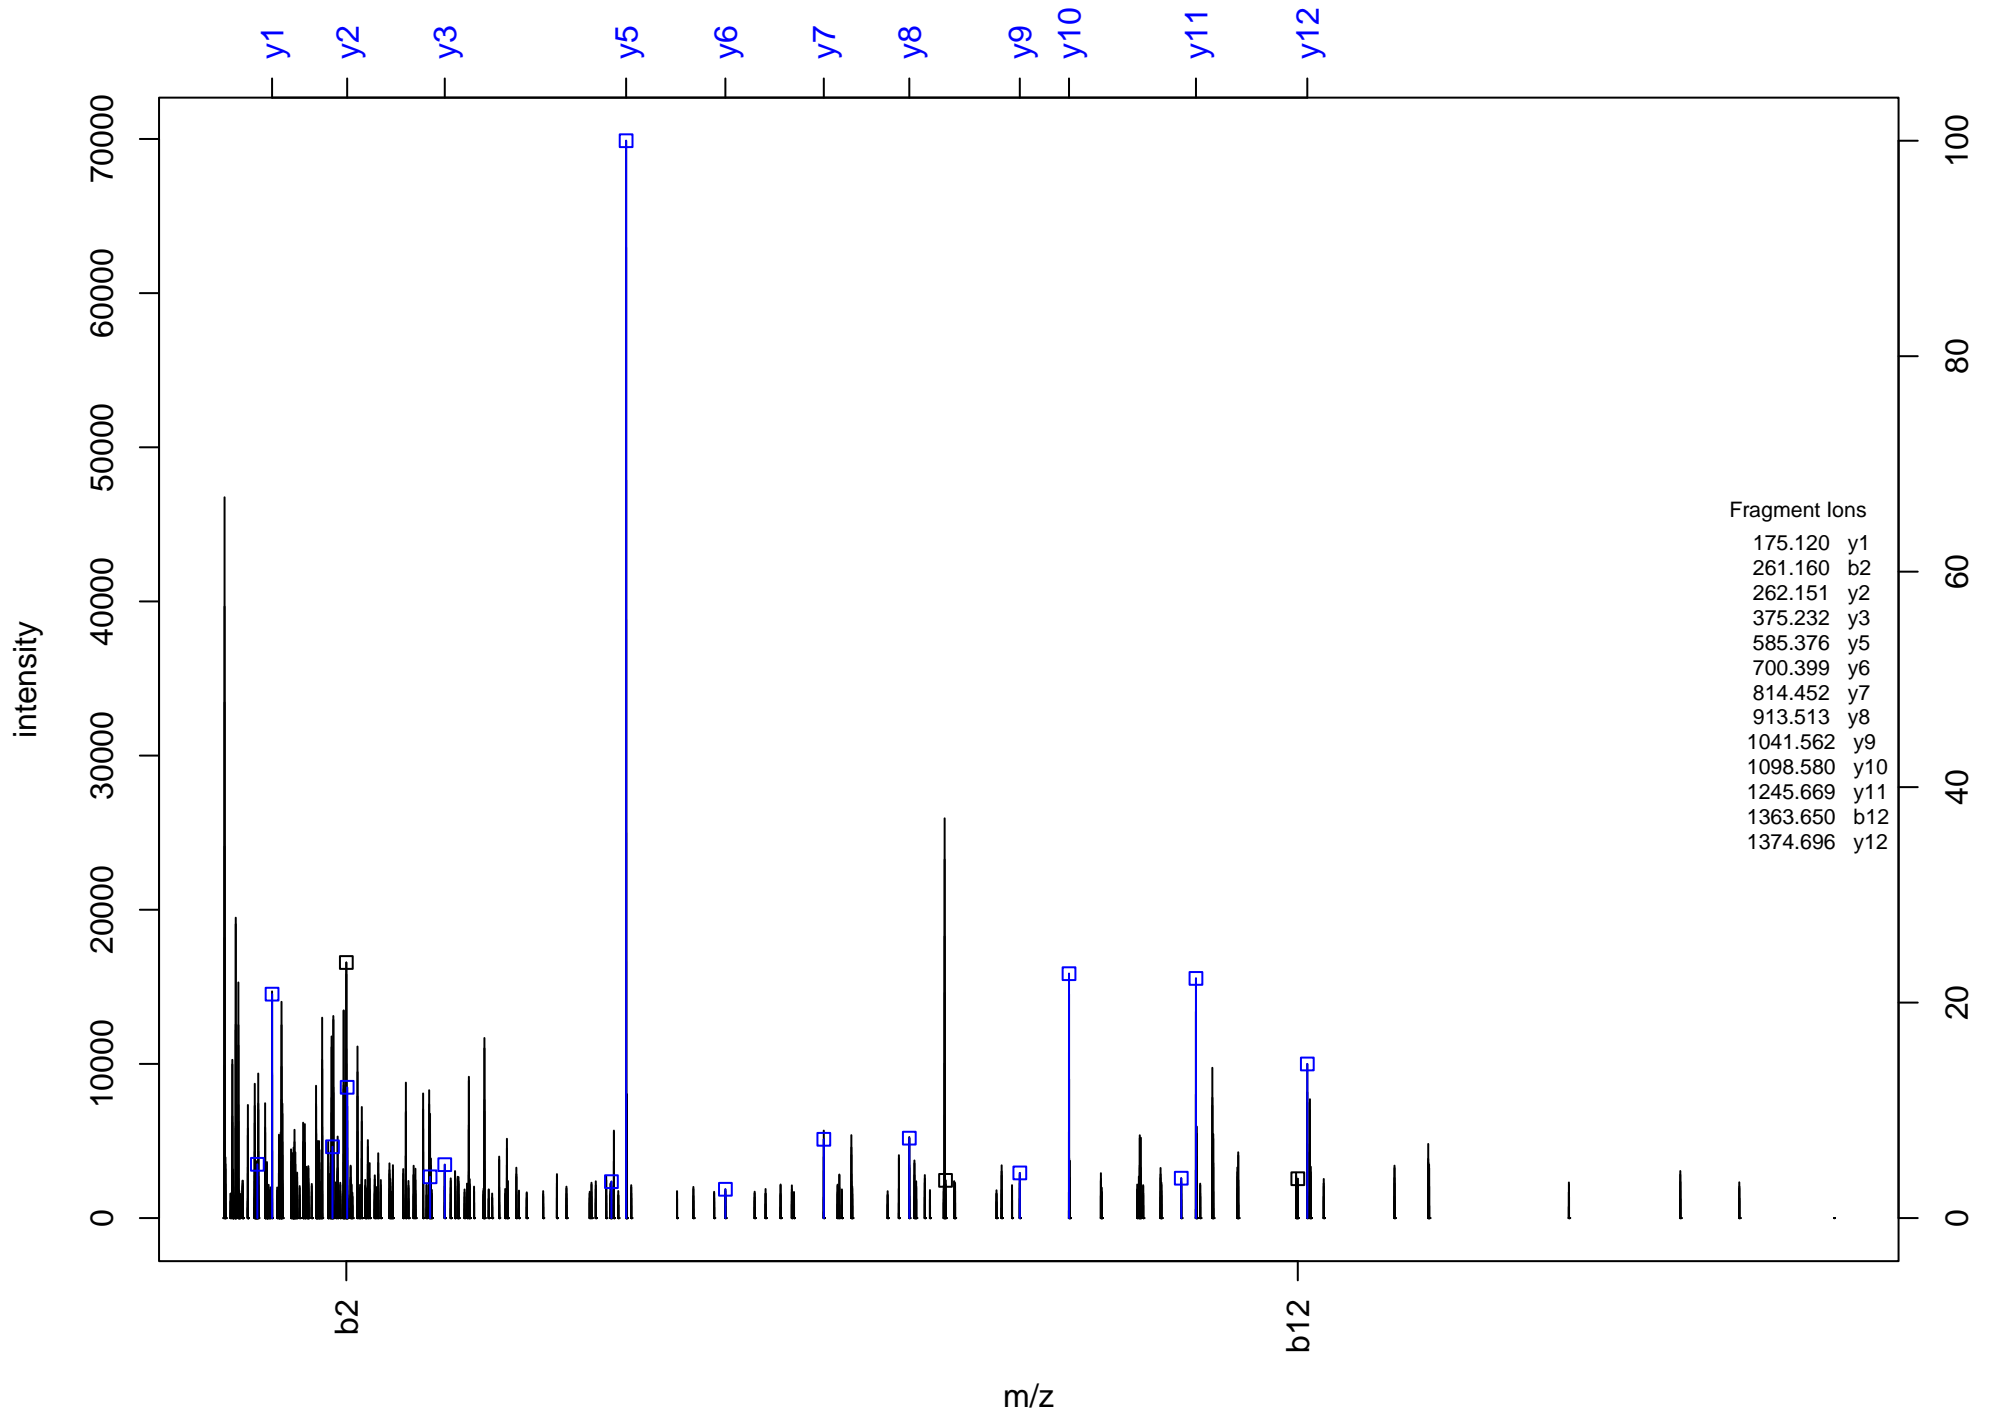



# HPPVVLVPGDLGNQLEAK

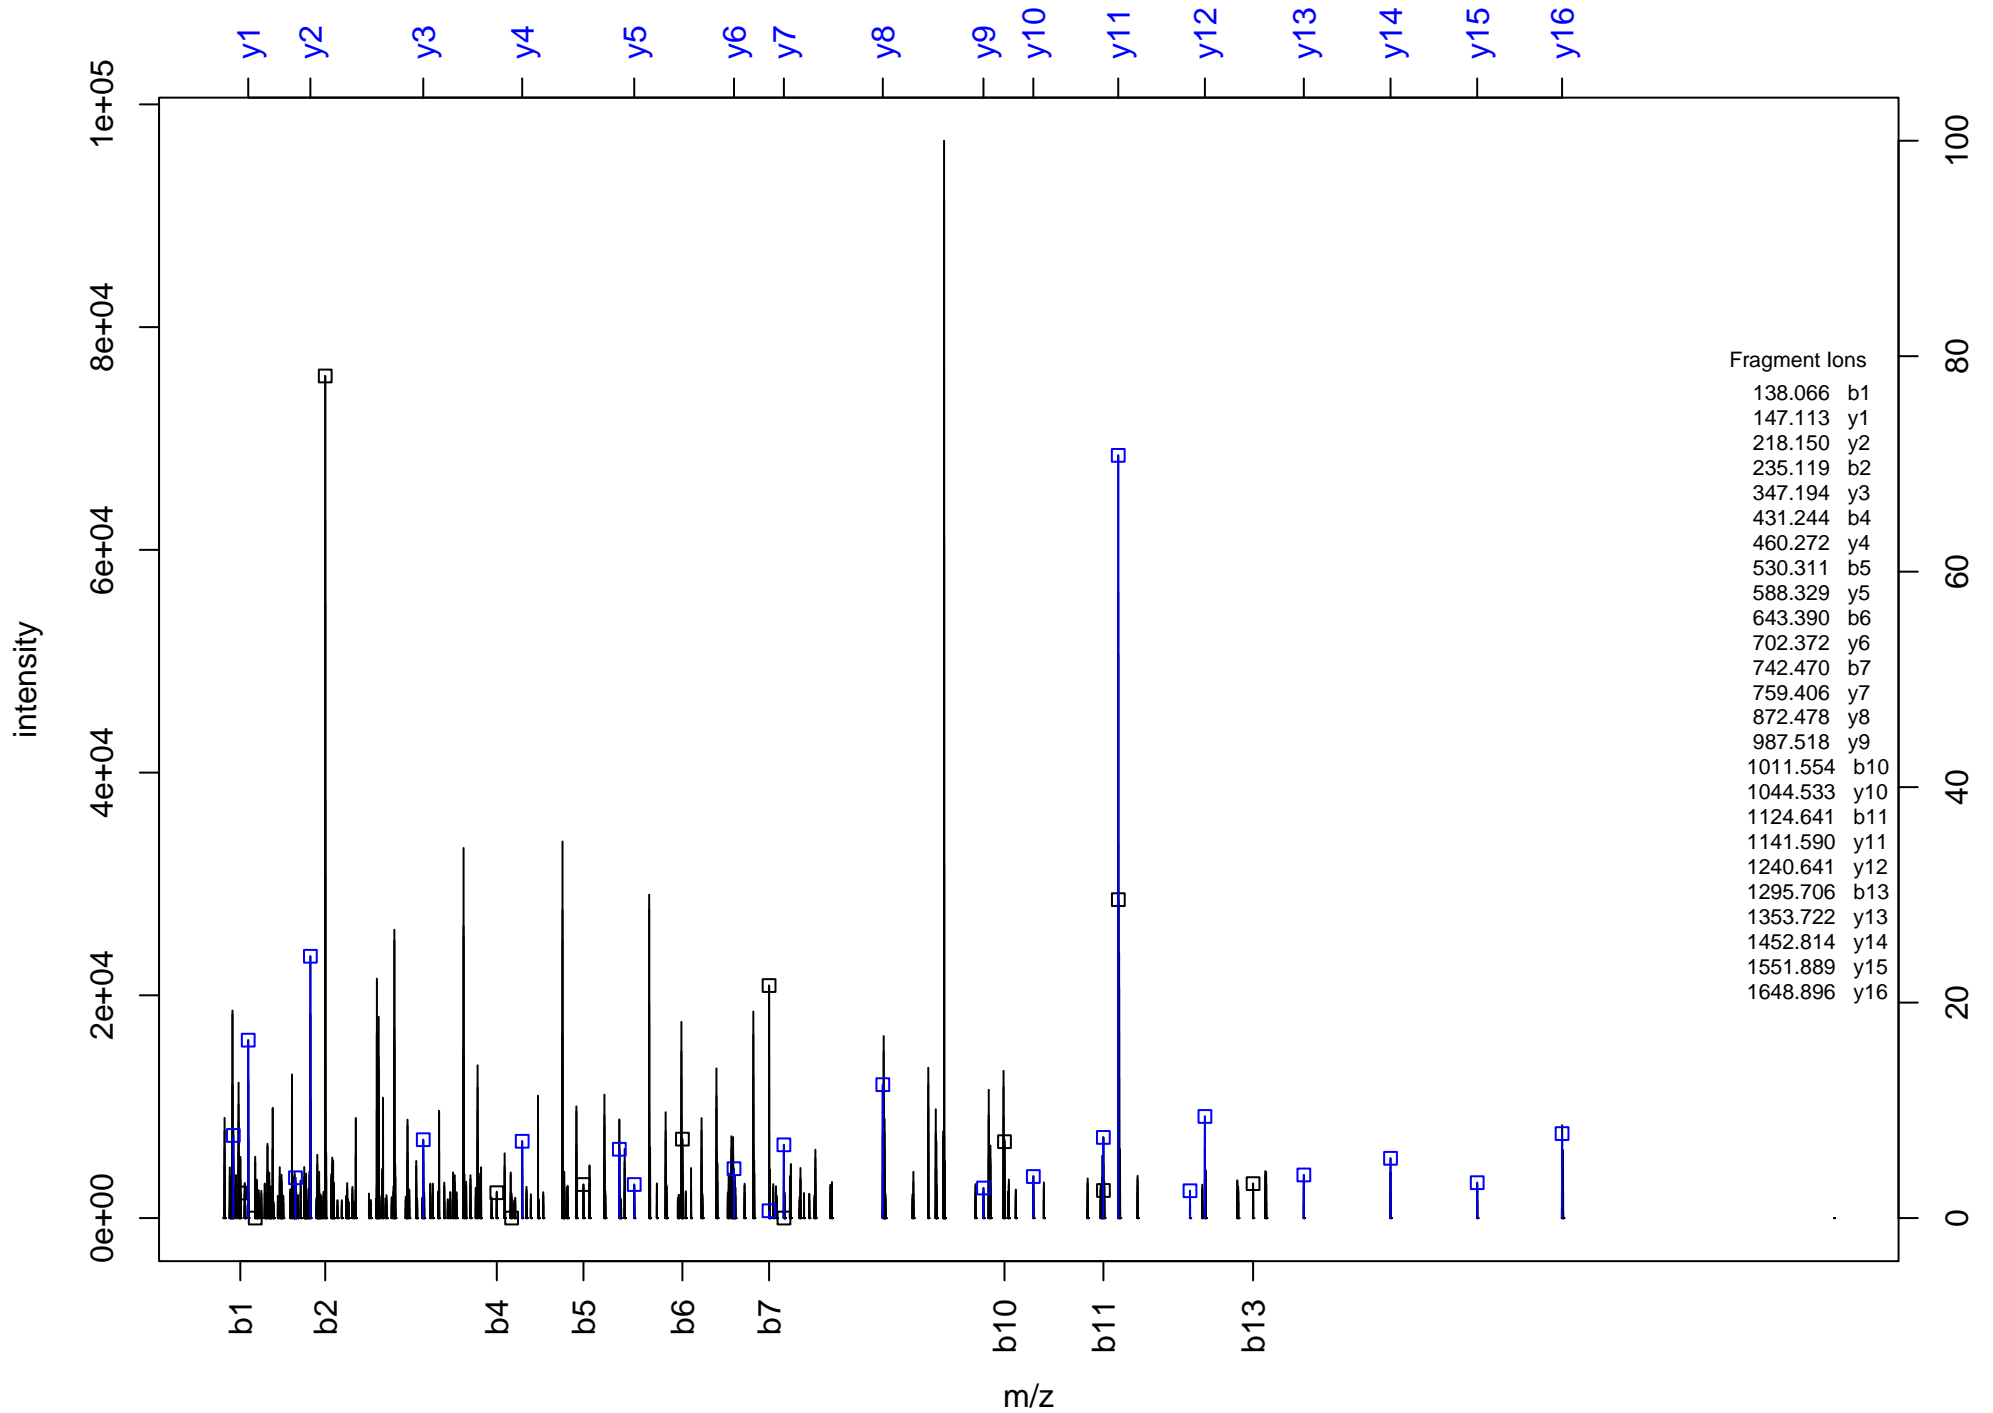

# APVSALPLAPNNLGGGPIILGAESR

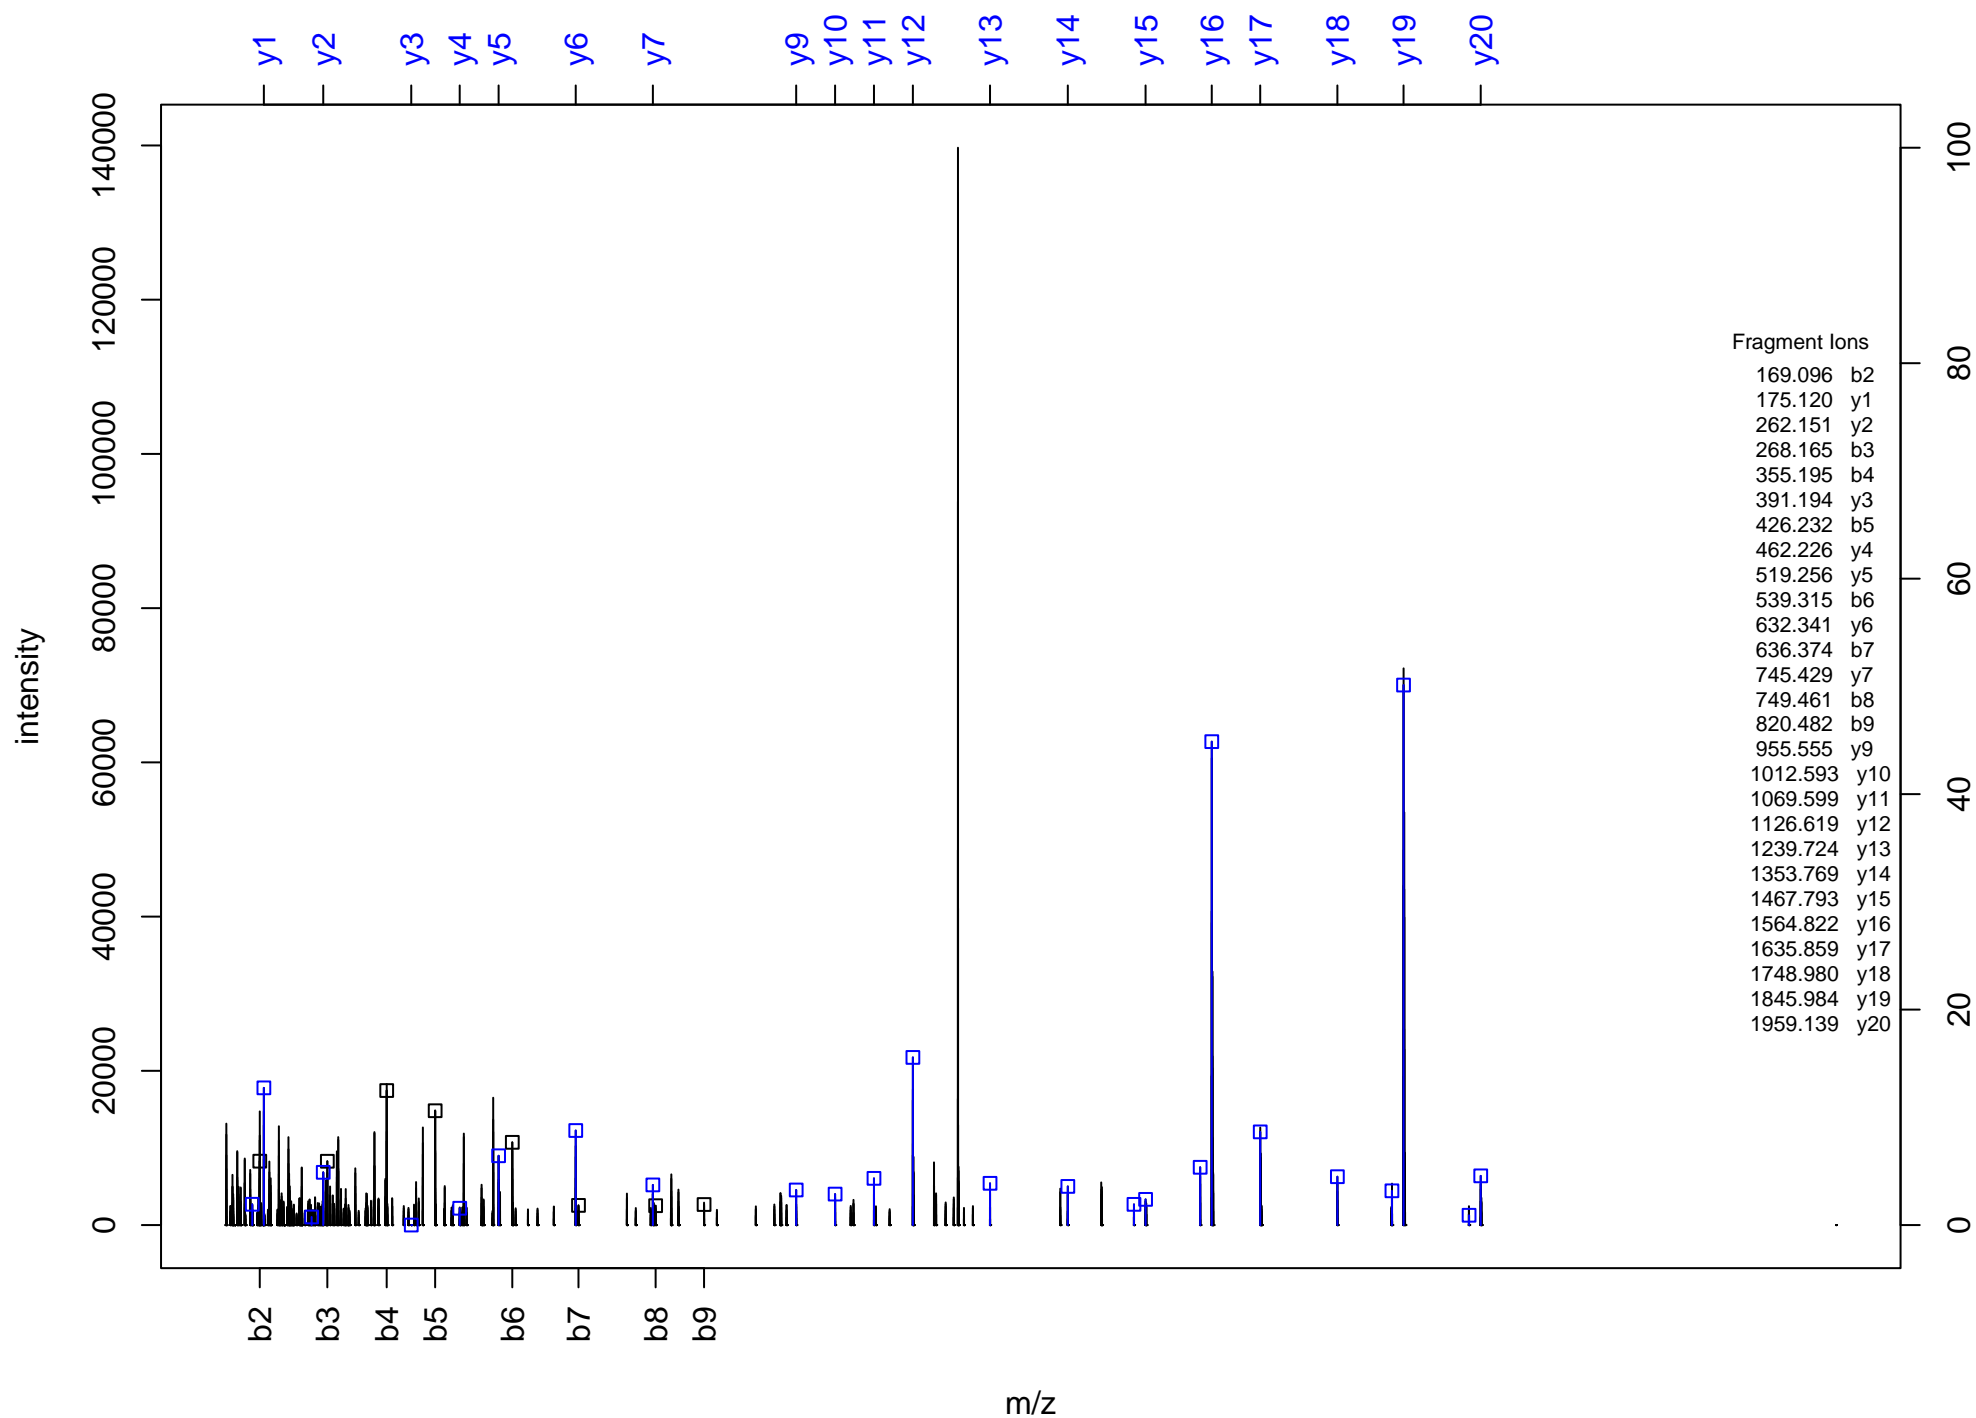

# QNRPIPQWIR

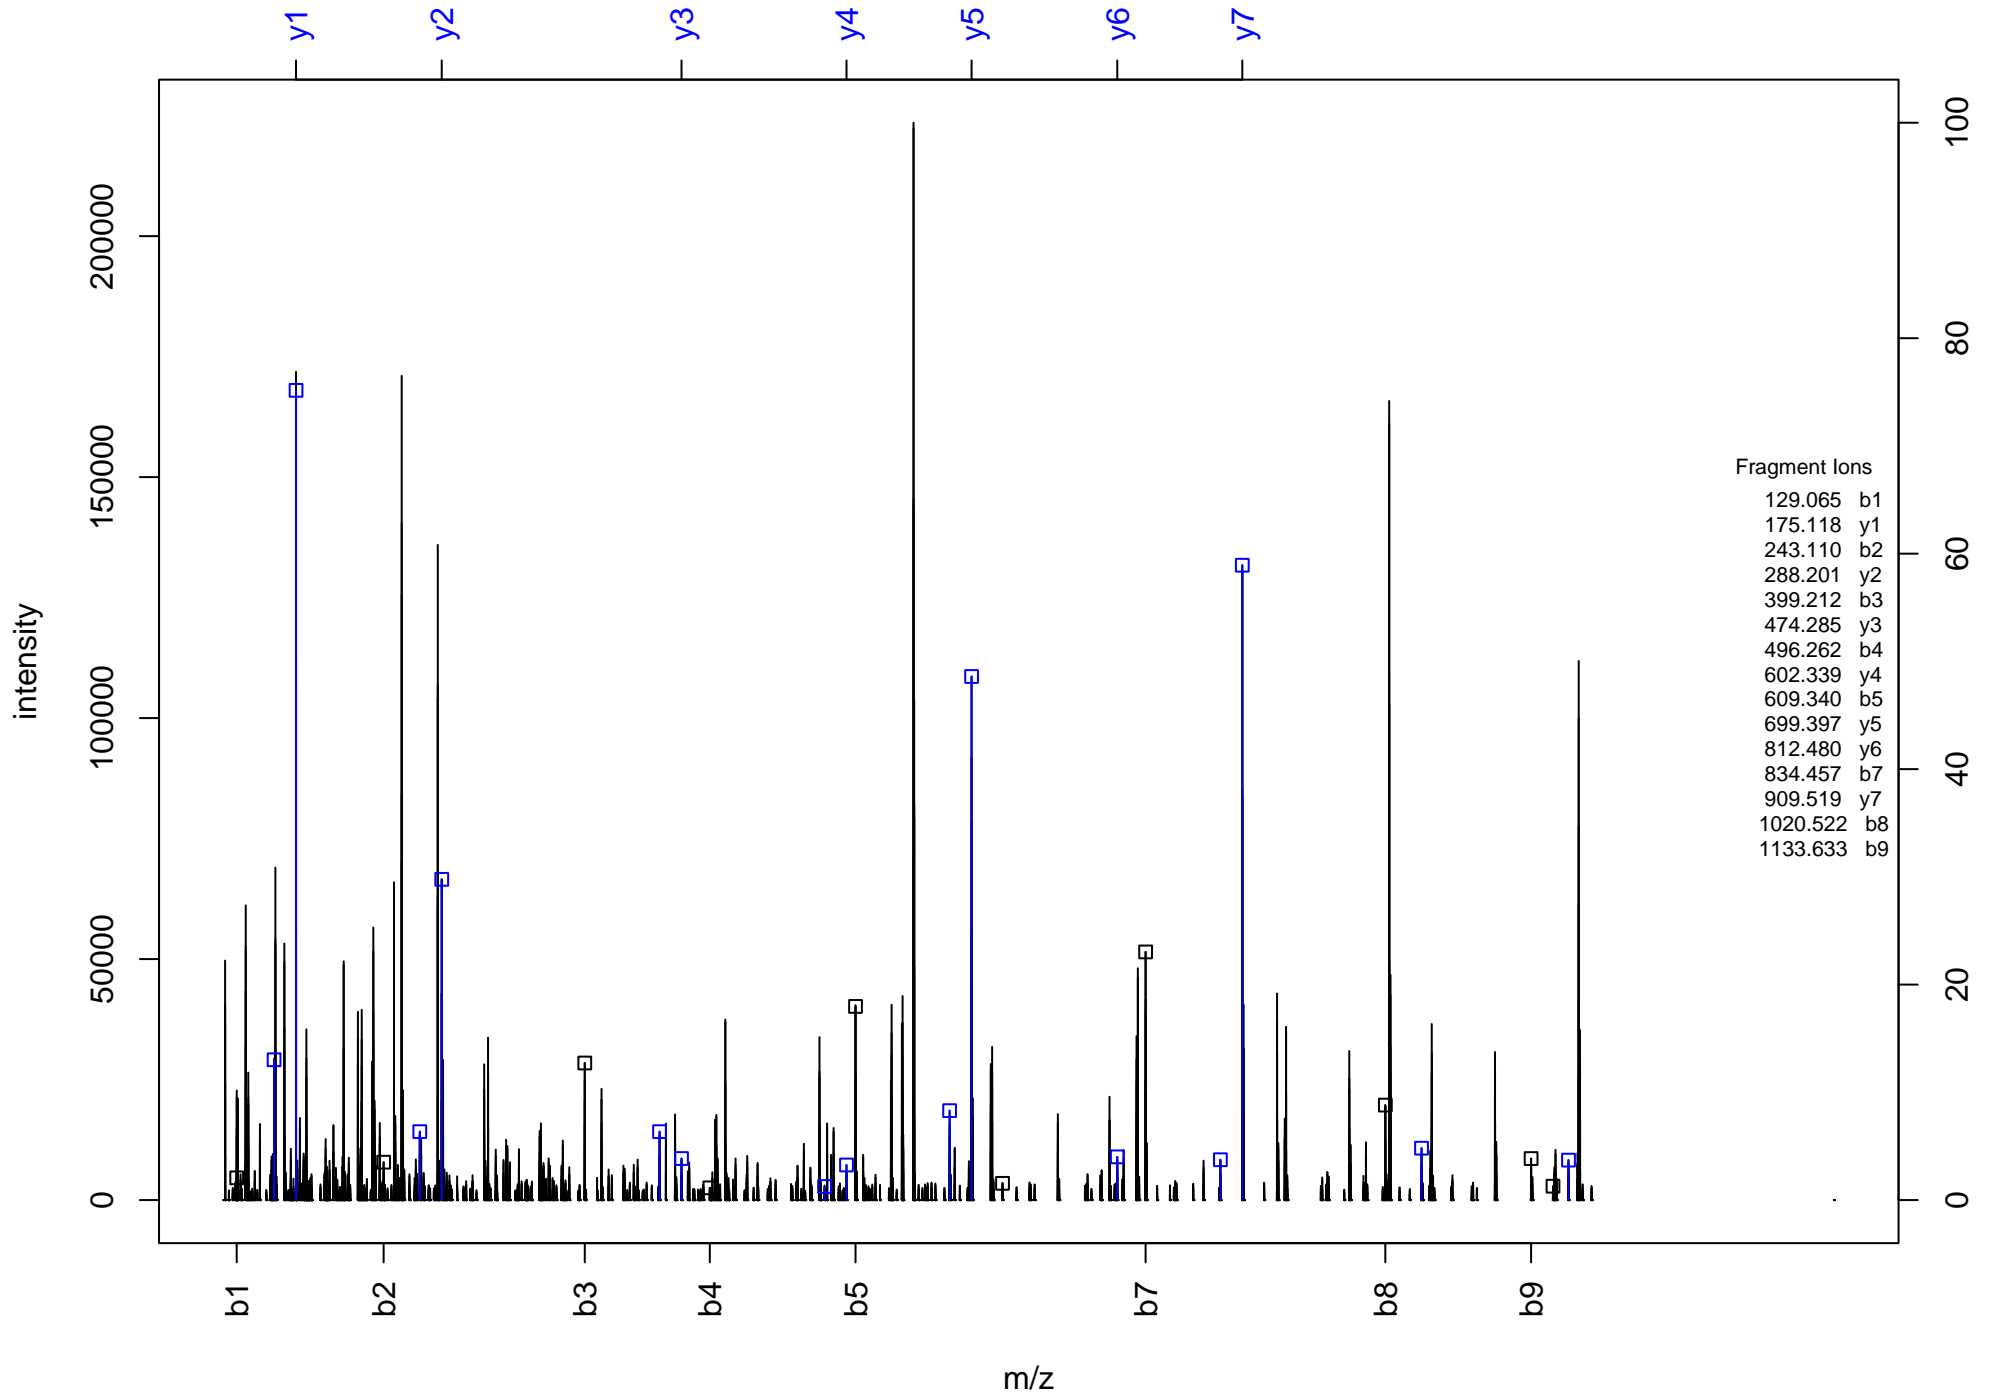

# DFMIQGGDPTGTGR

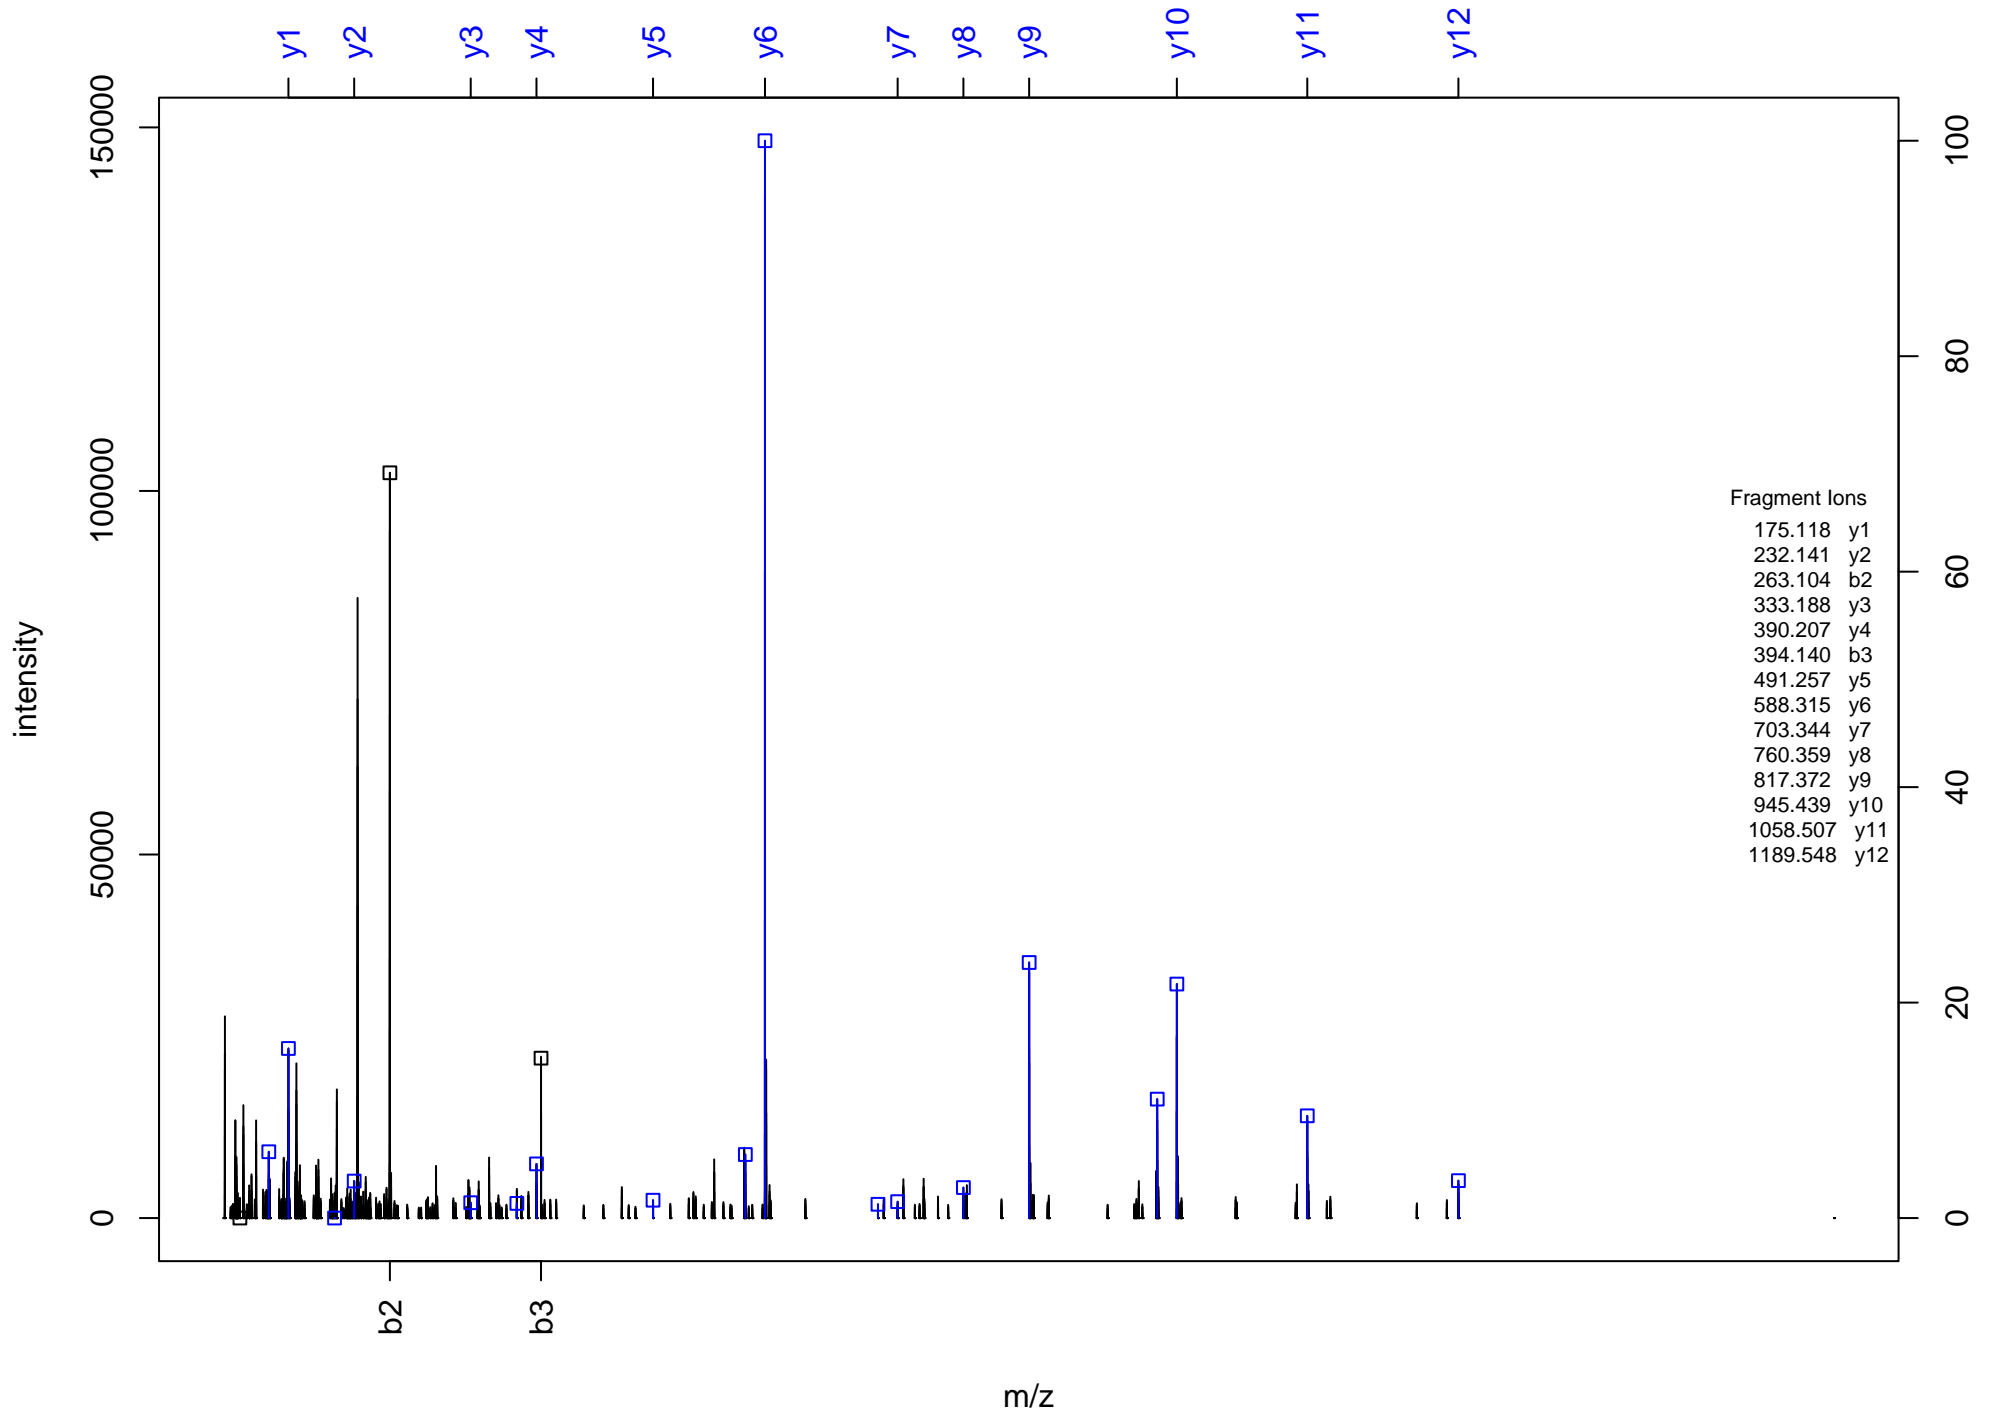

# M\*ASRGN^KIVIHLEM\*GAK

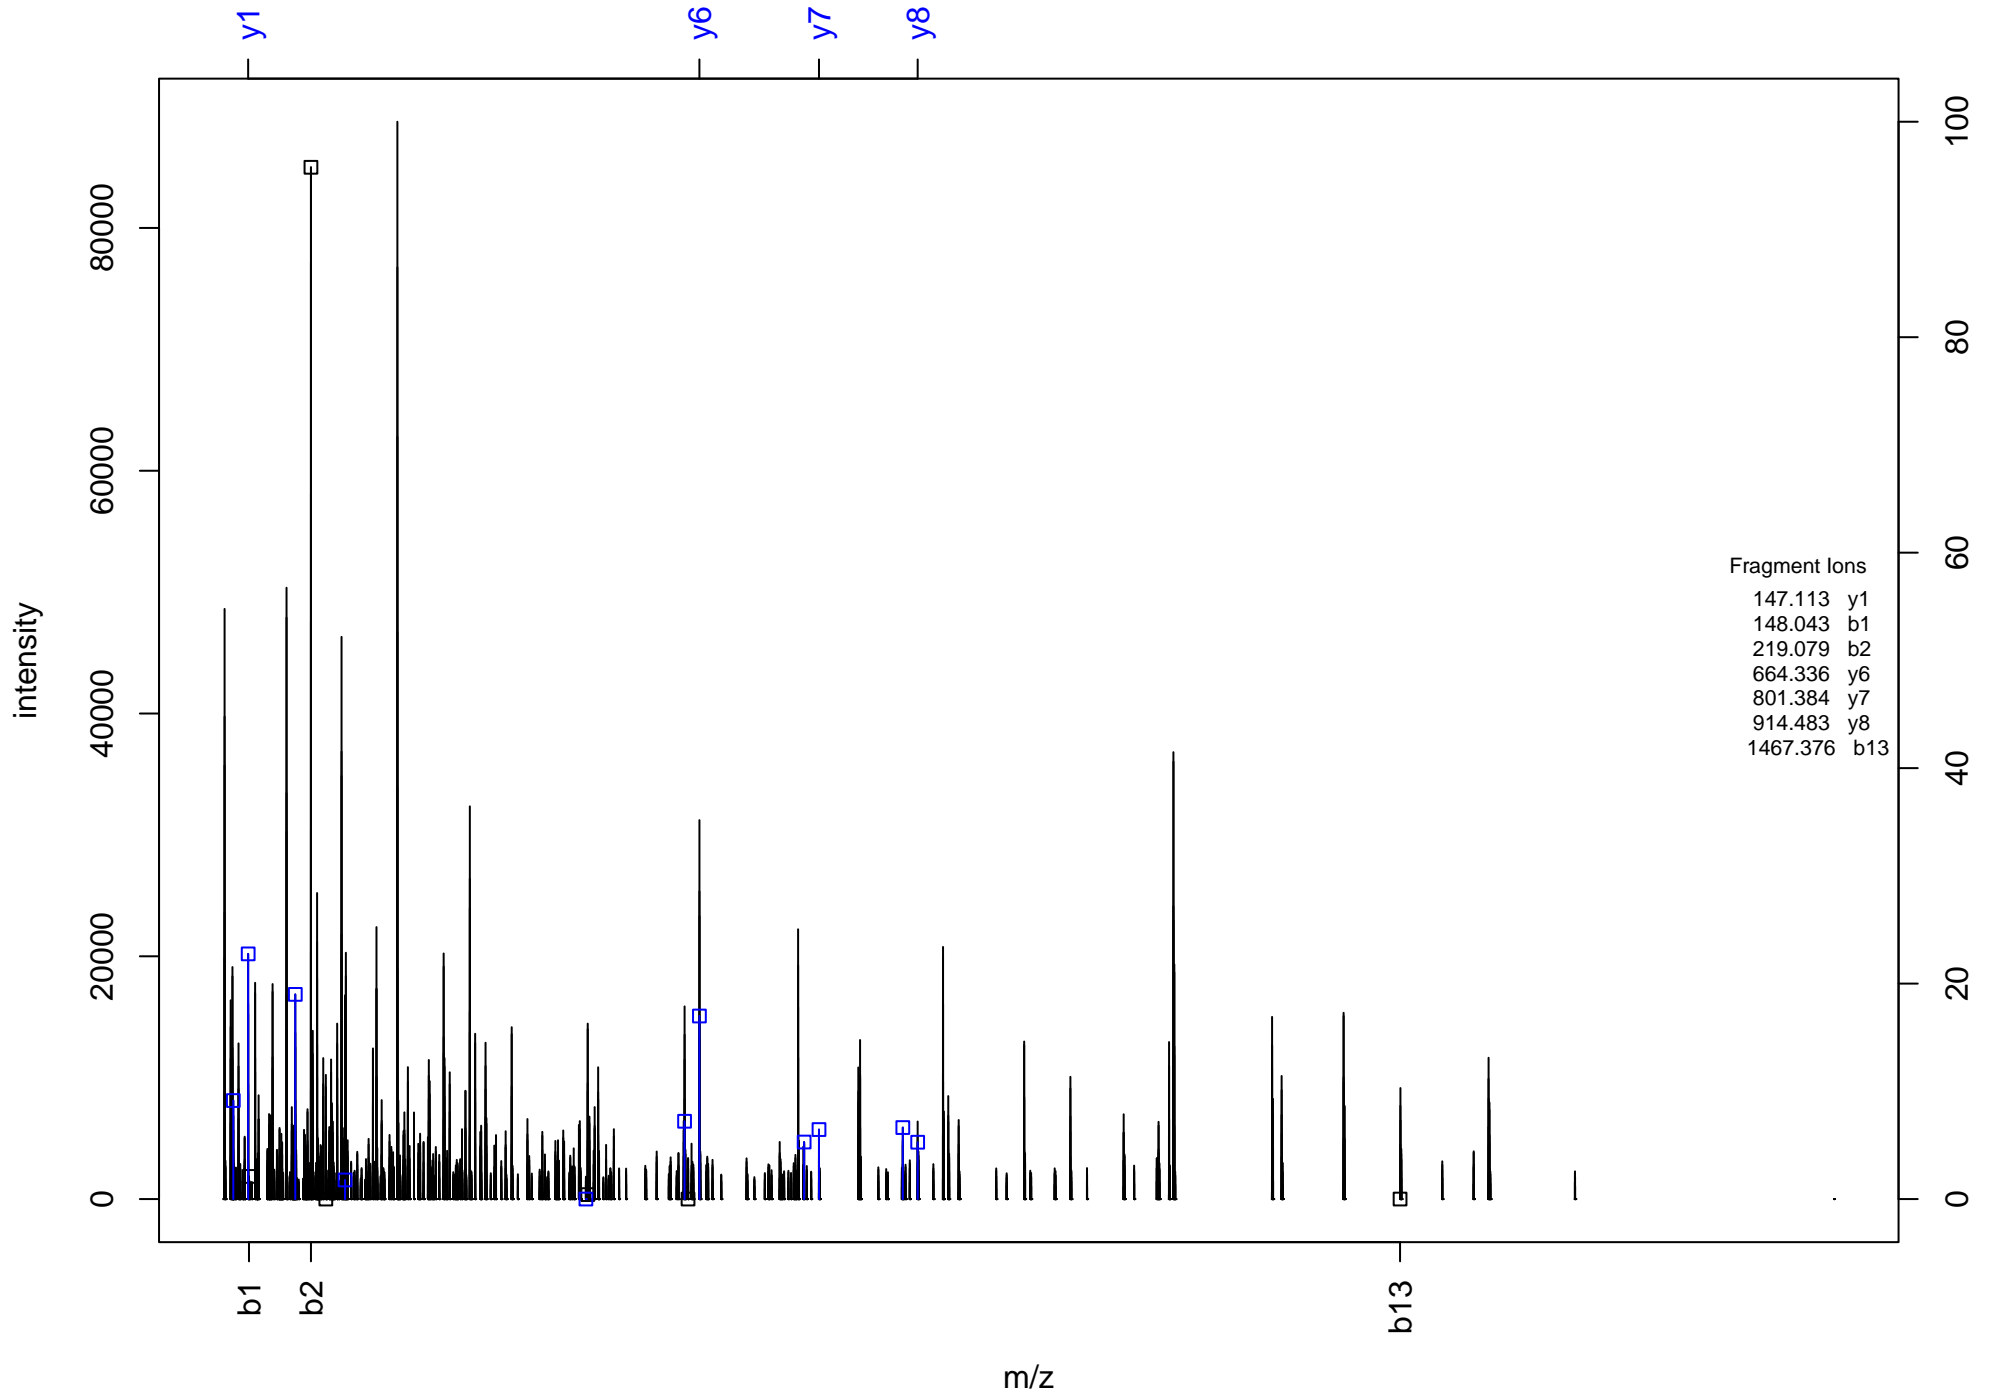

# TIFDTPDEDPNYNPLPEERPGGFAWGEGQR

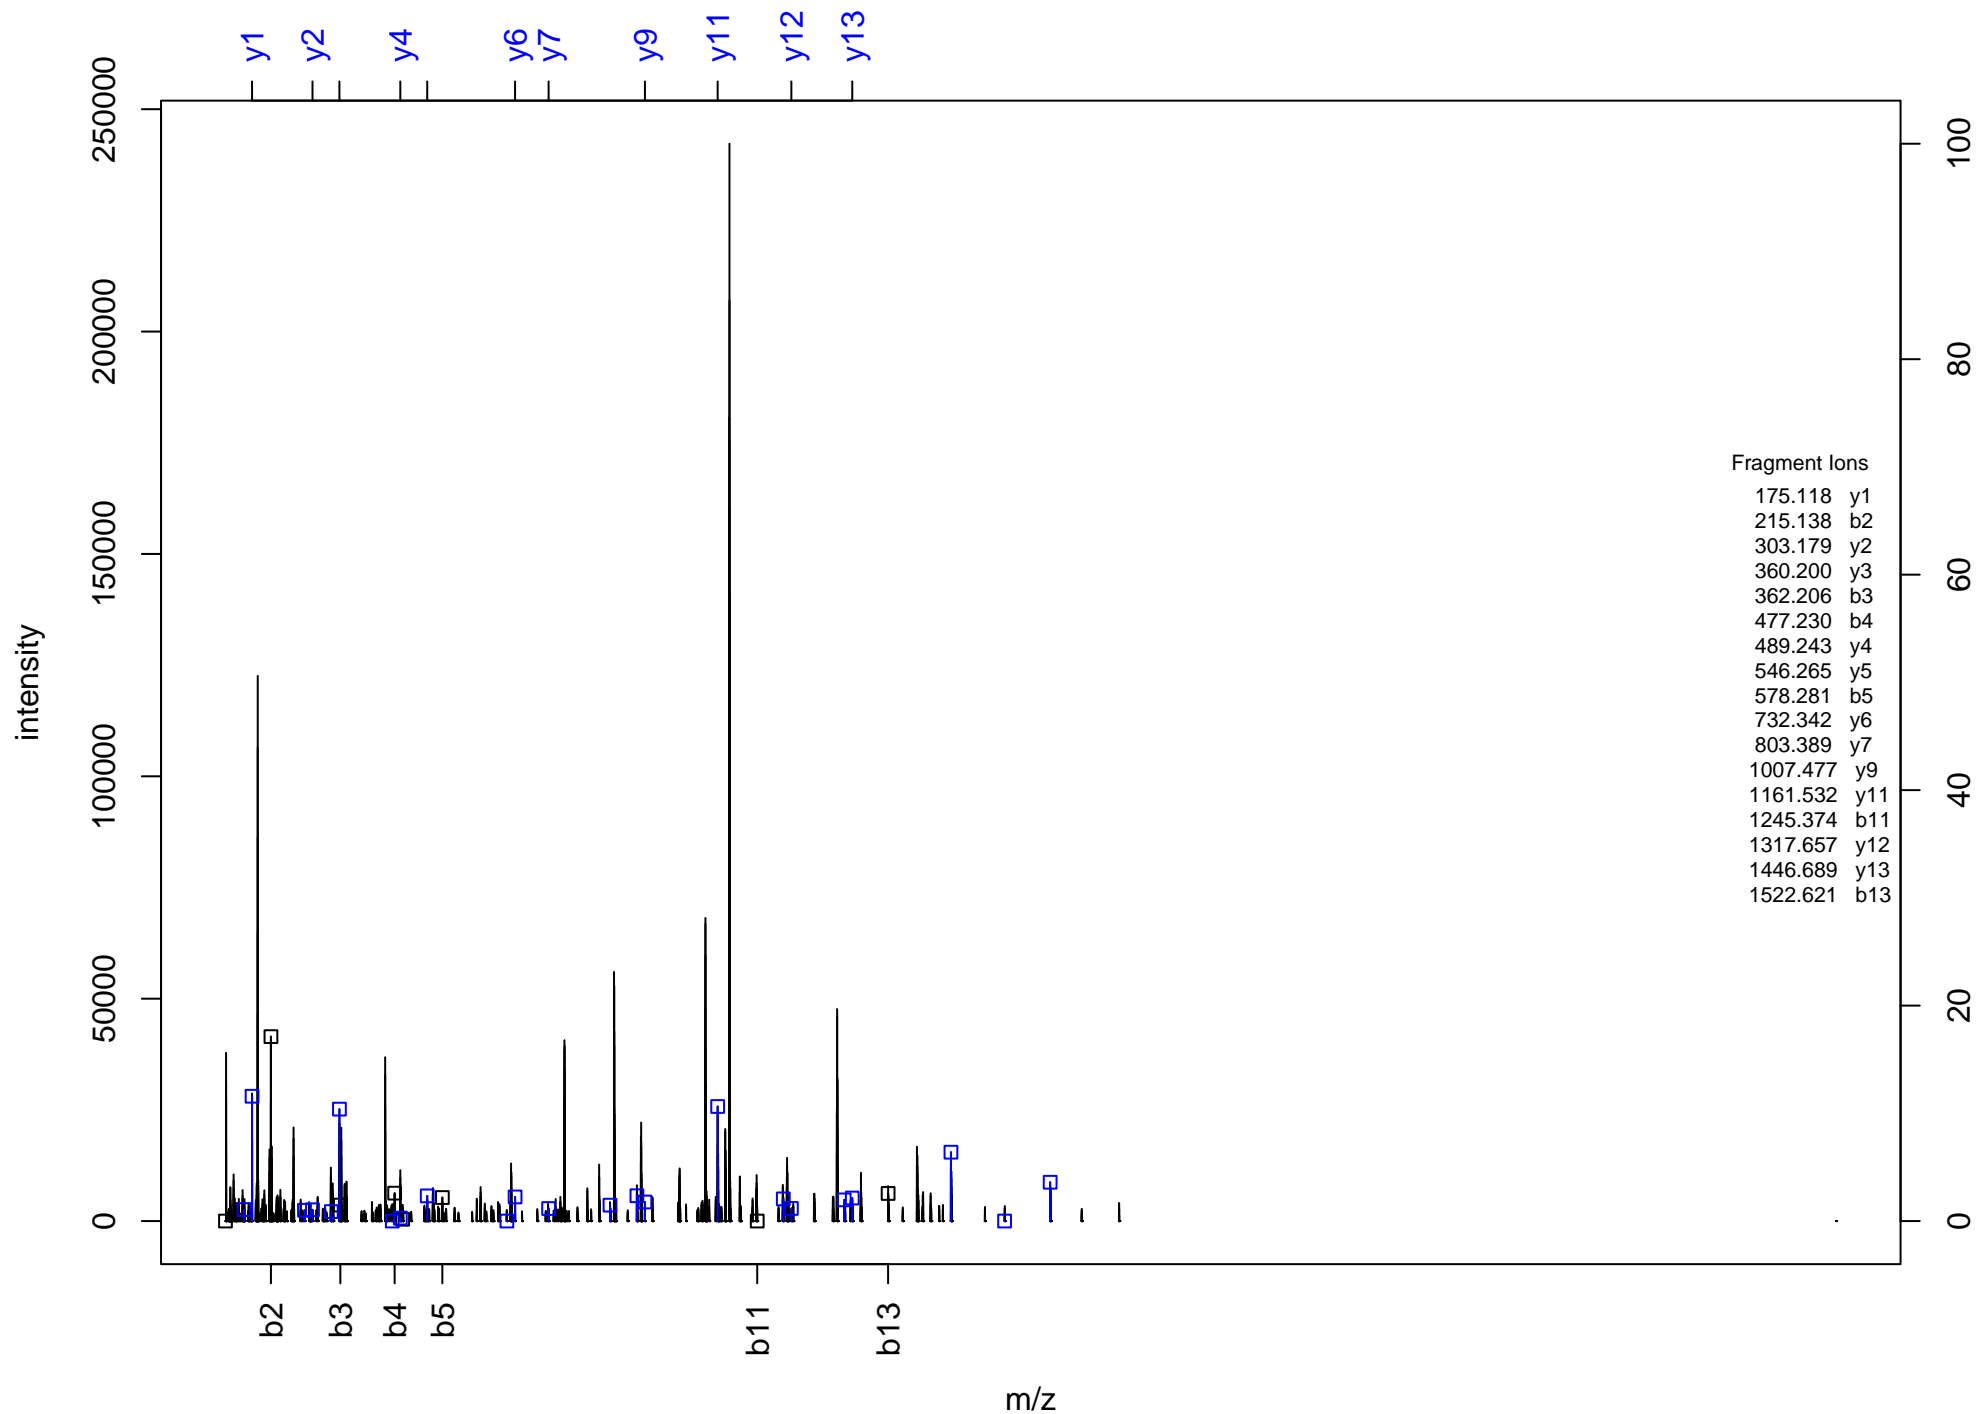

# M\*EPLQVVK

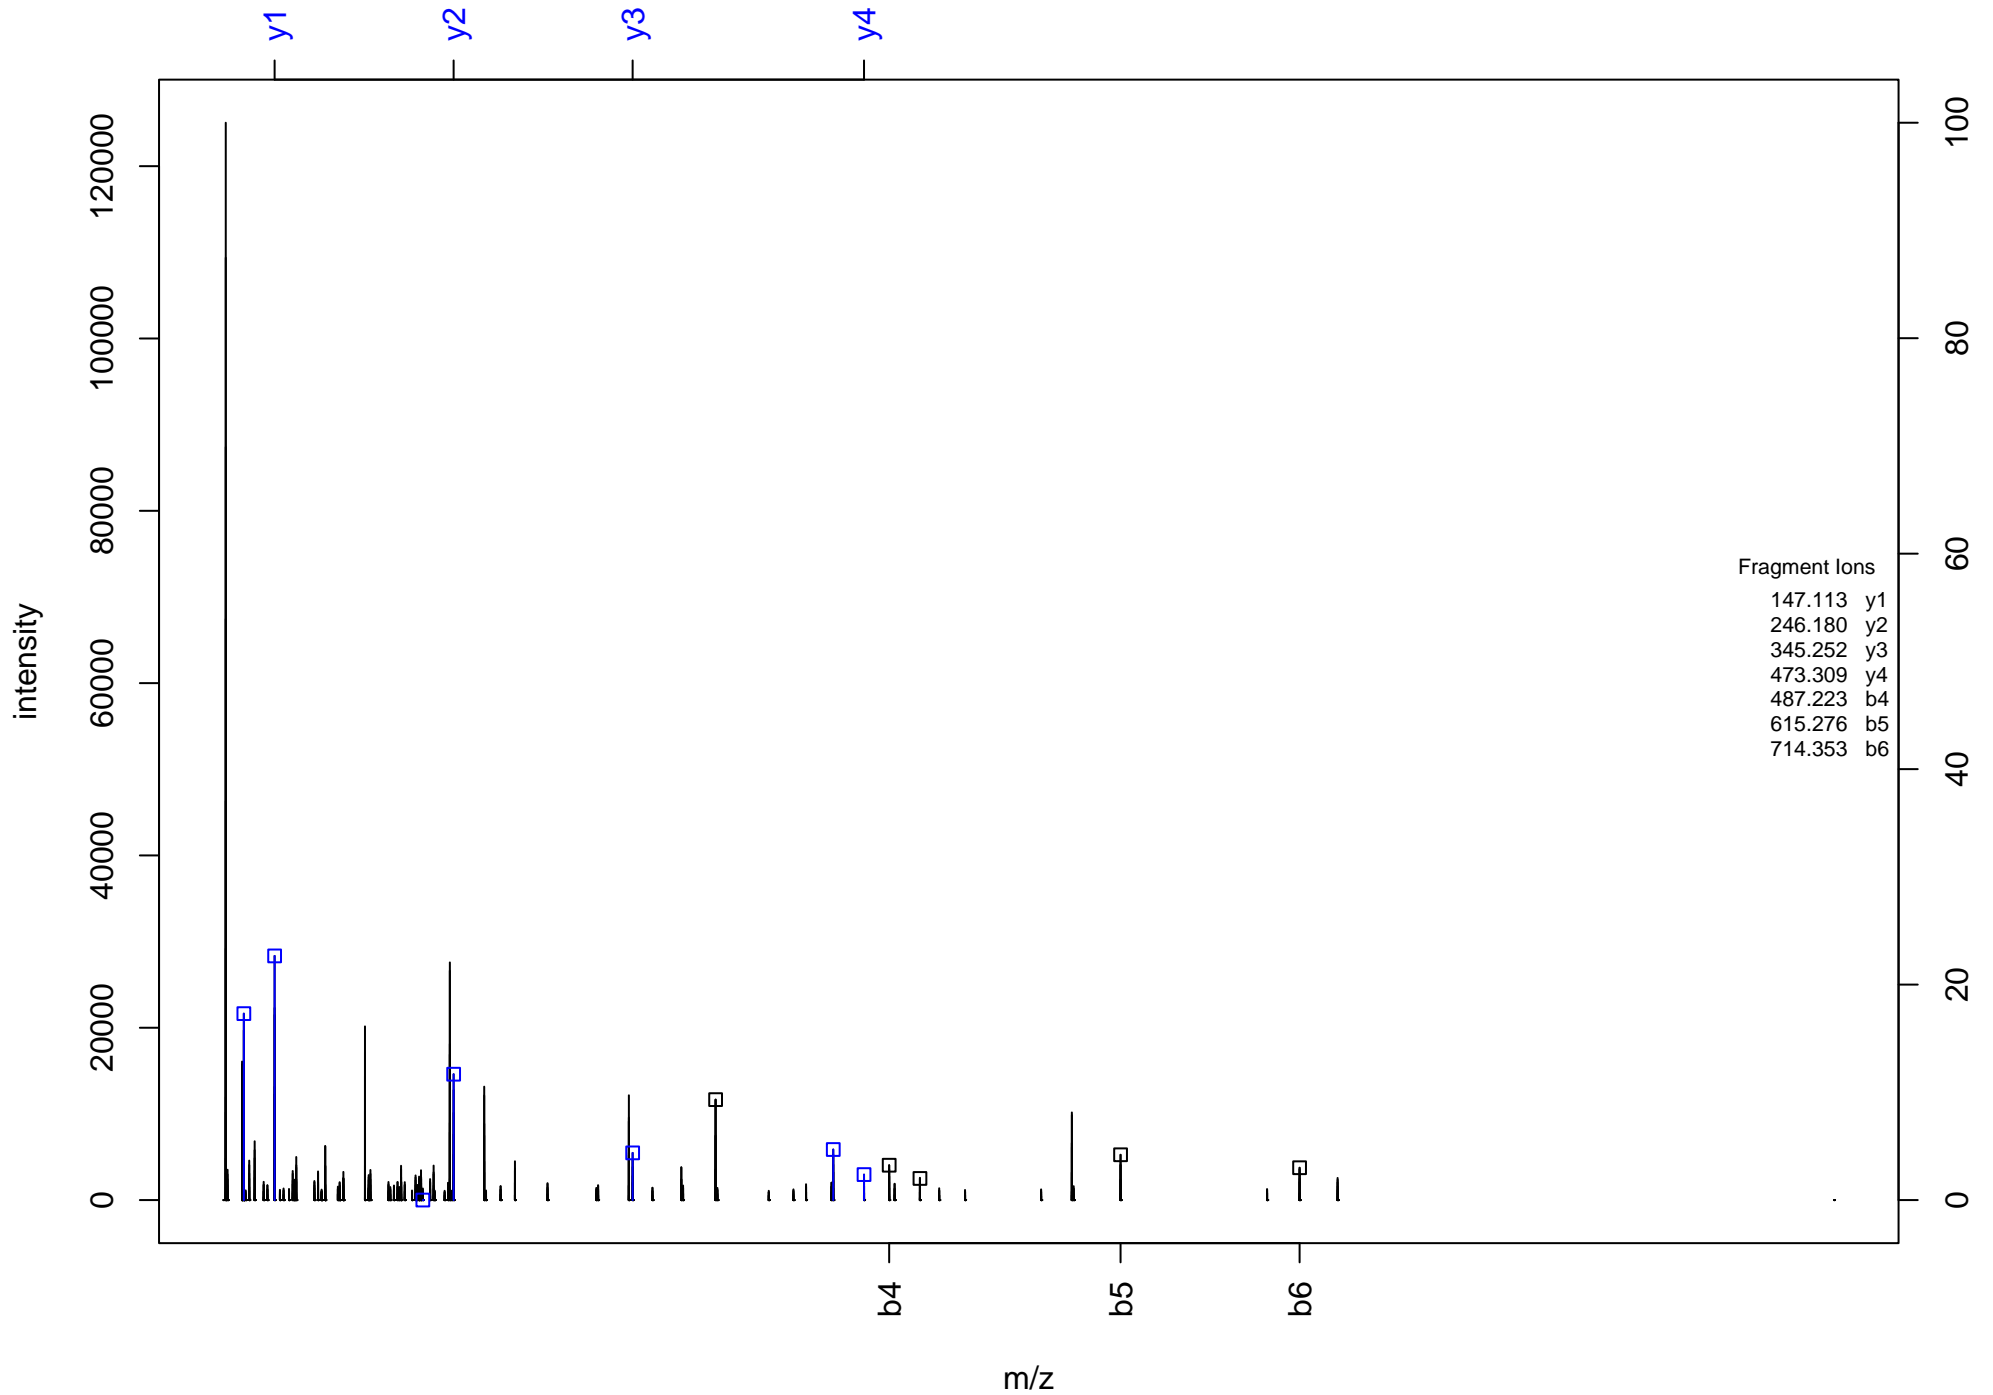

# LFLSVGDDCLR

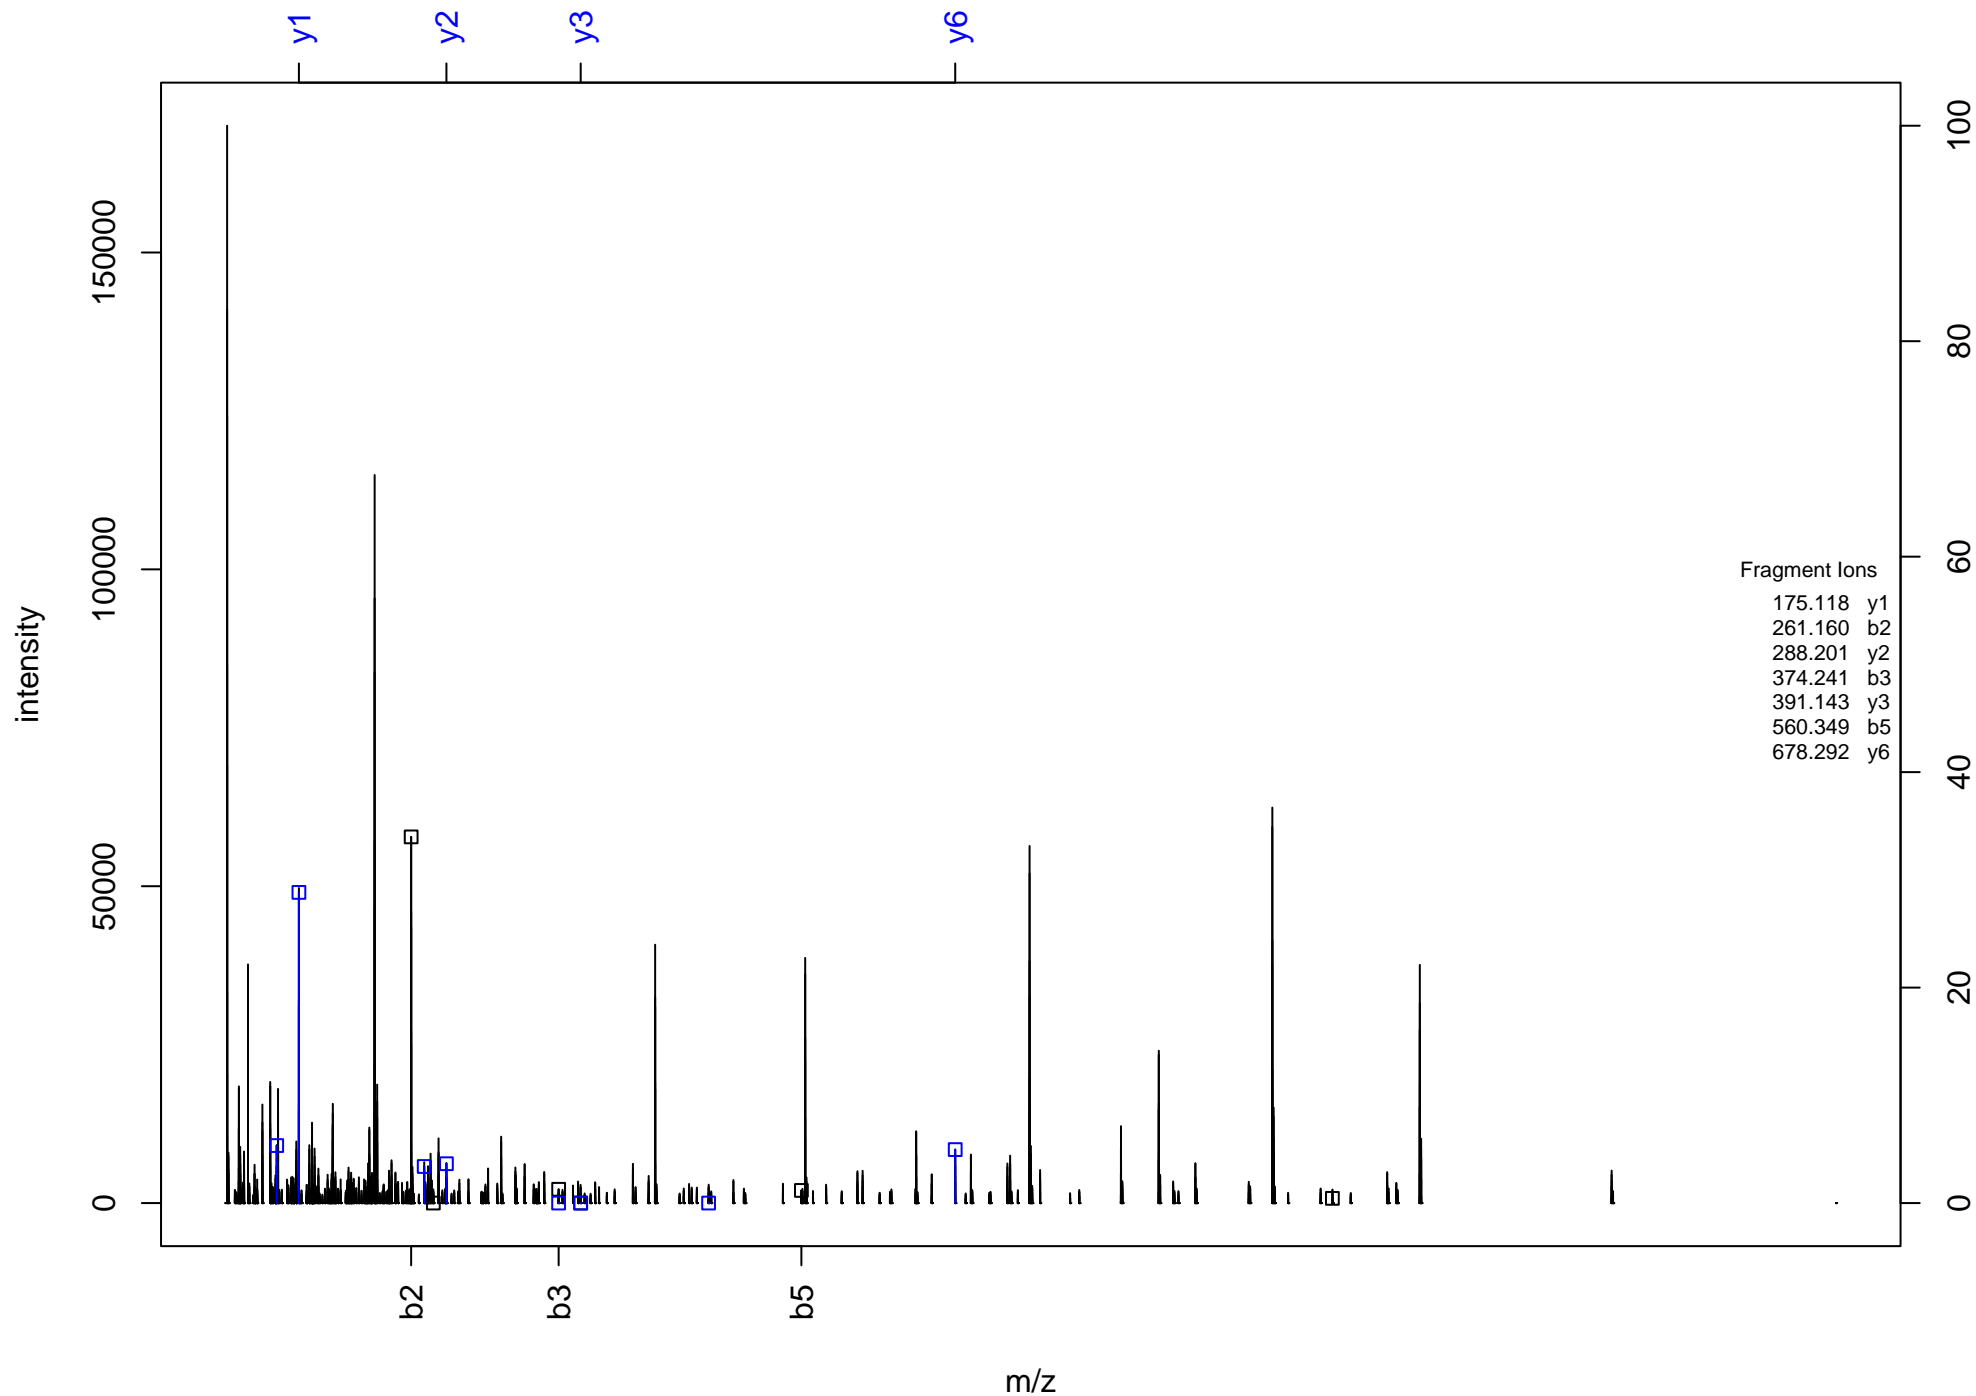



# AFLEHMSEVQPDSPQGIYDTLLELR

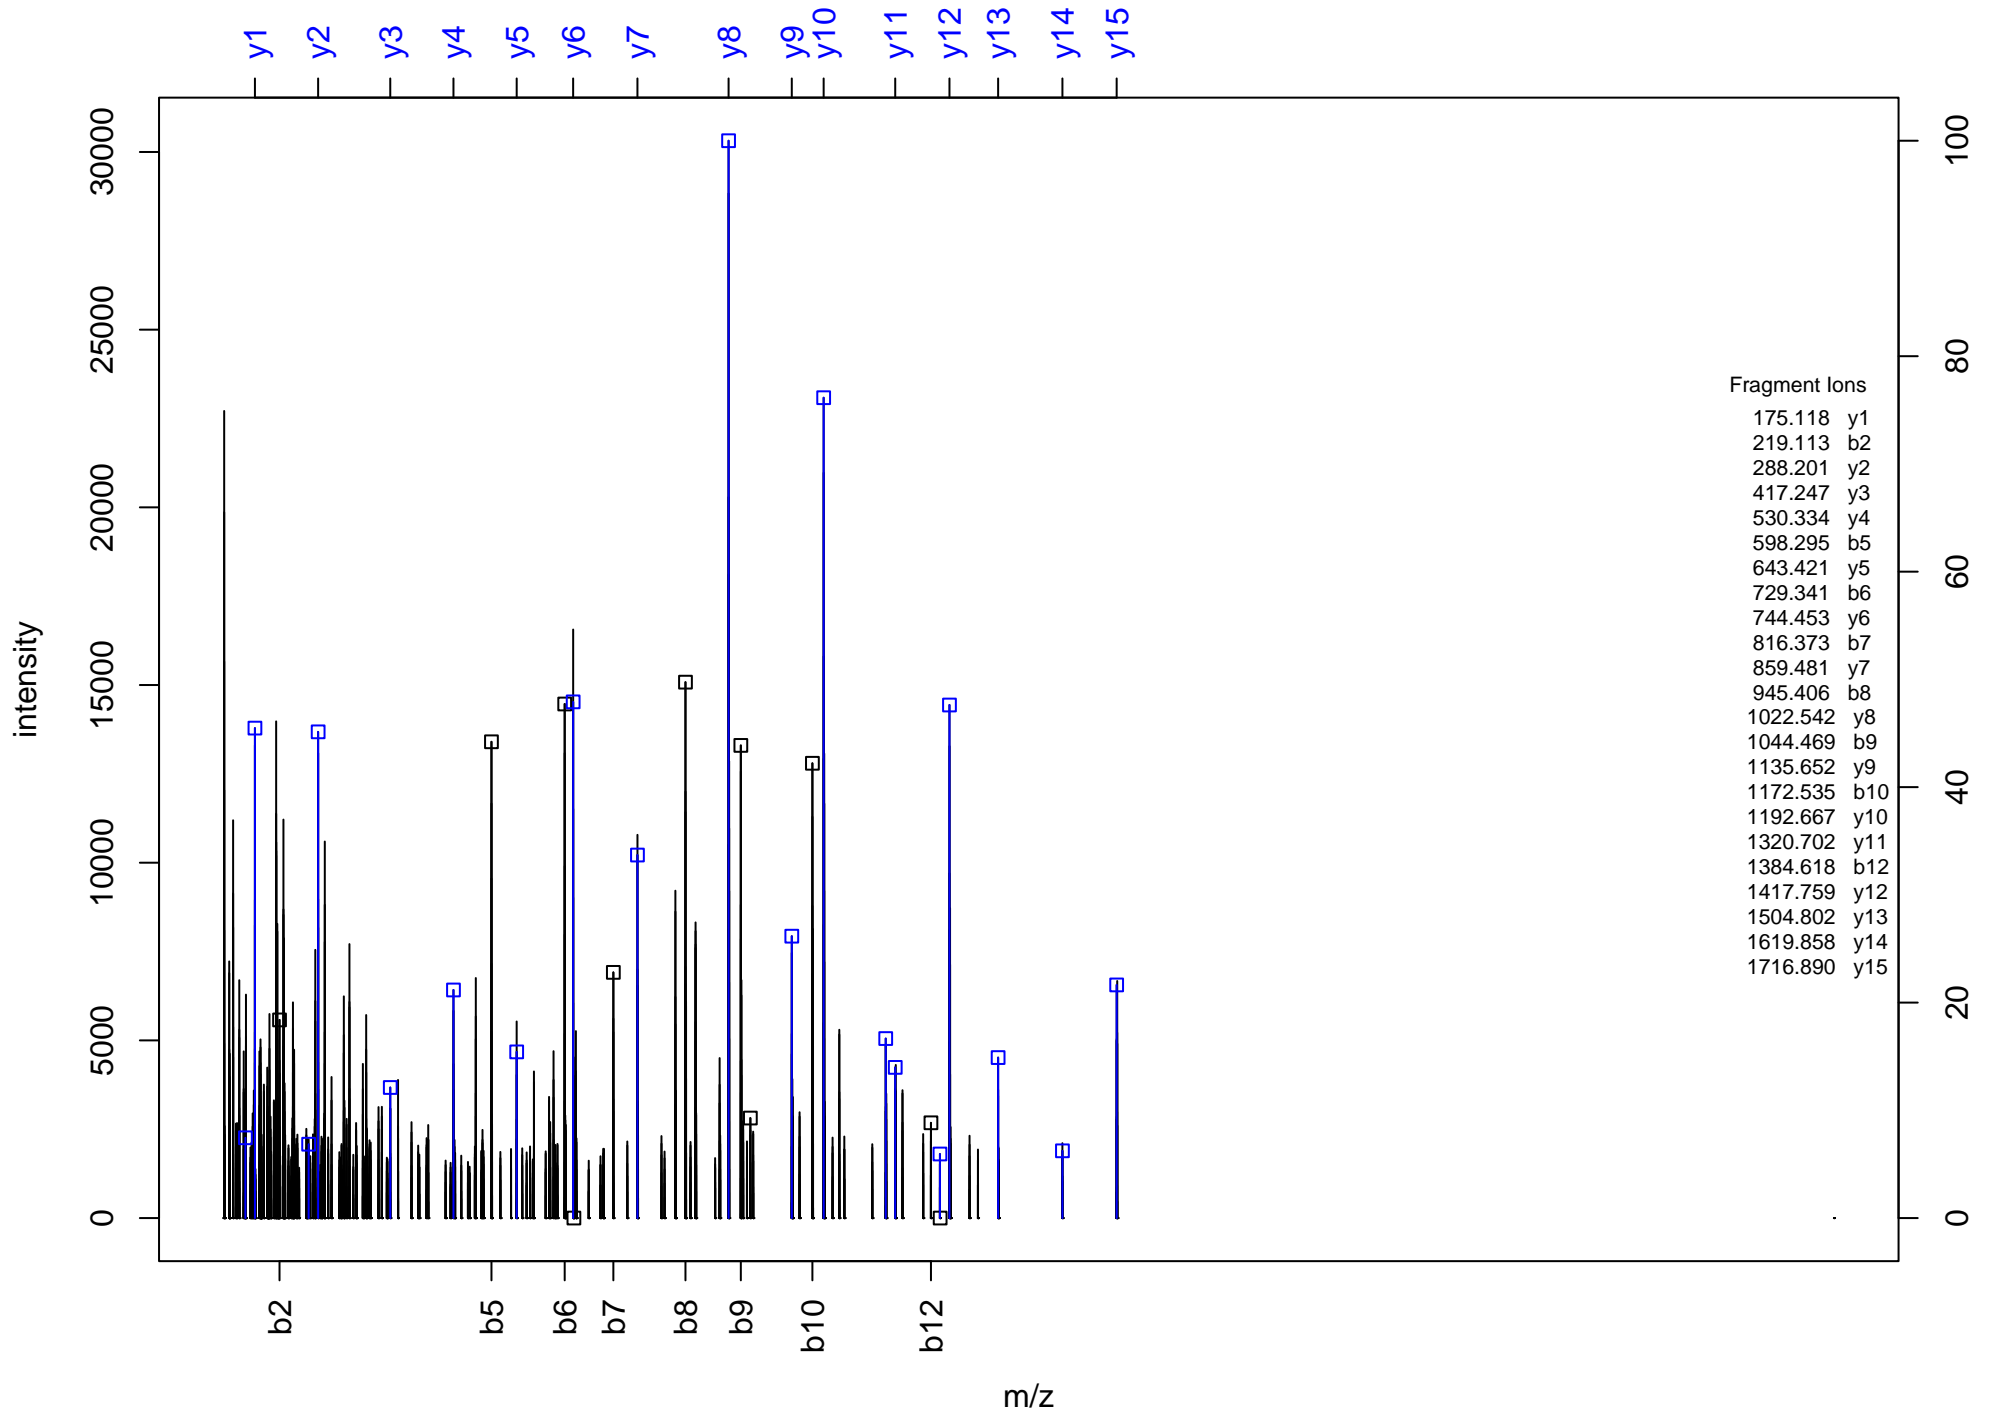

# TELQGLIGQLDEVSLK

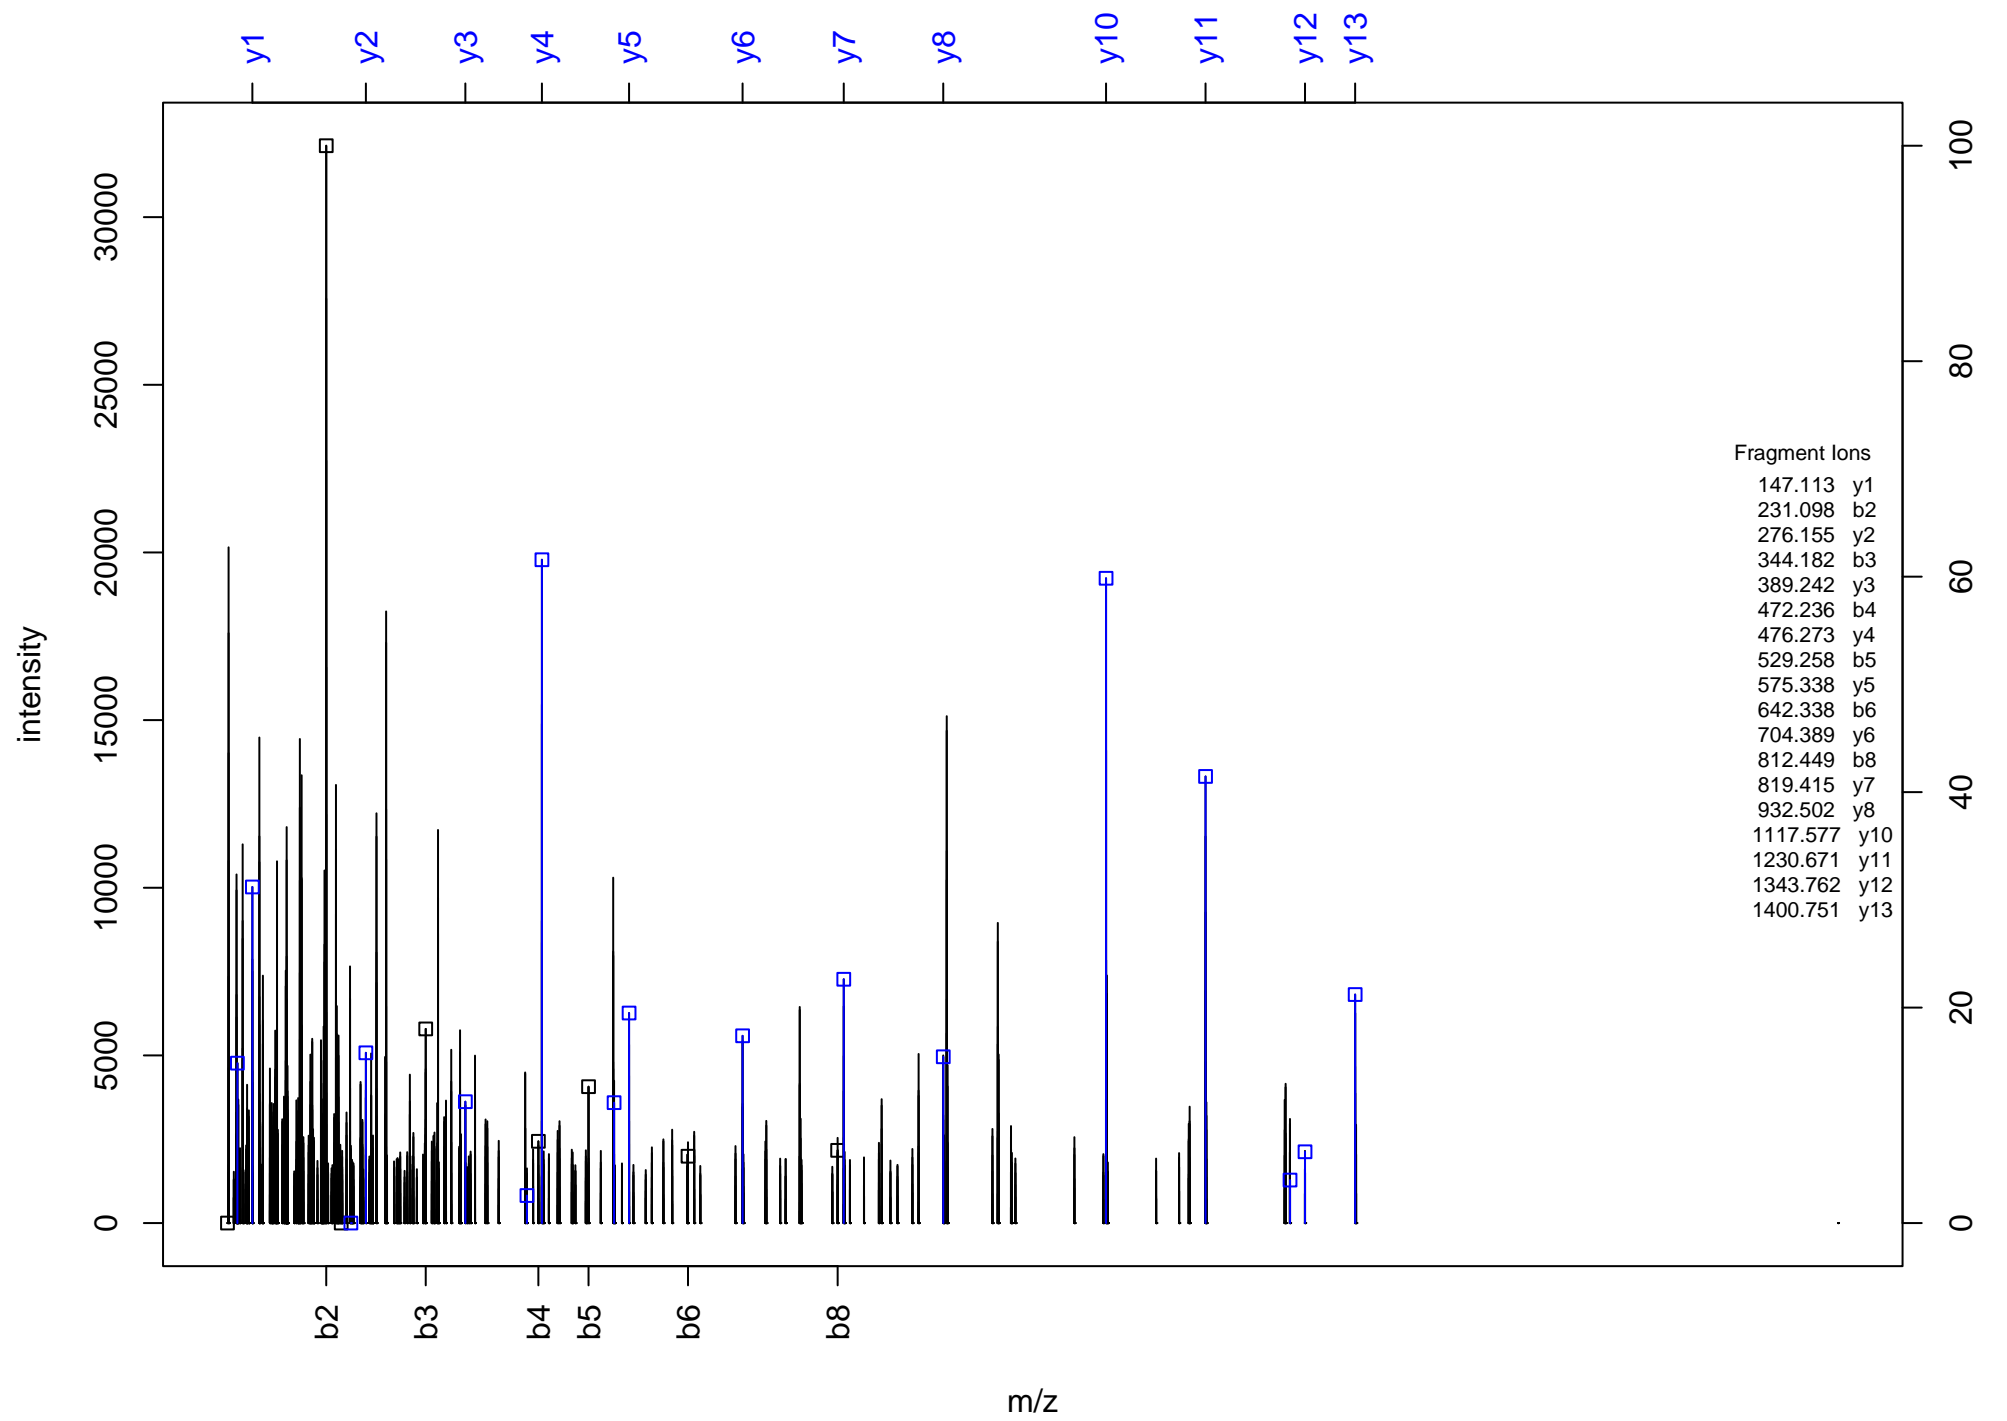

# LGEQVFGTTGK

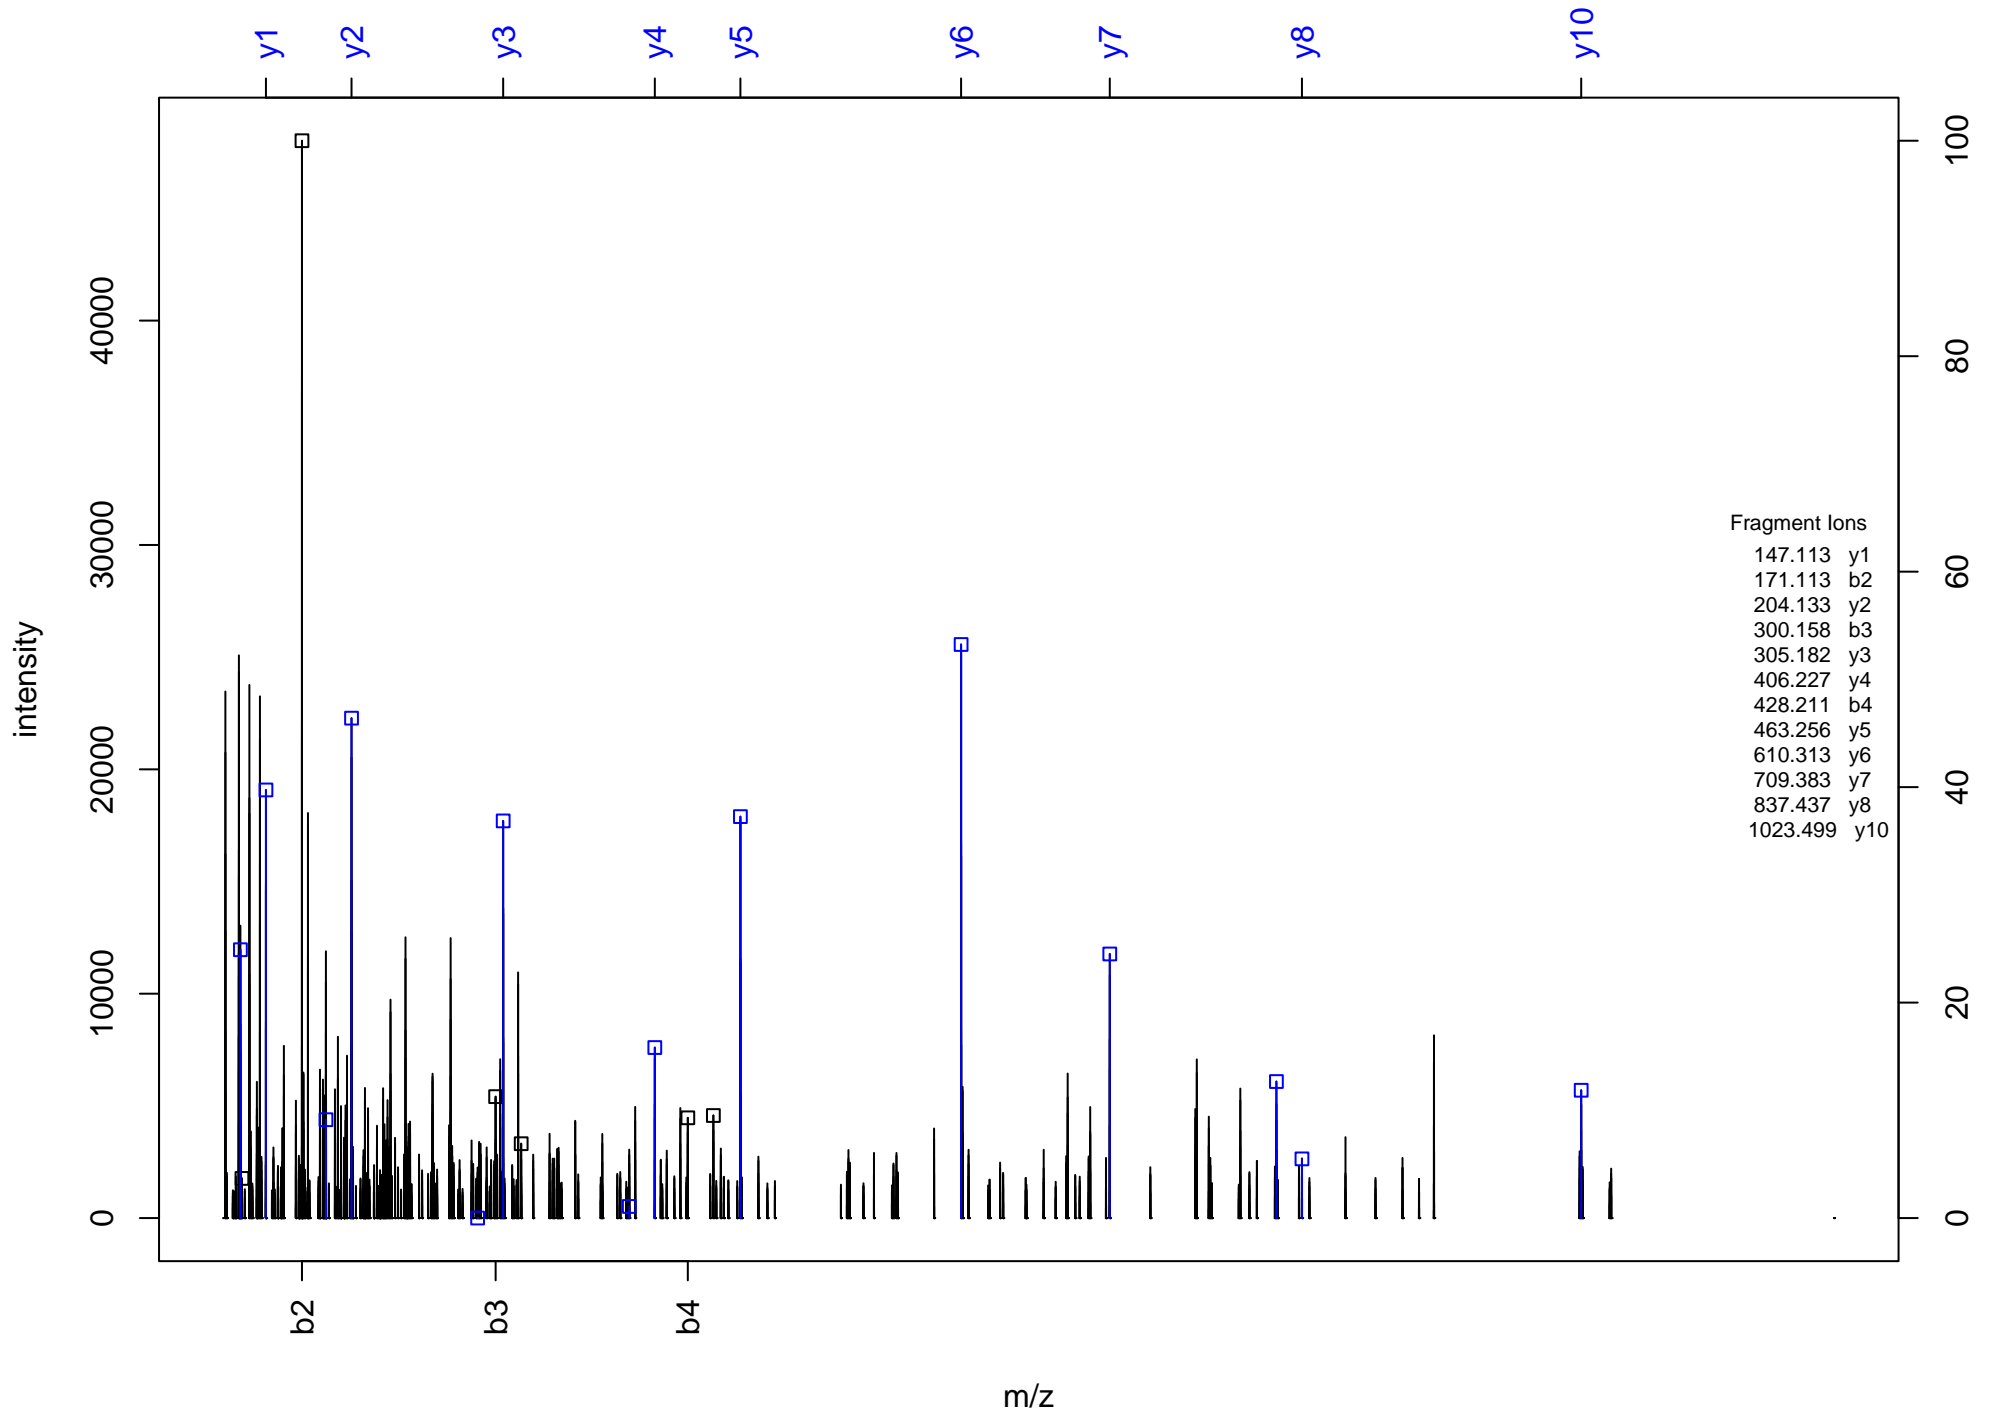

# FRENVQDVLPTLPNPDDYFLLR

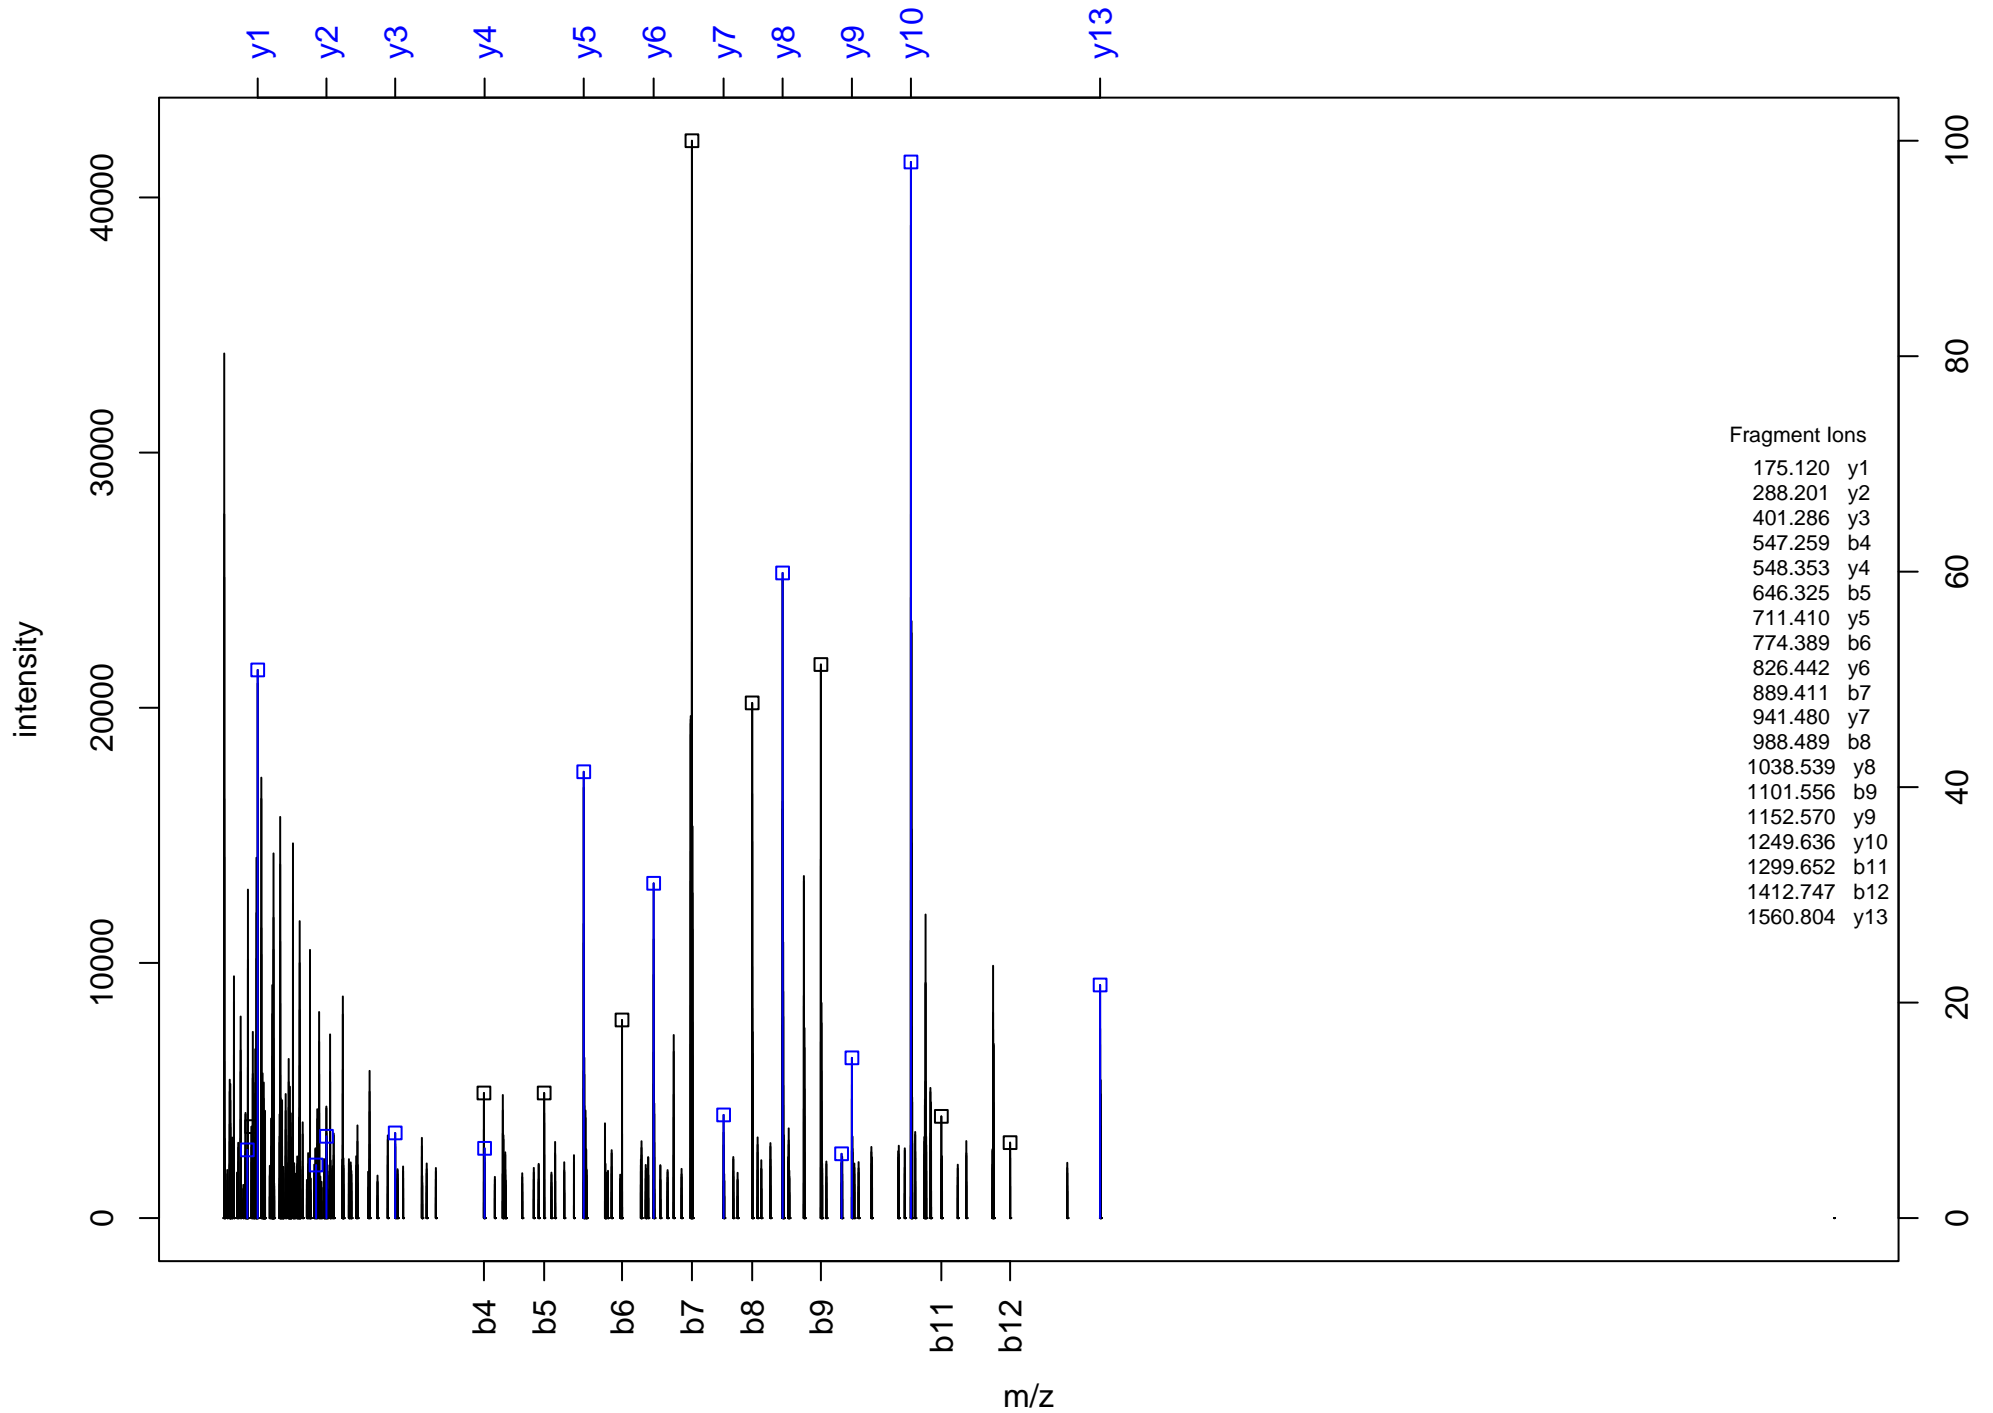

# HNELTGDNVGPLILK

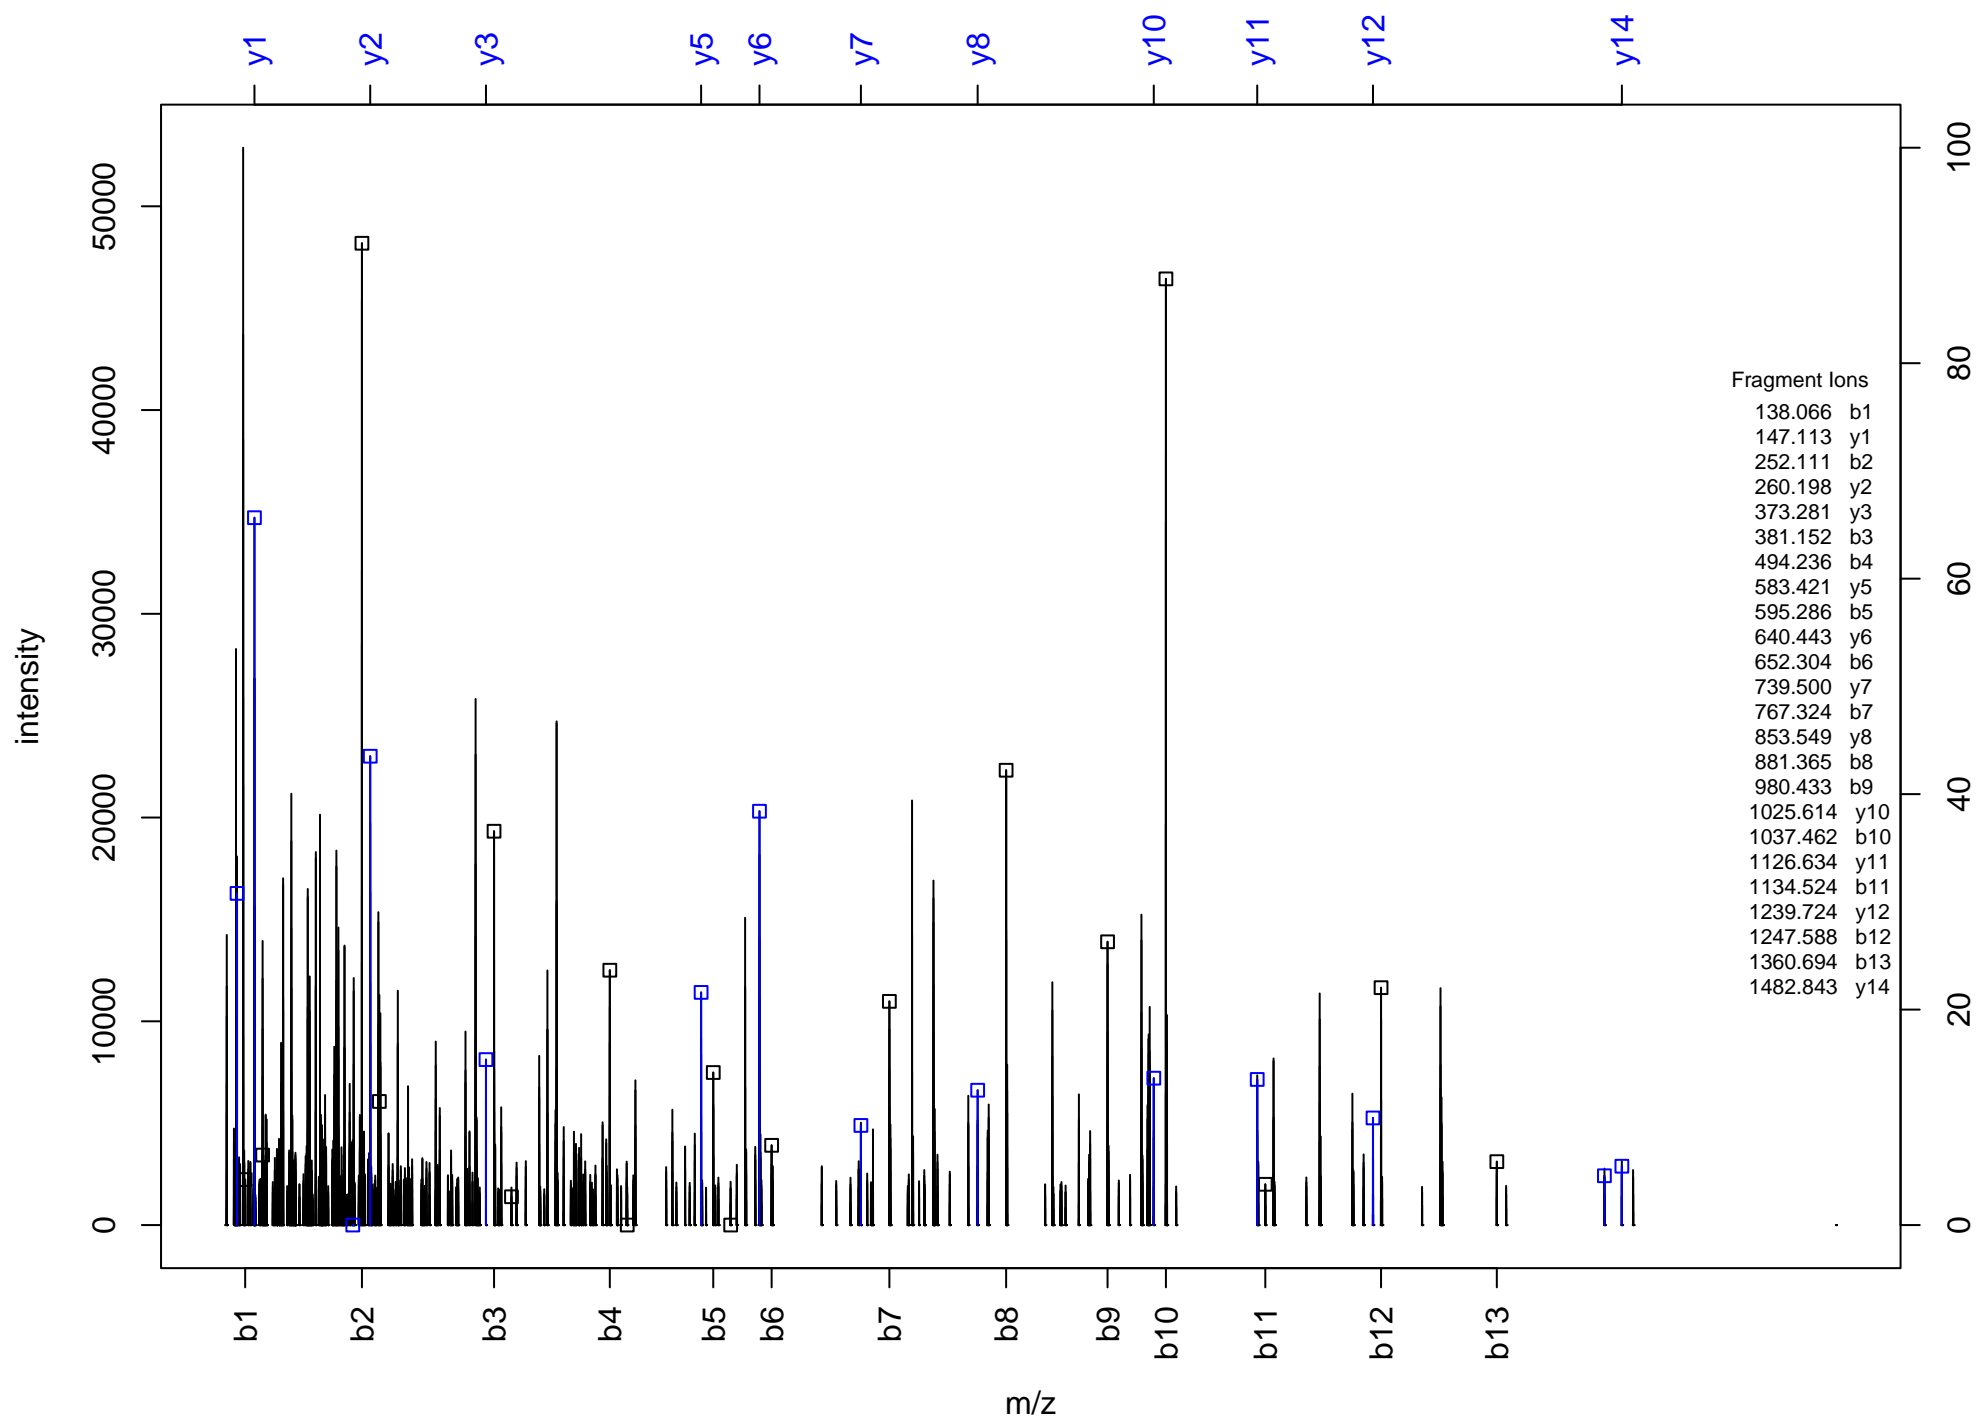

# TVFFWAPIMK

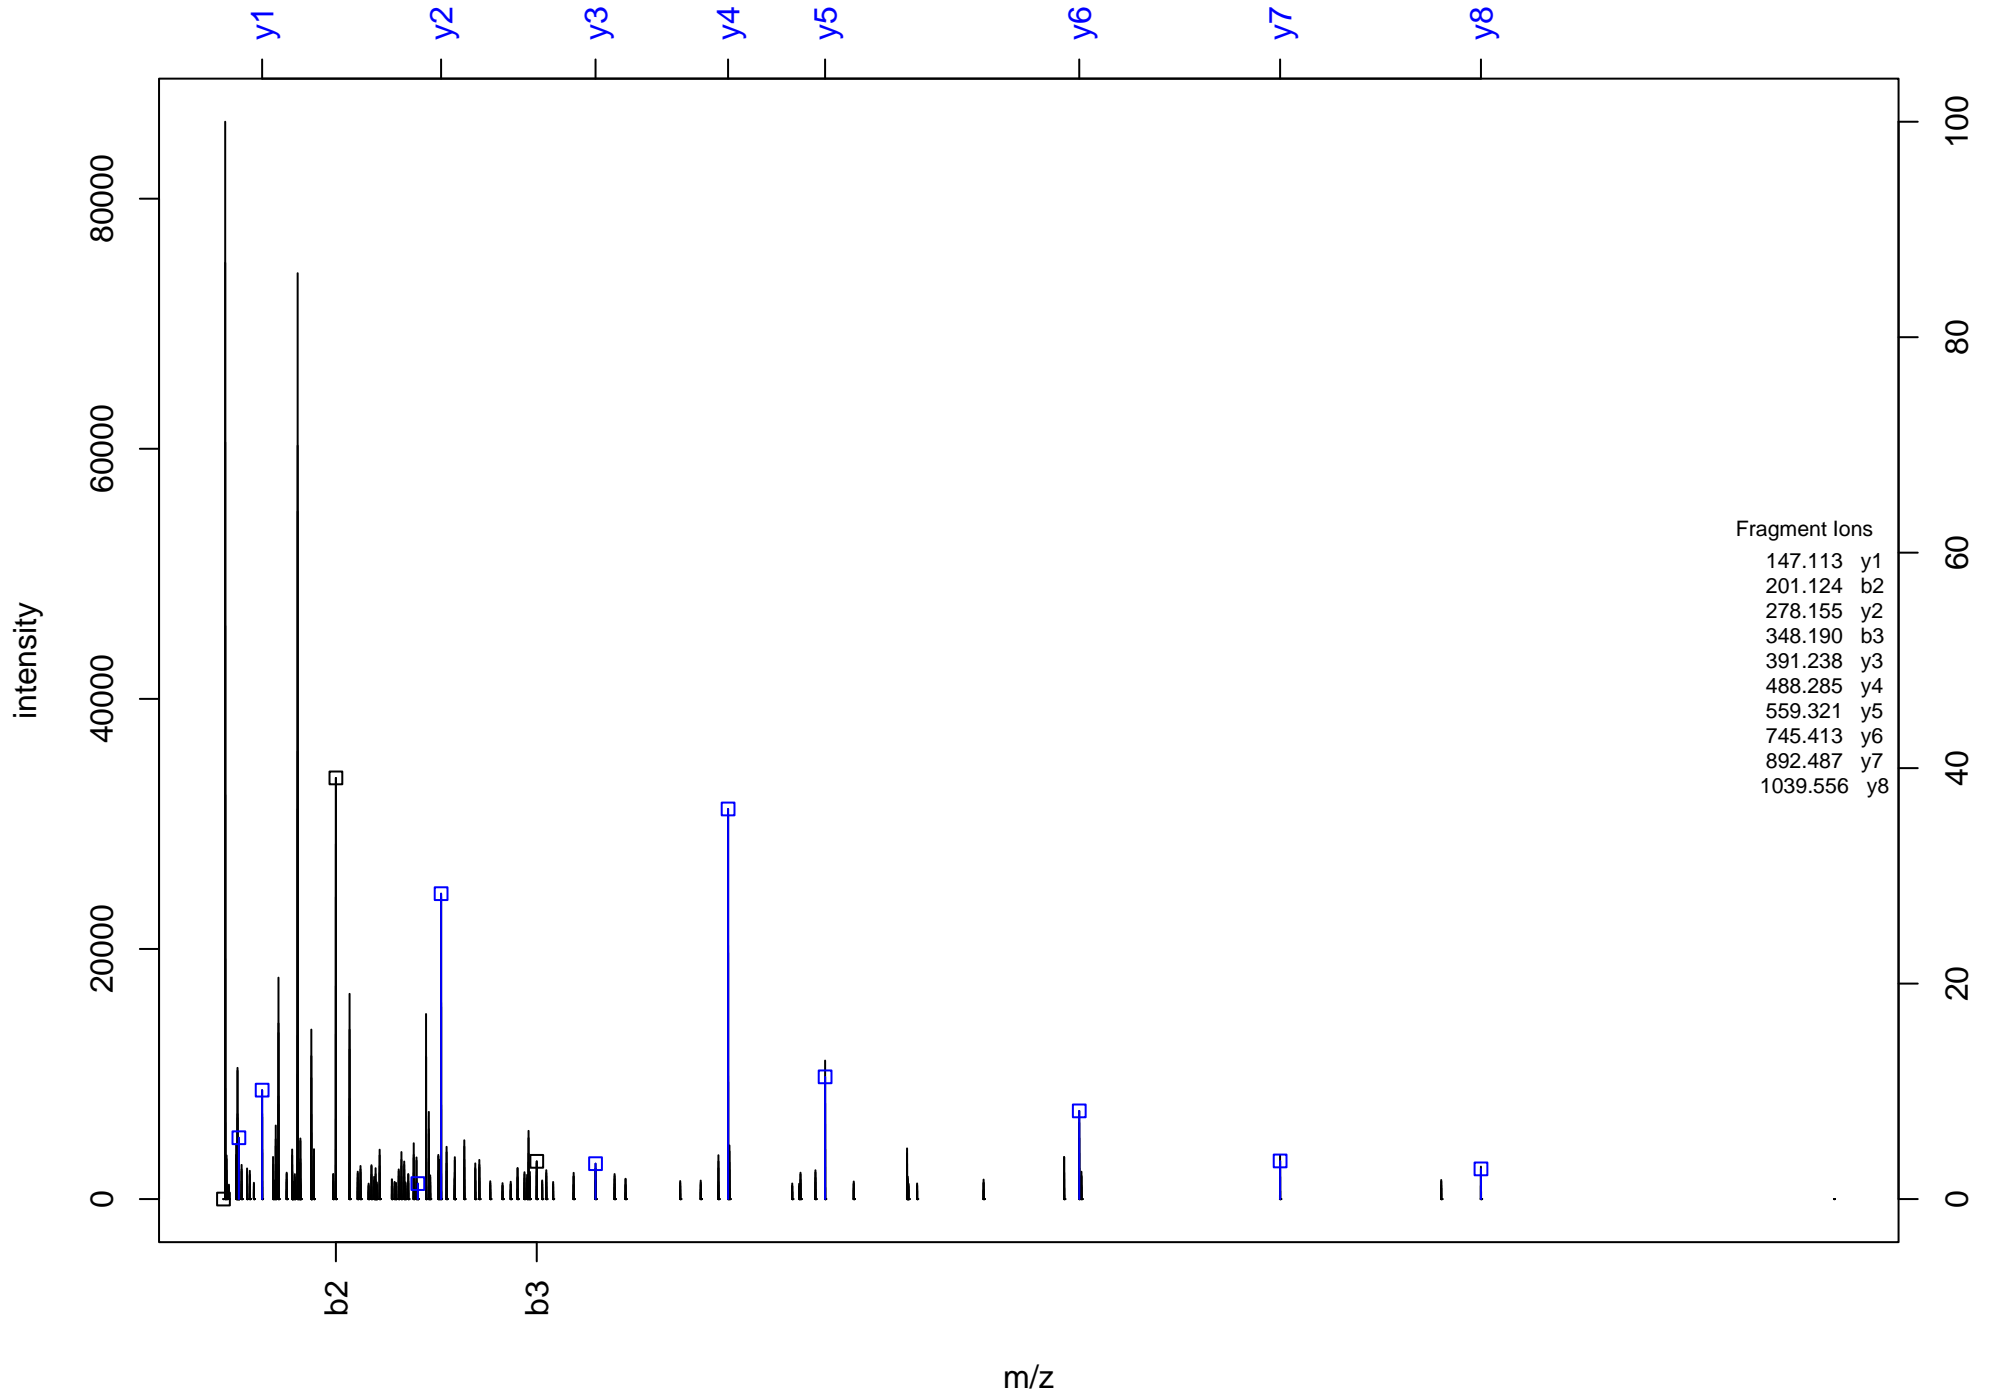

# ALVEDIISLEEVEDDMK

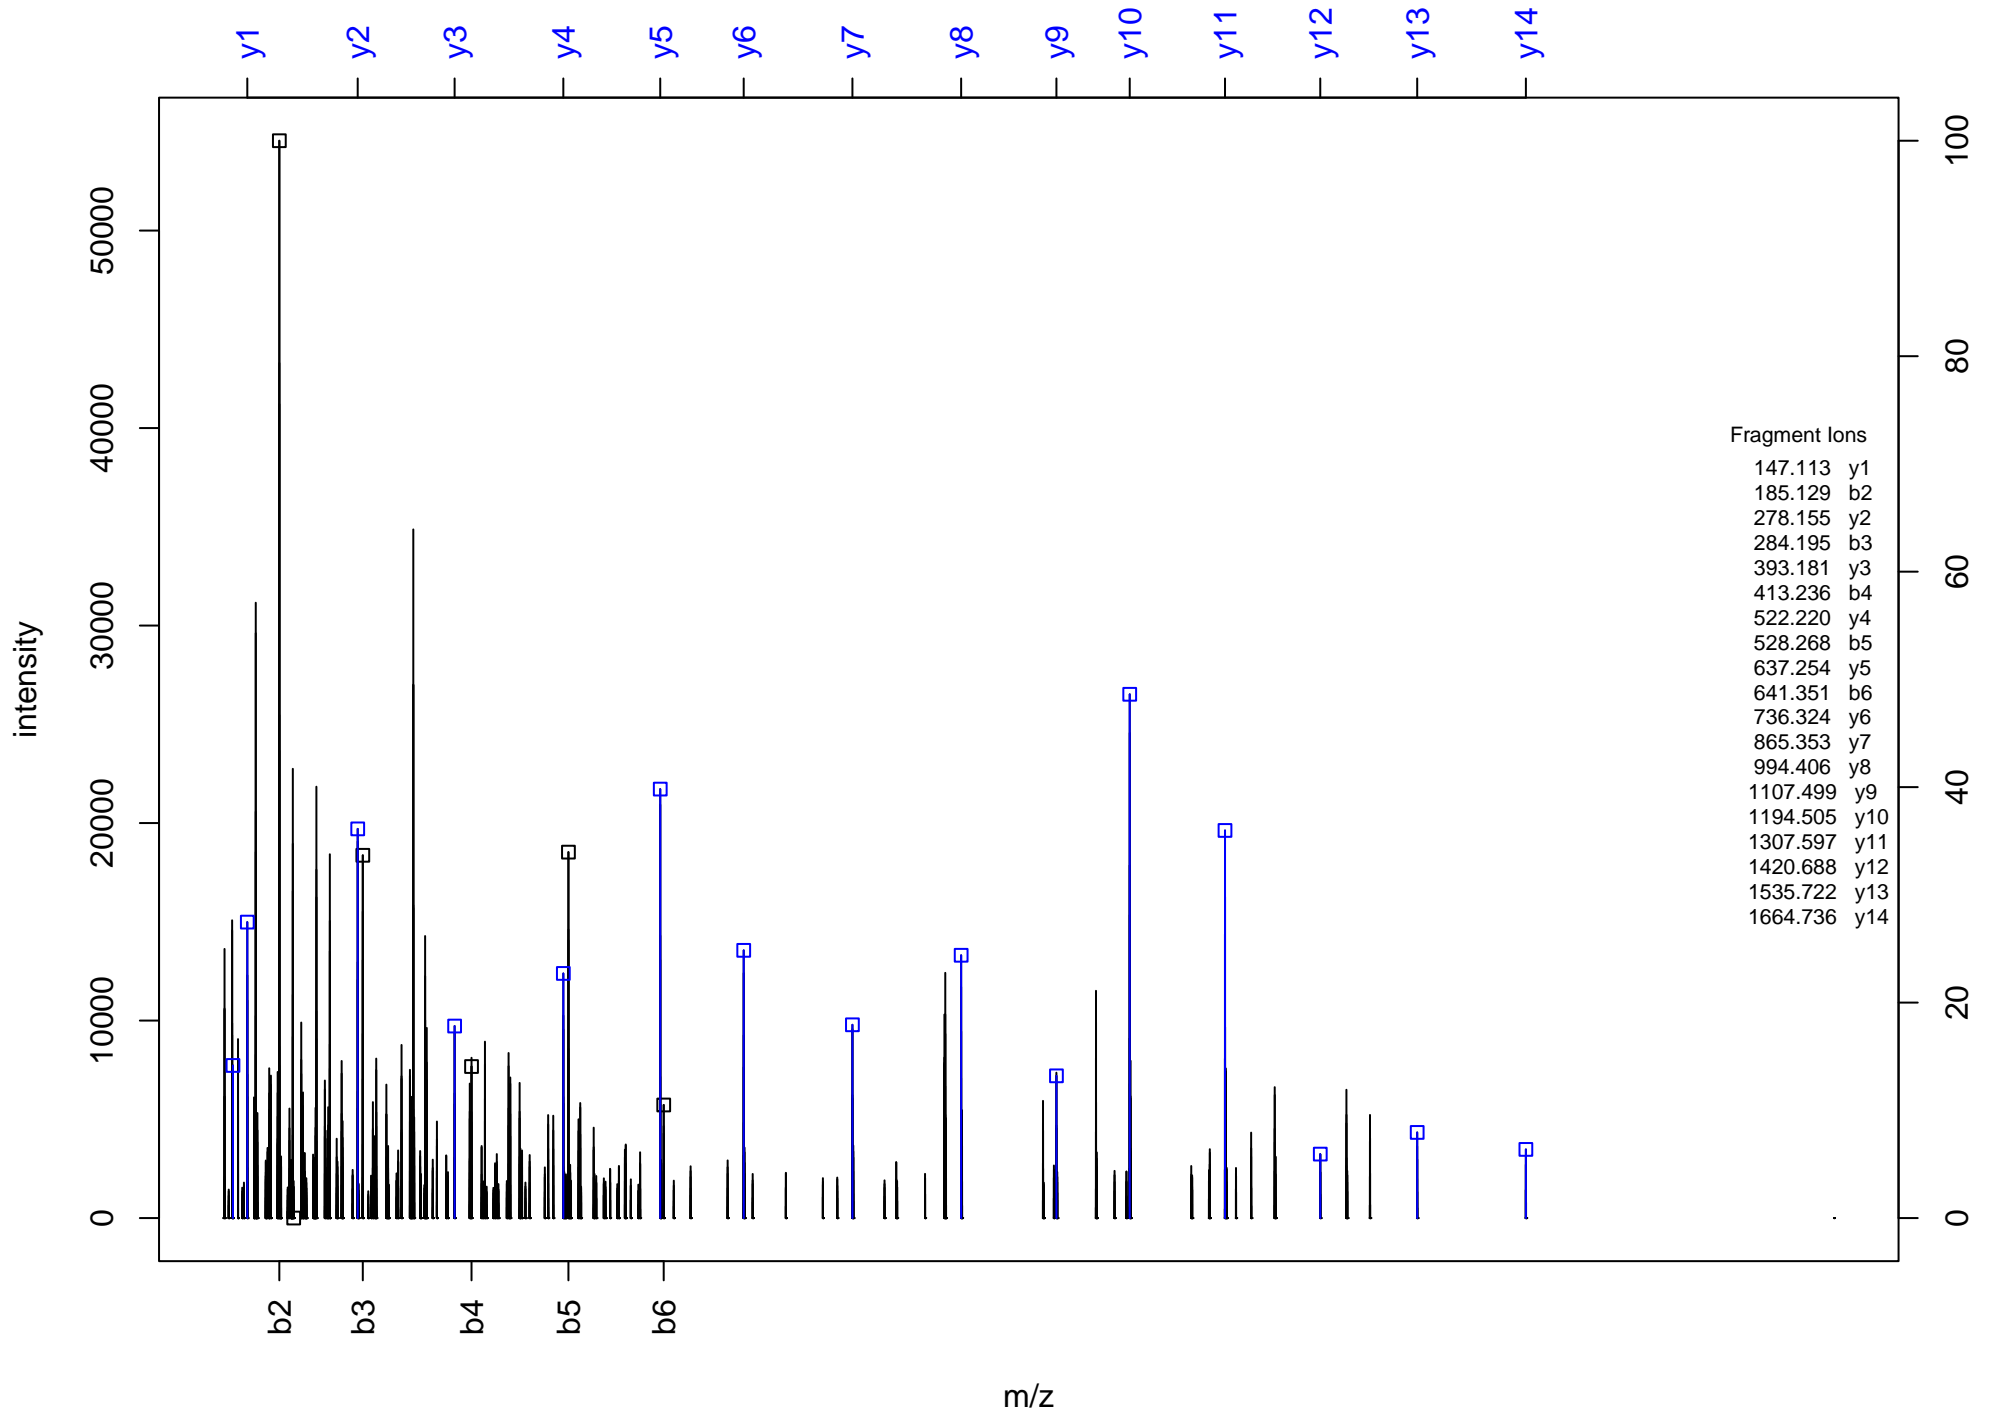

# LPQGLPTEETMSSTCLK

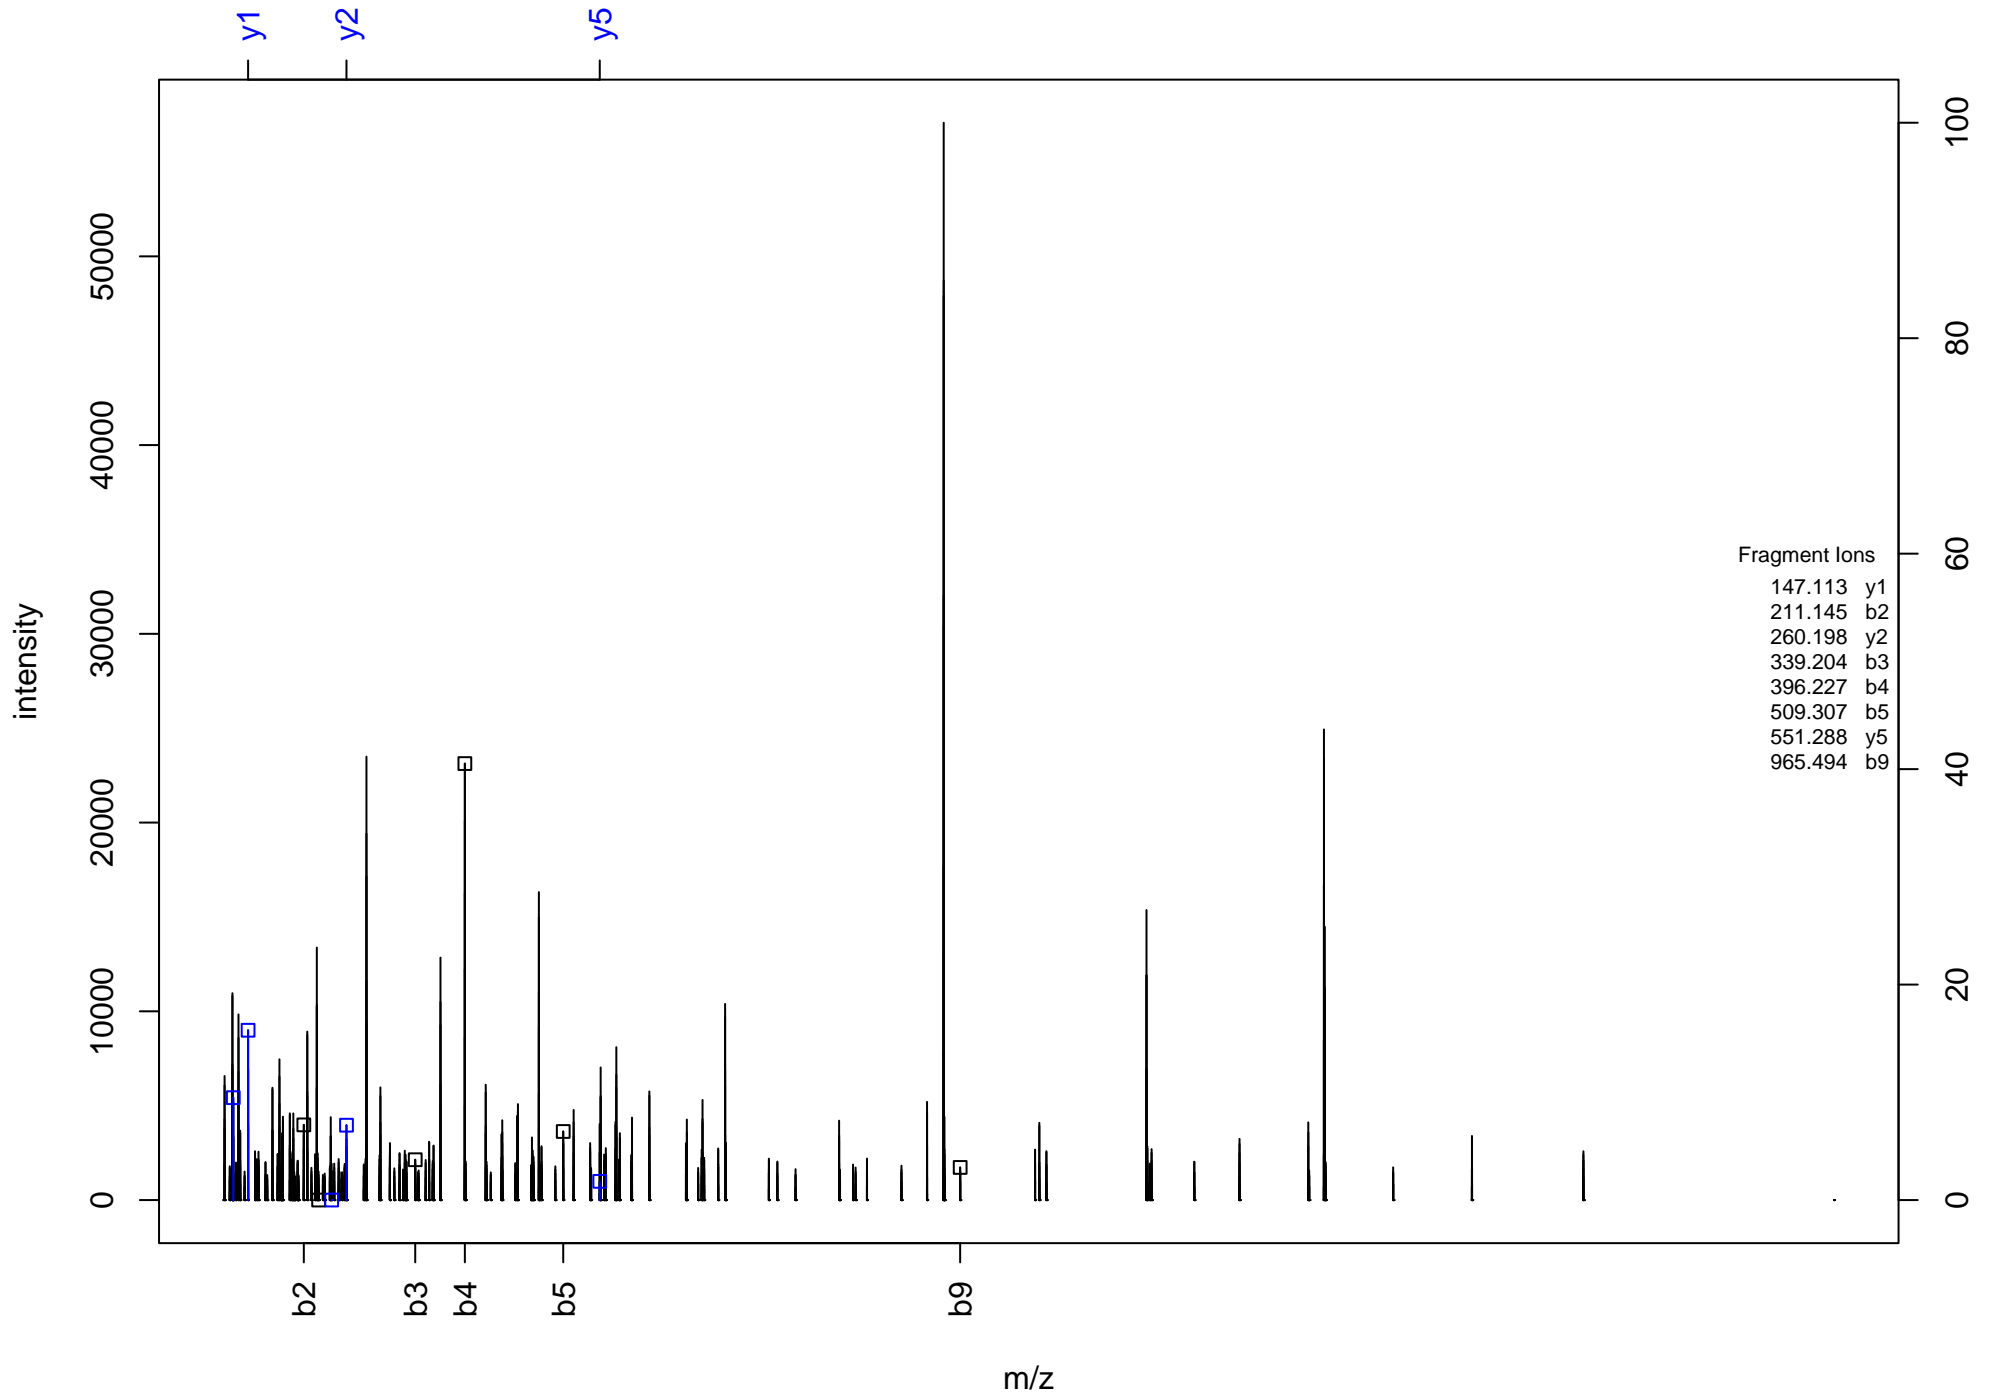



# (Ac)M\*SLPANQIK

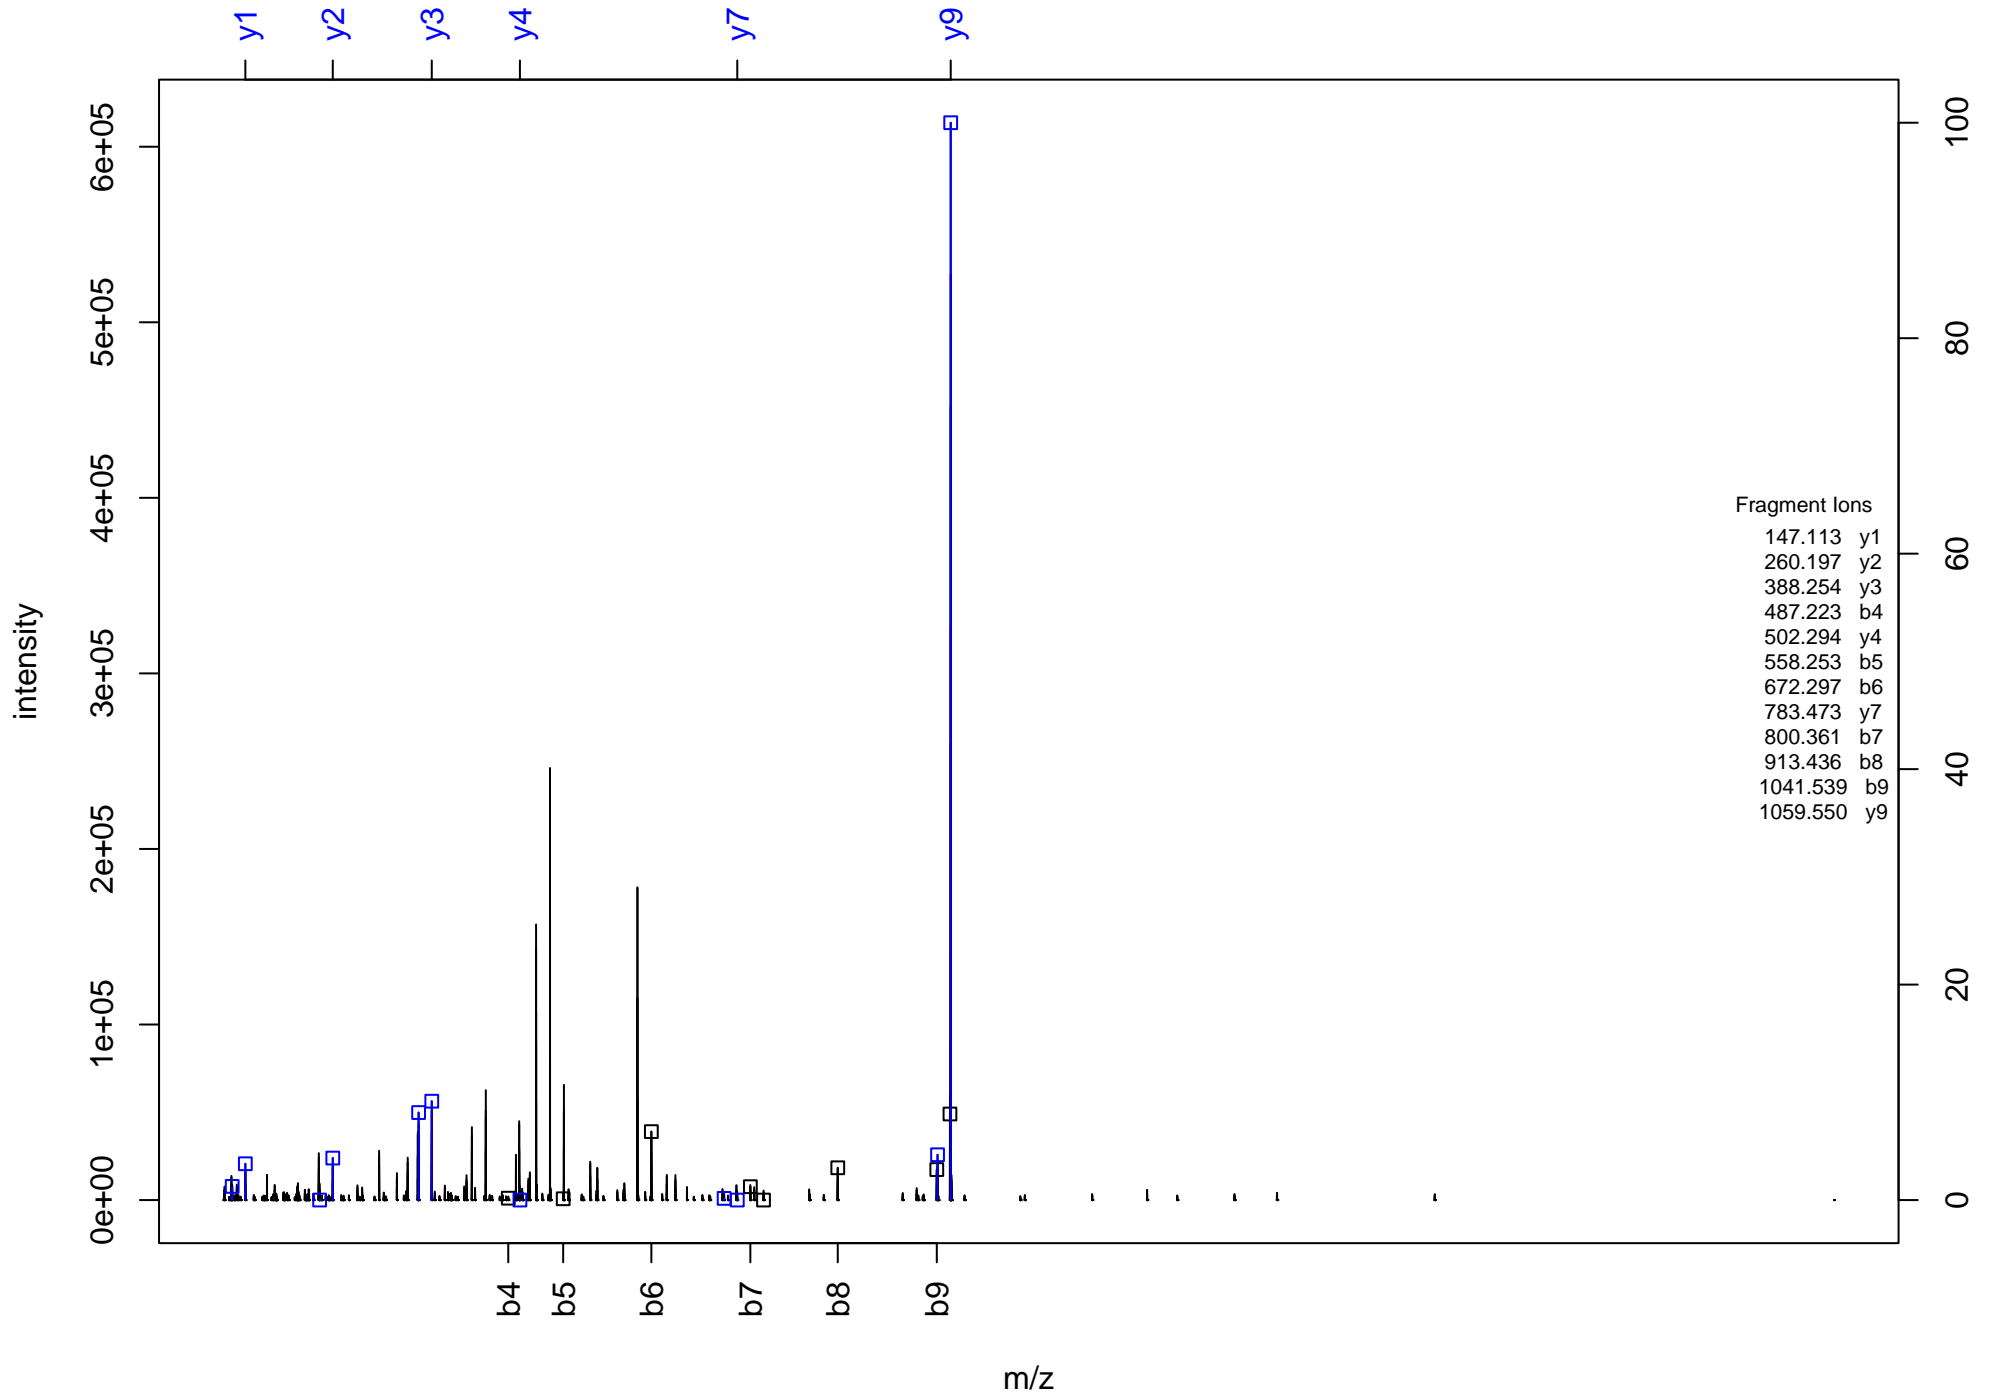

# (Ac)STNTDLSLSSYDEGQGSK

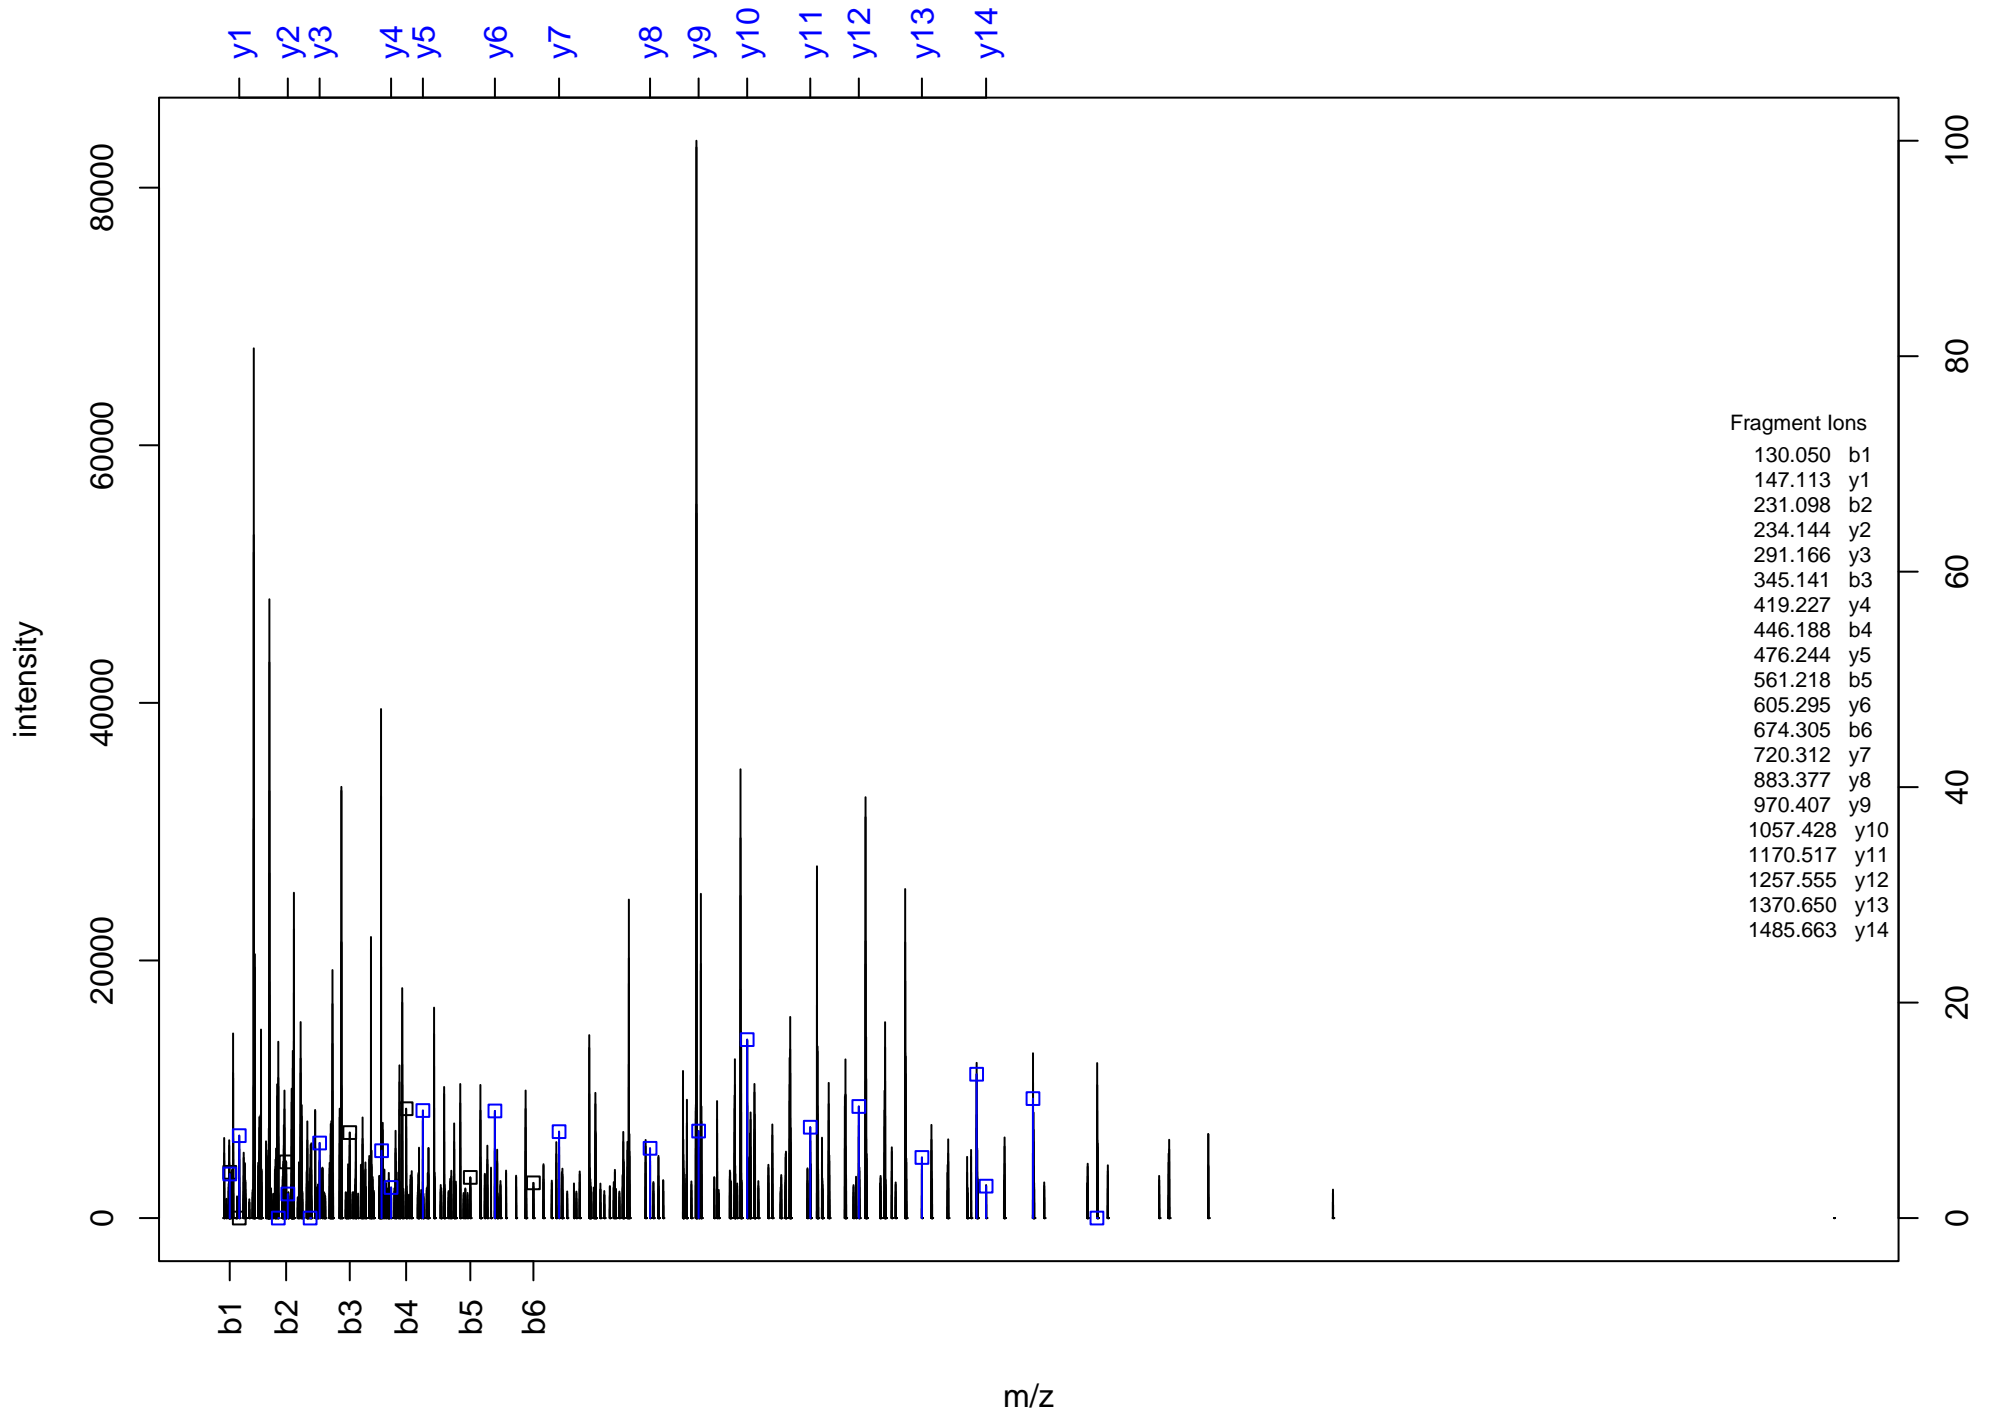

# (Ac)GAVTDDEVIRK

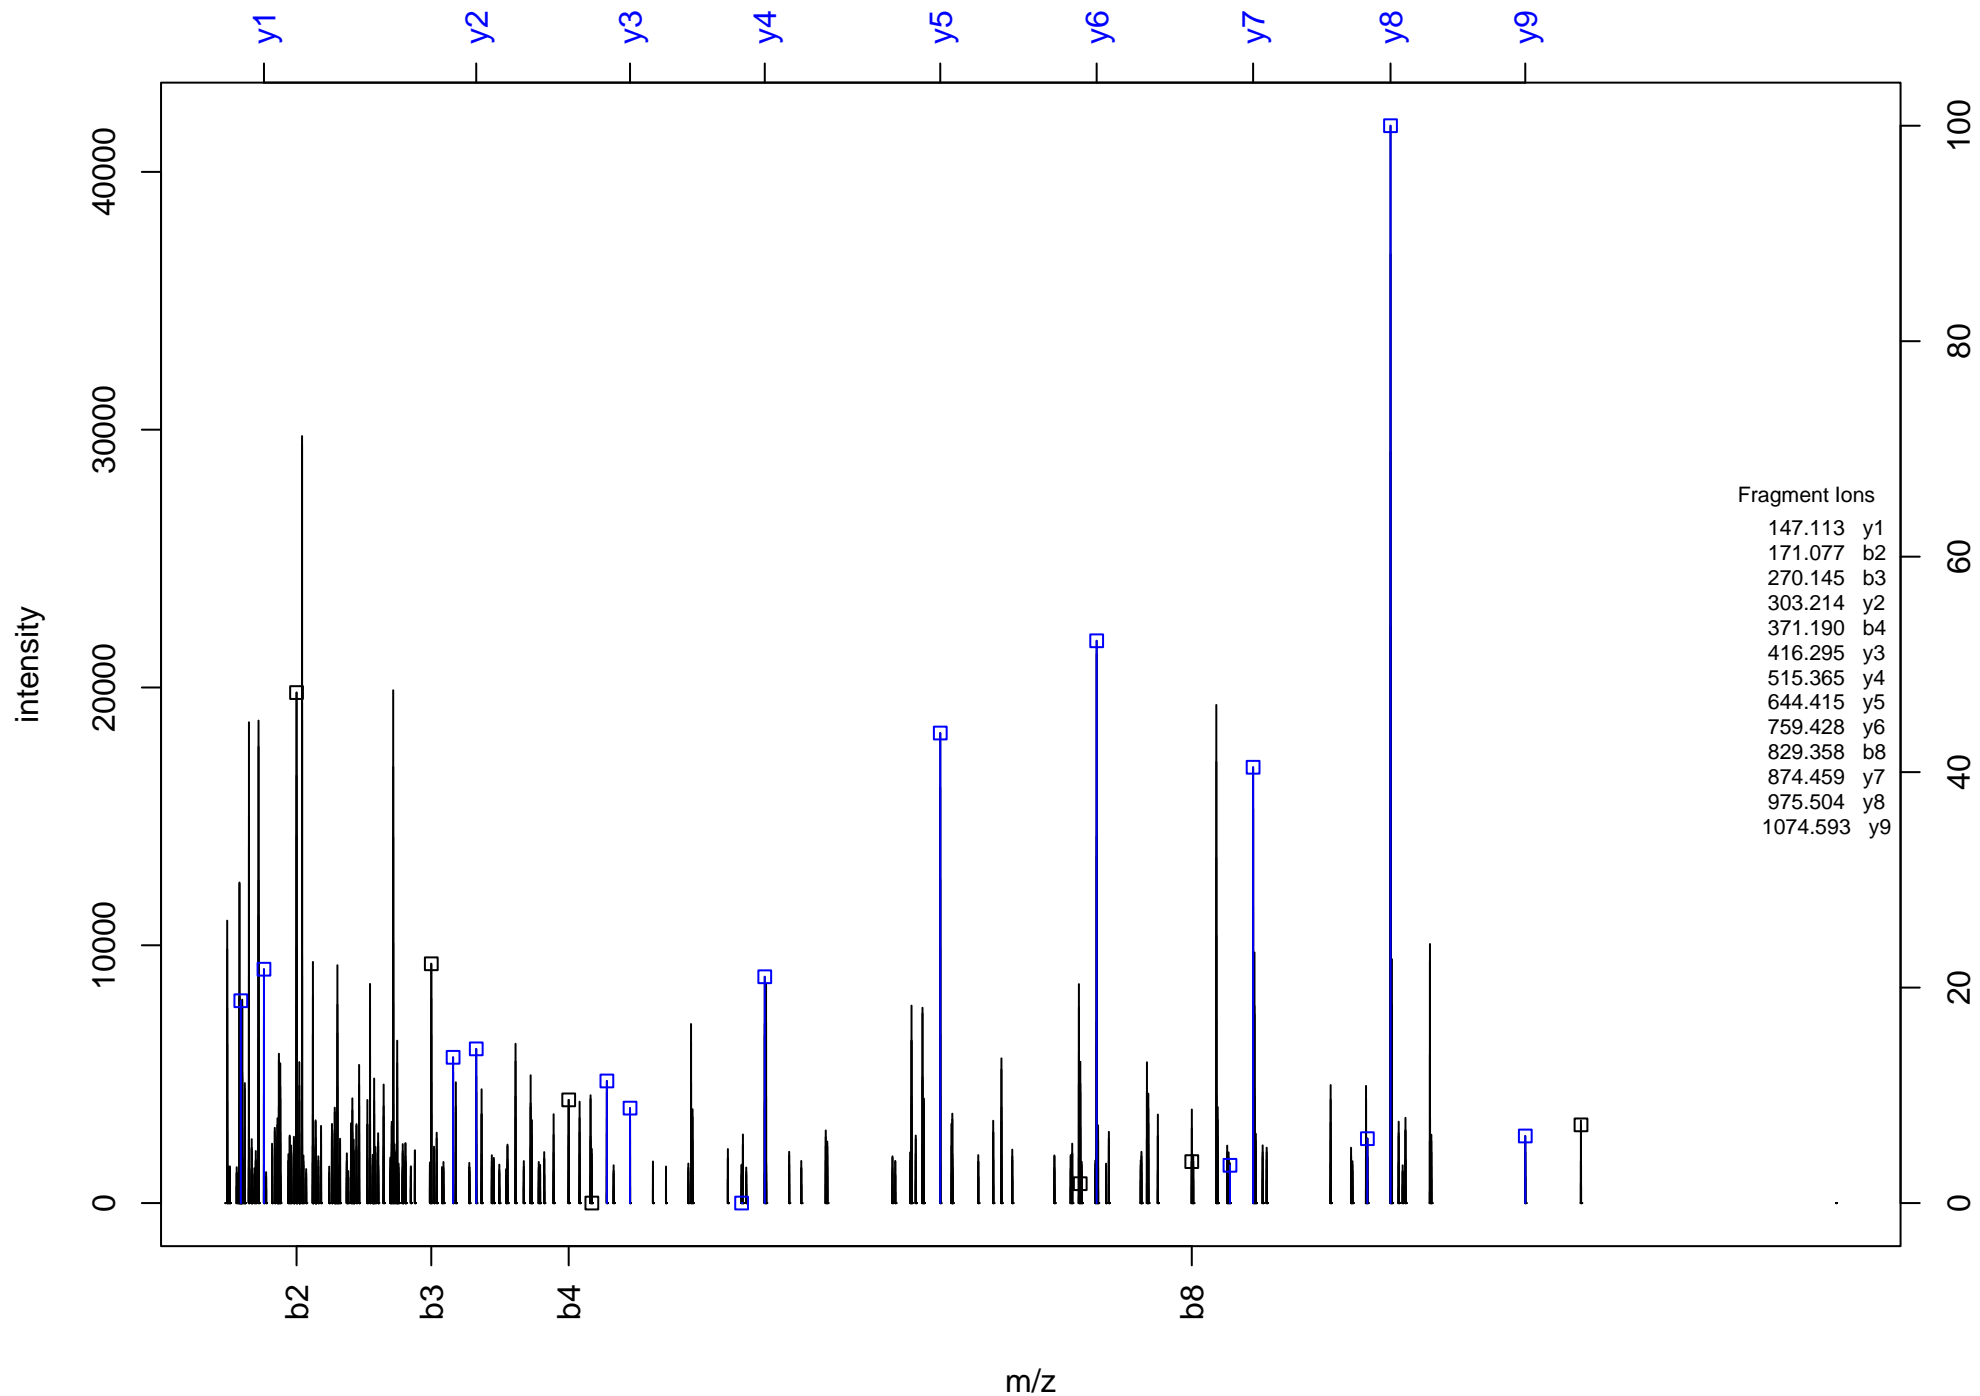

# IIEGTYGVVYR

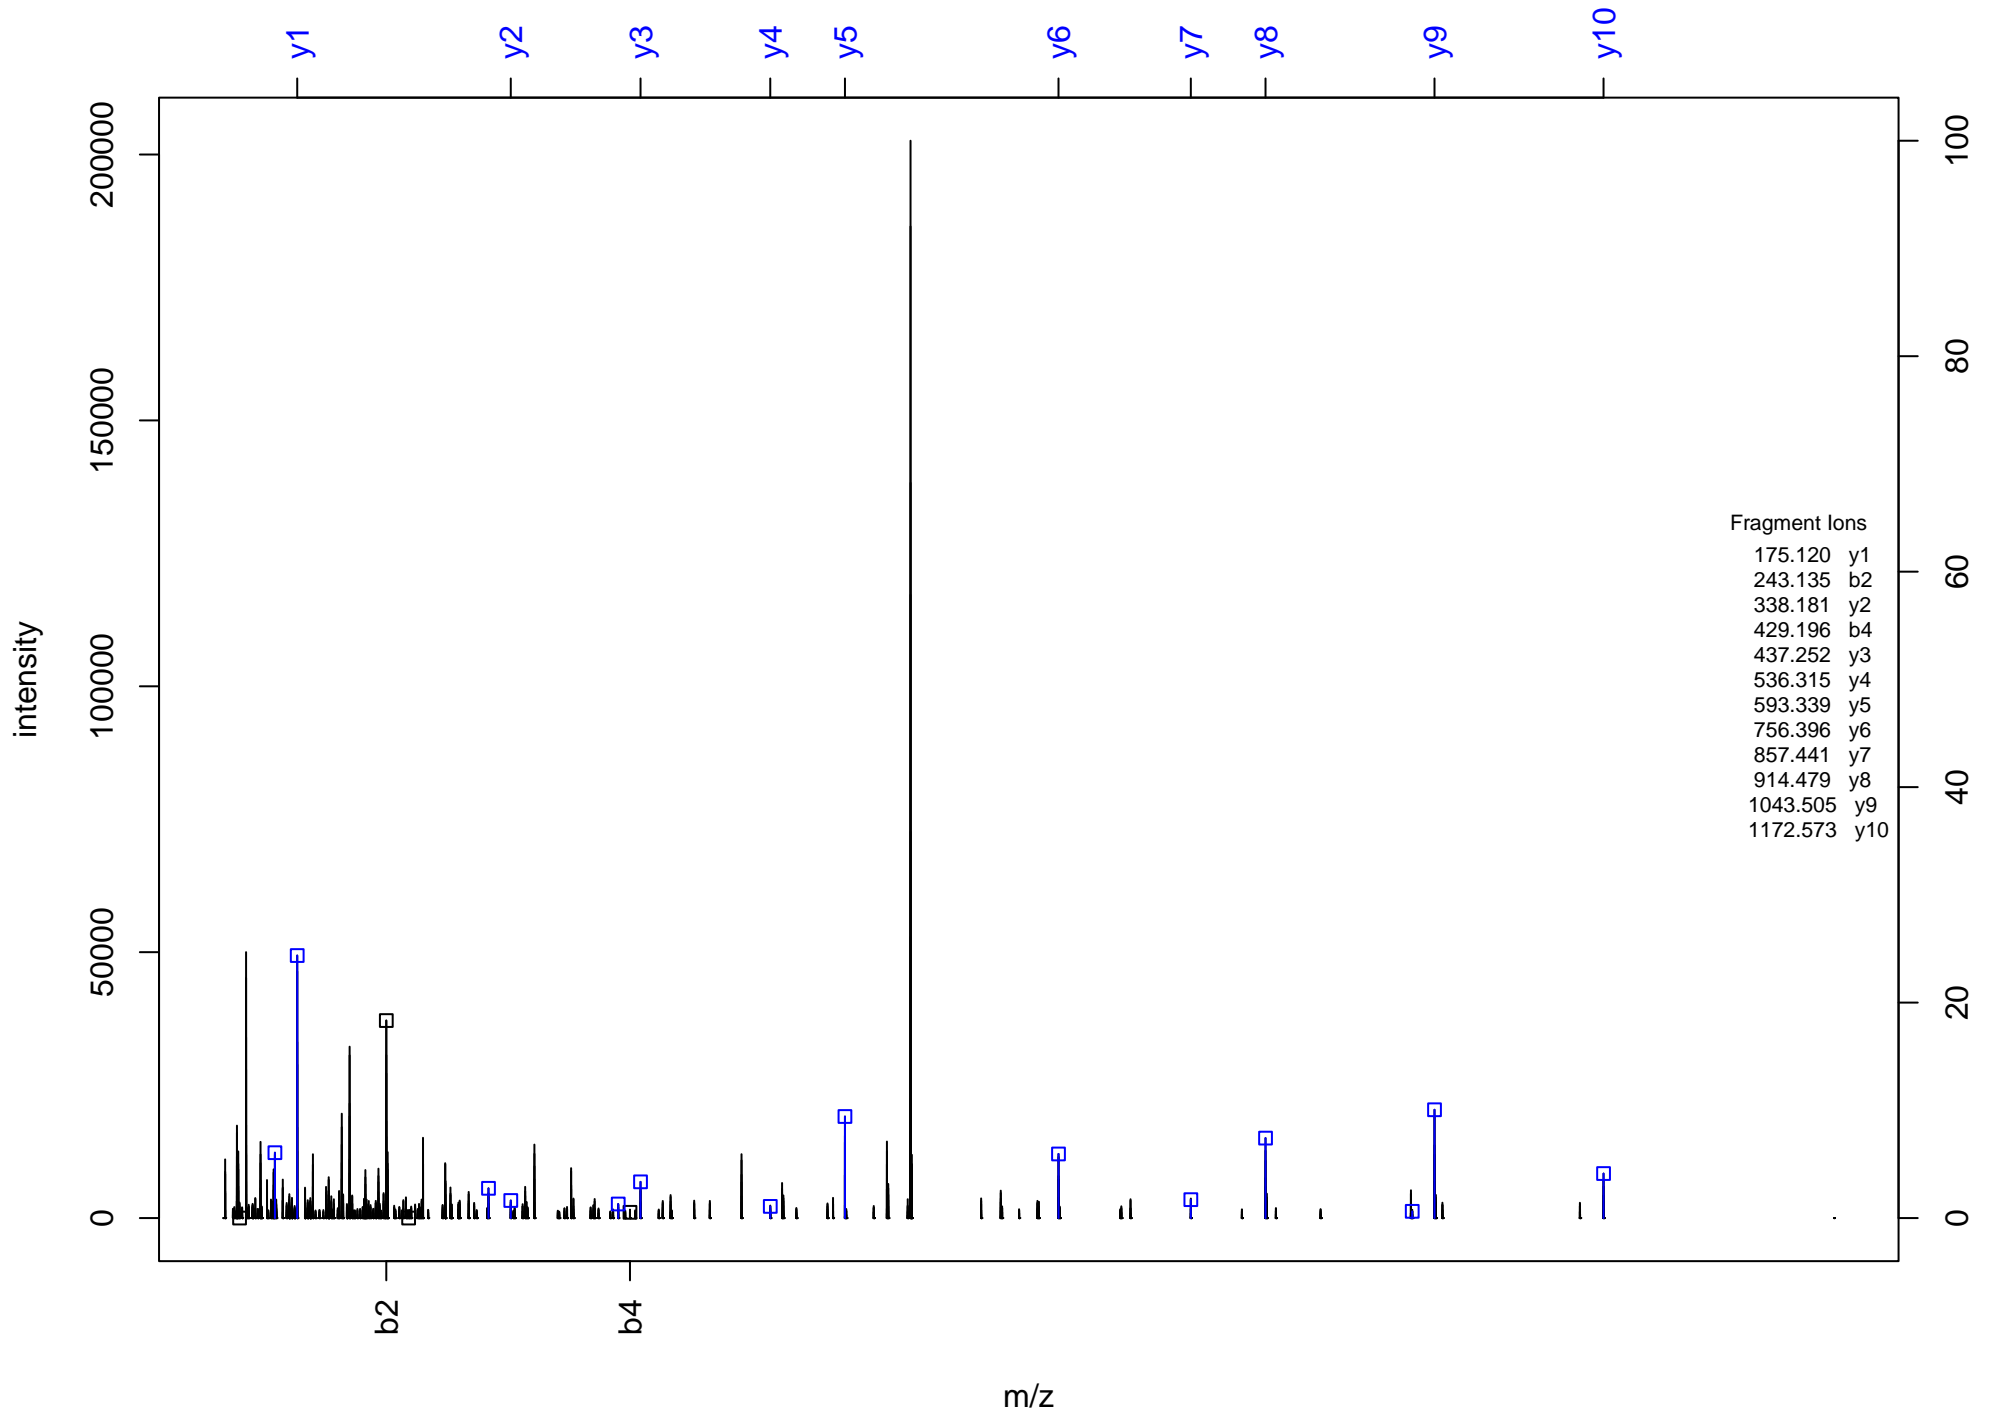

# LM\*Q^GDQ^ILMVN^GEDVR

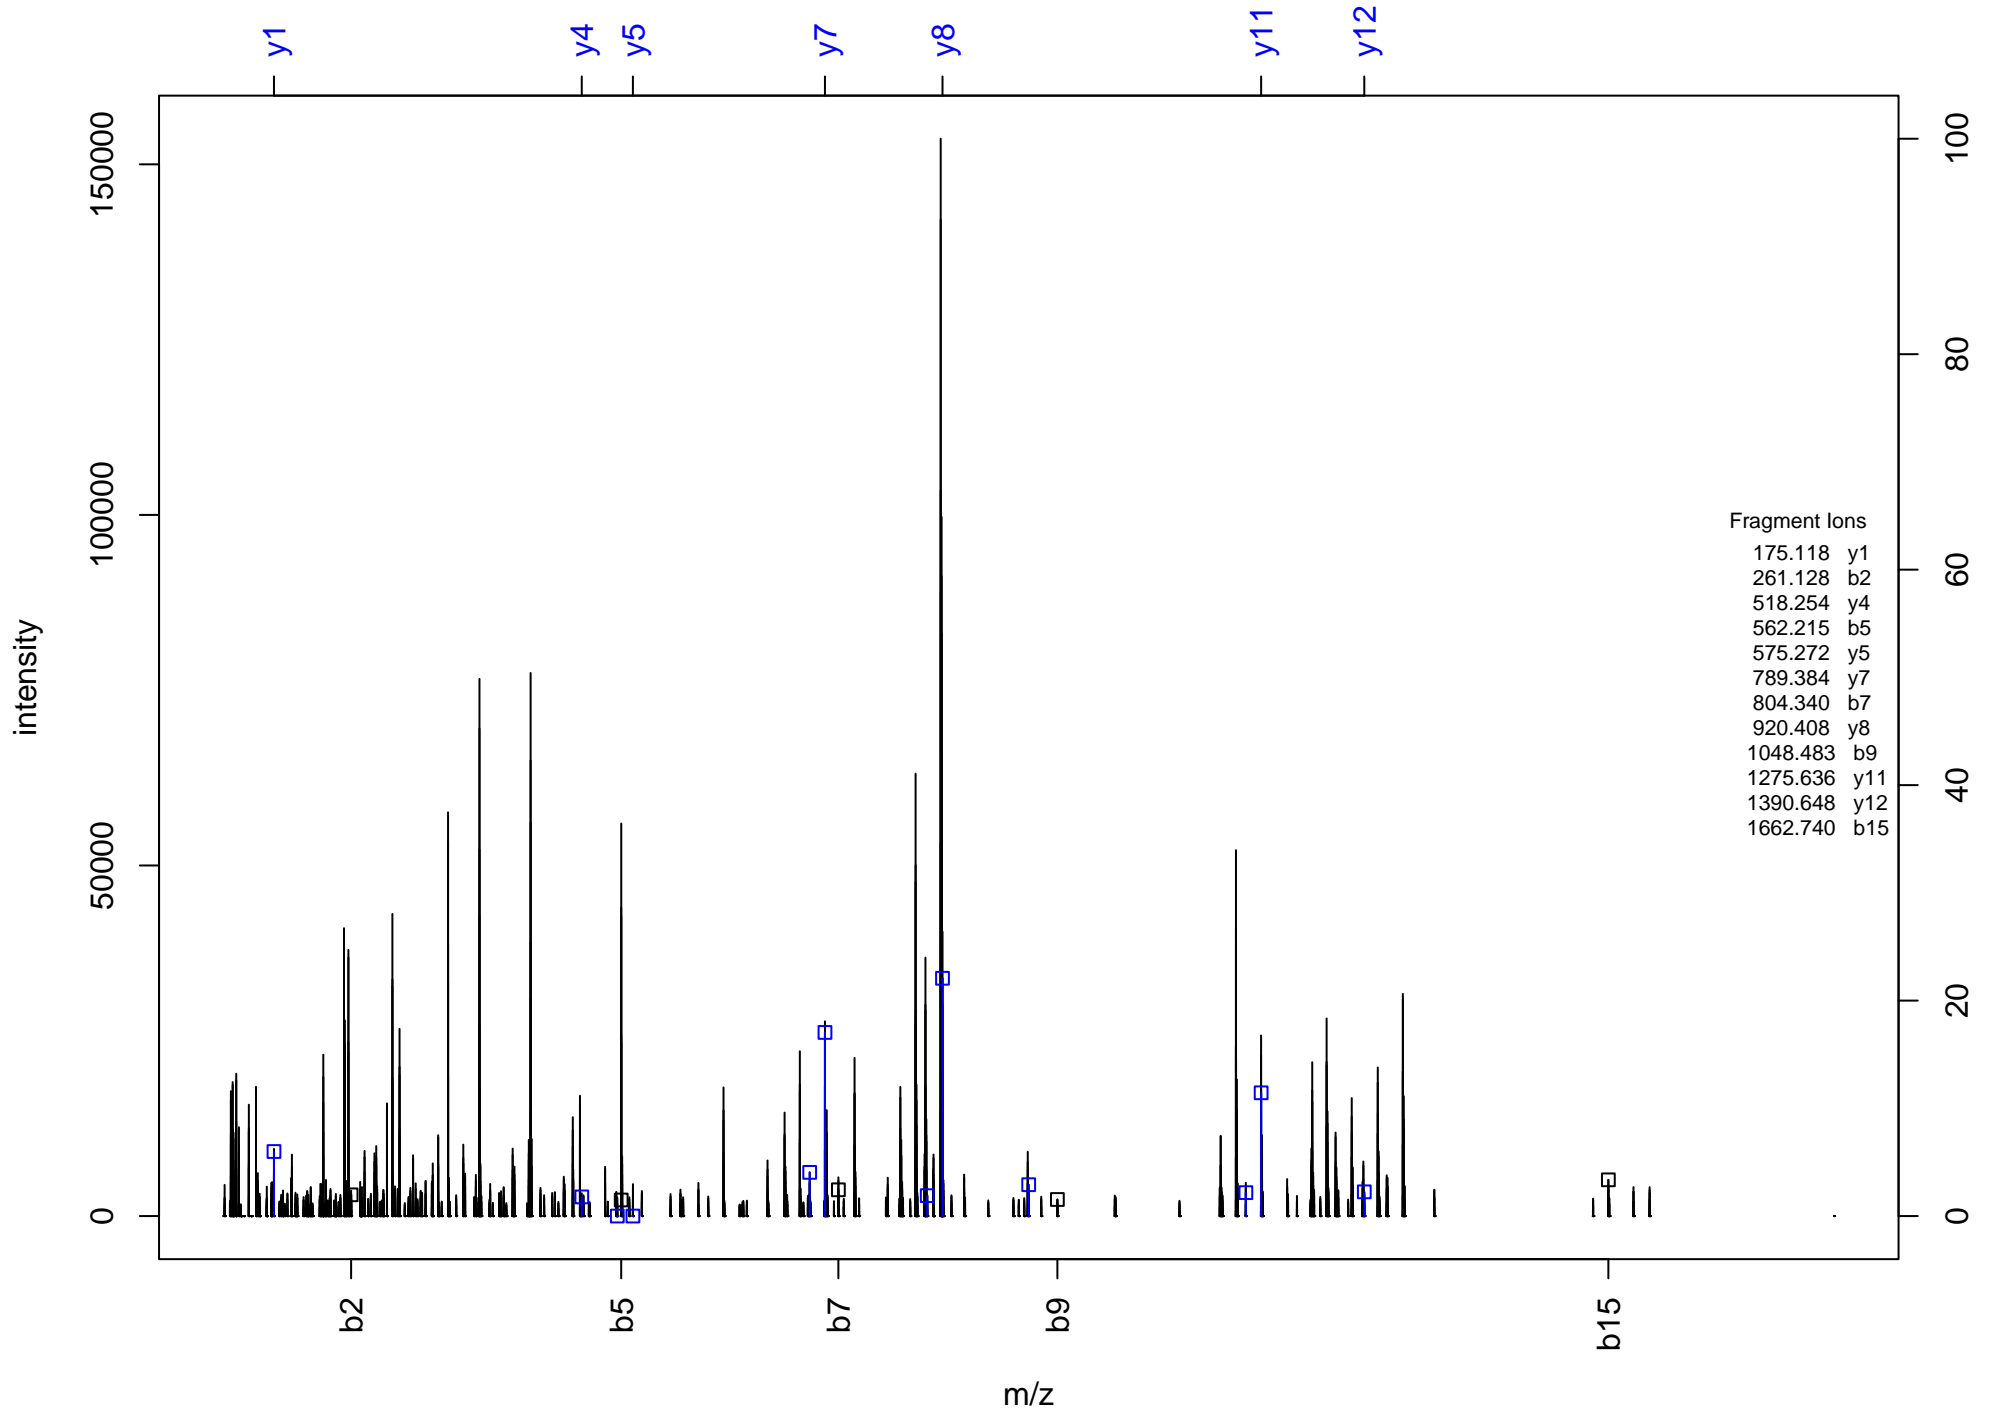

# HLQ<sup>+</sup>IN<sup>+</sup>Q<sup>+</sup>R

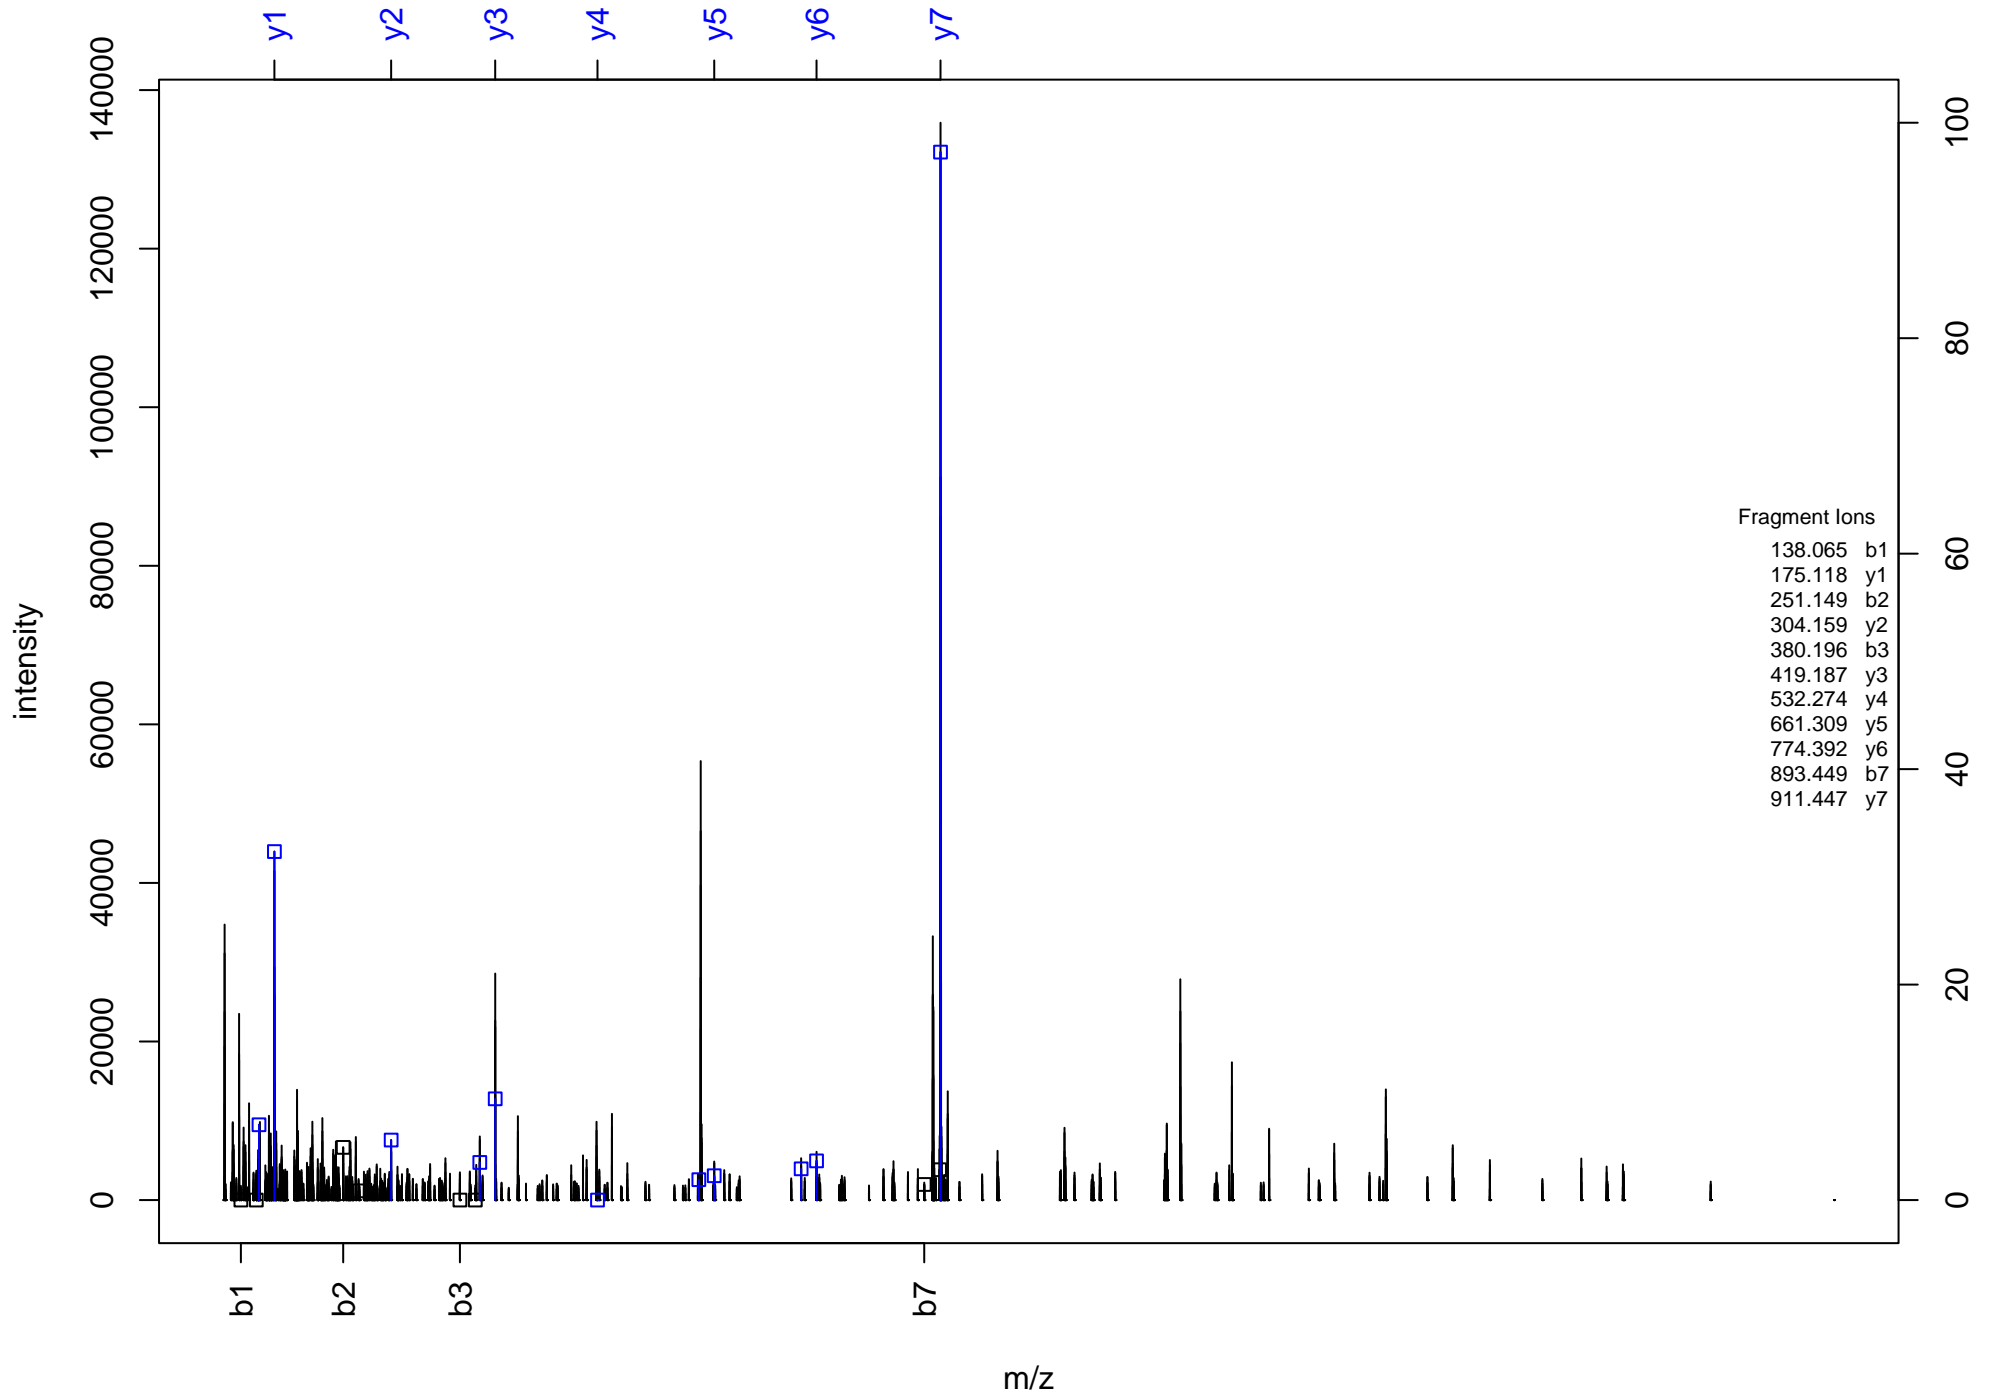

# ISARN^TKQ^VQ^K

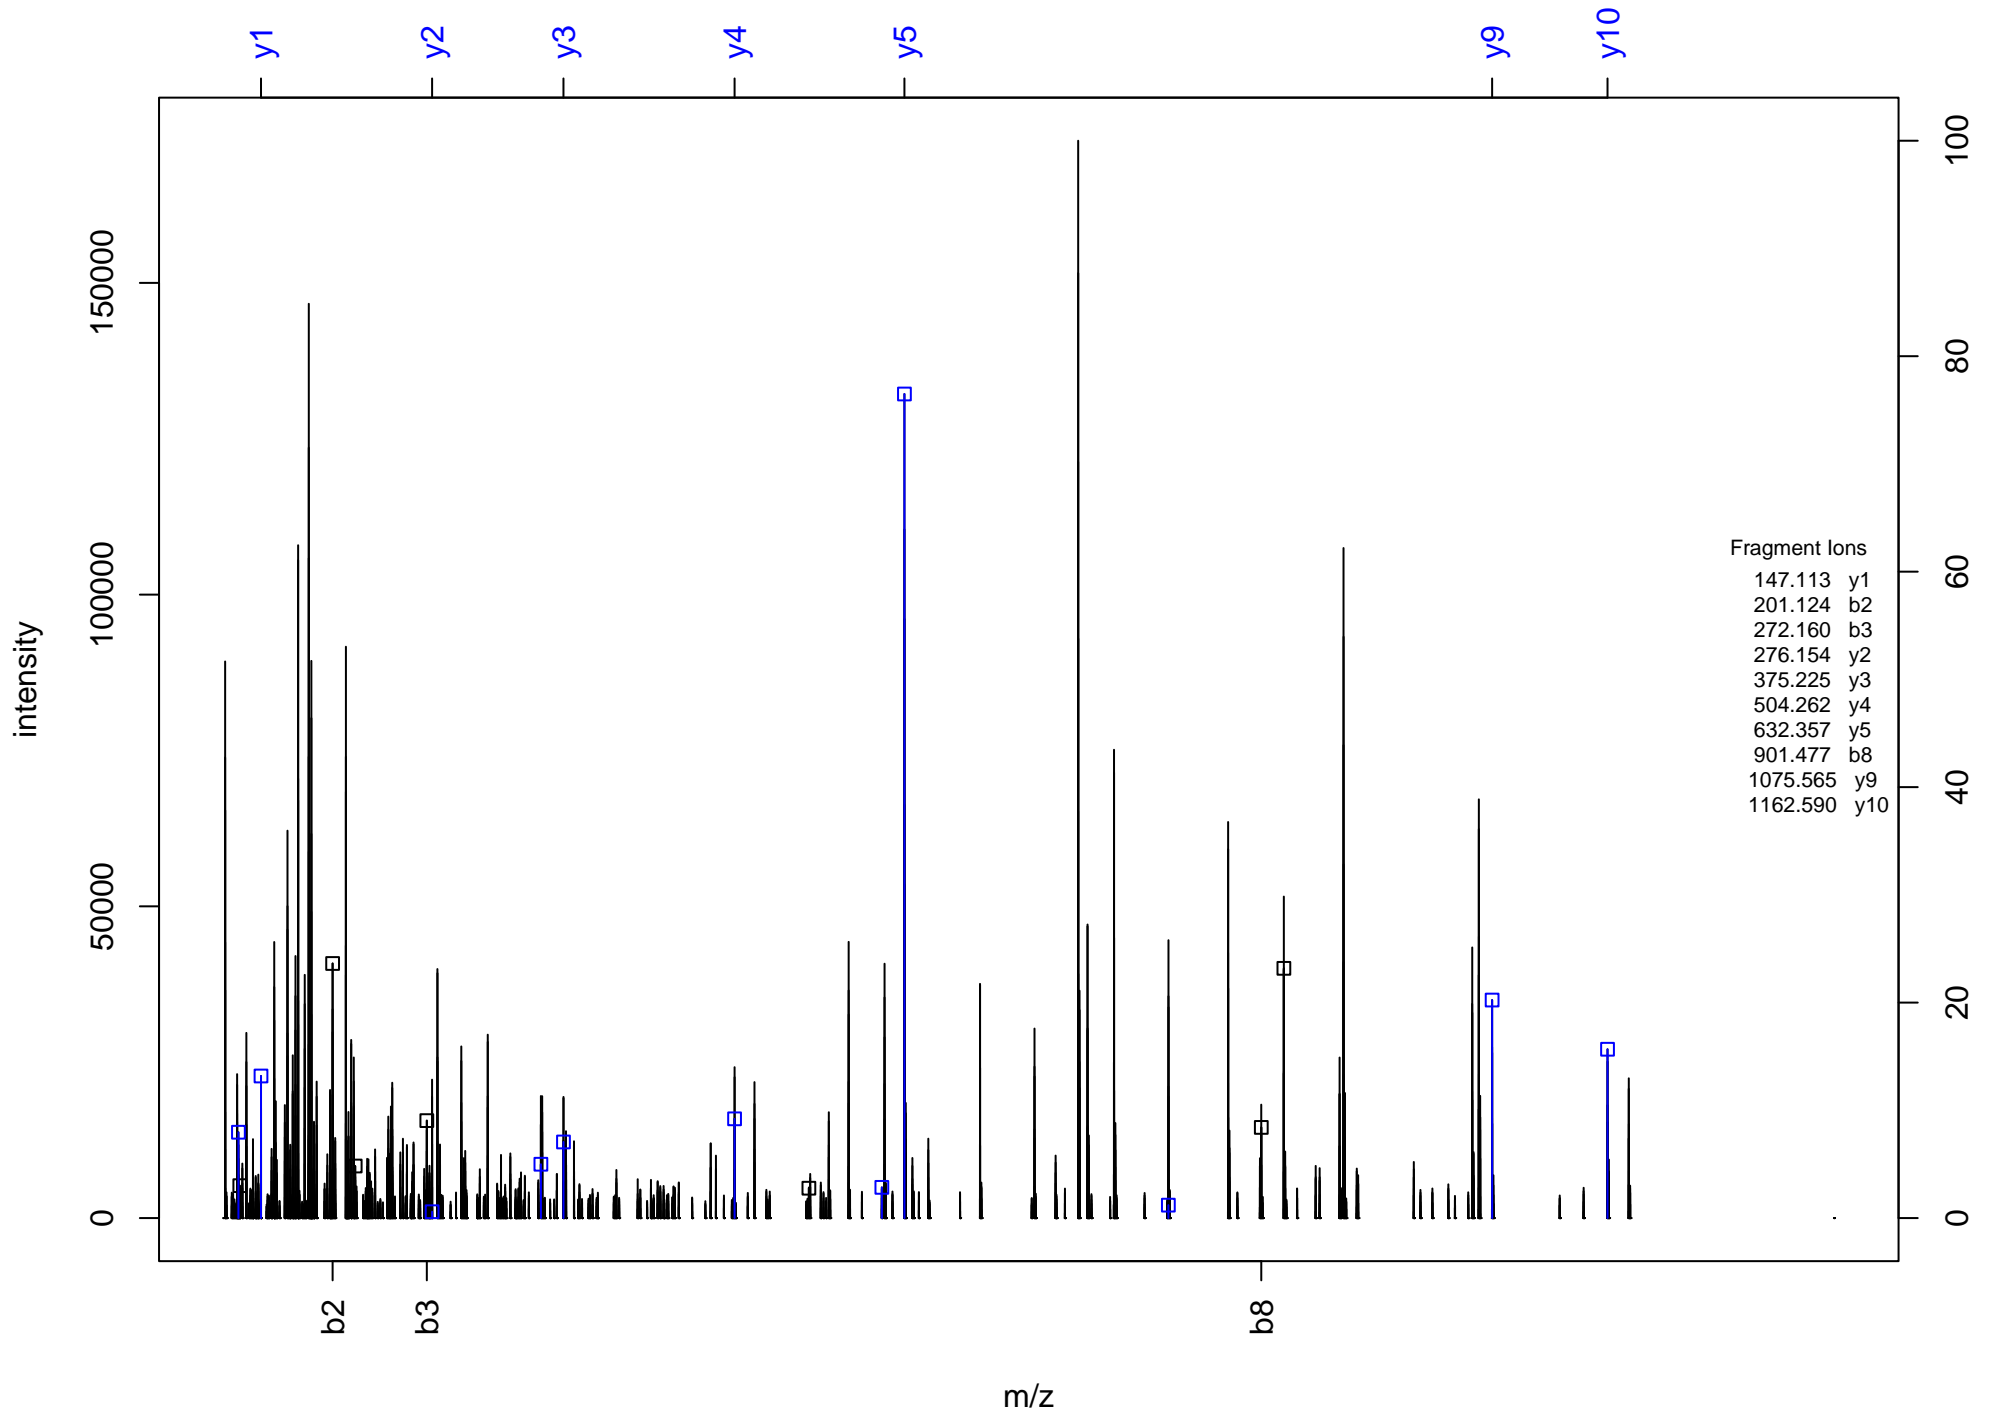

# APPNATLEHFYQTSGK

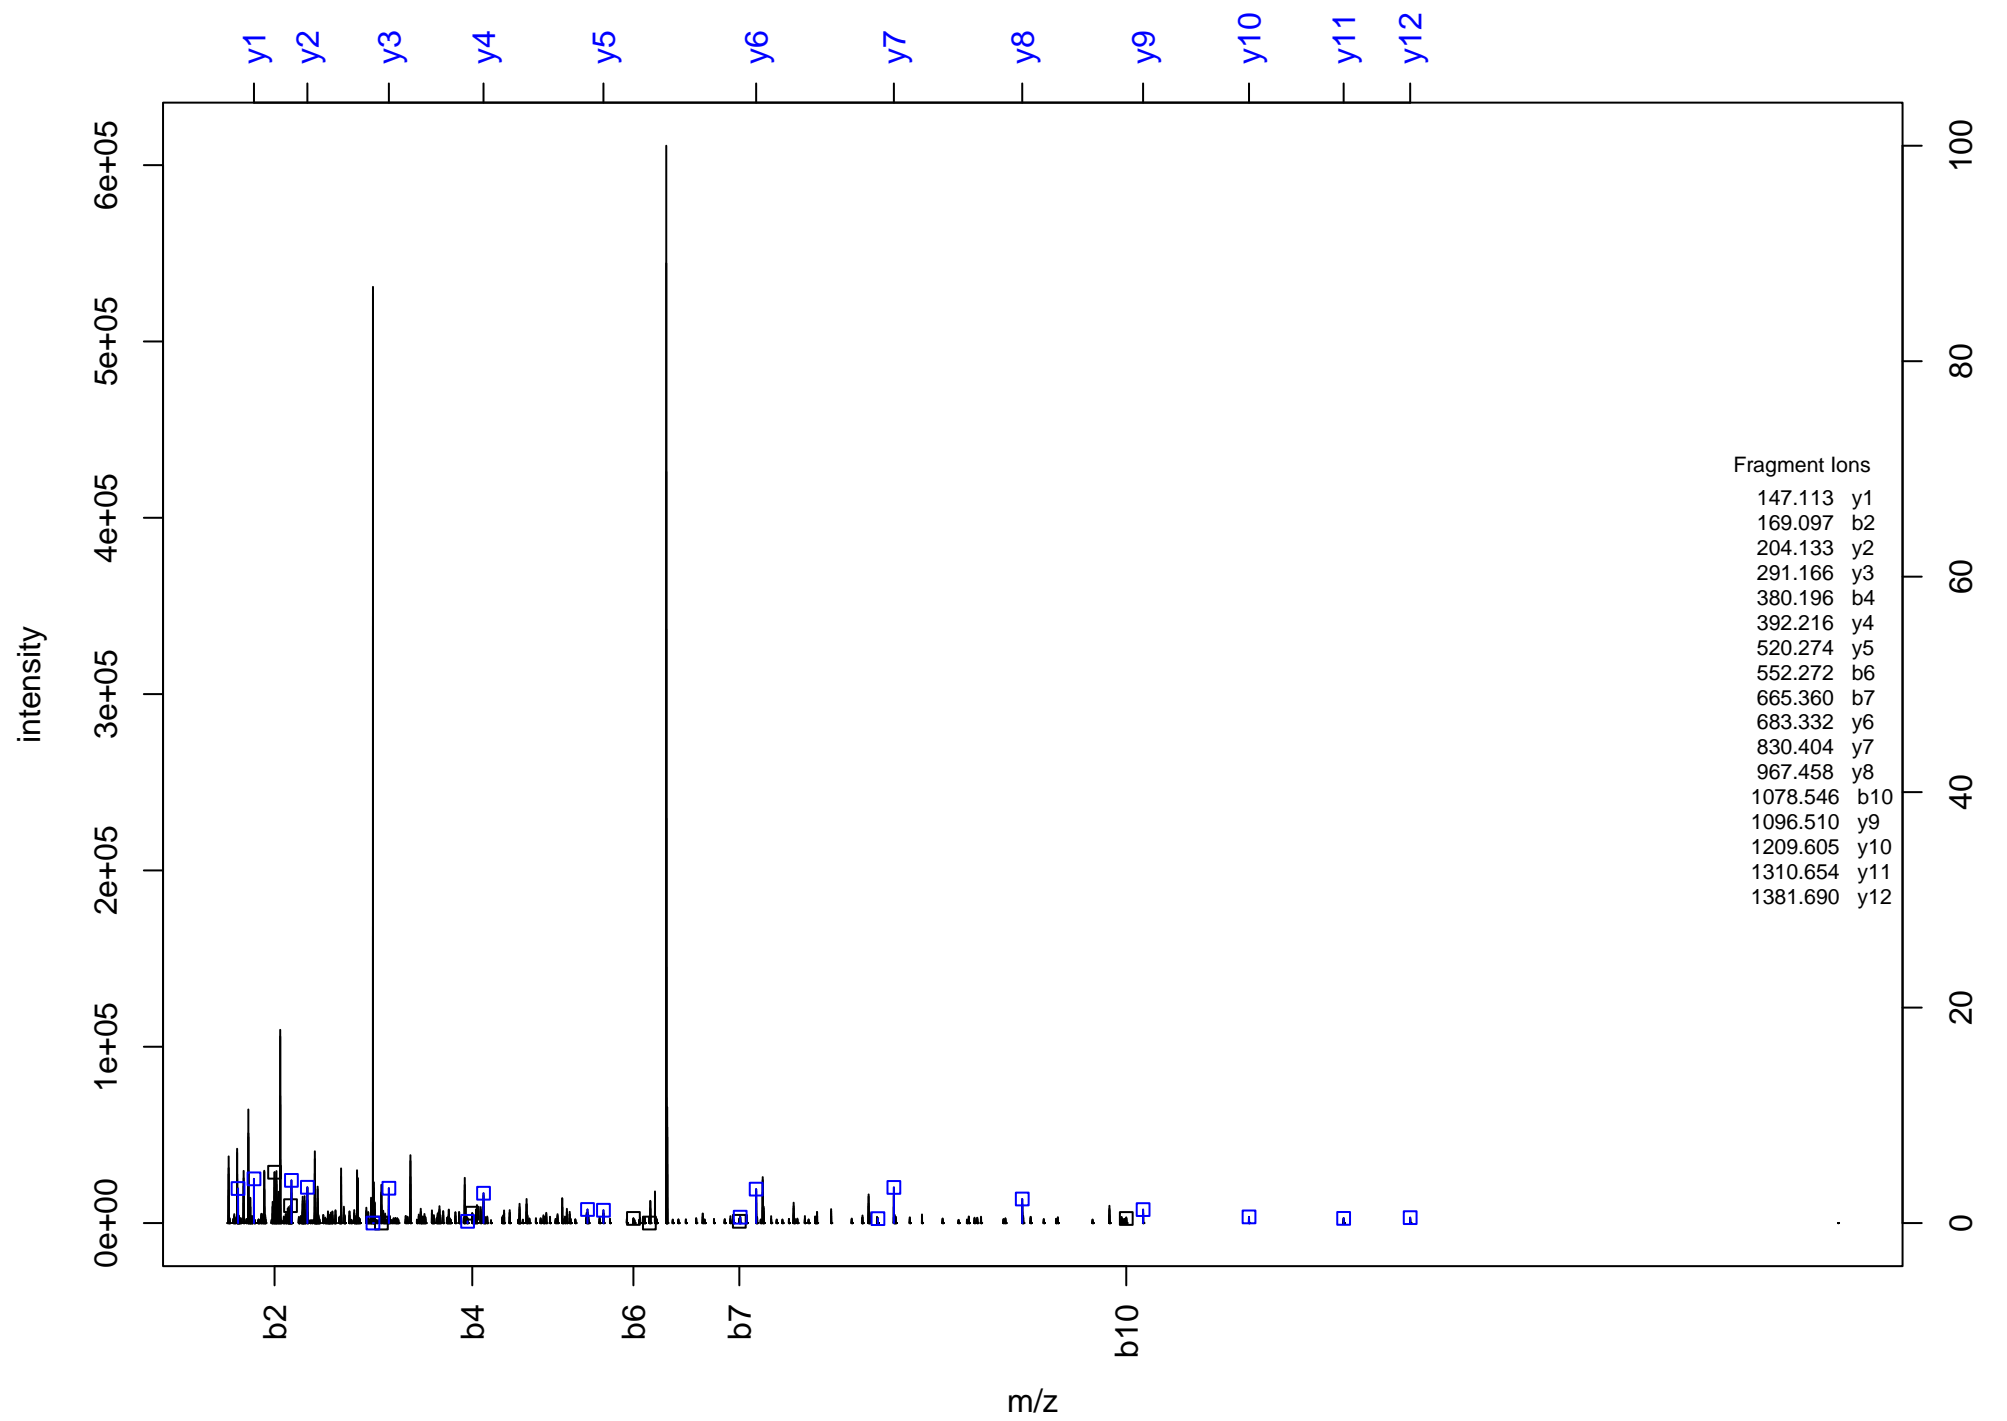



# TM\*LDM\*N^KMTQSIIGSM\*QYSK

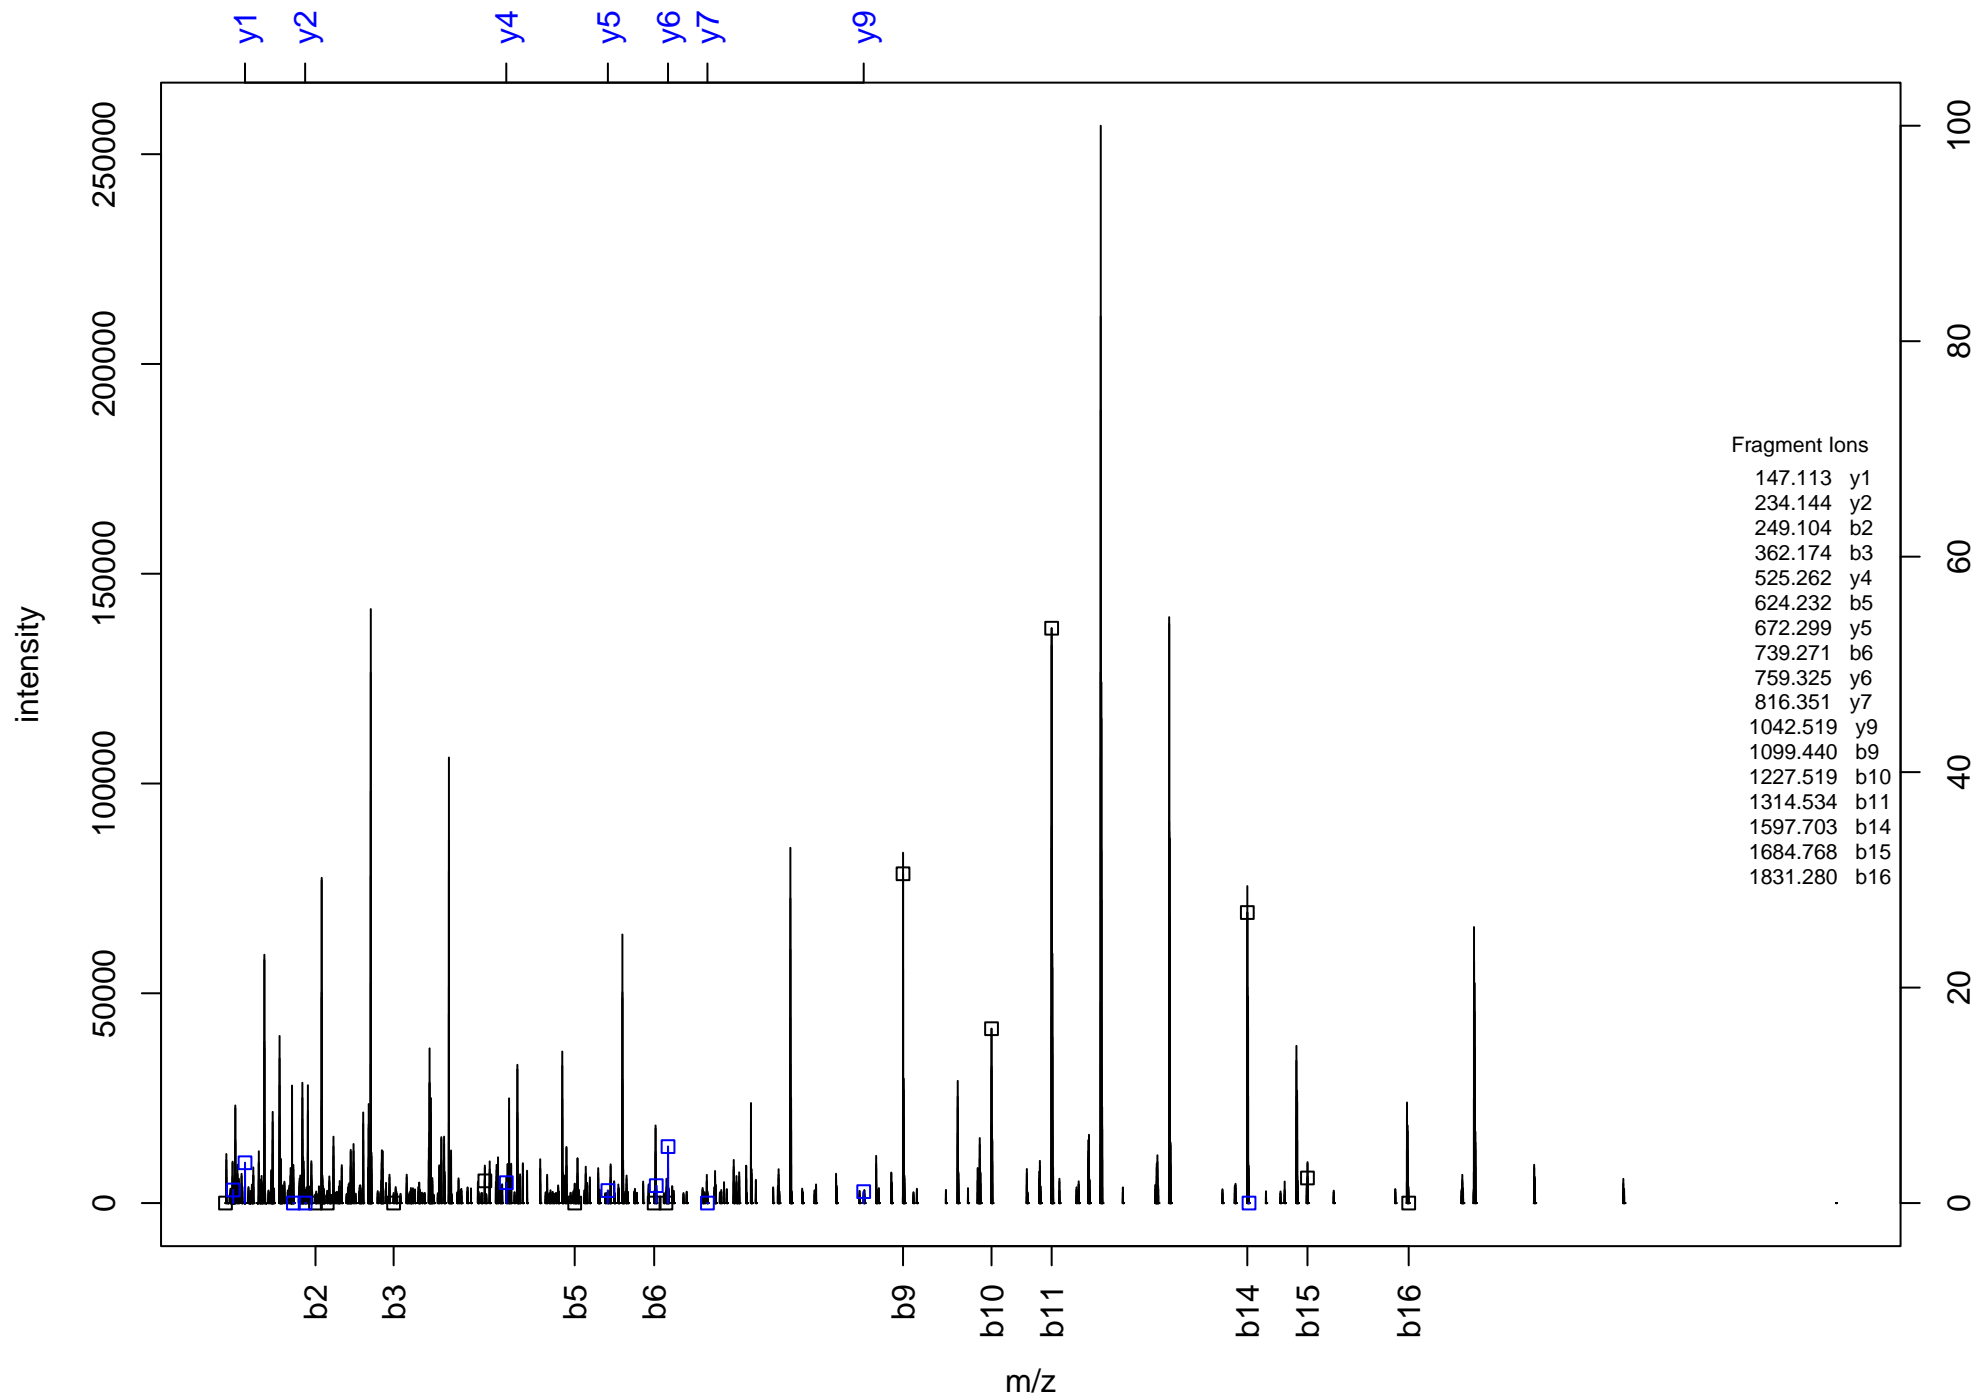

# ELAM\*M\*EQEMLER

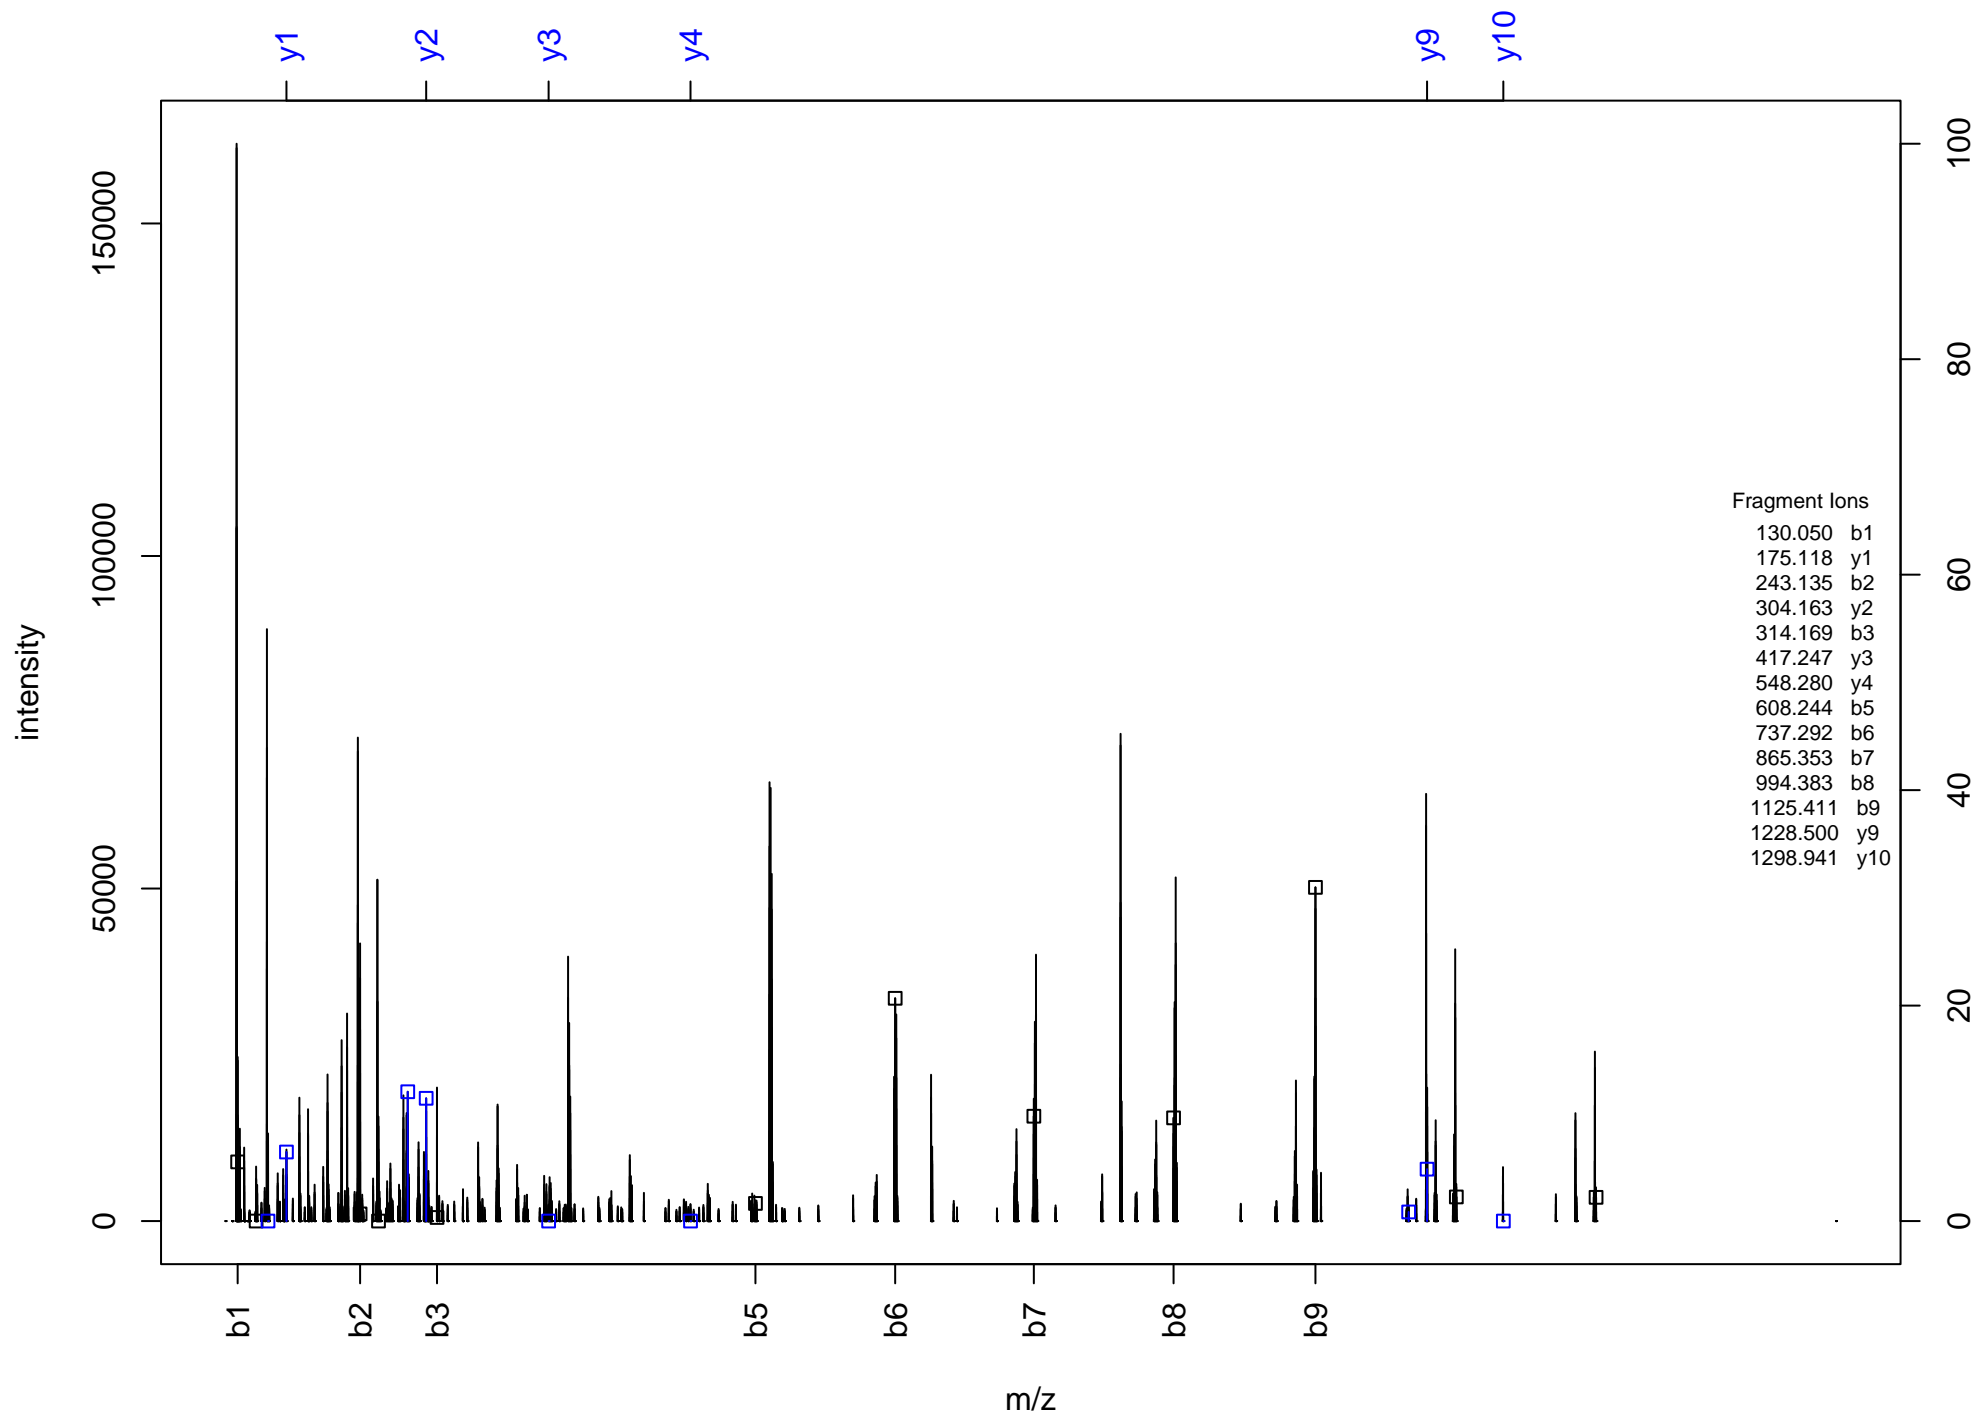

# IPWTAAASELR

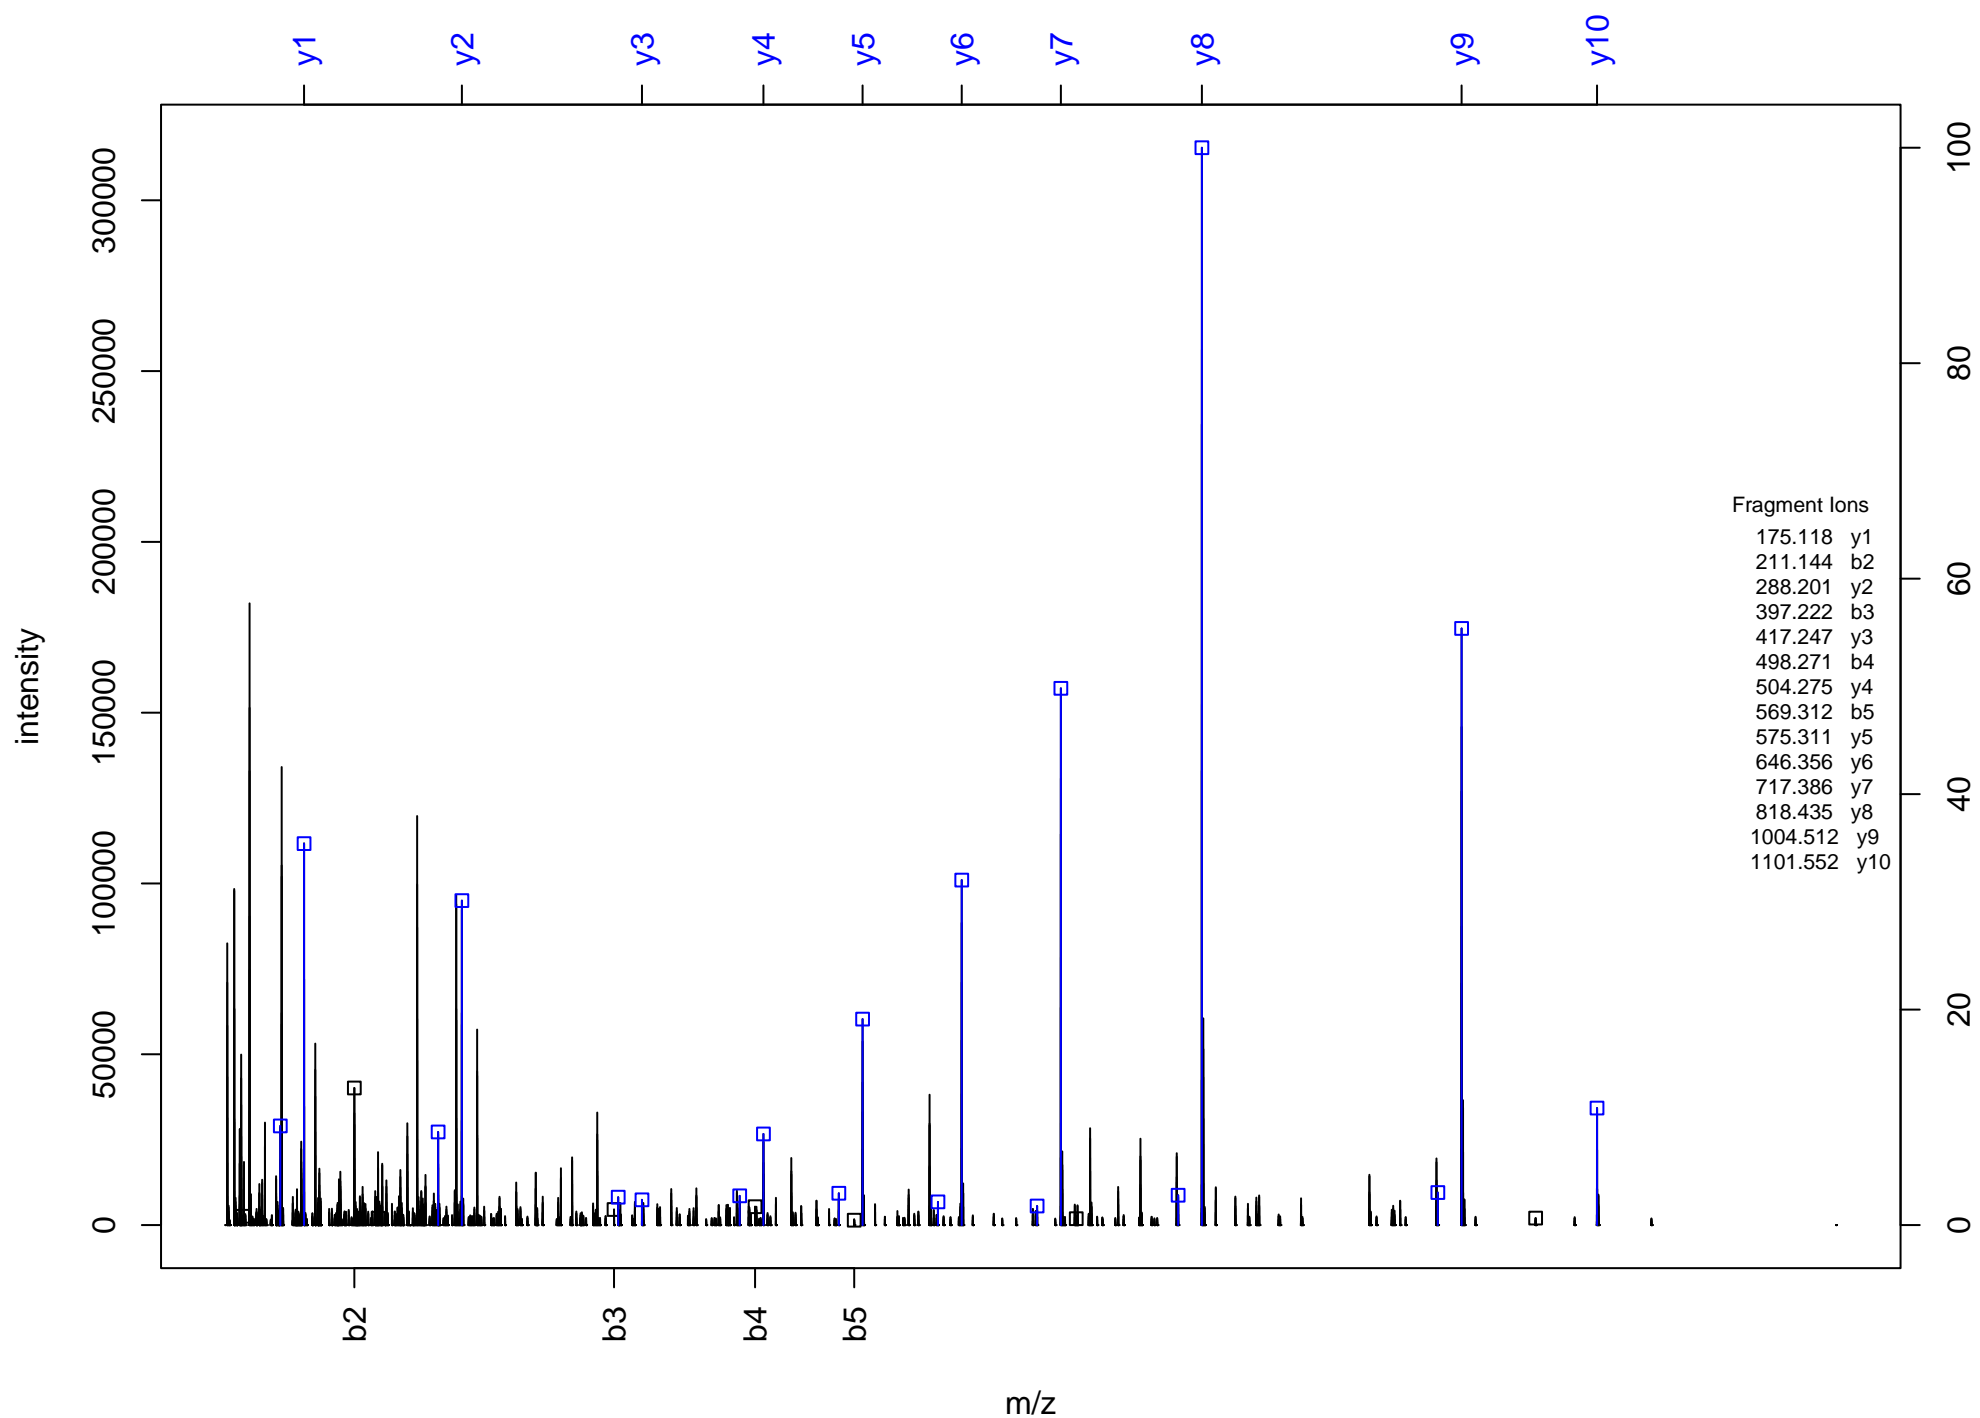

(Ac)MKGWKTIFQAN^GMK

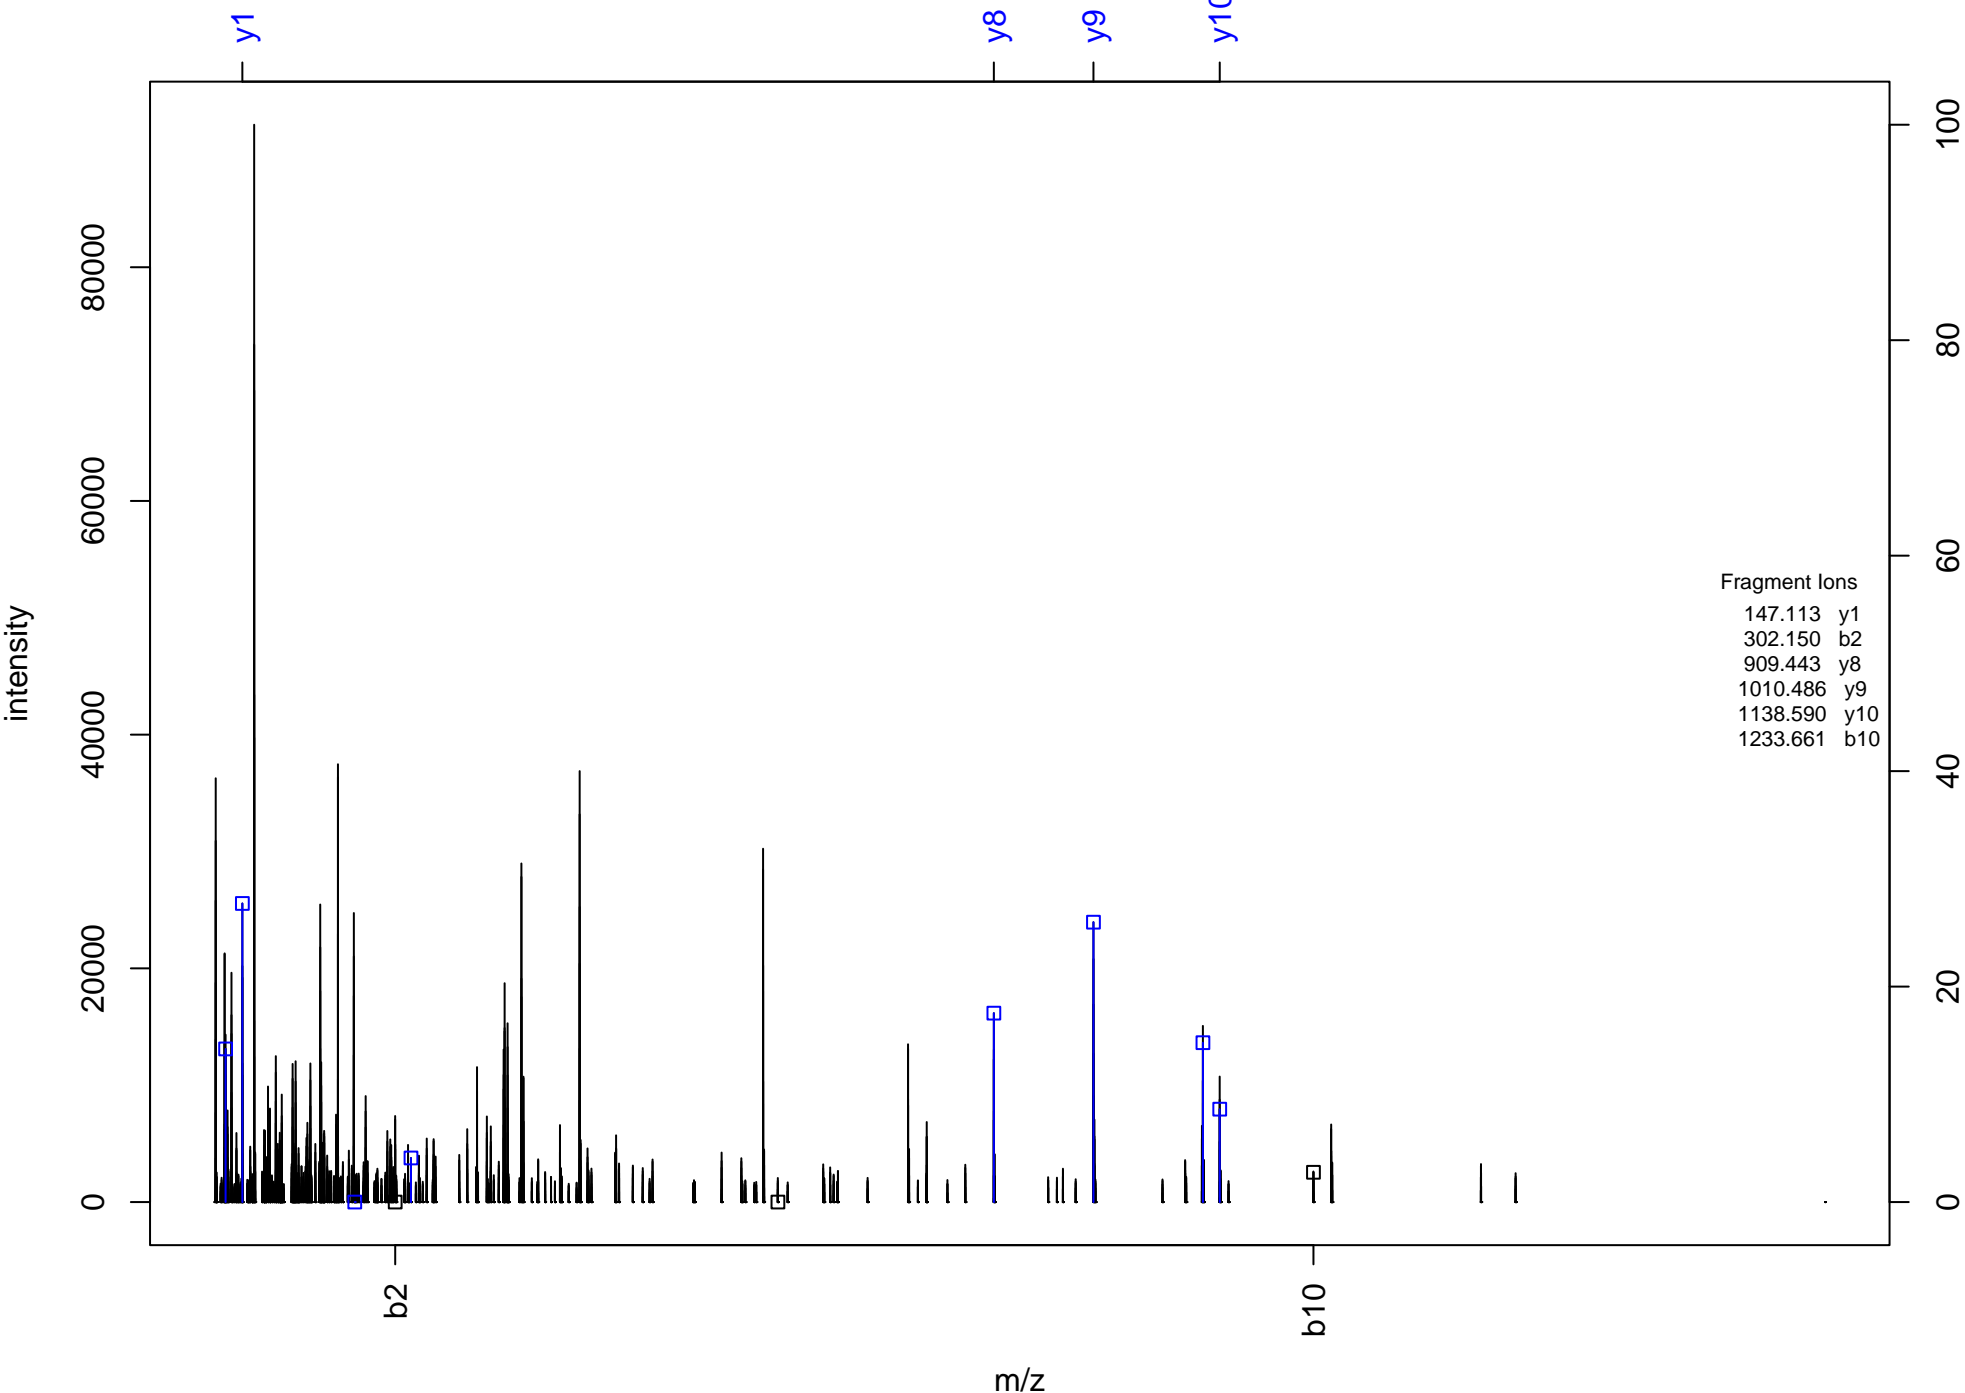

# FAIQYGTGR

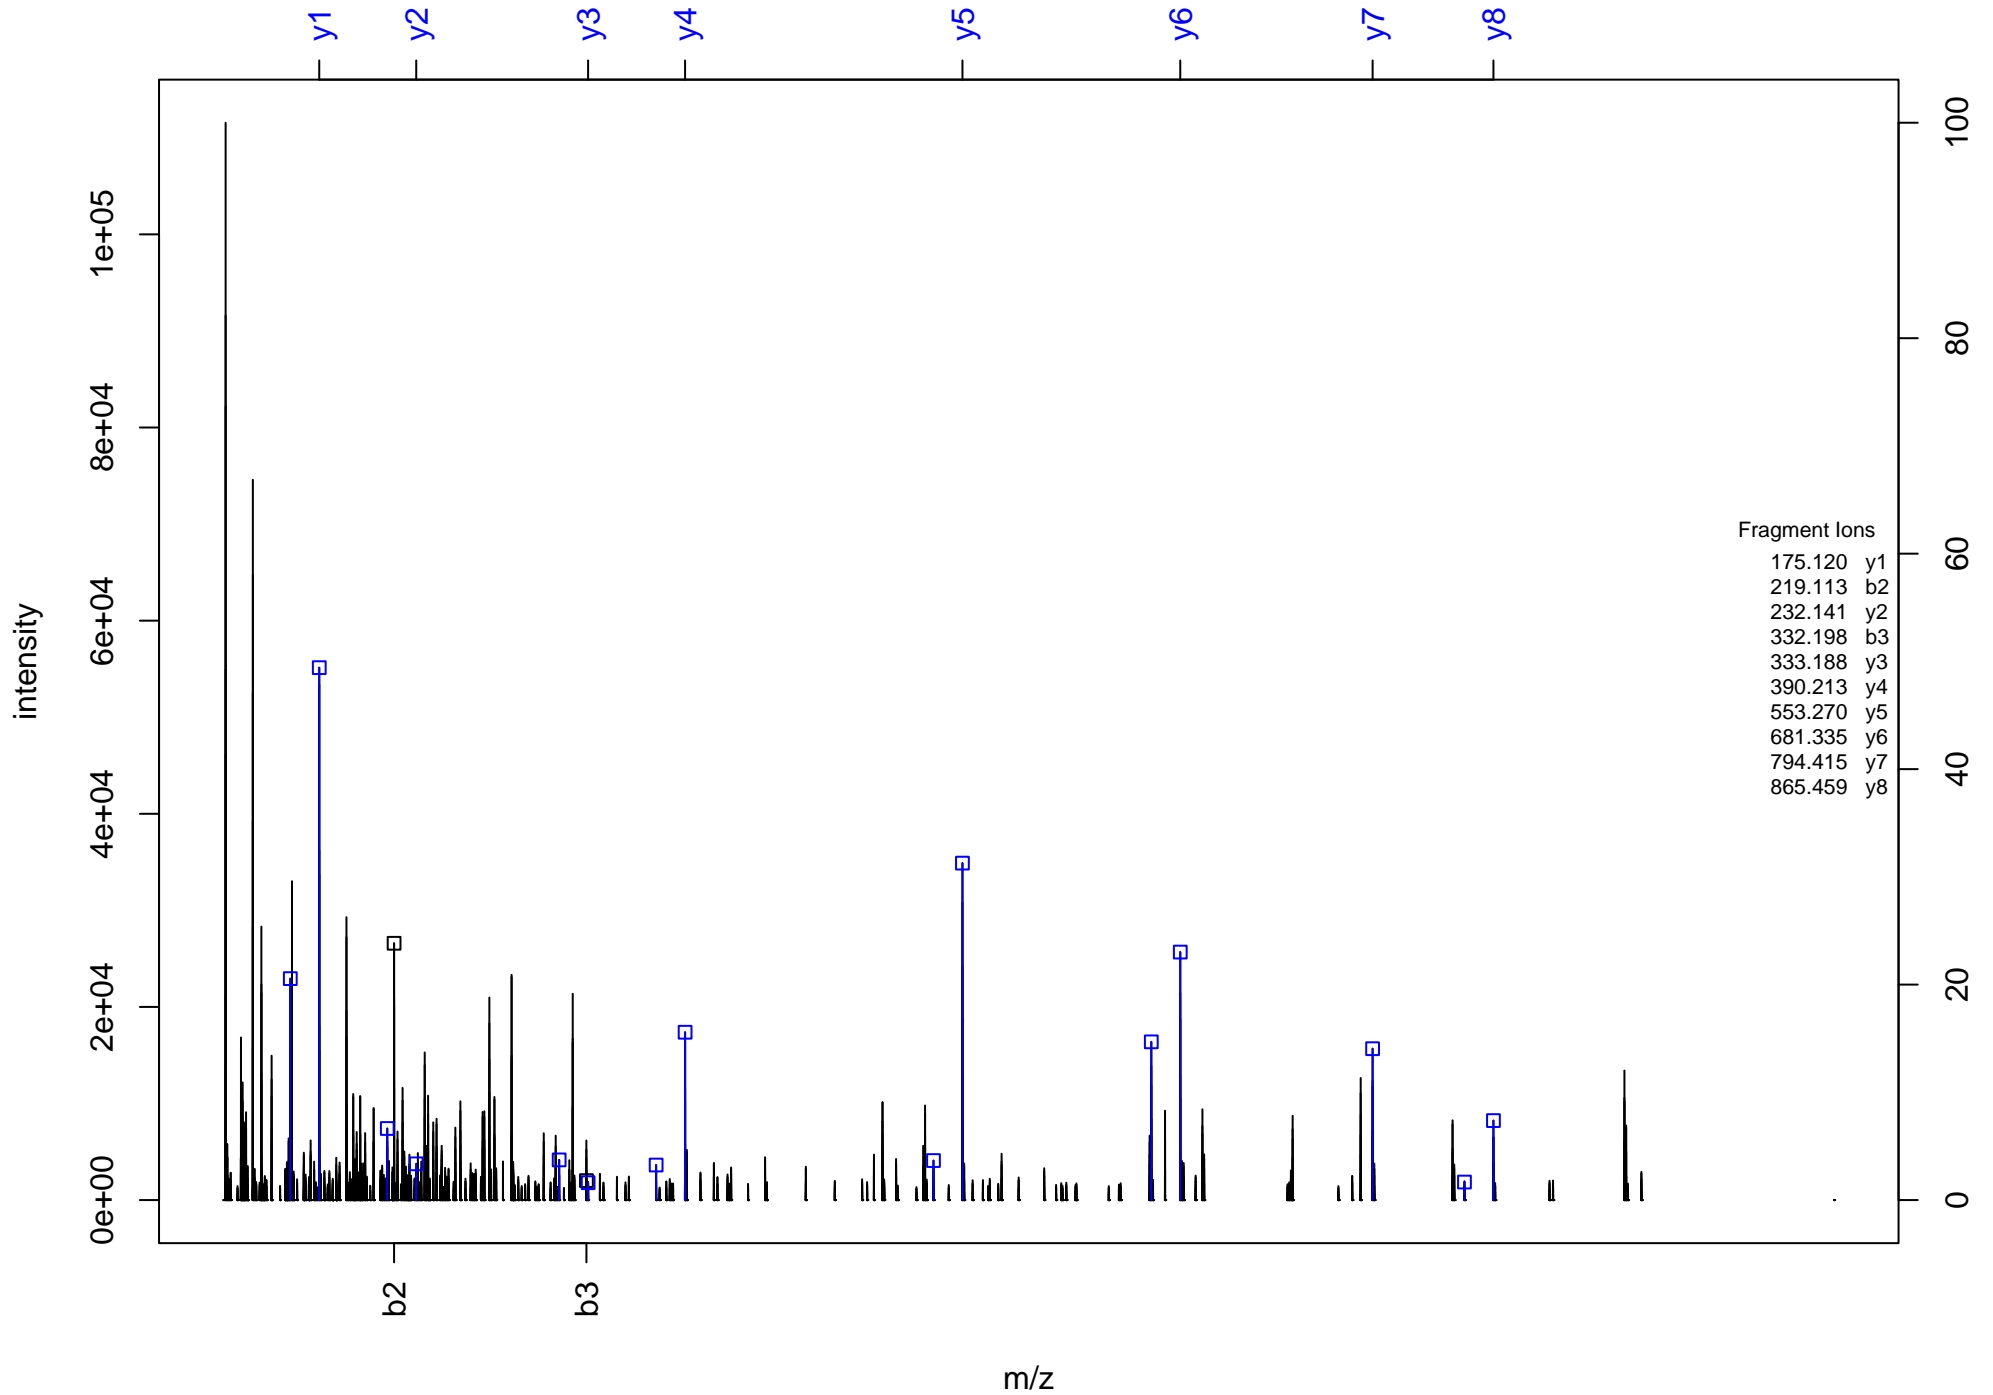

# (Ac)SAHLQWMVVR

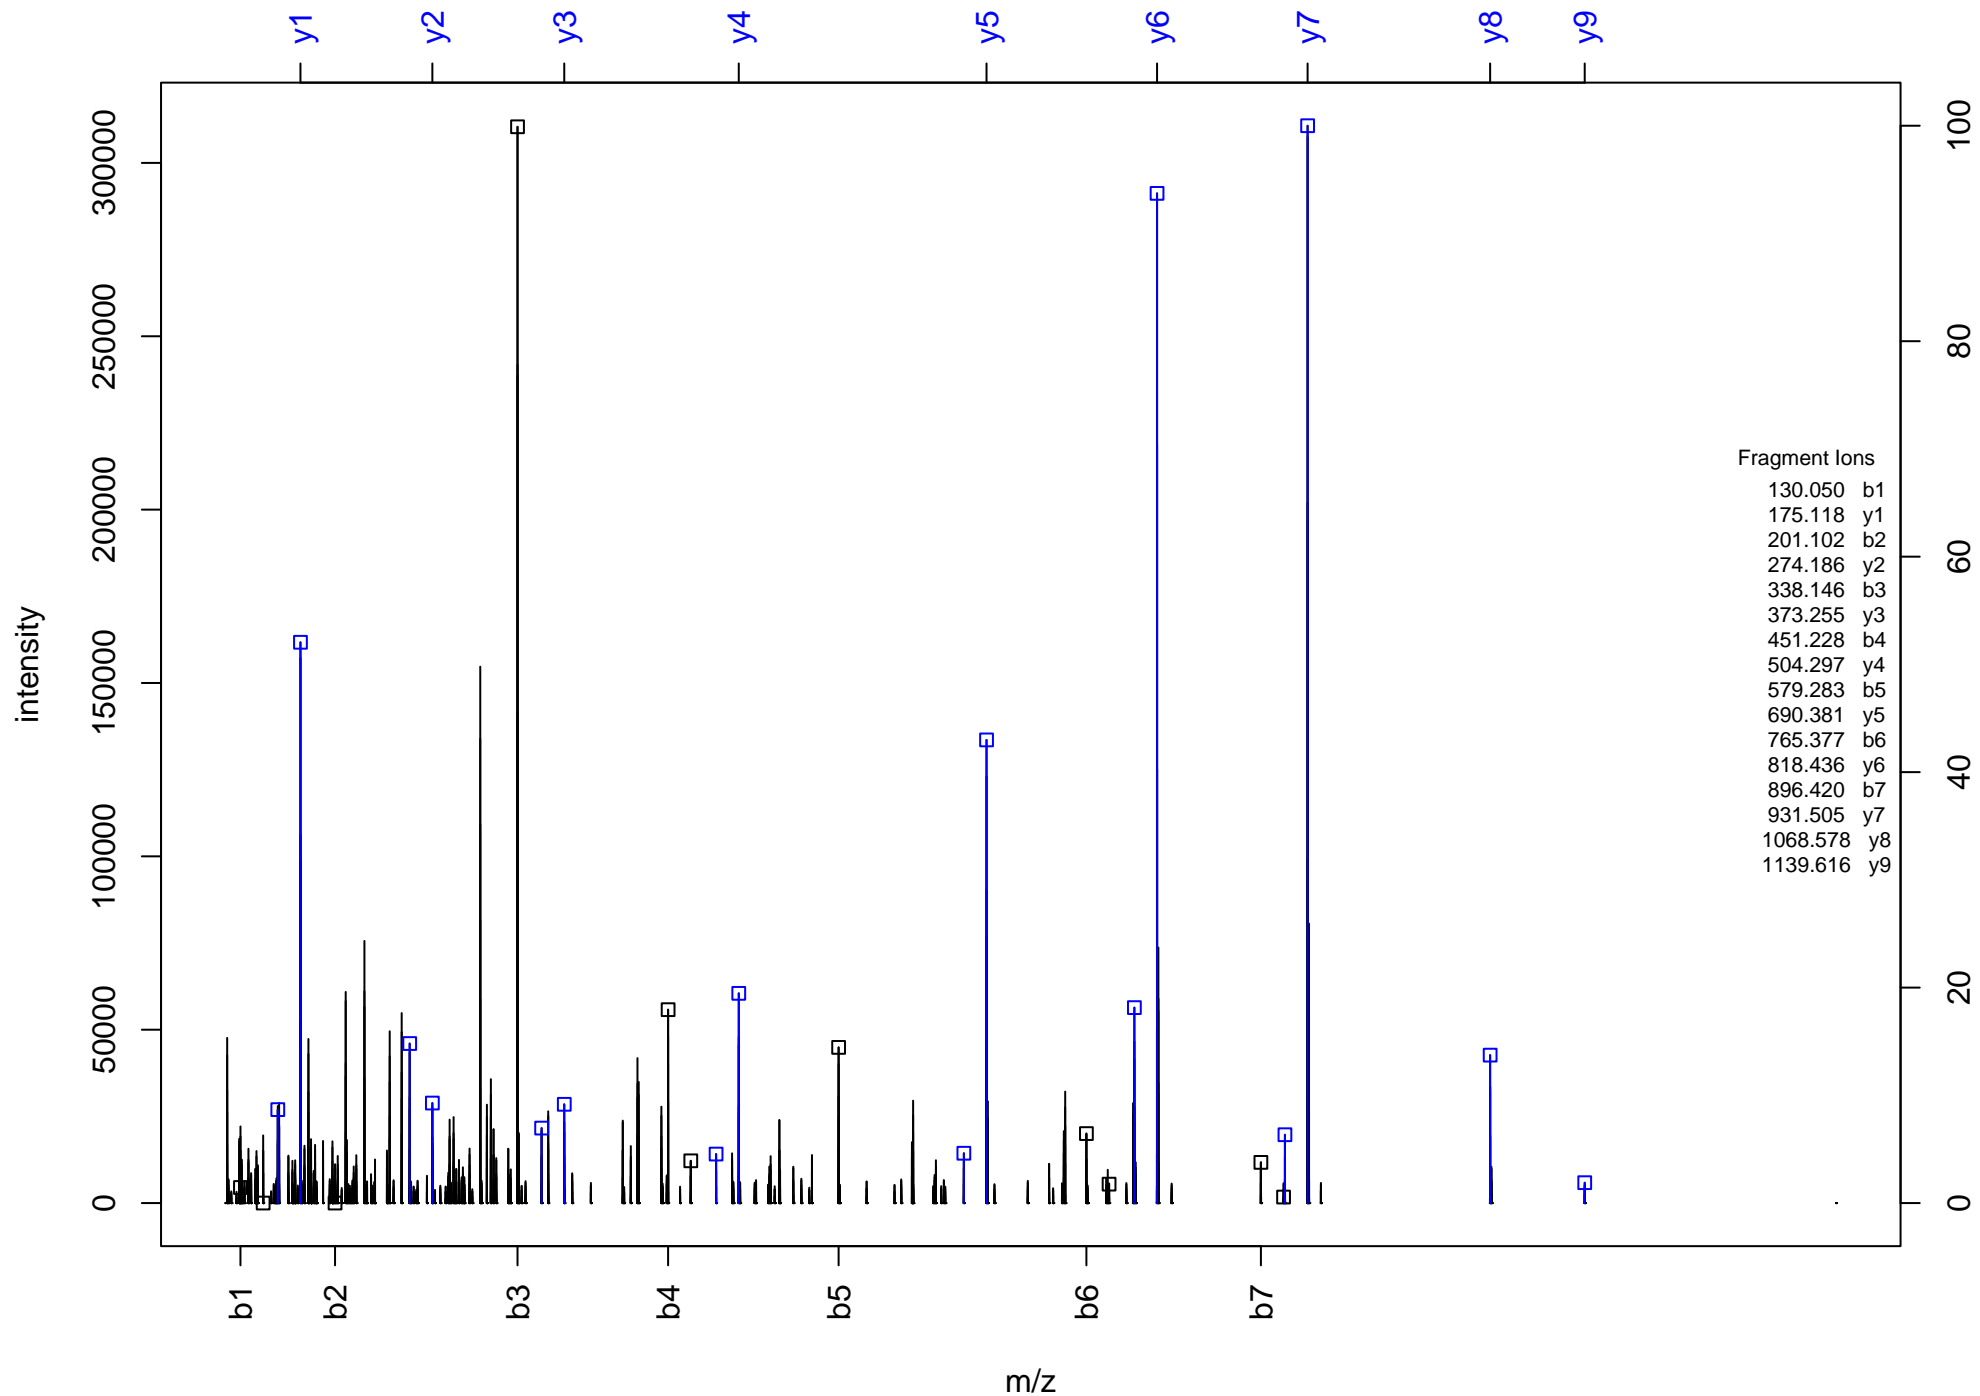

# PVAVGPYGQSQPSCFDR

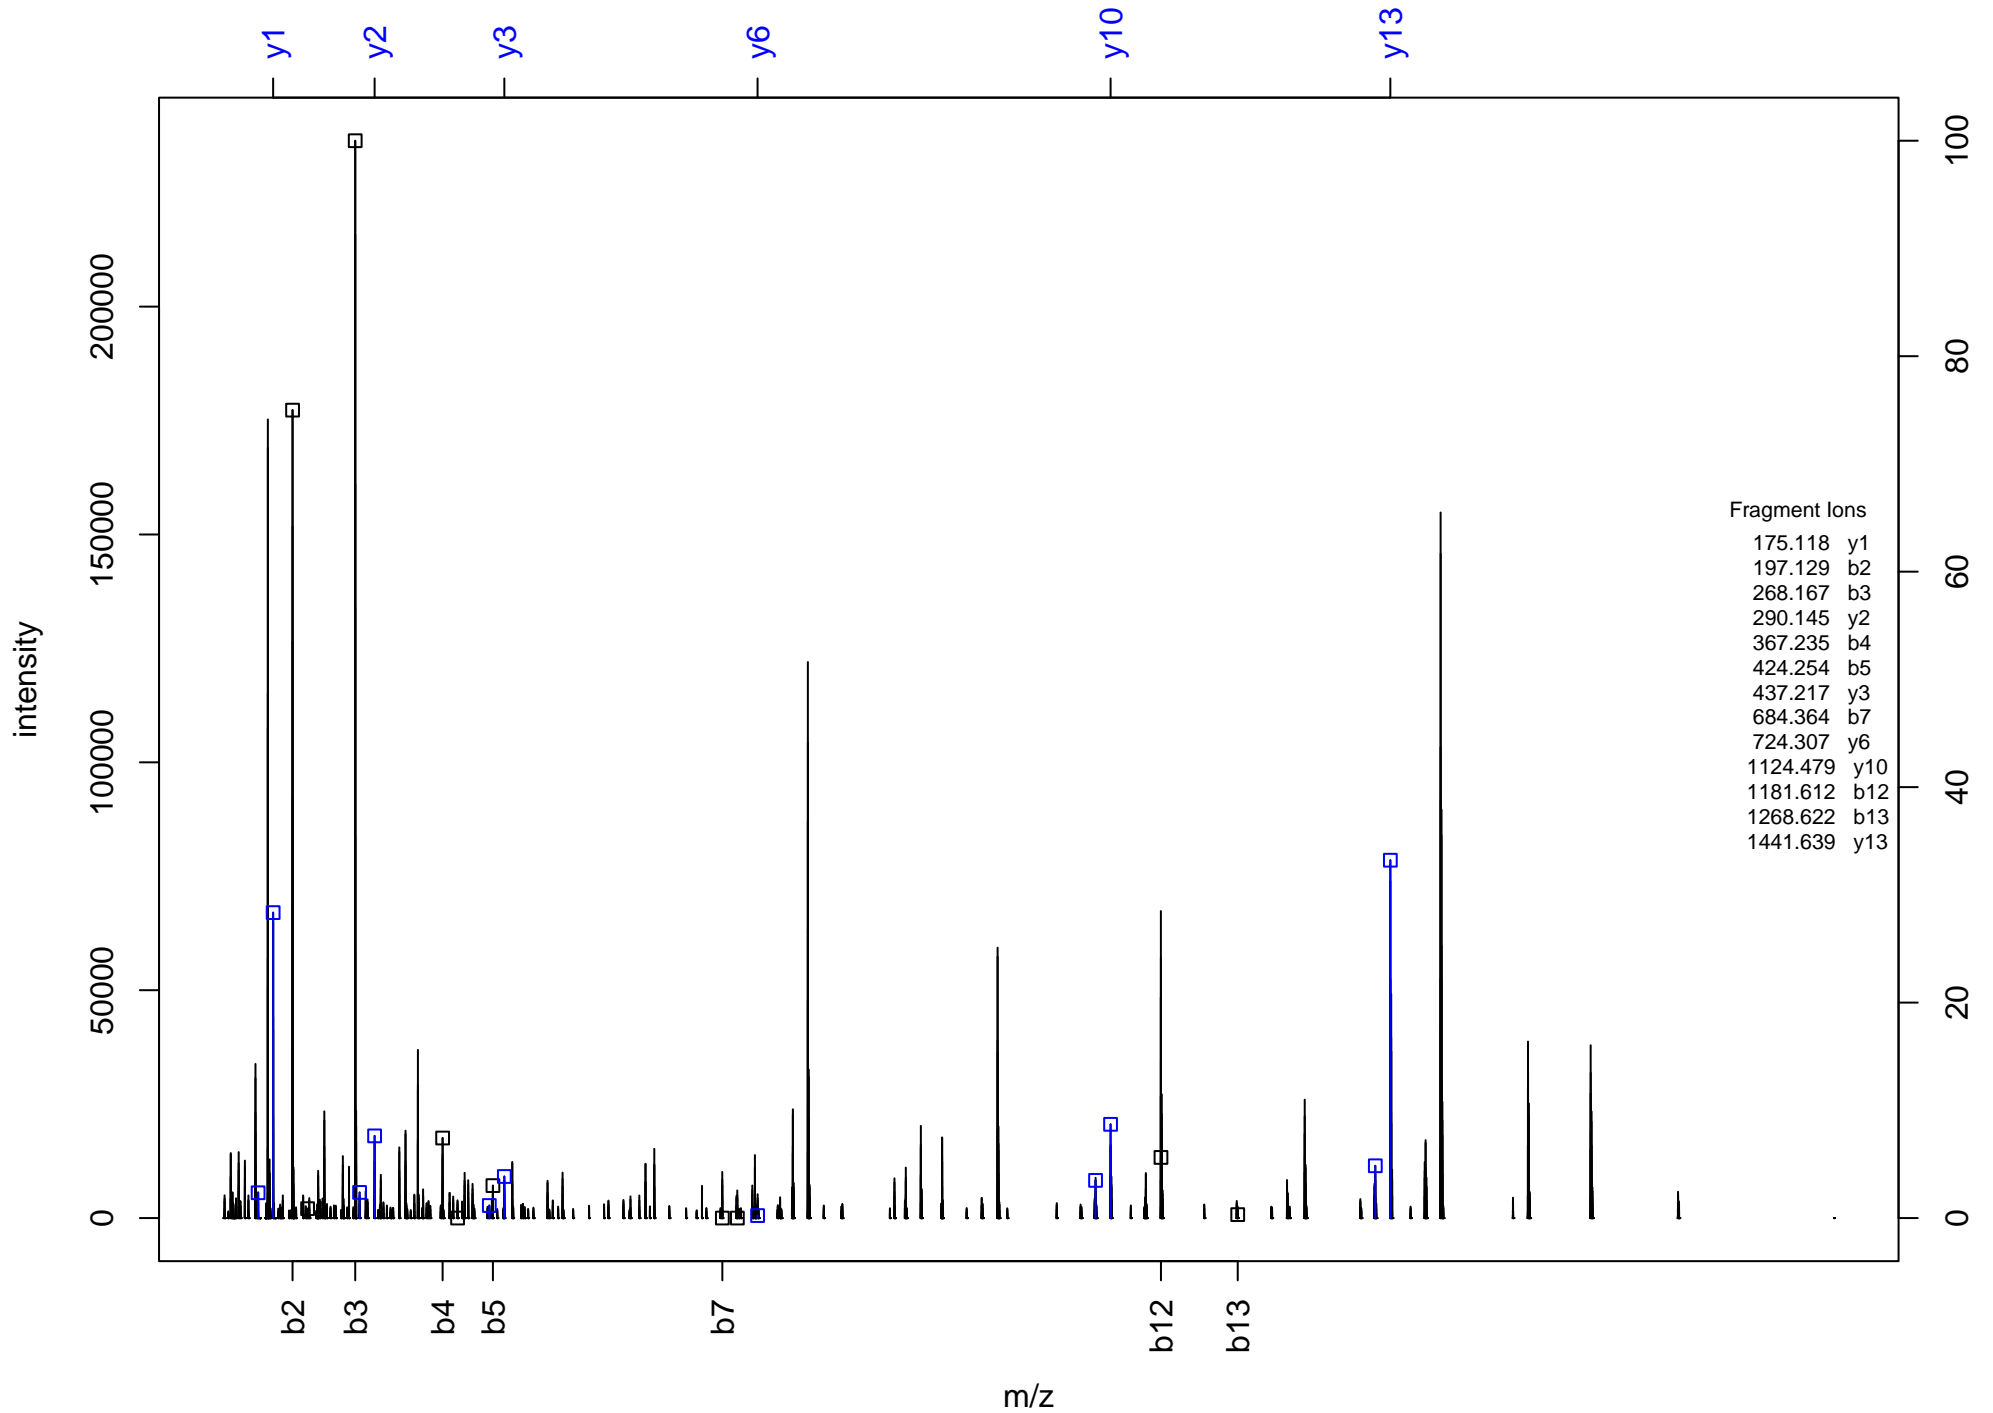

# HTAAPTDTDGP

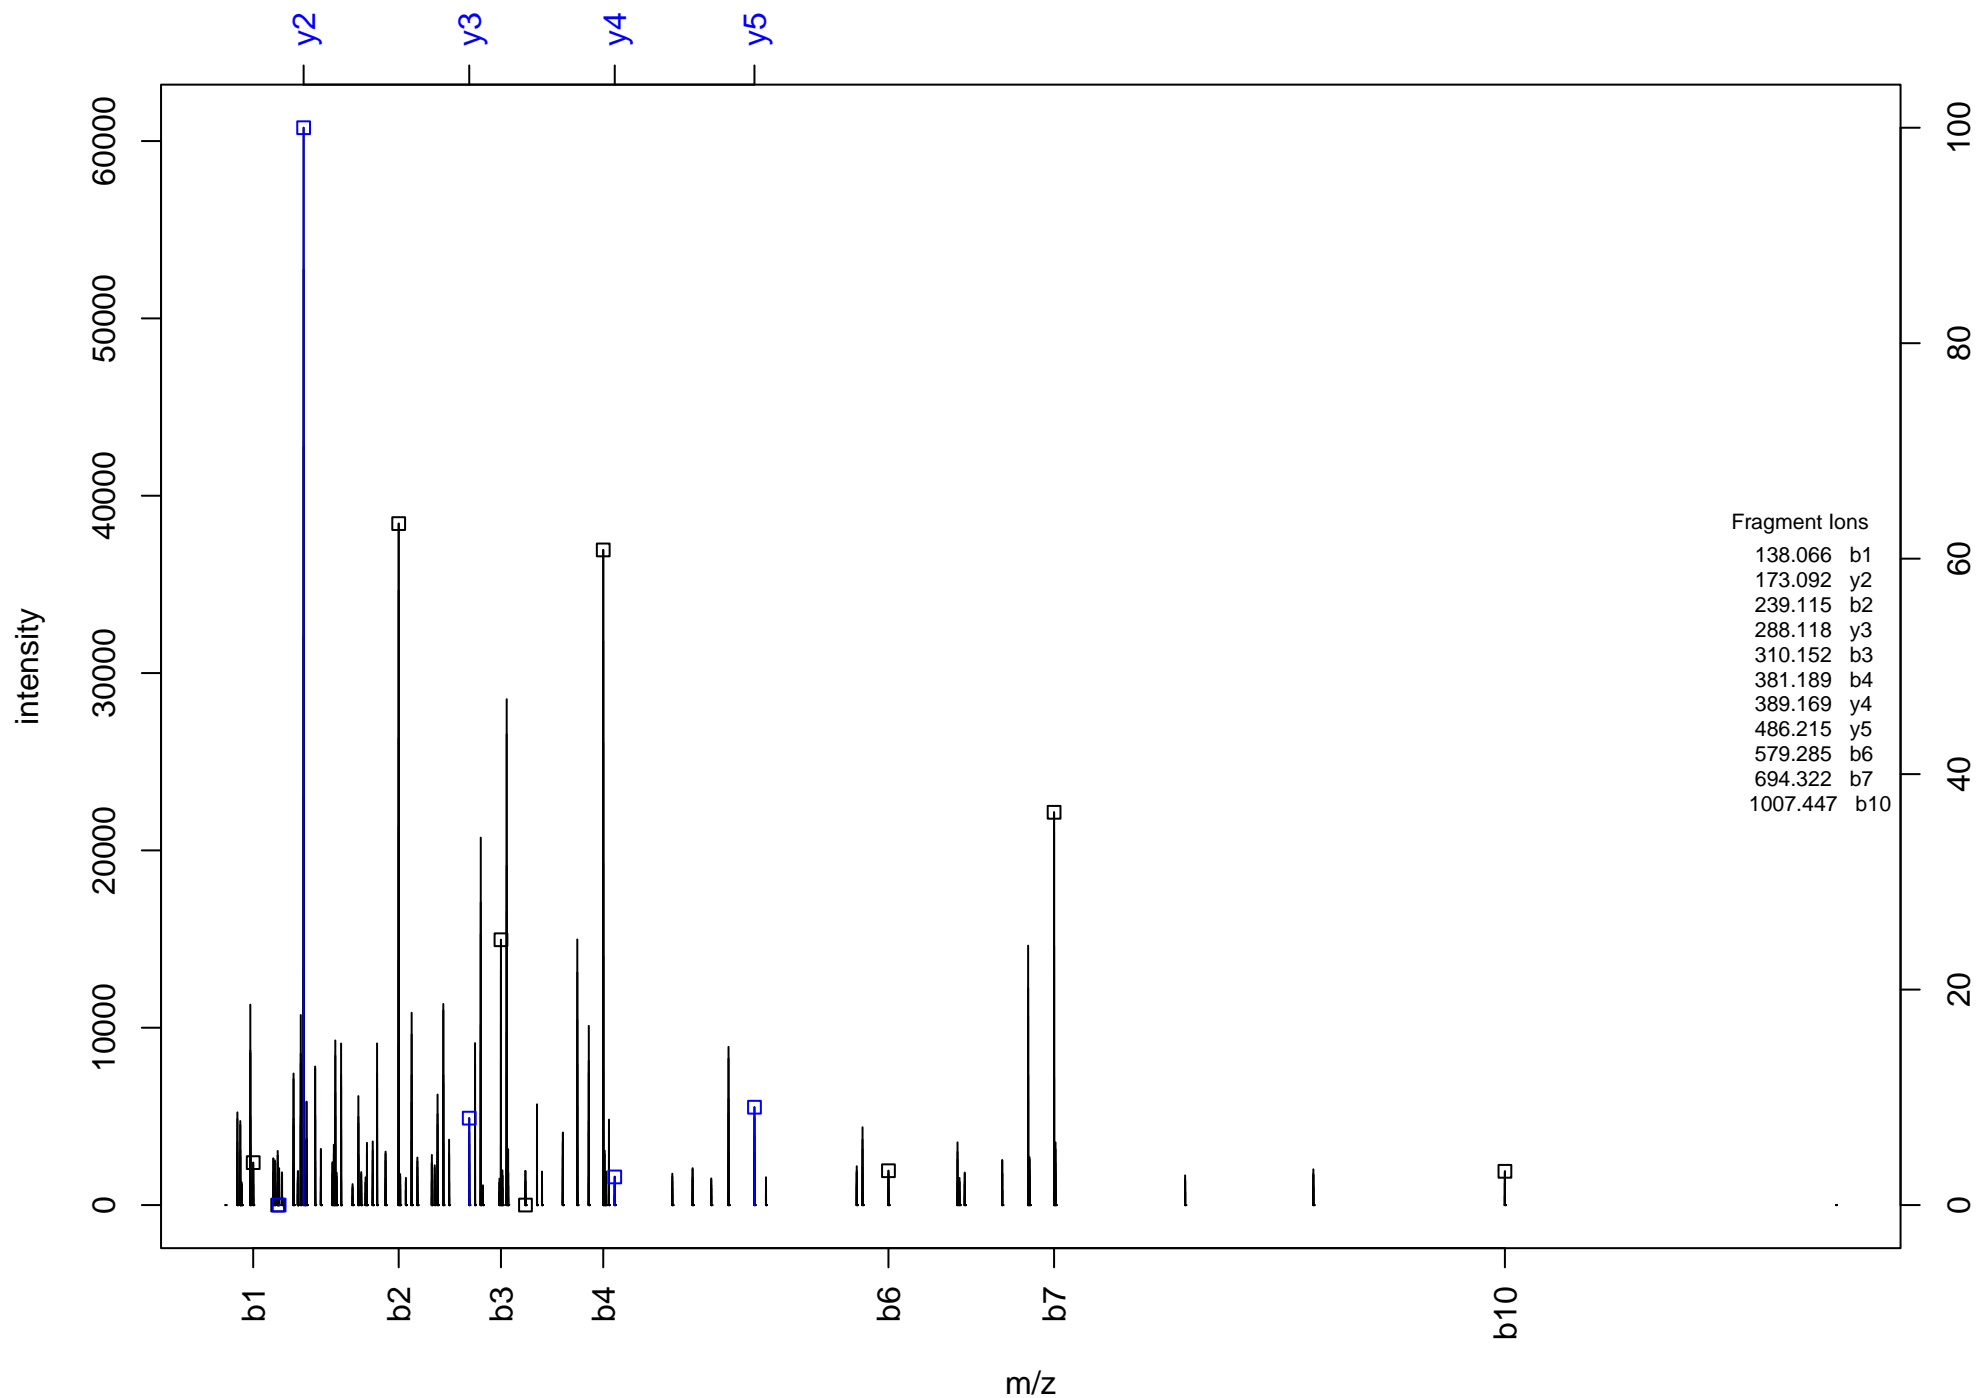



# LLAEQEELER

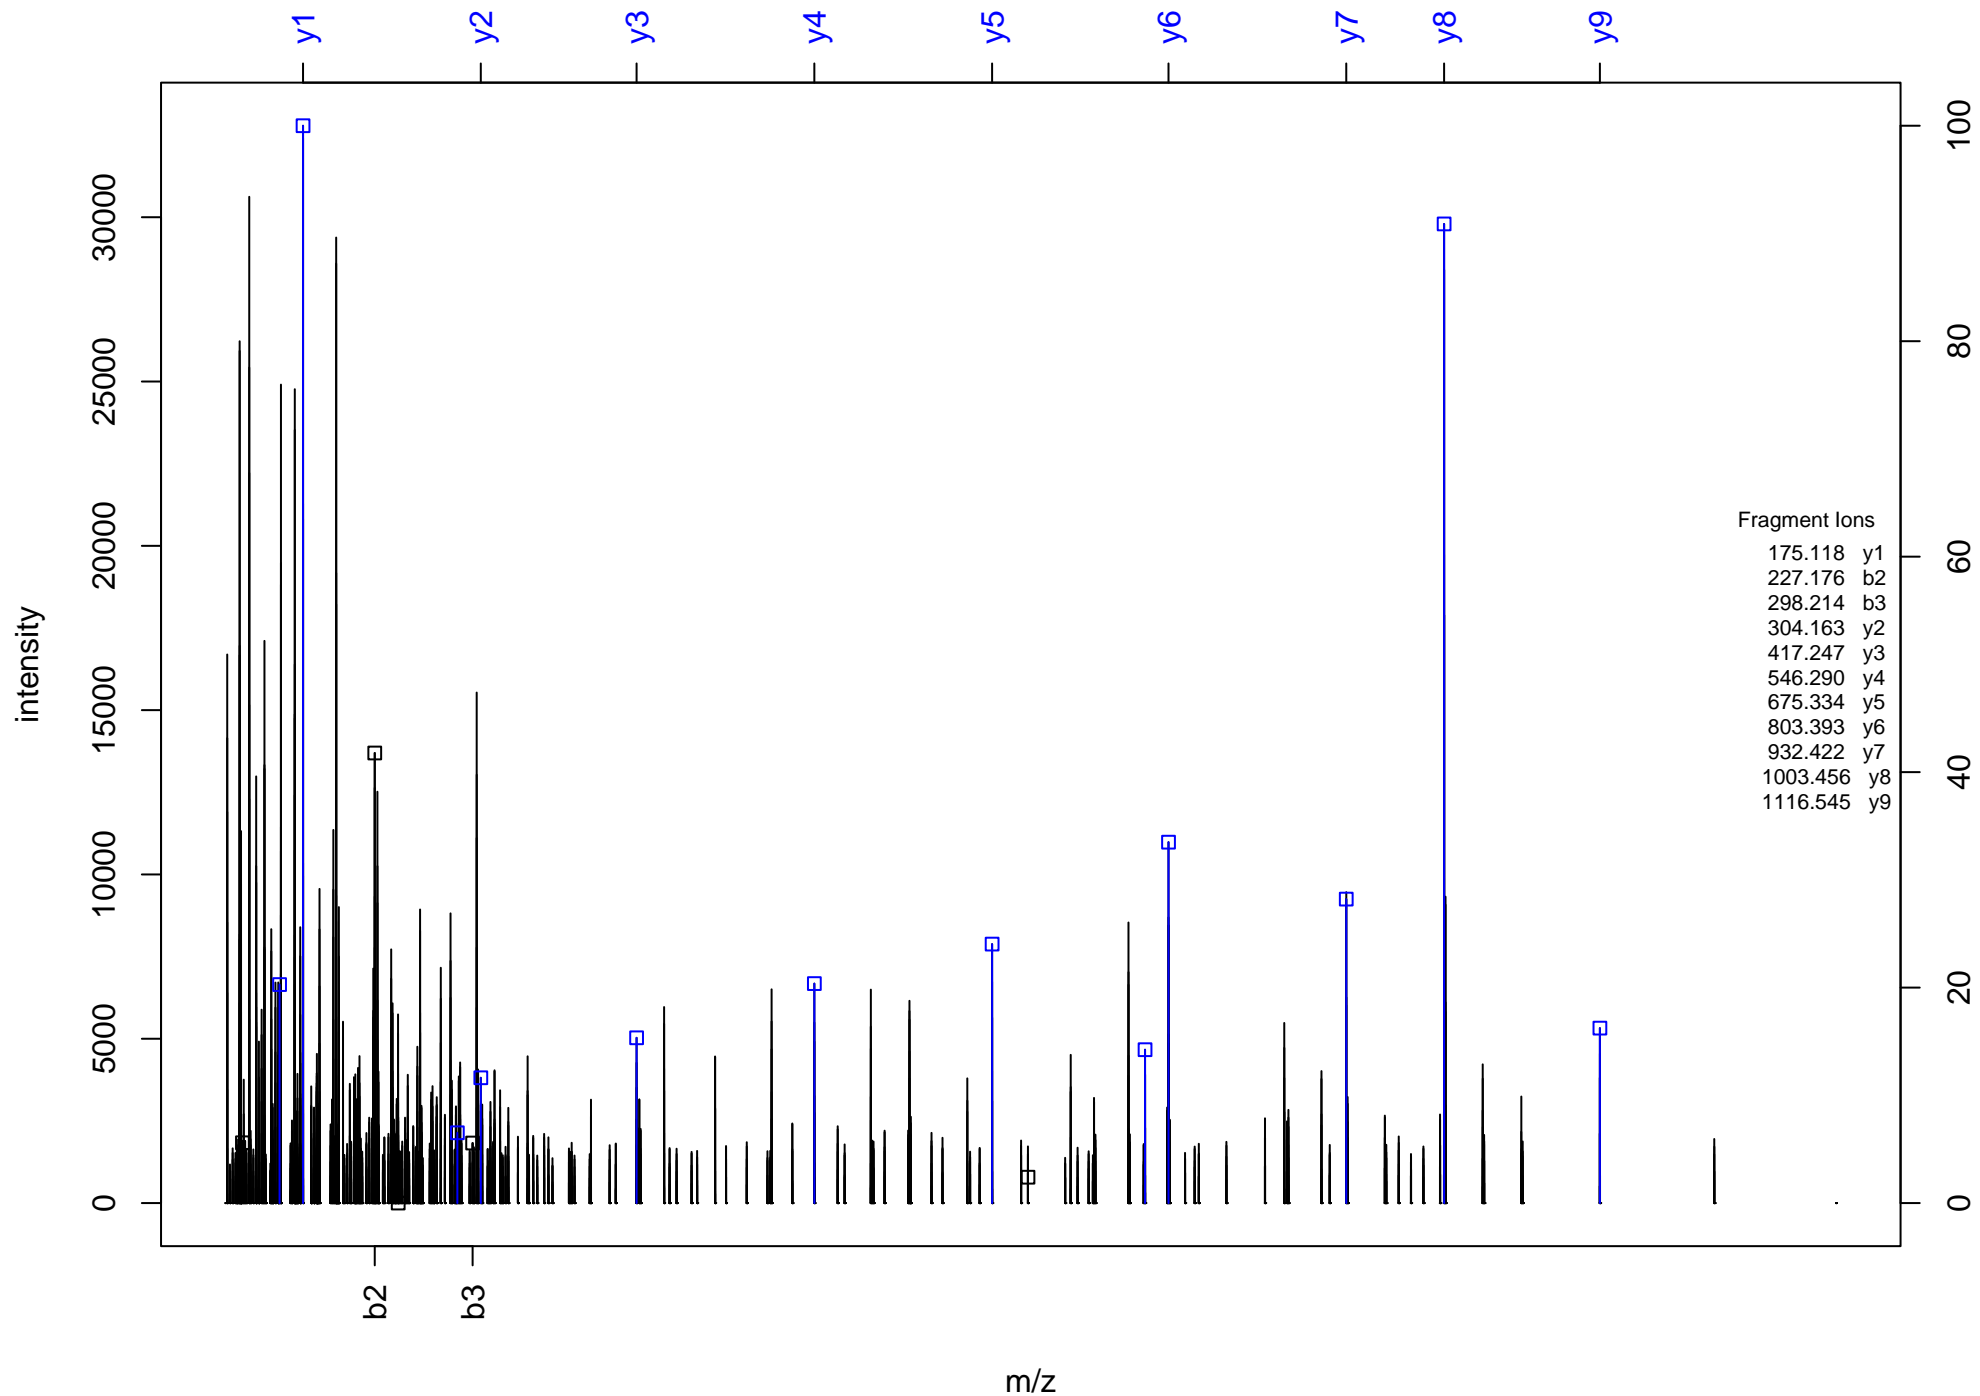

# DALLLIFANK

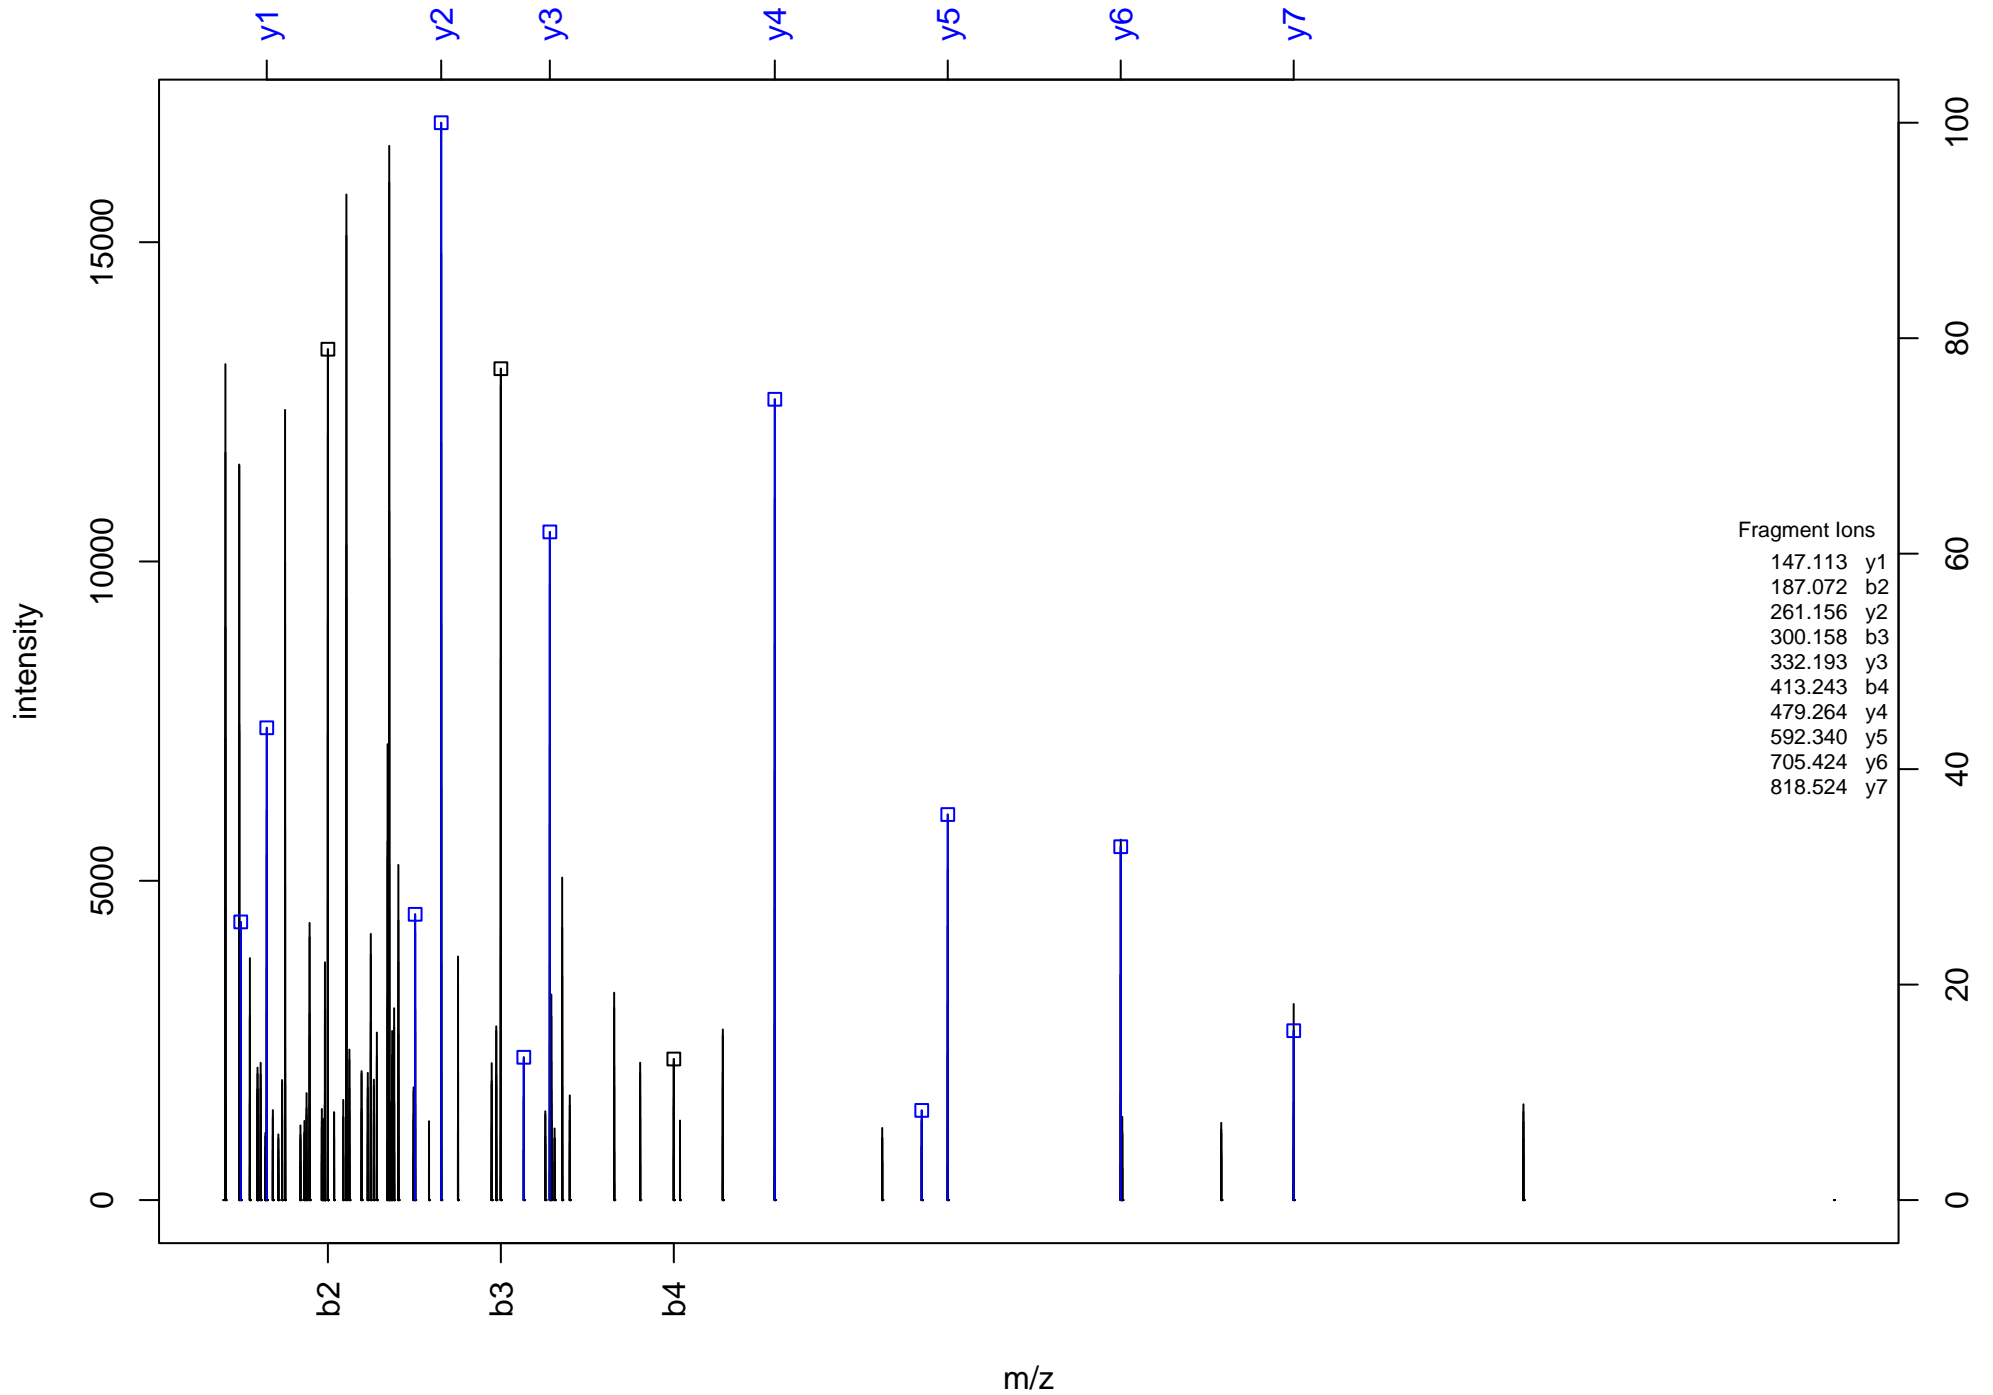

# SVTSNQSDGTQESCESPDVLDR

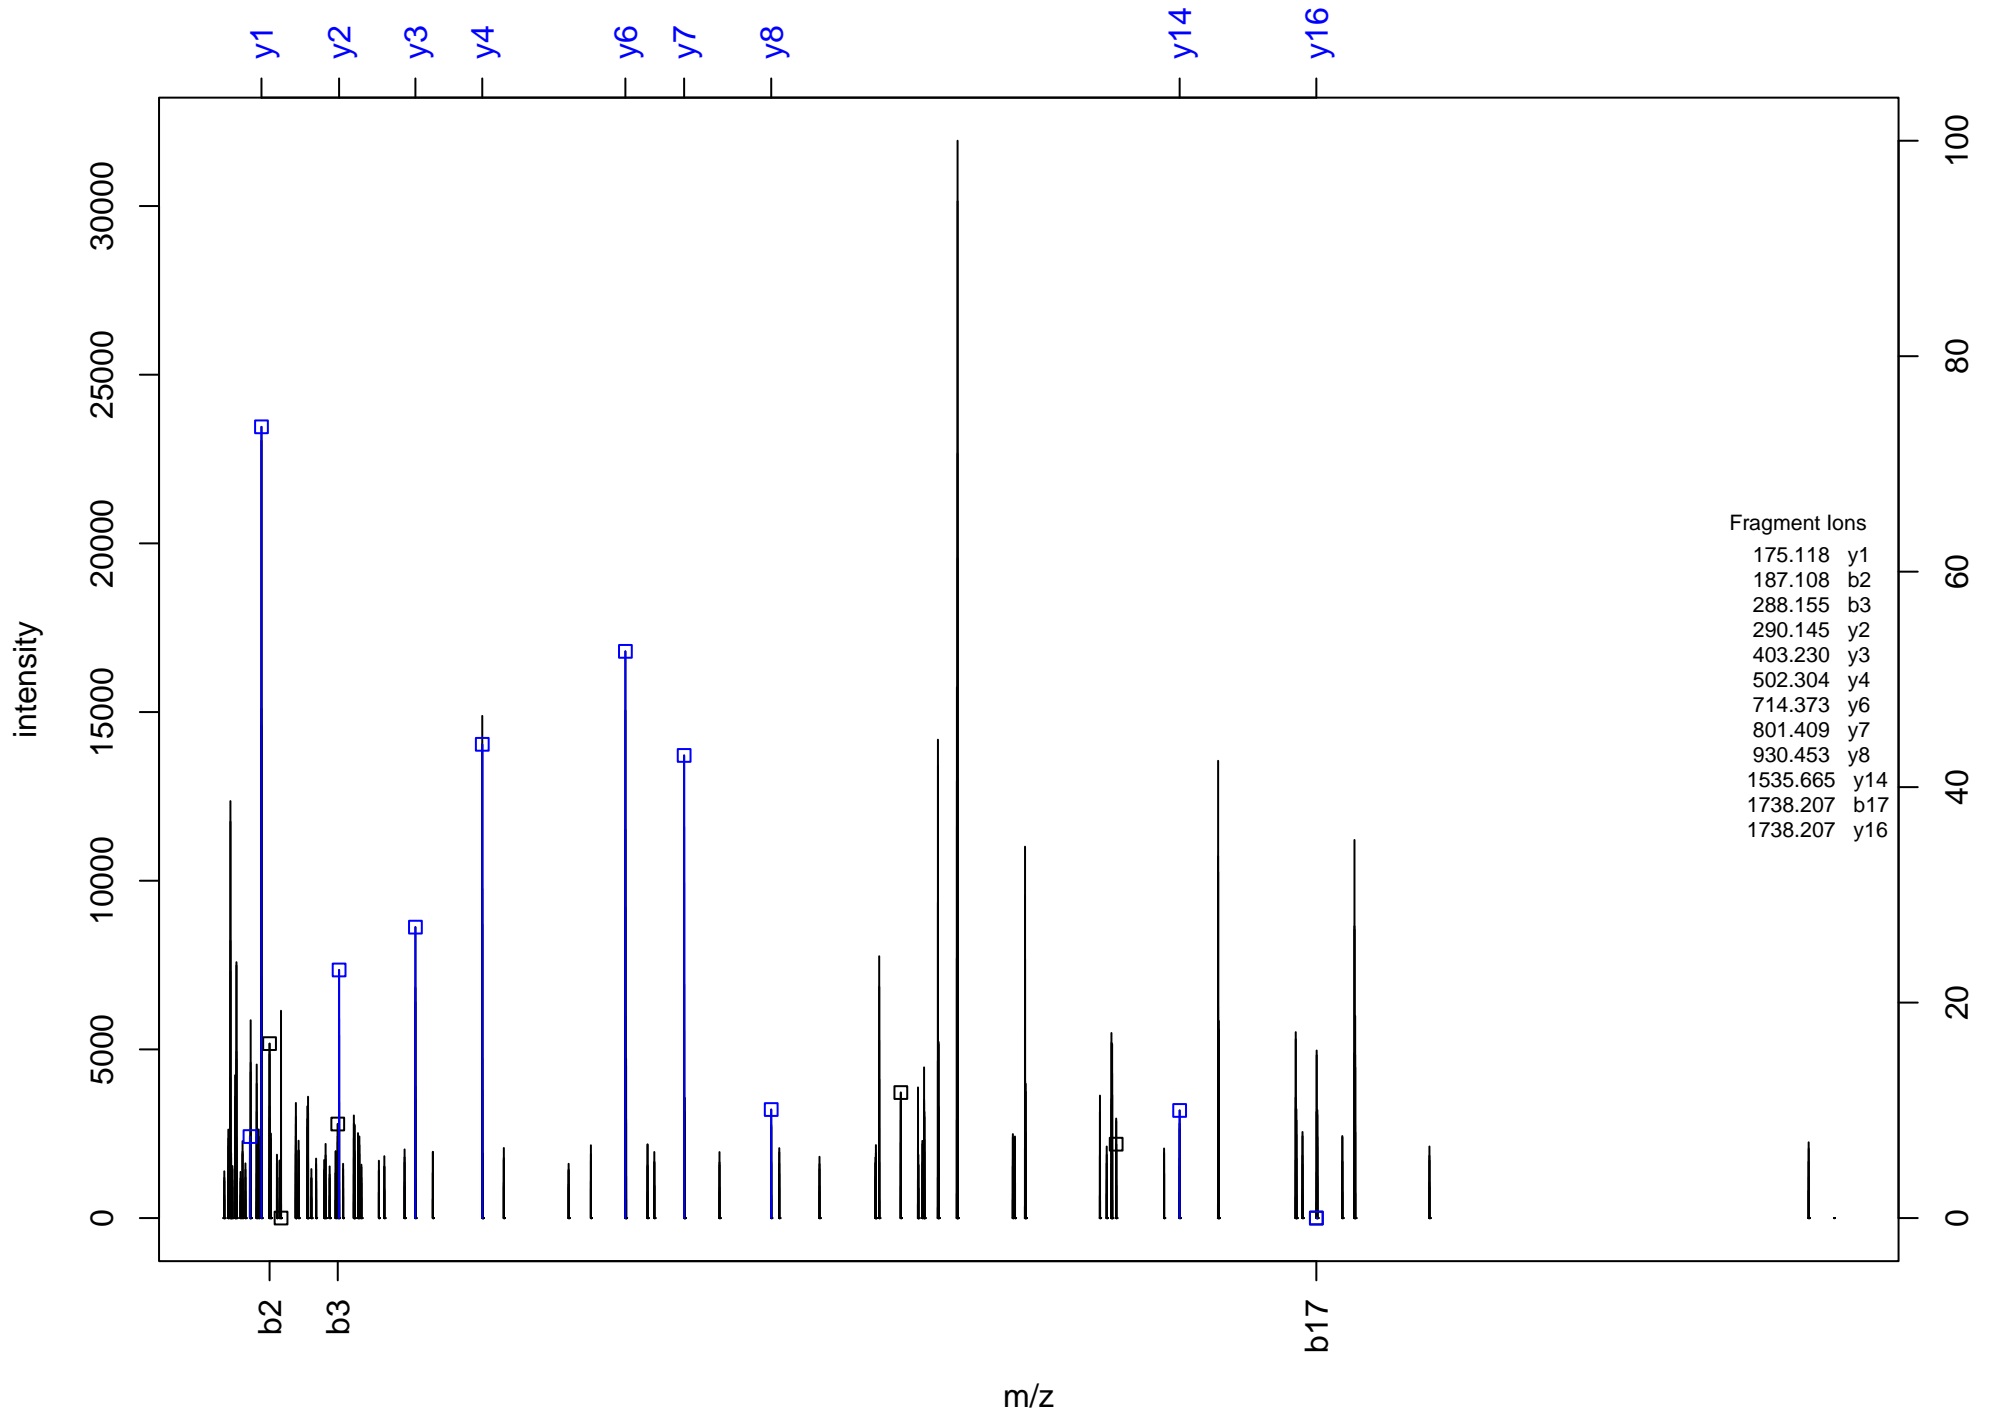

# FCNTEDEETTYLR

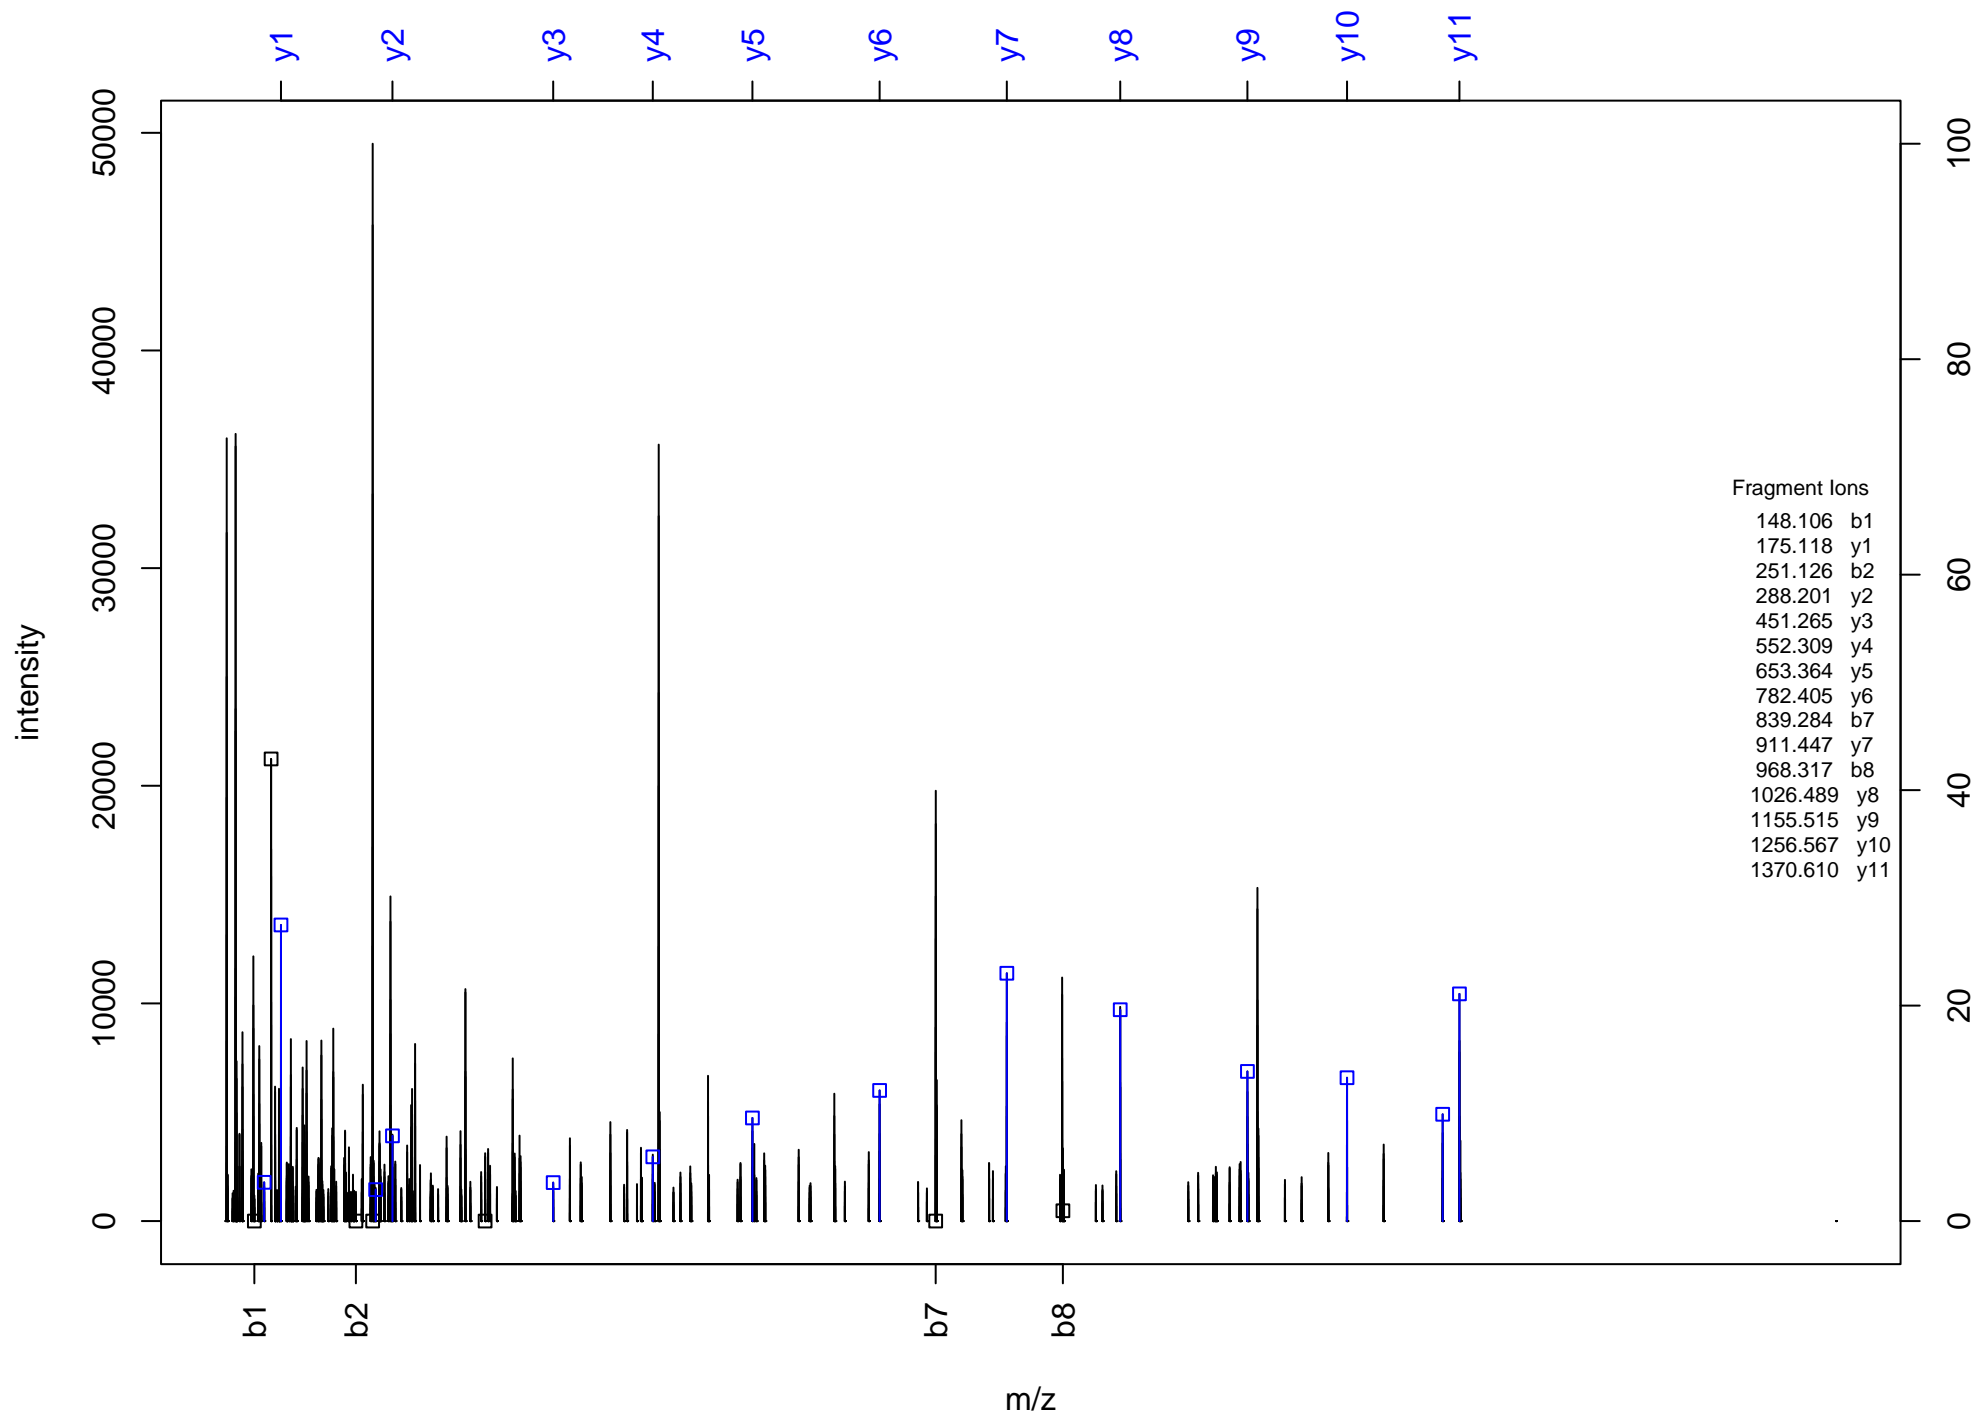

# EQDNPEDPVNSPYSSR

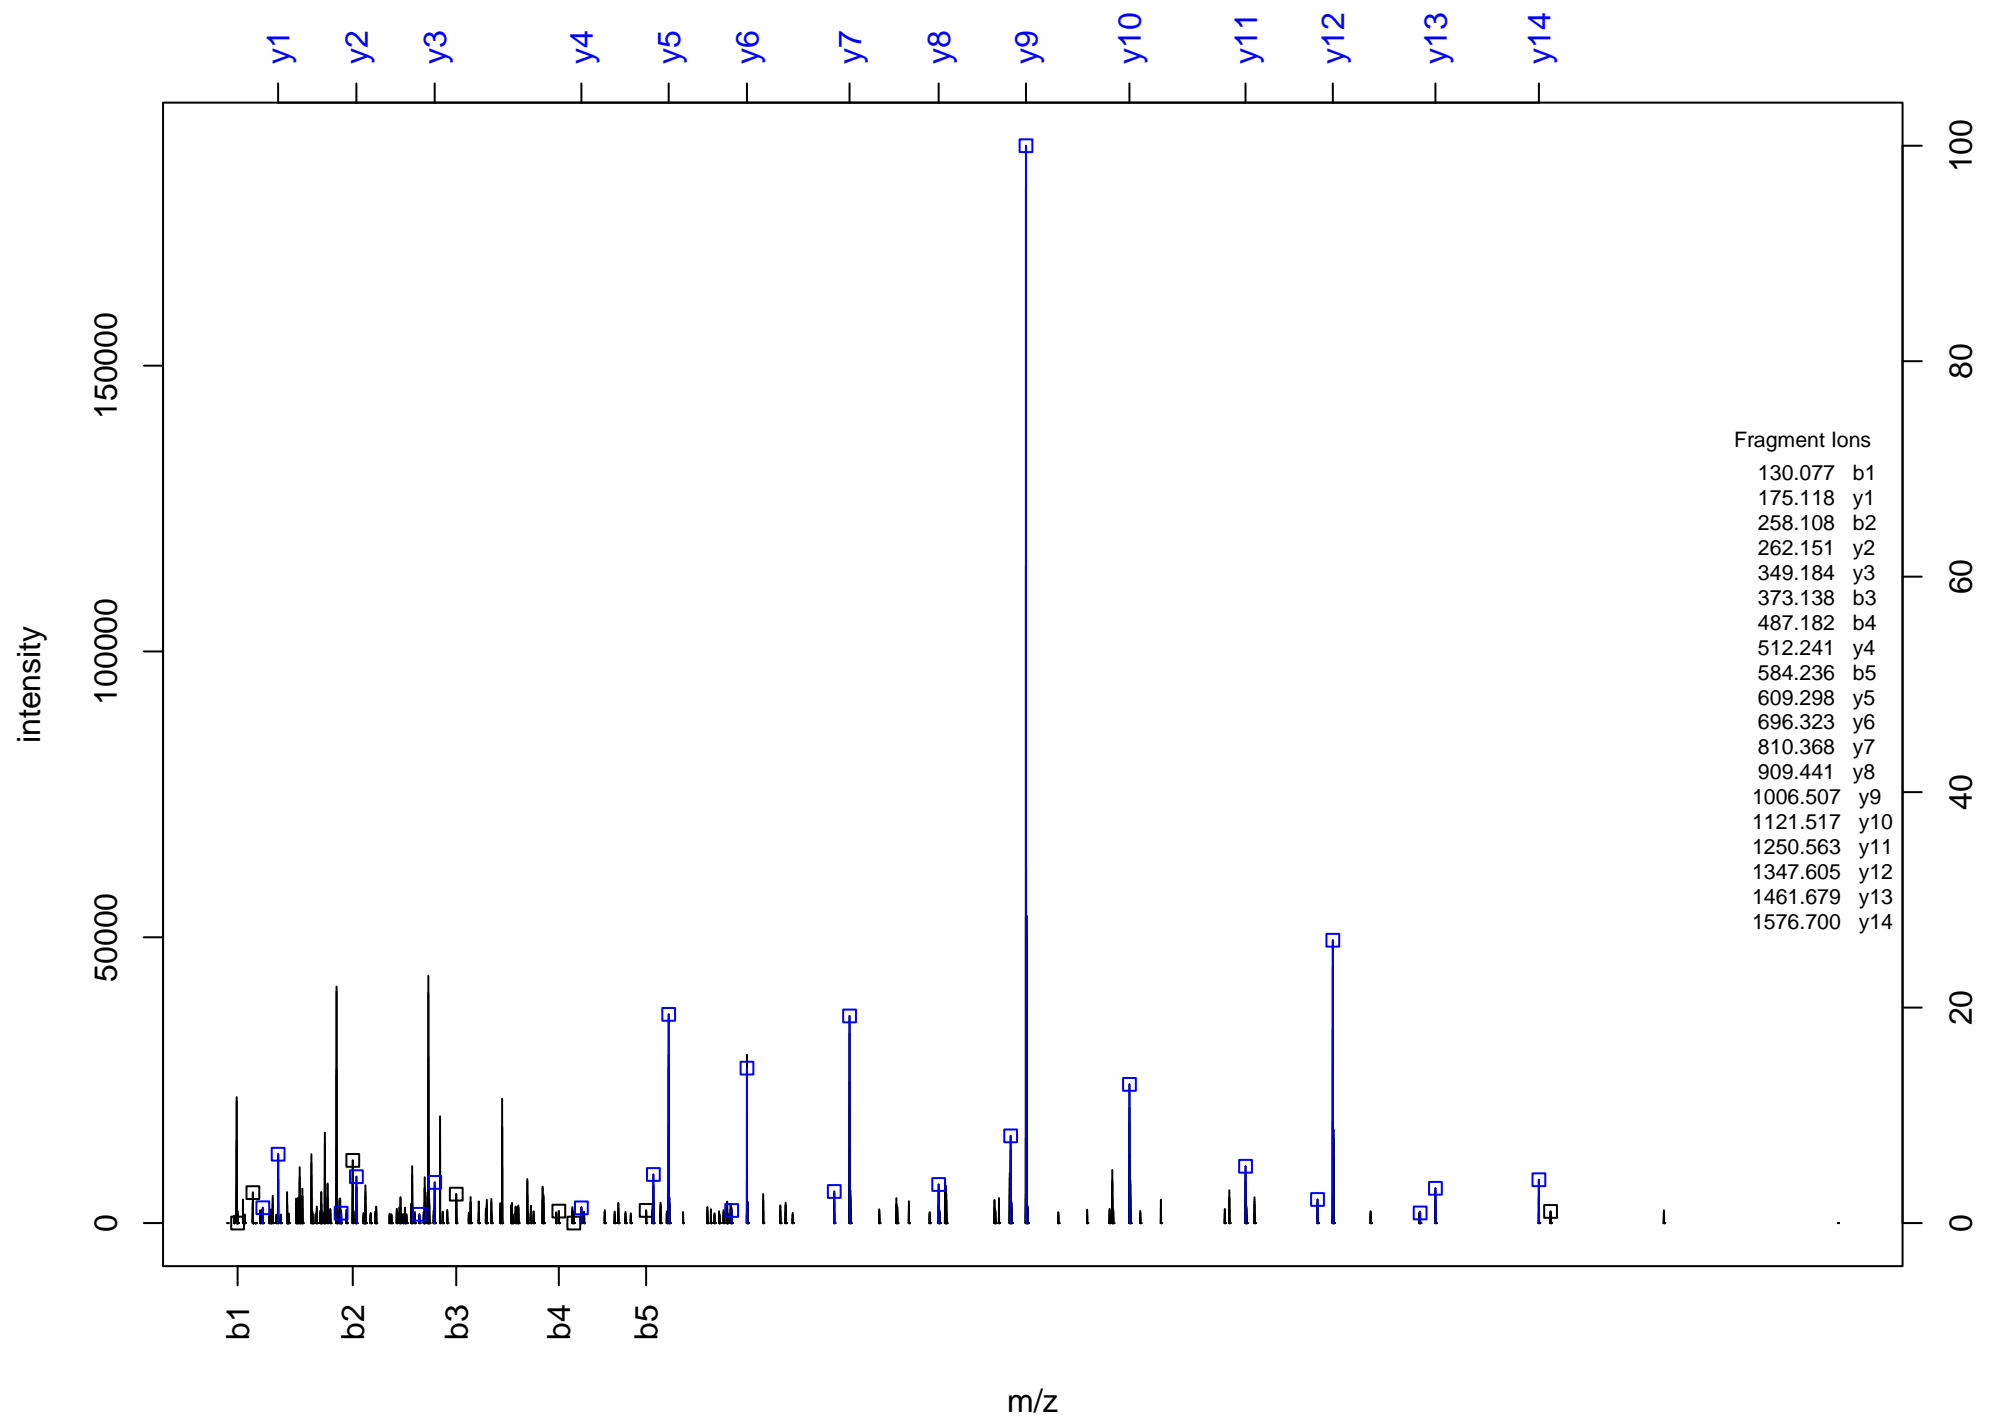

# VLPPVSTEGGLTPDDVPALADSVR

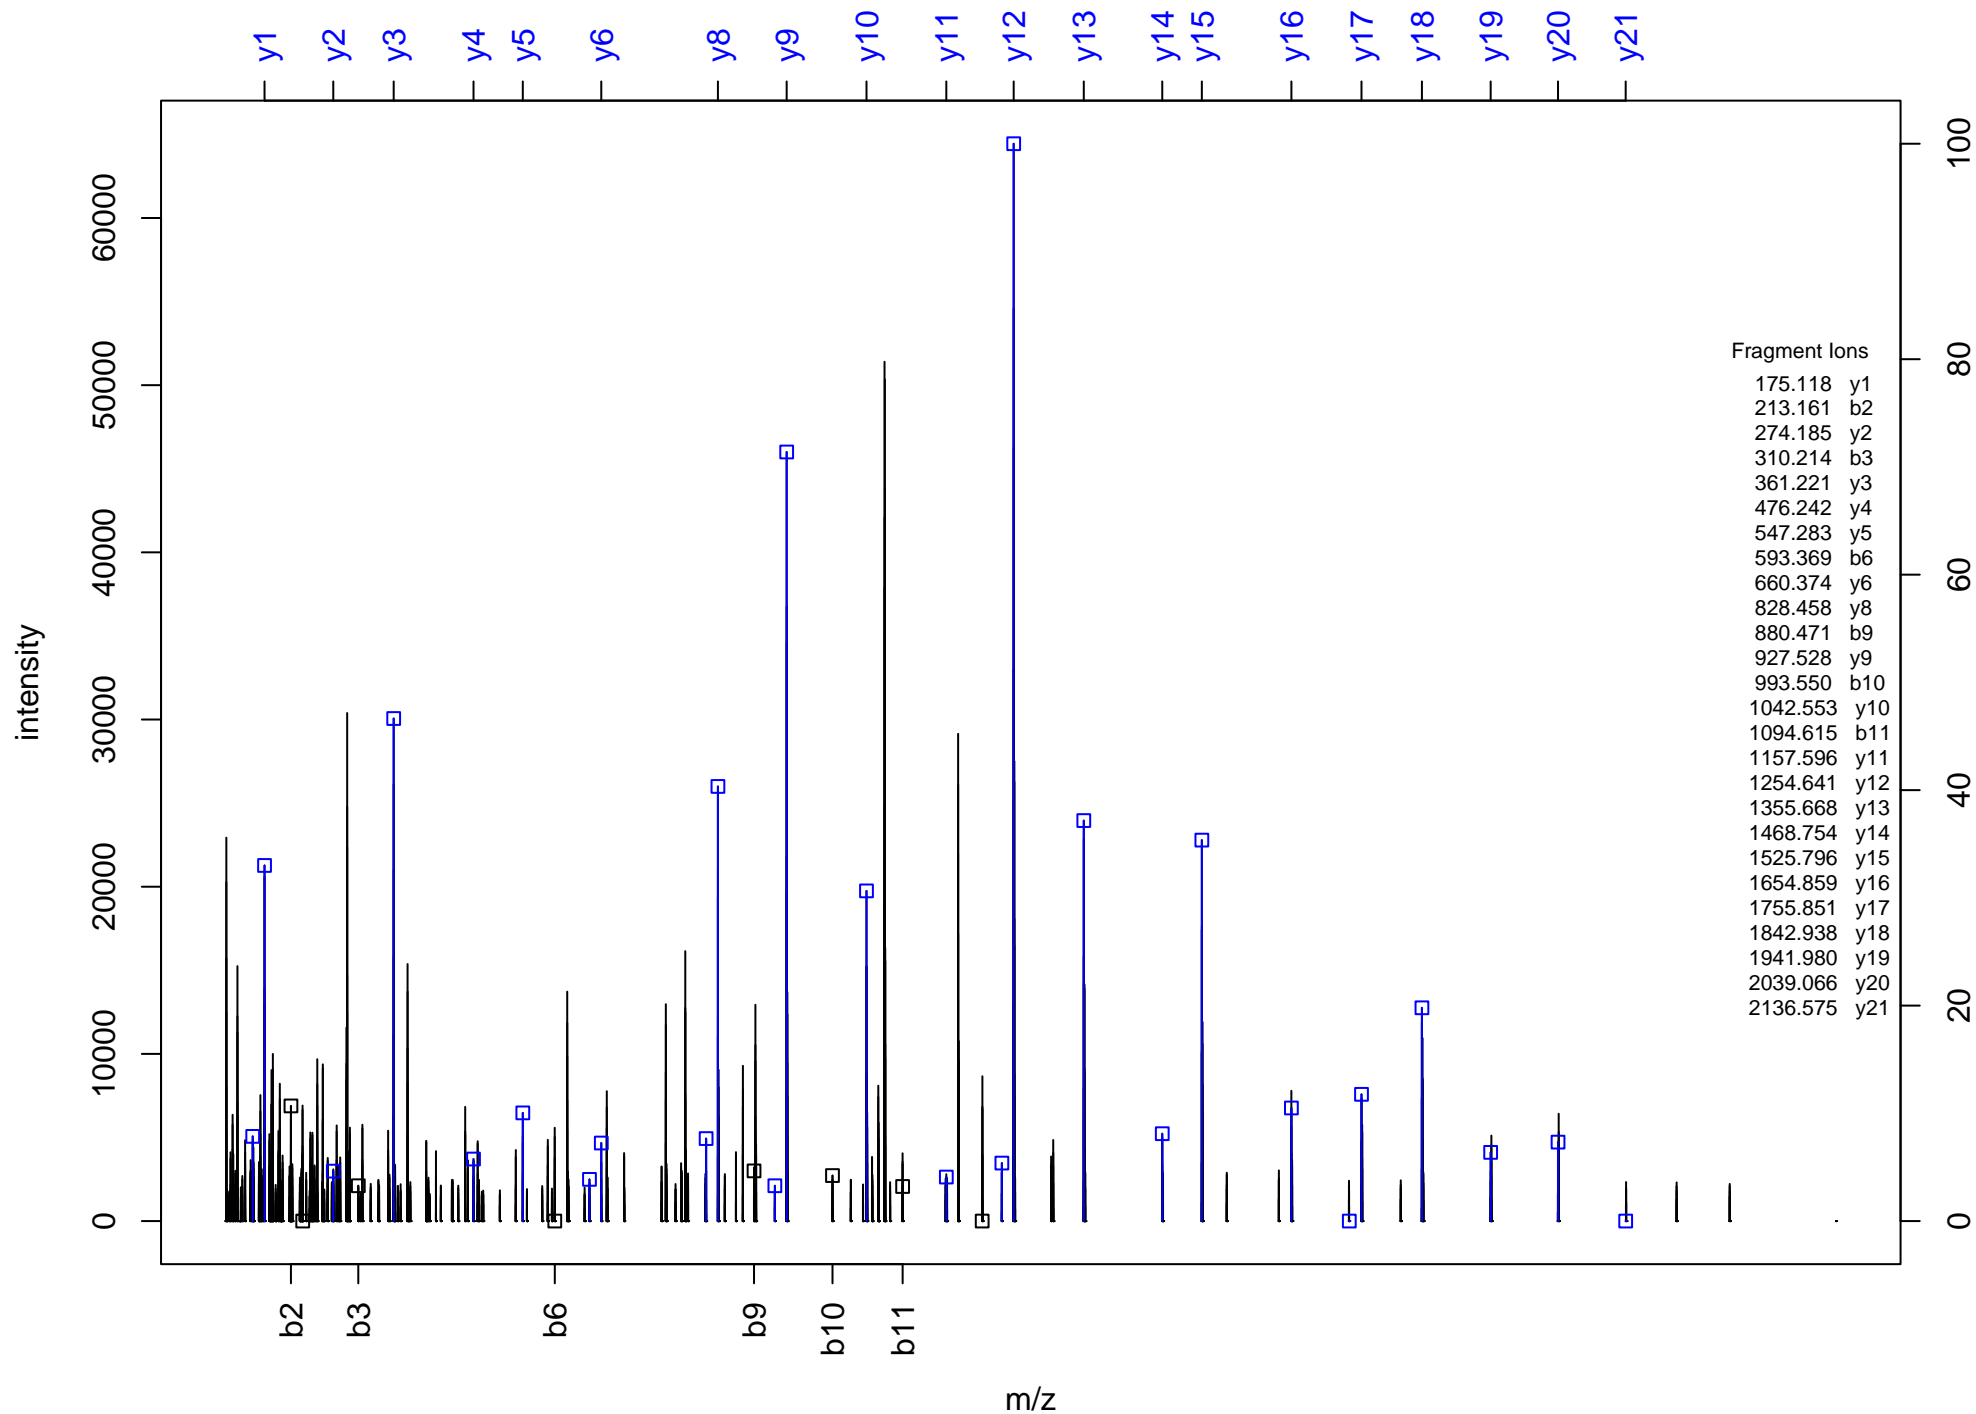

# LTYTPIFNEYISLVEK

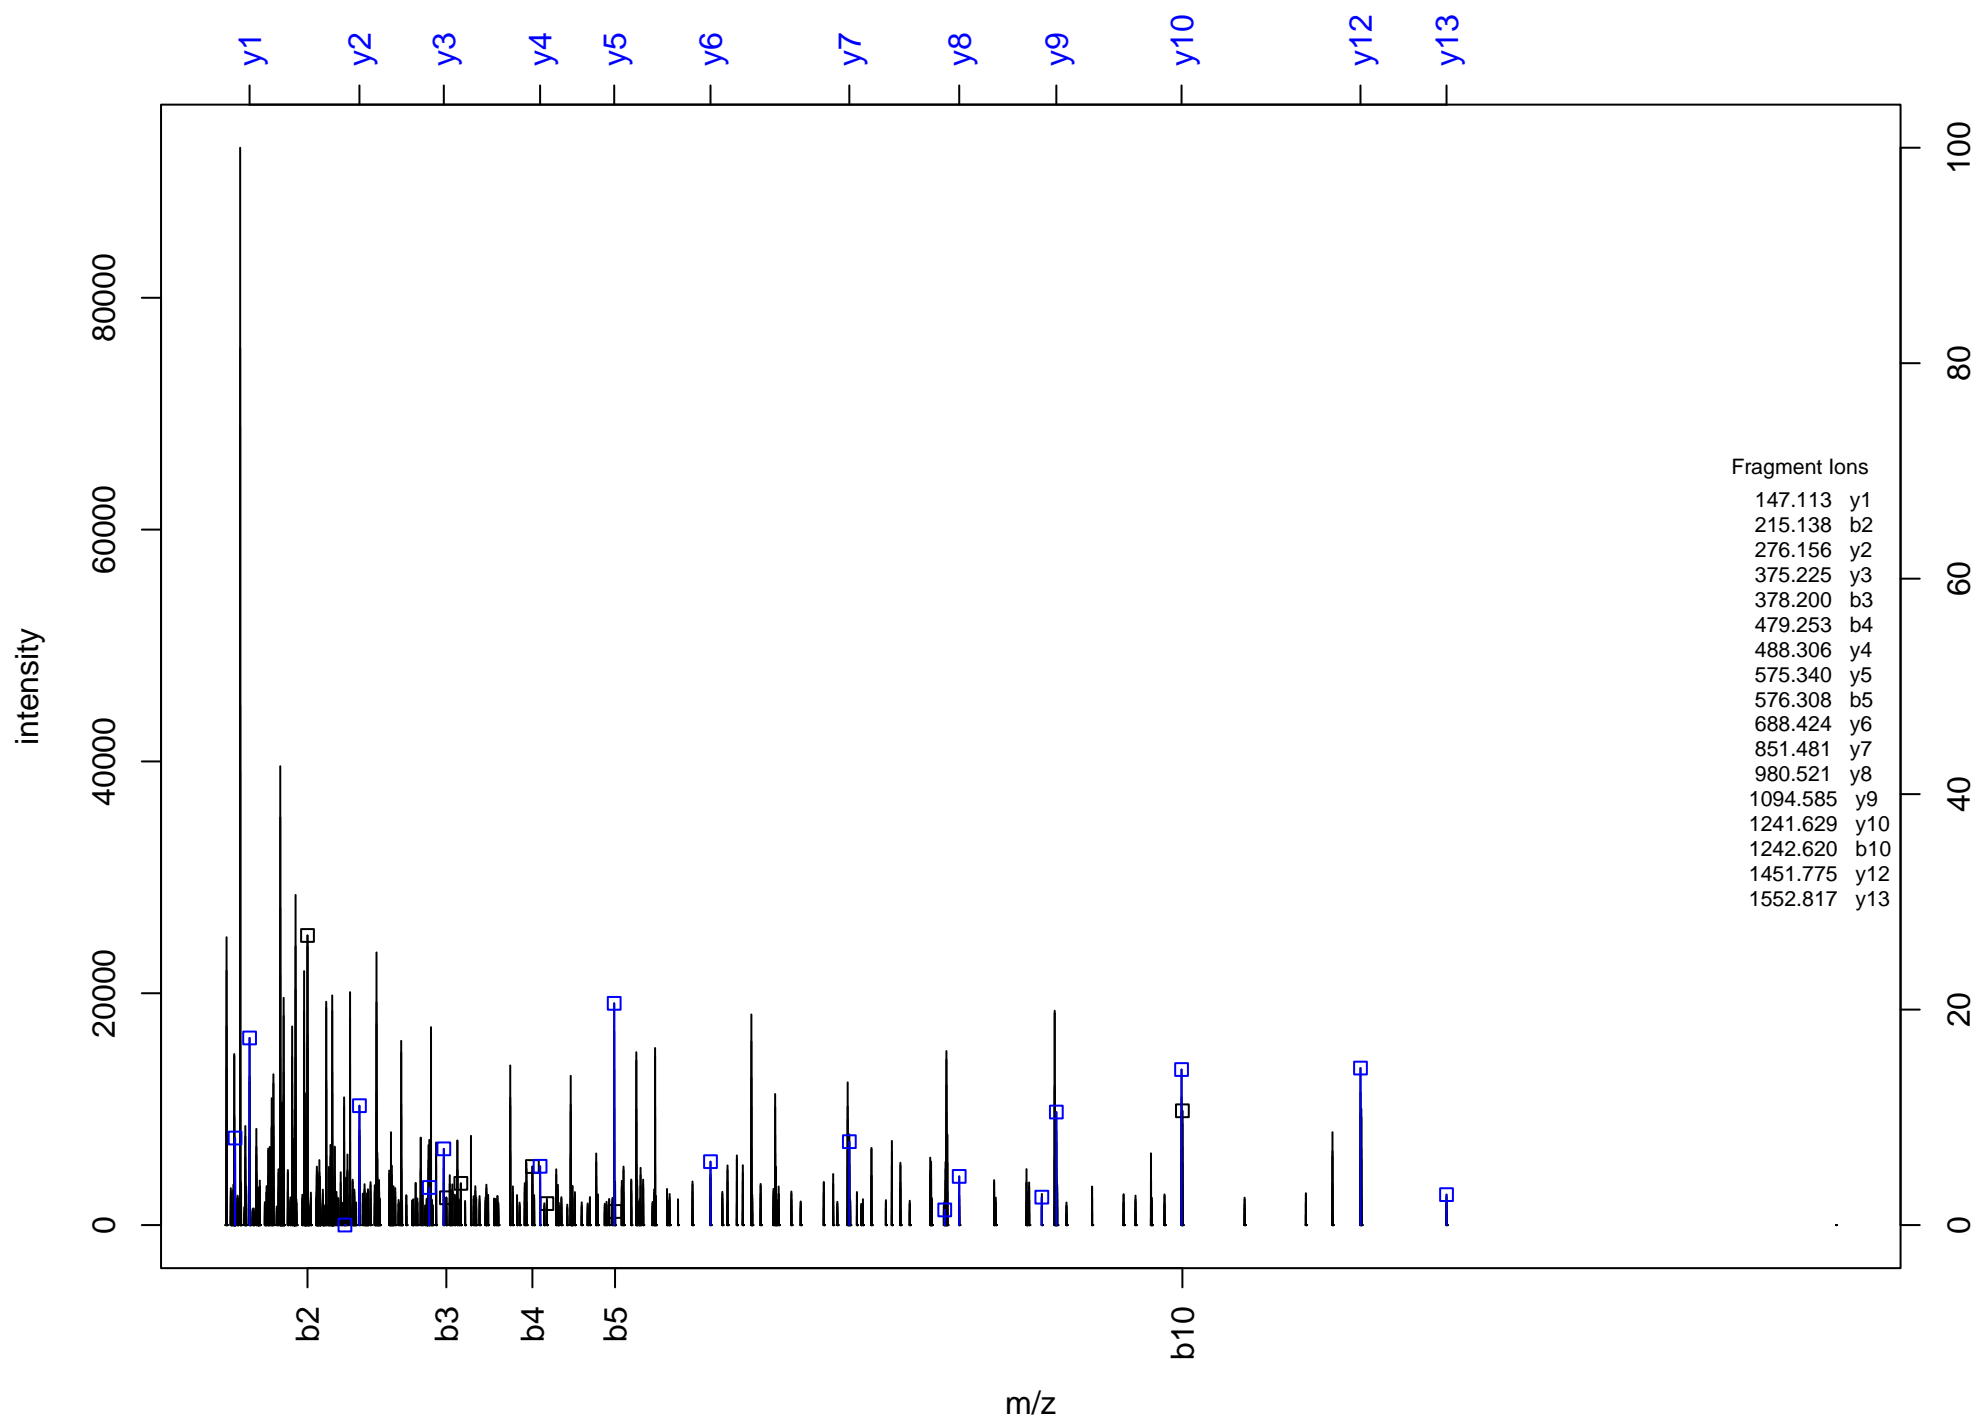

# VPIVIQDDSLPTGPPPQIR

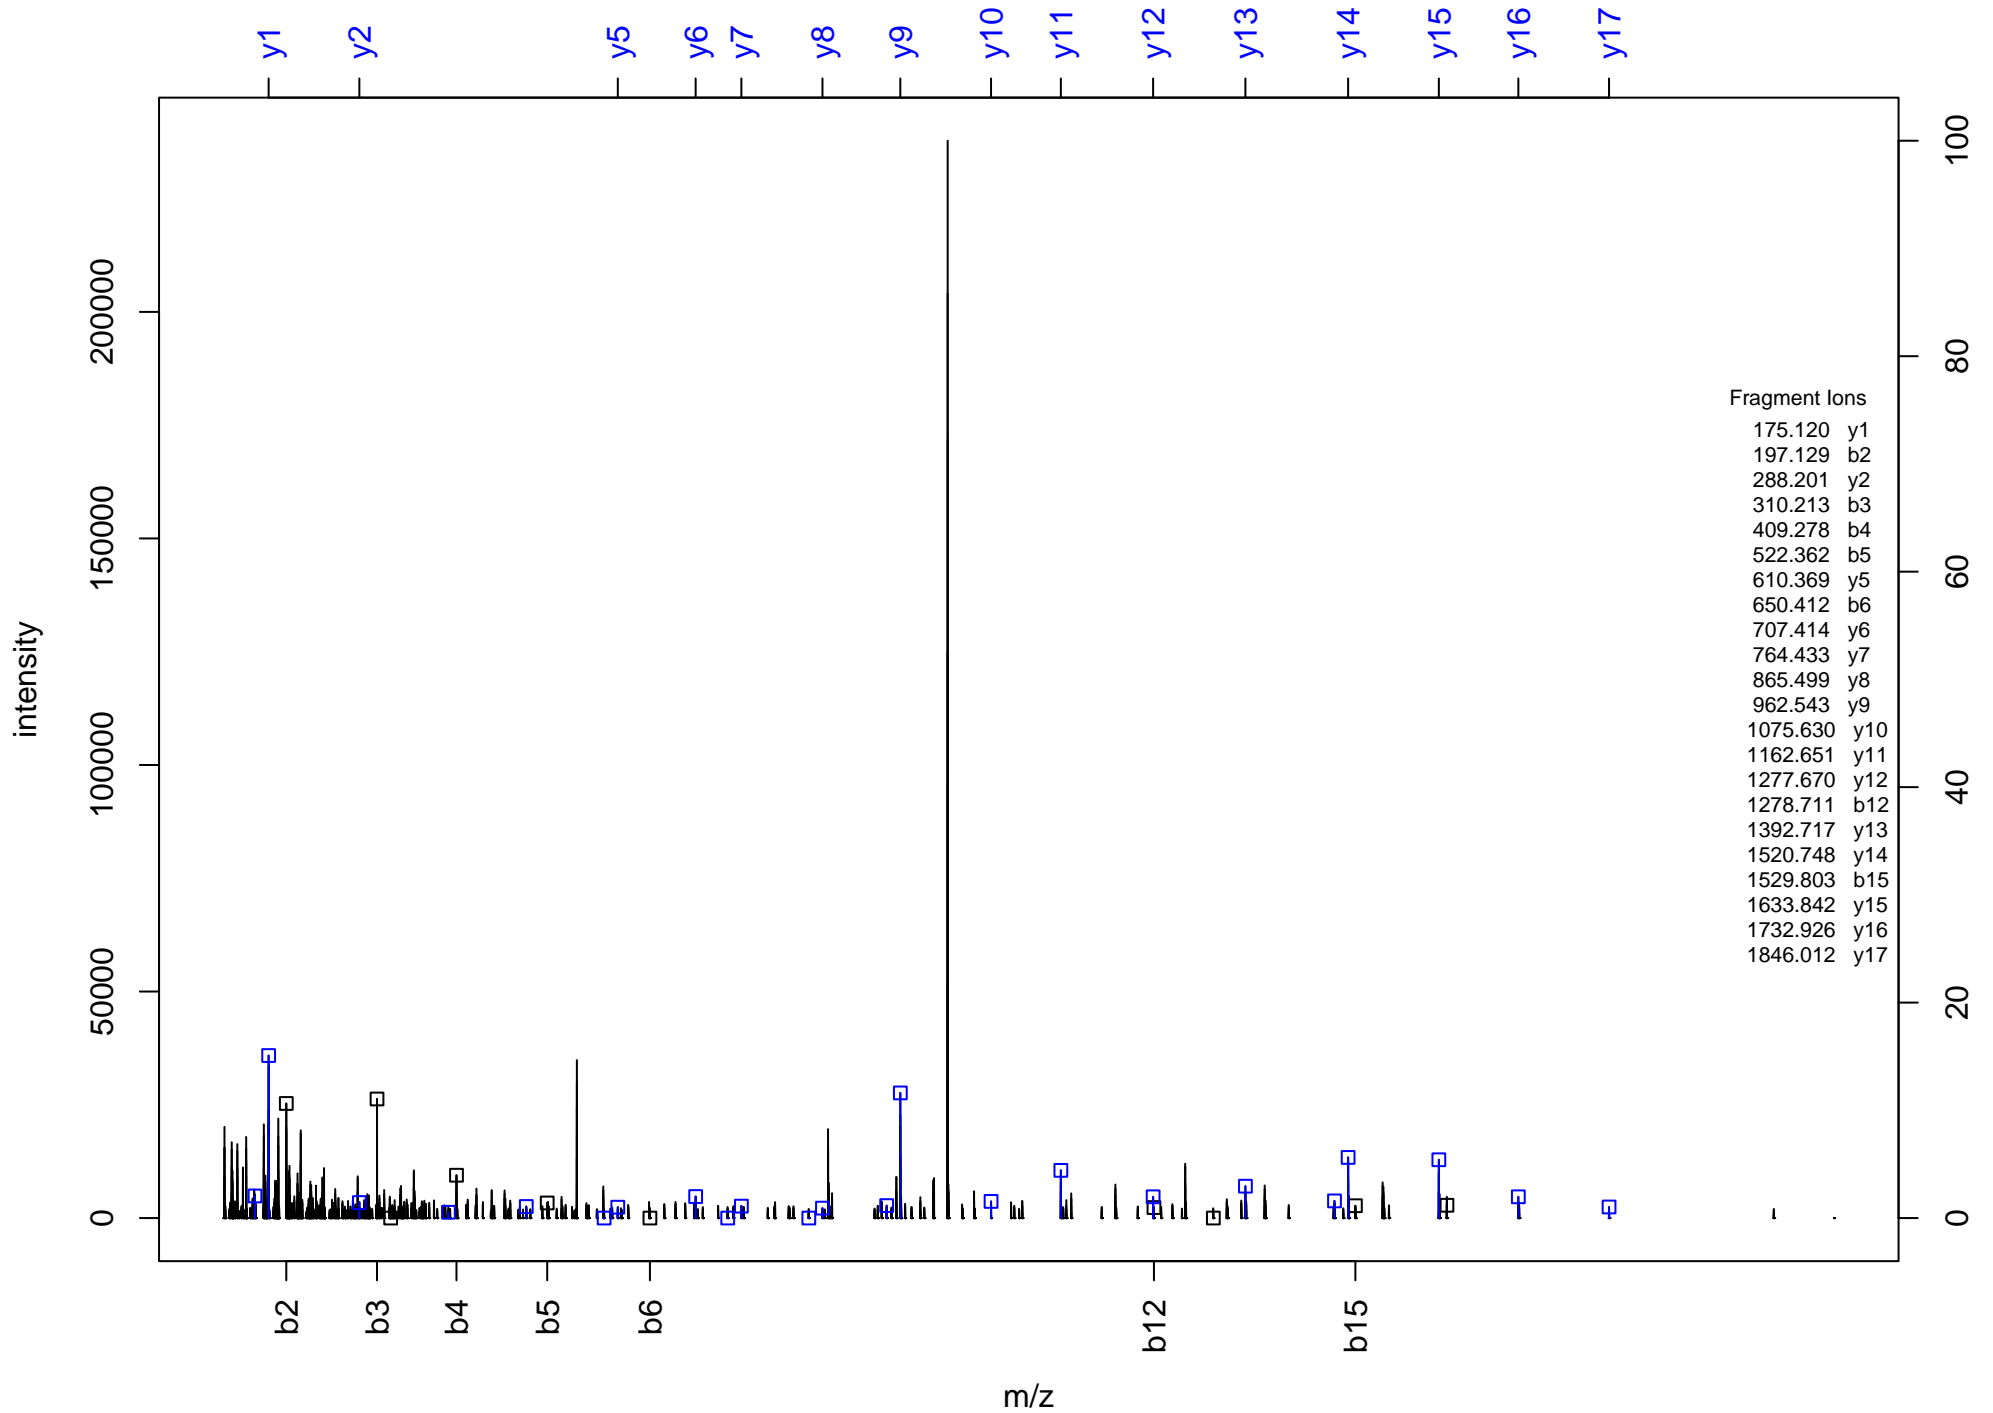



# LFYN<sup>+</sup>SSAEQ<sup>+</sup>IWITVLQ<sup>+</sup>CR

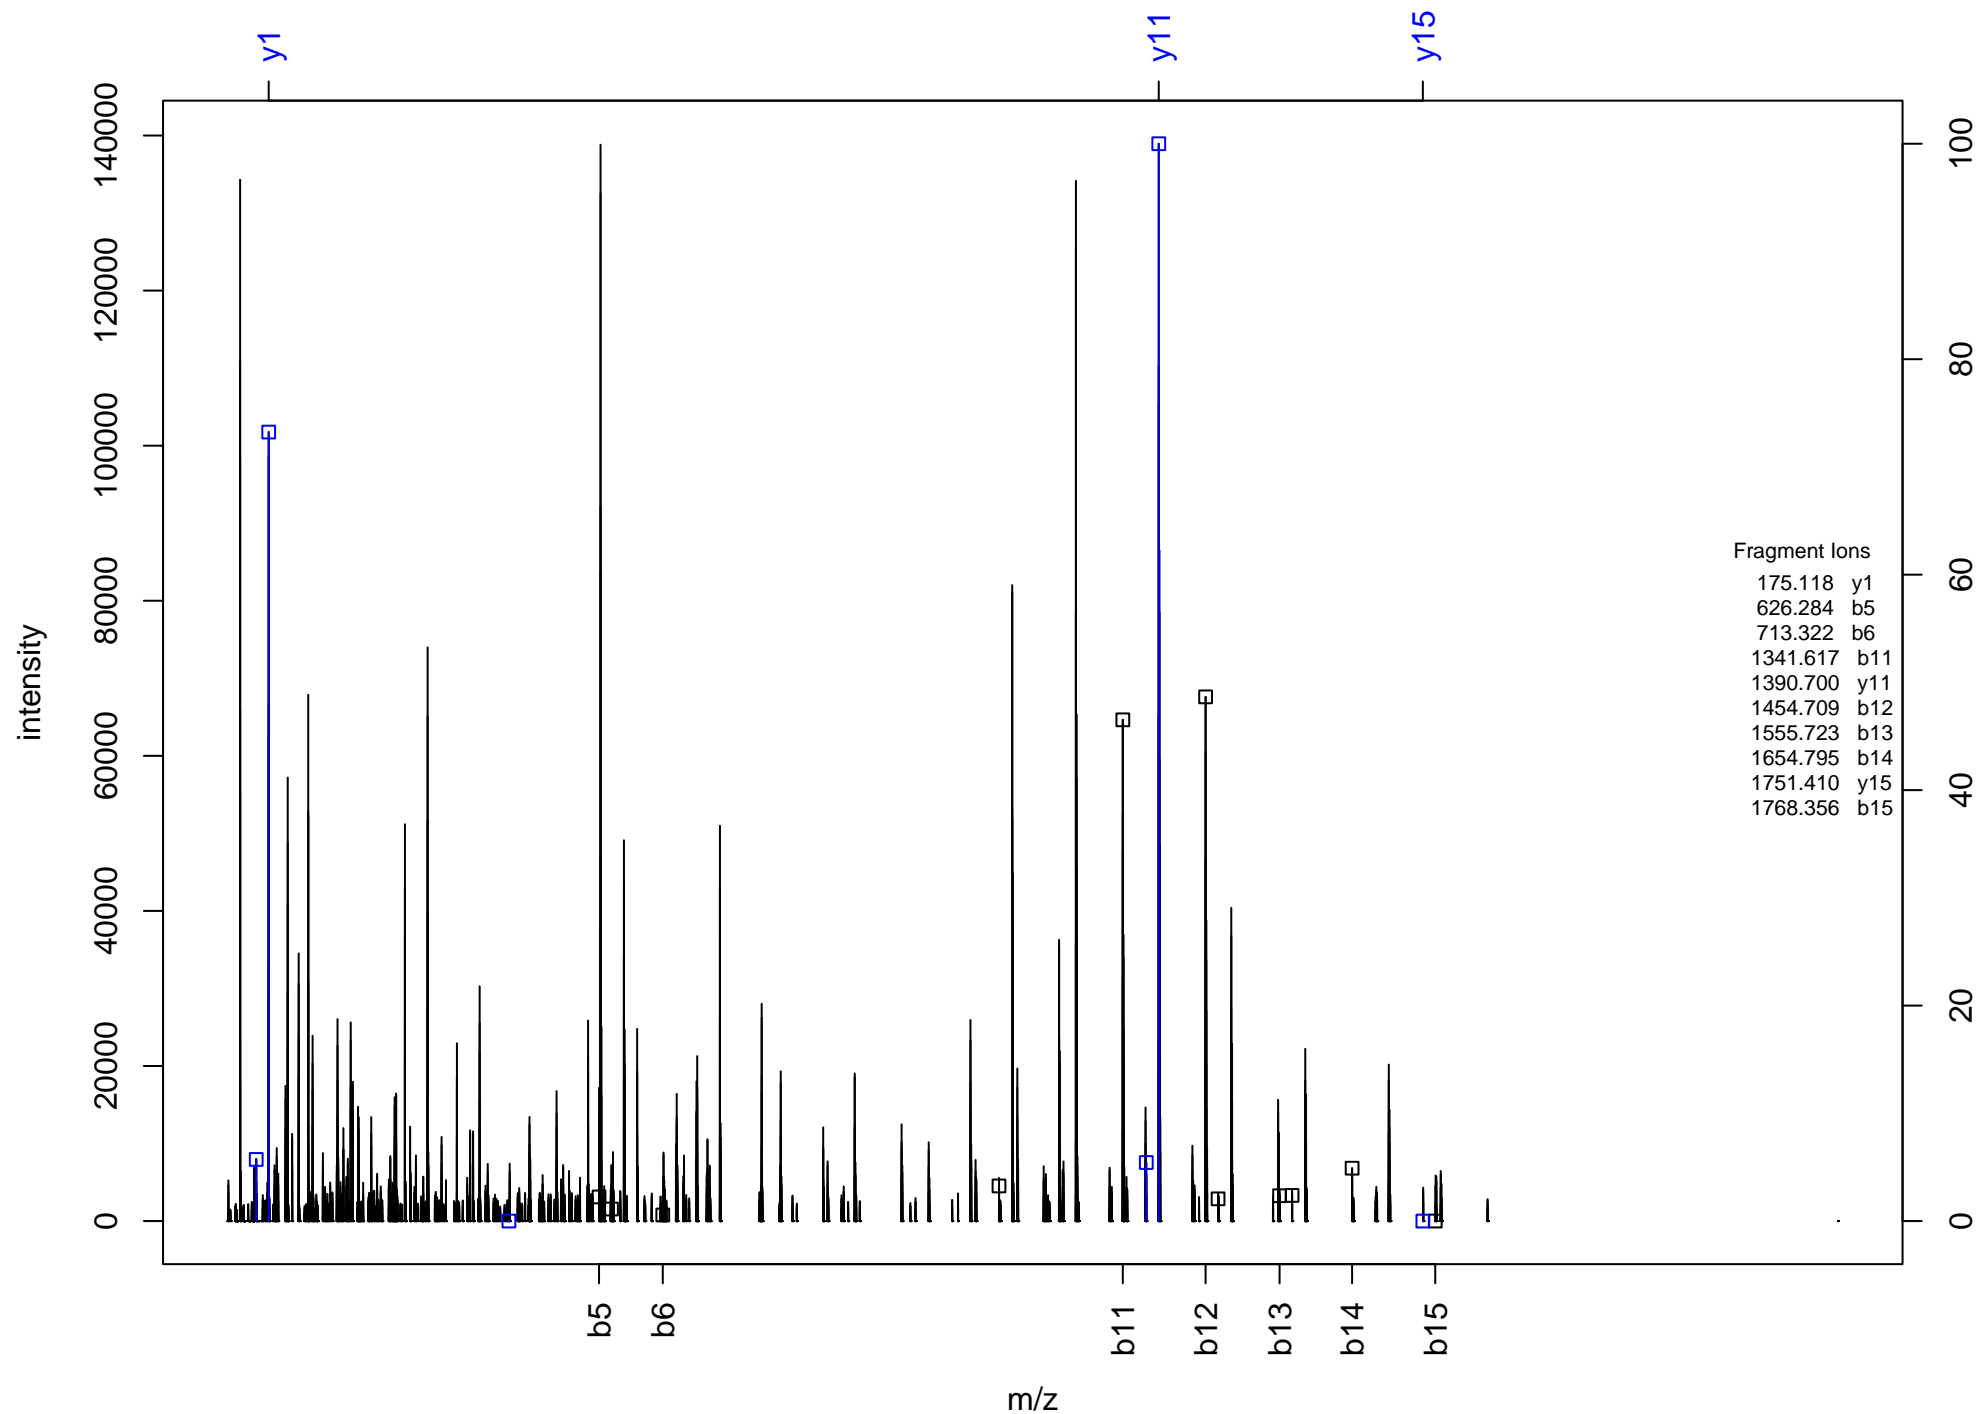

# AATITATSPGALWGLDR

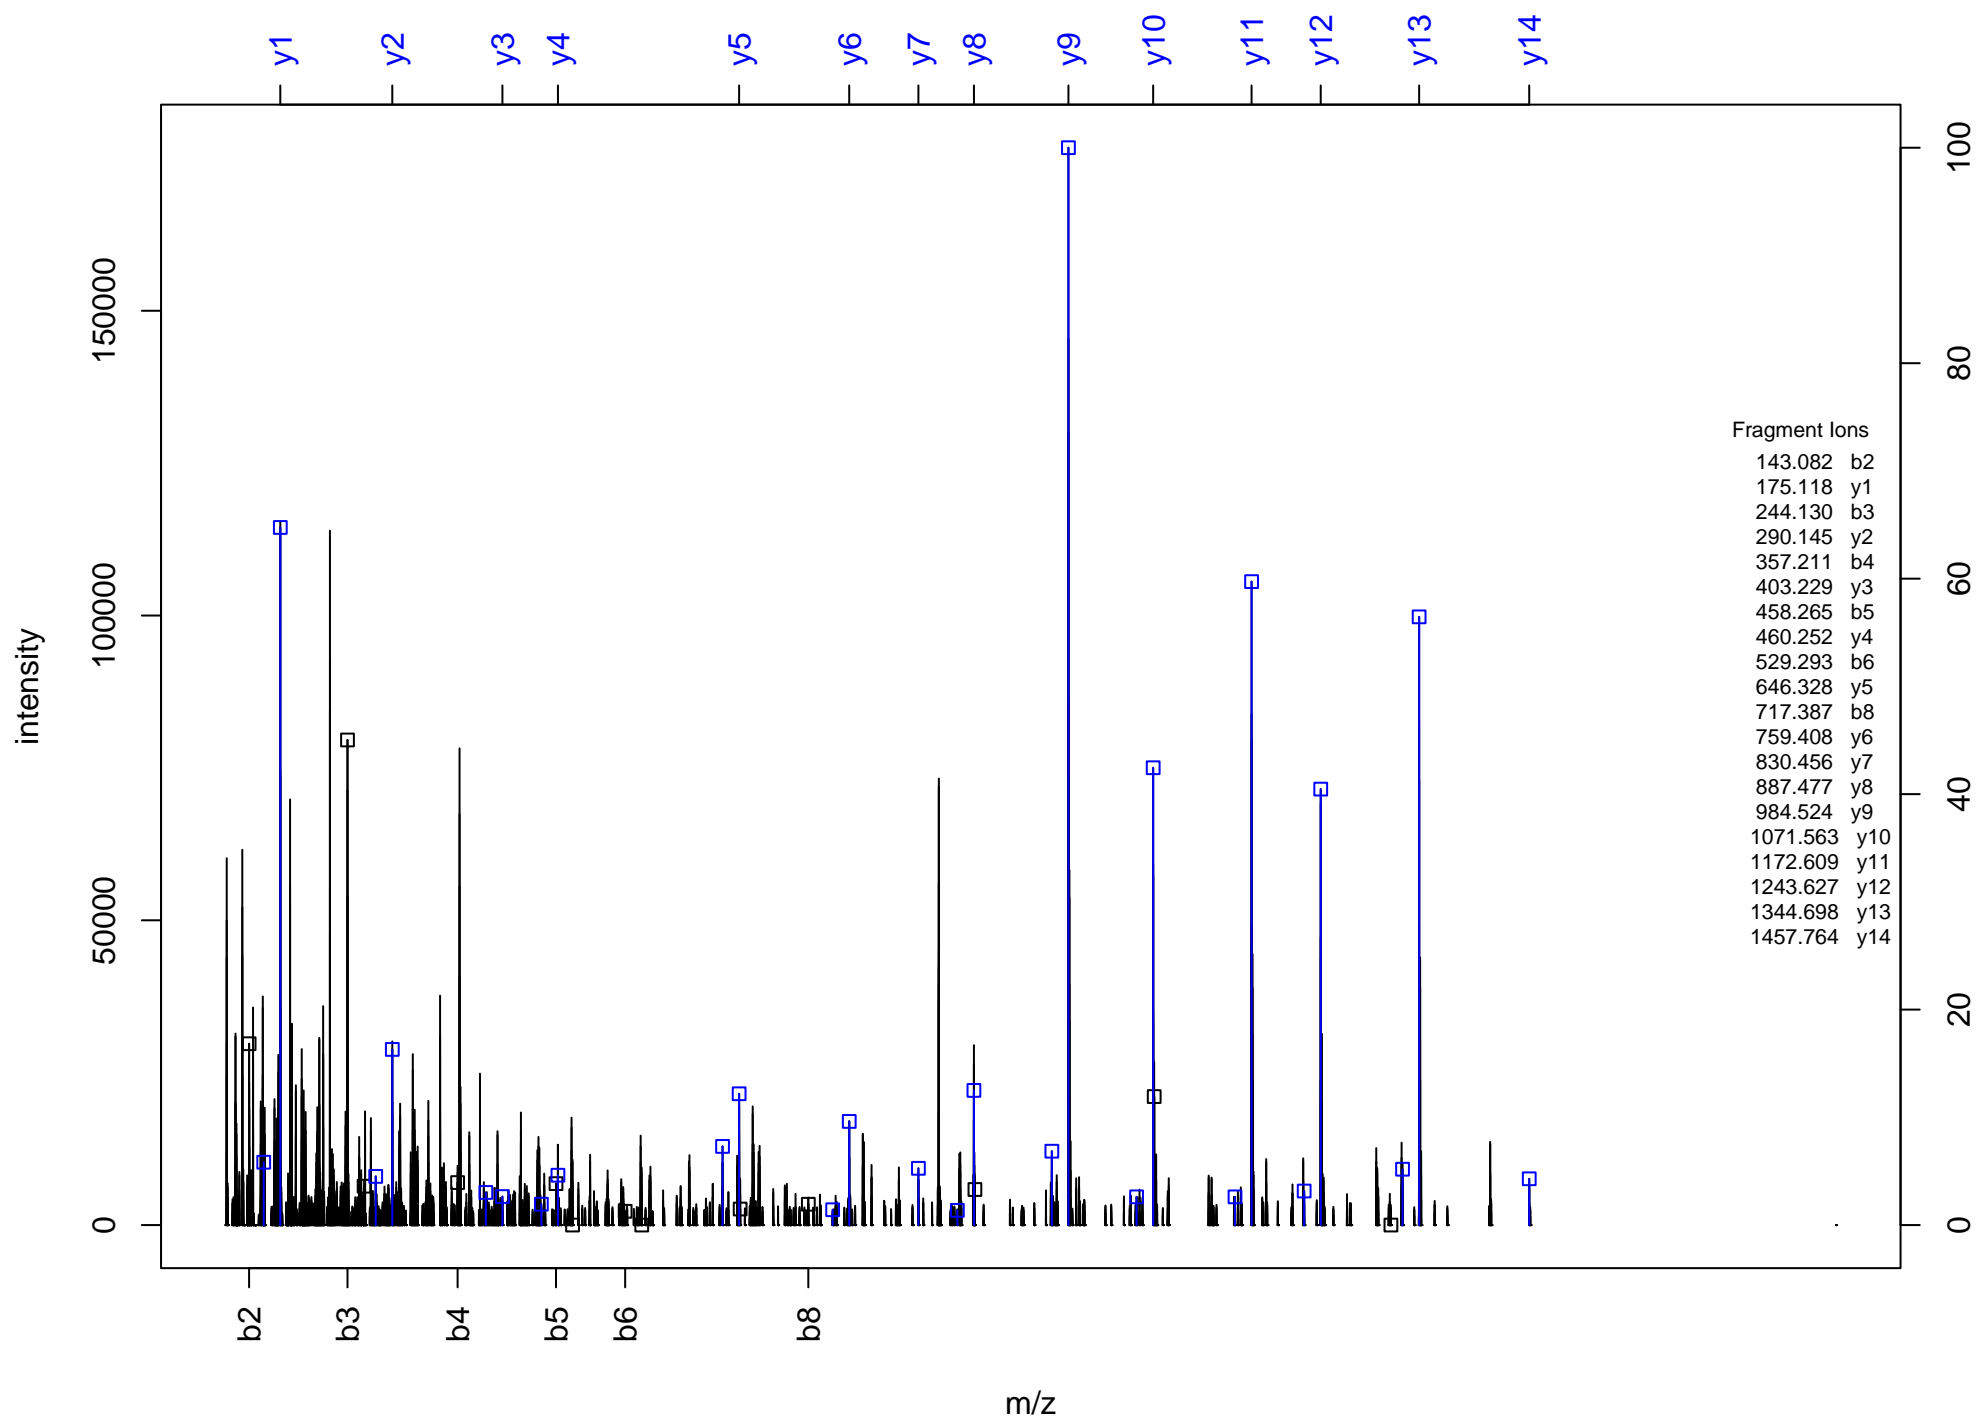

# DNILDALDLN^N^N^Q^R

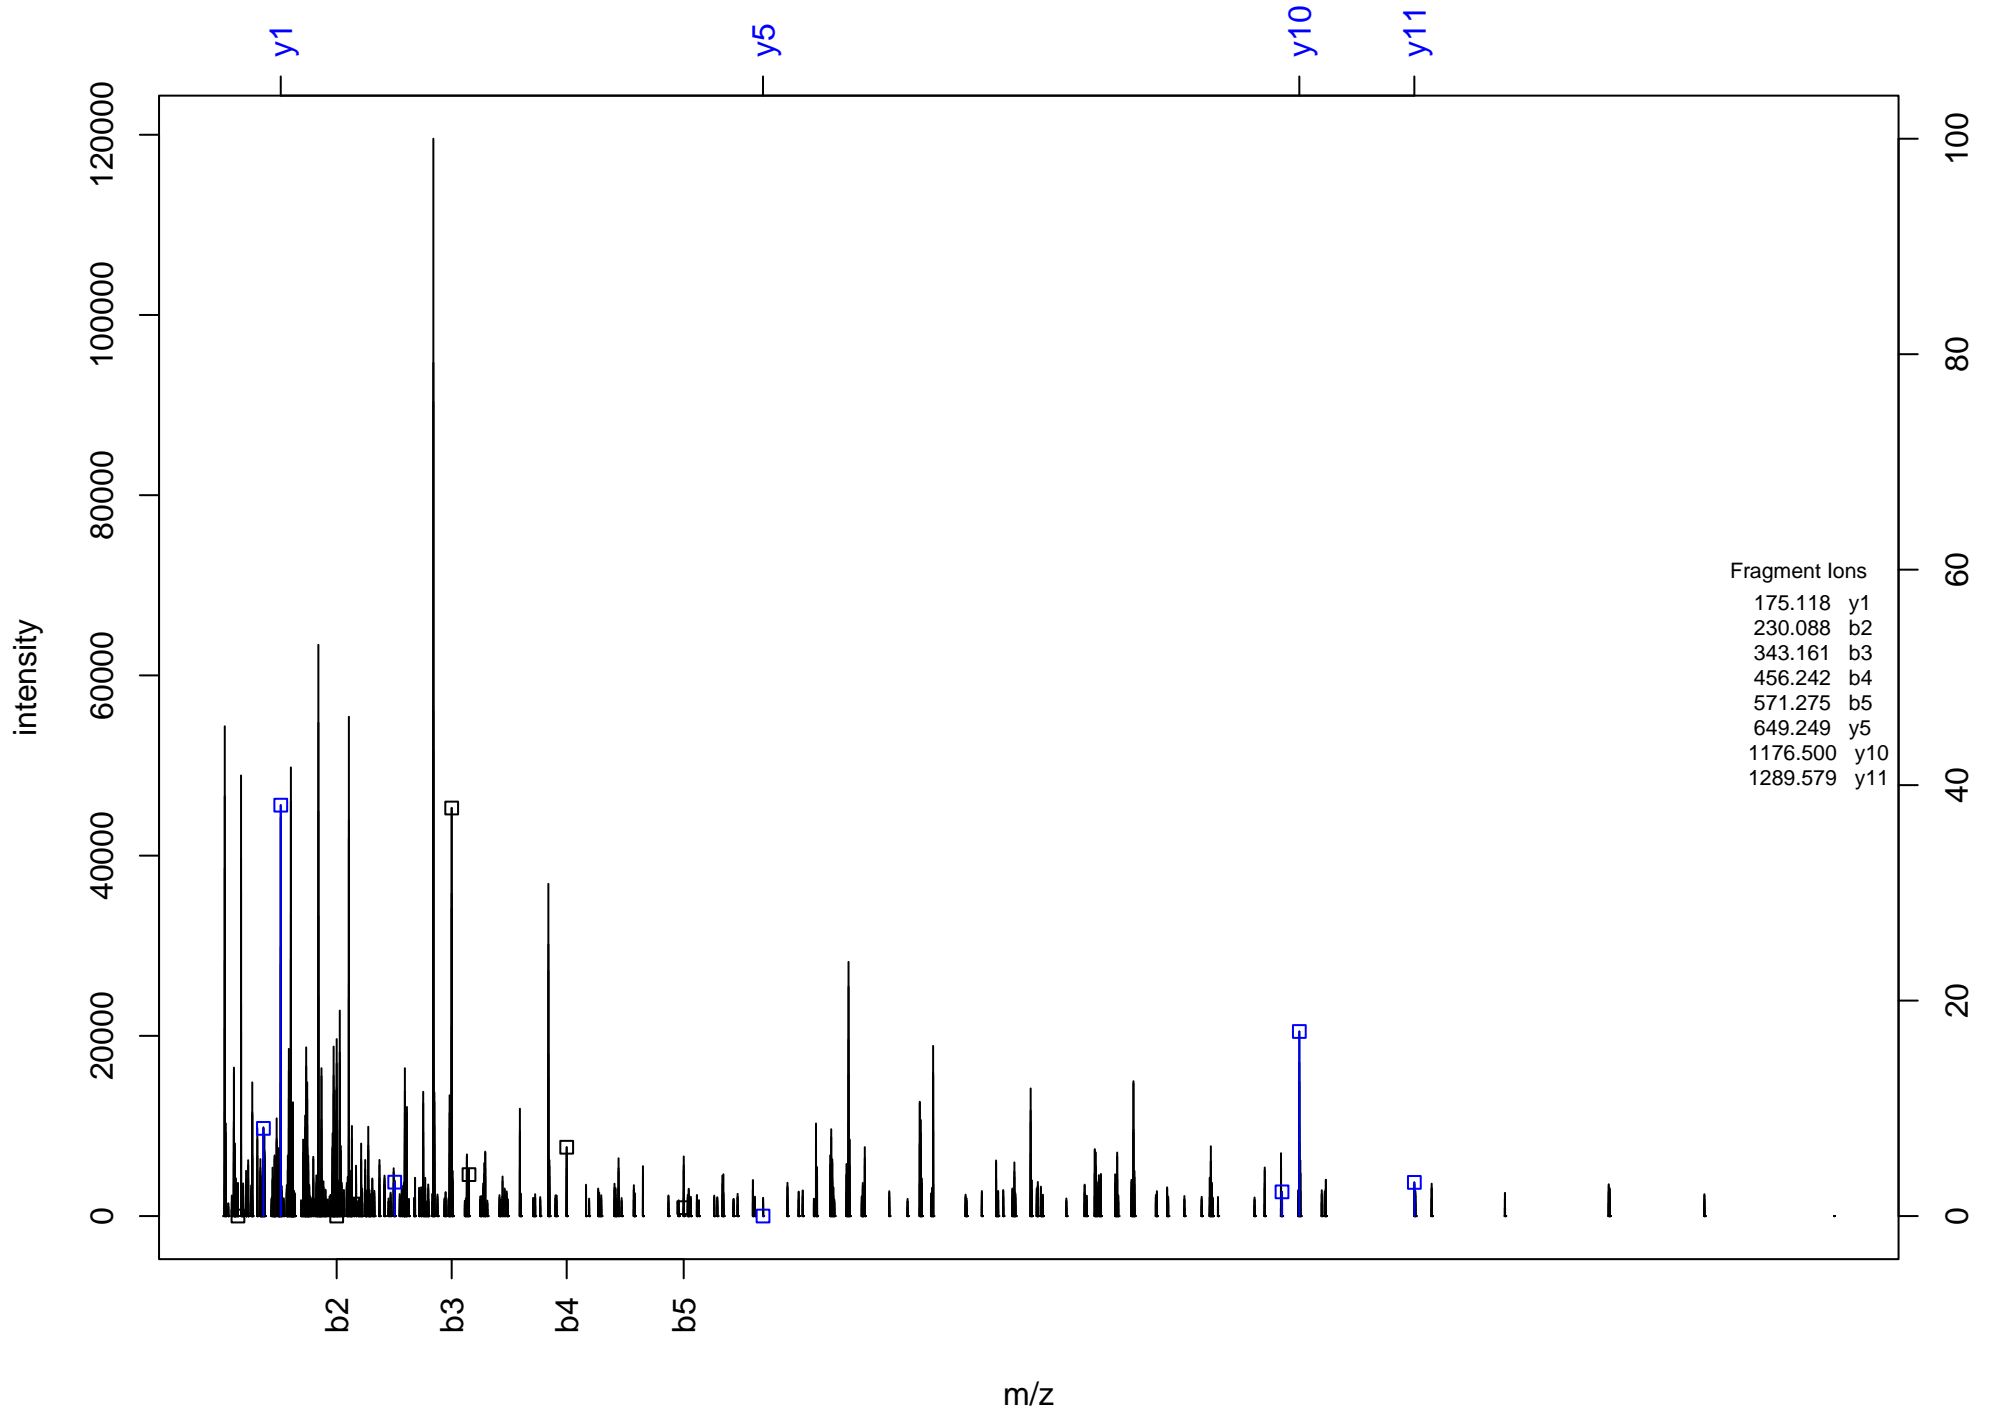

(Ac)N<sup>^</sup>GKTRLM\*Q<sup>^</sup>WR

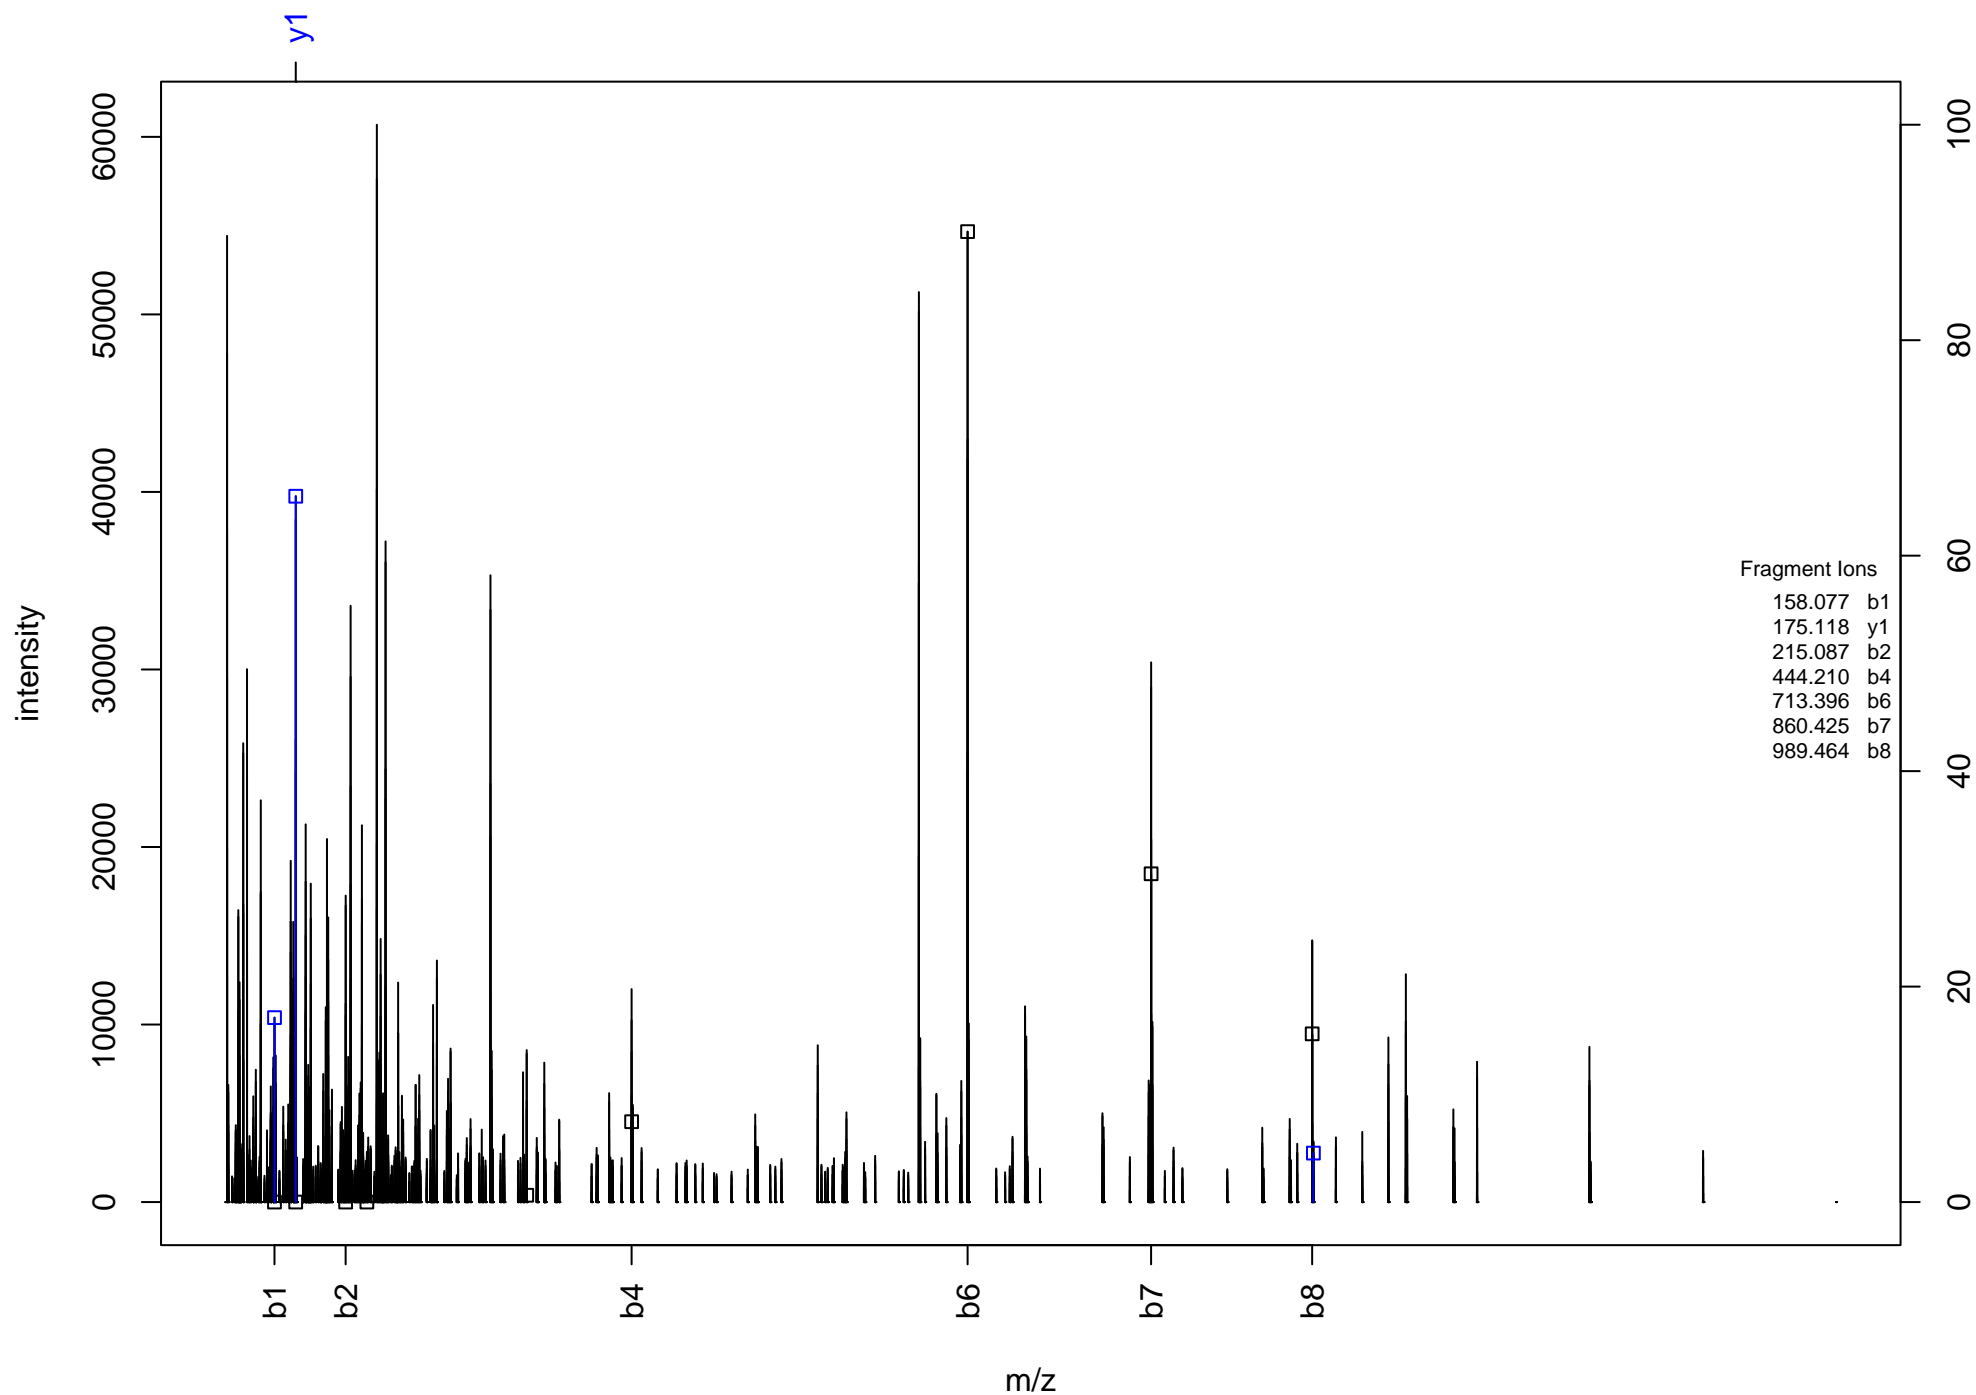

# (Ac)SAFNLLHLVTK

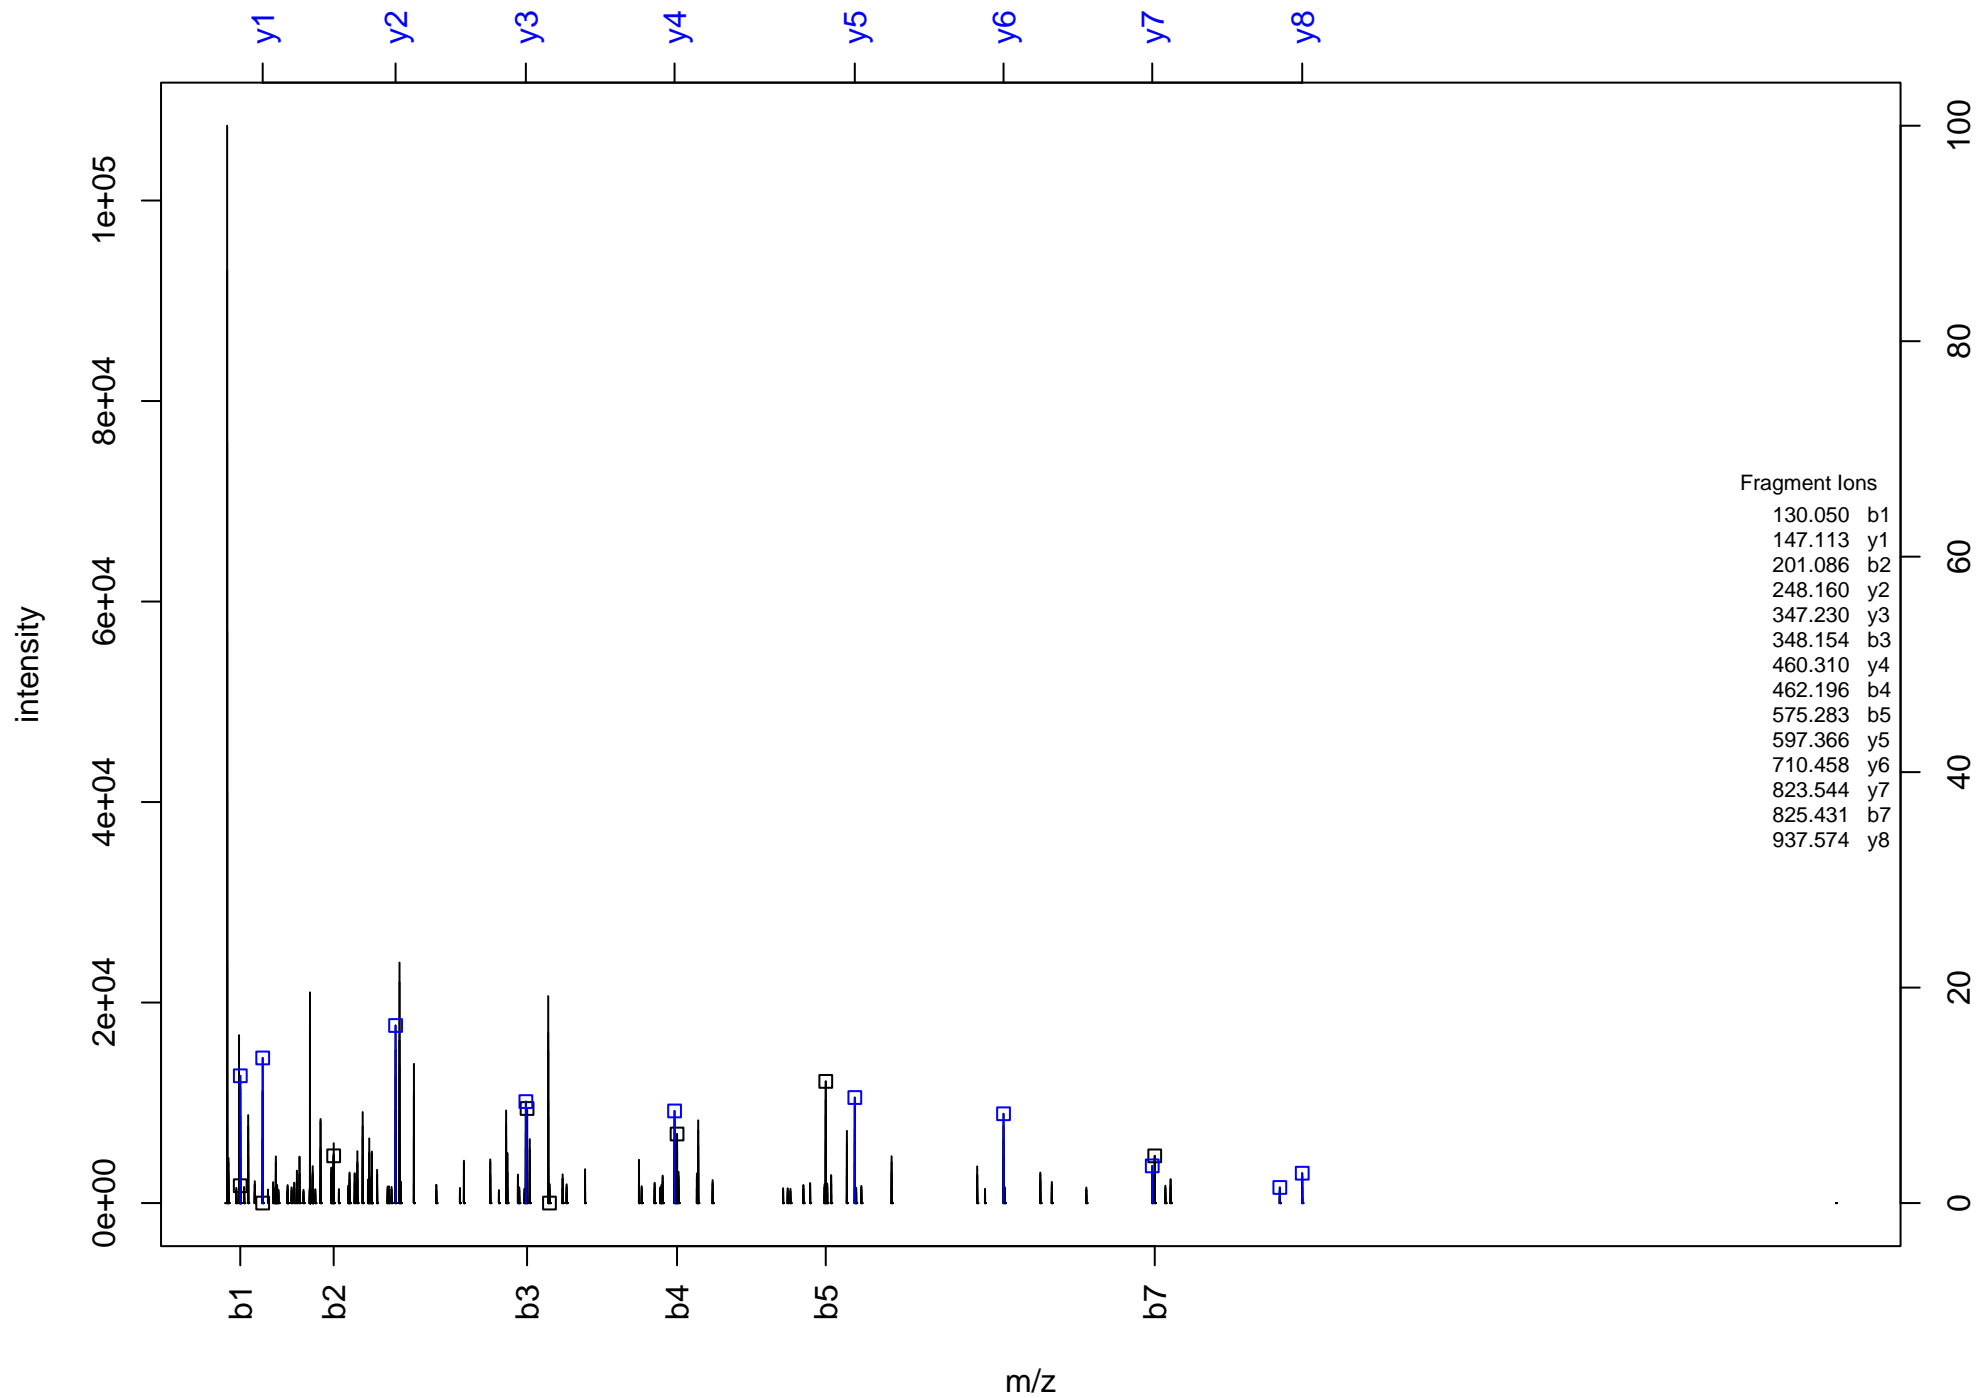

# LLDLLEGLTGTSLPK

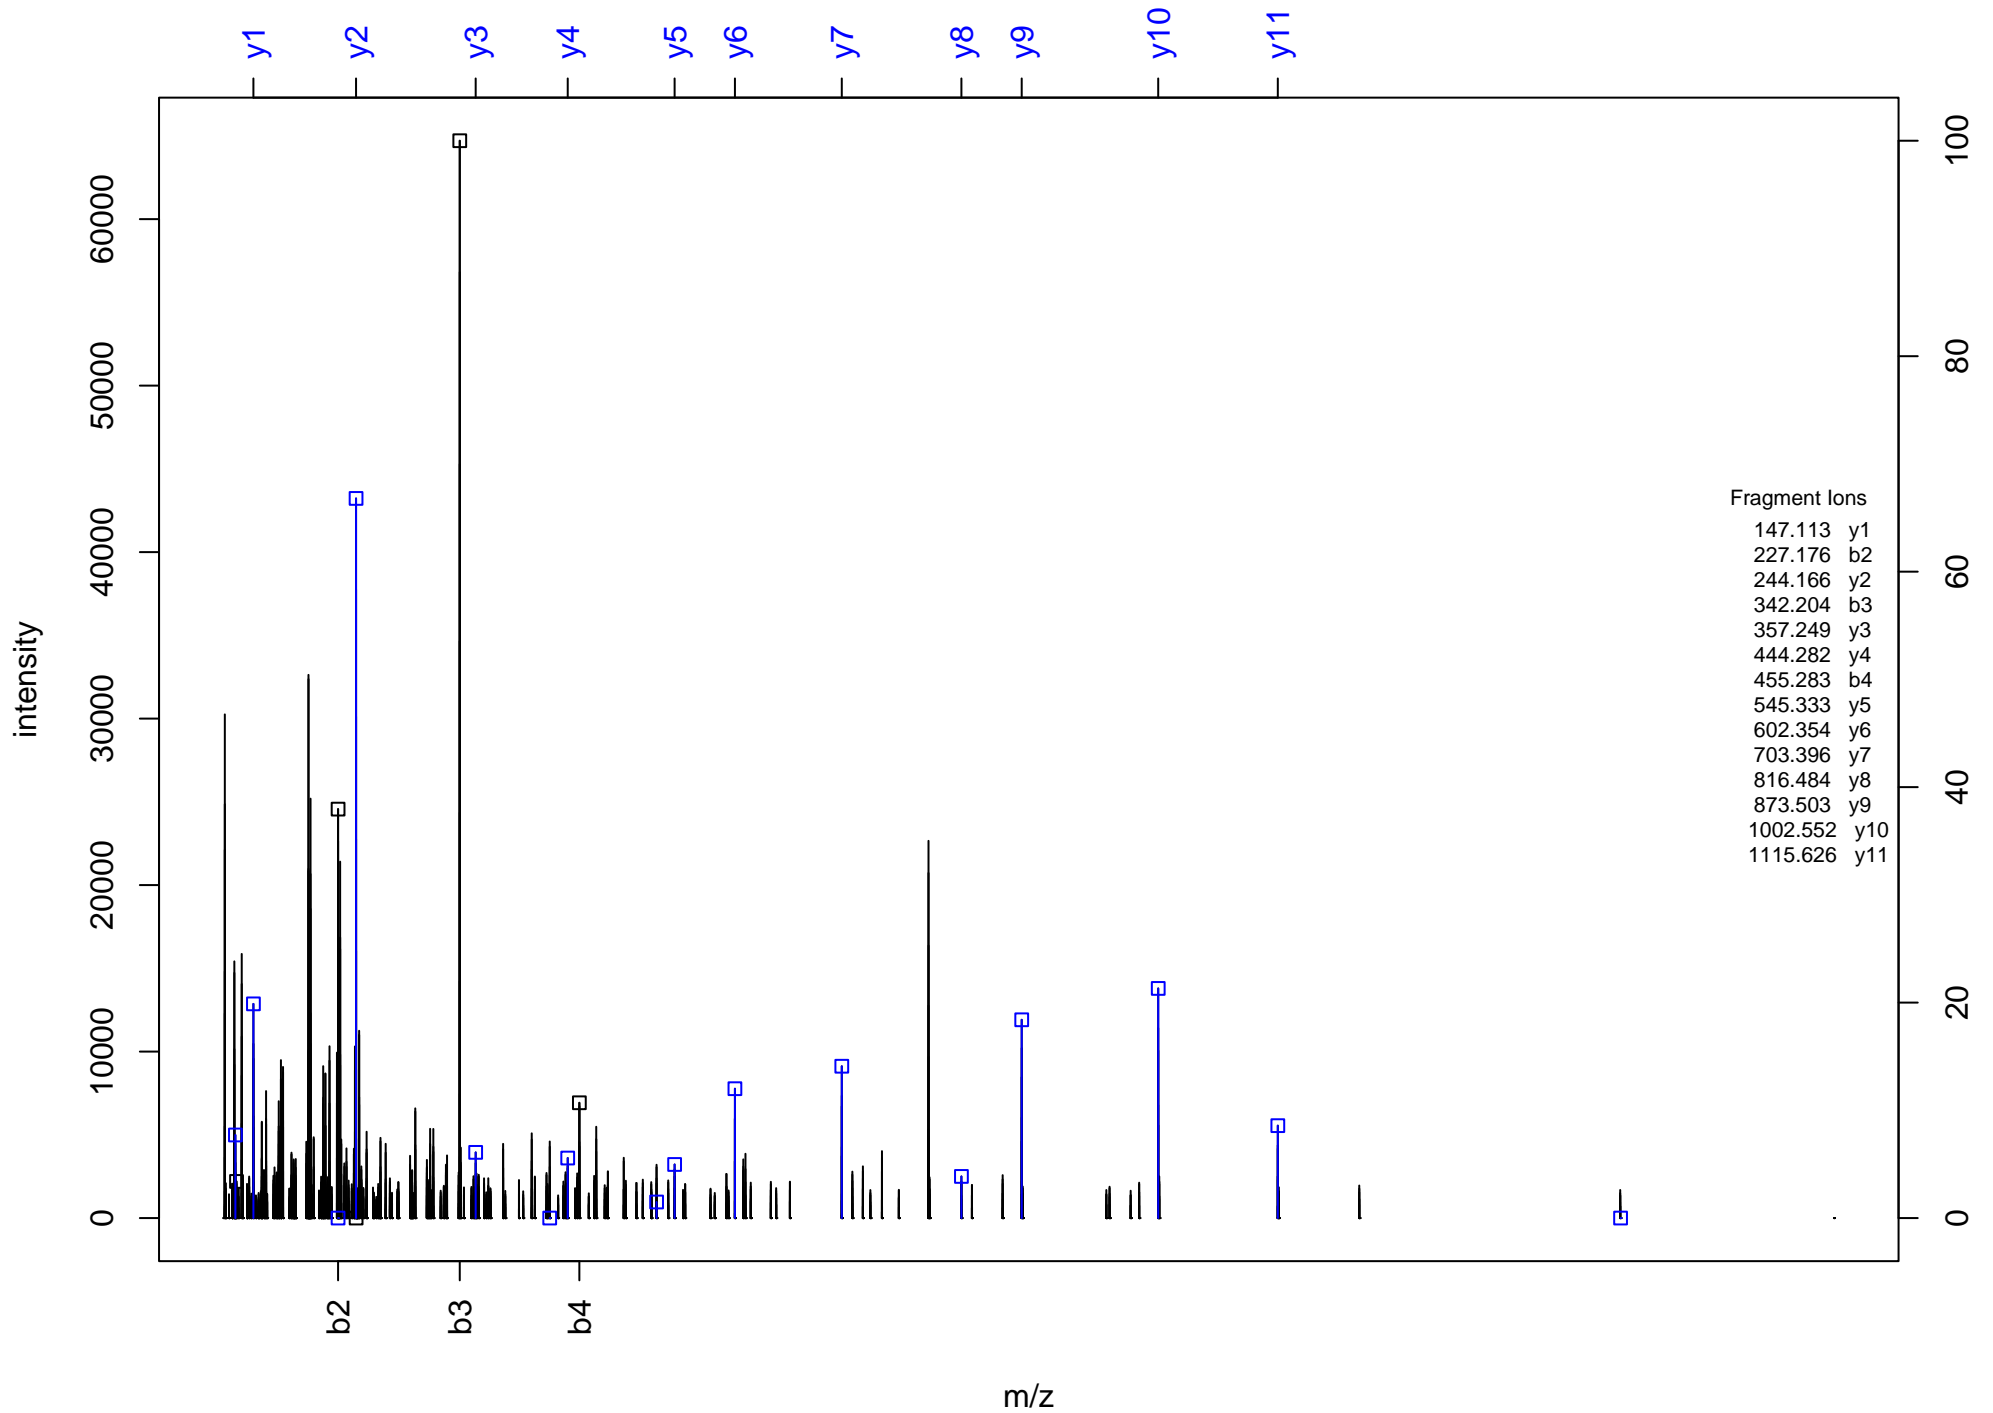

# LN<sup>+</sup>QFQHELQ<sup>+</sup>K

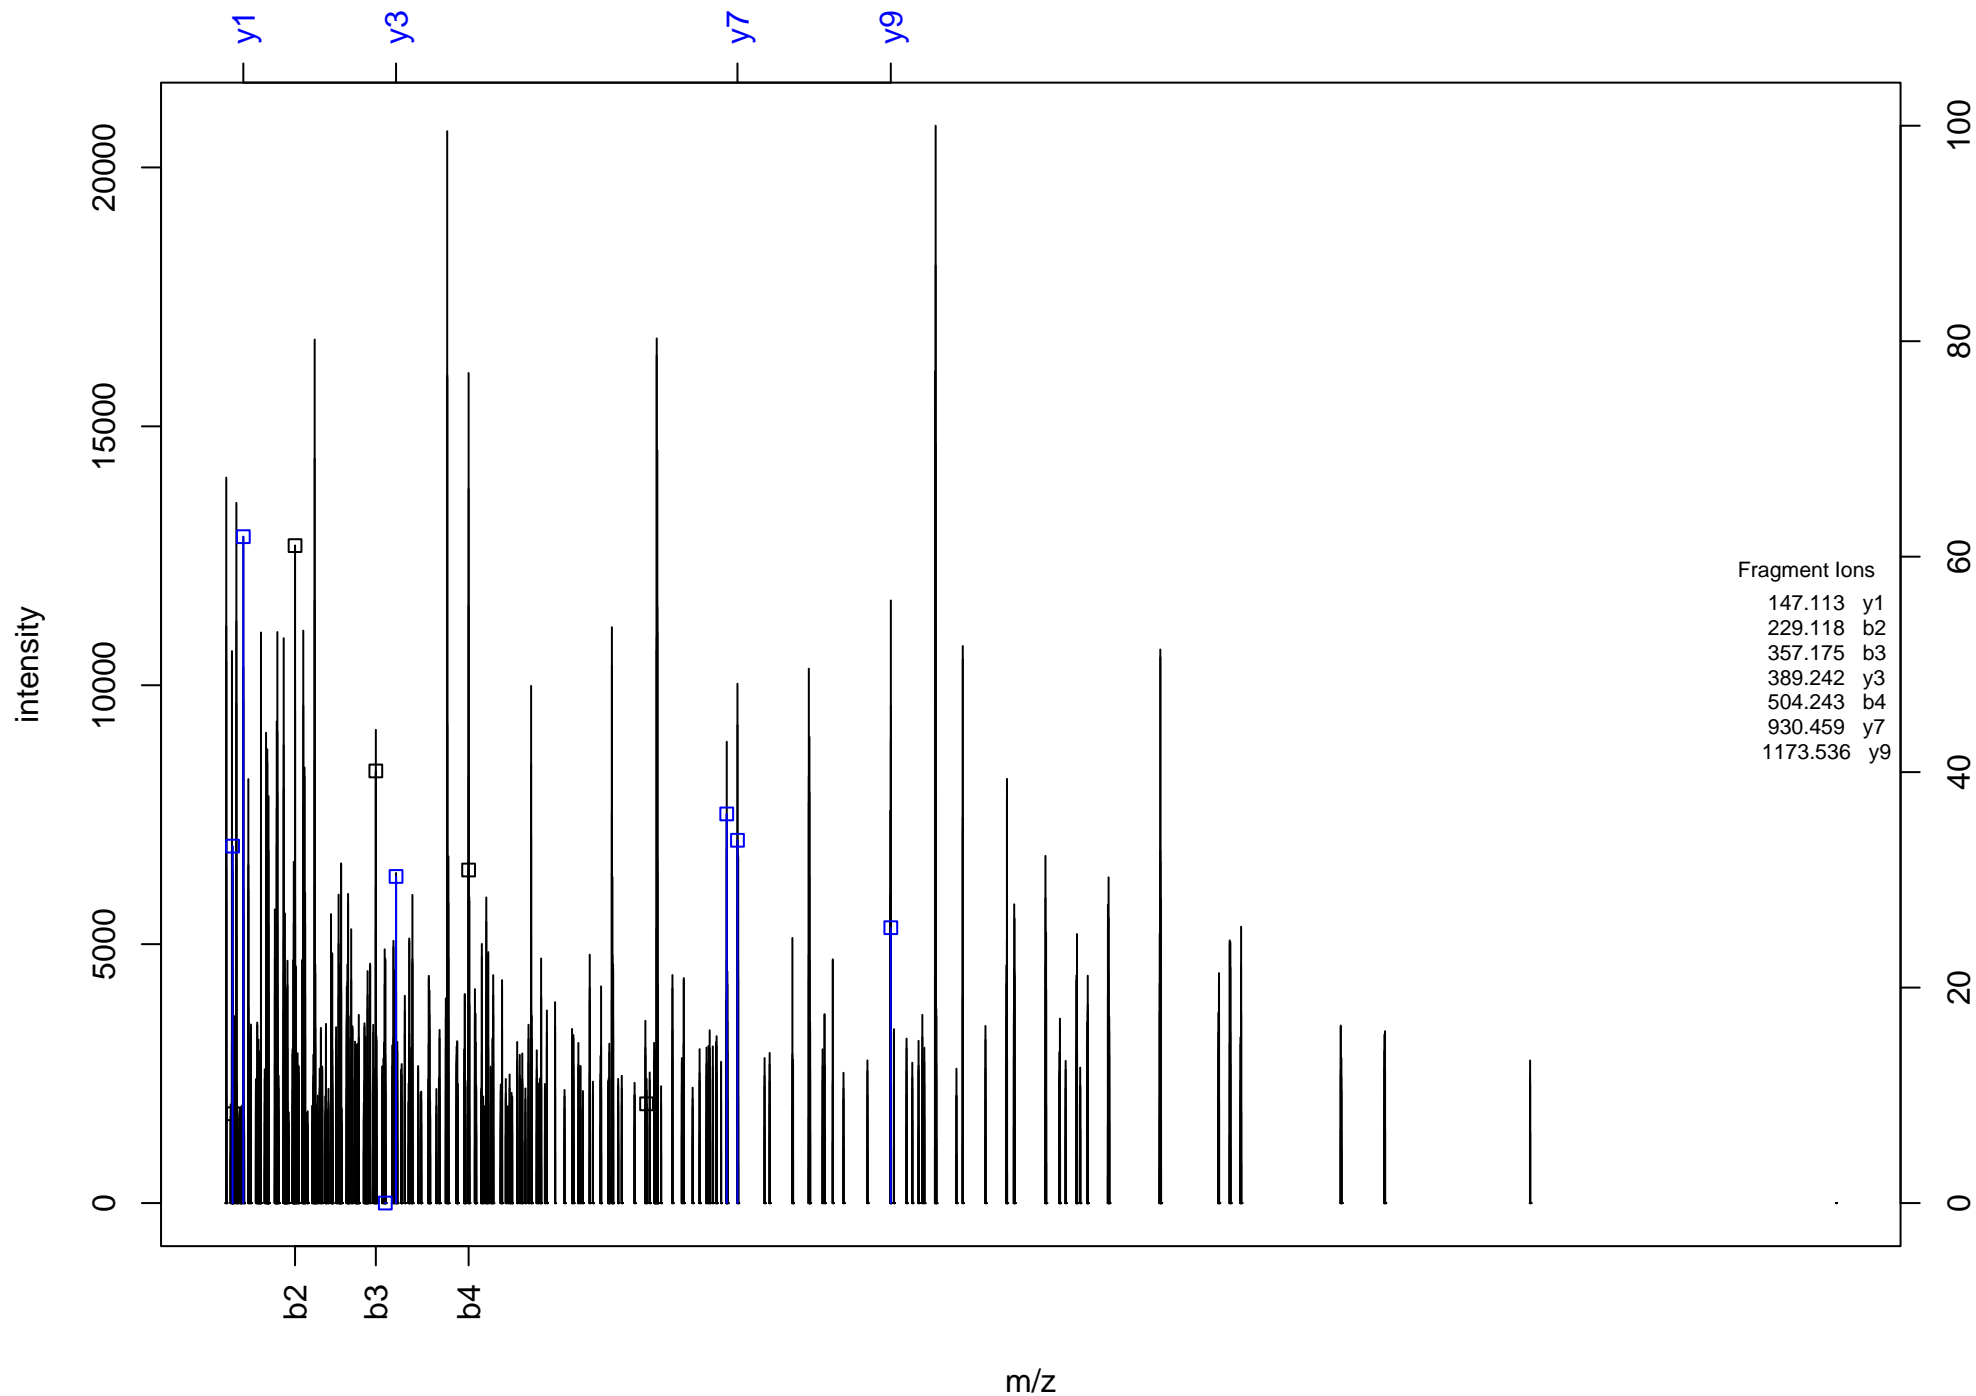

# AFSQ^YN^TLQ^THRR

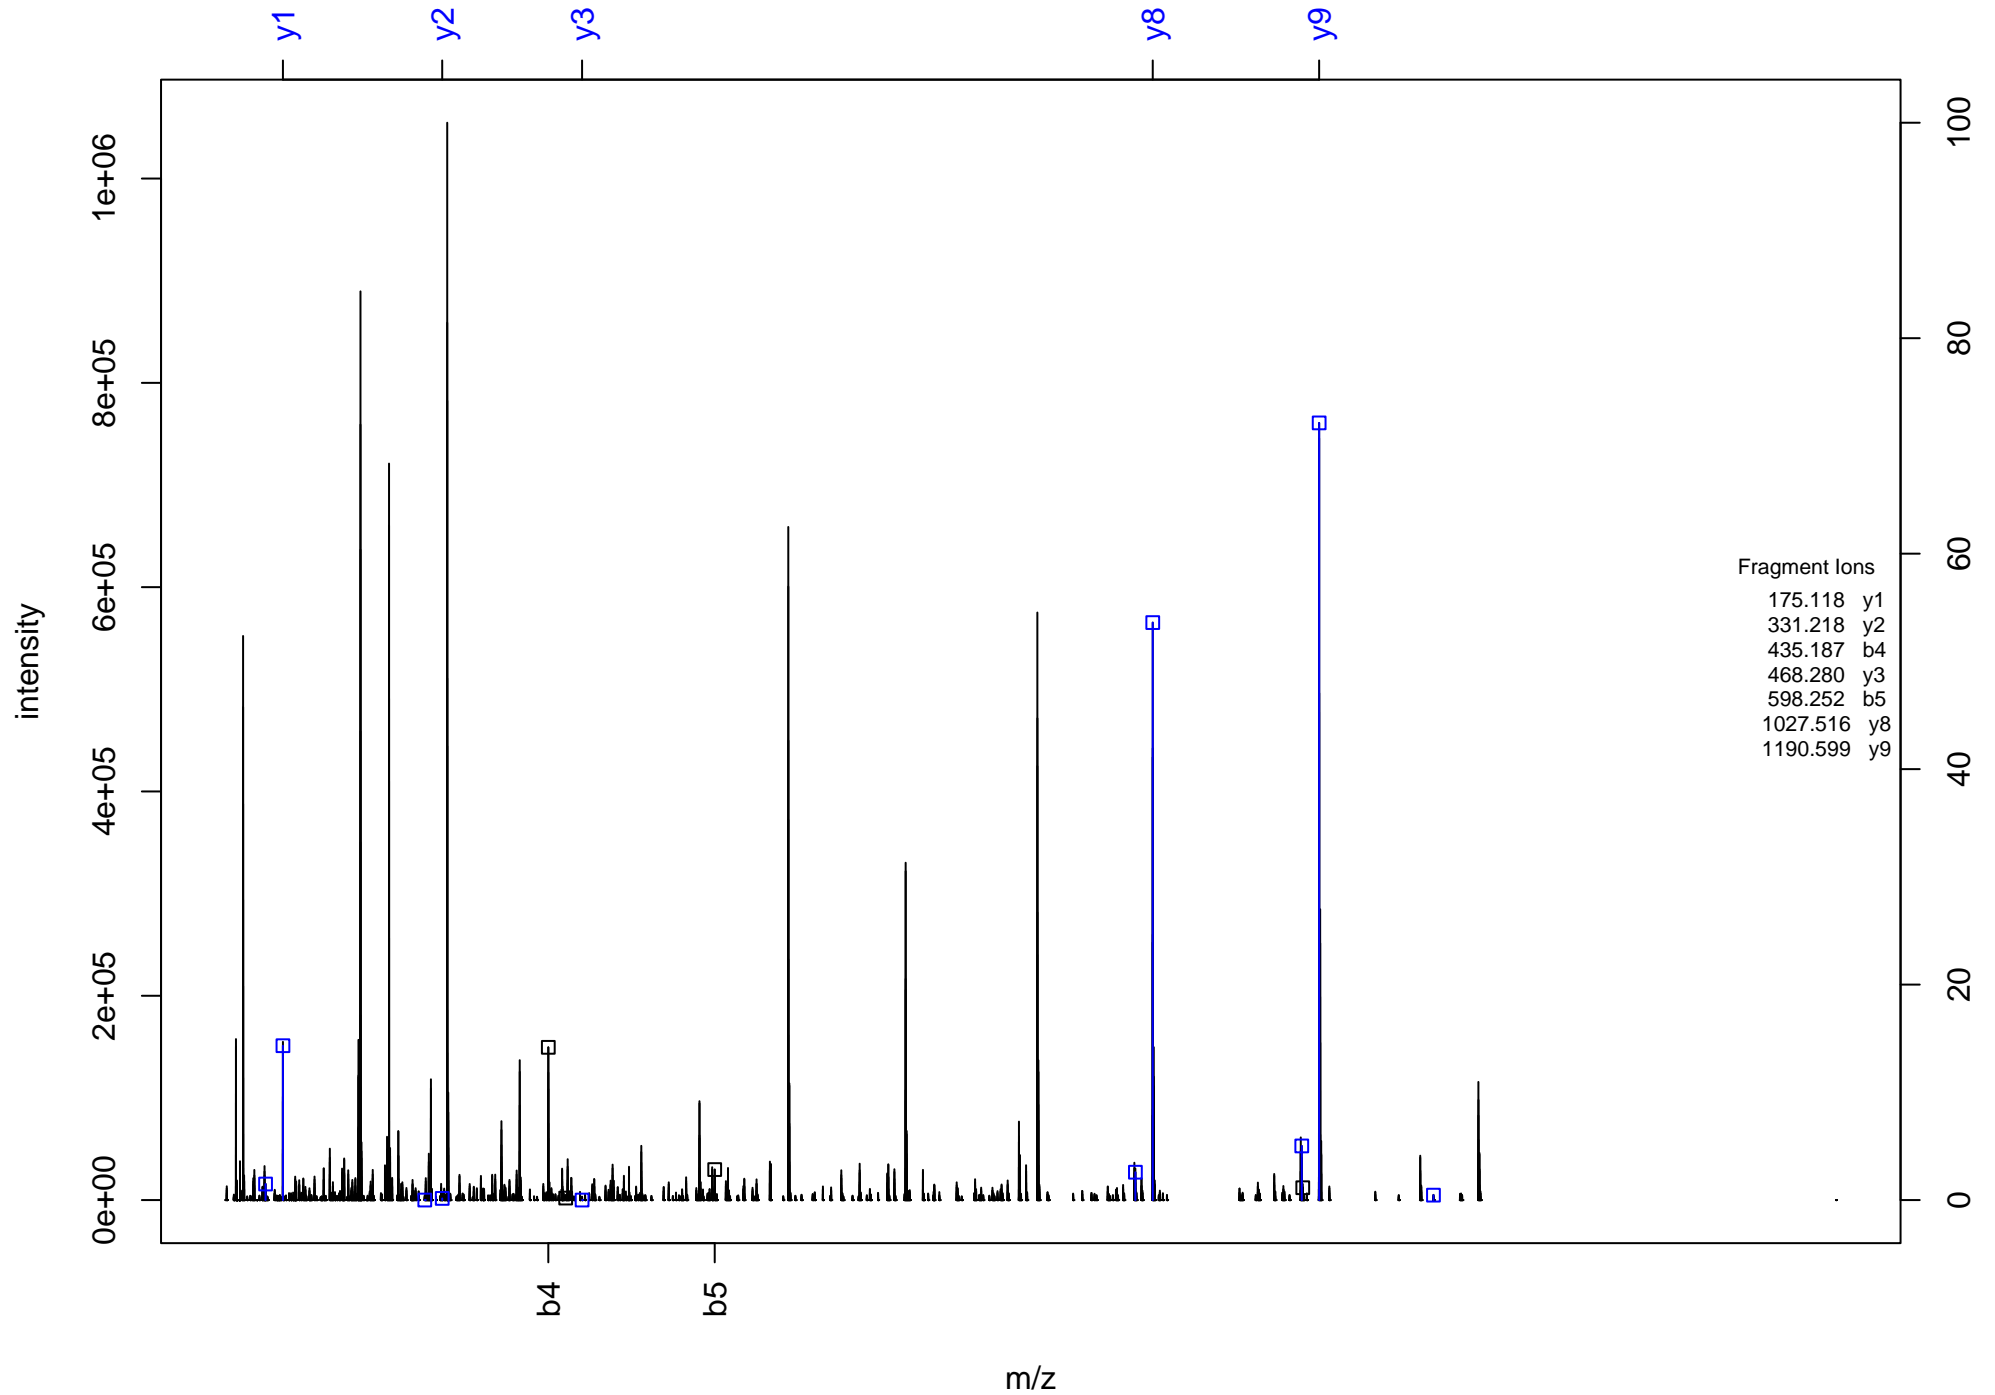



# DMLESPDFSTVLNTCLNR

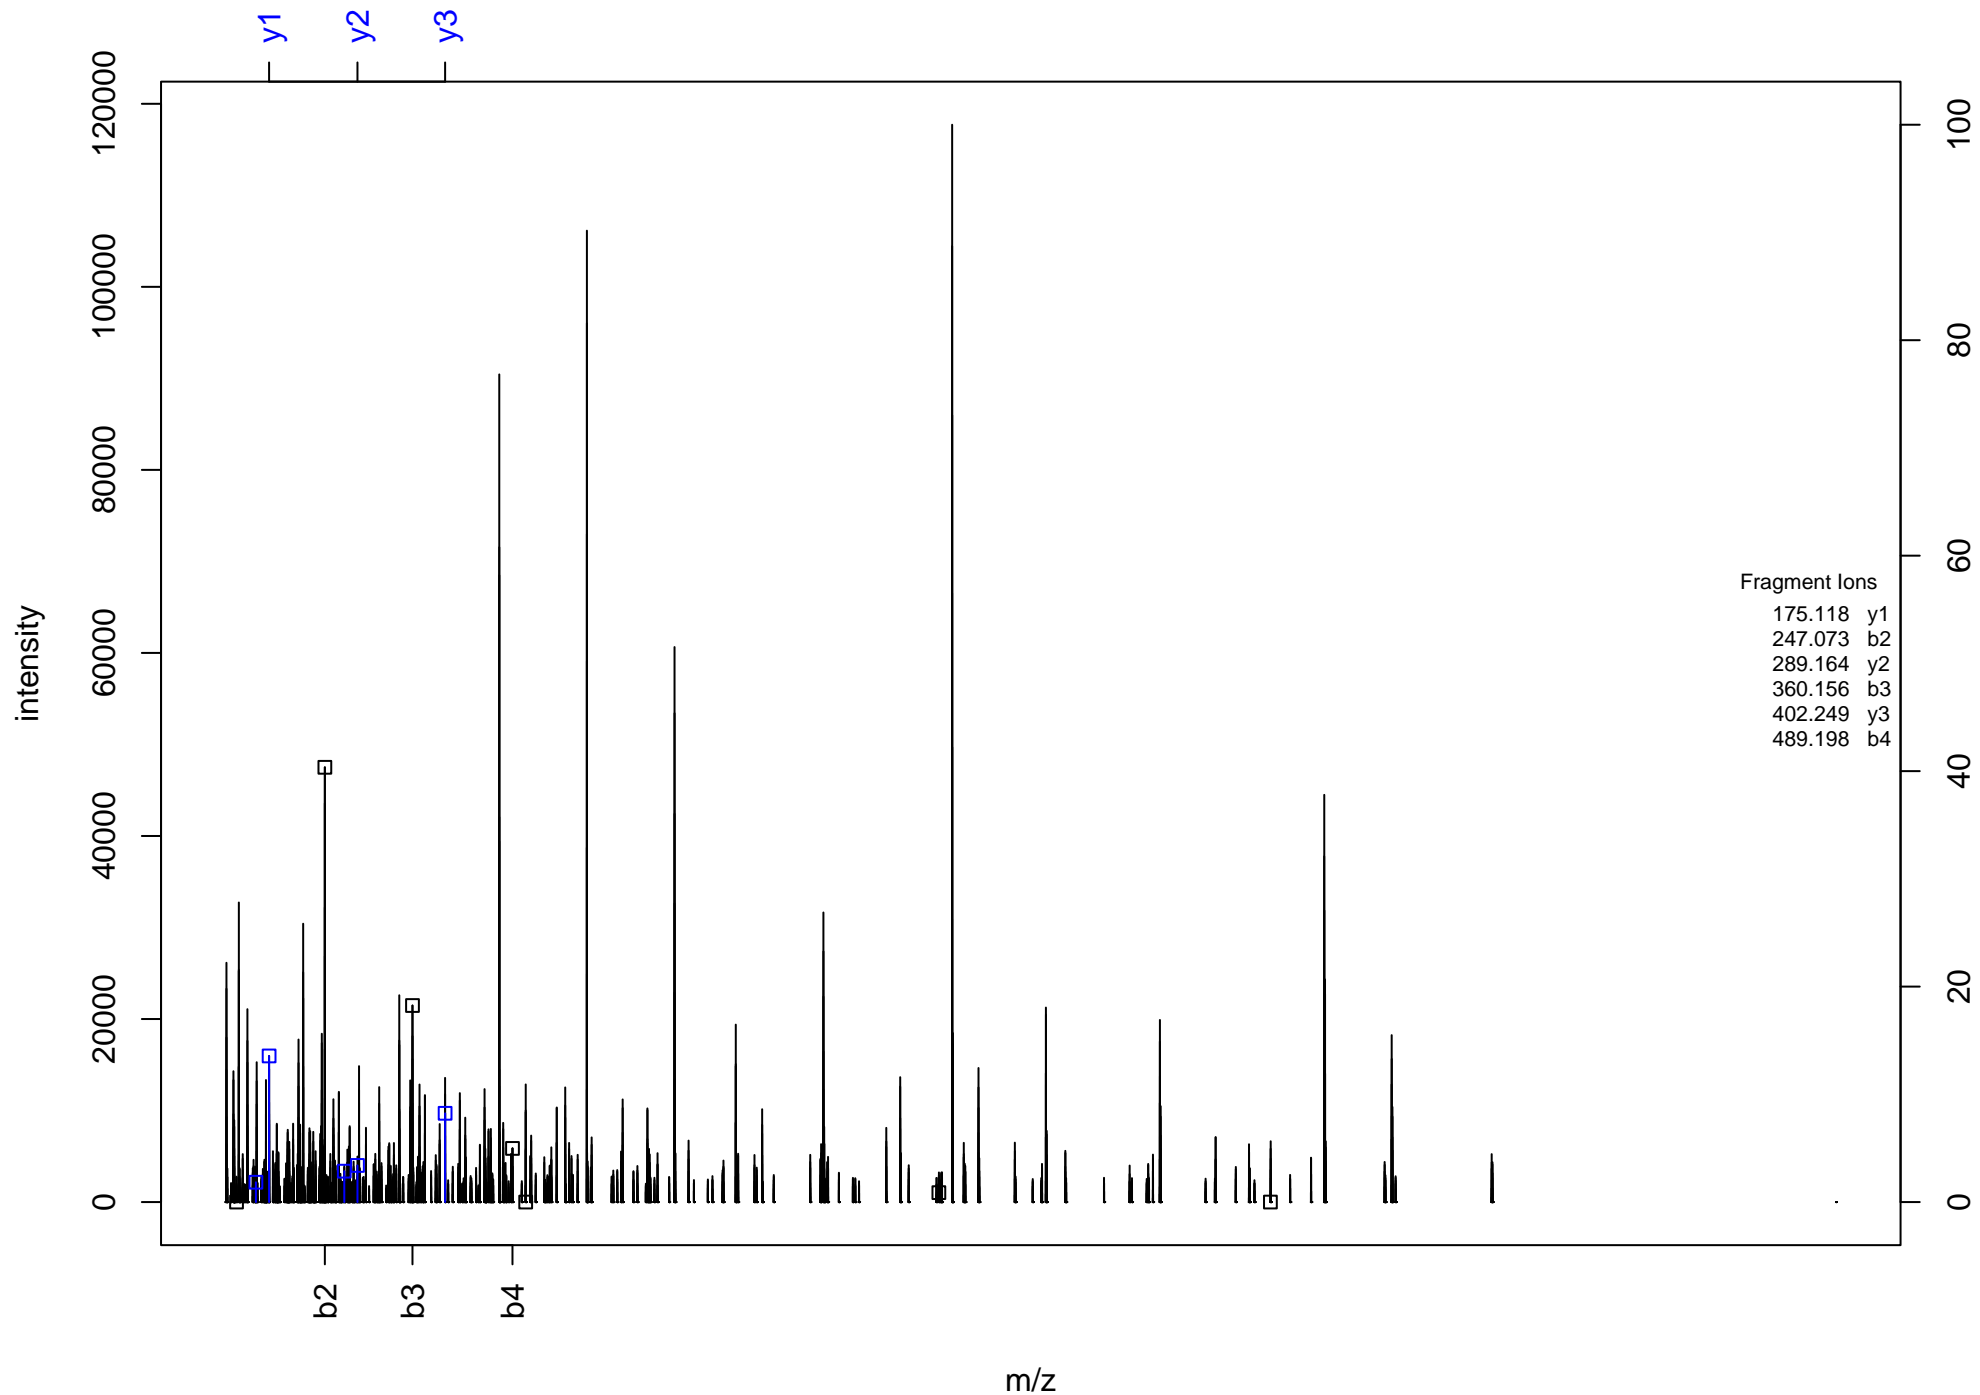

# VPFADALDLFR

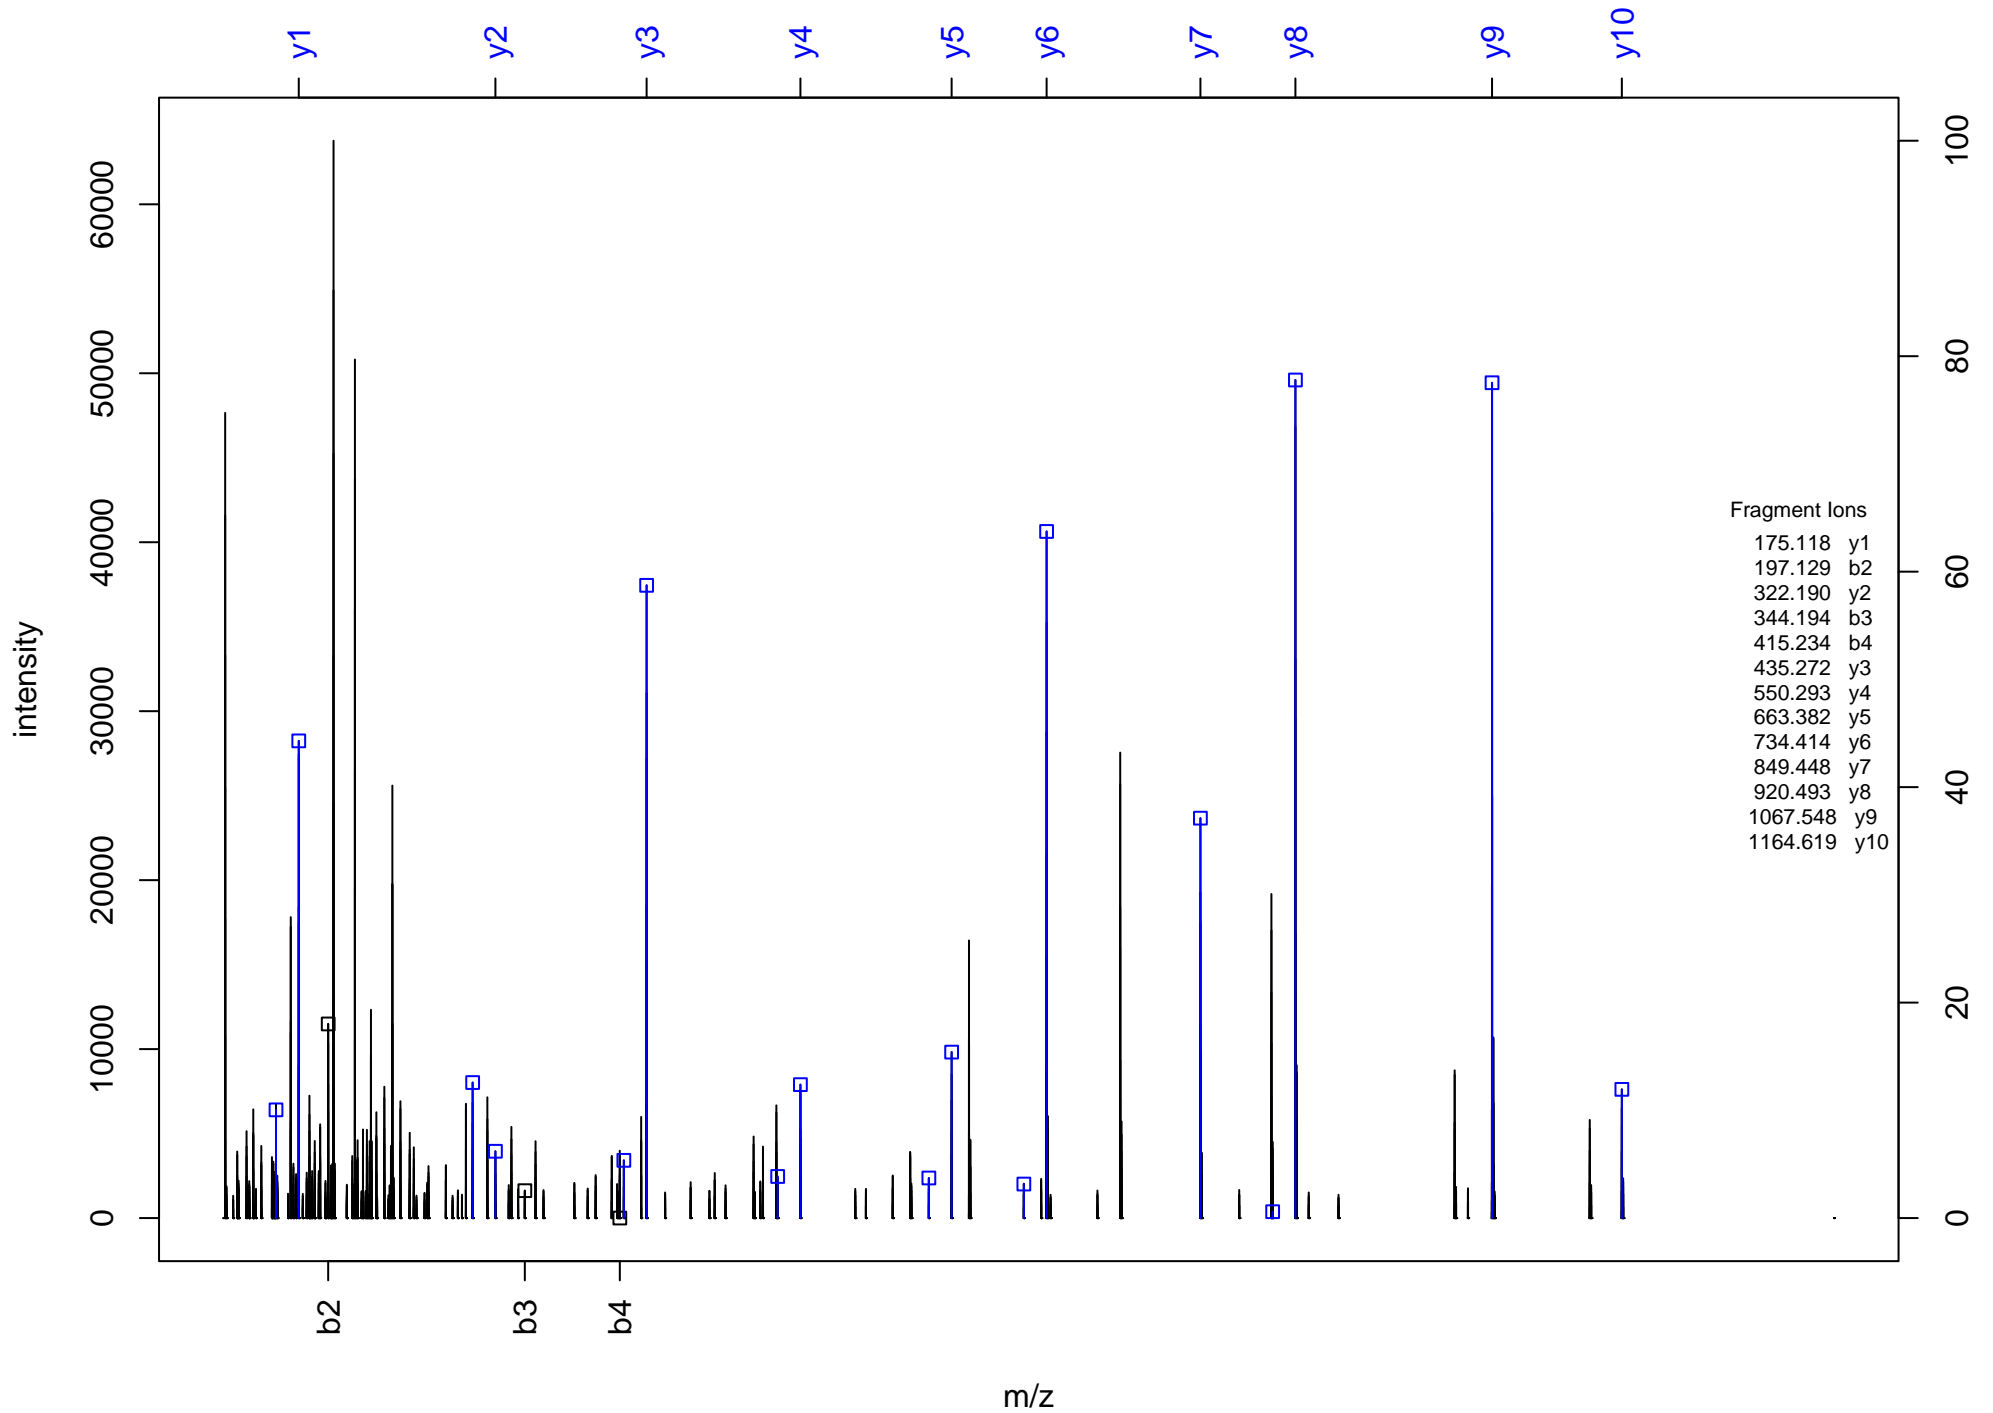

# DNAGQVTLVPEEPEDM\*WHTFNLVQVGDSLRL

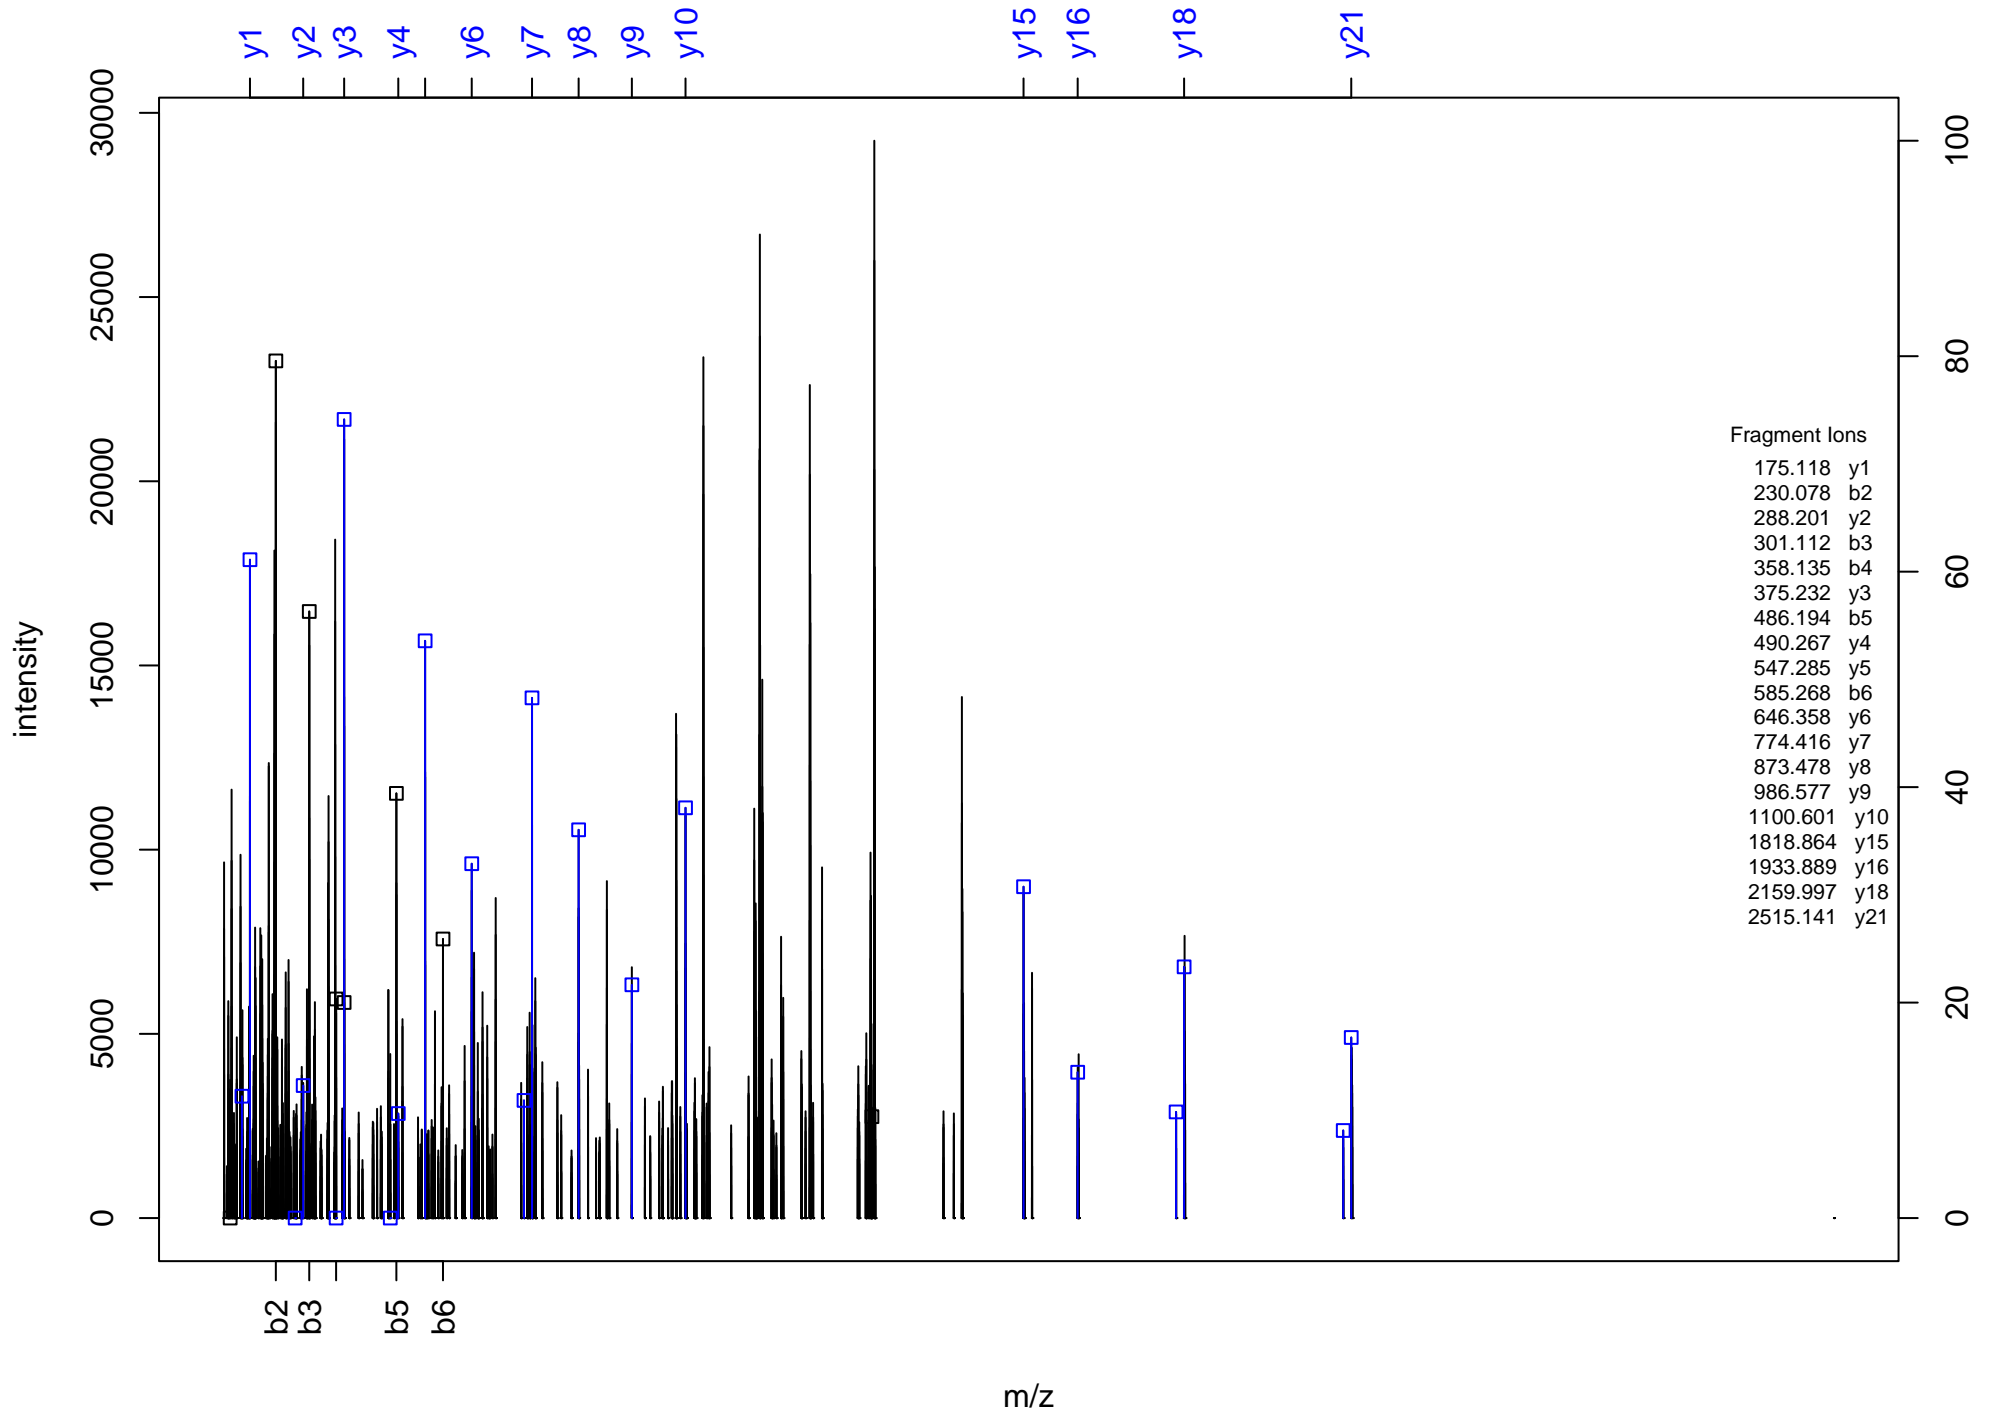

# ILDVGCGGGLLTEPLGR

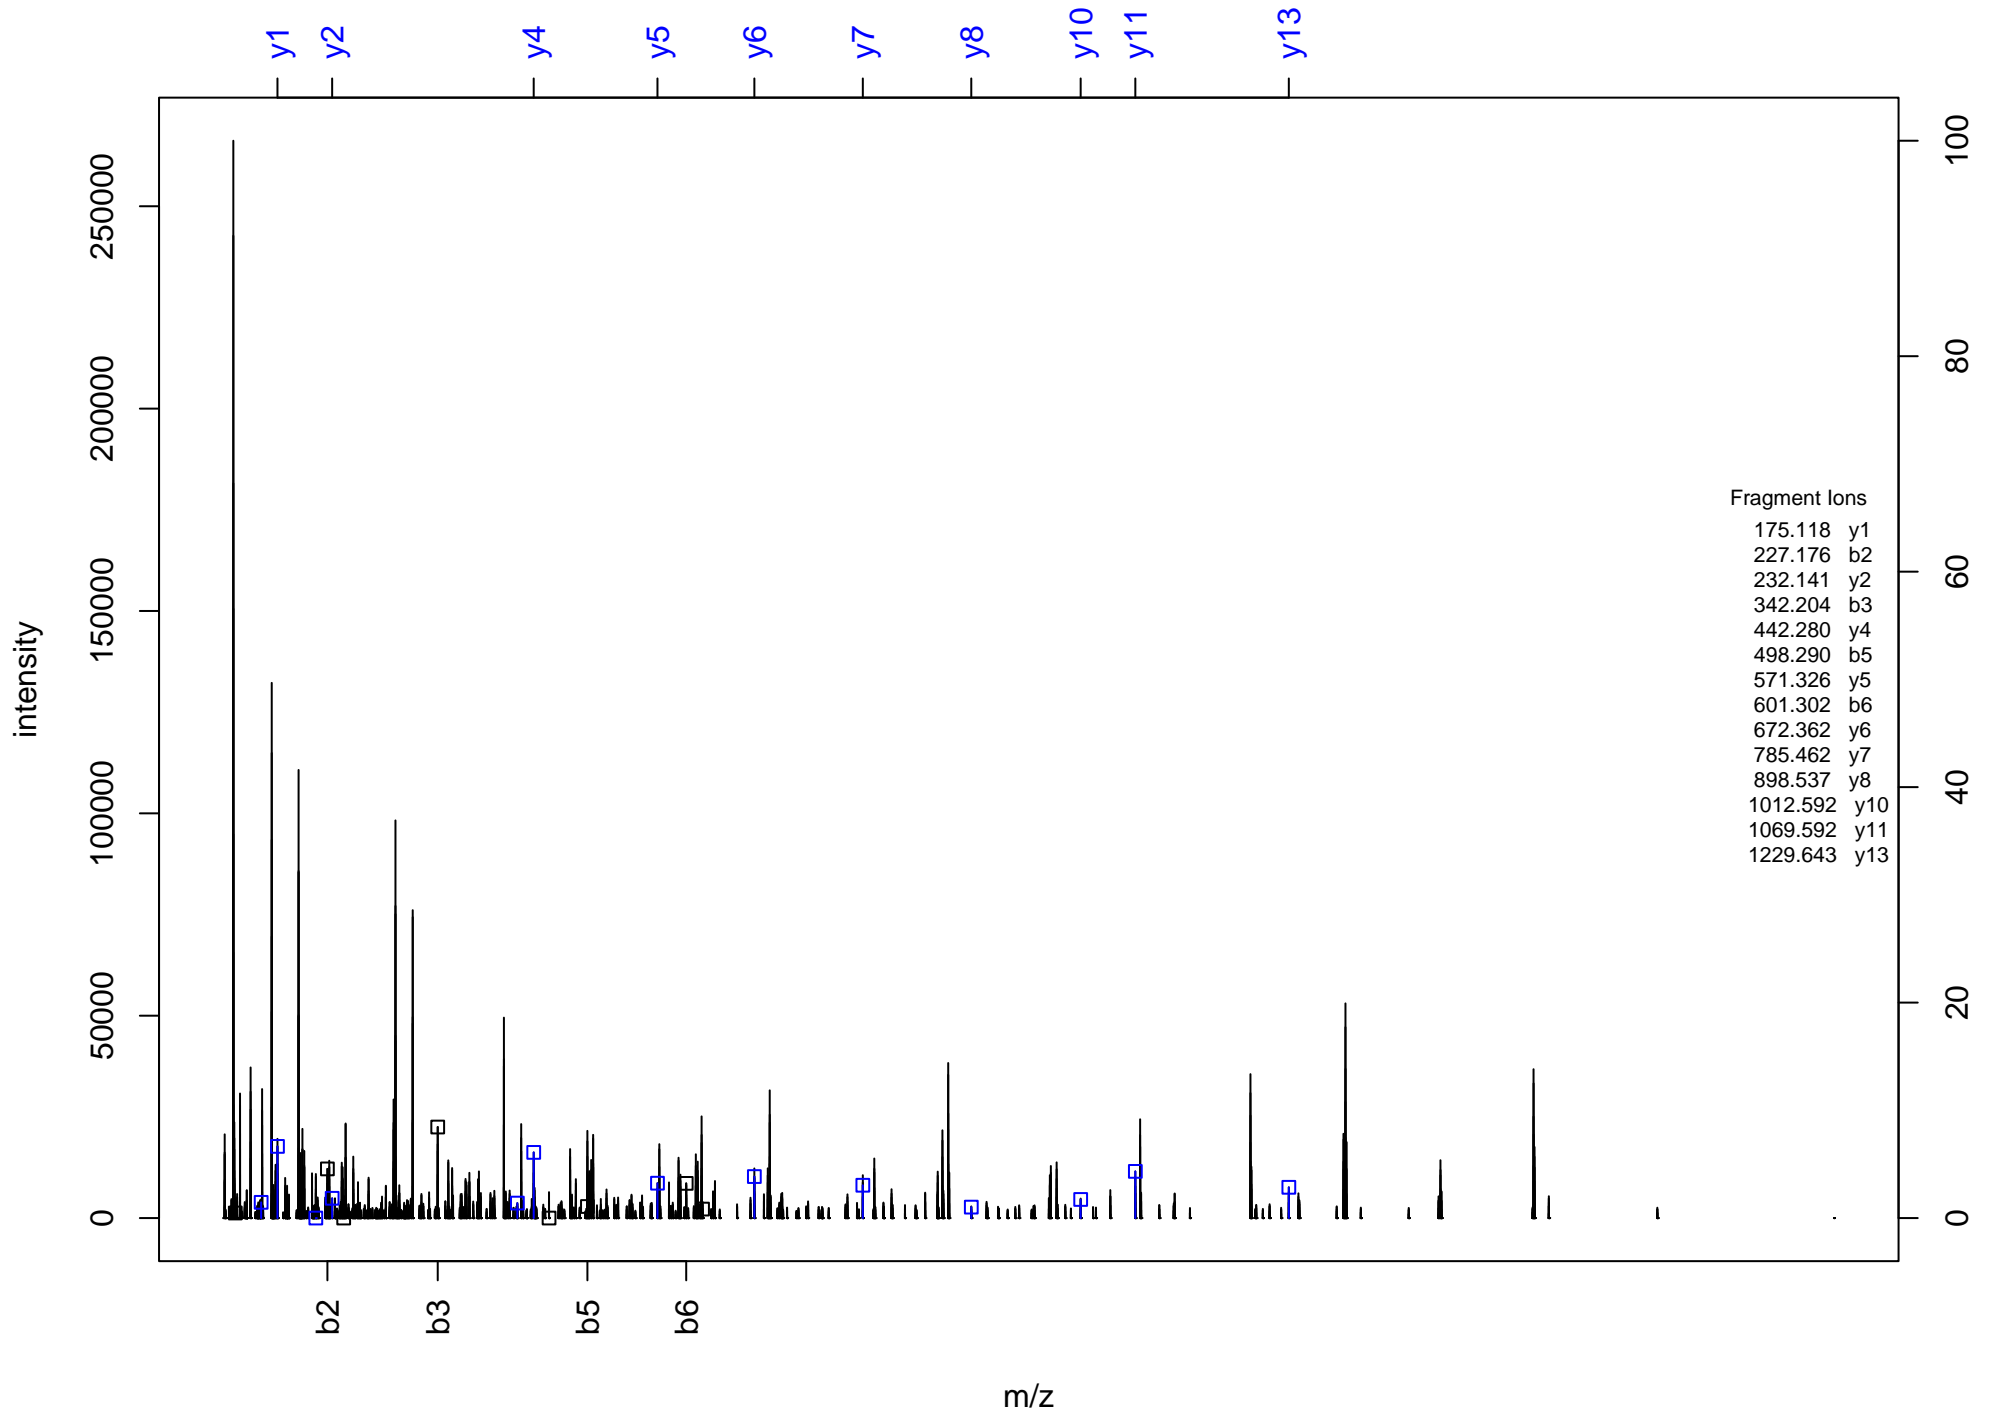

# LKFVVN<sup>N</sup><sup>N</sup><sup>V</sup>AFSPGMKN<sup>R</sup>

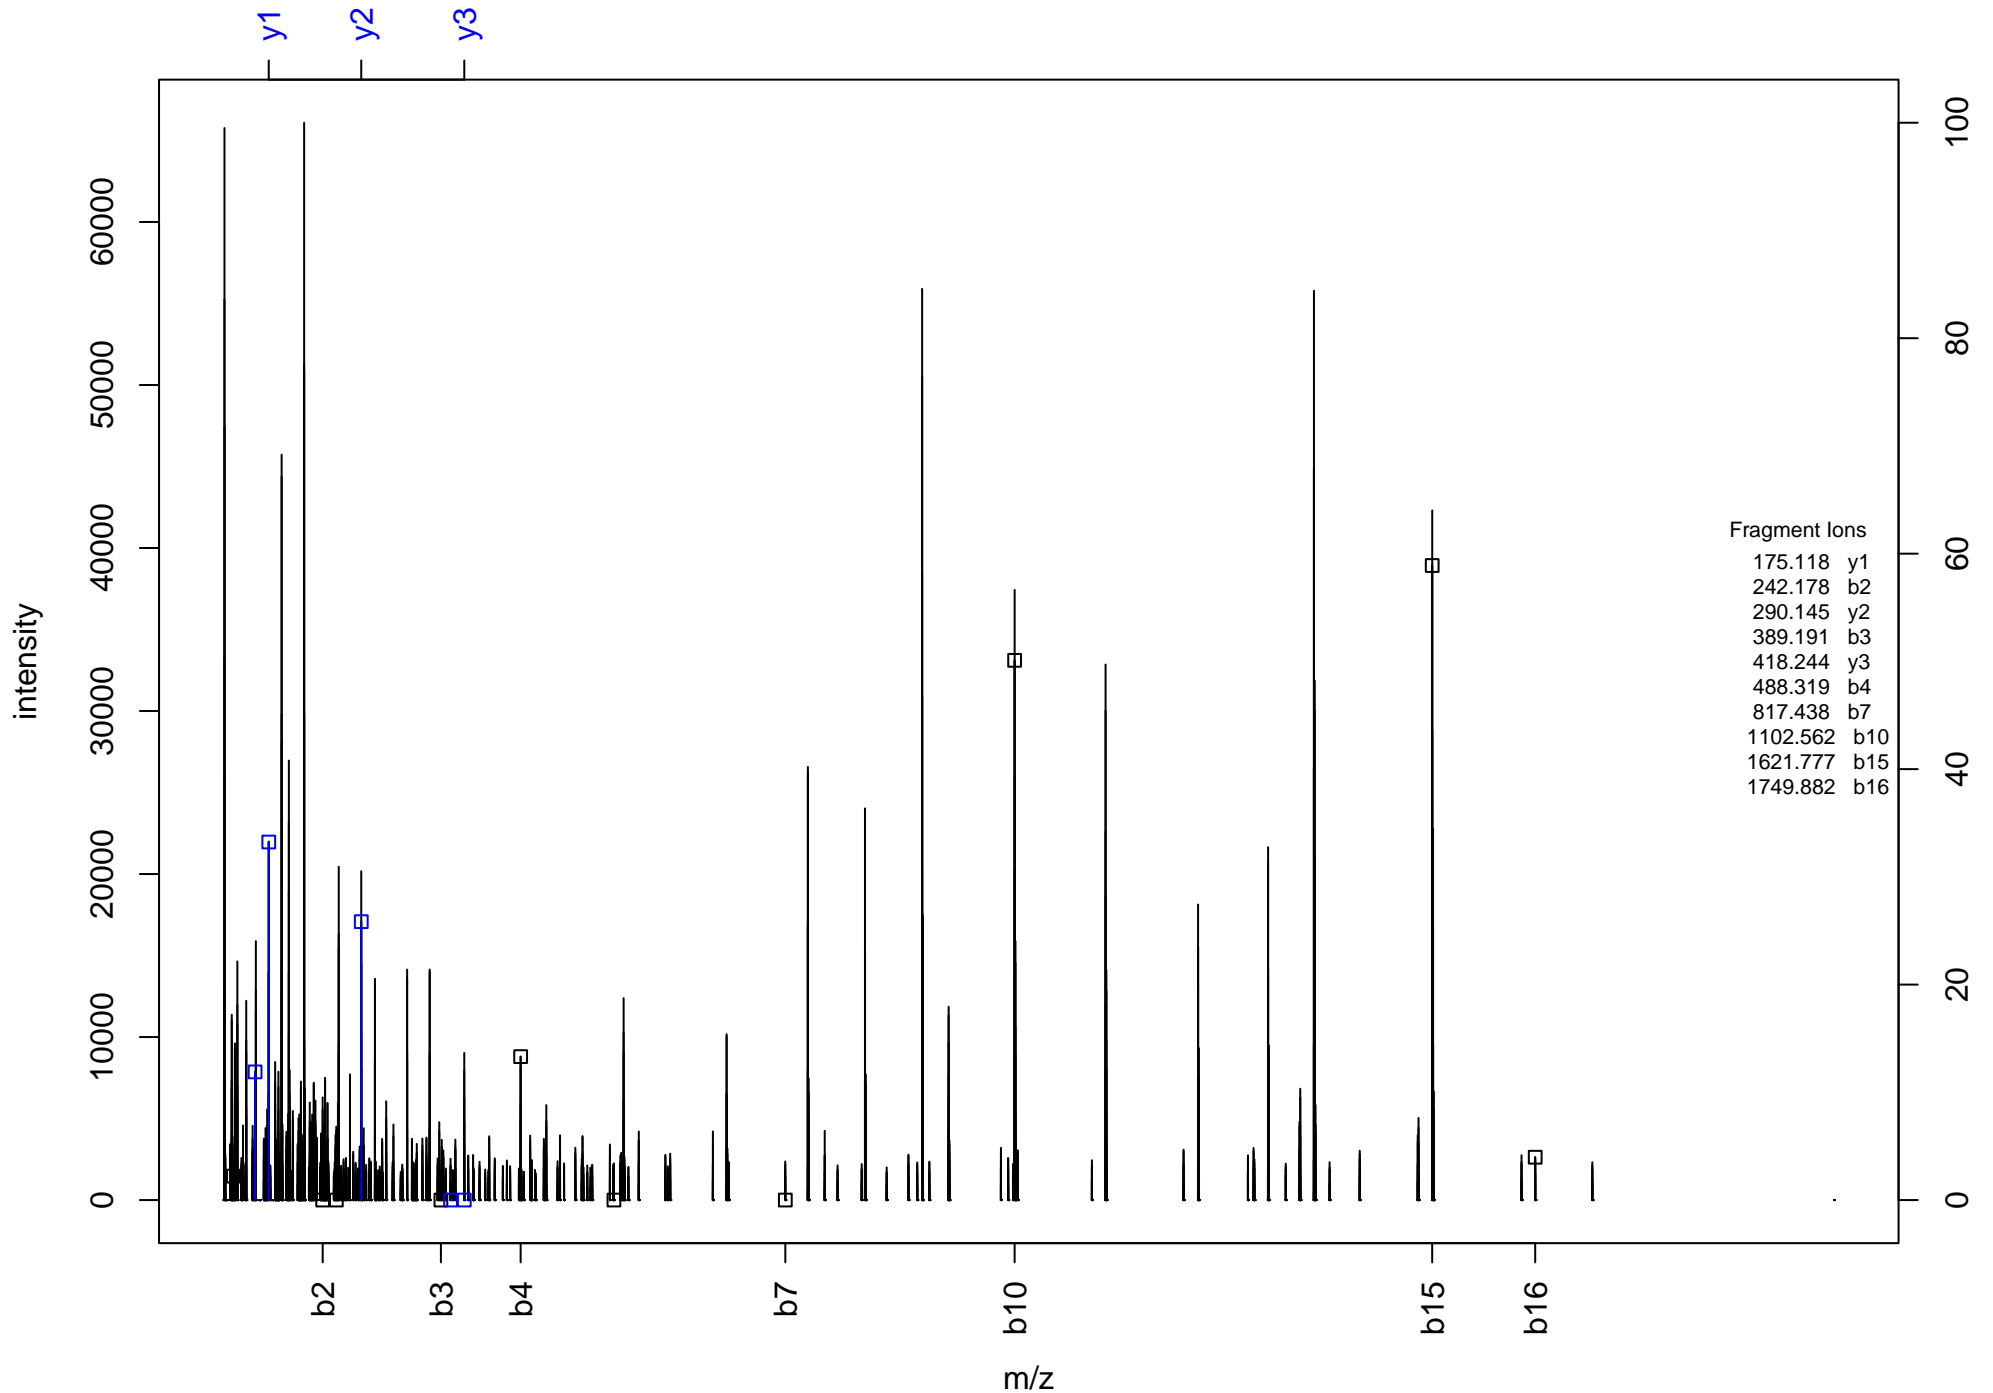

# TDVFAPDYIAGVSPFAENDISSR

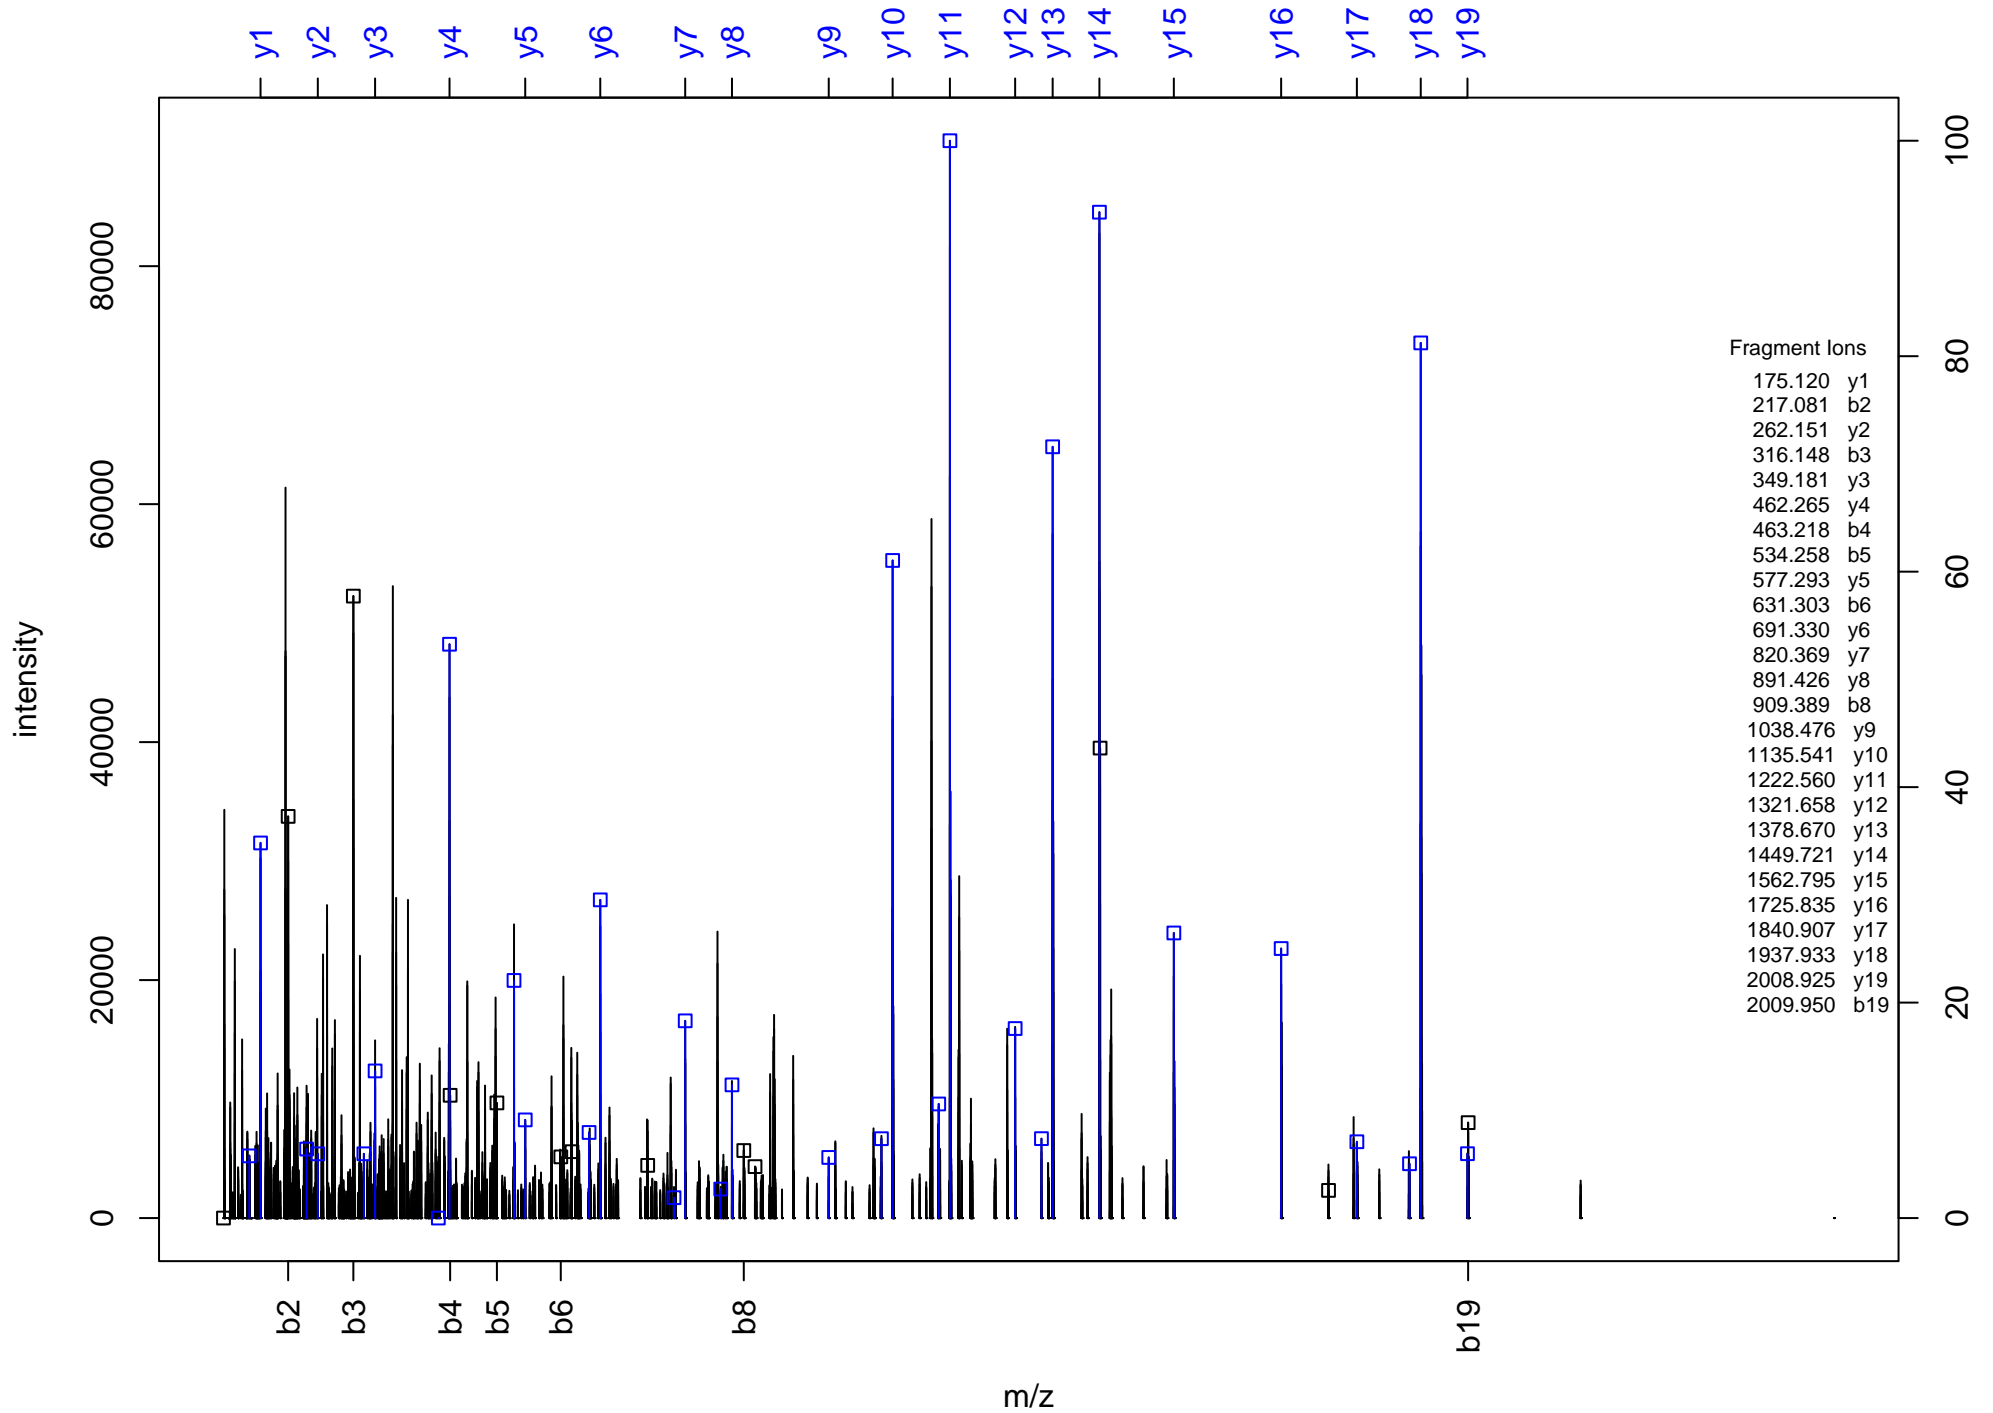

# AFLLESLLK

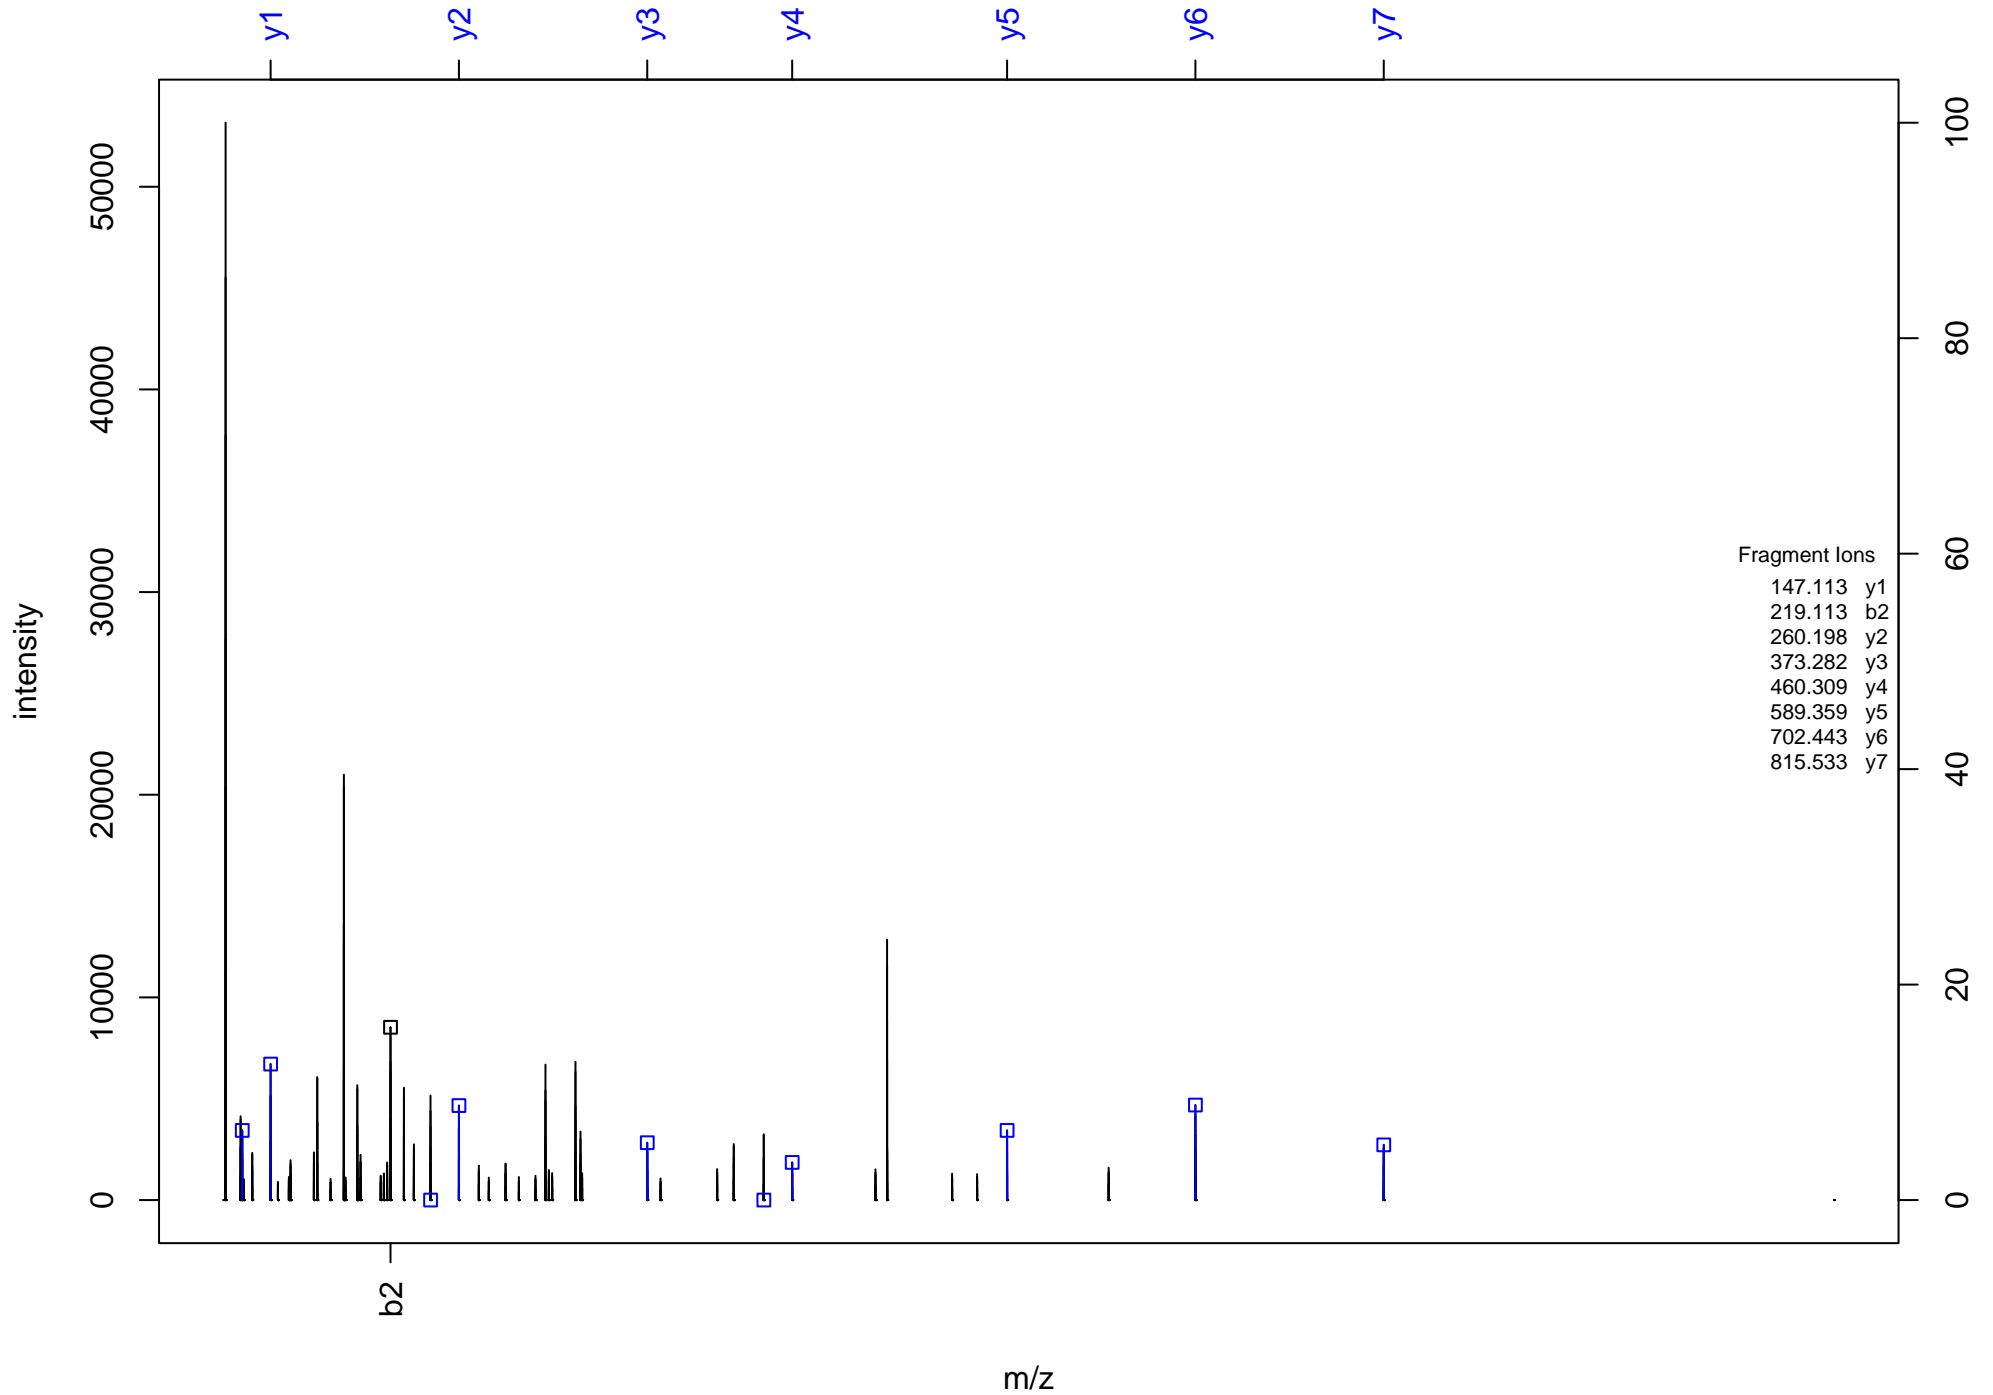

# SYLYFTQFK

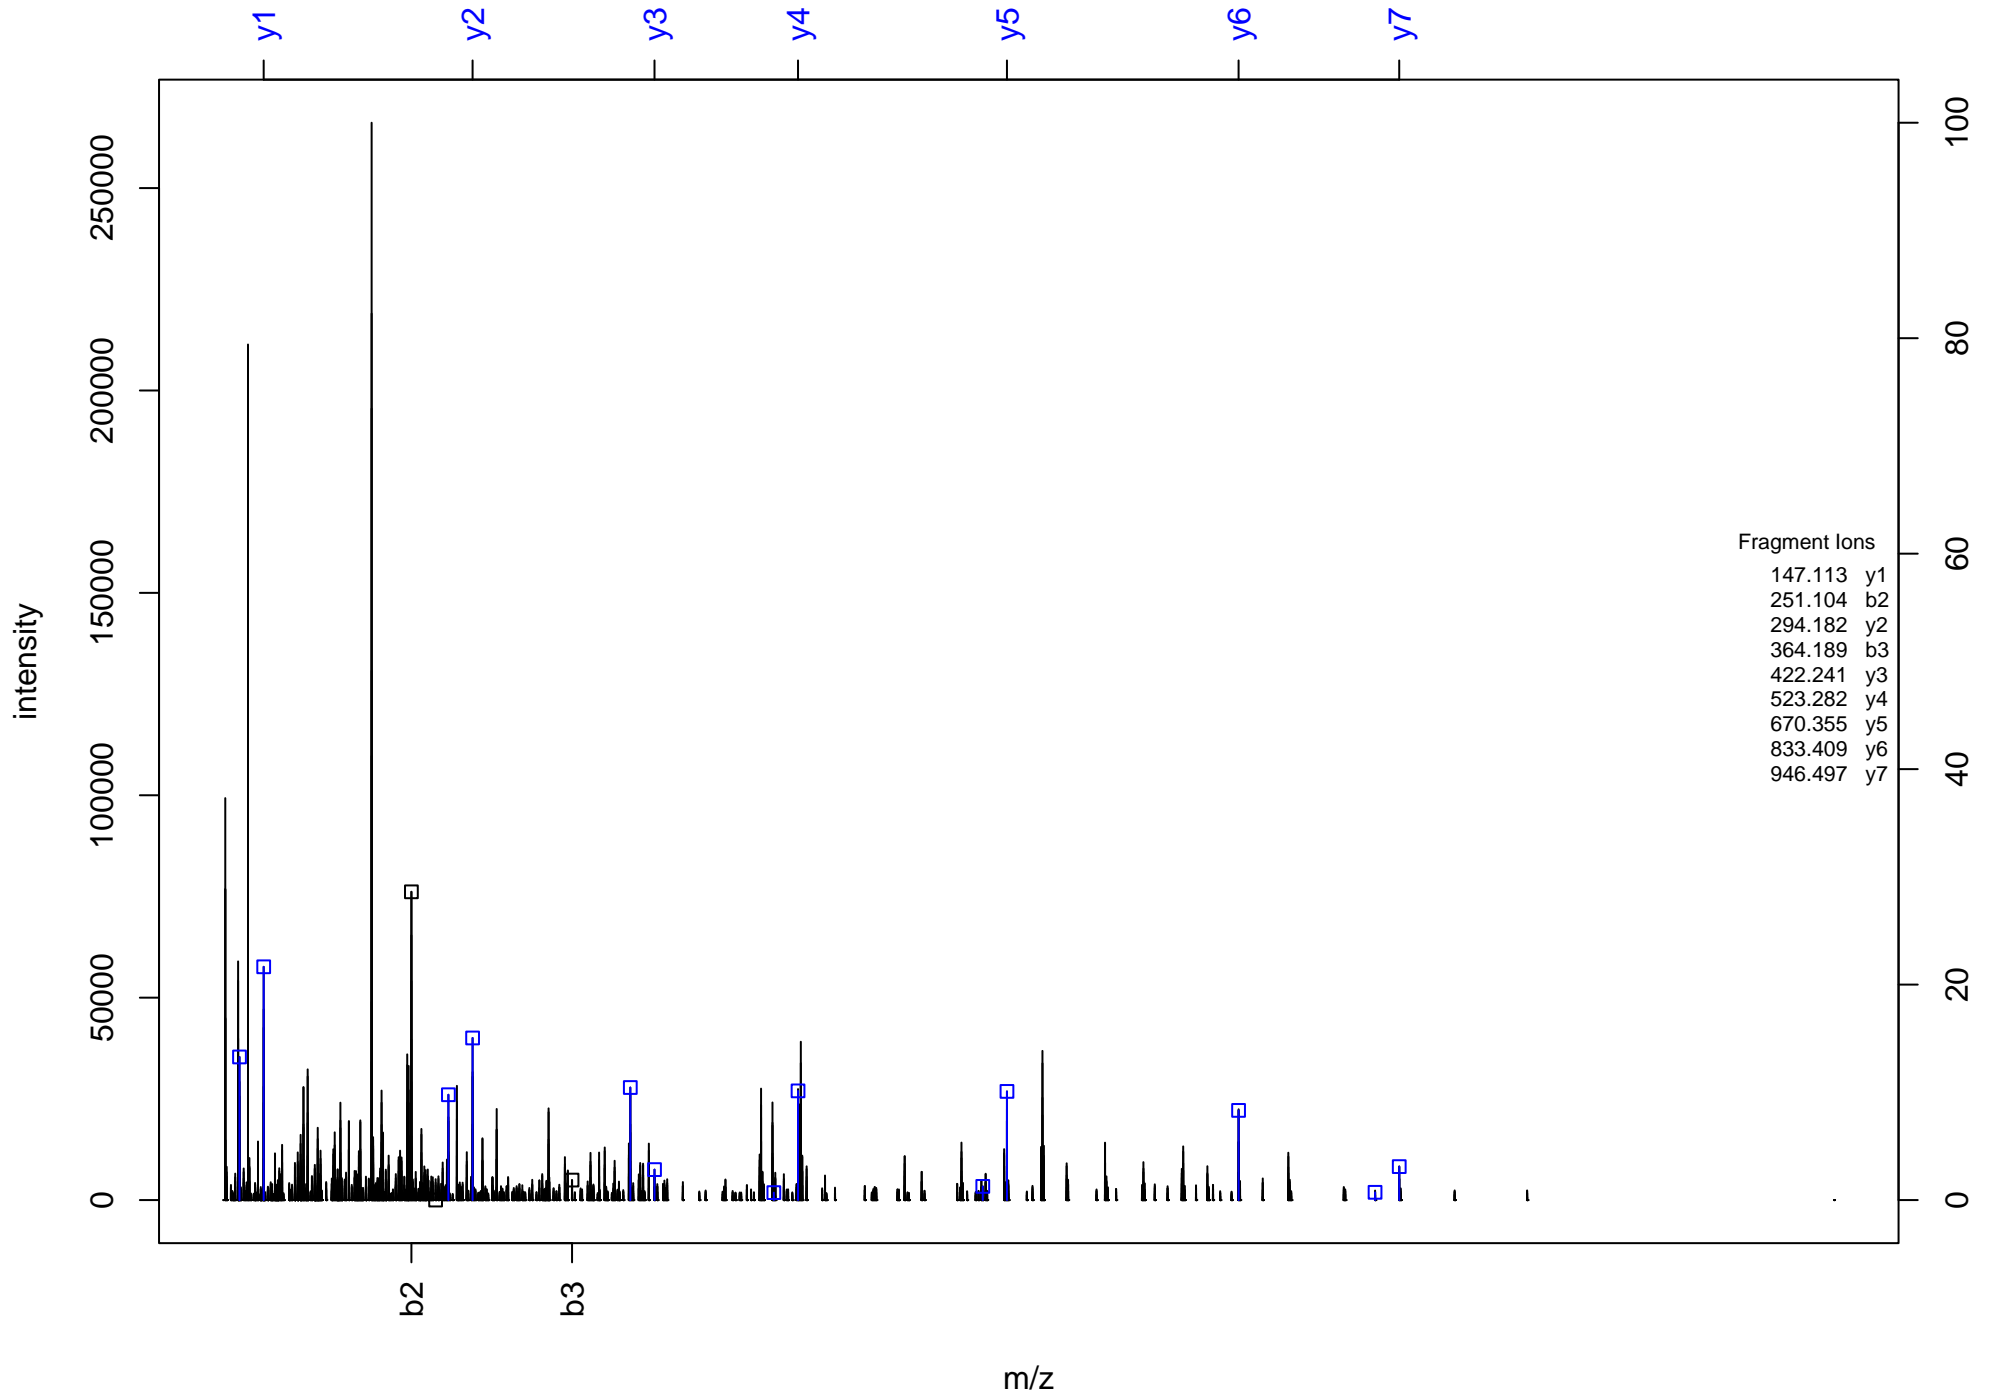

Fragment Ions  
147.113 y1  
251.104 b2  
294.182 y2  
364.189 b3  
422.241 y3  
523.282 y4  
670.355 y5  
833.409 y6  
946.497 y7



# NIADLMTQAGVEELDPE NK

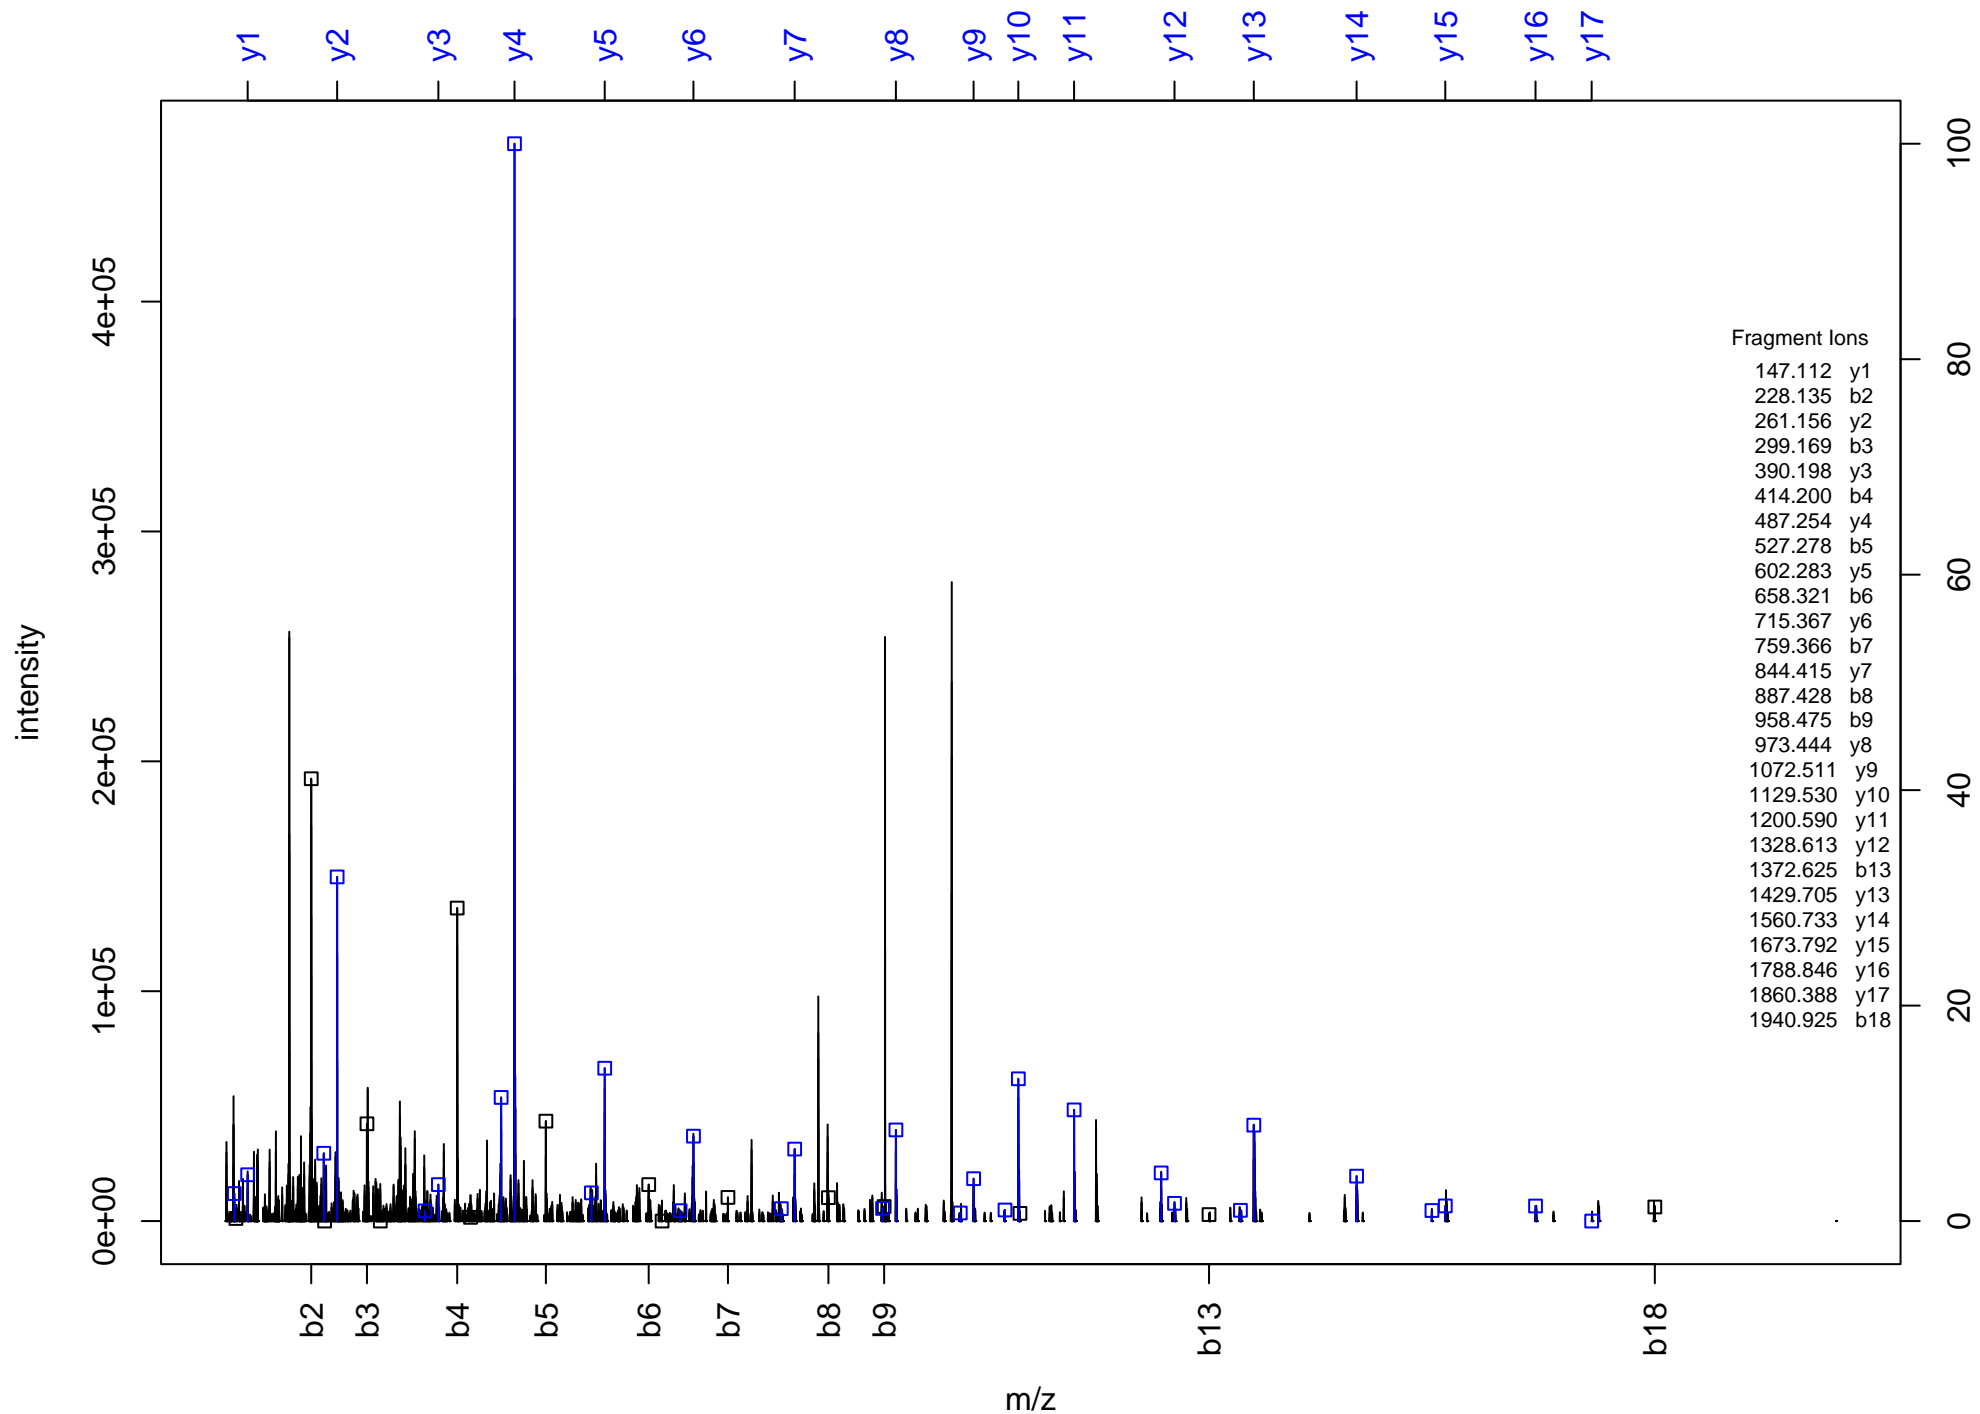

# KIN^EDIDL M\*IS

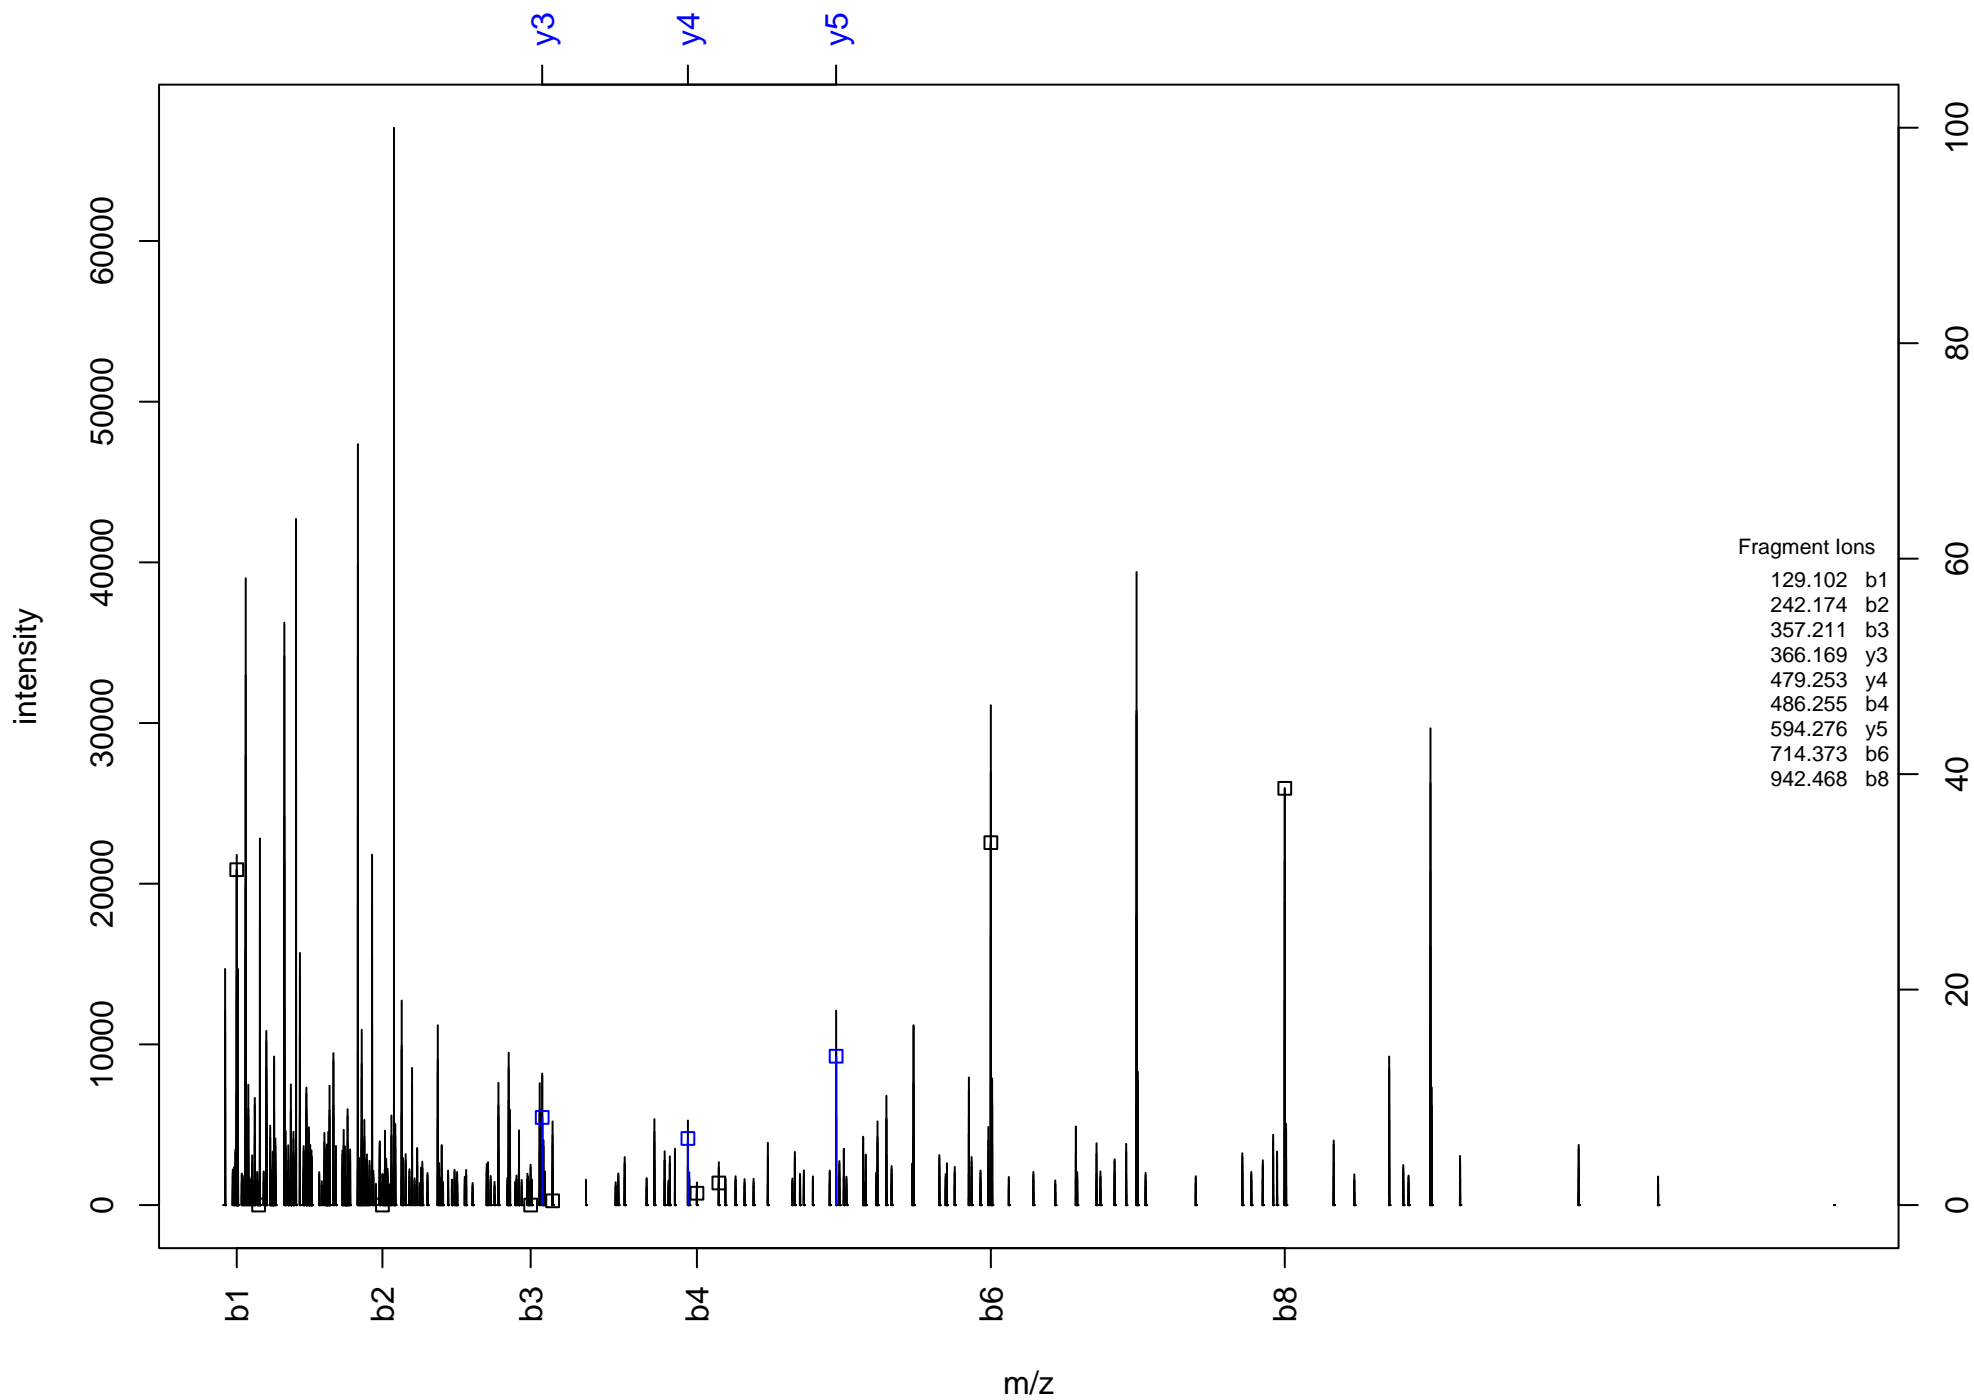

# (Ac)ADKPDMGEIASFDK

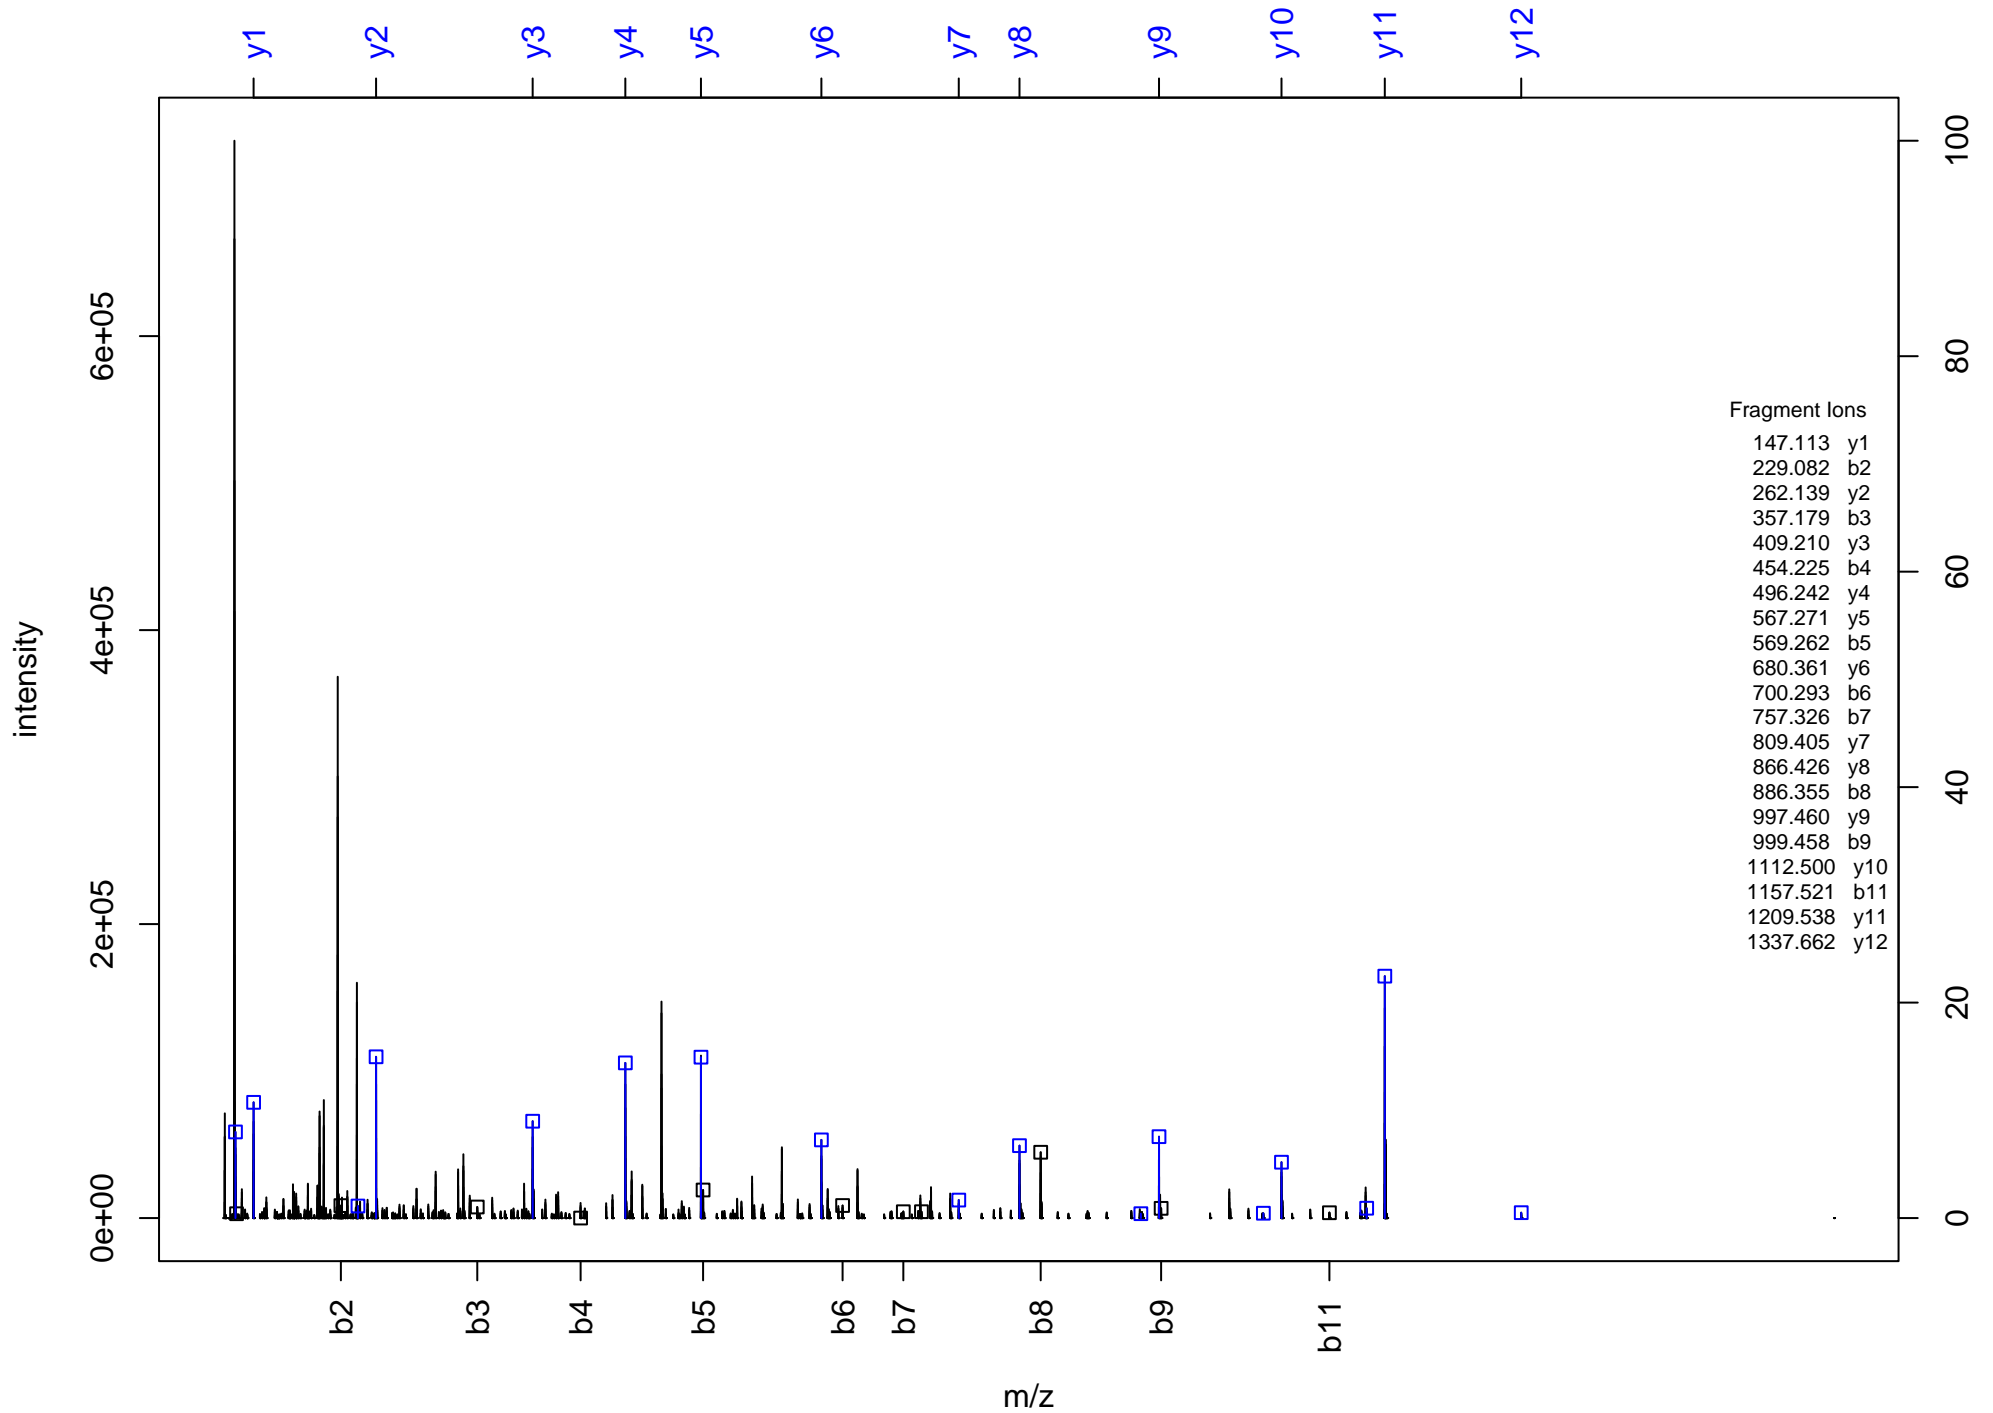

# IKEN^M\*Q^VFEFQ^LTSVDM\*K

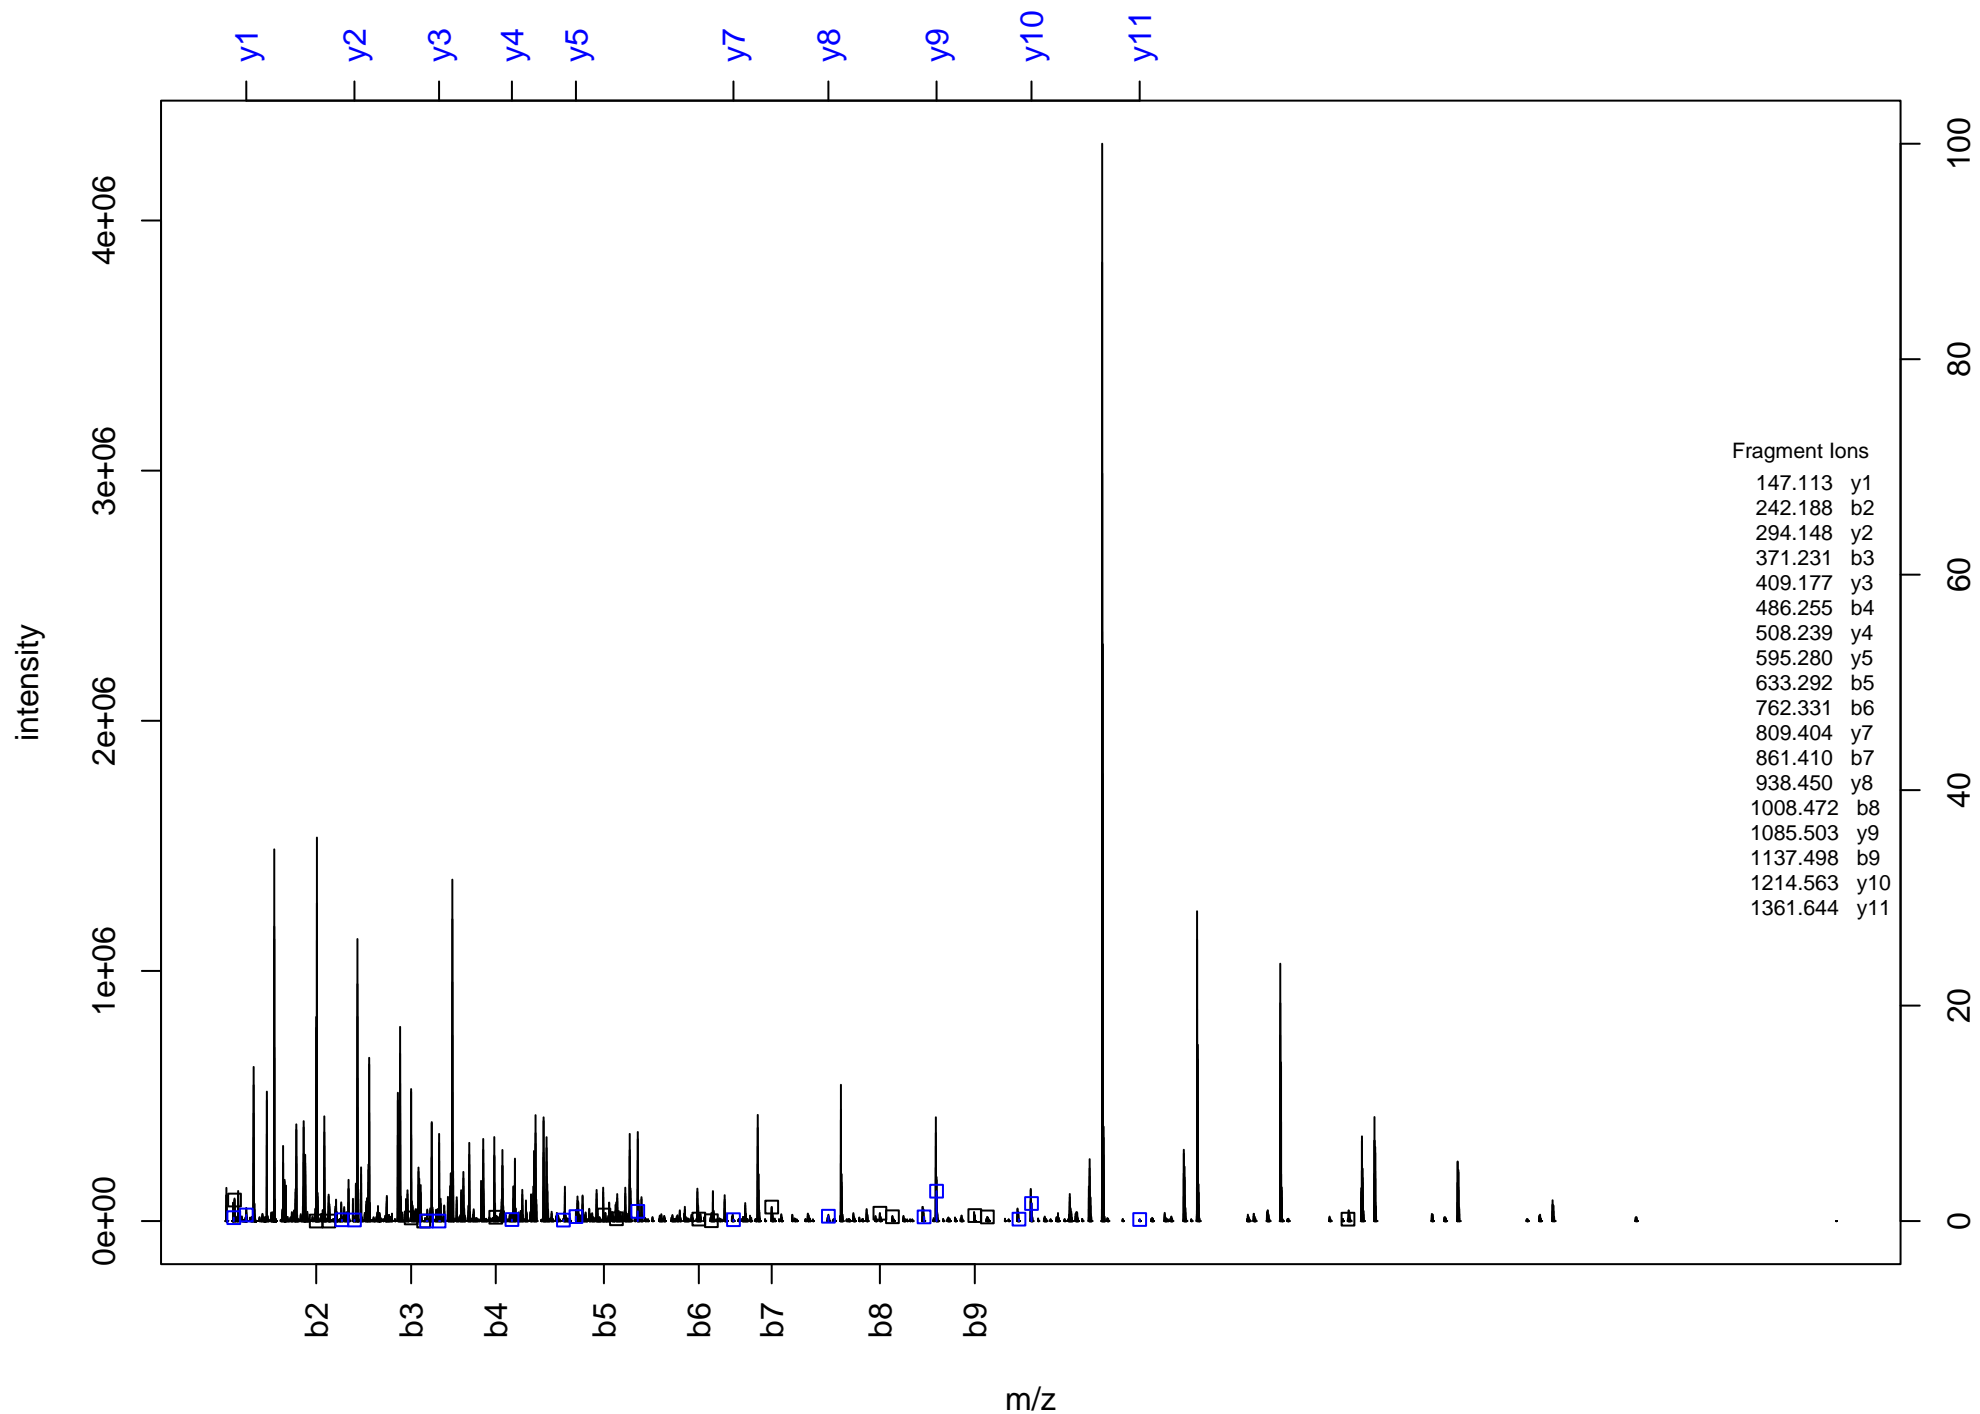

# LVLQ<sup>+</sup>LSQ<sup>+</sup>N<sup>+</sup>IR

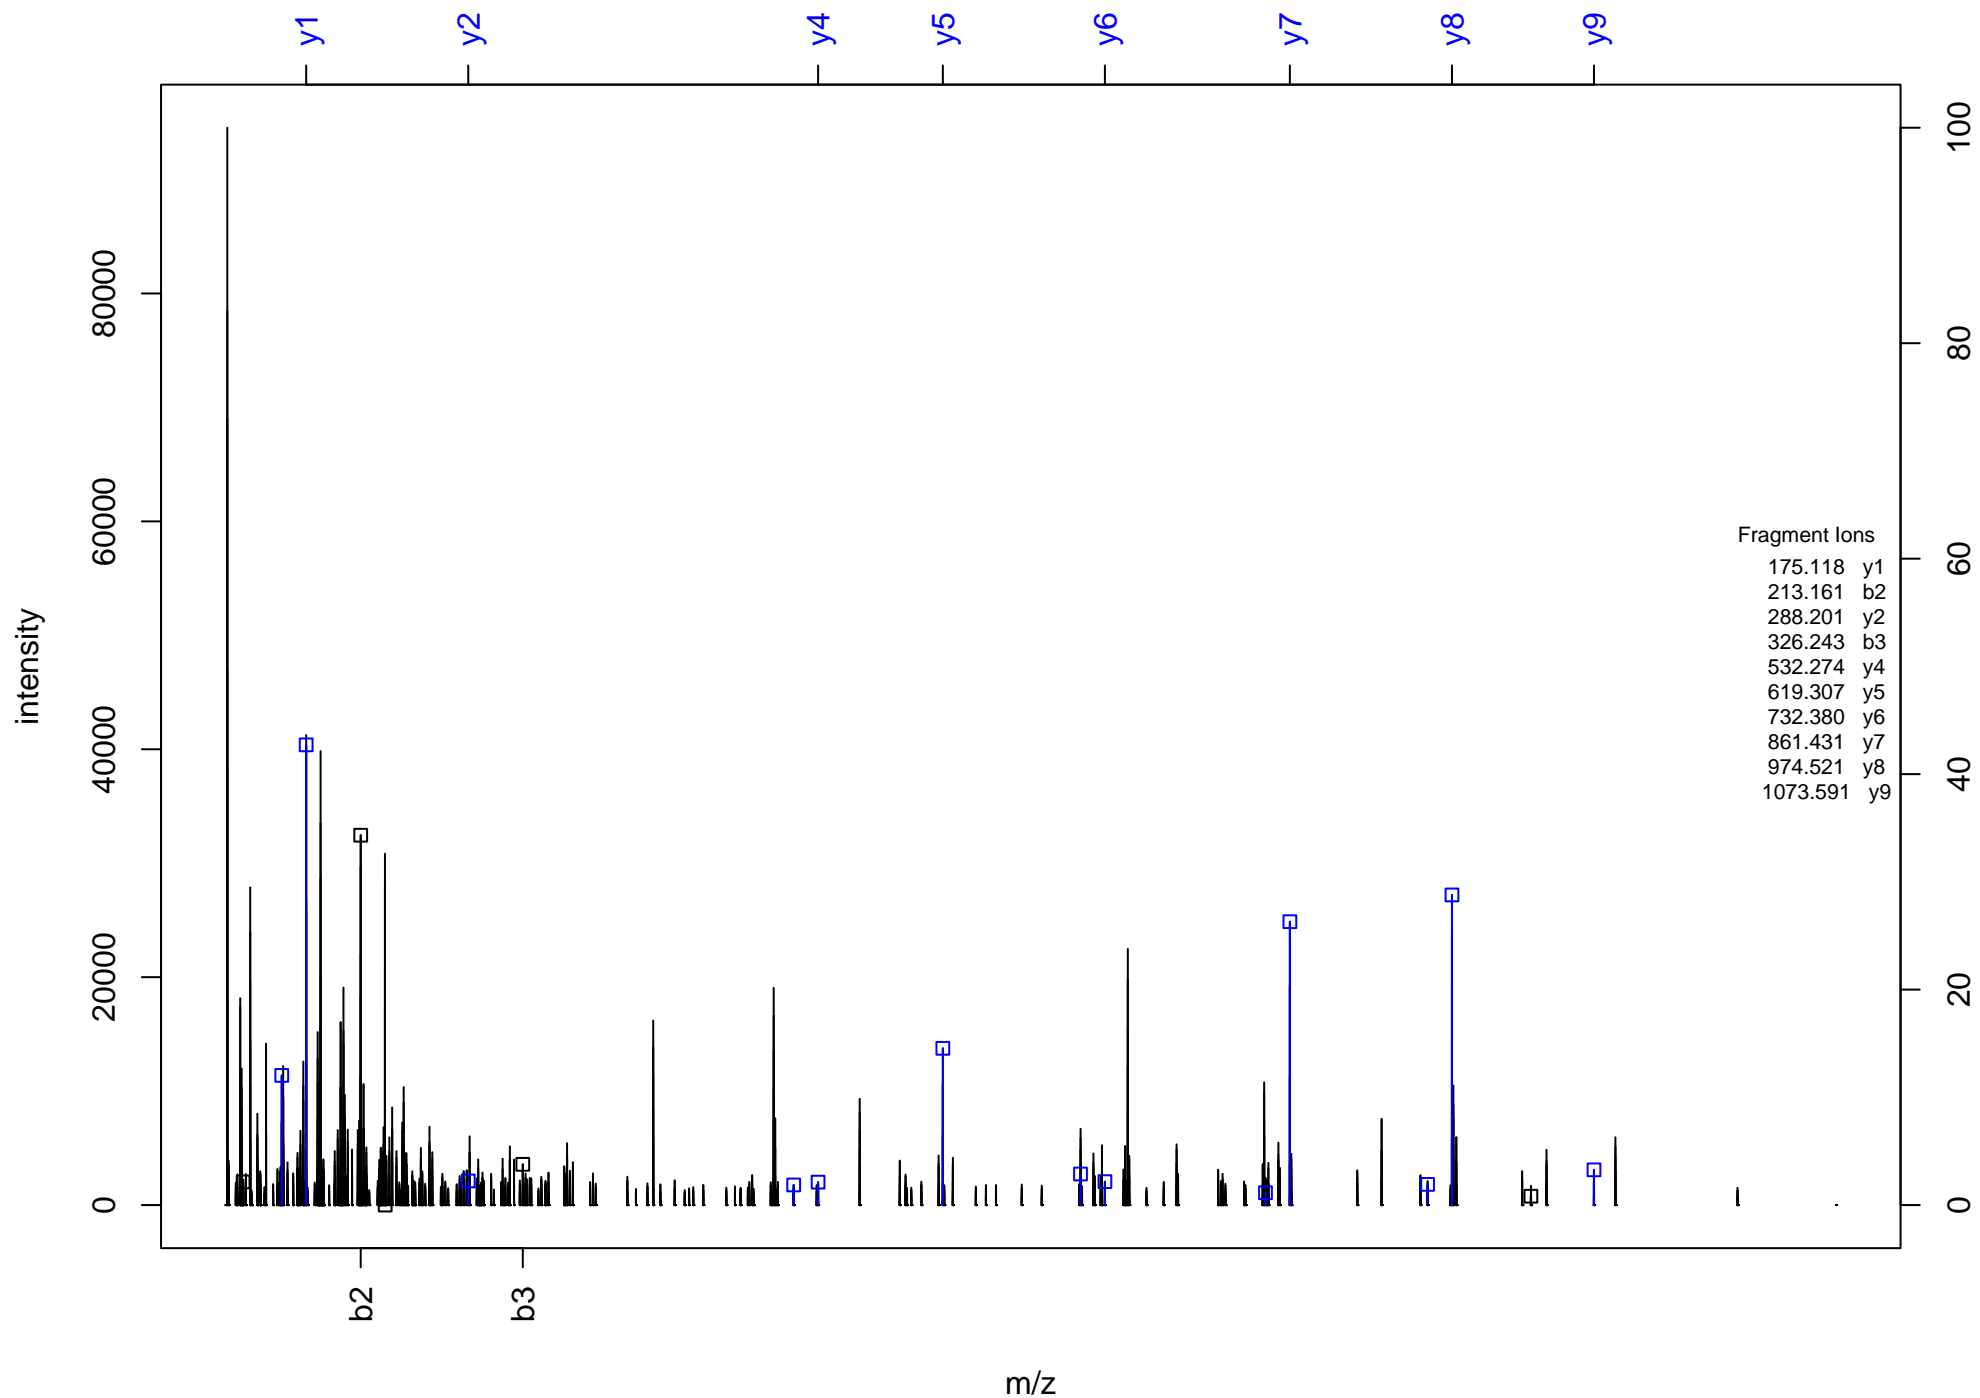

# IFQ^KMN^RQ^DLM\*ER

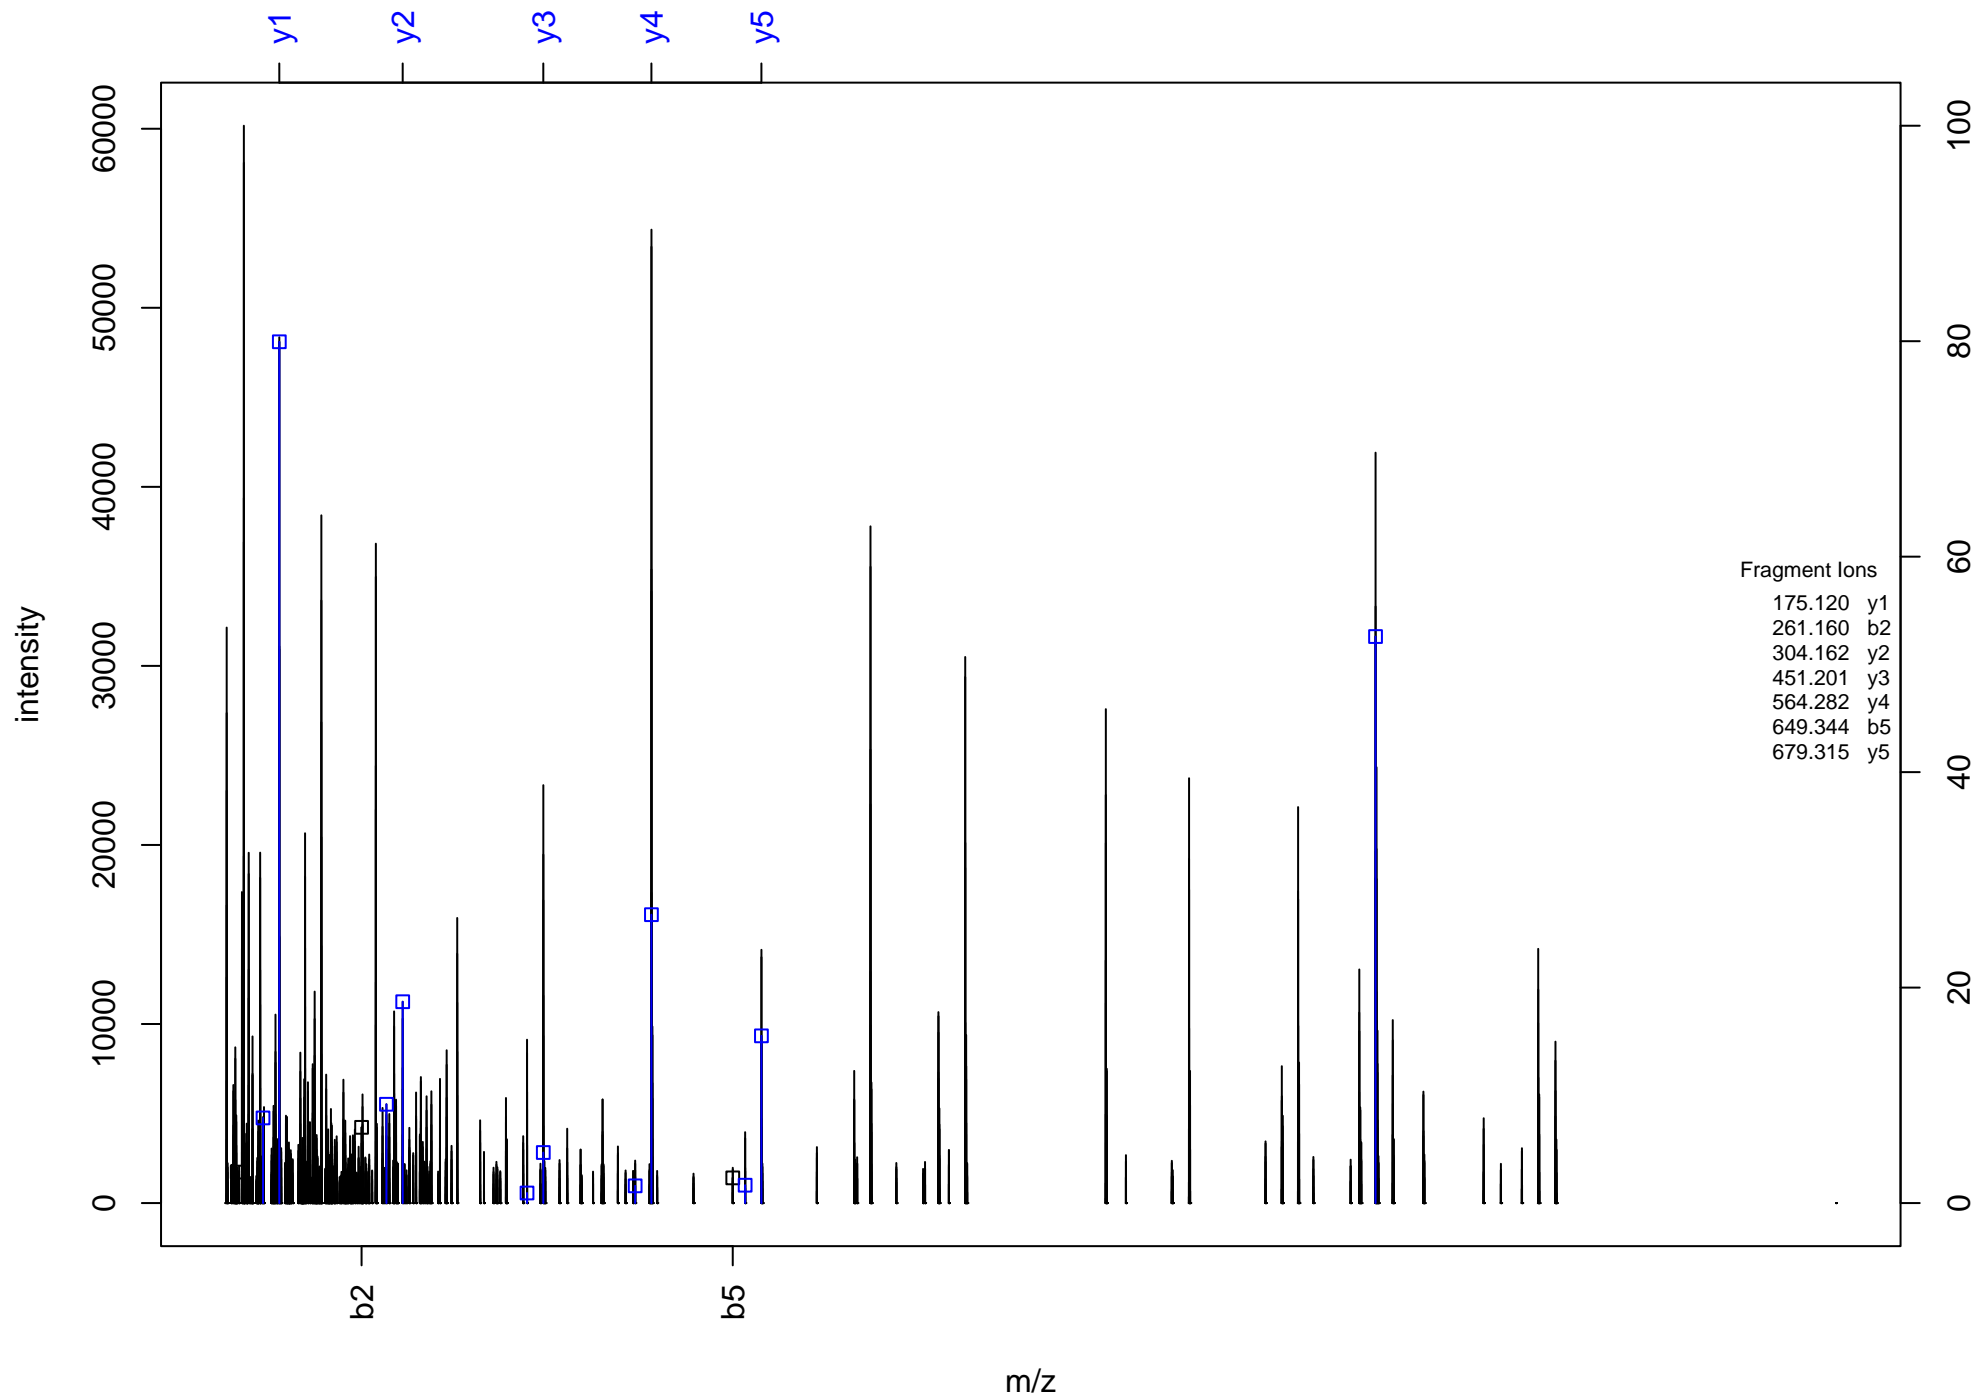

# (Ac)MELGELLYNK

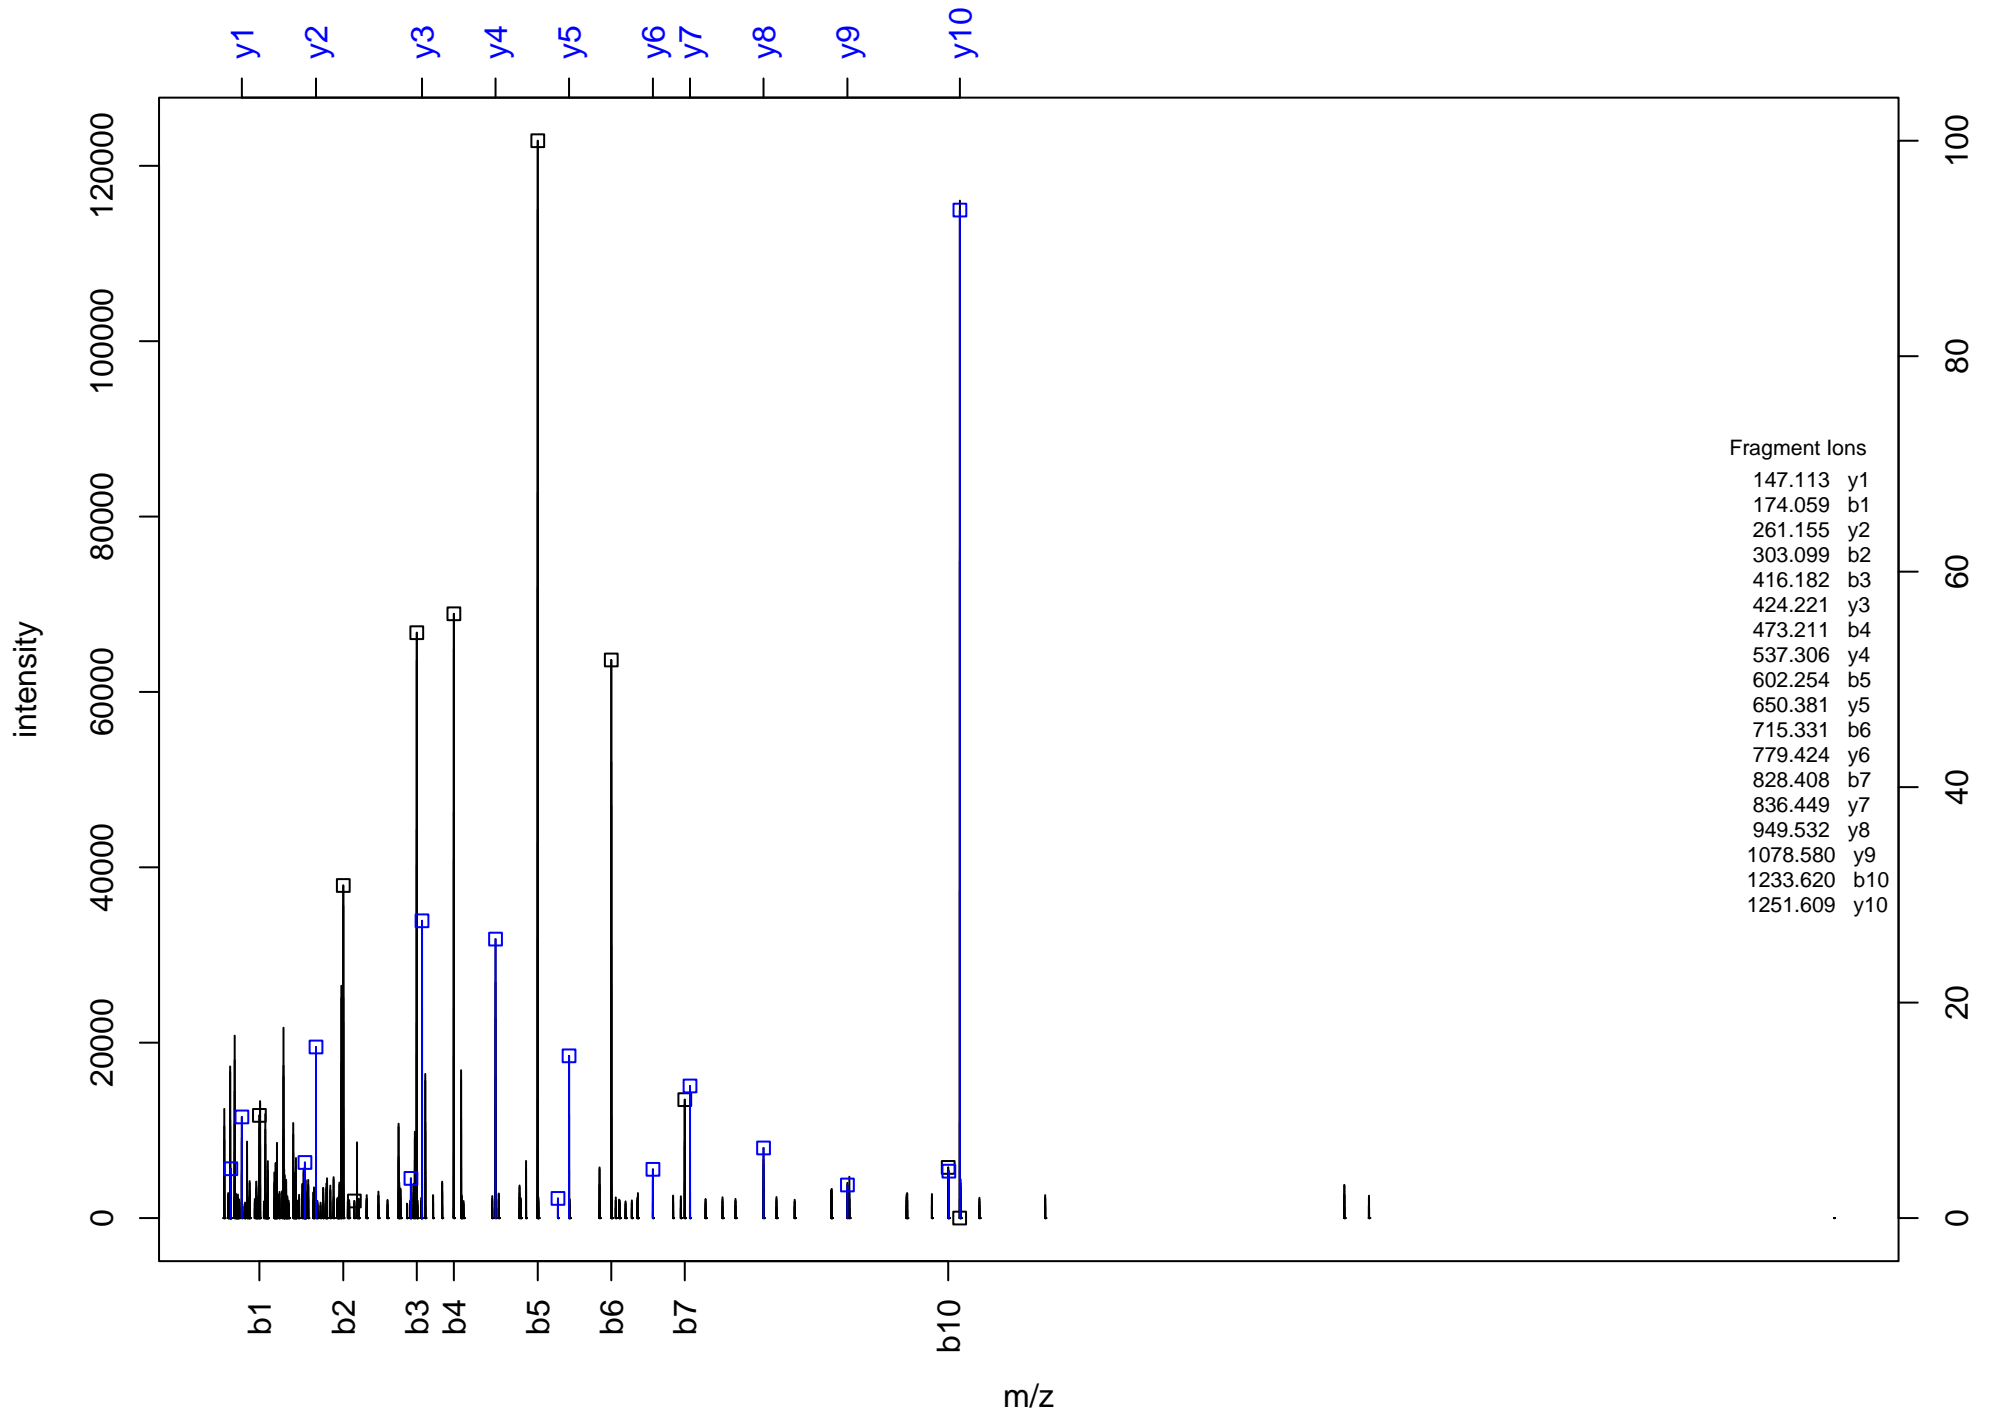

# (Ac)ASFVTEVLAHSGSLEK

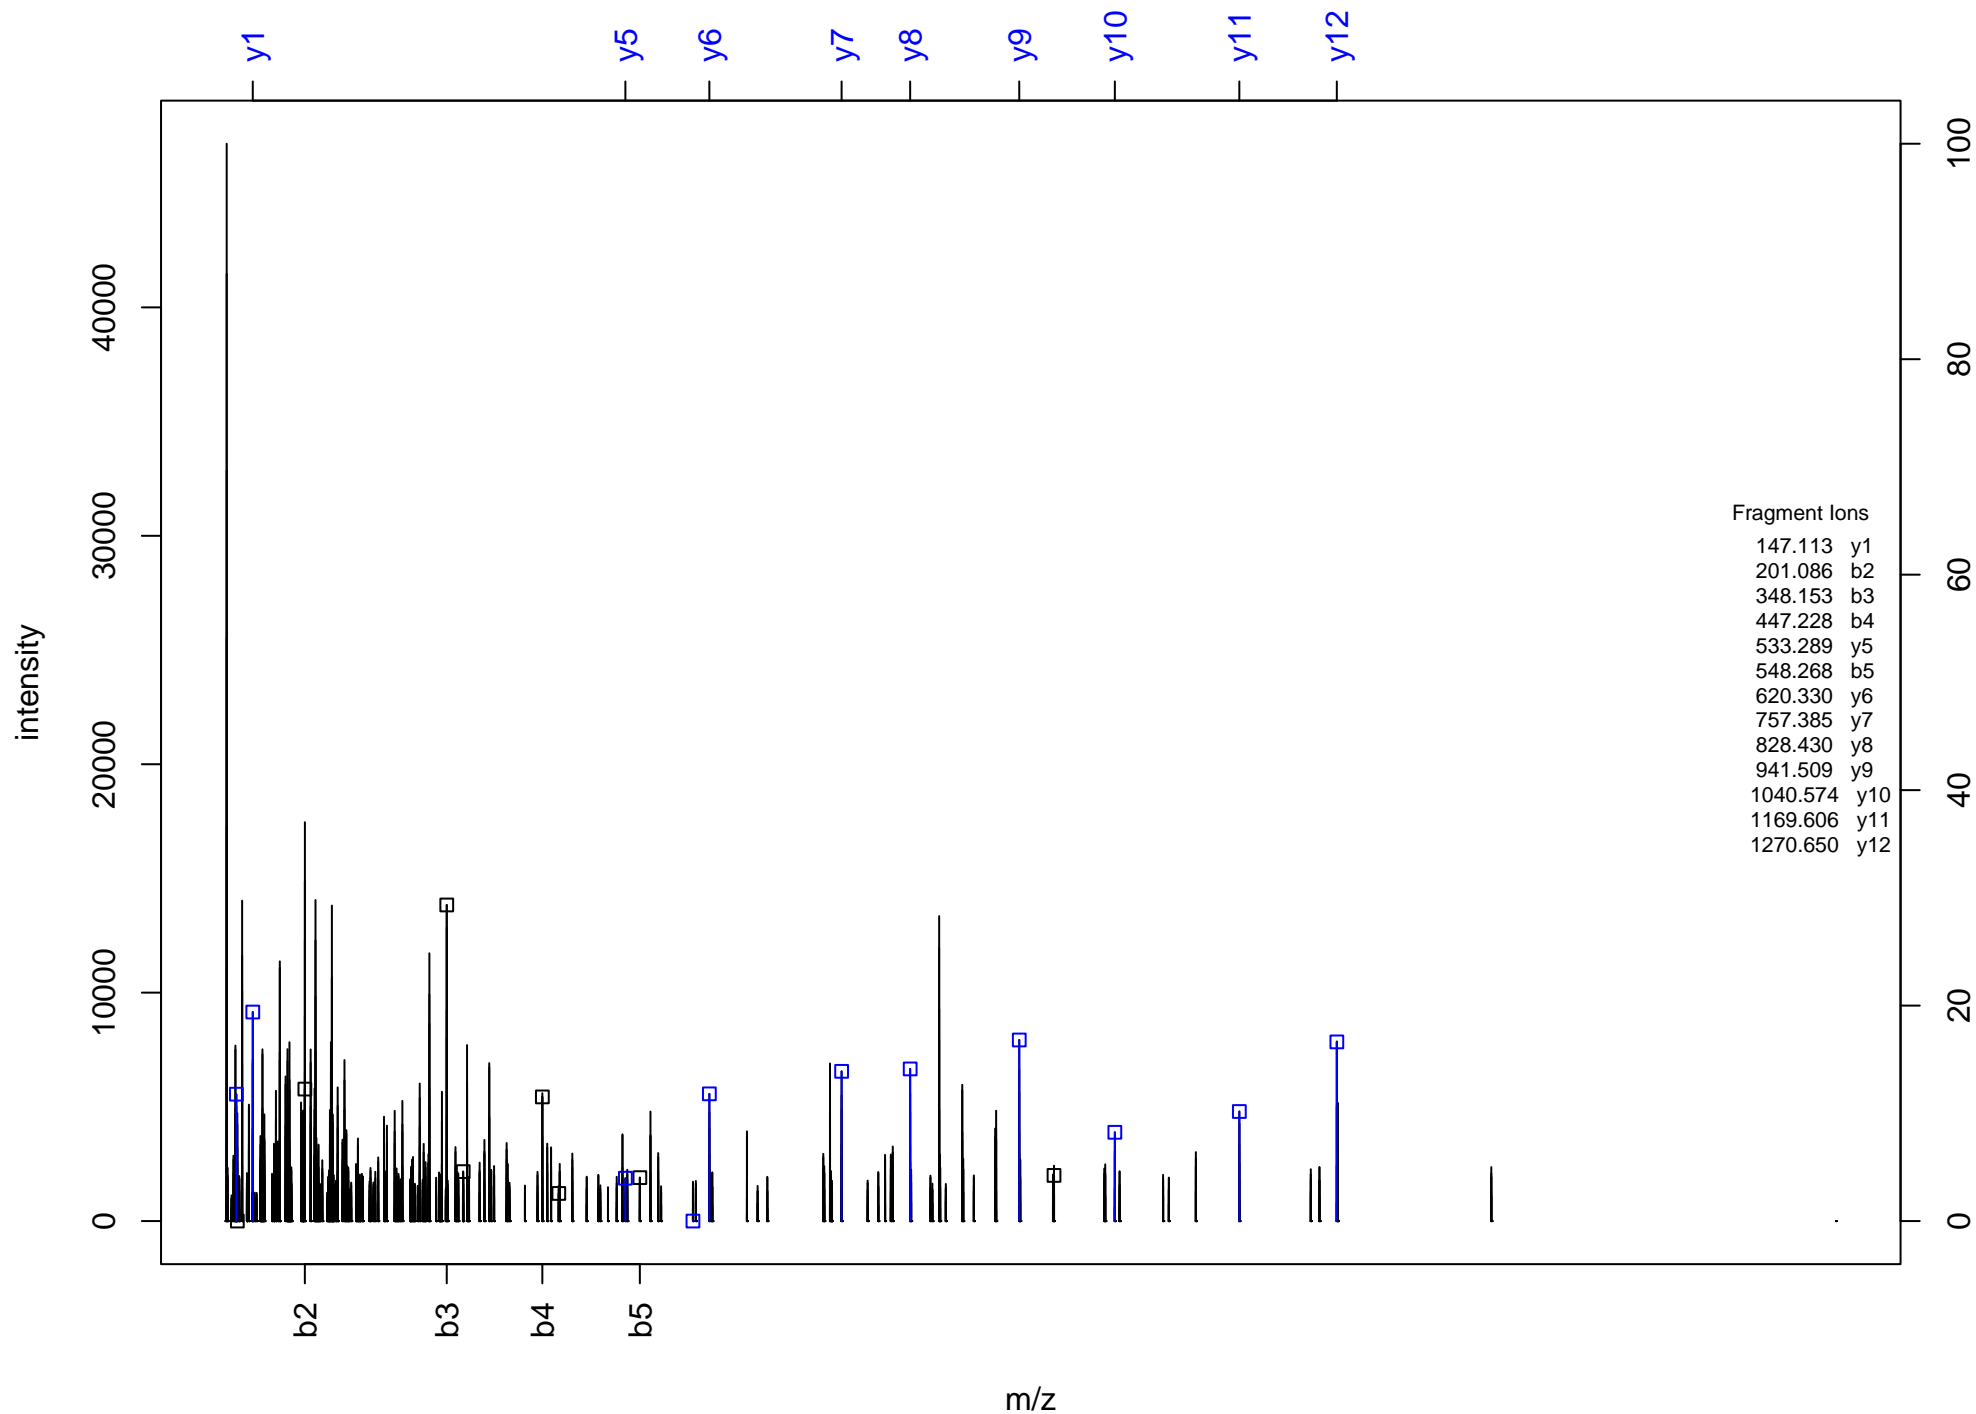



# (Ac)AAEHSDSDSVEPPGSEALLDAVLR

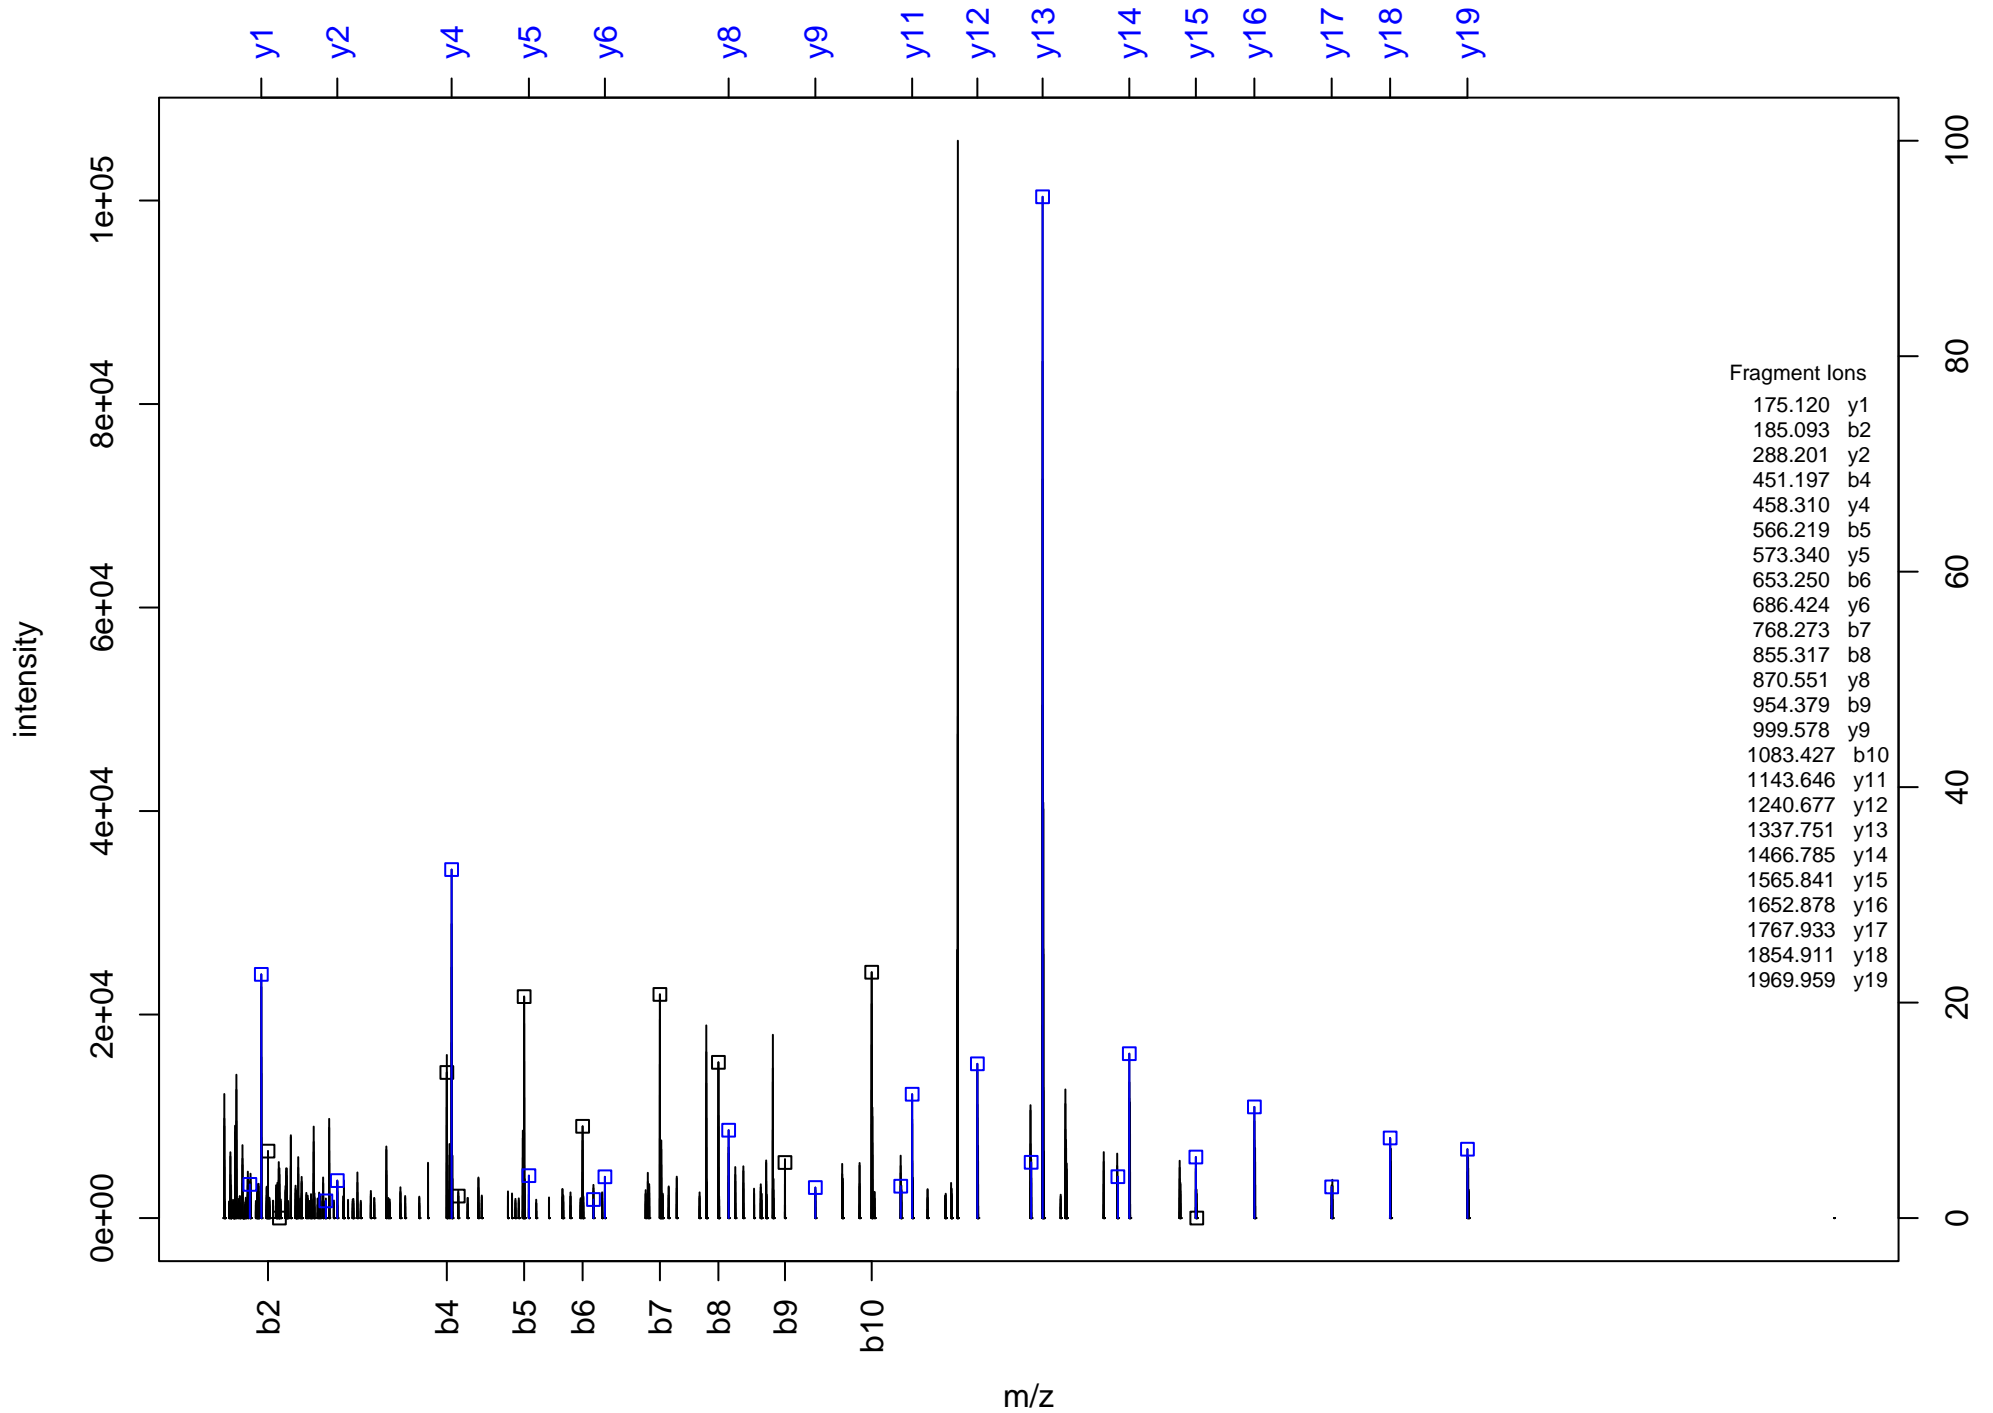

# VLFRPSDATNSSNLDALSSNTSLK

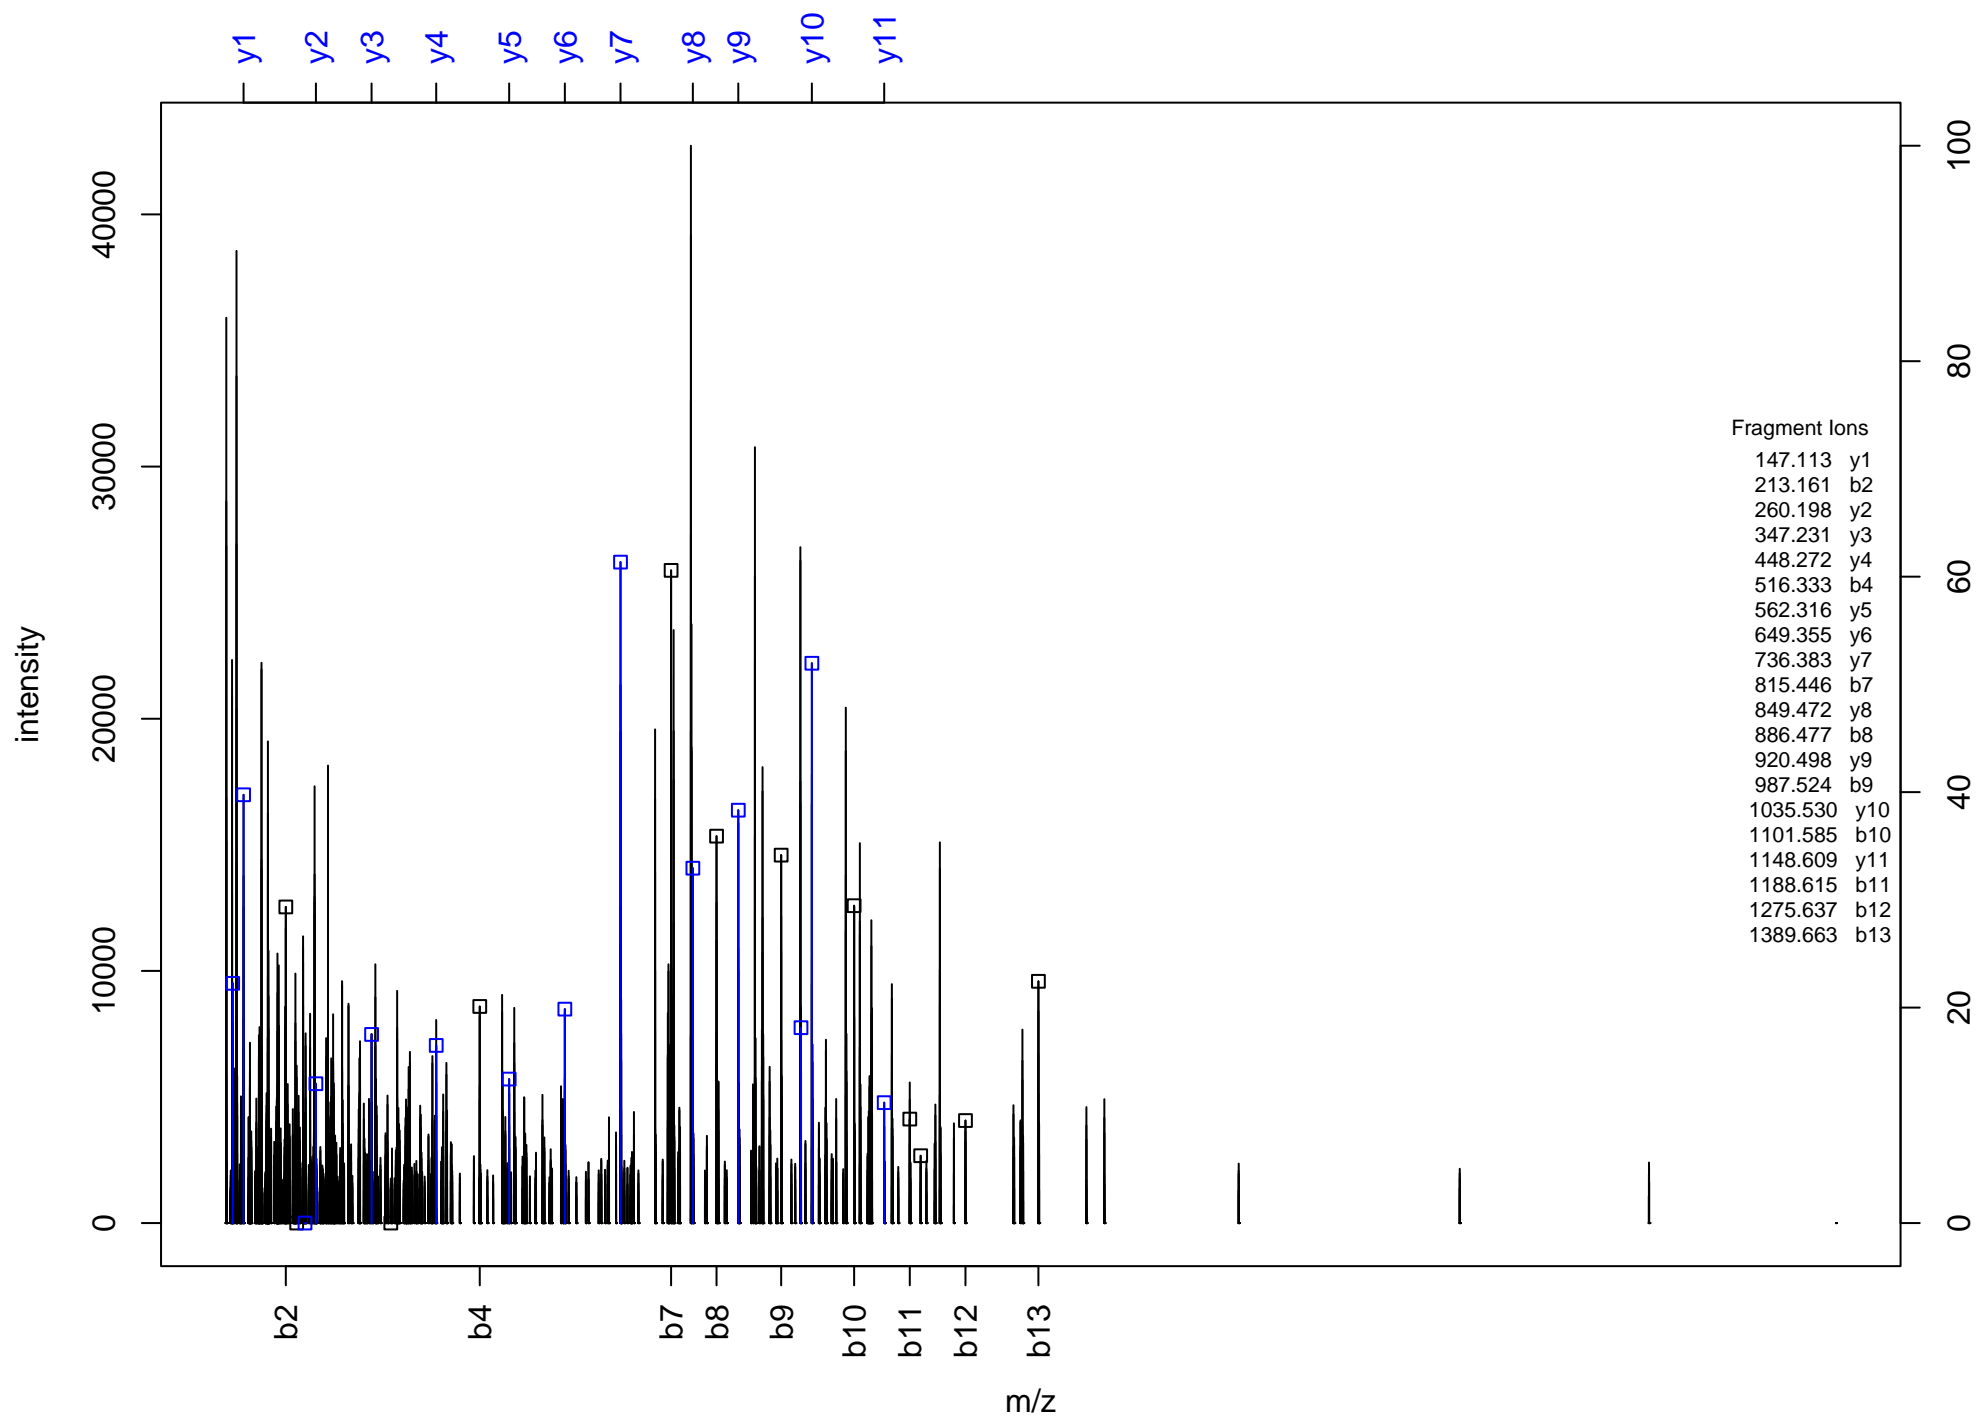

# (Ac)MAVYQTYVNAM\*N^DKIR

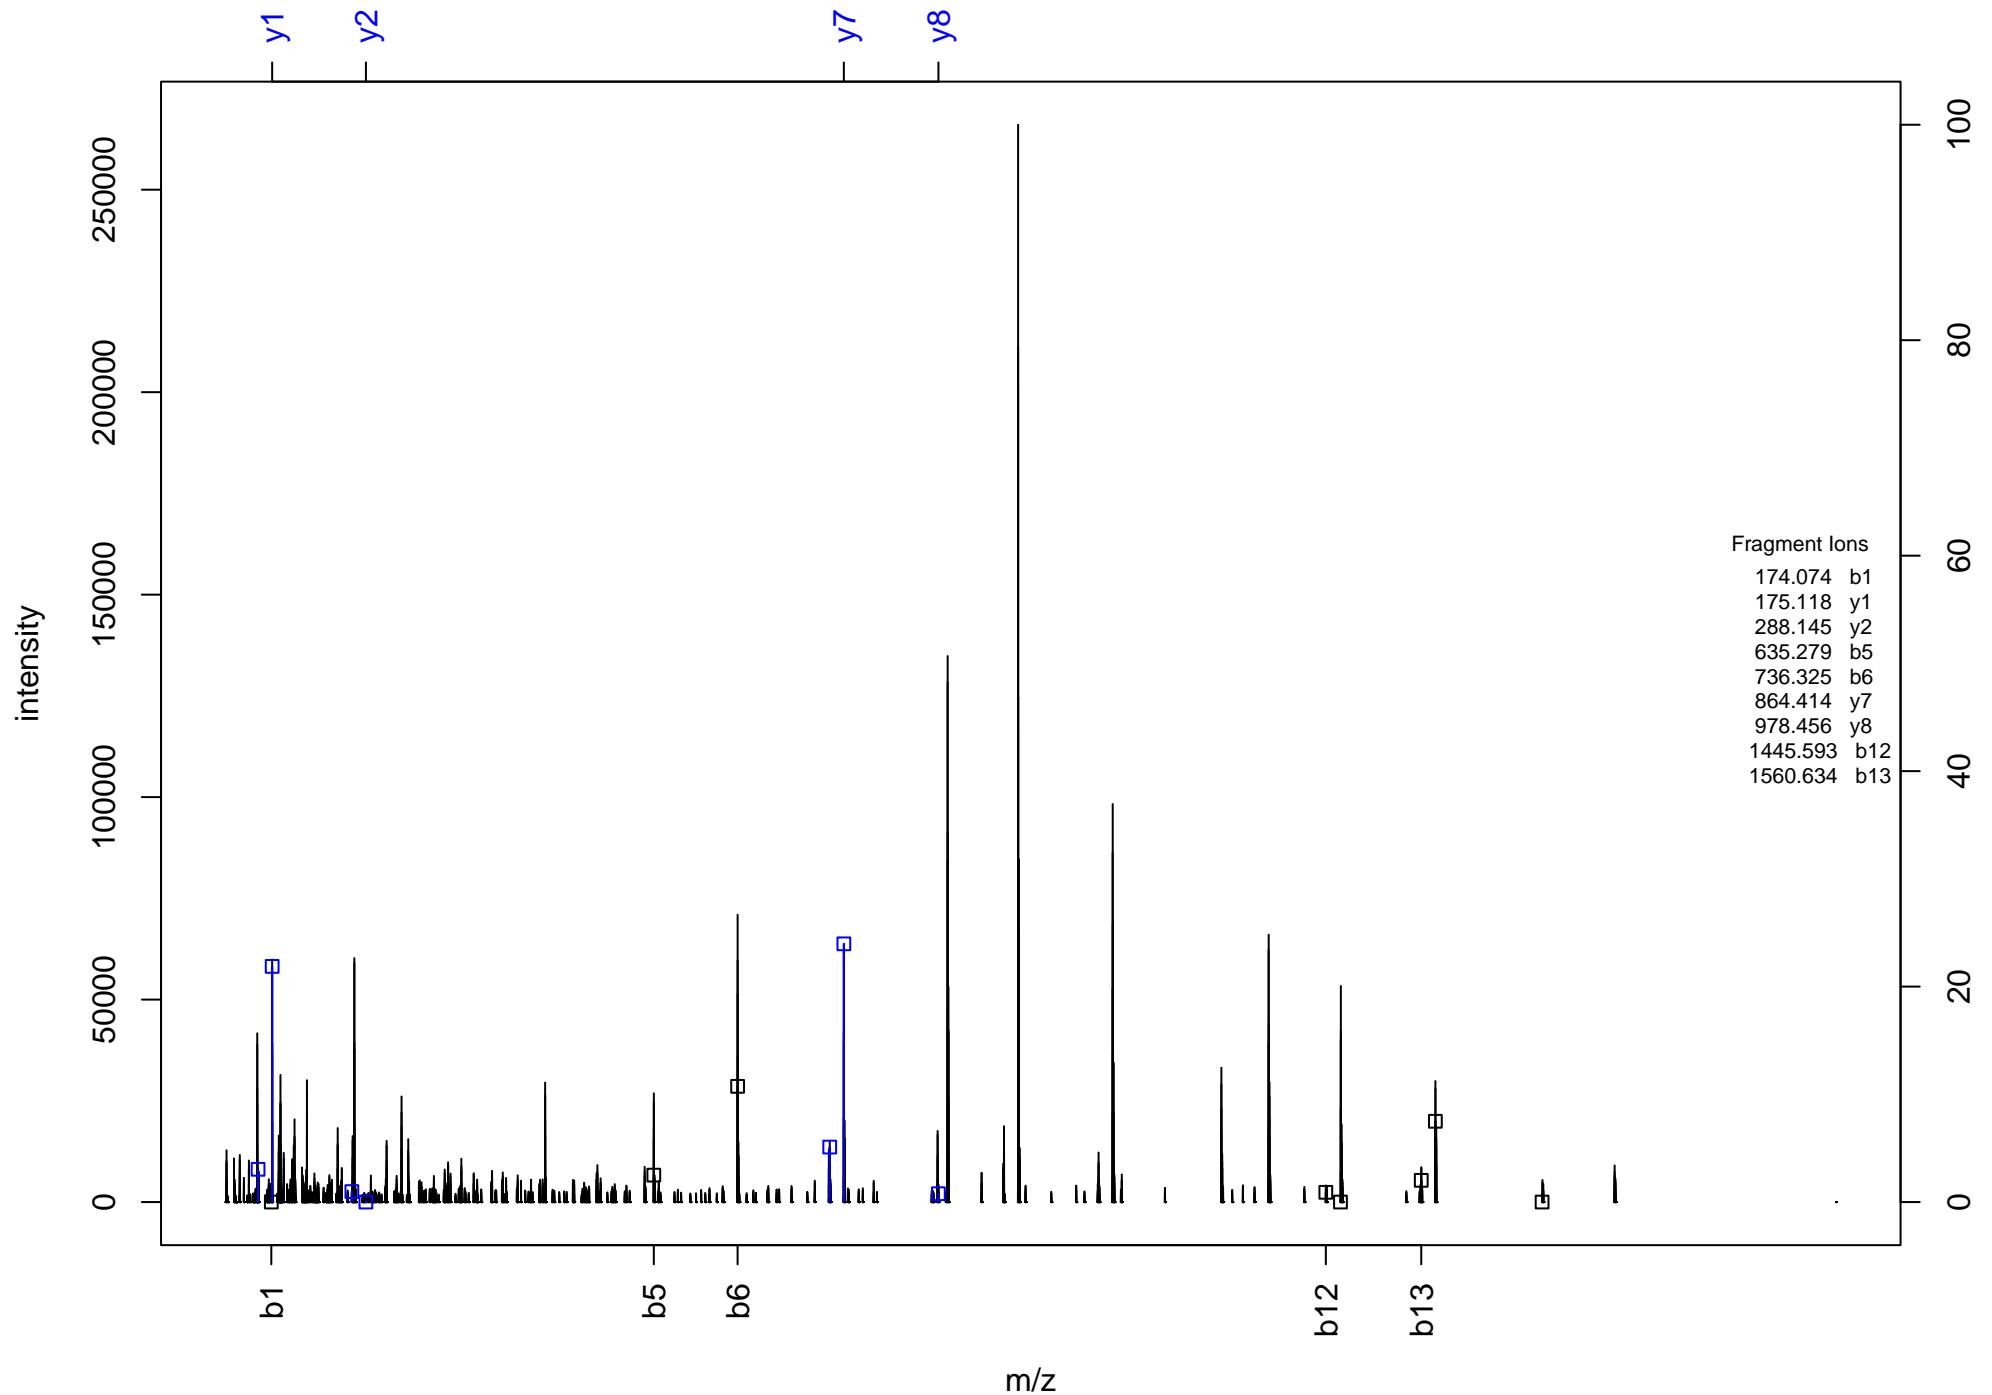

# YFCCGNYFPGYPCYGTNFGHTYR

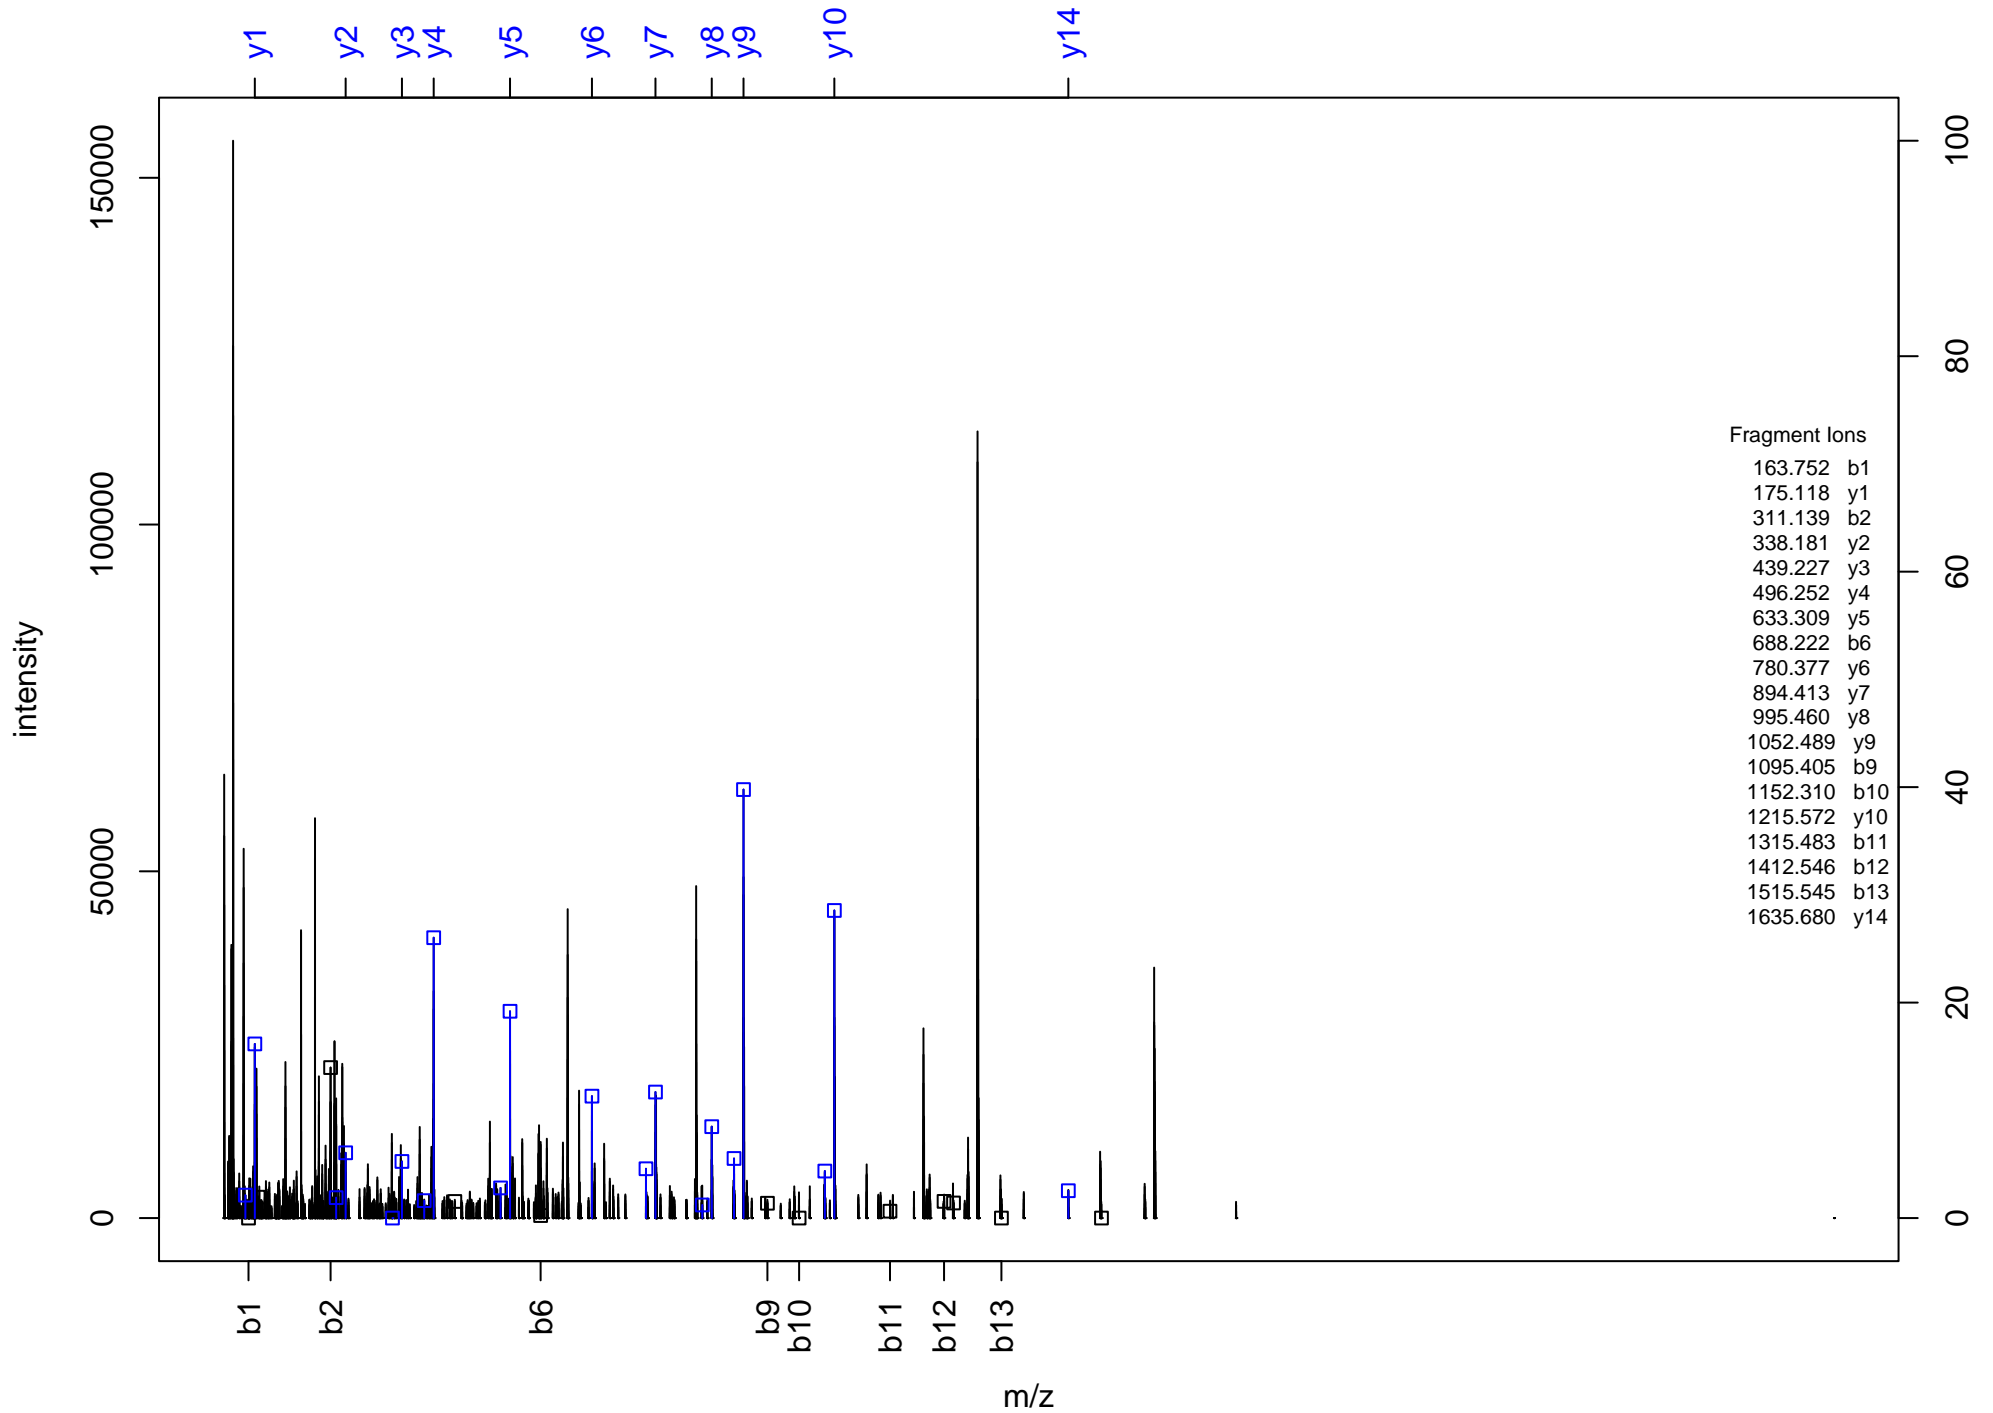

# THN^VEAPNLQ^NKM\*CN^LR

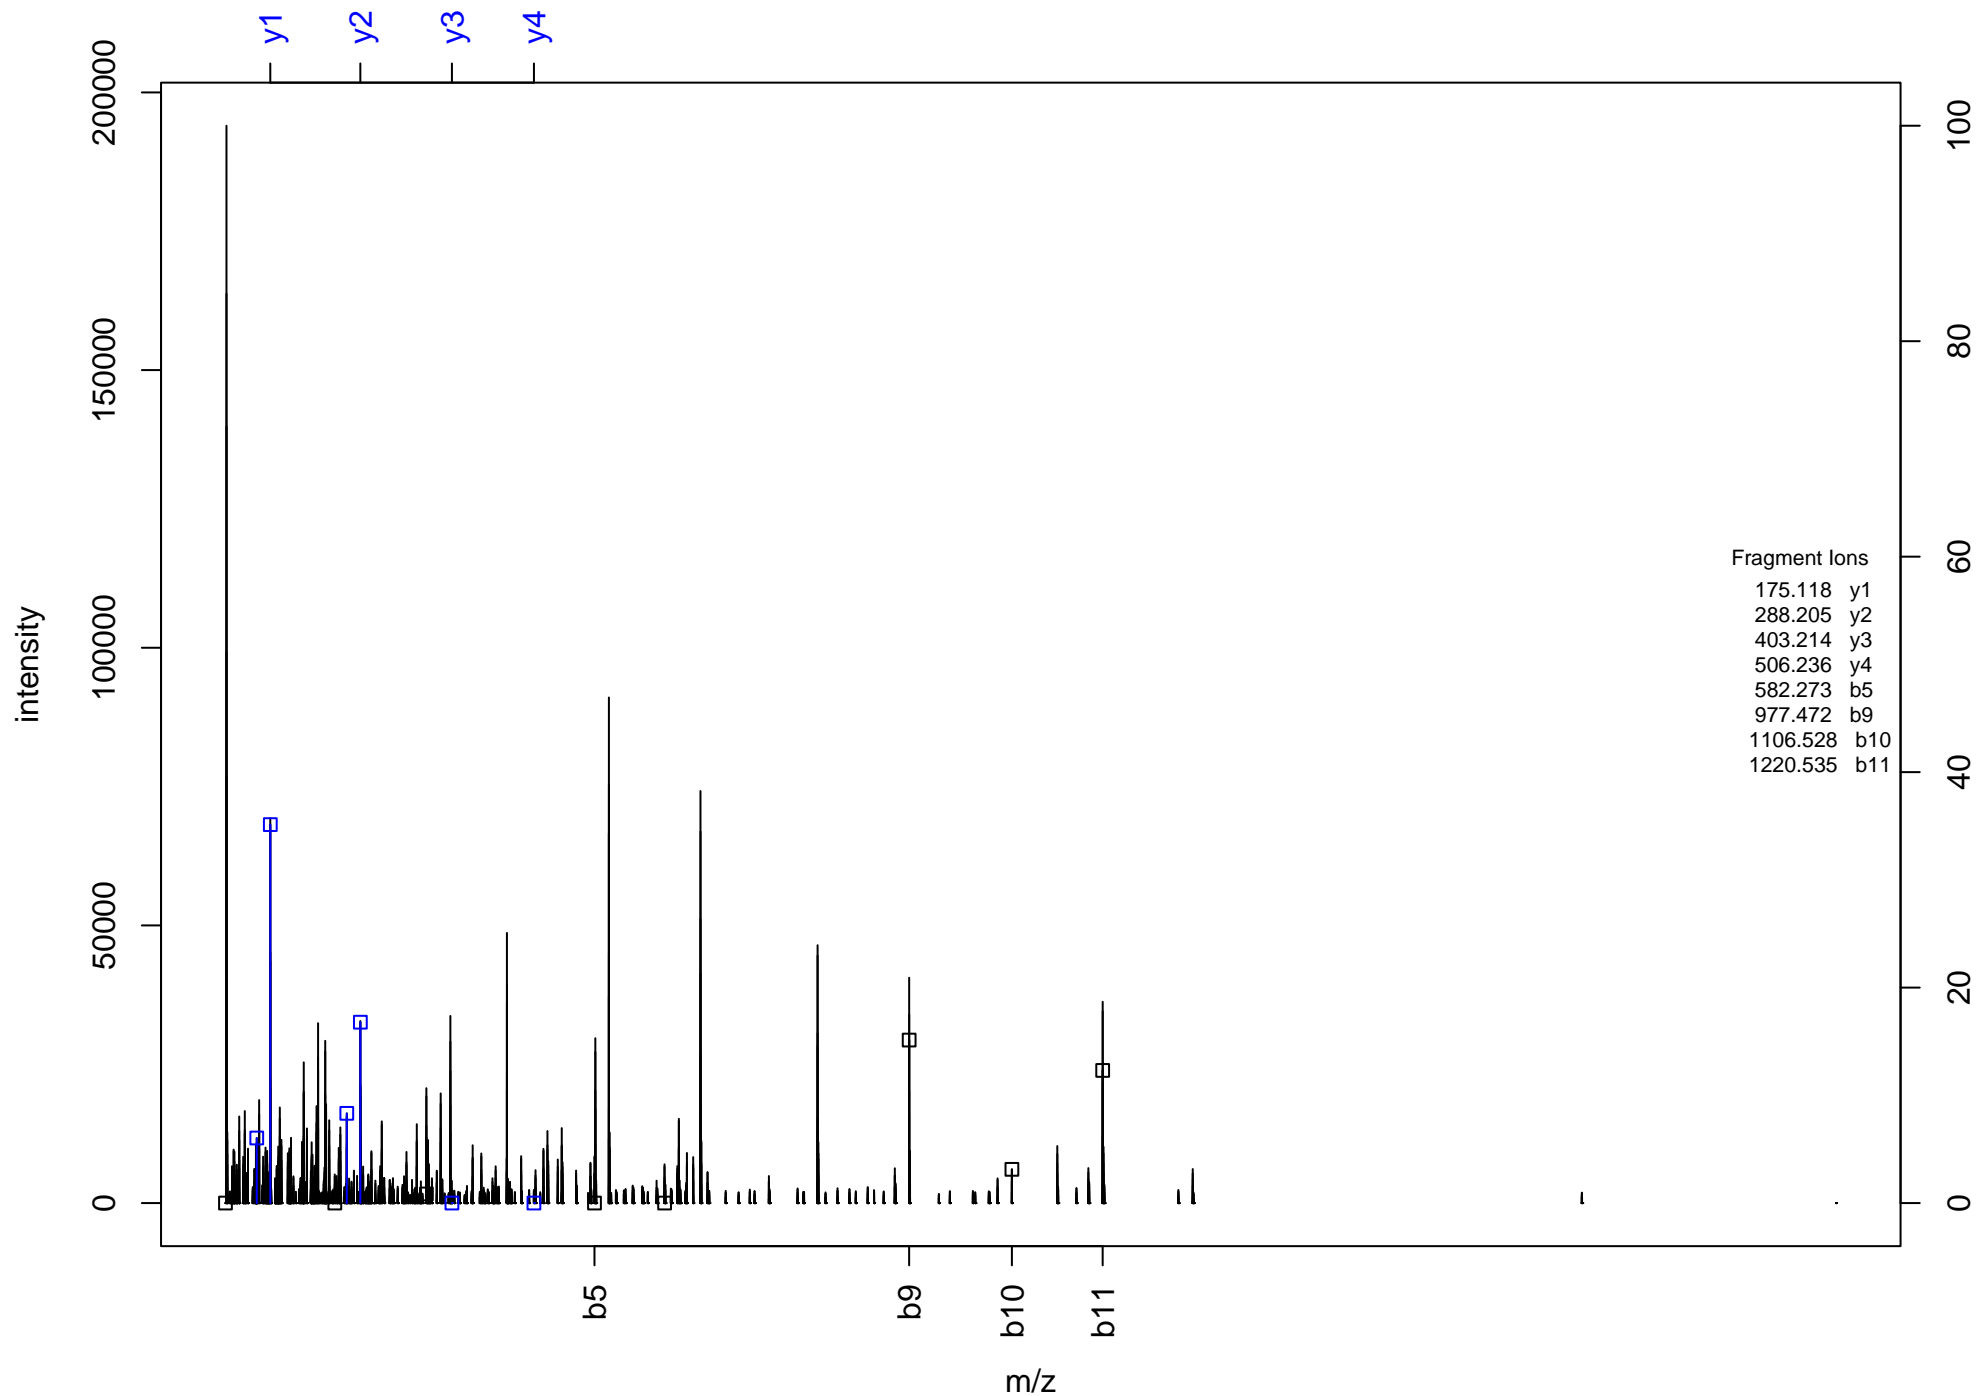

# N<sup>+</sup>FN<sup>+</sup>KTPVPFGGPHVR

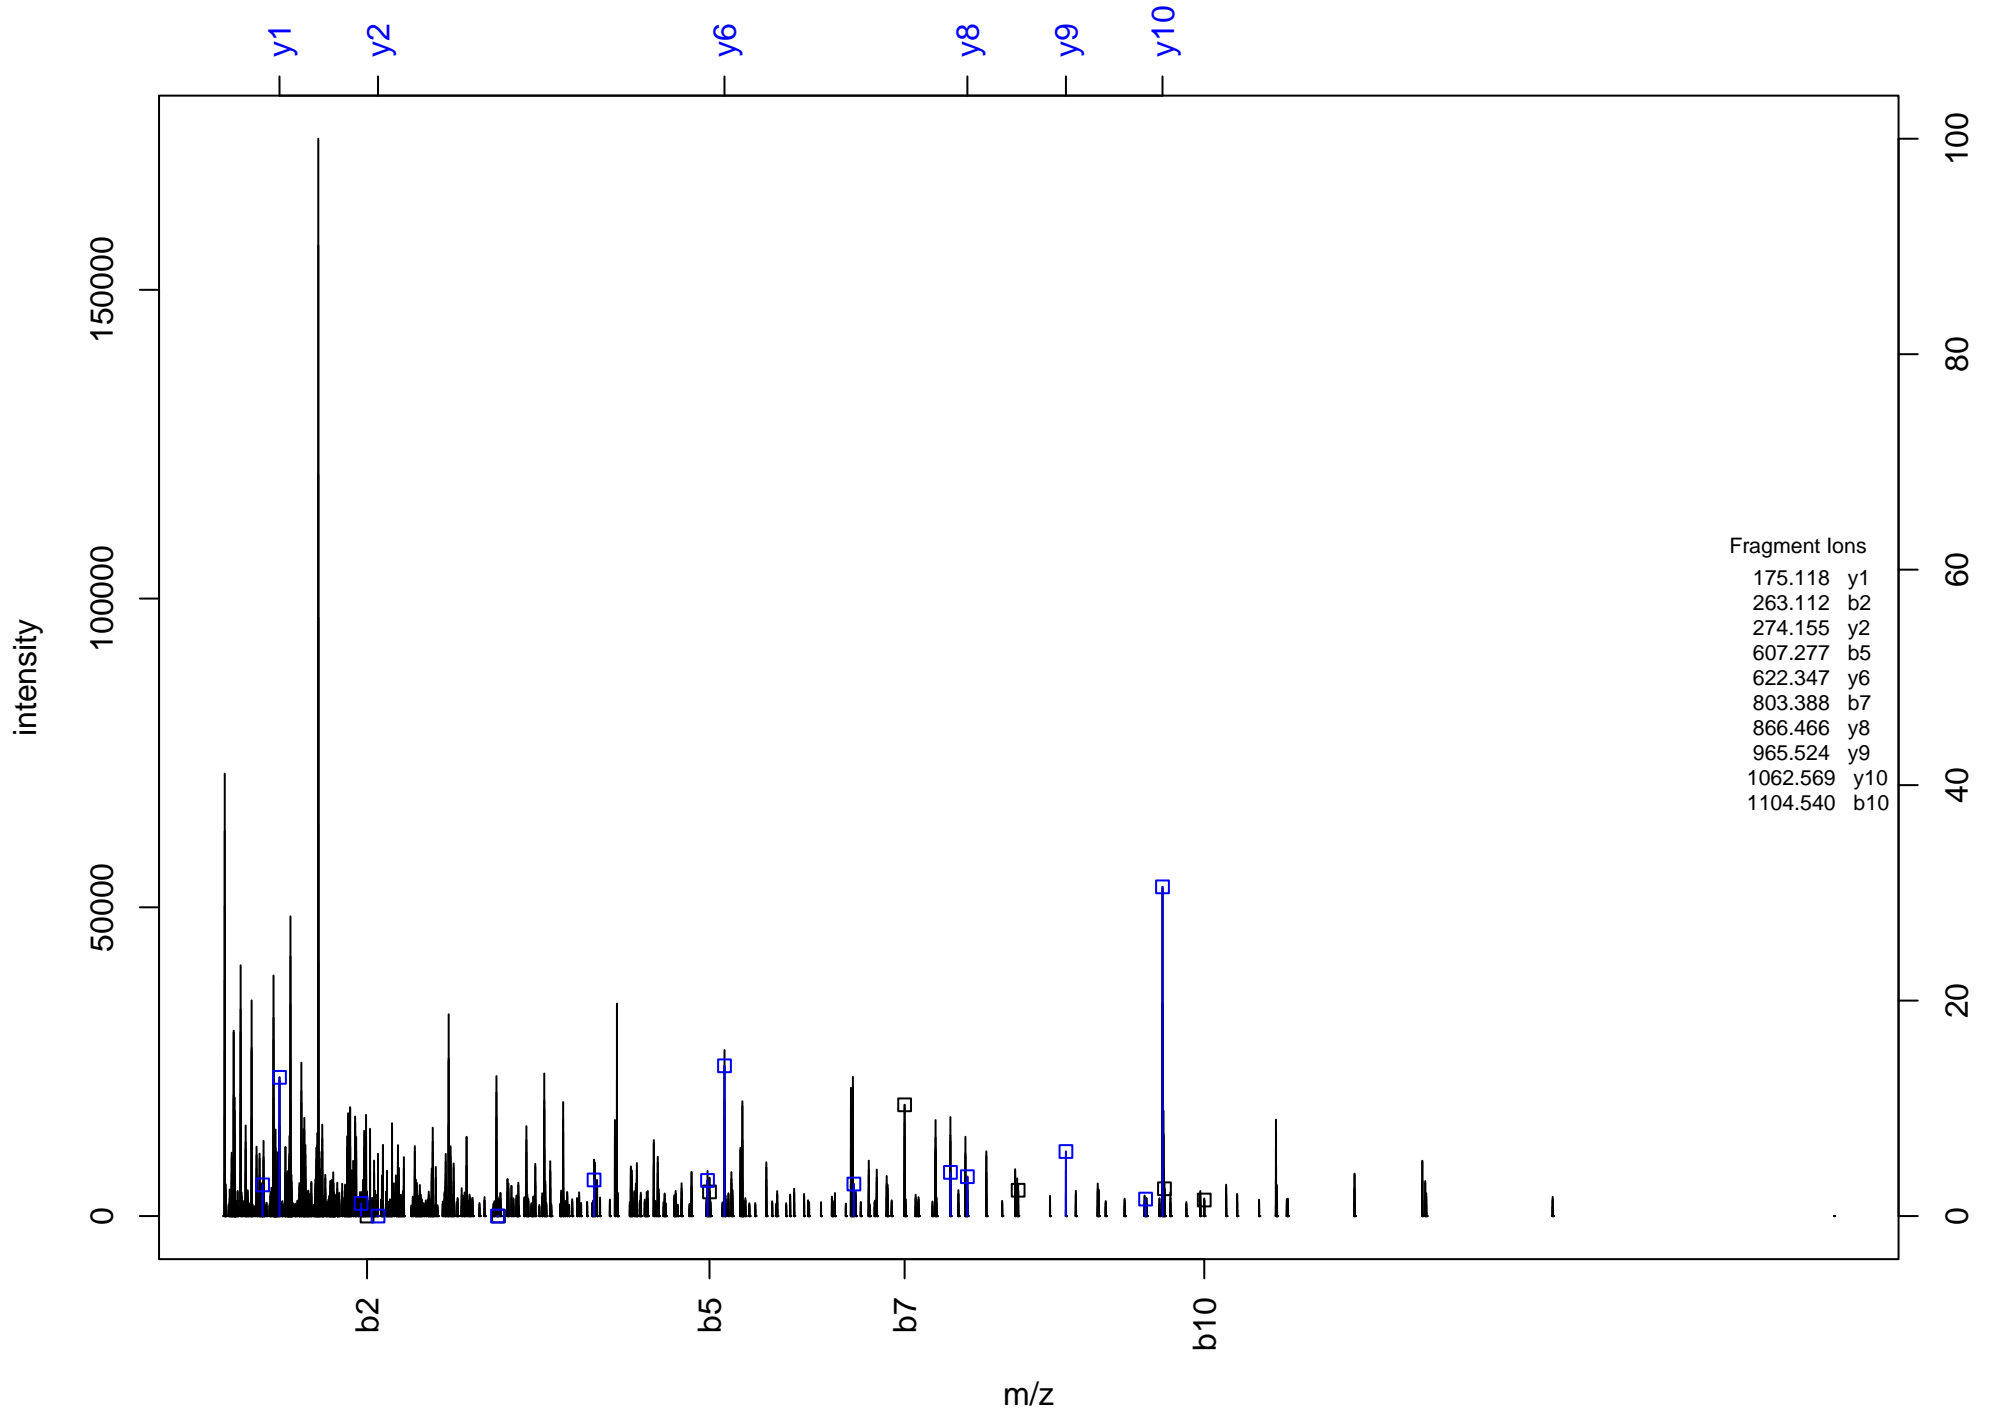

# LPFTALGSGQGAAVALLEDR

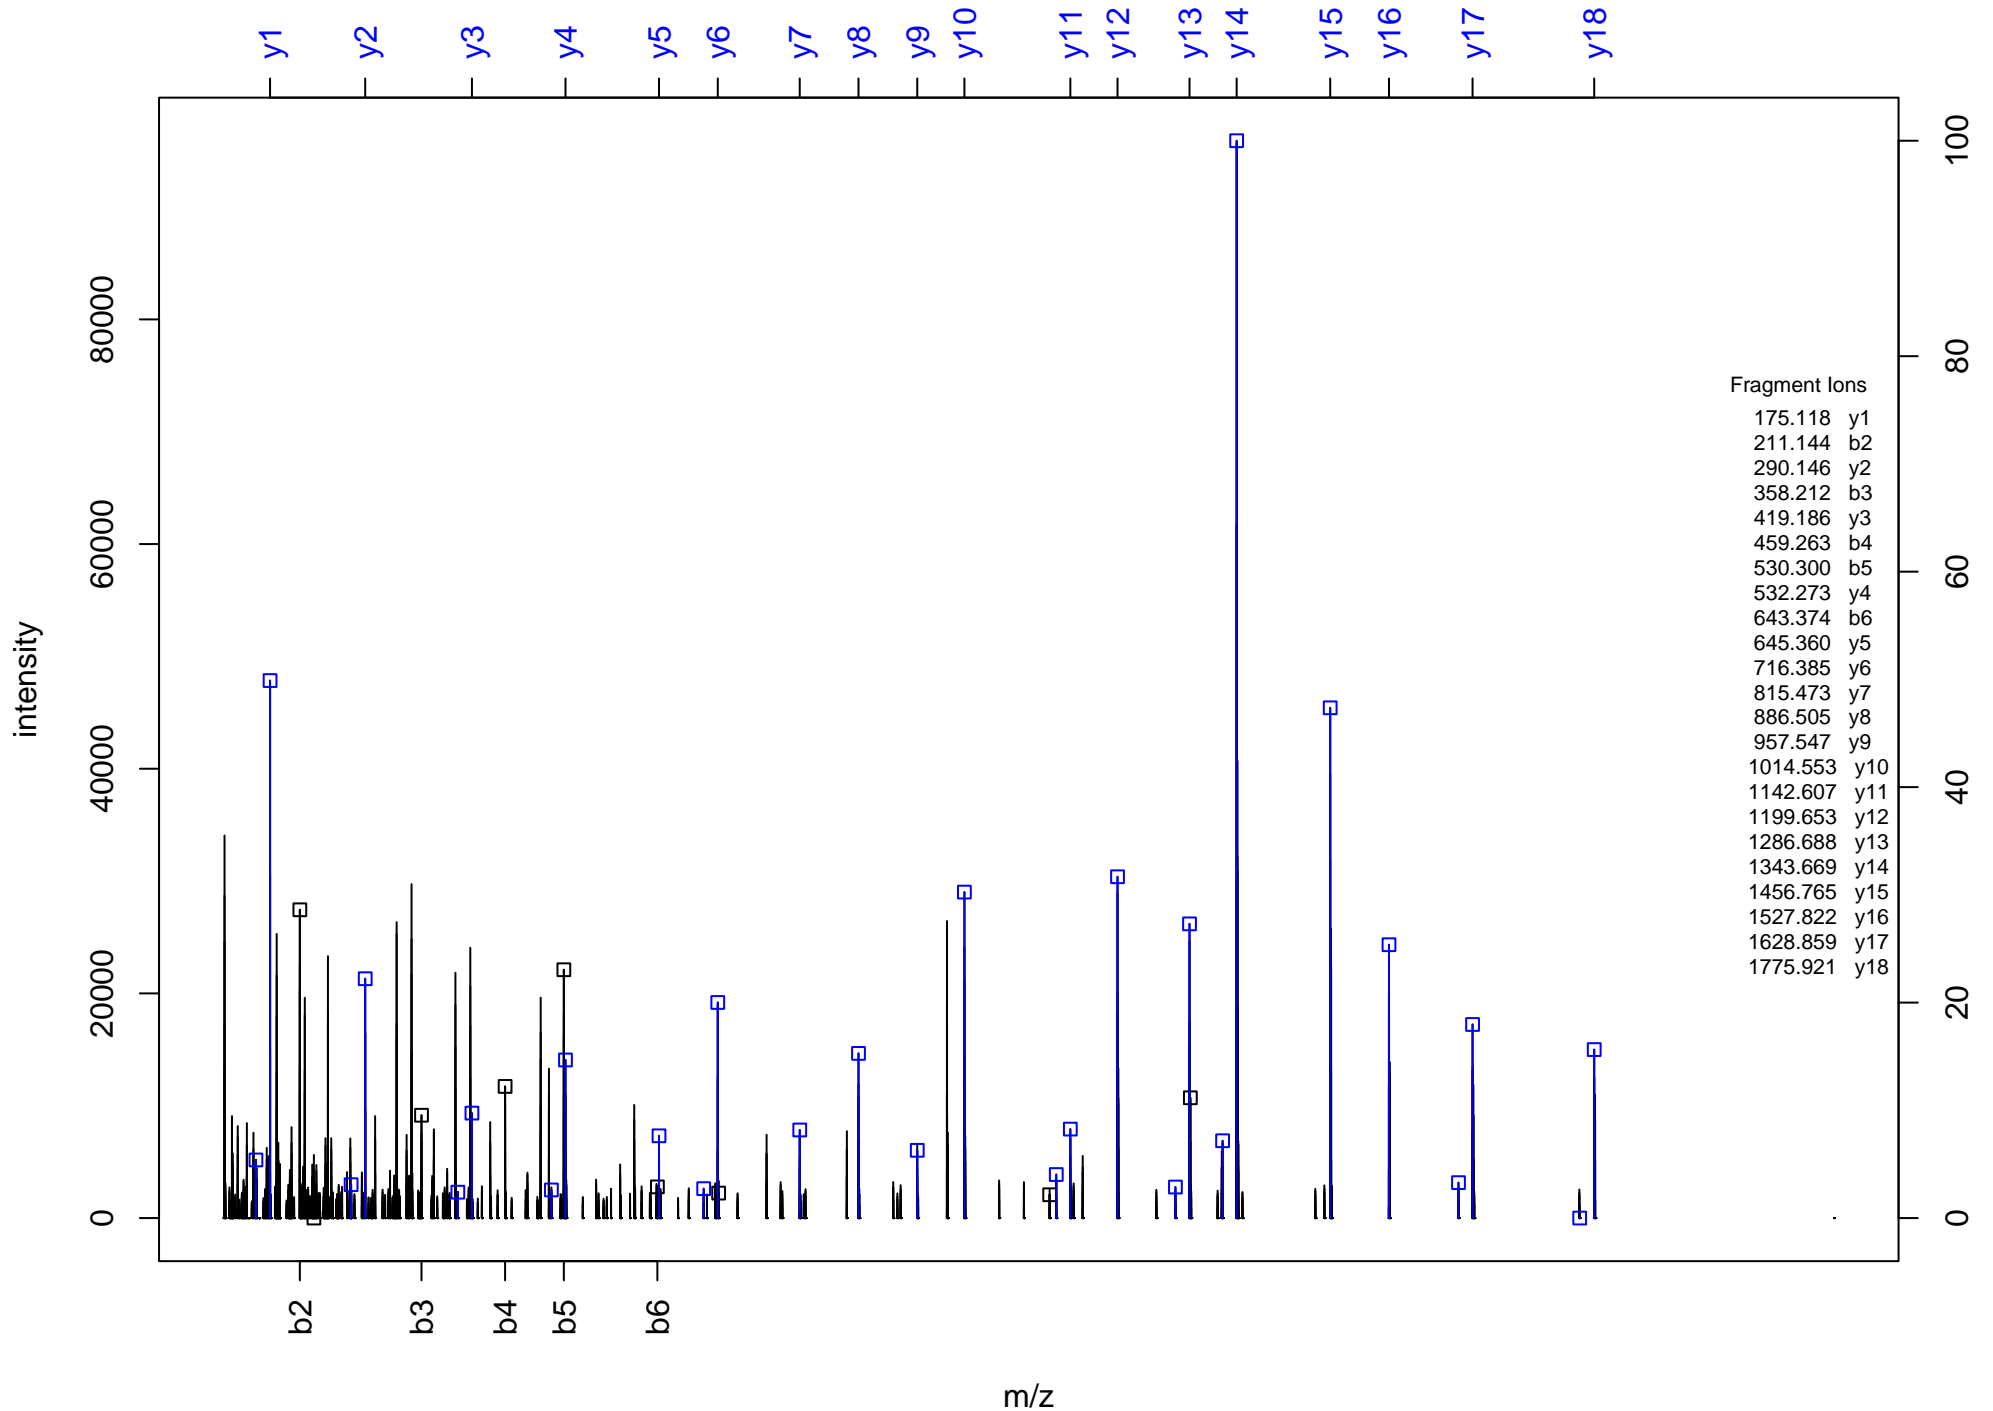

# LFLVQTVQQASK

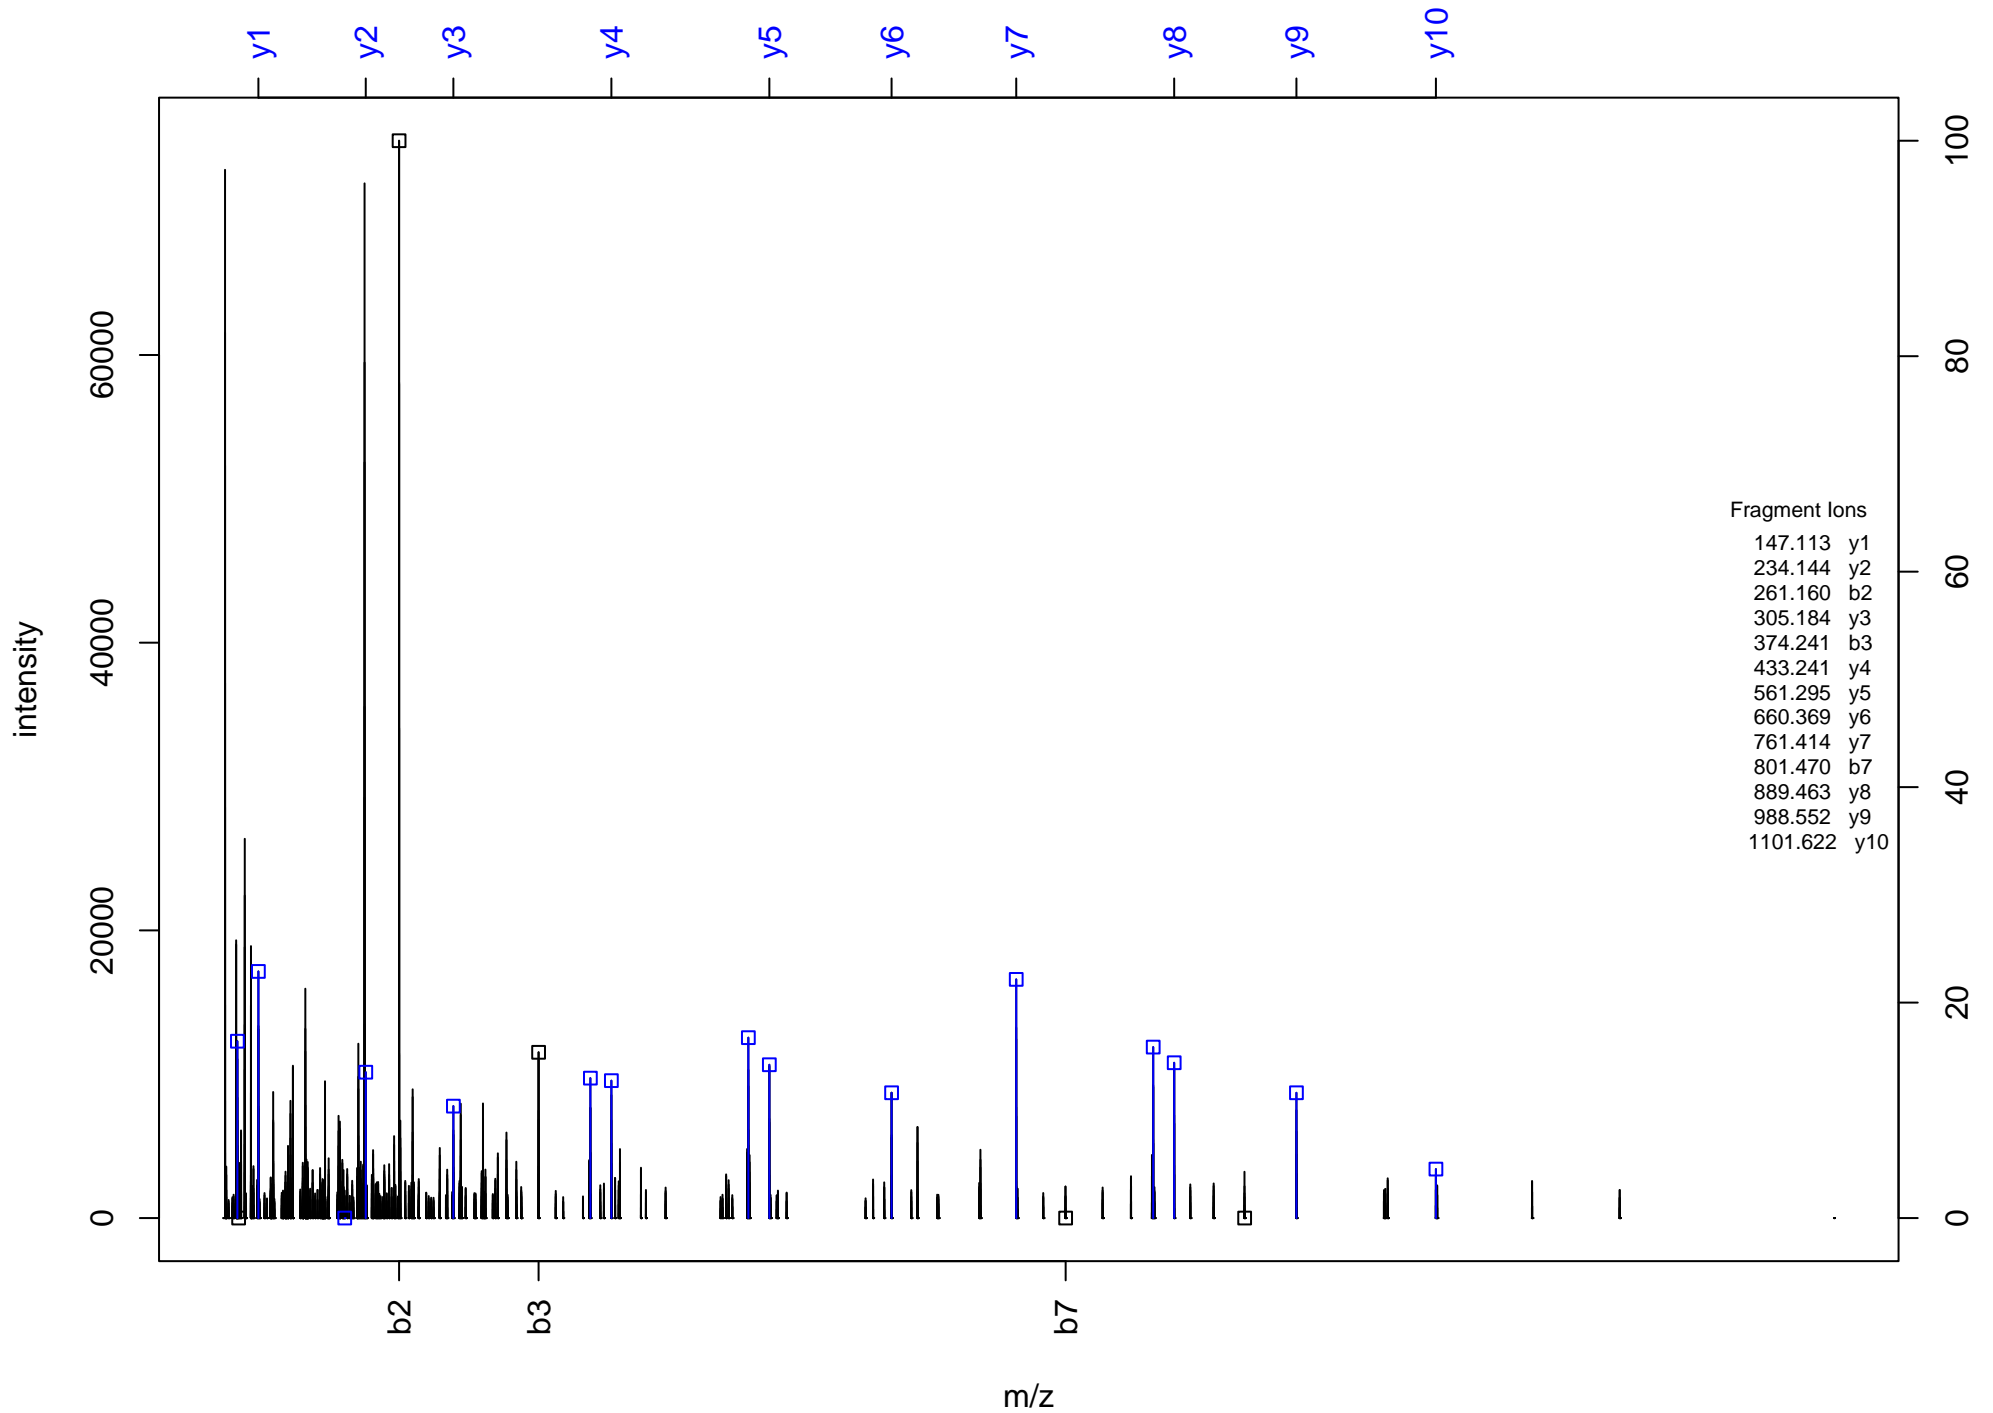



# HRATLVGLFN<sup>N</sup>LR

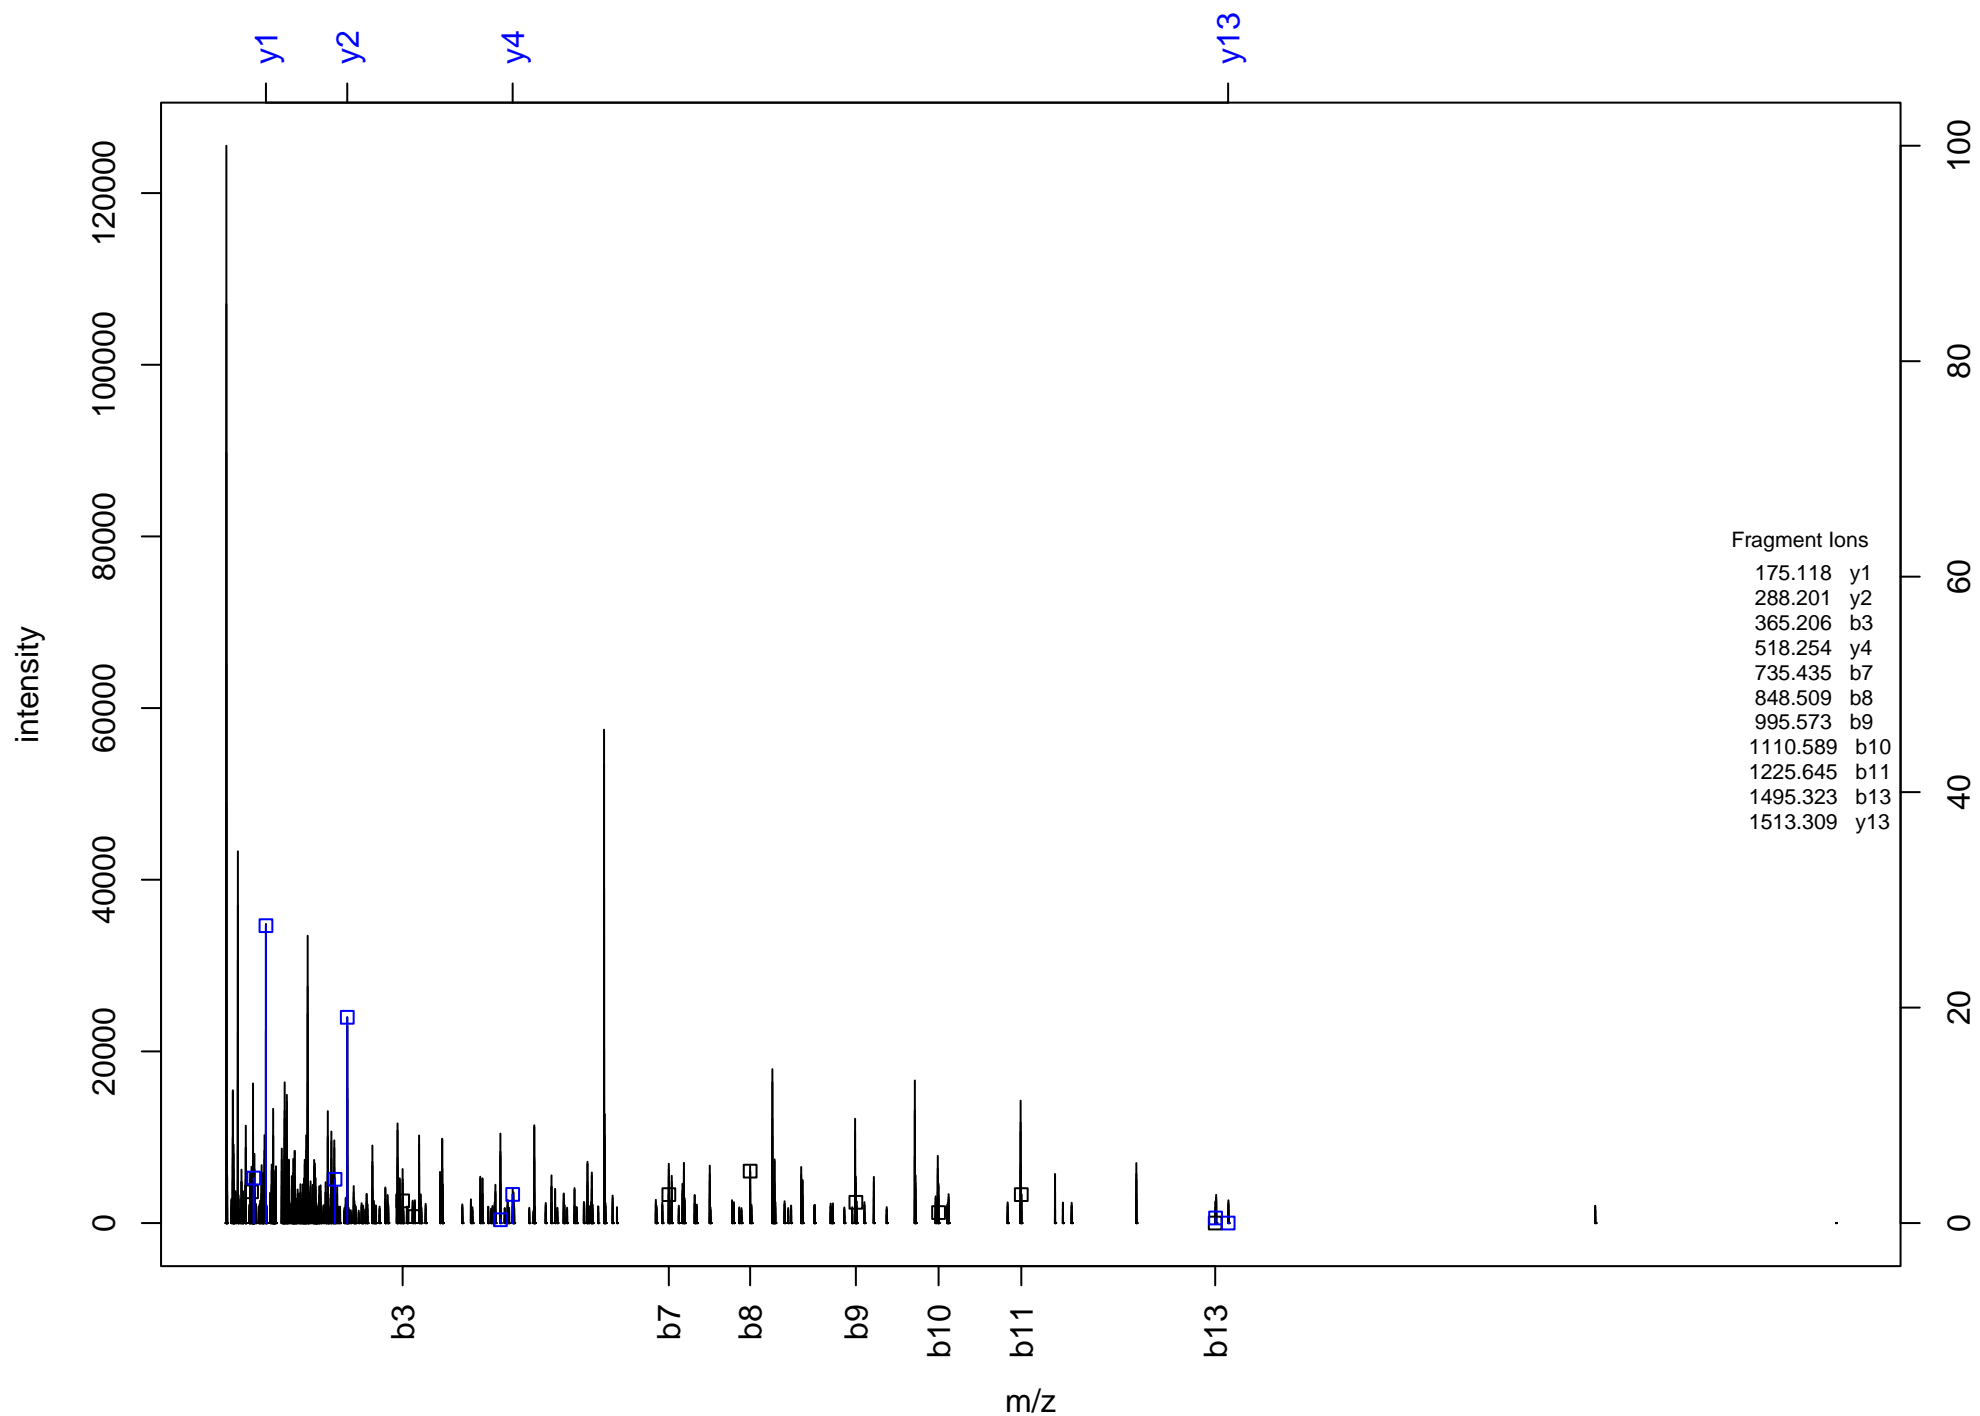

# IDELSLYSVPEGQSK

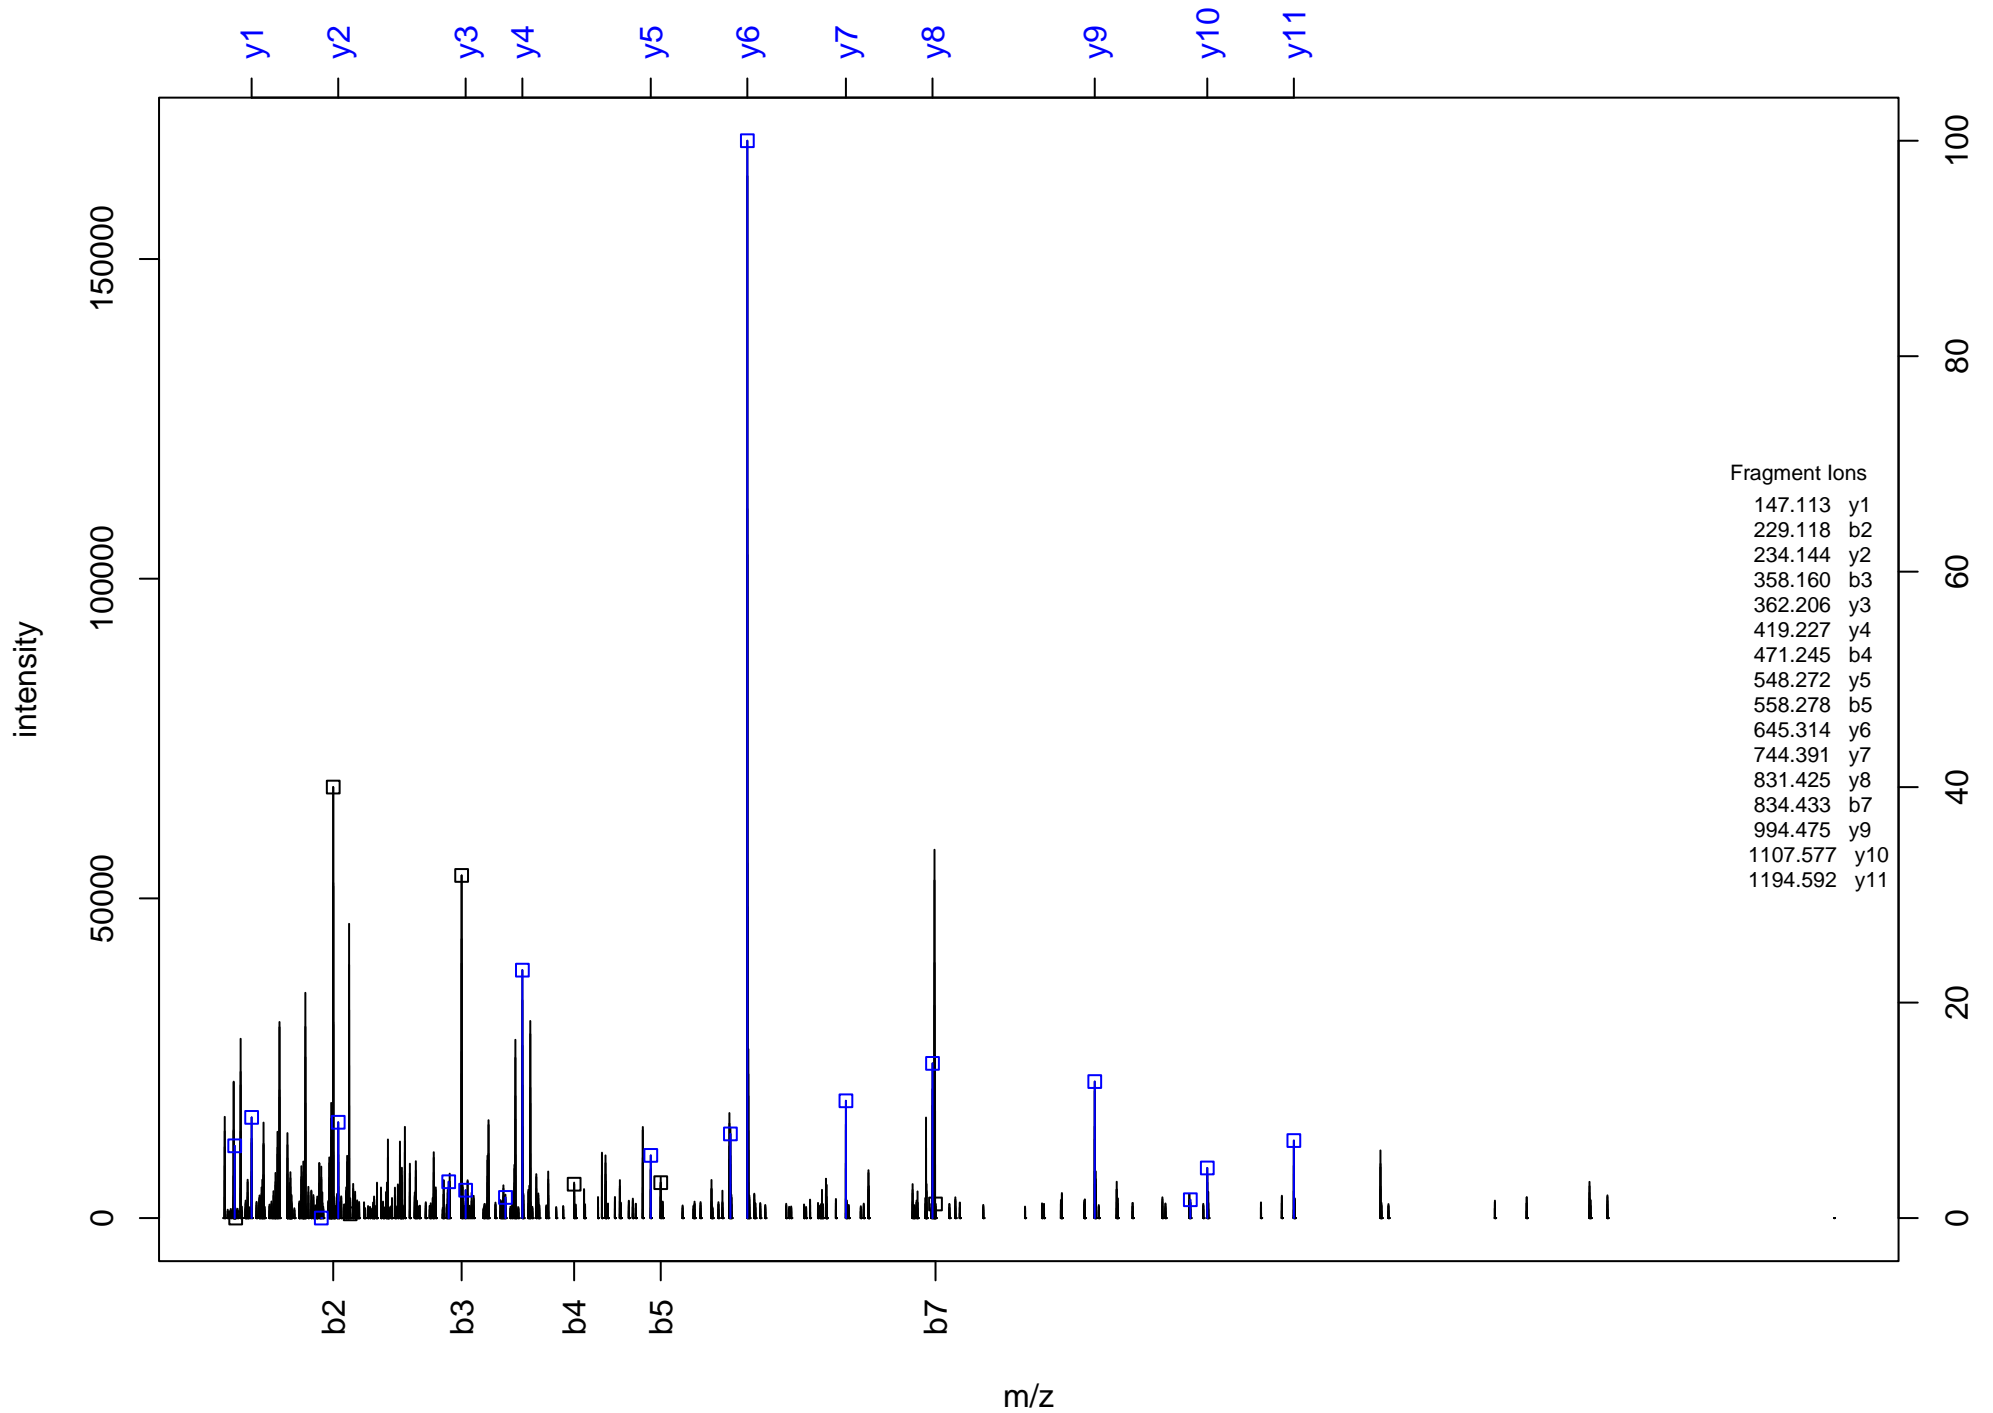

# Q^KNRRTMN^LQ^DIR

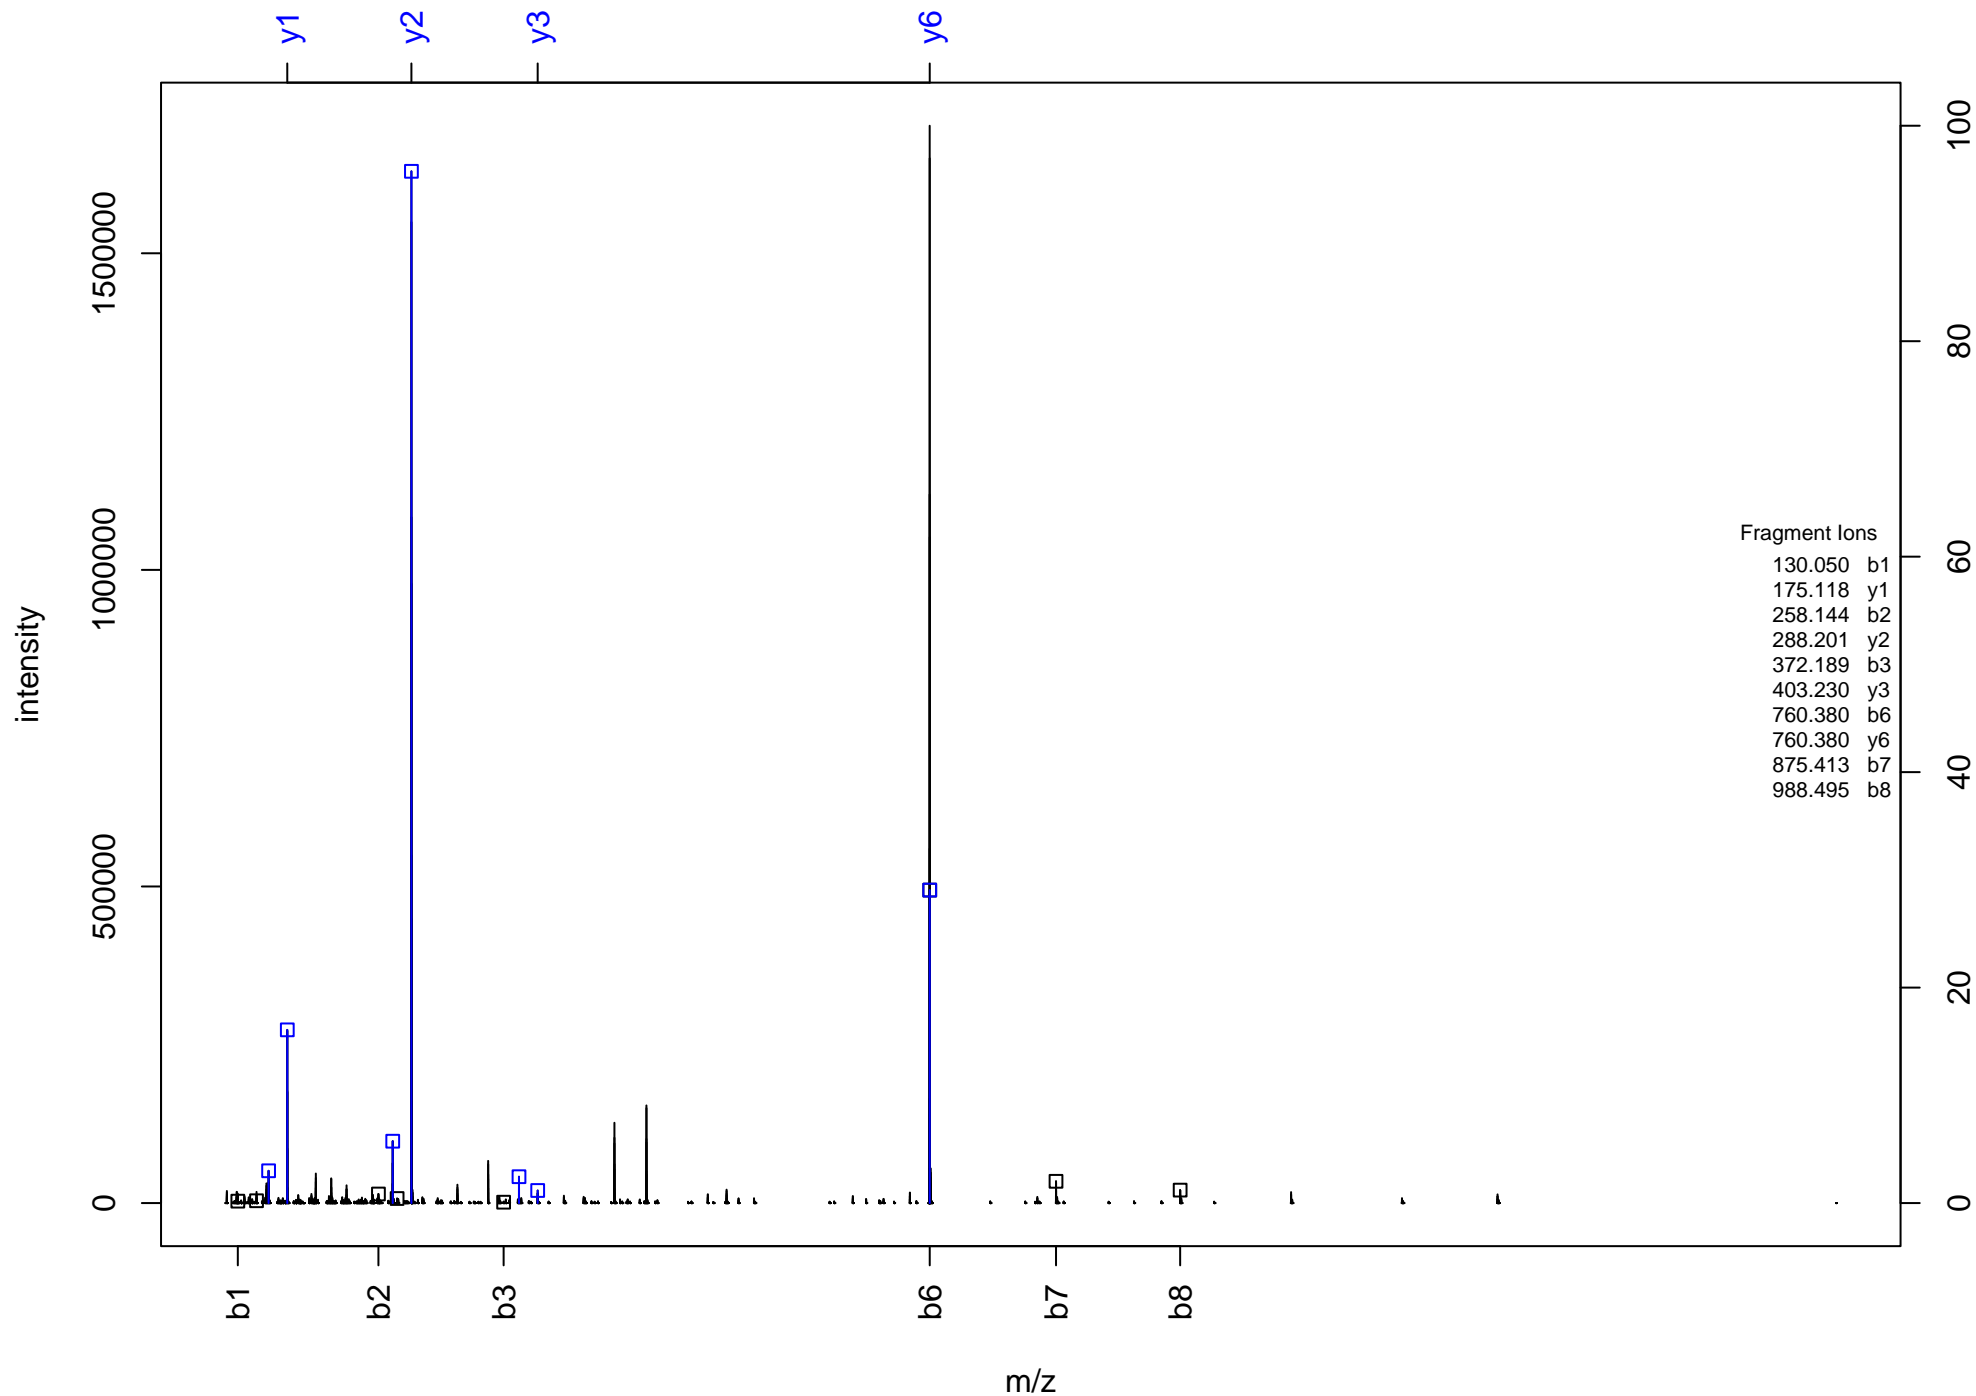

# NDAVDFSPTLPVTCGK

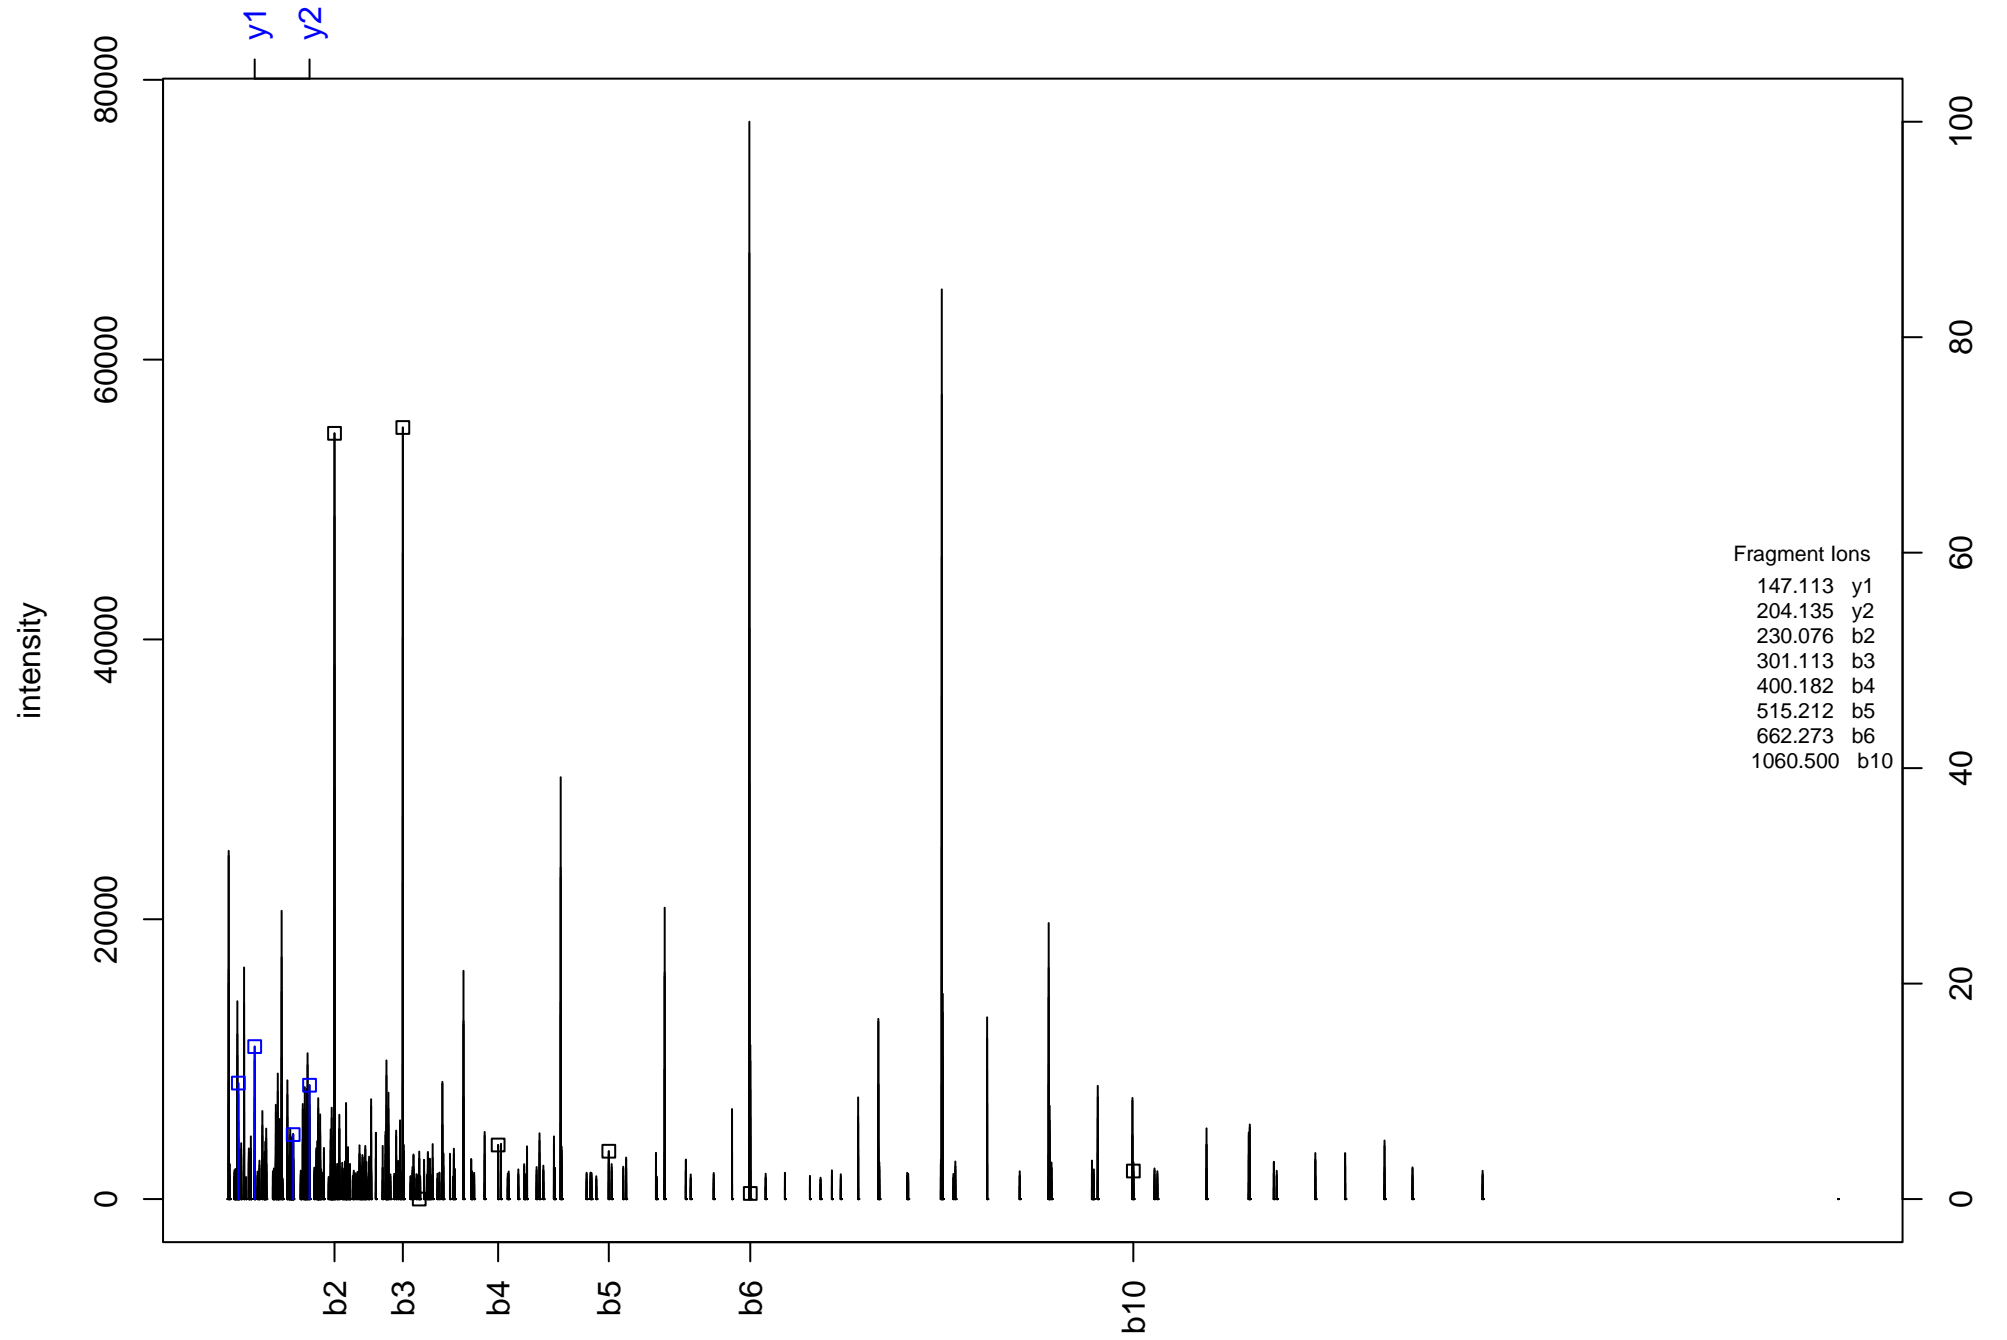

Fragment Ions

|          |     |
|----------|-----|
| 147.113  | y1  |
| 204.135  | y2  |
| 230.076  | b2  |
| 301.113  | b3  |
| 400.182  | b4  |
| 515.212  | b5  |
| 662.273  | b6  |
| 1060.500 | b10 |

# (Ac)MDDTLFQLK

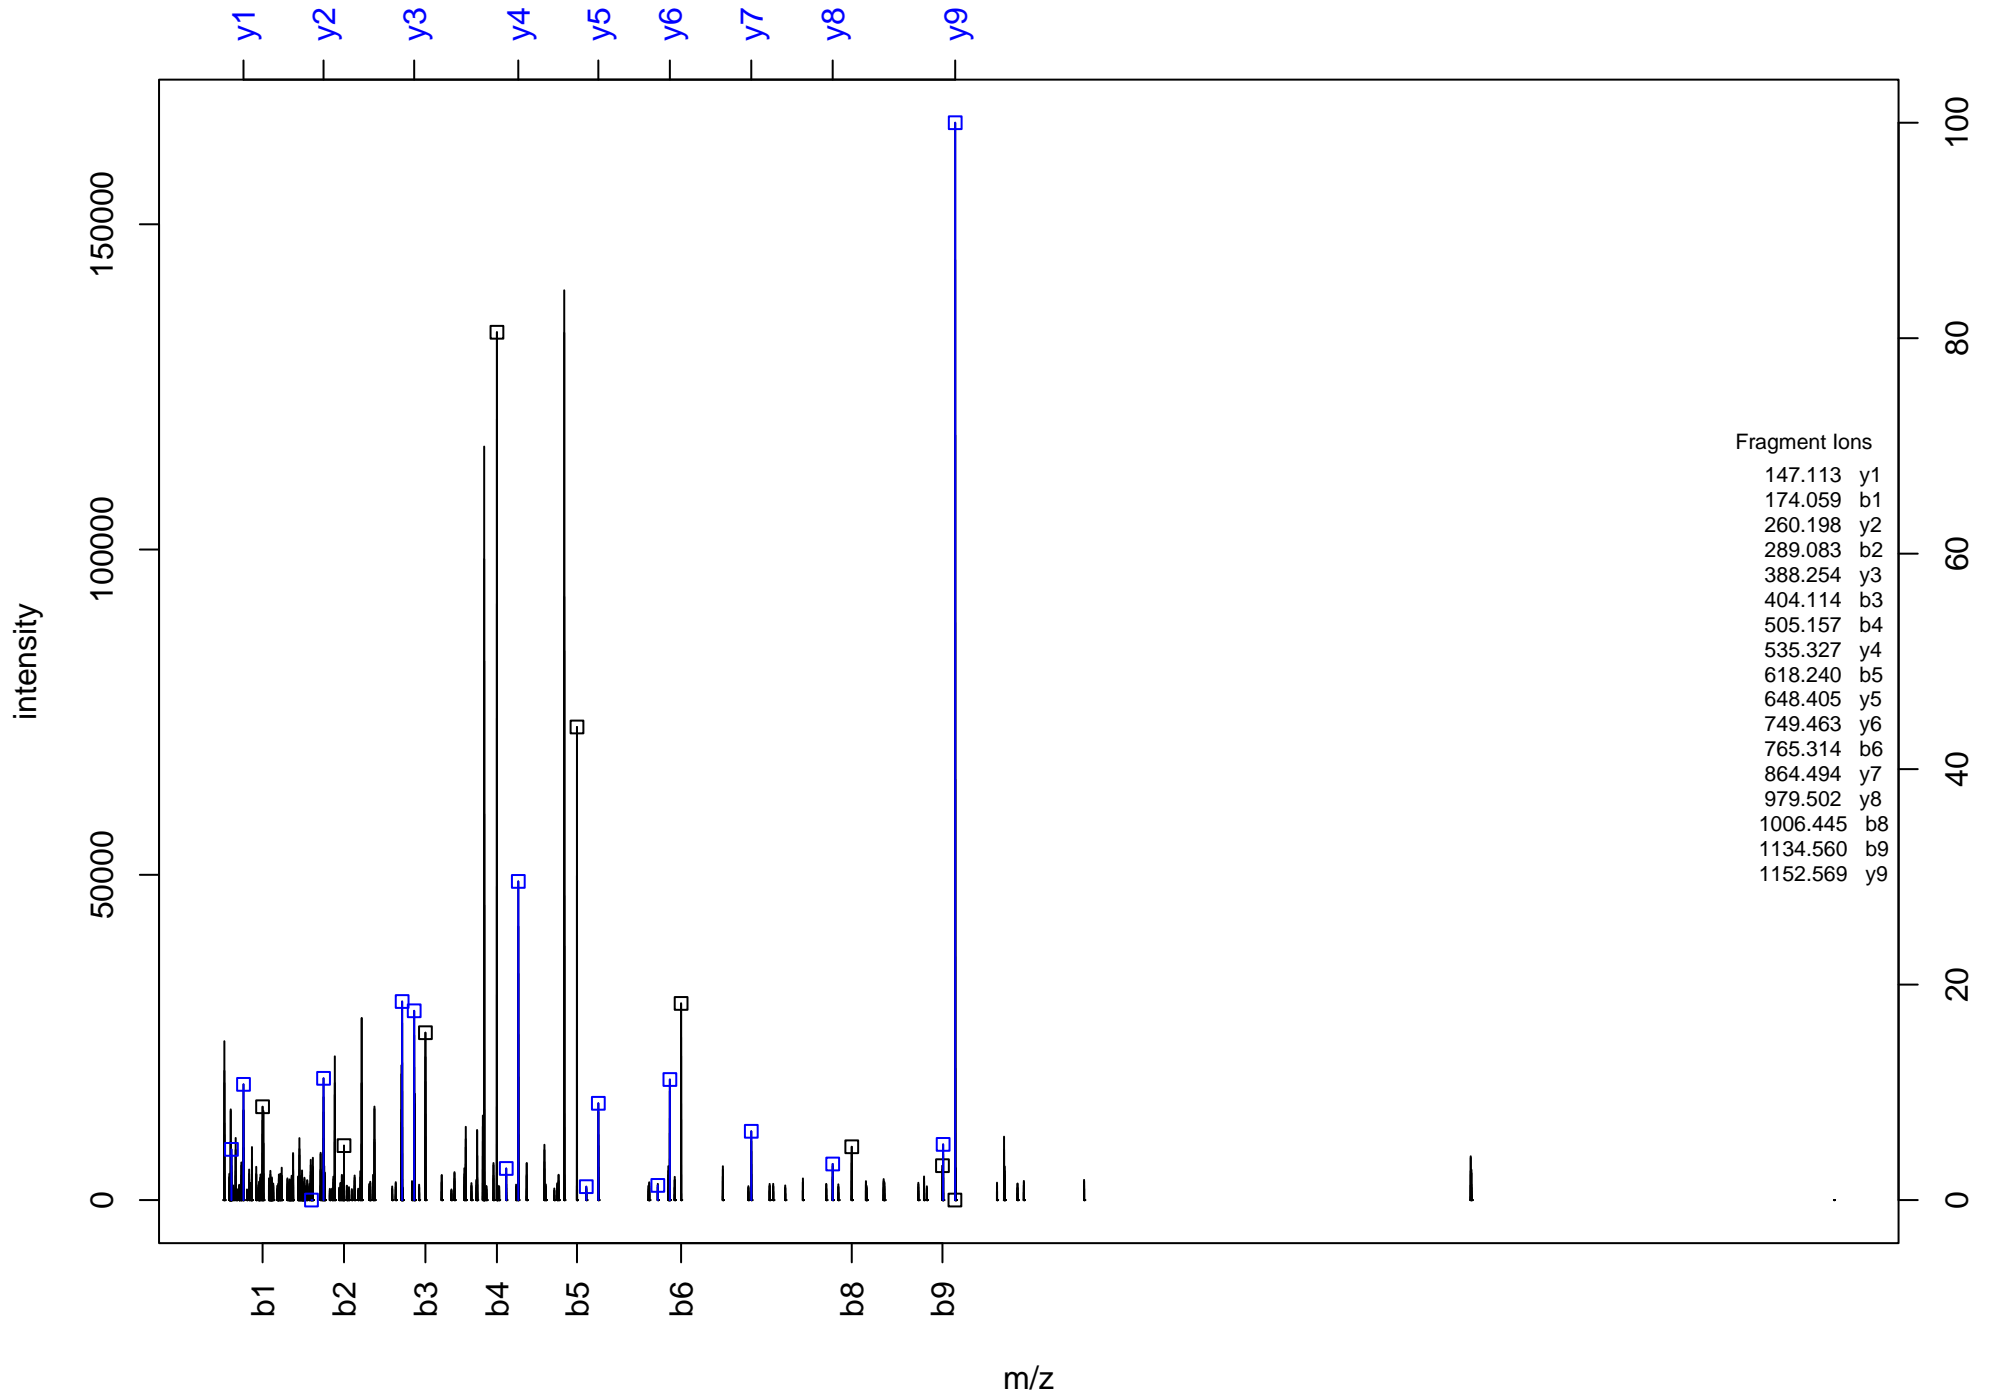

# NSEQIMEVGEELINDYASK

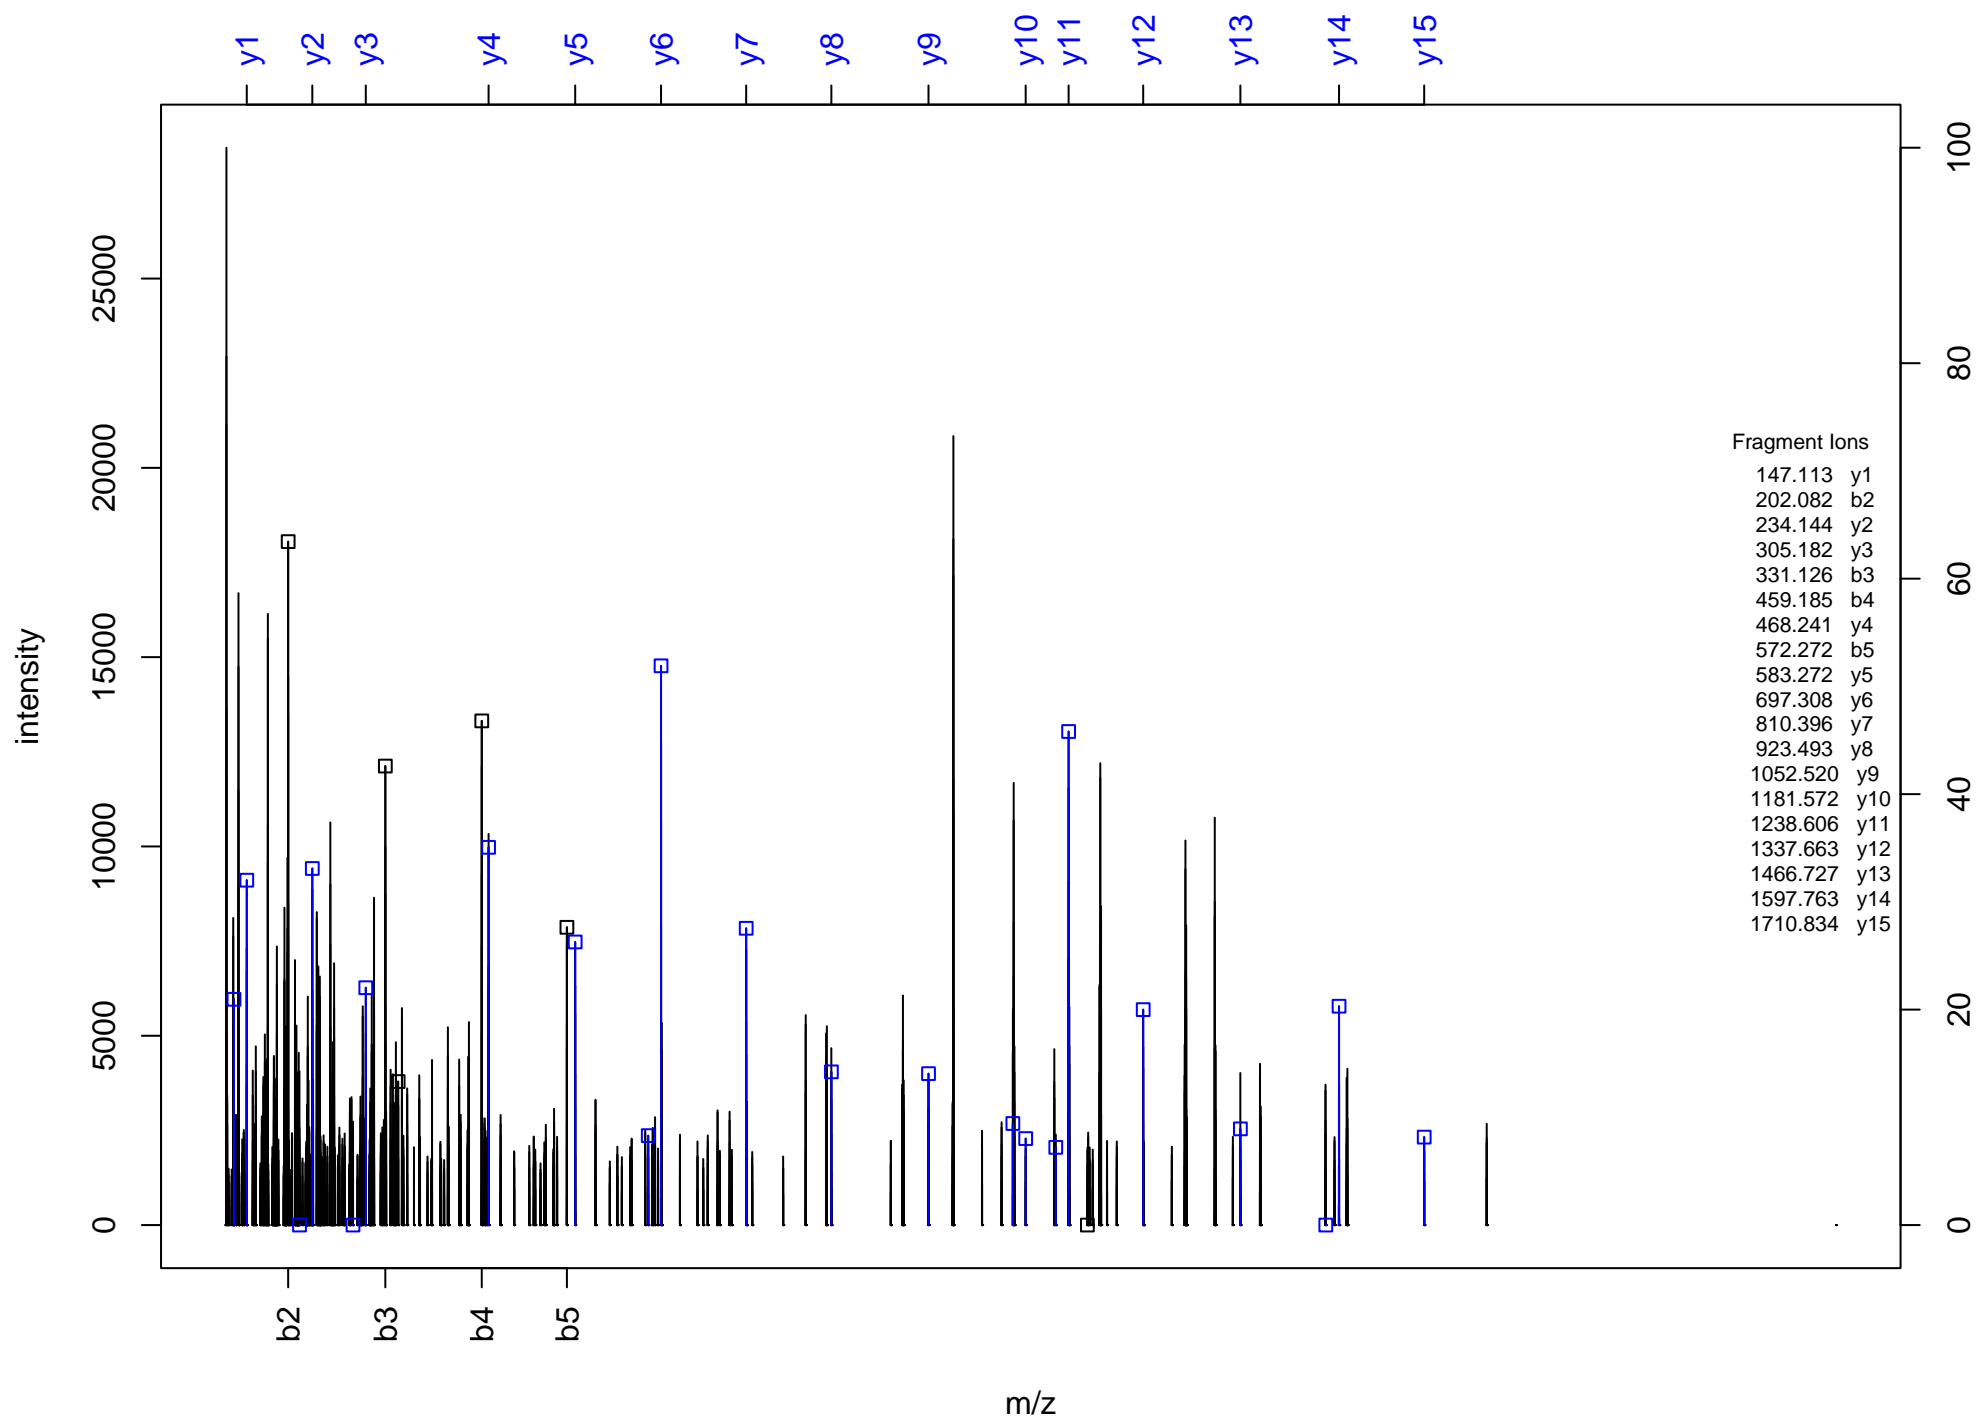

# IQ<sup>^</sup>EILHN<sup>^</sup>LEEIQ<sup>^</sup>EK

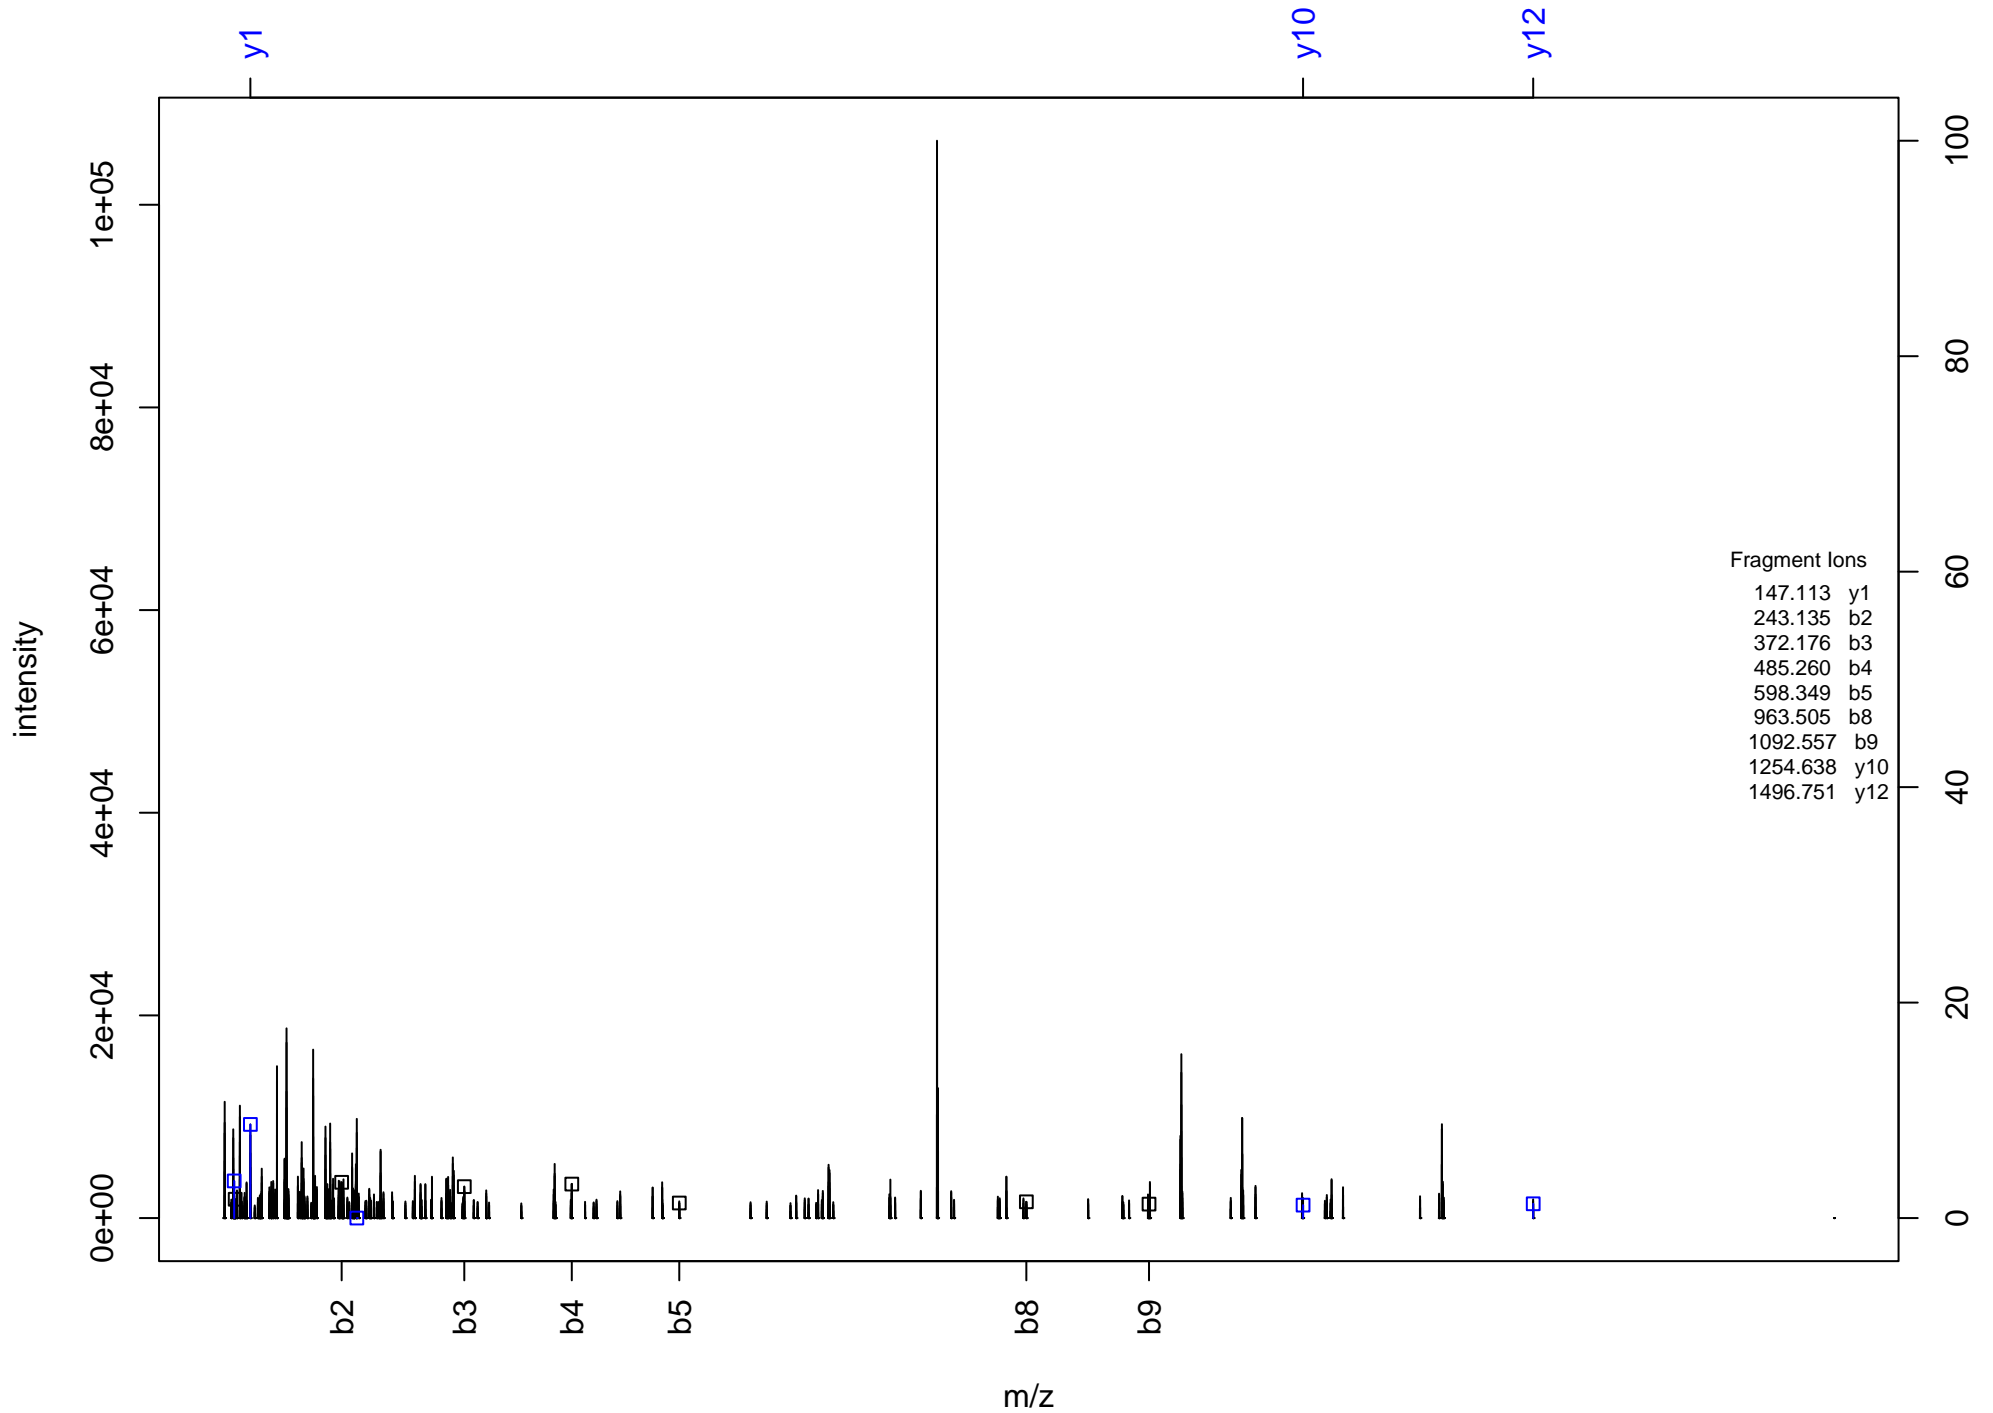

# (Ac)MLAASTRTRQ<sup>+</sup>INITCDN<sup>+</sup>PVDR

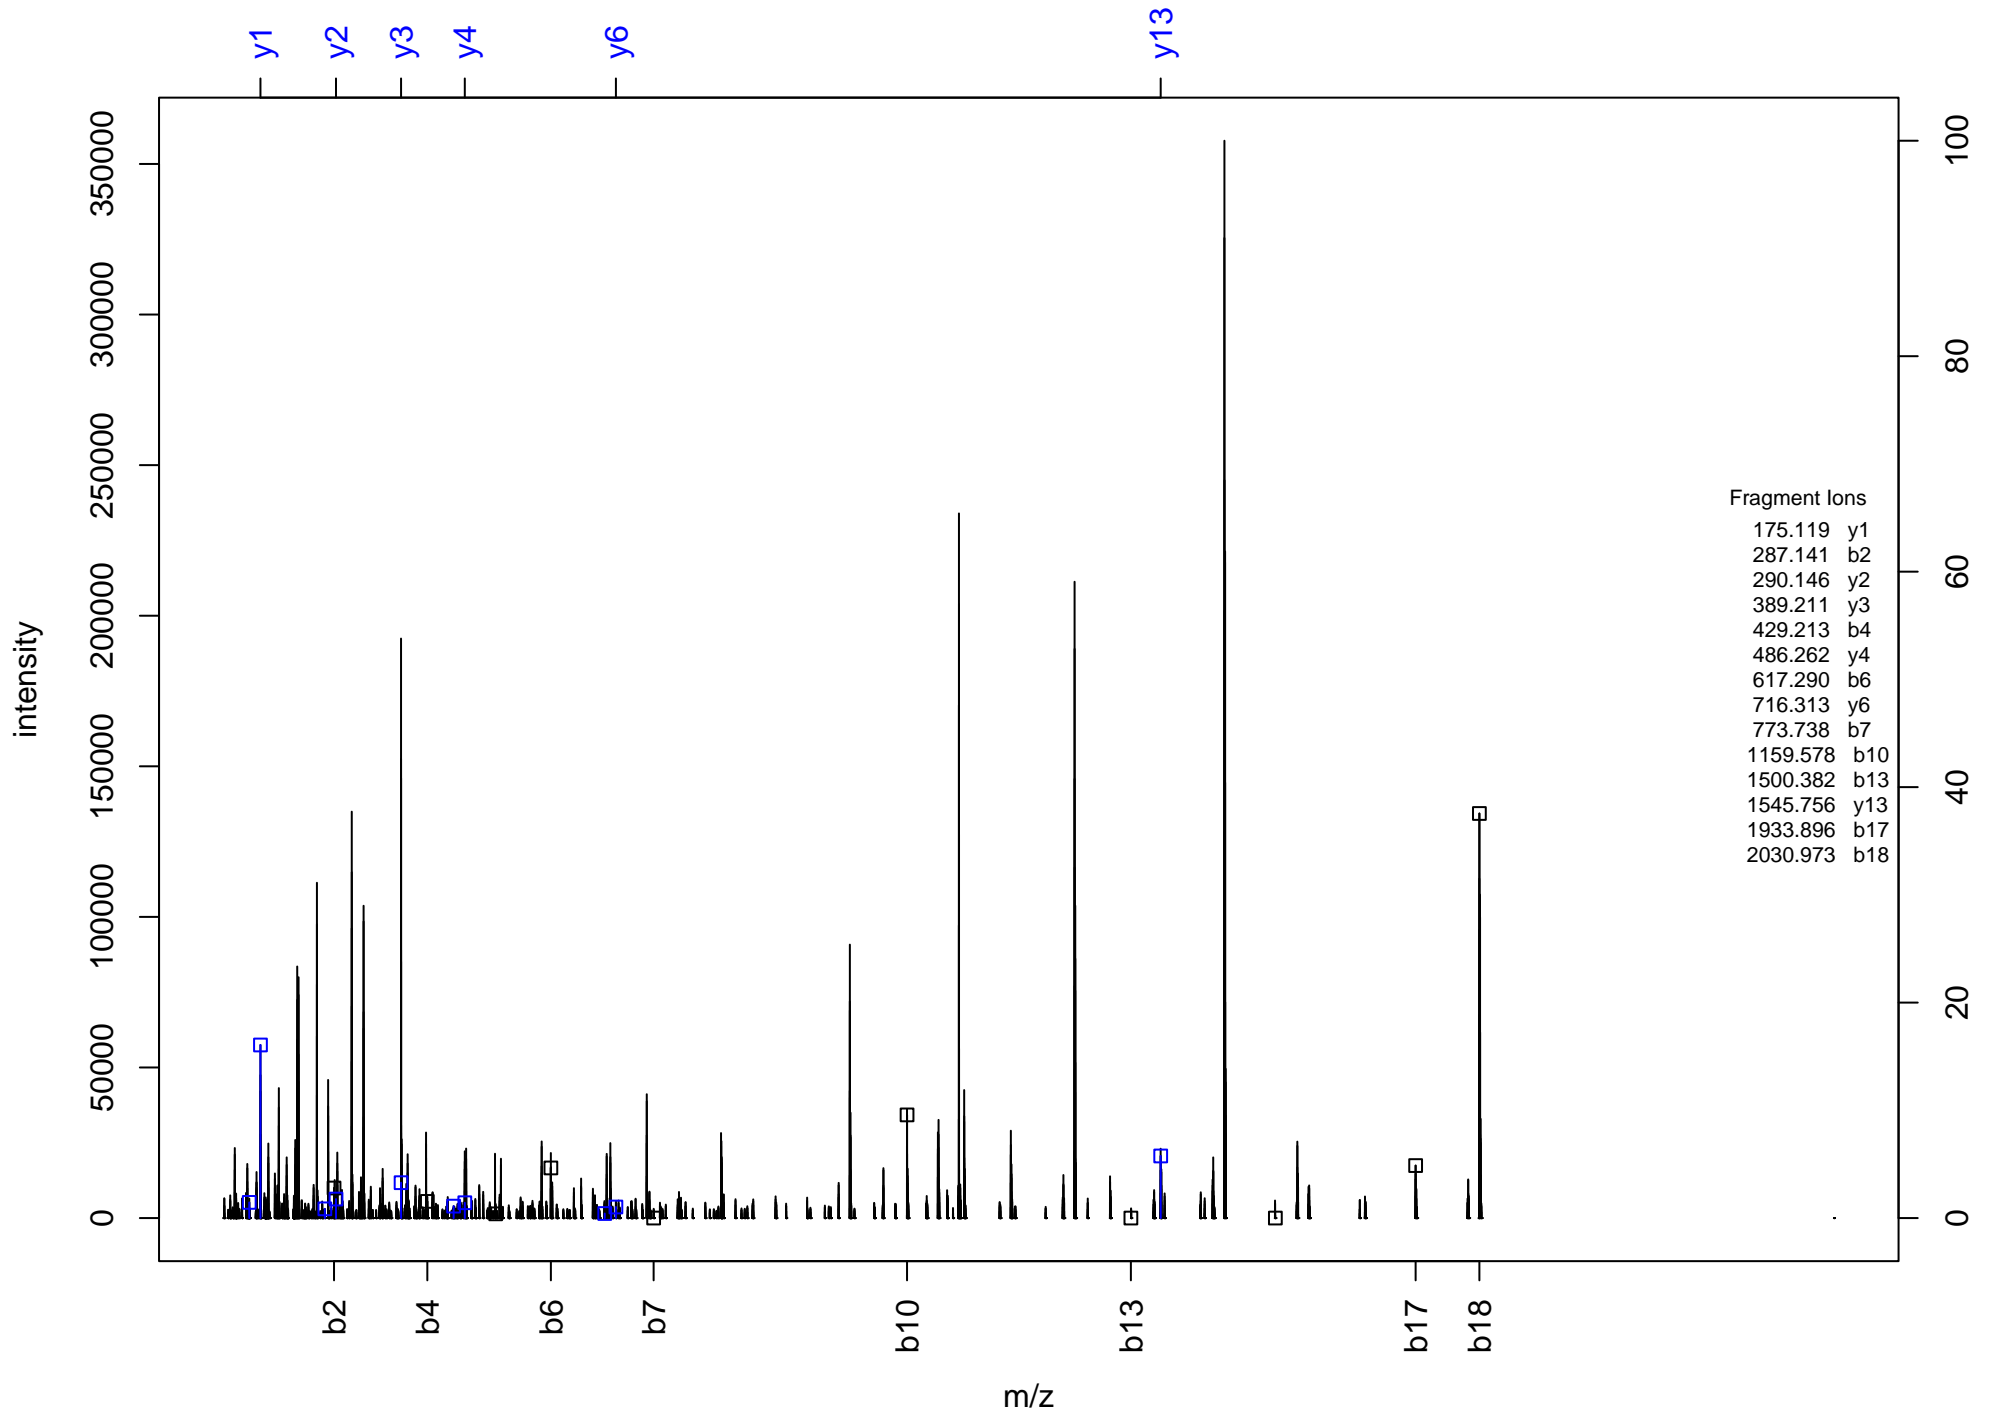



# AVAIDLPLGLGR

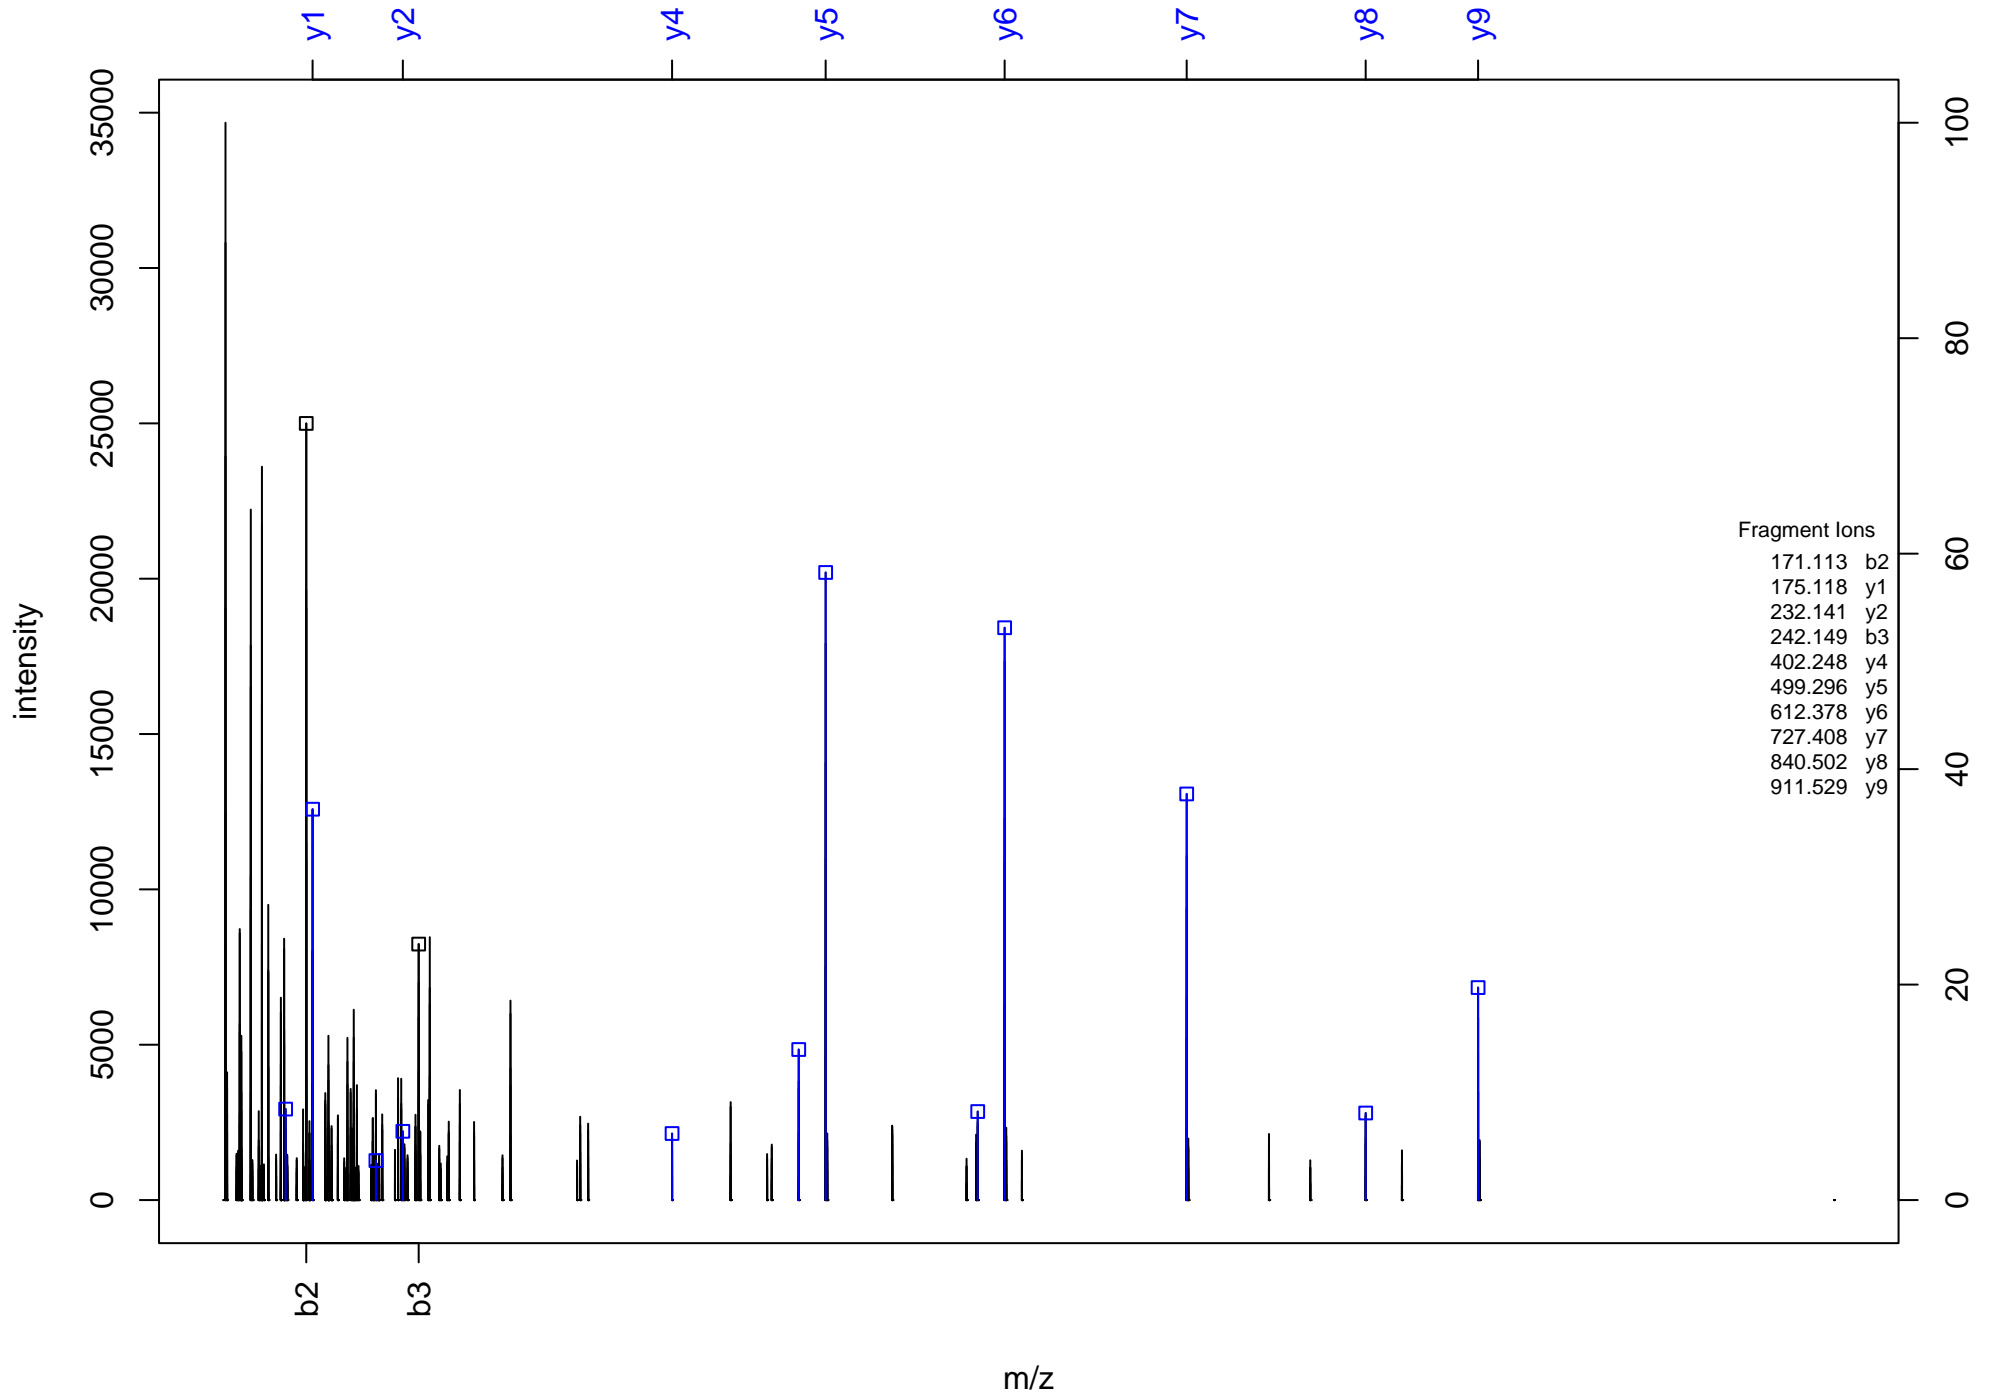

# GFLEKN<sup>N</sup>DLLYR

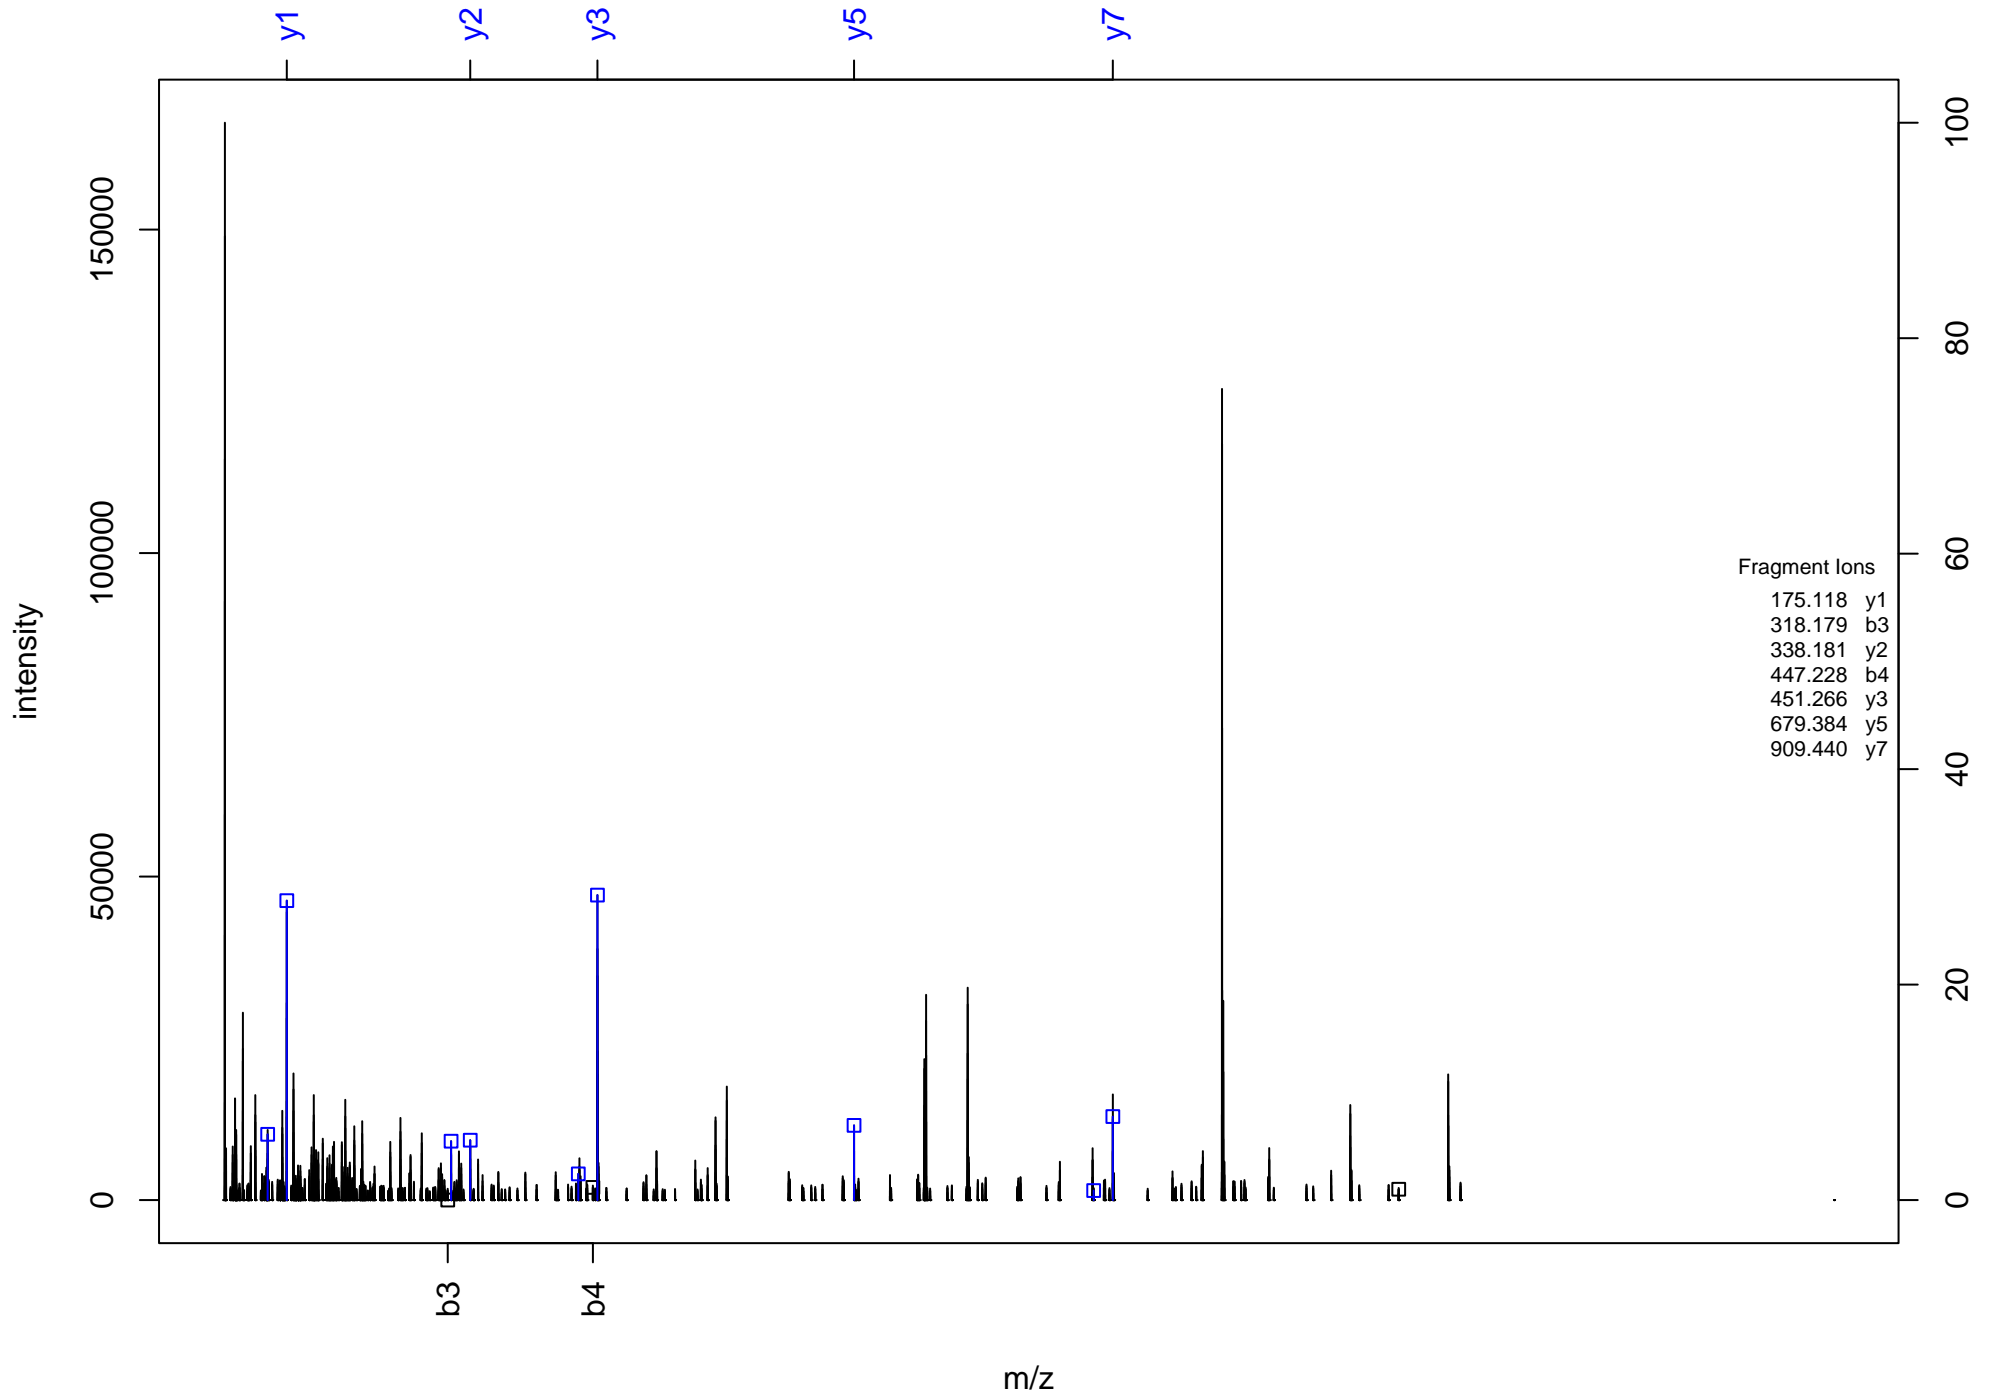

# SIPDTPVPTYQDPLYLEDQVPR

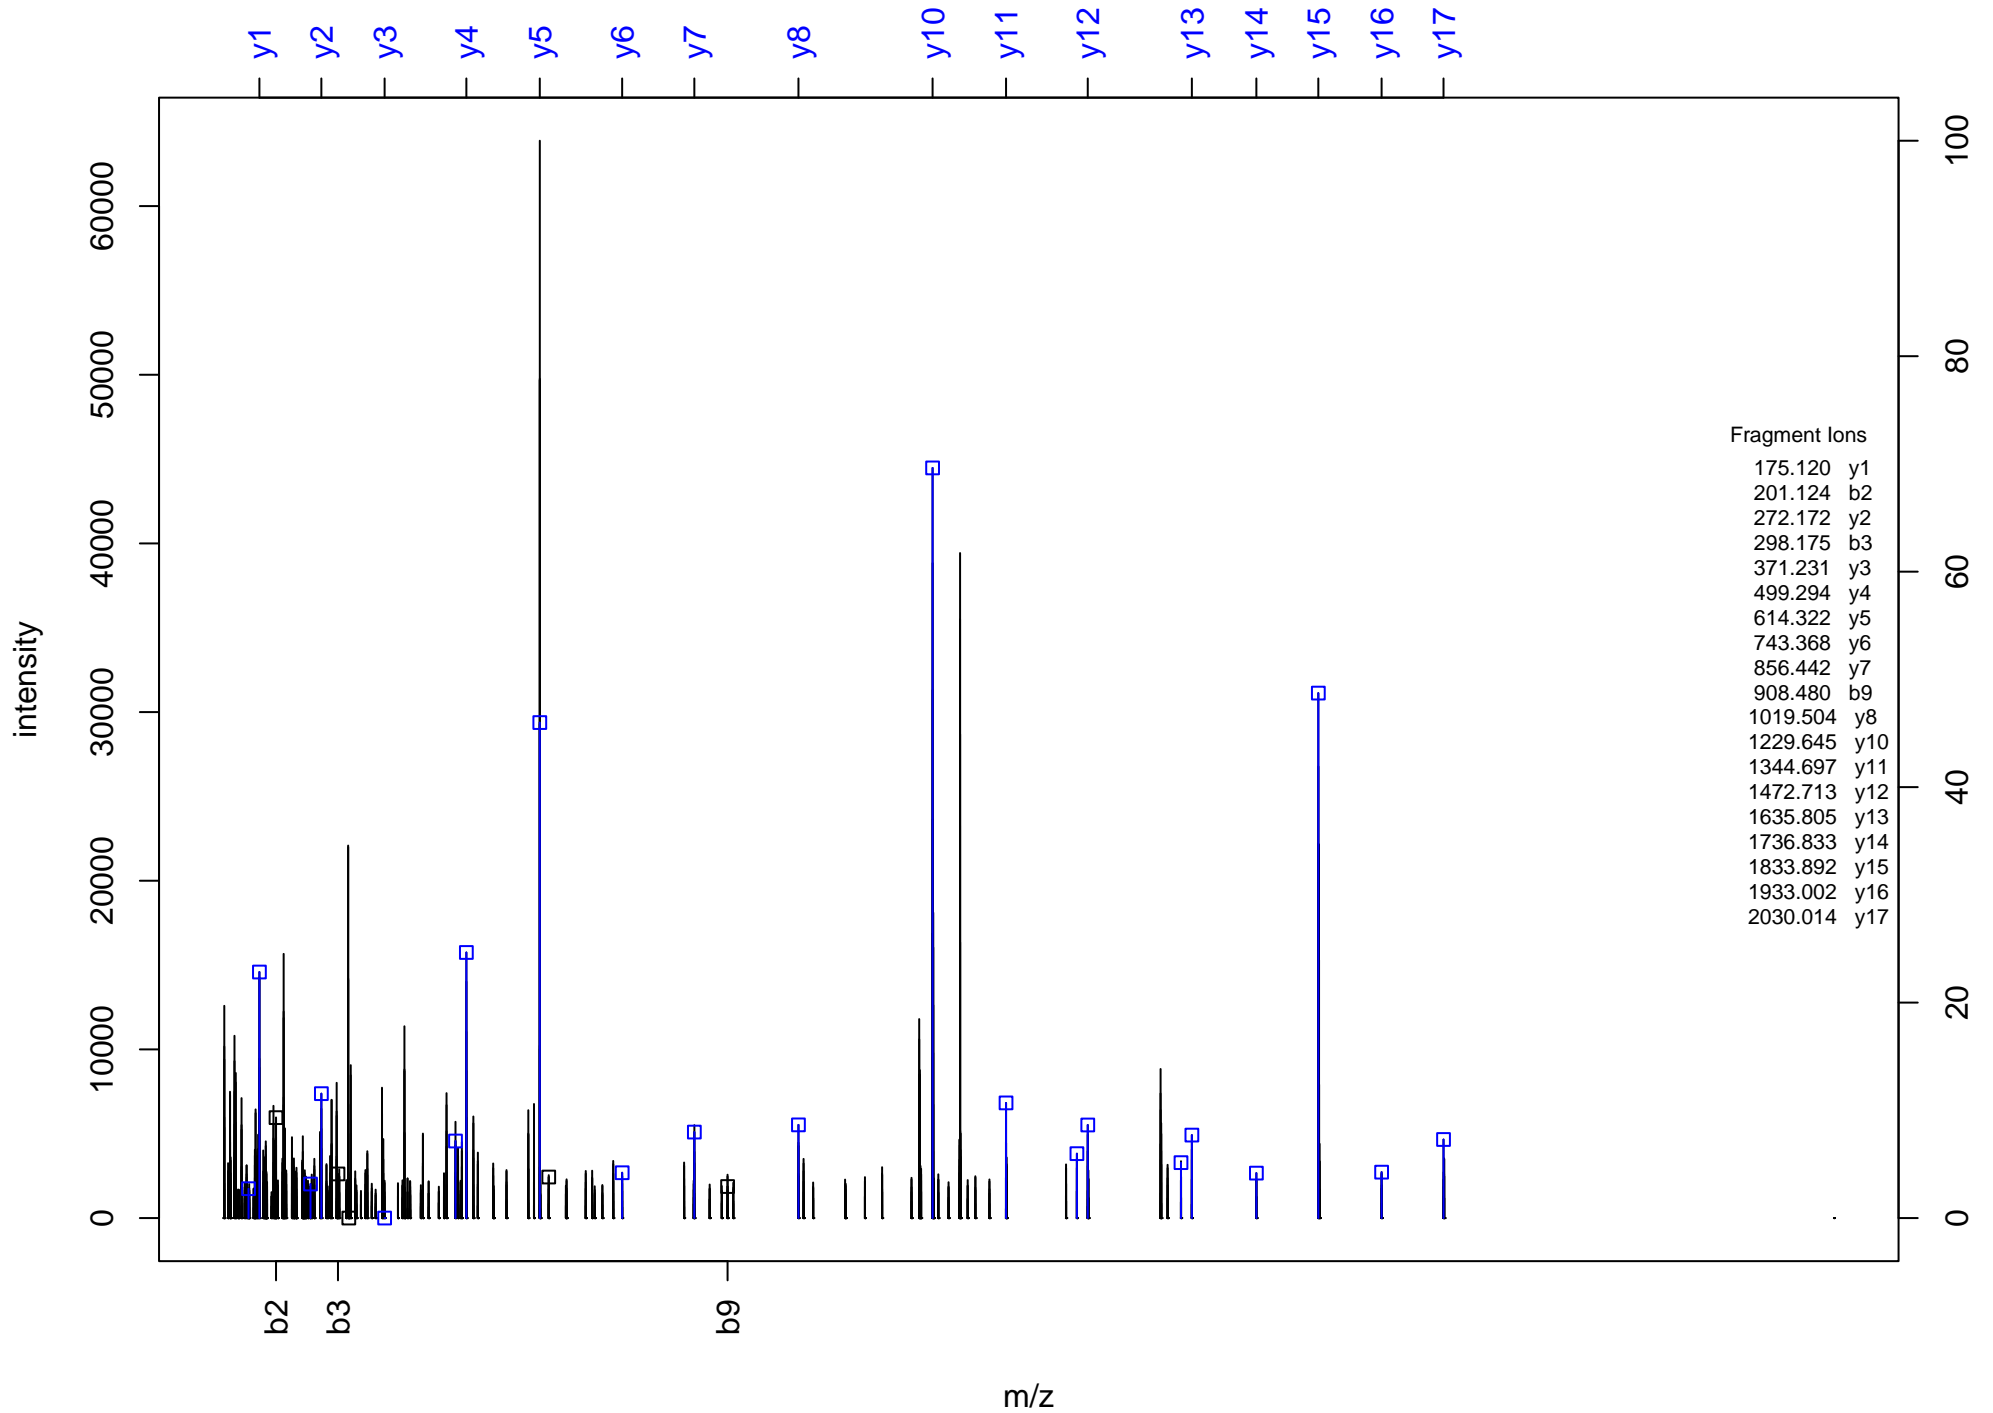

# M\*VLSLILQLSTLWPACR

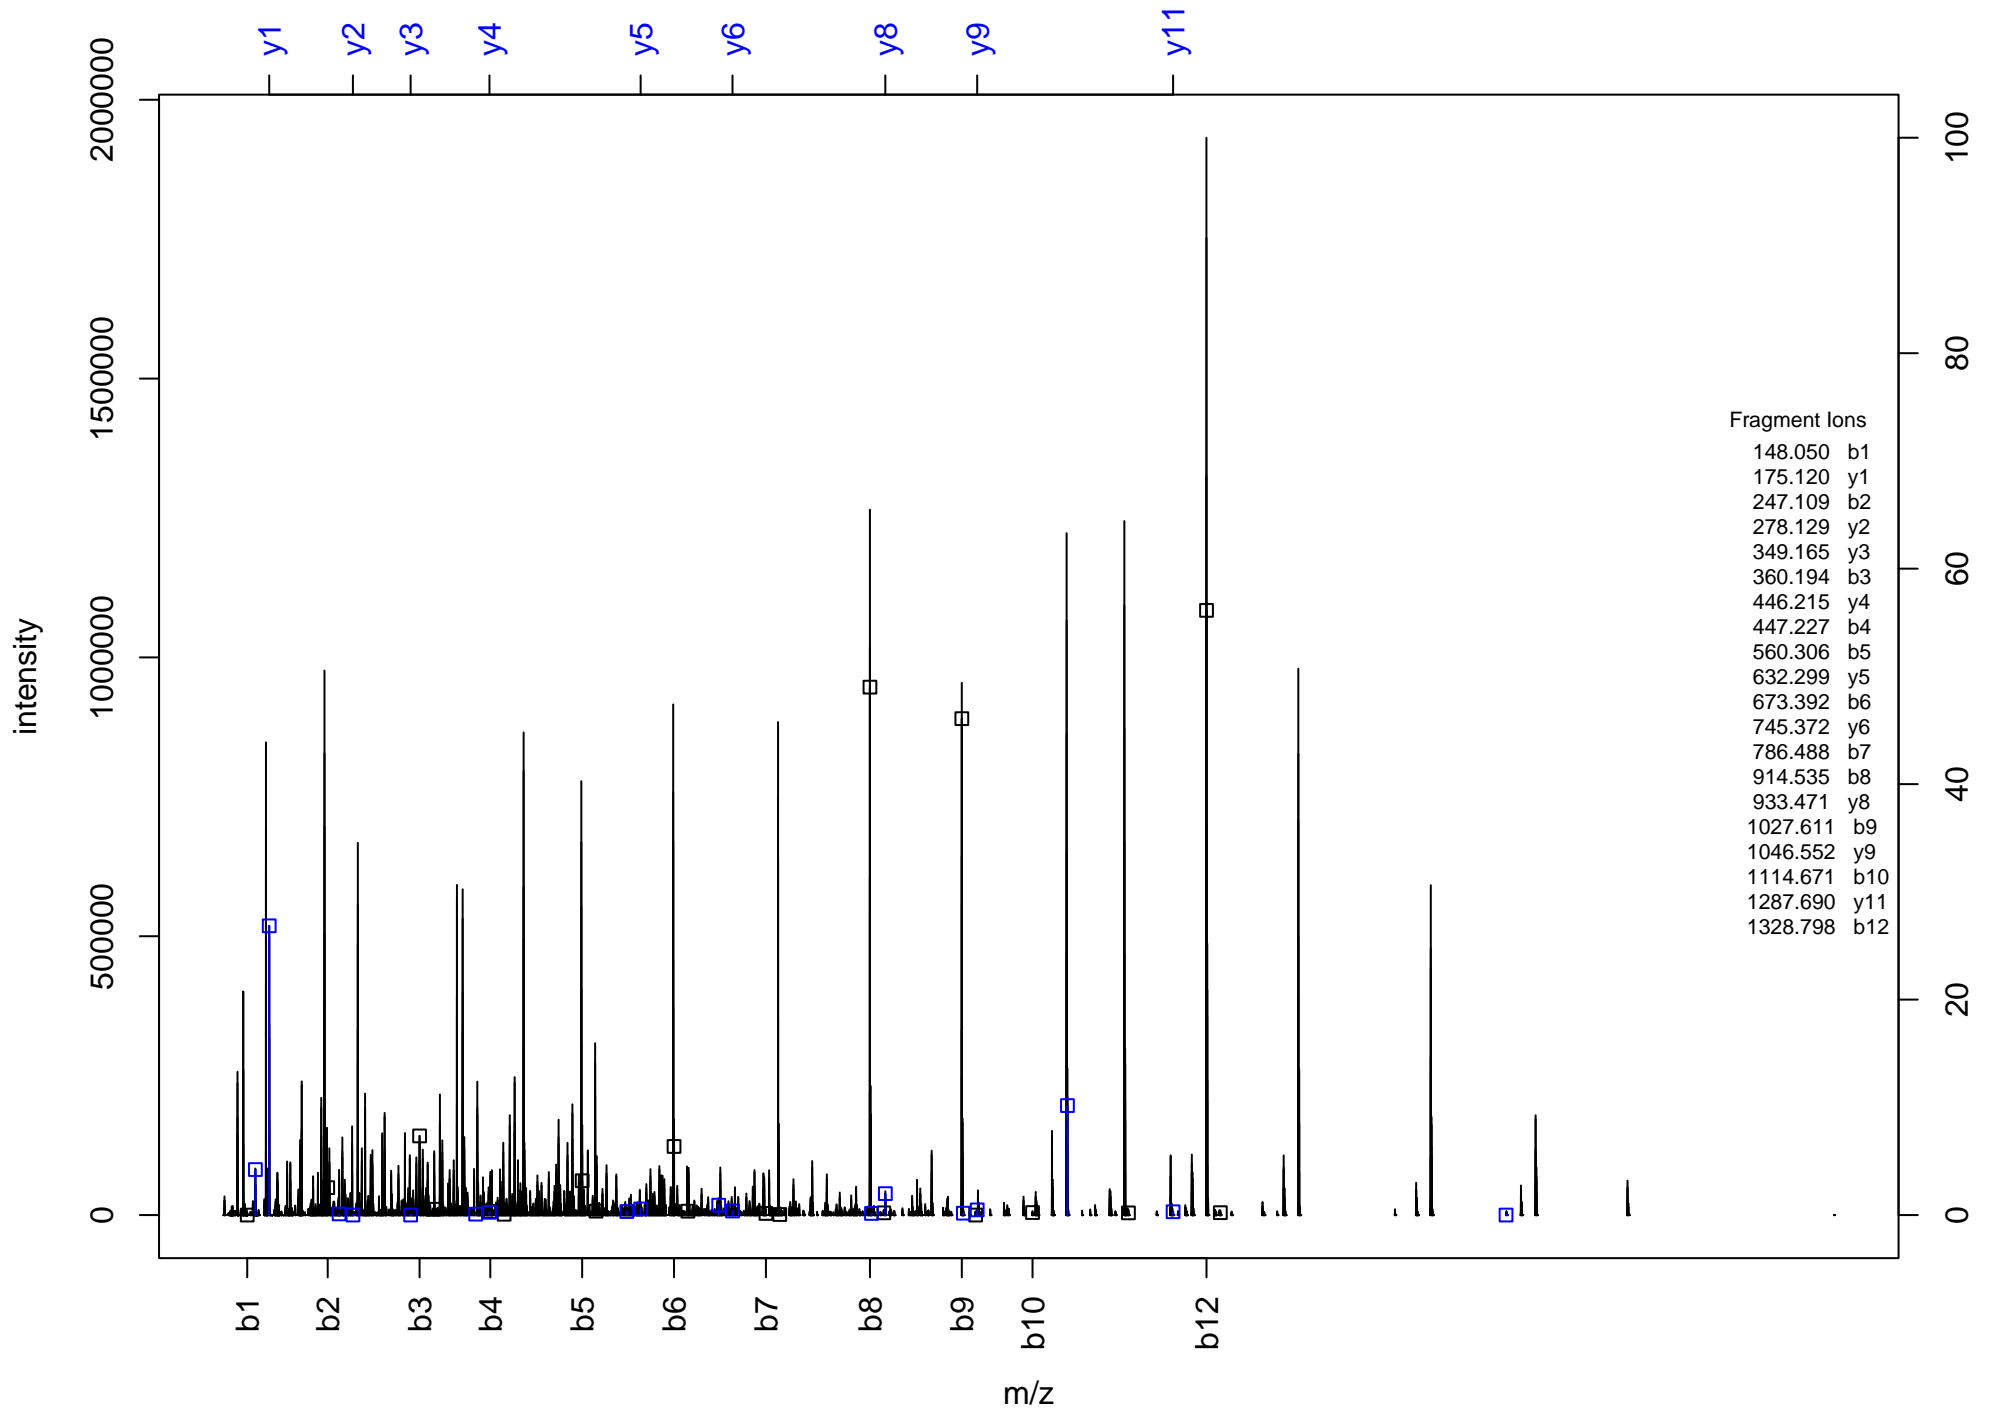

# TSAASPVPVPSAEQPRPIVEEELSK

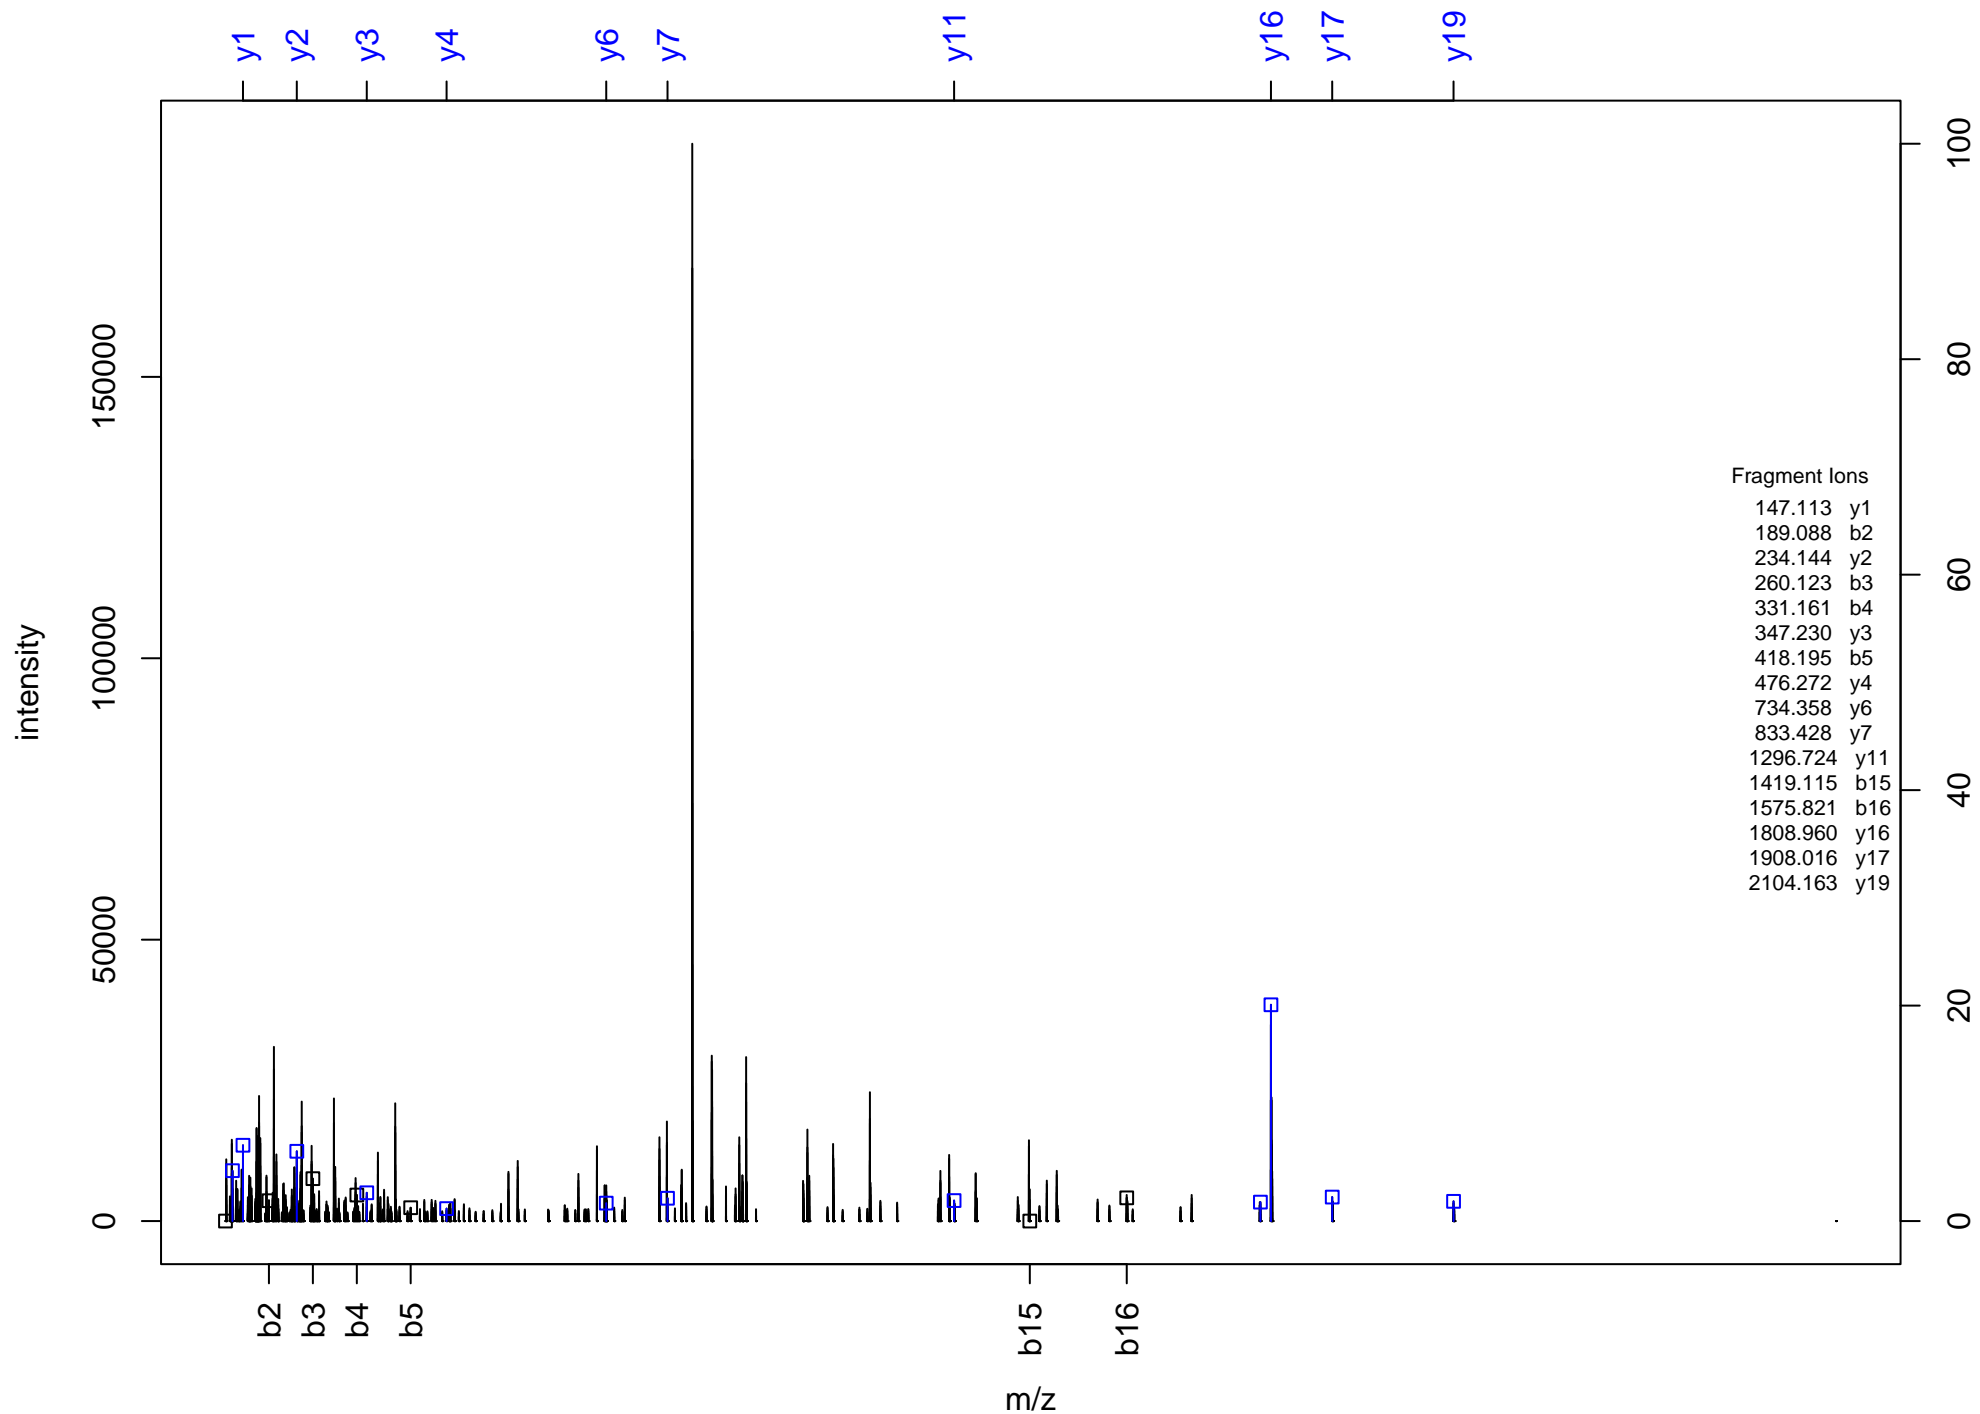

# SDIQMPFTCSVTYYGPSGQK

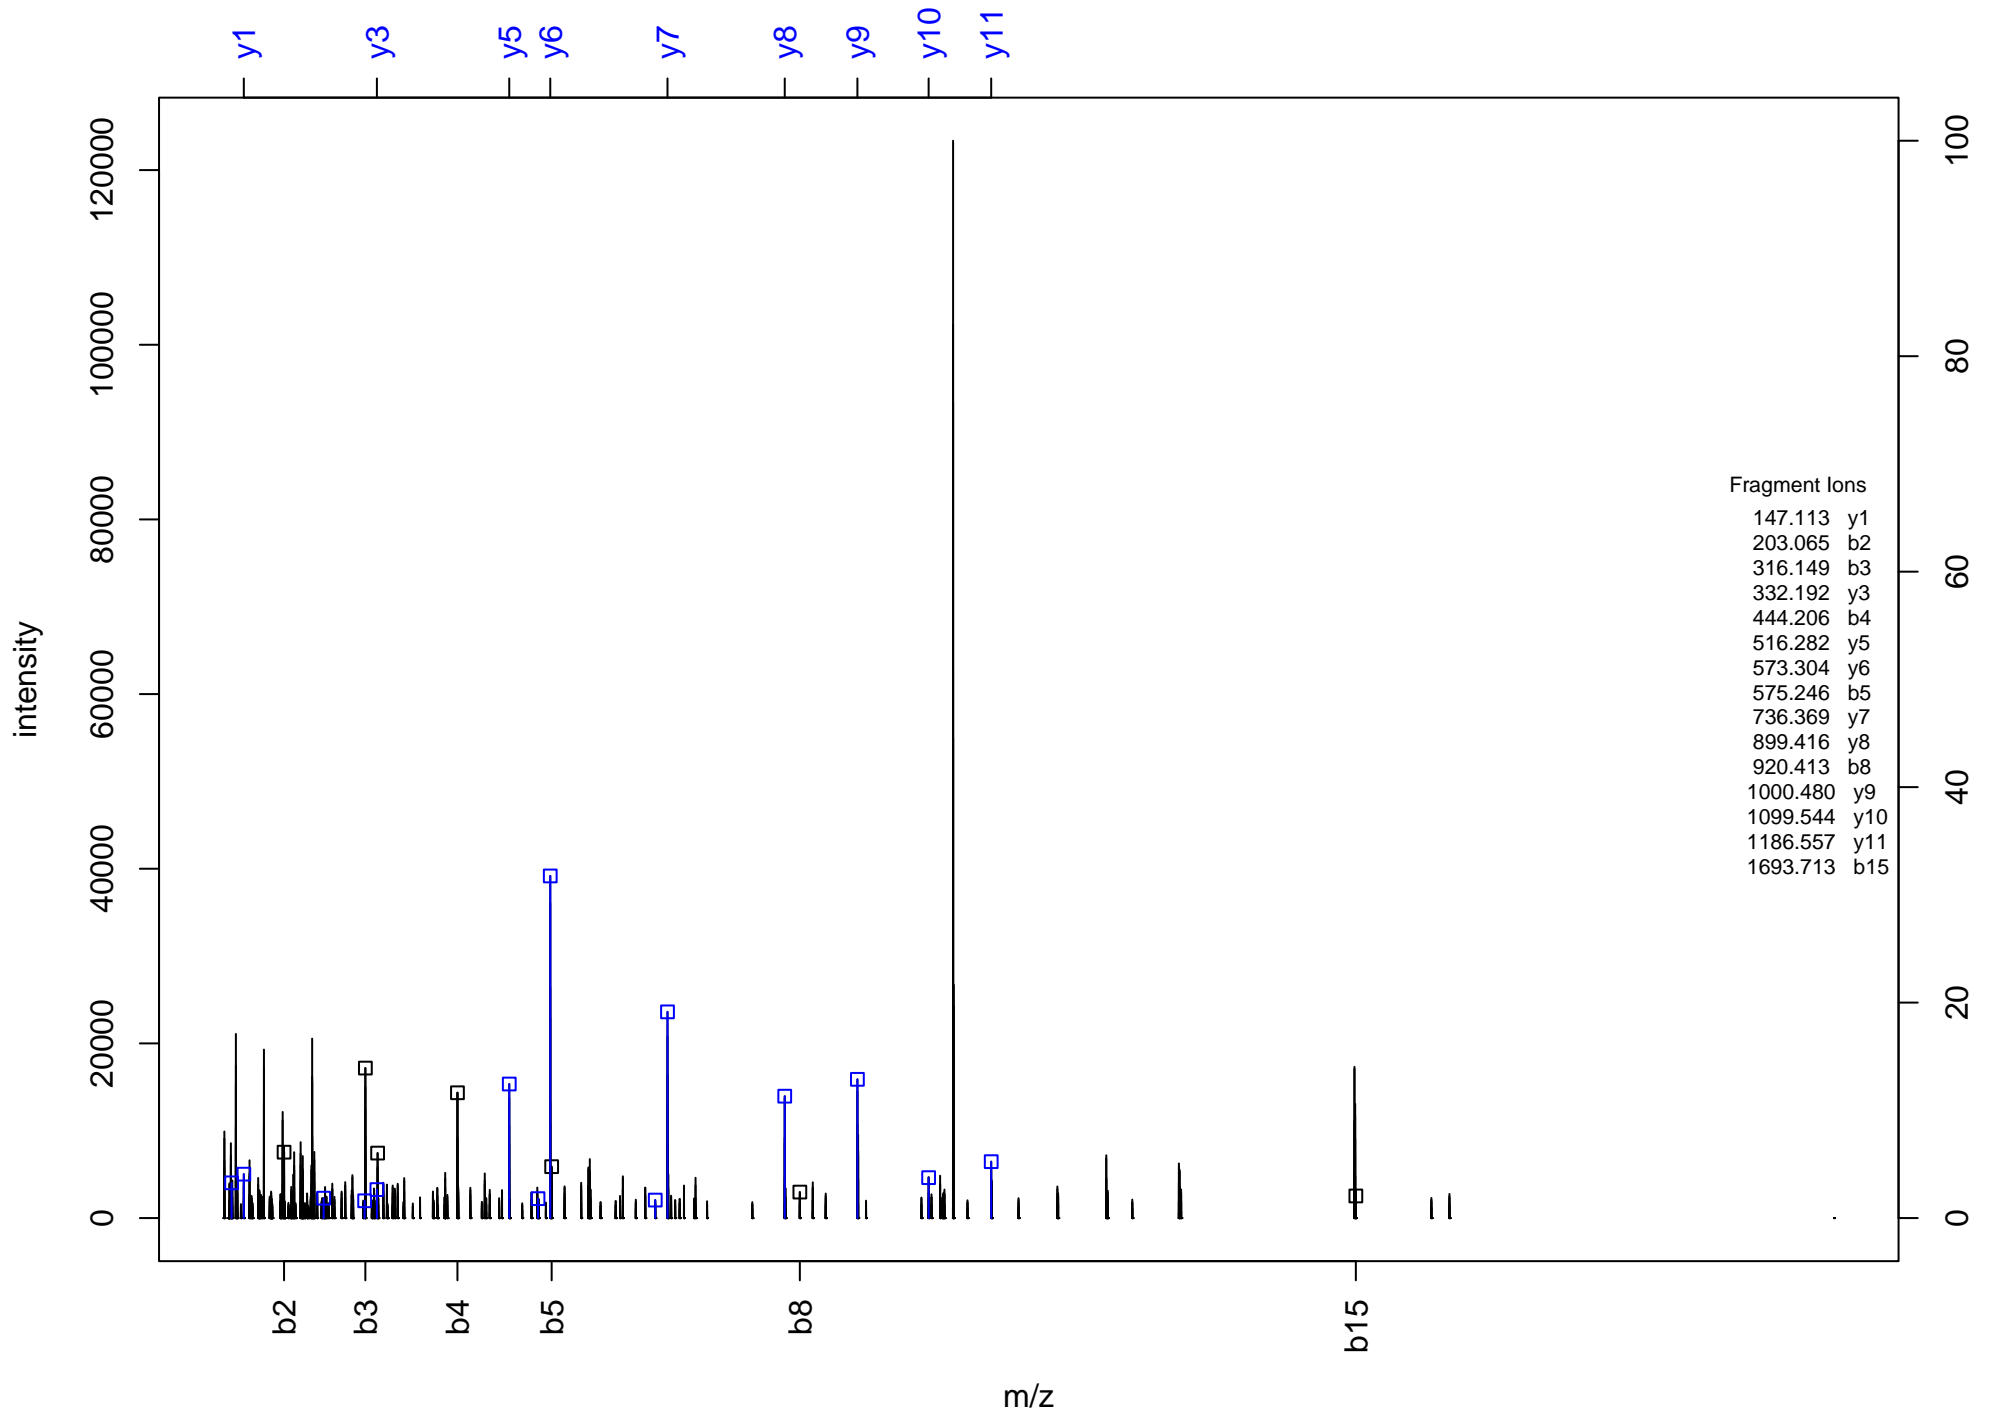

# VGQ<sup>+</sup>PMVSSSN<sup>+</sup>Q<sup>+</sup>R

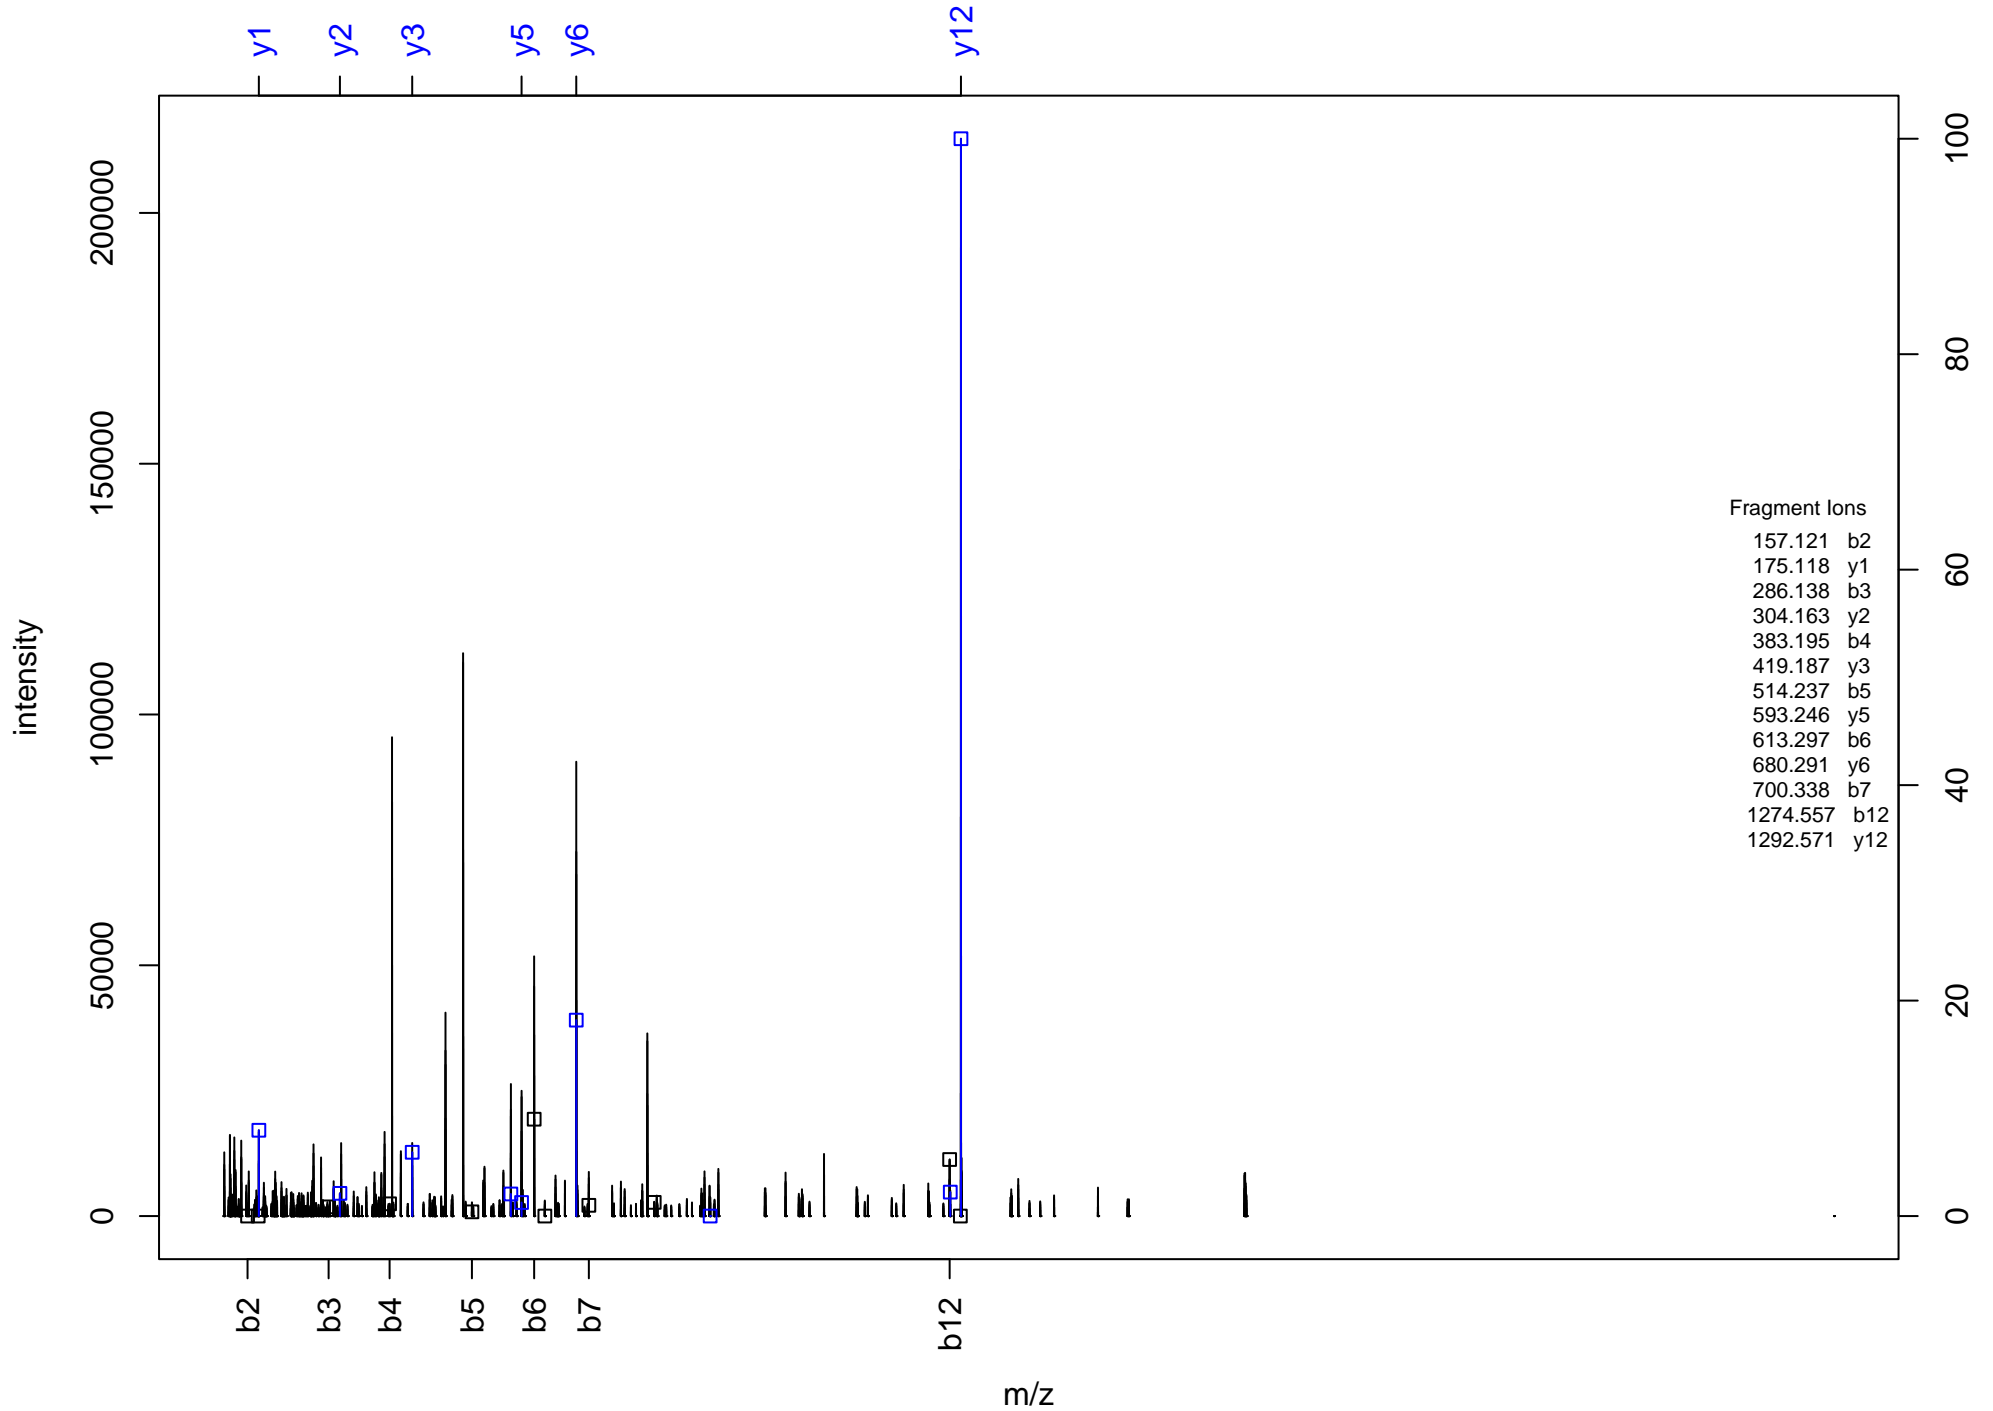

# MAADDVEEYMIERPEPEFQDLNEK

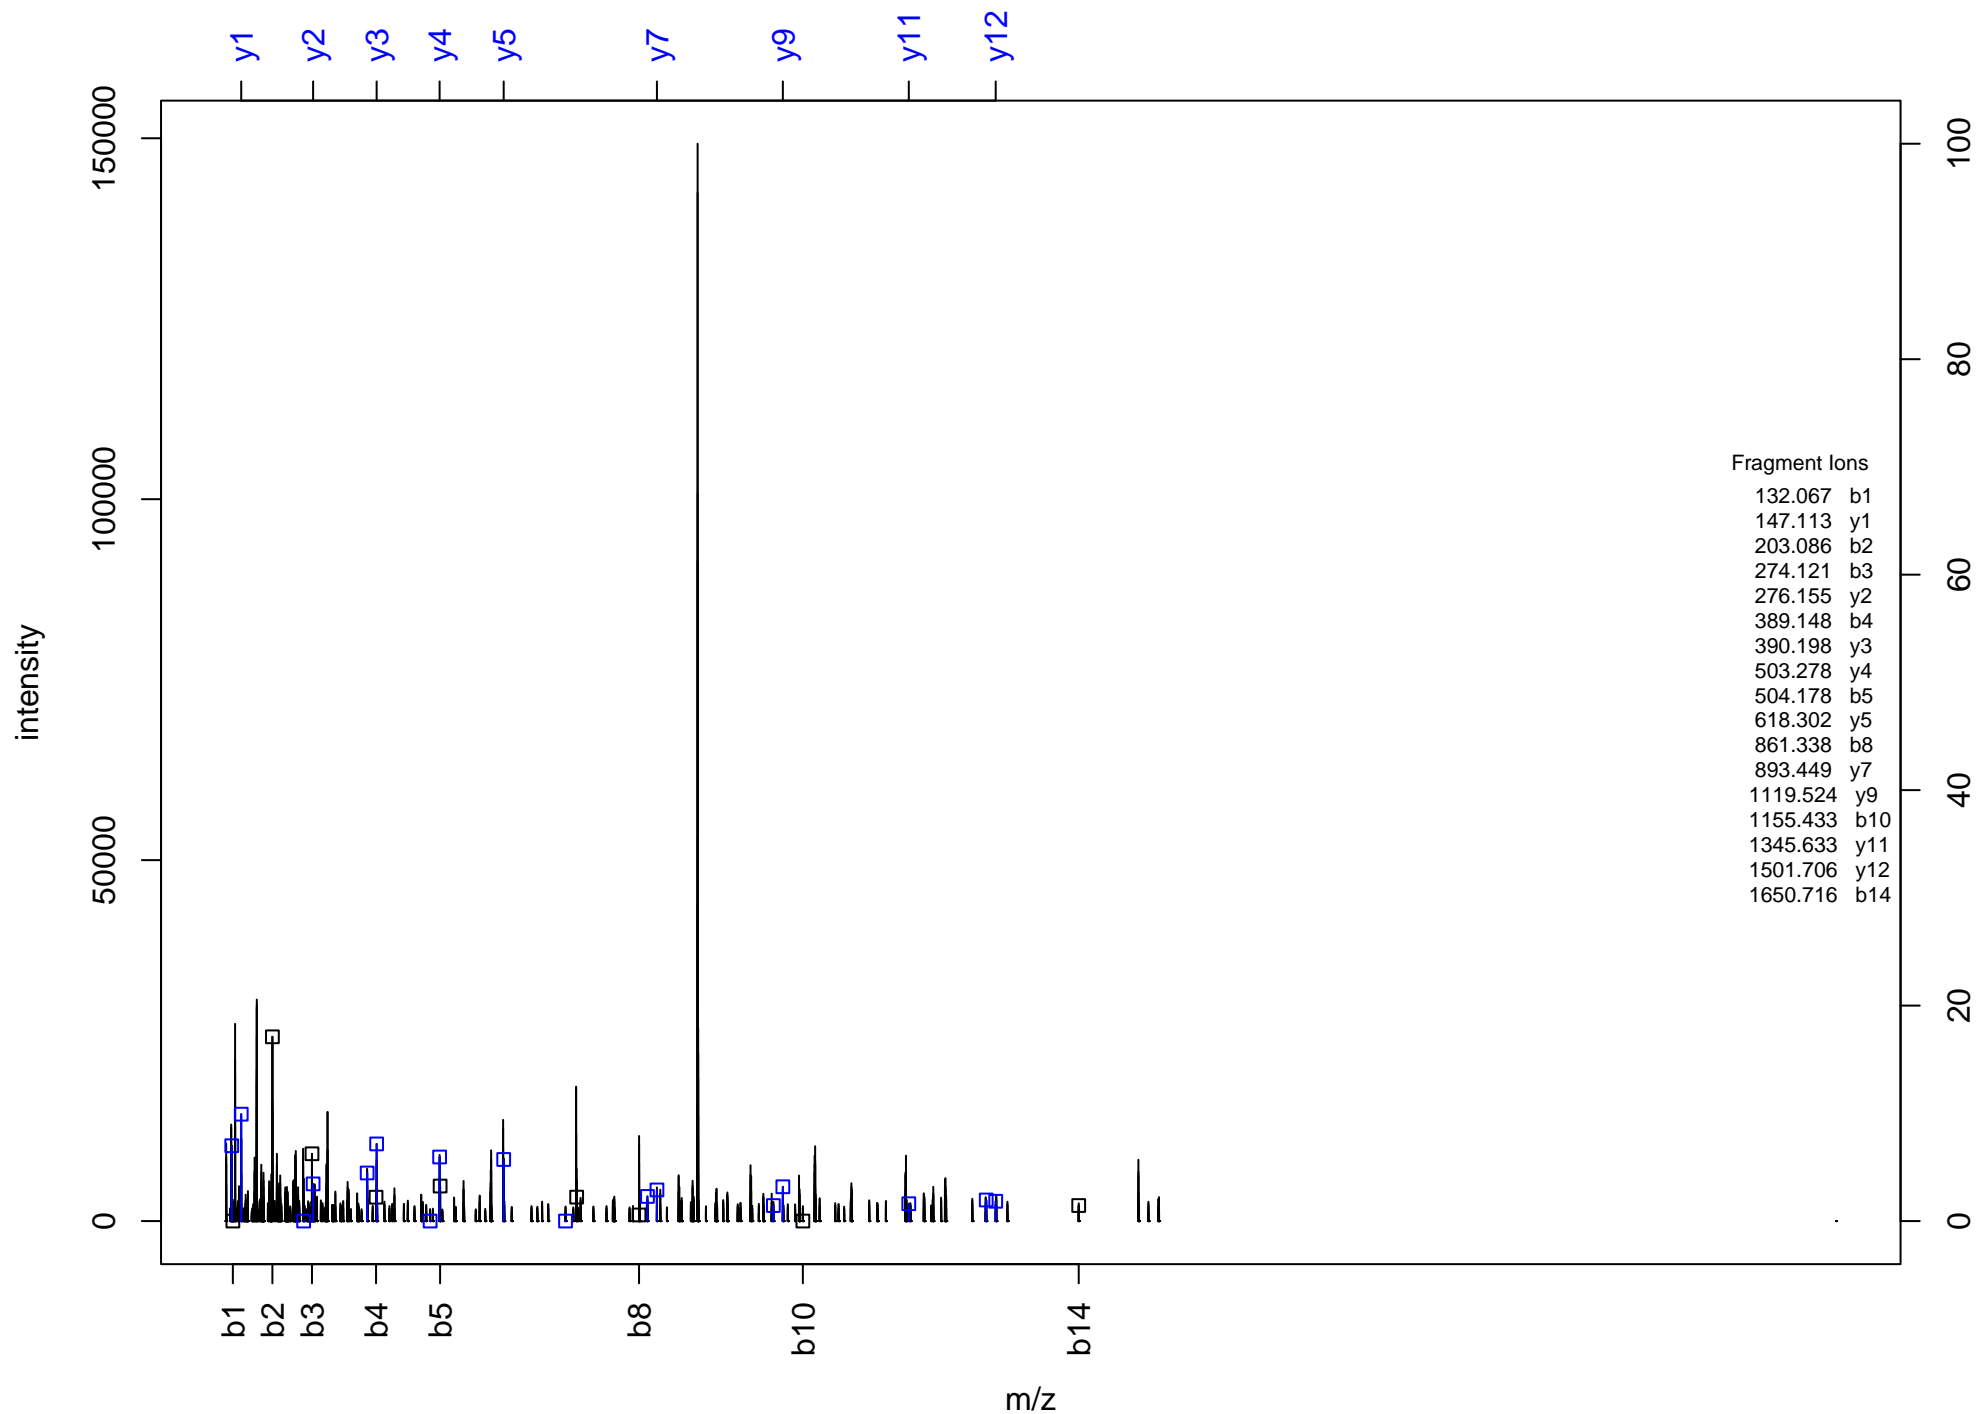



# VVLASQPDLECGFSR

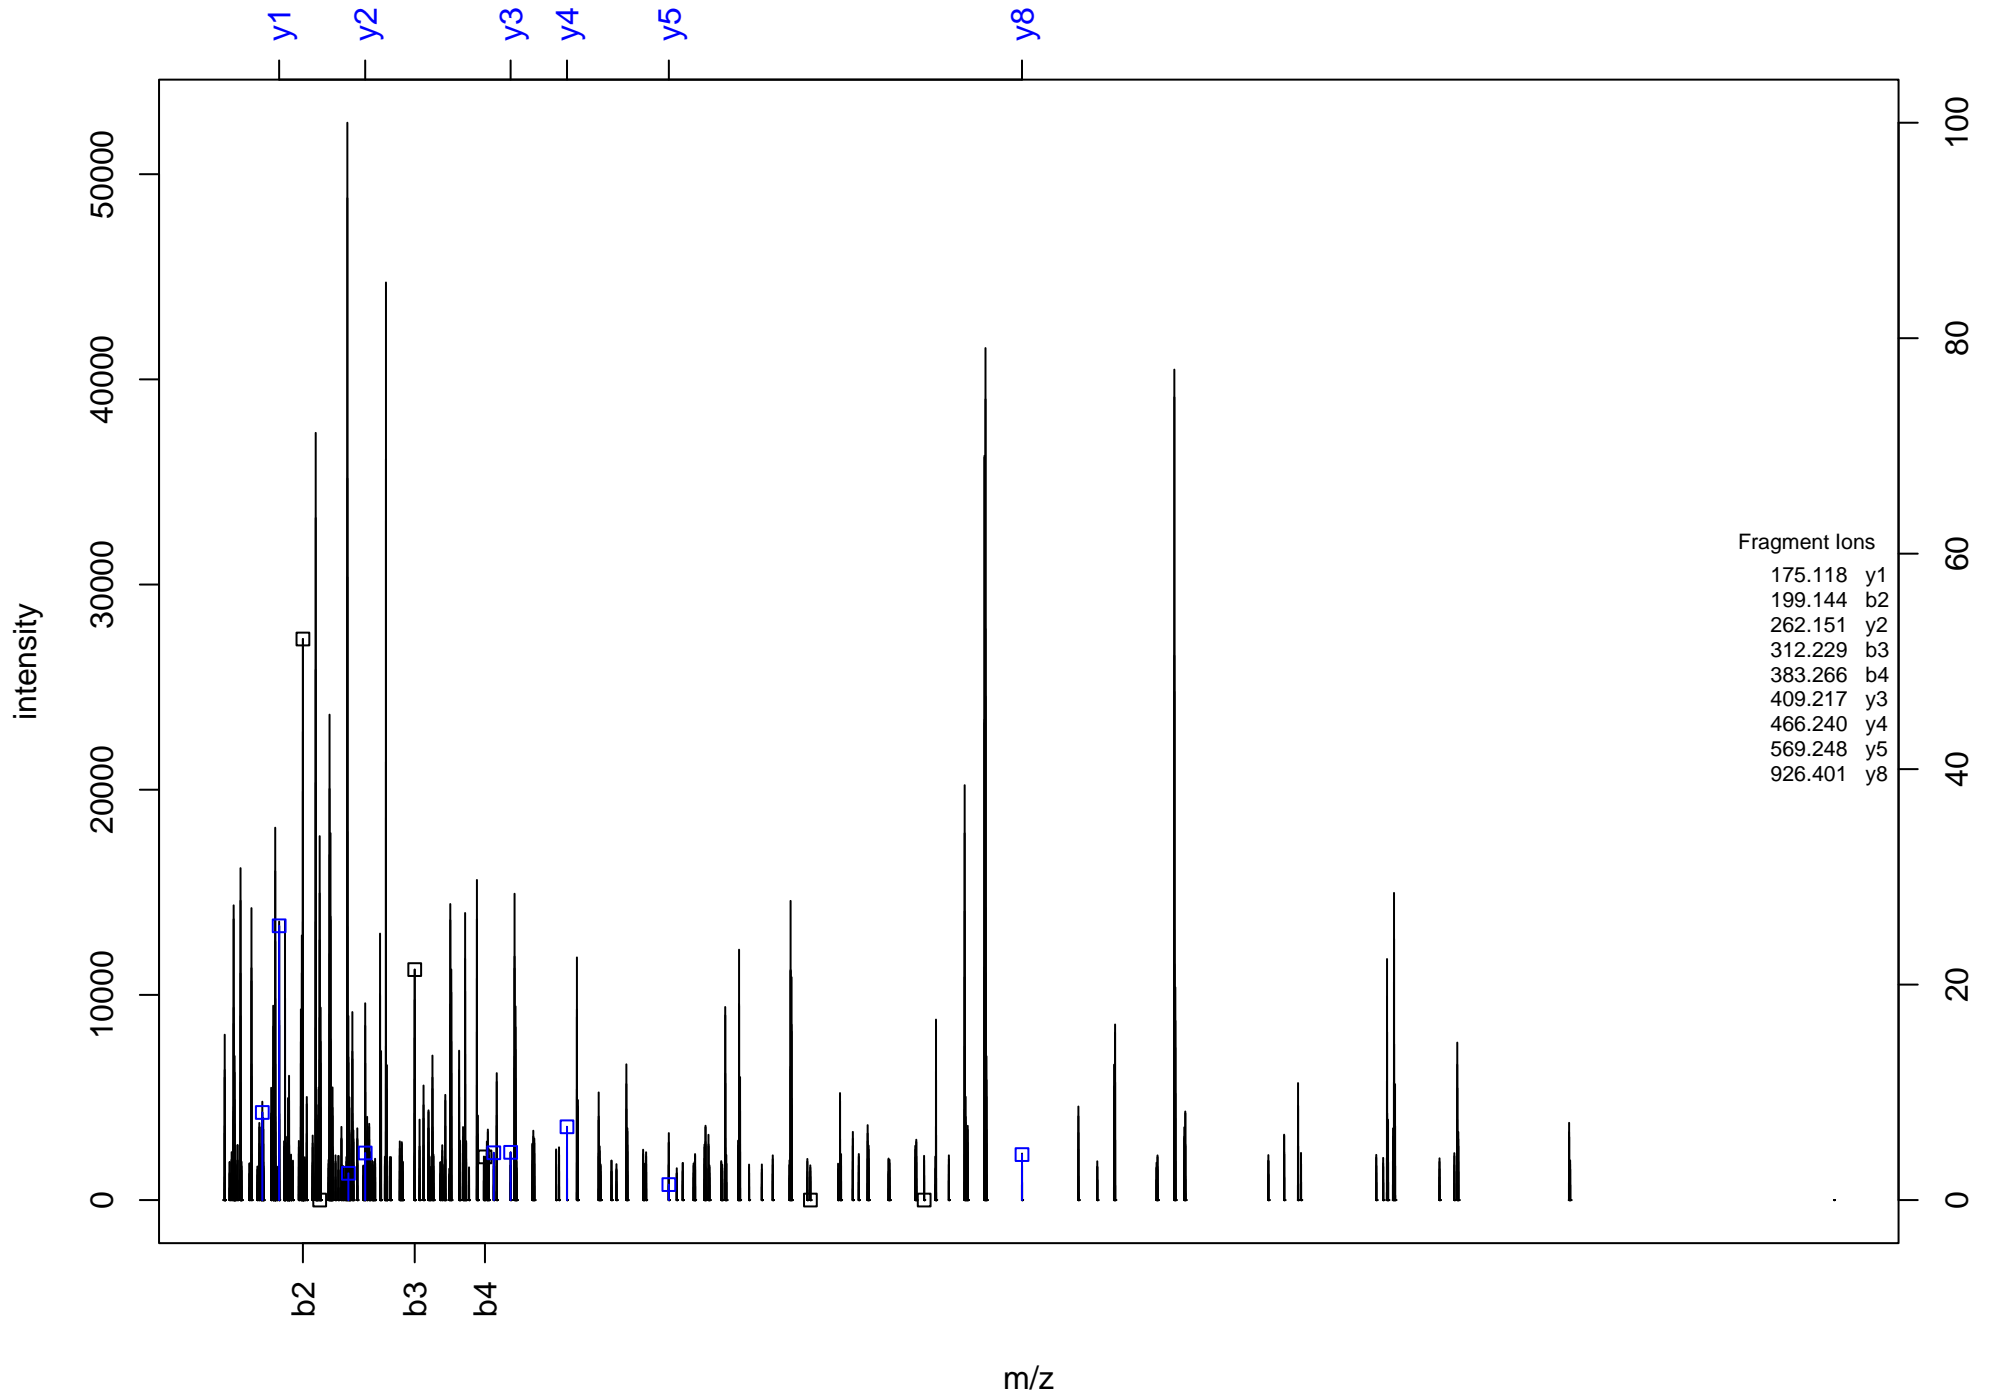

# FKEVTN^EM\*IVTKNGR

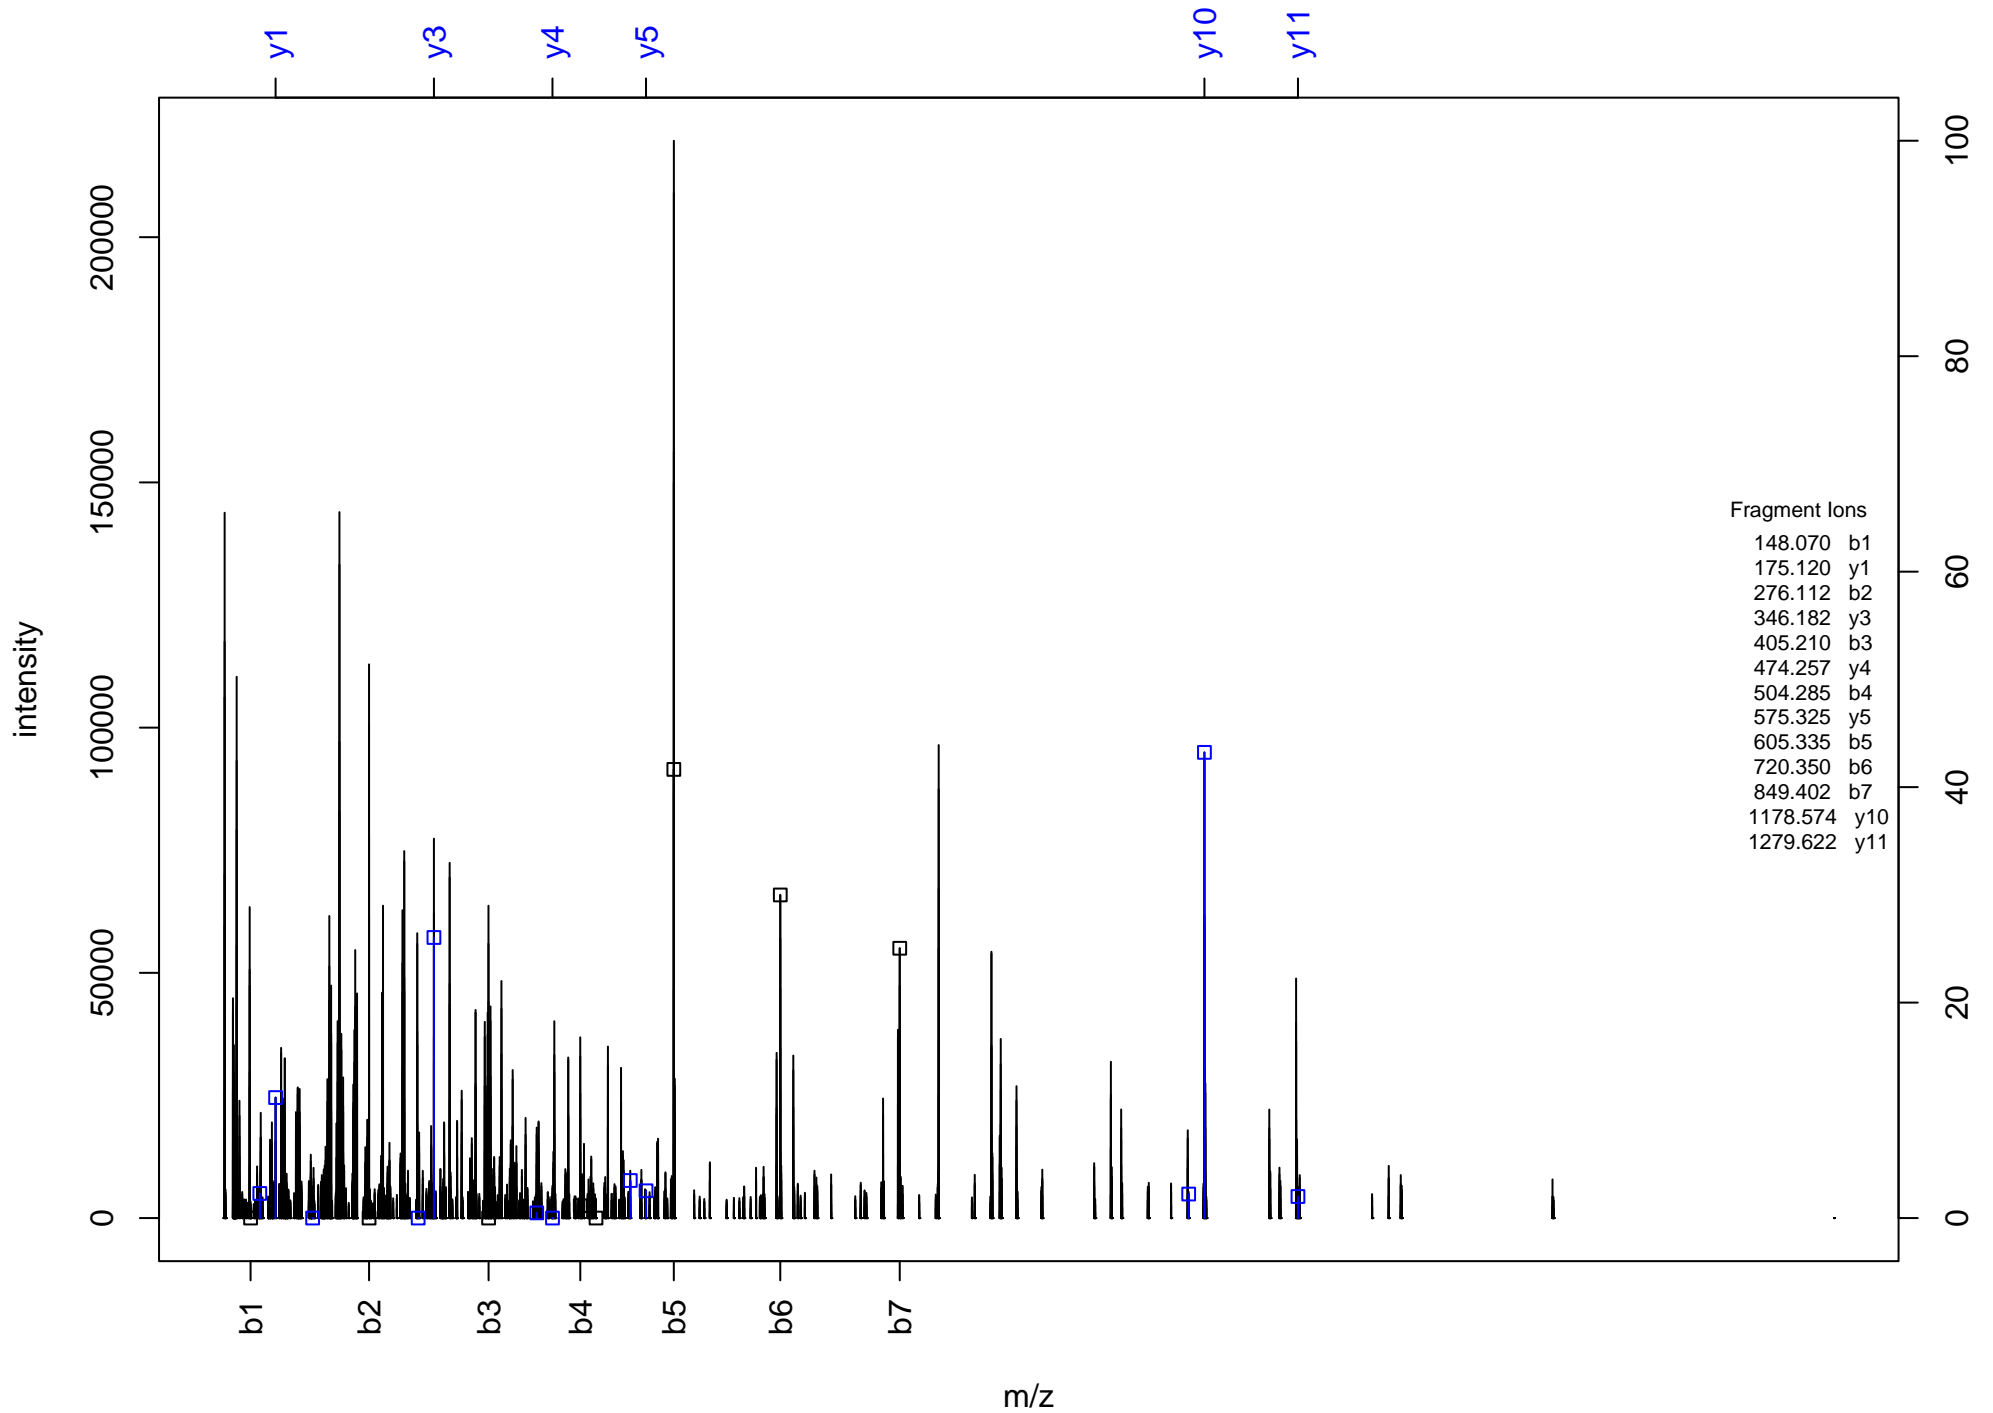

# M\*FIEDLHN^LN^KR

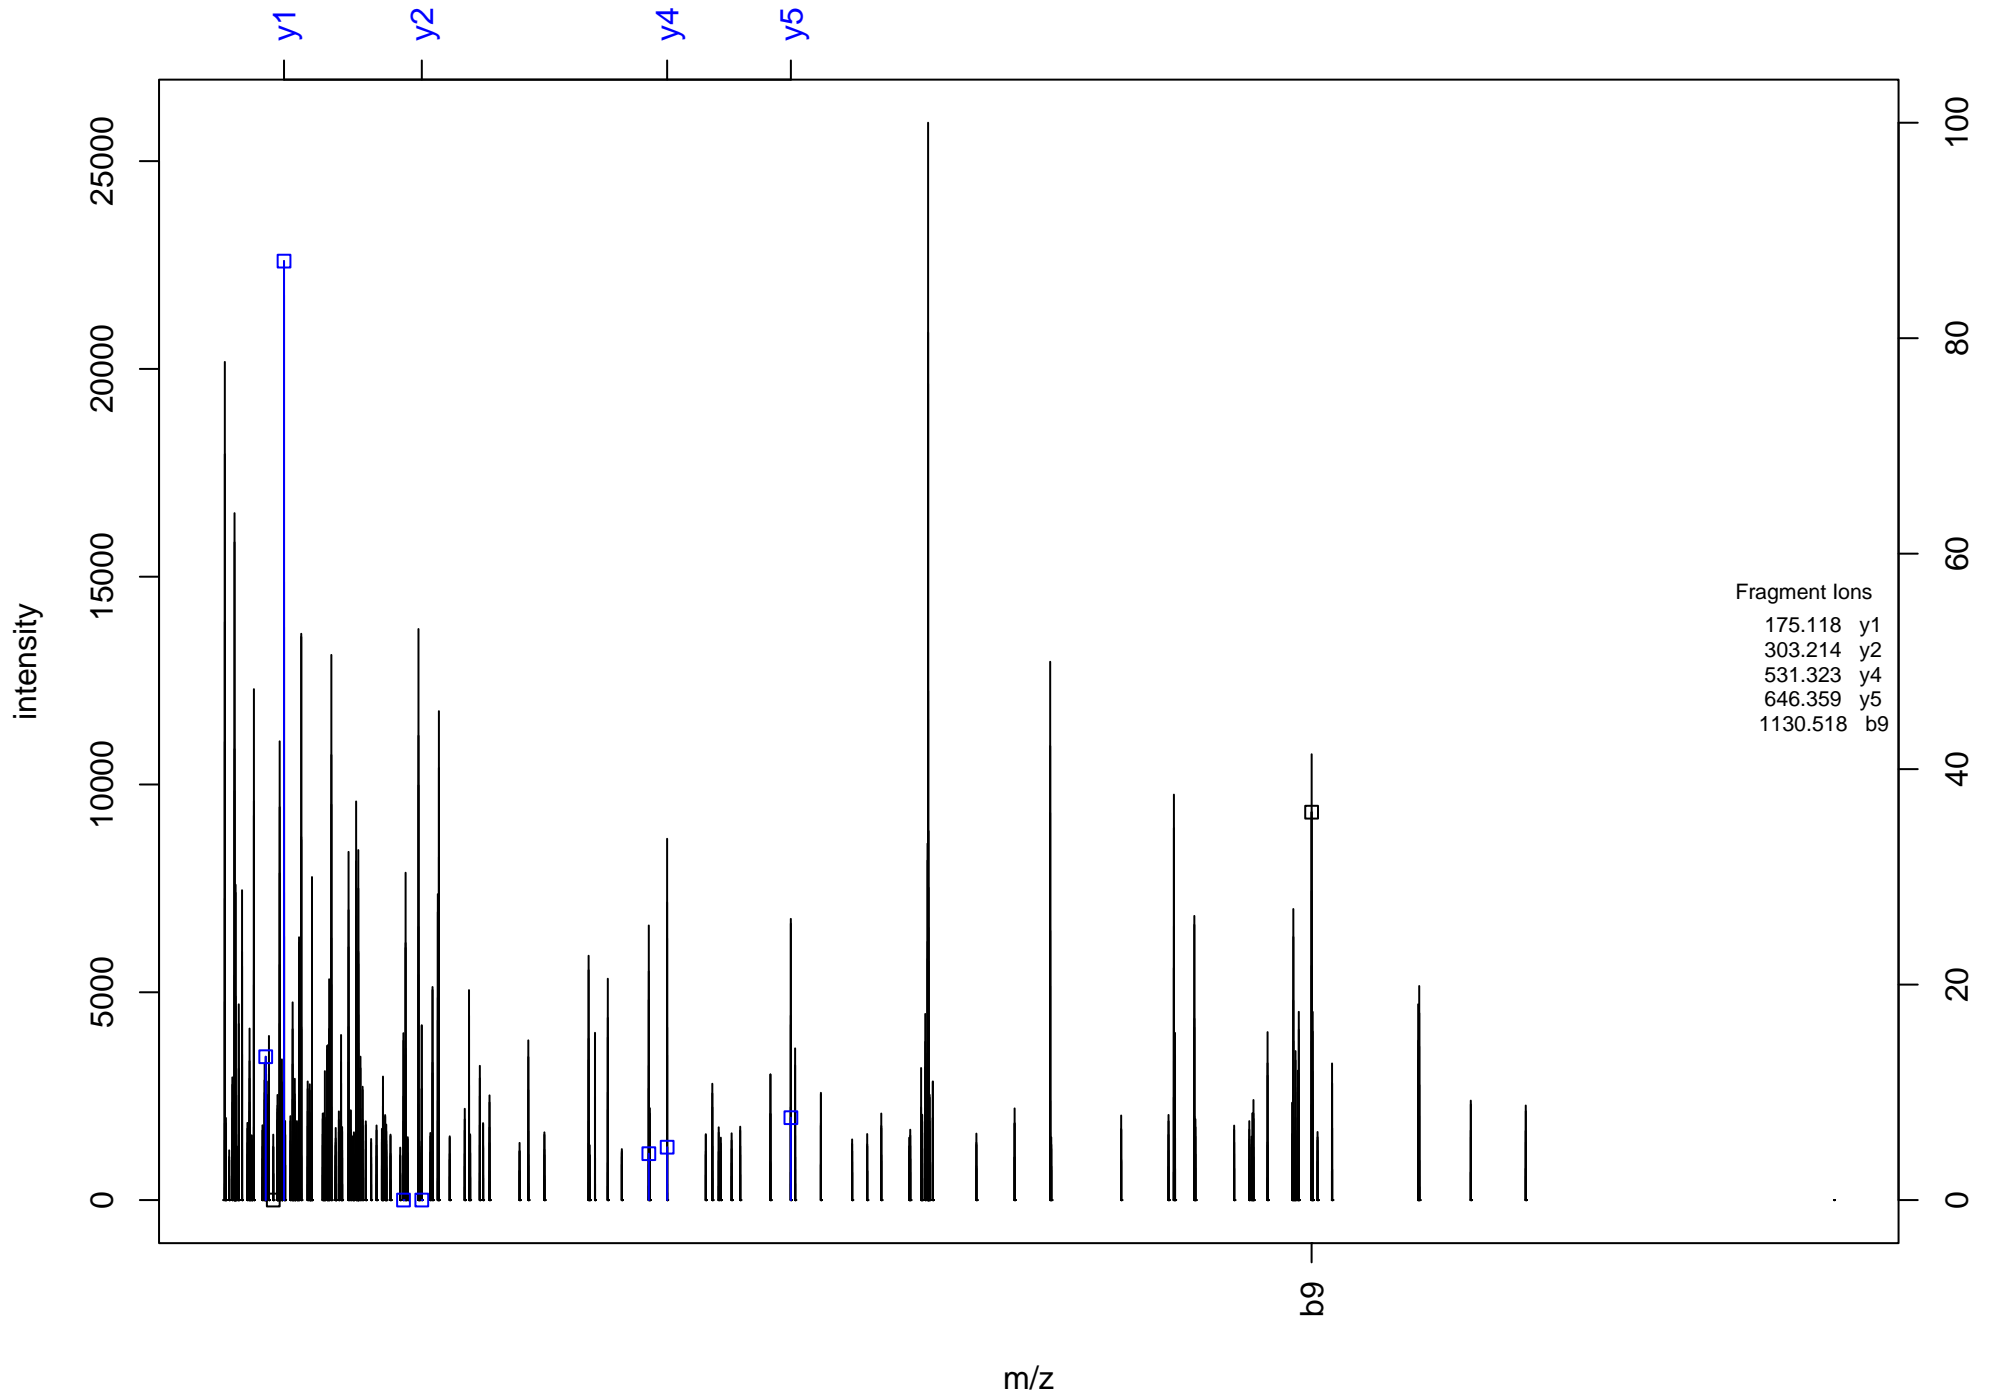

# N<sup>1</sup>ISAQNTKDQHKNIAQEFPEESIGQAENK

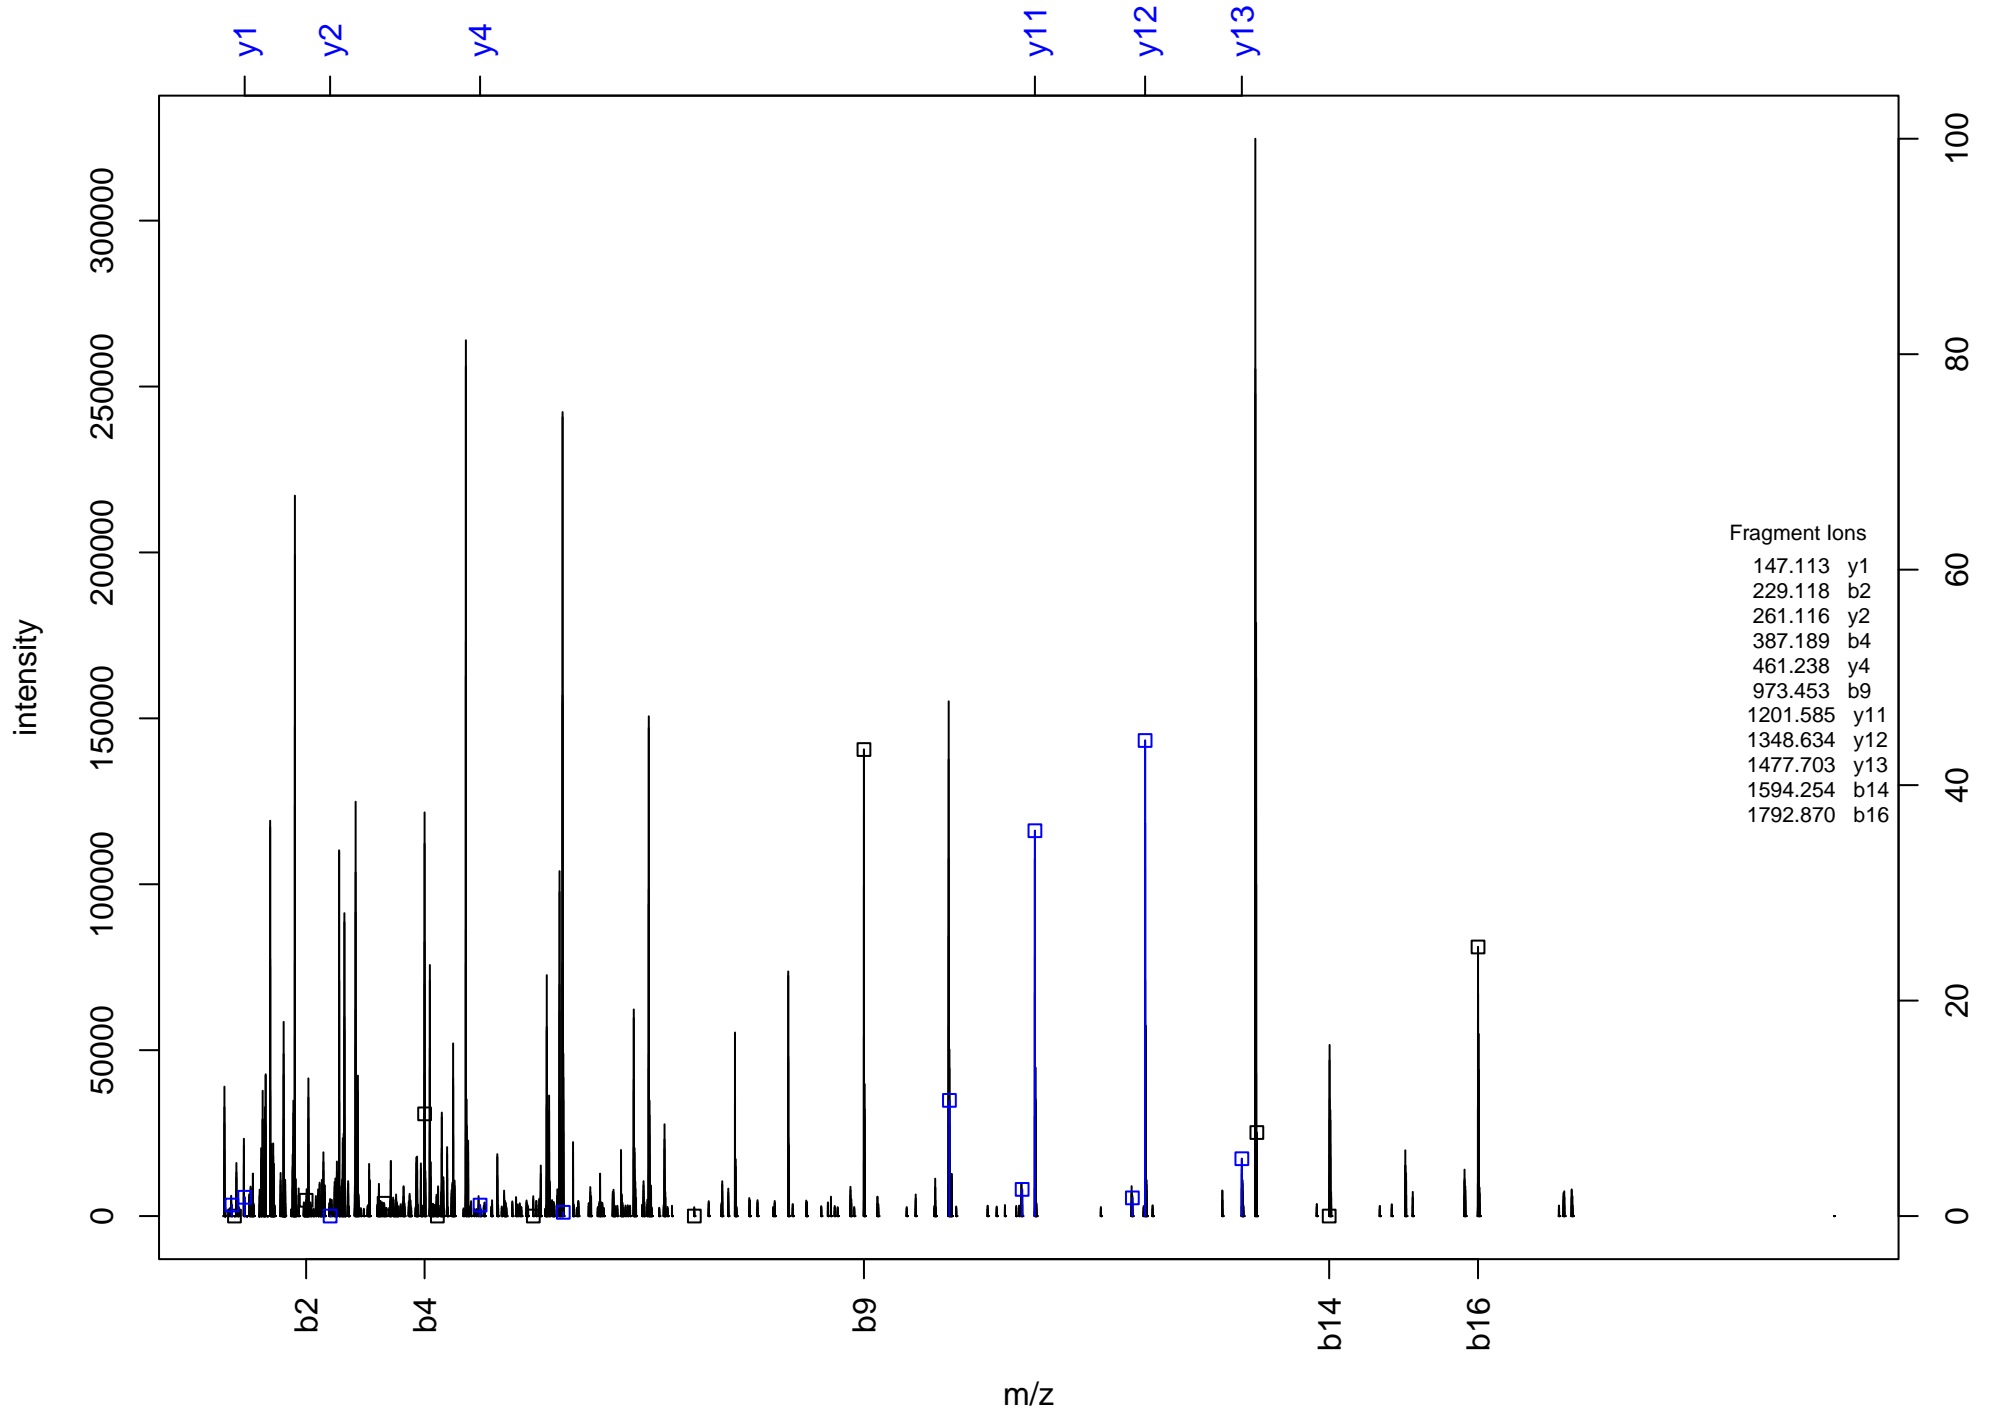

# EELATRLN<sup>^</sup>SSQTADLLK

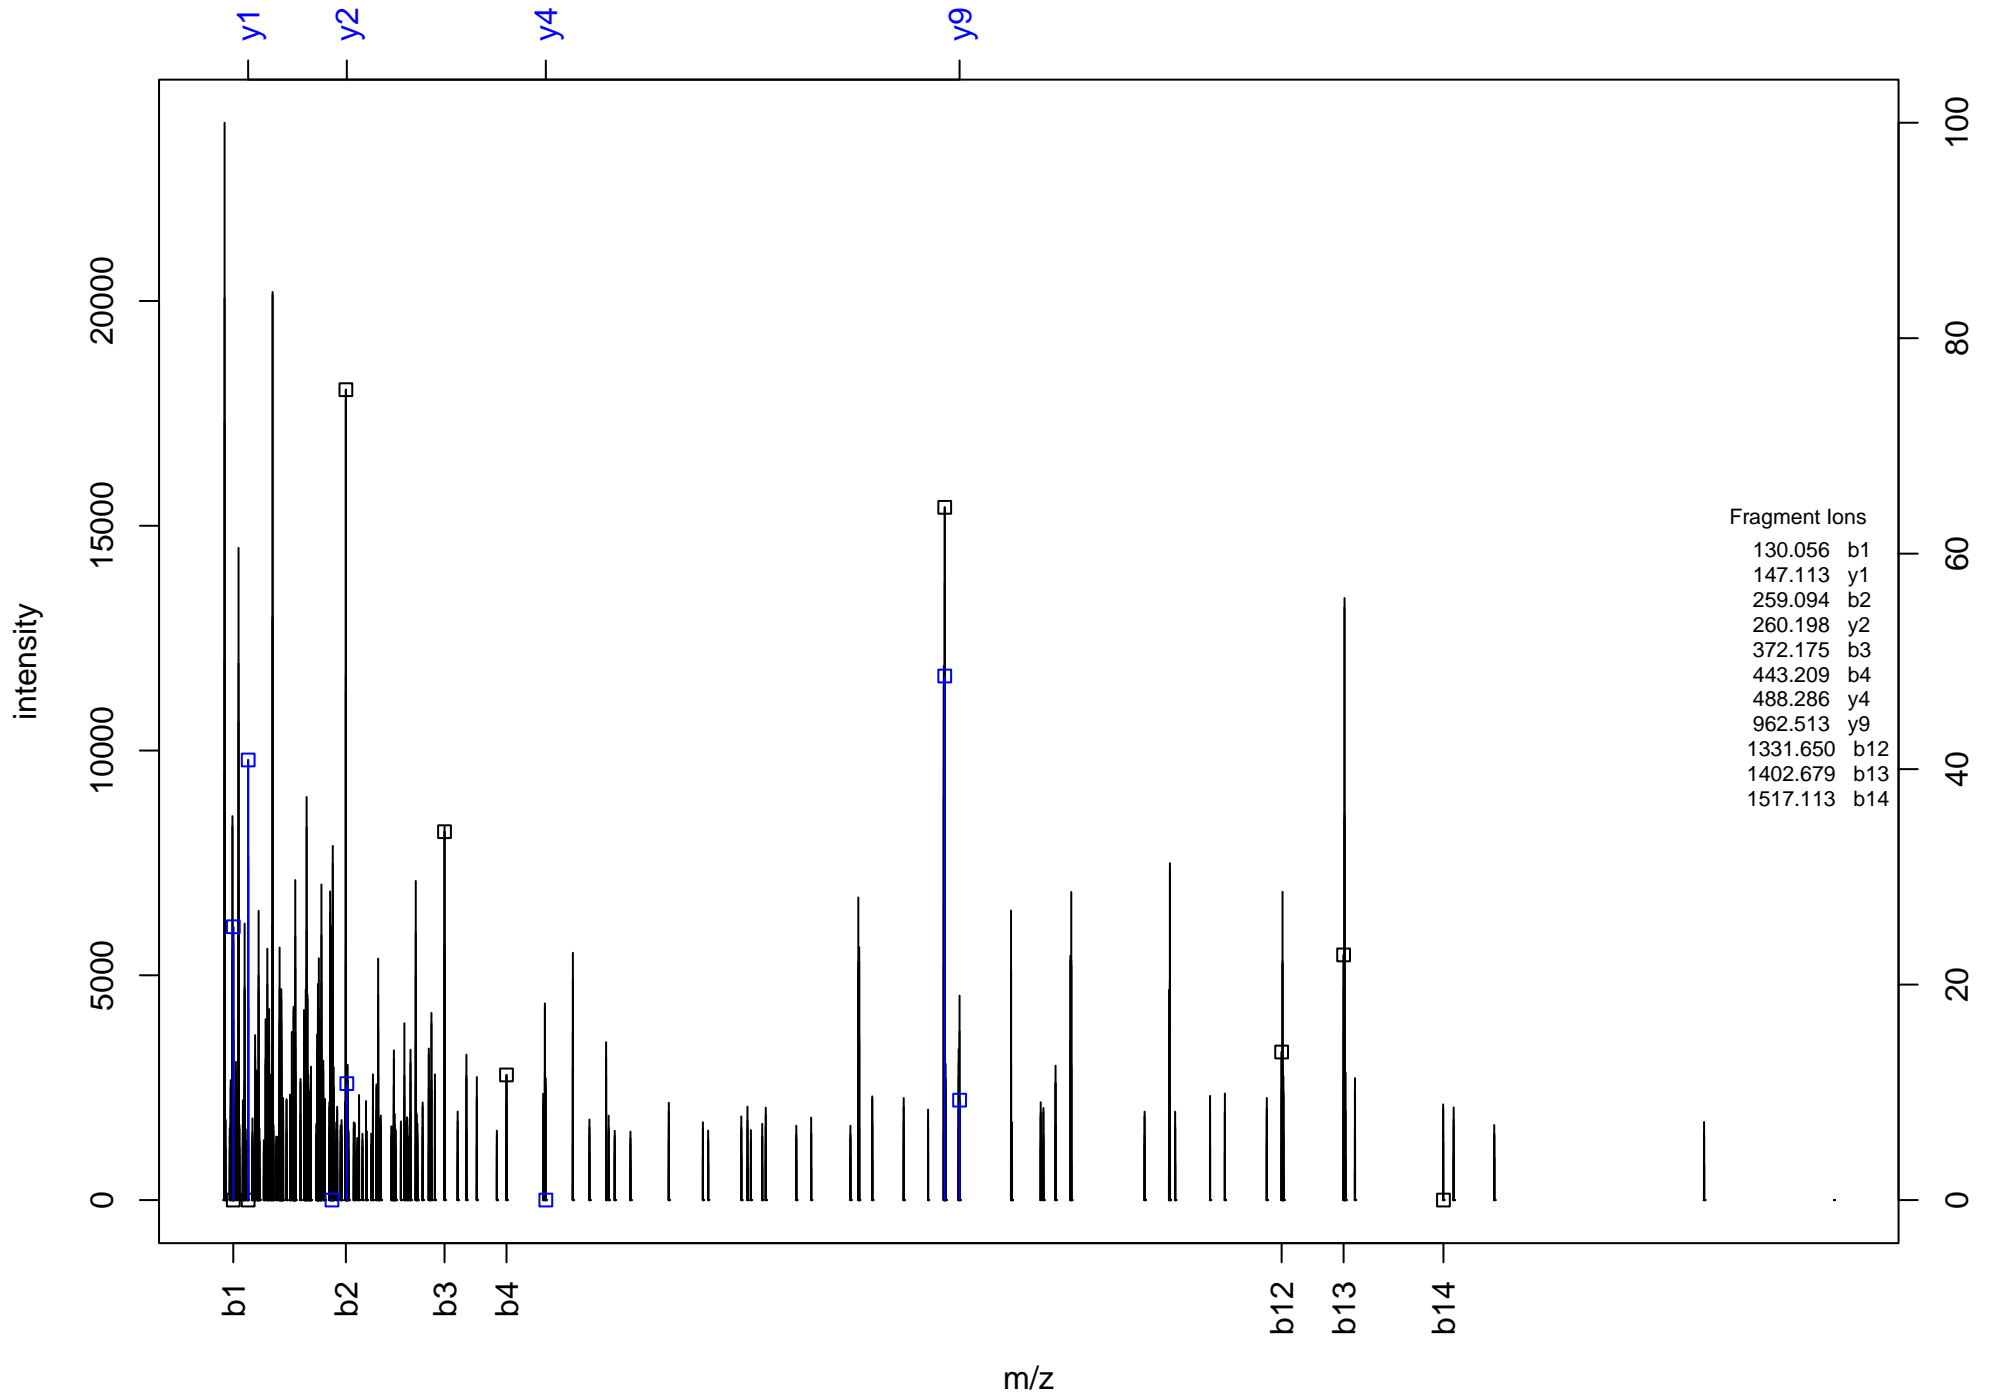

# VAGQDGSVVQFK

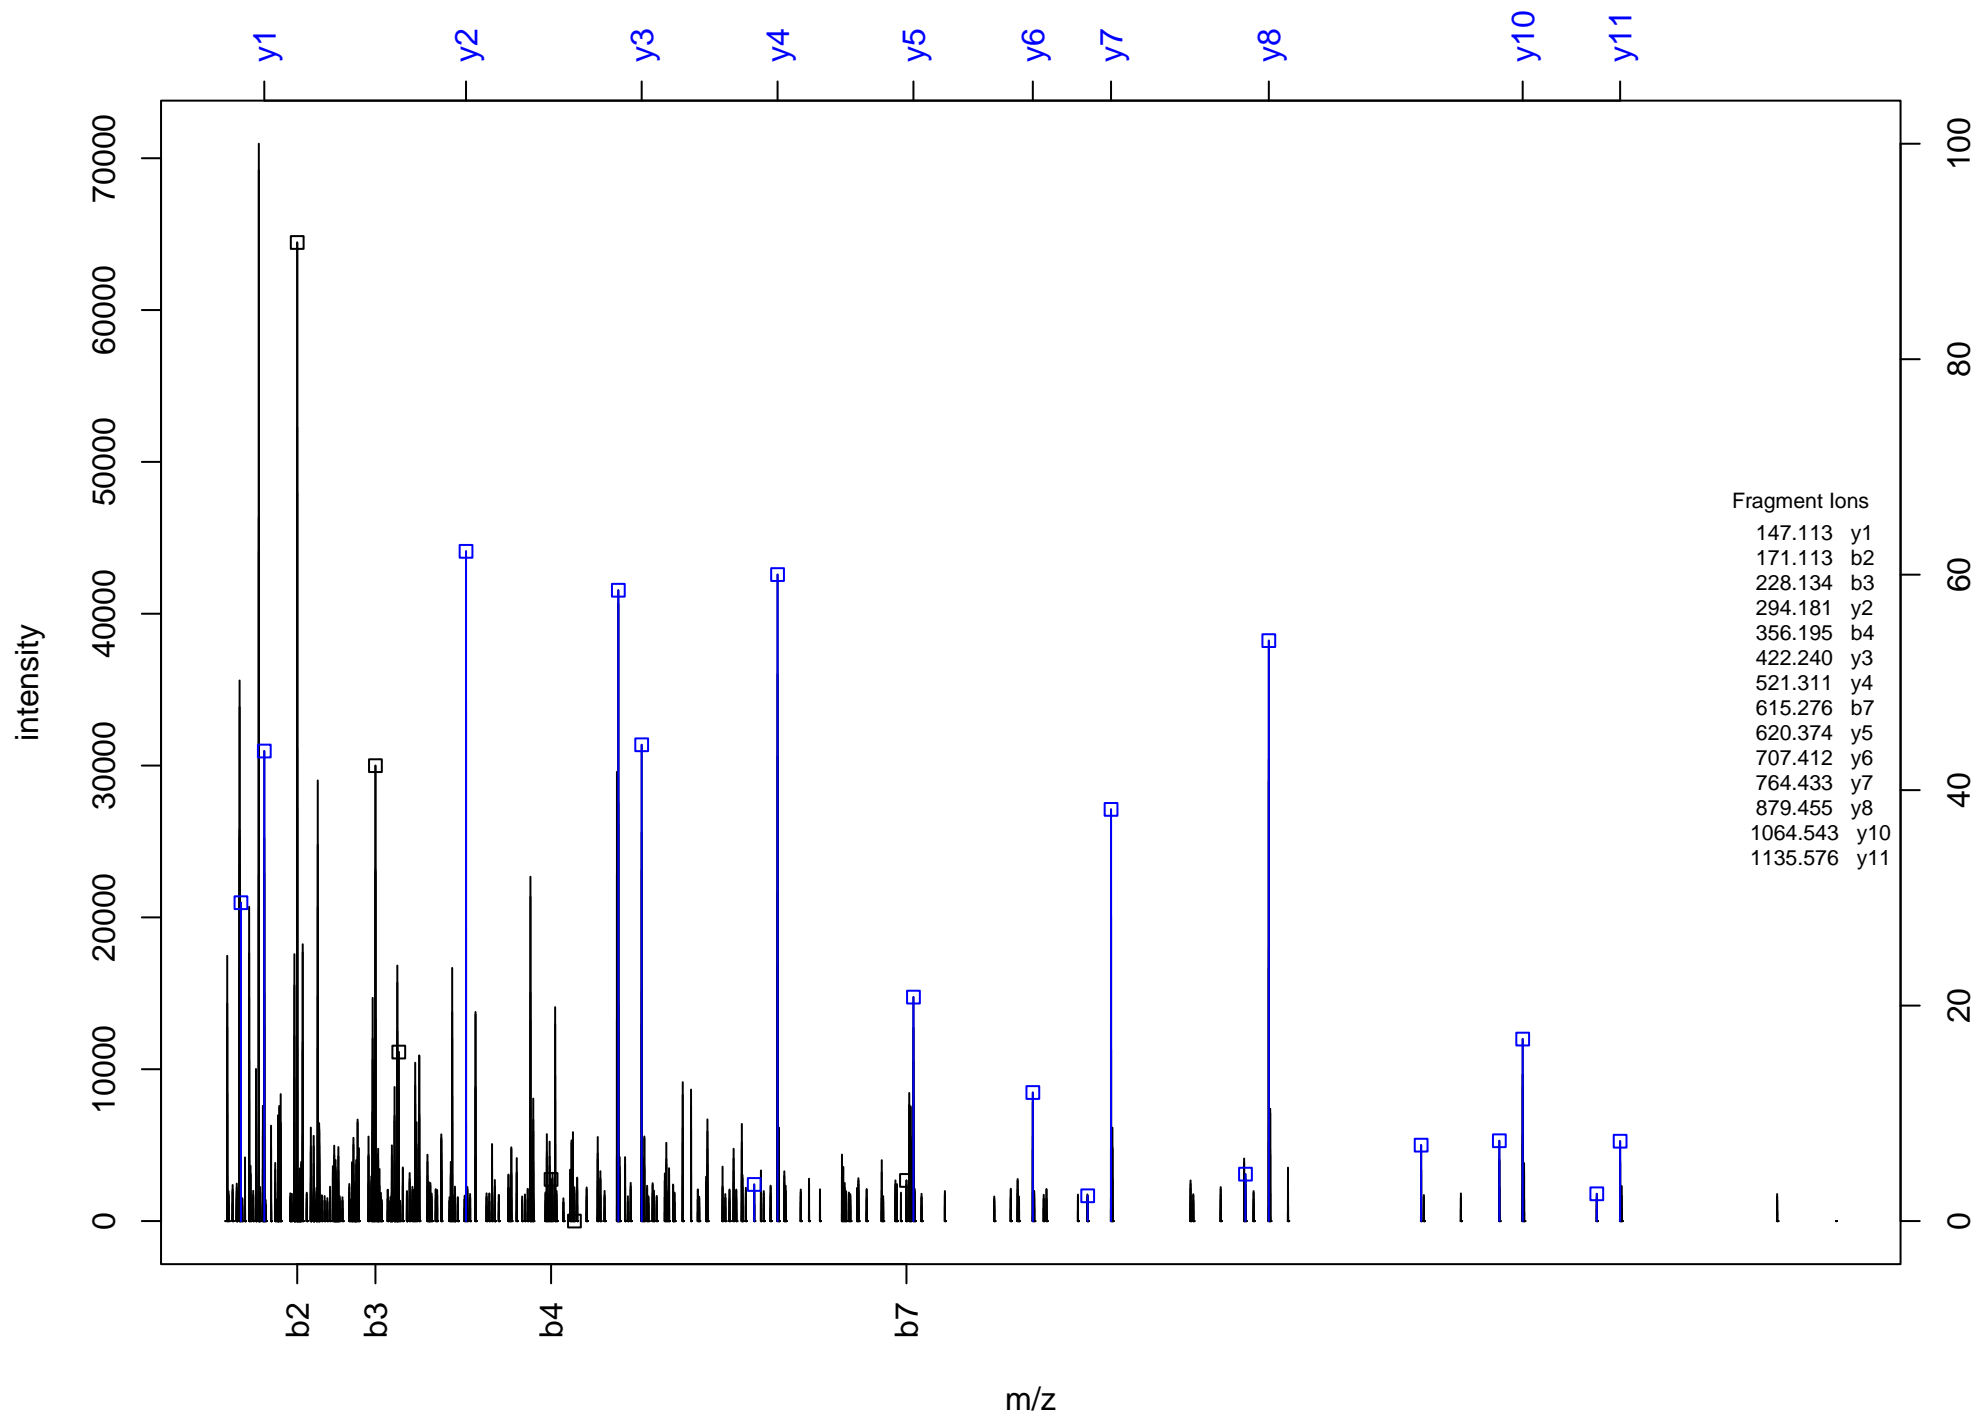

# VVVTVEQTEELQR

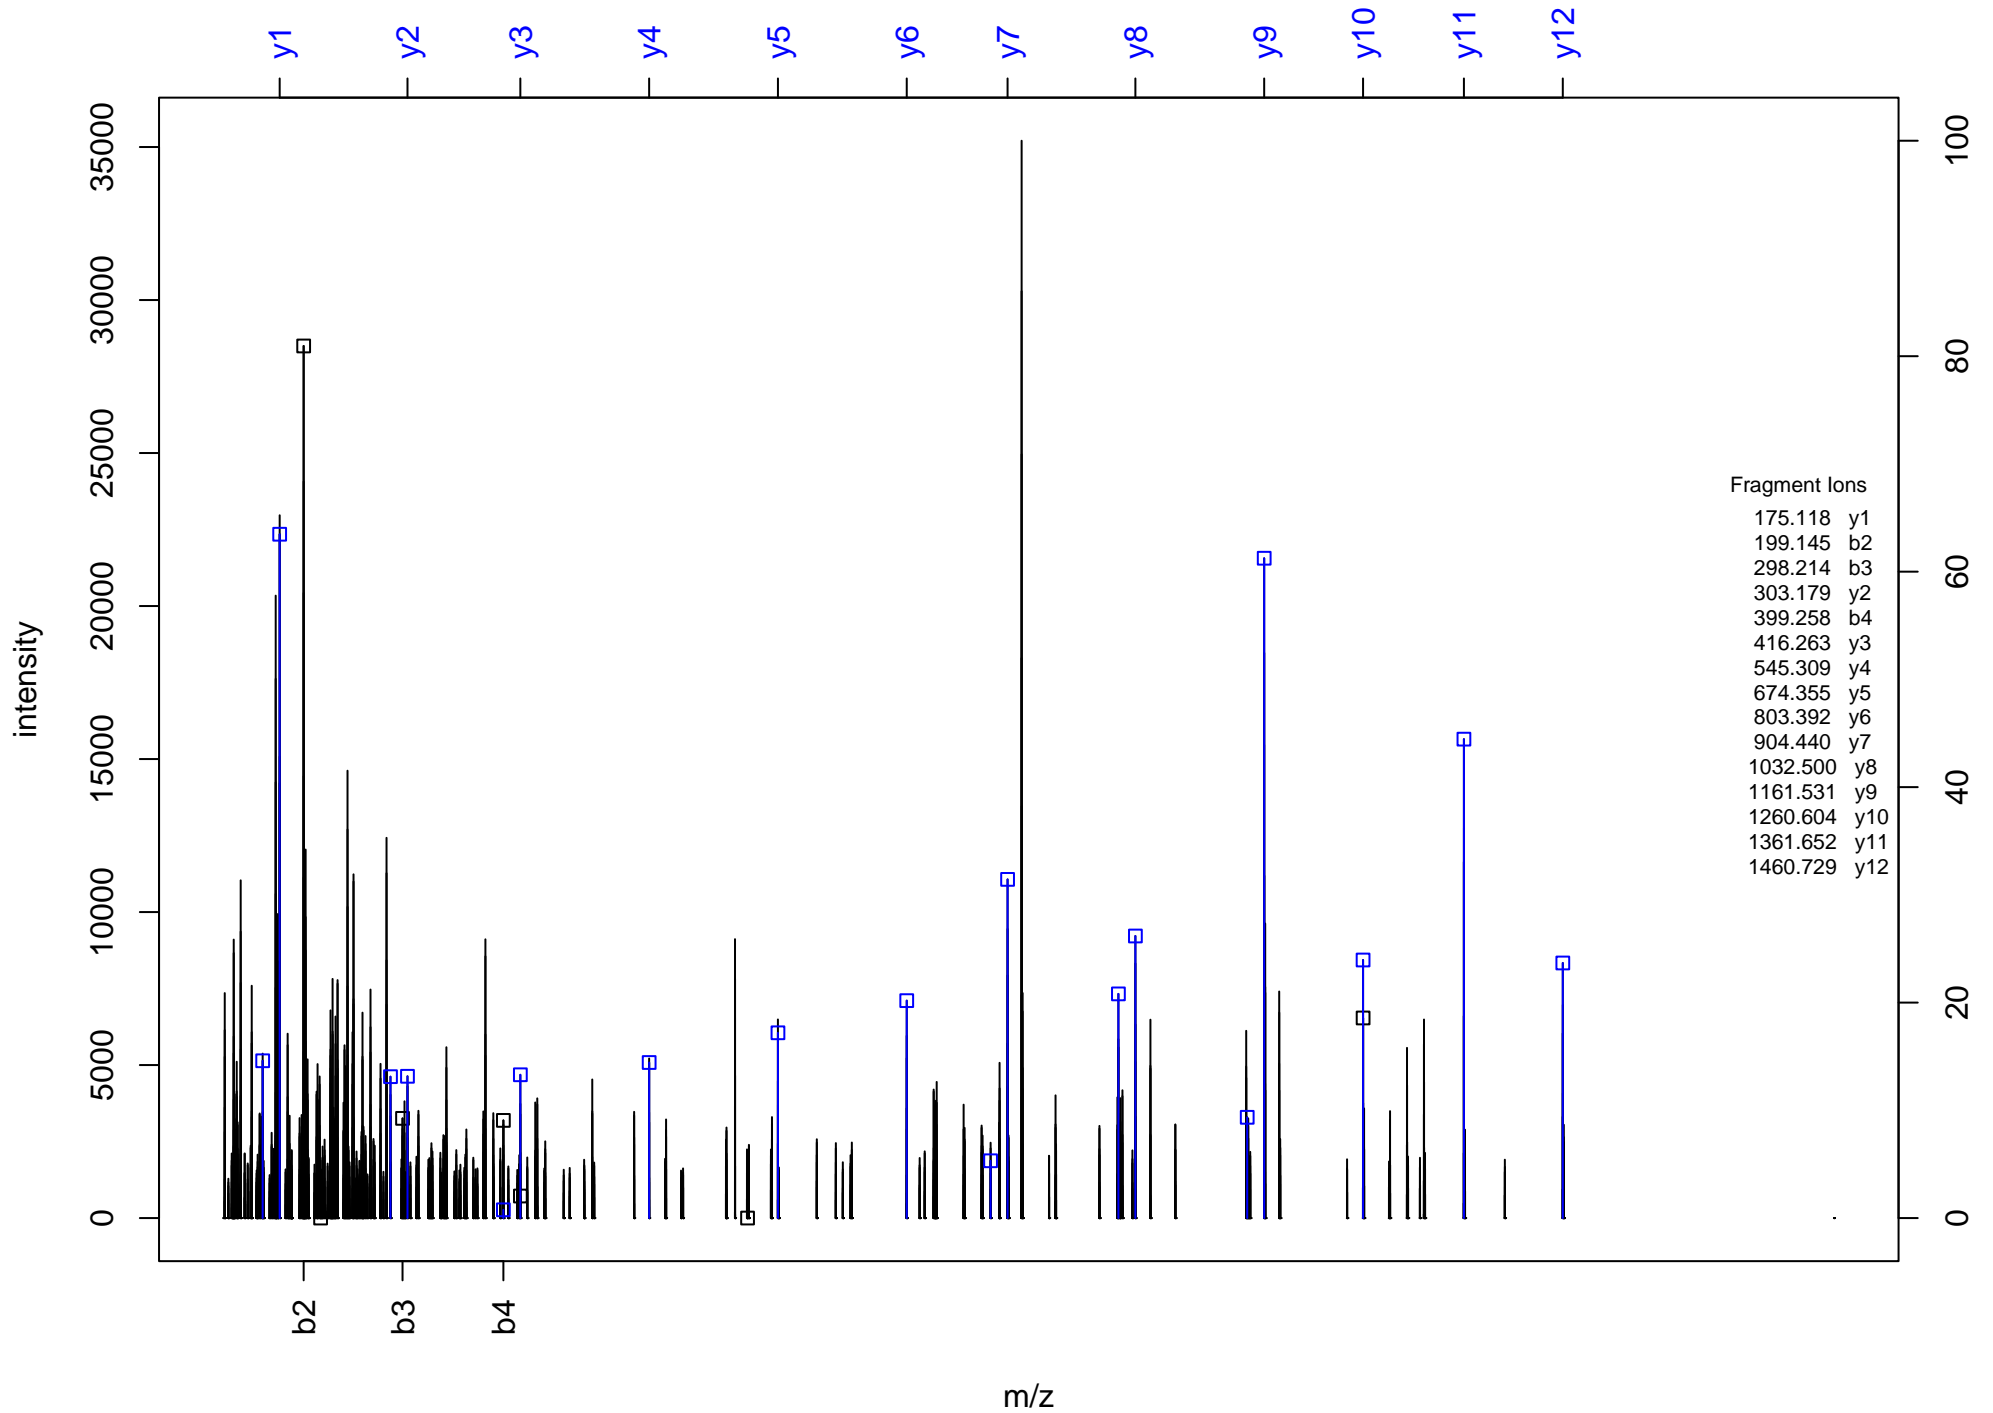

# QQGPSPPGVQLDVAPQSLNPEVLLK

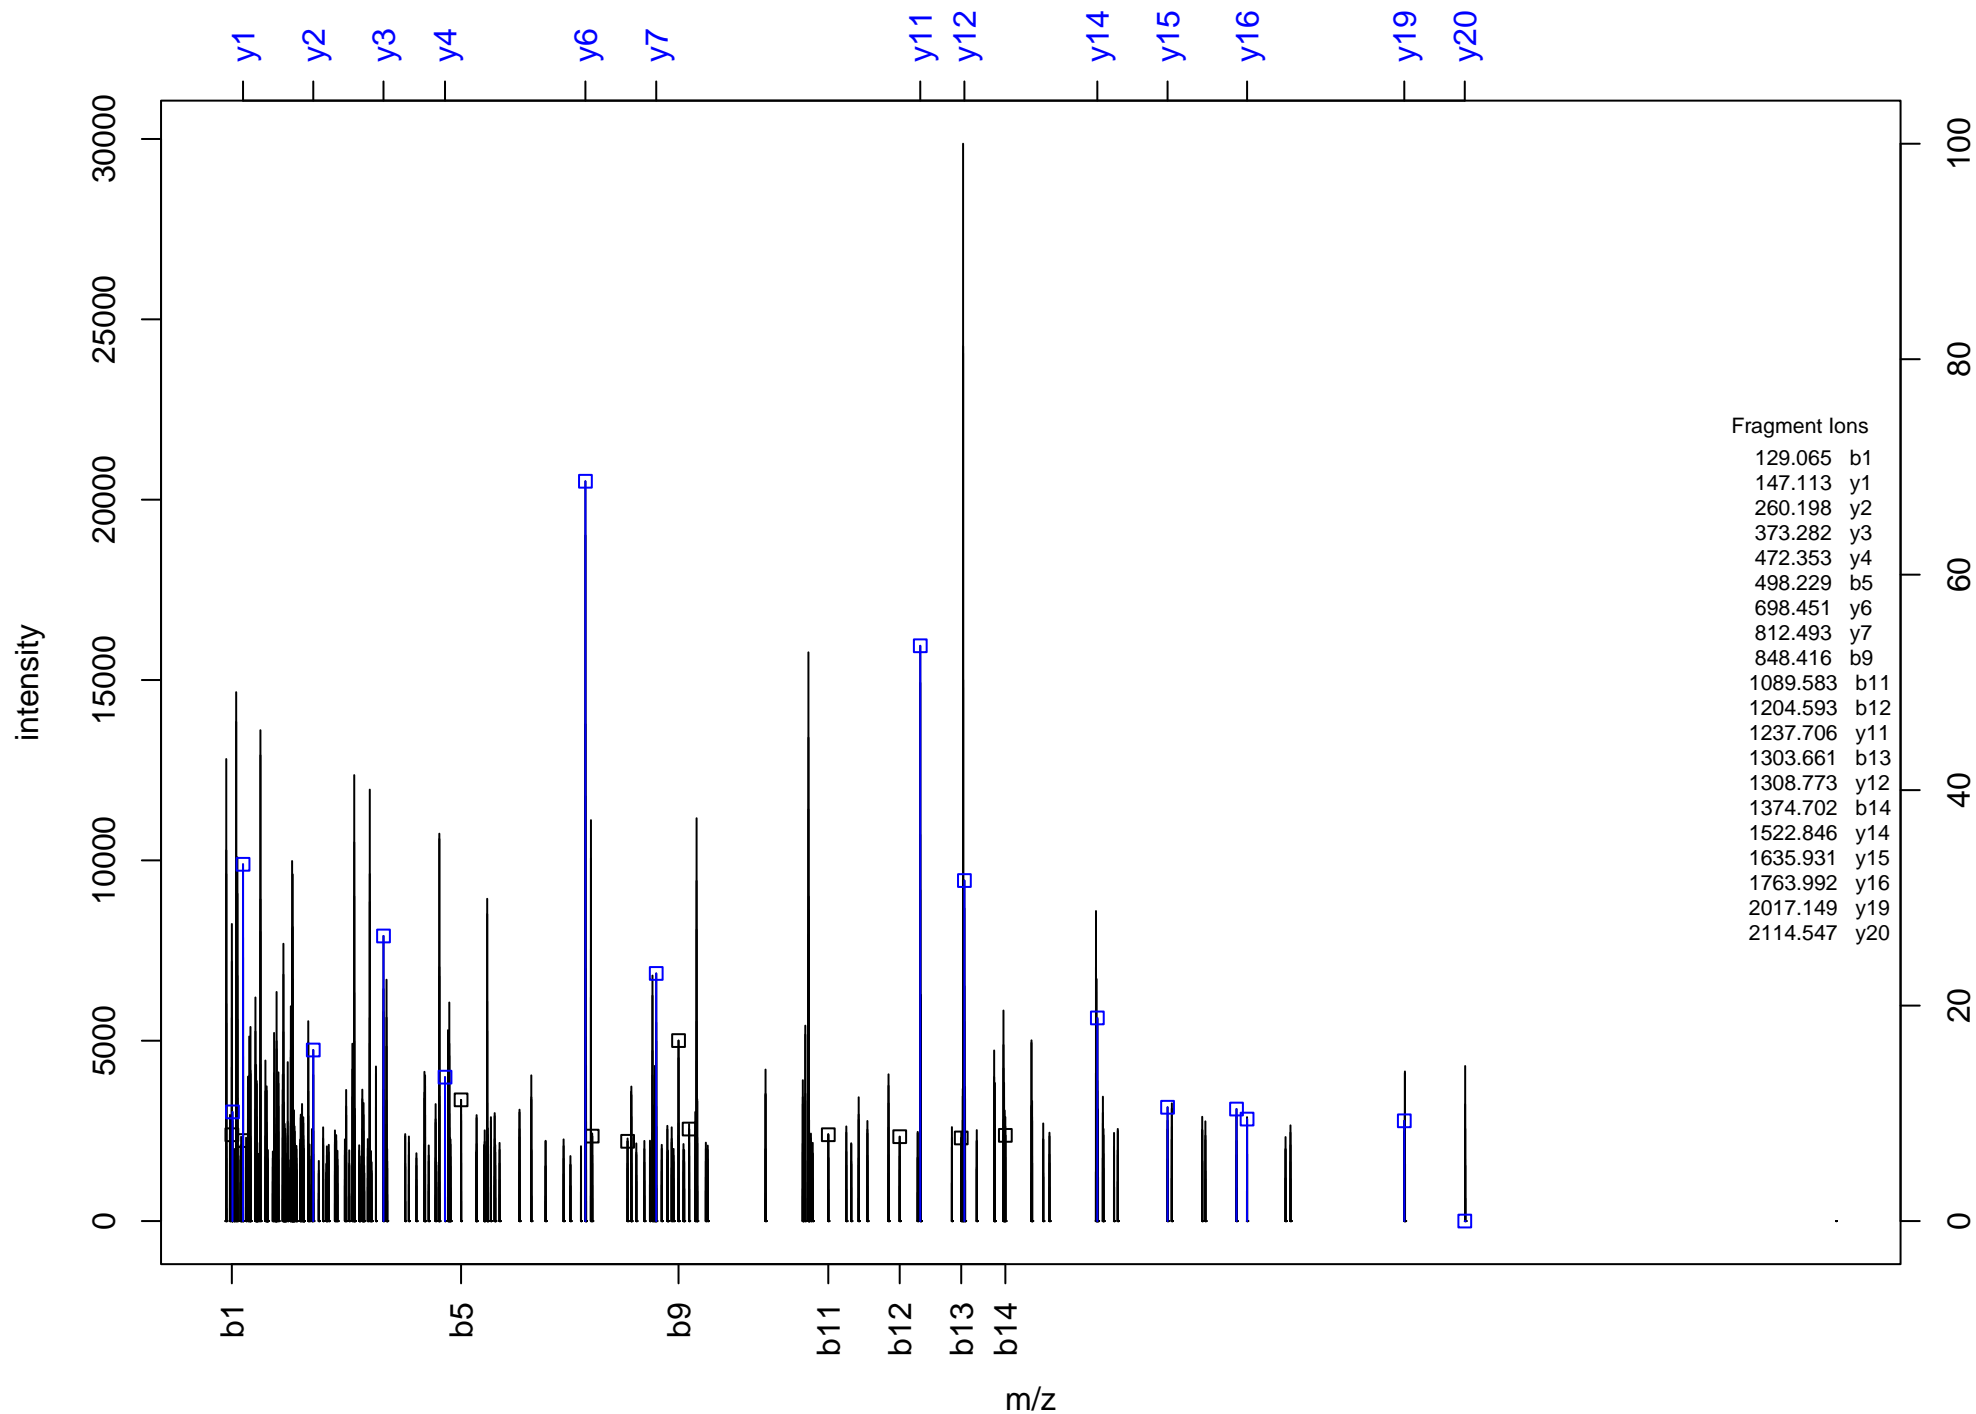



# ELPVQAYWEADLEDELQTDGSQASR

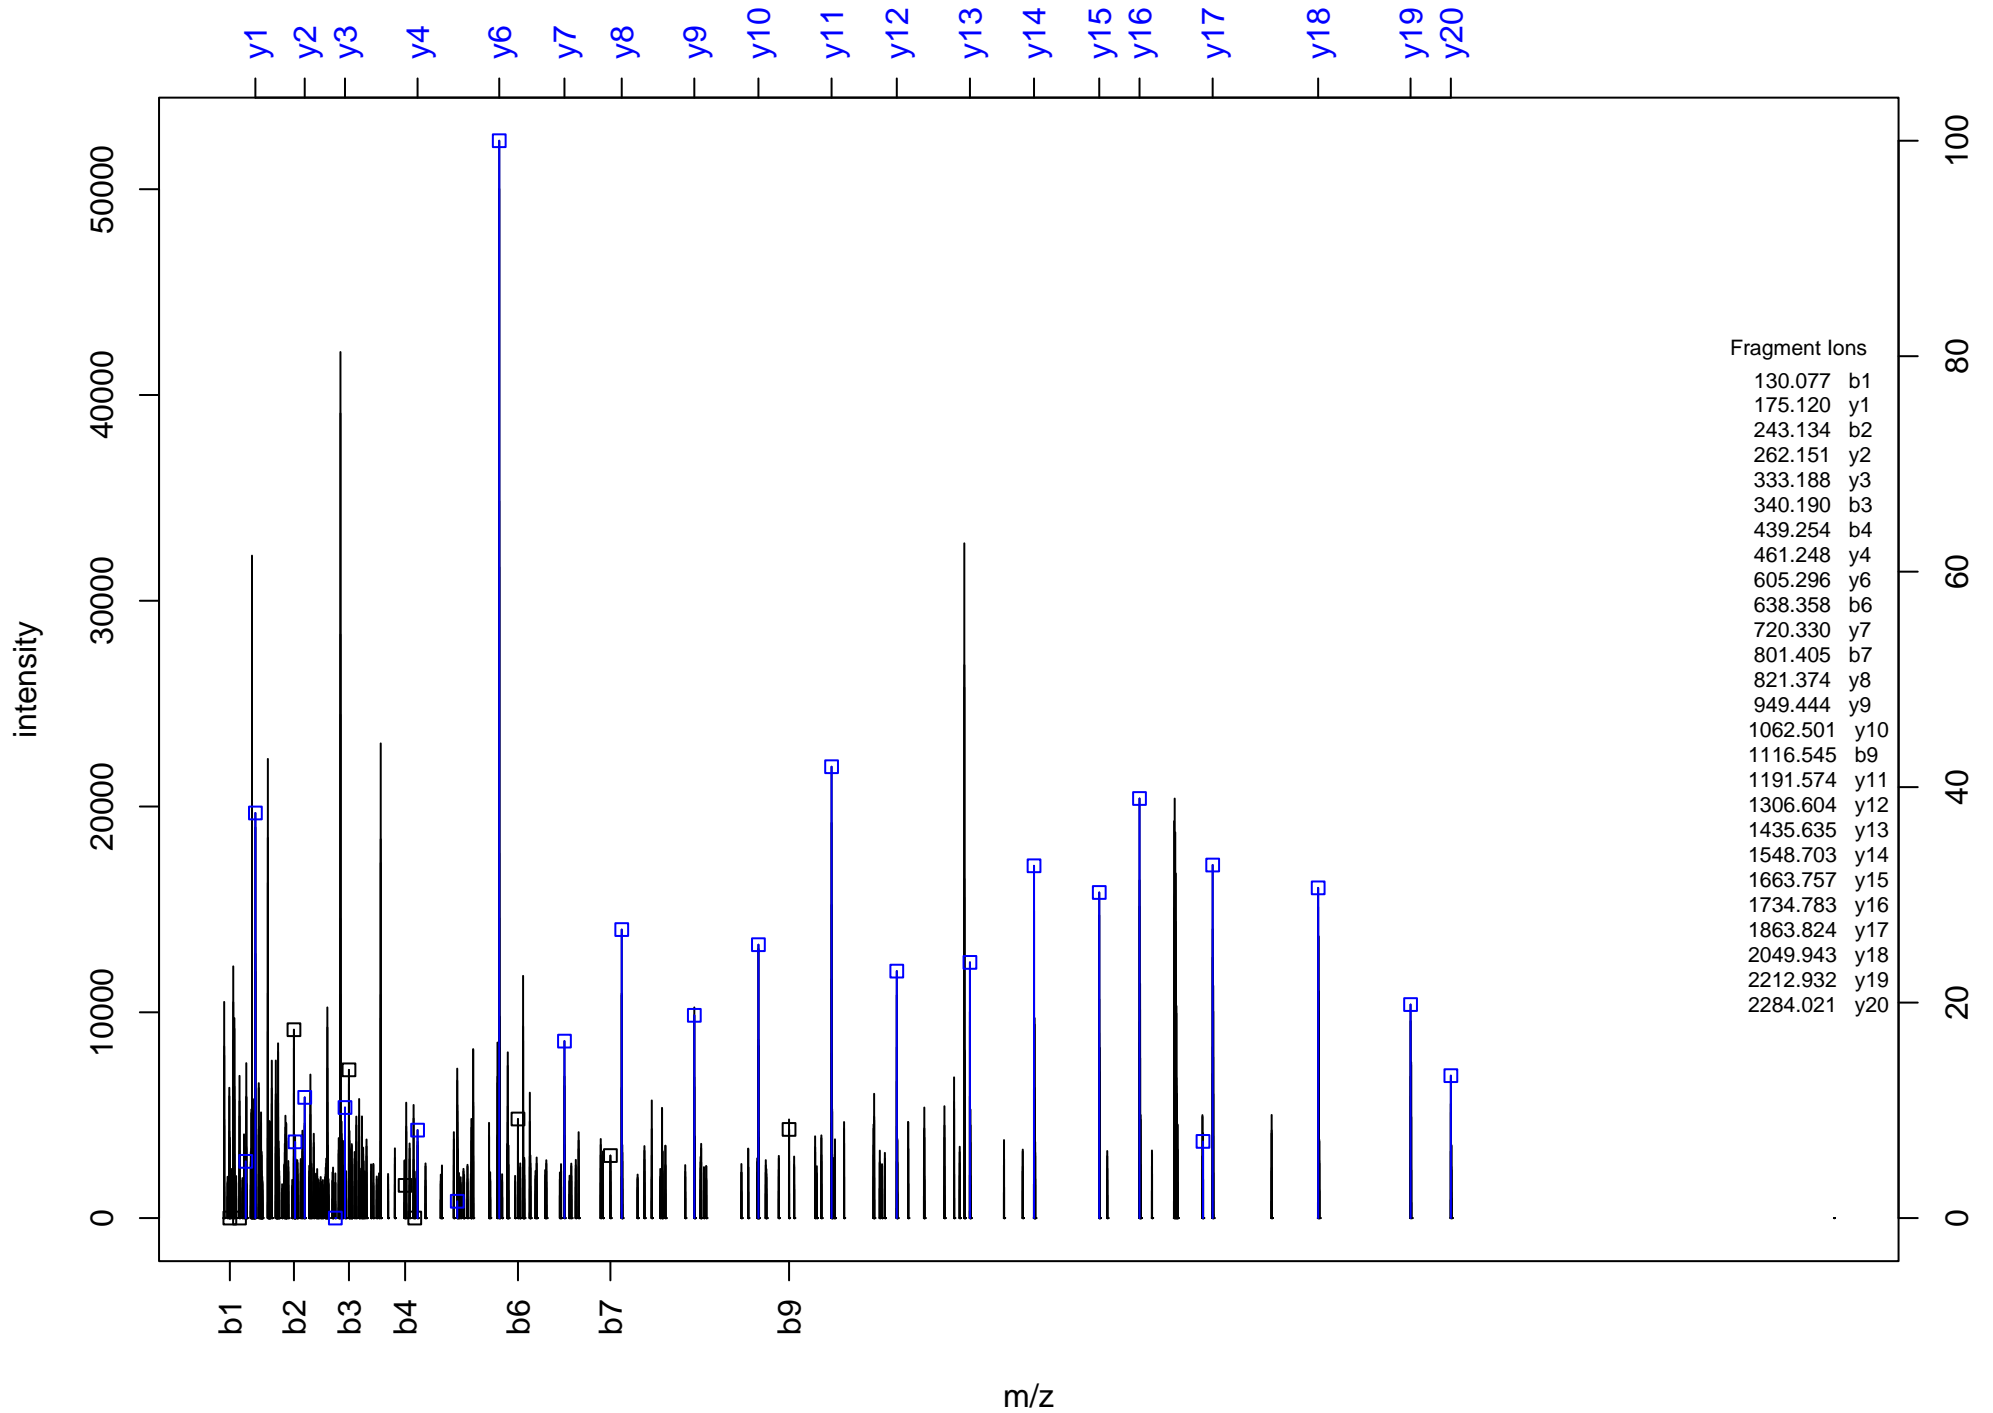

# LLILVNPFGGR

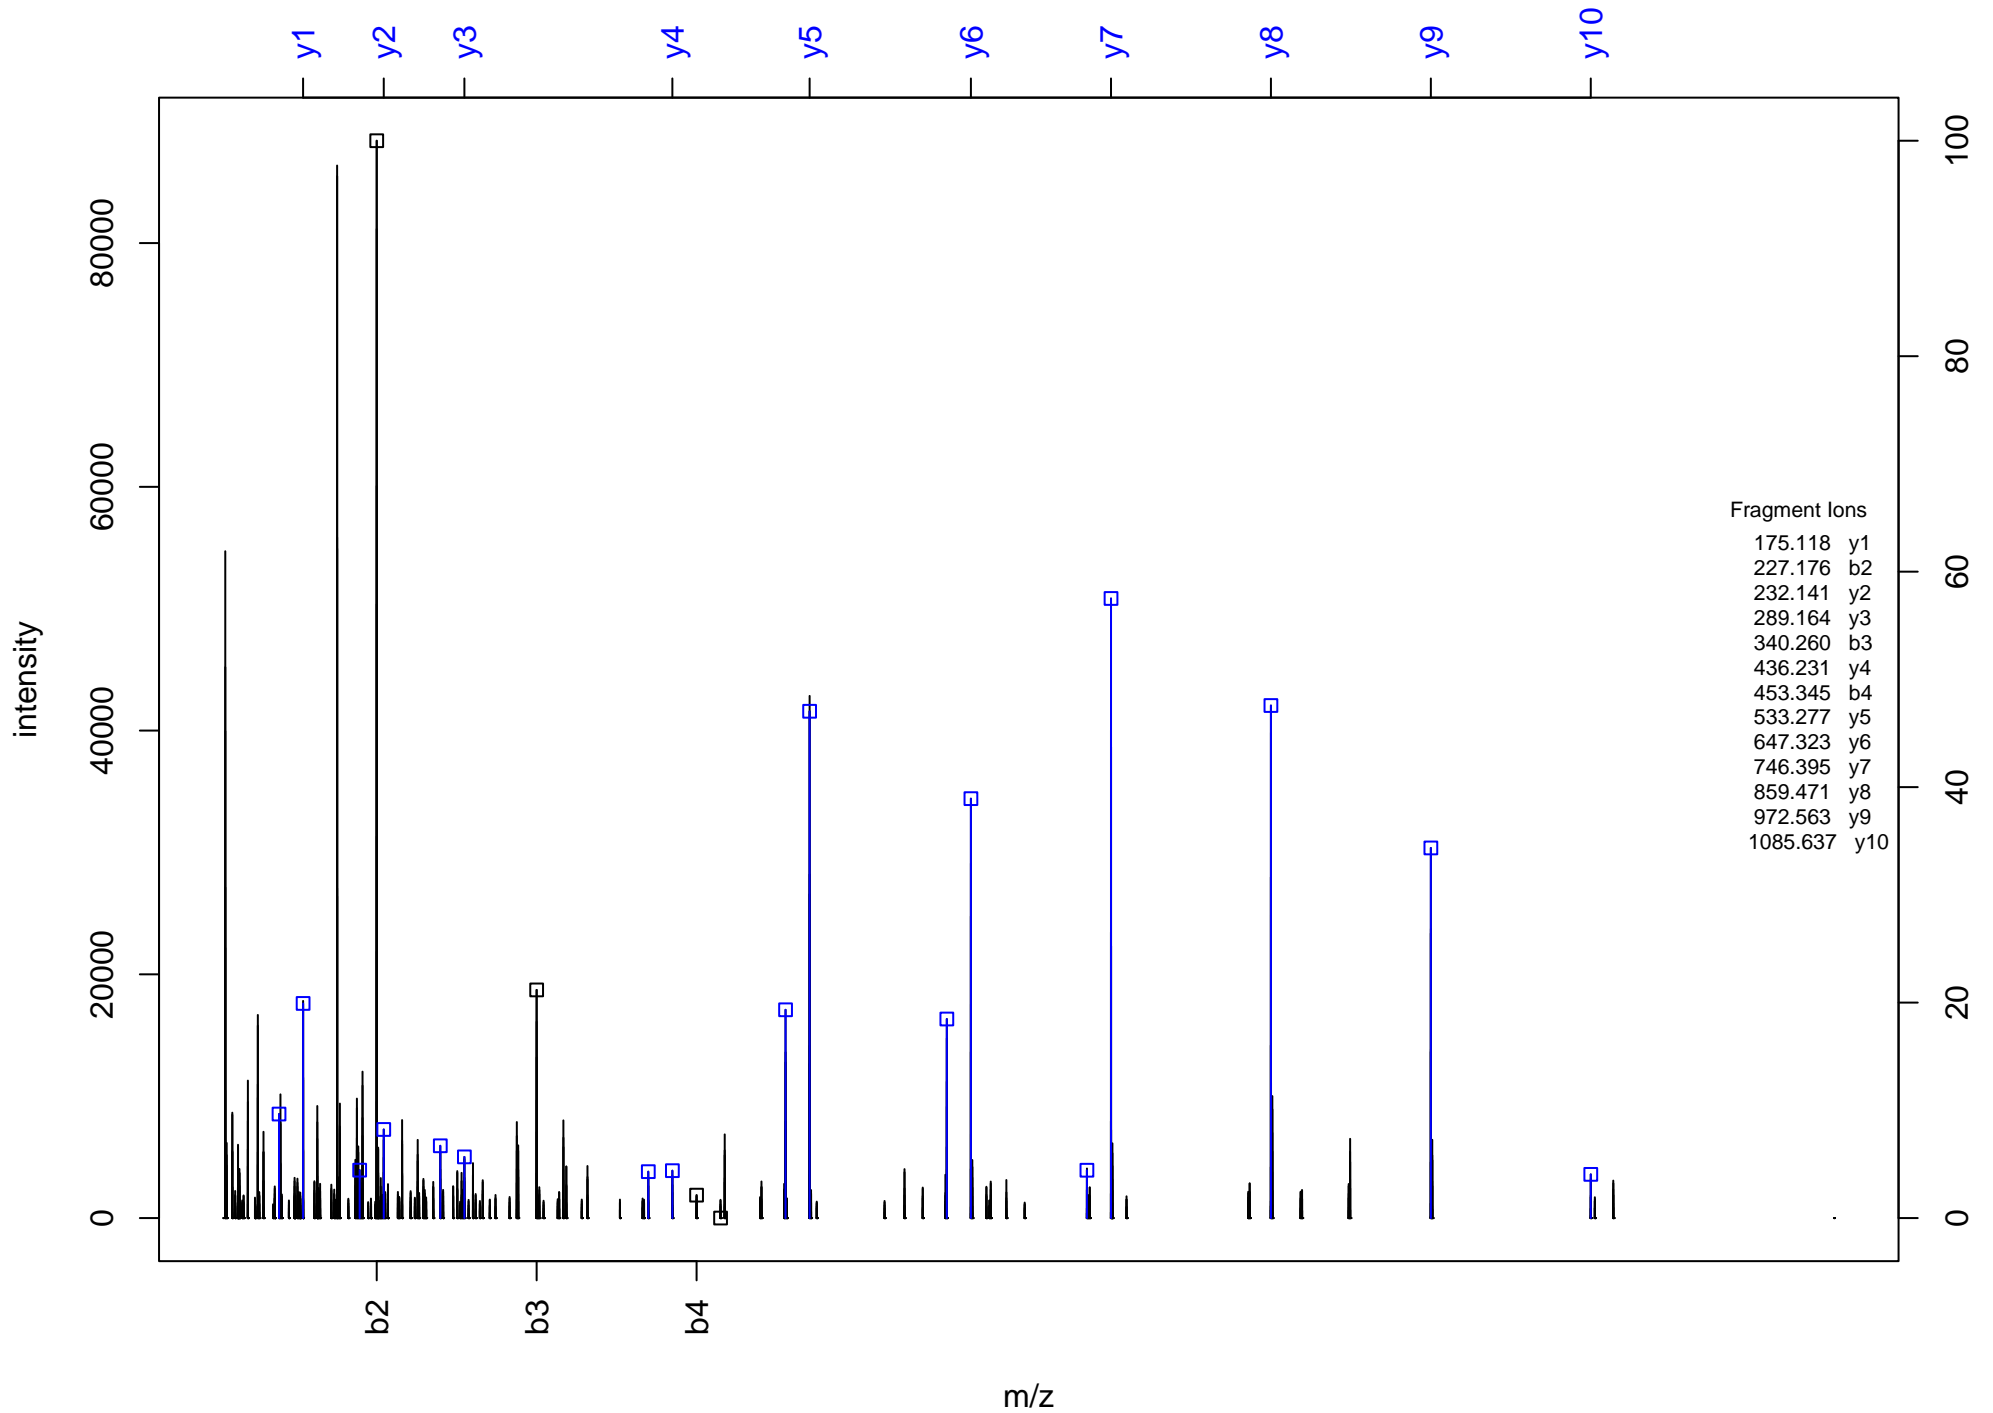

# FLDEDFVFDIYR

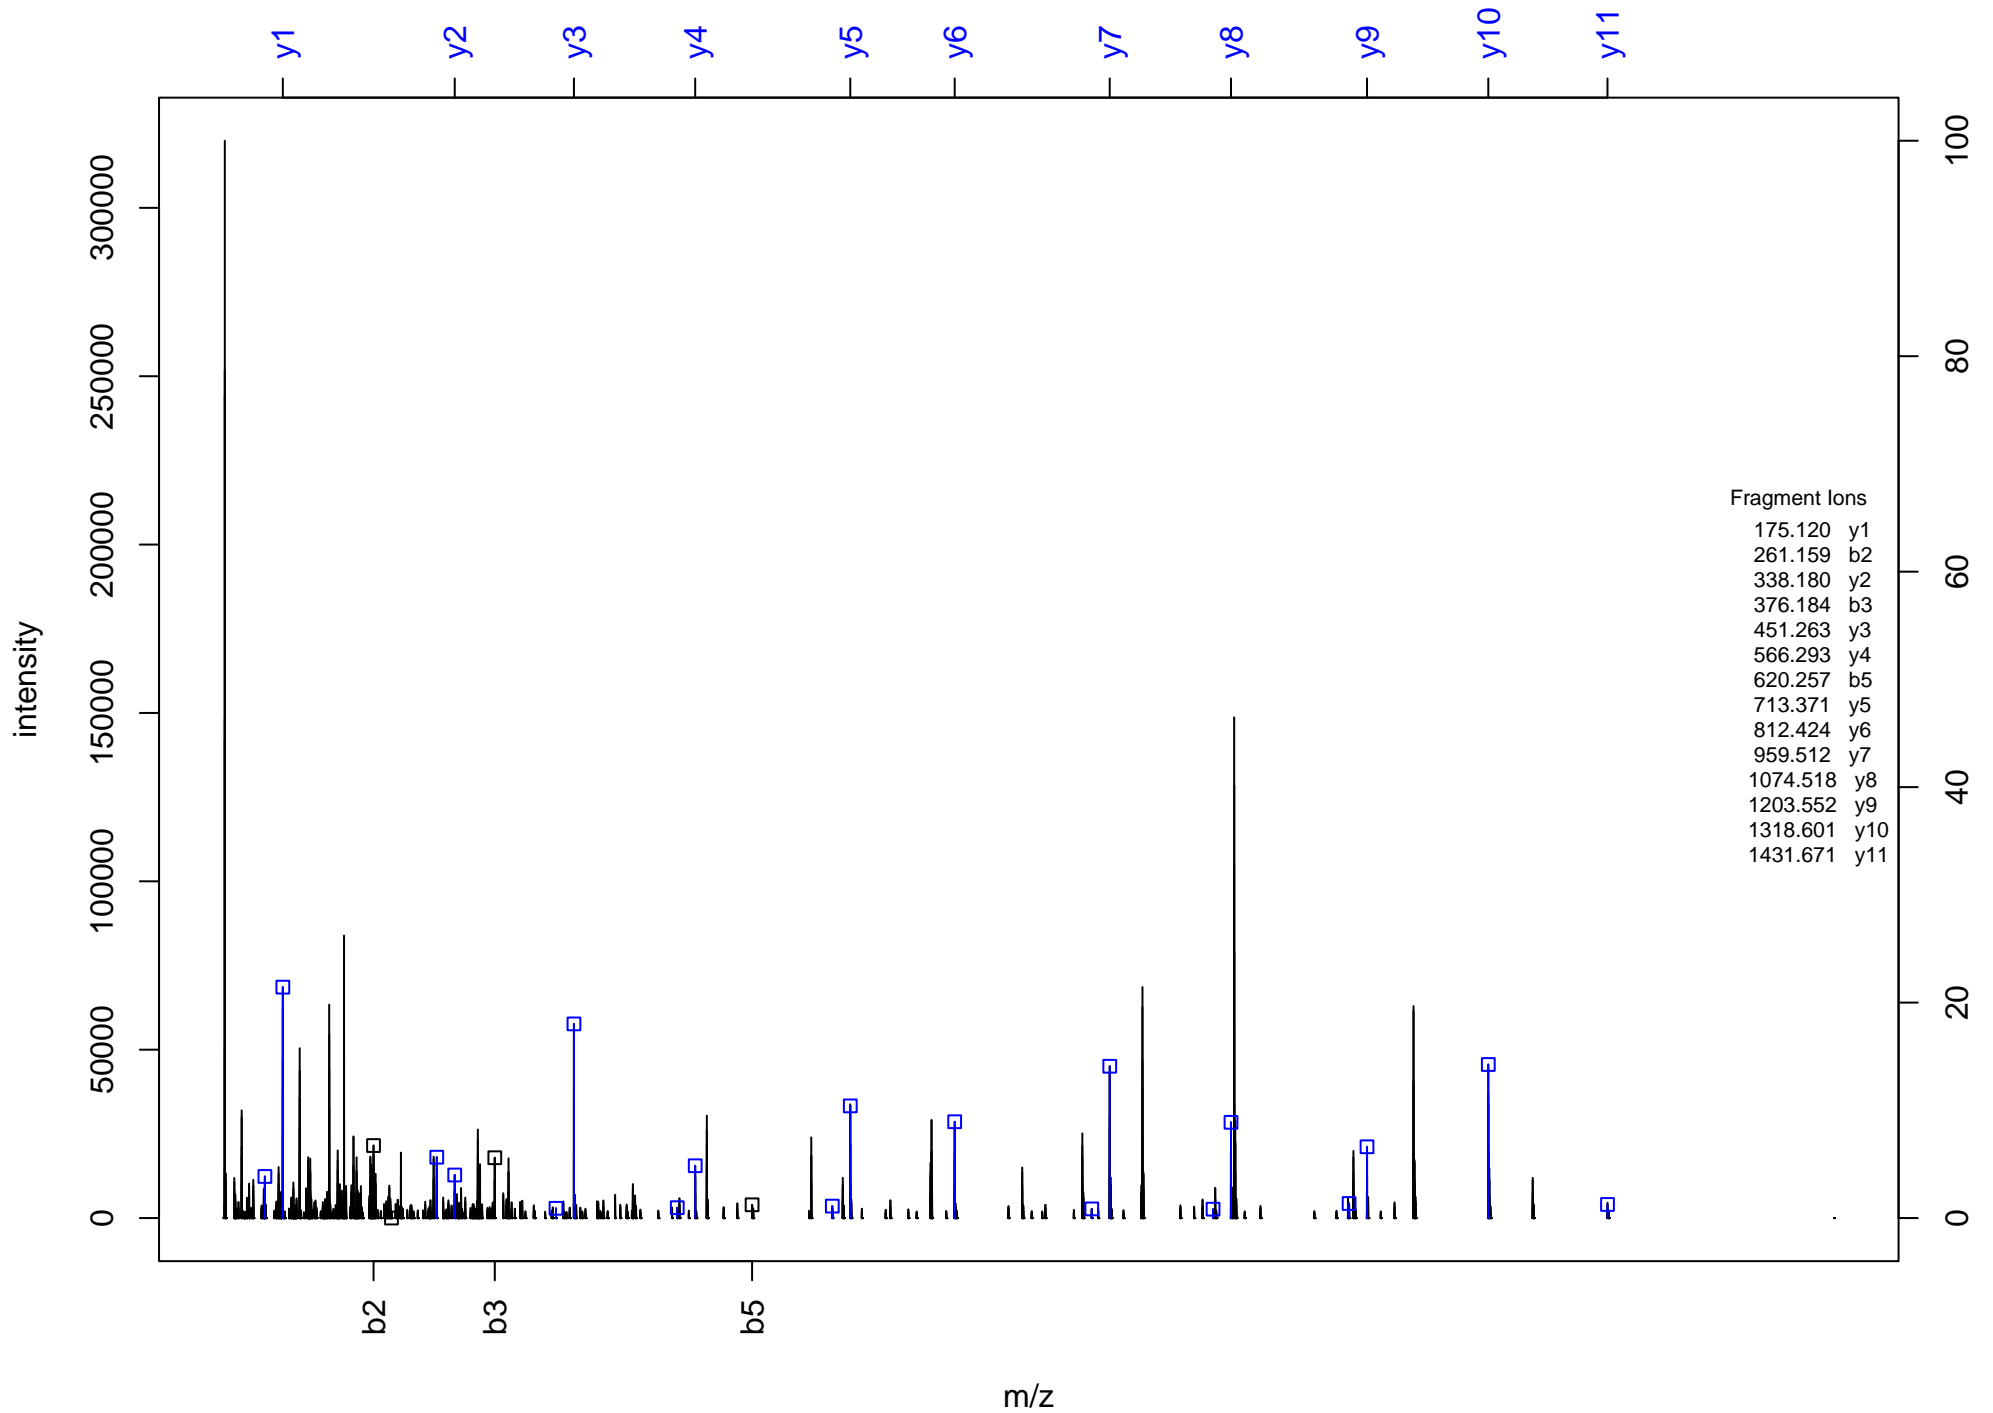

# ELFDFVTDPSITADNMDAYLEK

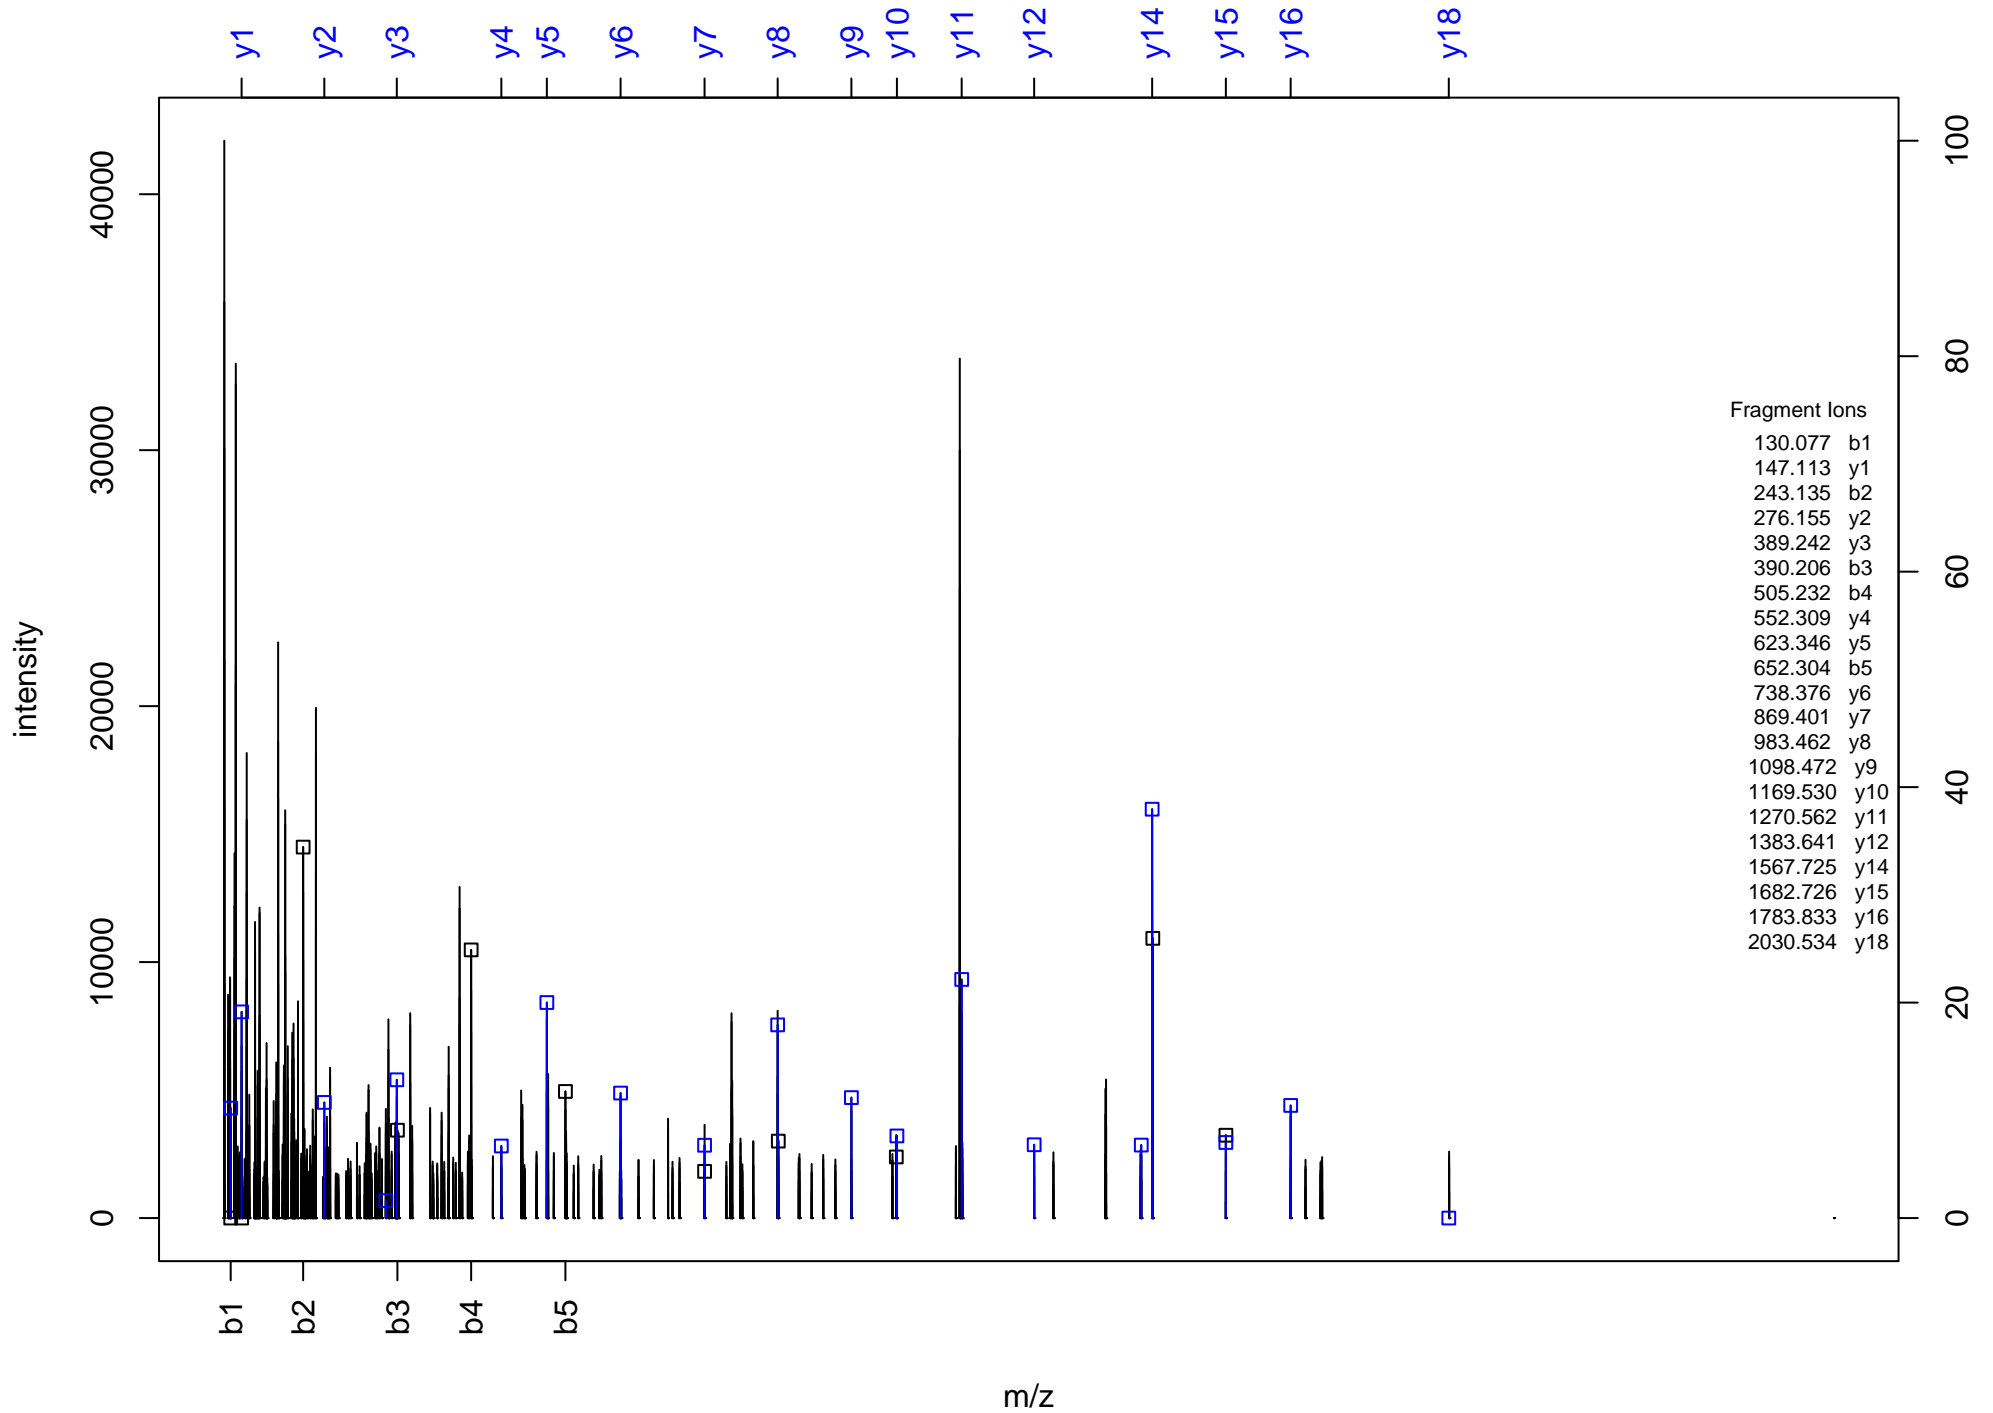

# (Ac)MNPEVNCQ<sup>N</sup><sup>N</sup>GATDRAR

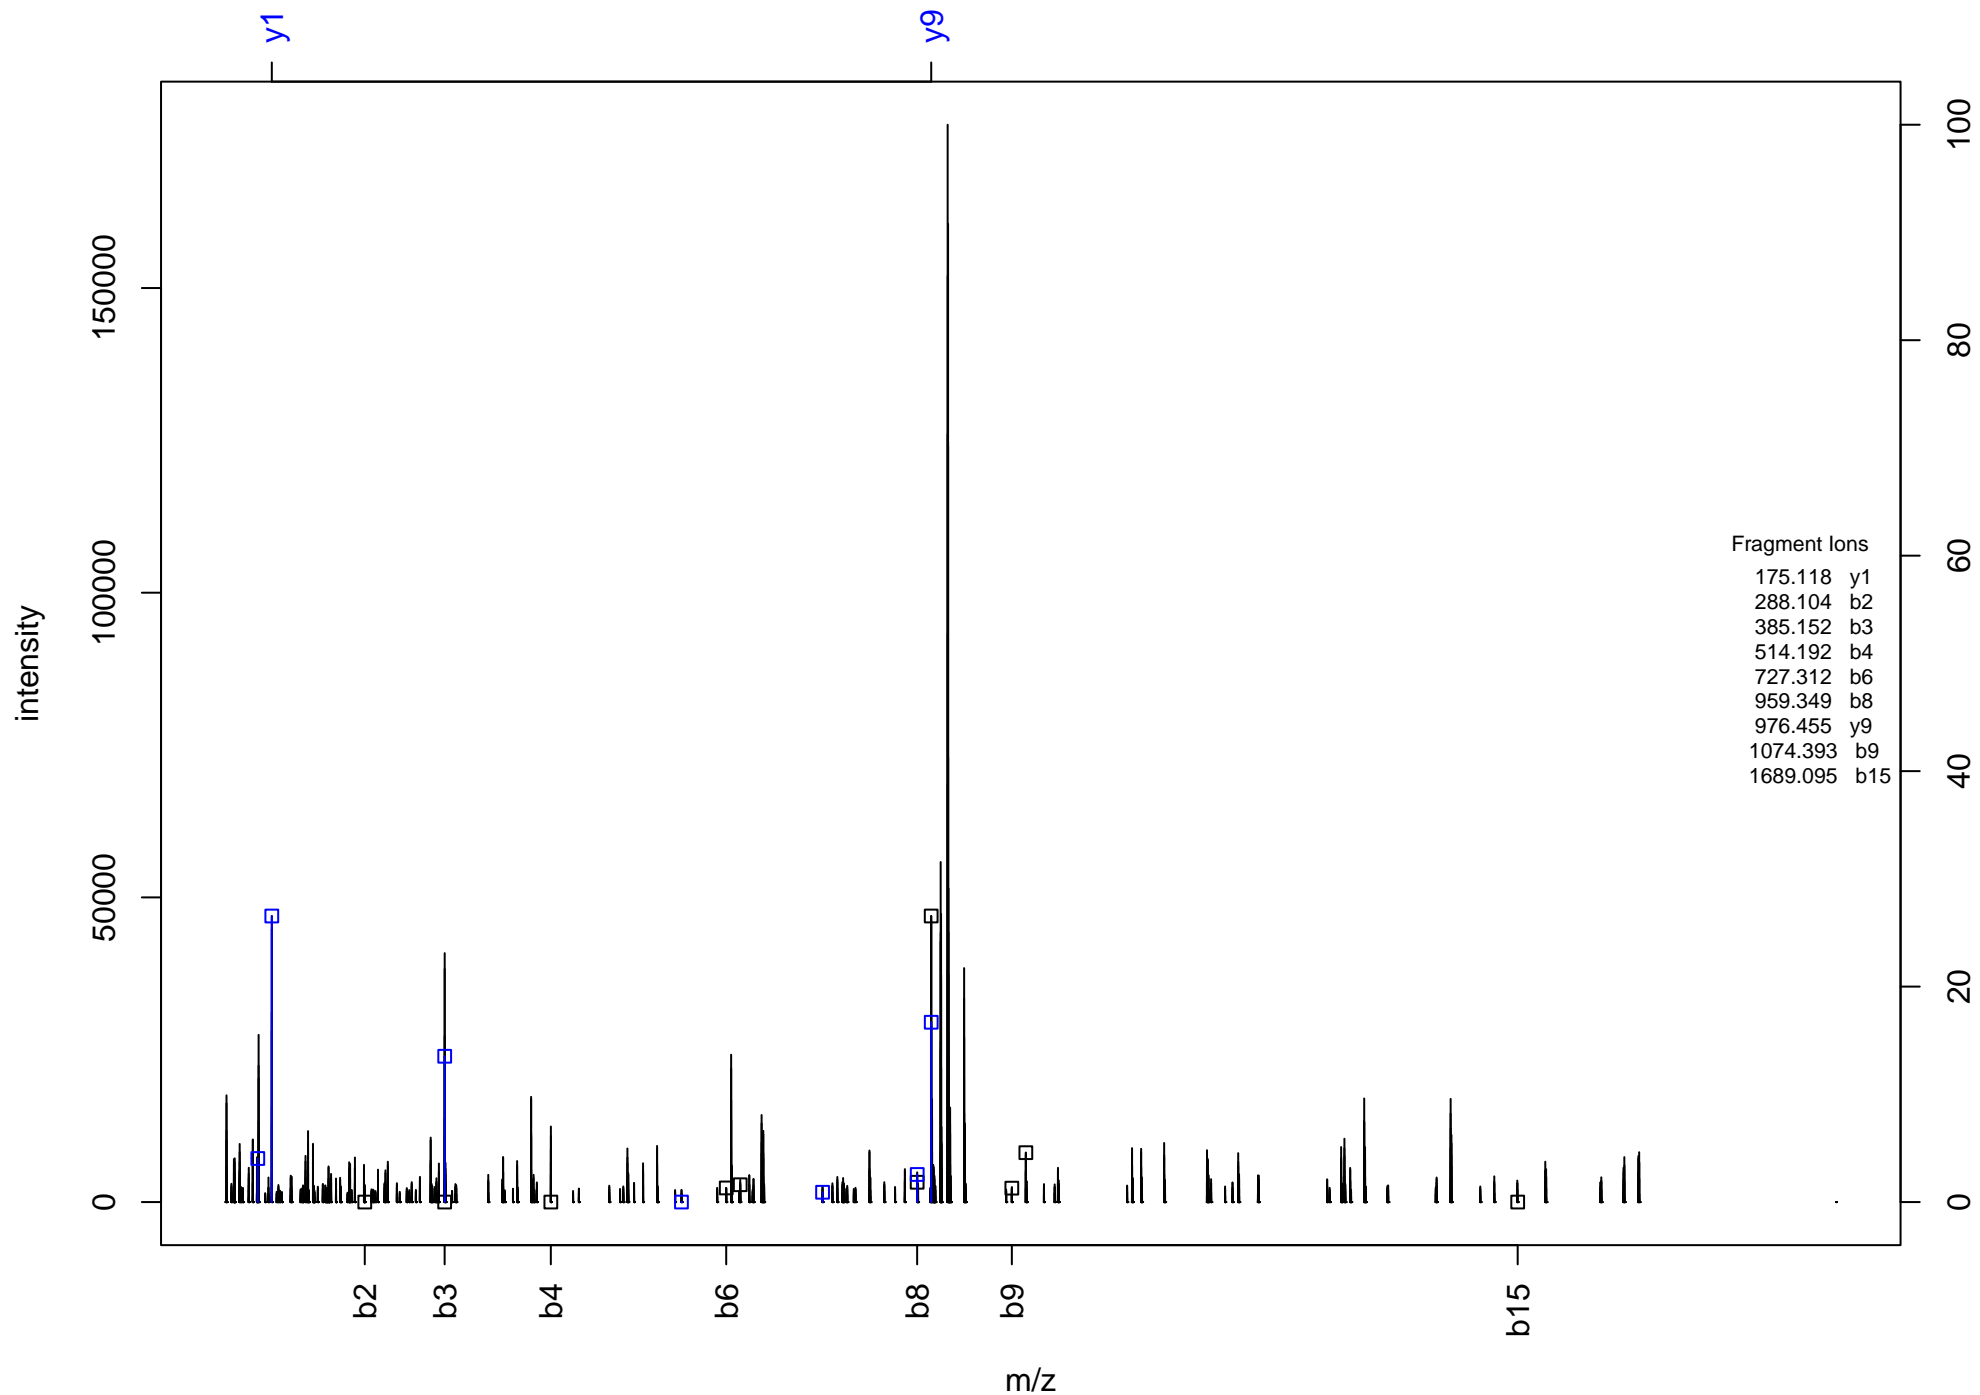

# PGLAAASPAPPEAQEK

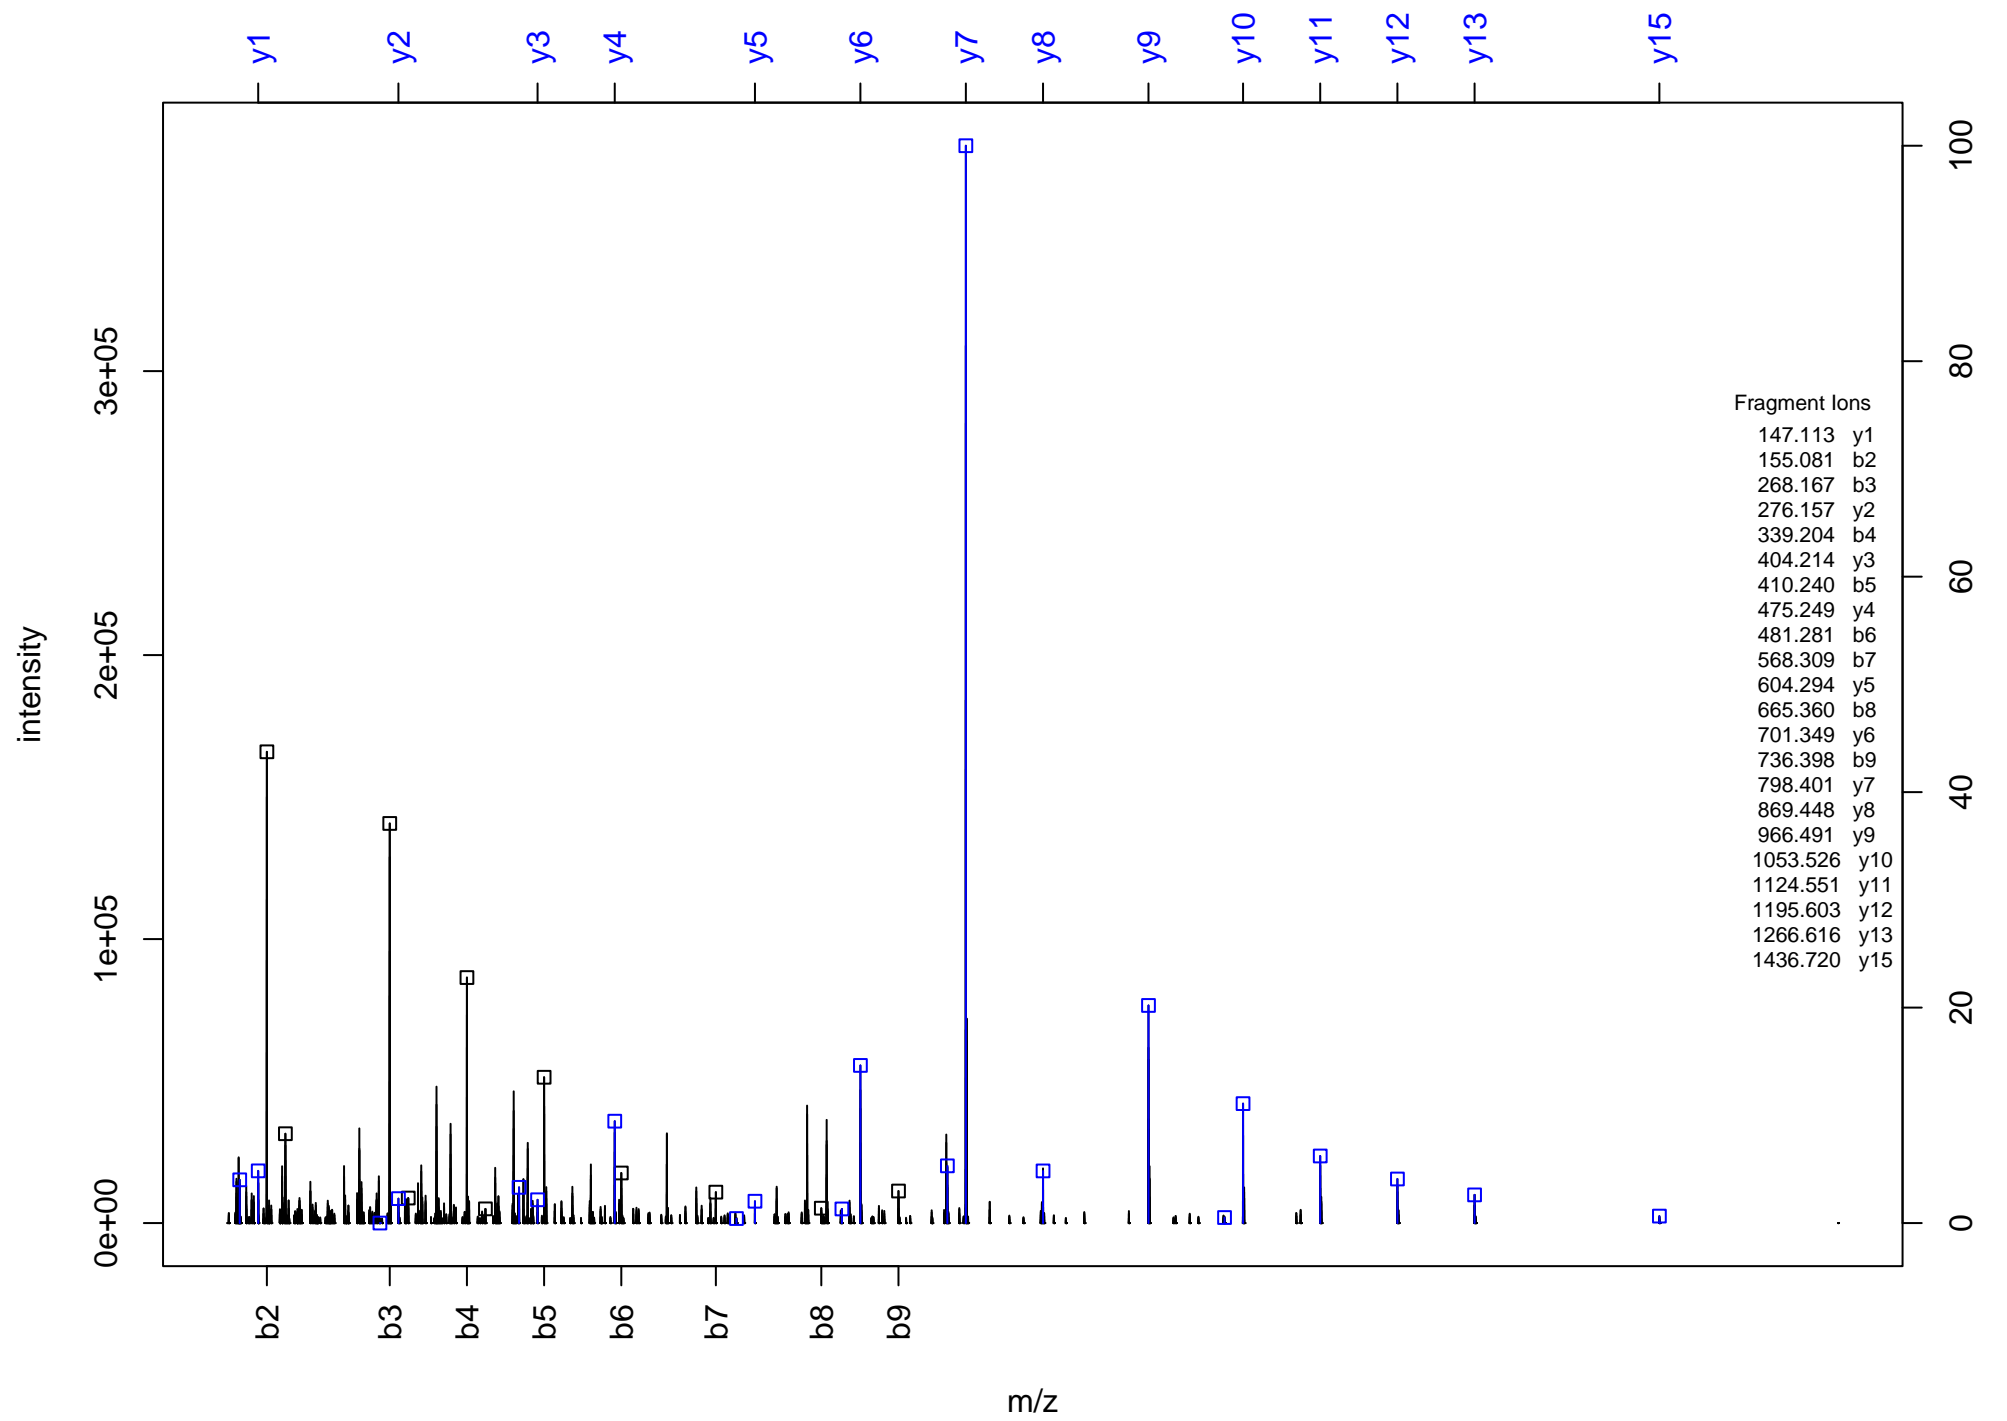

# (Ac)MSN<sup>N</sup>MAKIAEAR

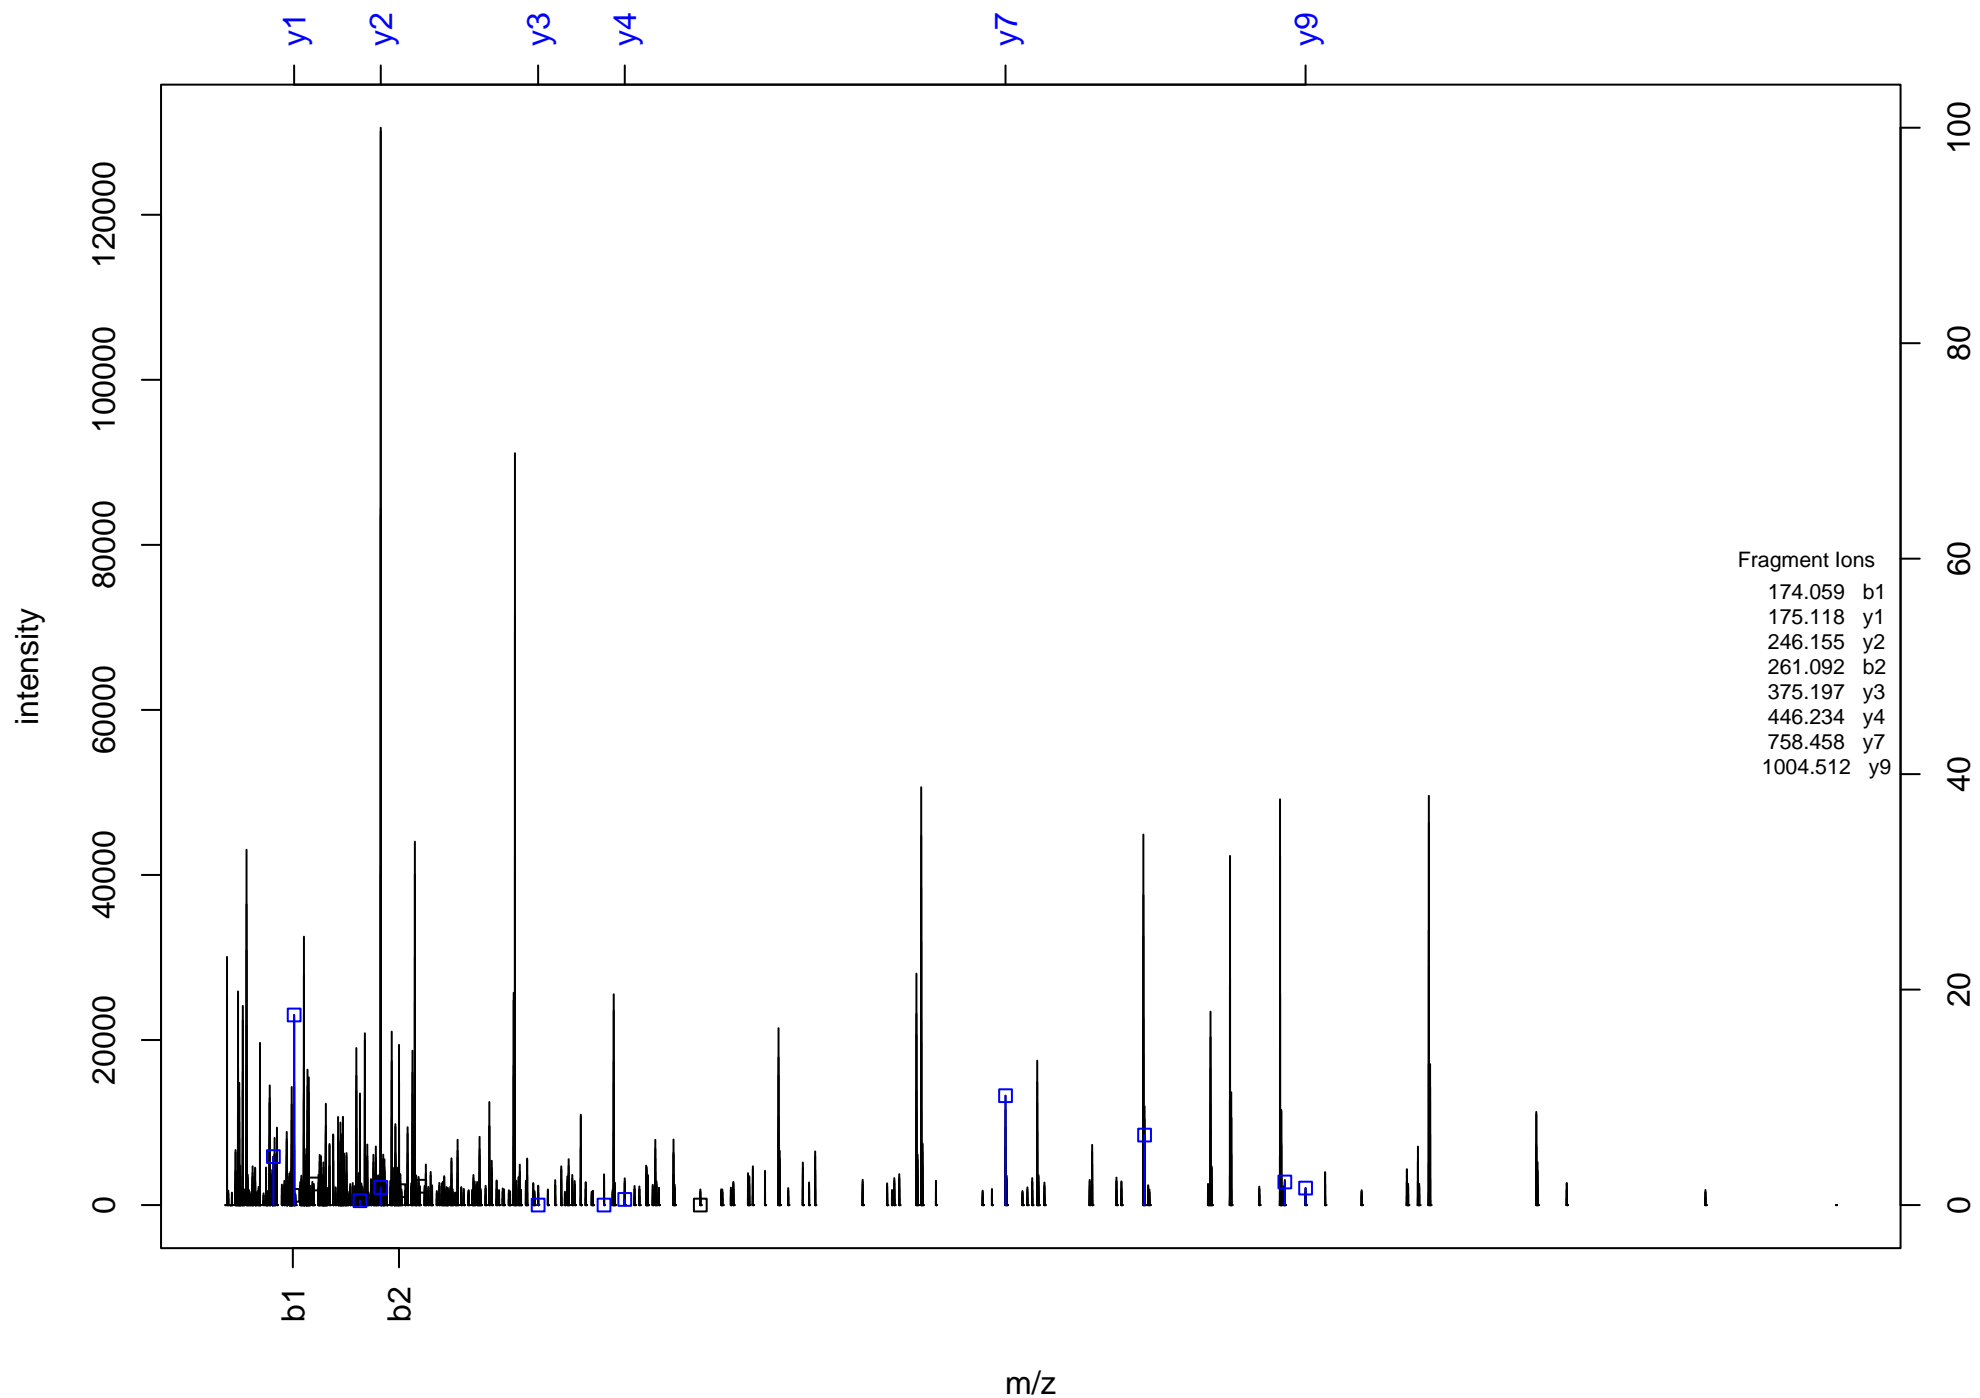

# (Ac)ASLKAFN<sup>+</sup>SSKSR

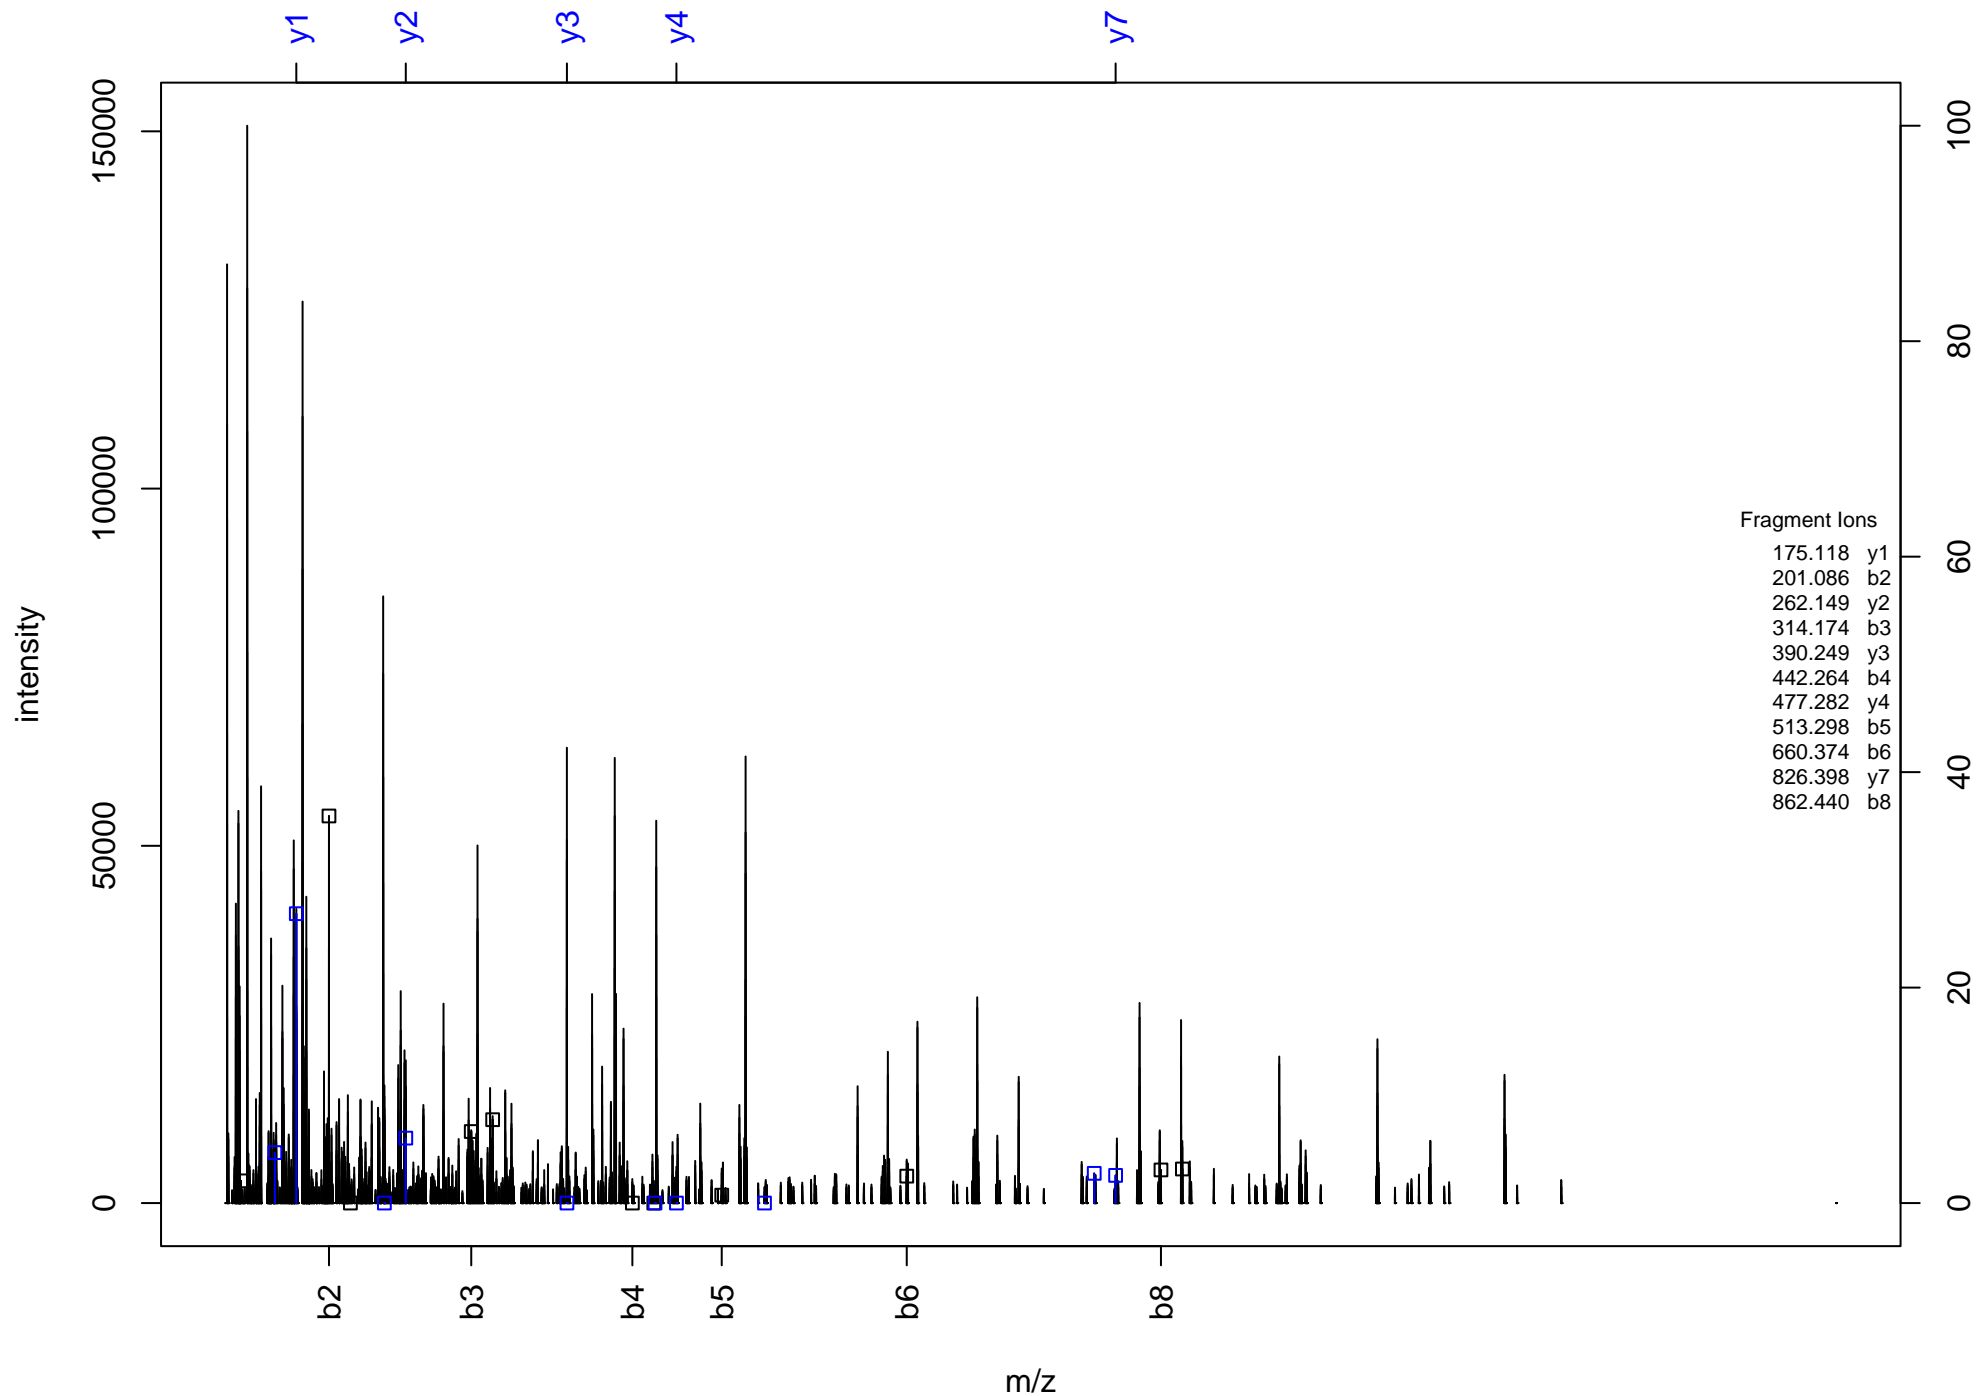



# LN^FSTSPEIFR

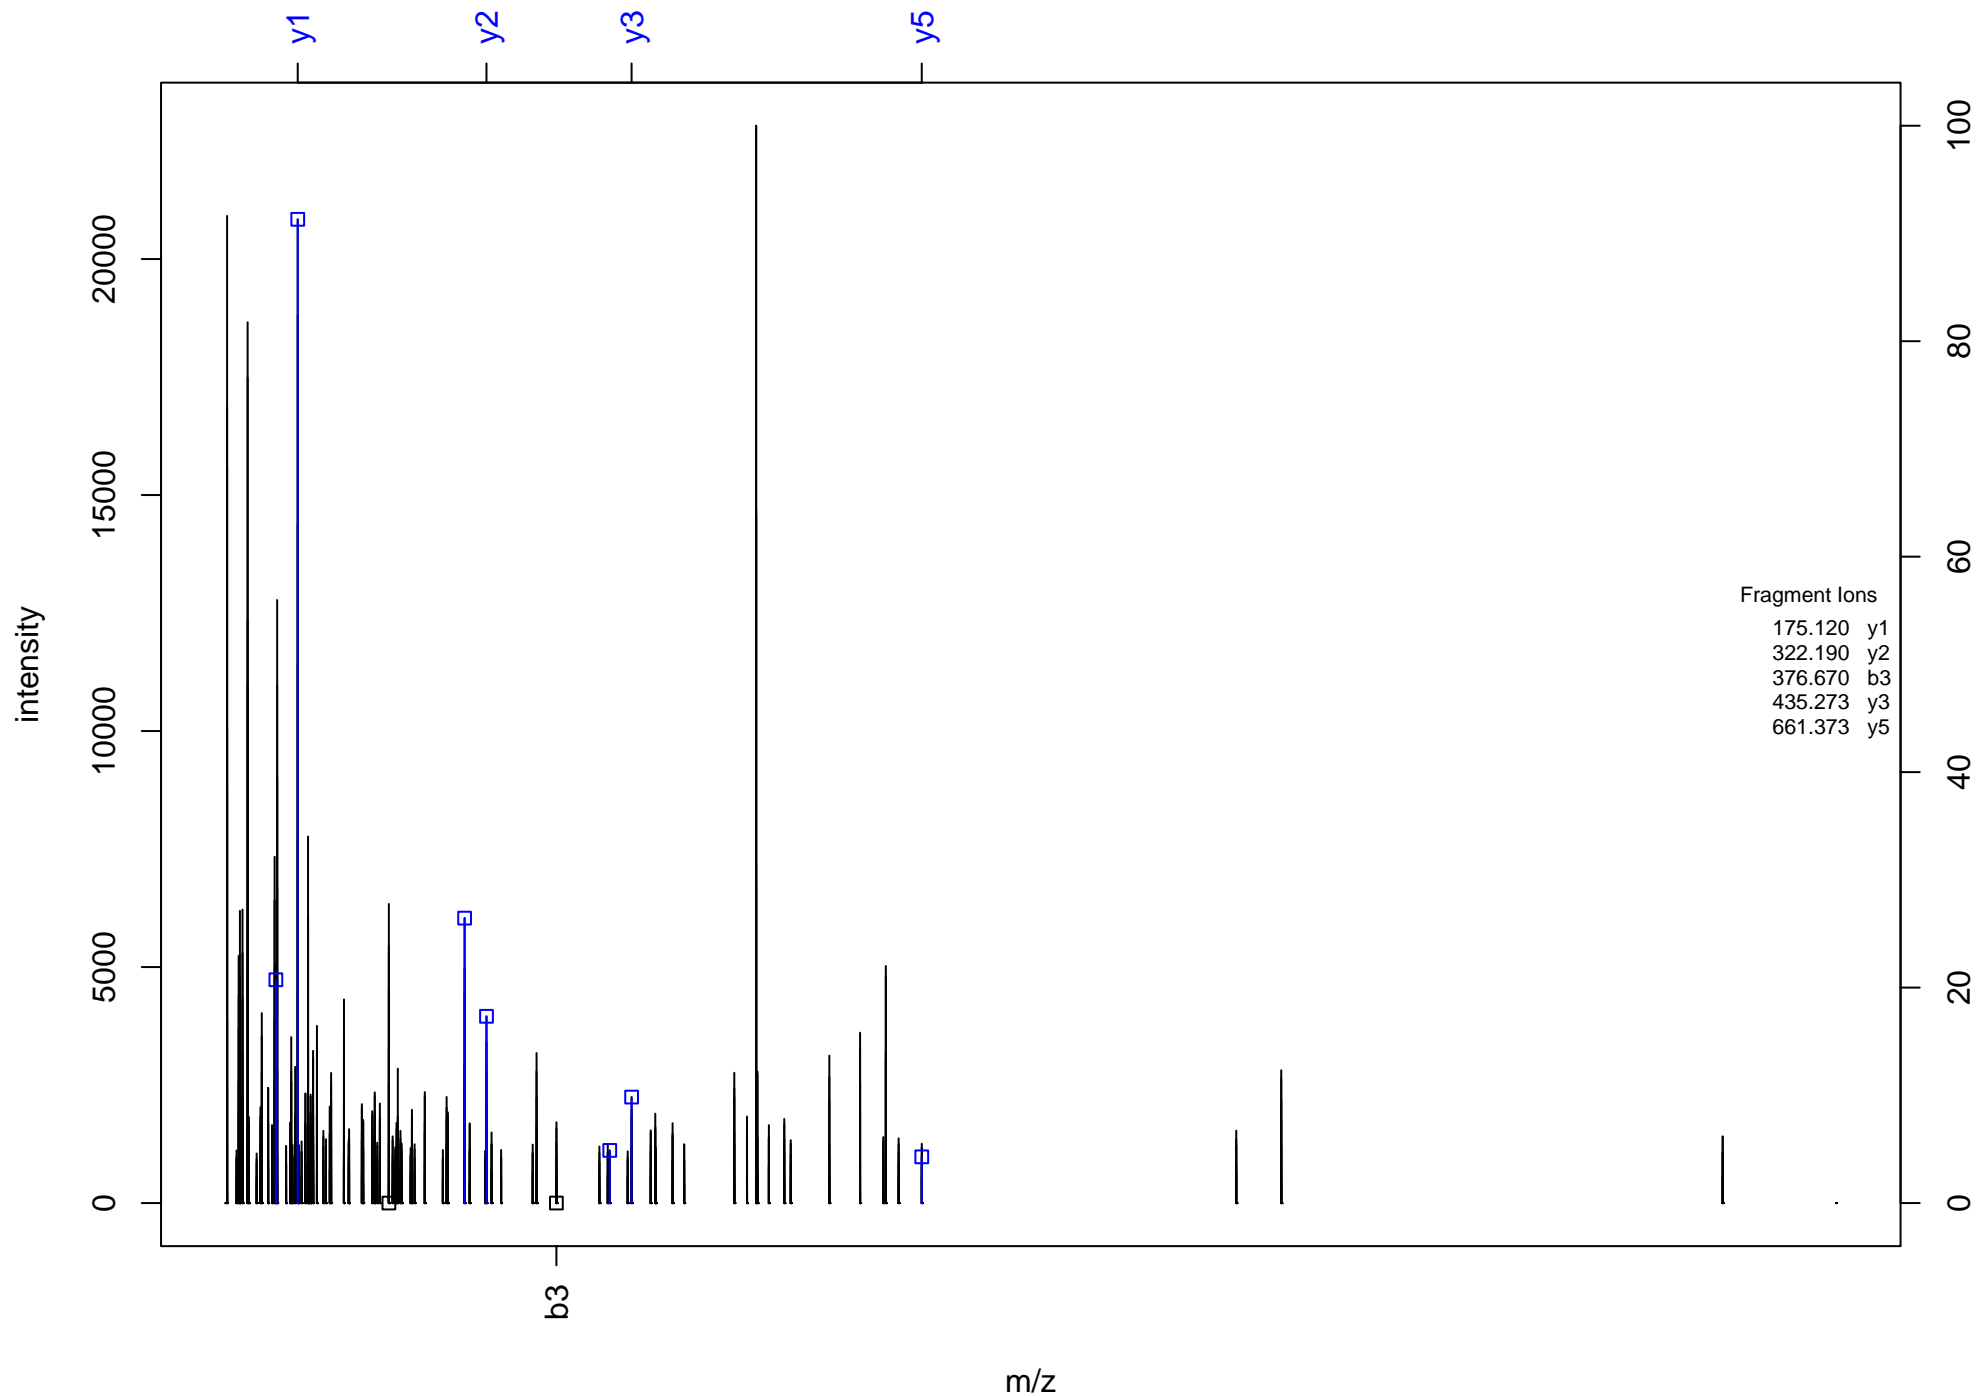

# KEN^ELYESLMN^IAN^R

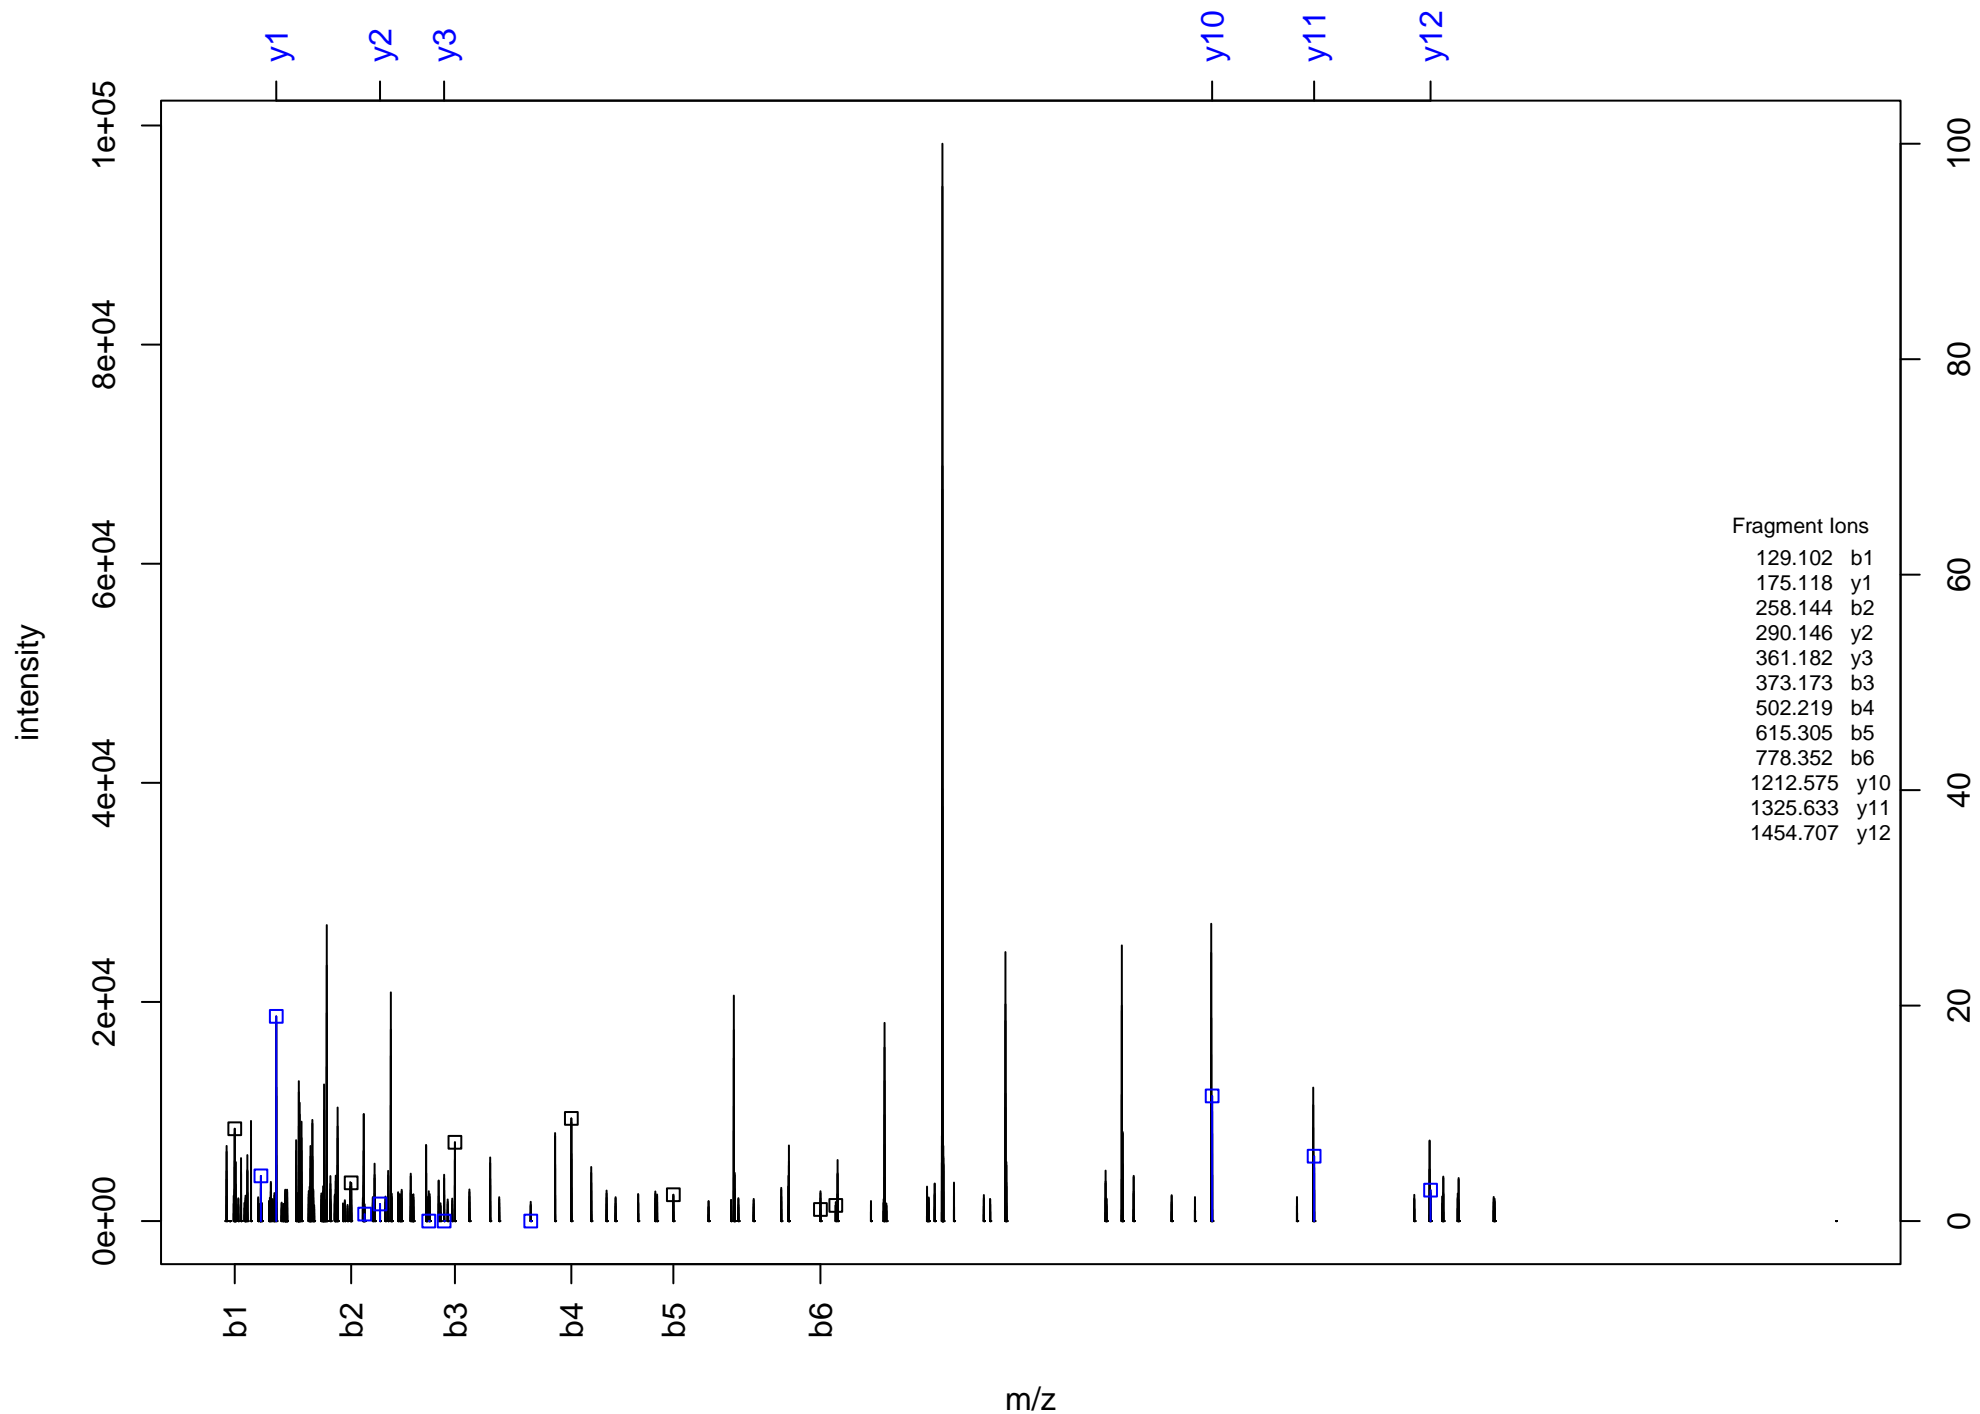

# AEQDIATLEQSIQR

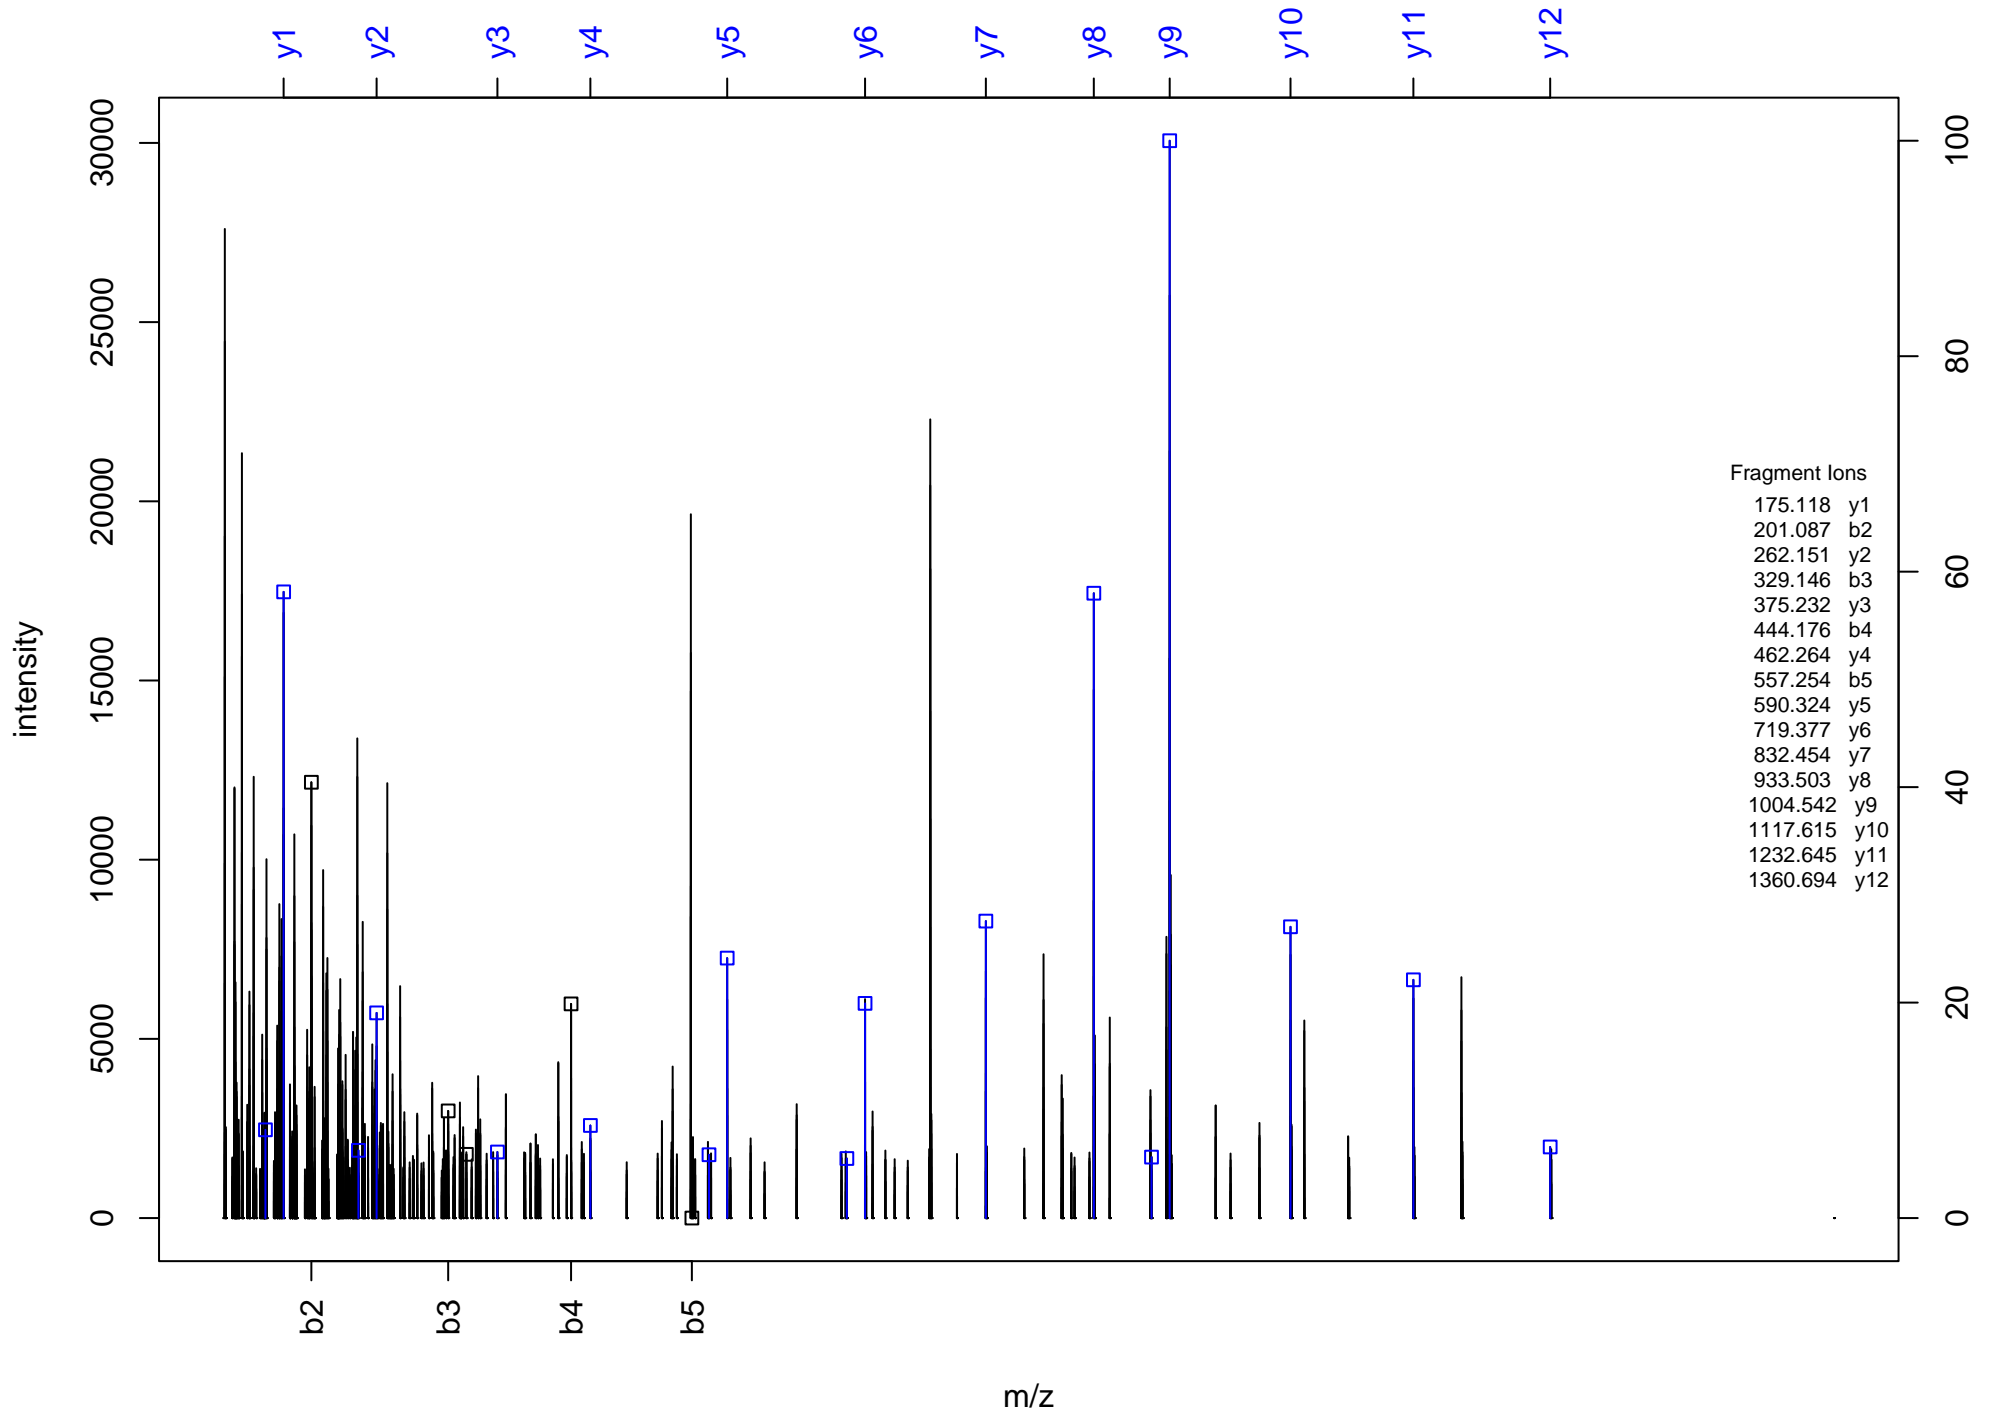

# IMITN^KFGPR

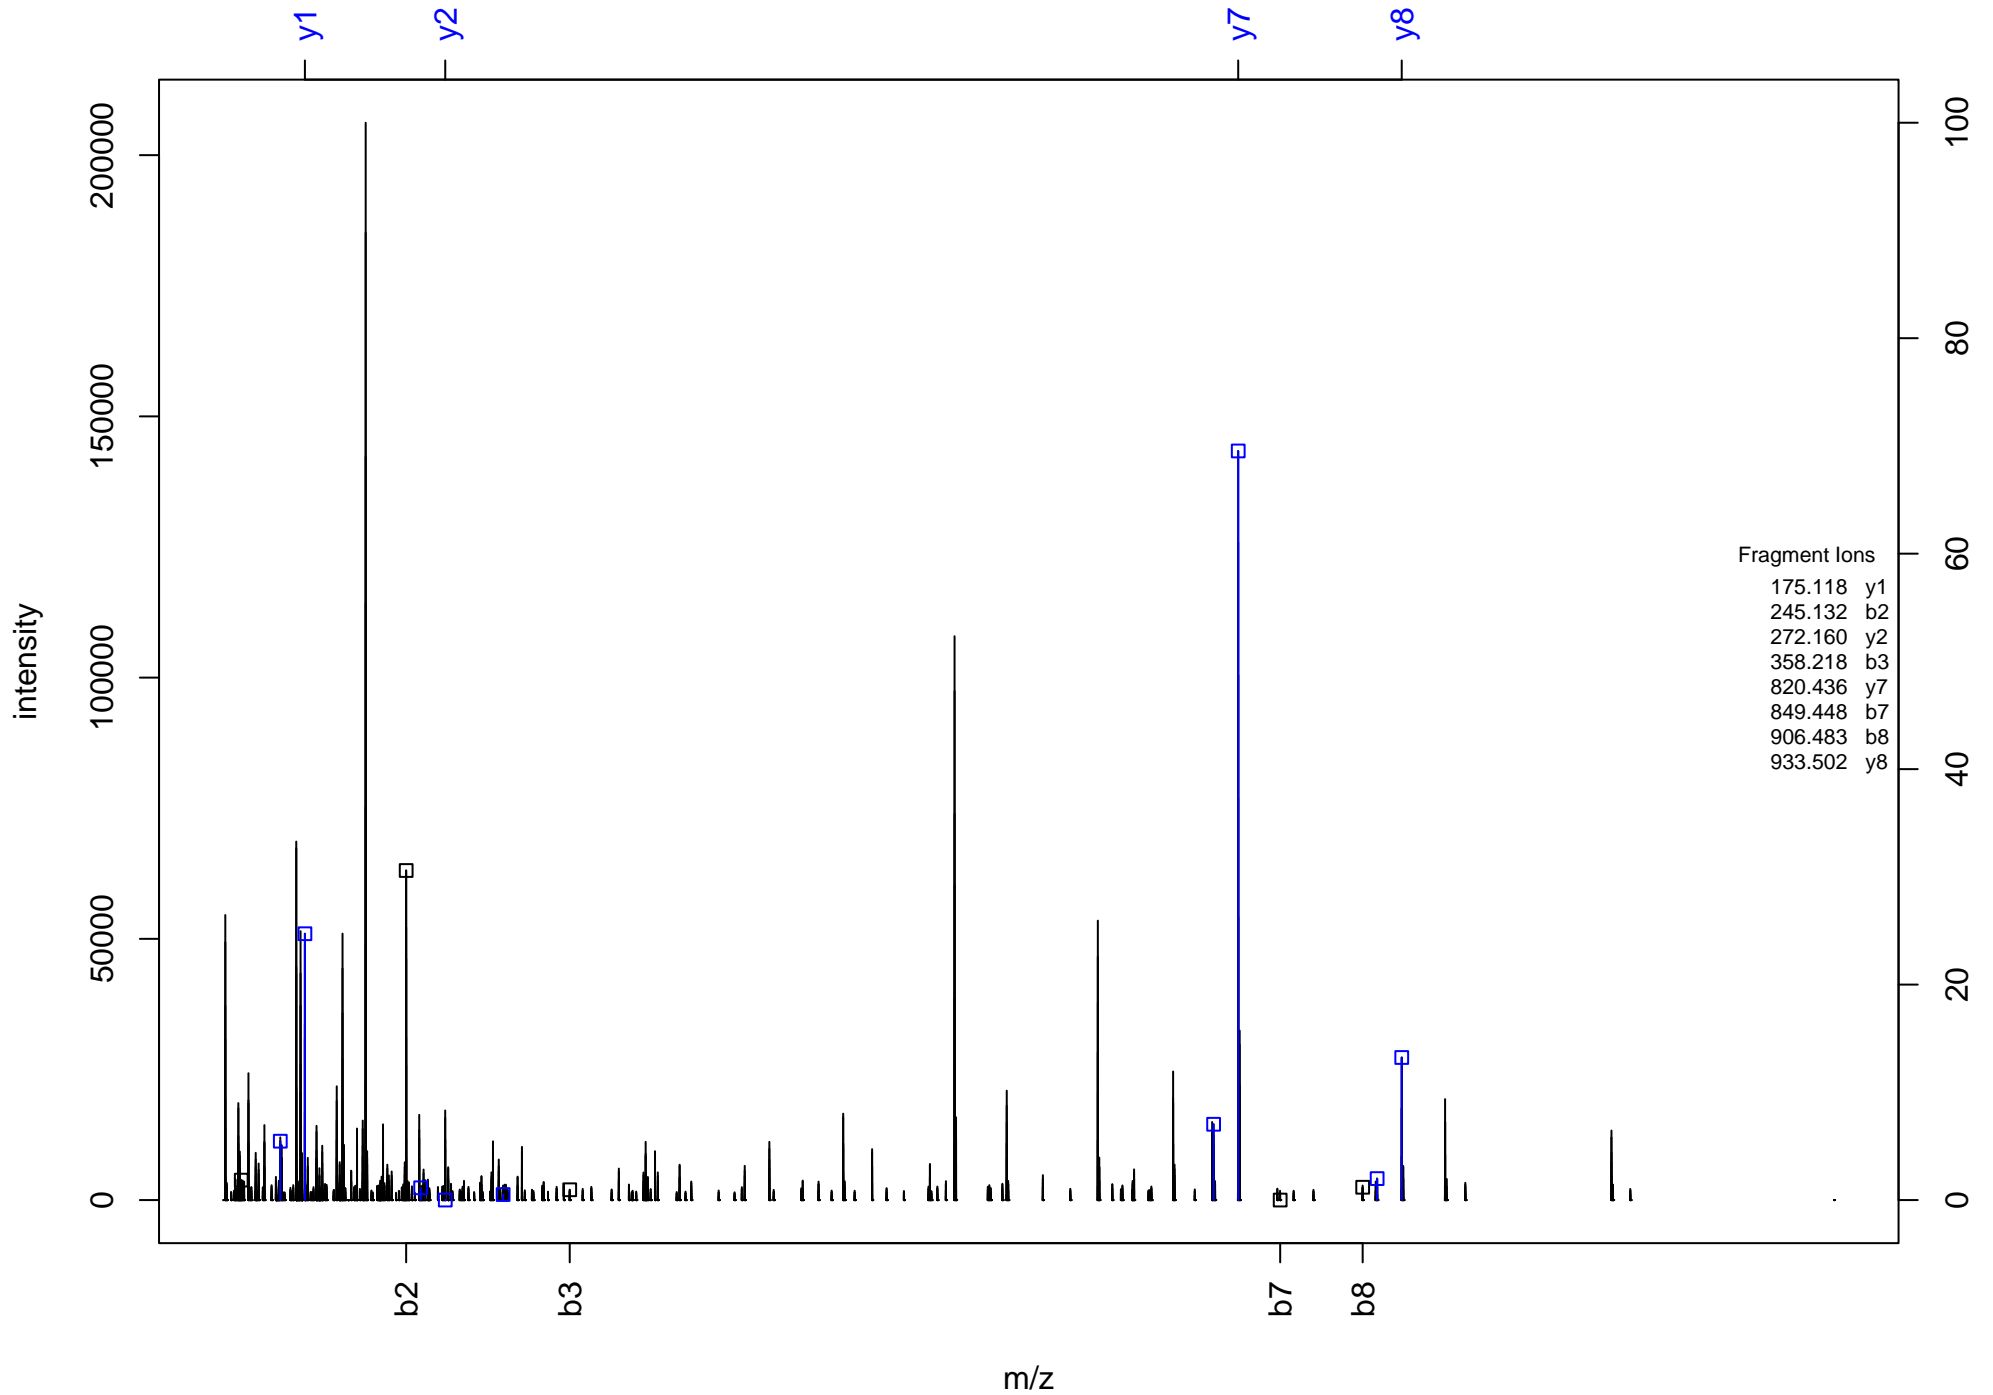

YEIQ^AQ^TLVDGRWQ^EFRTN^QIMQ^K

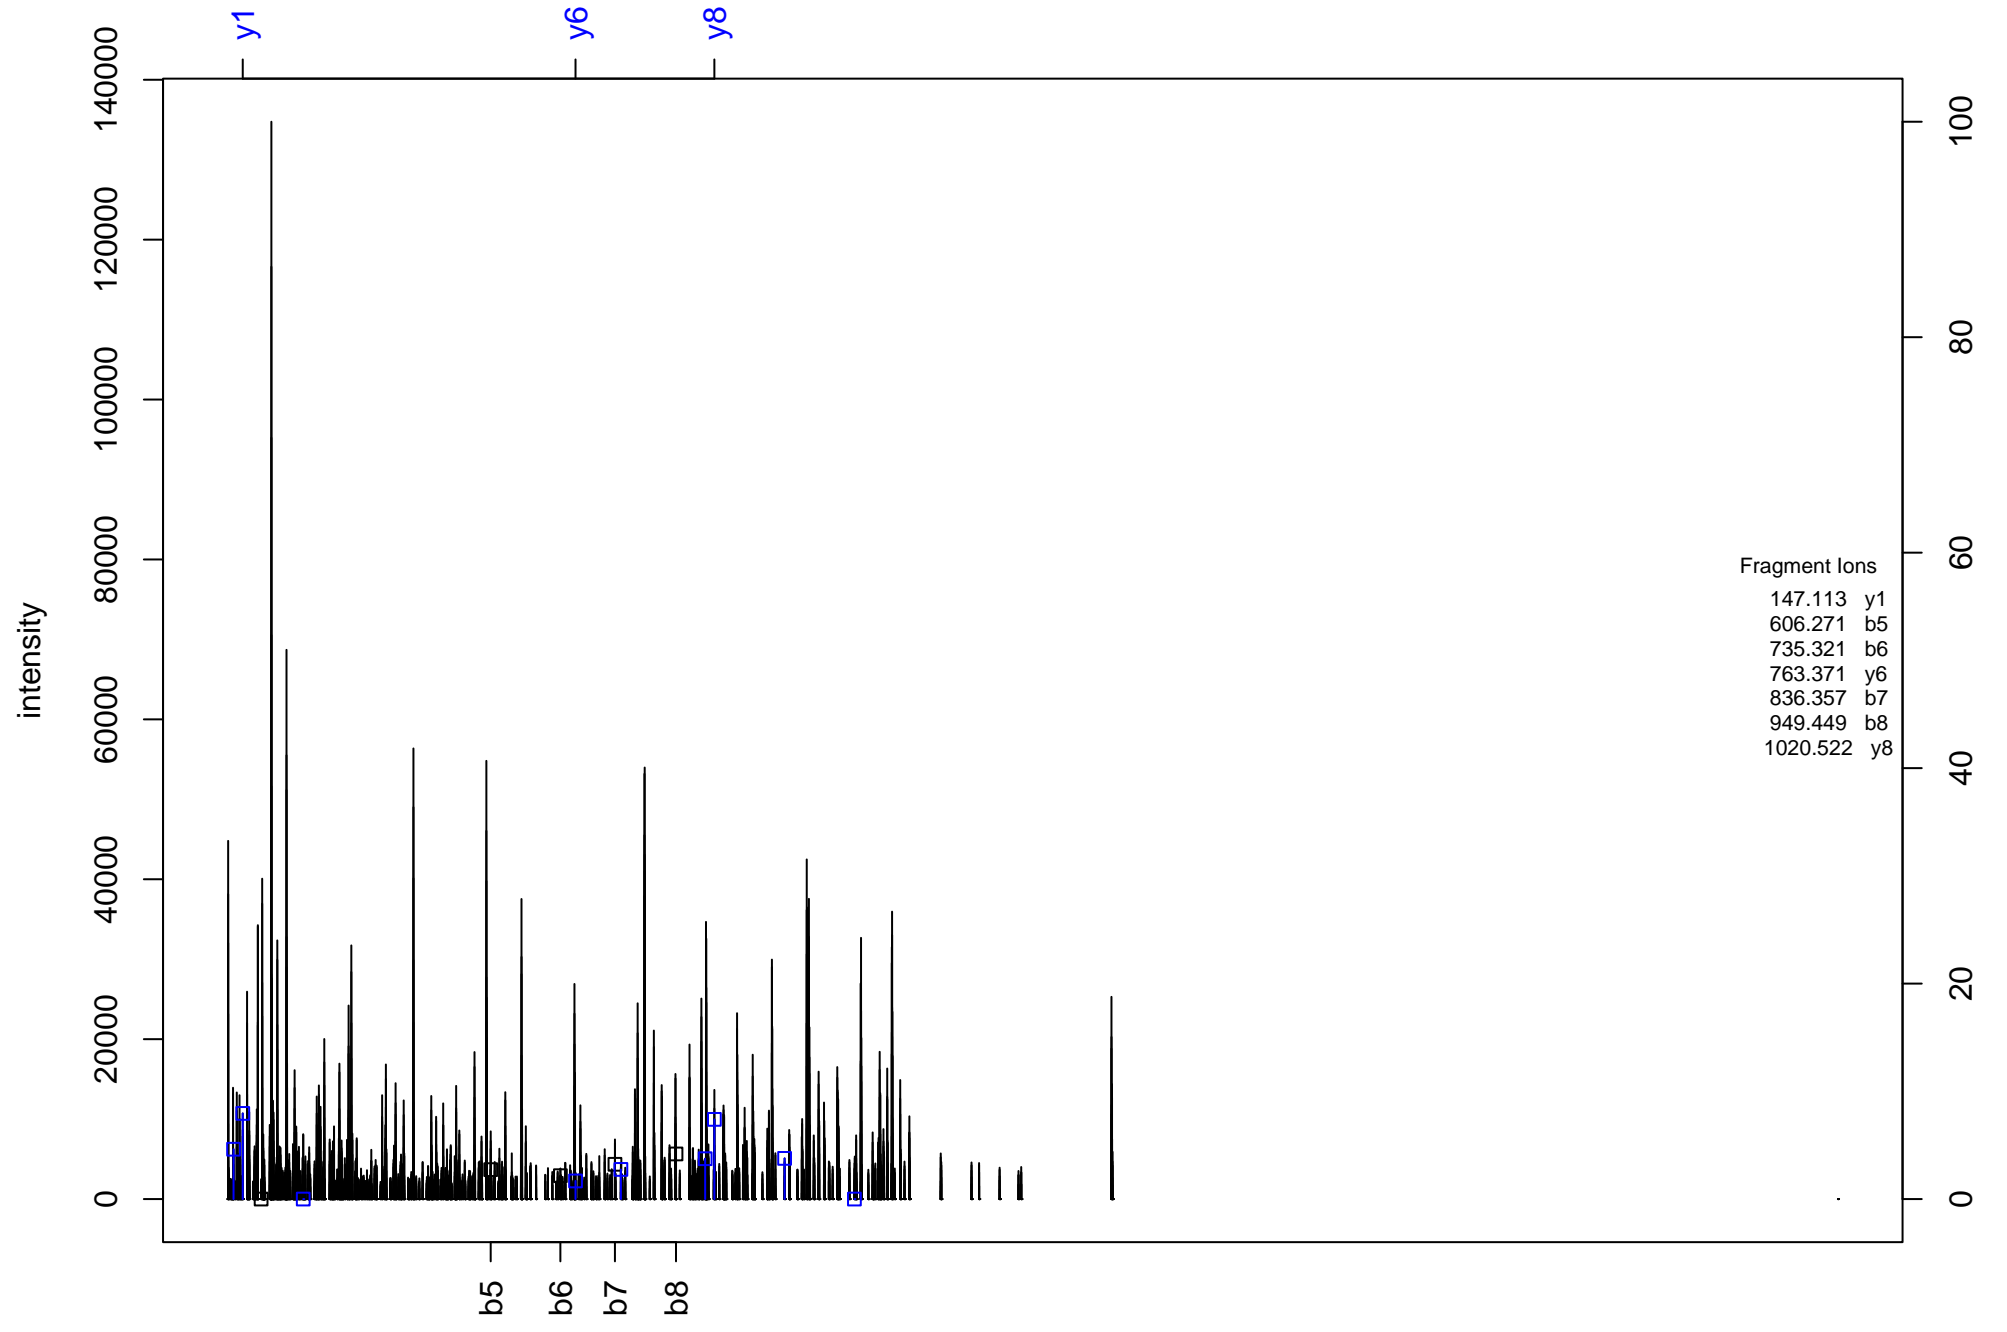

# VQLSSPGQLFTALER

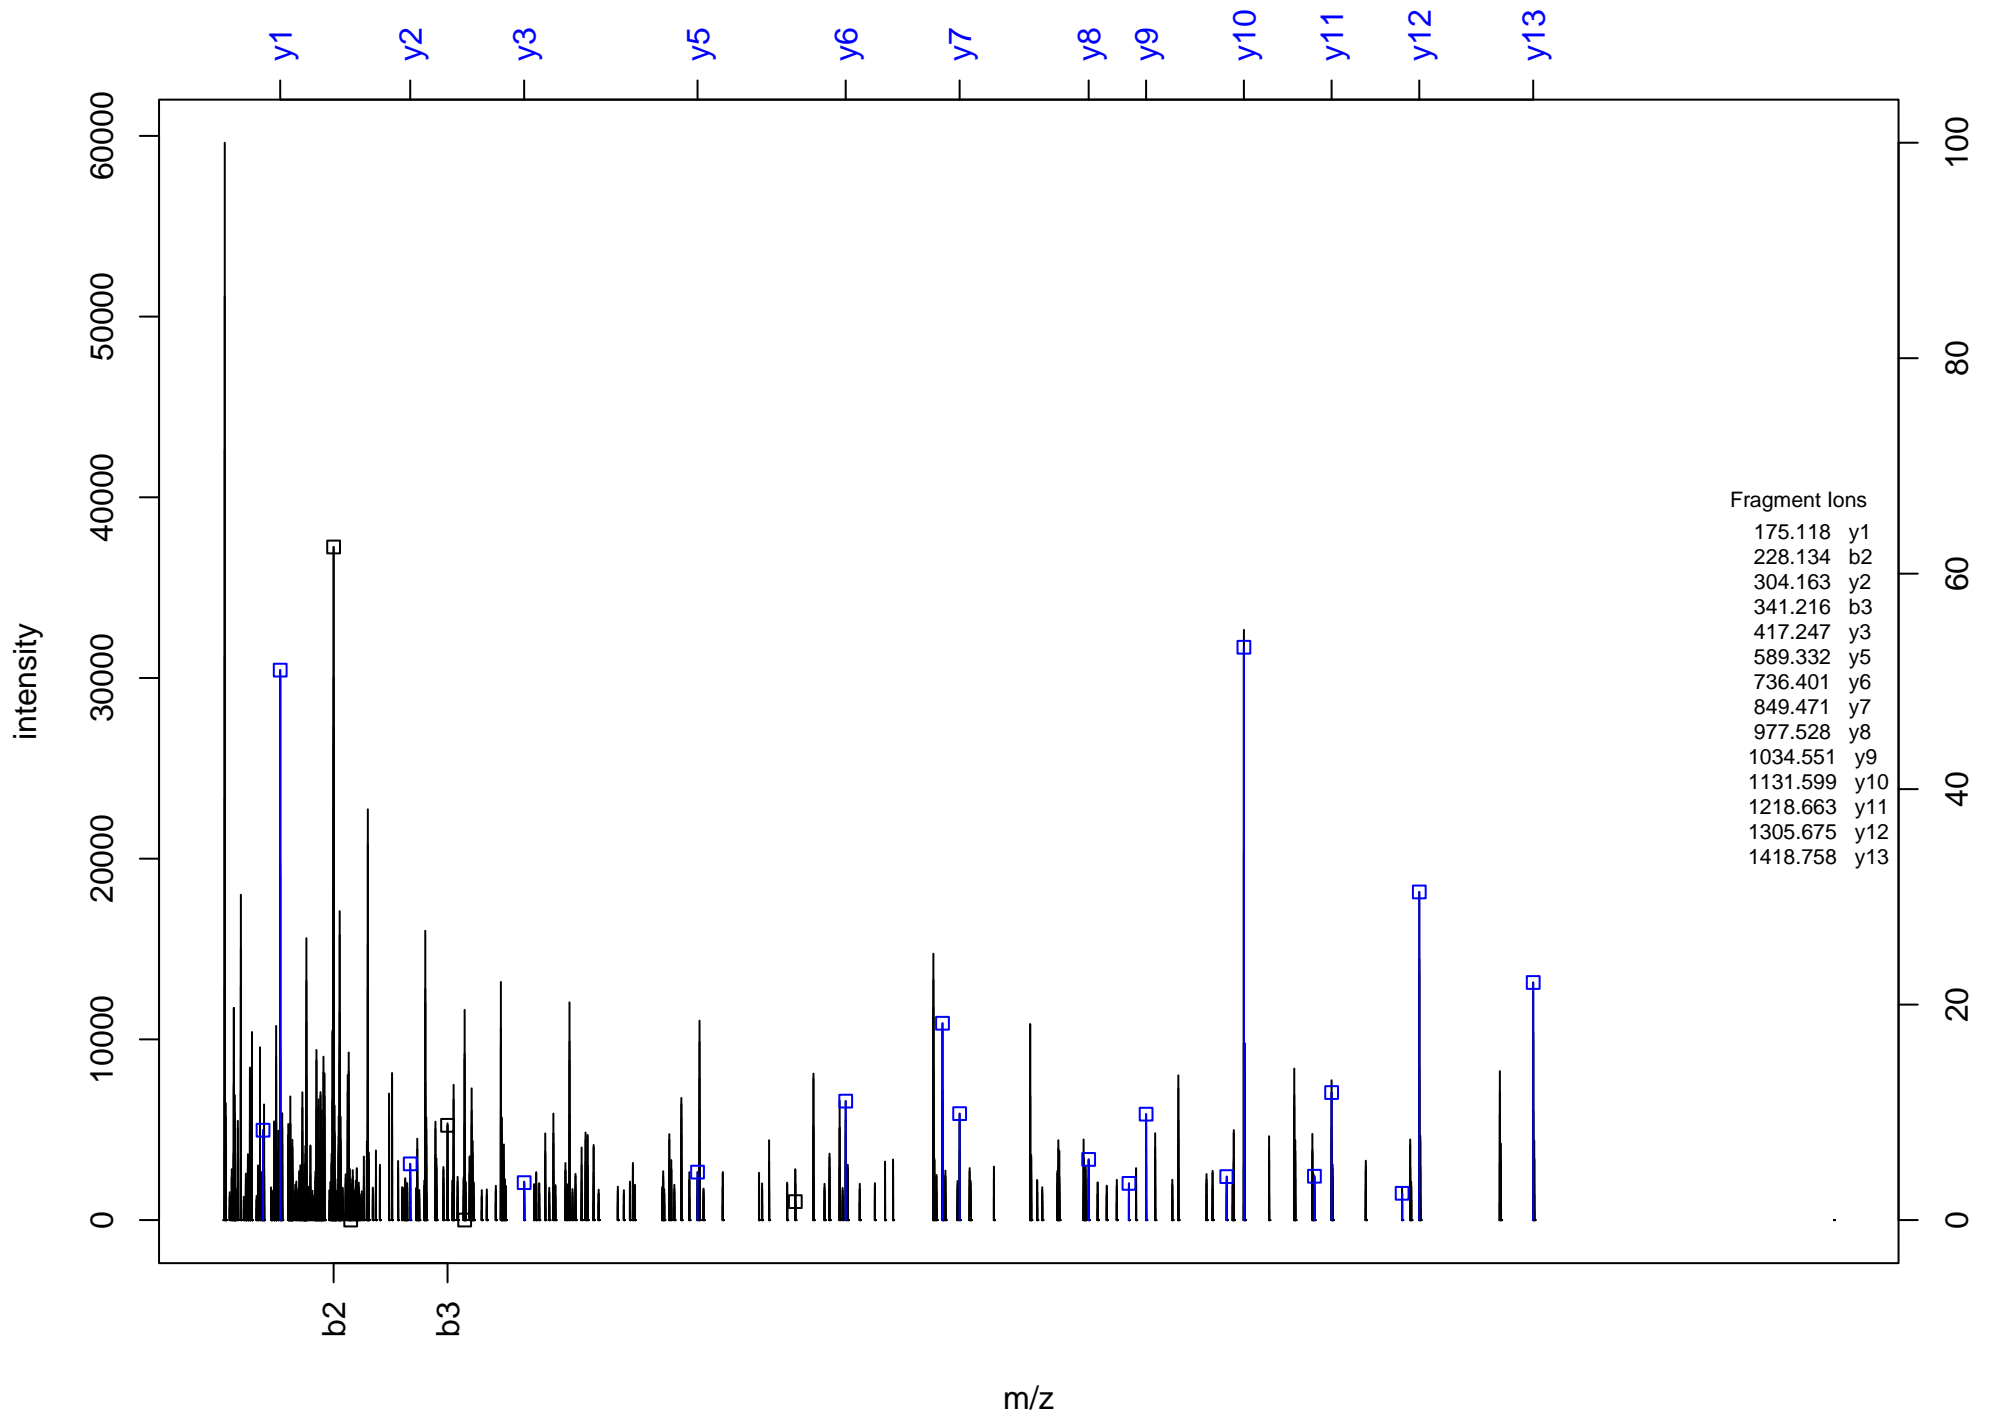

# YLVQDTDEFILPTGANK

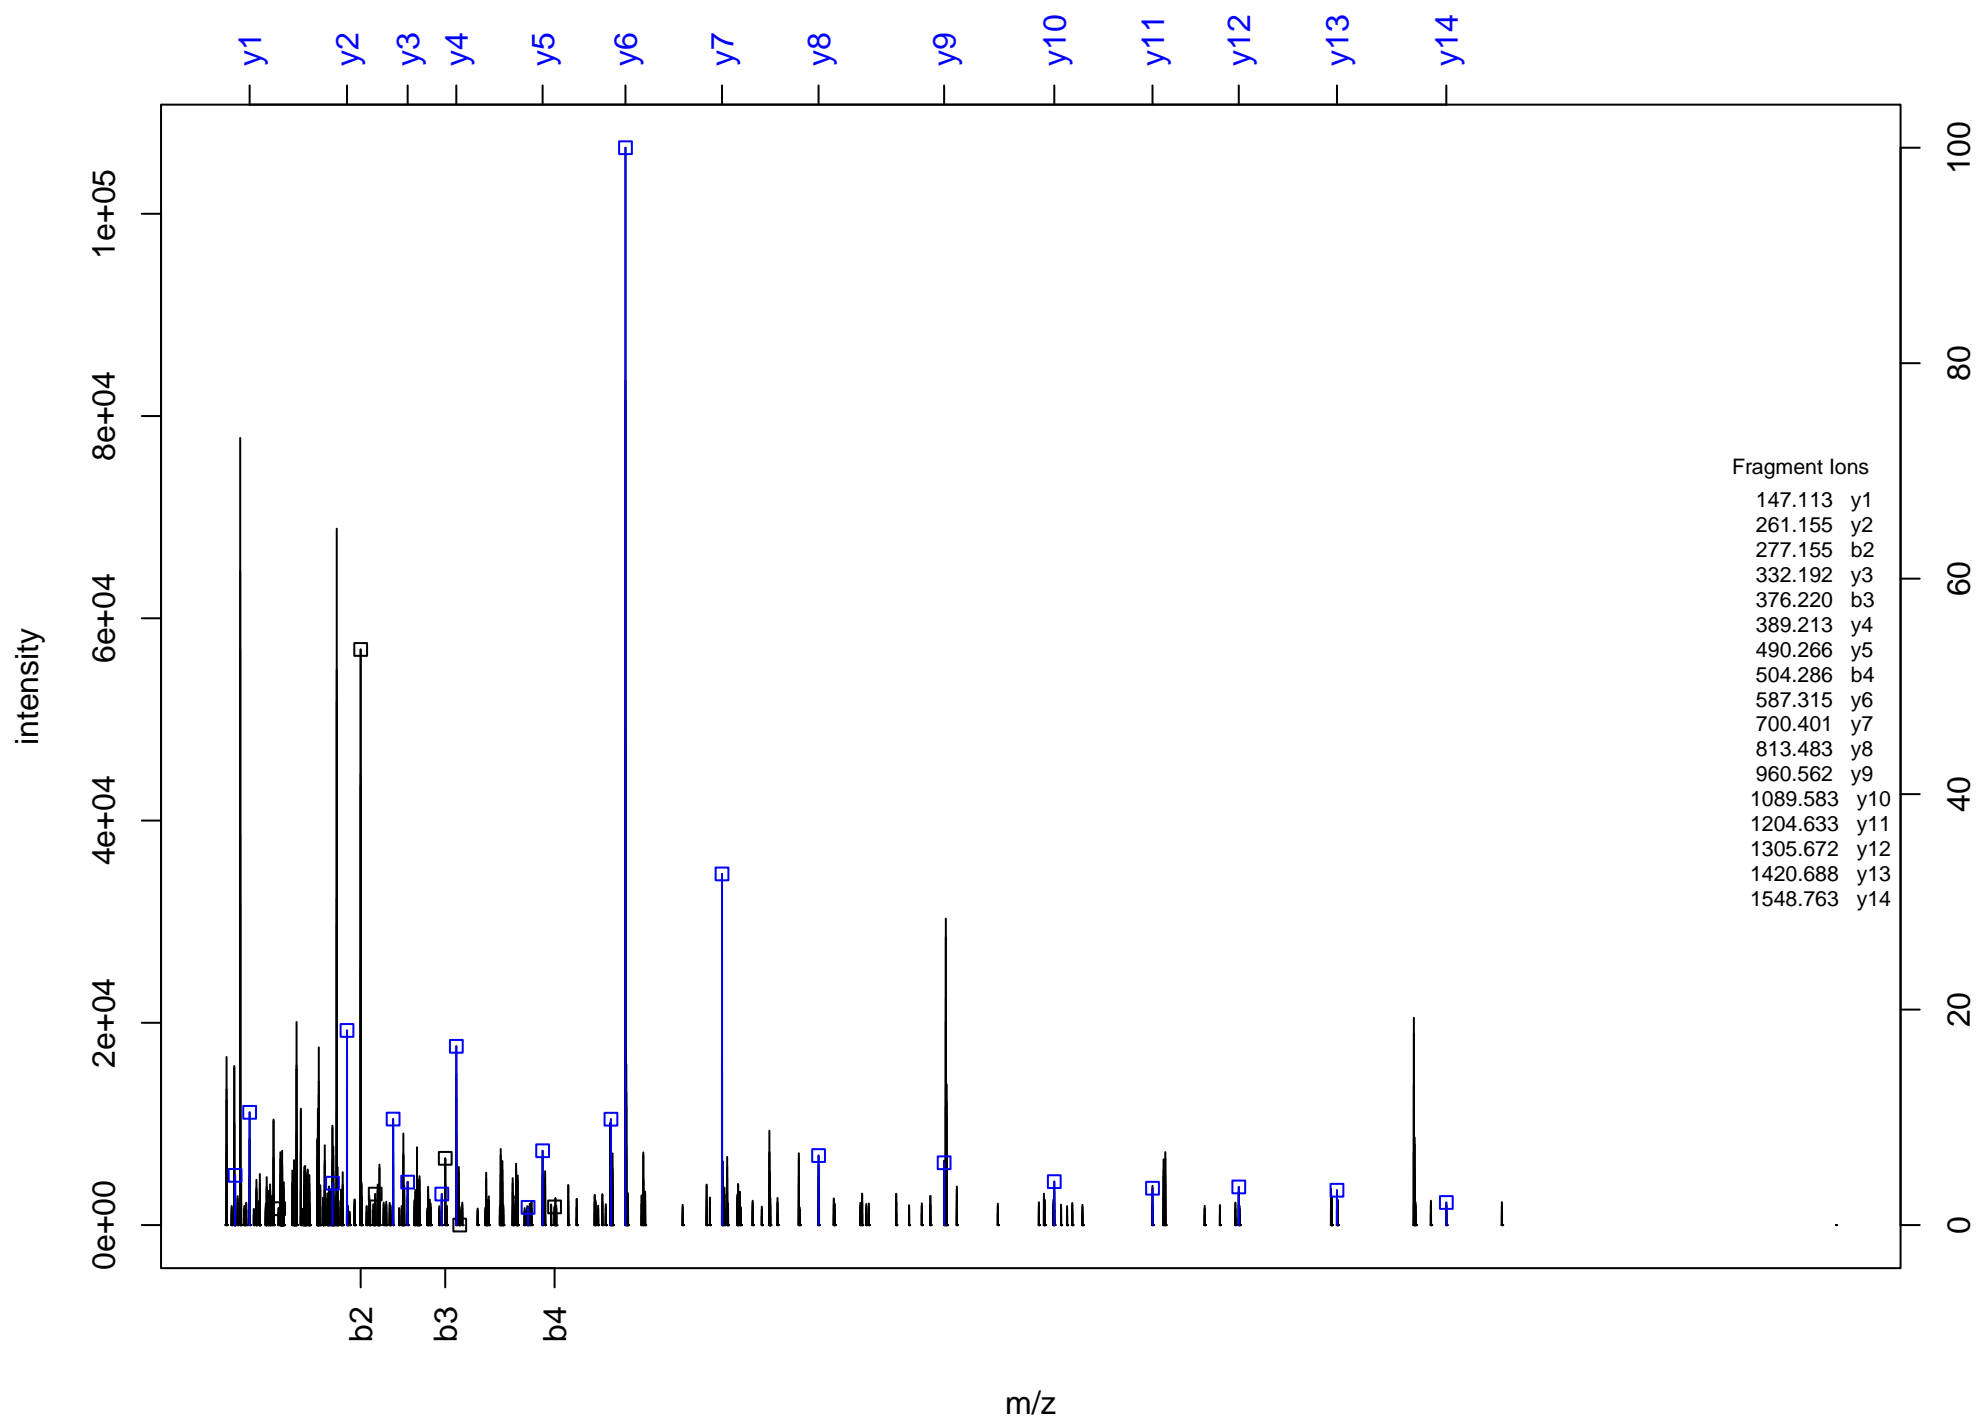

# DDAFAMQDVPLSSVVR

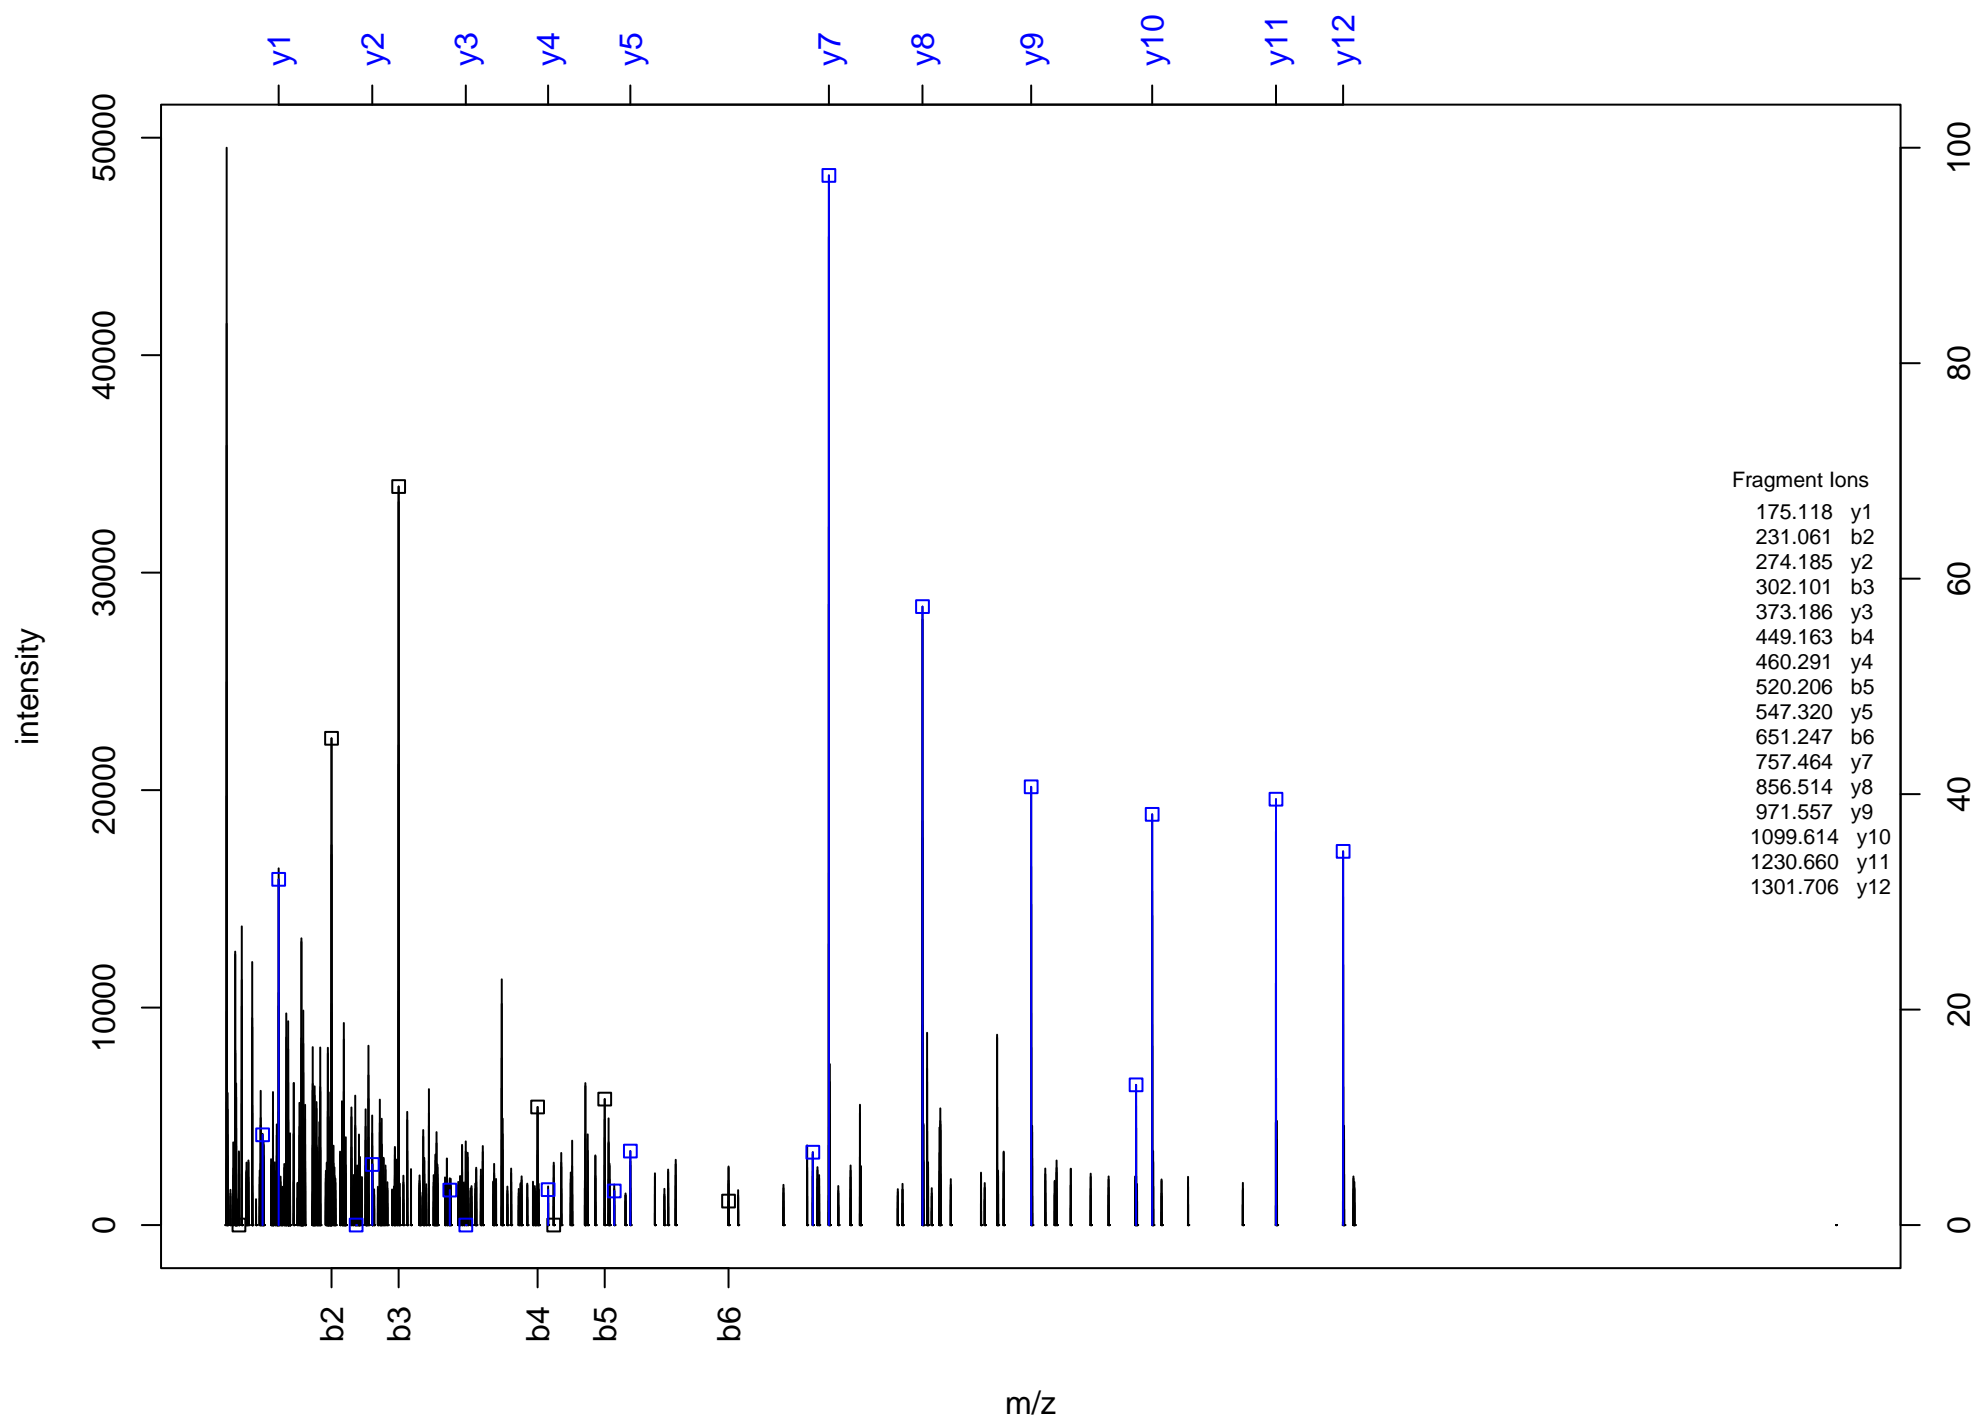



# VLFGAAVR

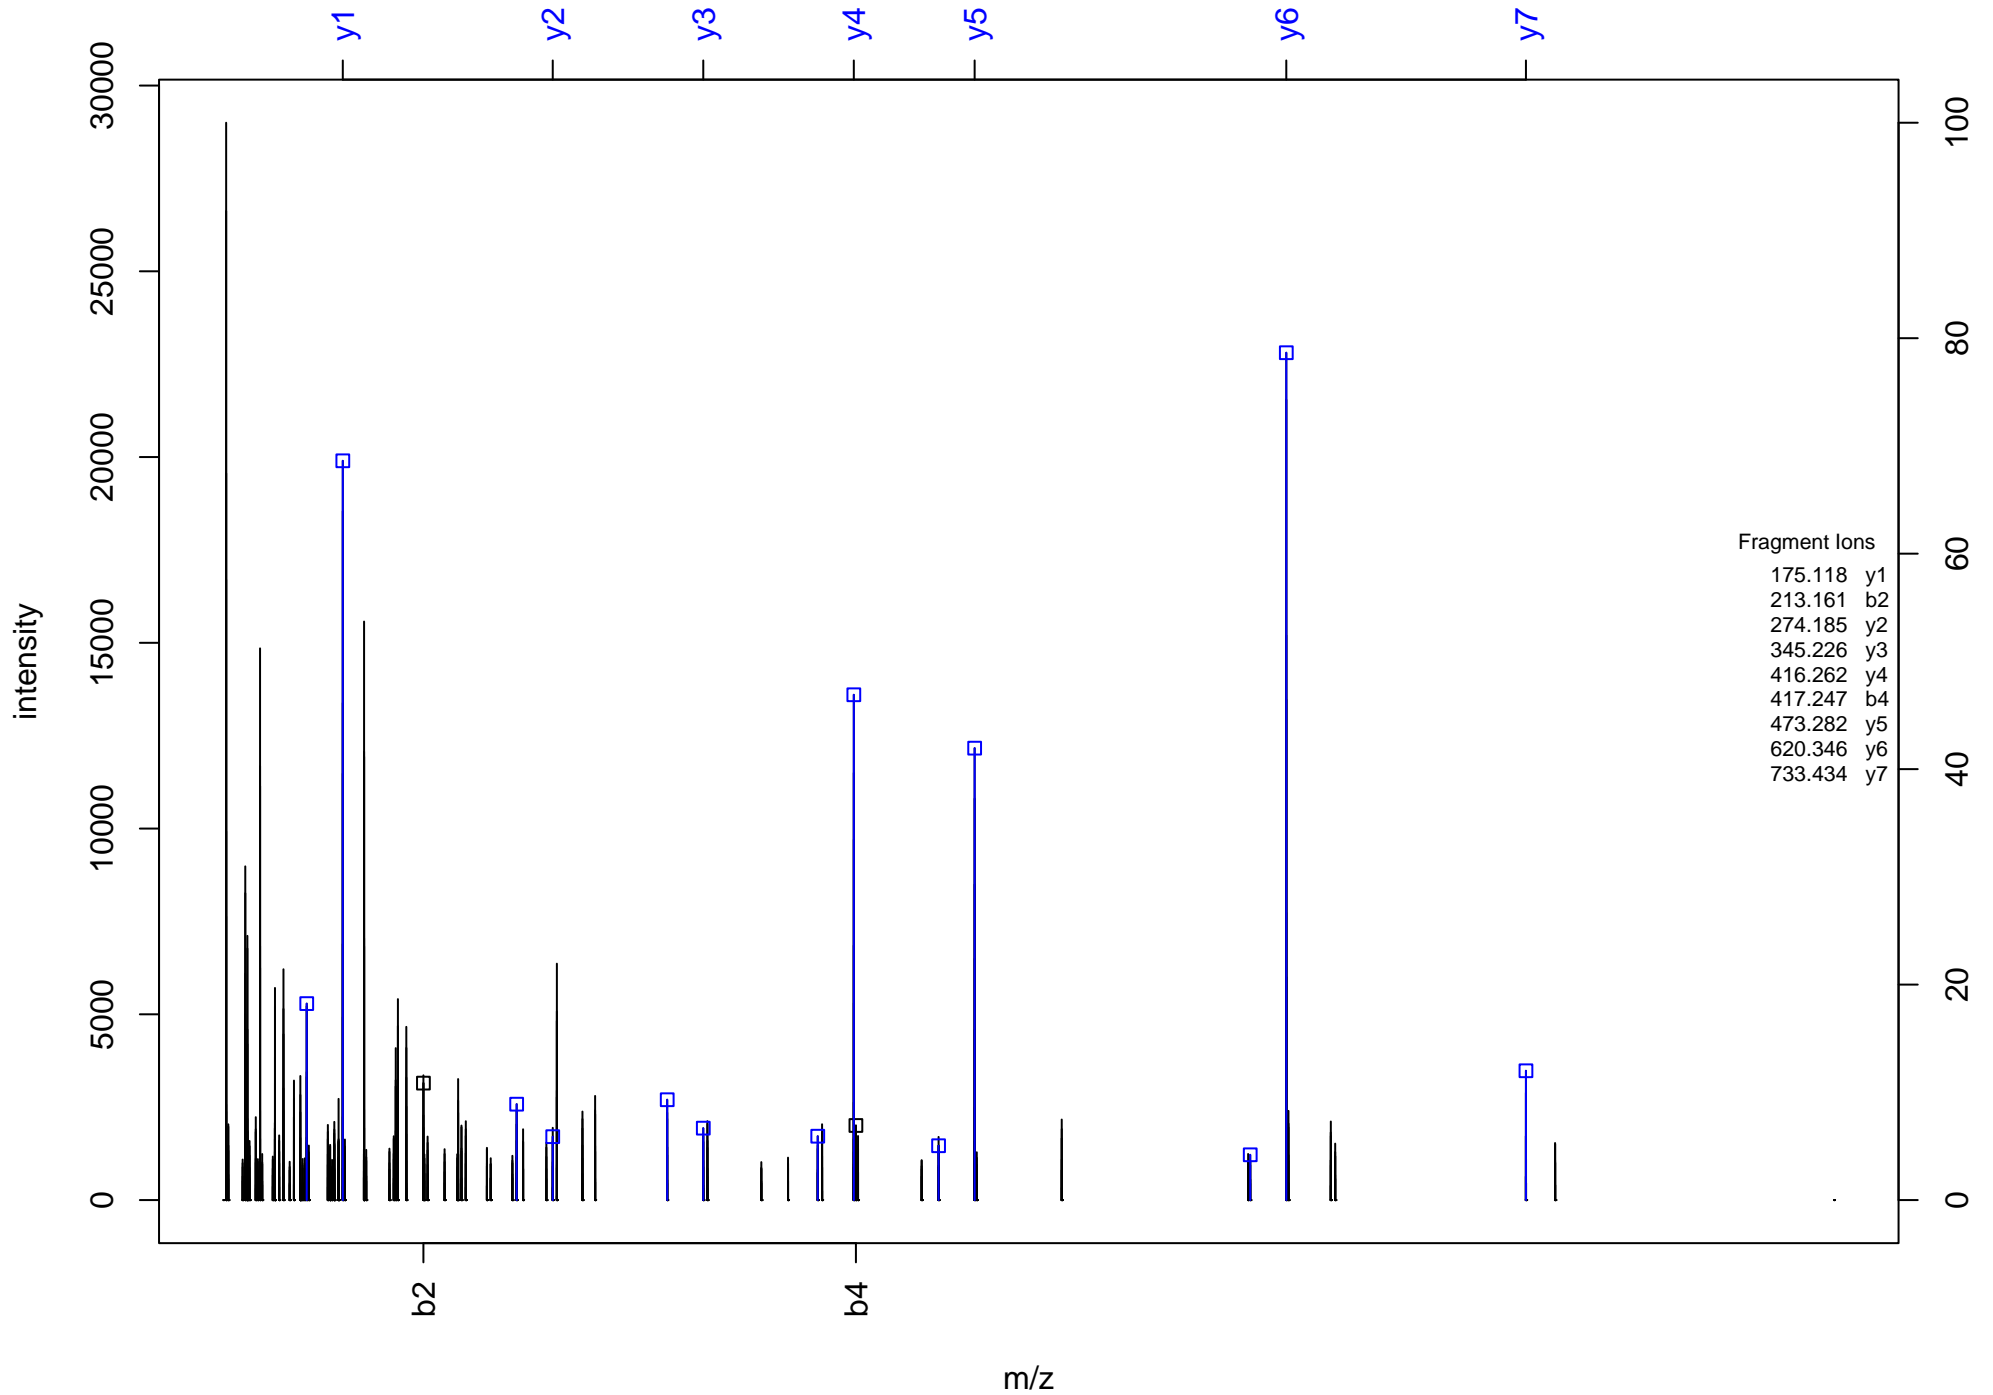

# EVKEN^SVVFN^NTPK

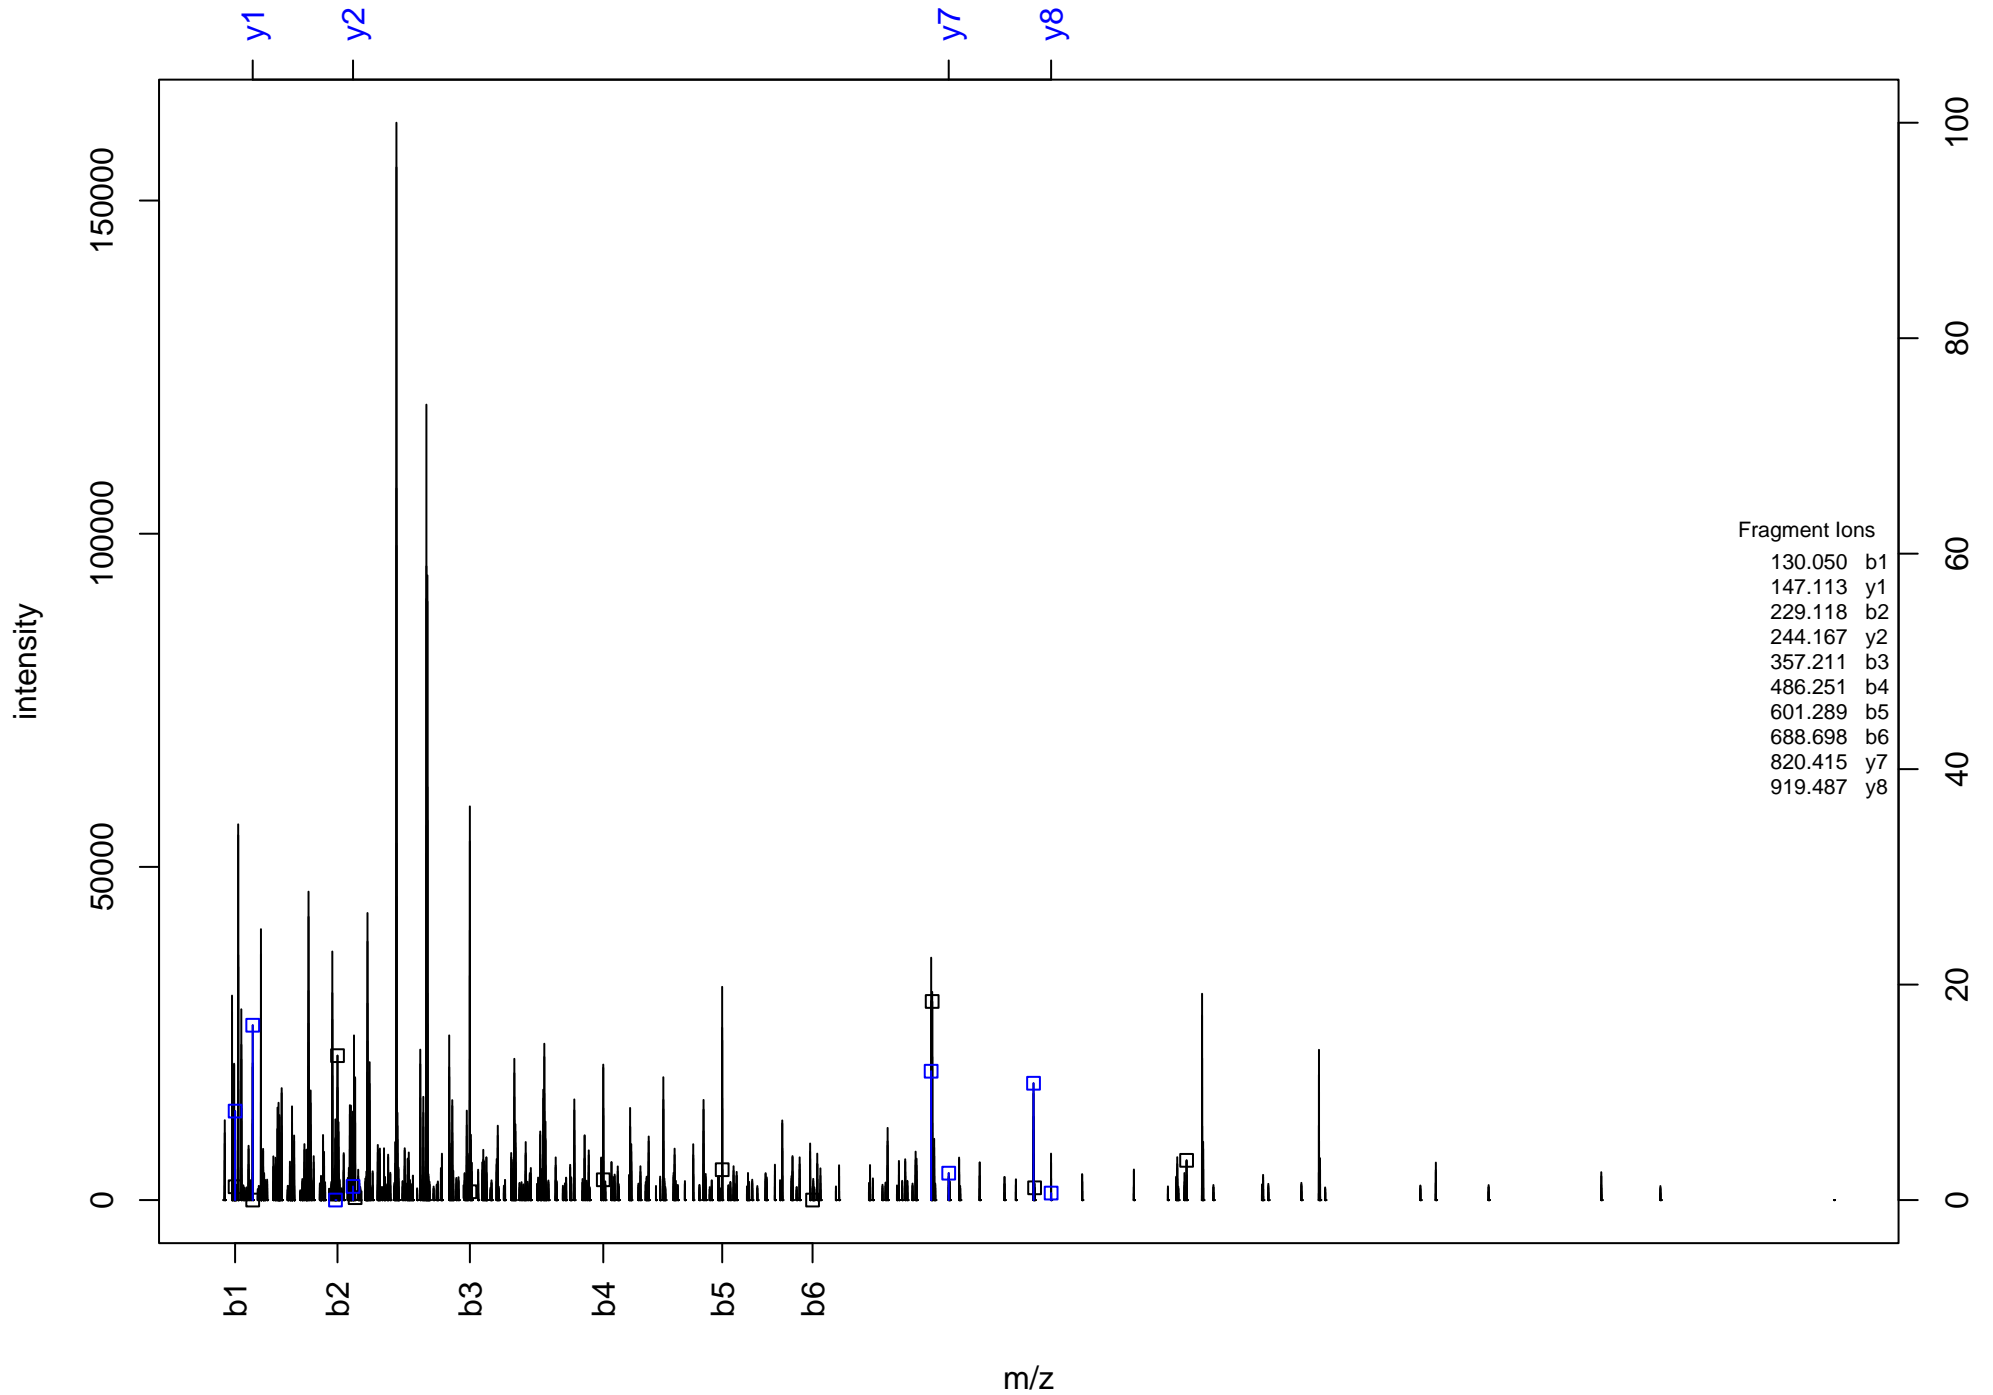

# GLFATQLIR

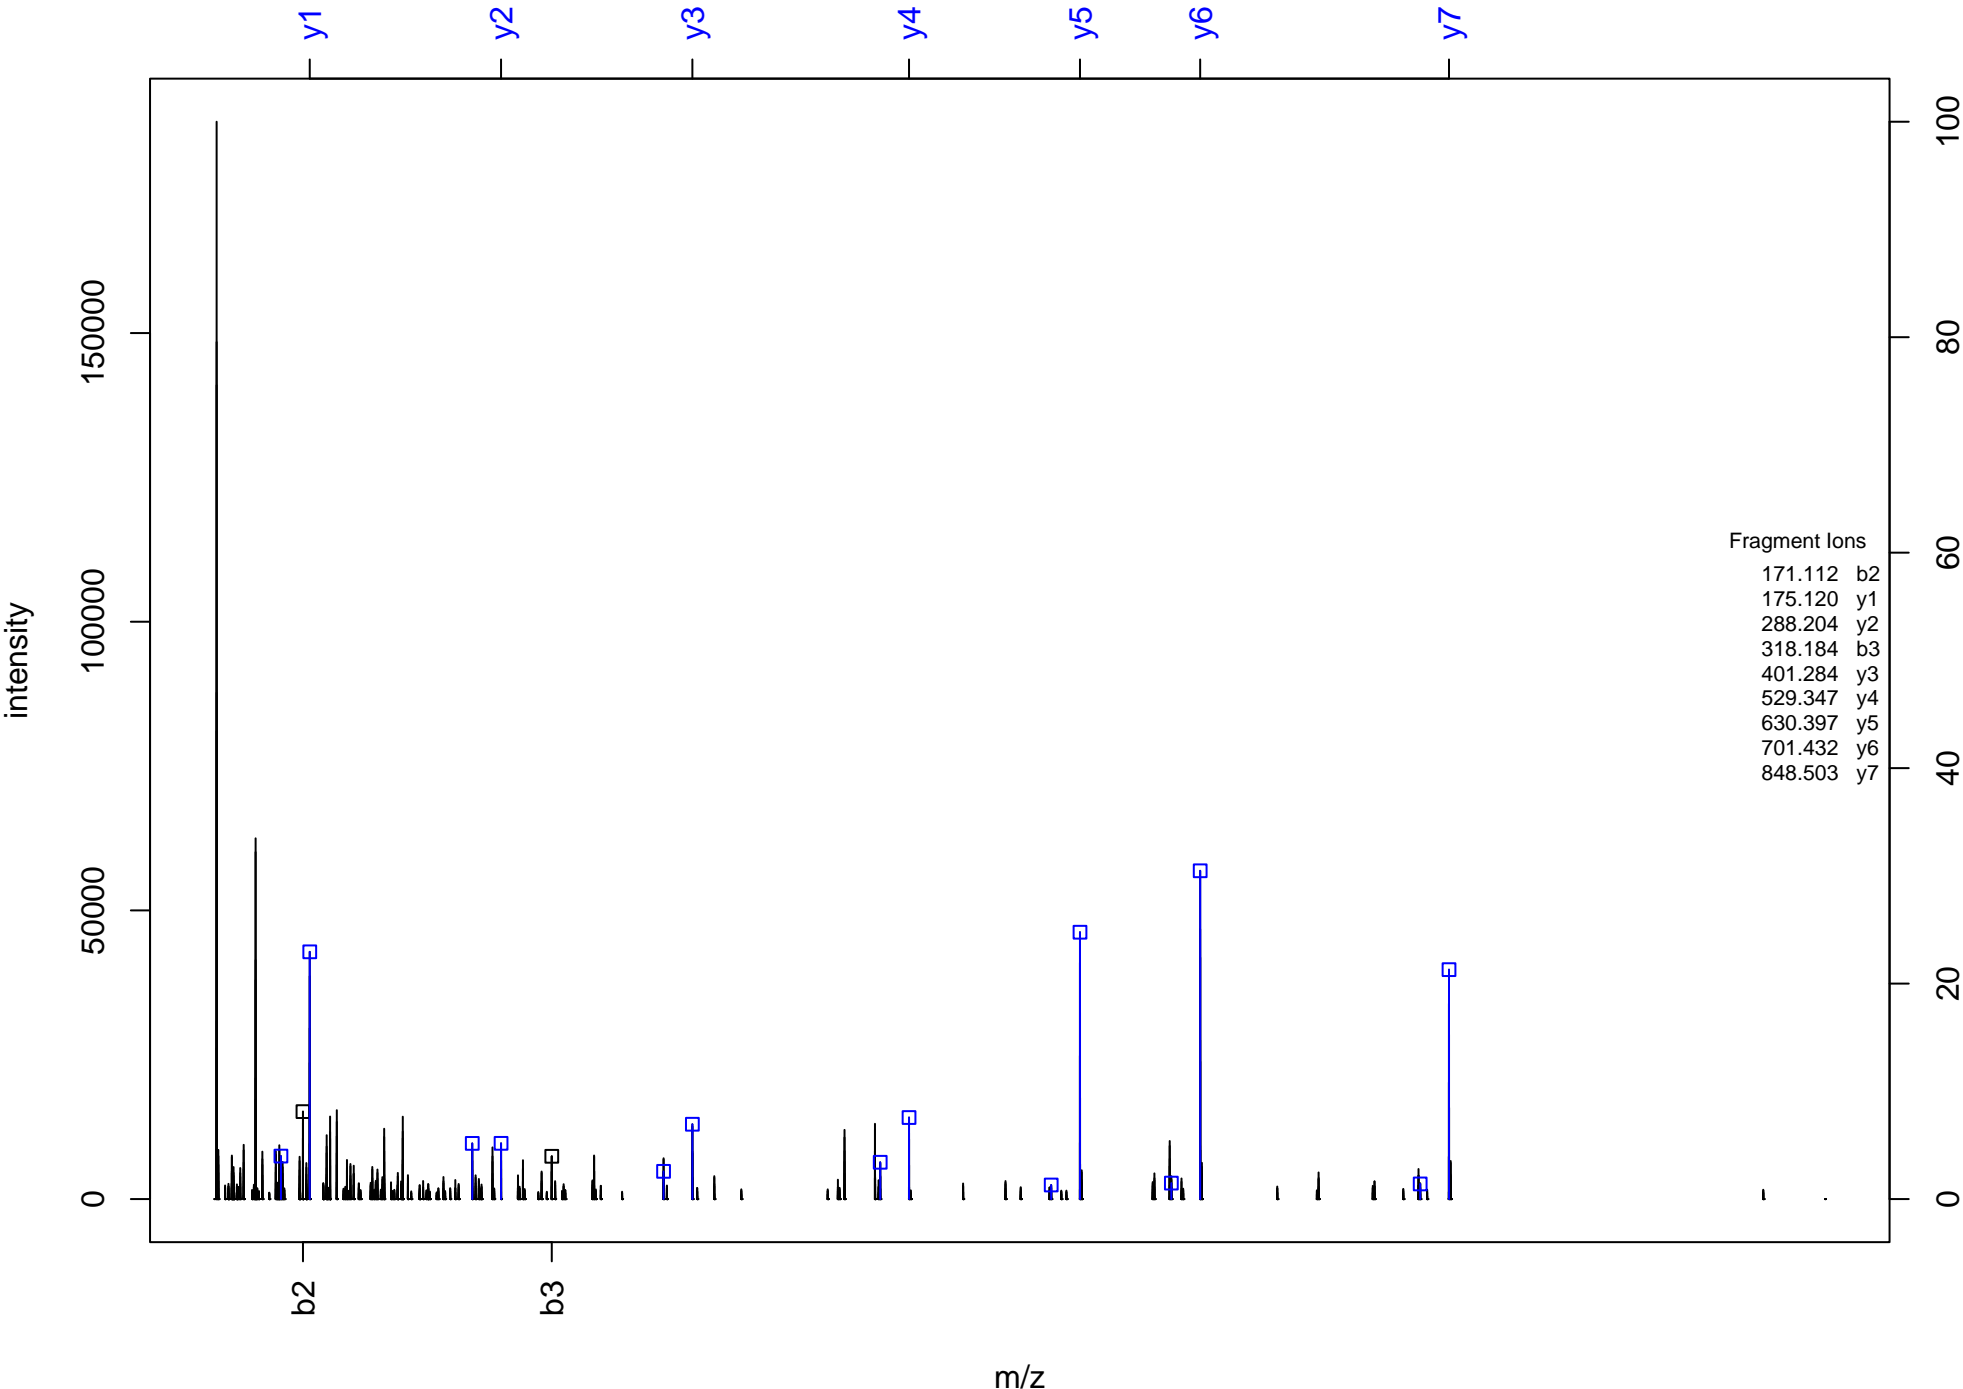

# DRLSSSYN^N^PK

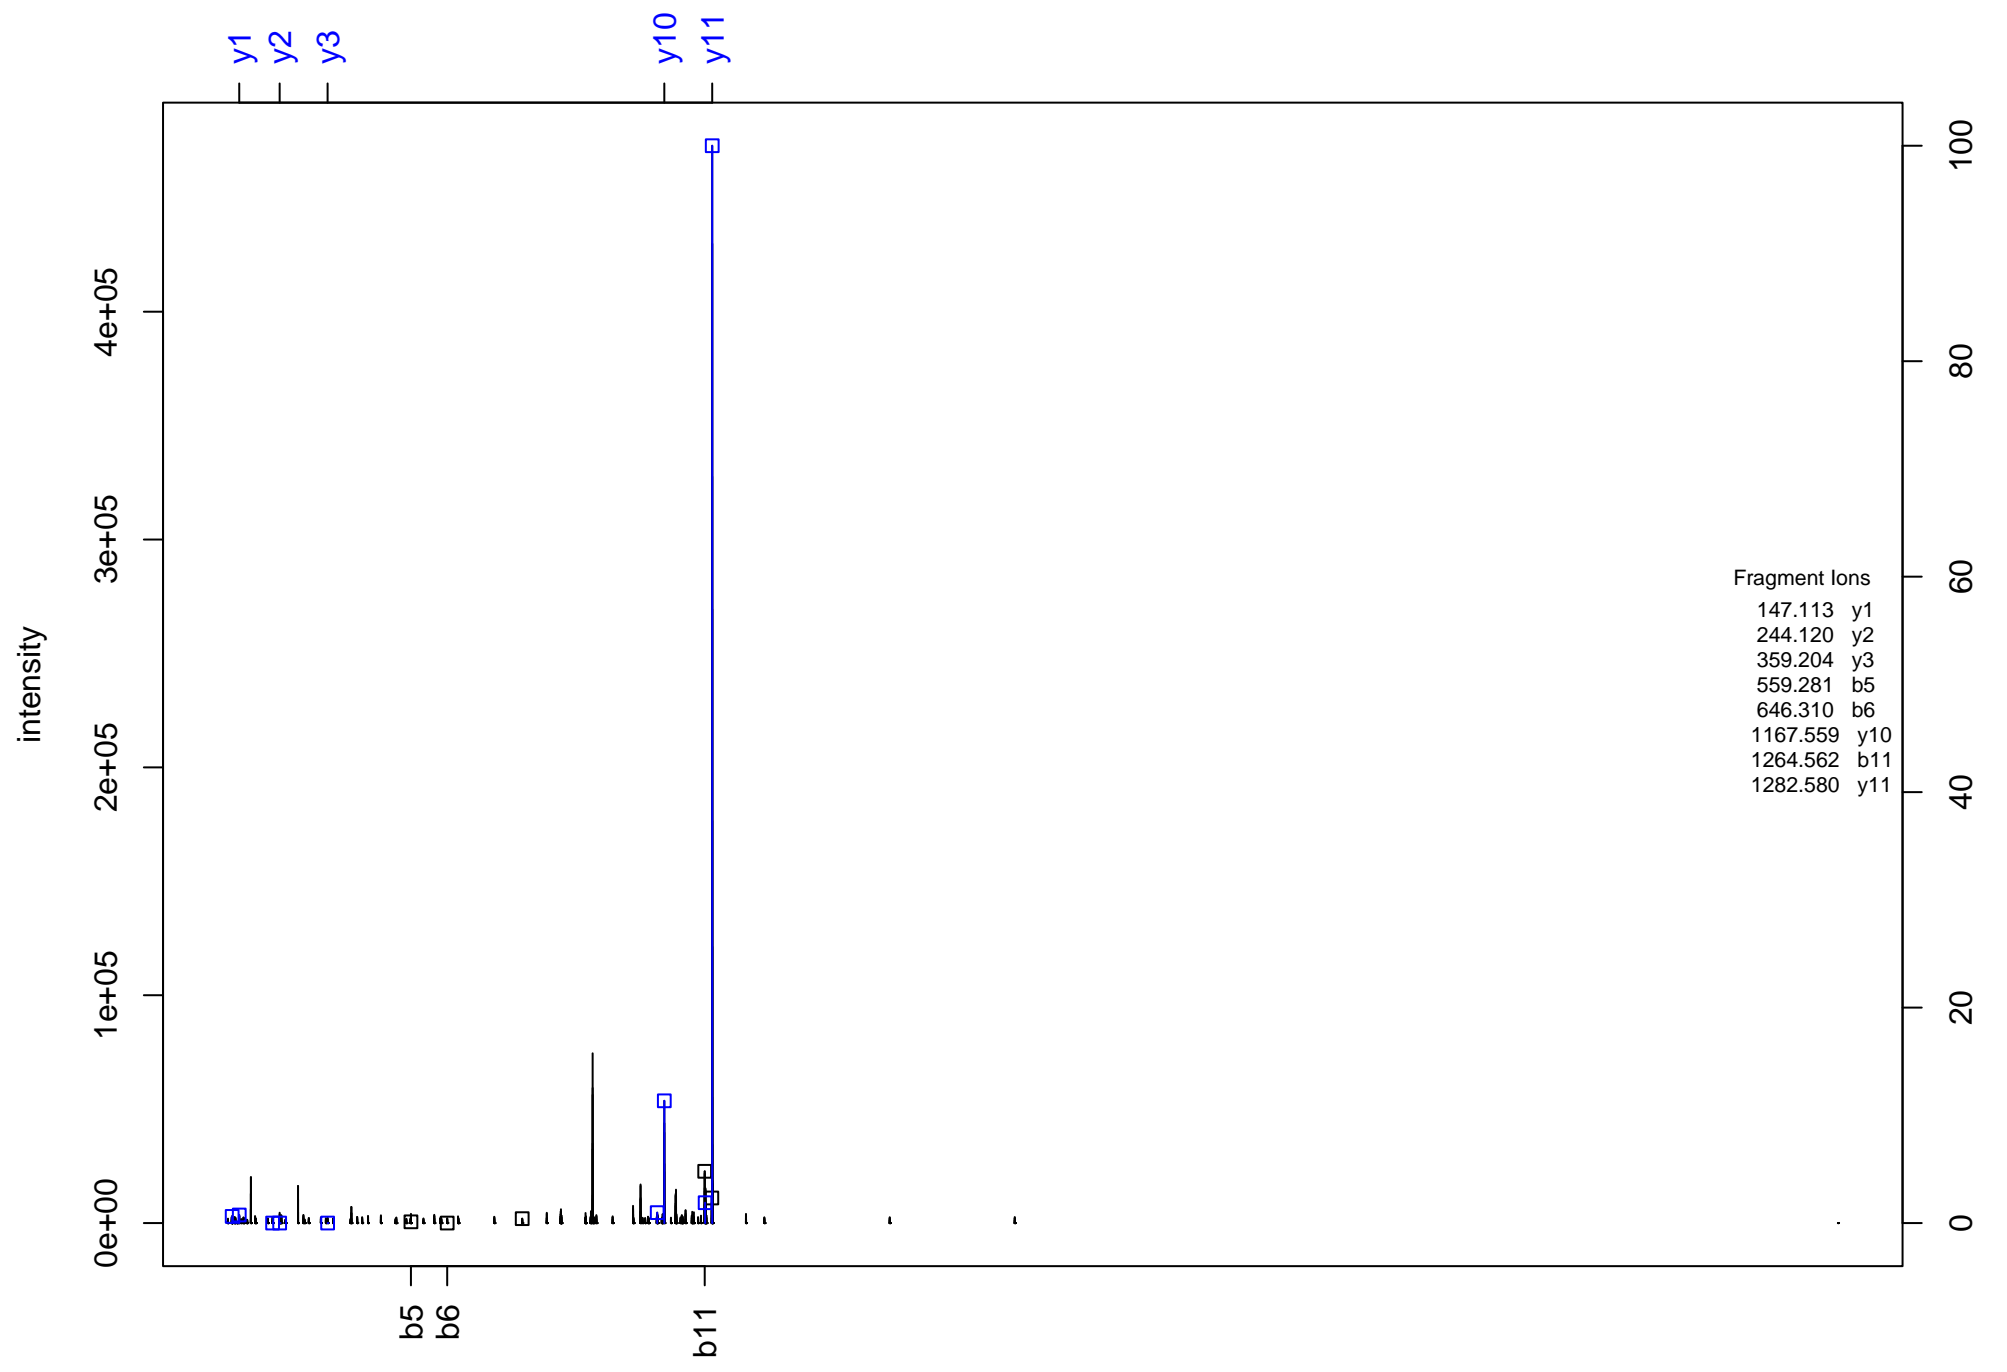

# LILDWVPYIN^GK

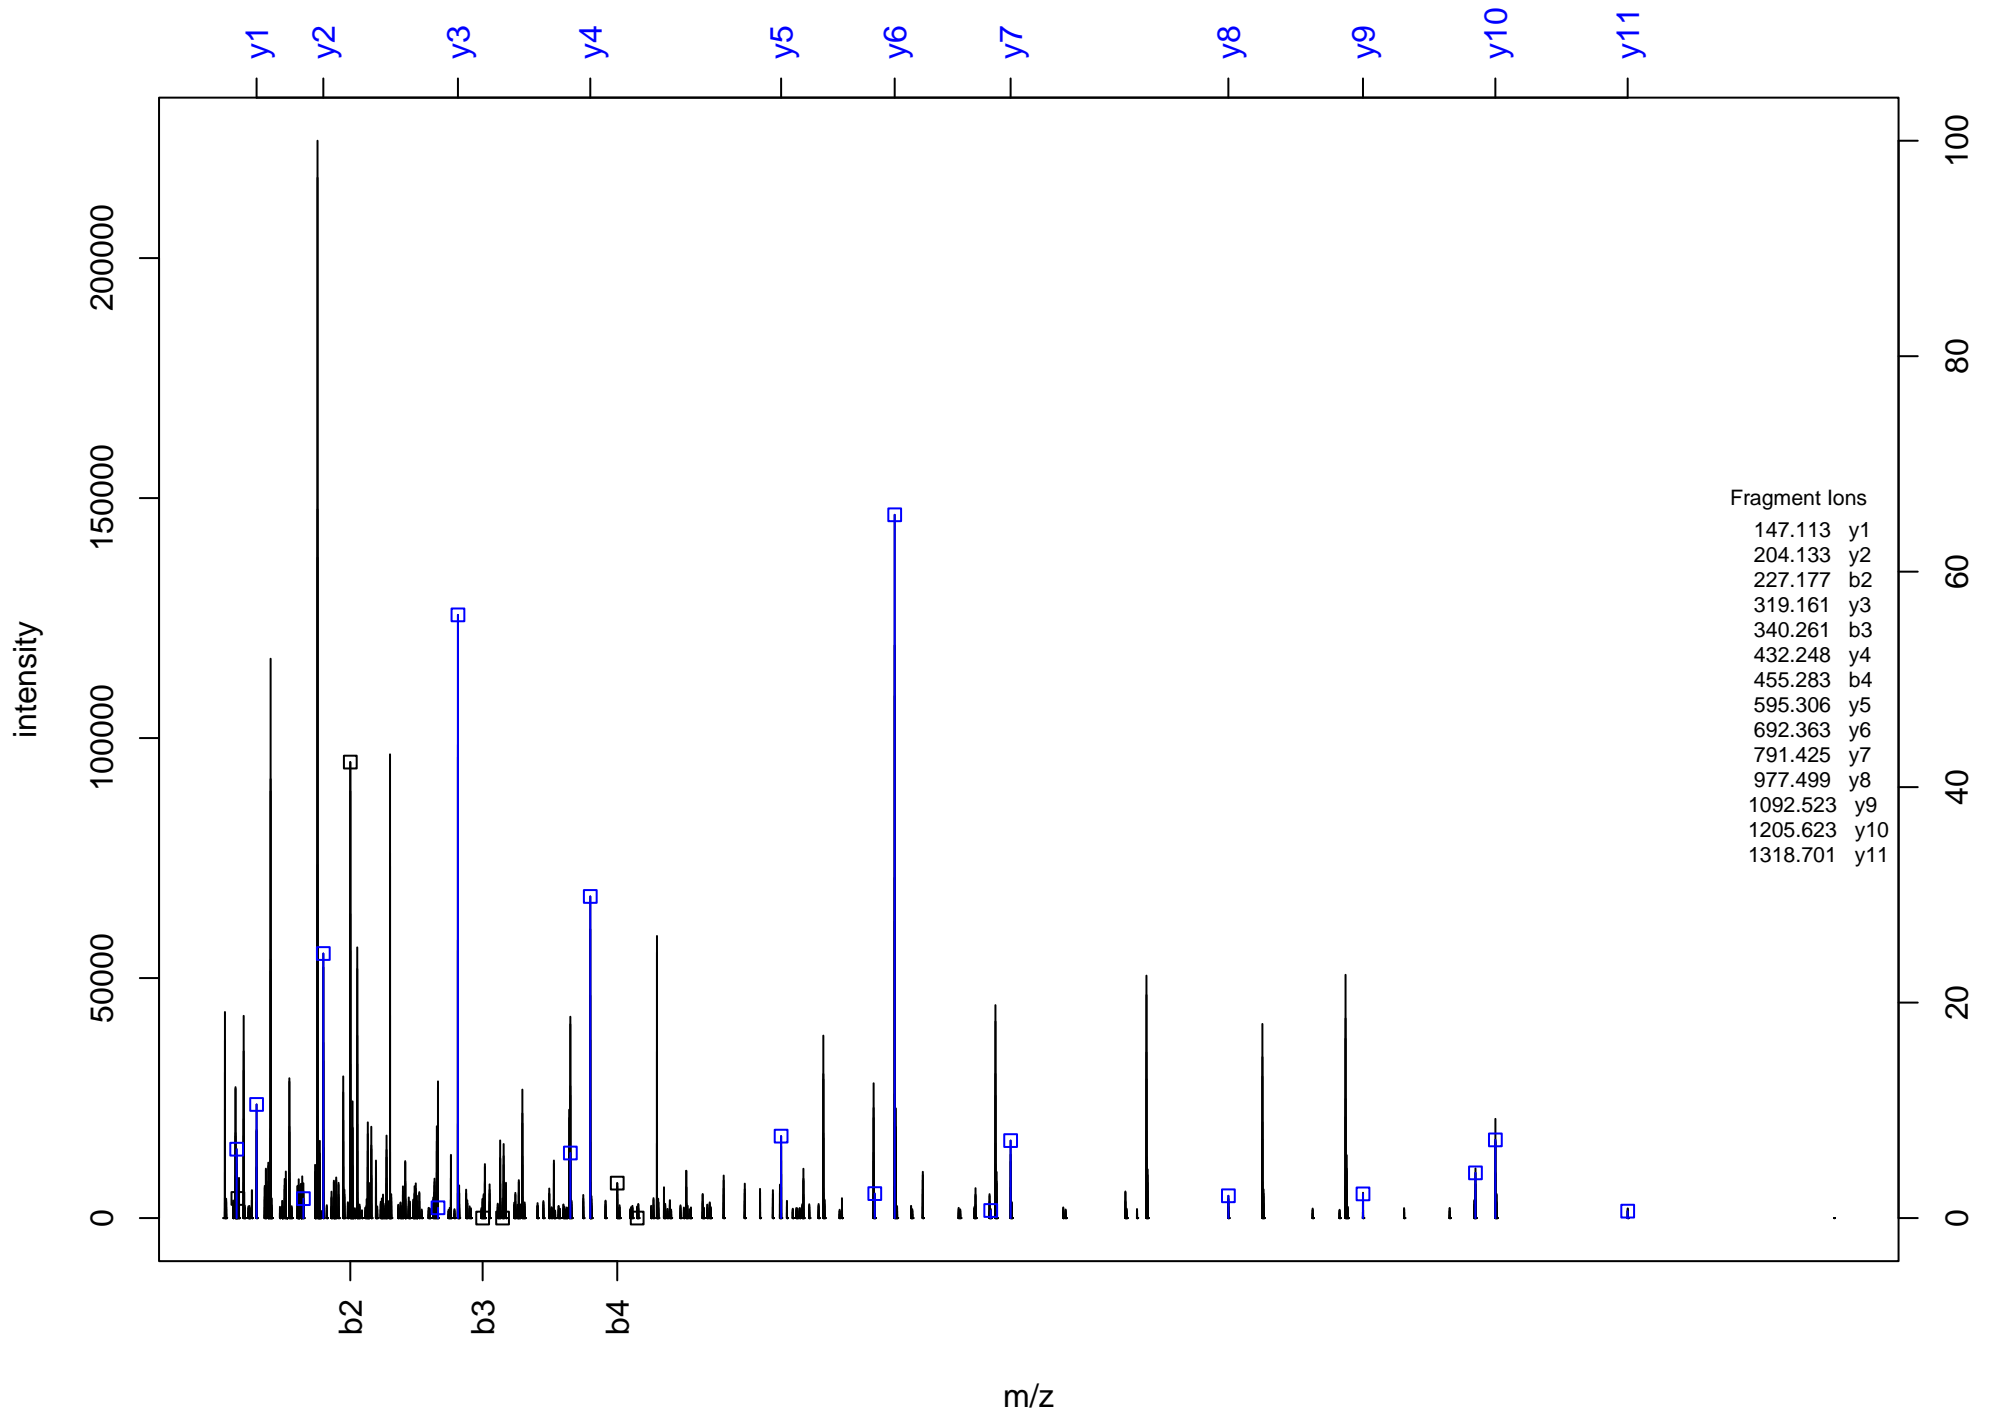

# LPPTPLLLFPEEEATNGR

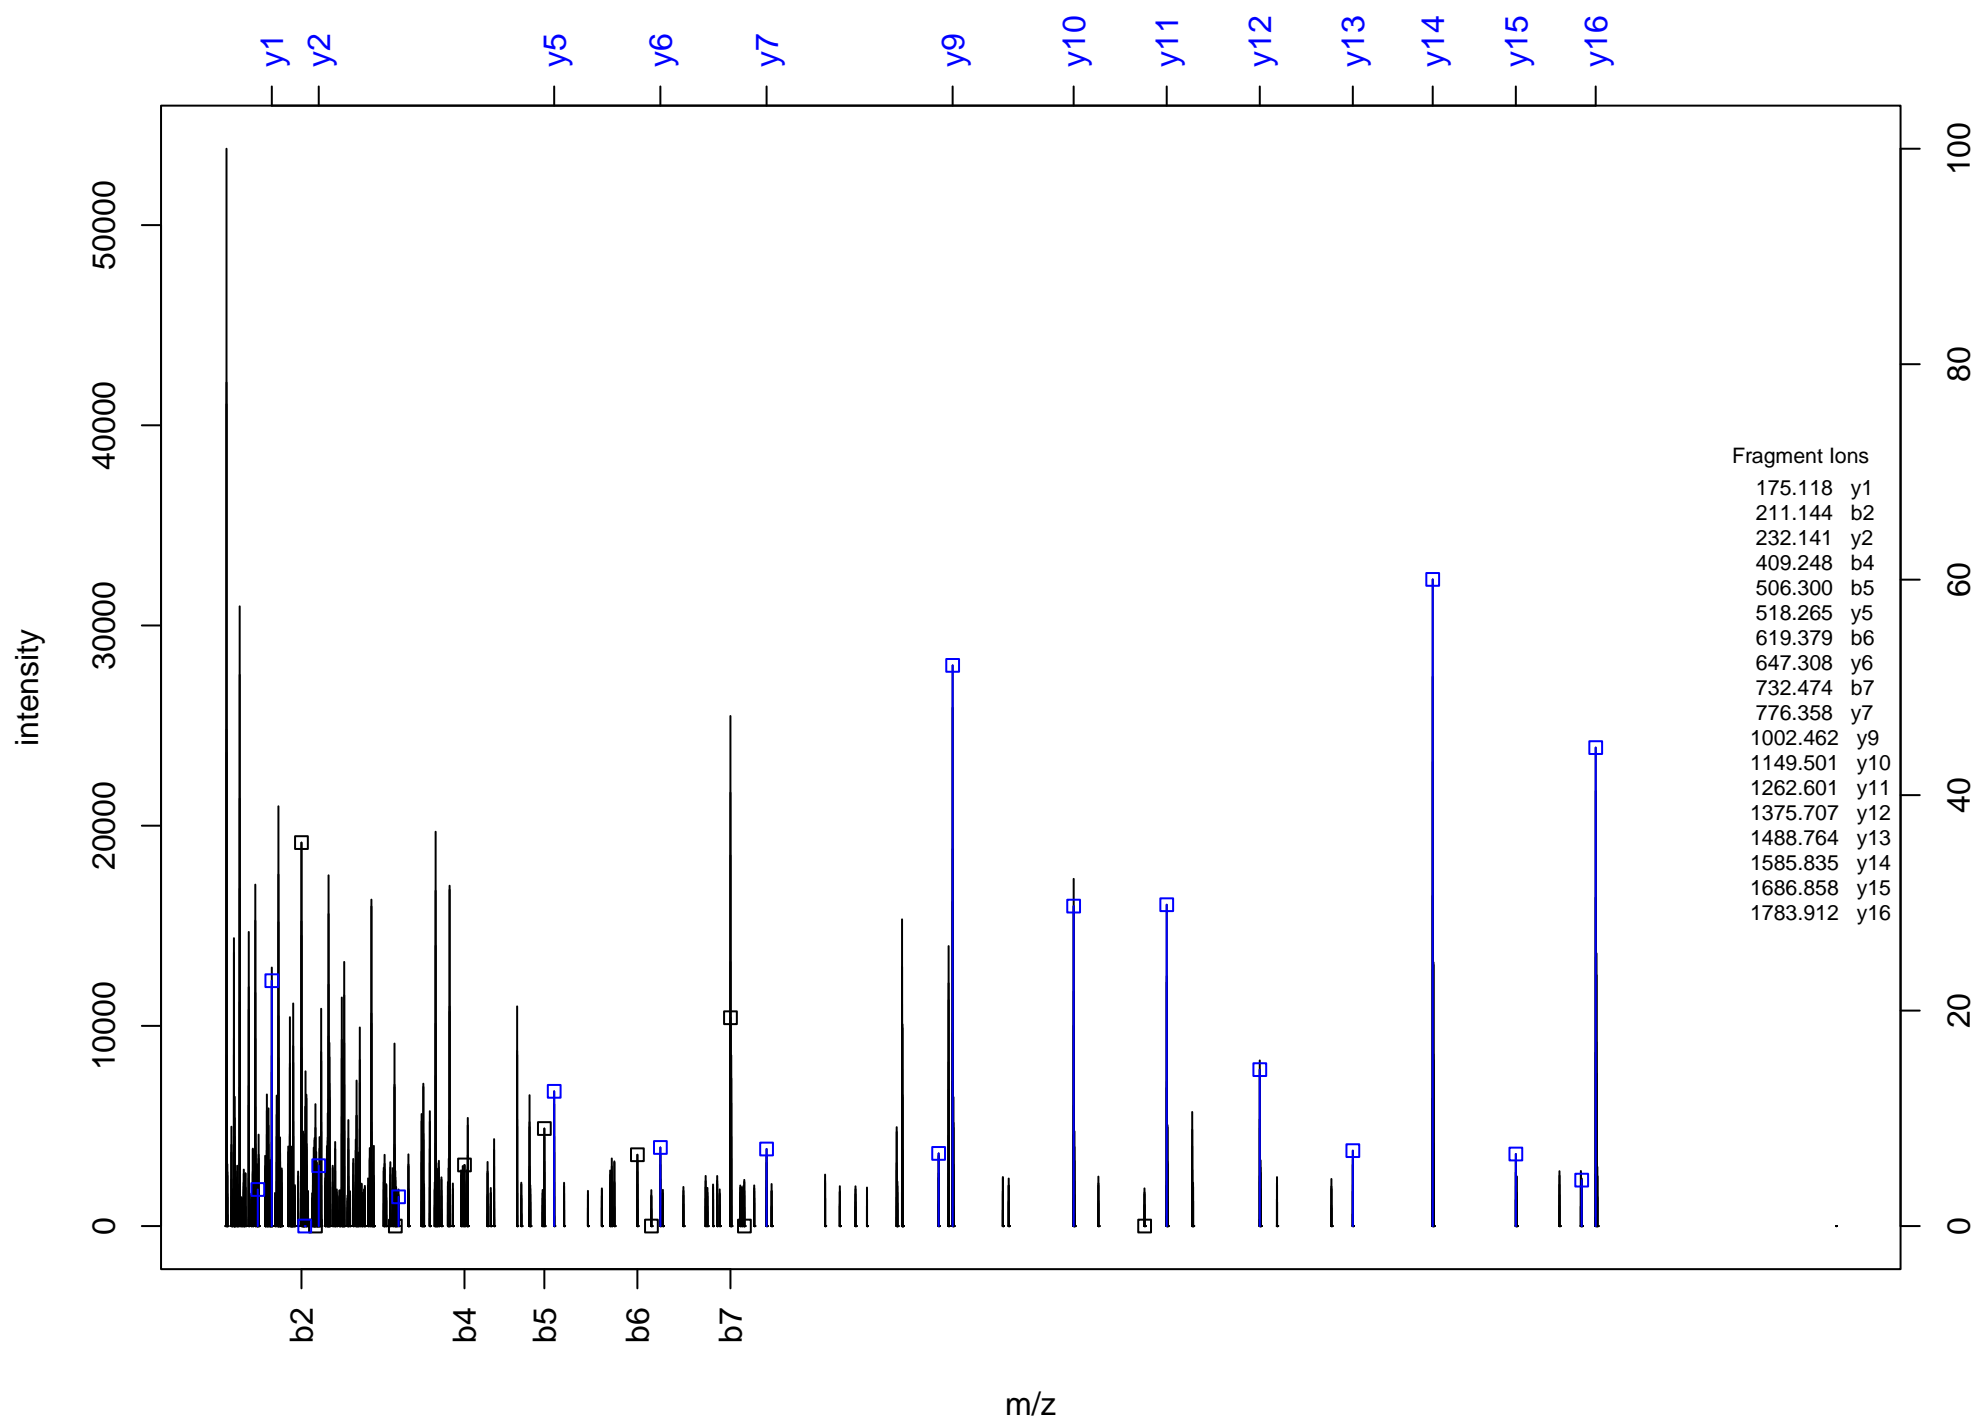

# DFLKEFNNK

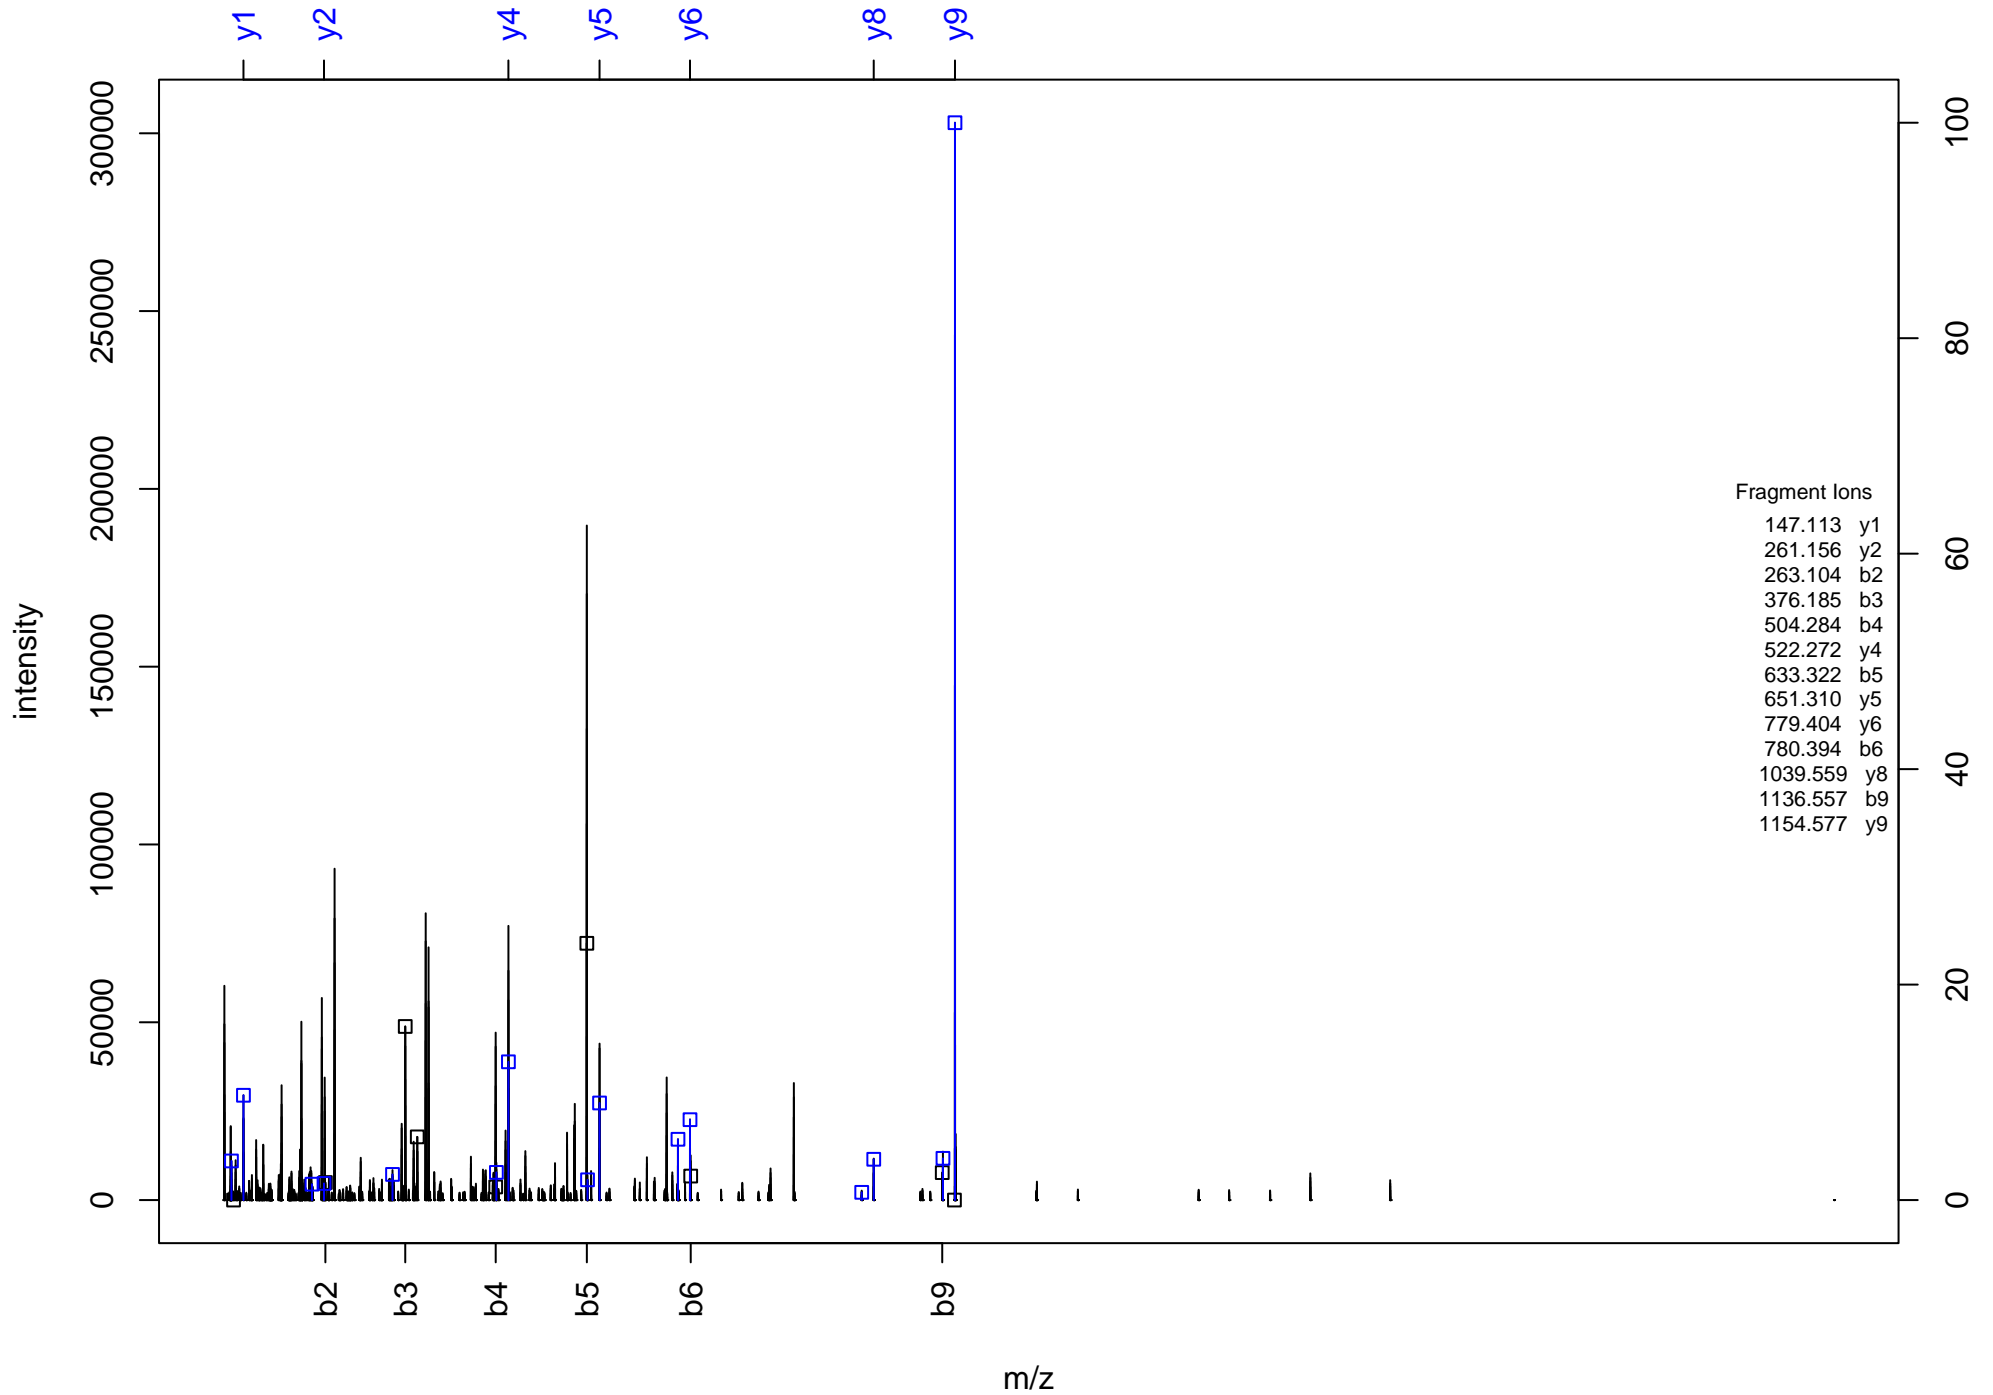

# DFVDLVLVK

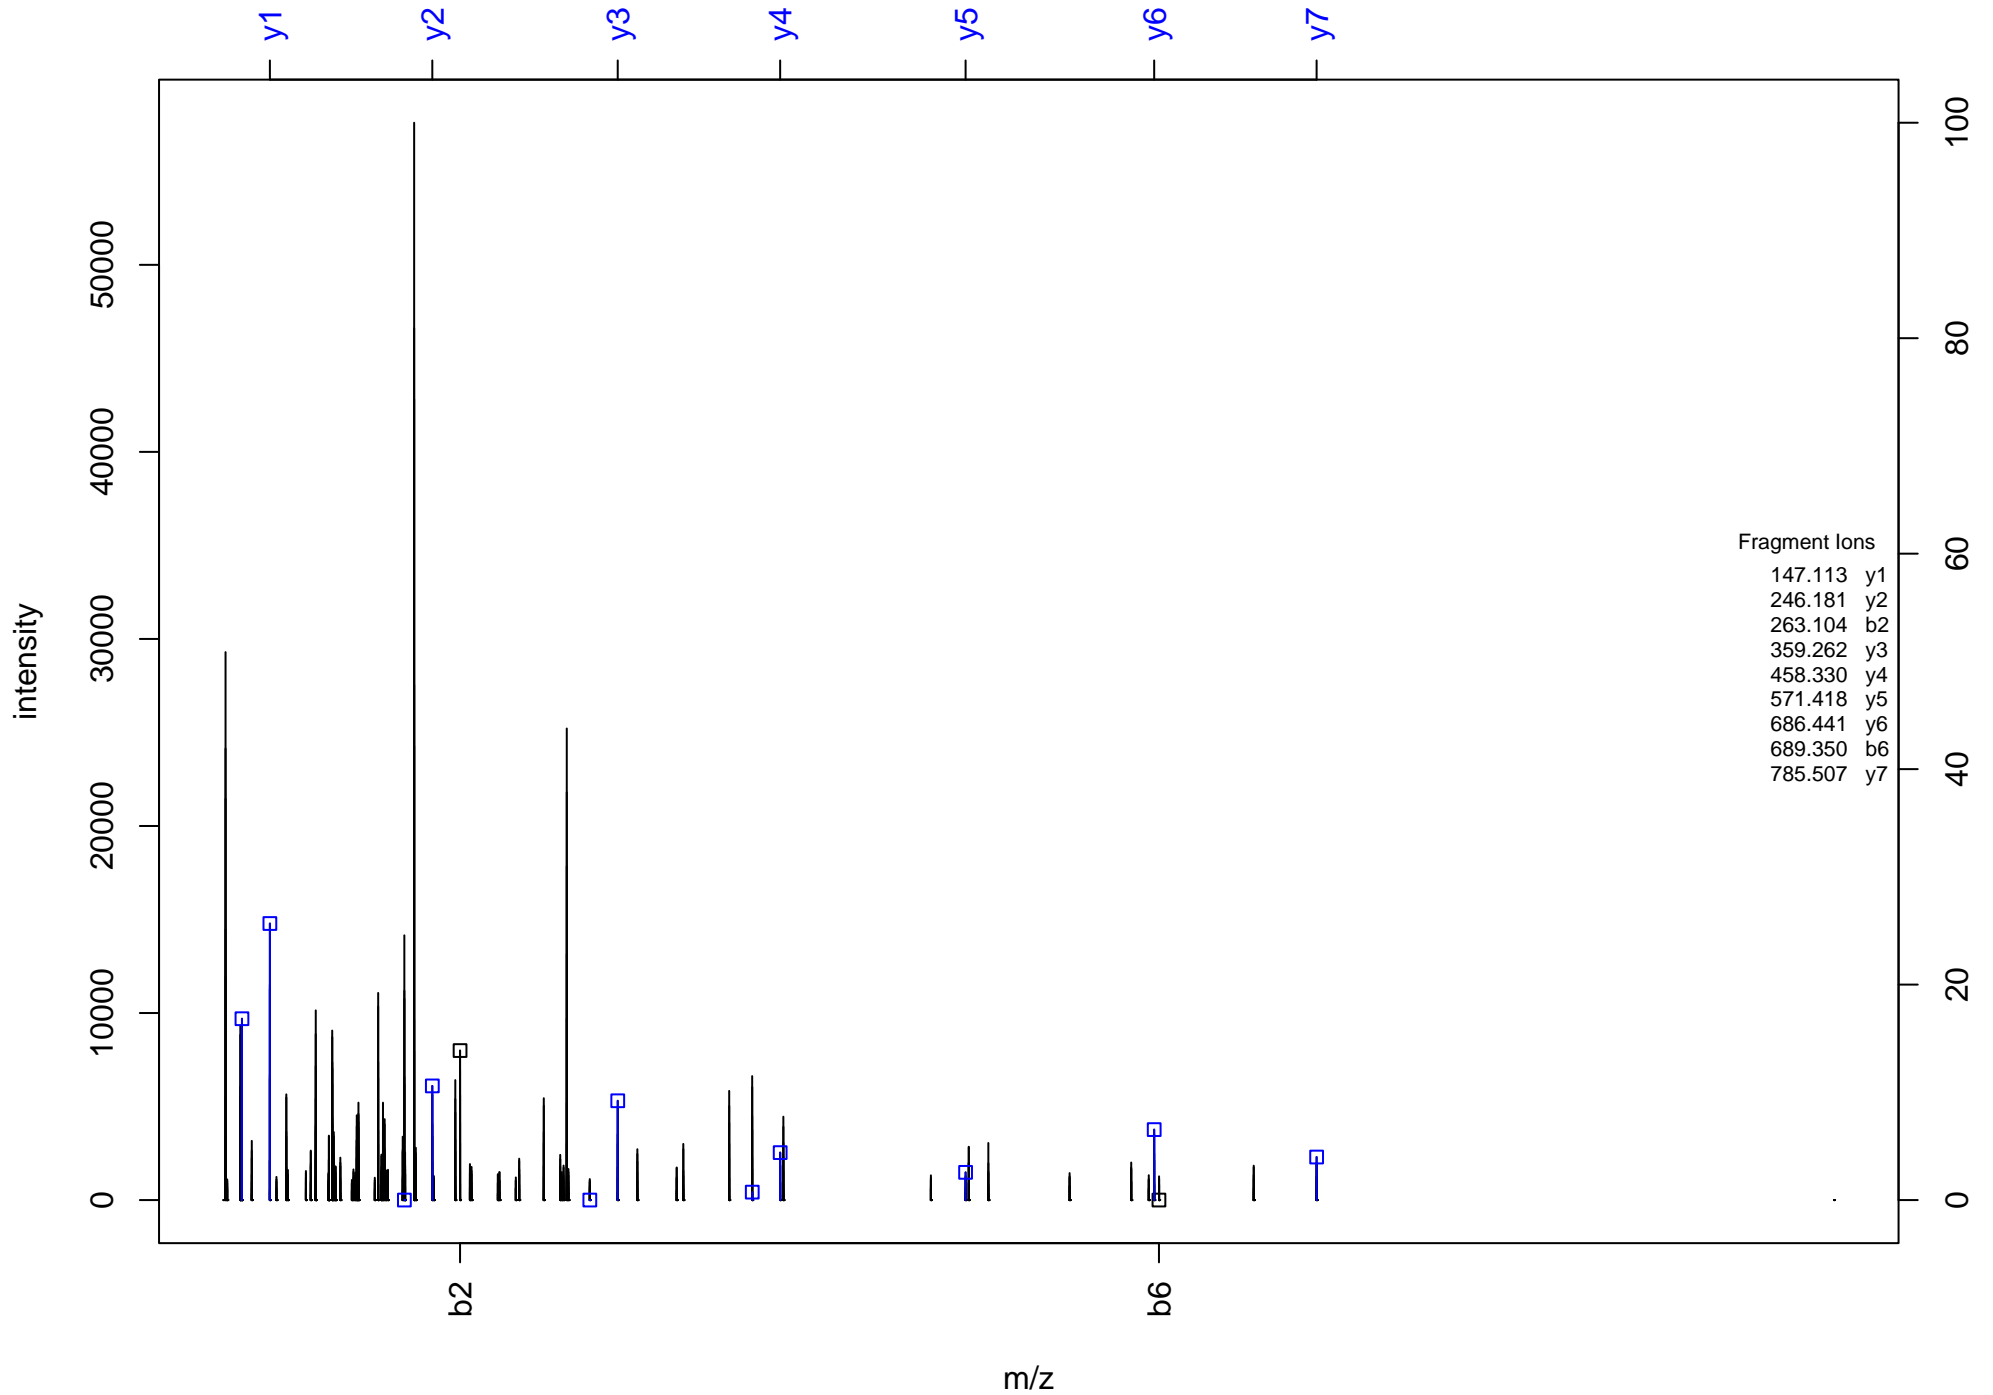



# DLAEDLYDGQVLQK

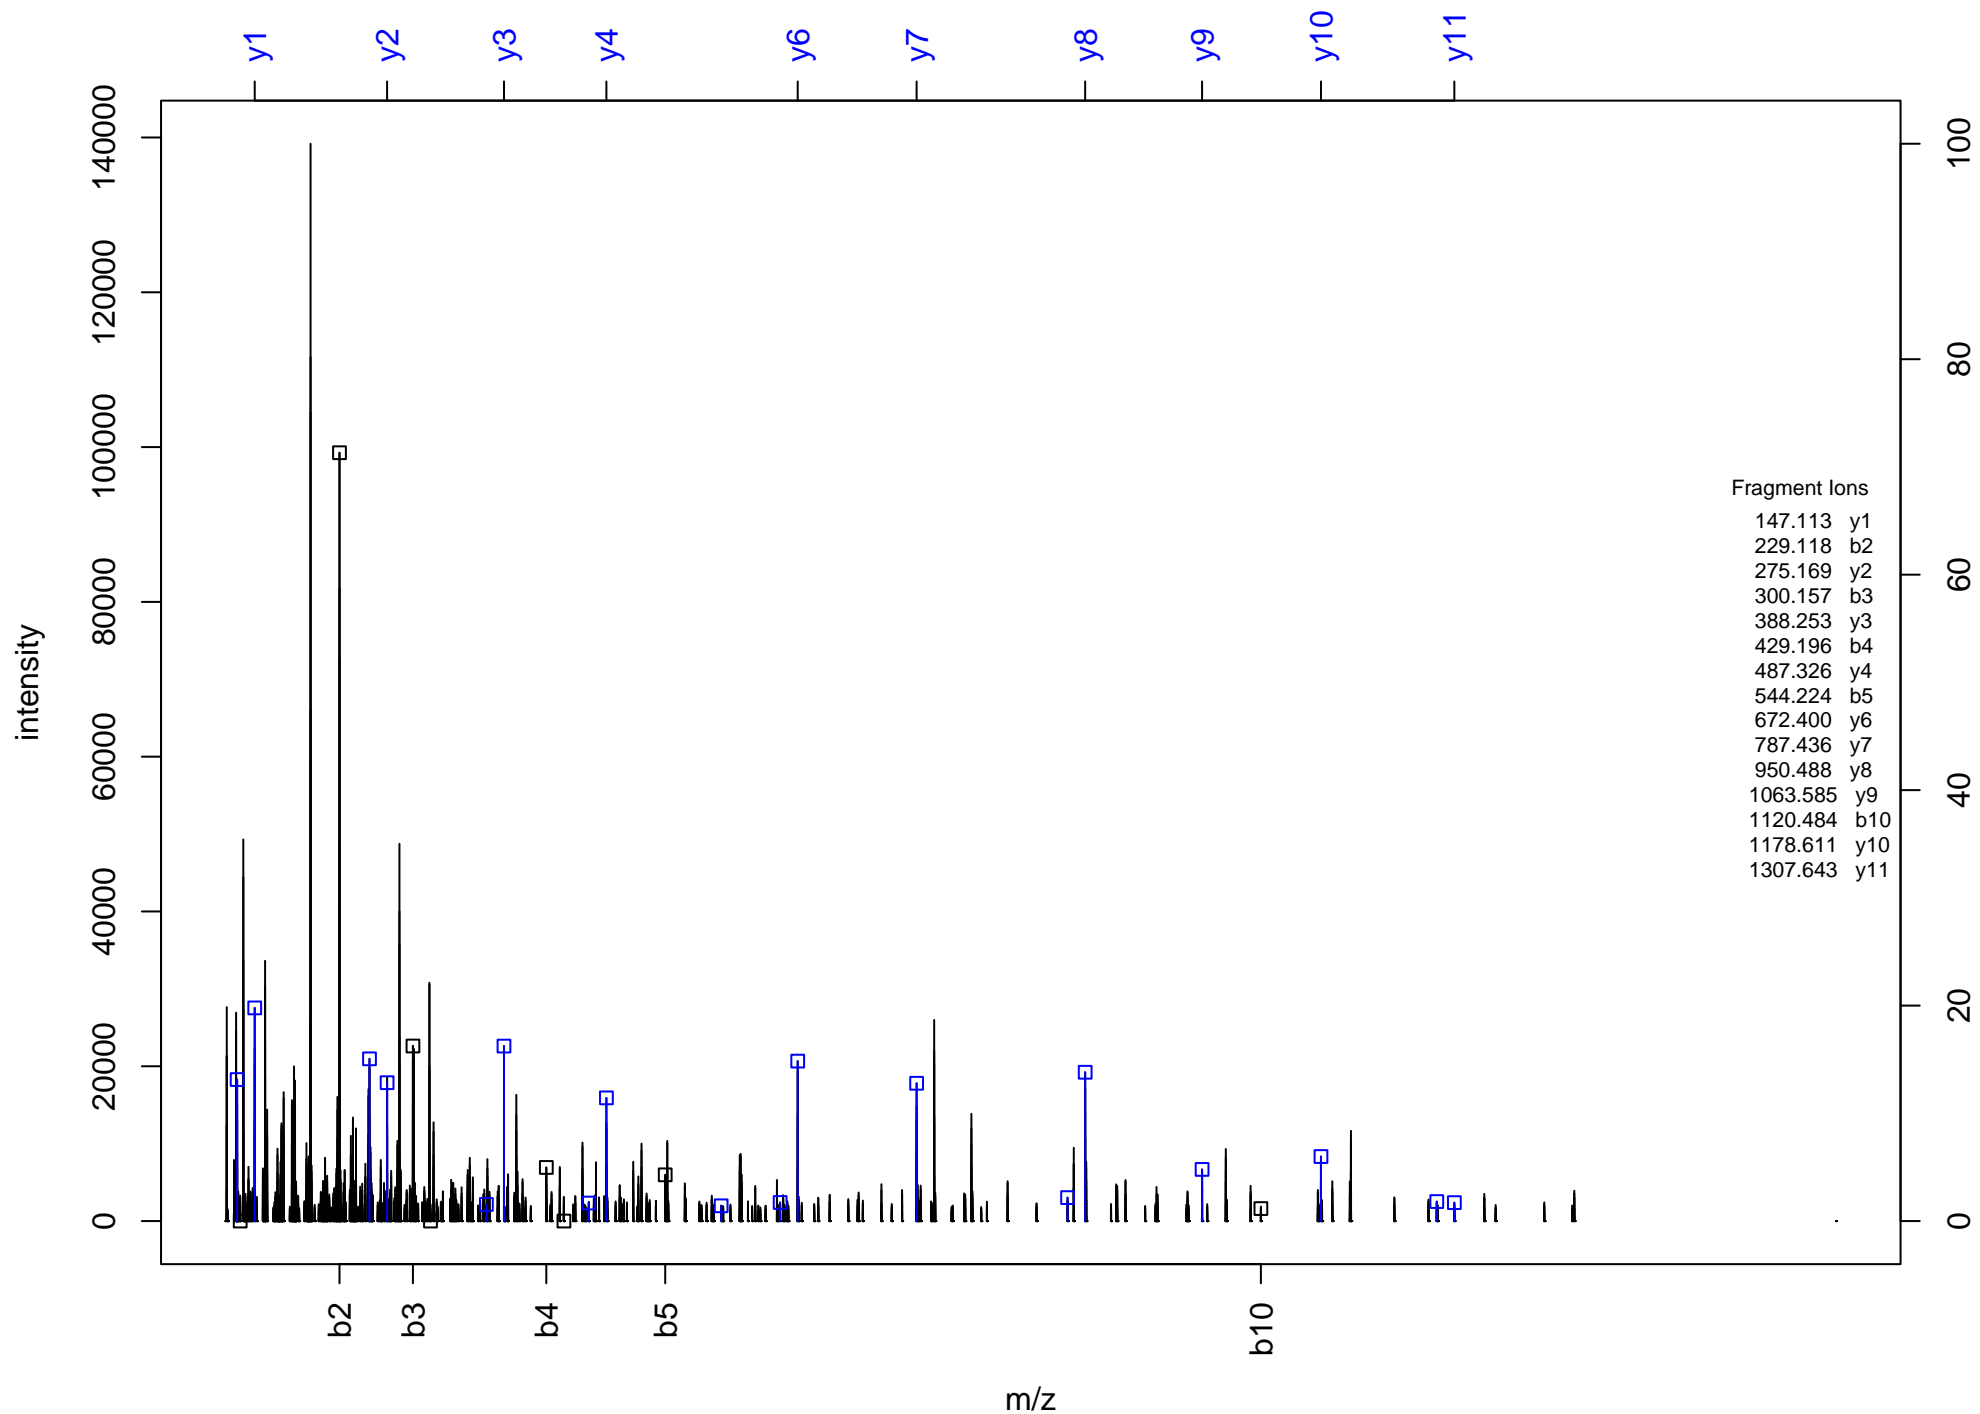

# LQ<sup>^</sup>DKRMEIDK

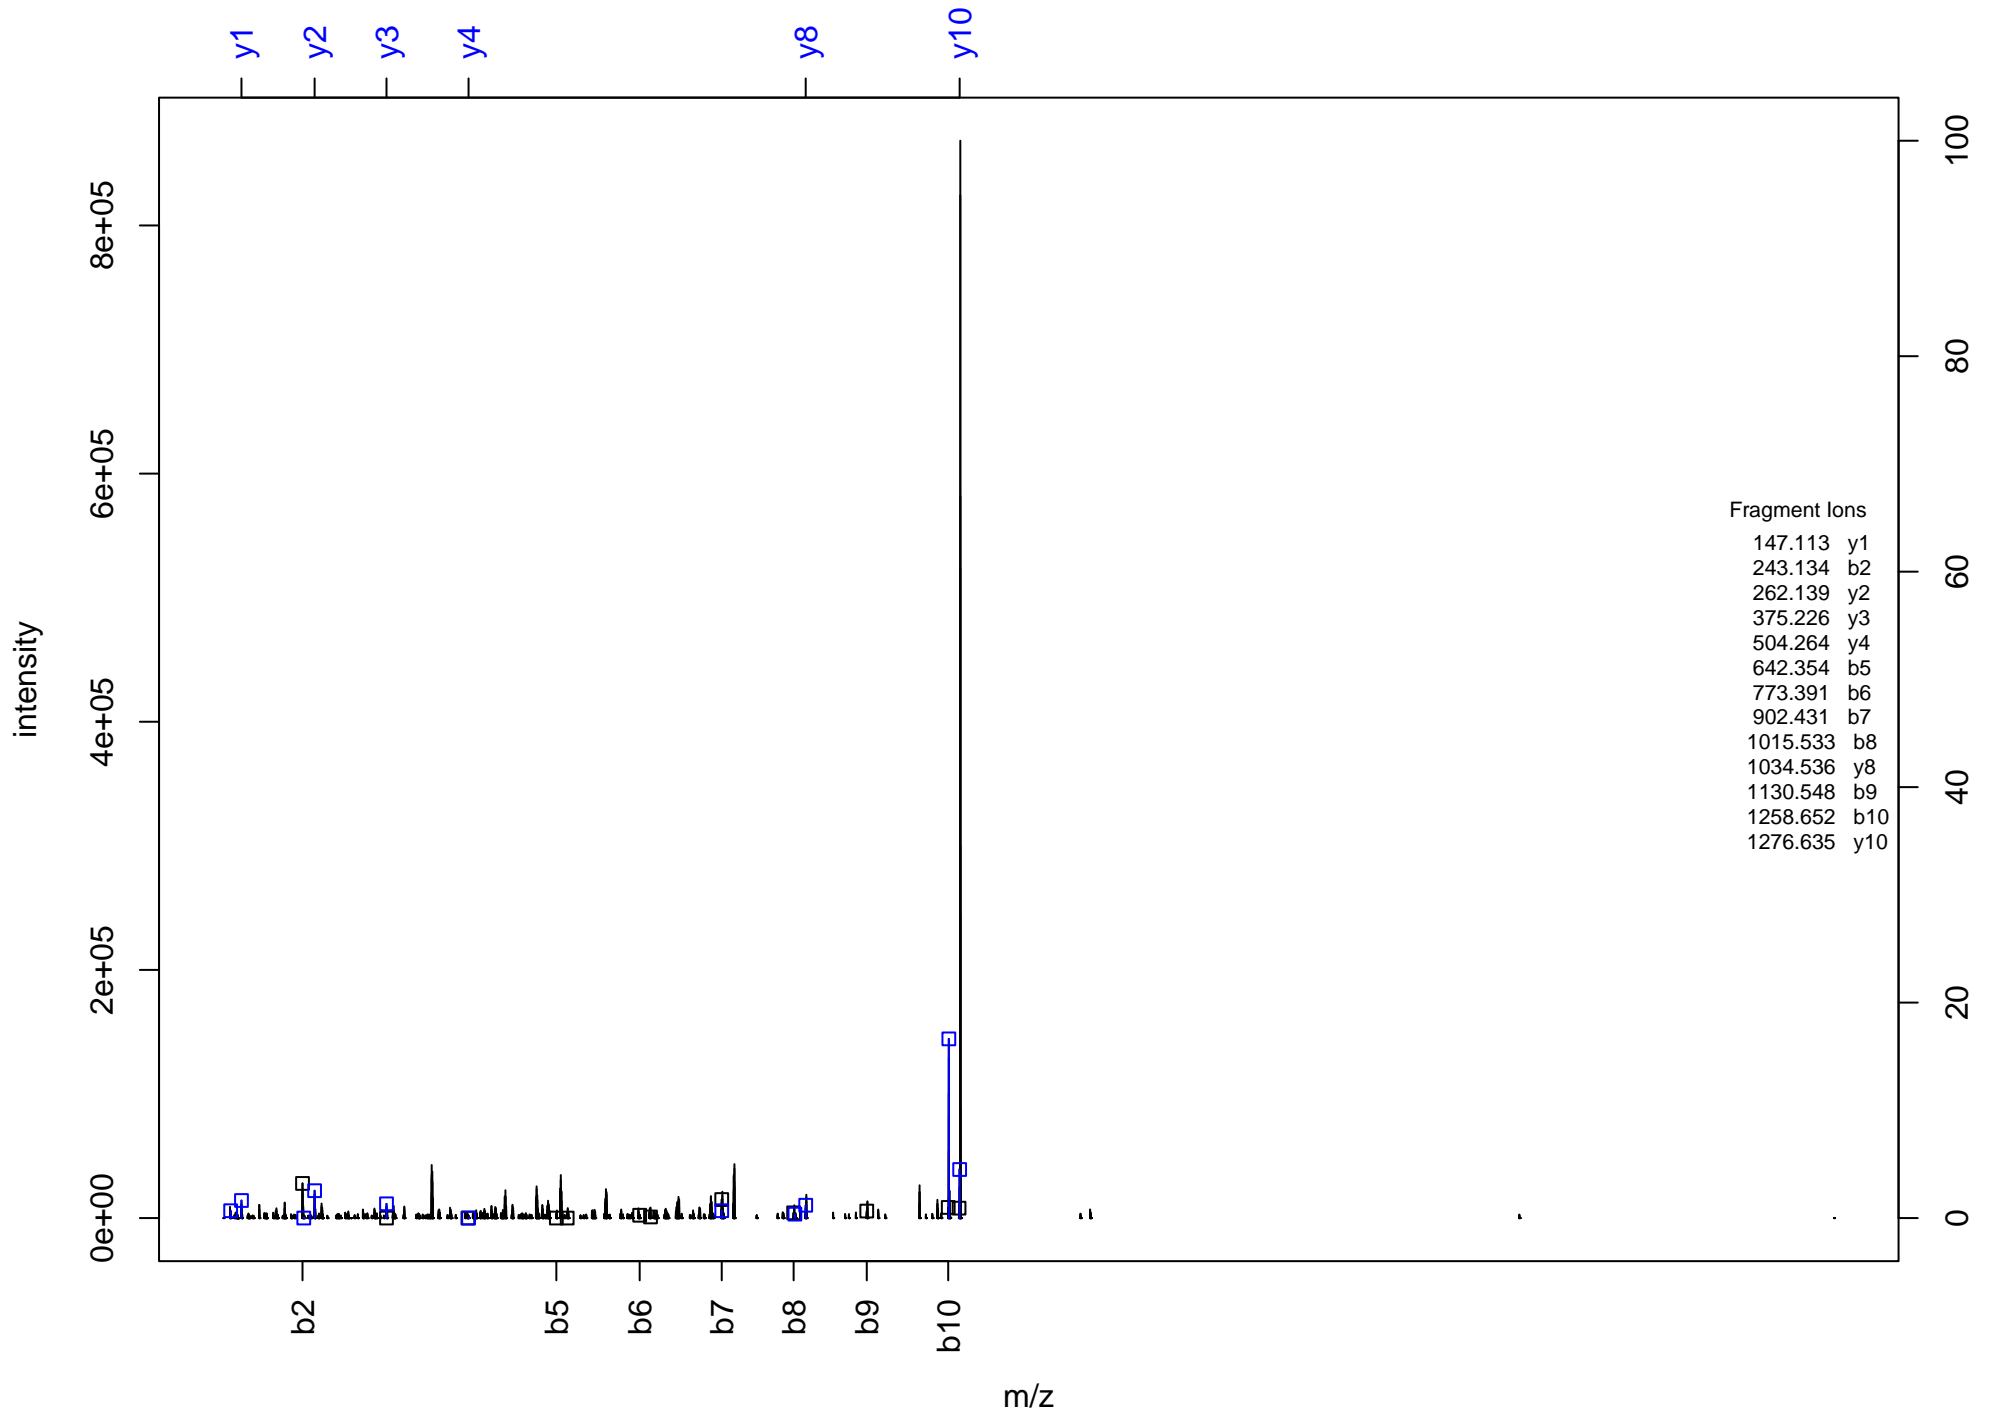

# FIPSMALR

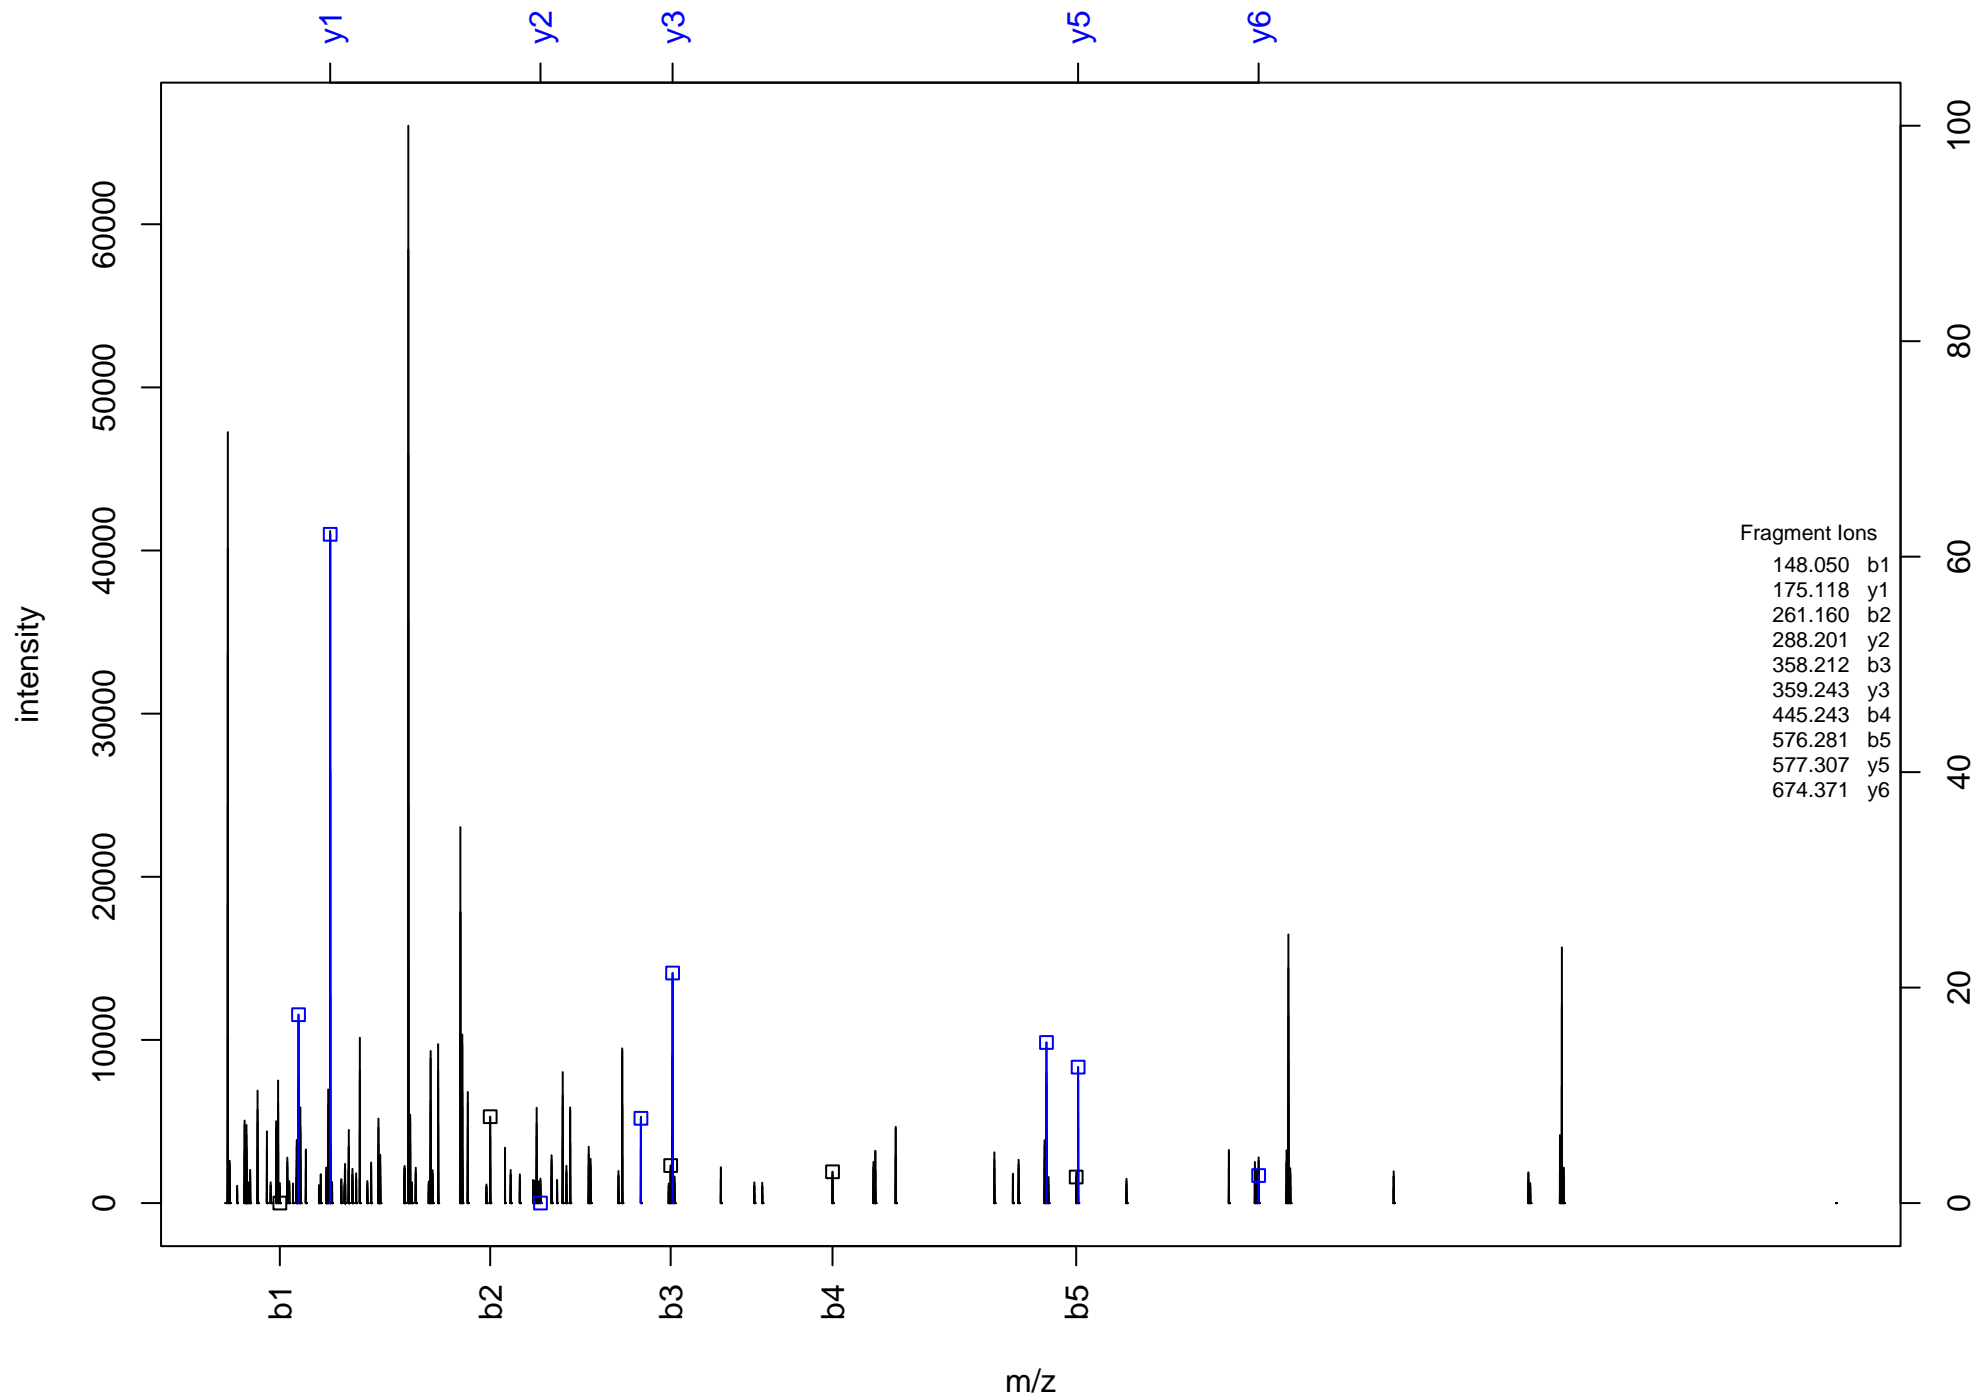

# SFFDNISSELK

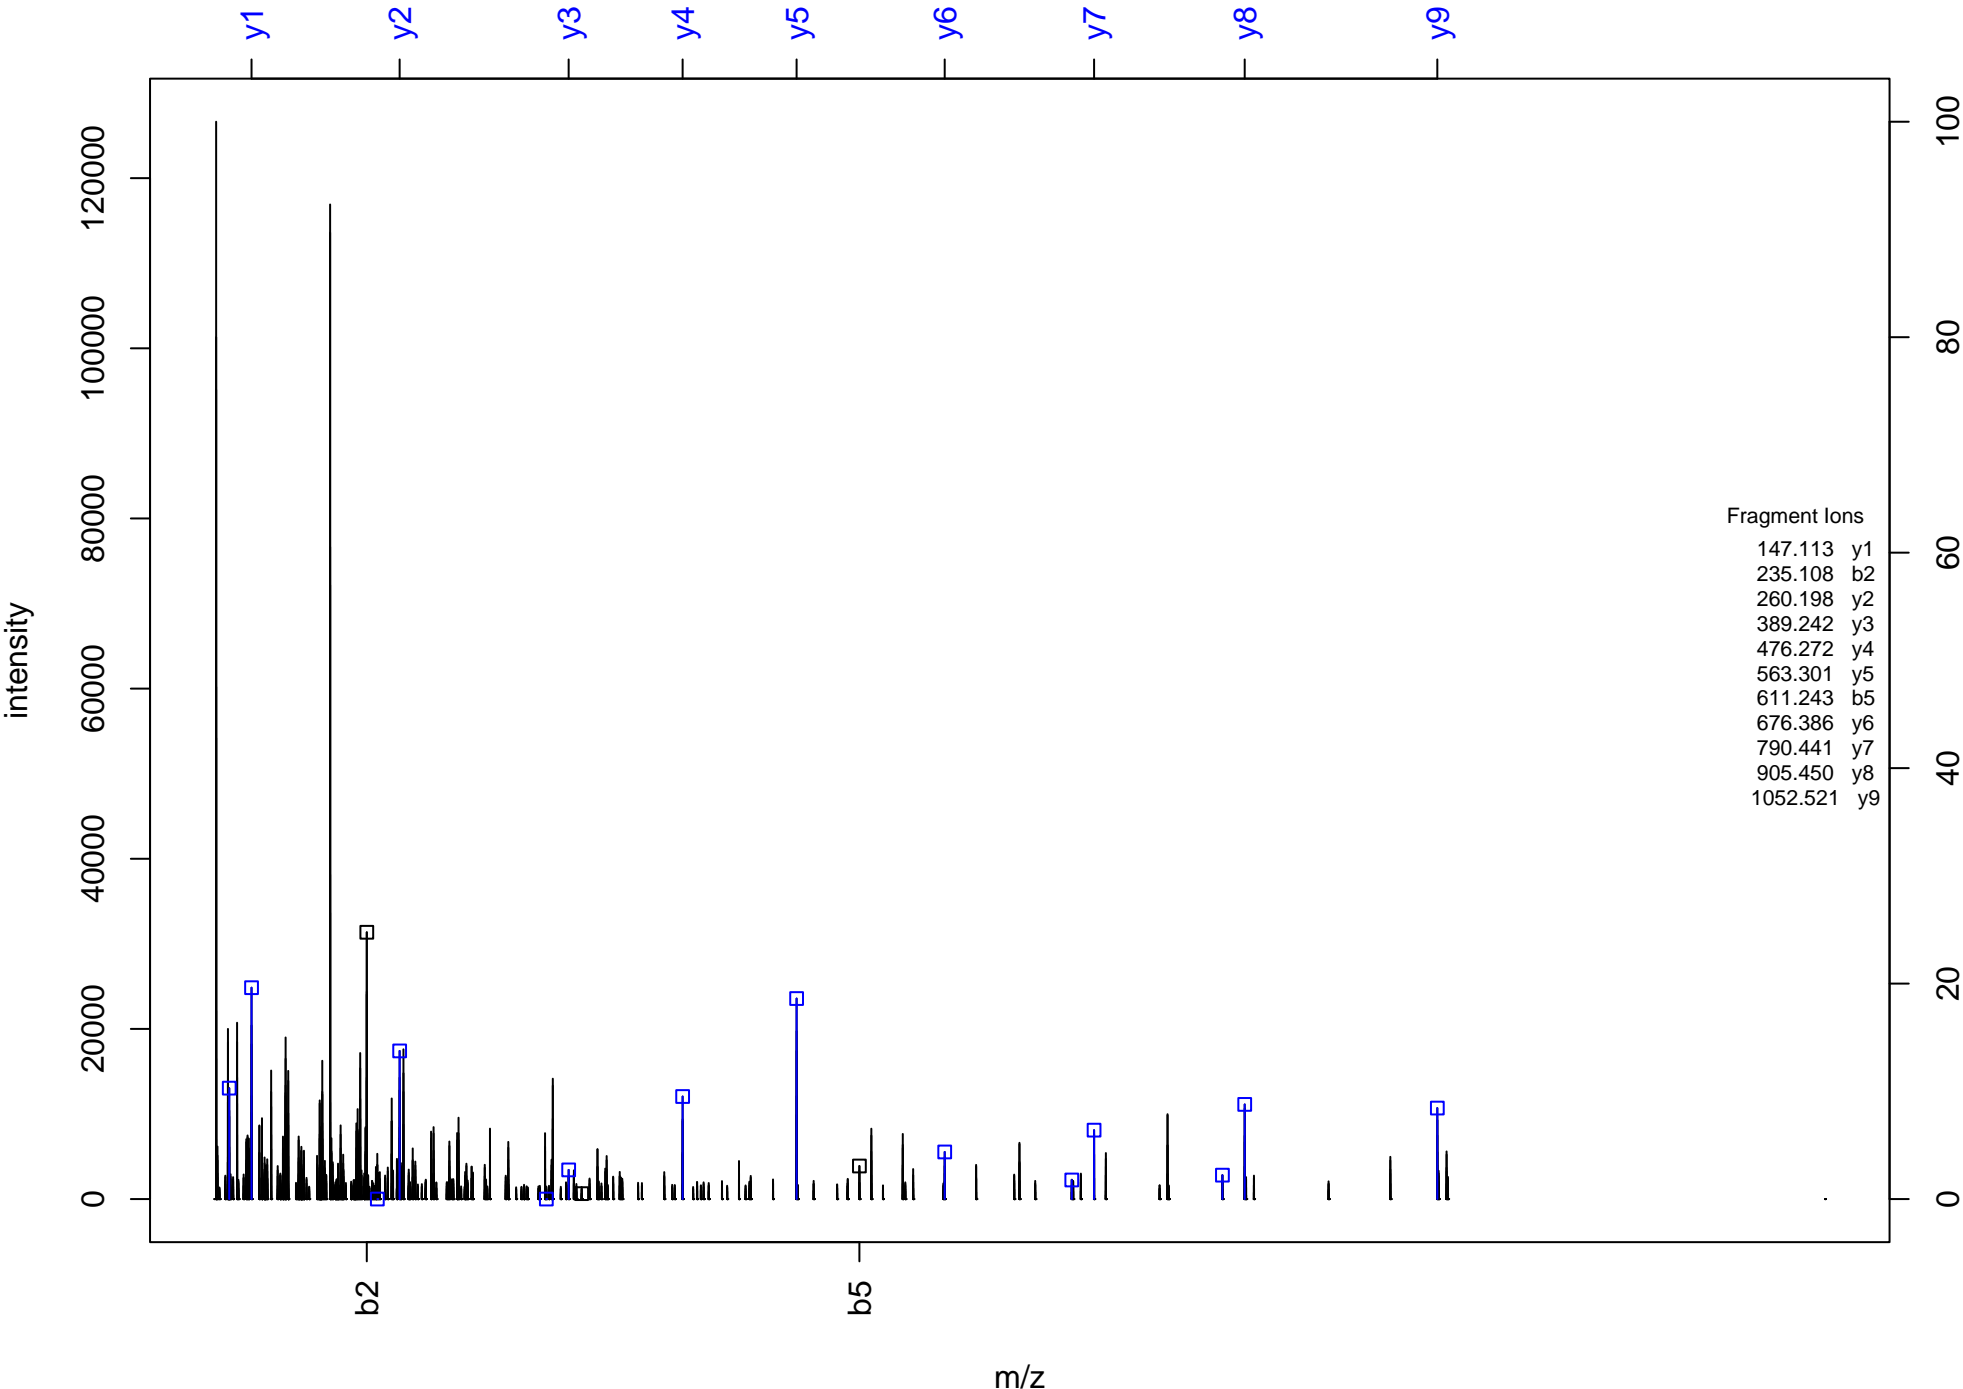

# LYSLLFR

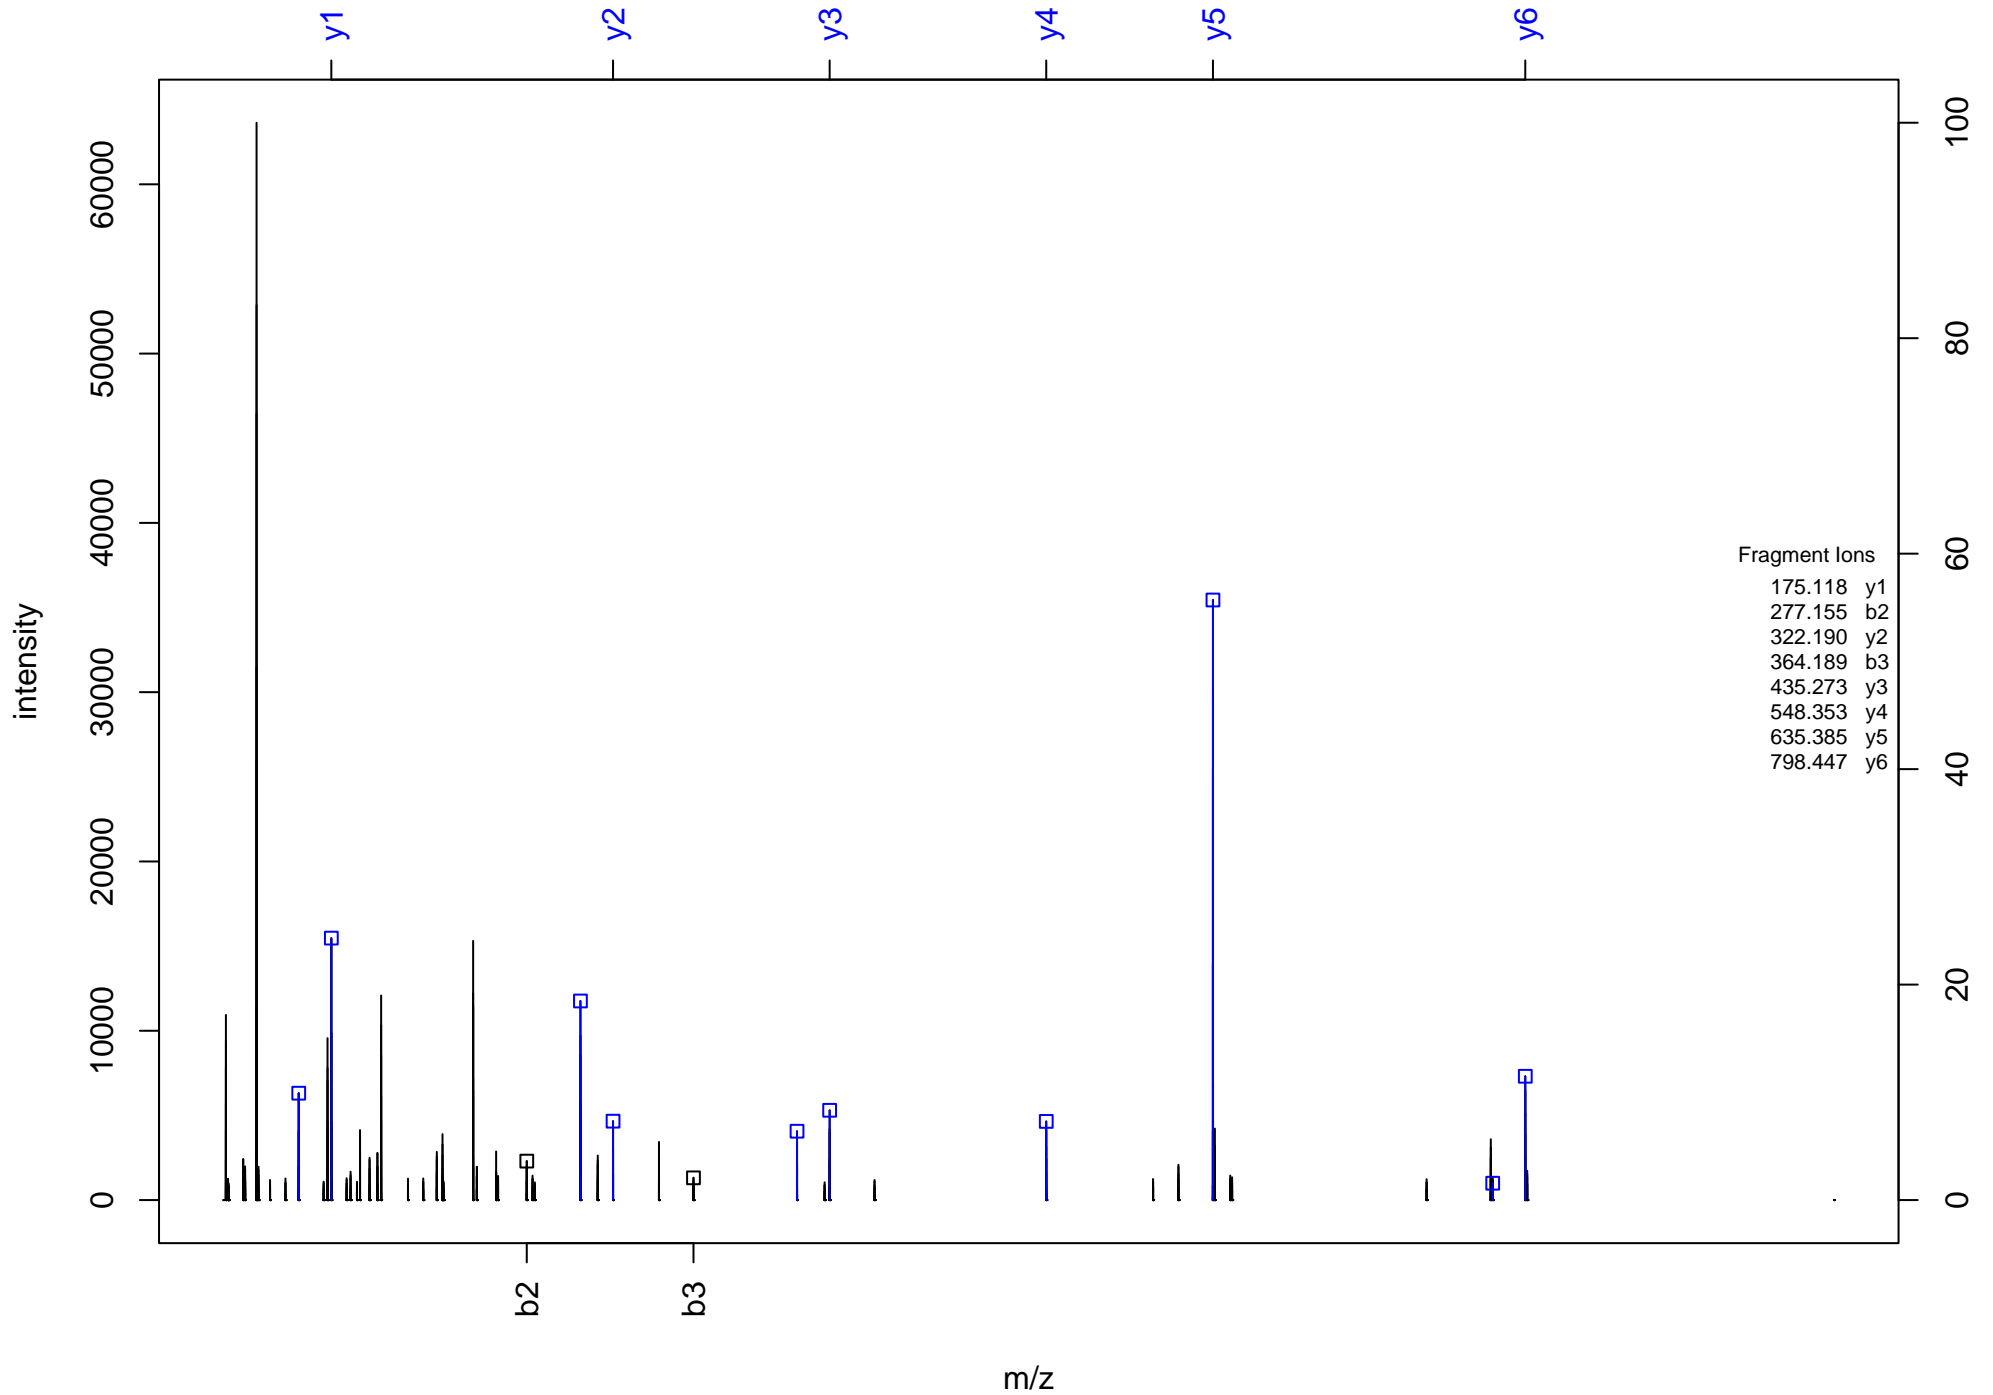

# ALCDVGTAISCSR

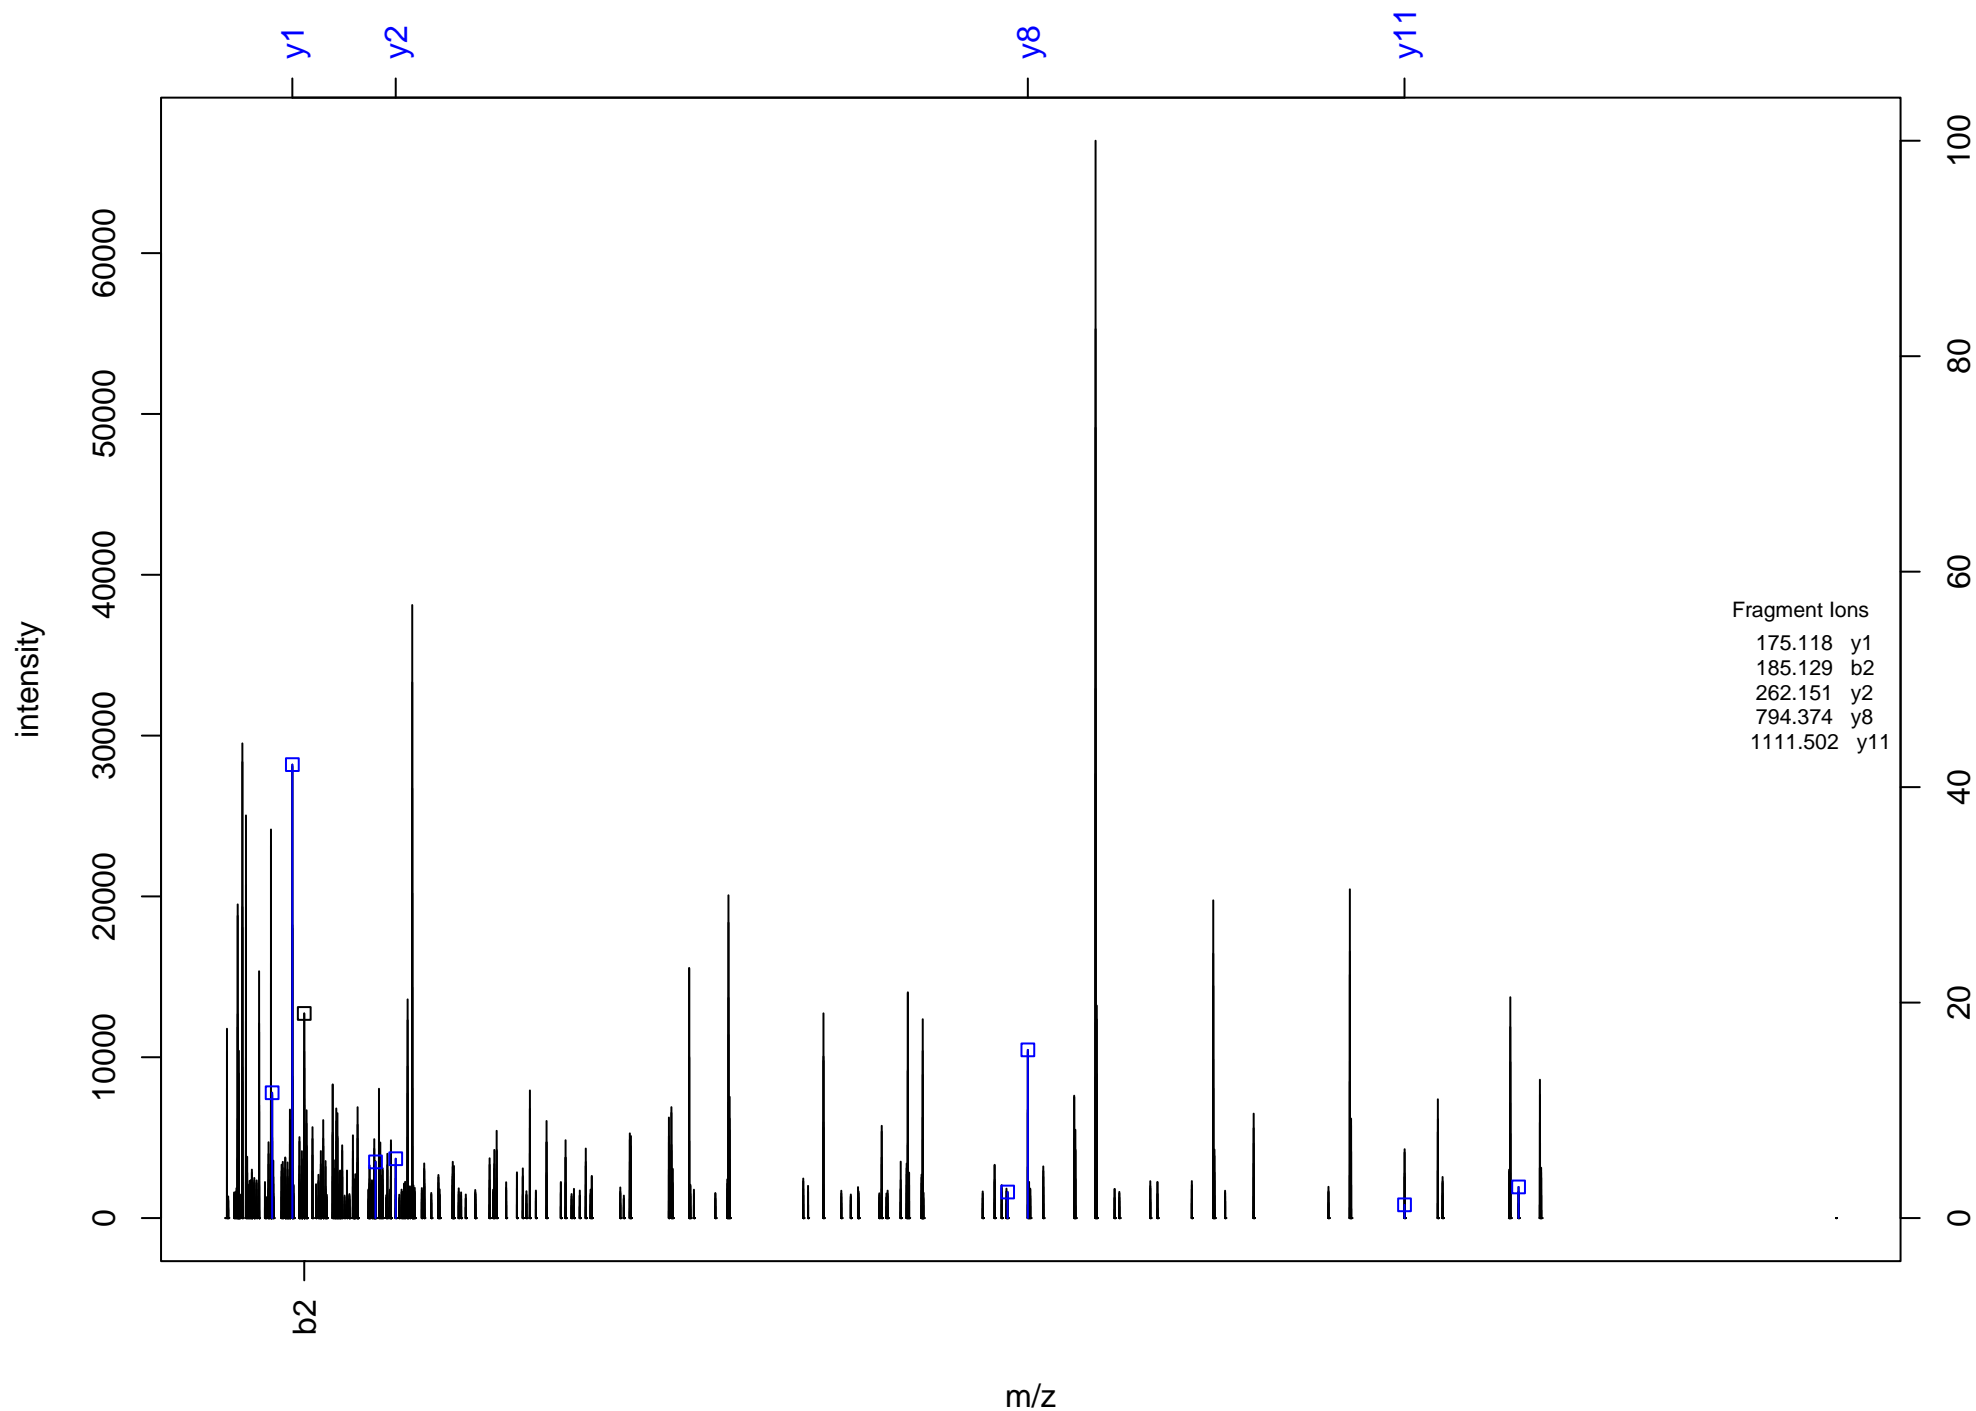

Fragment Ions  
175.118 y1  
185.129 b2  
262.151 y2  
794.374 y8  
1111.502 y11

# EEN^SAFIFKQ^EEK

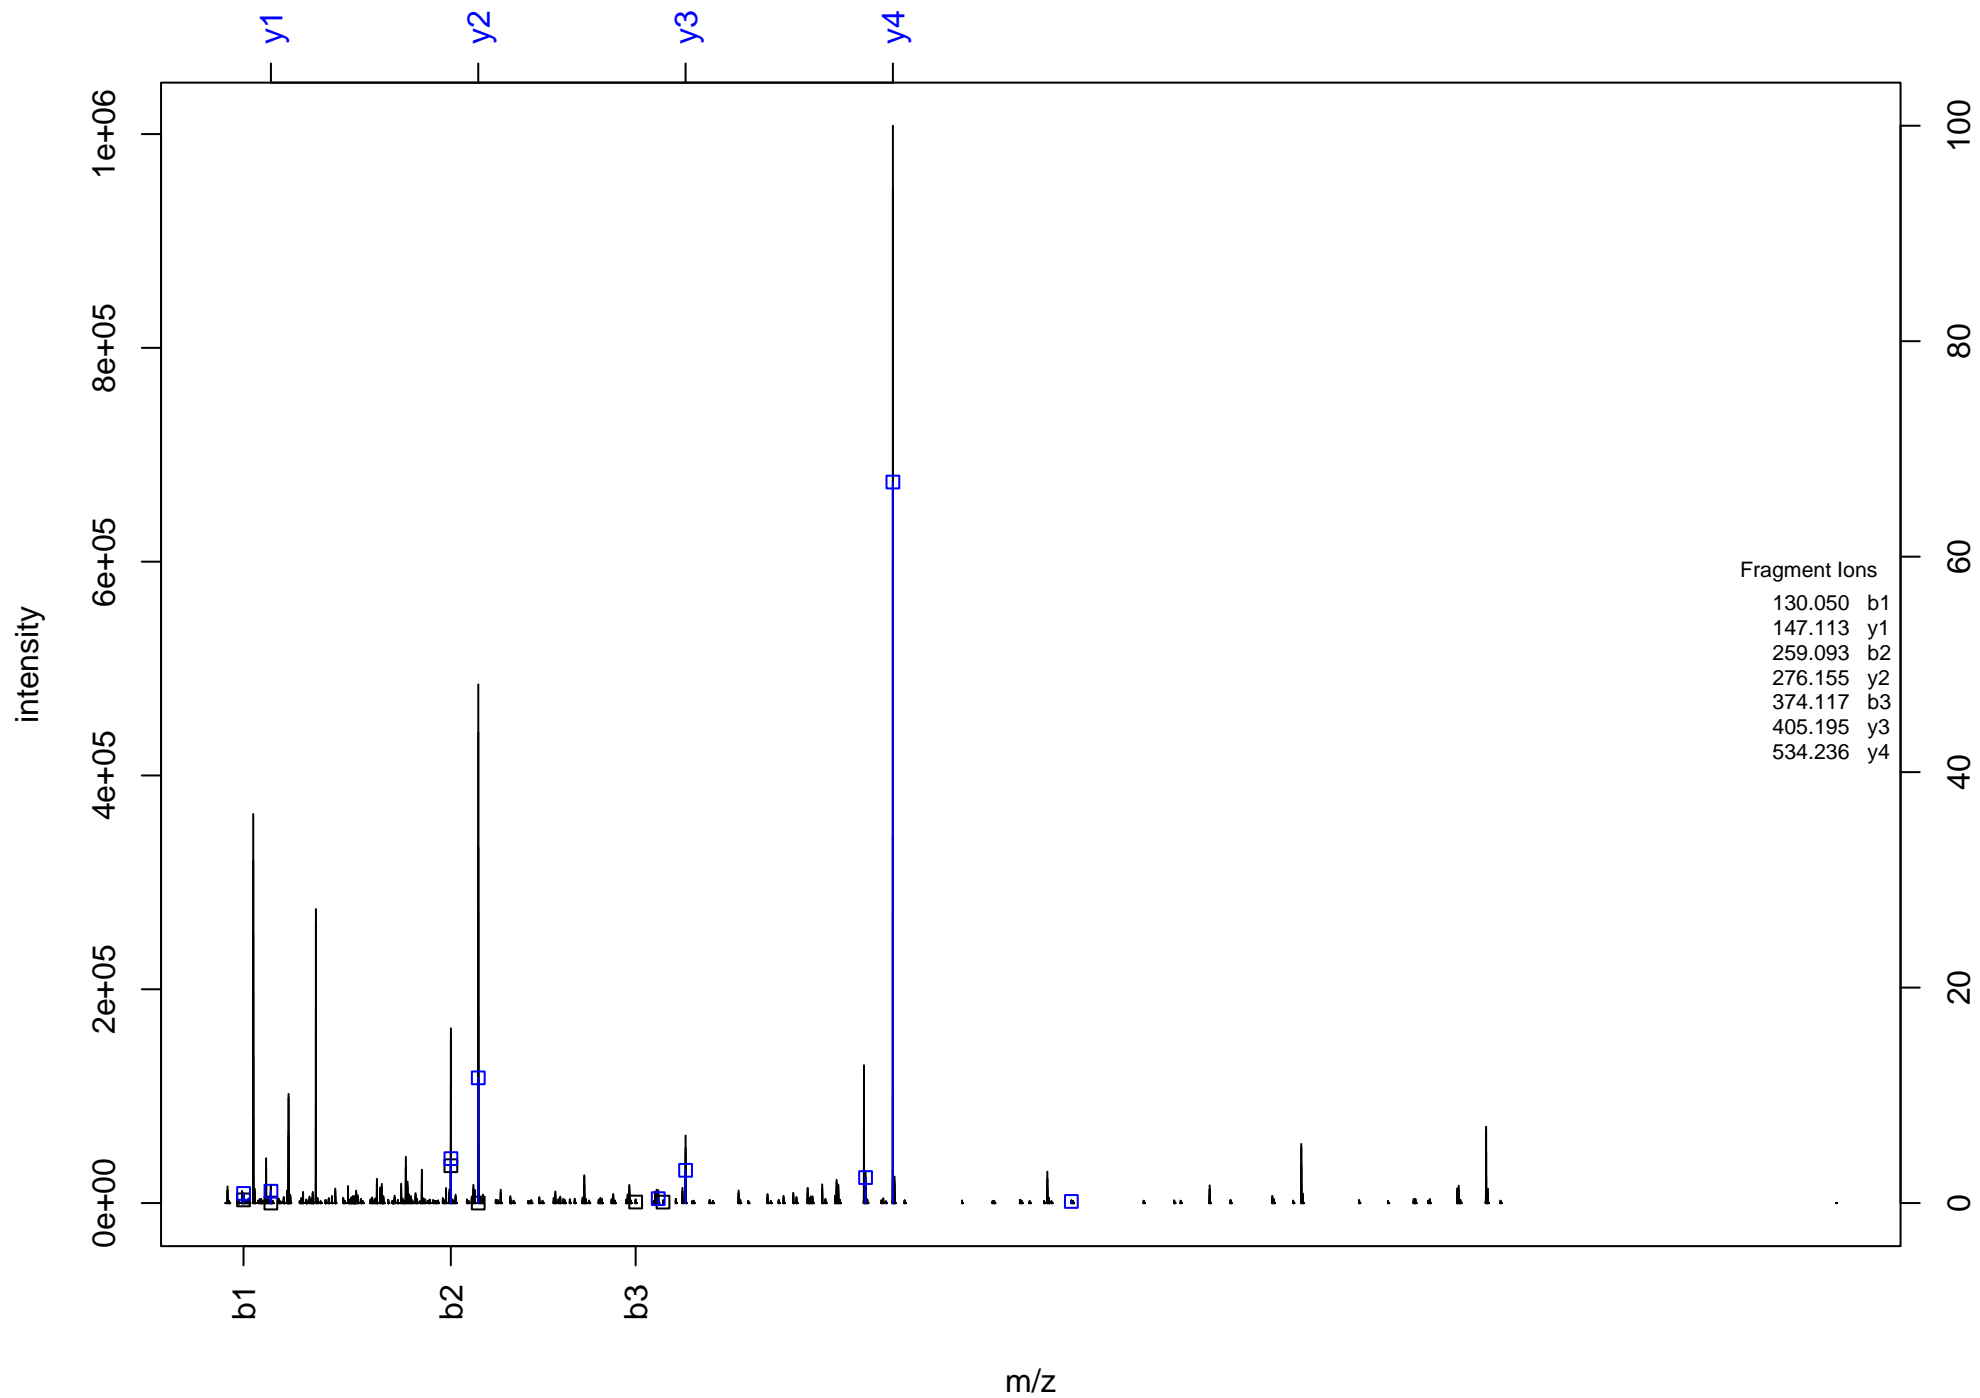

# ELVN^YGAN^VN^AQ^SQ^K

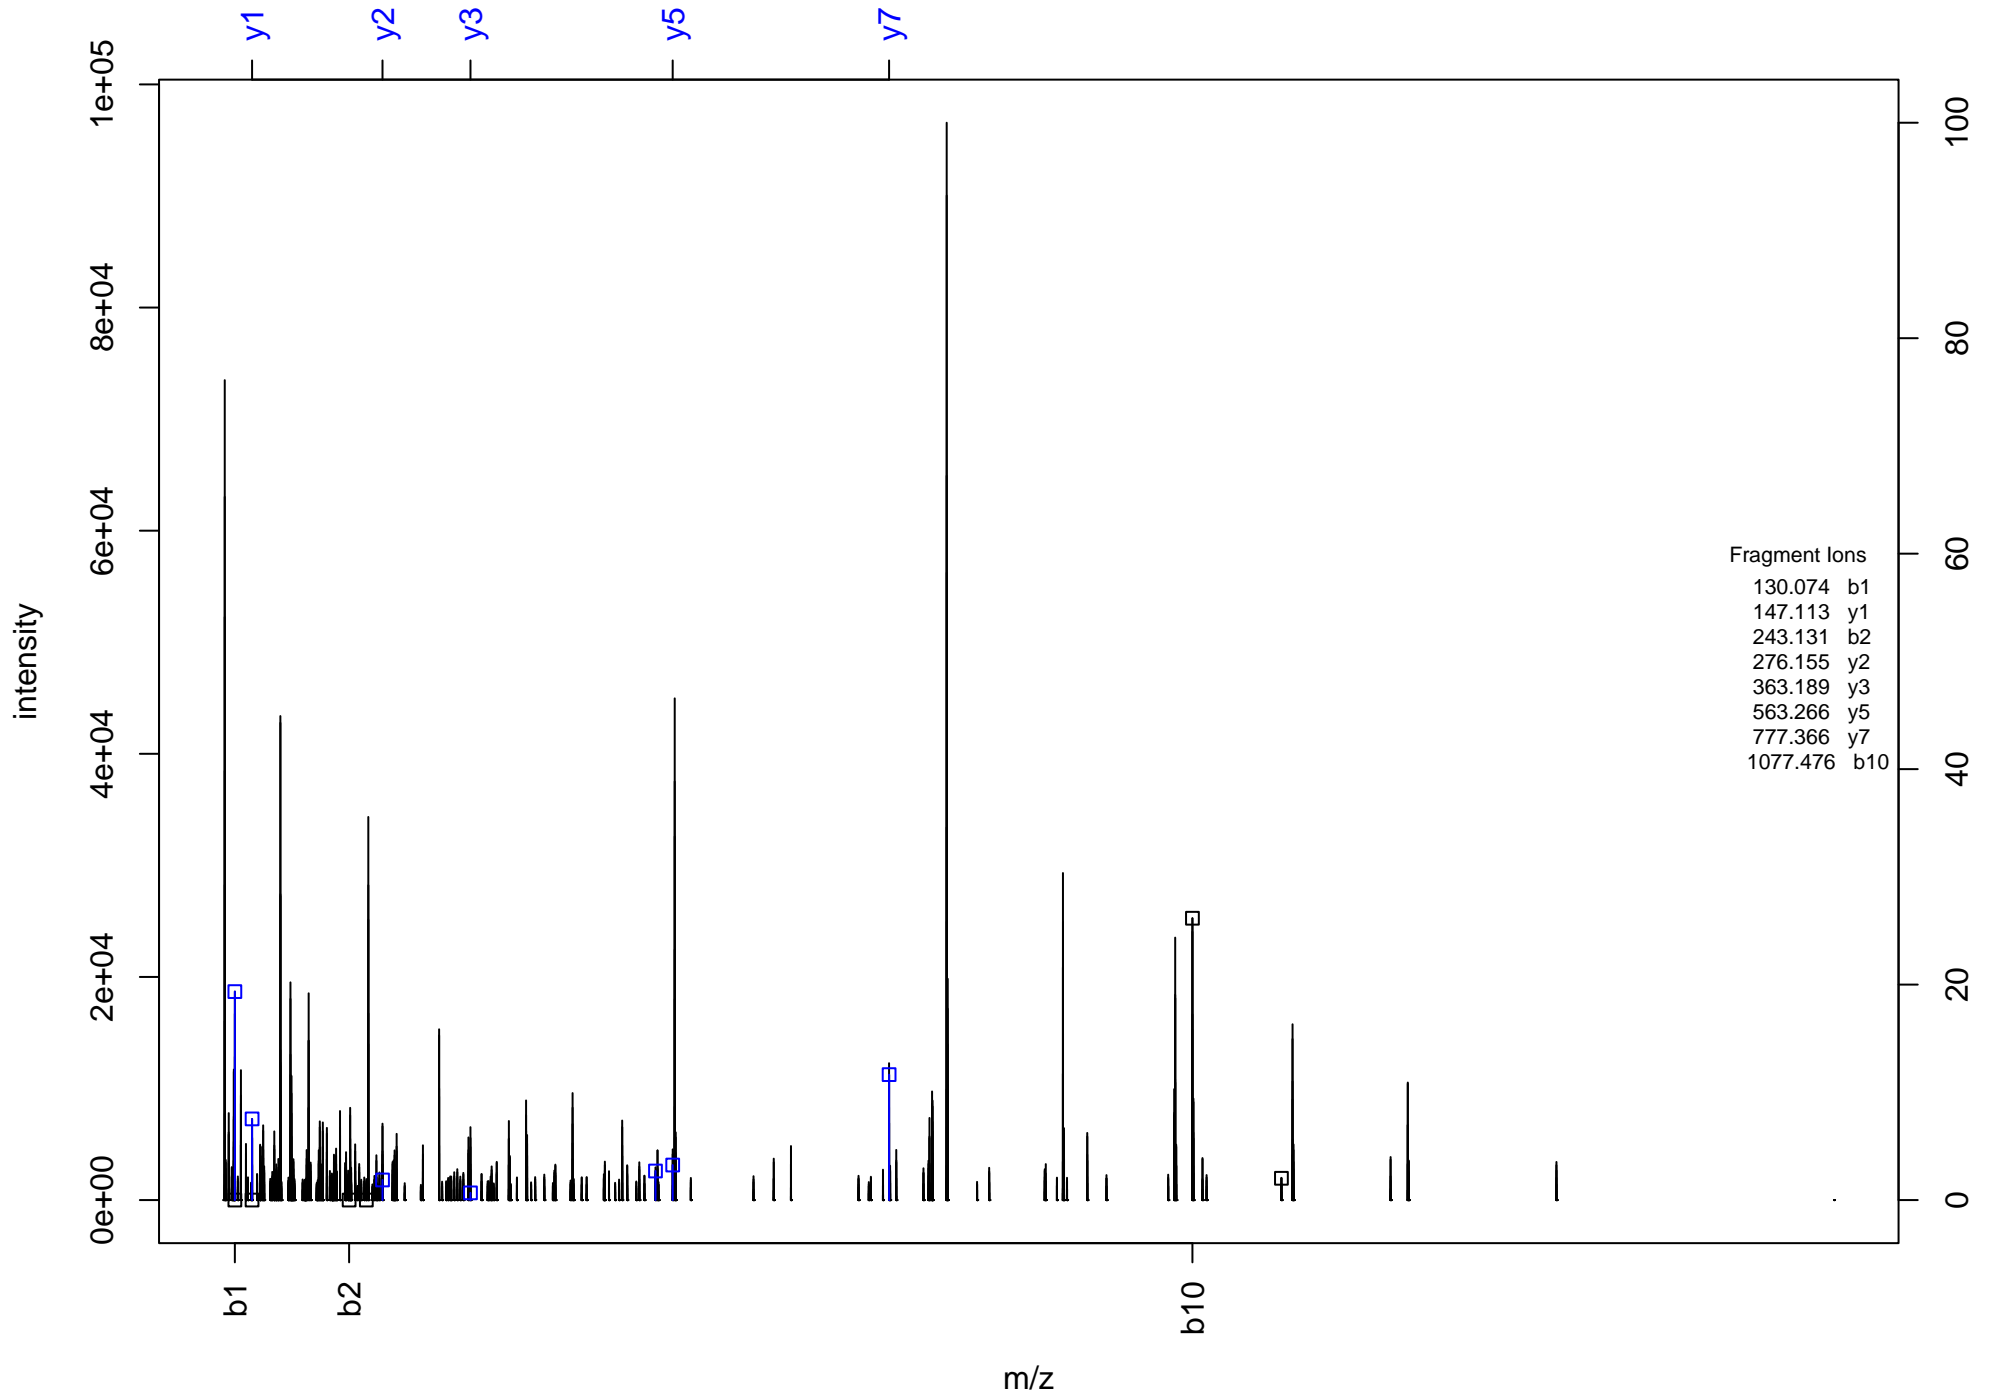



# (Ac)MELEAMSR

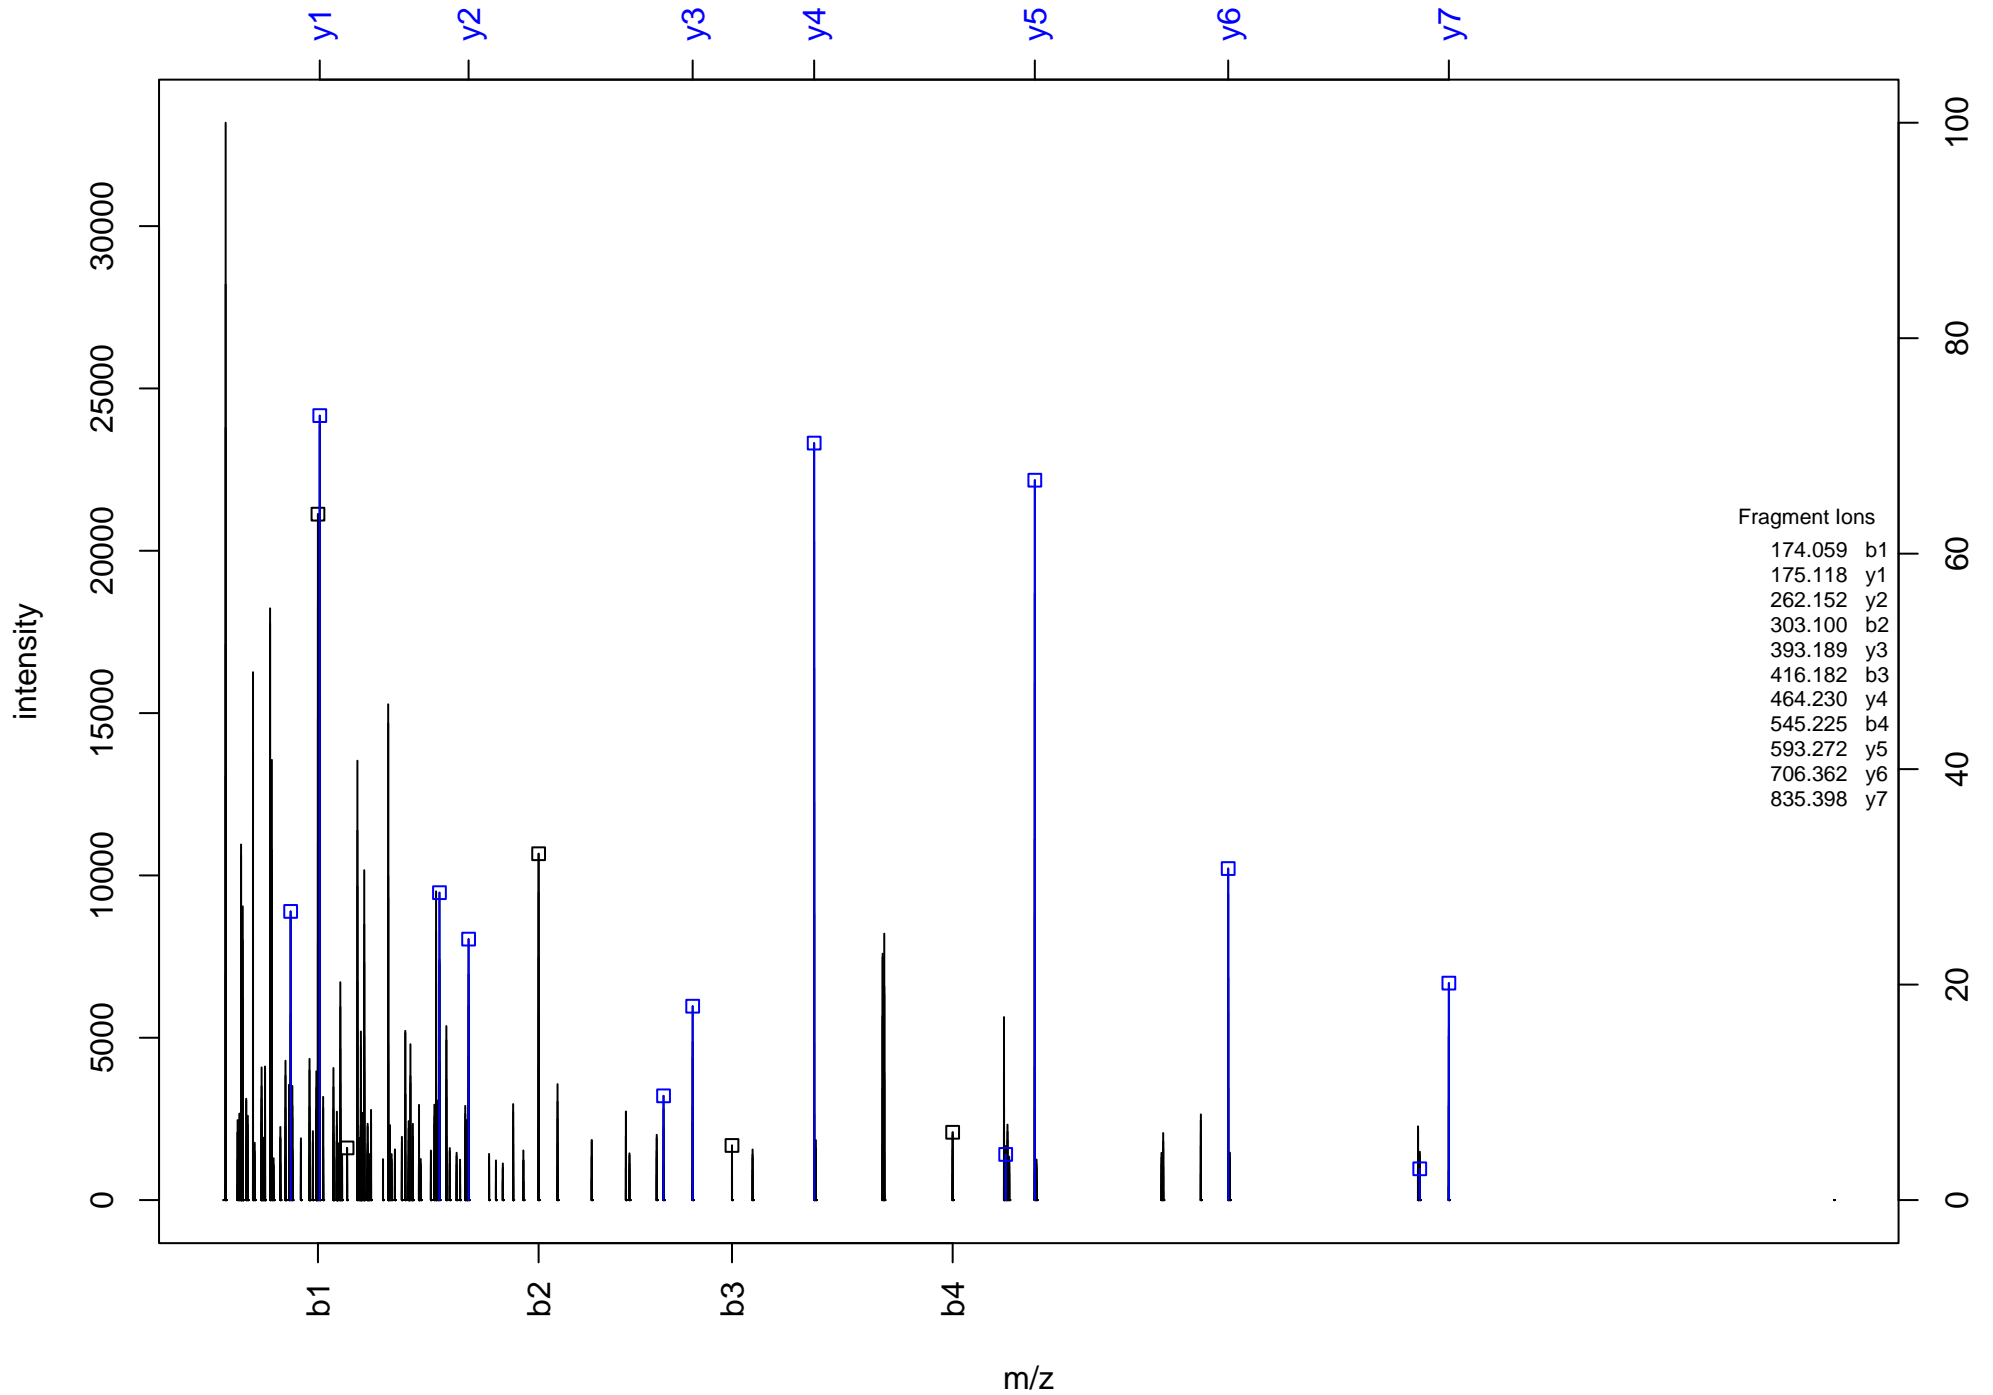

# WFNGQPIHAELSPVTD<sup>+</sup>FR

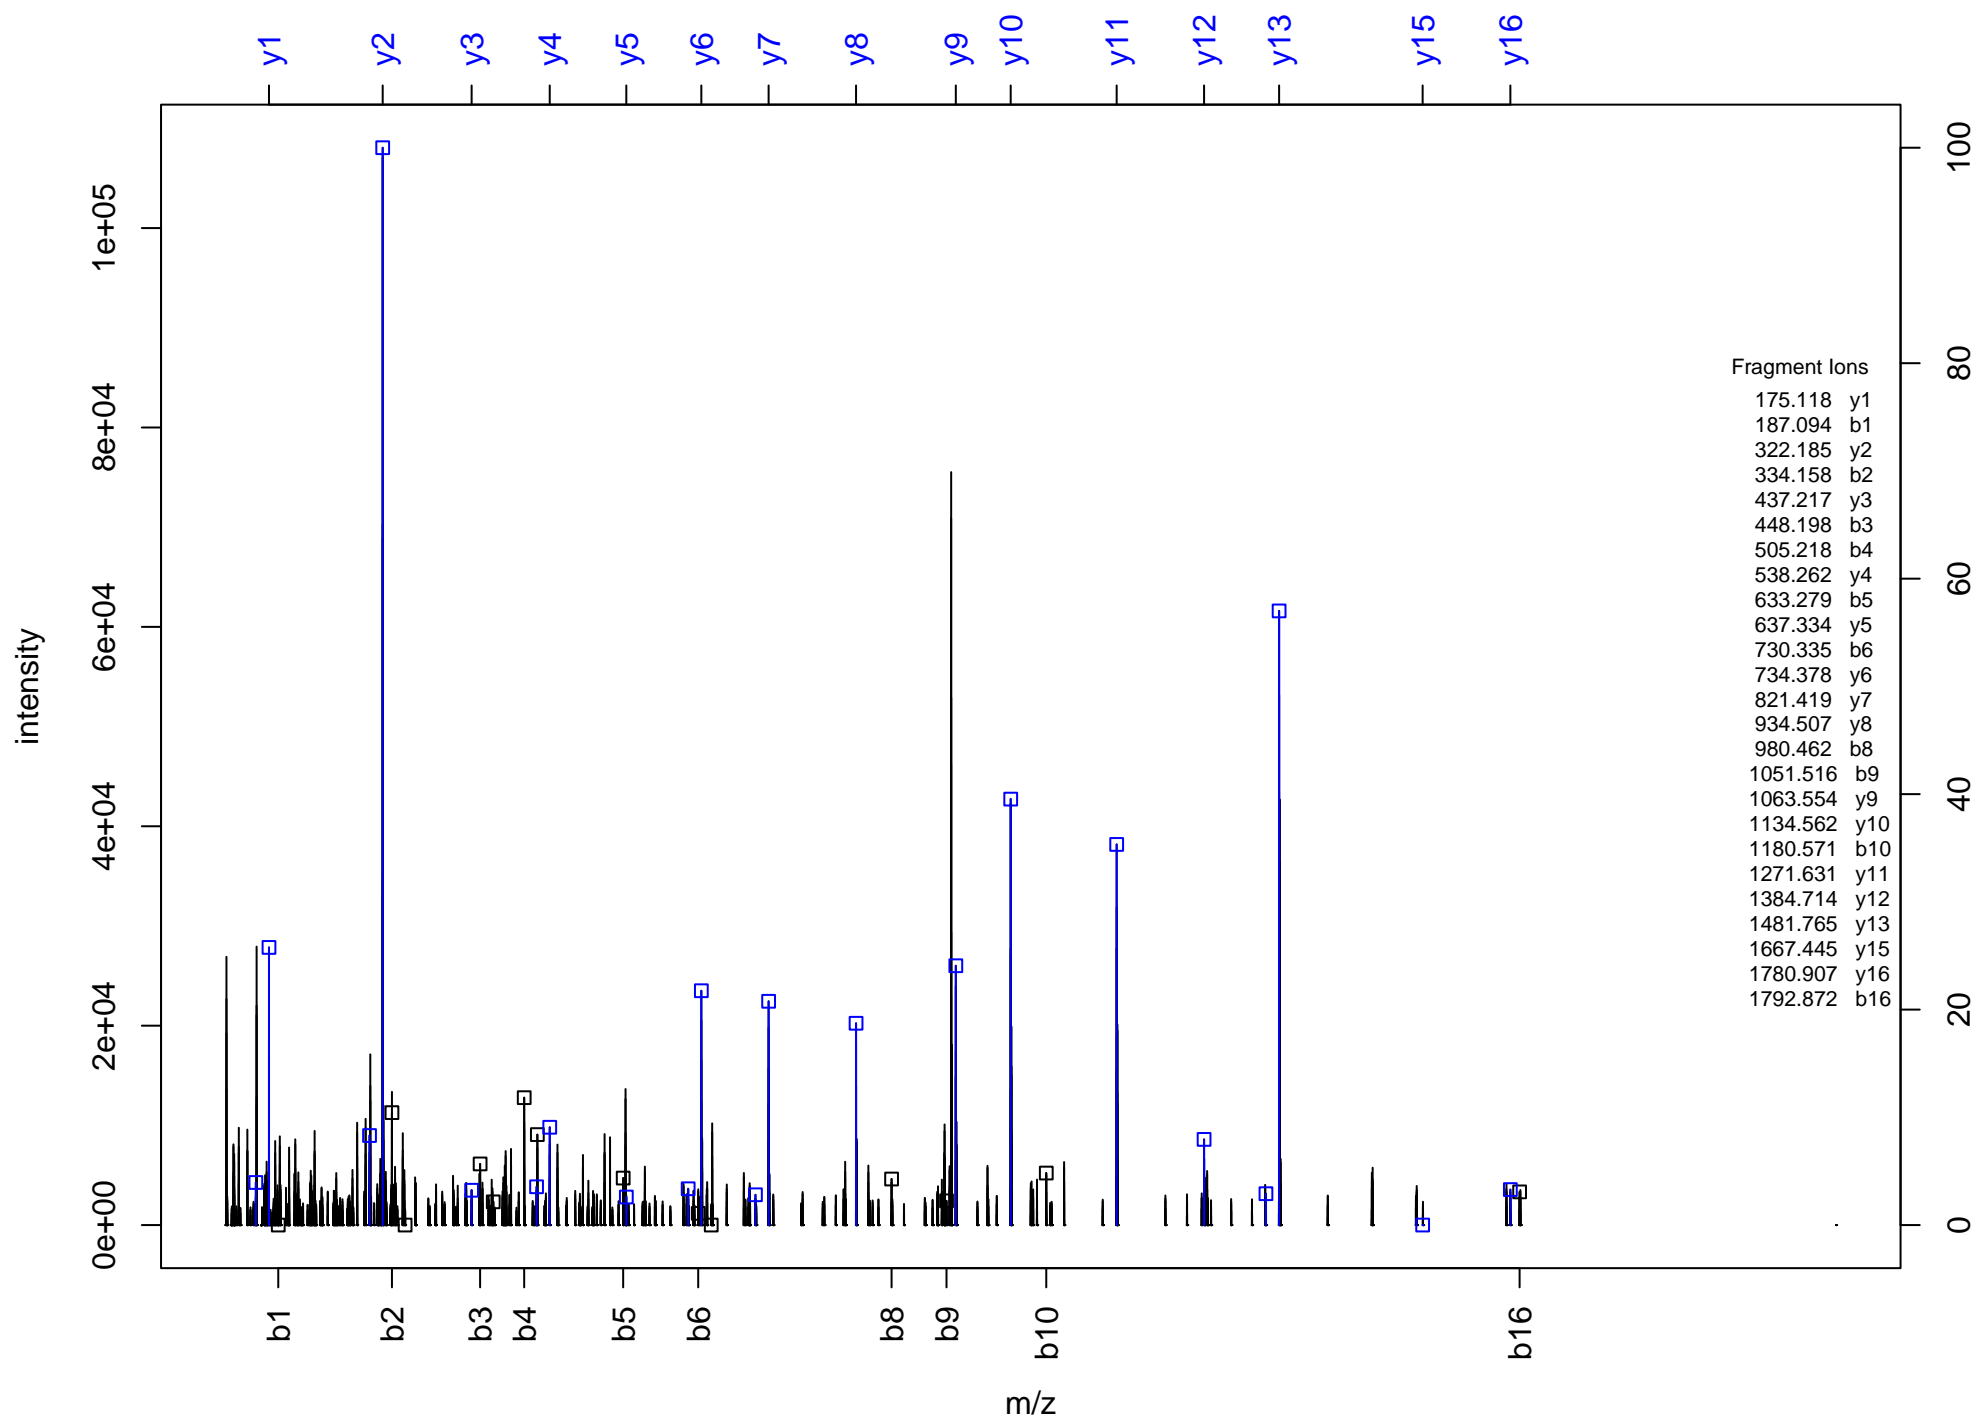

# HHTVLN^HSIKVM\*SHVEN^LSK

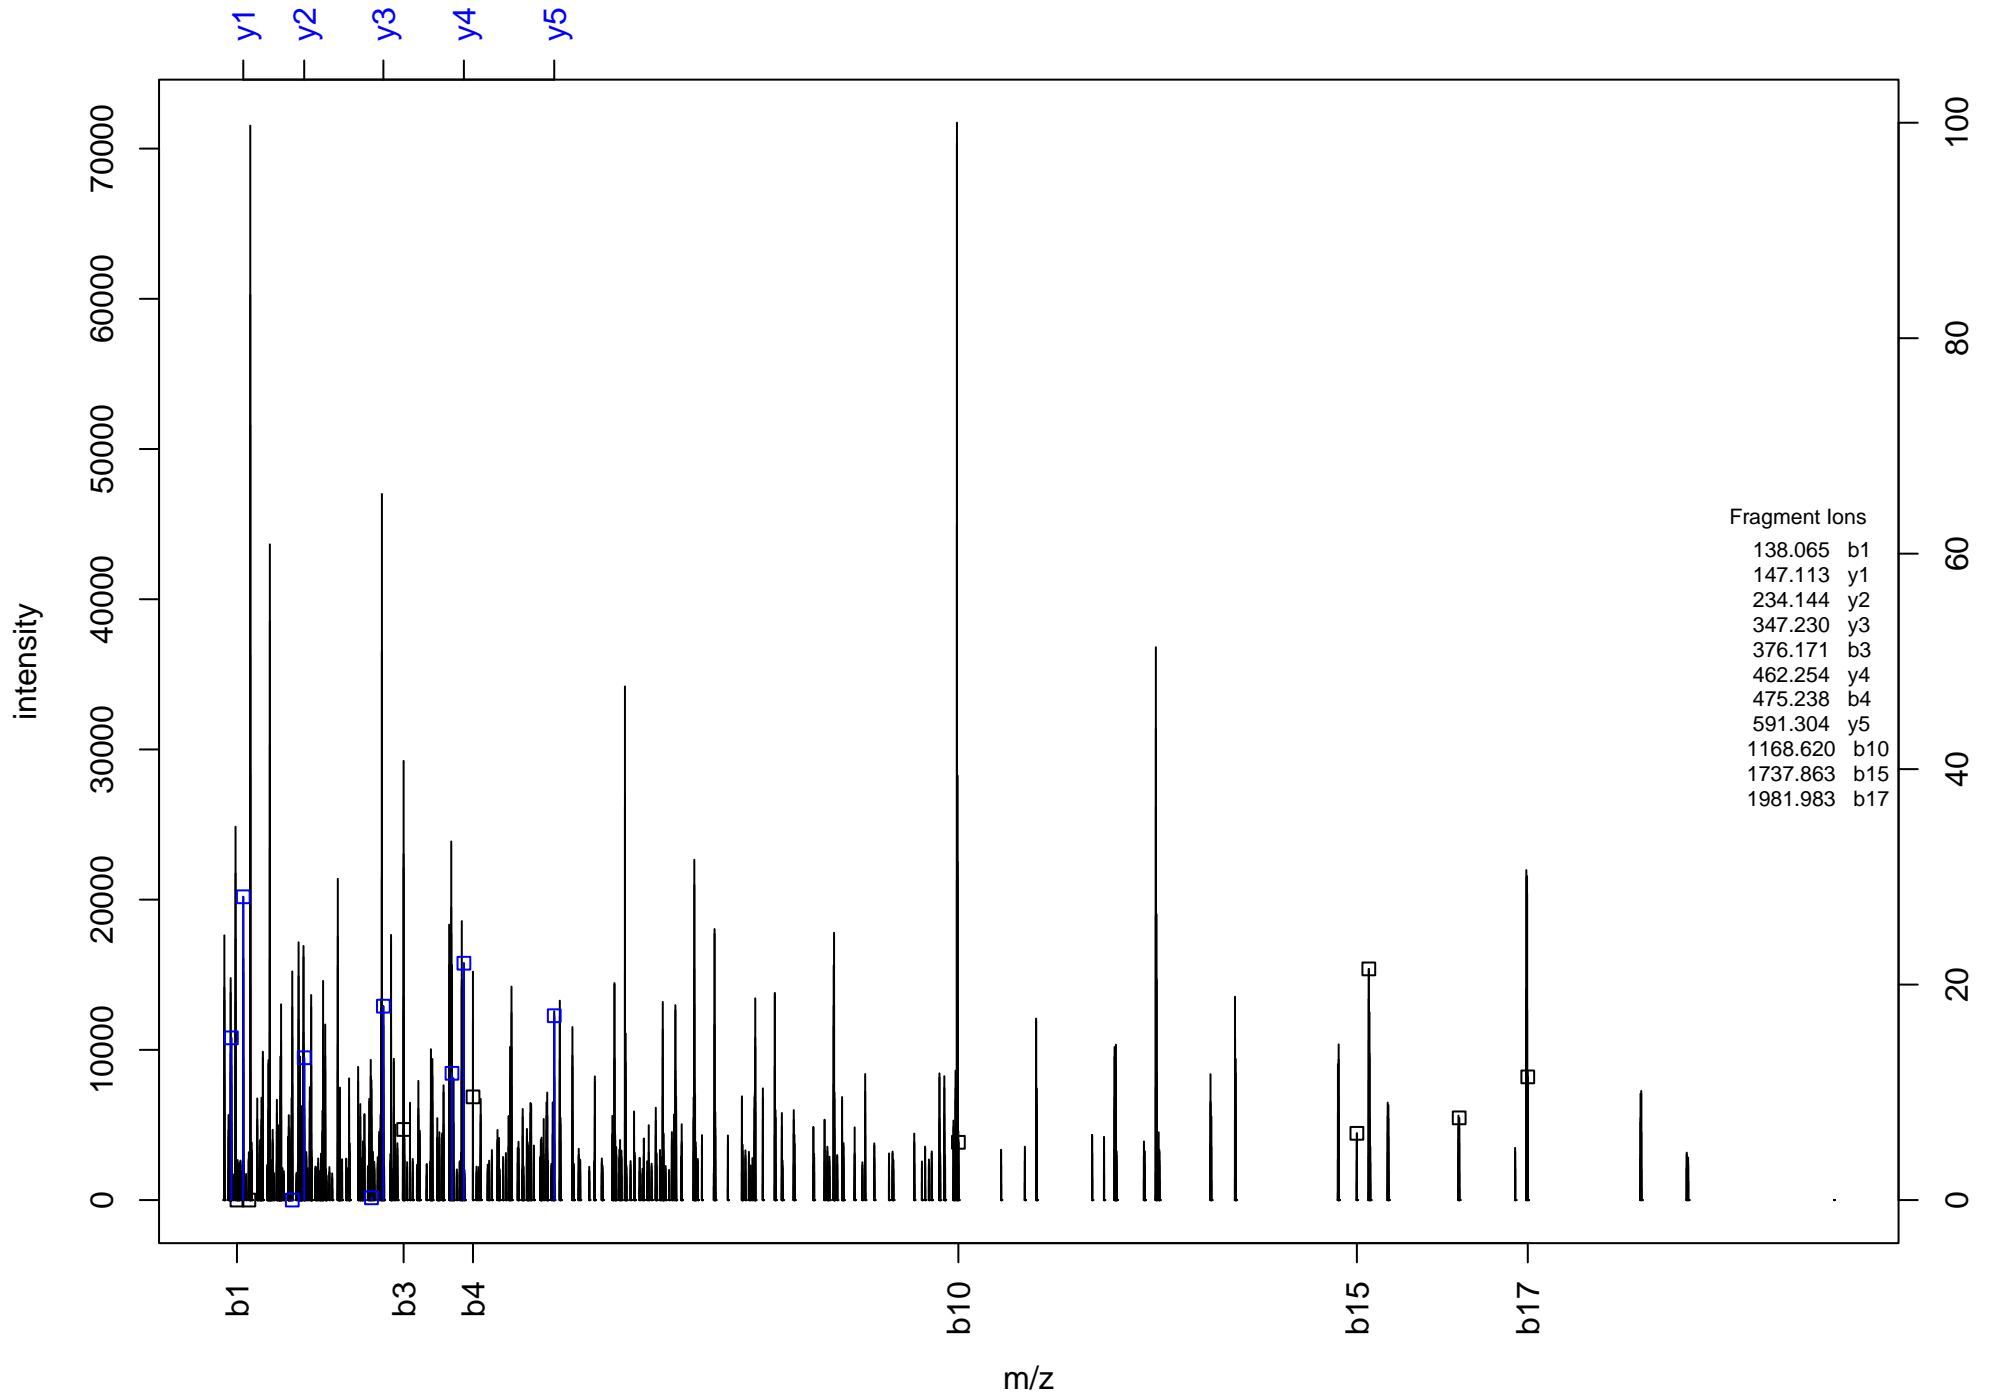

# LVILMEPFEDALR

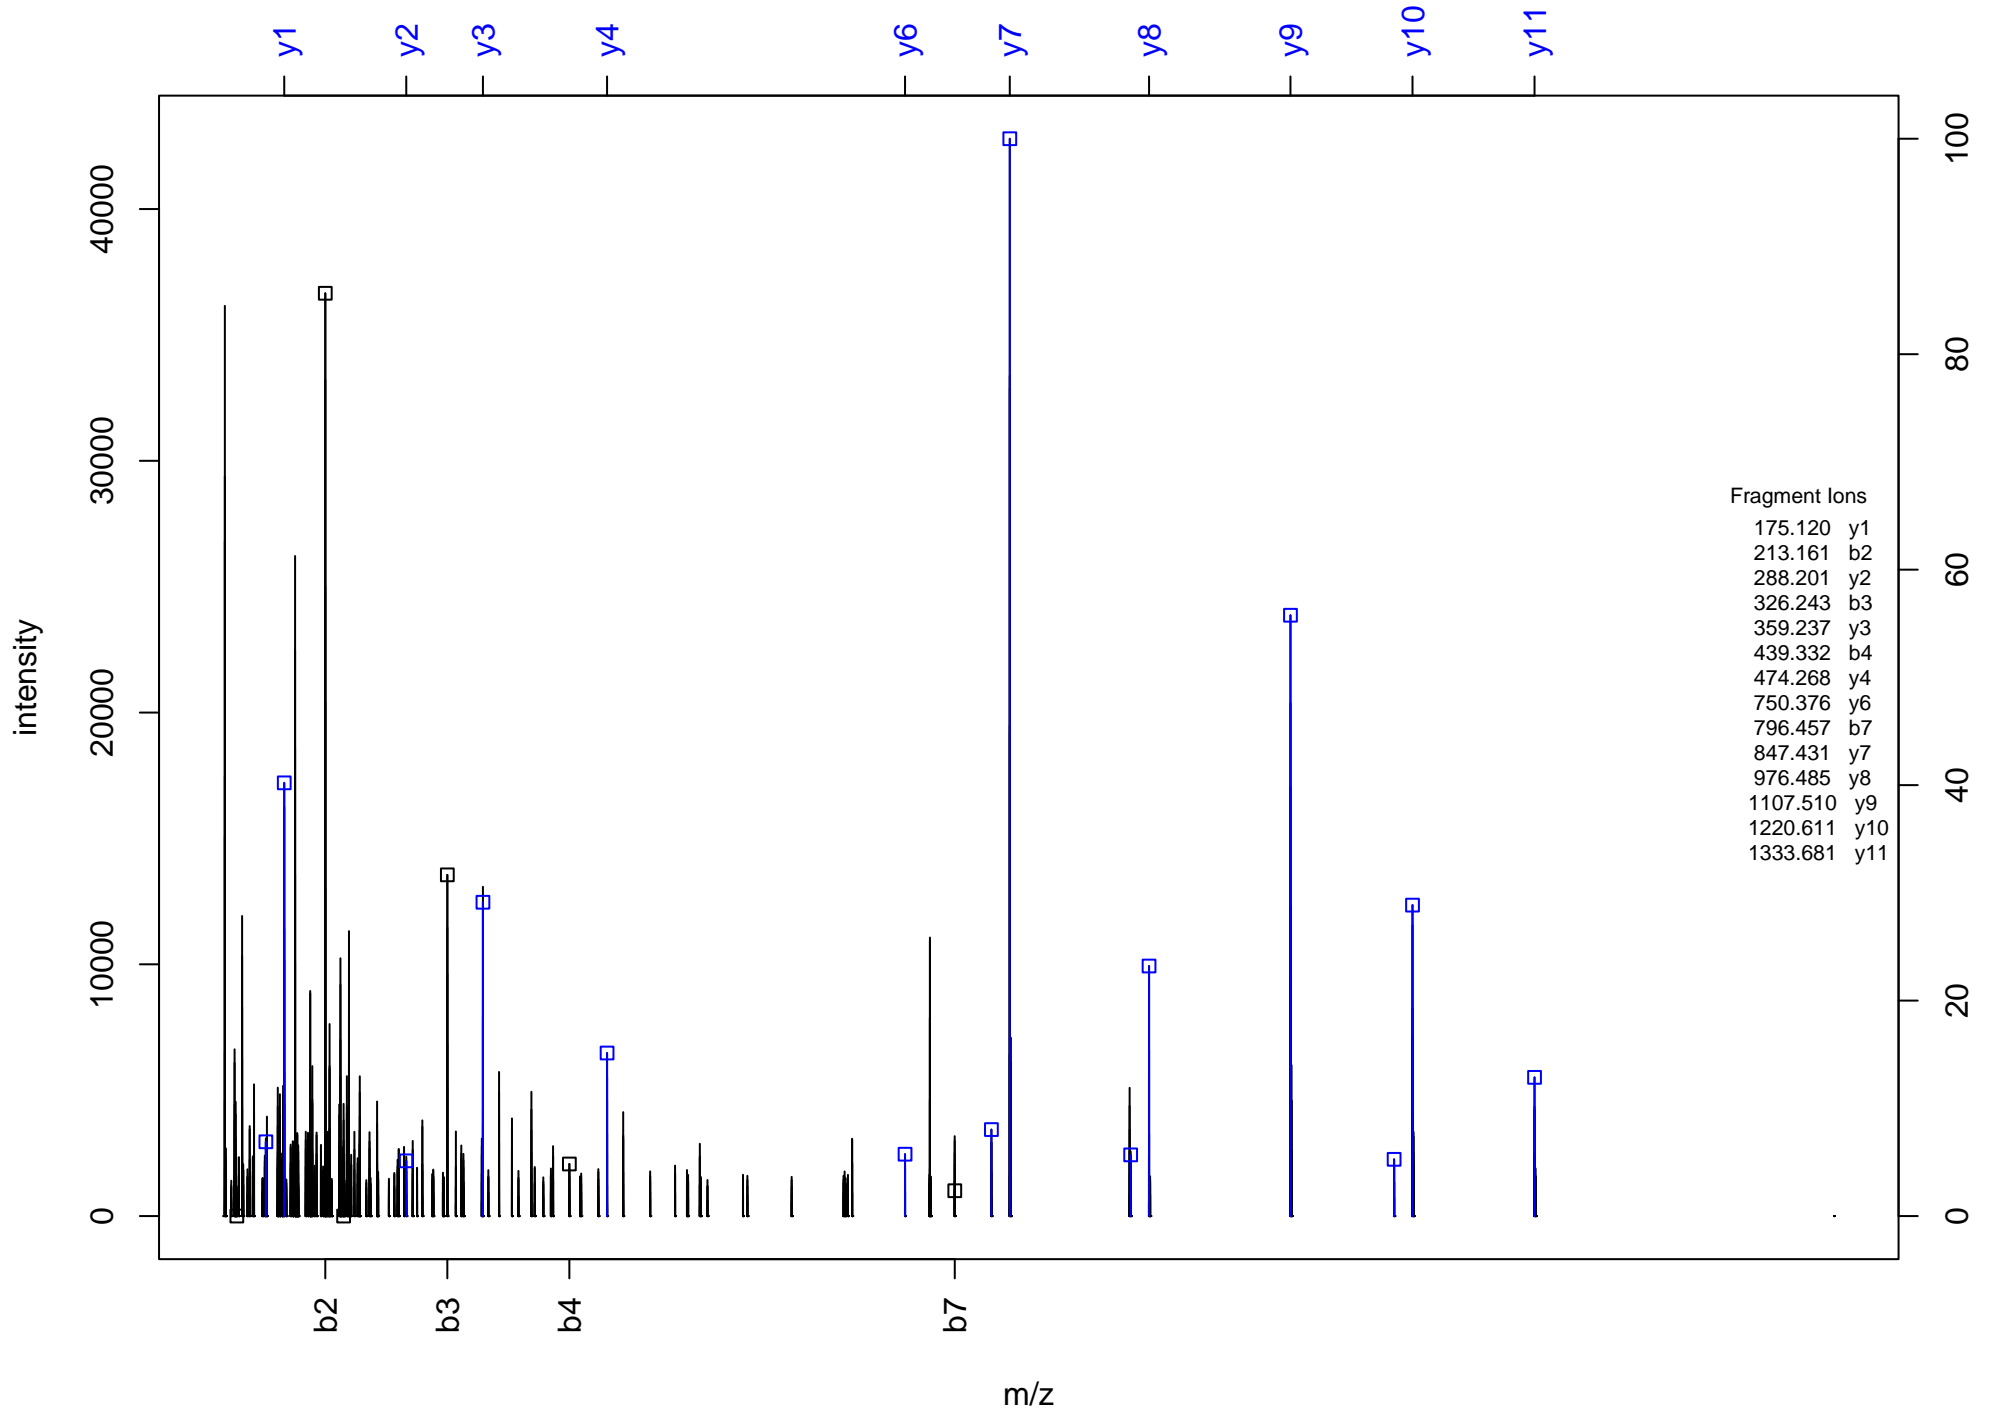

# LDFDLEPEPPPAPPR

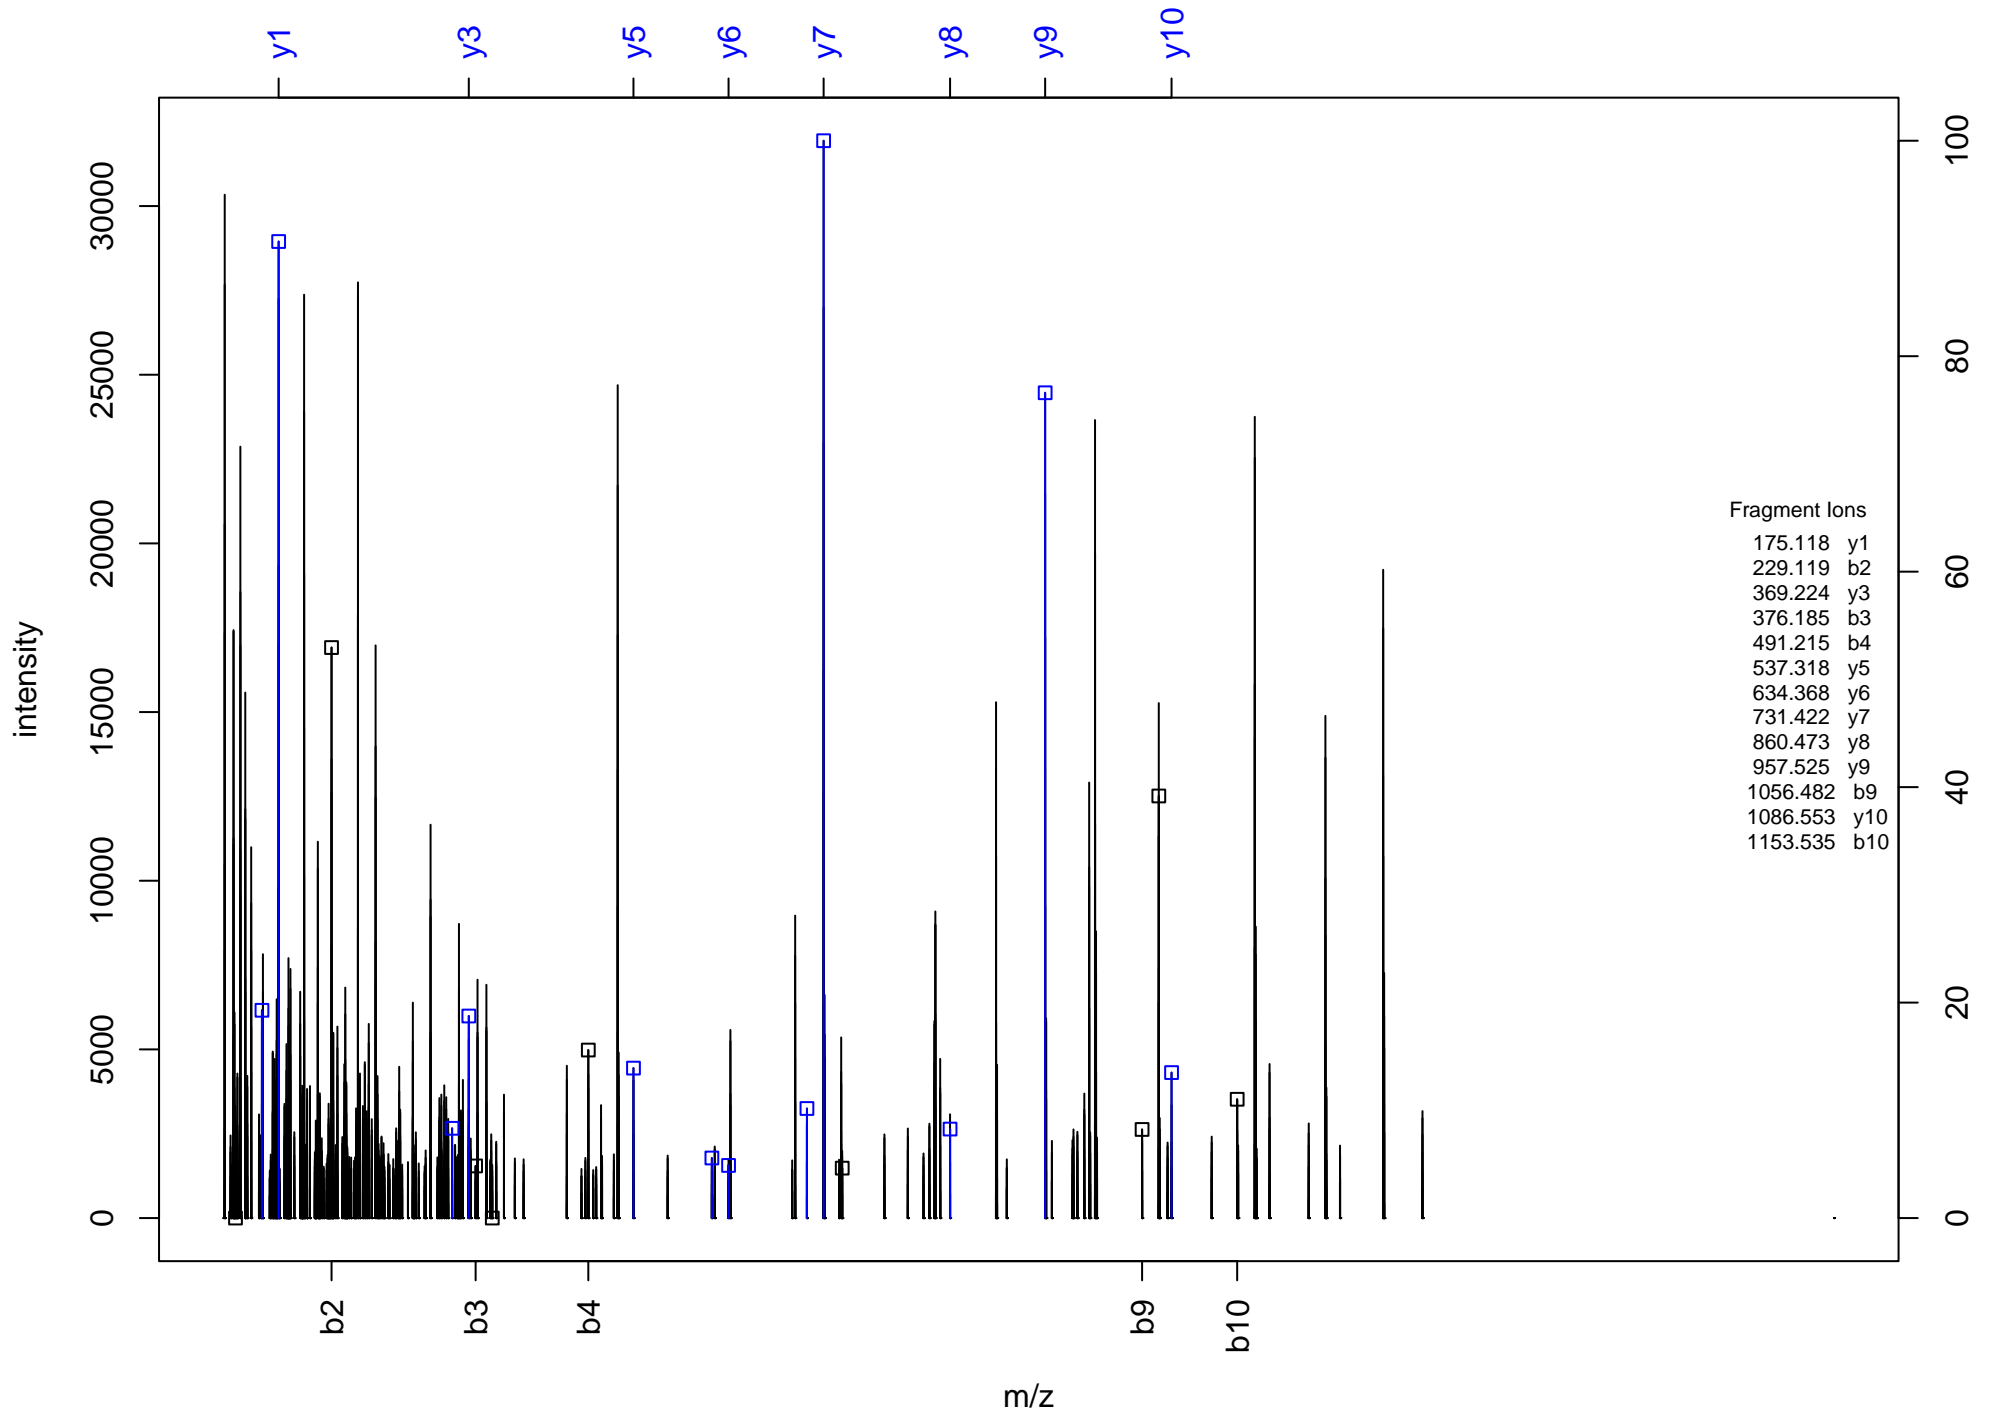

# ILLSSLLR

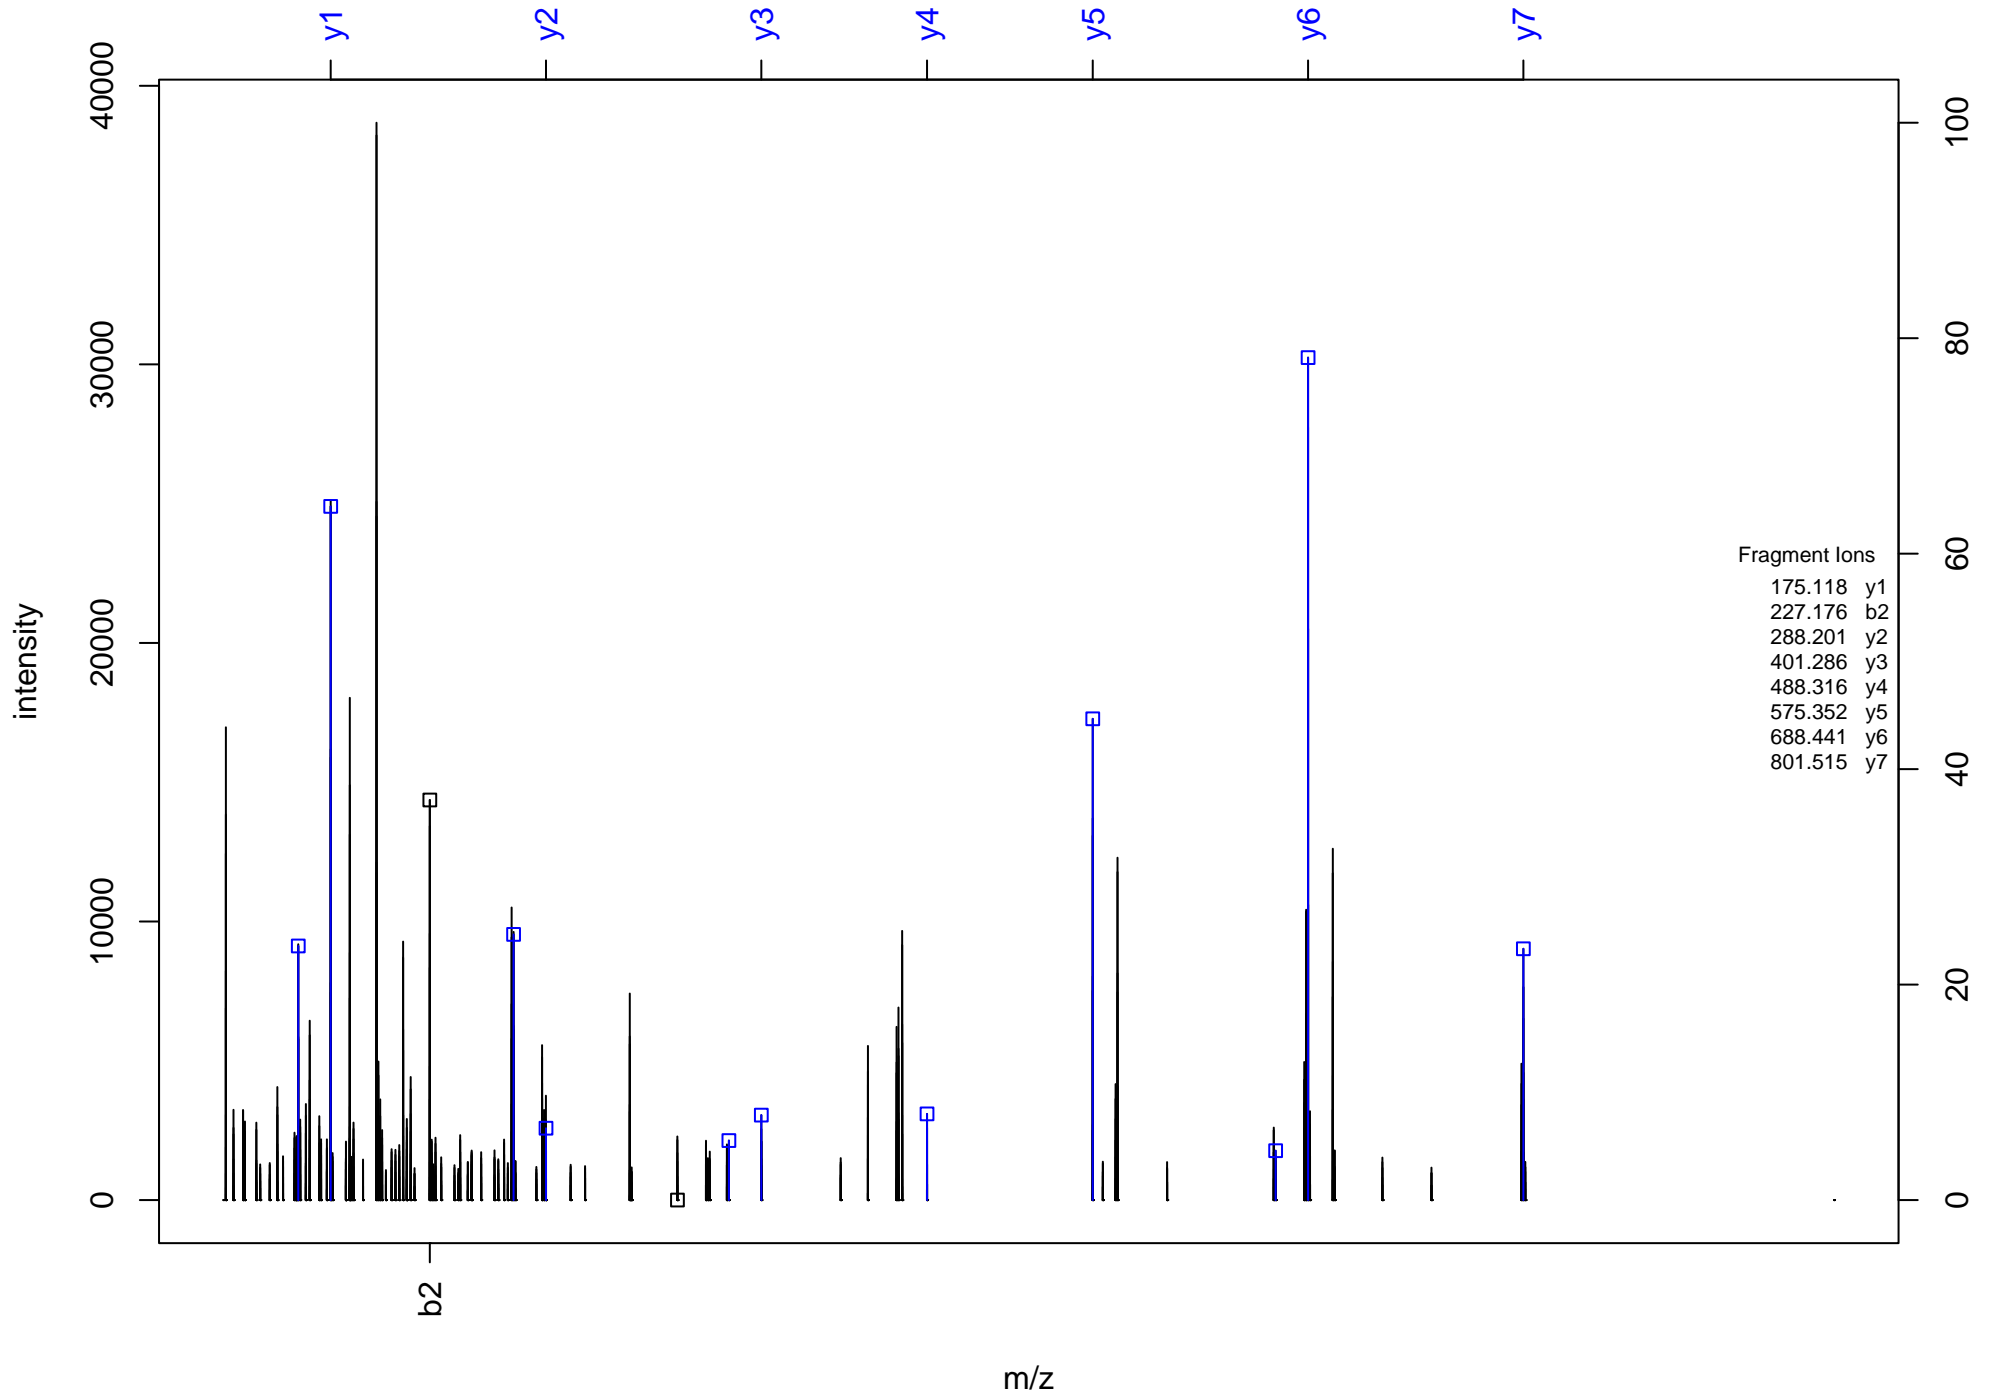

# LIAEGPGETVLVAEEEEAR

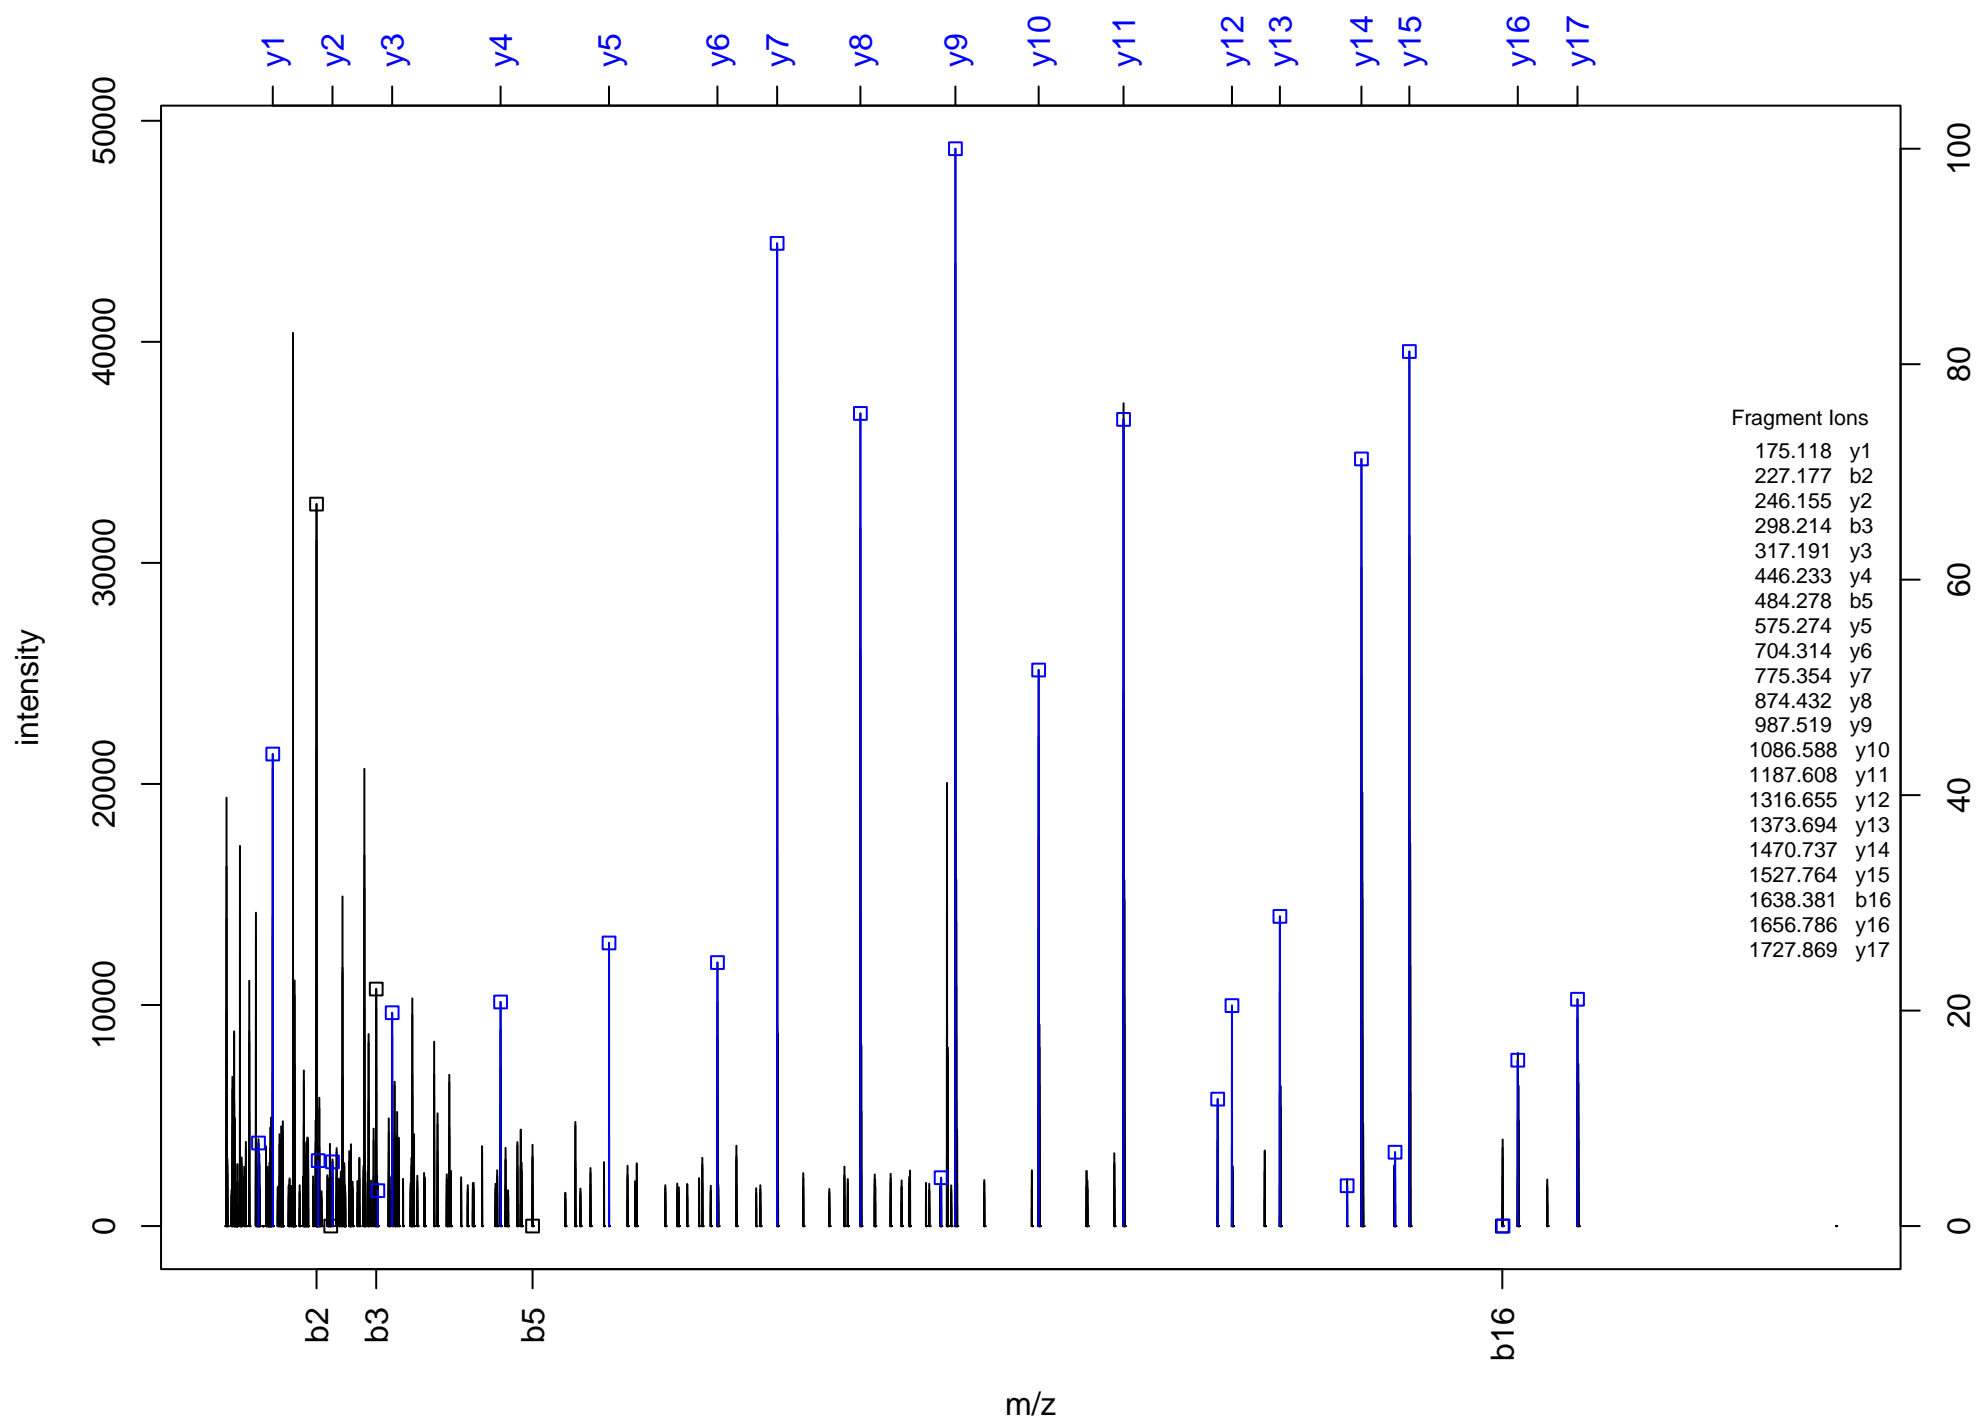

# VQ^EILEN^VQ^VRK

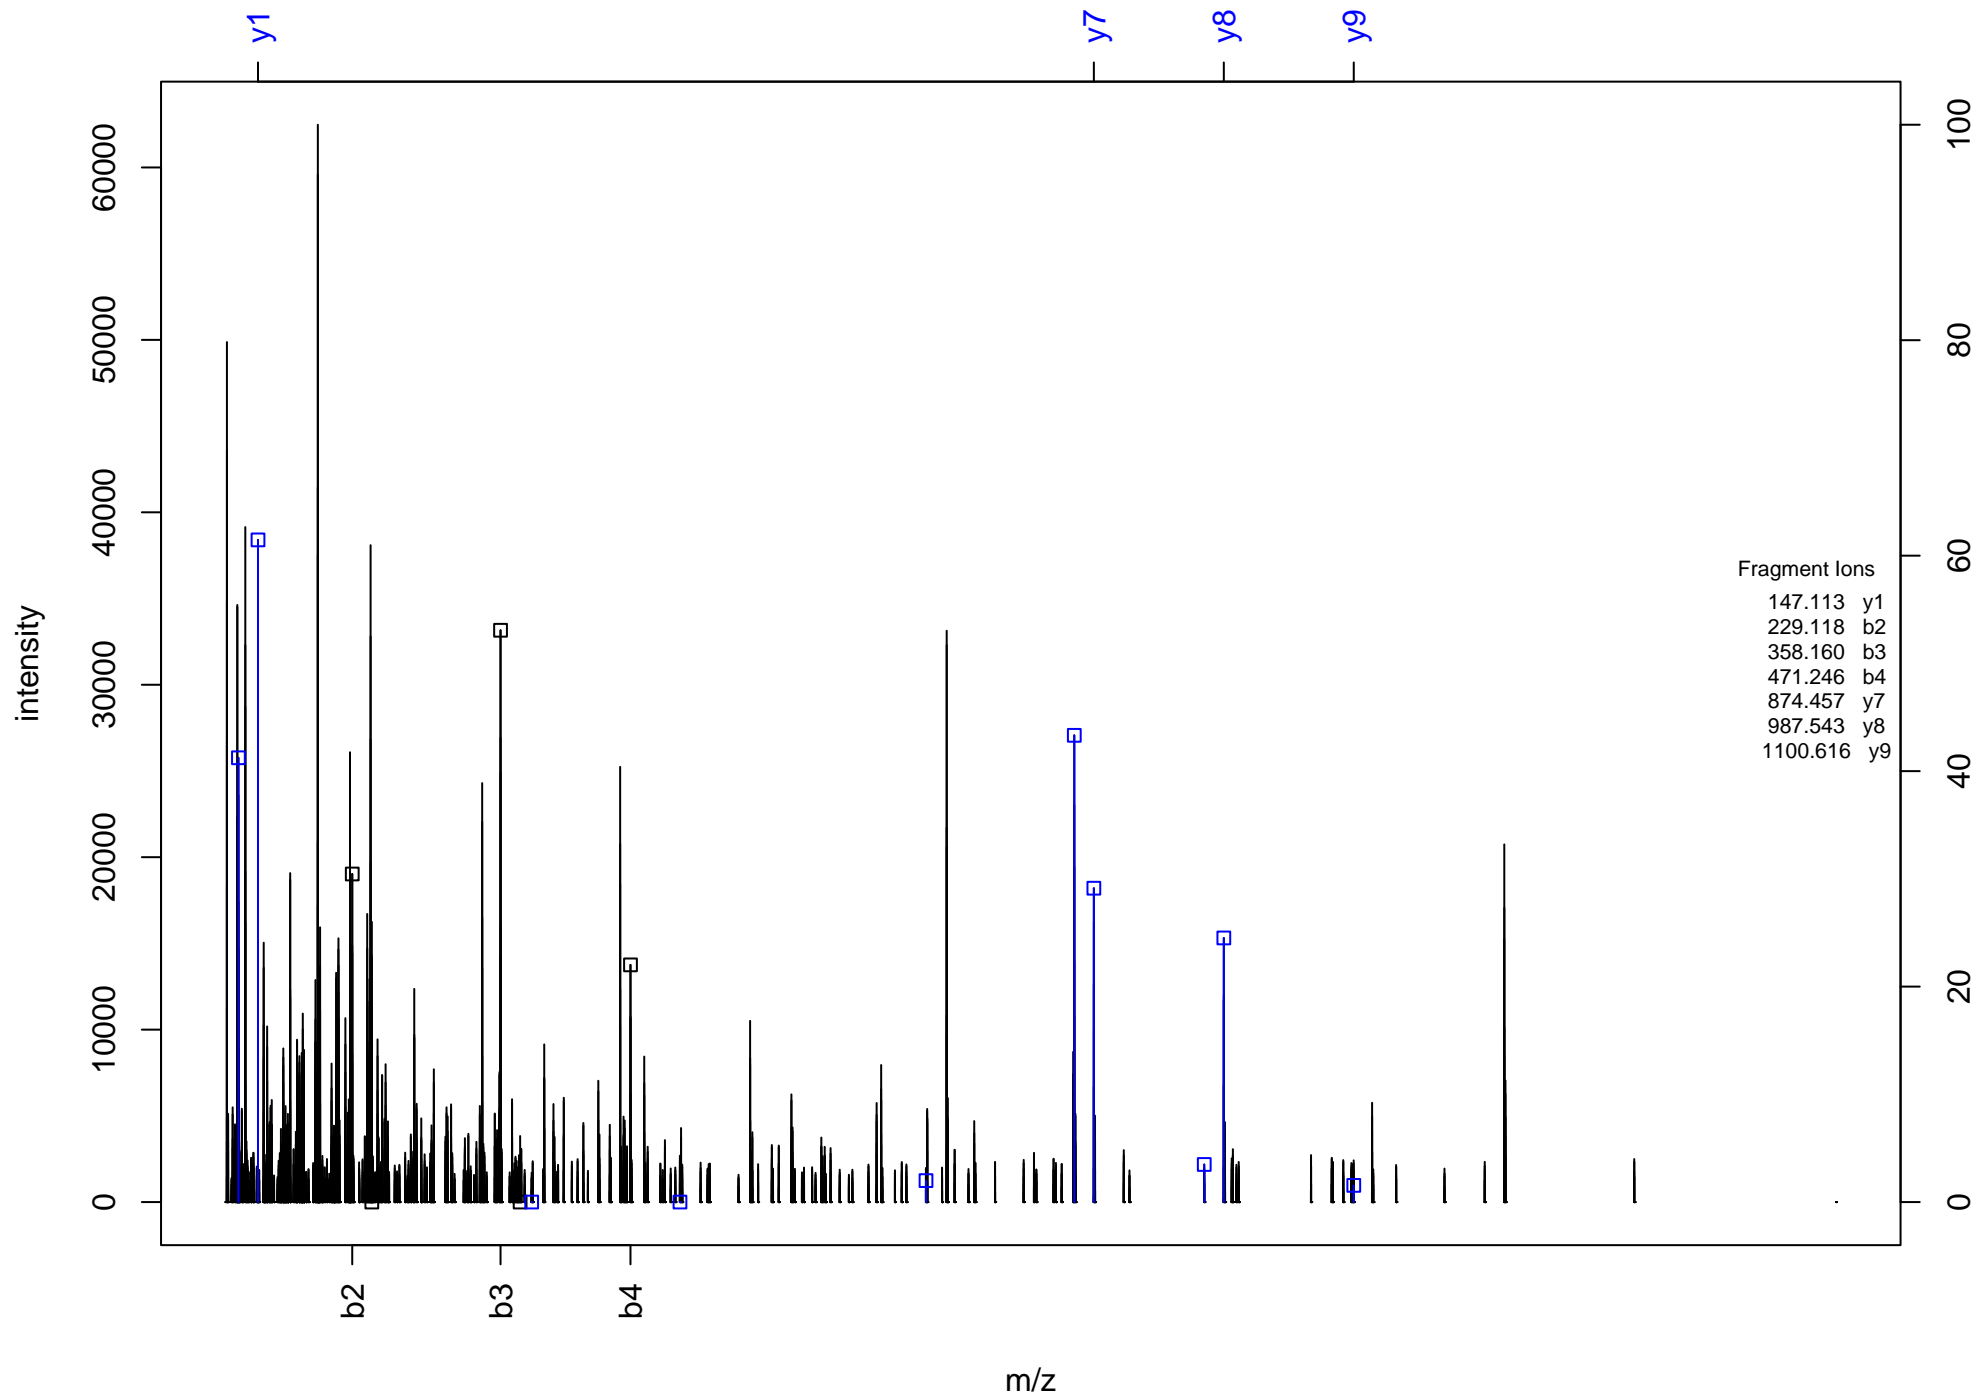



# LDPDSIPSPIQVIENDR

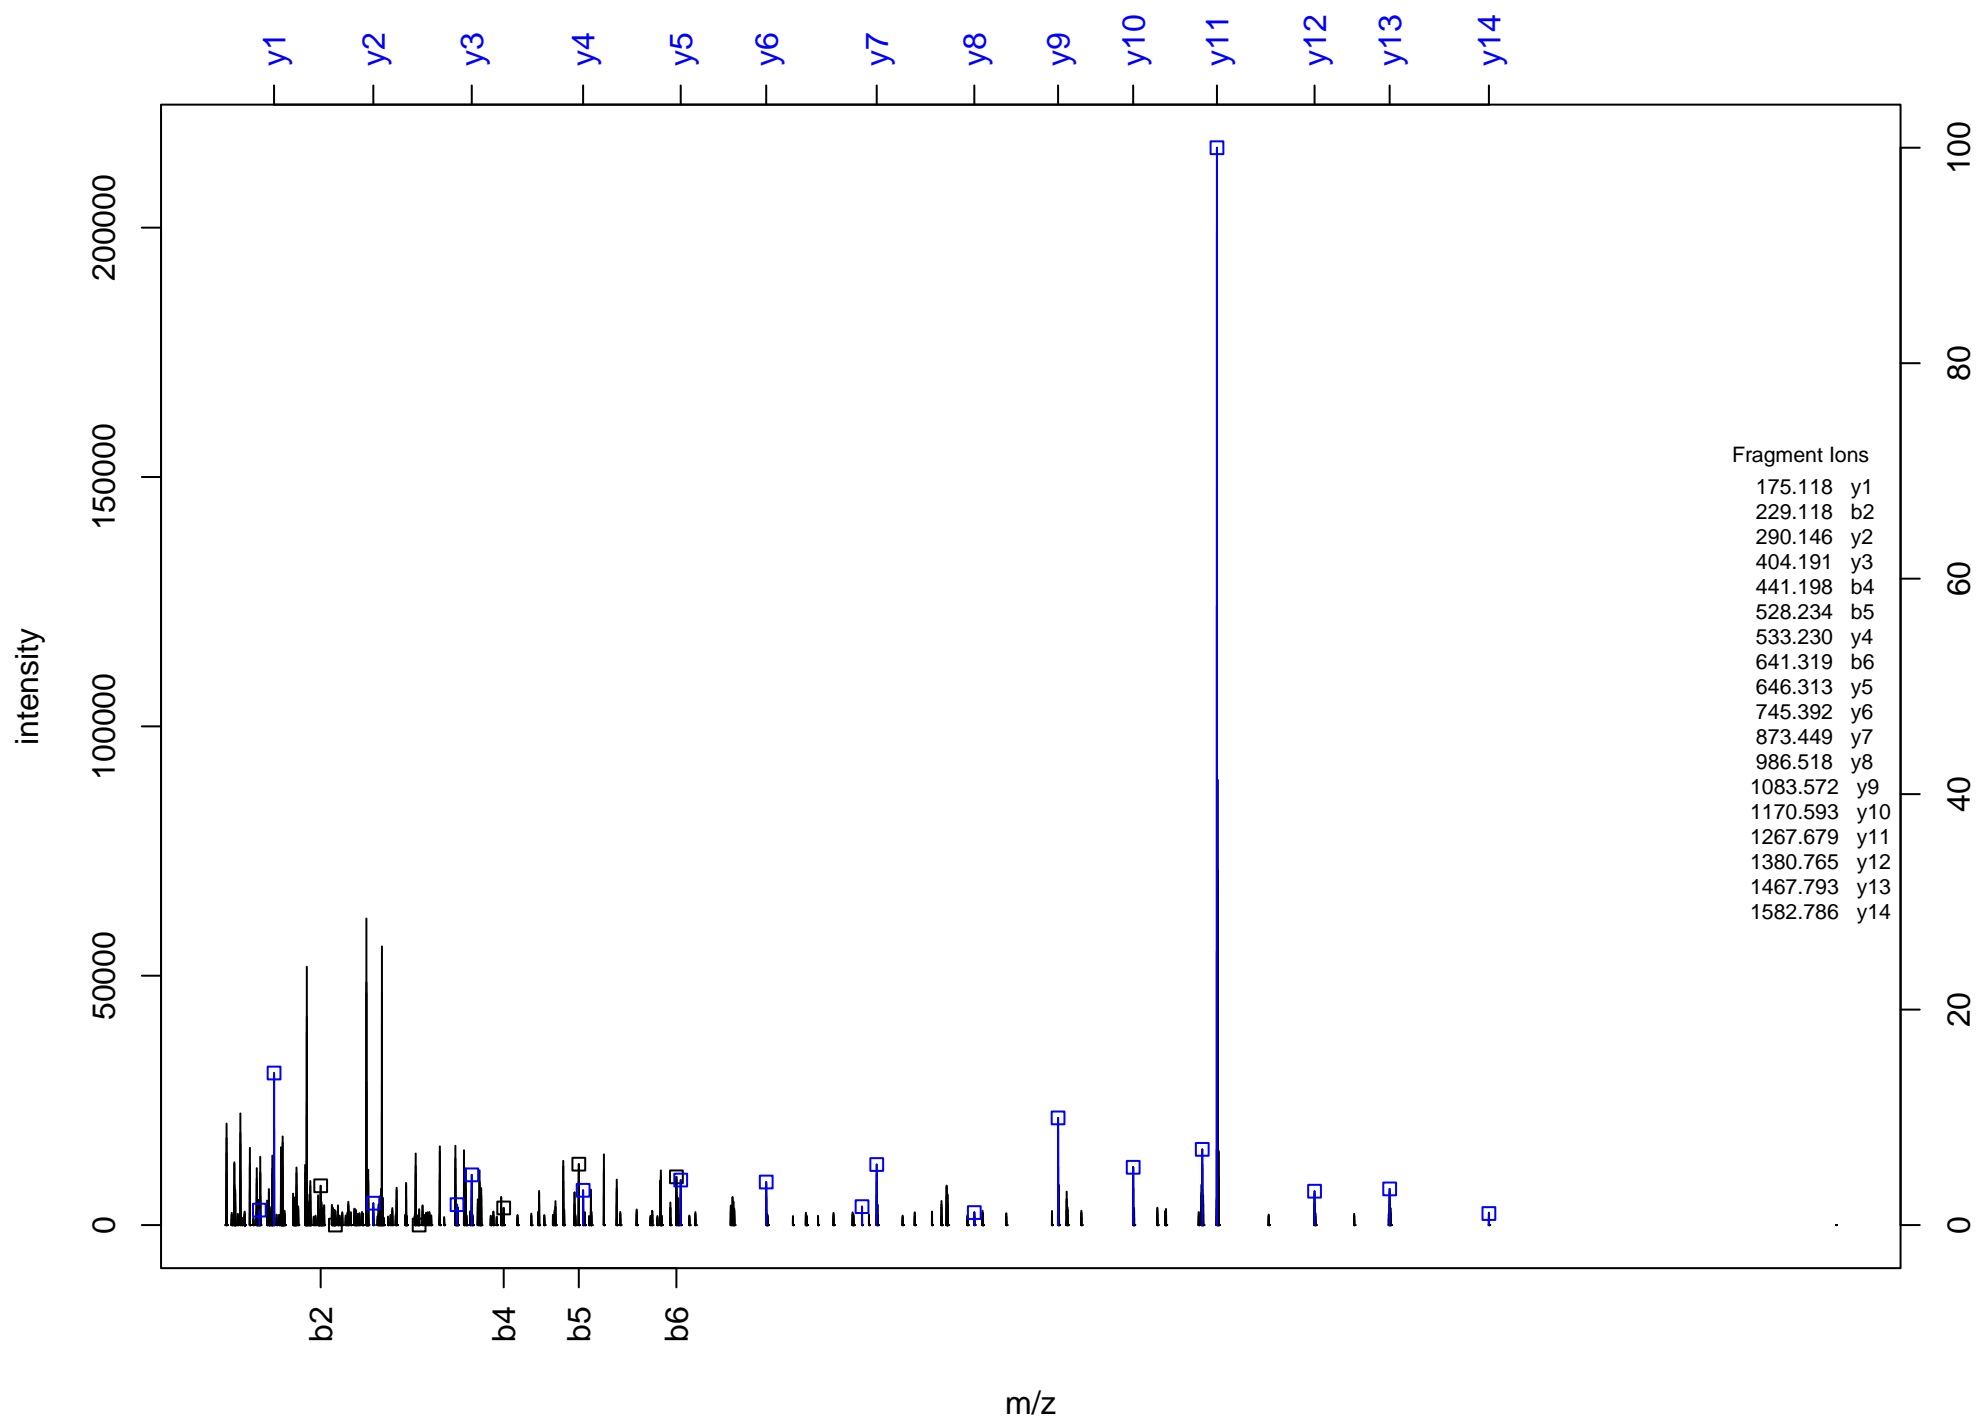

# LGGLDVLEAEFSK

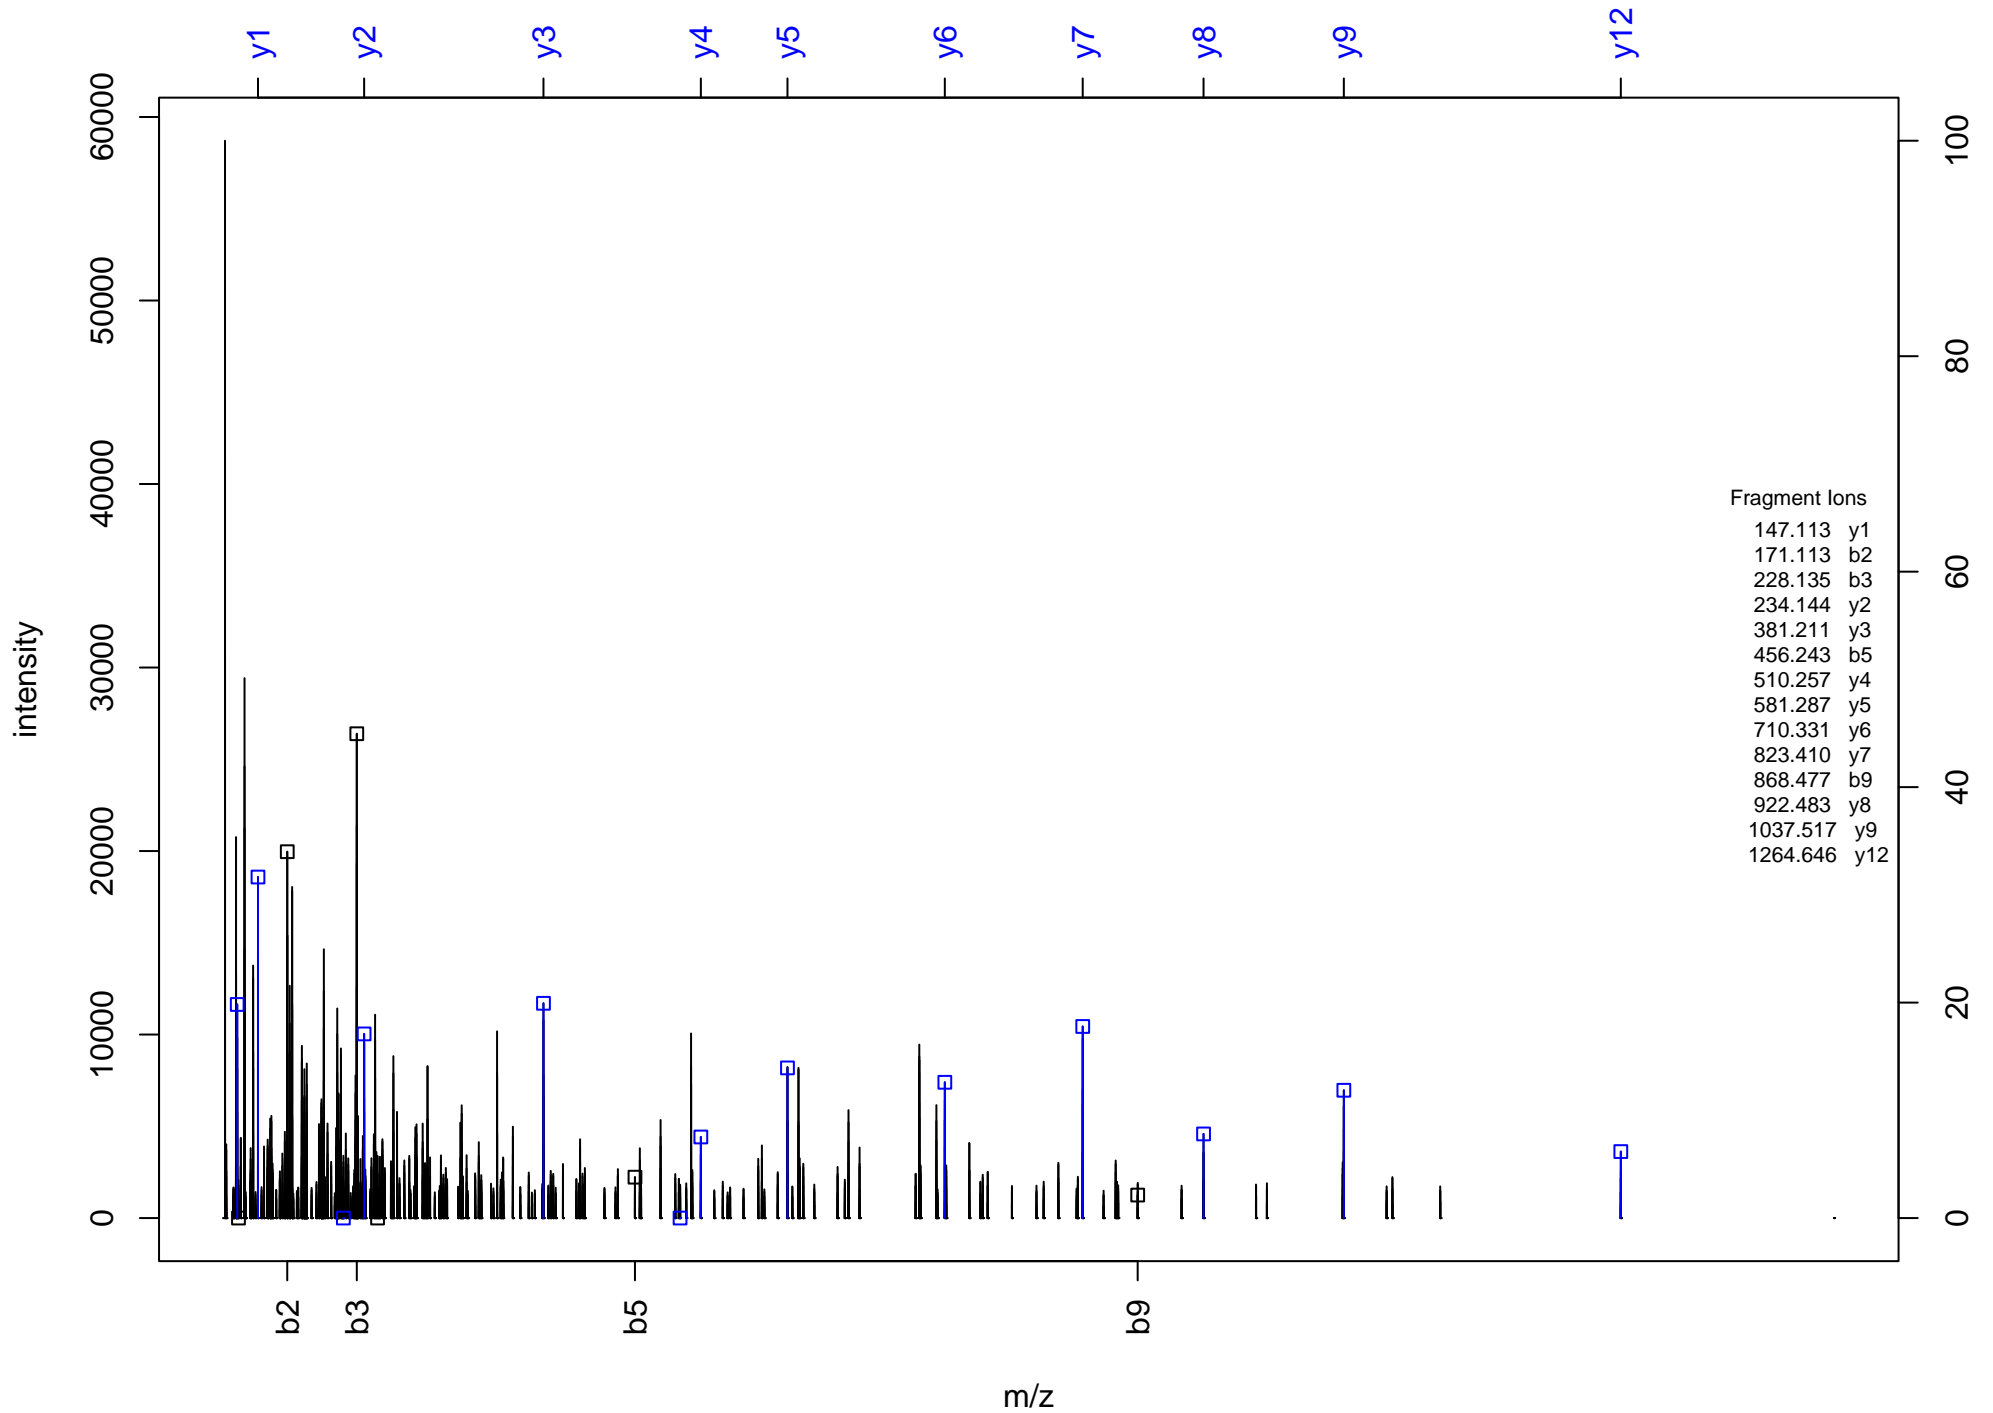

# ALGEPITLFGEGPAER

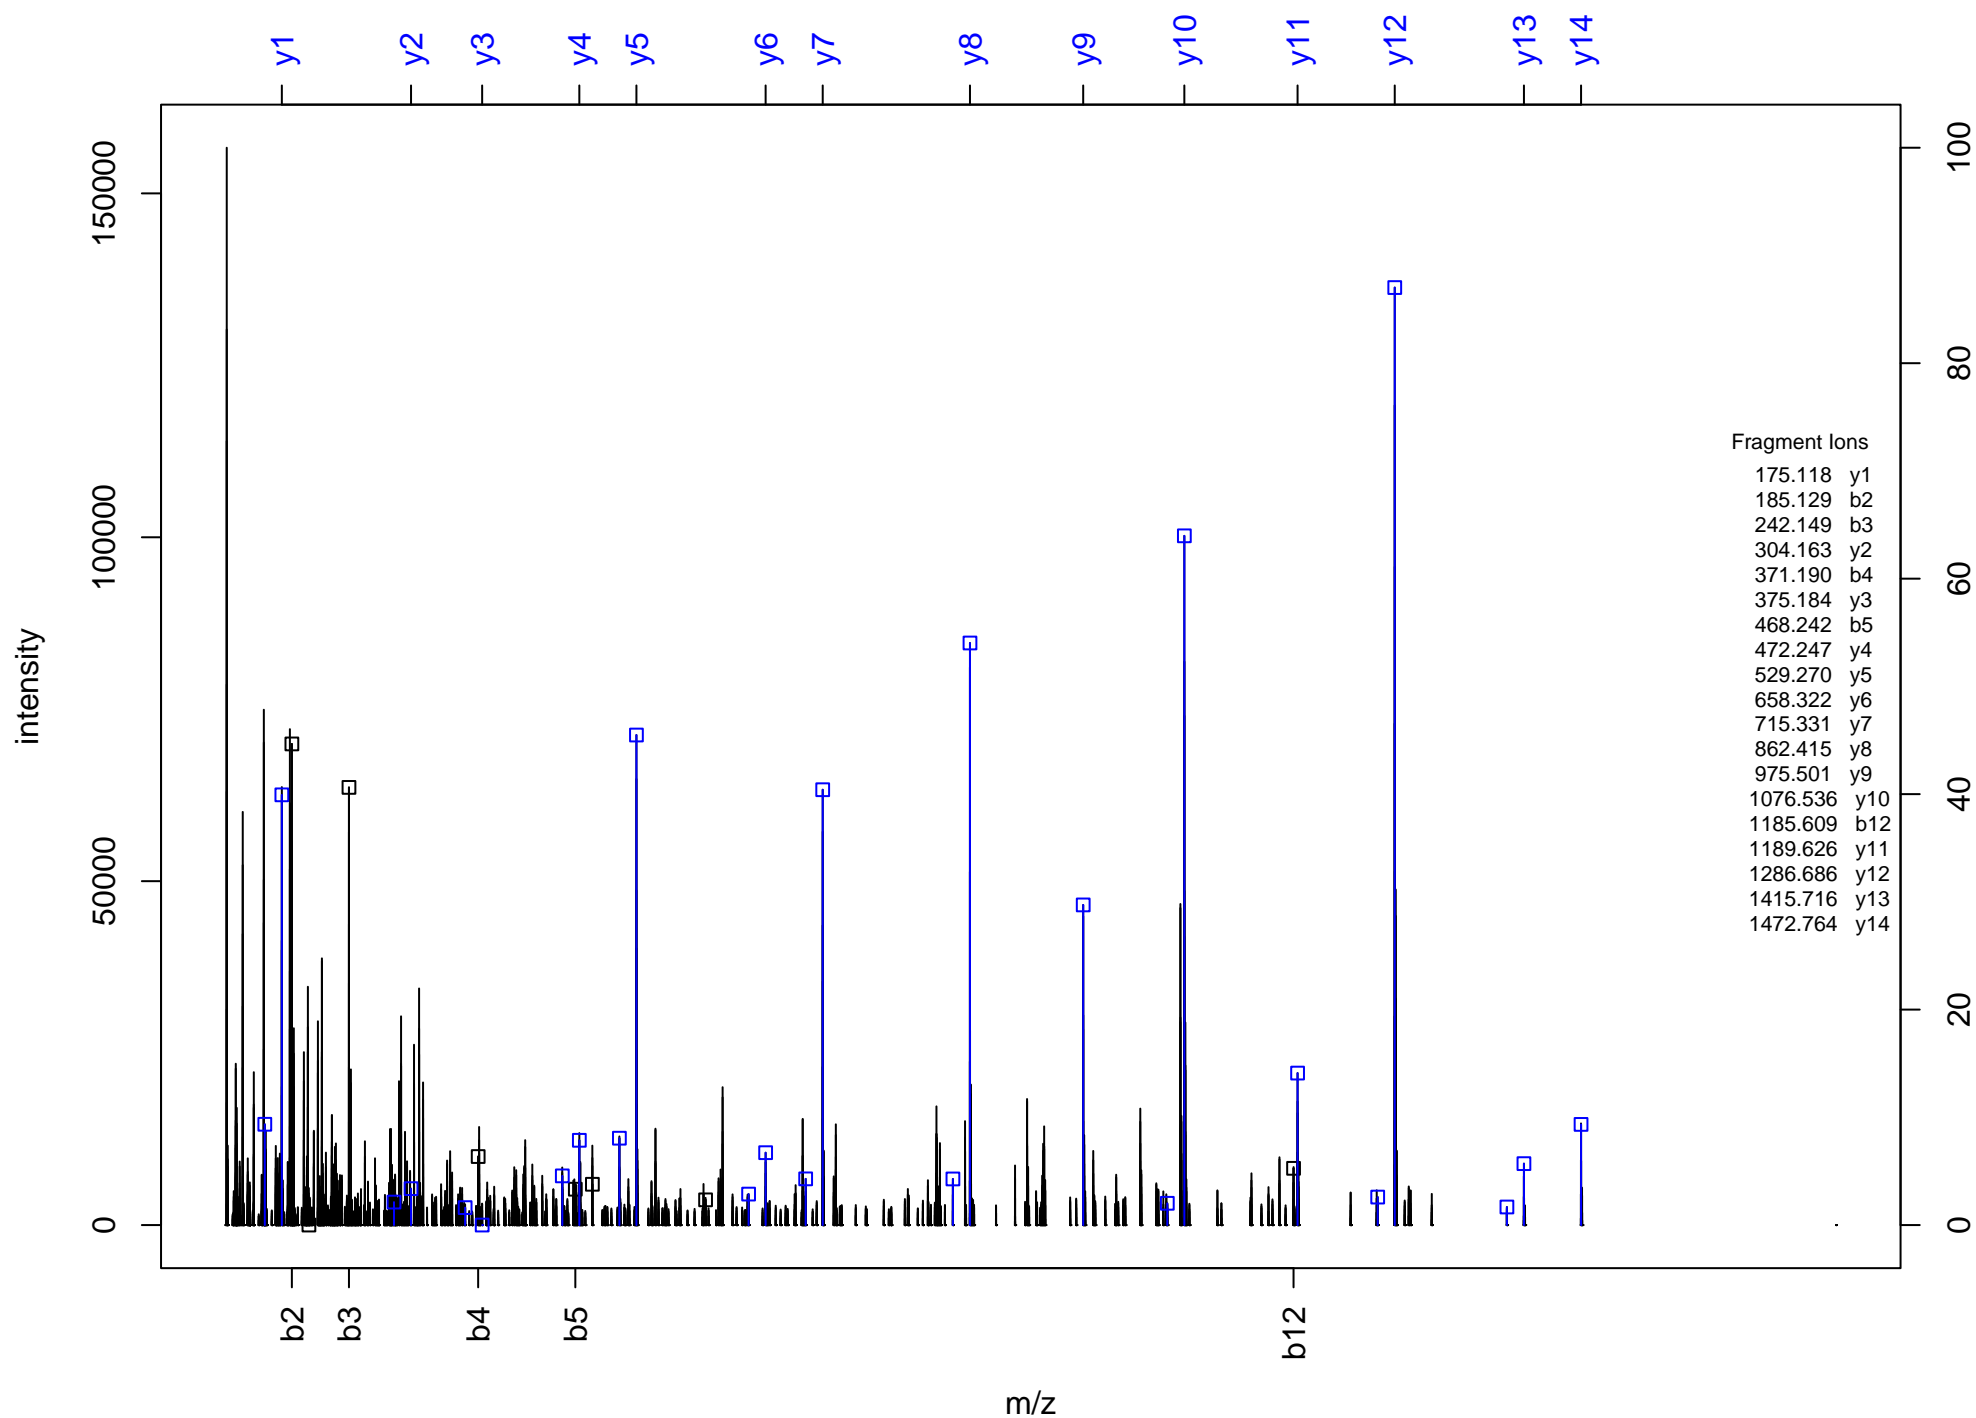

# GVN^GKNM\*Q^N^RK

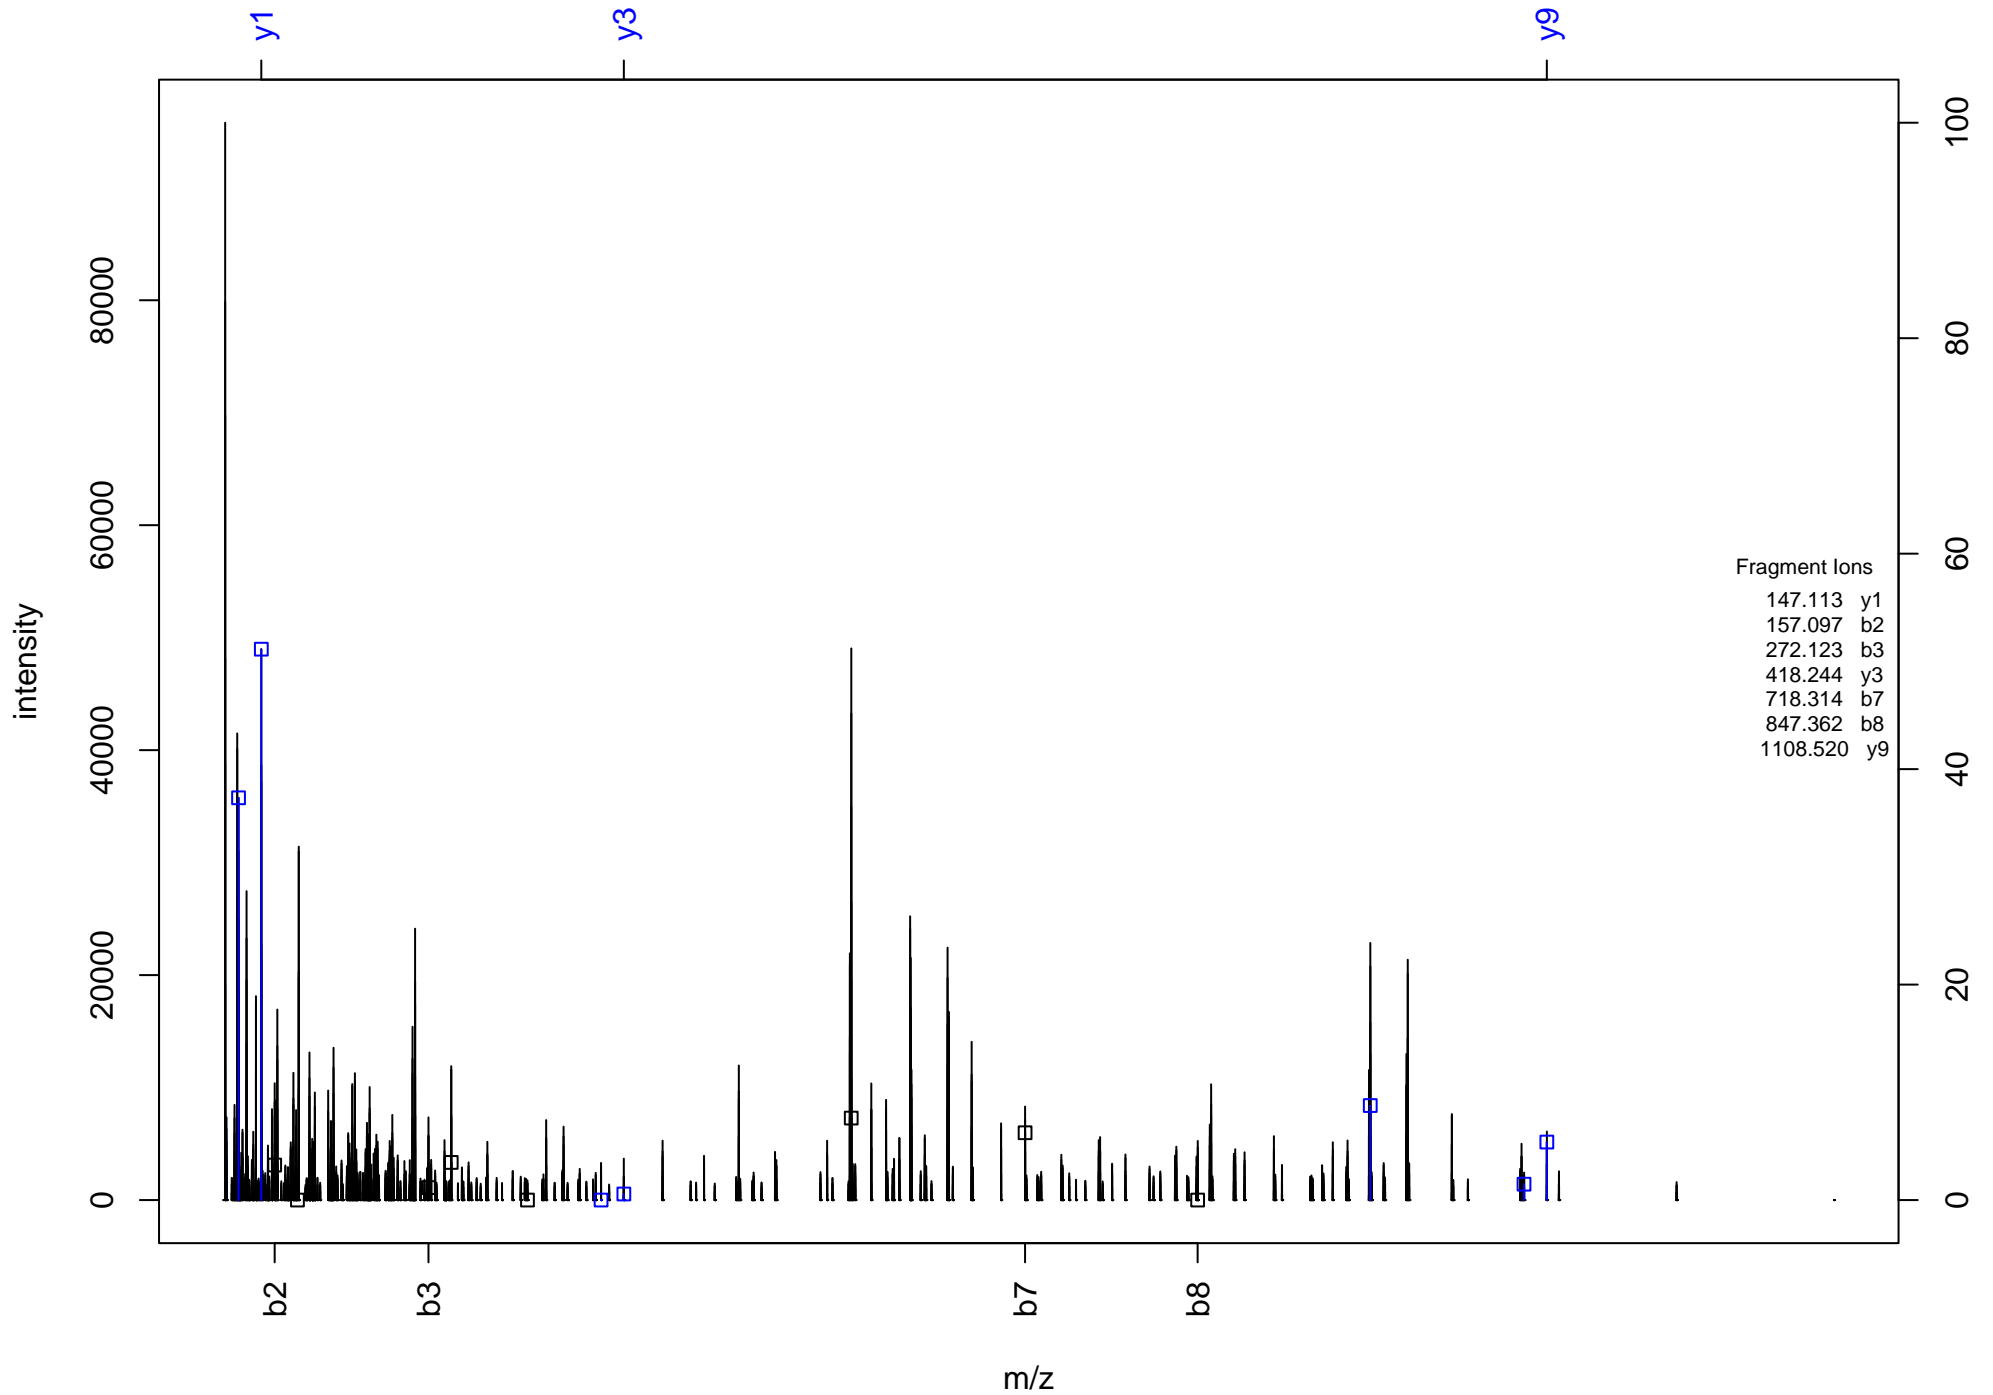

# GVTAEM\*Q^NLVHRR

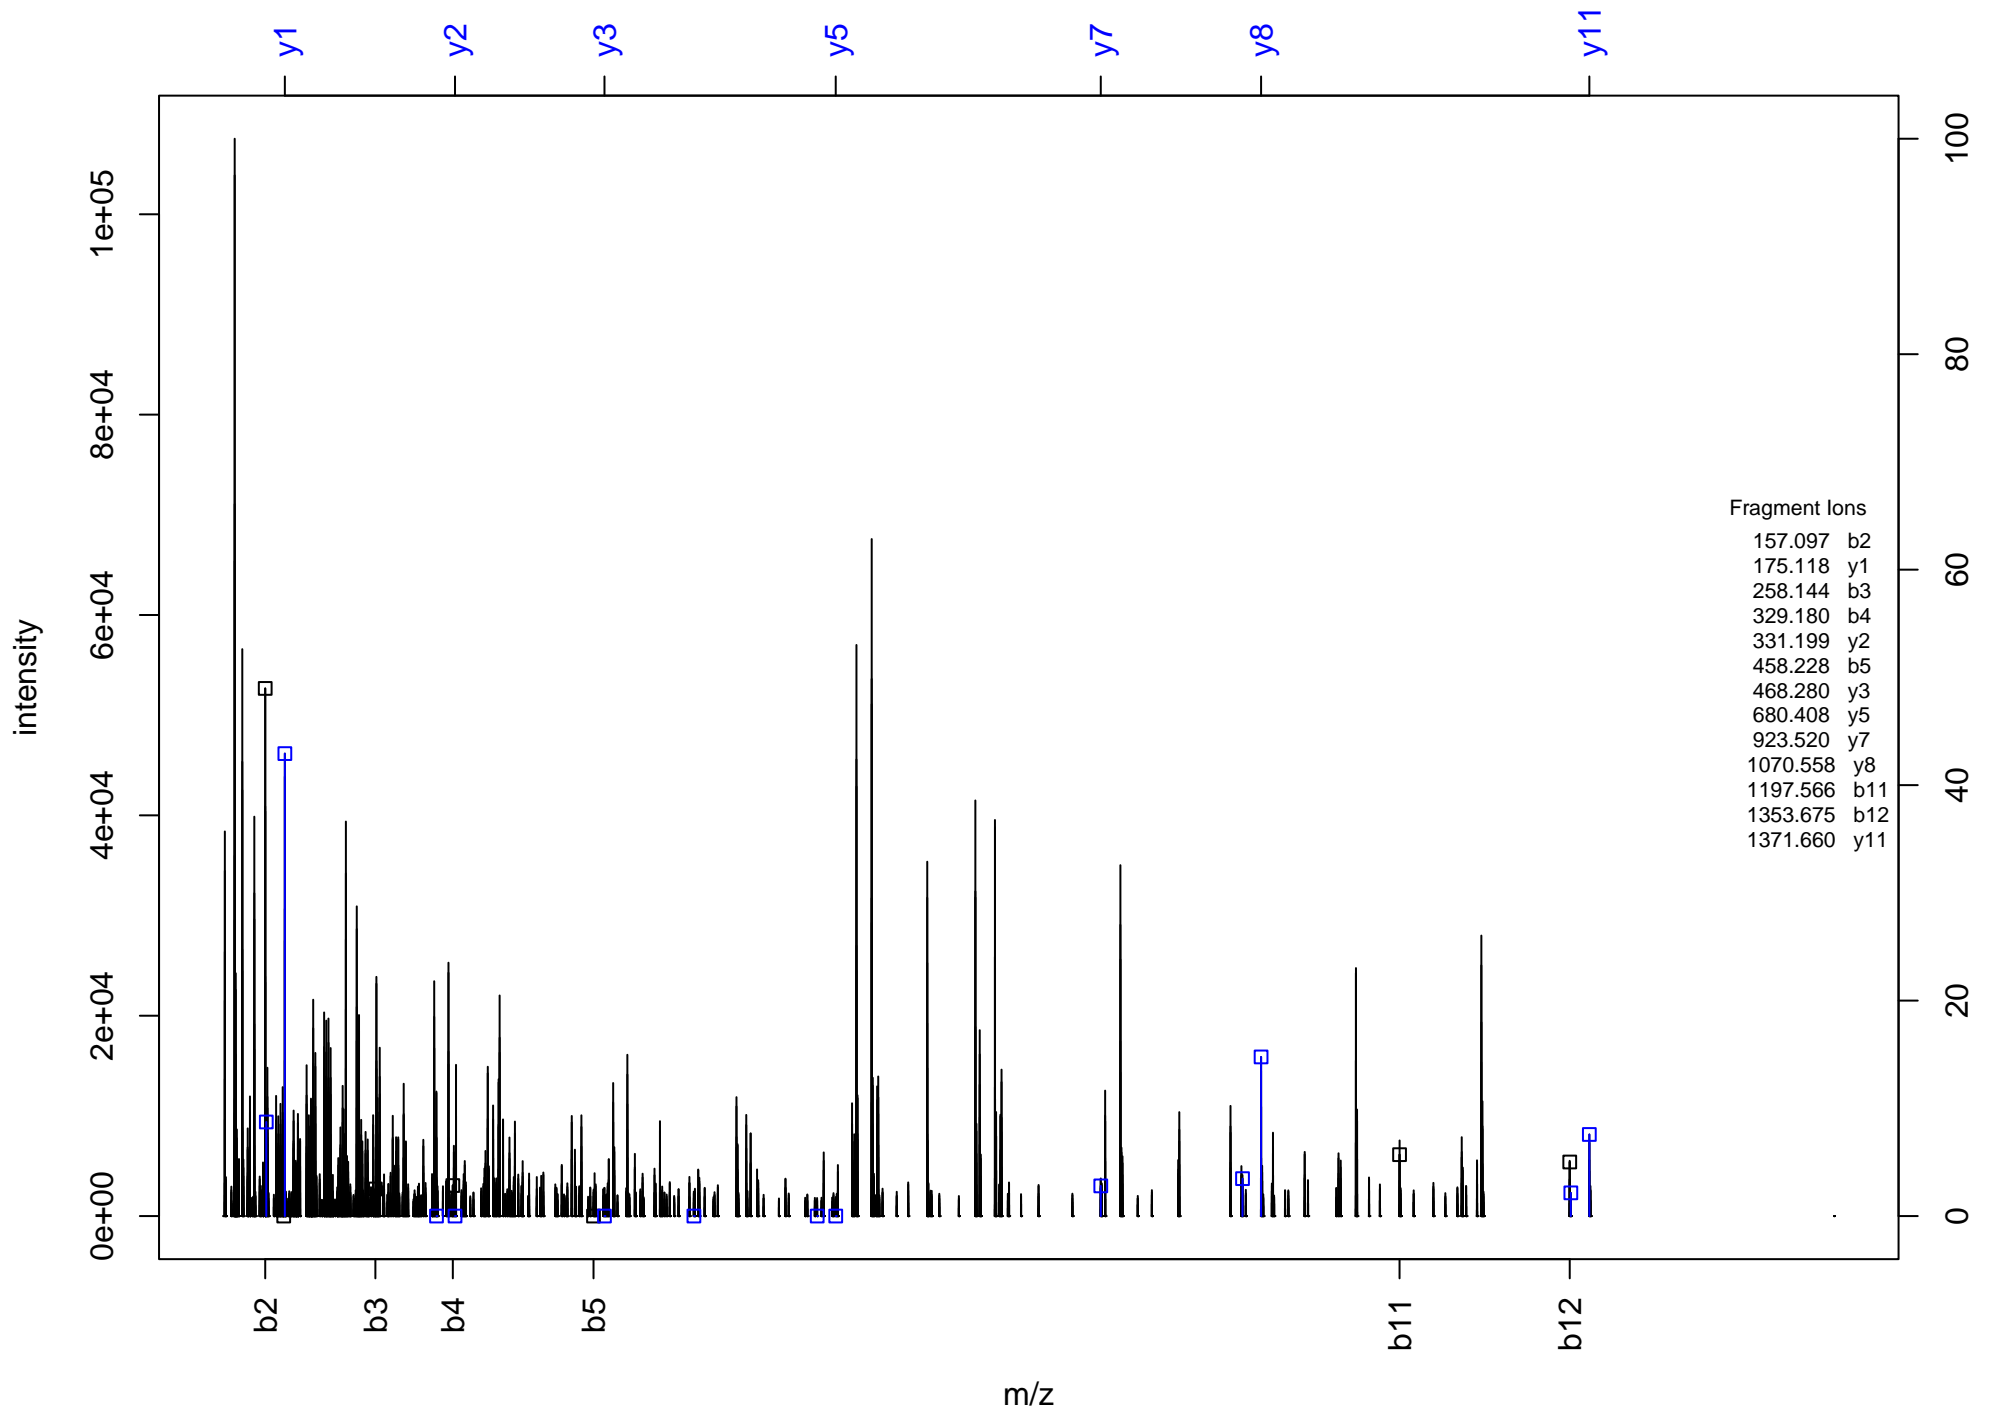

# AALIYTCTVCR

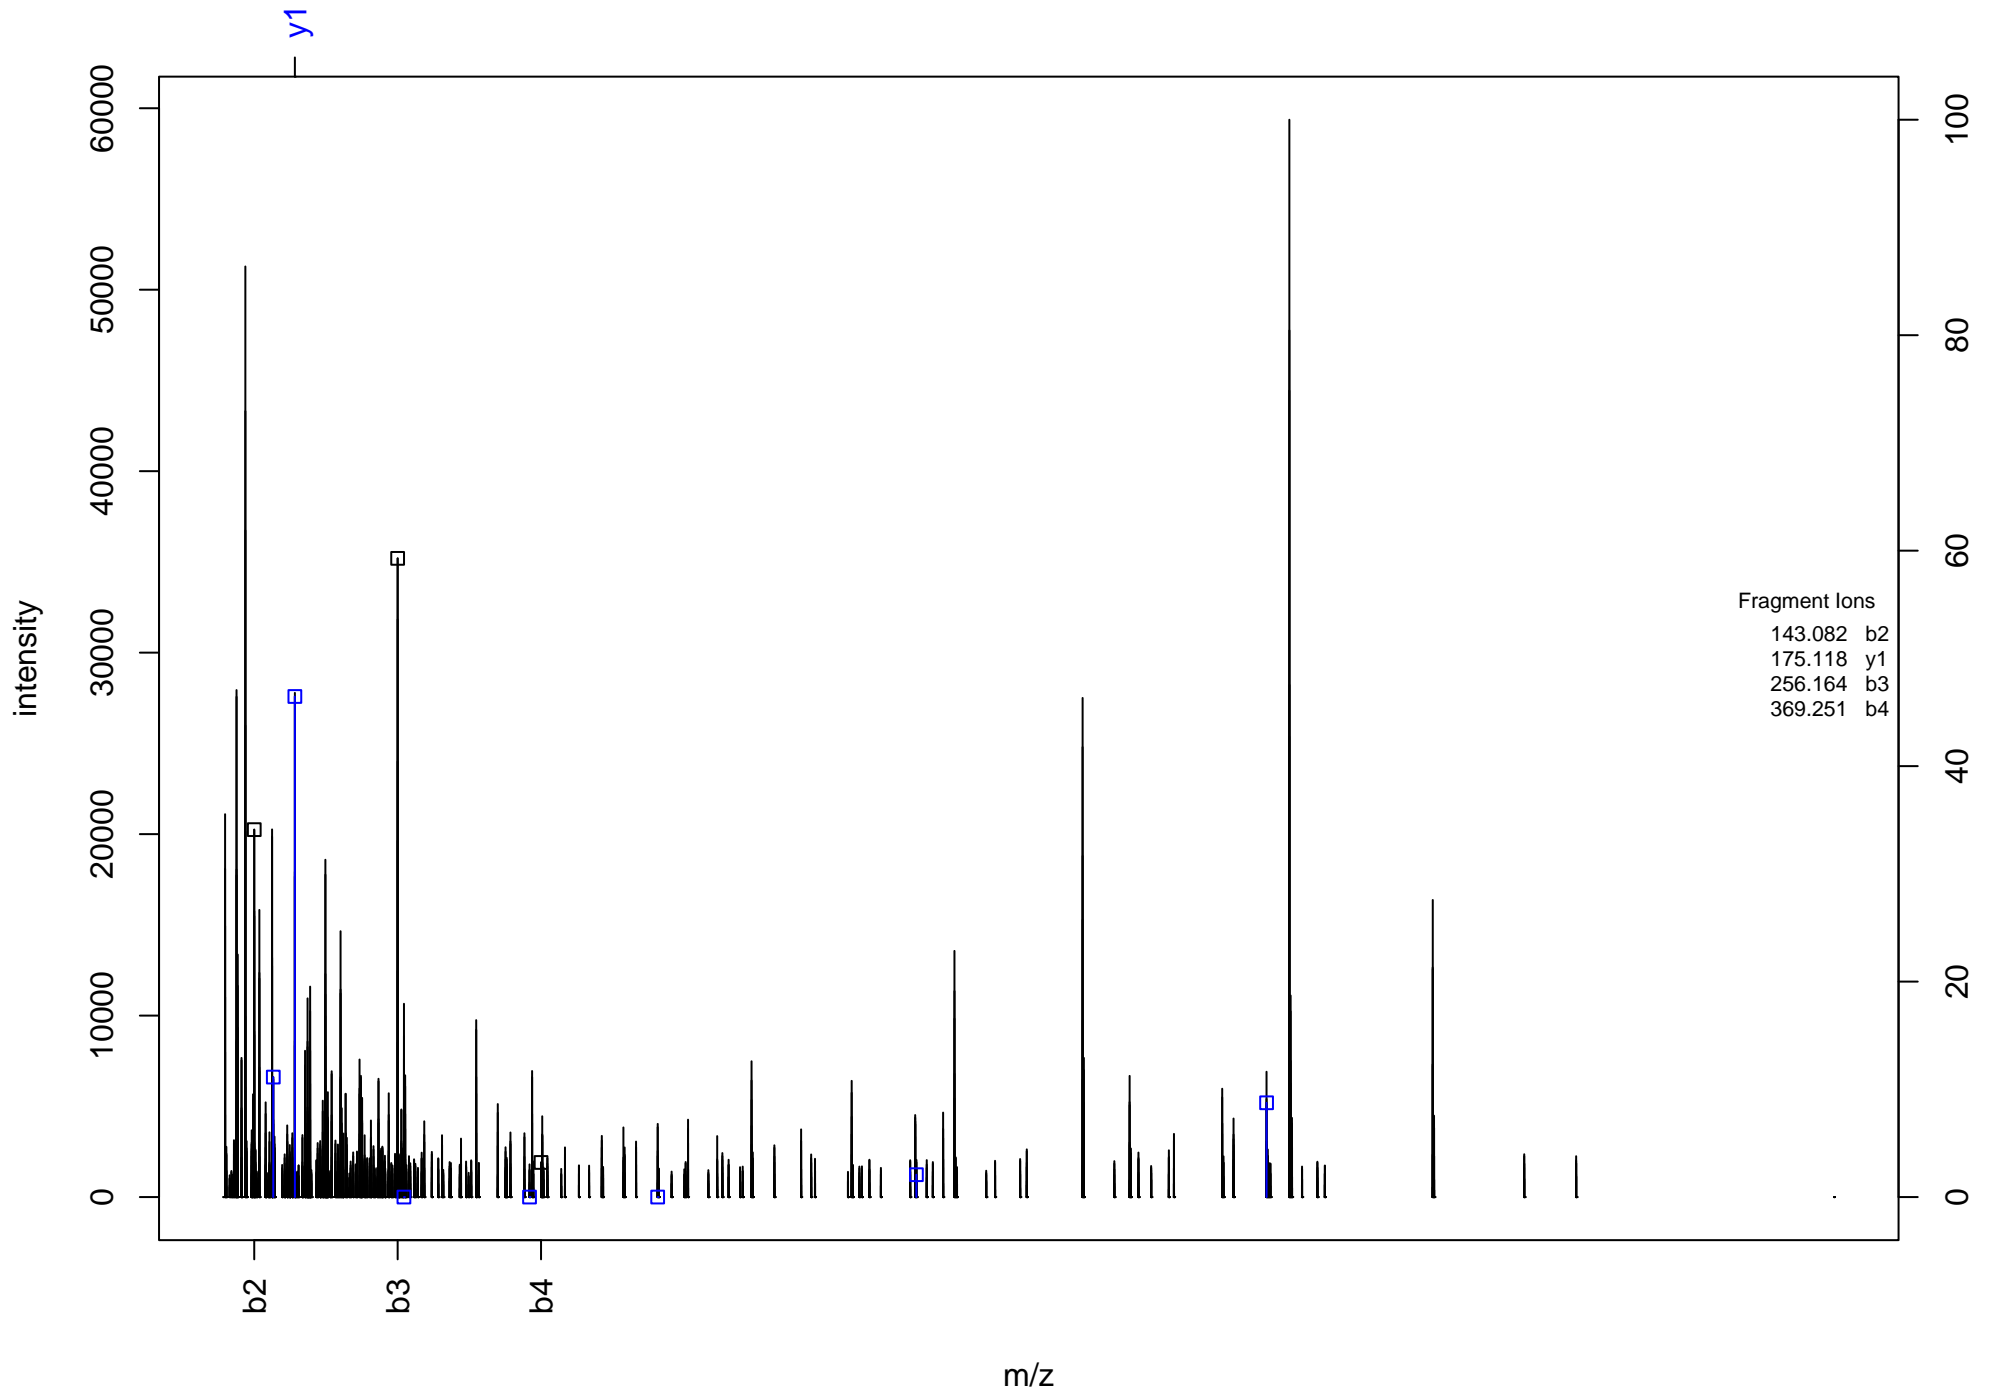

# N<sup>1</sup>L<sup>1</sup>F<sup>1</sup>Q<sup>1</sup>N<sup>1</sup>A<sup>1</sup>F<sup>1</sup>T<sup>1</sup>K

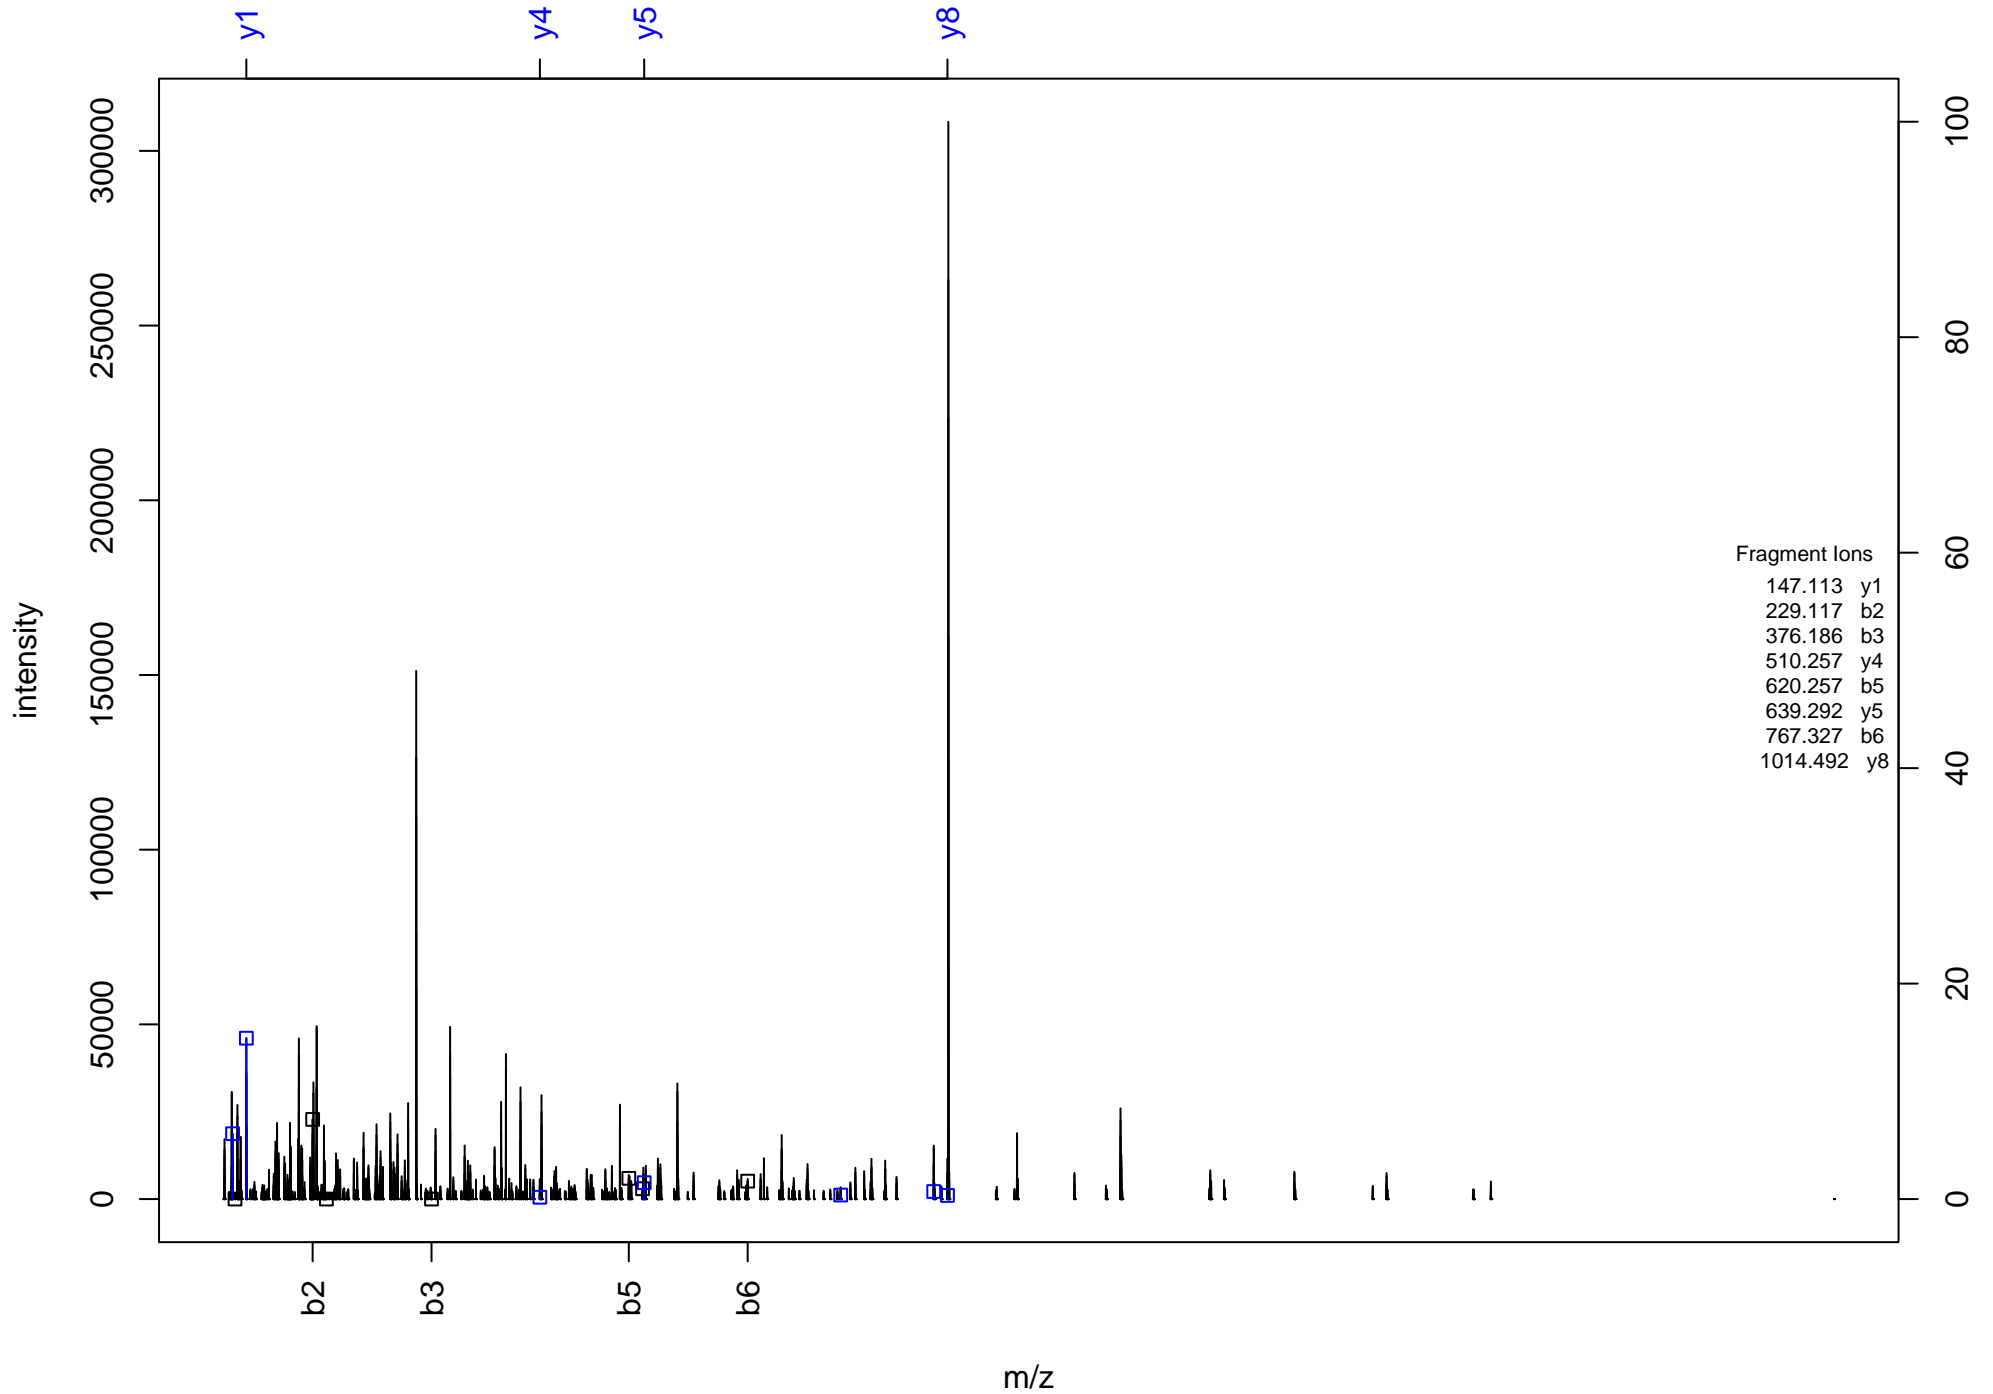

# VSILIGASQDLIPQLK

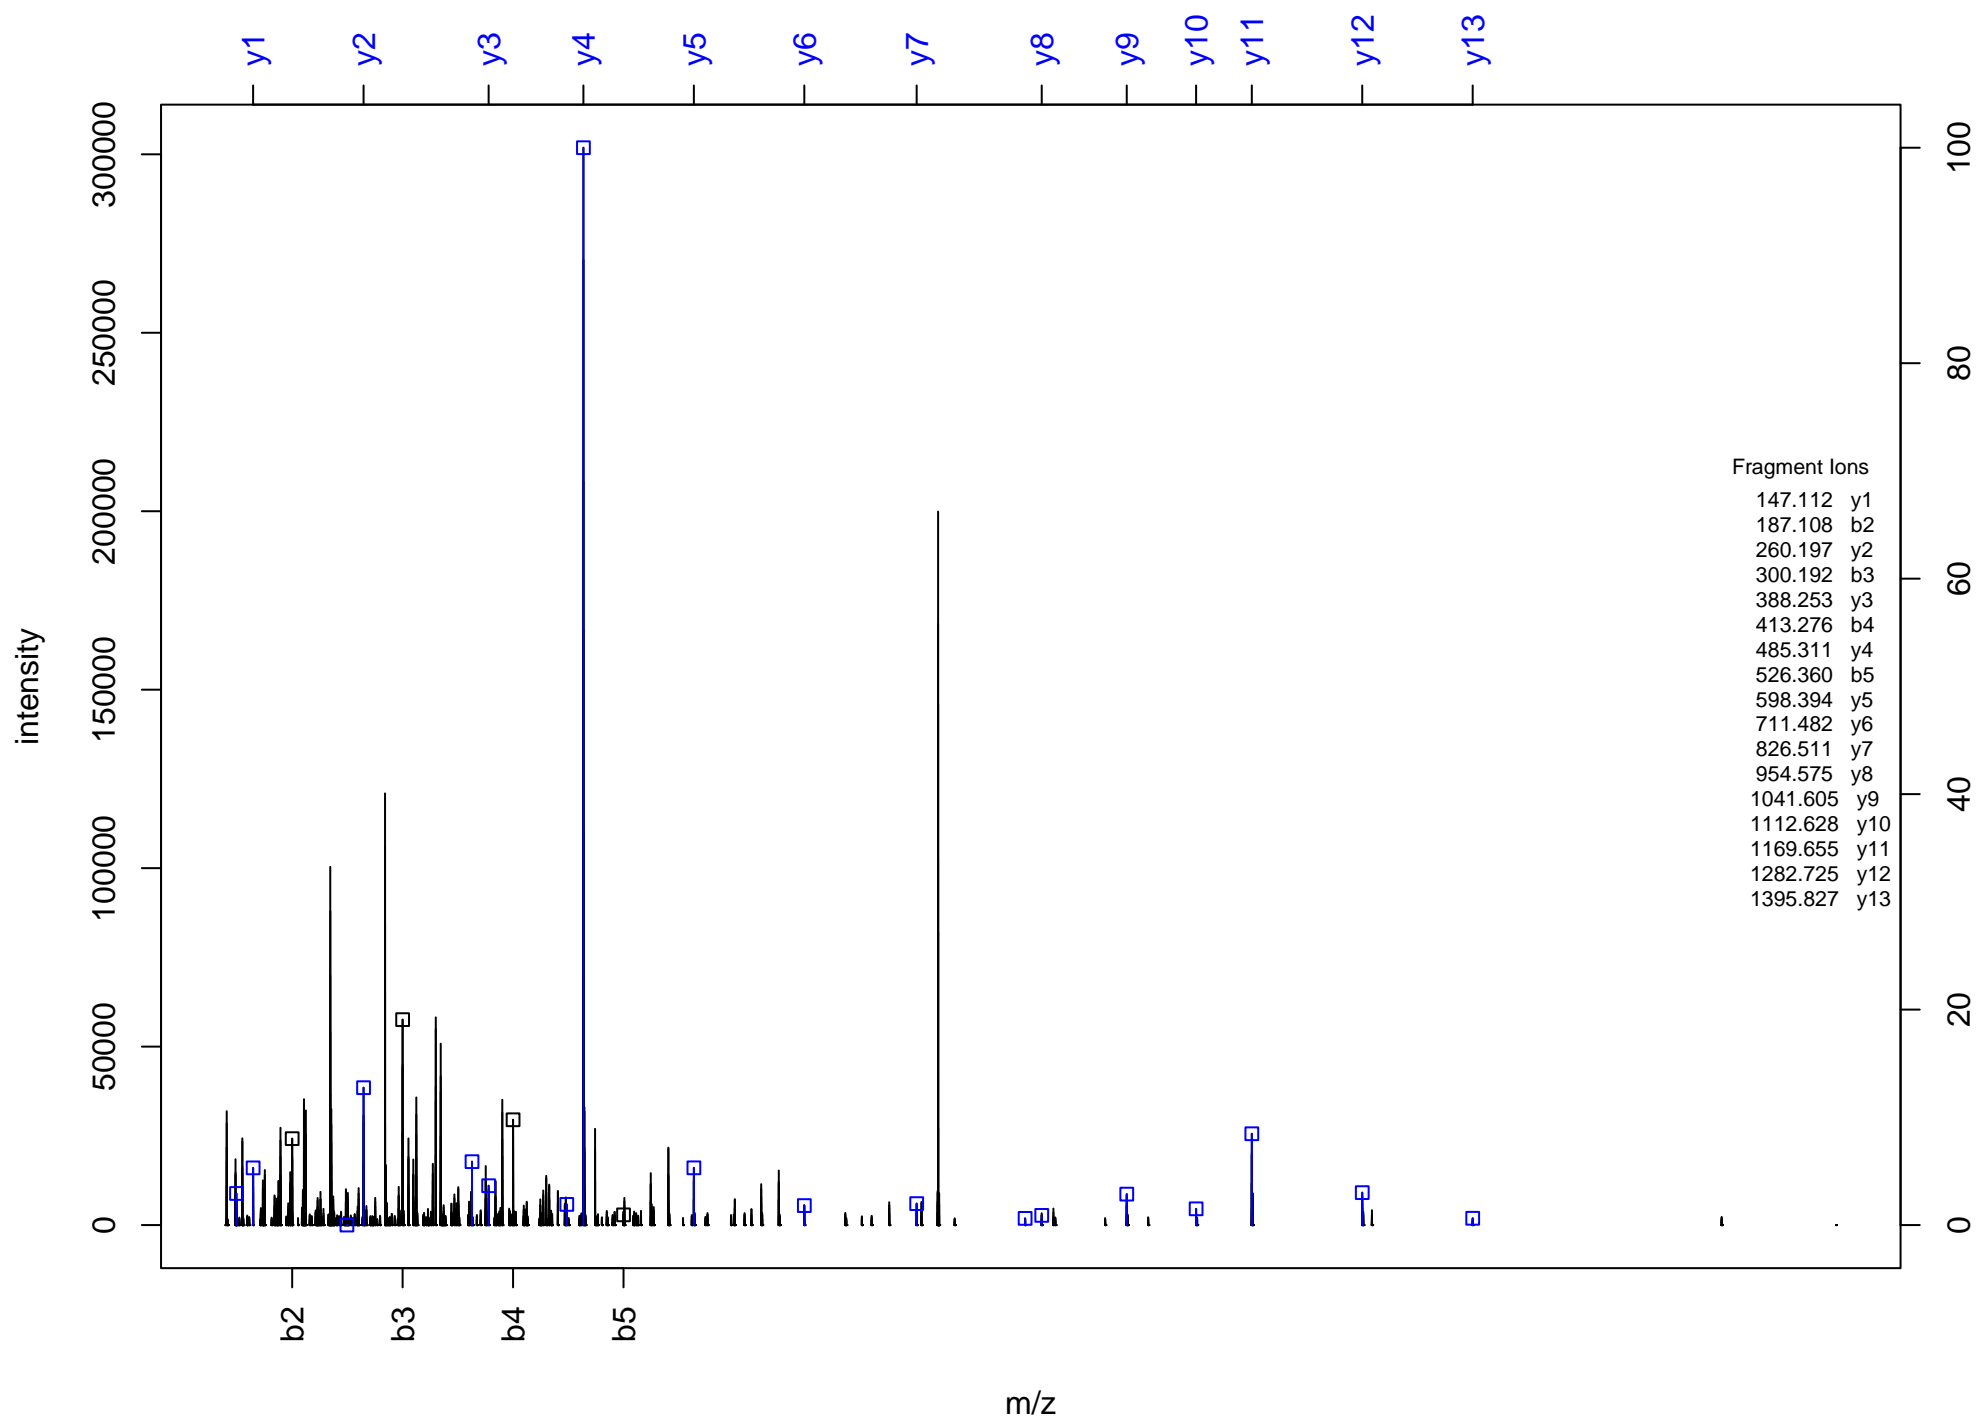



# AALAQAADCEVEQWNSDDPIPR

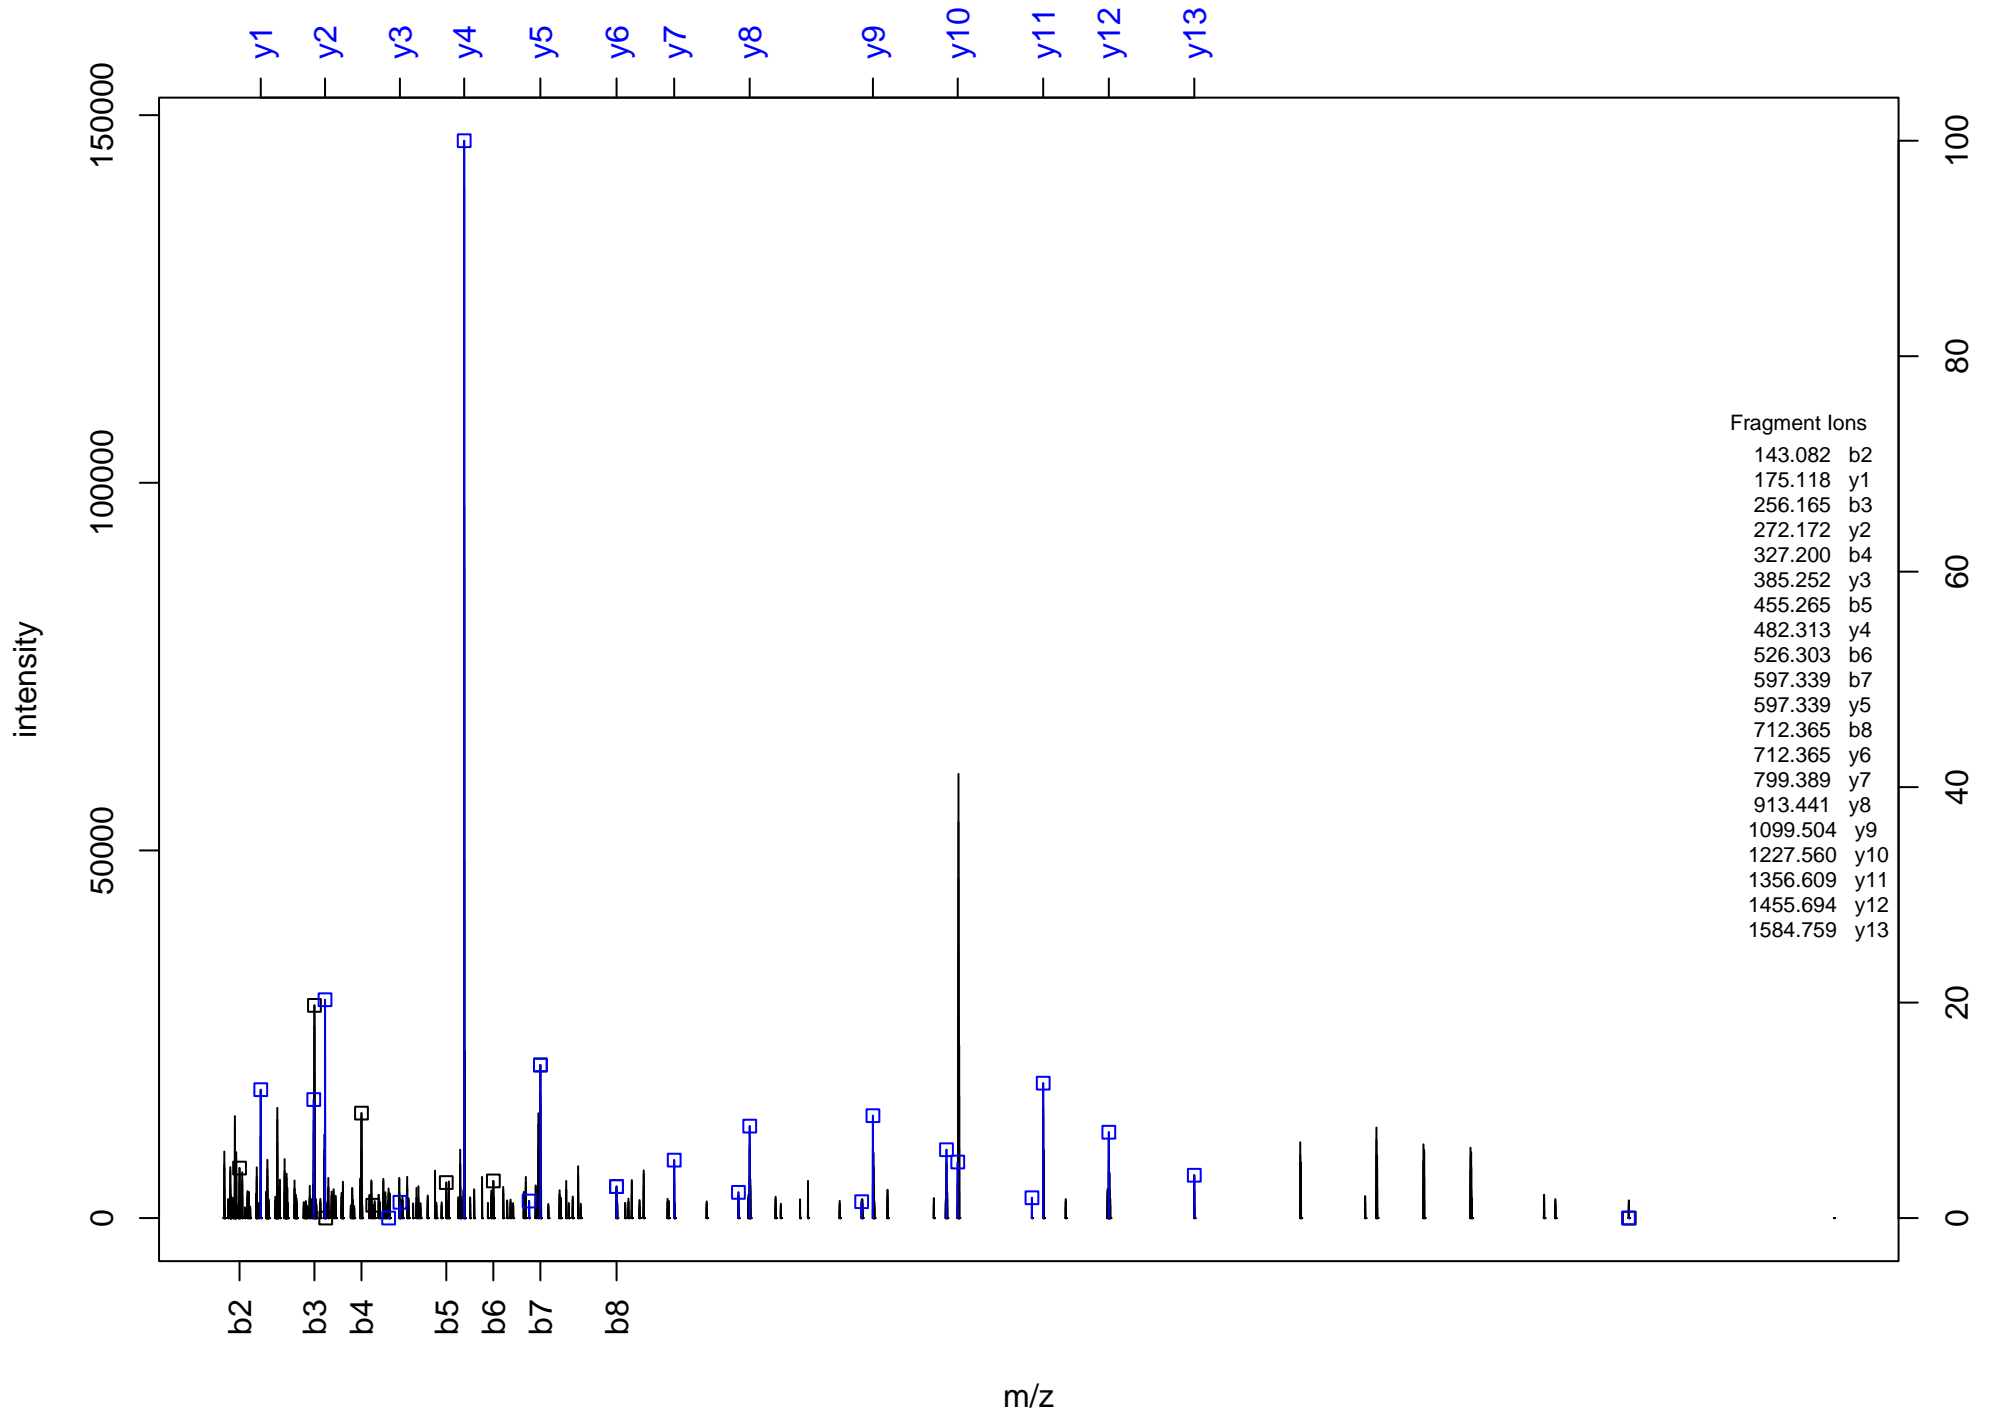

# EDTSEEVVPVLVNNWK

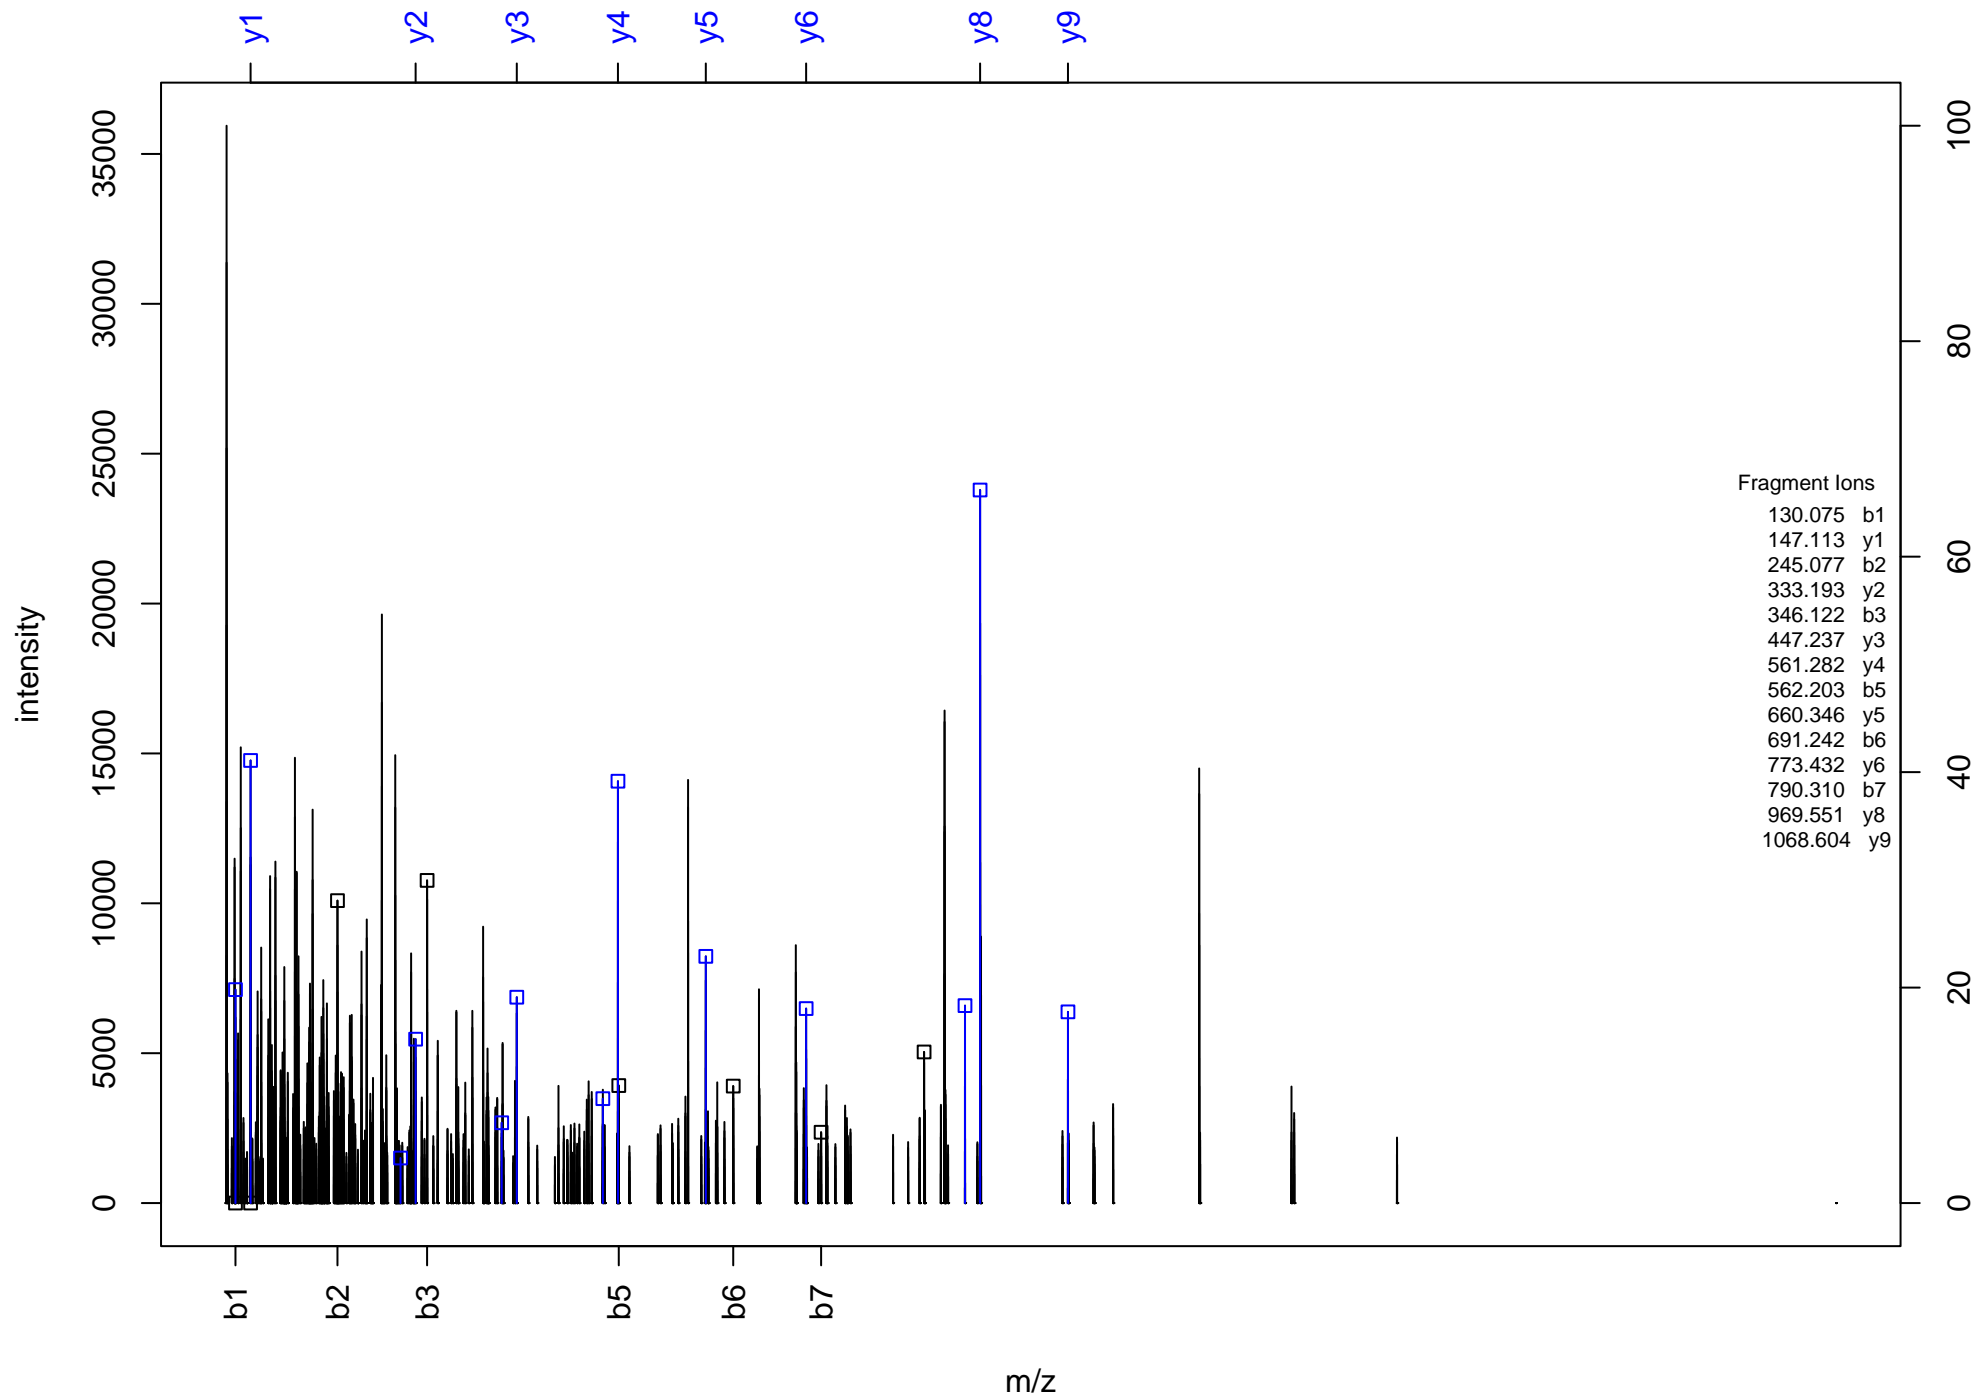

# N^M\*RFLITHN^PTNATLNK

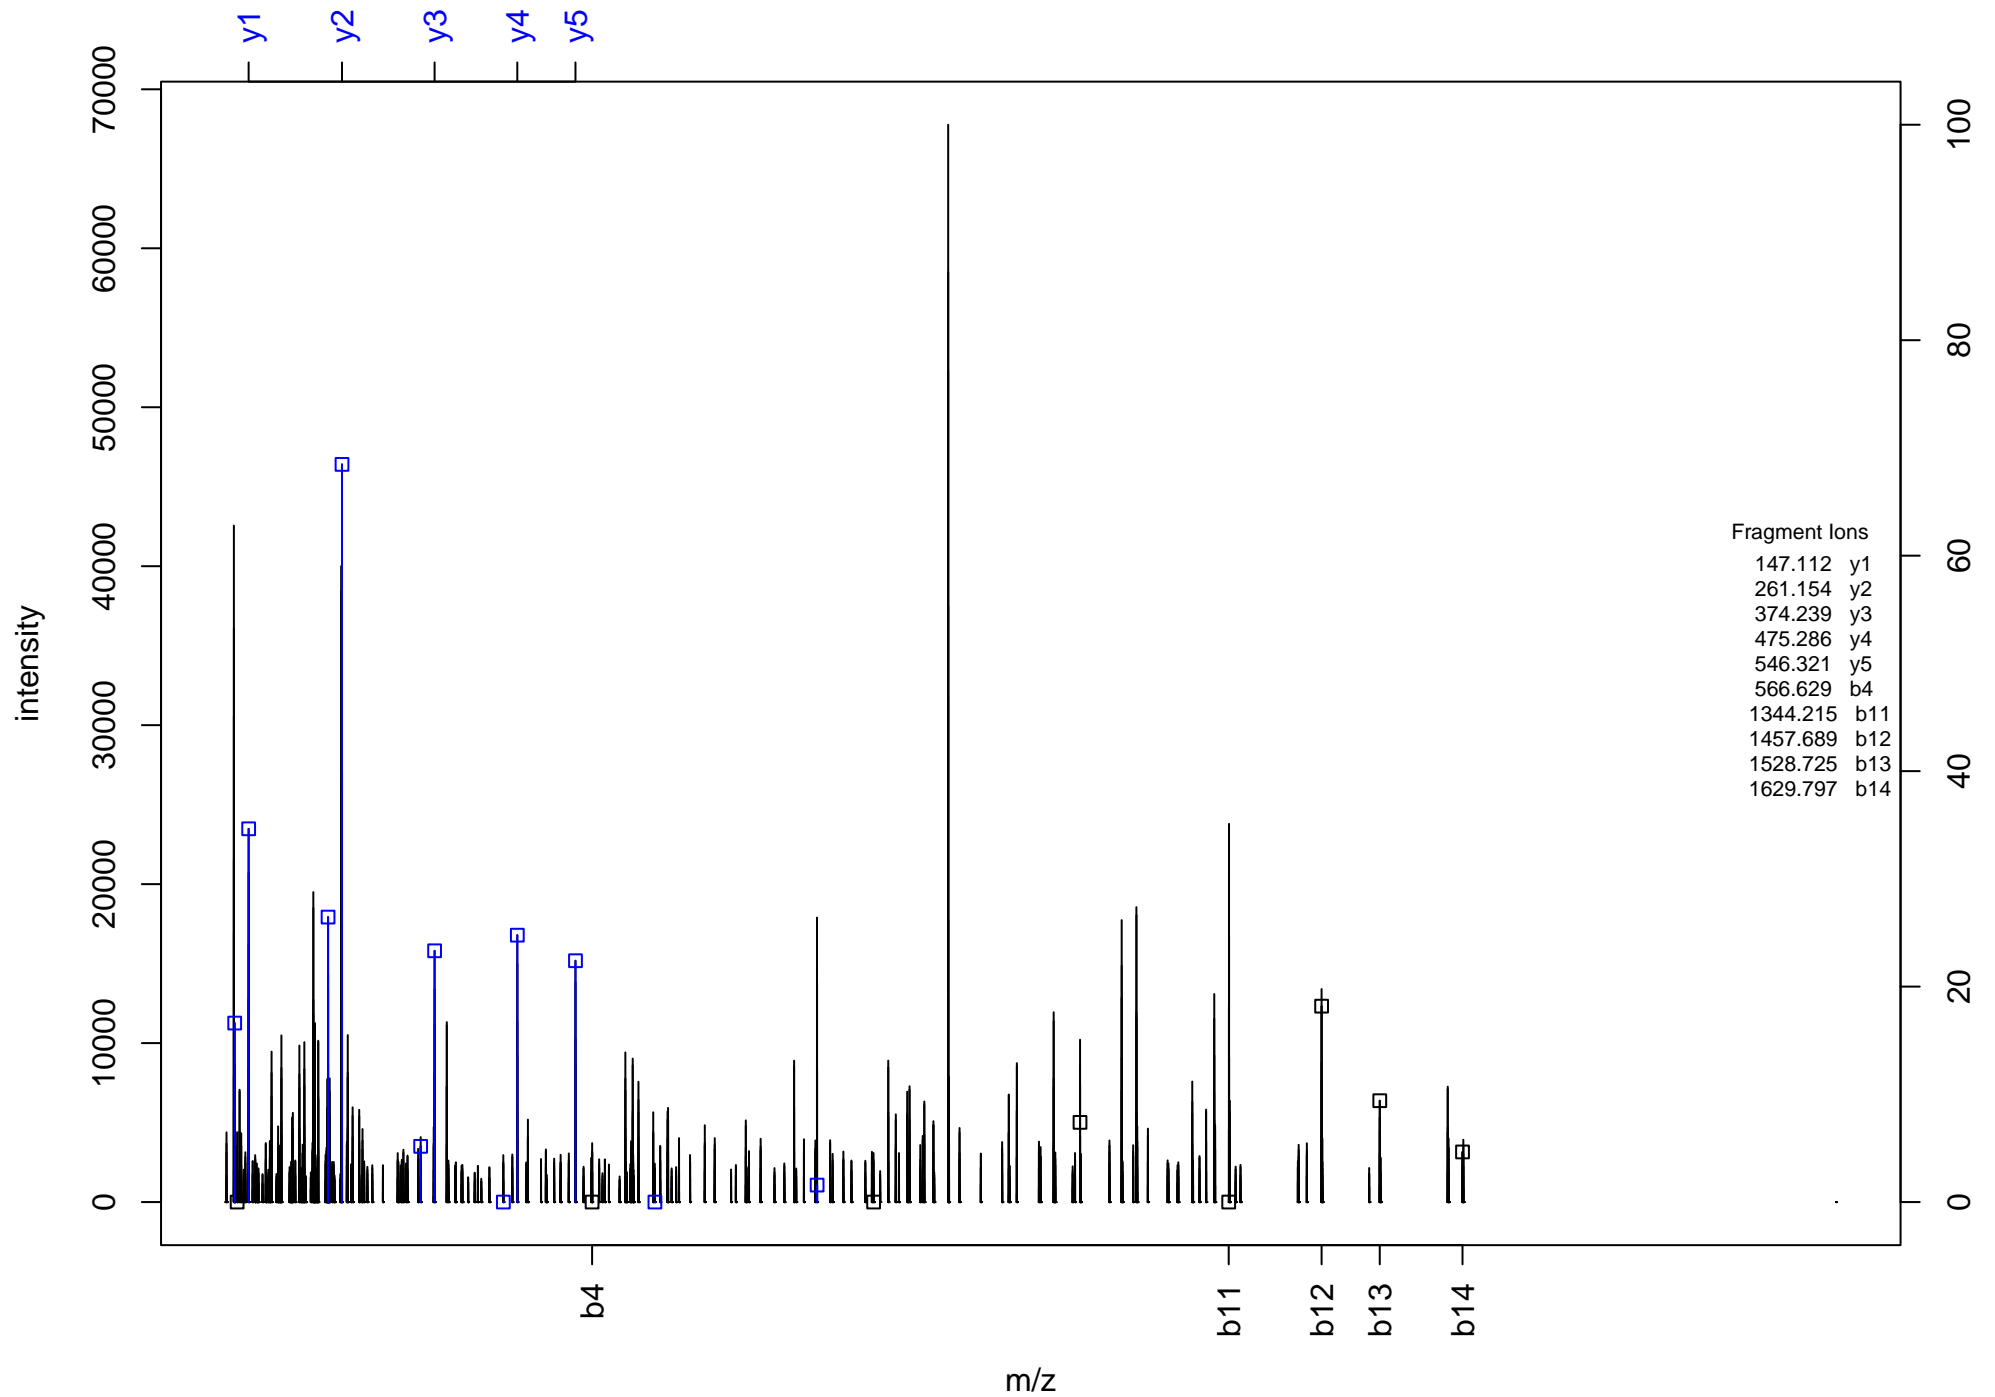

# VLLLEANR

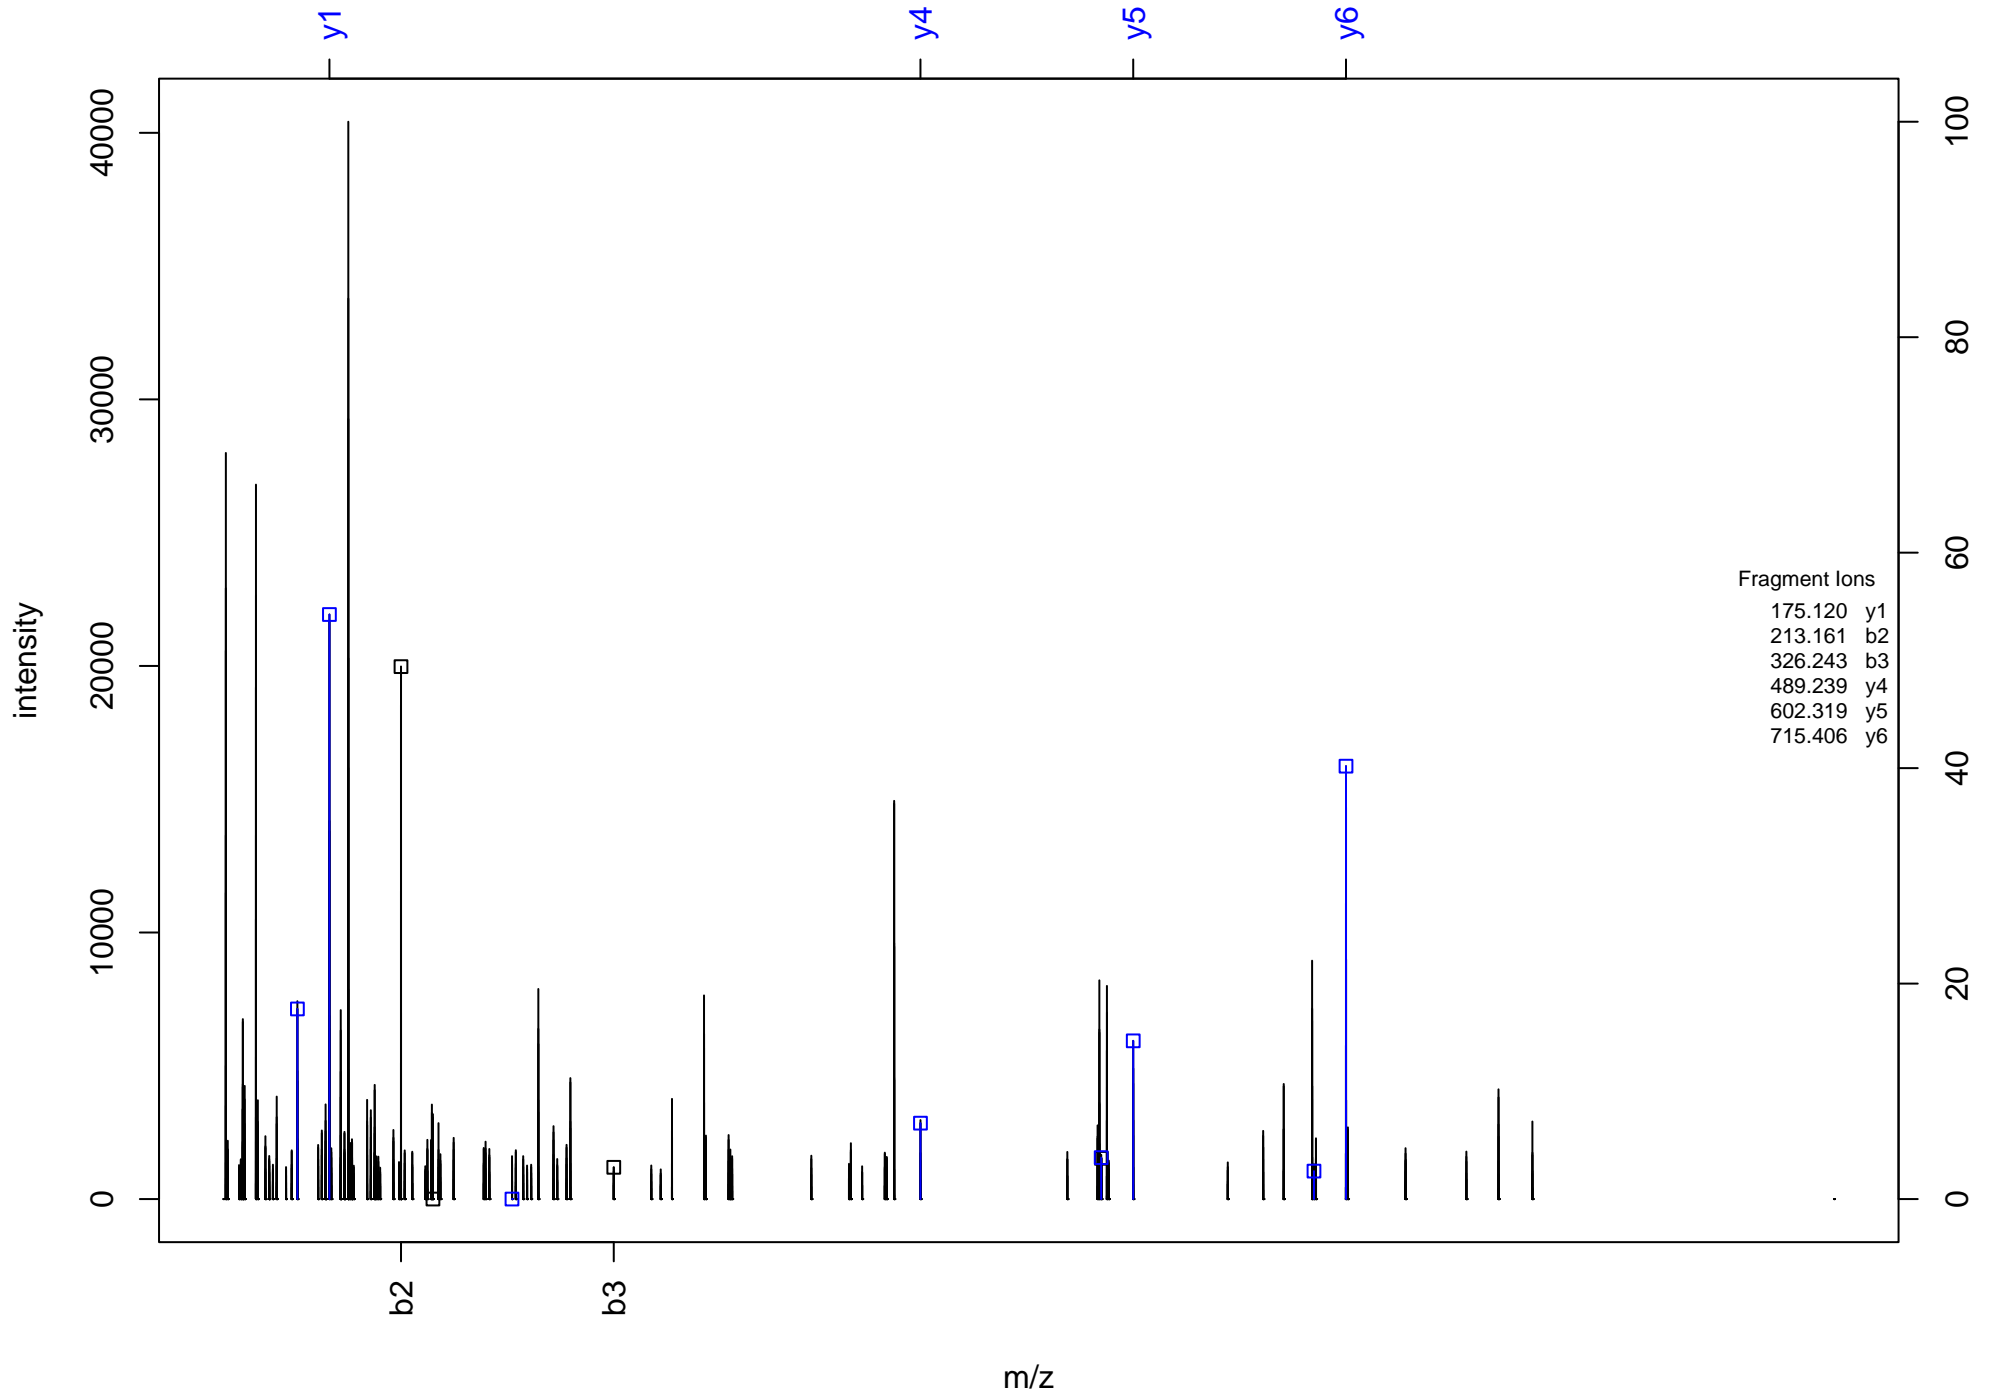

Fragment Ions  
175.120 y1  
213.161 b2  
326.243 b3  
489.239 y4  
602.319 y5  
715.406 y6

# LPLIVEDFVK

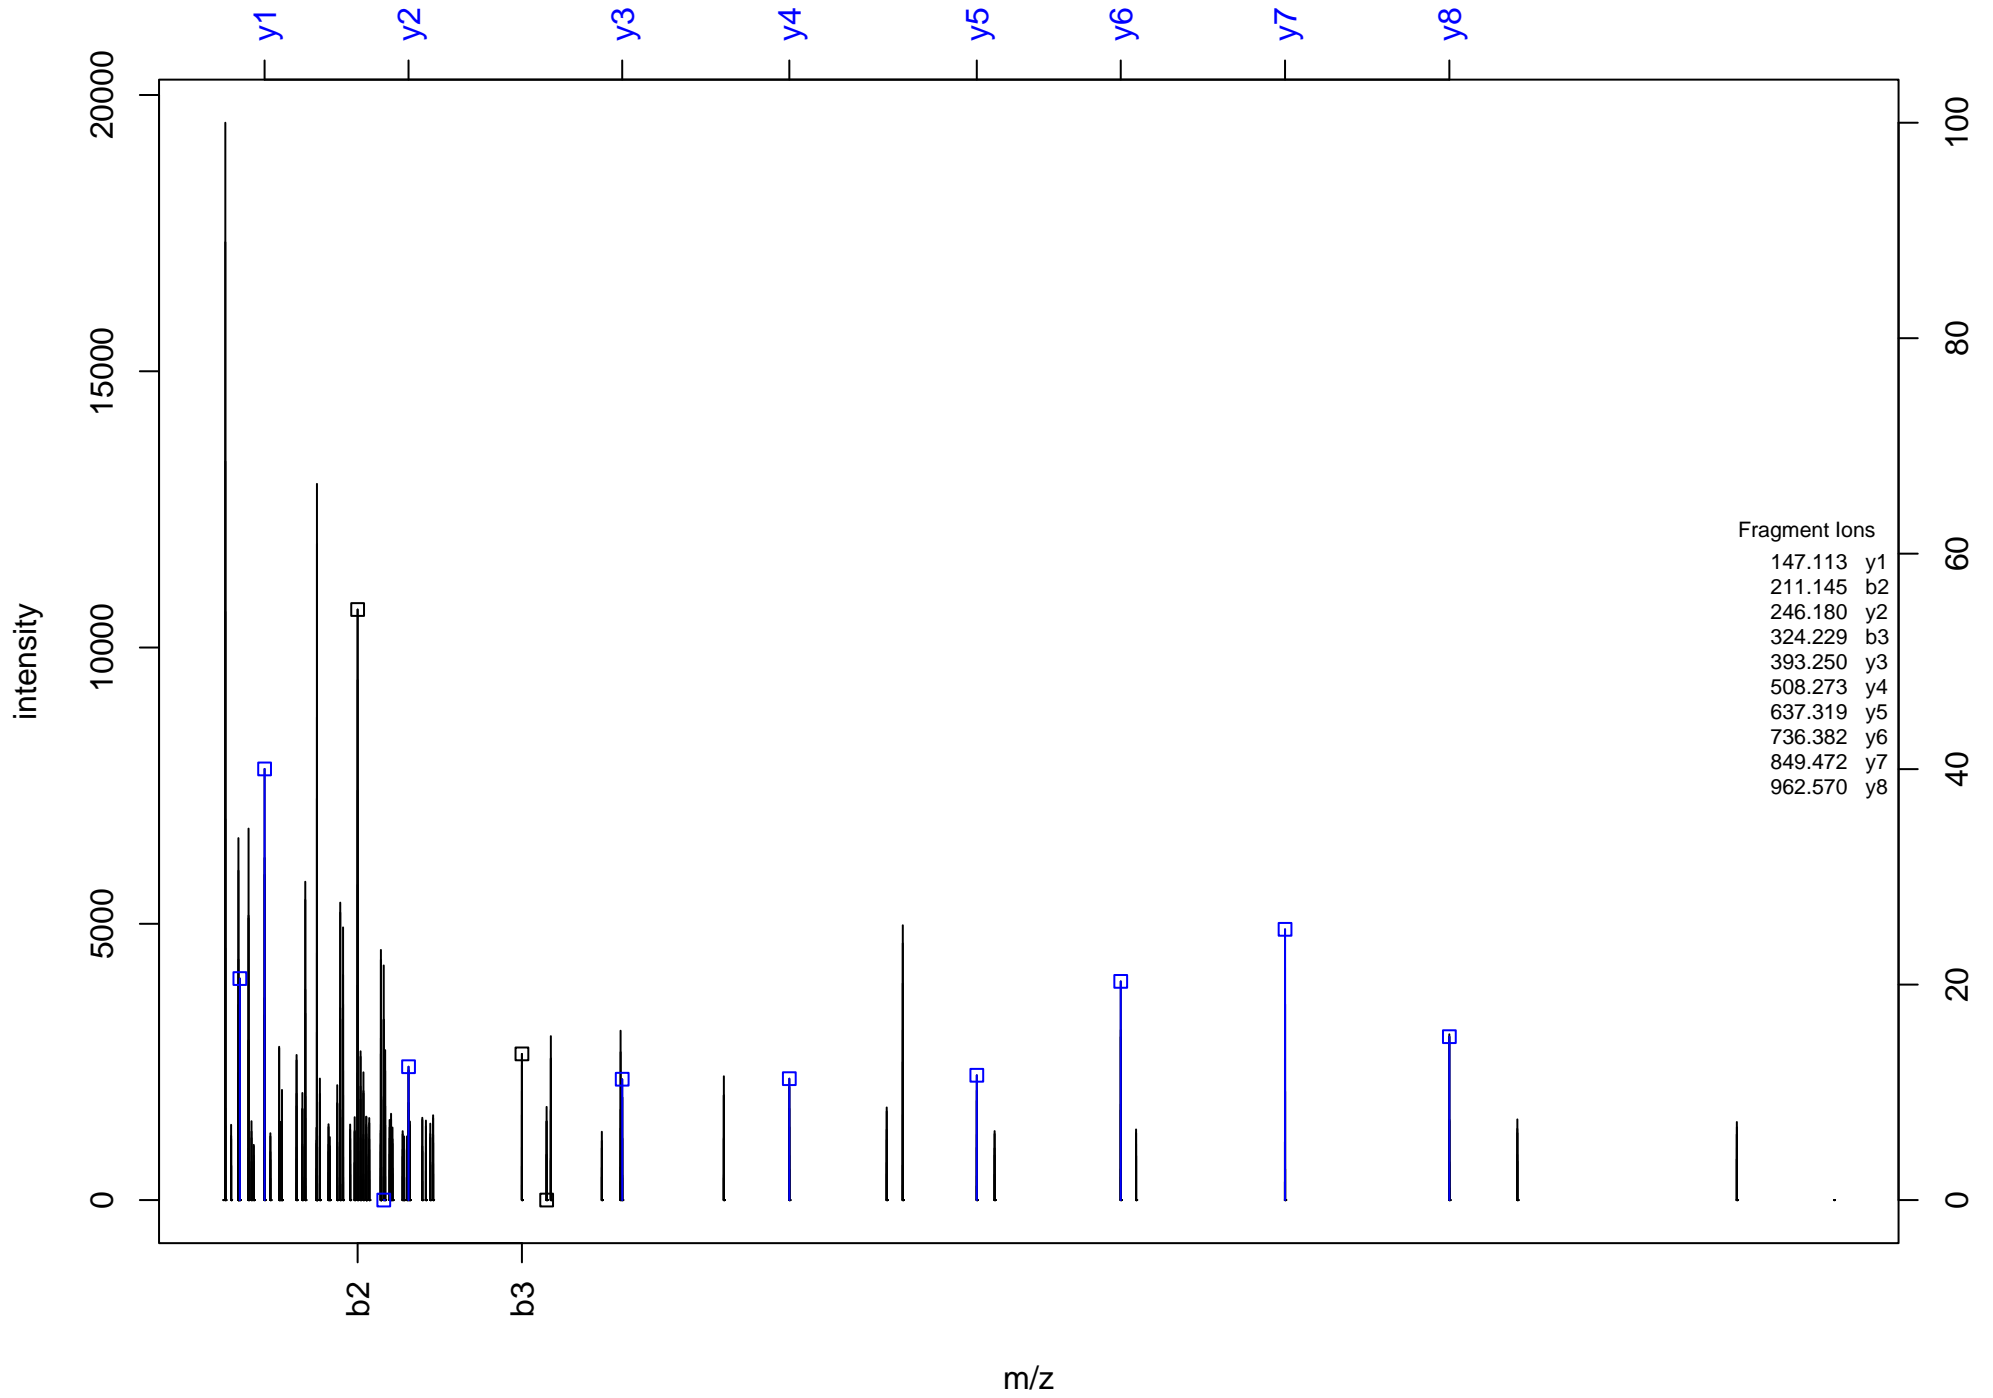

# DYDWTEPLSPTEDEFK

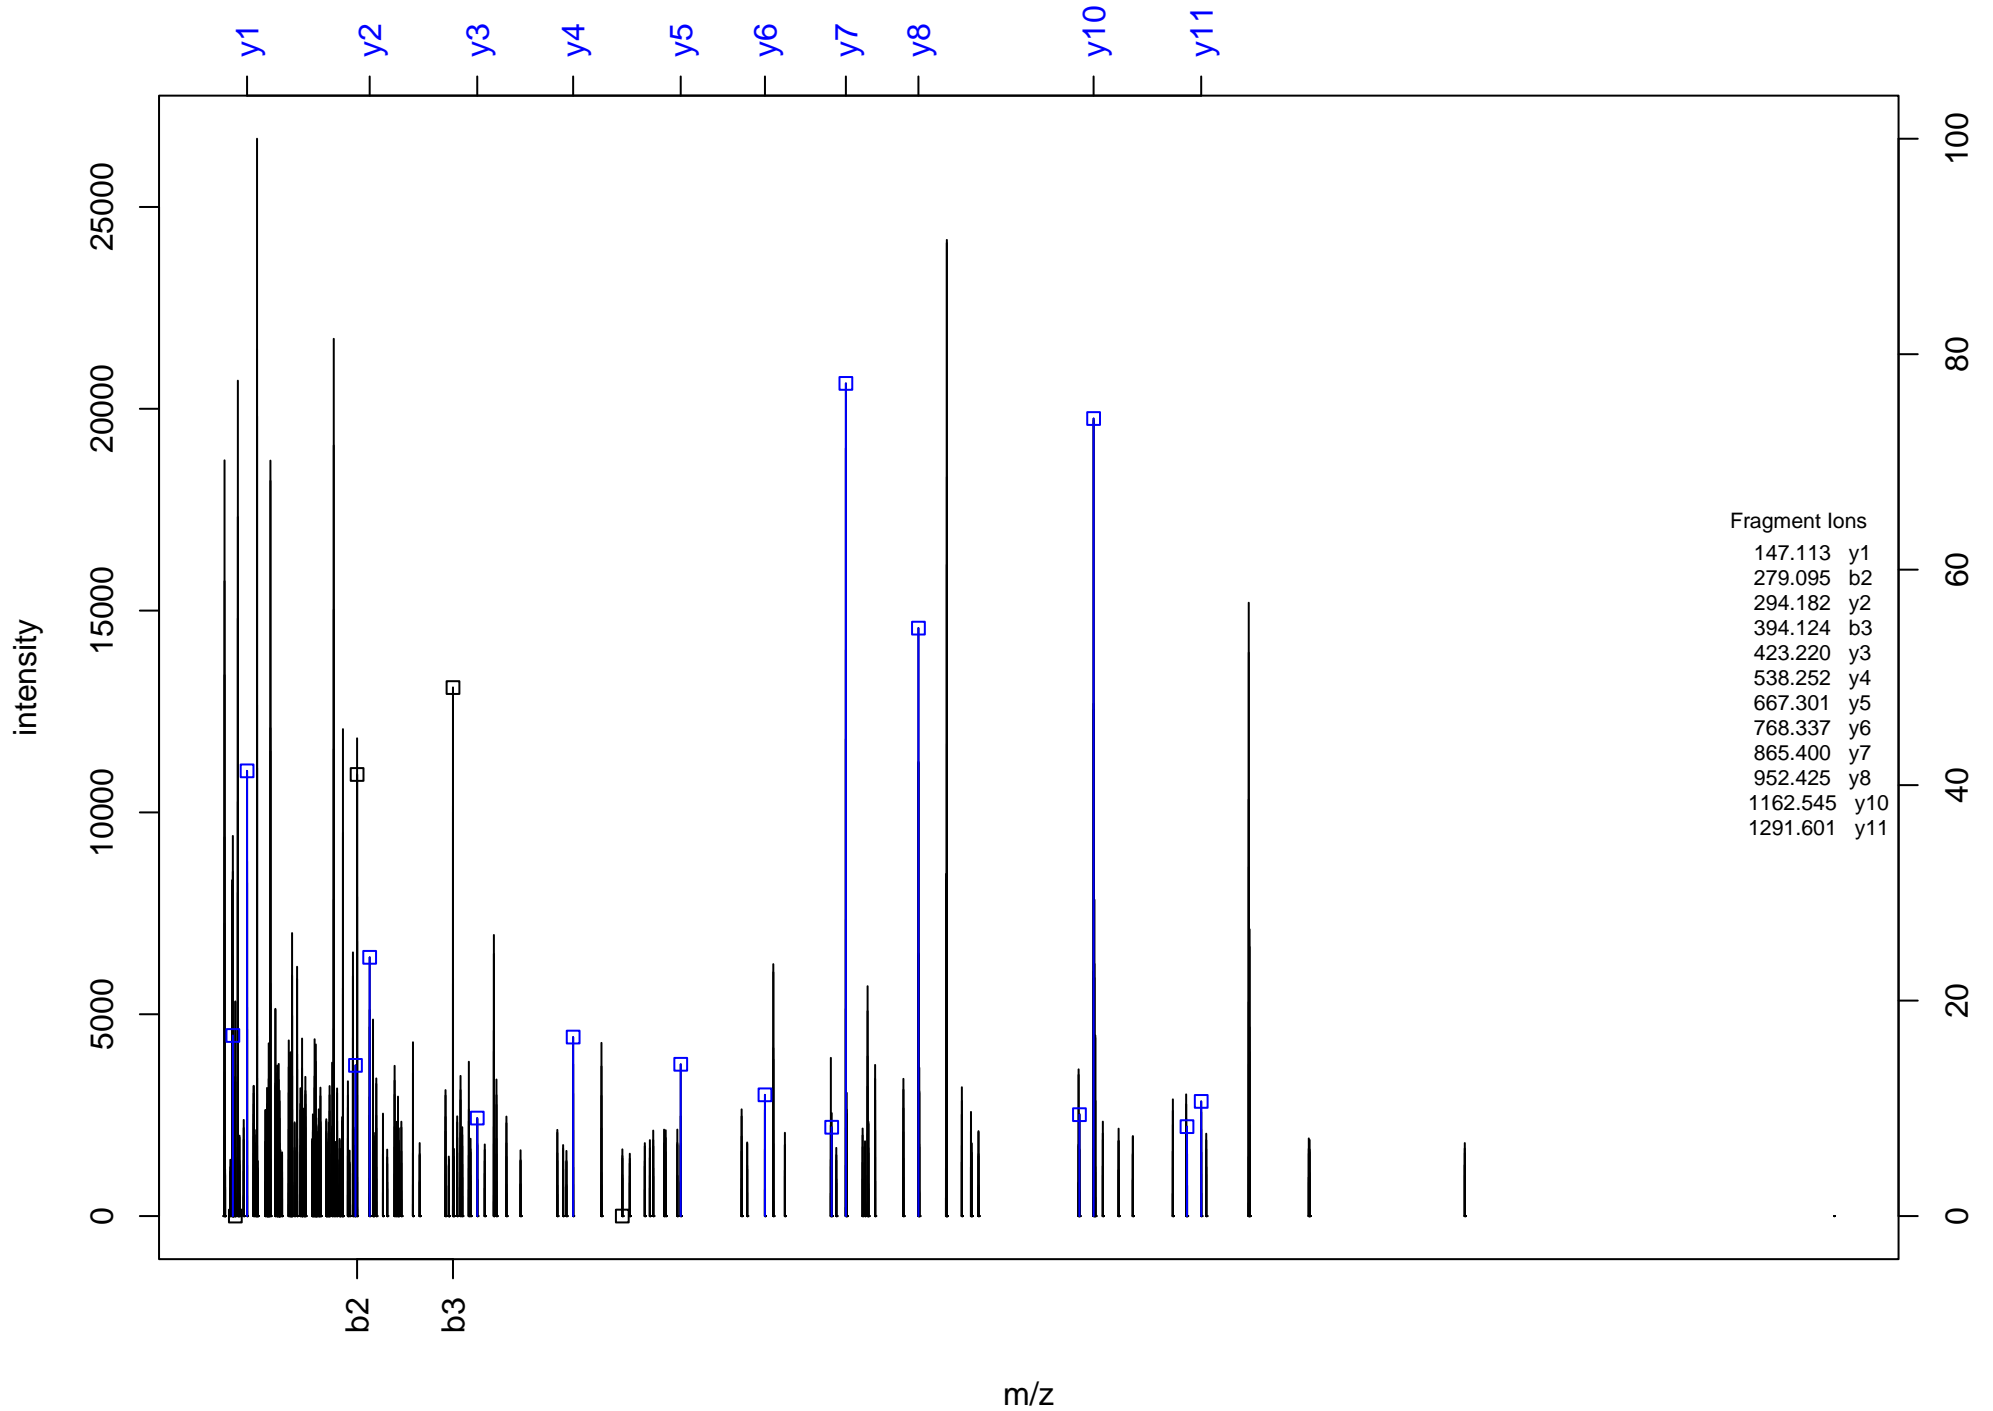

# TLEDVFLR

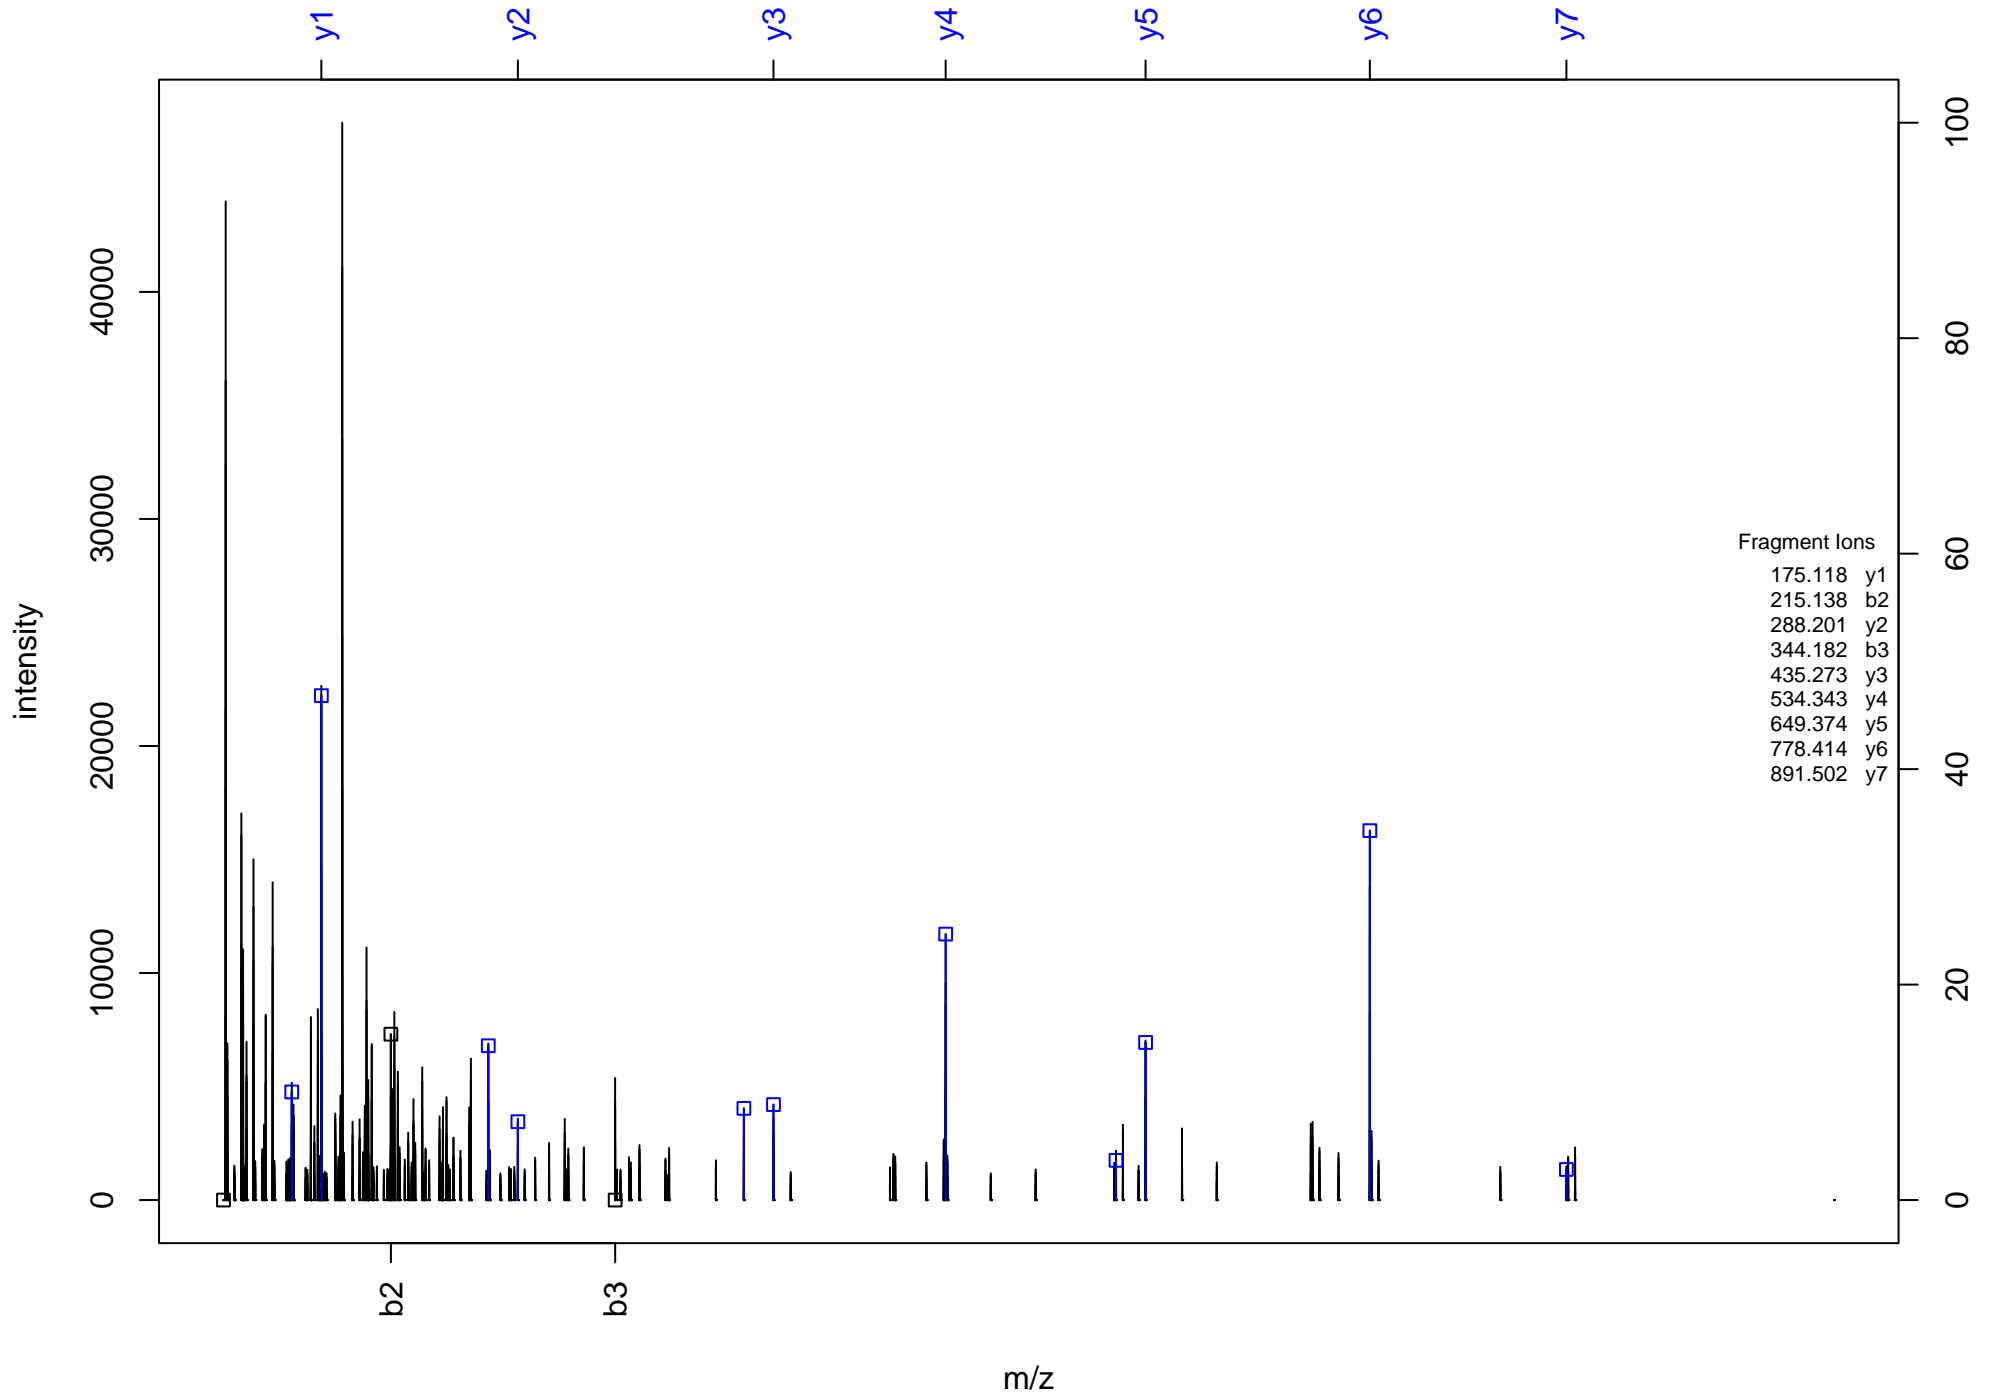

Q<sup>+</sup>AQ<sup>+</sup>TLVFTDN<sup>+</sup>Q<sup>+</sup>M\*DFR

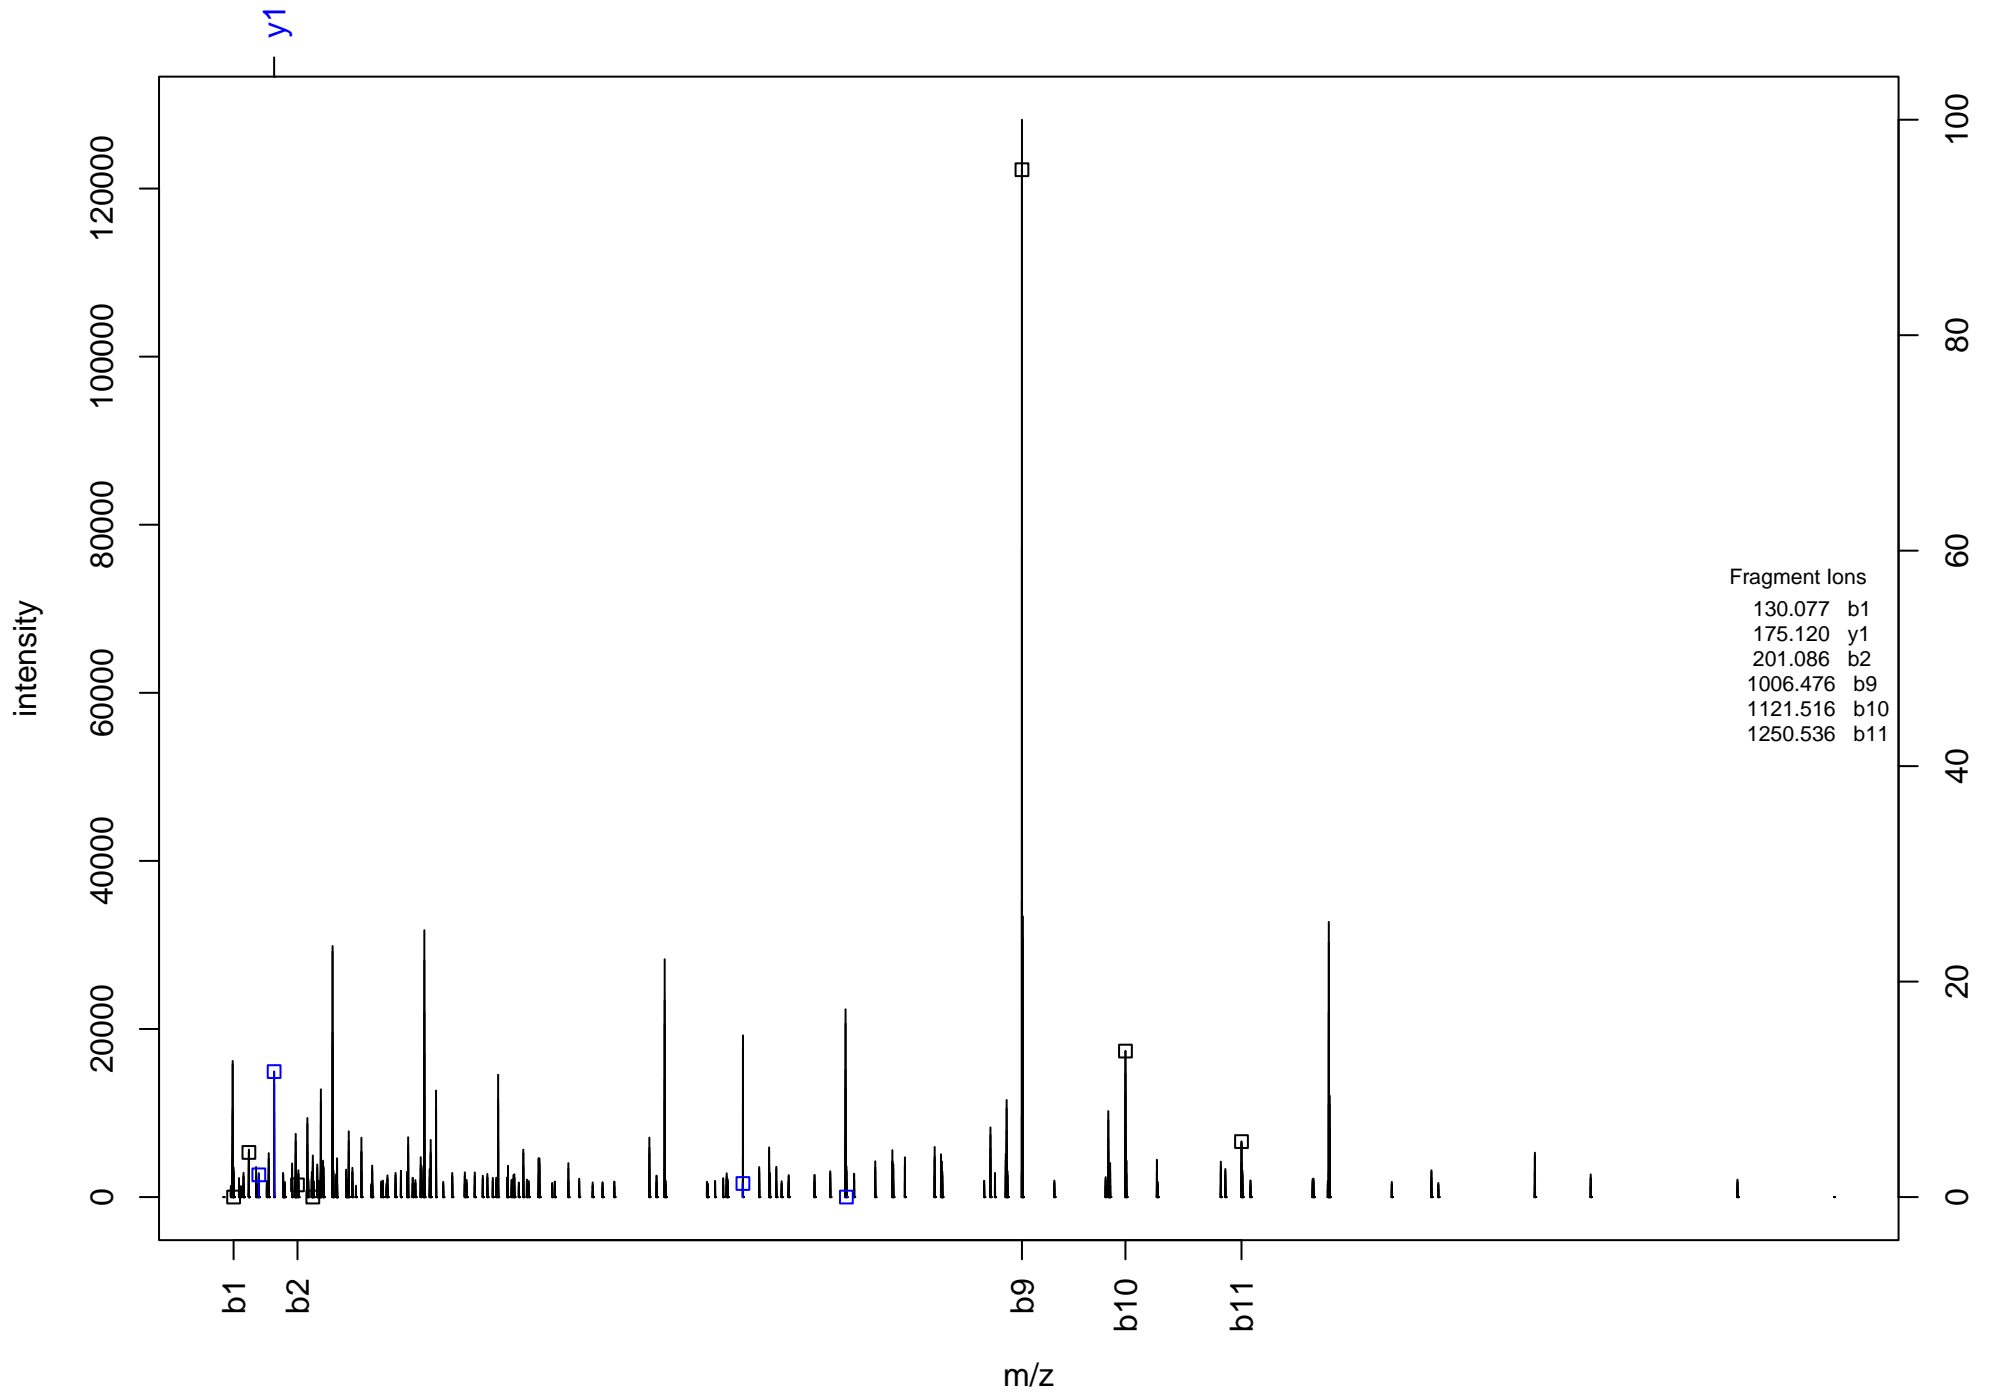



# VLAPDFDDEFDDEEPLPAIGTCK

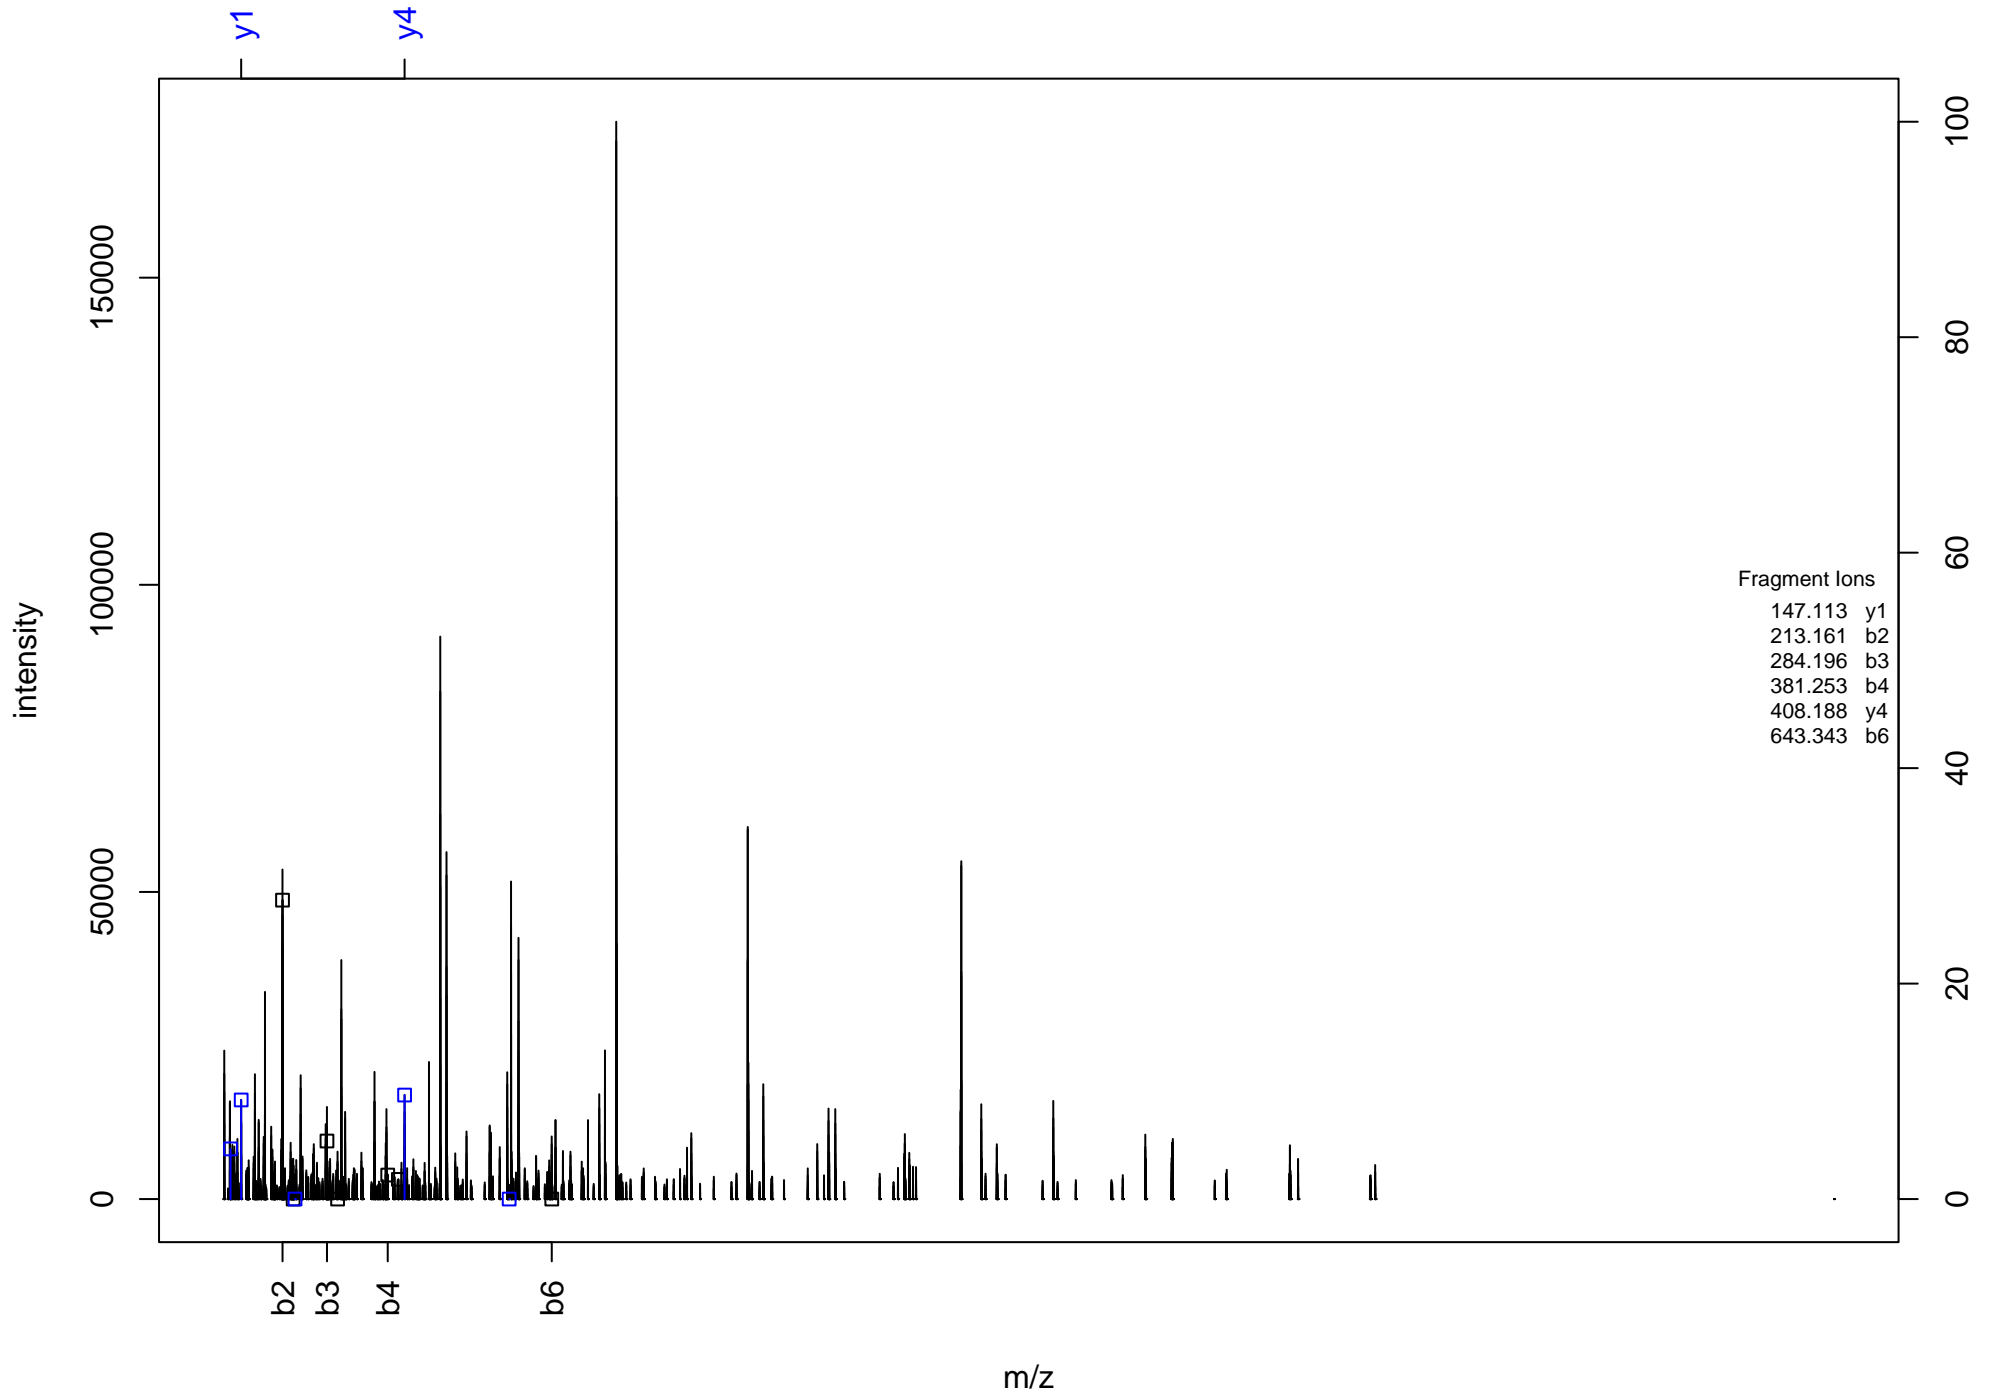

# LFQLTPPLSR

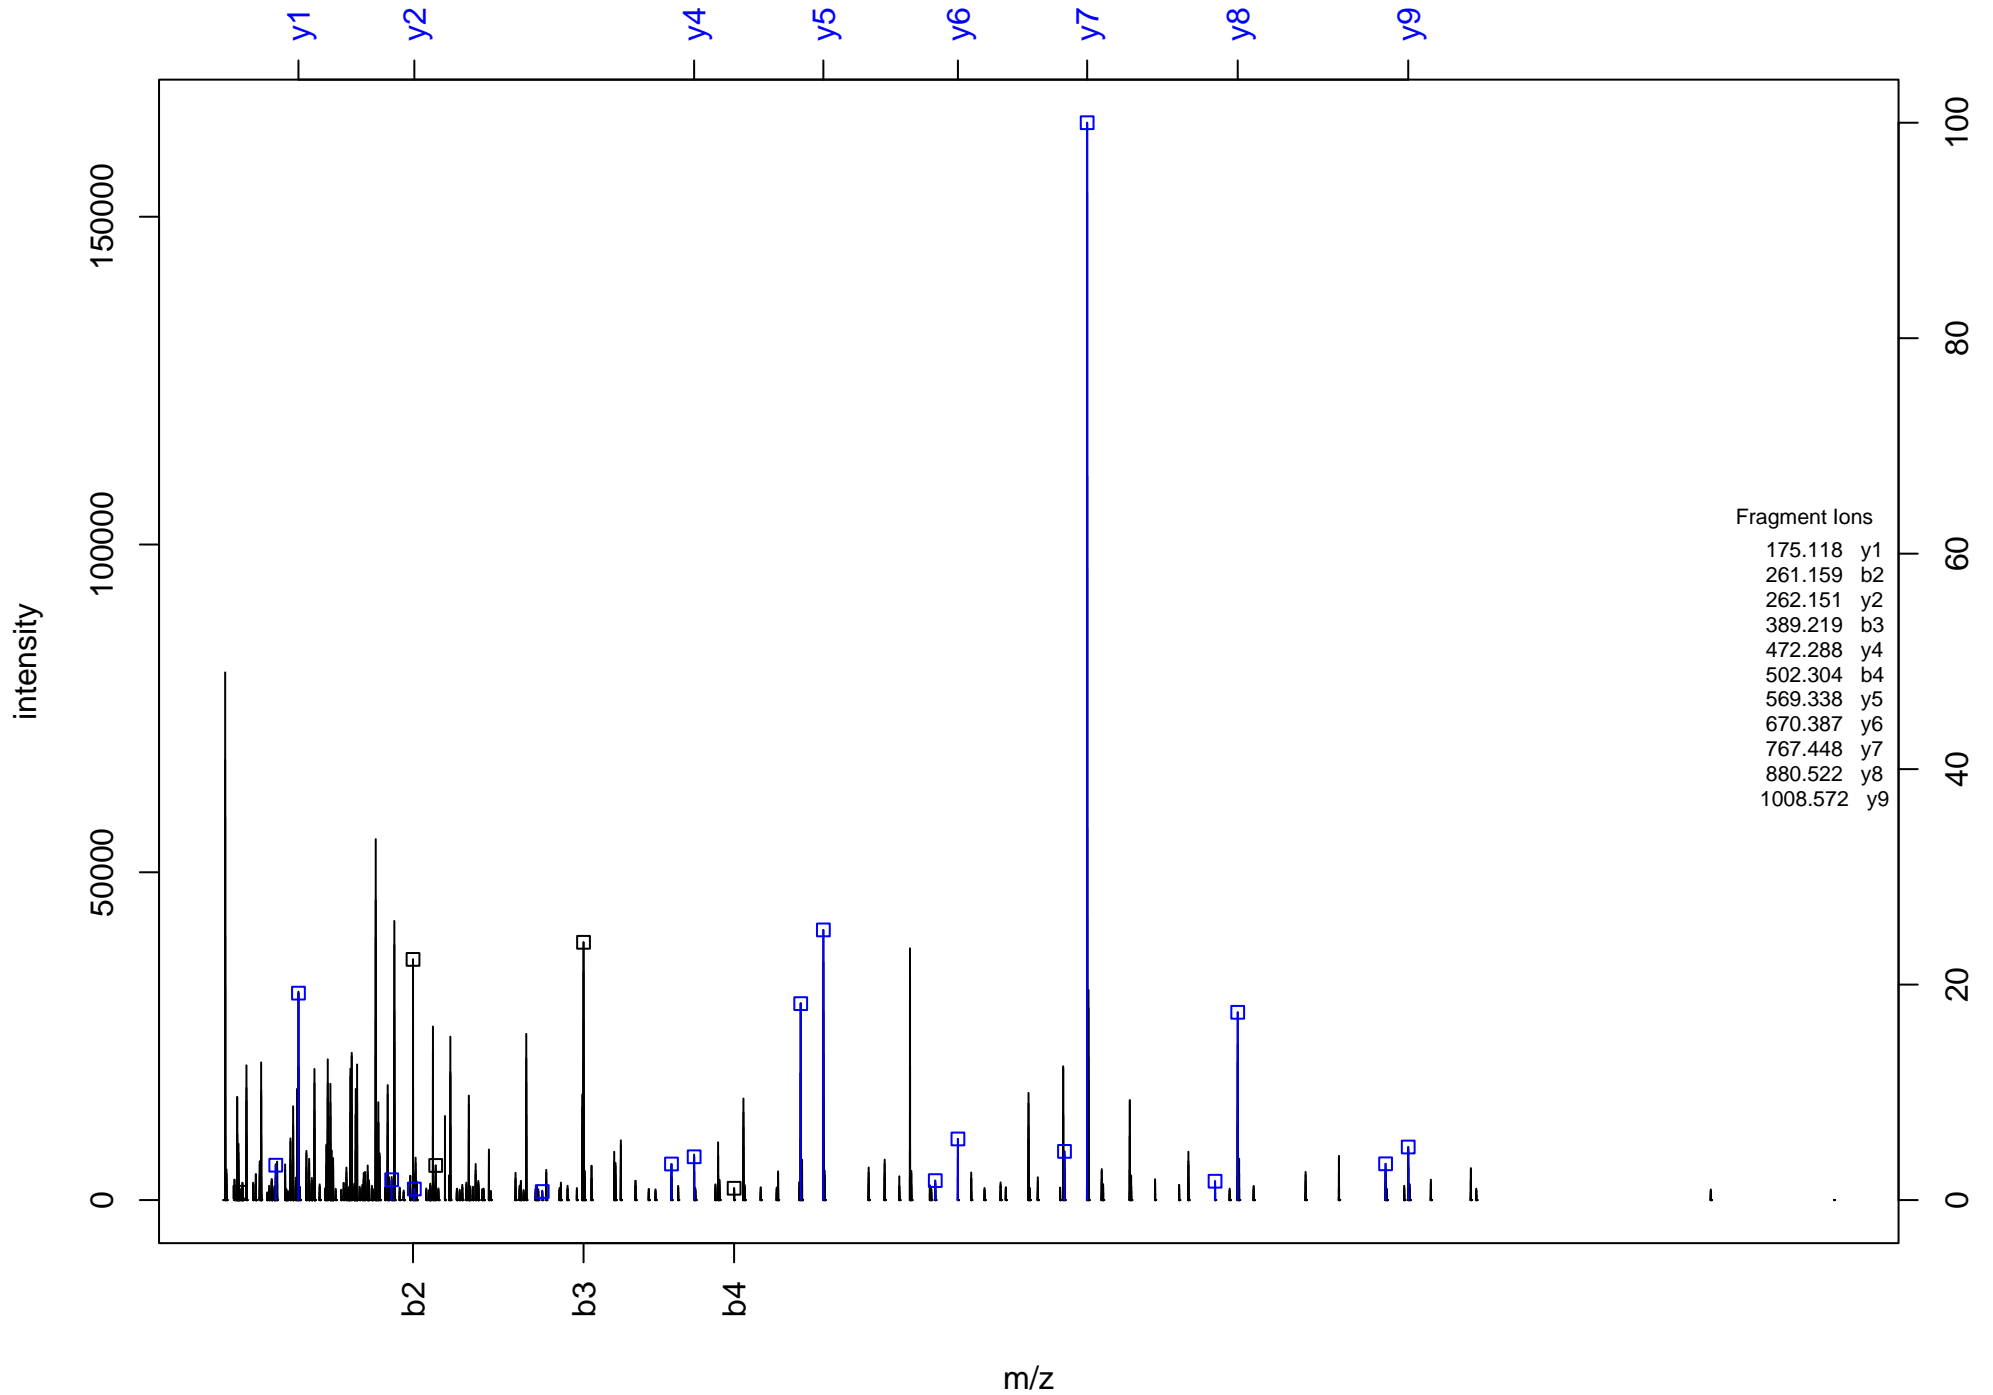

# TLWLF DINQDPEER

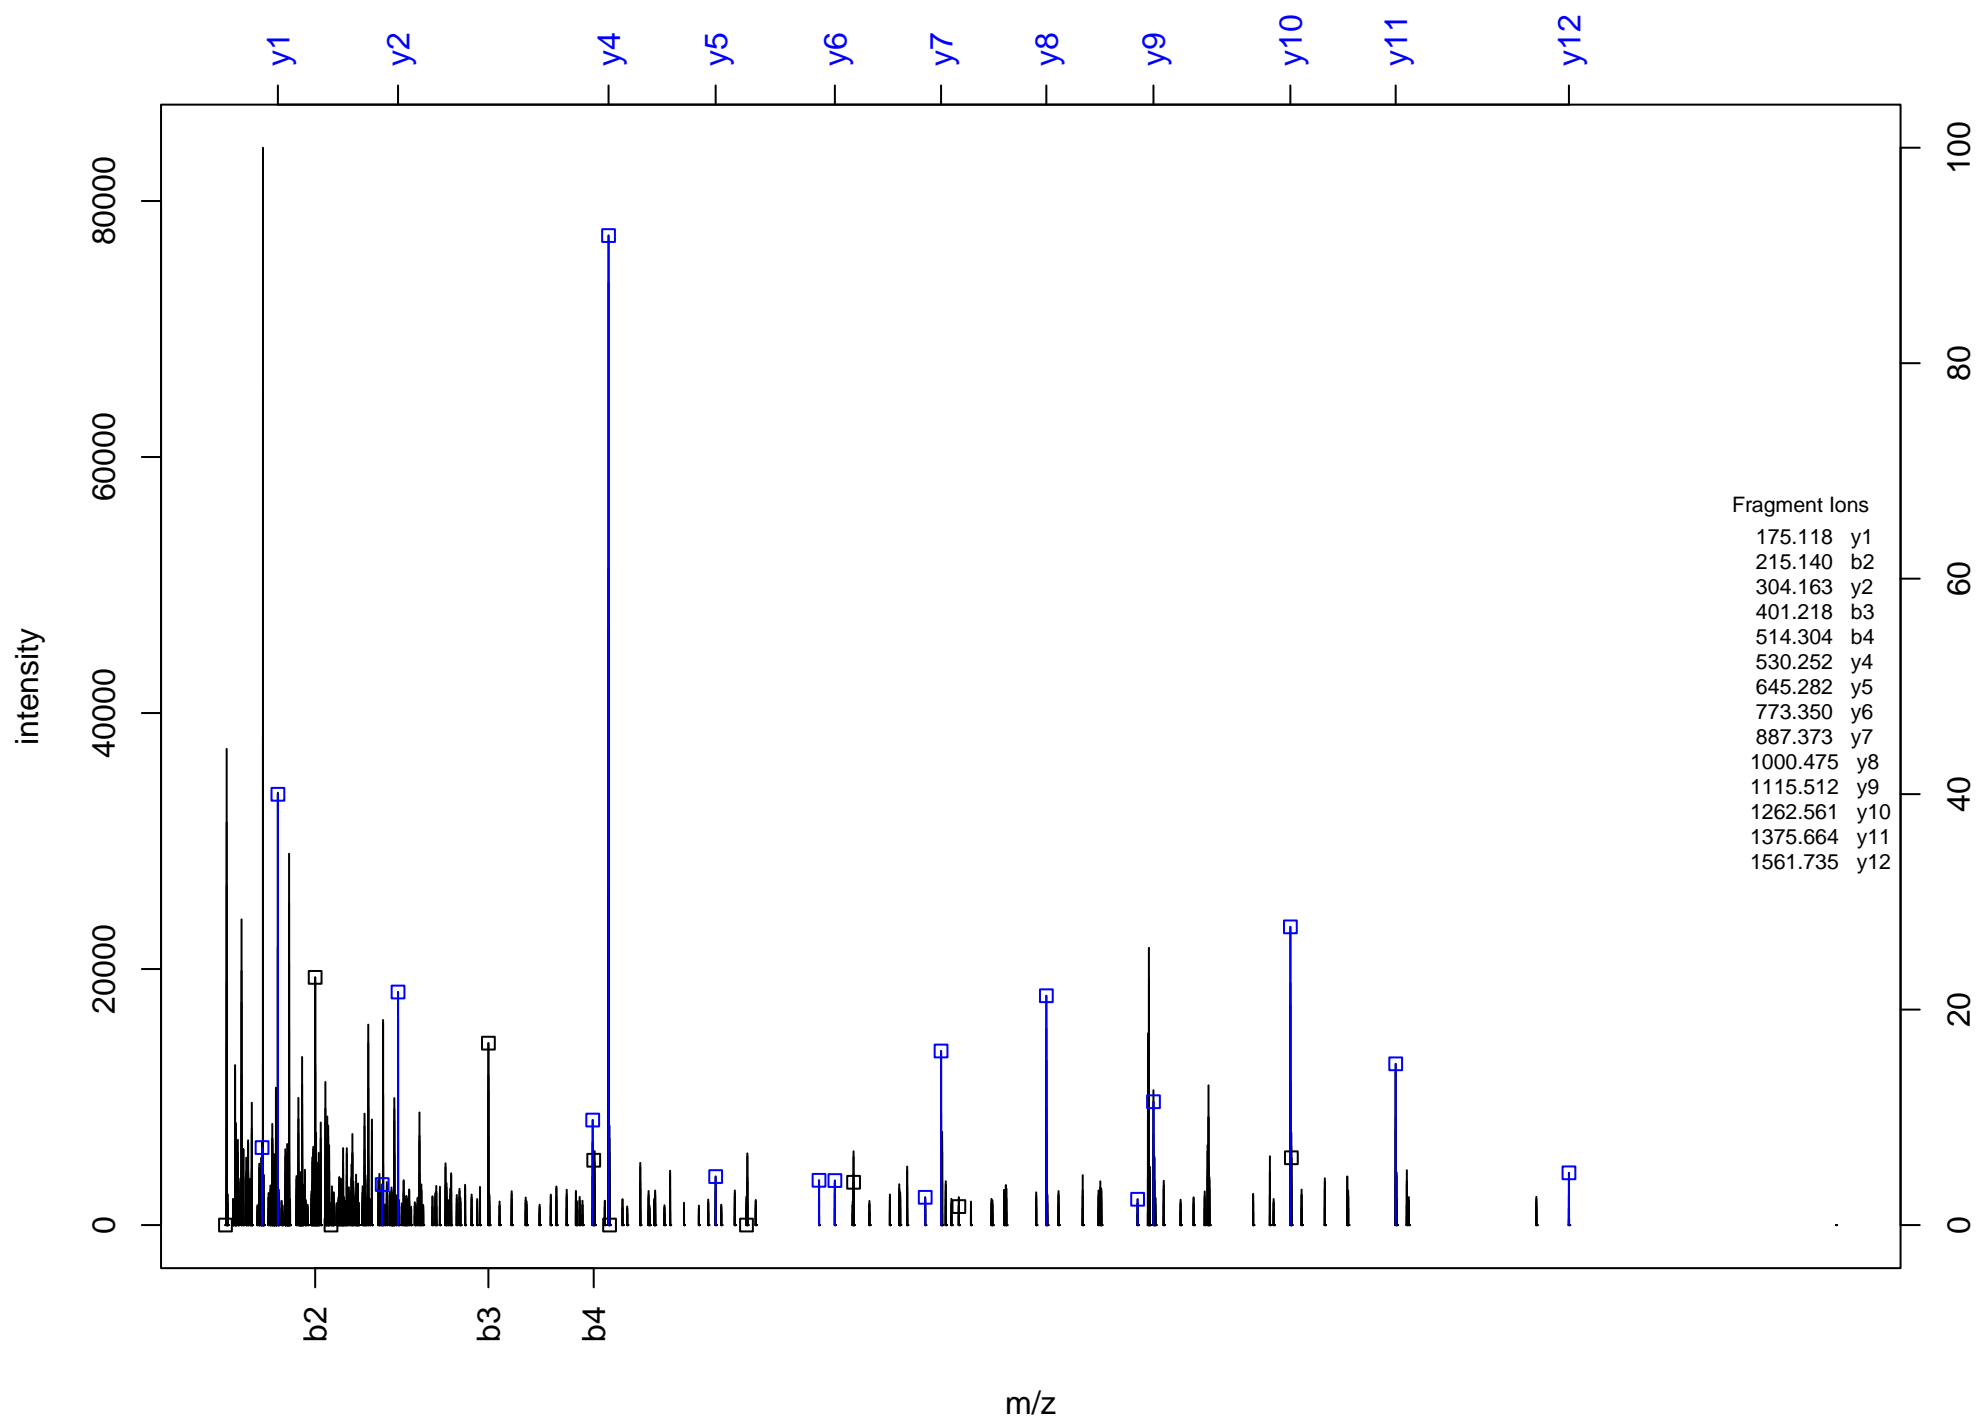

# KELIEDLTSM\*Q^M\*QKR

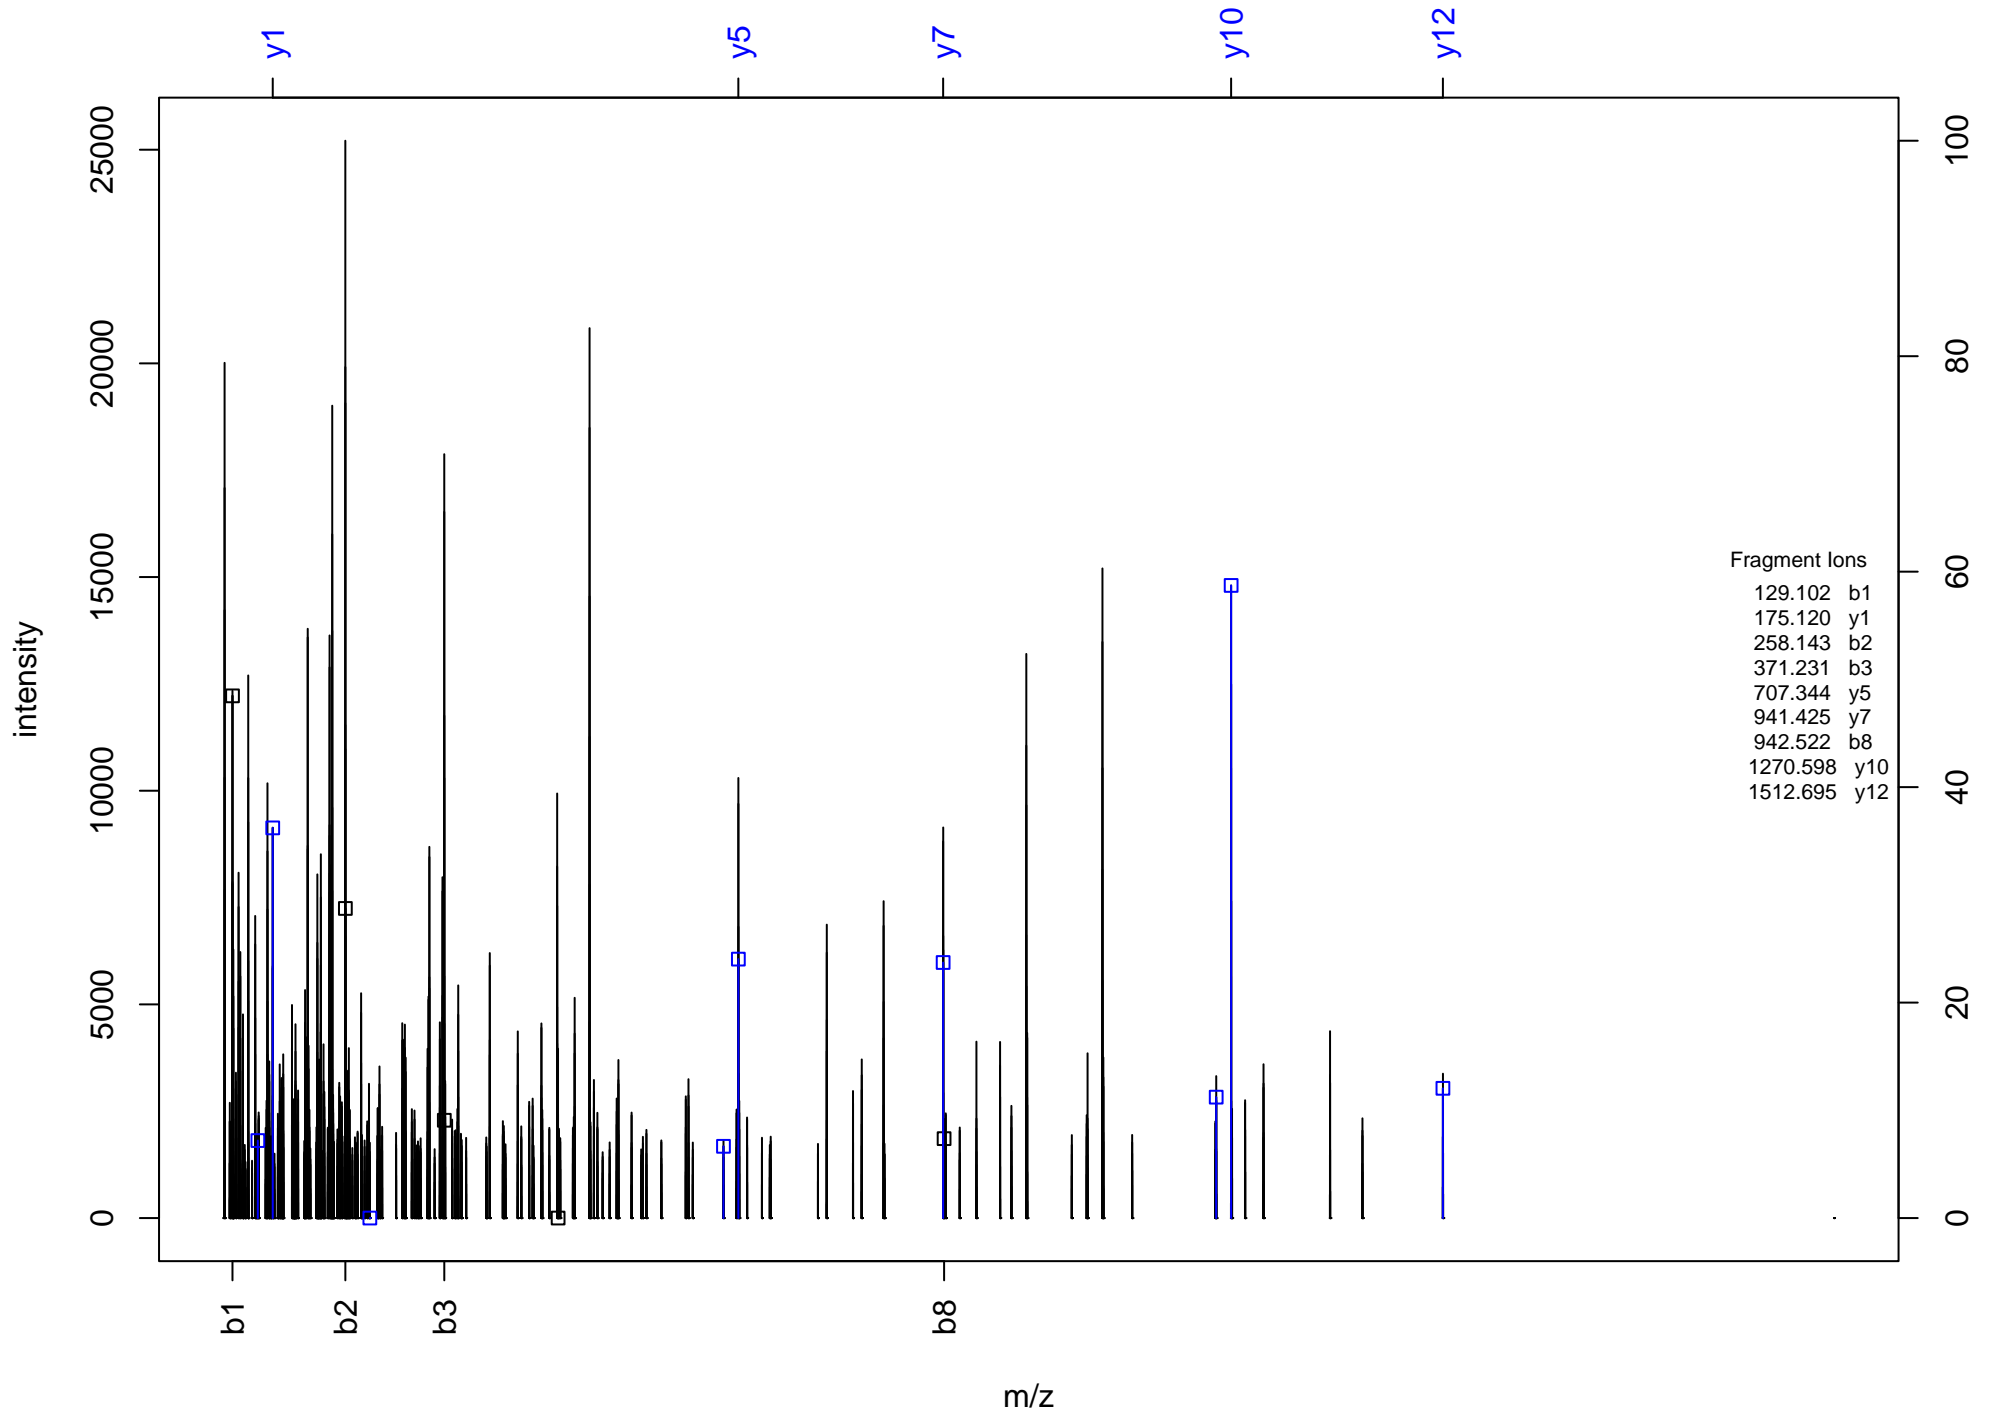

# DLLEDEADYVVPVEDNDENYIHPR

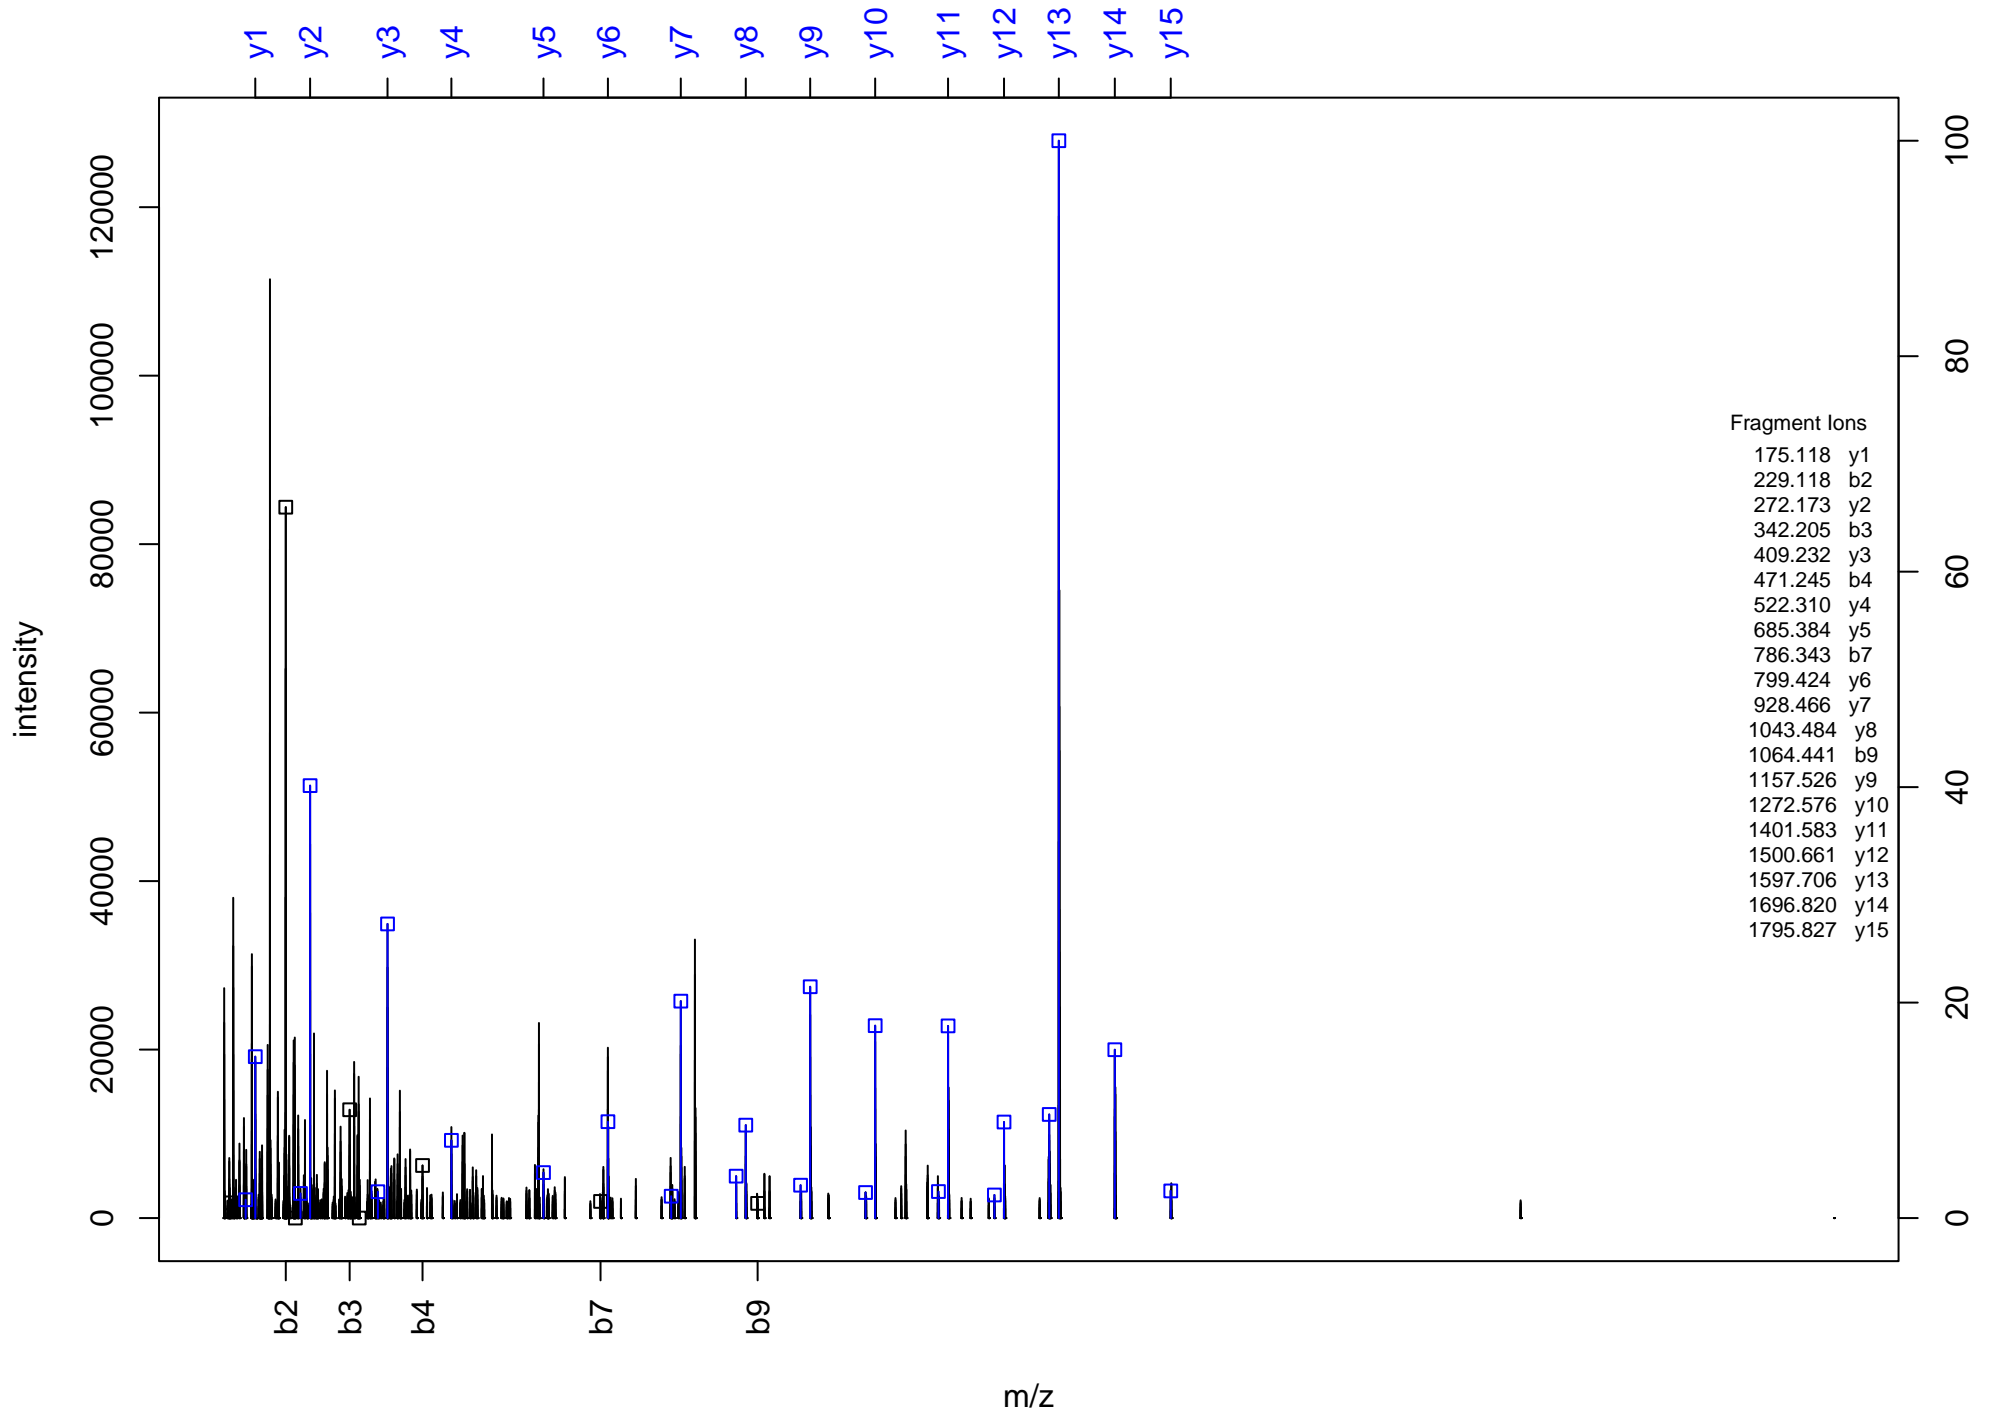

# SGPLFNFDVHDDVR

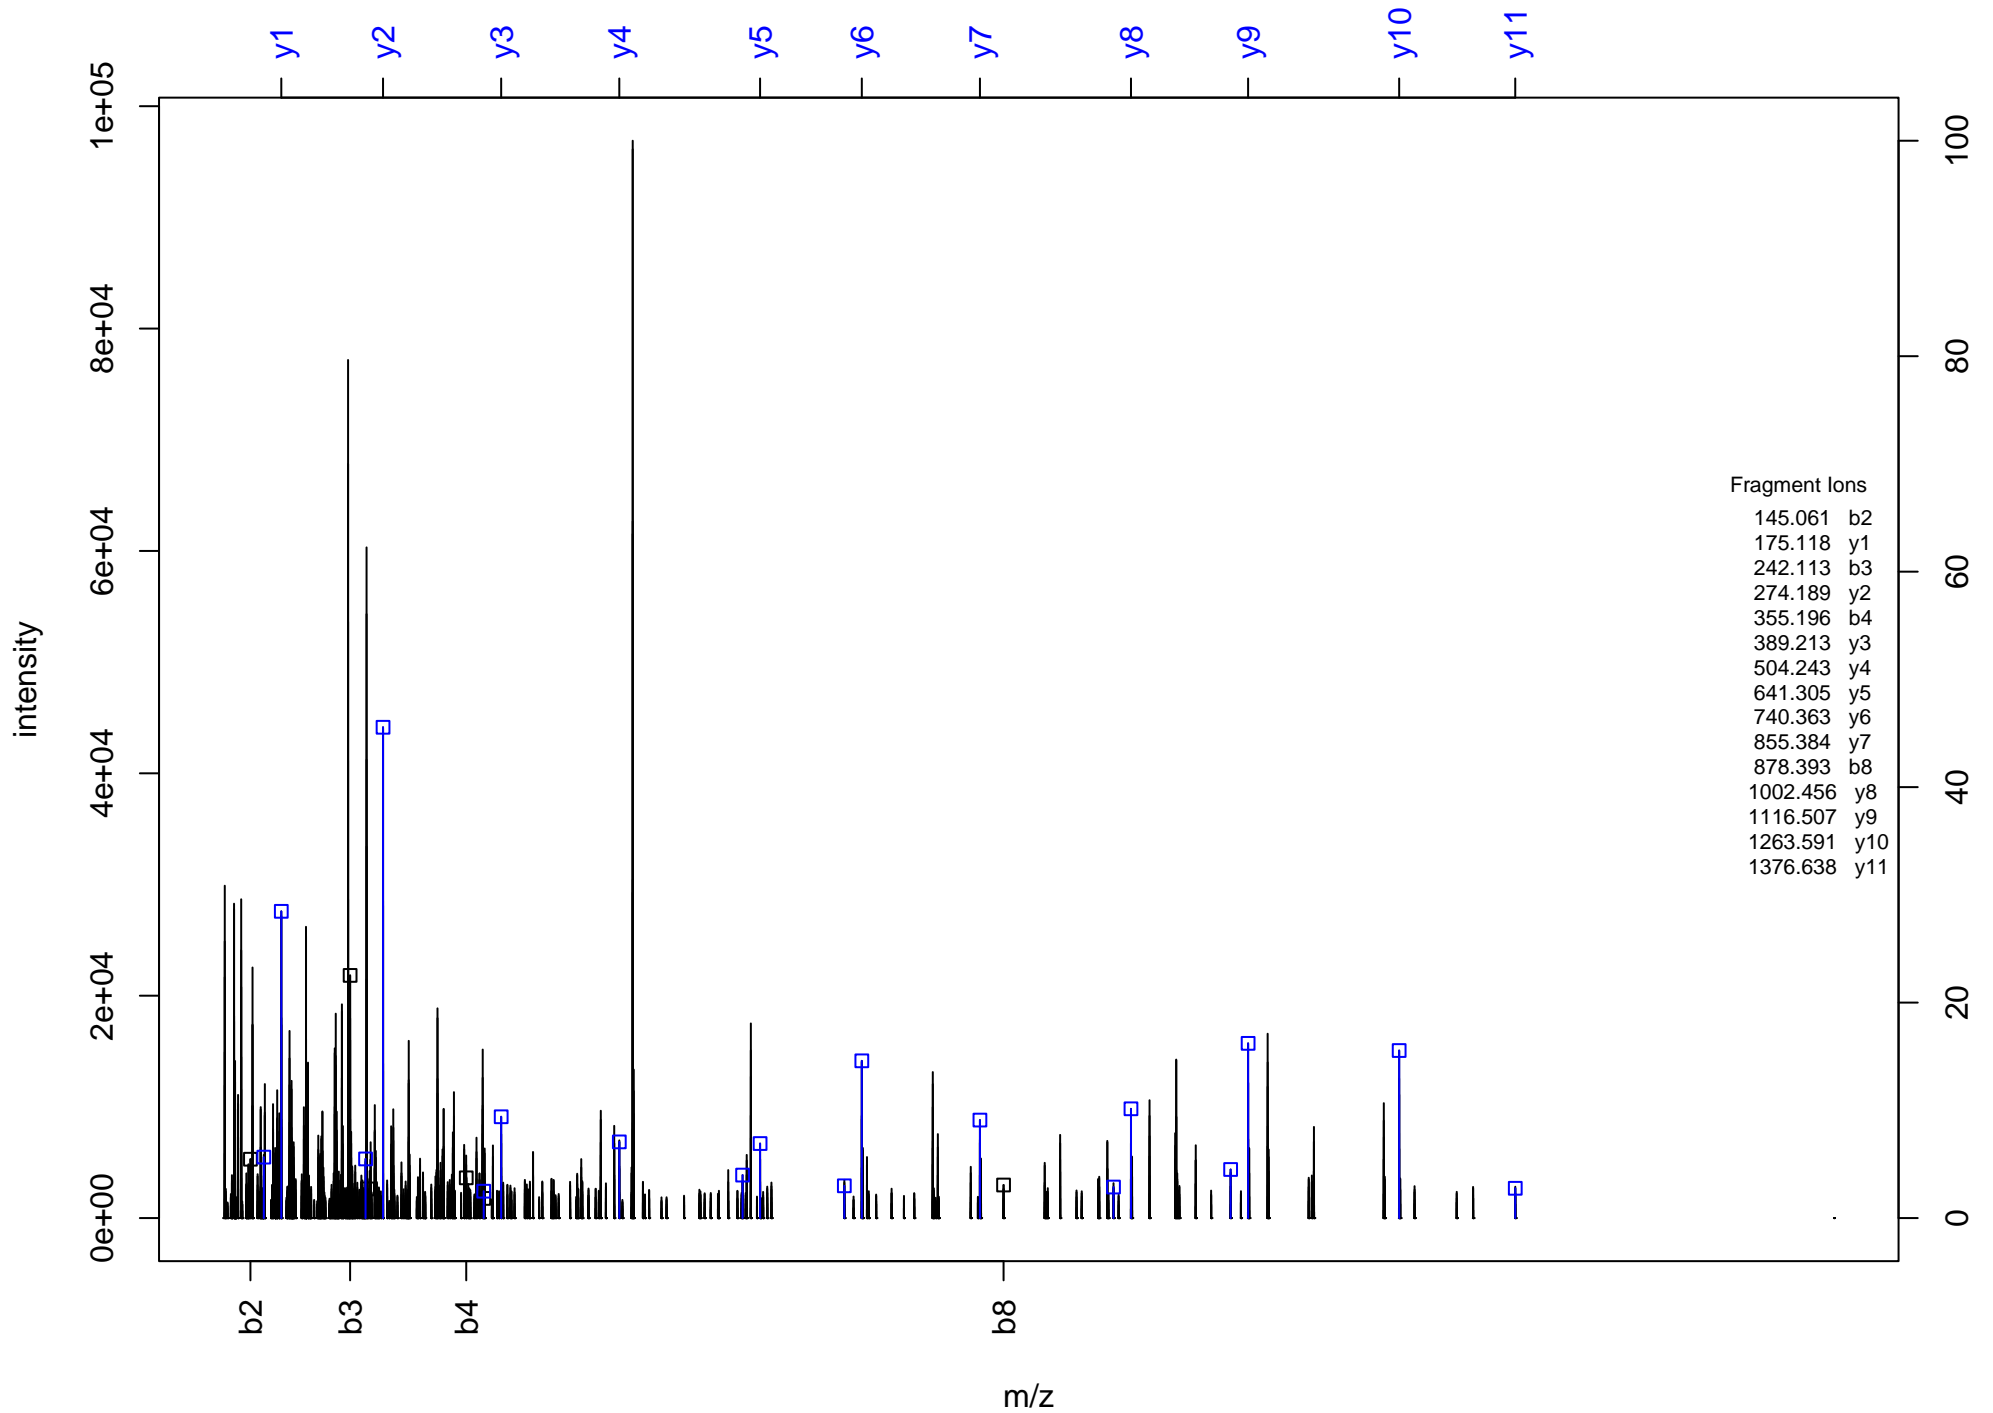

# SDAPTGDVLLDEALK

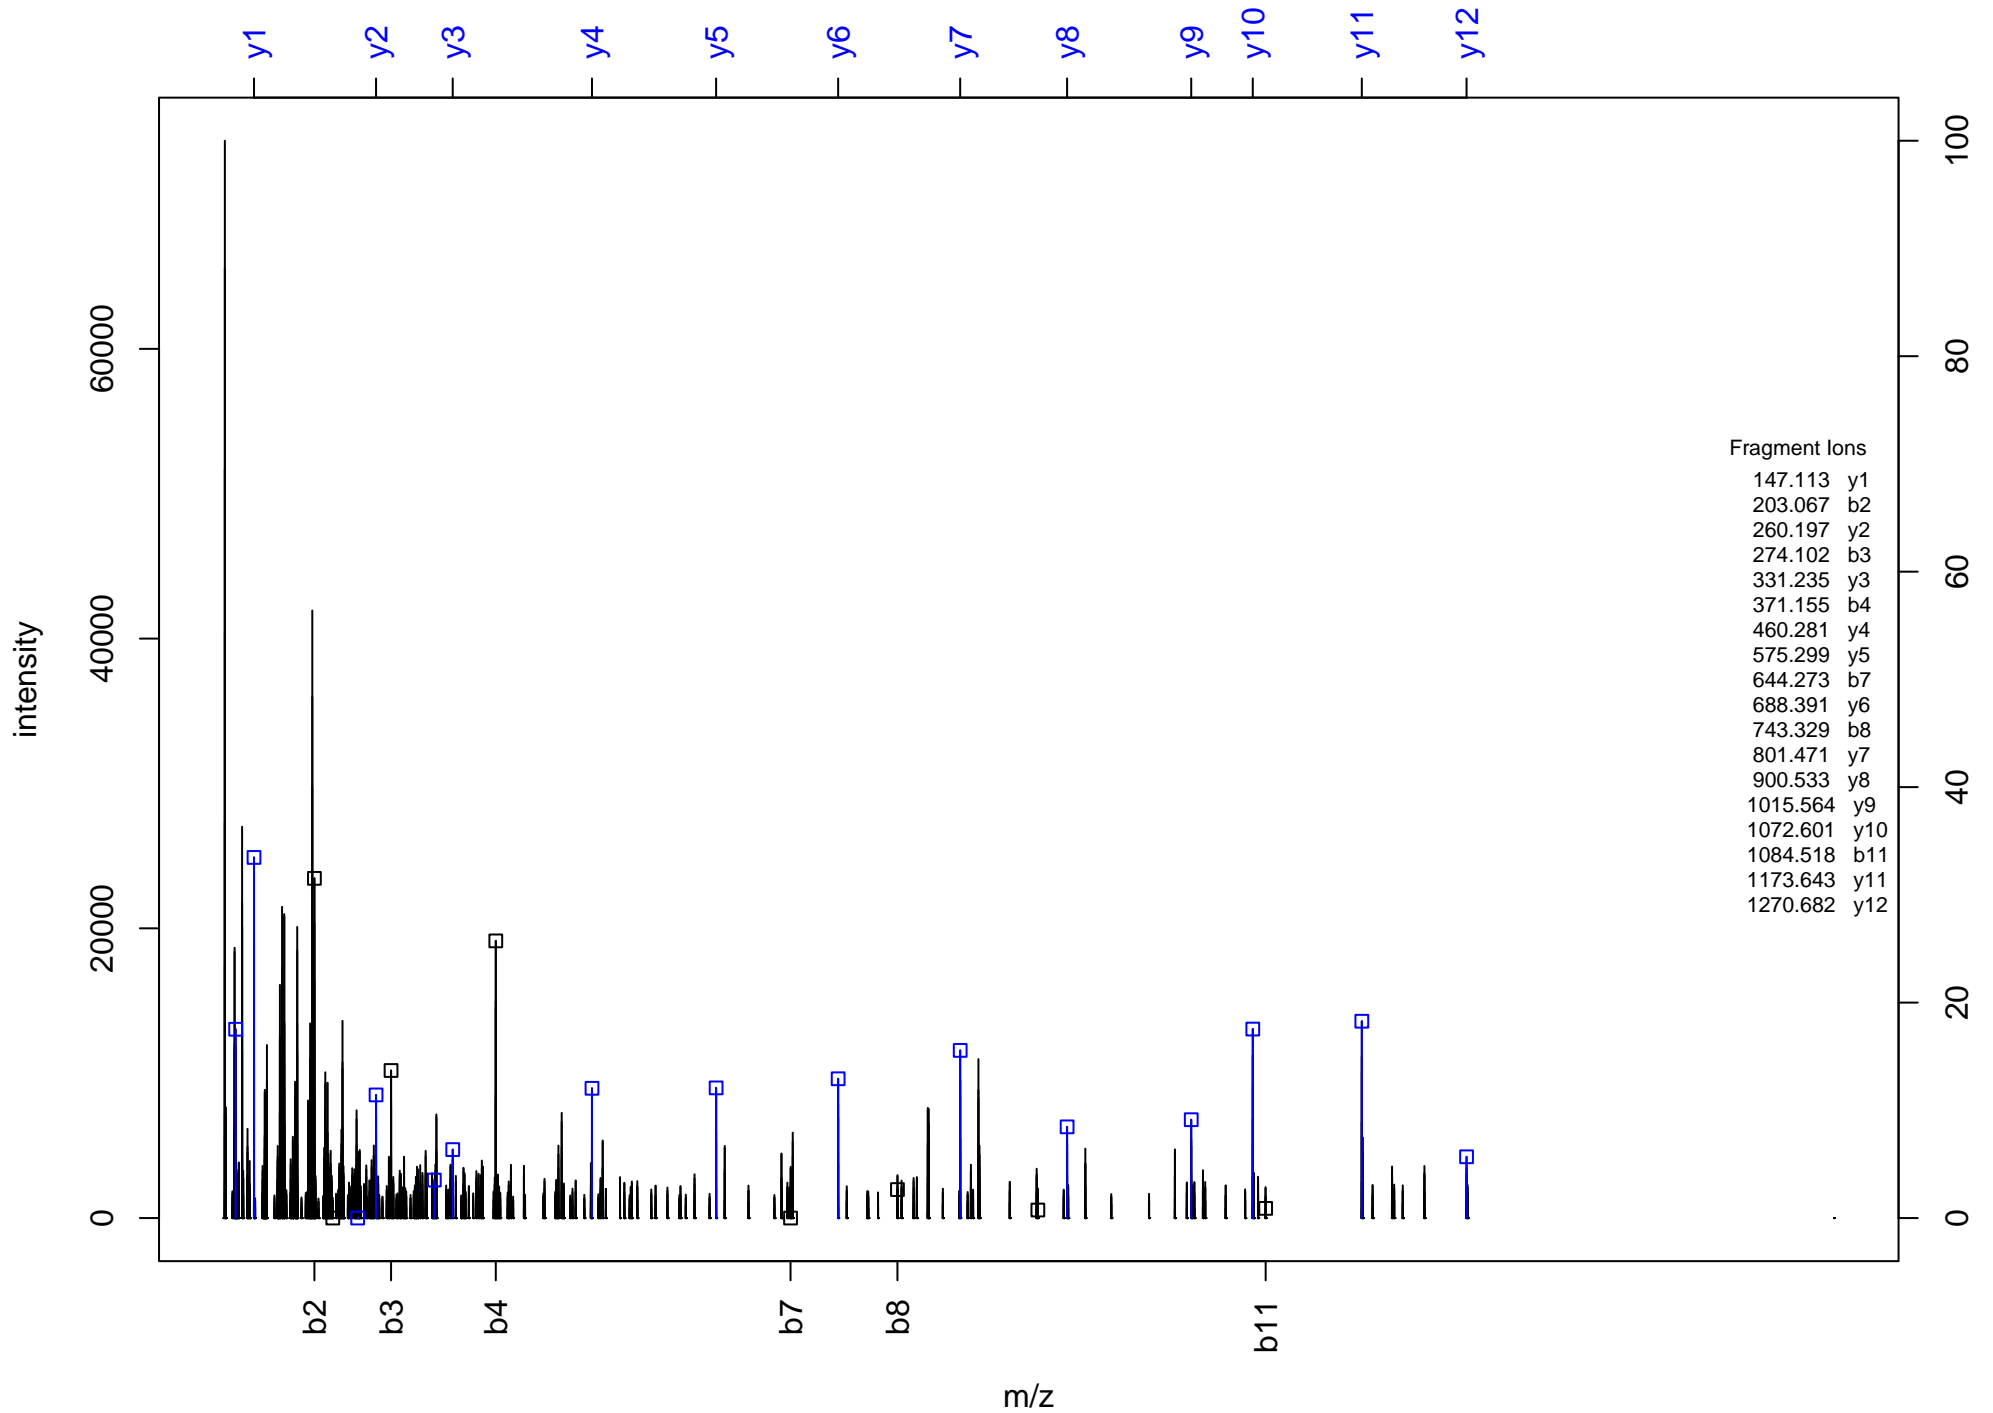

# DGLIIN<sup>A</sup>Q<sup>A</sup>IETKPR

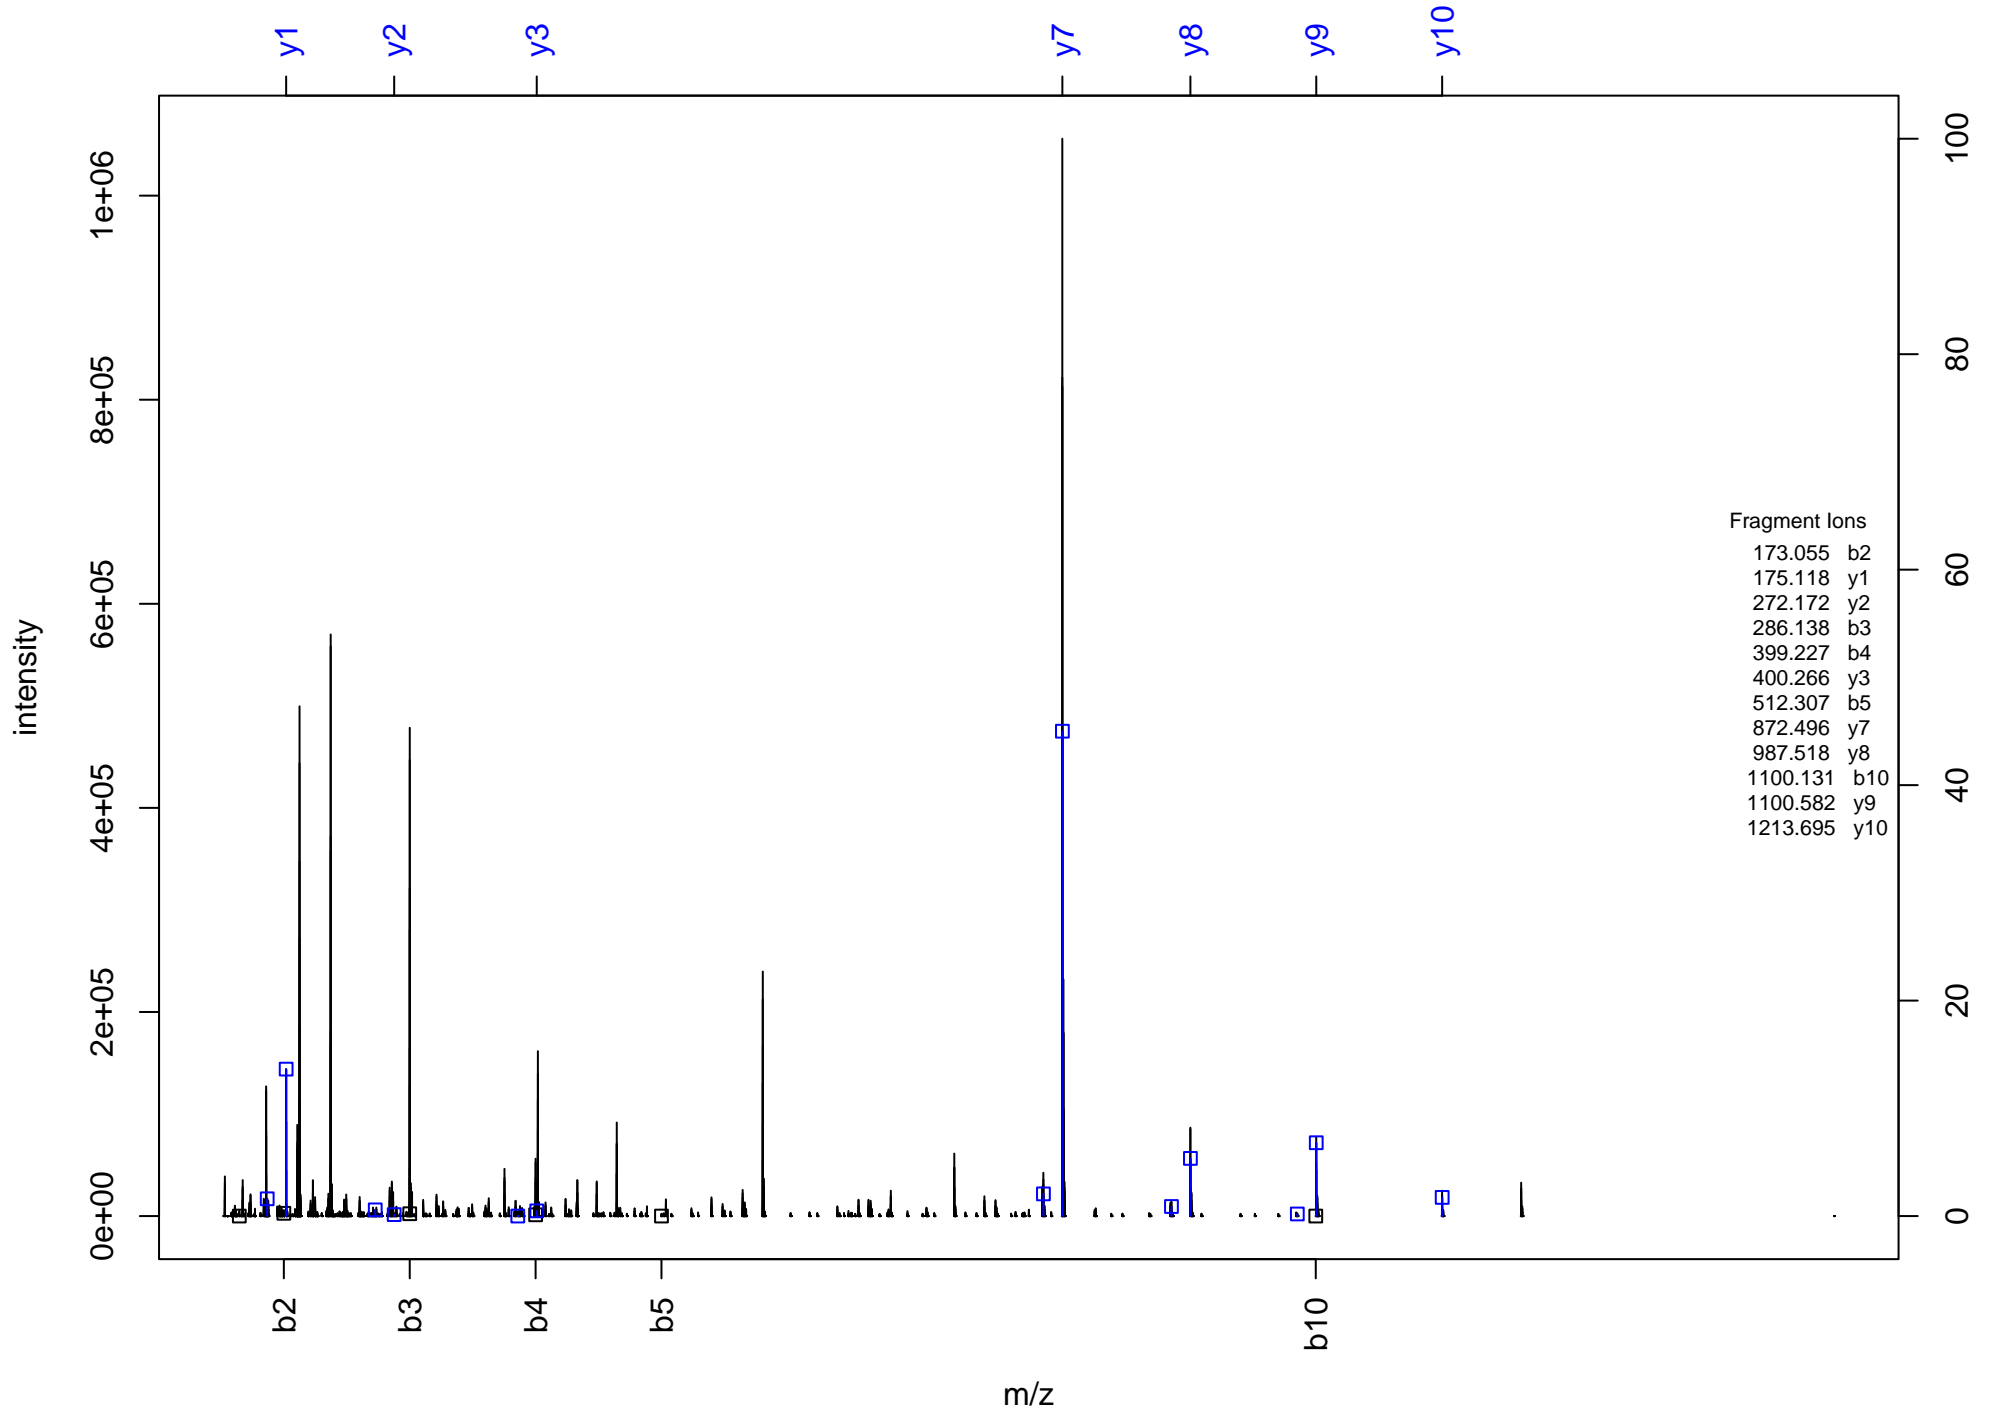



# FVTSM\*CGRIVN^V

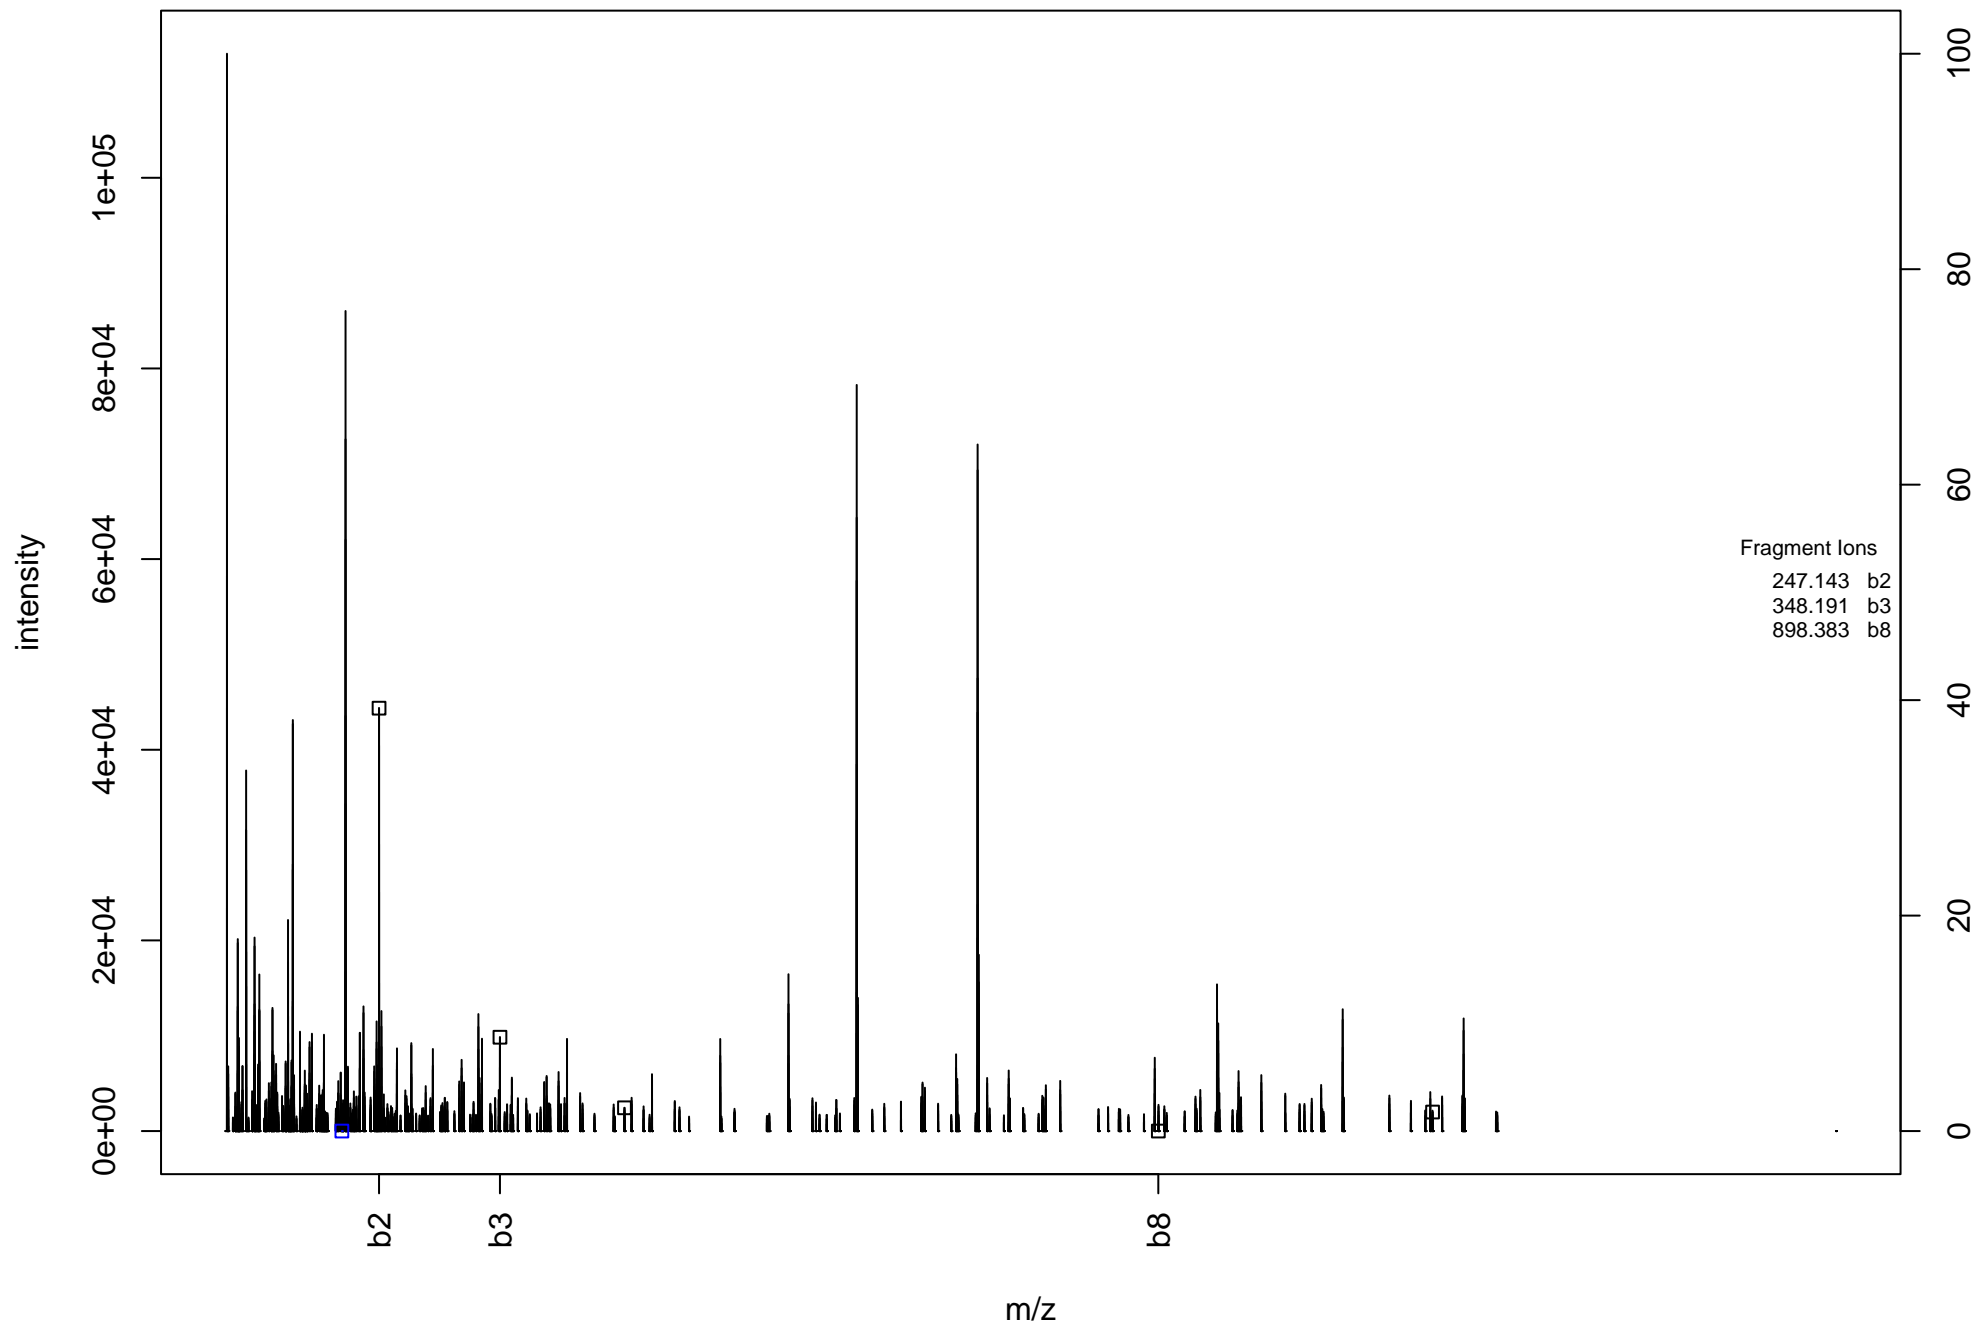

# KPSEGEEEAASAGGPQVNPMPVTDEVV

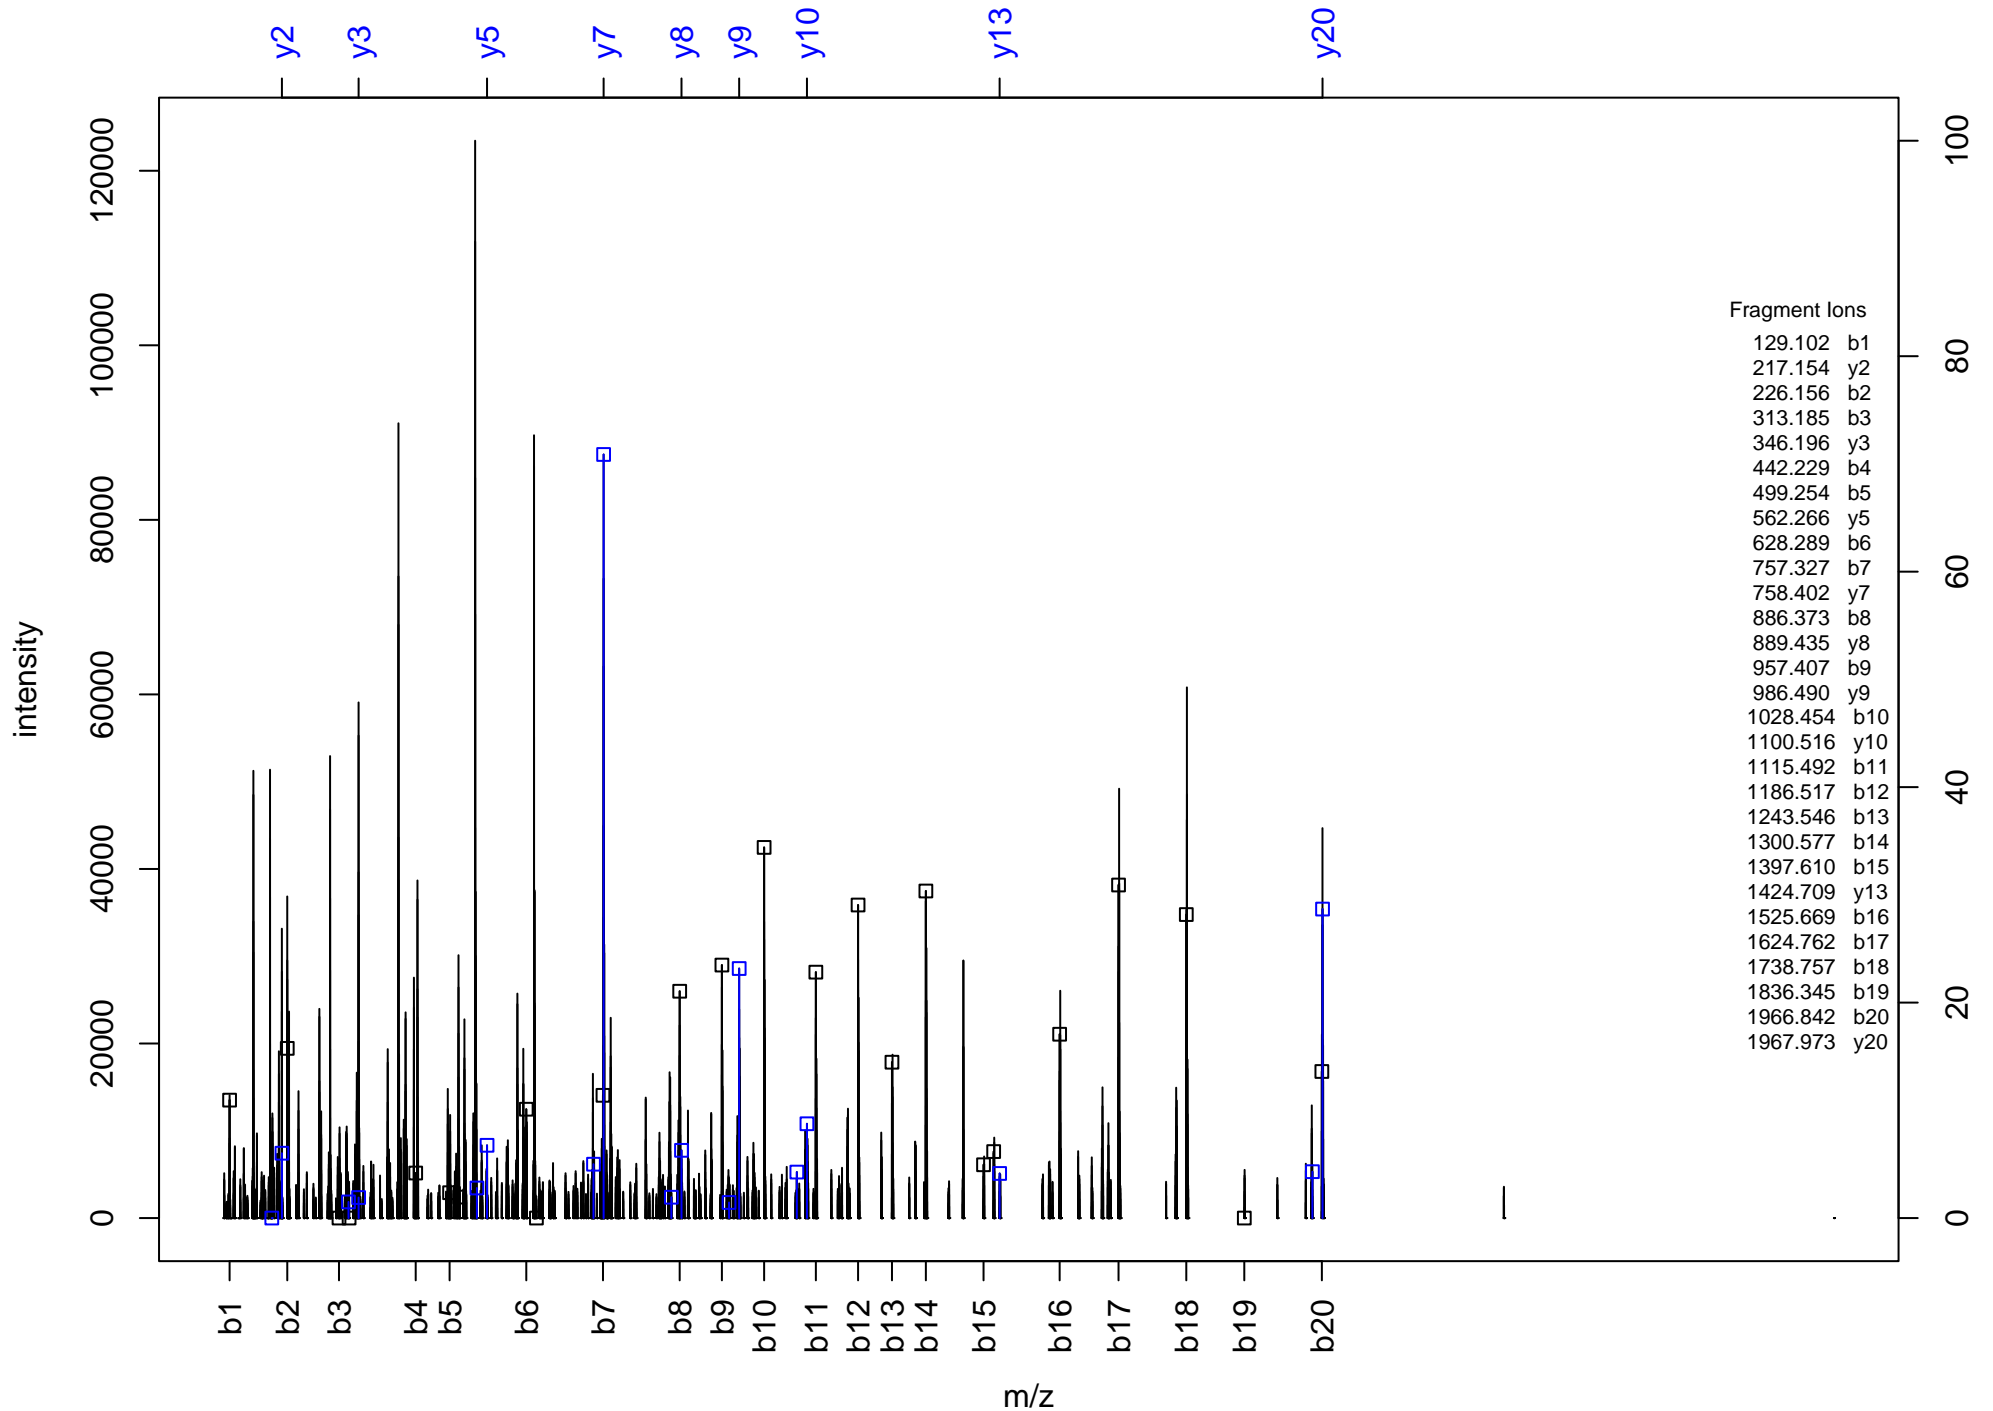

# DTLWGLFNNLQR

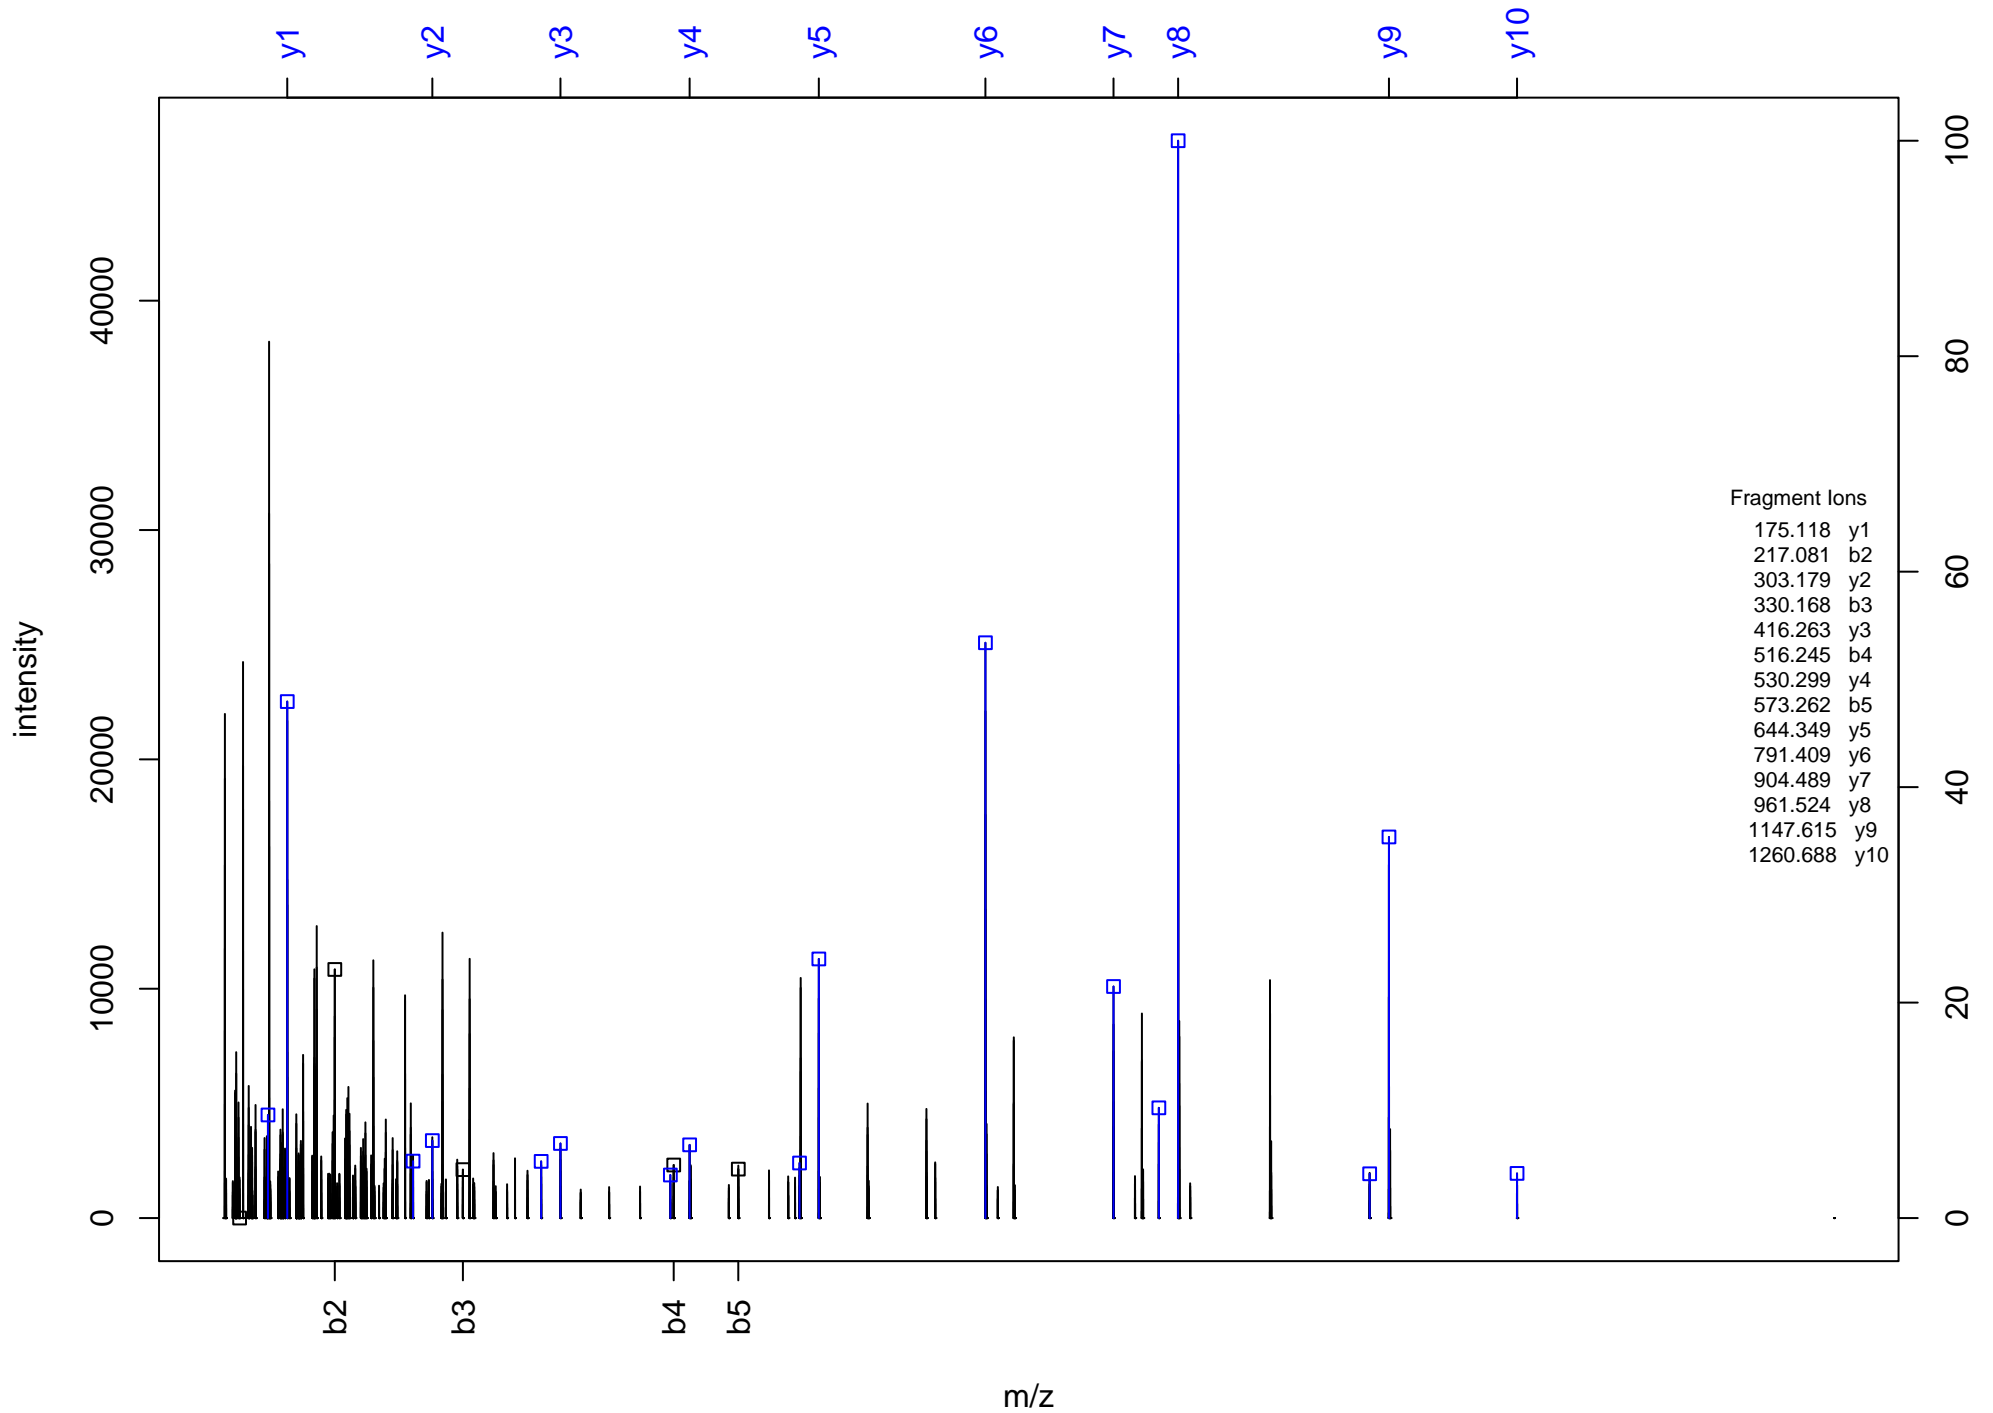

# DIKN^AFREIM\*R

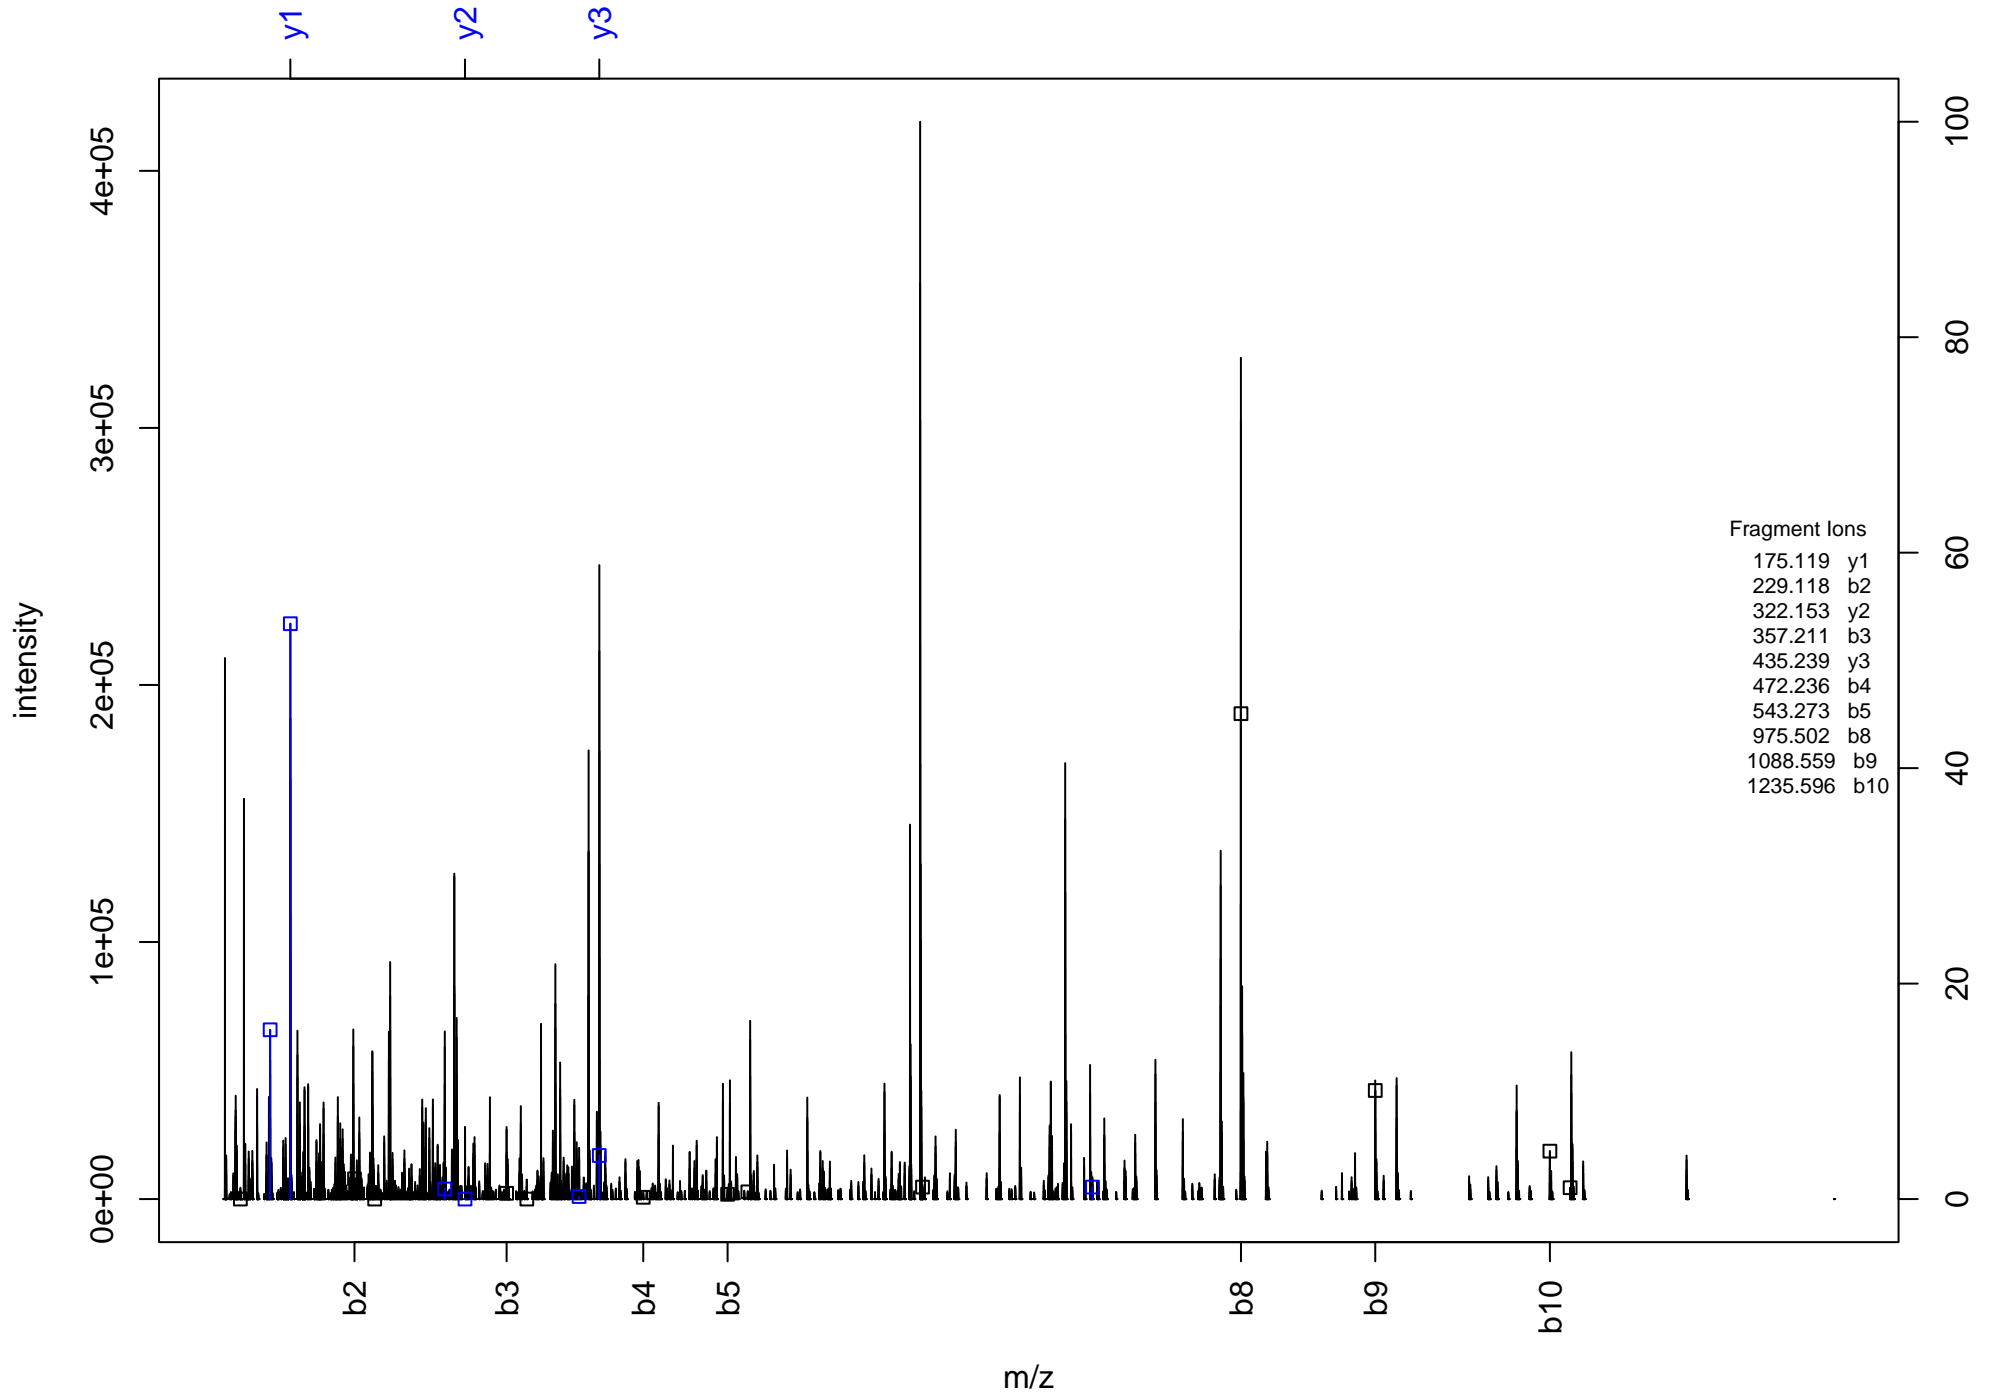

# QQSEEDLLLQDFSR

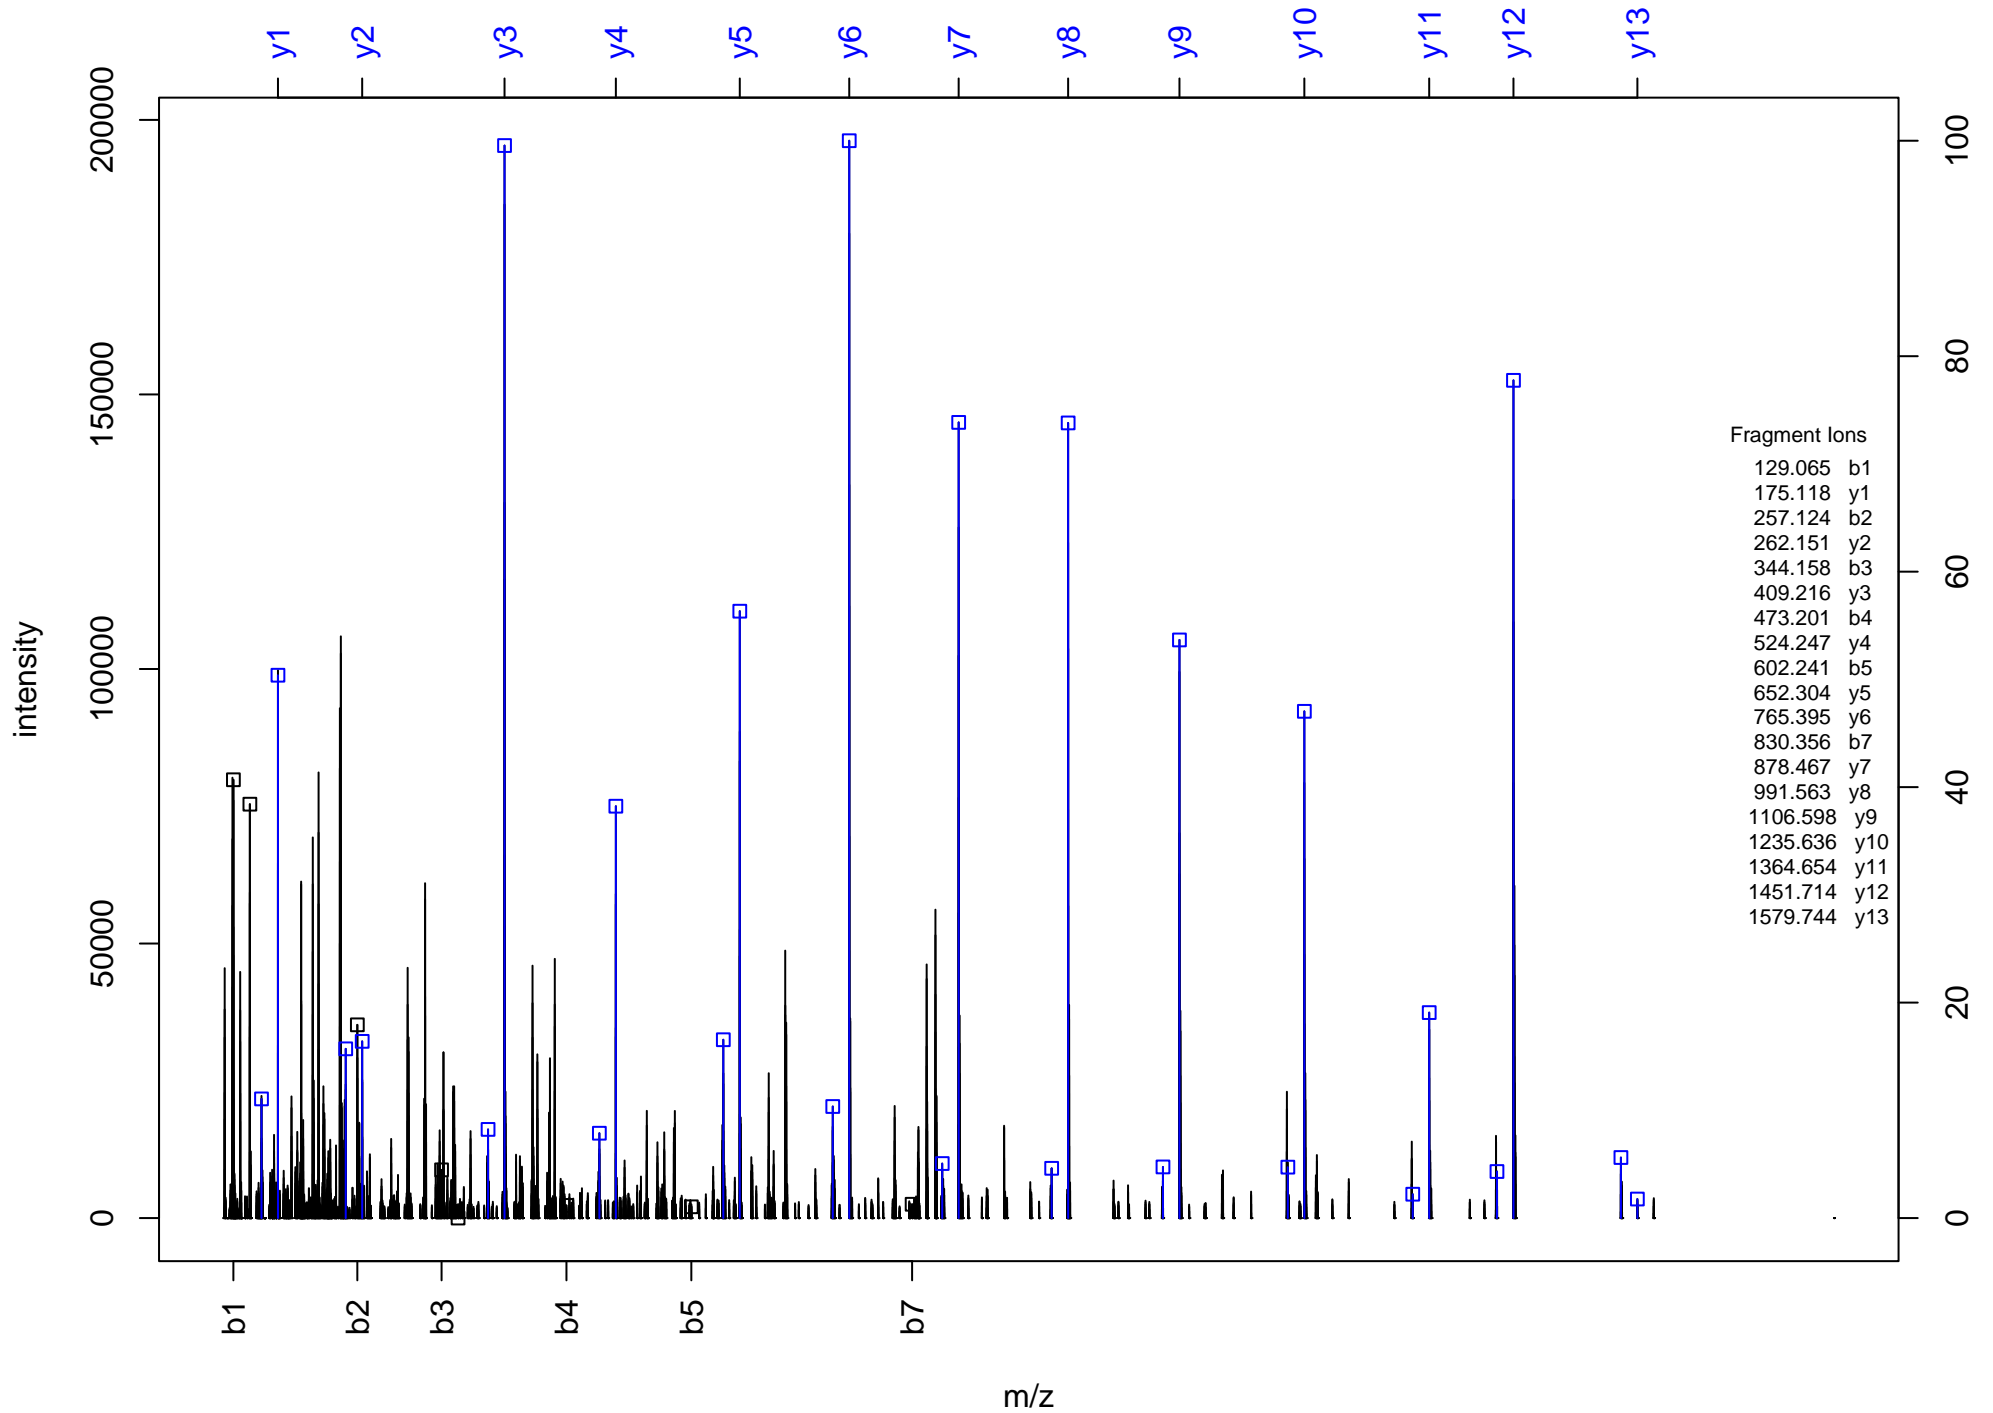

# QLLLQ<sup>+</sup>LN<sup>+</sup>Q<sup>+</sup>Q<sup>+</sup>R

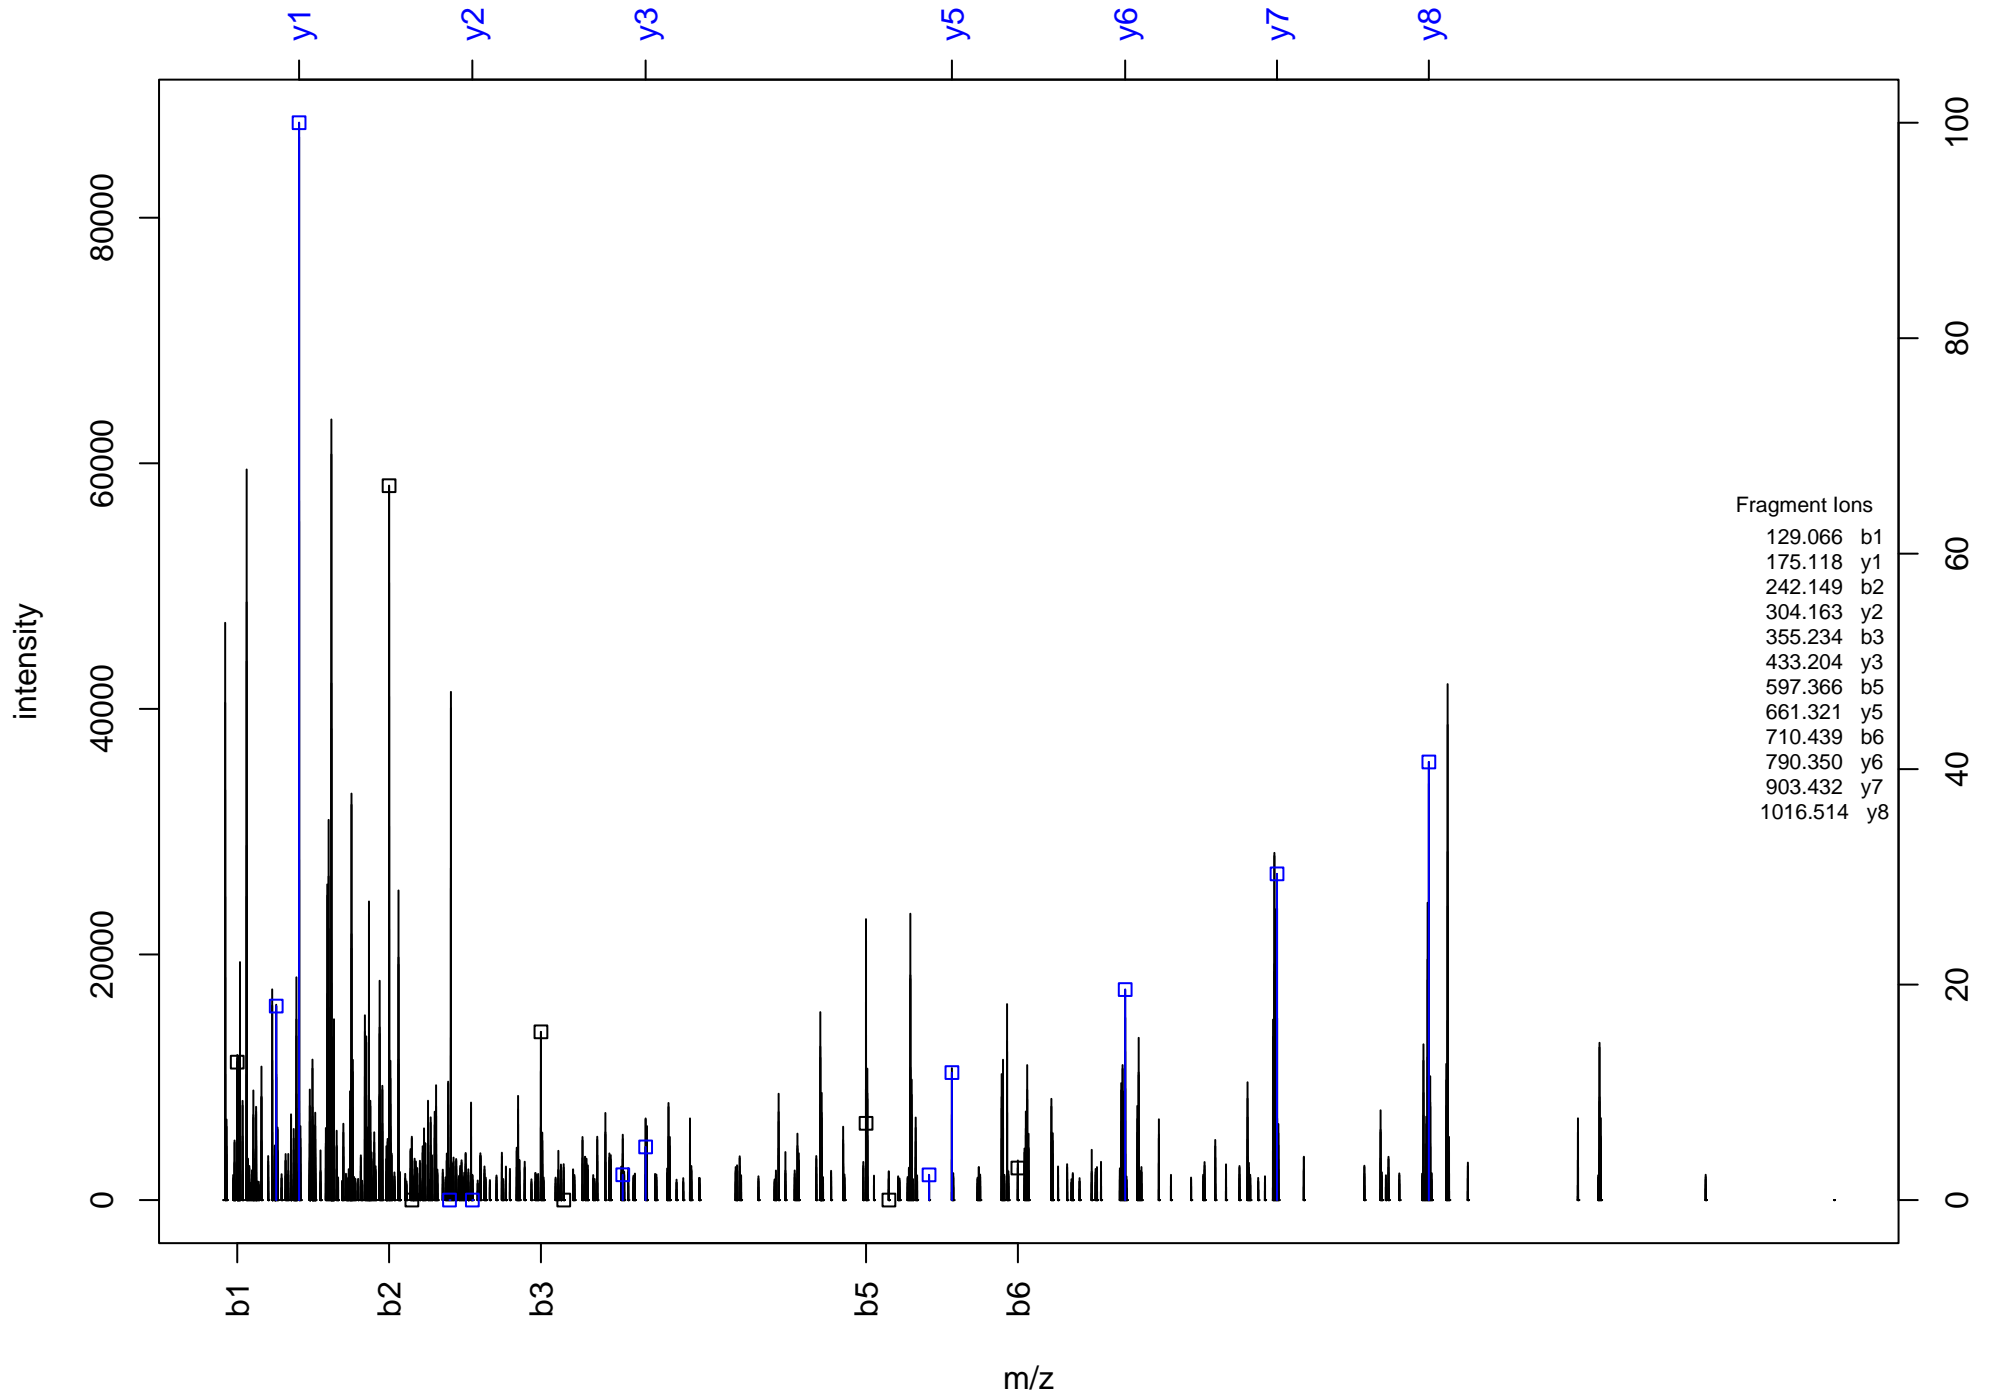

# (Ac)AAETLNFGPEWLR

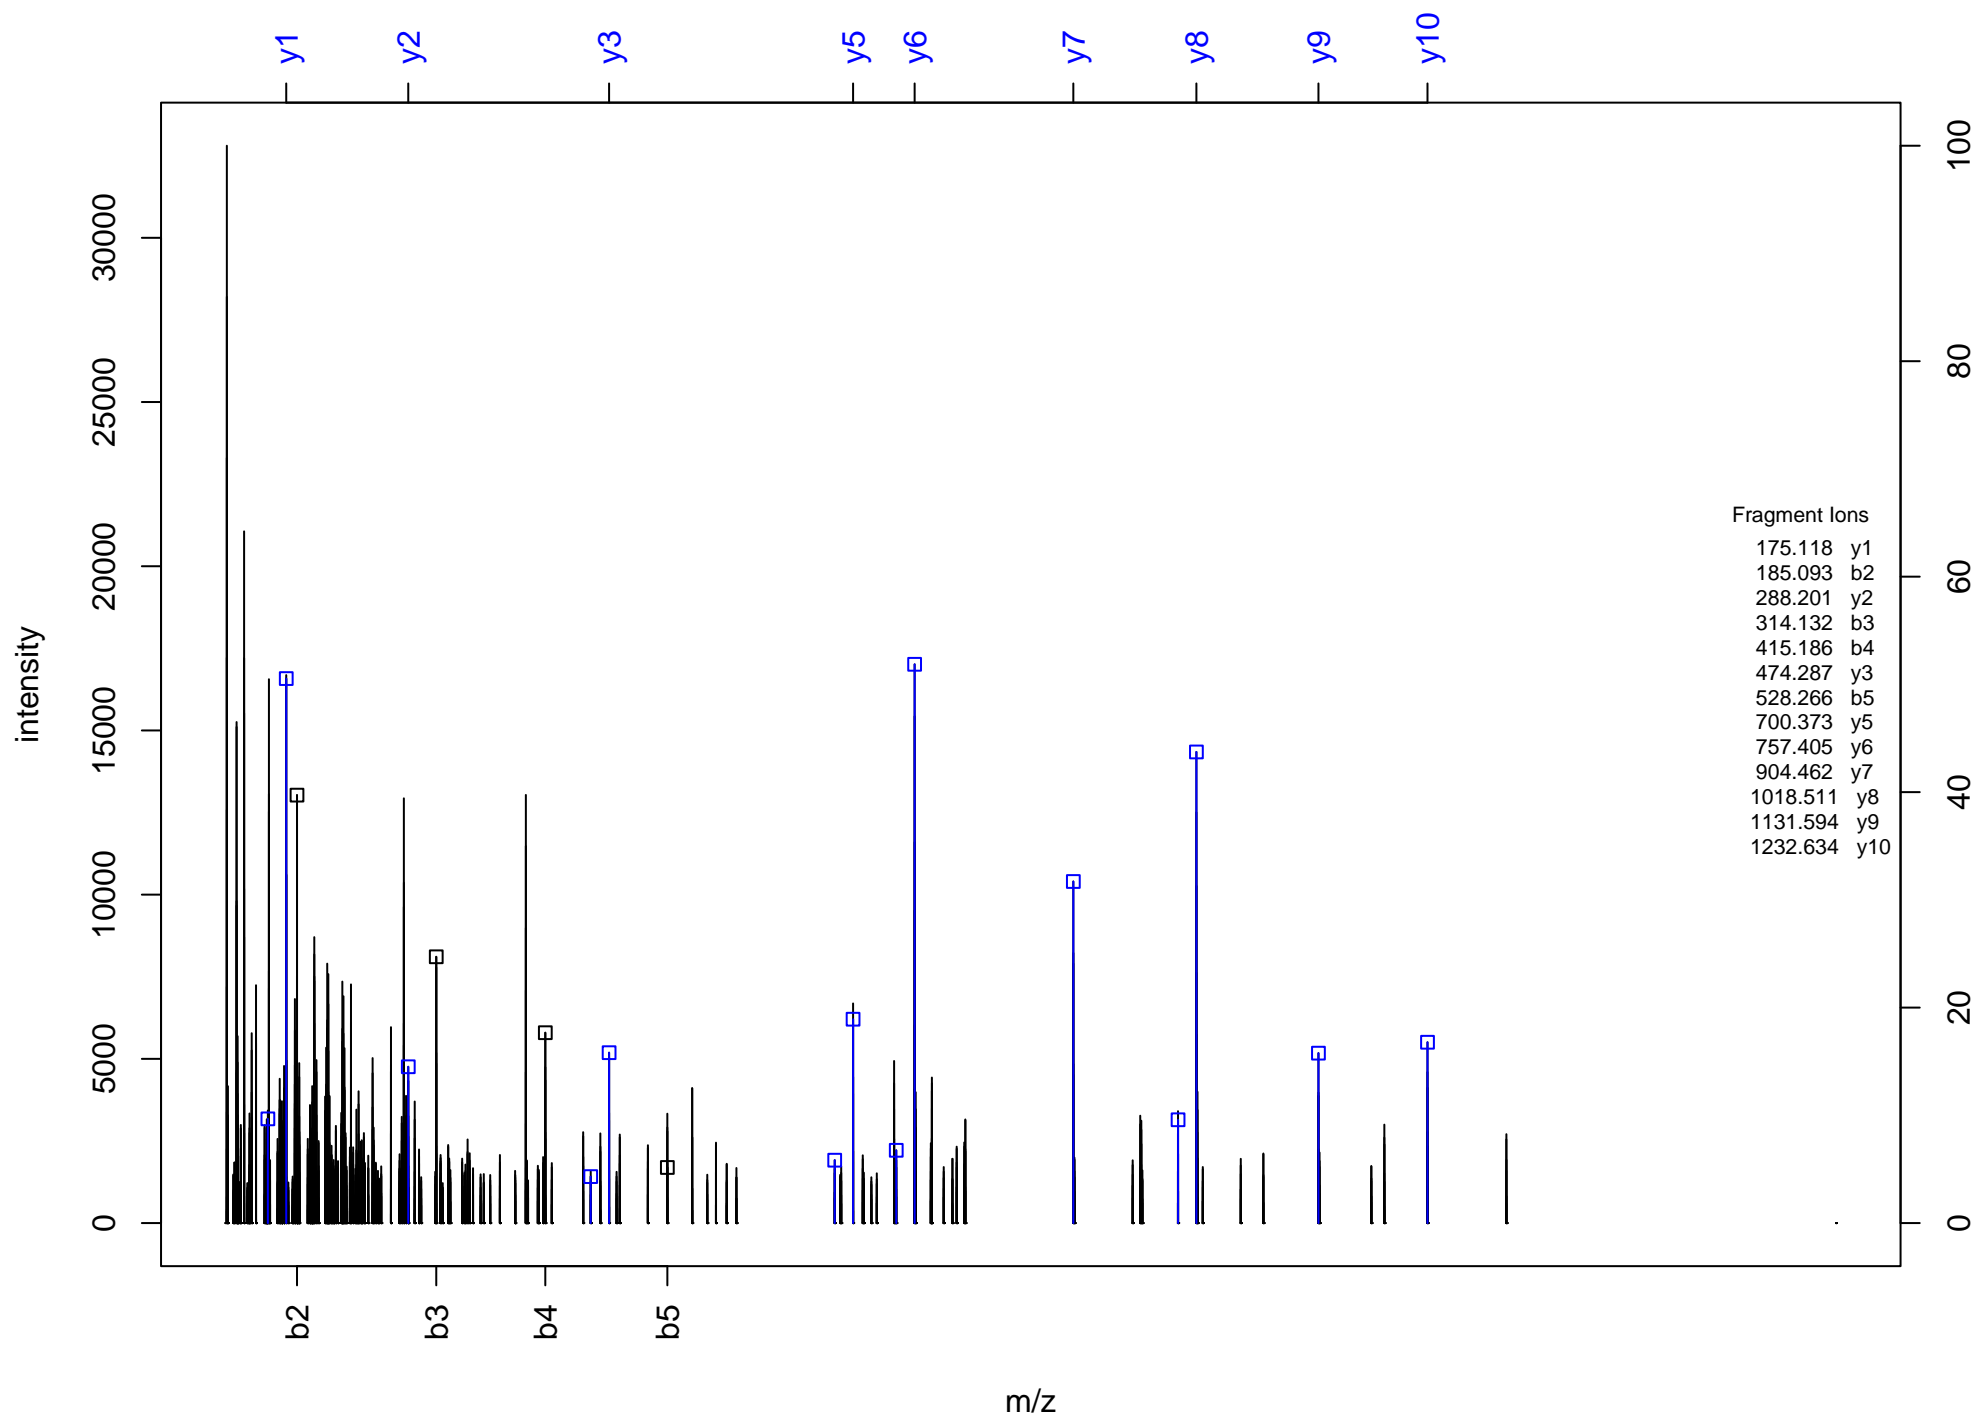

# LAALFSTAEPSAPPVFVPVPQETSK

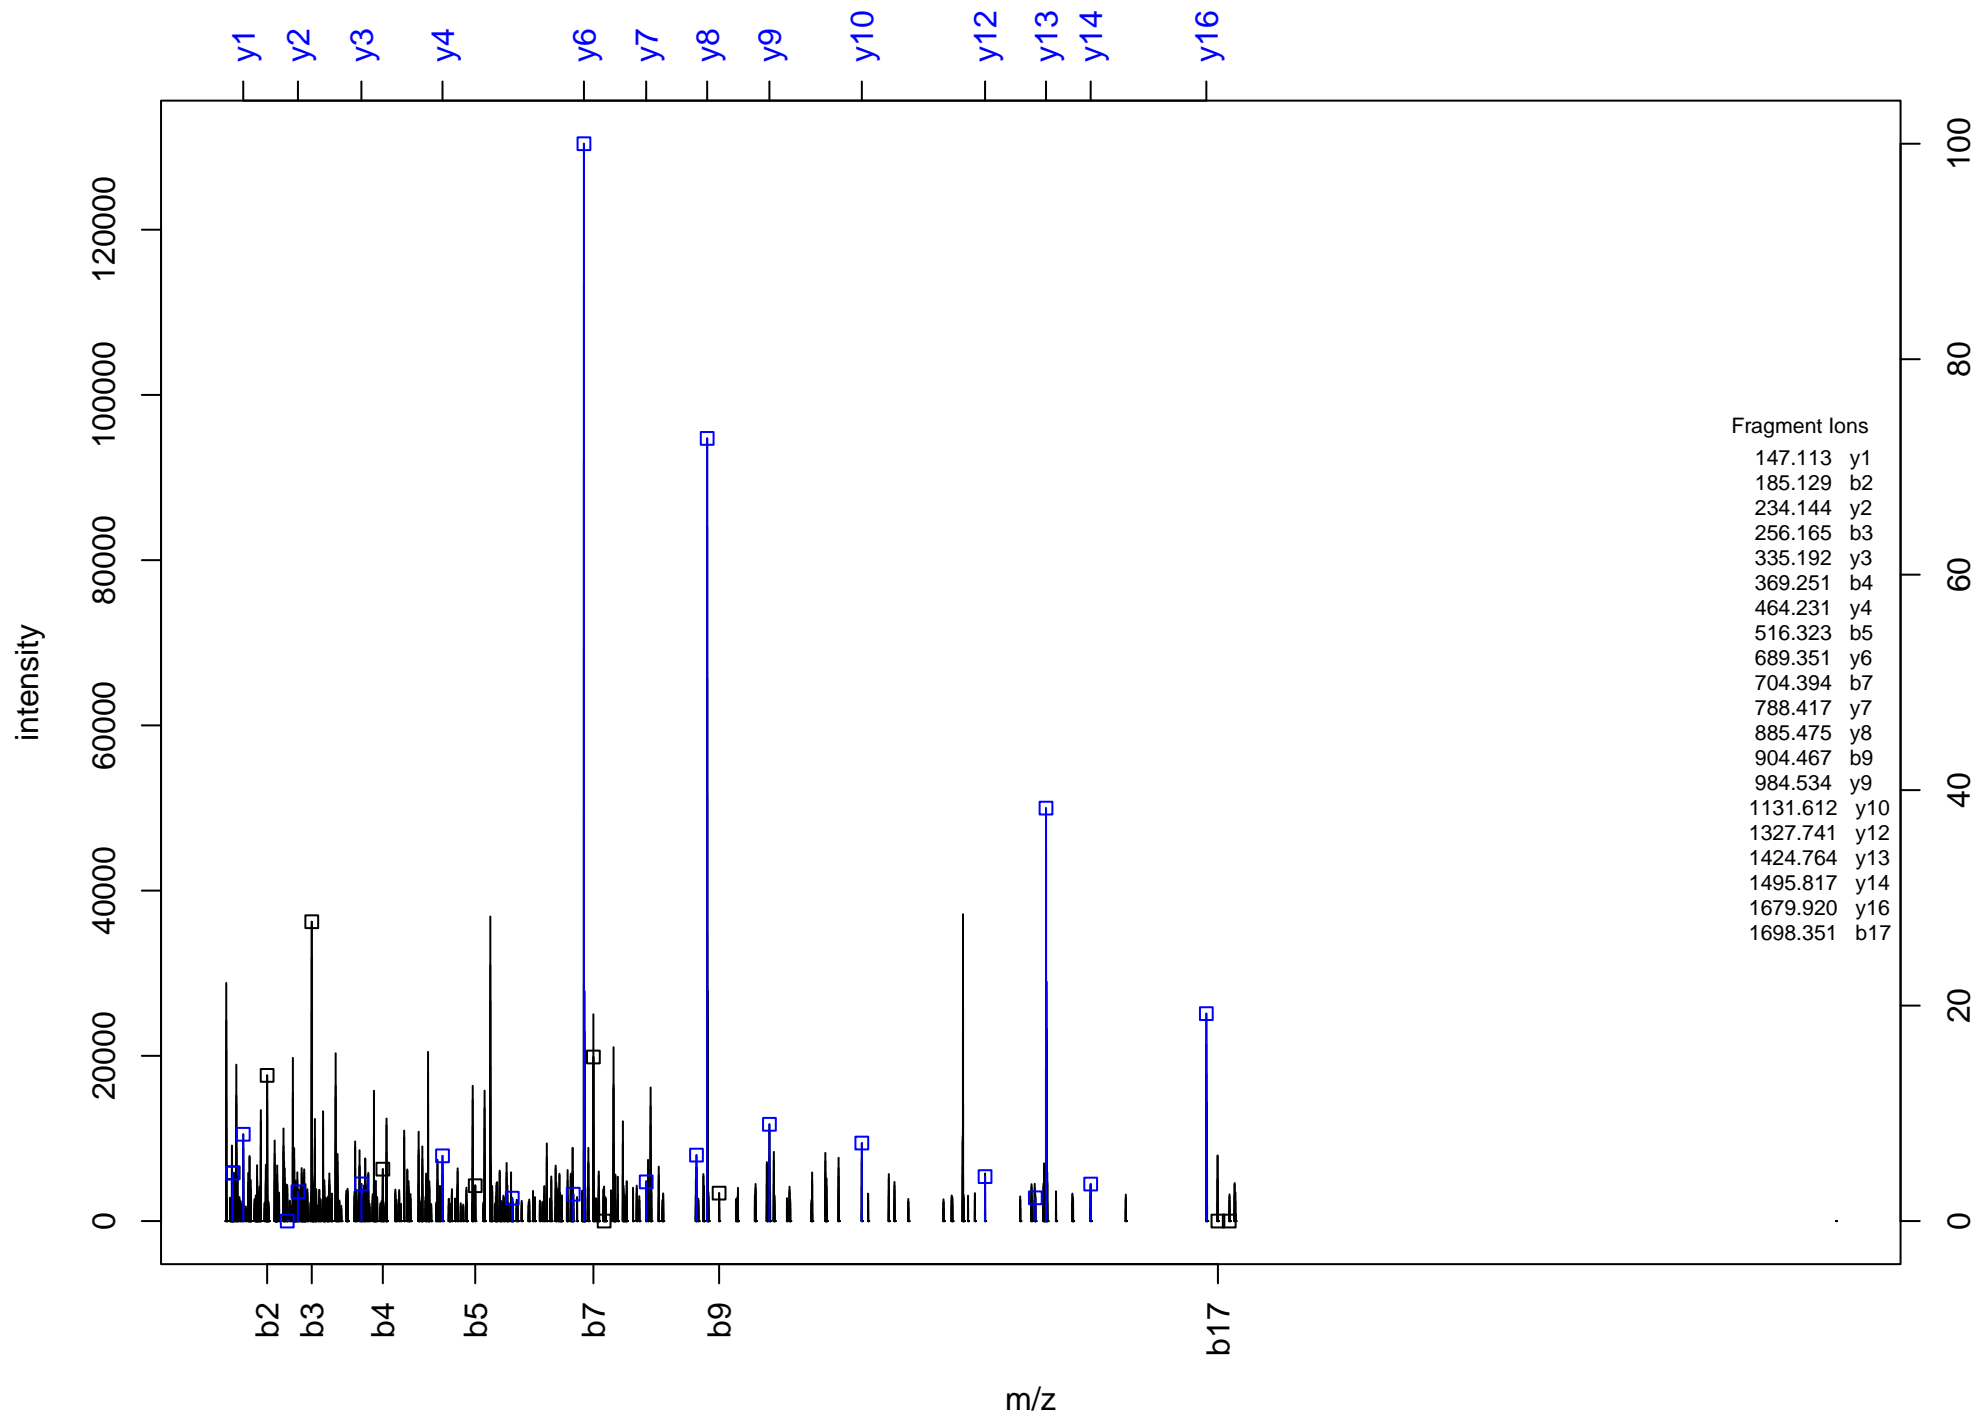



# DSPDLLLLLR

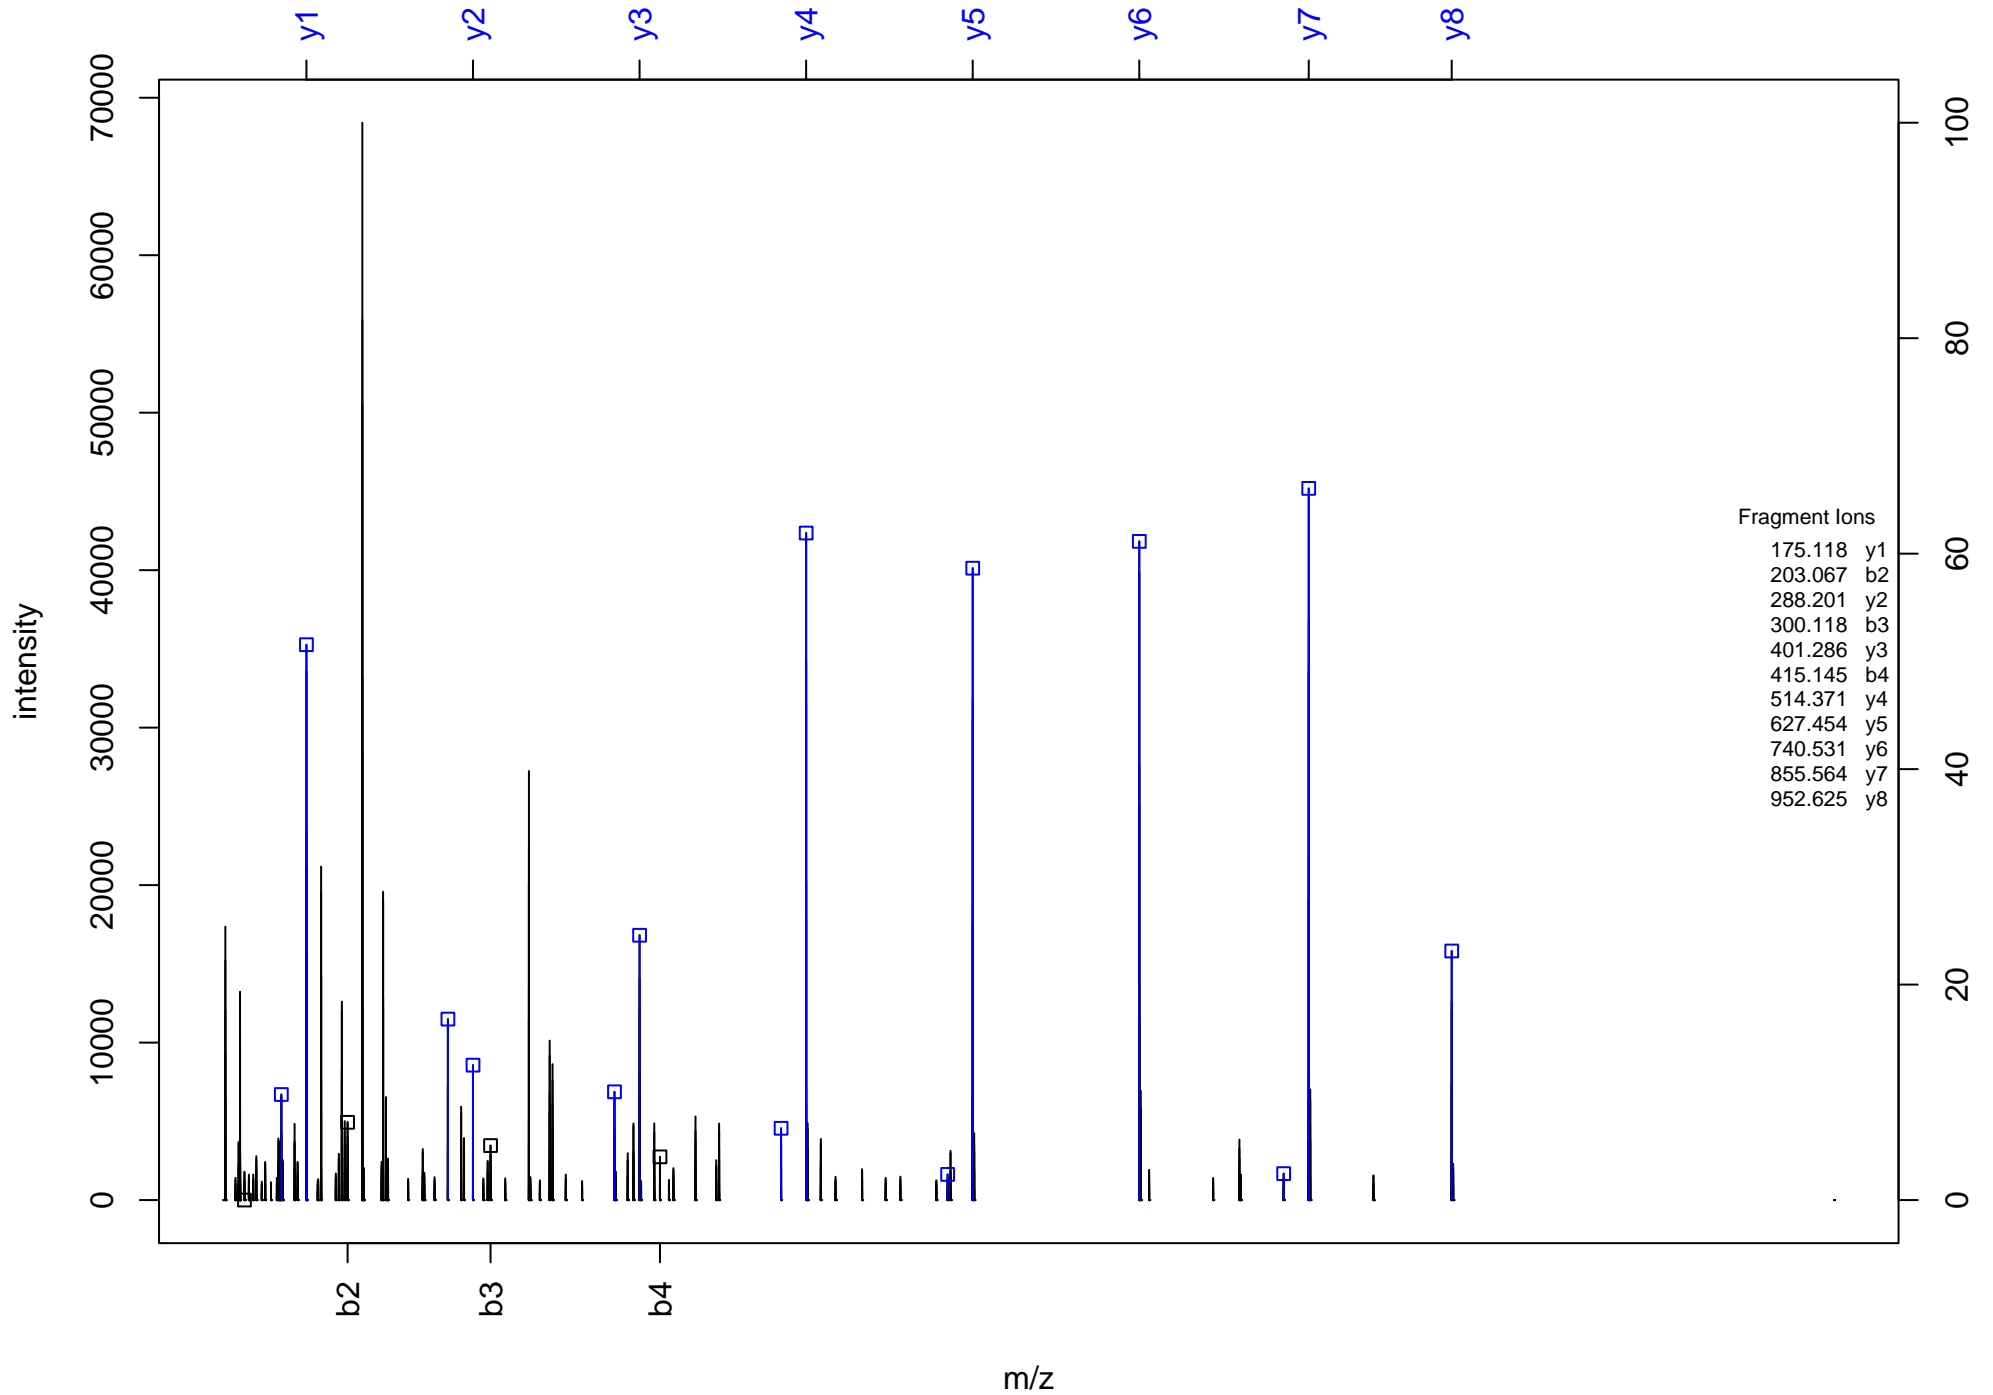

# RQ^VSAESSSSM\*N^SN^TPLVR

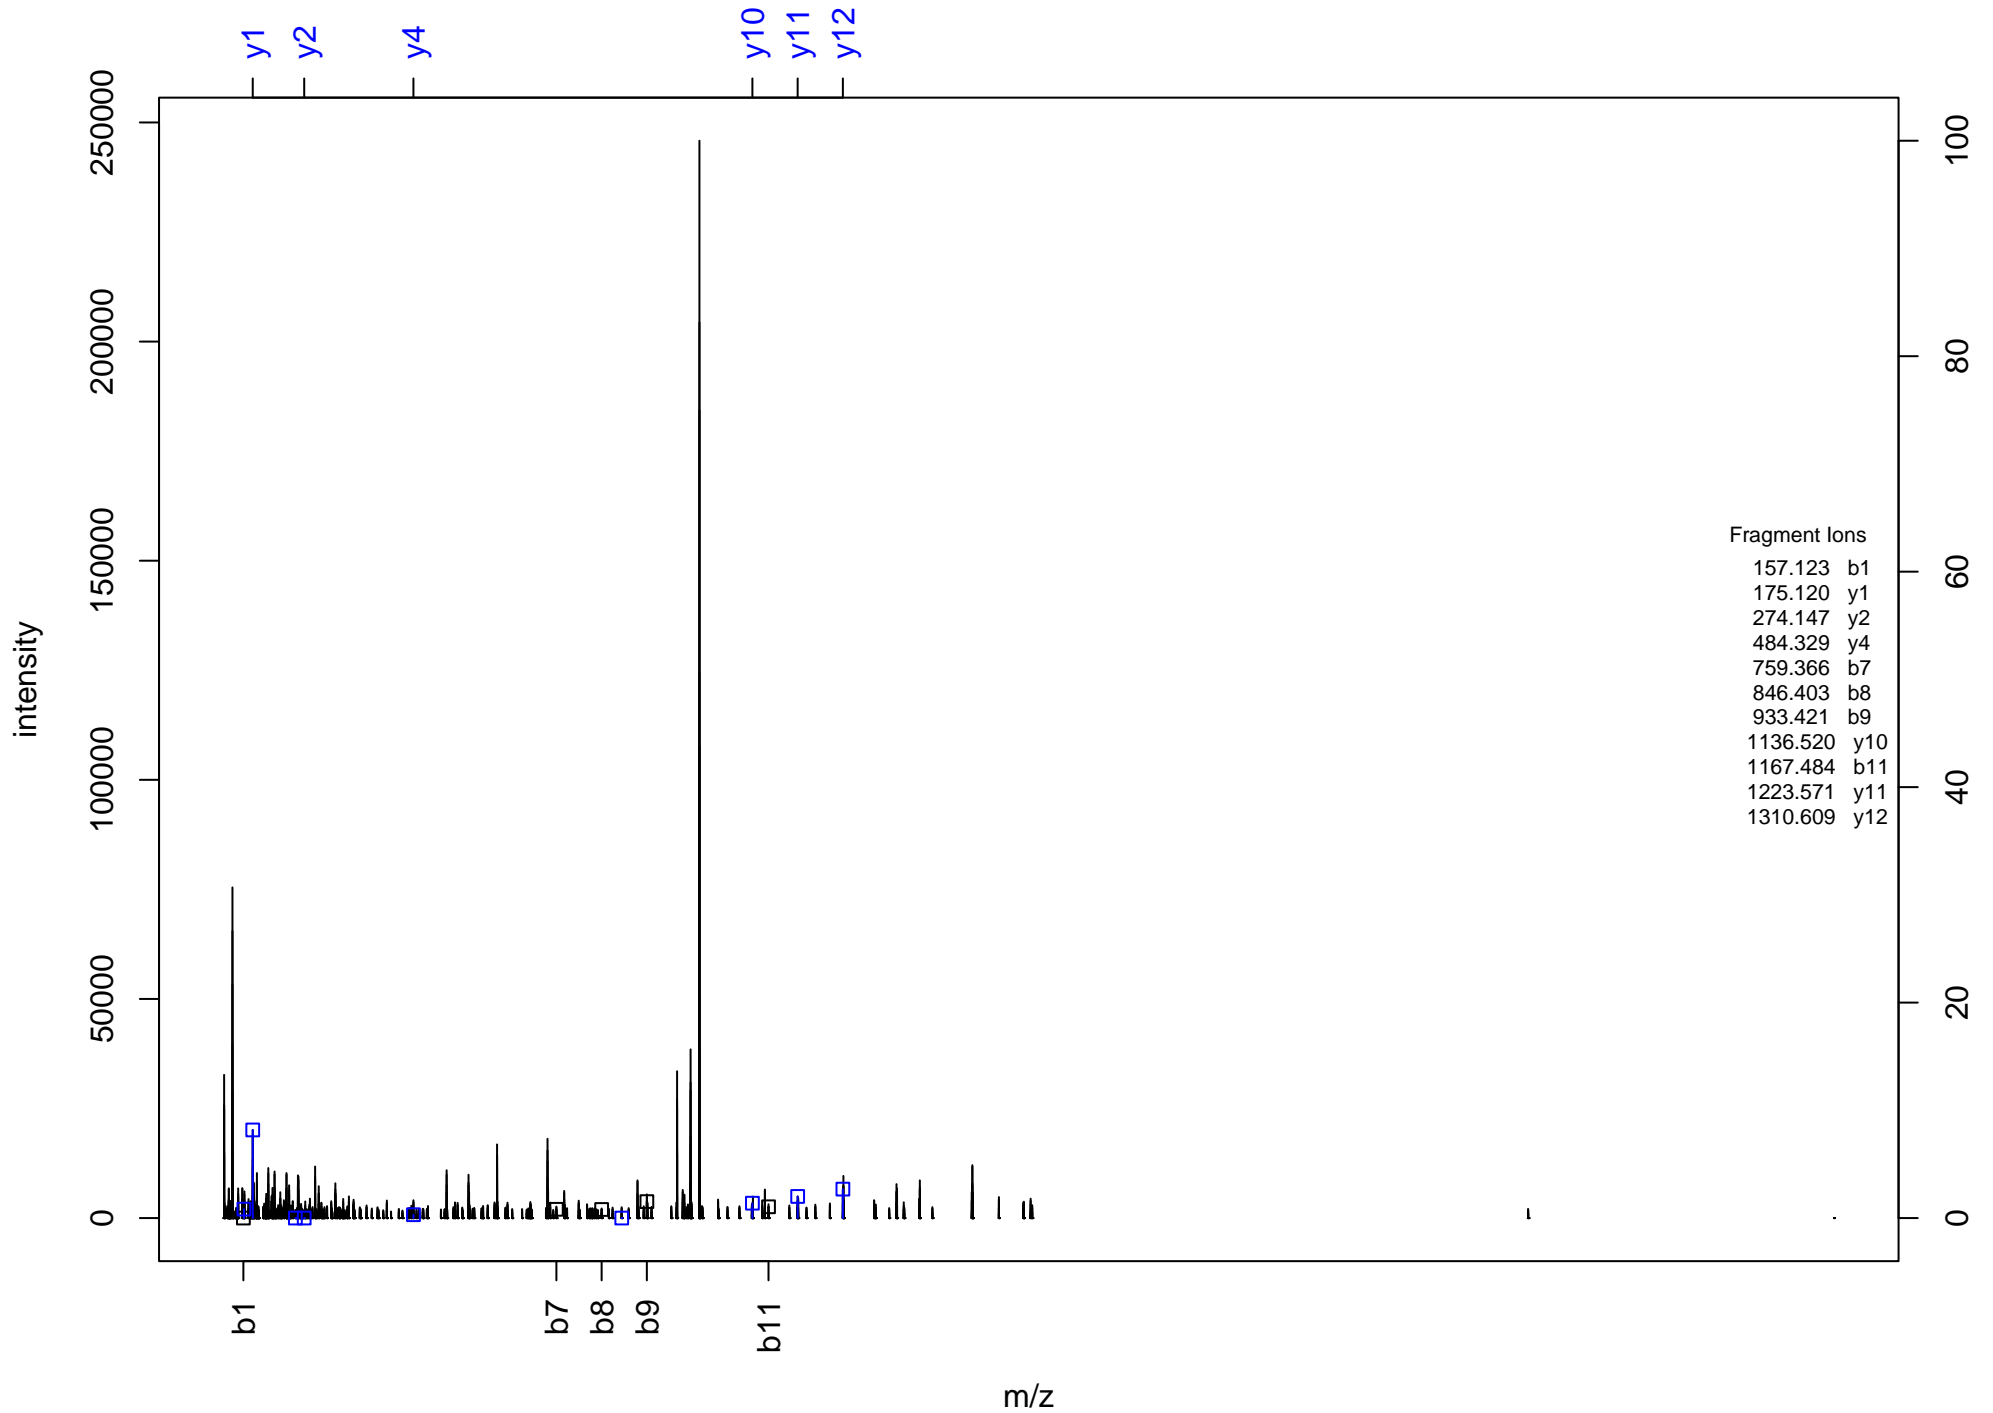

(Ac)MSLN^TSSN^ATPGDTQ^RLK

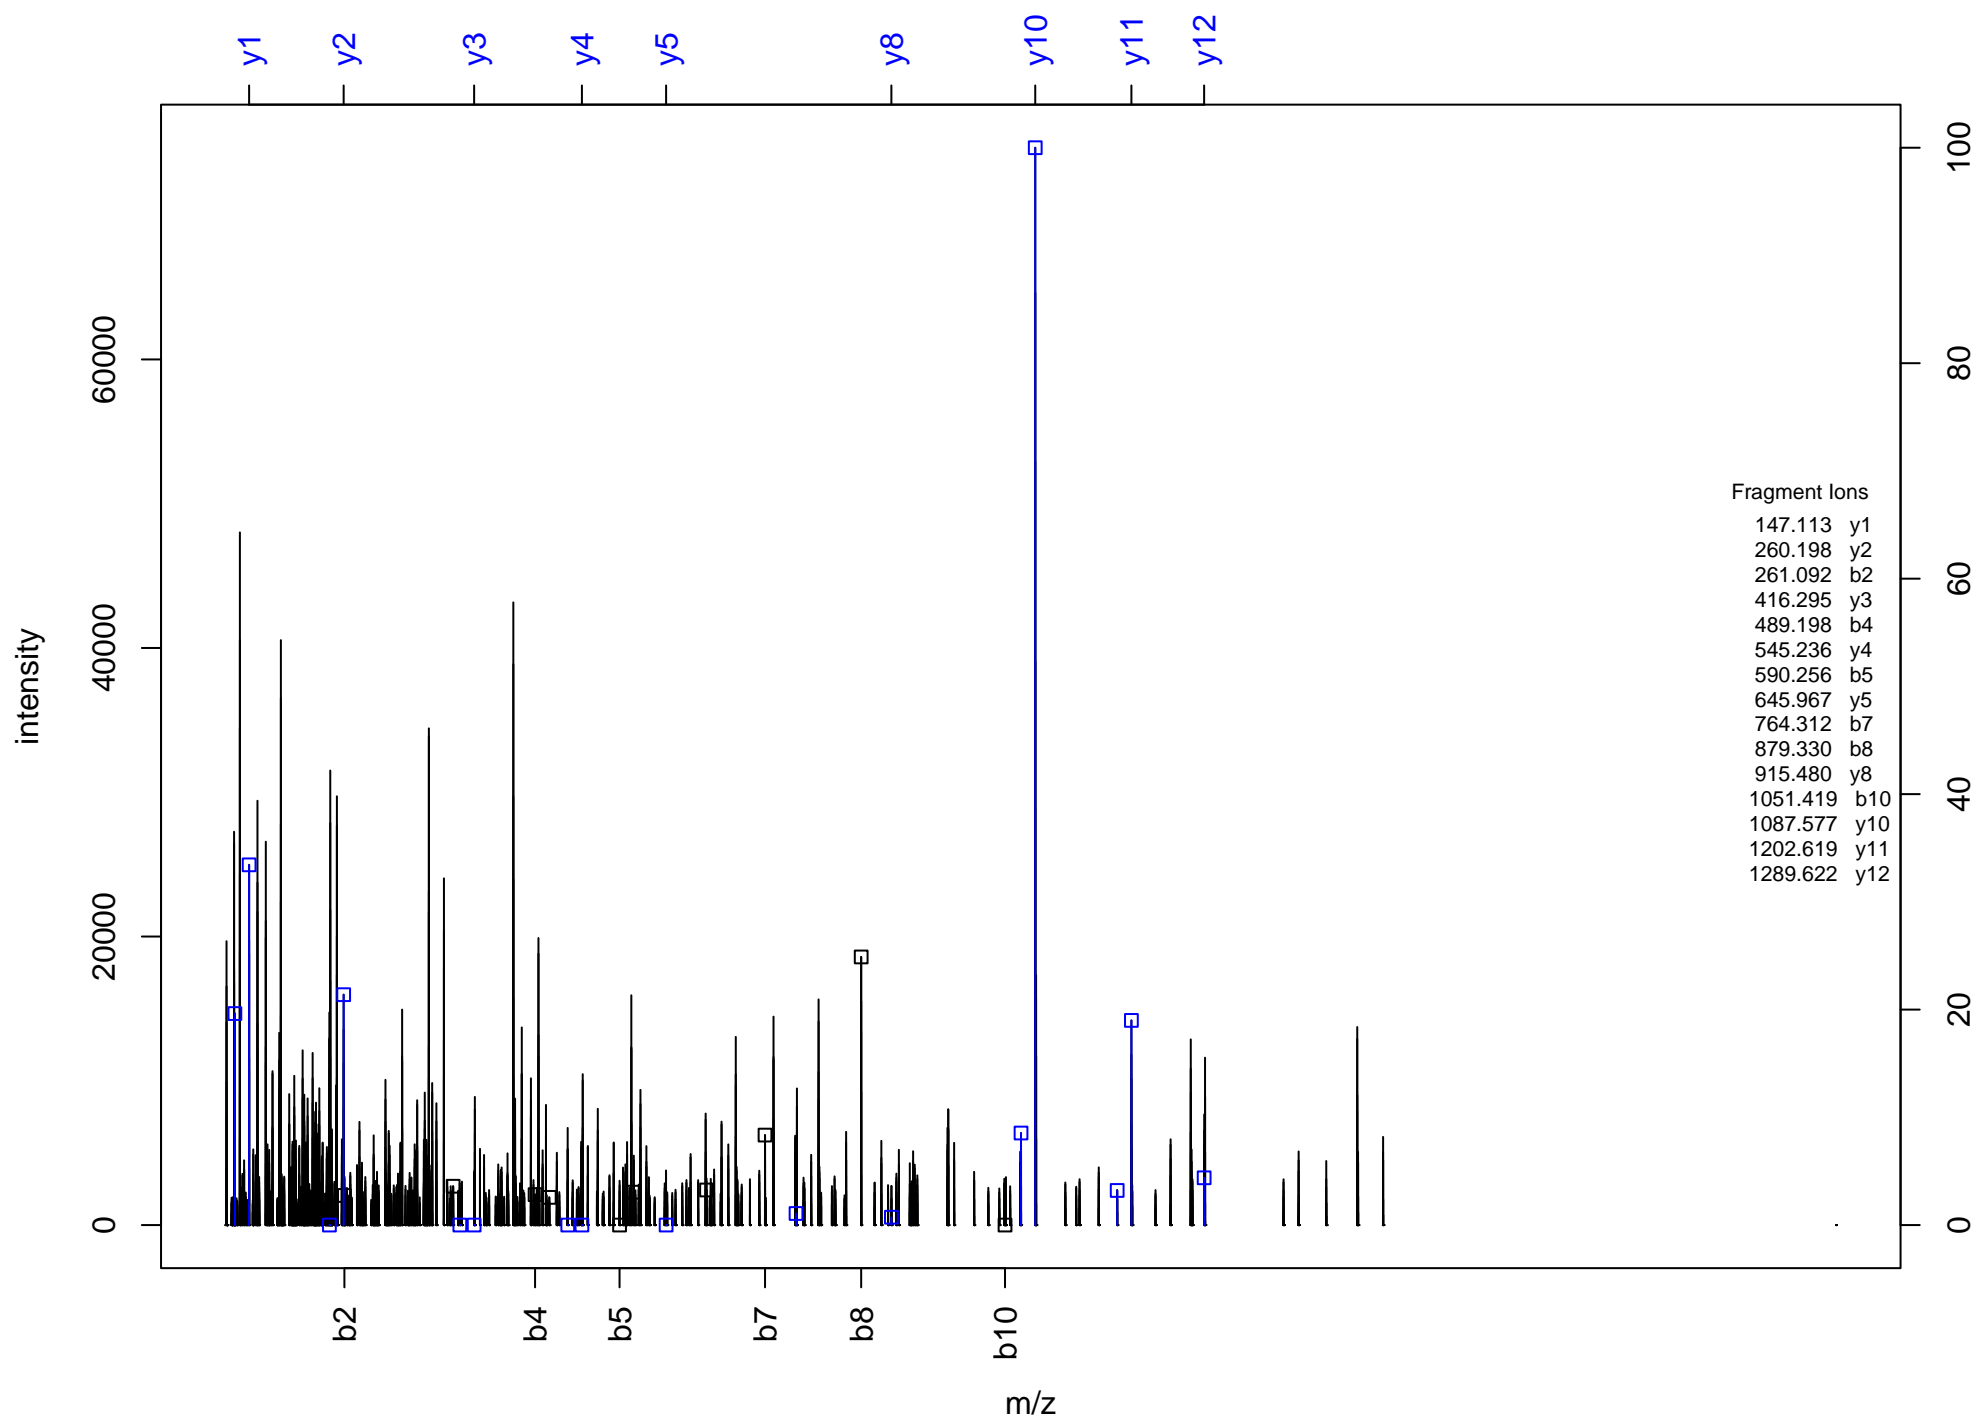

# MAVAAQEGDAHPLGALPVGTLINNVESEPGR

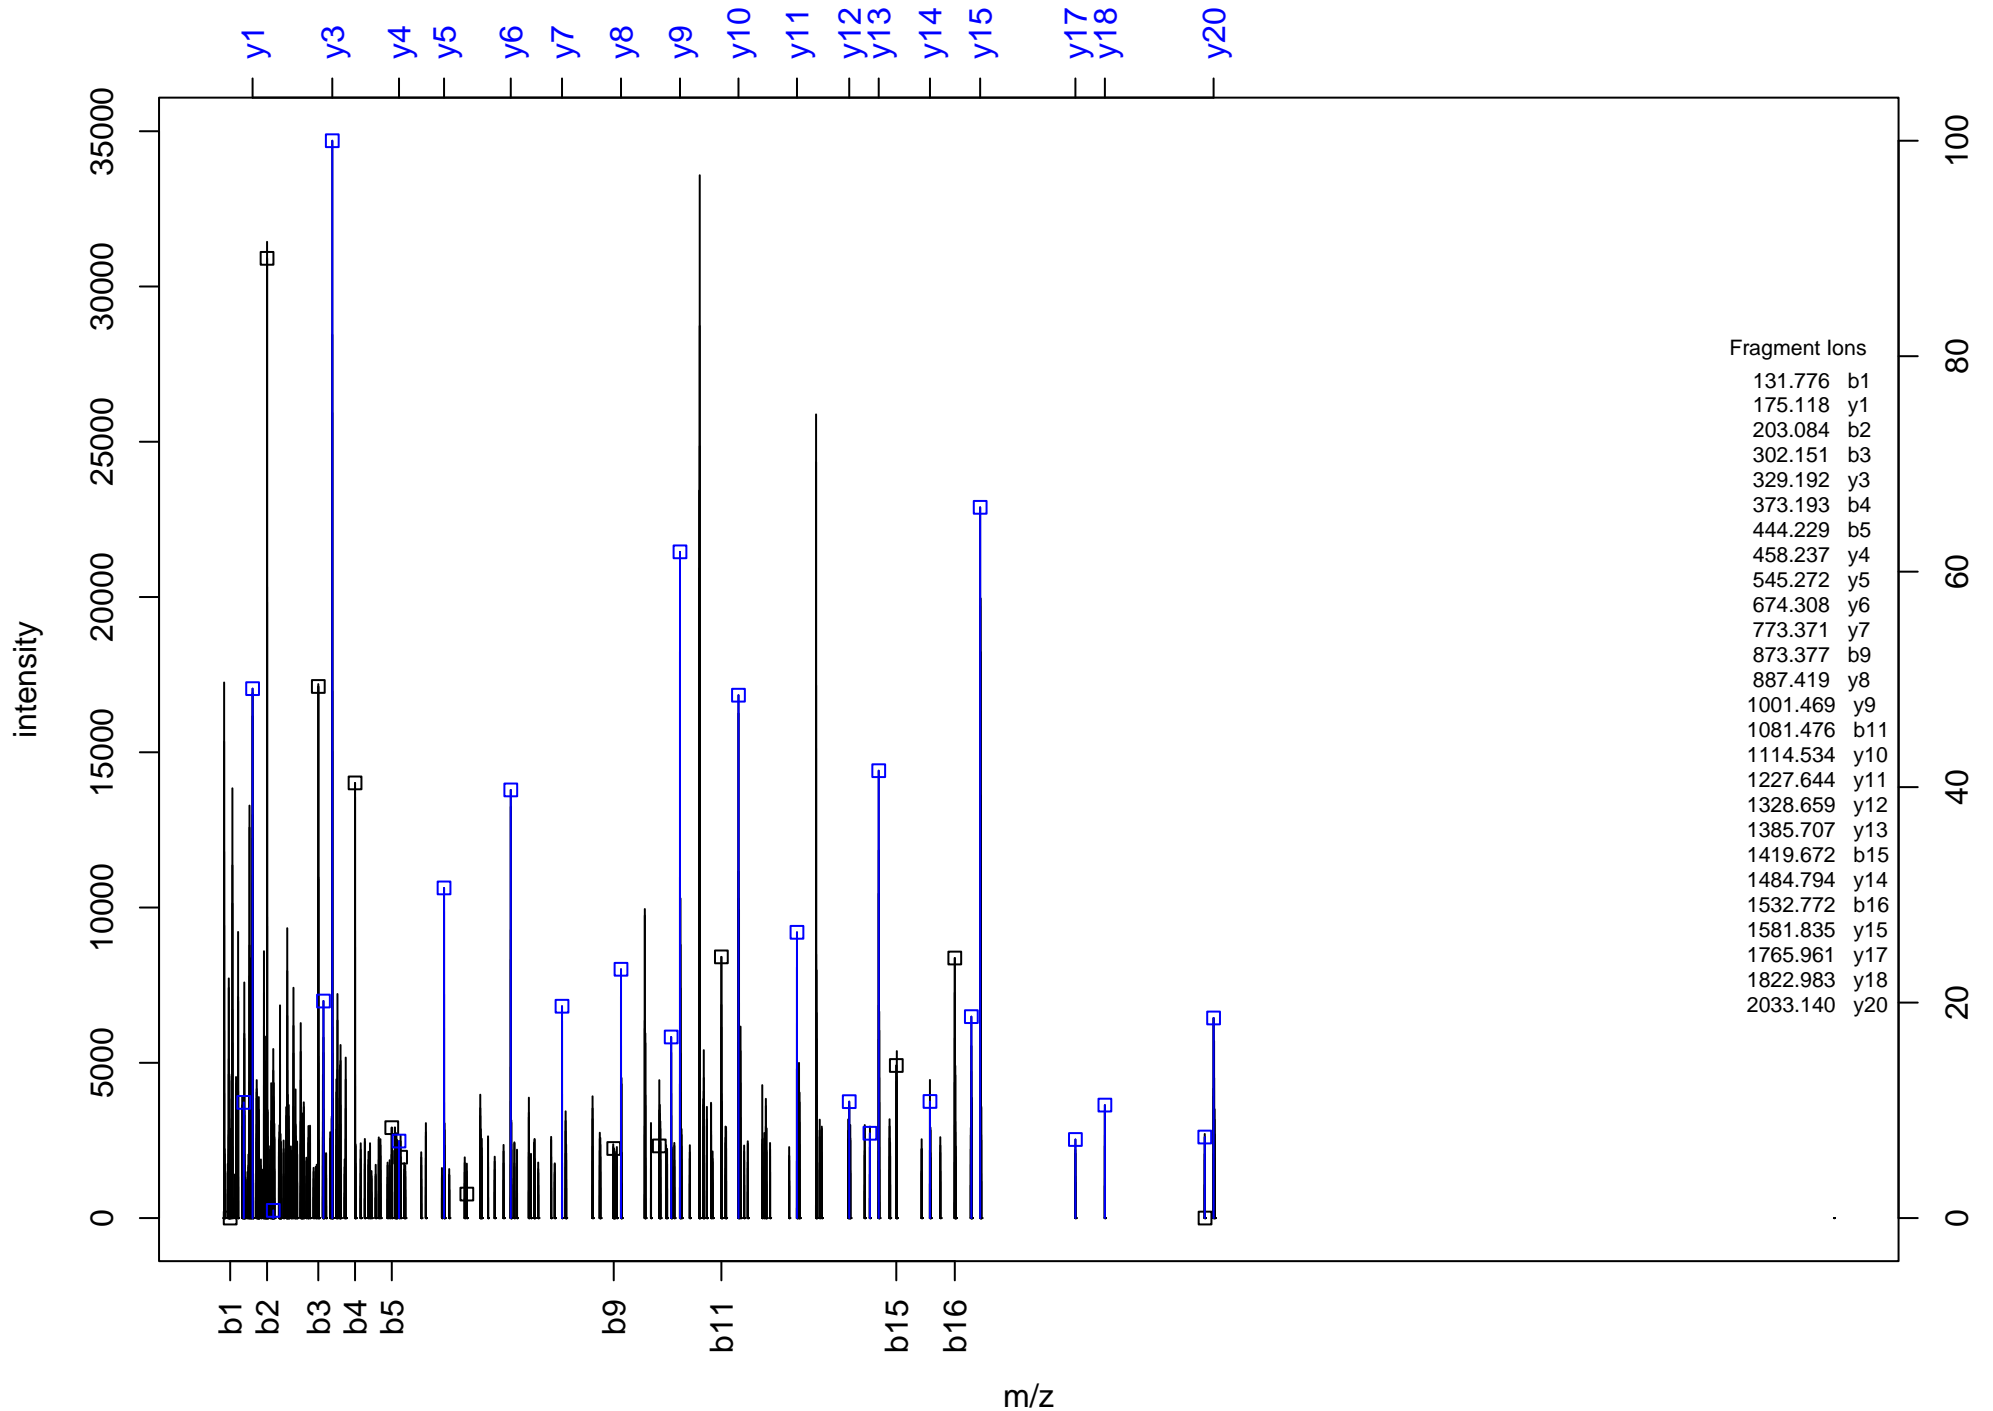

# NLESLYFSNNK

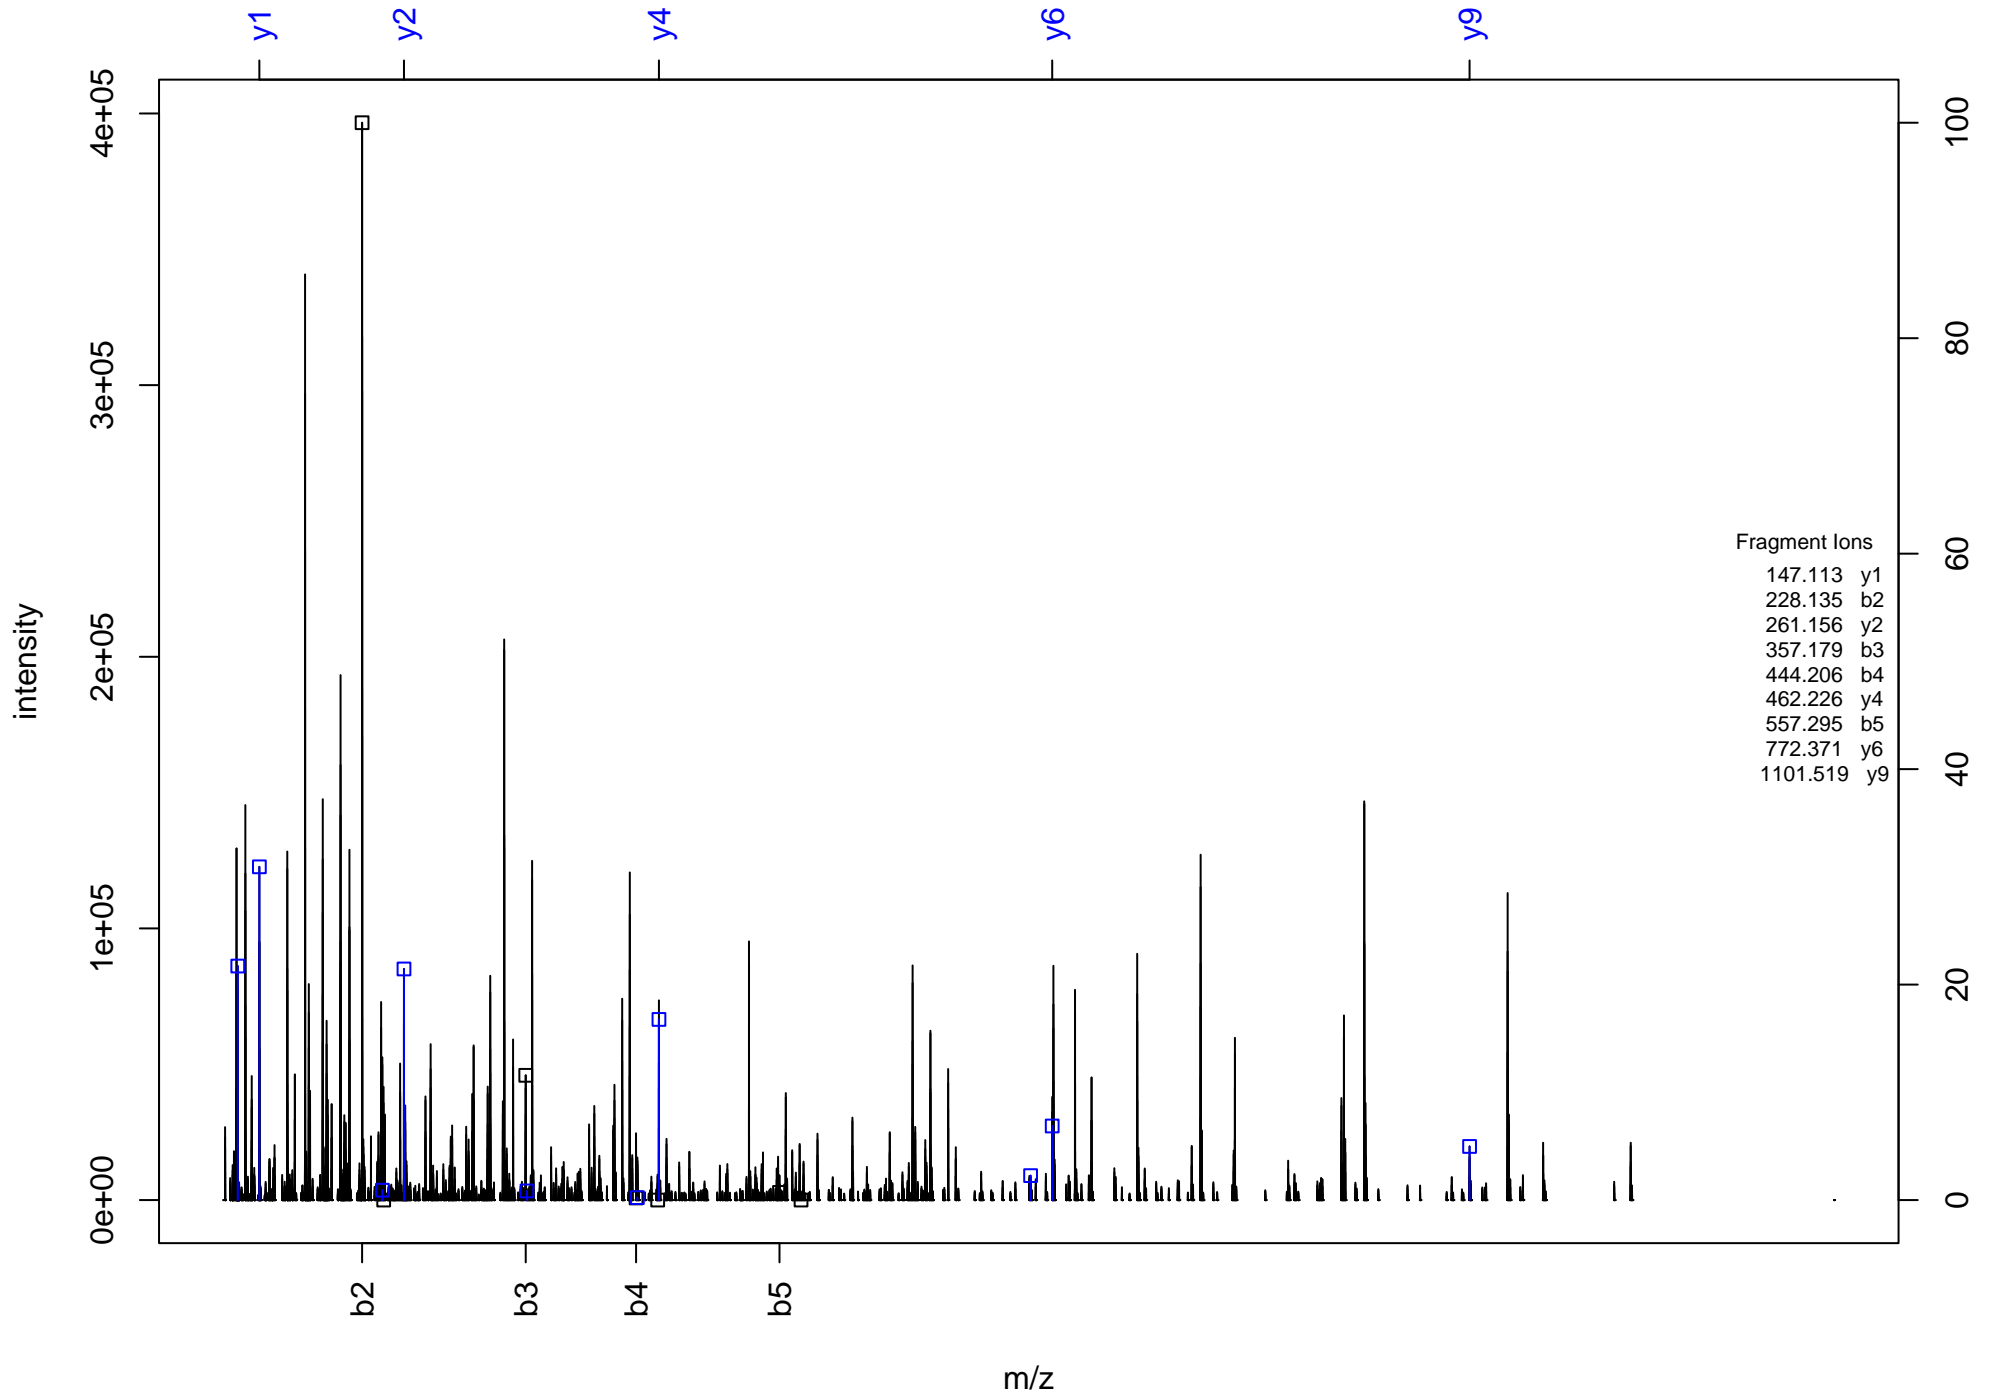

# TFFLEALR

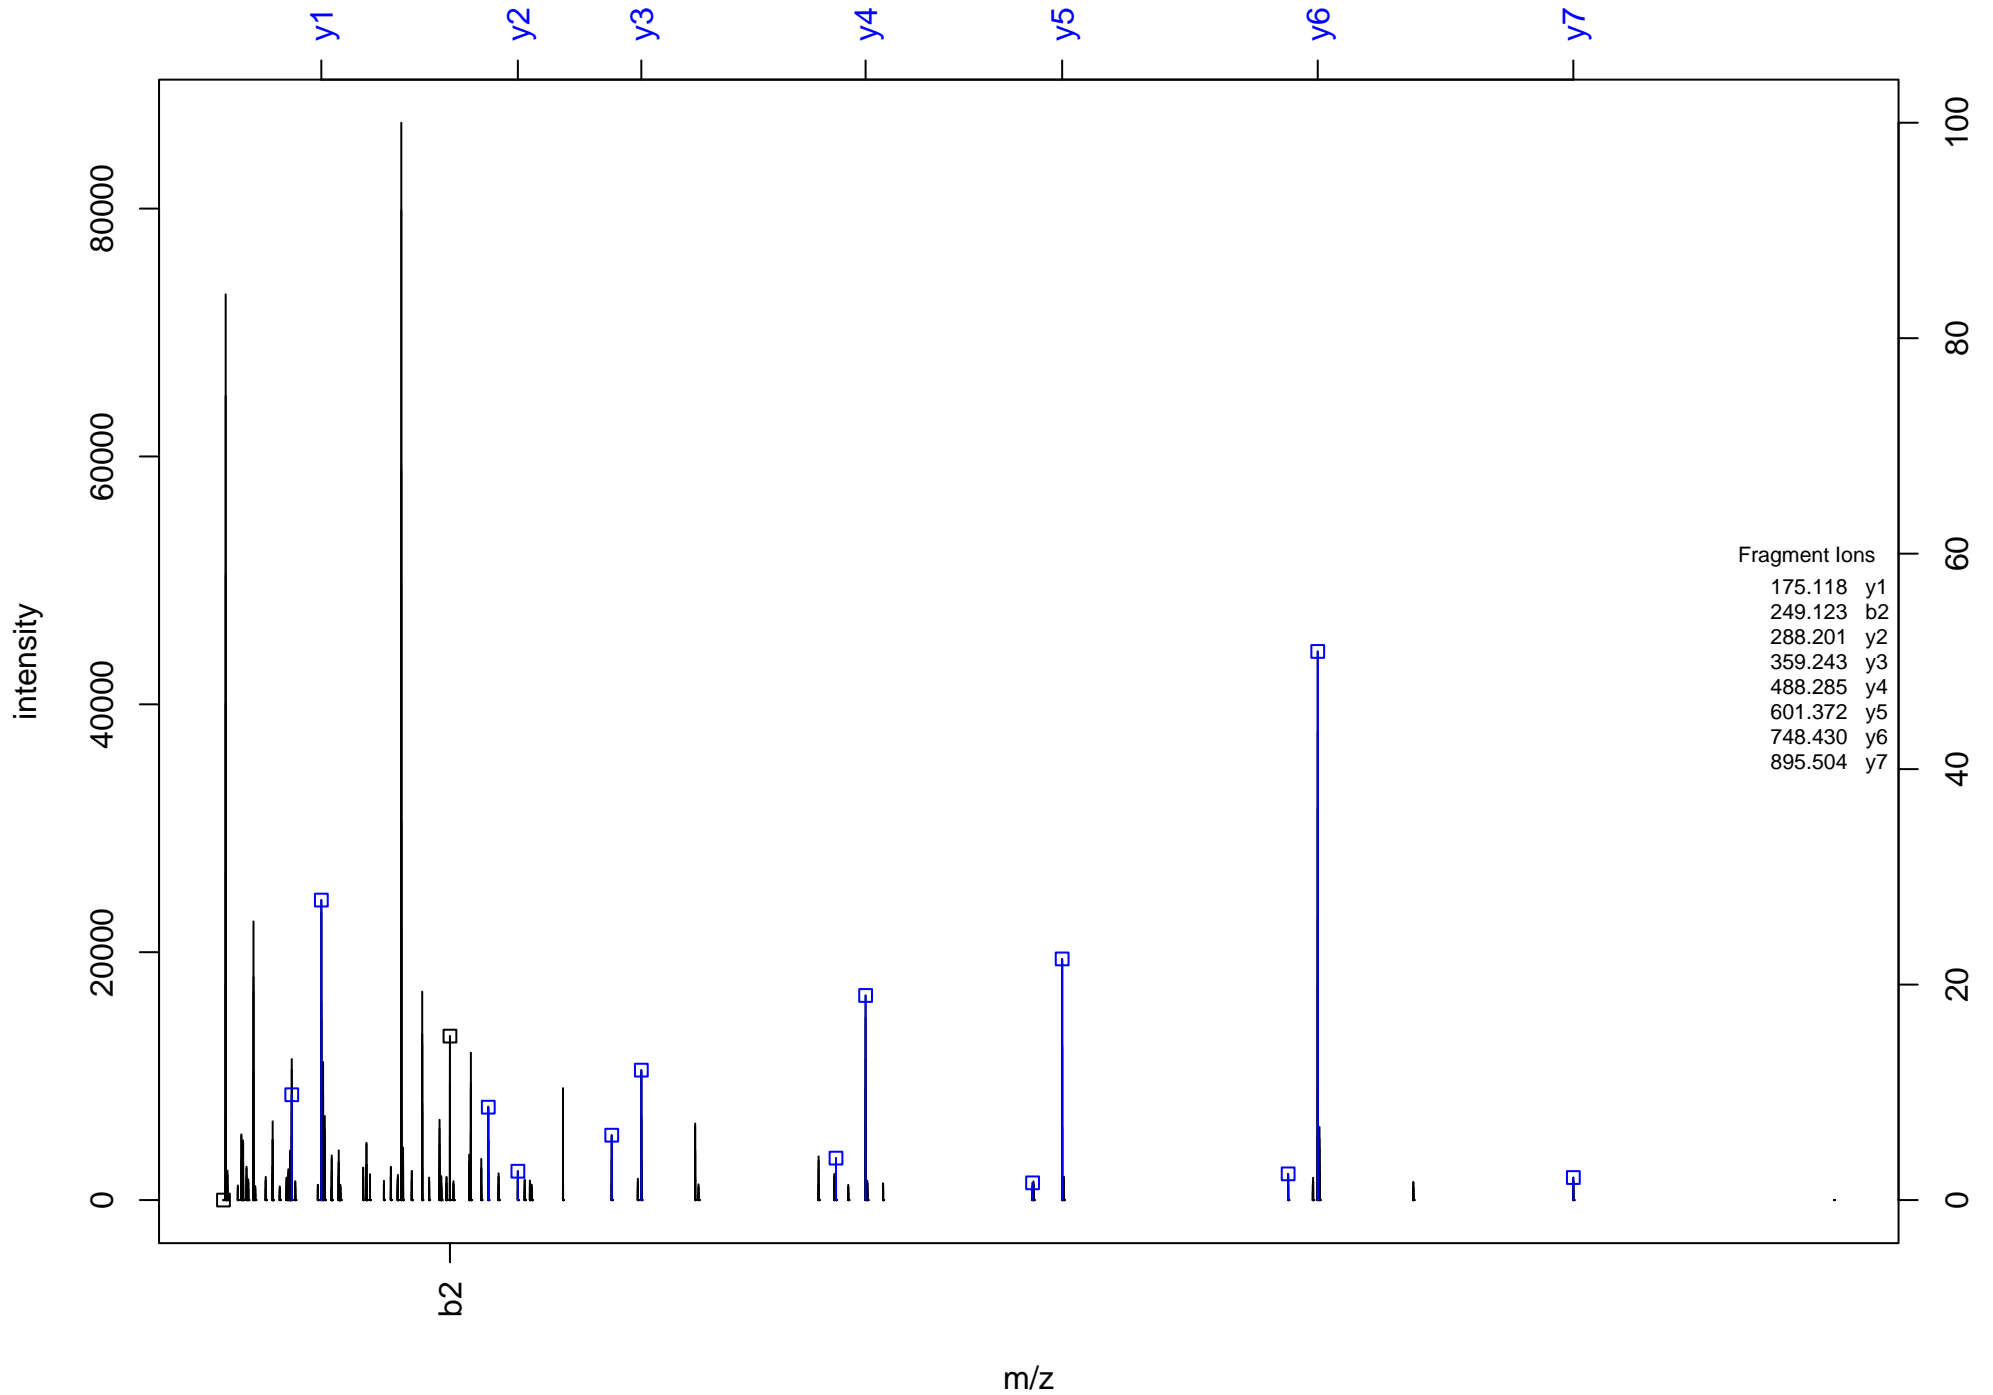

# WKIEN^DQ^LPR

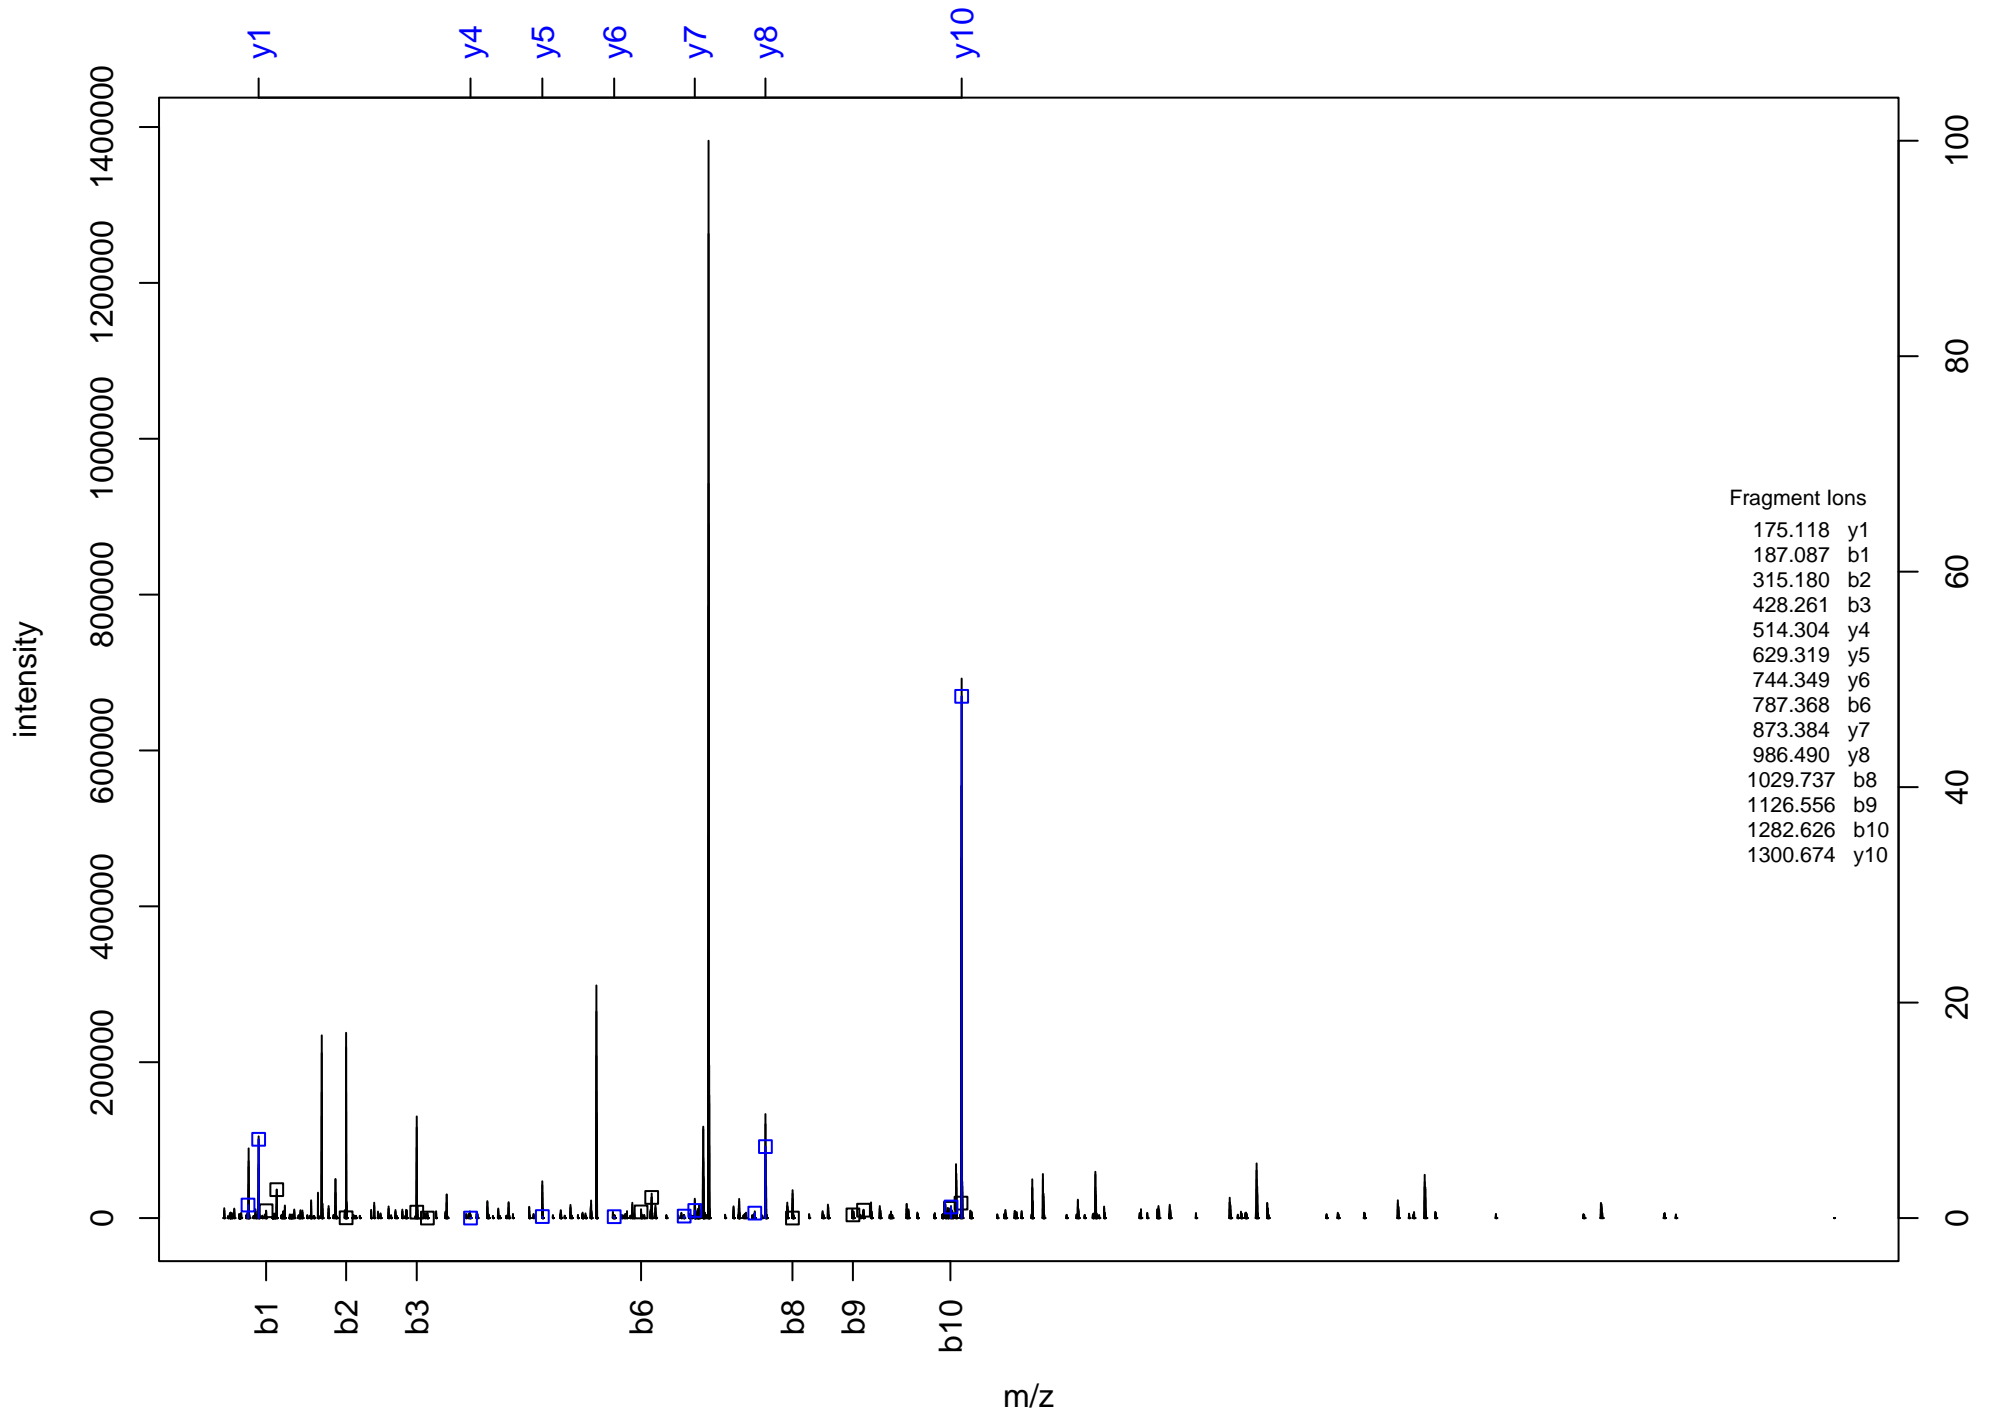

# LCEPPVLSSVEDTYSPFFR

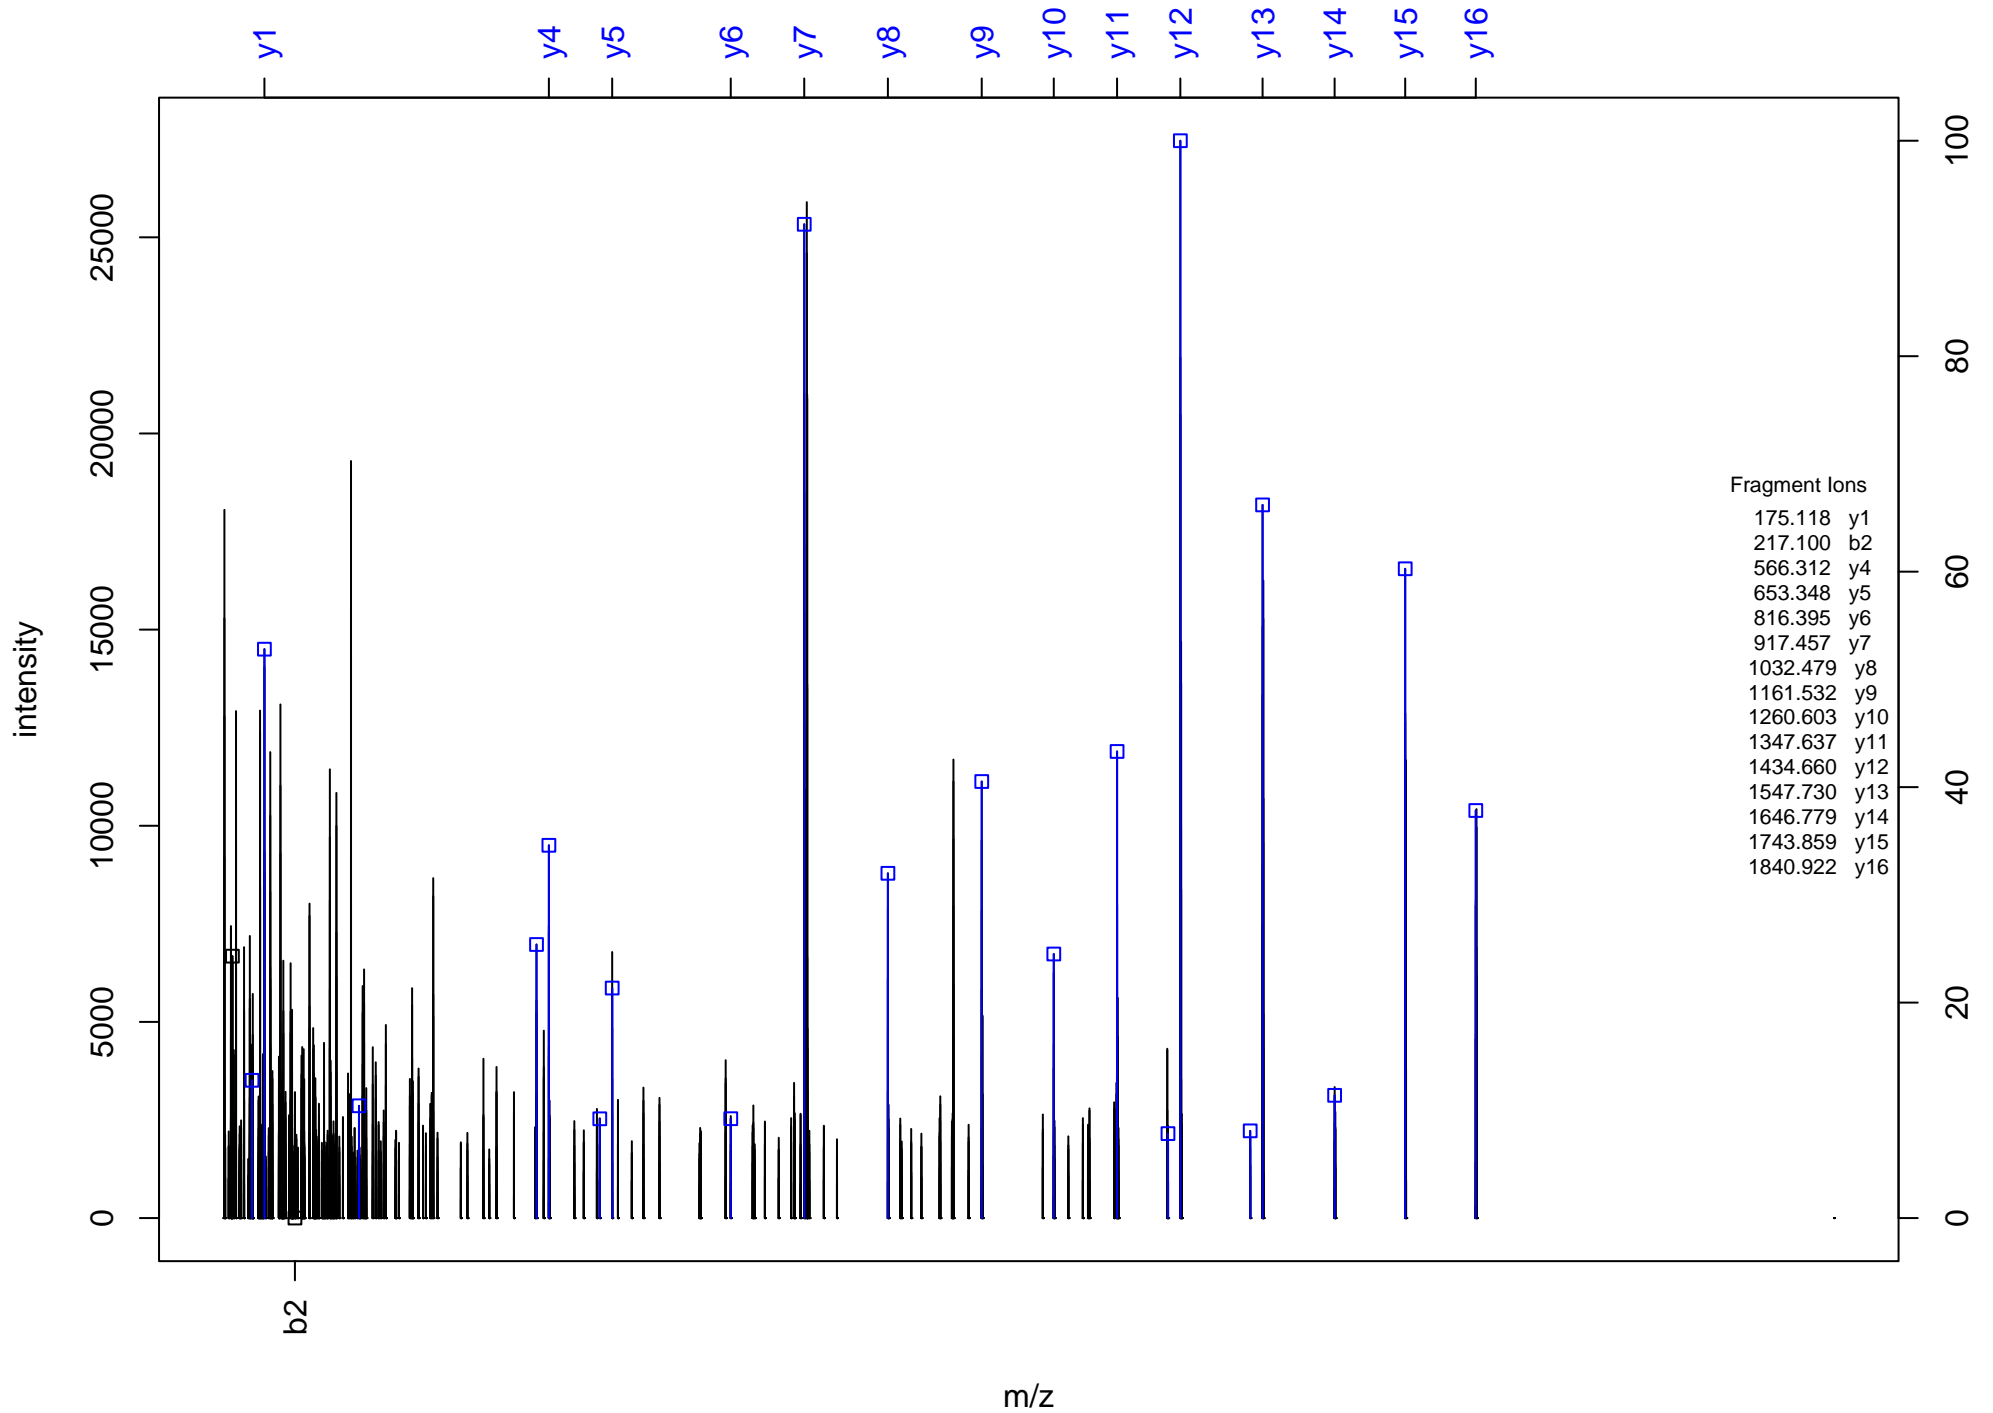



# LAFPELDMVDLQR

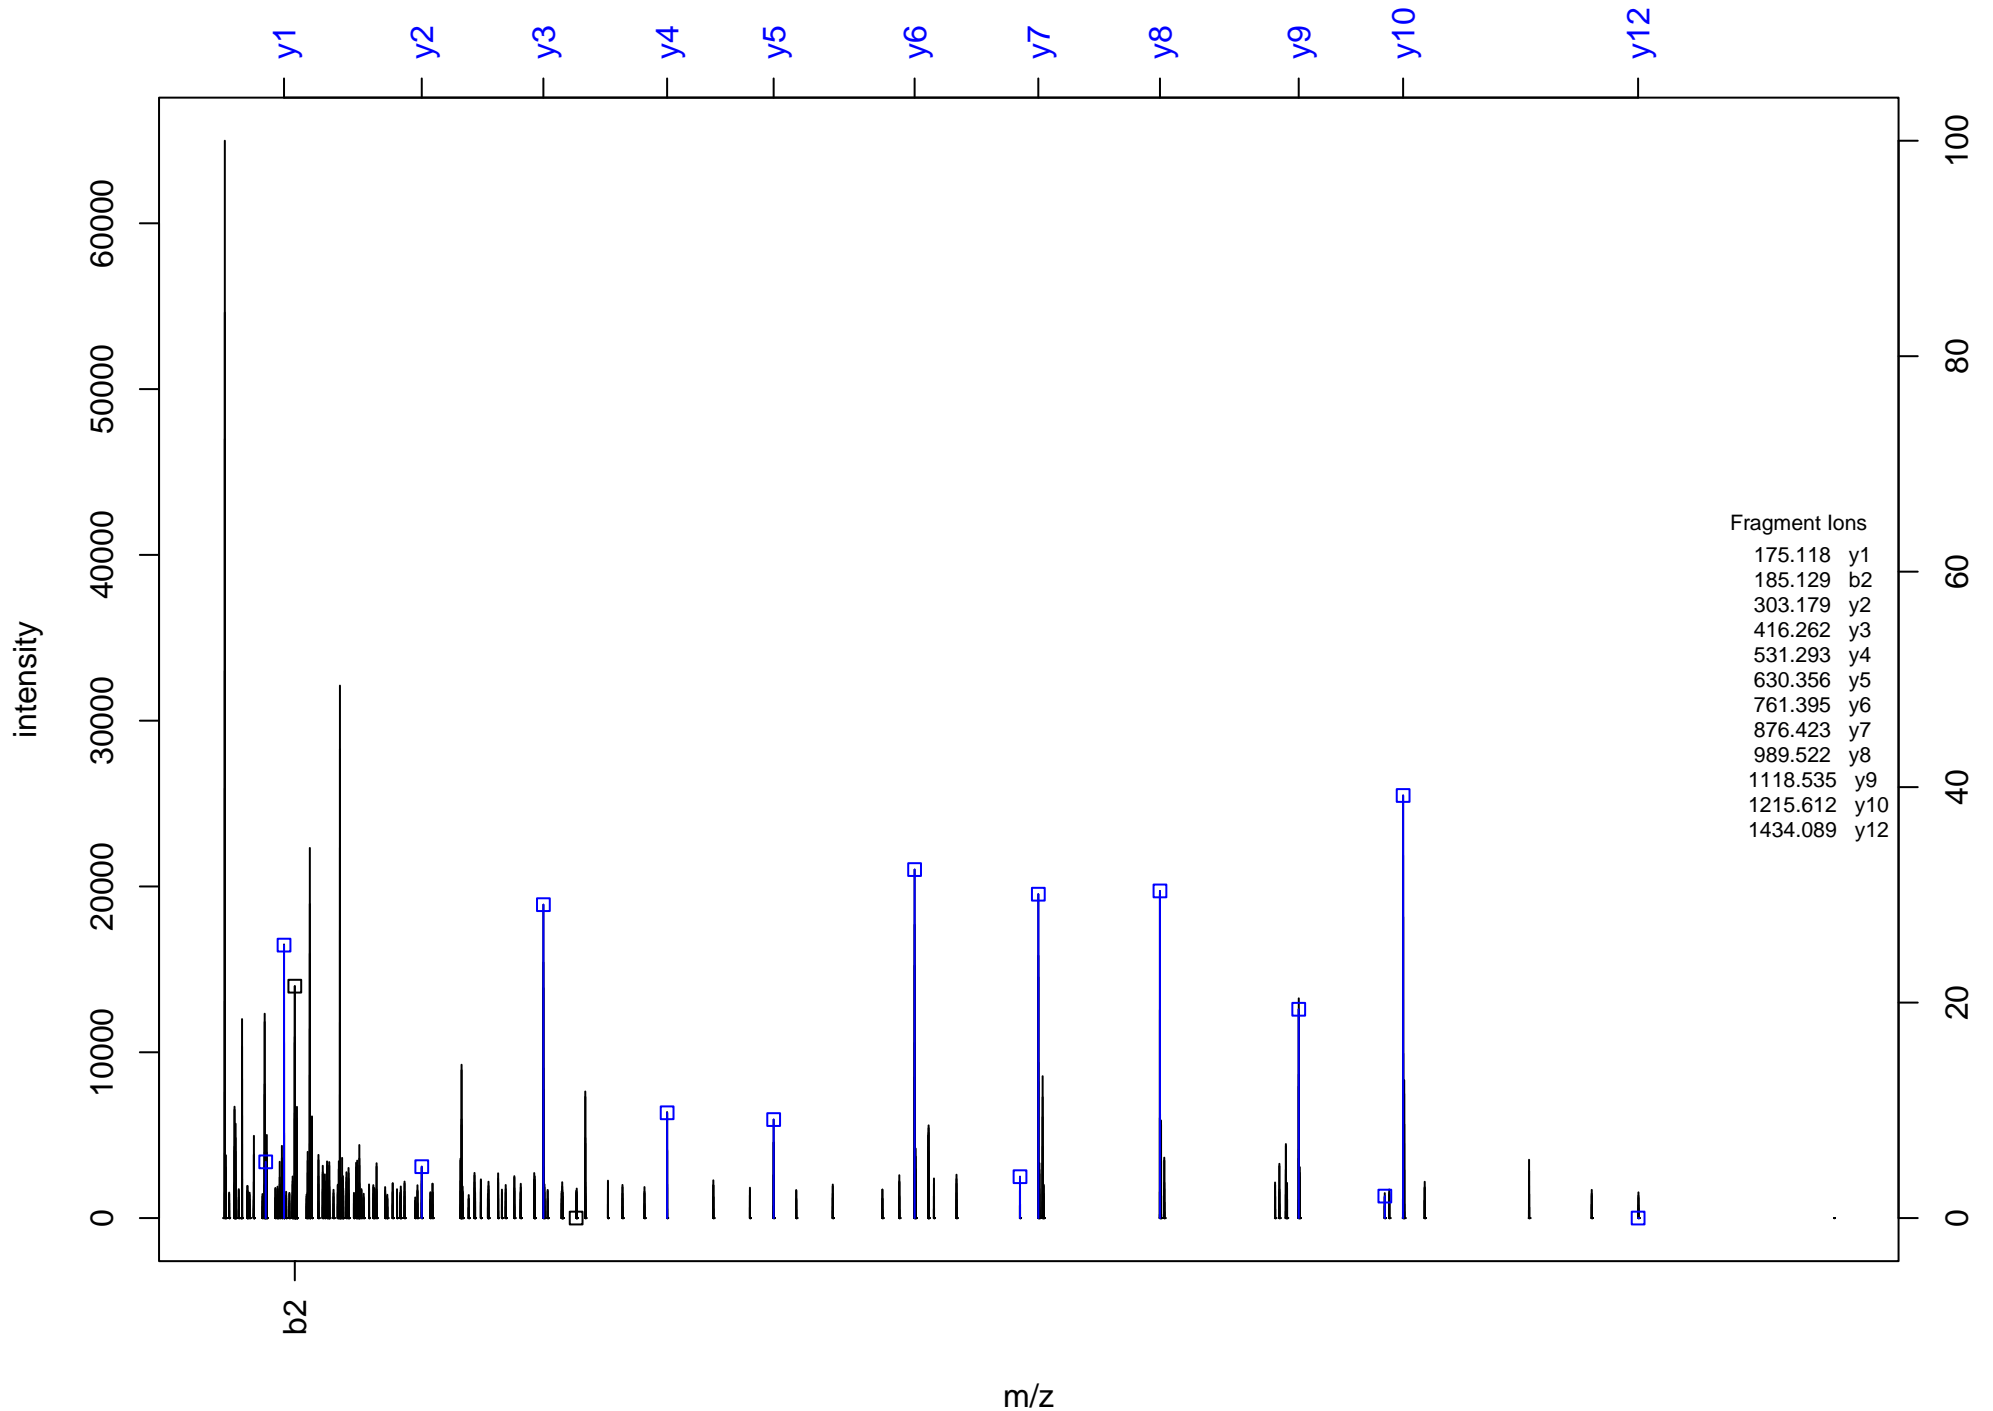

# EGVLTSLR

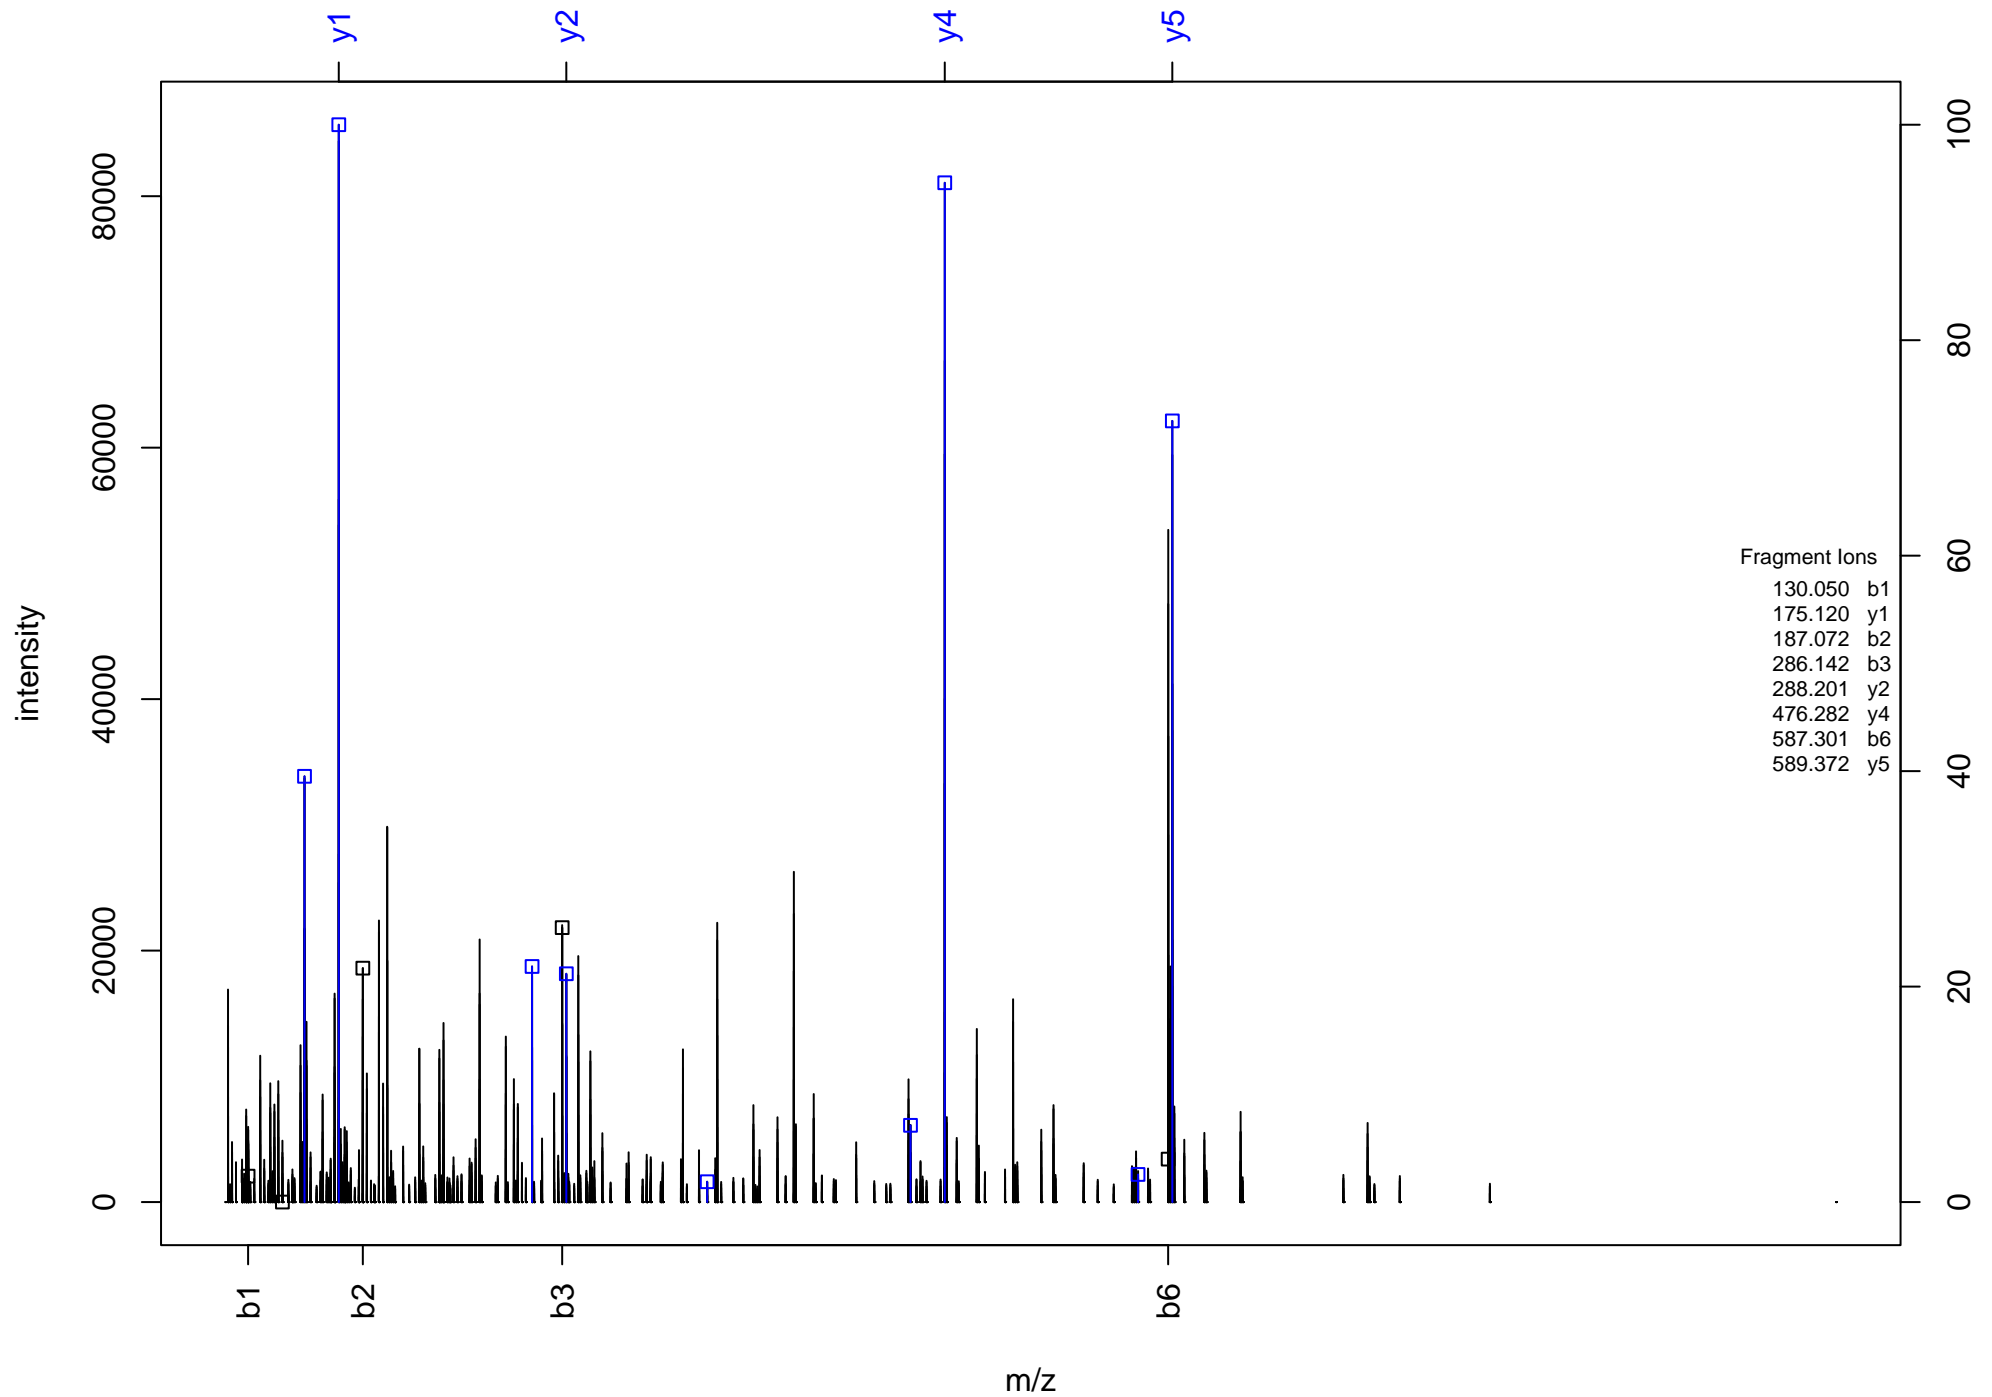

# TLEEN^K

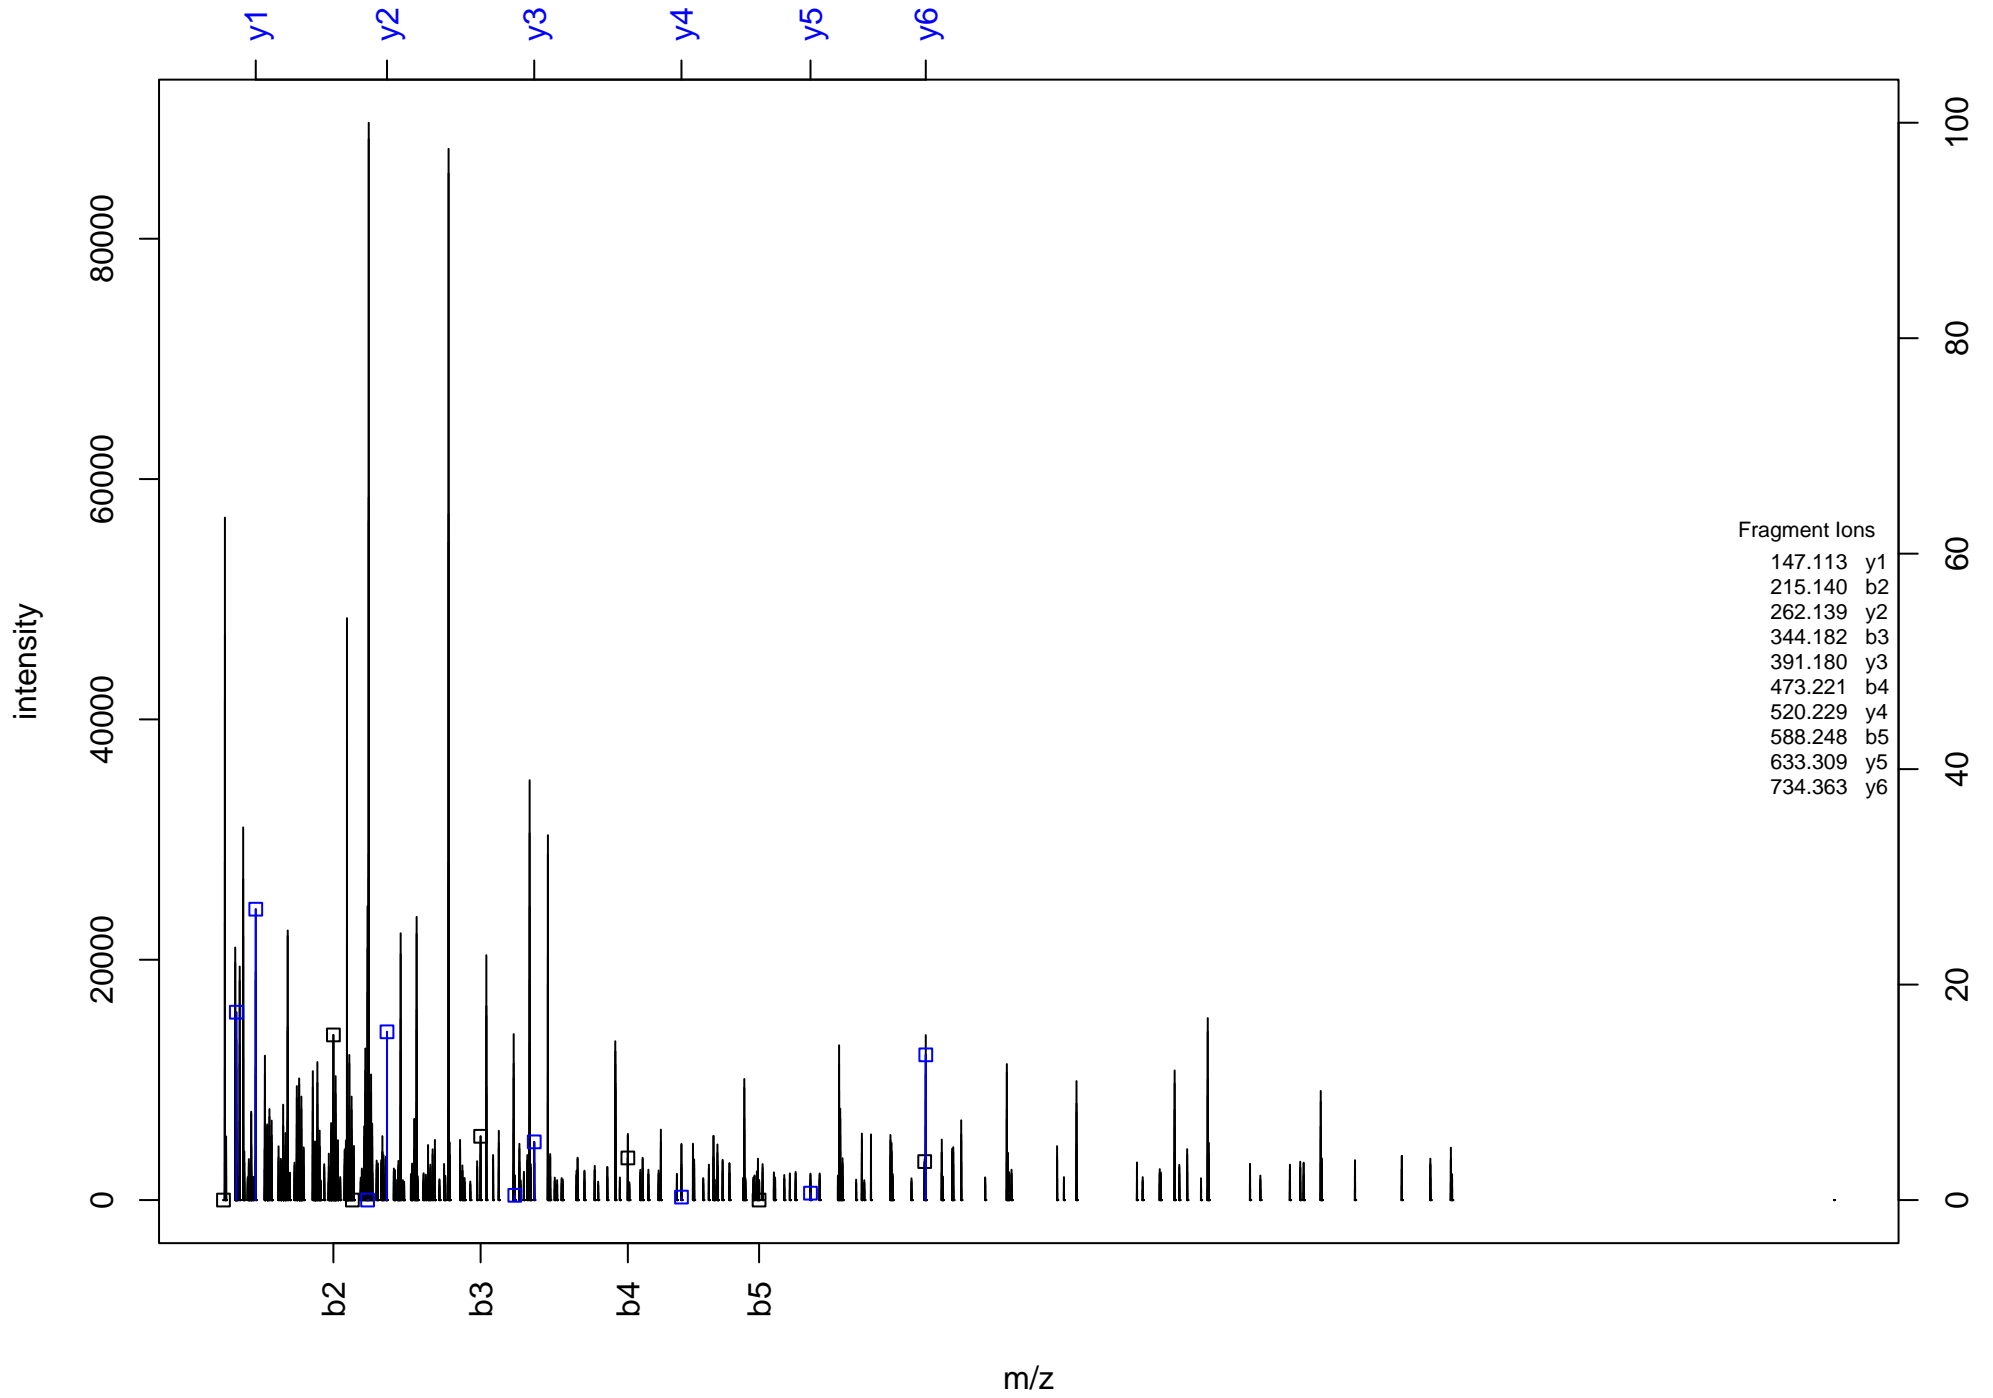

# RM\*N^SLKPDLM\*QLR

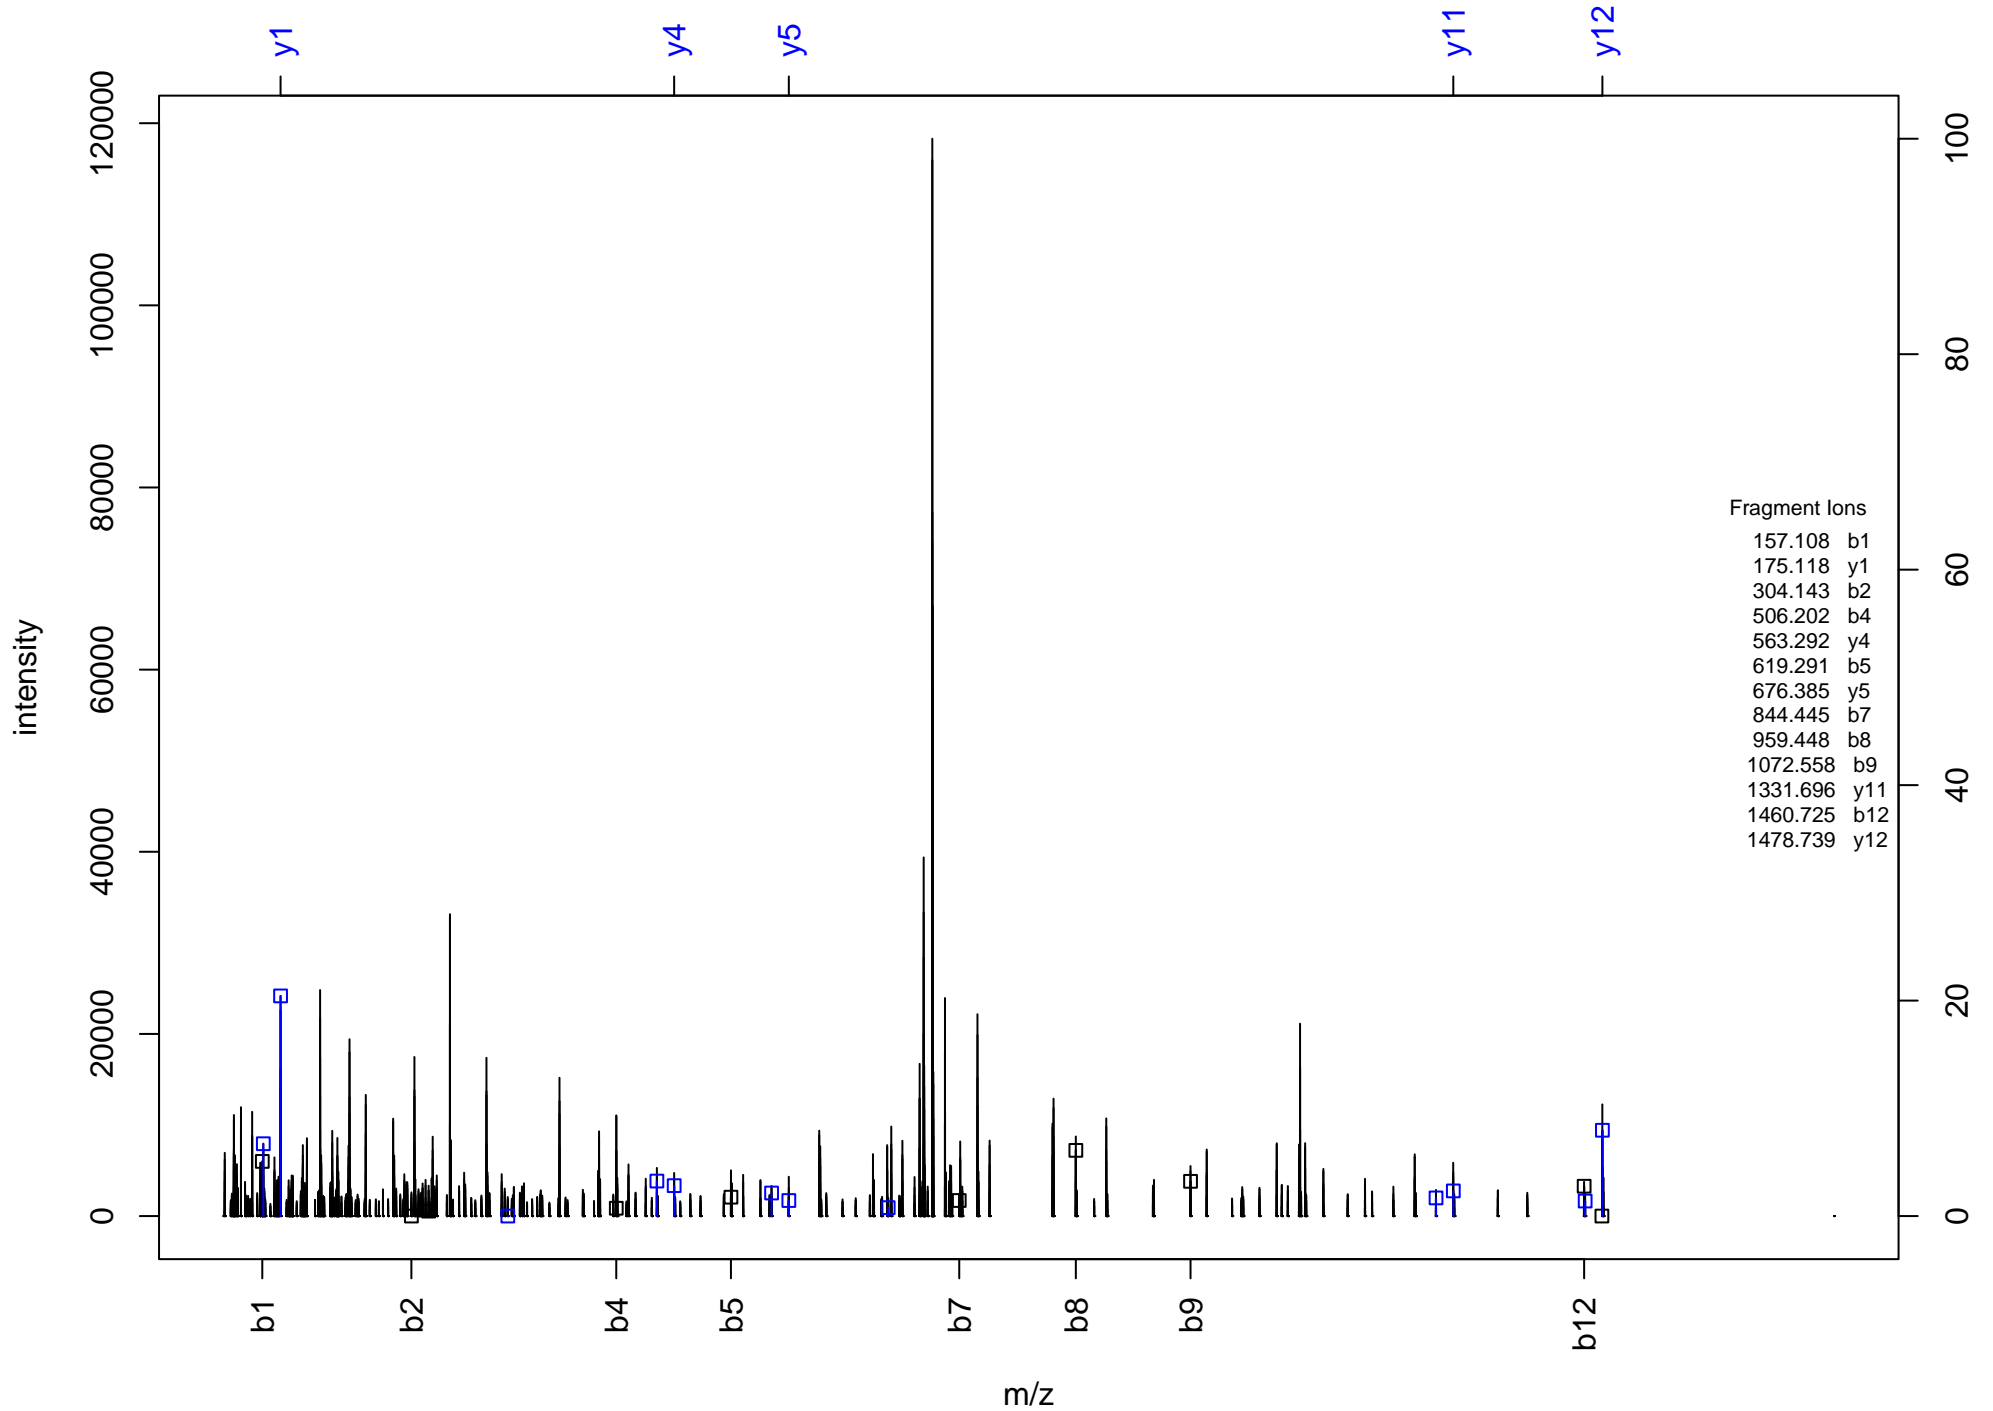

# ILN<sup>+</sup>FIK

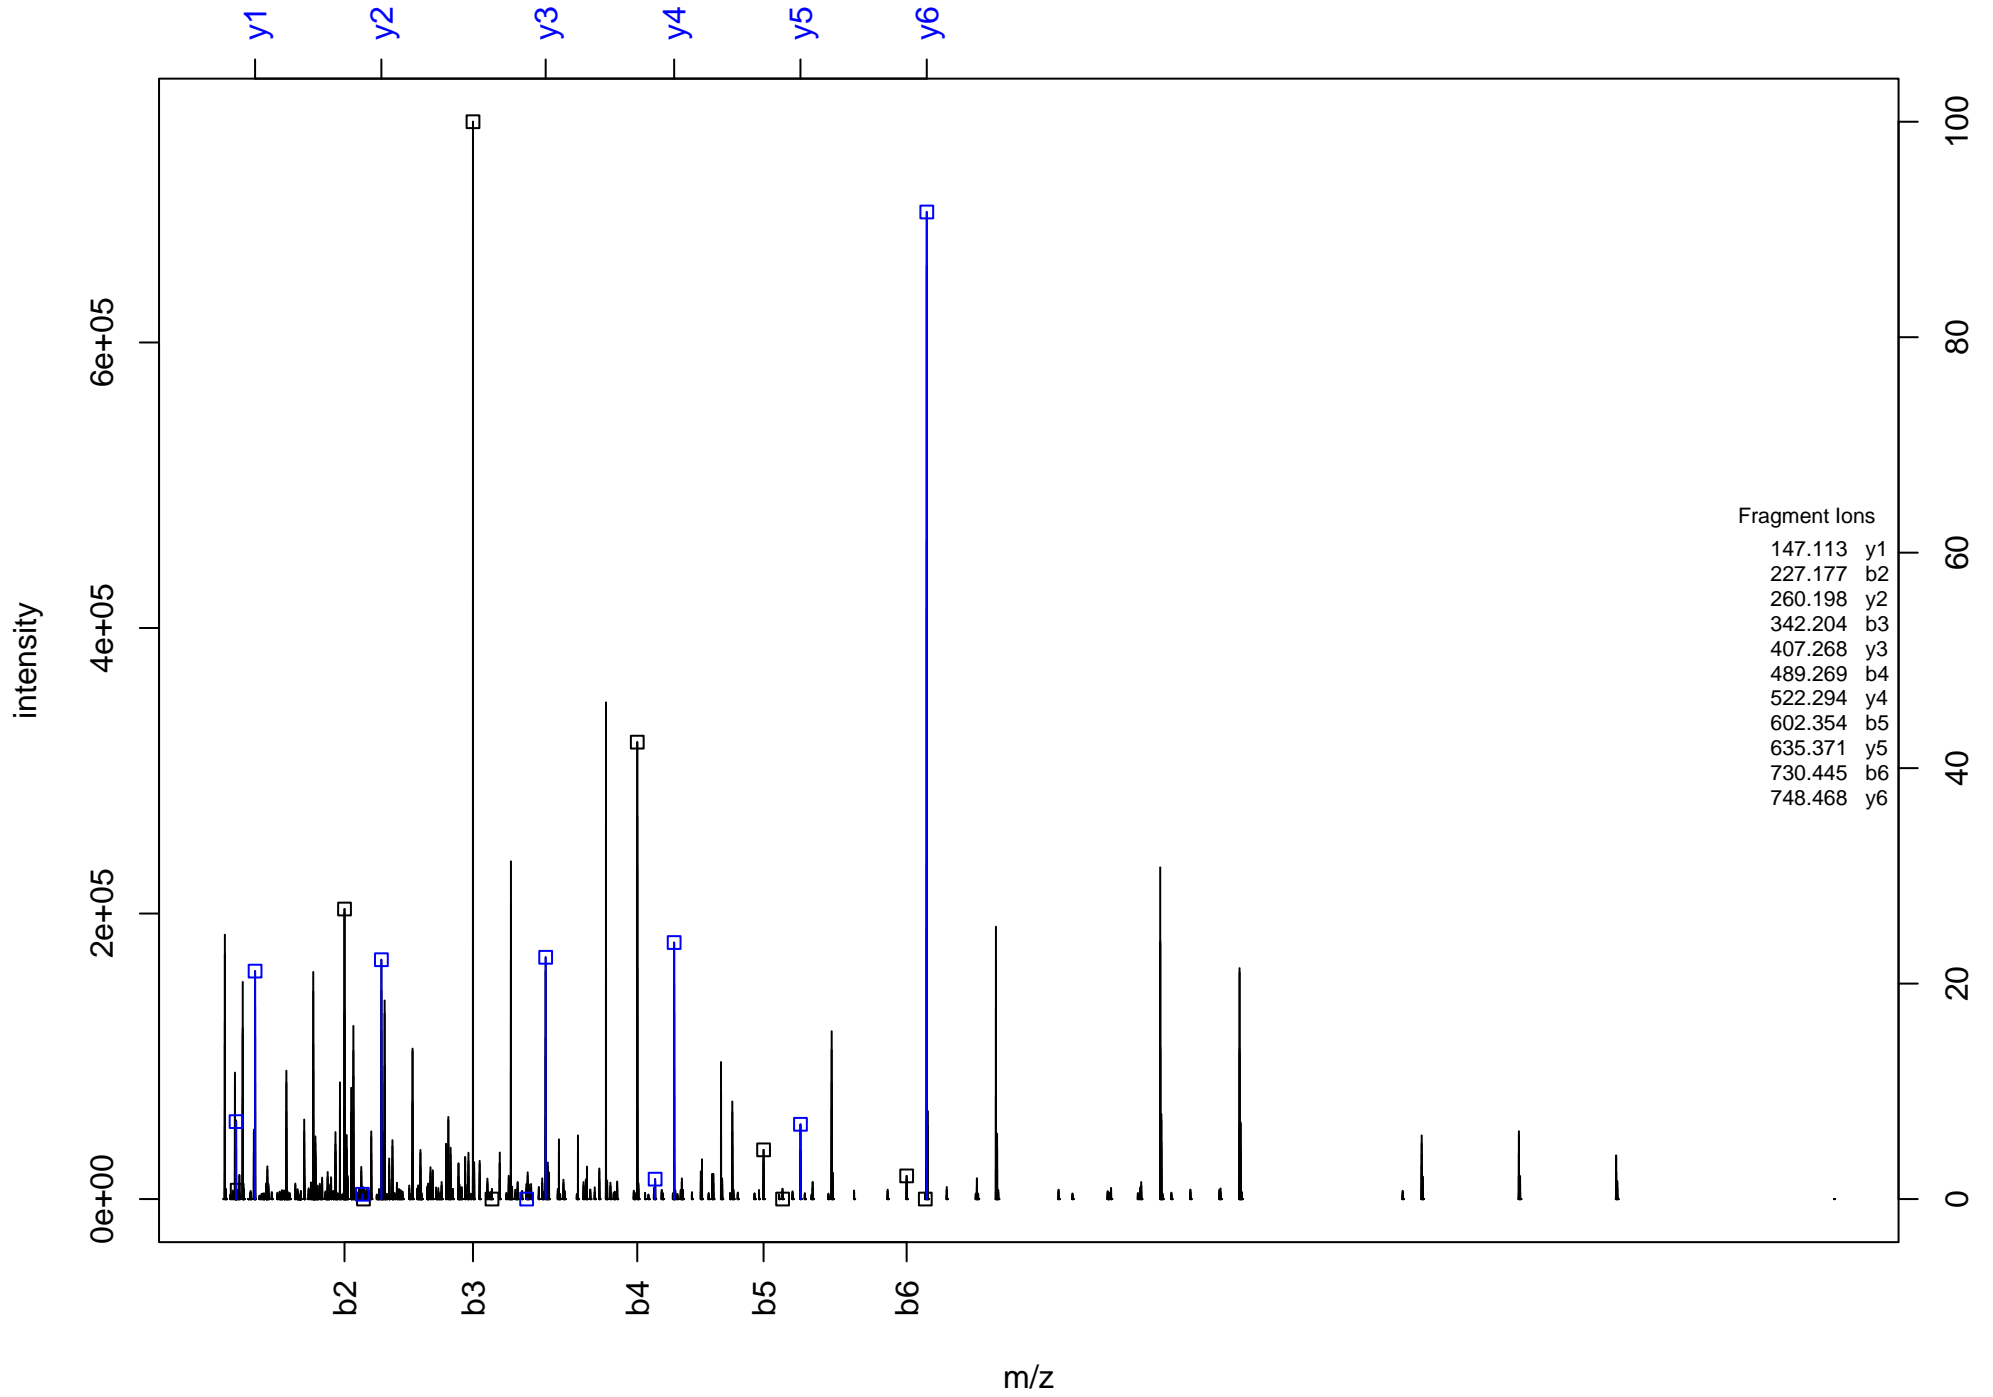

# SKLQ<sup>+</sup>EIDIFN<sup>+</sup>N<sup>+</sup>QLK

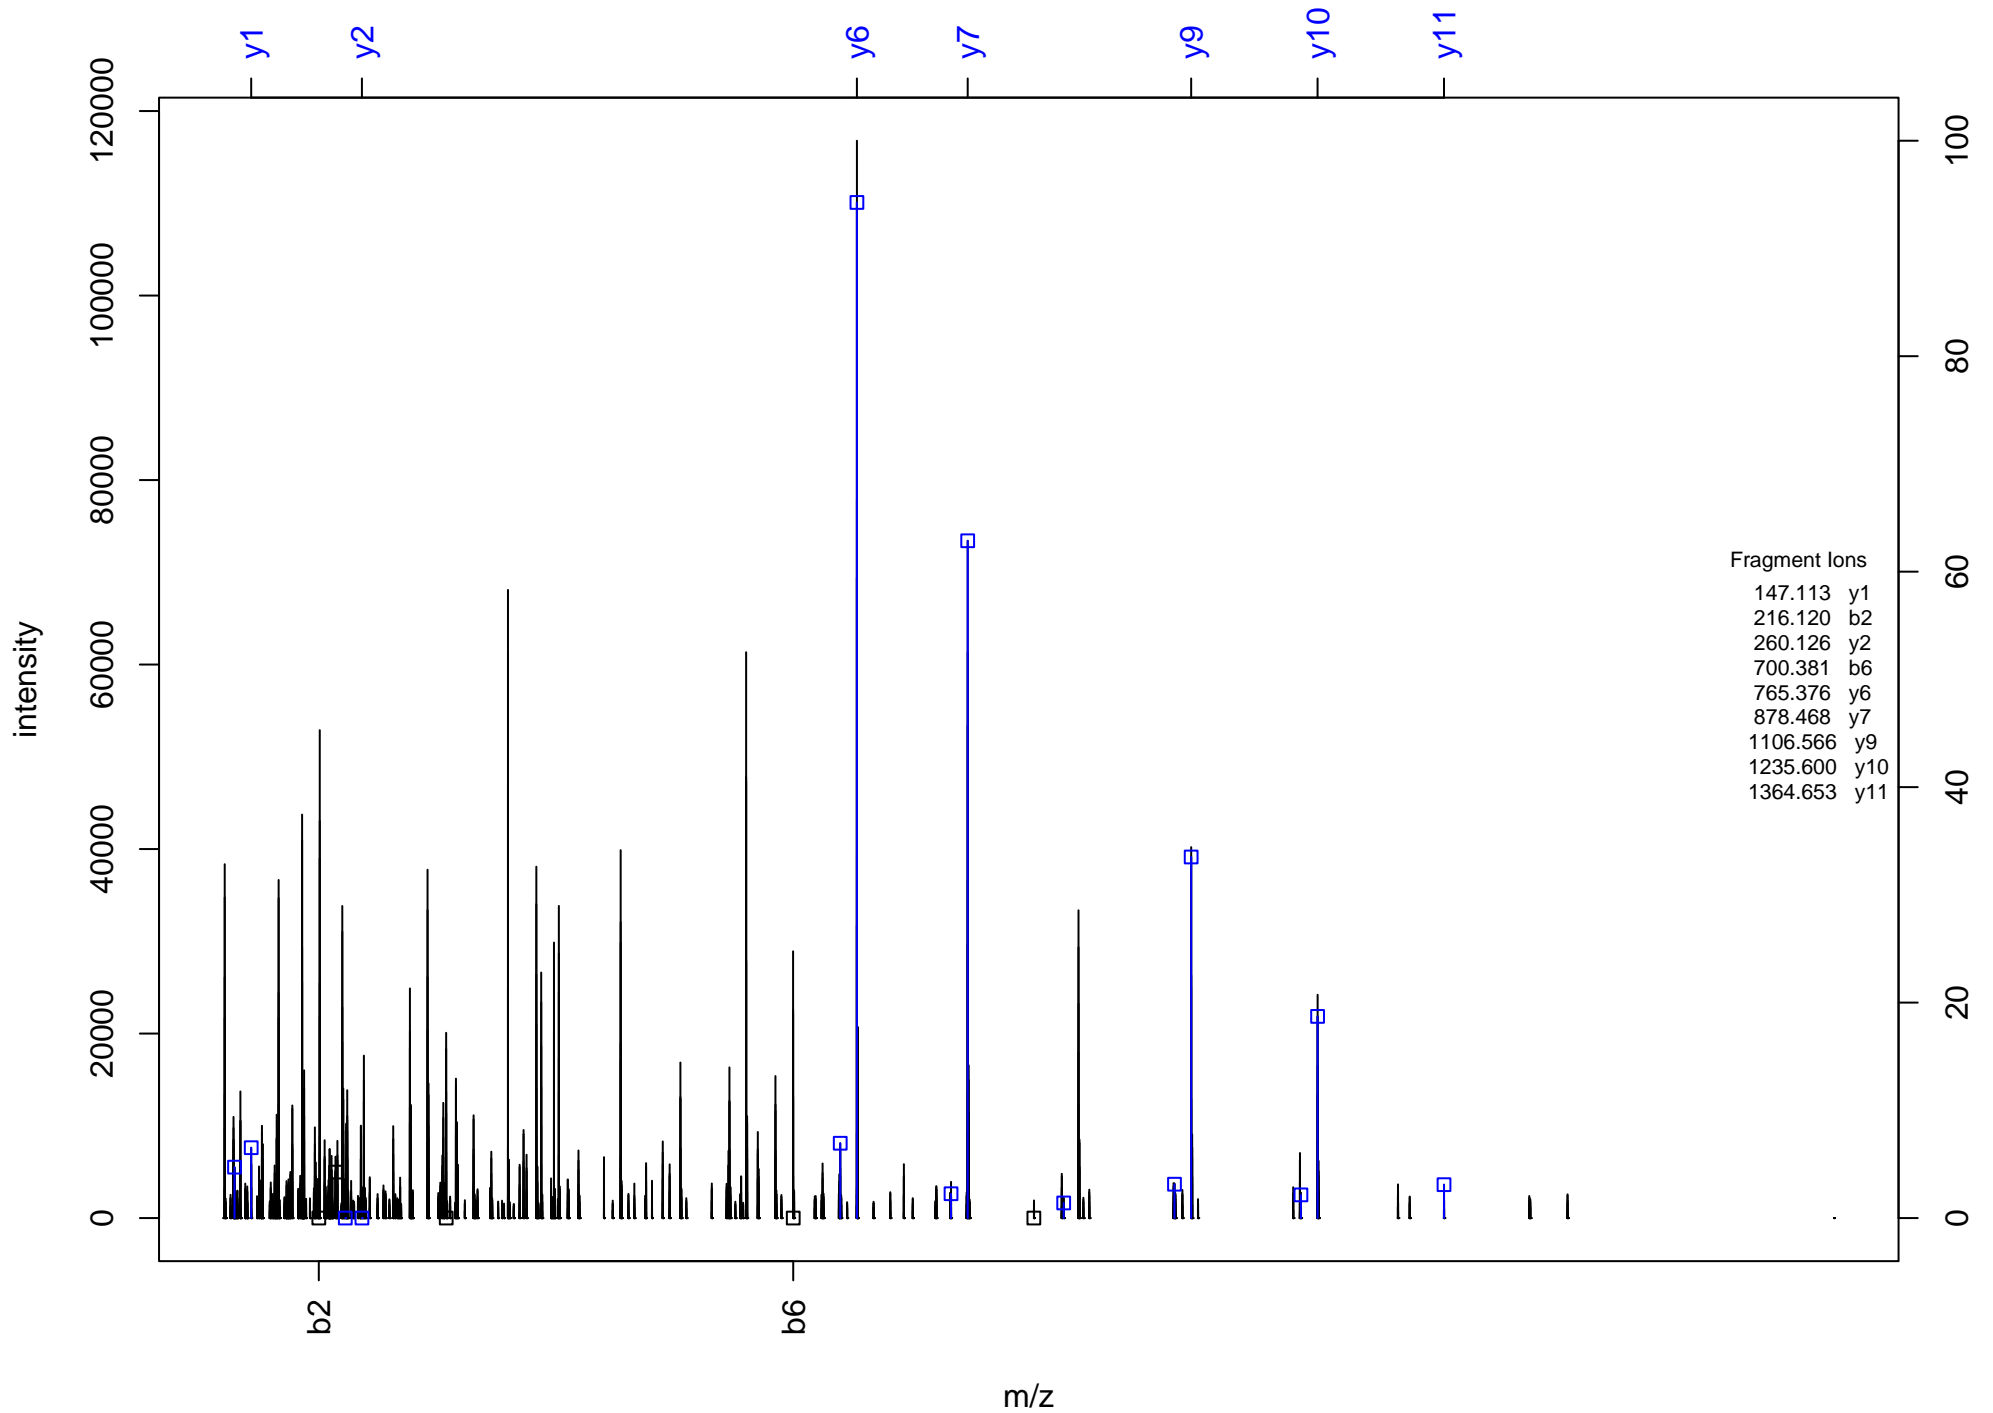

# SYTGLAPGYTYQFPEFR

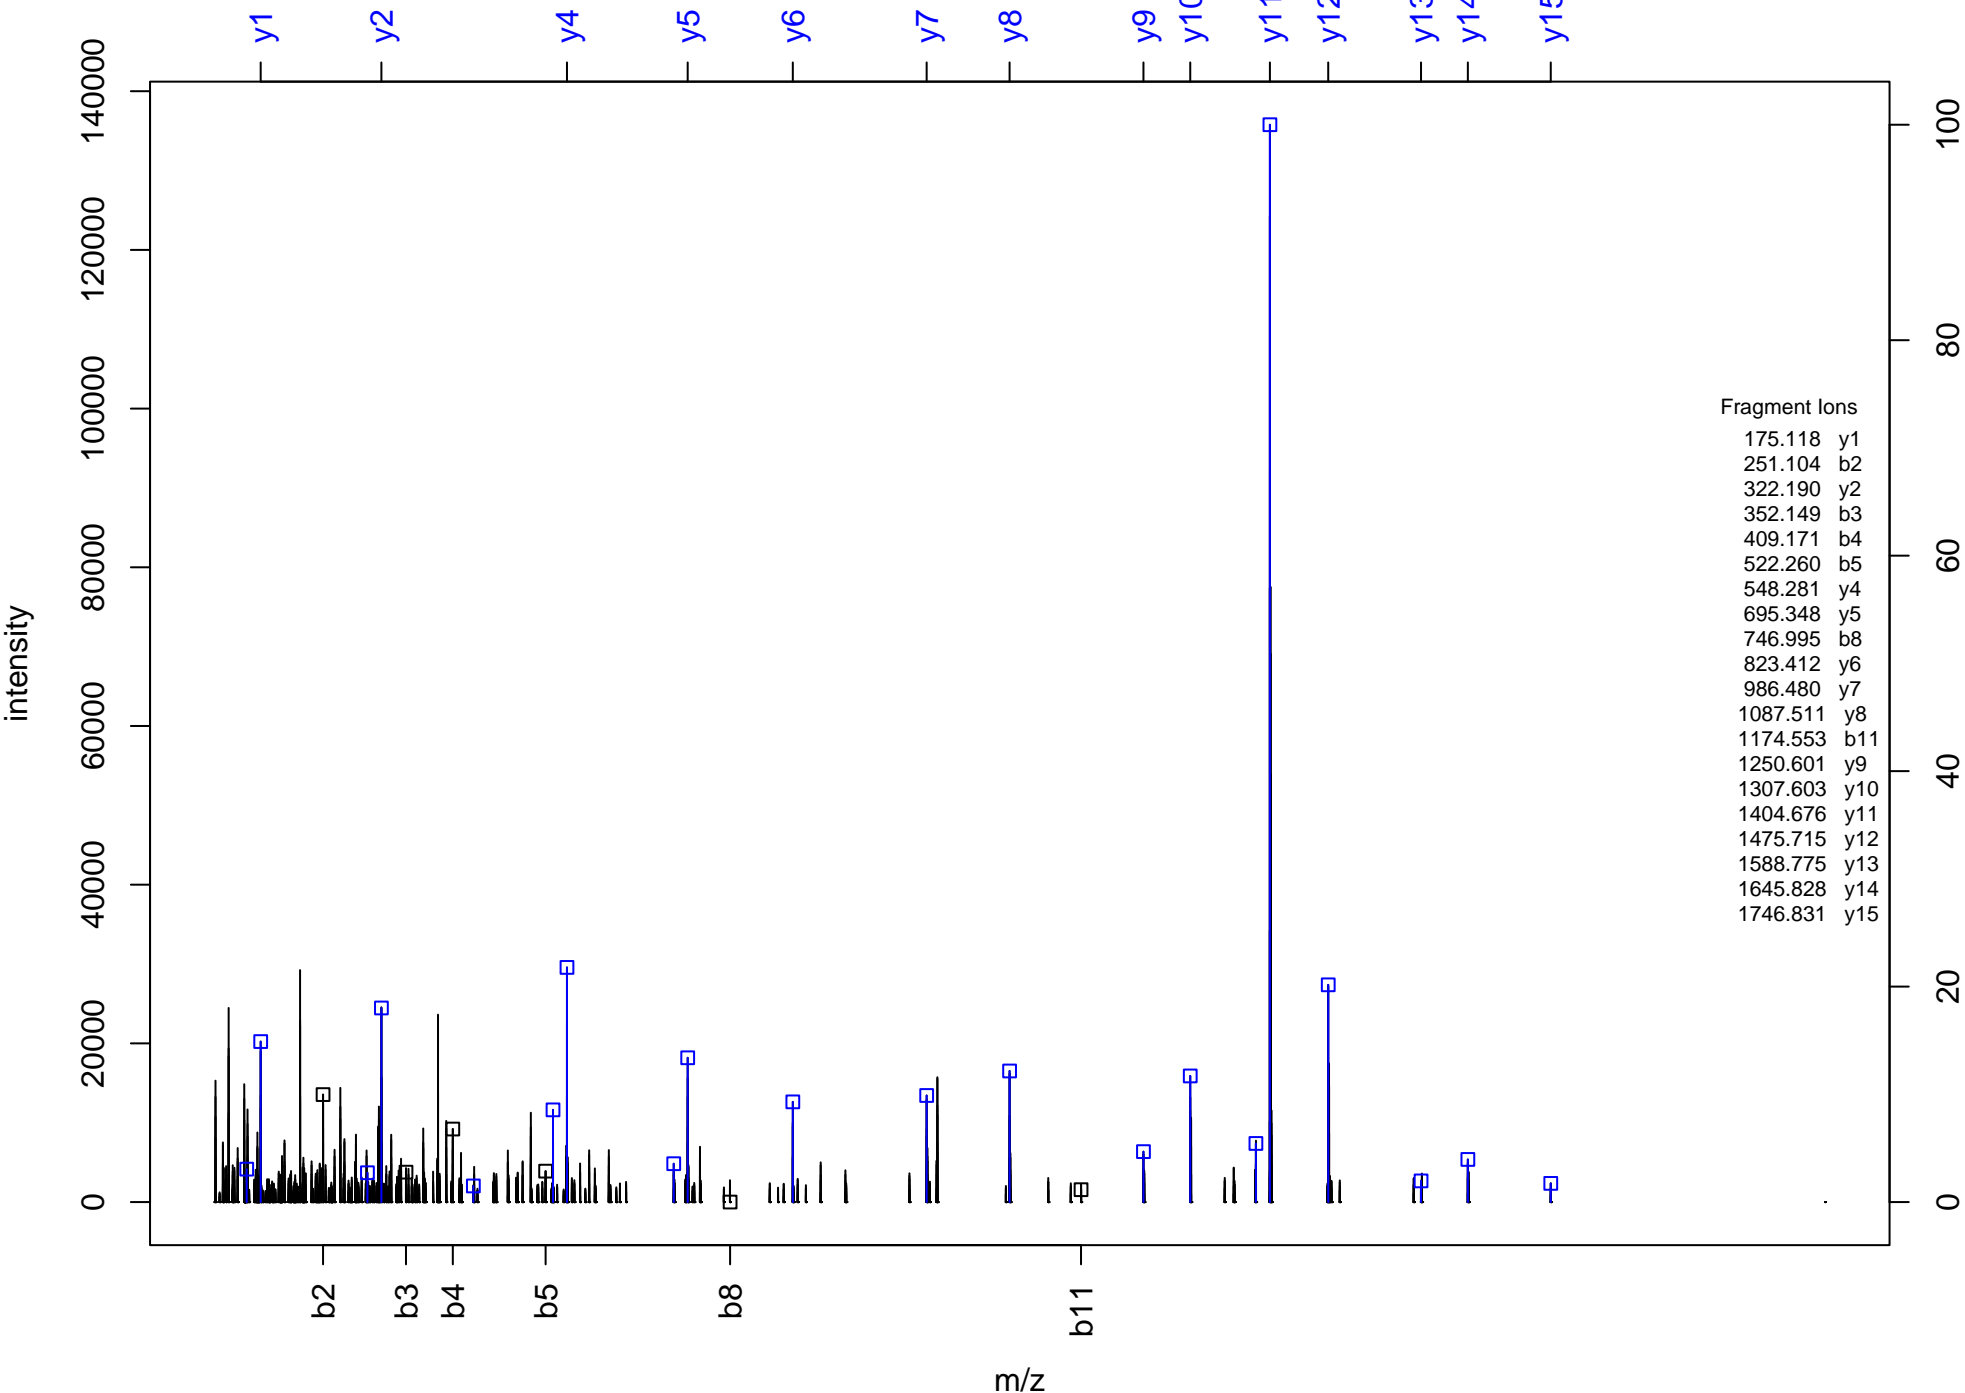

# AALSEELDAVDTGVGR

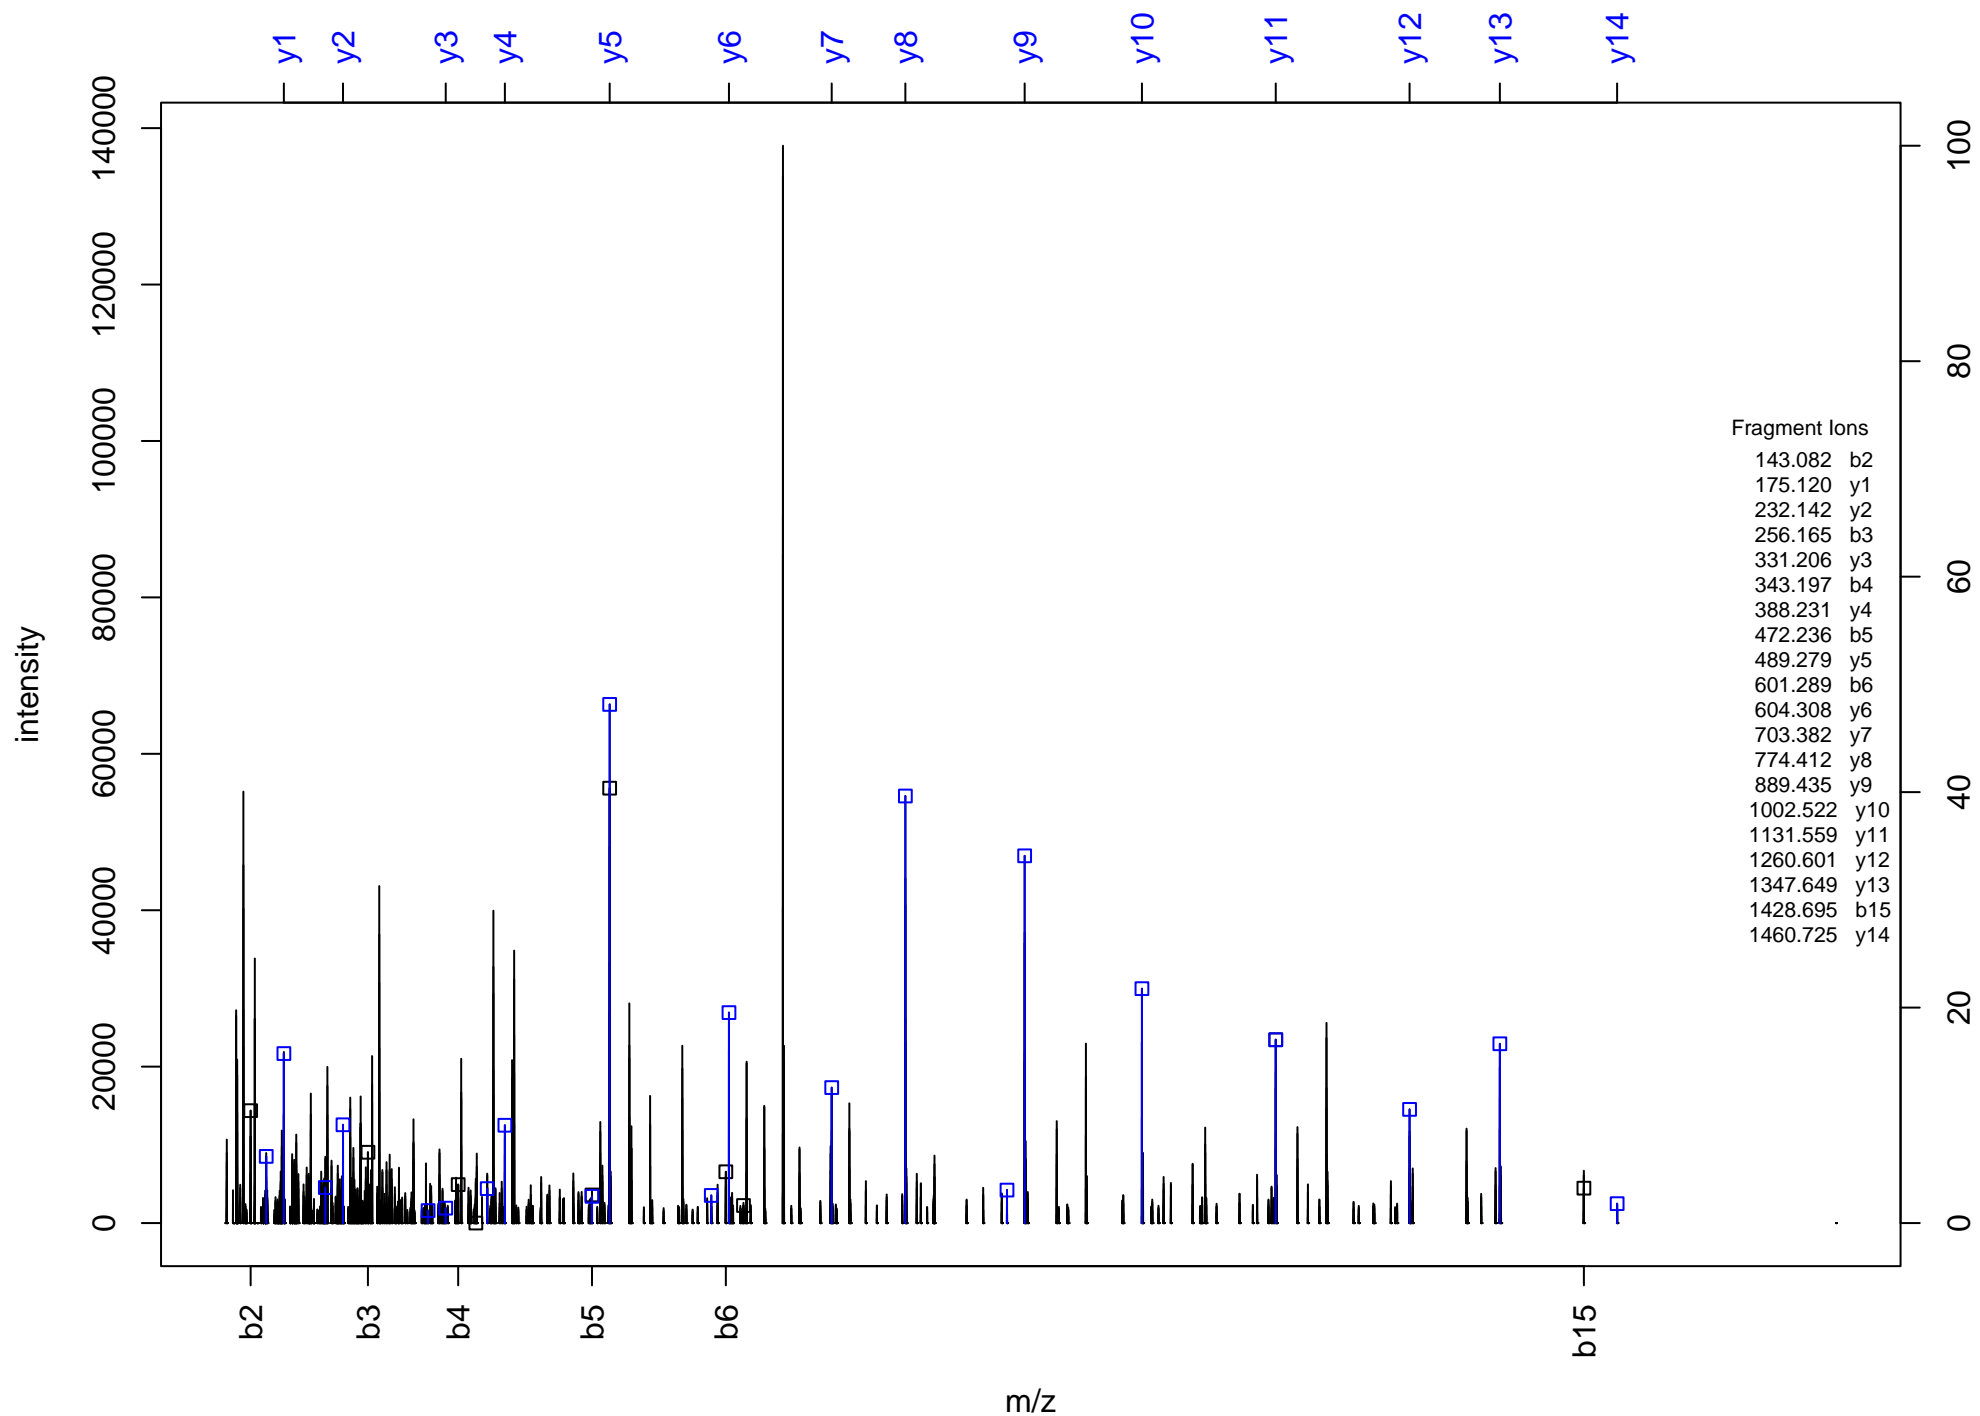



# FIYEAQQGVER

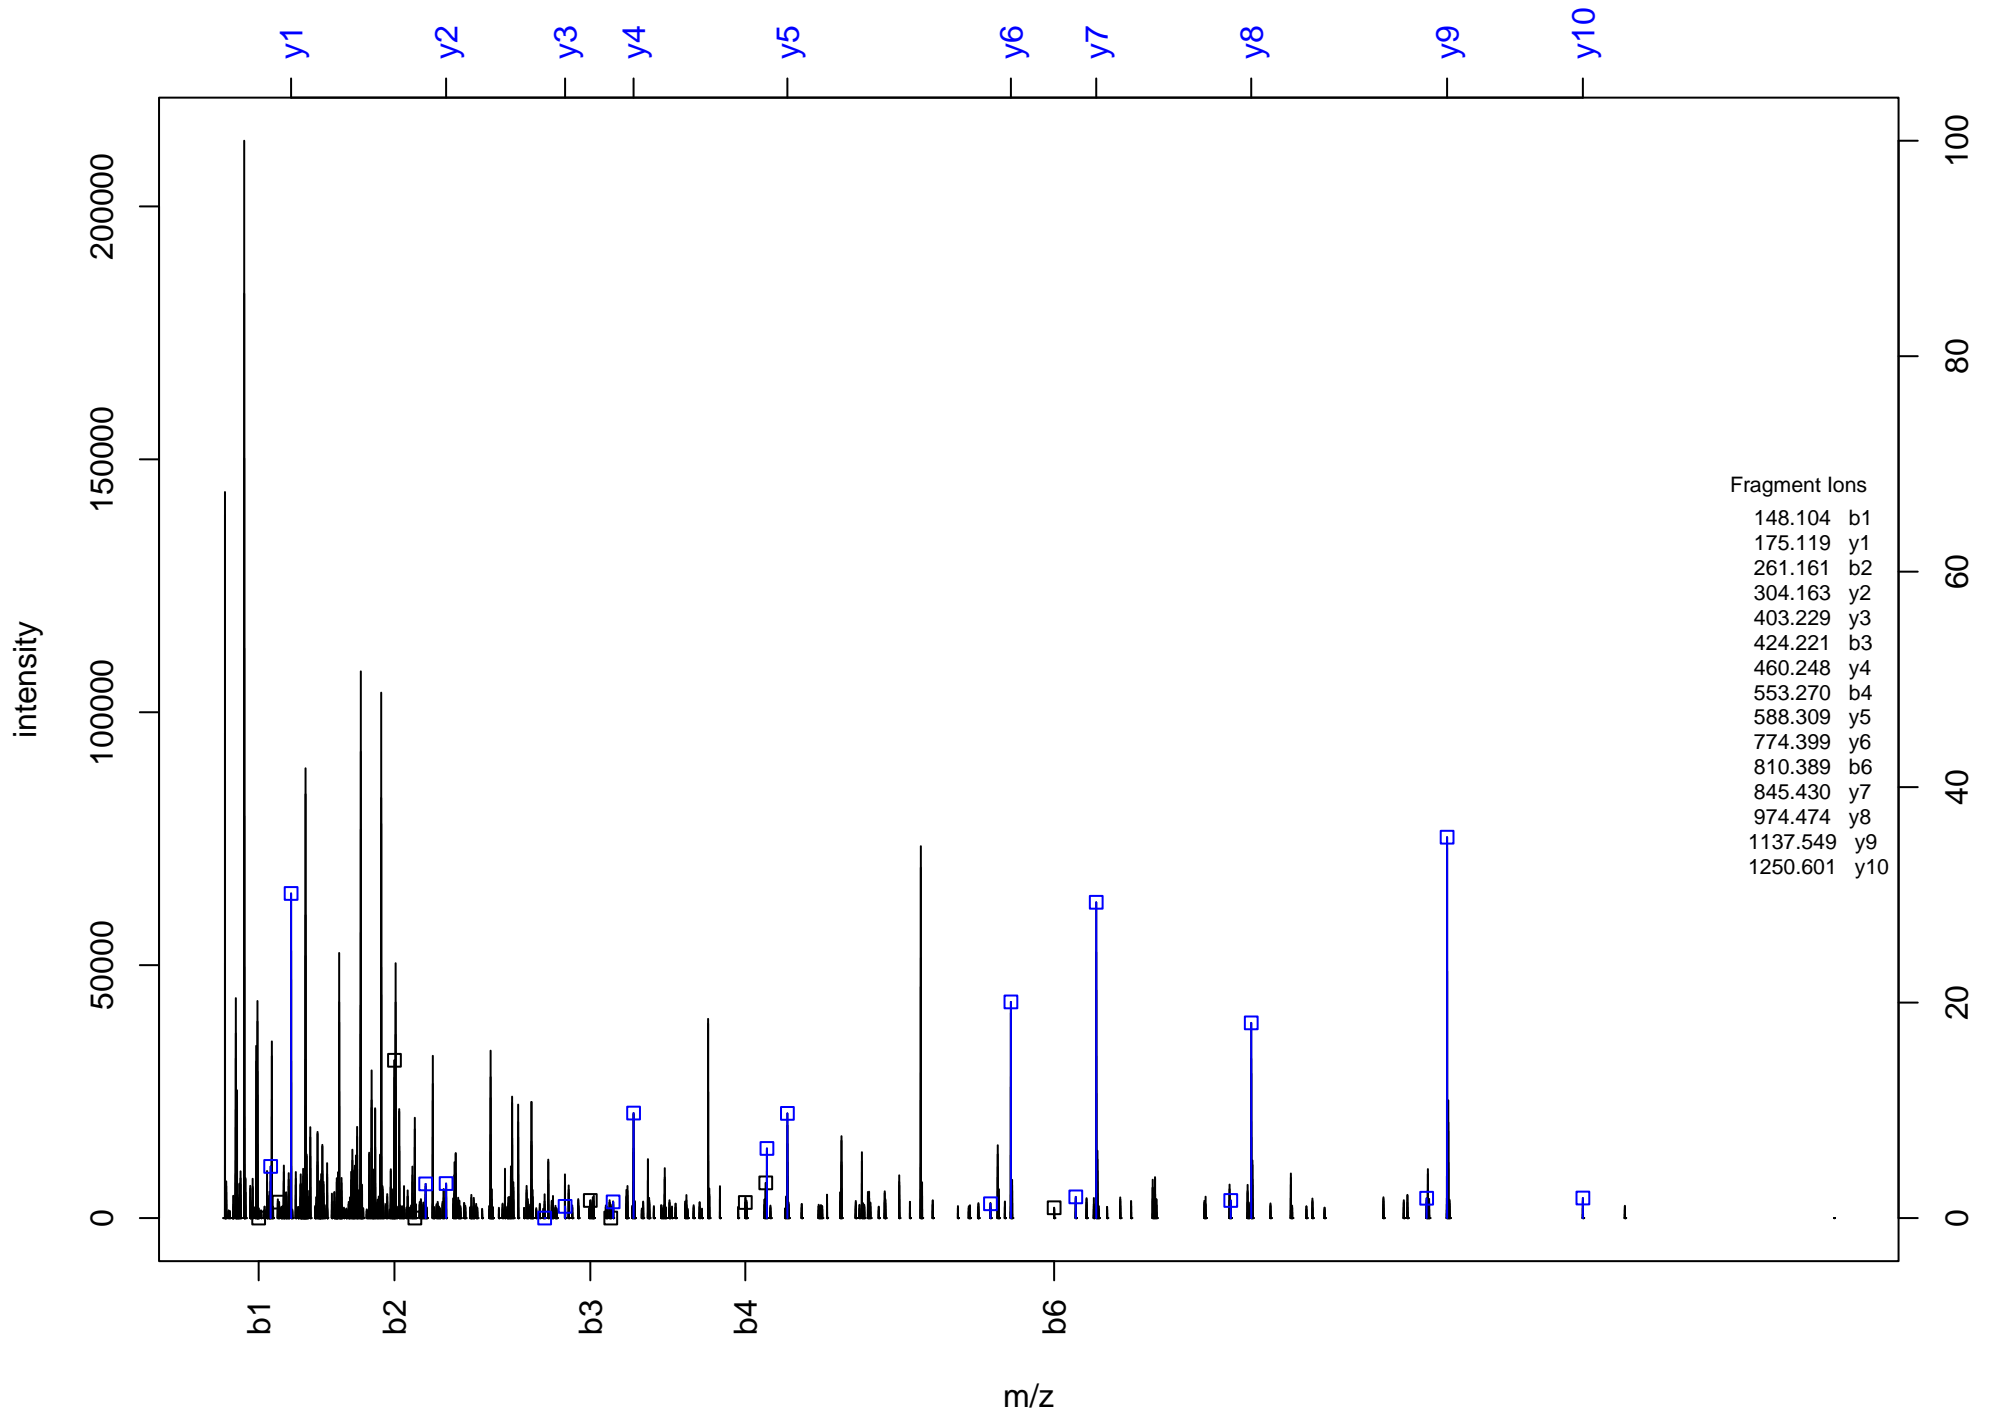

# IYDPQEGAVVVLPAESQQR

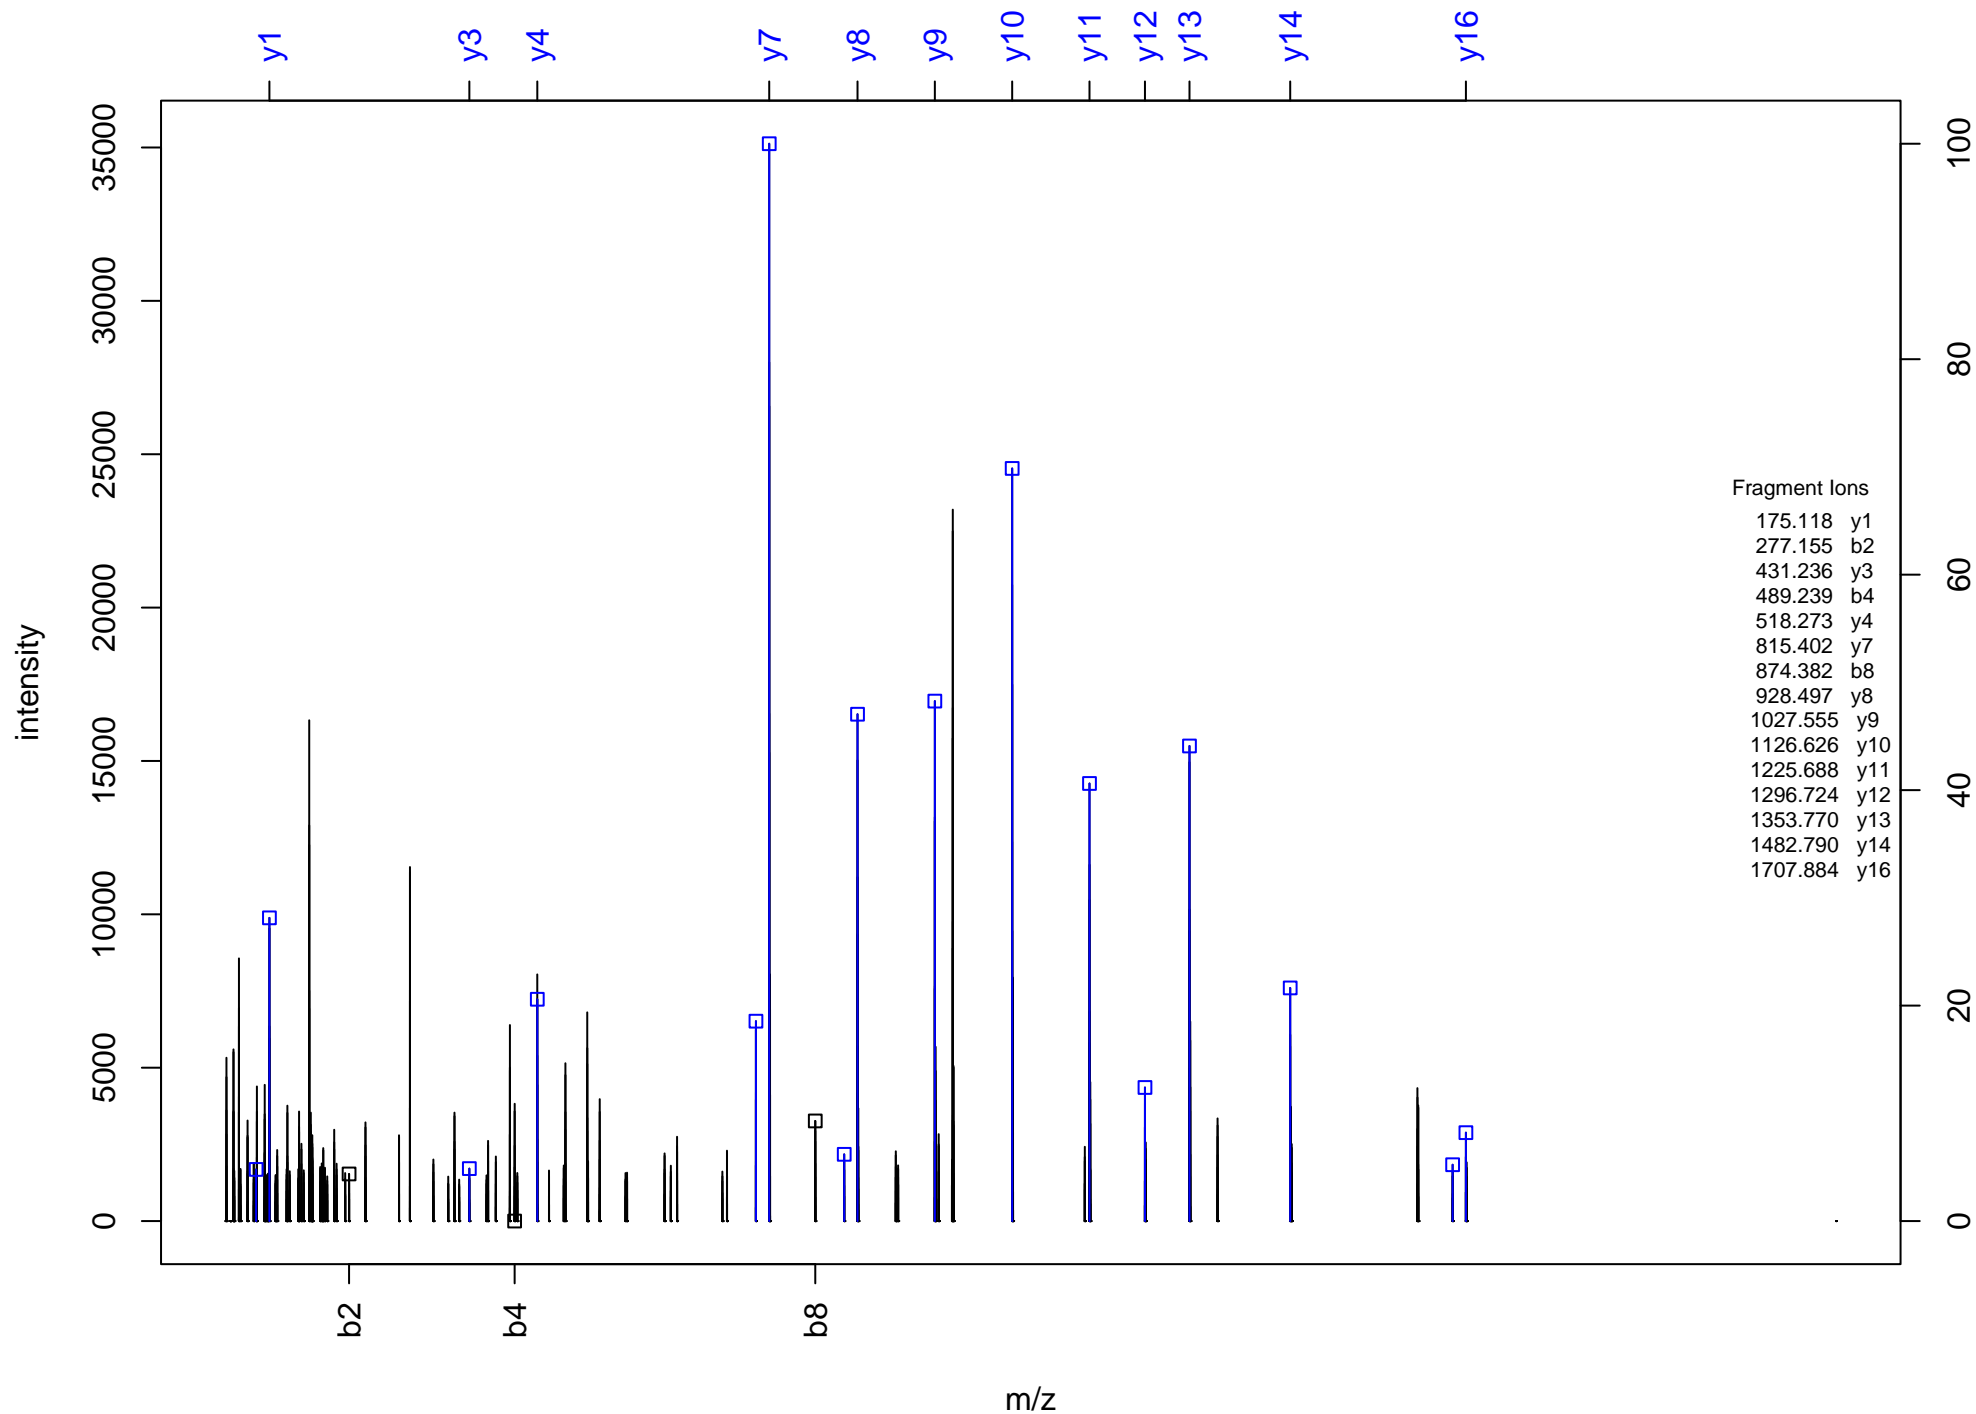

# EIINTIDGVGGLGIGEGAPEIVTGSR

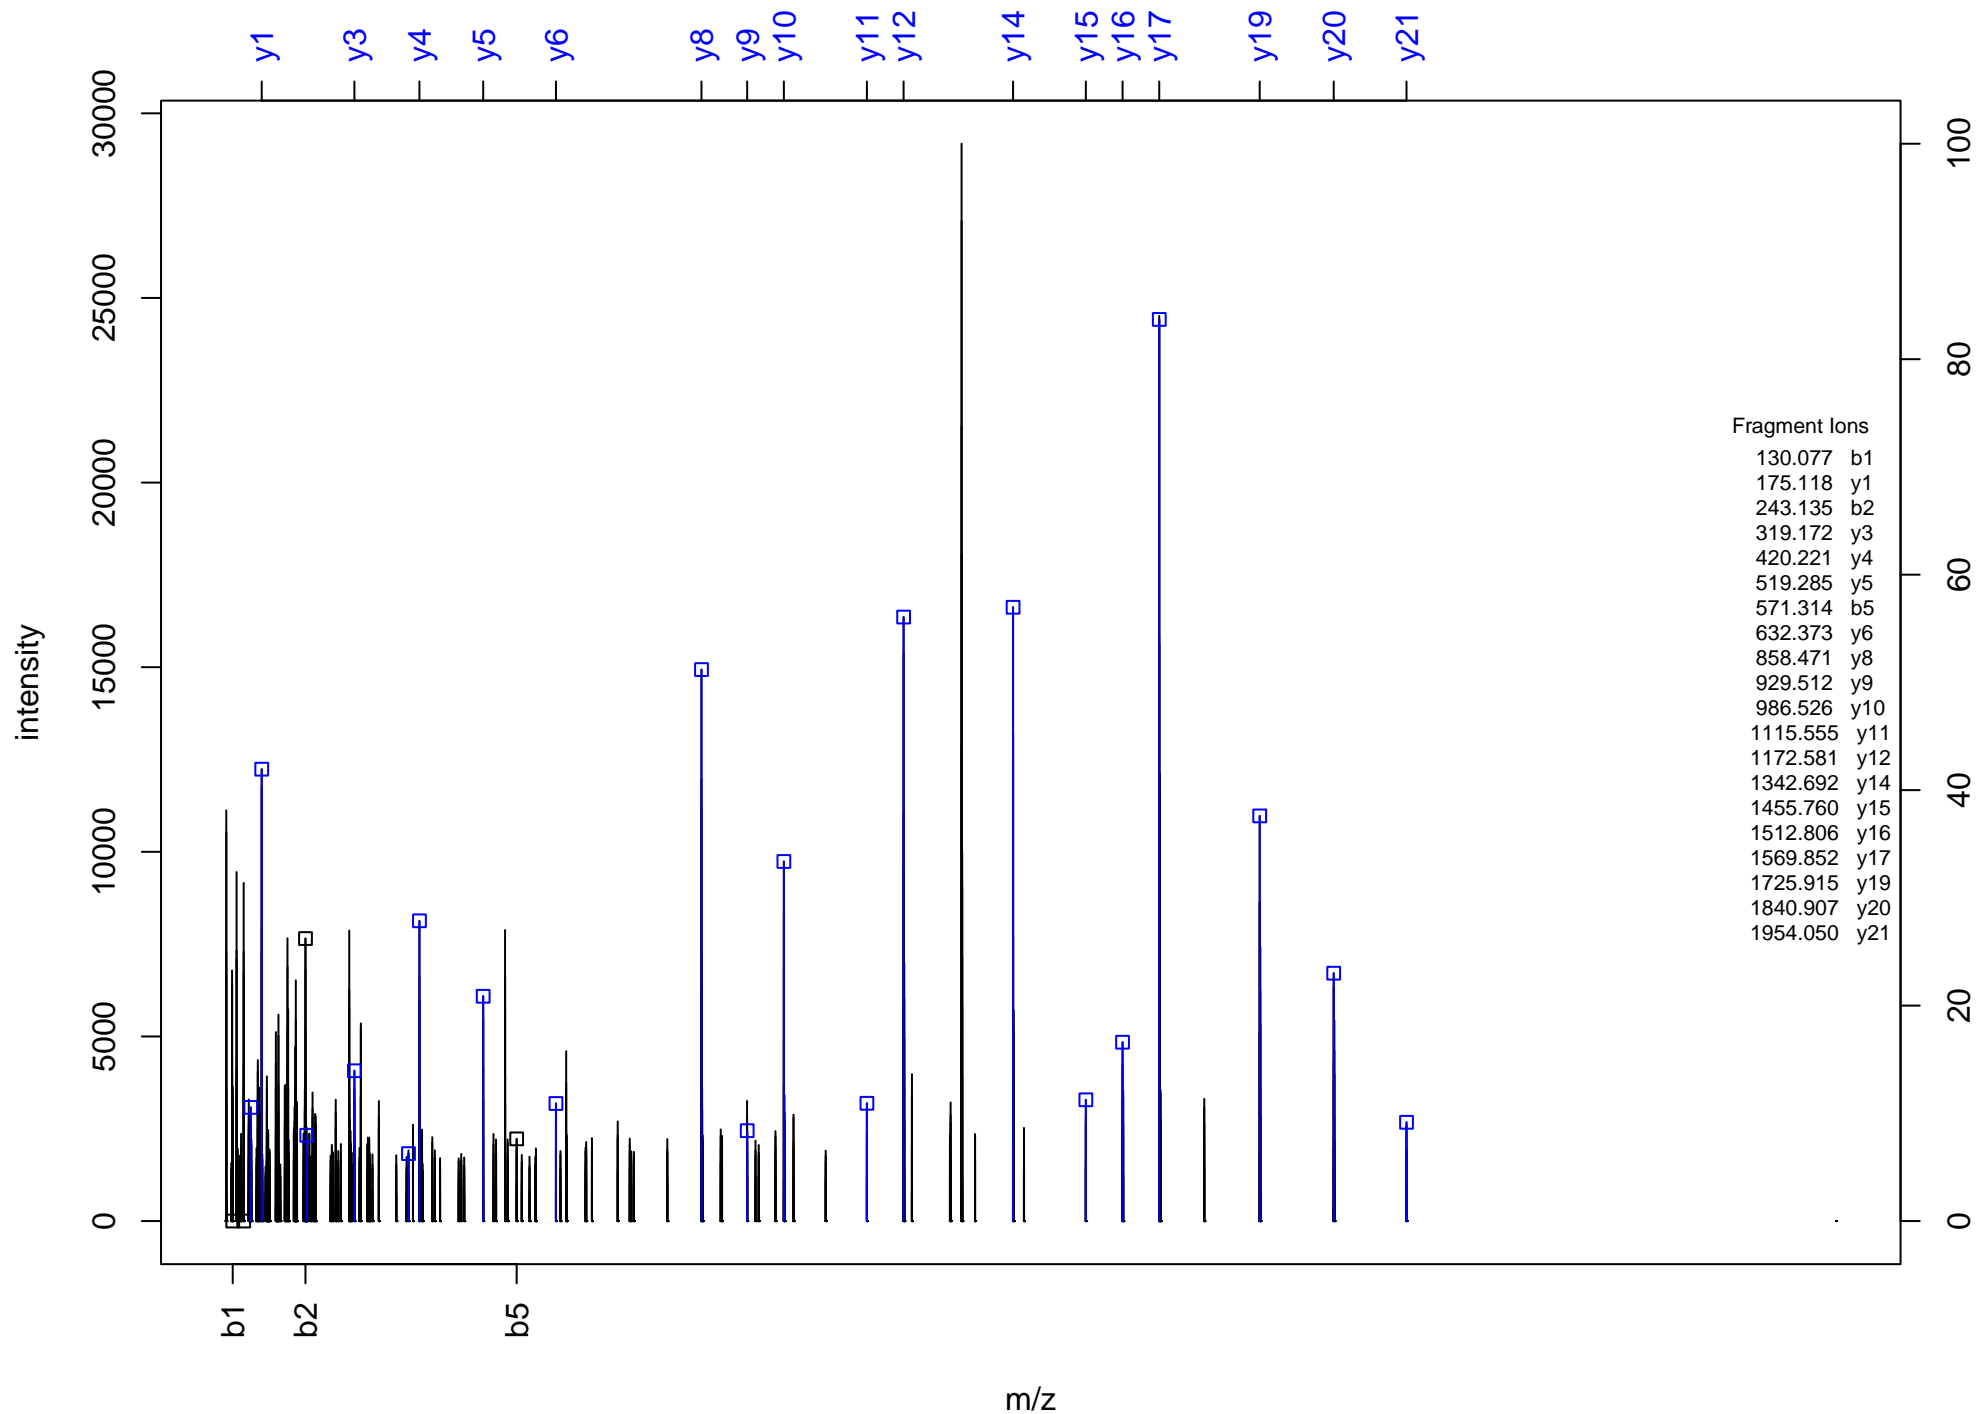

# LN<sup>^</sup>SLN<sup>^</sup>LTGN<sup>^</sup>MIGSLPKEVR

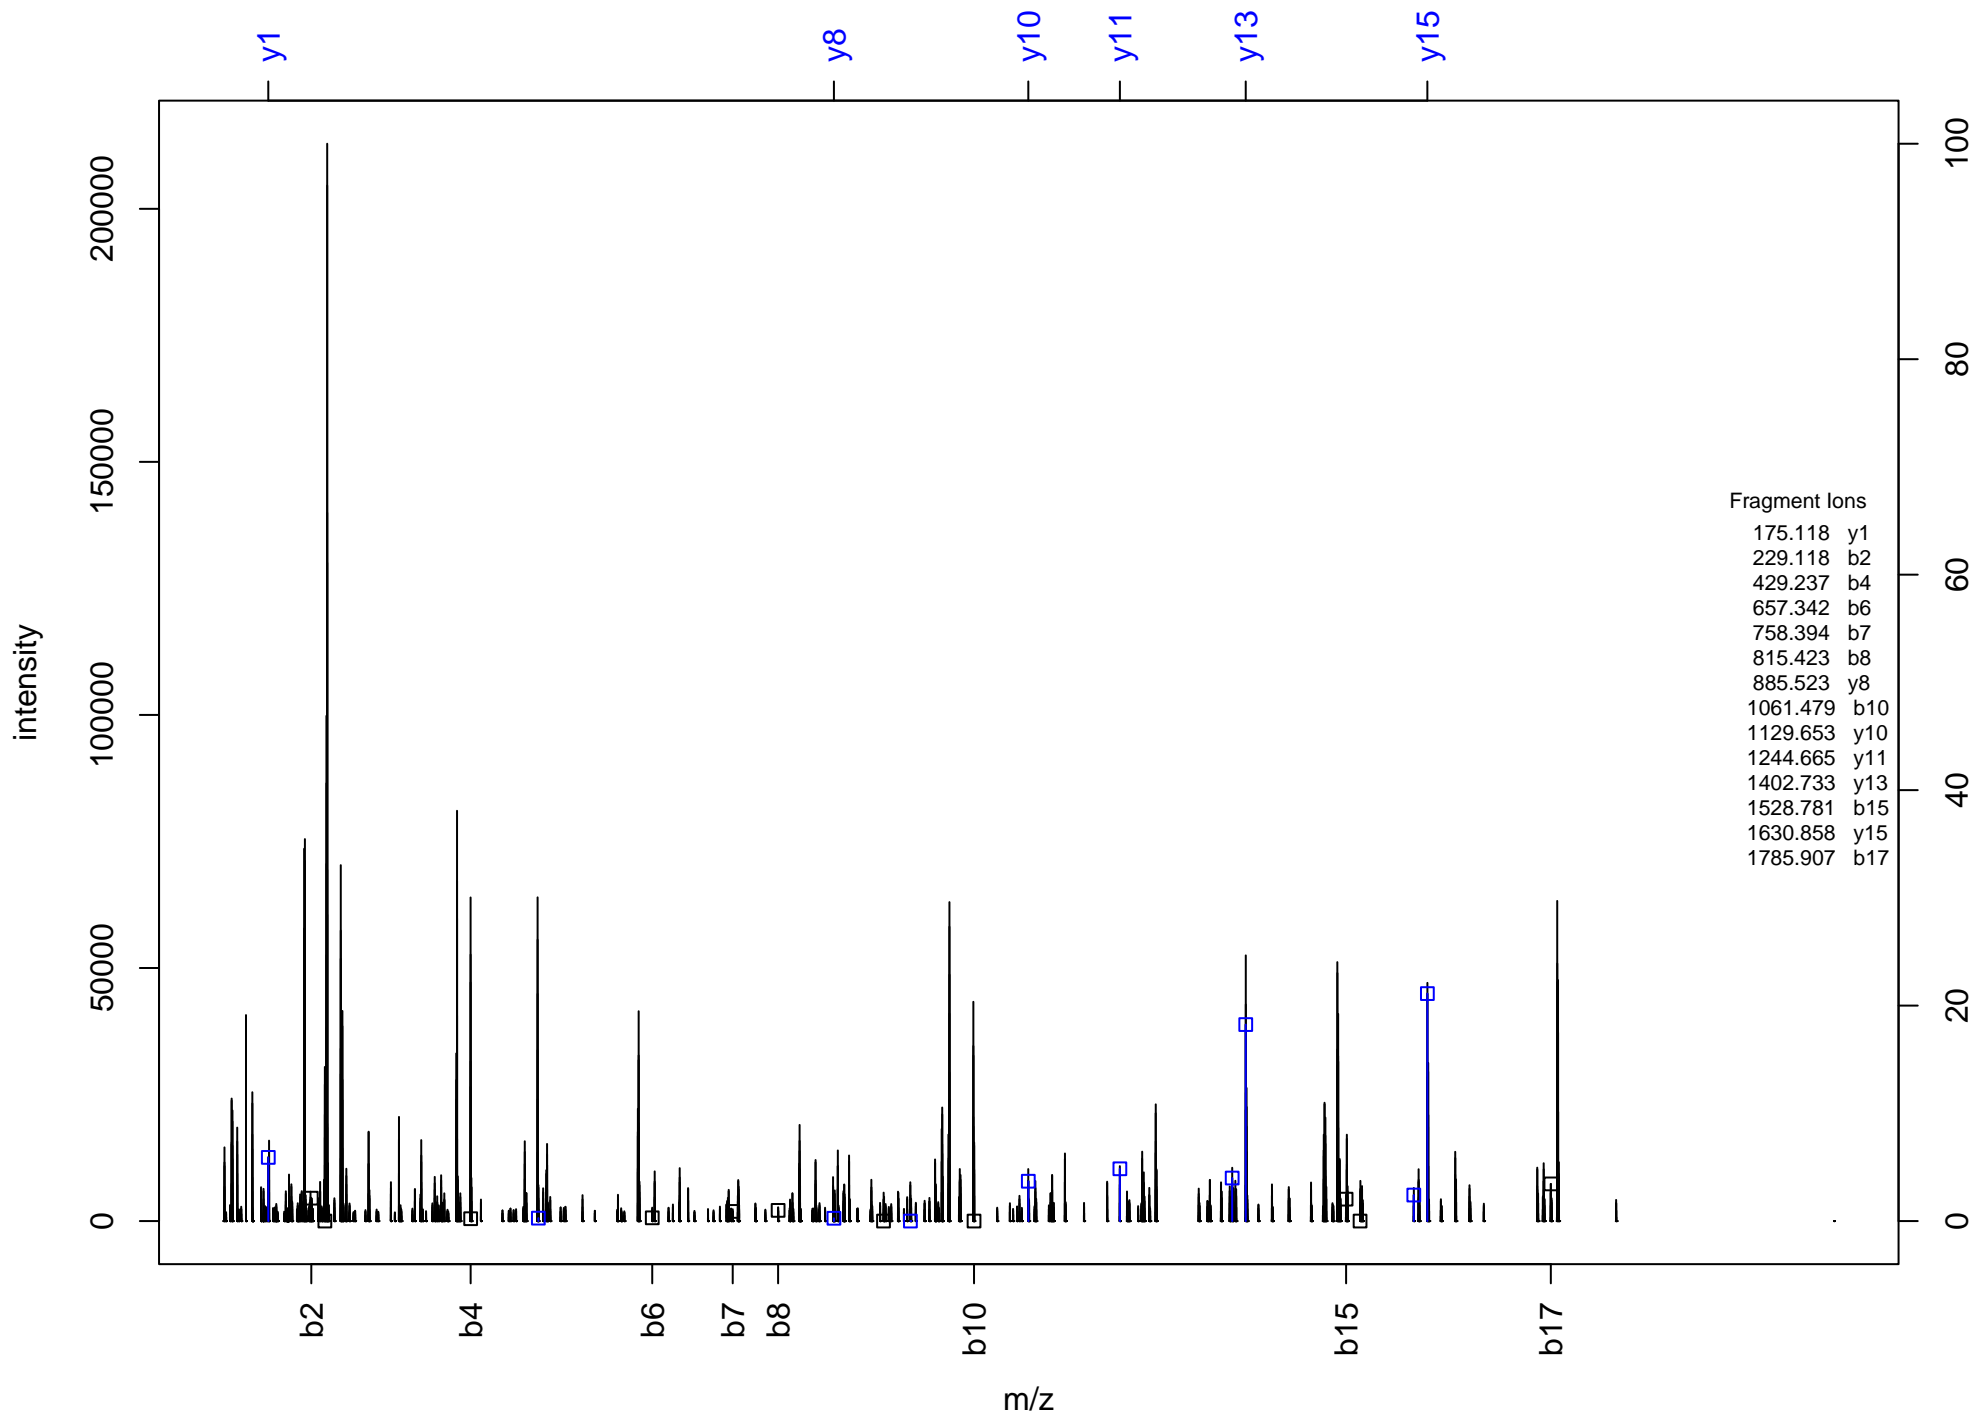

# DRIELLQDAEPLDFN^AETFTDESLEPESGR

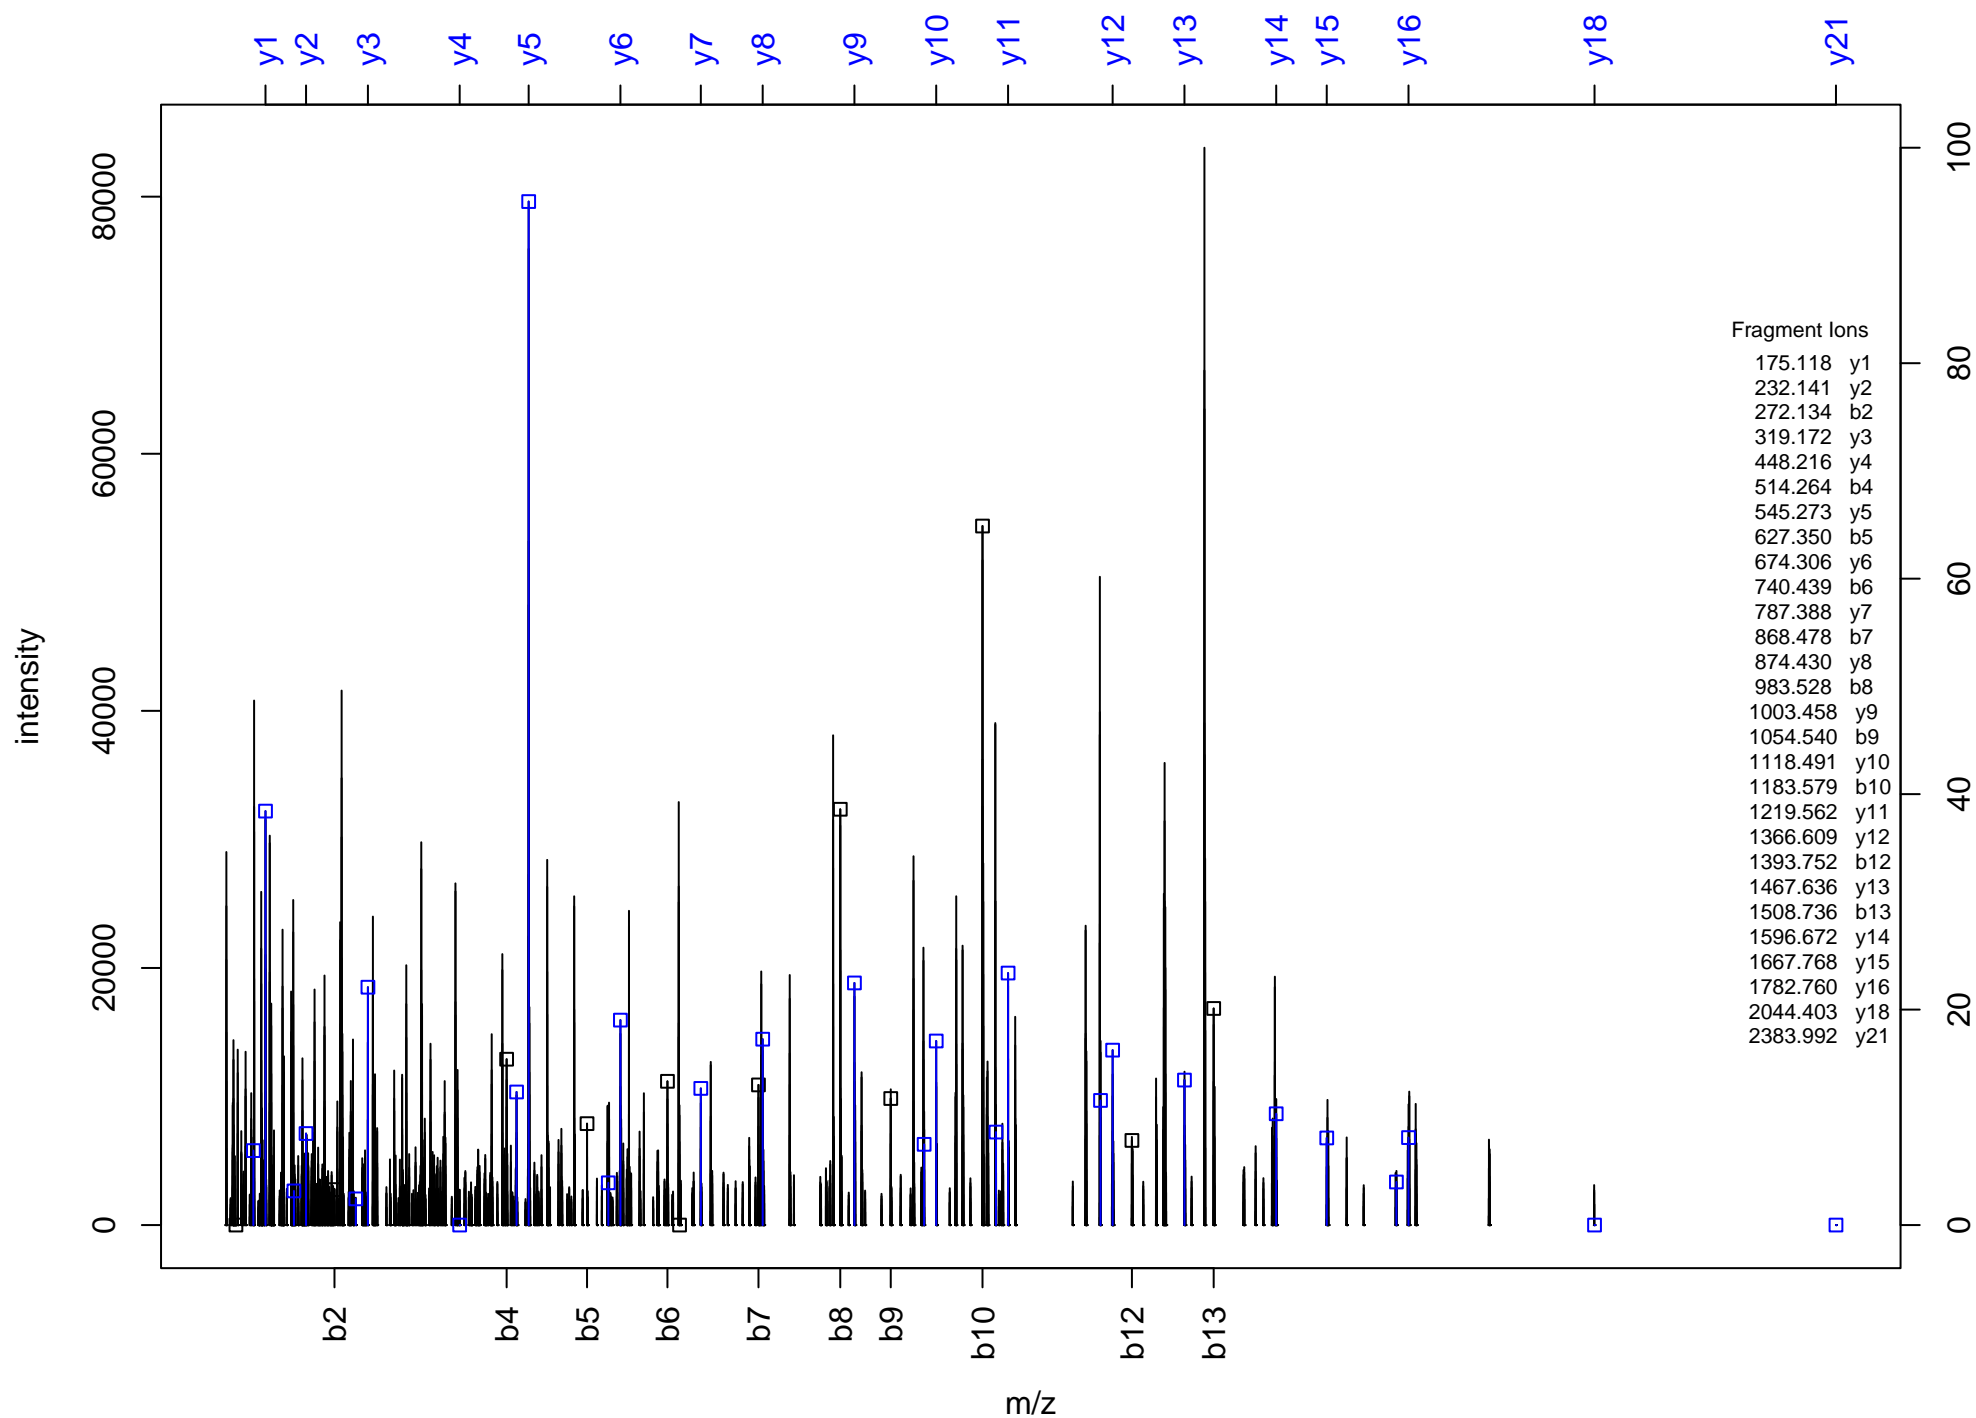

# EQM\*IN^DRIGYKPQLKSN^N^R

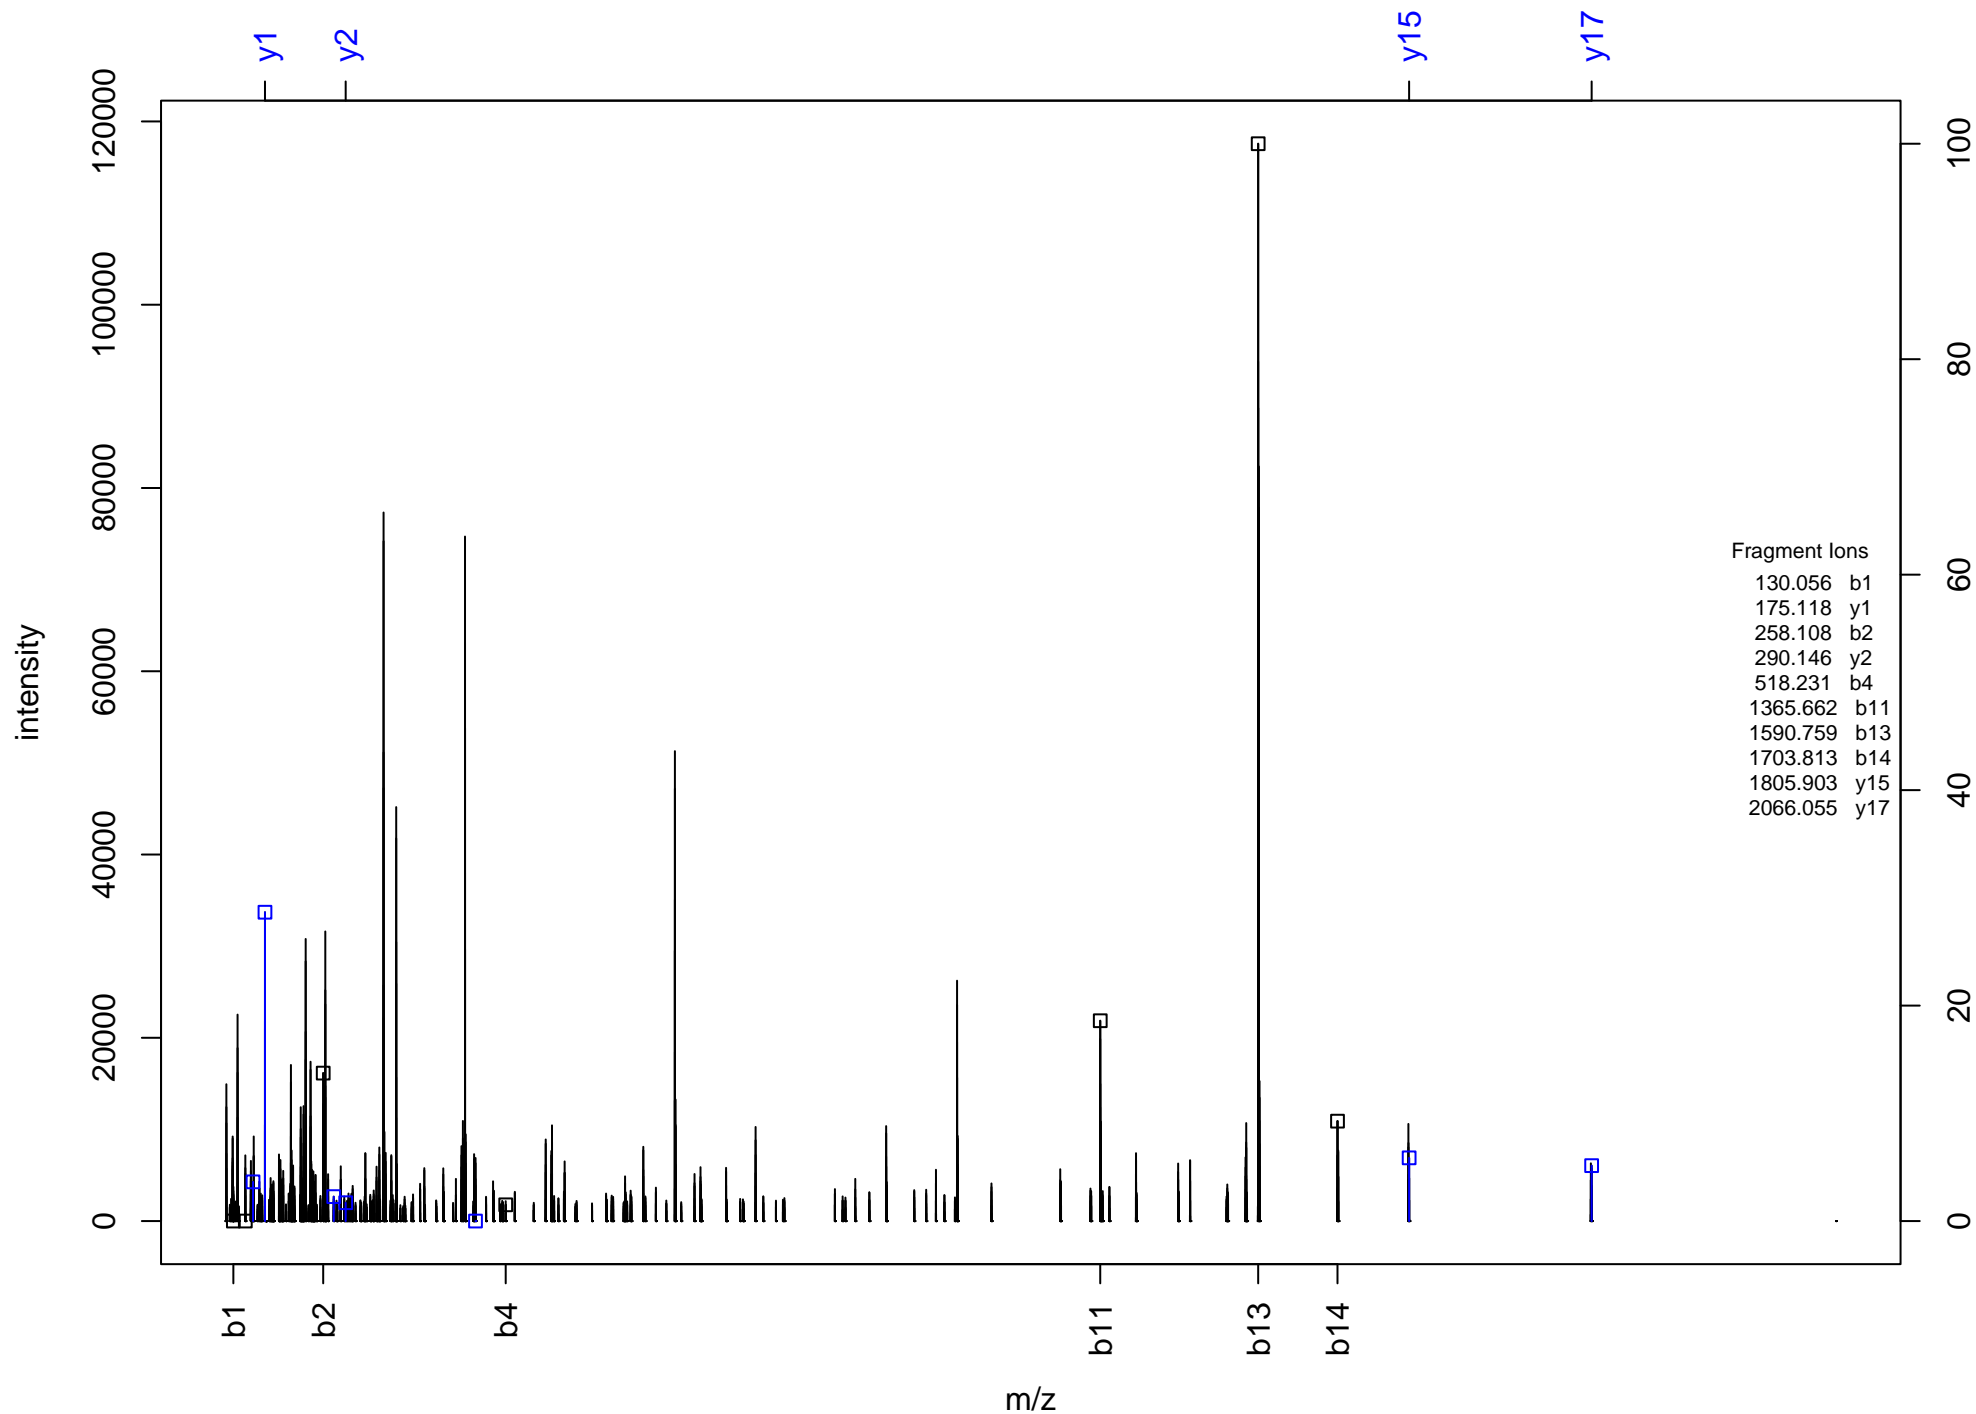

# TTGHIFYEPDAFDDVDPEDPDDDLDI

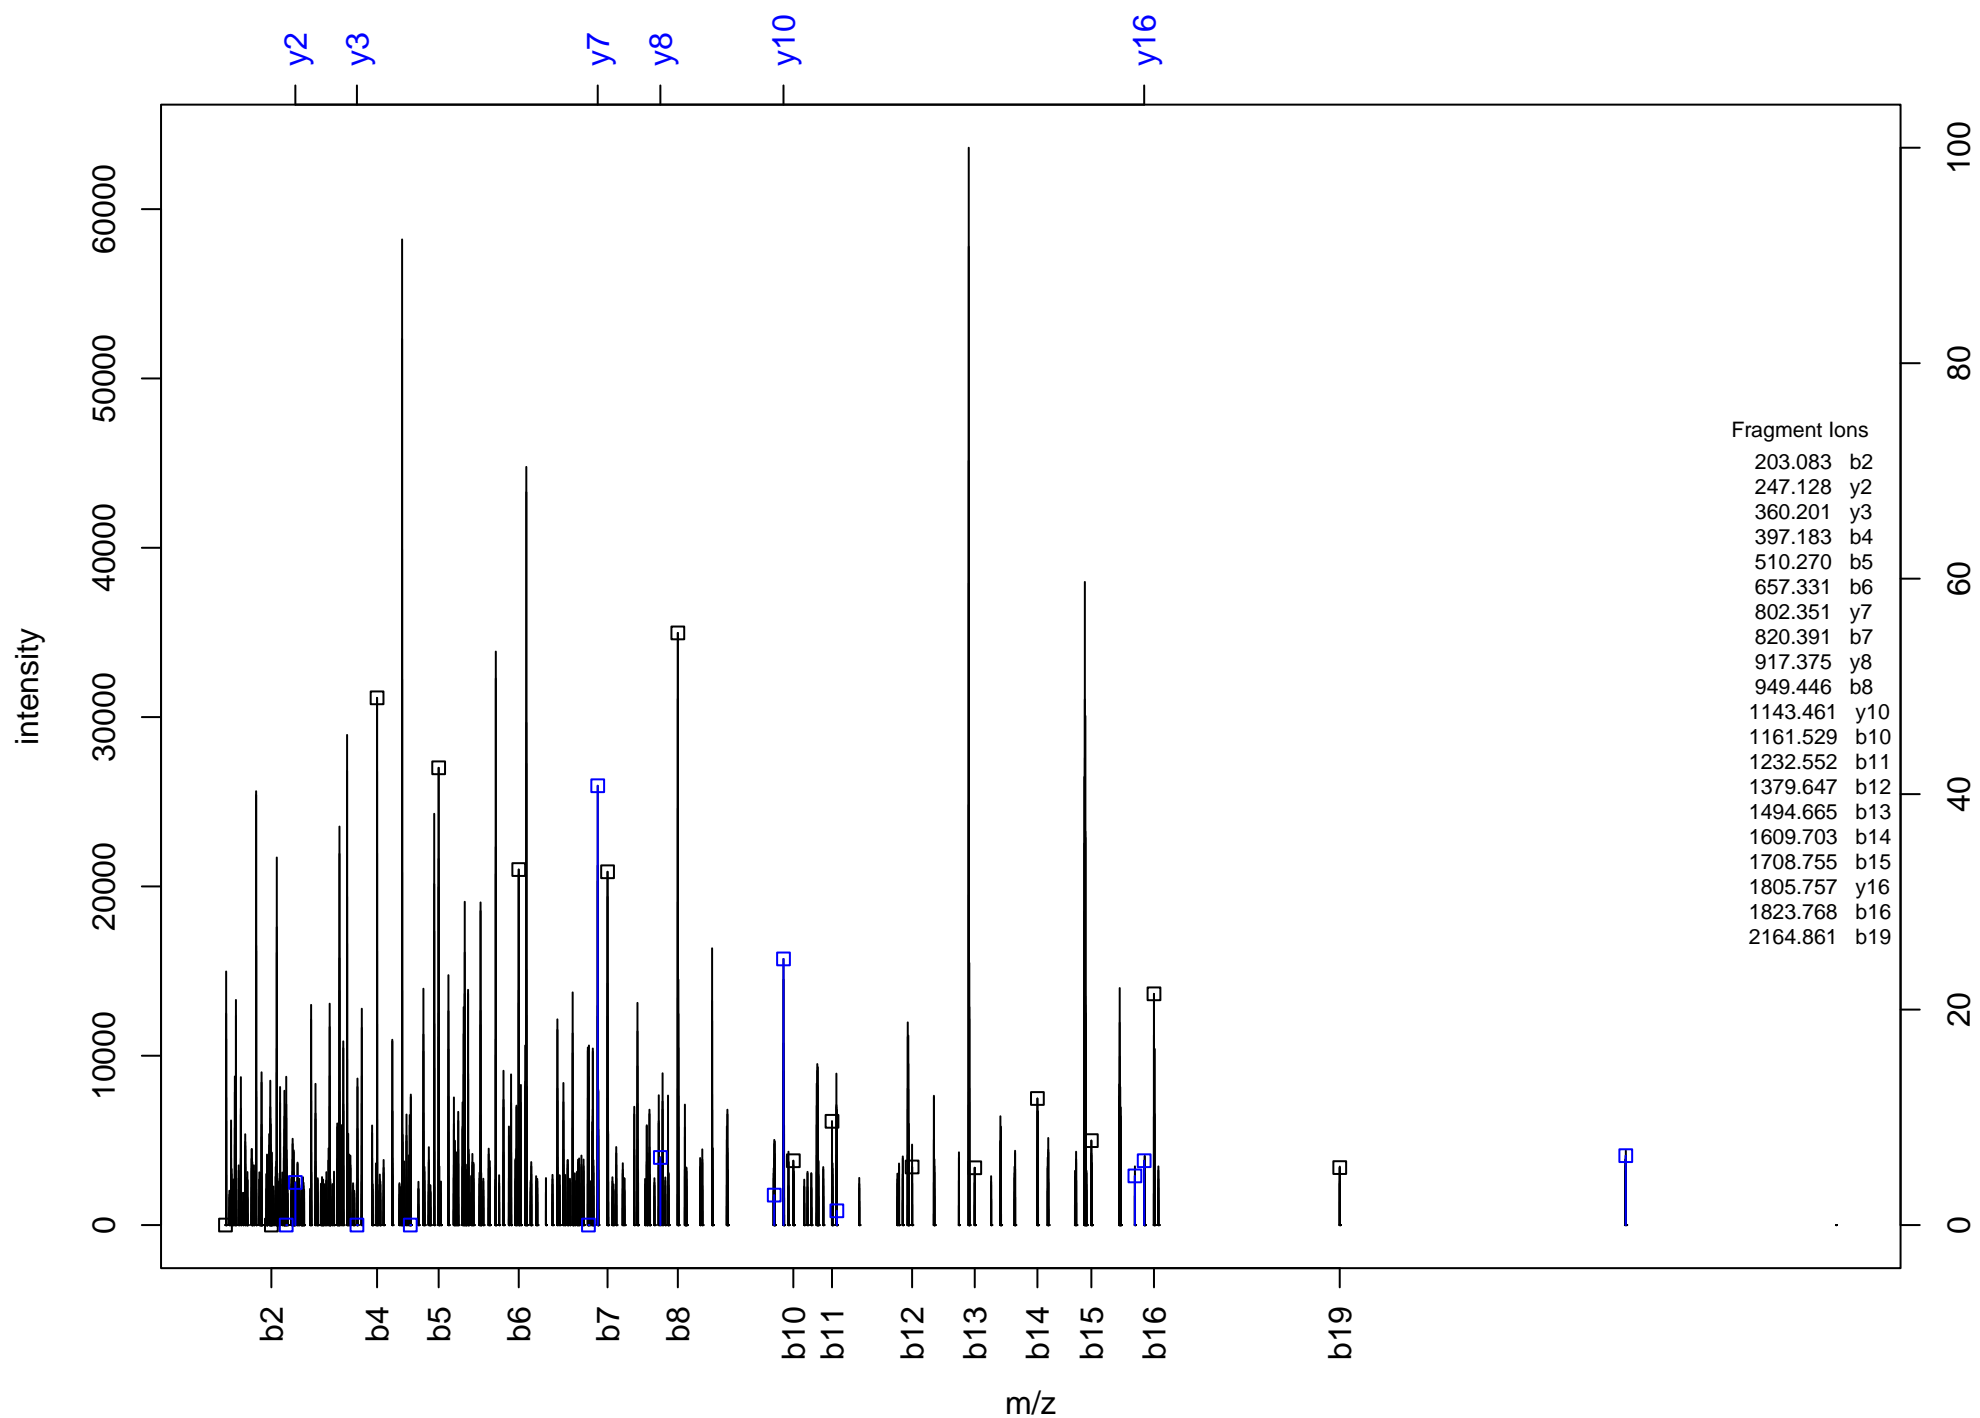

# EEYPGIEIESR

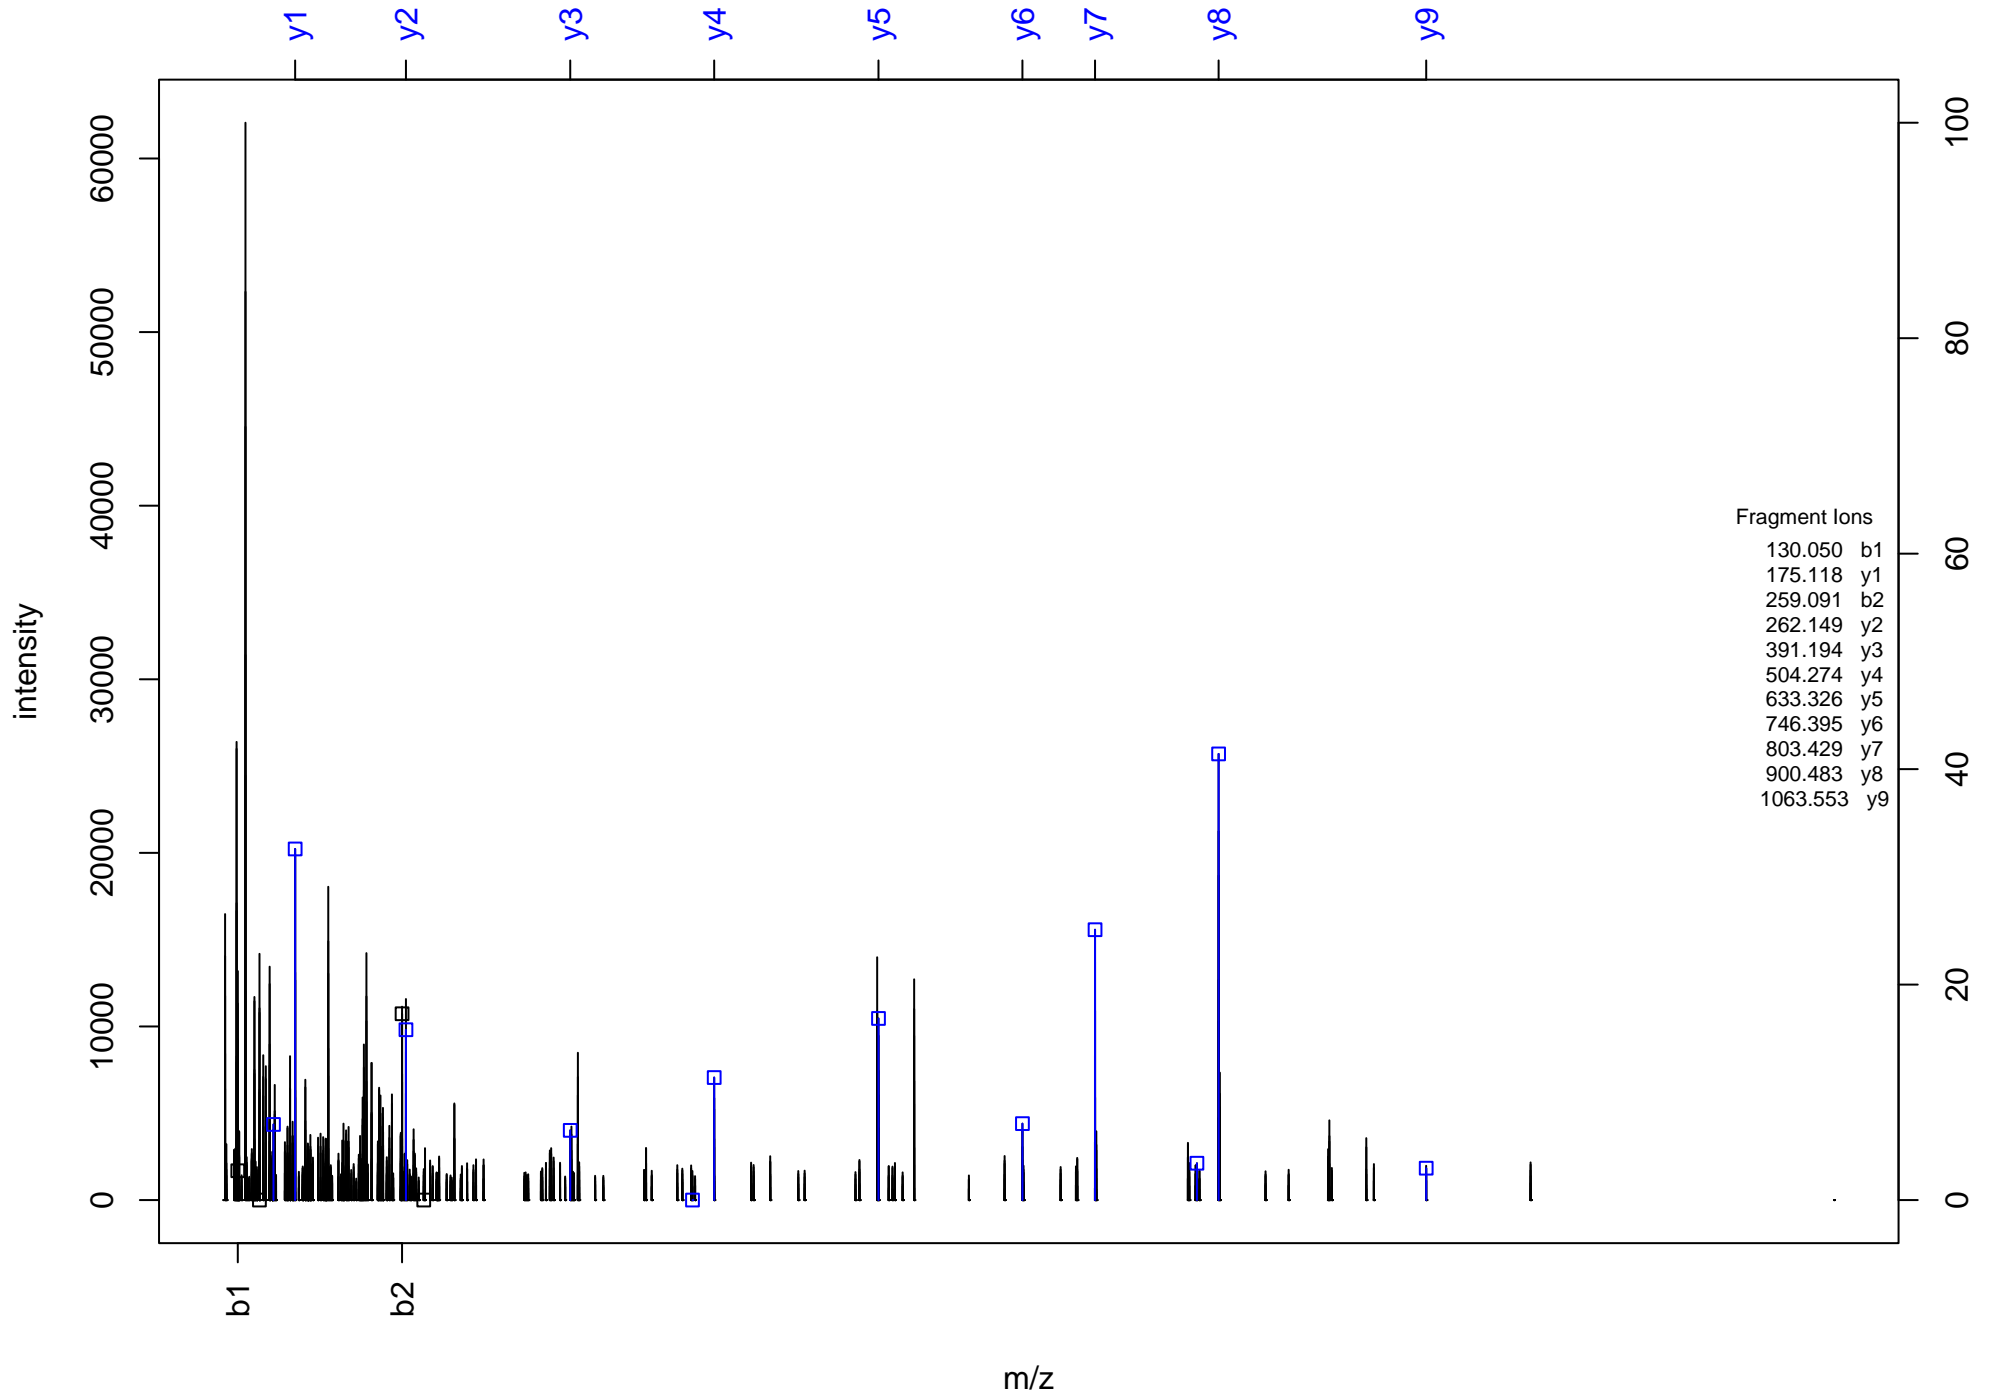



# GTSVVLICPQDGMEAI PNPFVQQQDT

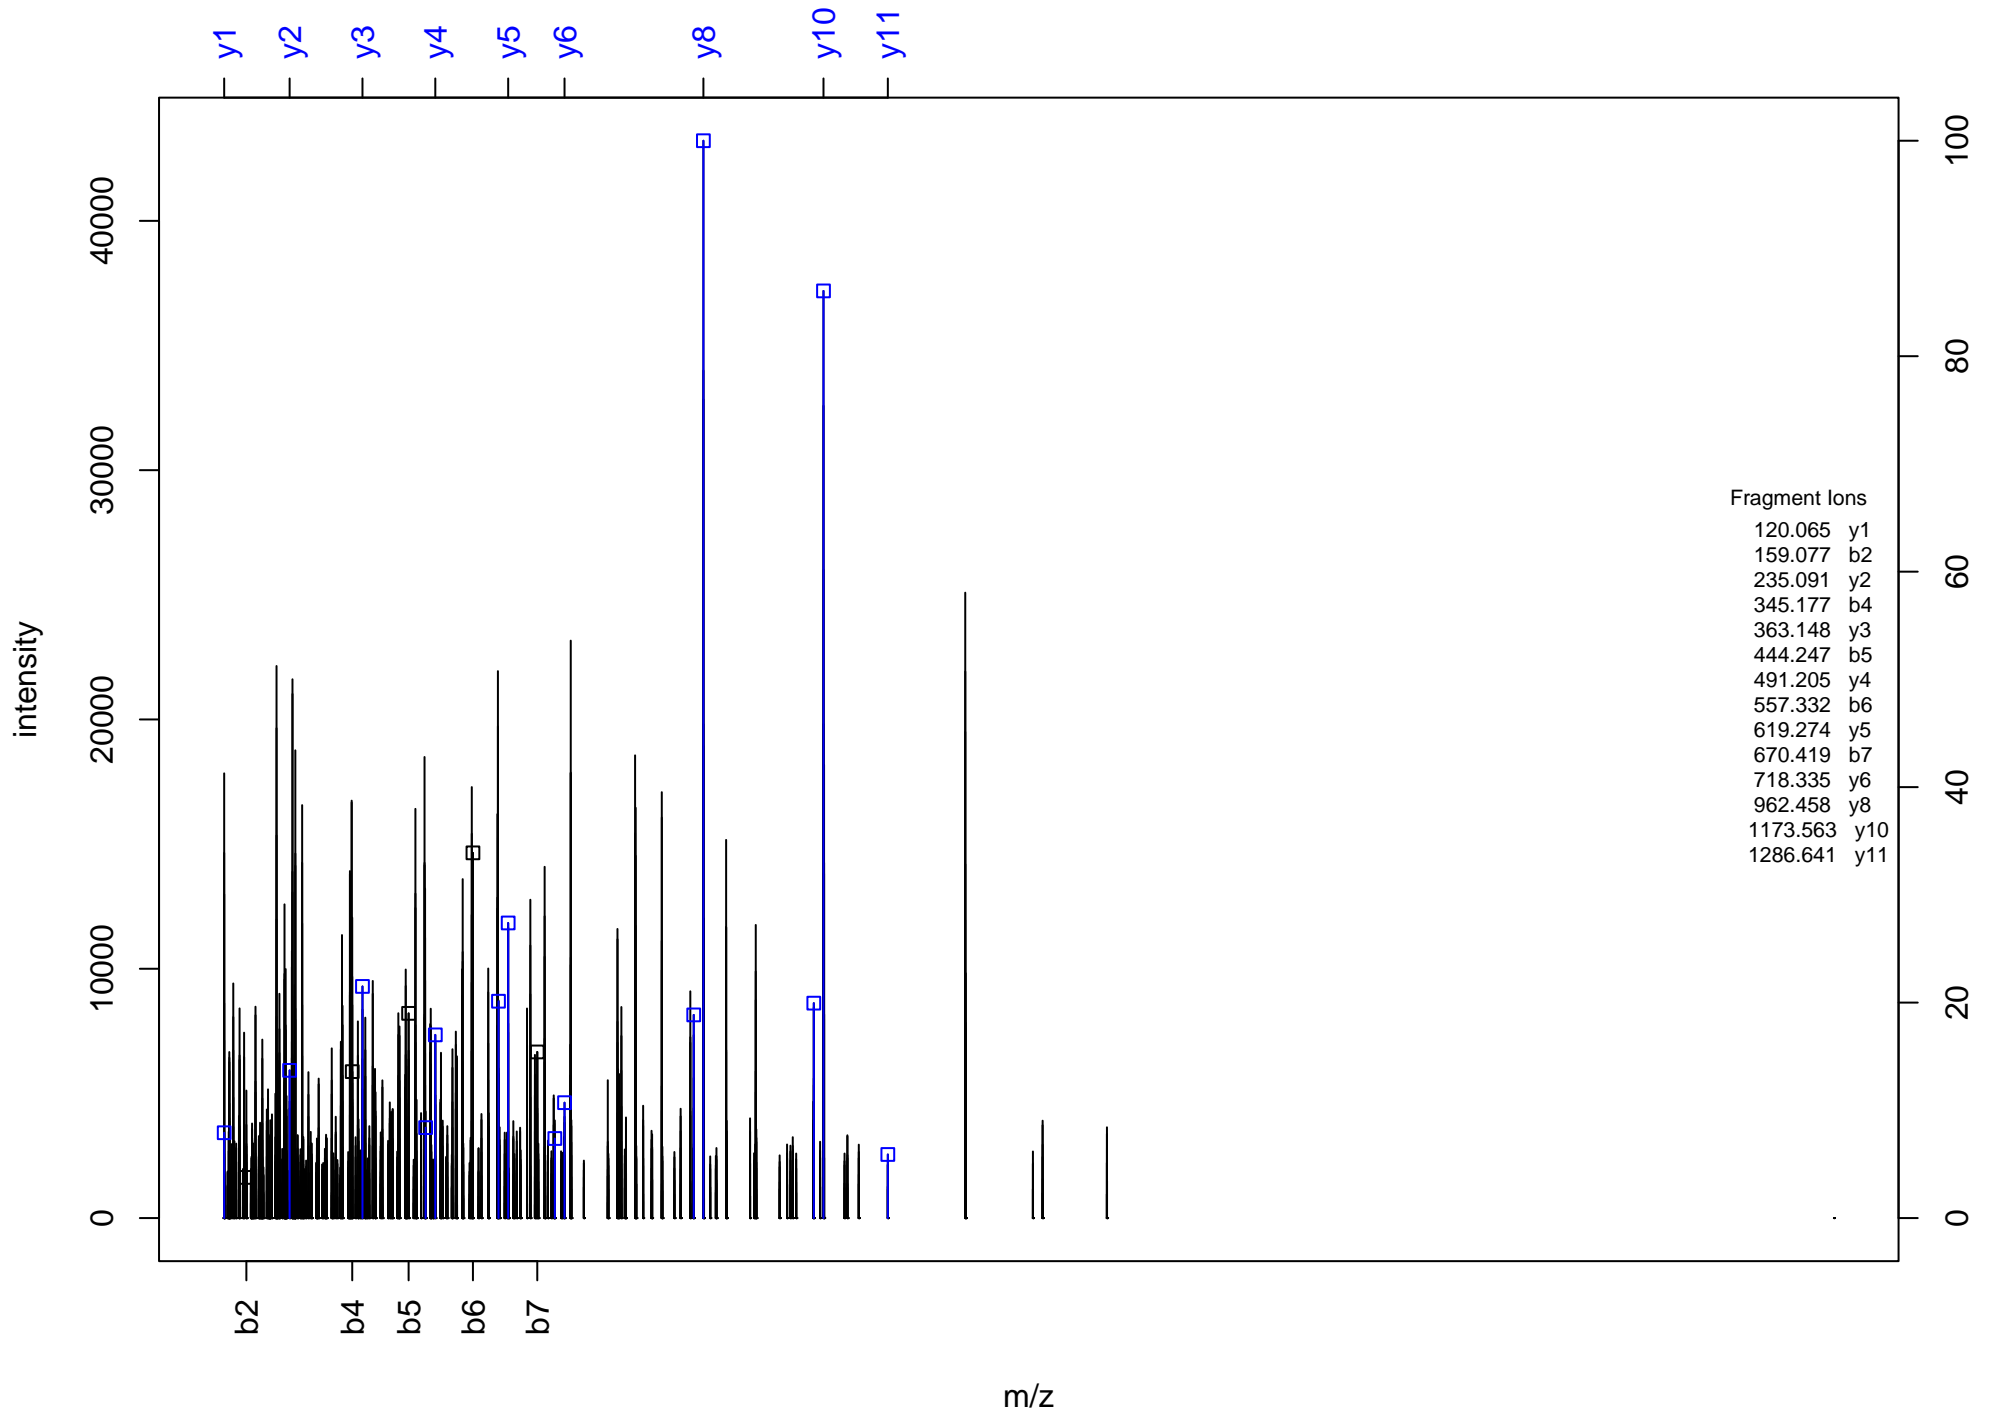

# IGPSILNSDLANLGAECLR

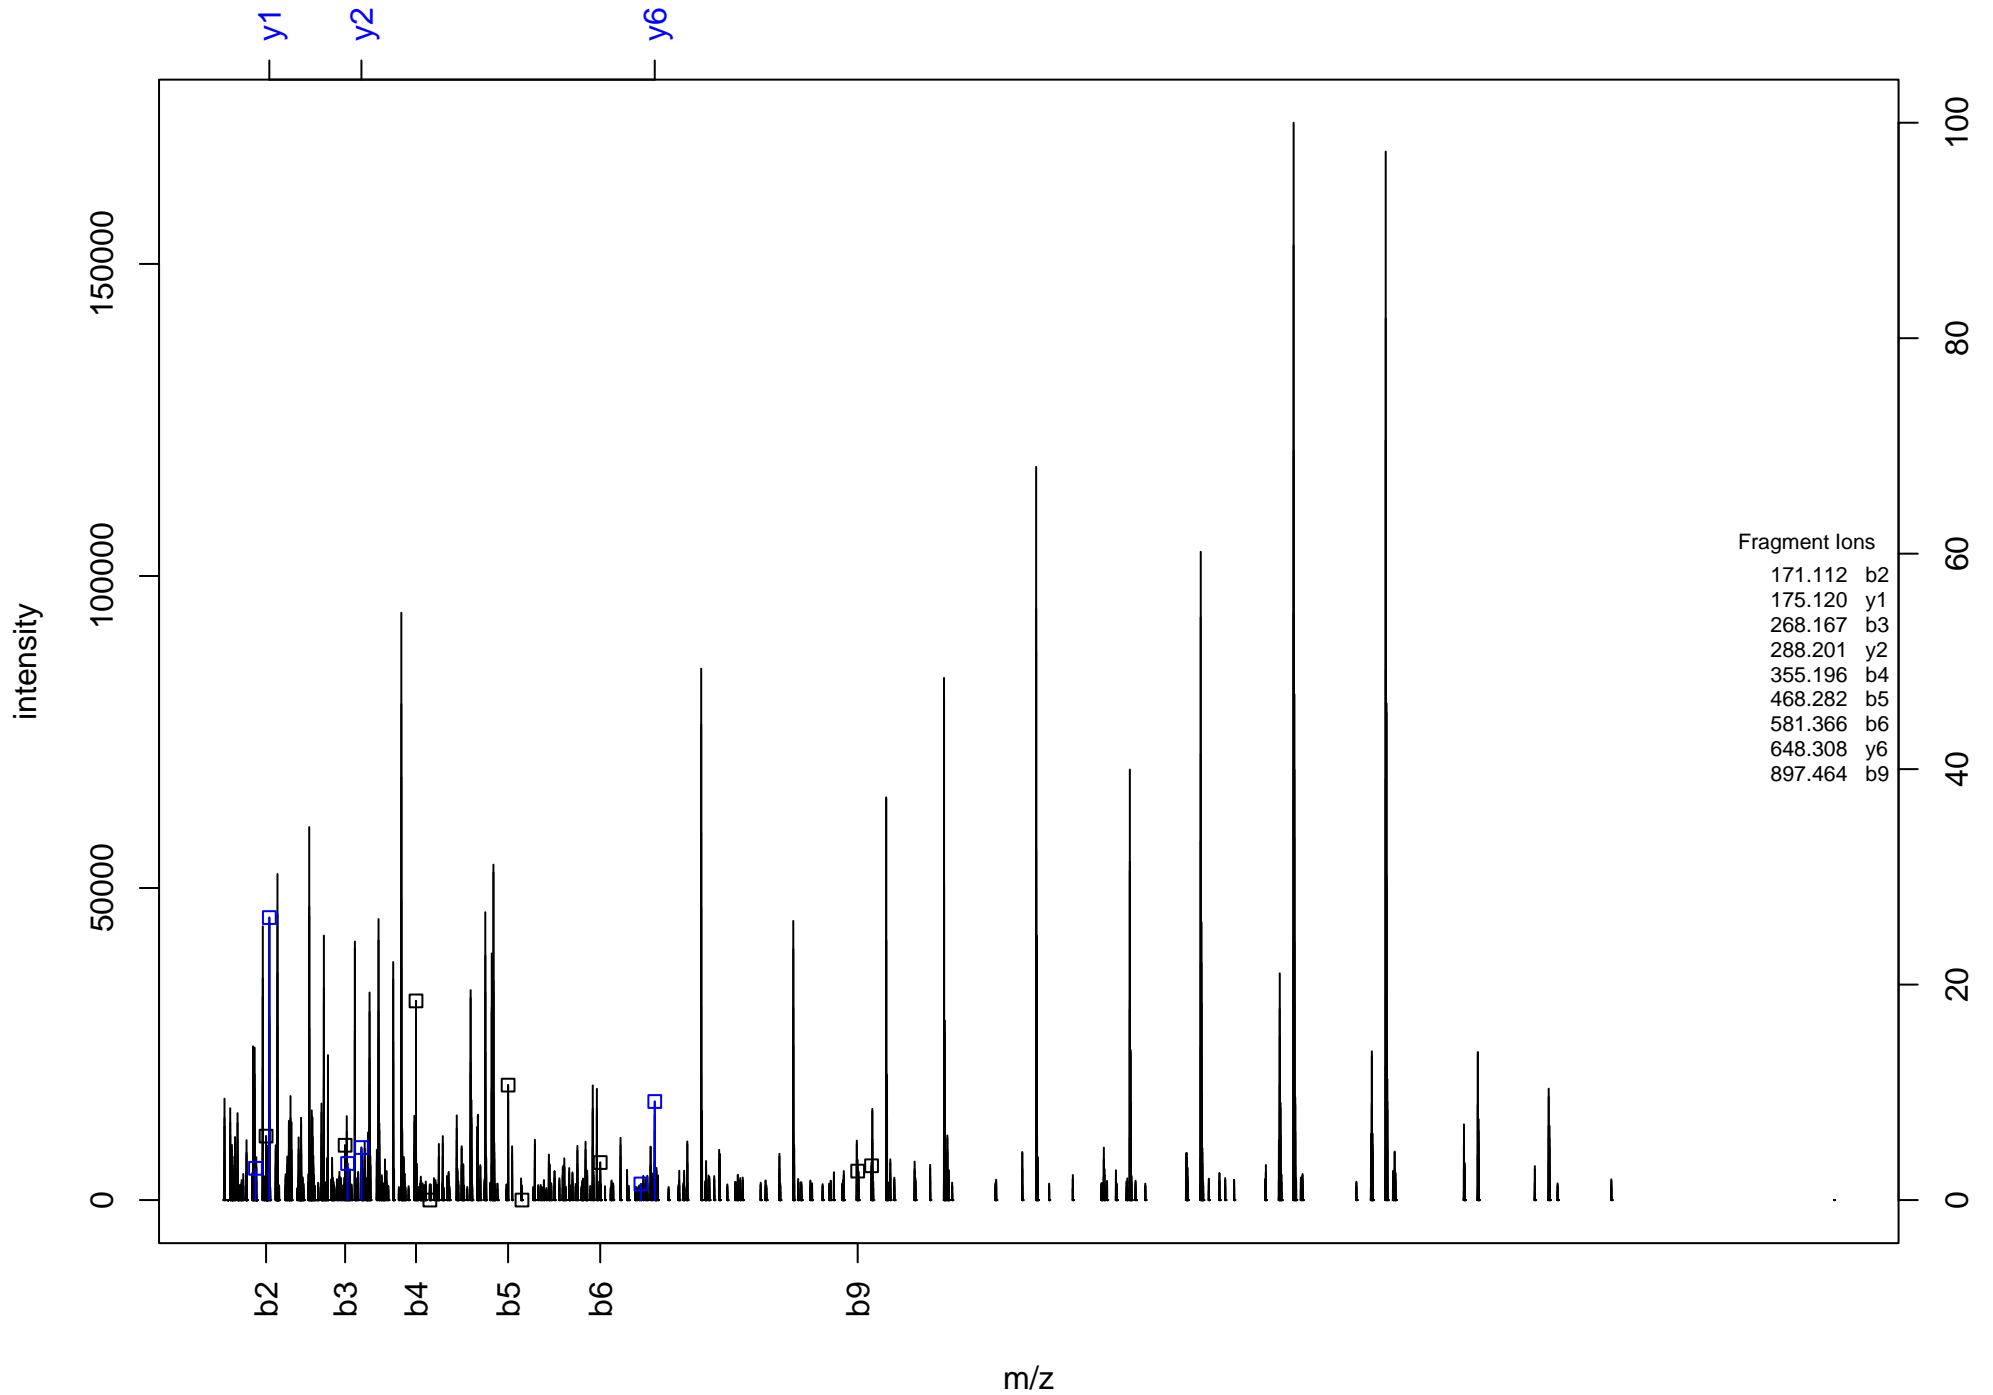

# KNN^TSEN^GLTGR

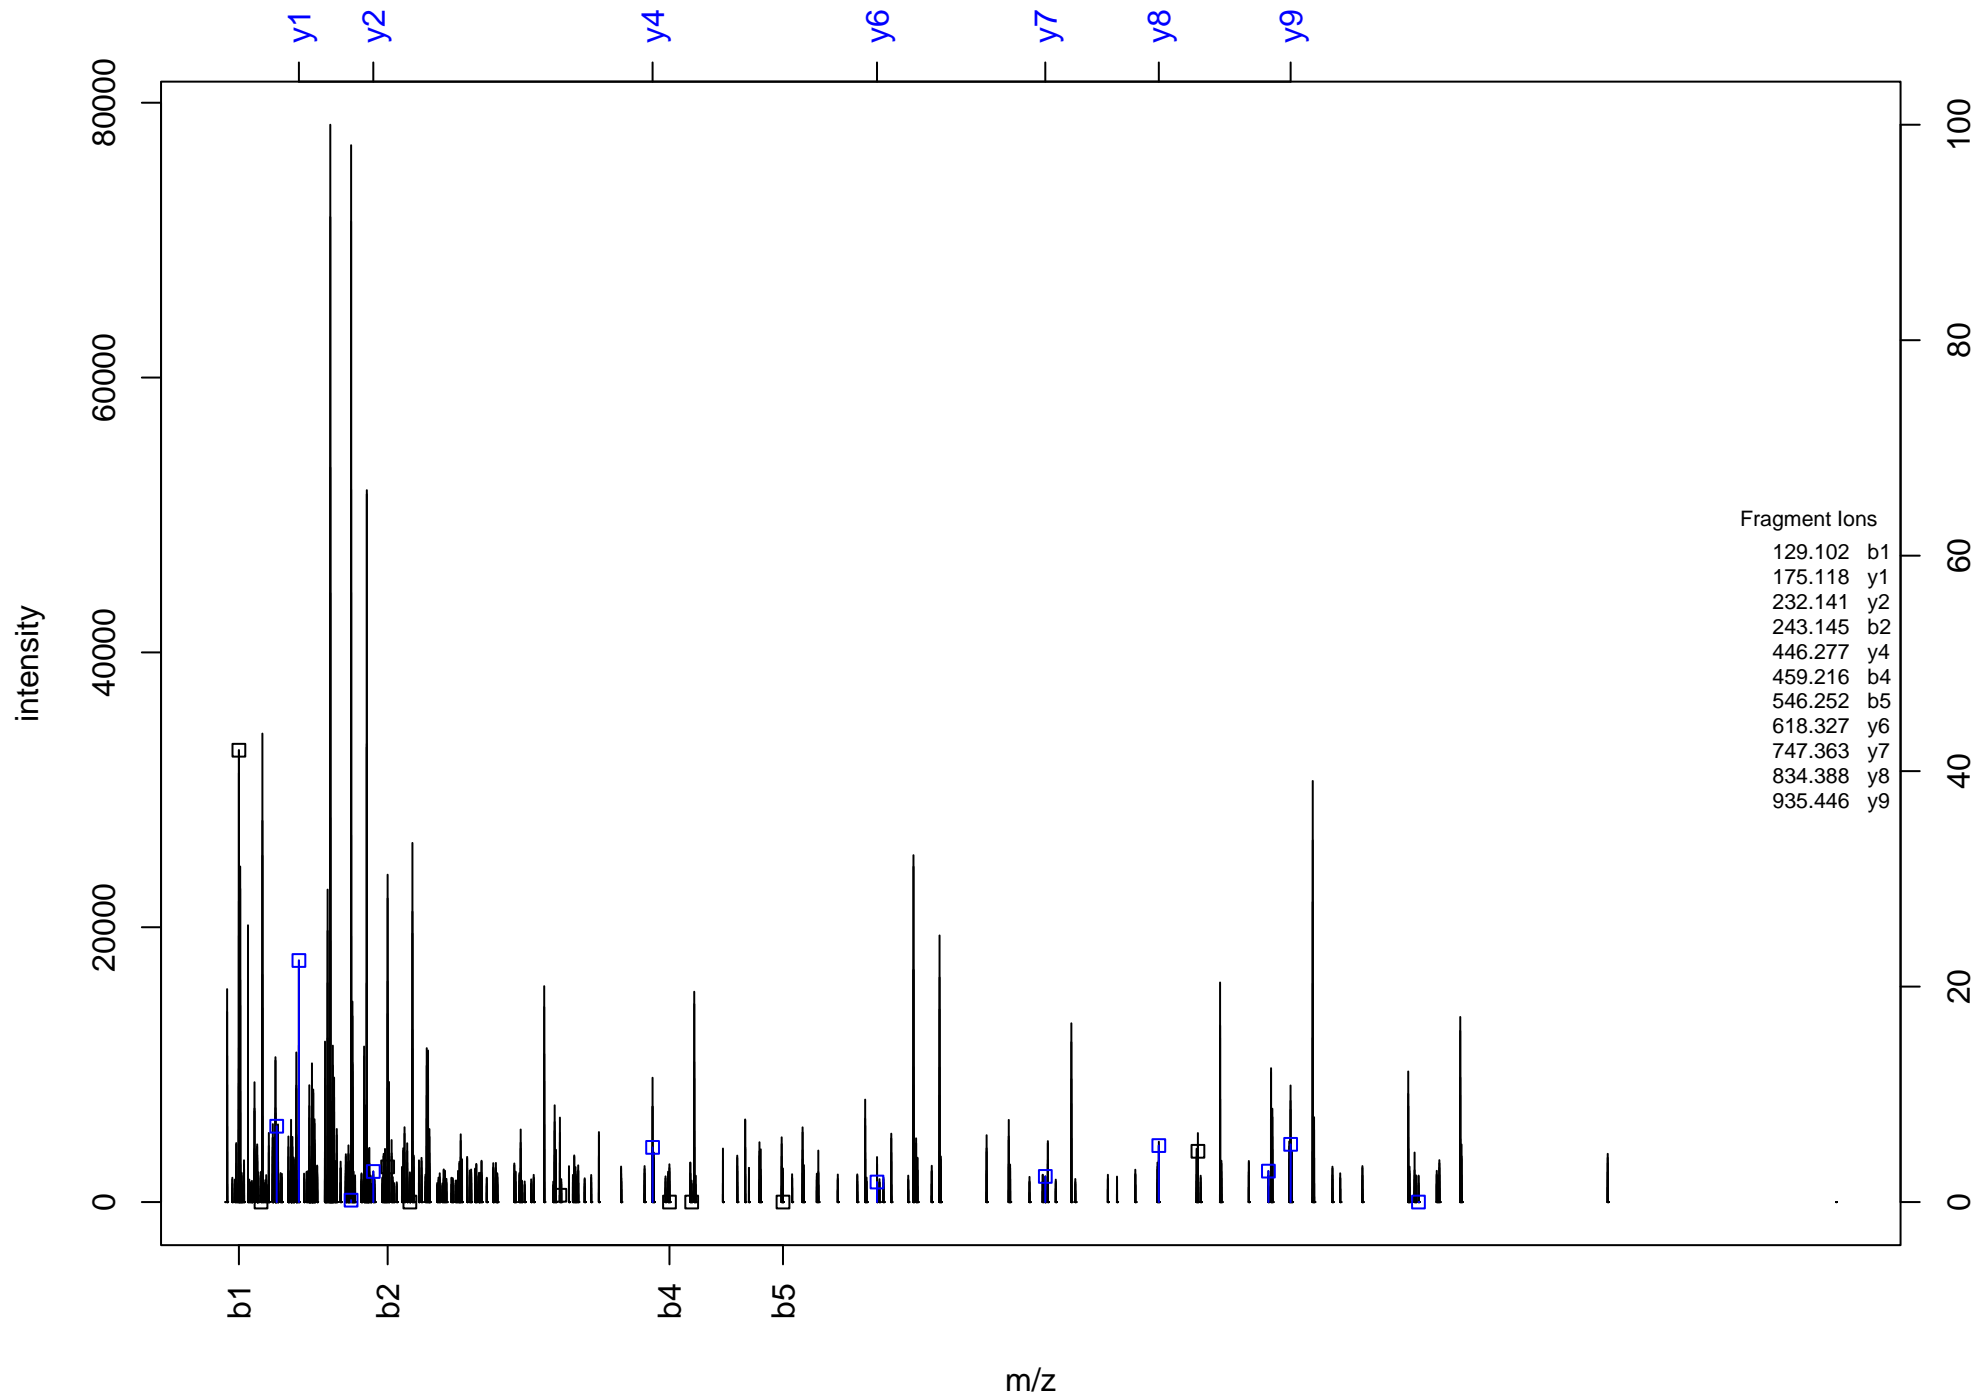

# DLQEVIELTK

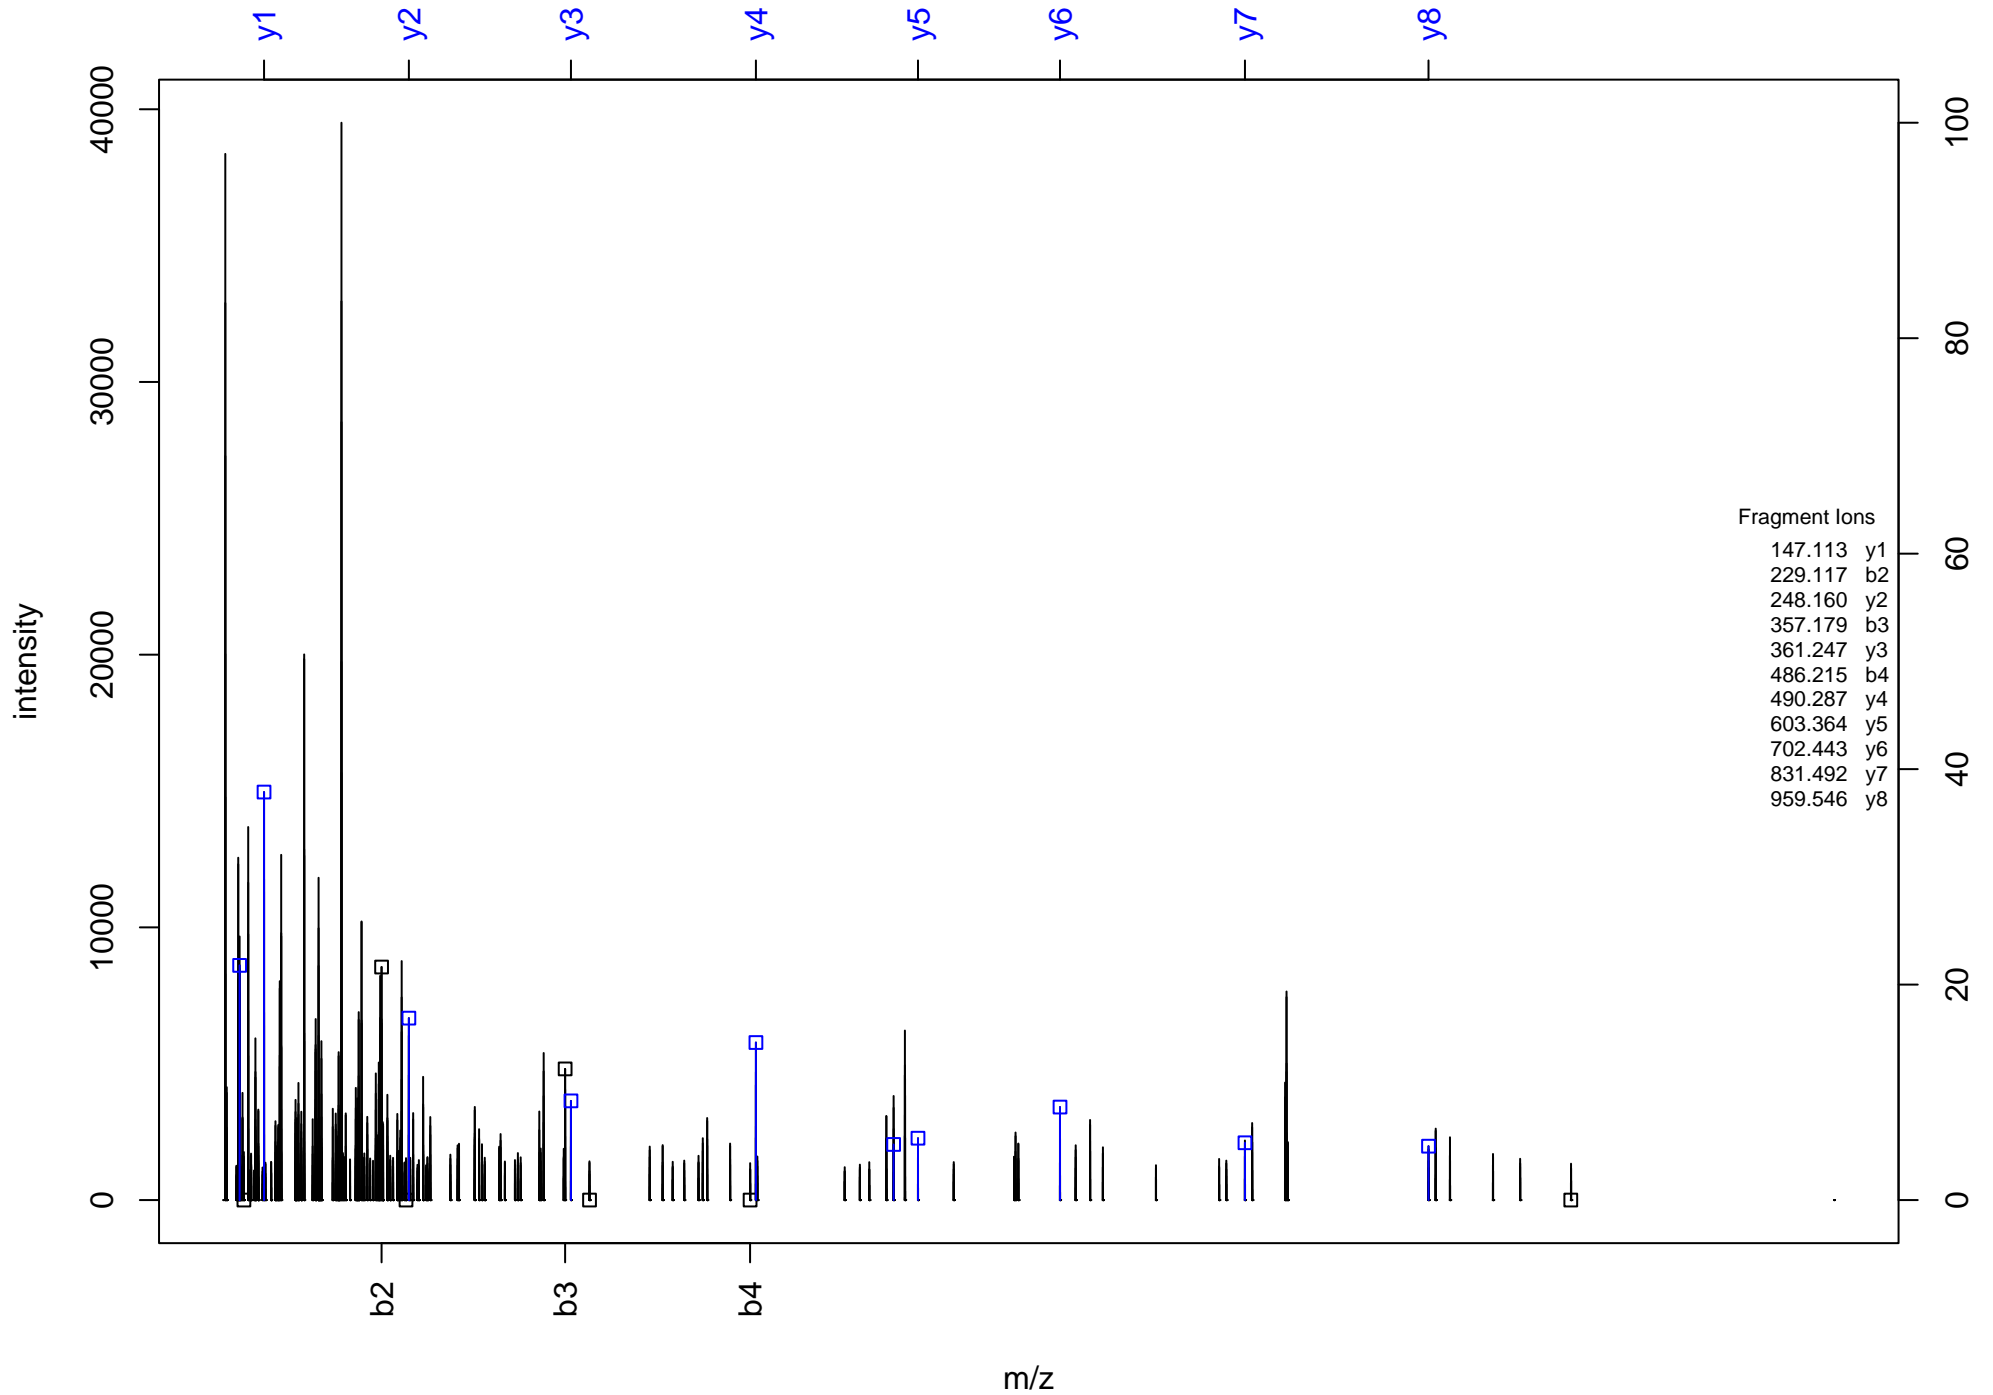

# CKM\*DM\*MSLN^SQLLDAlQ^QK

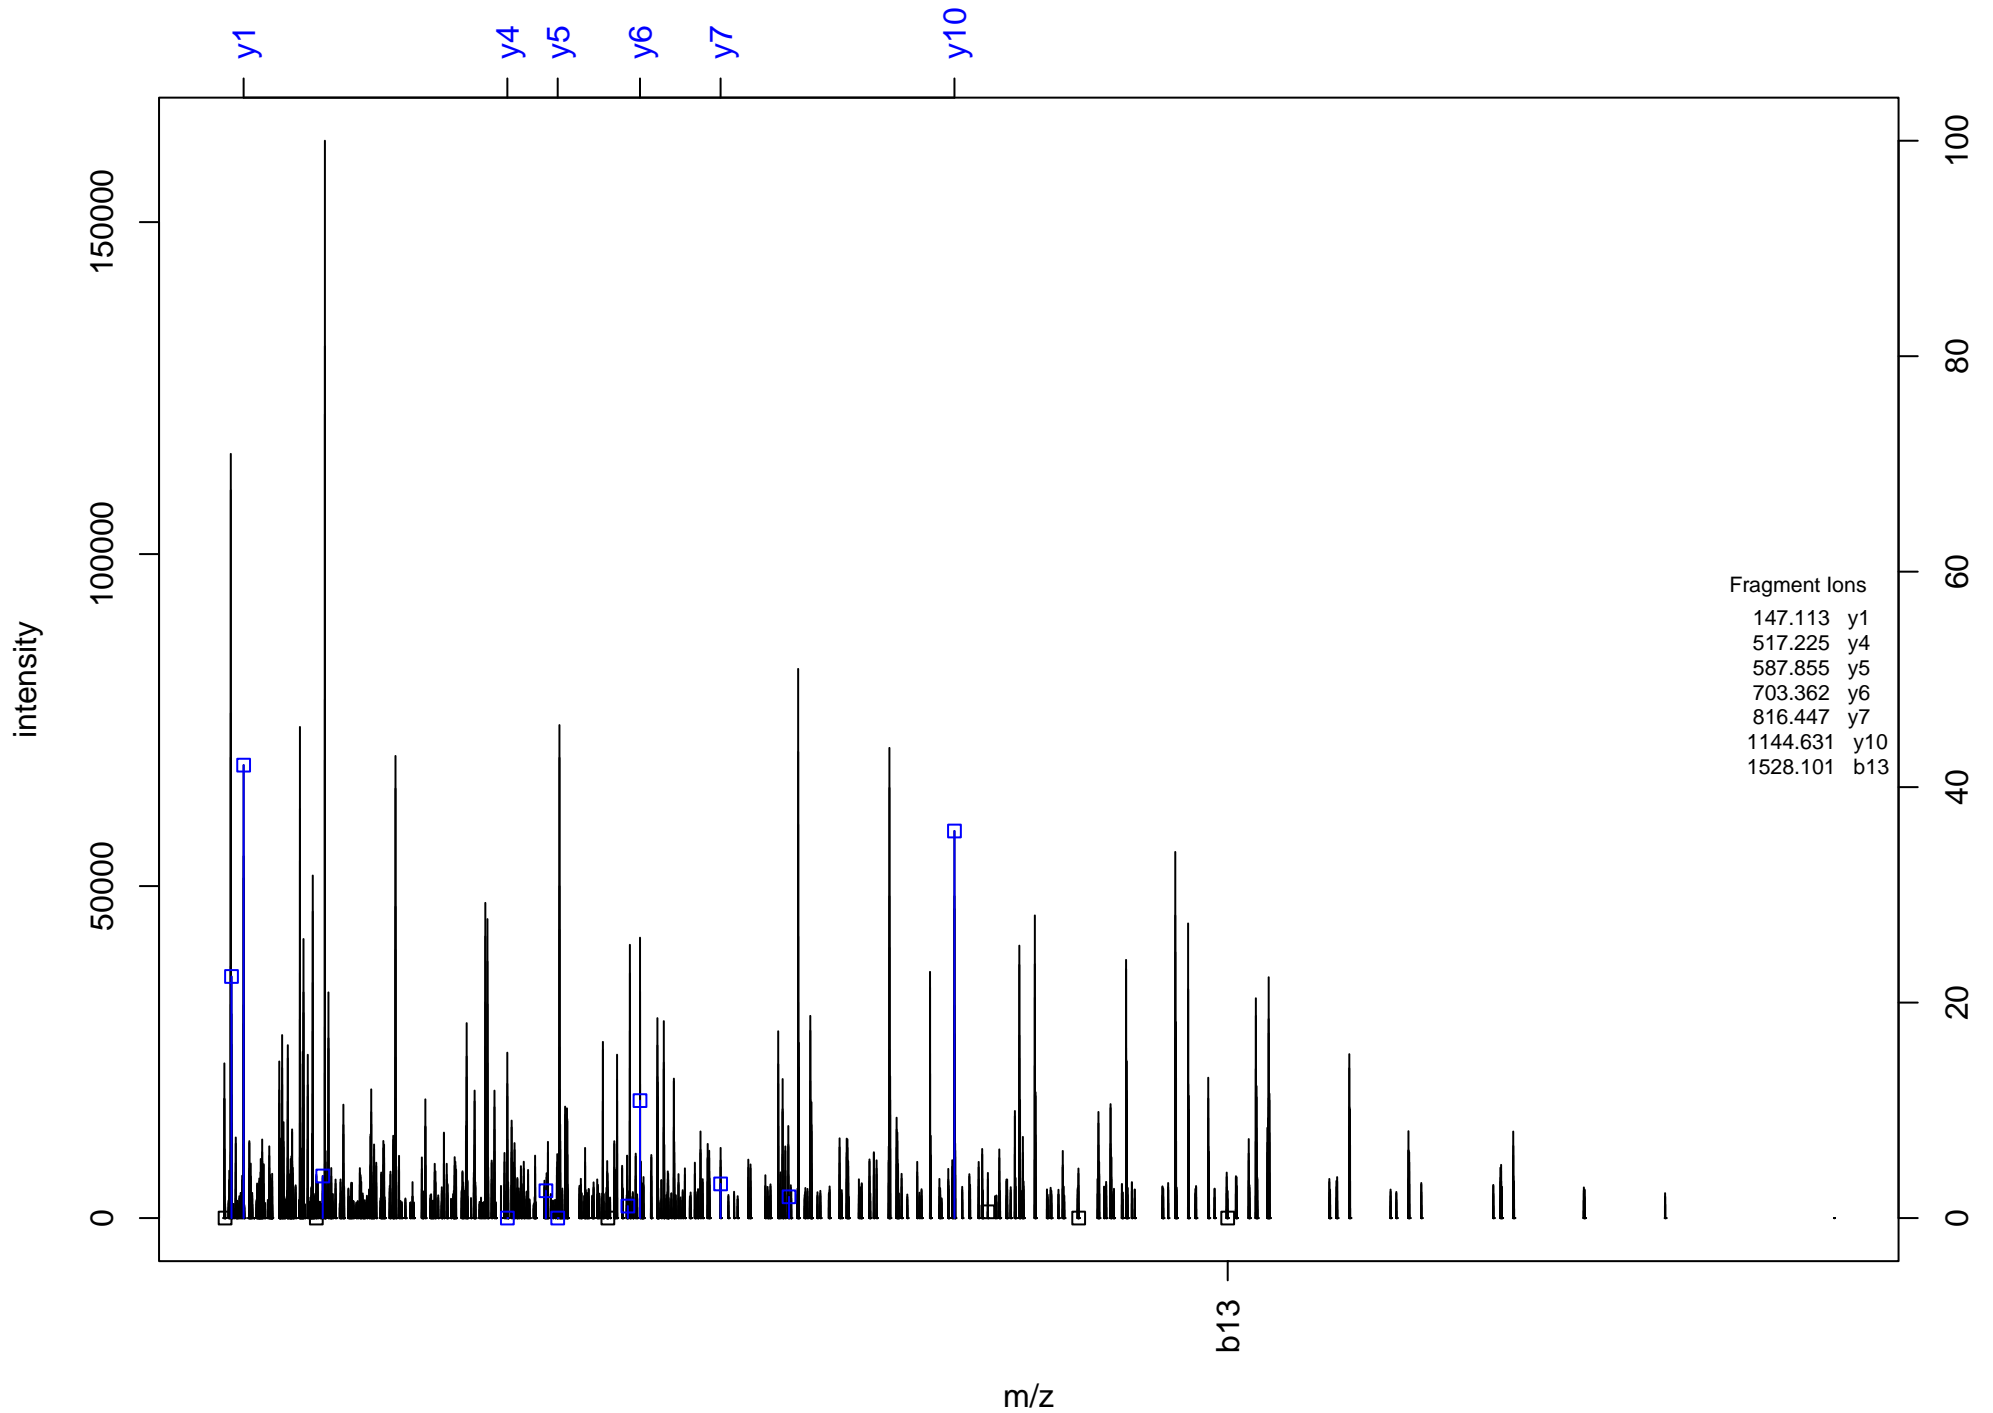

# ADEIESYLENLK

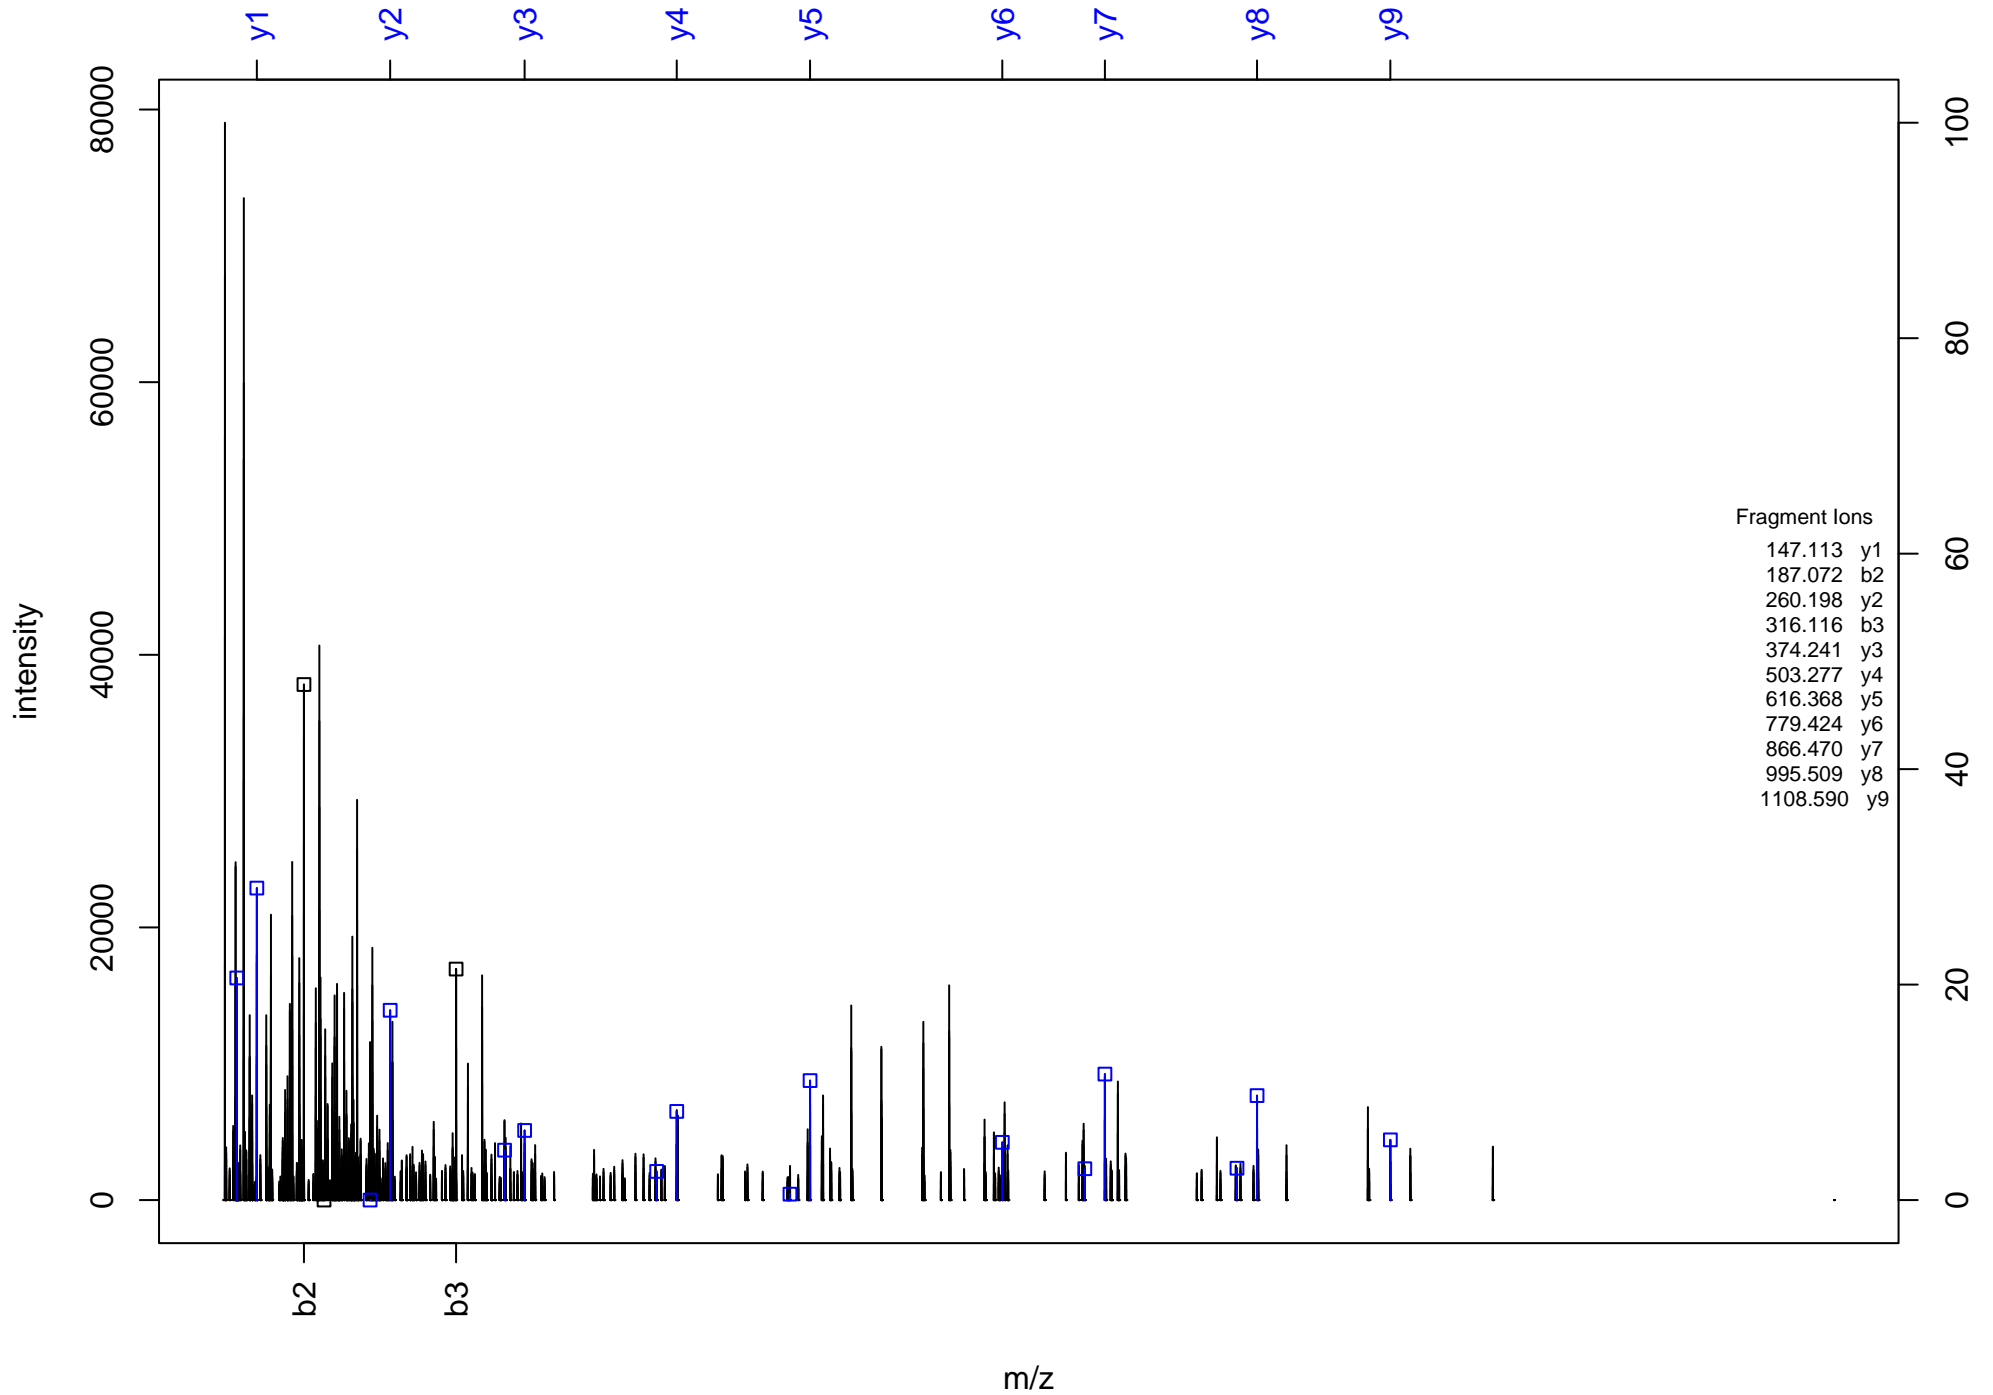

(Ac)FKEQ<sup>^</sup>QLQIFN<sup>^</sup>LMKFDSYTR

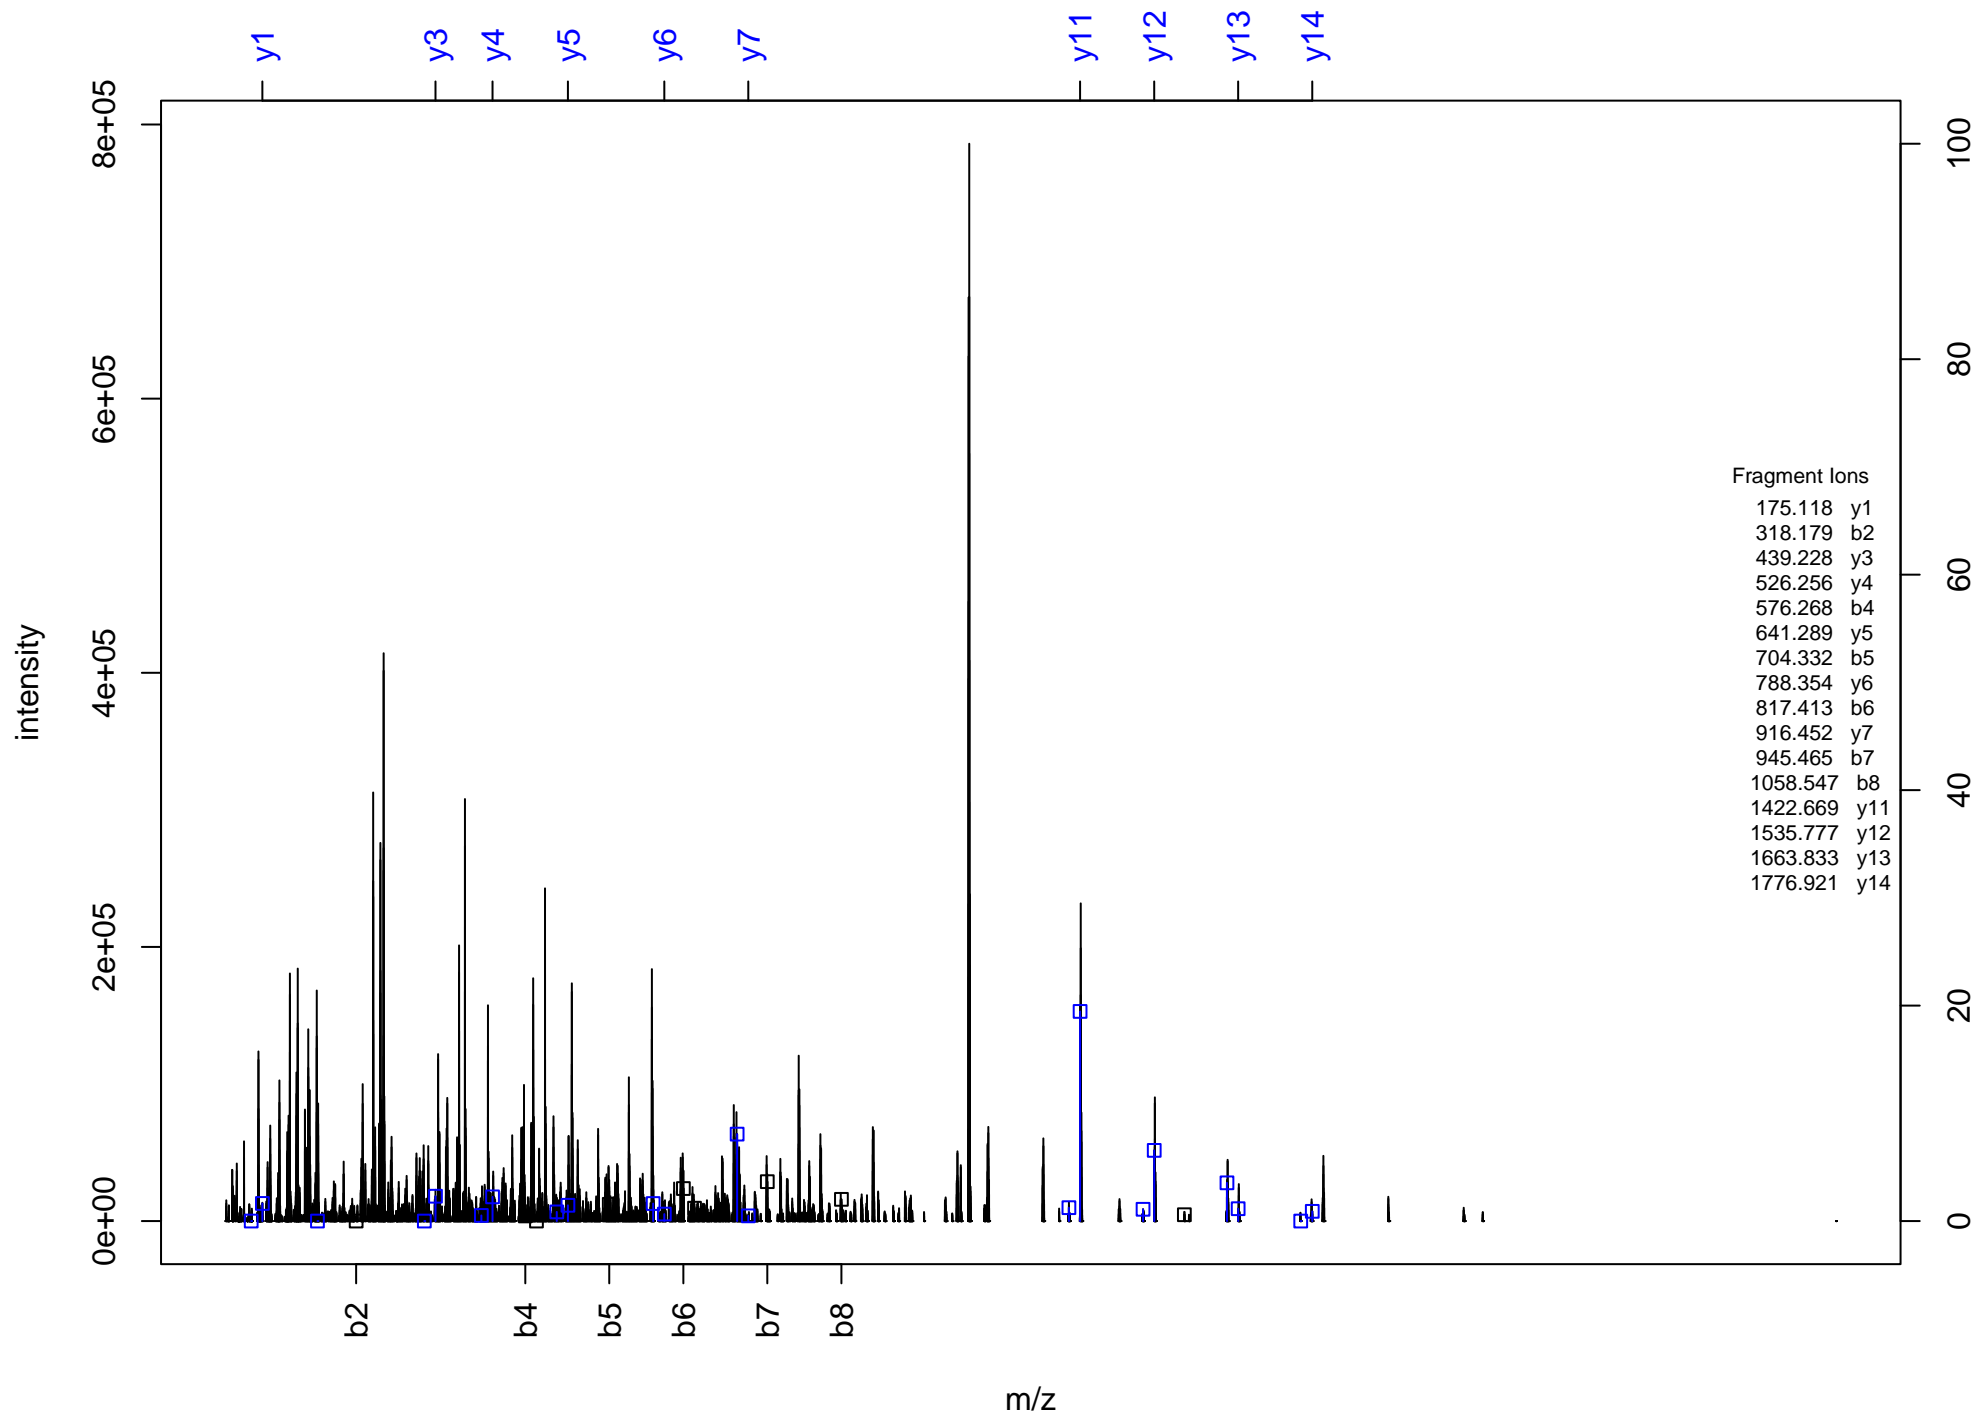

# VEMSDMSFSK

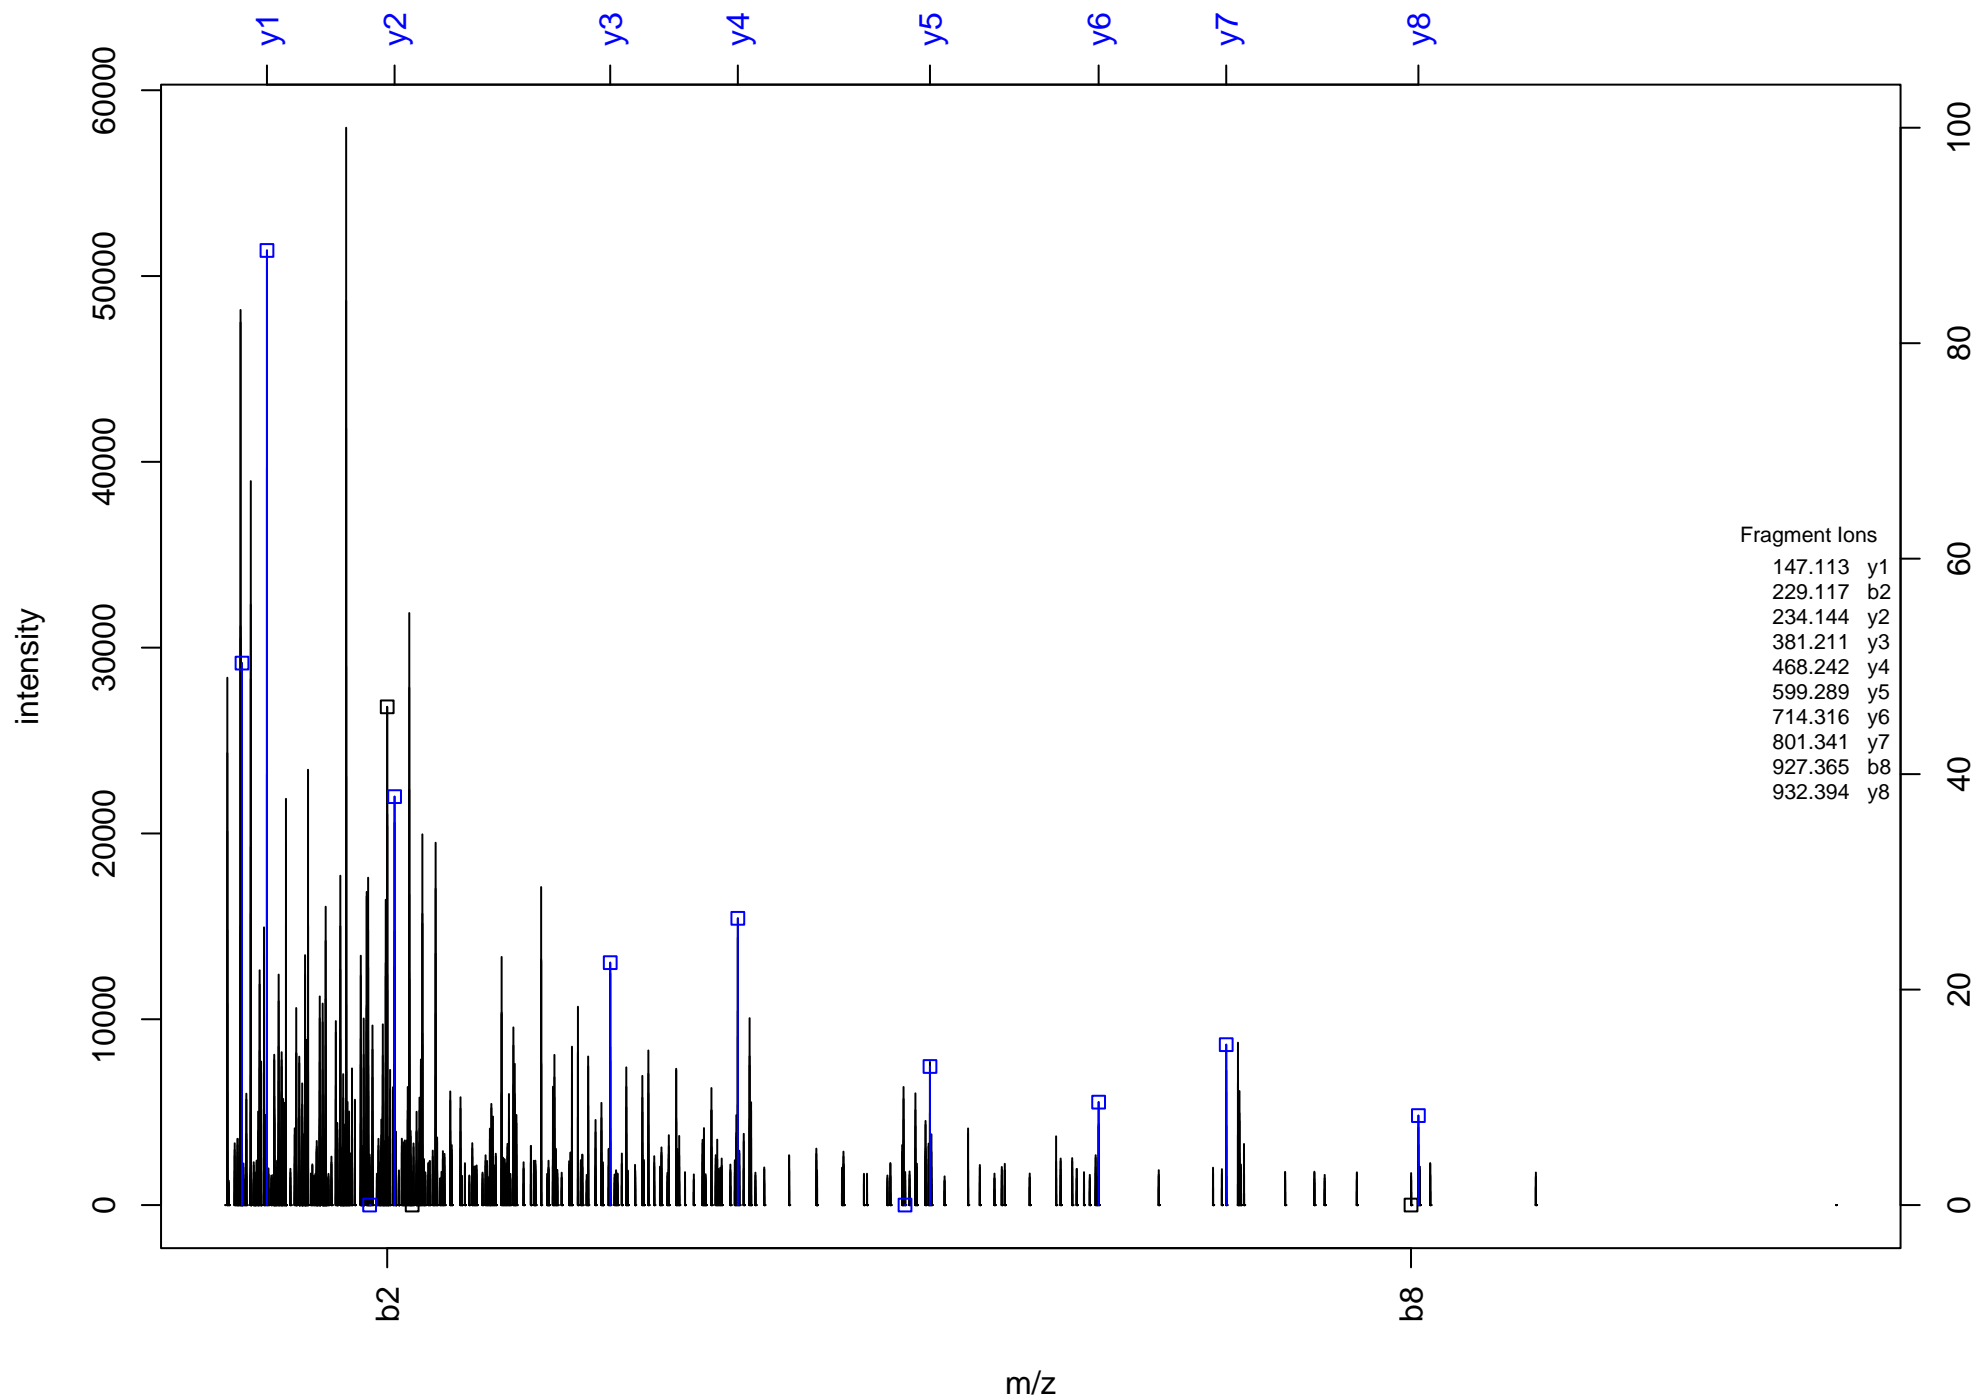



# MIITQYIPK

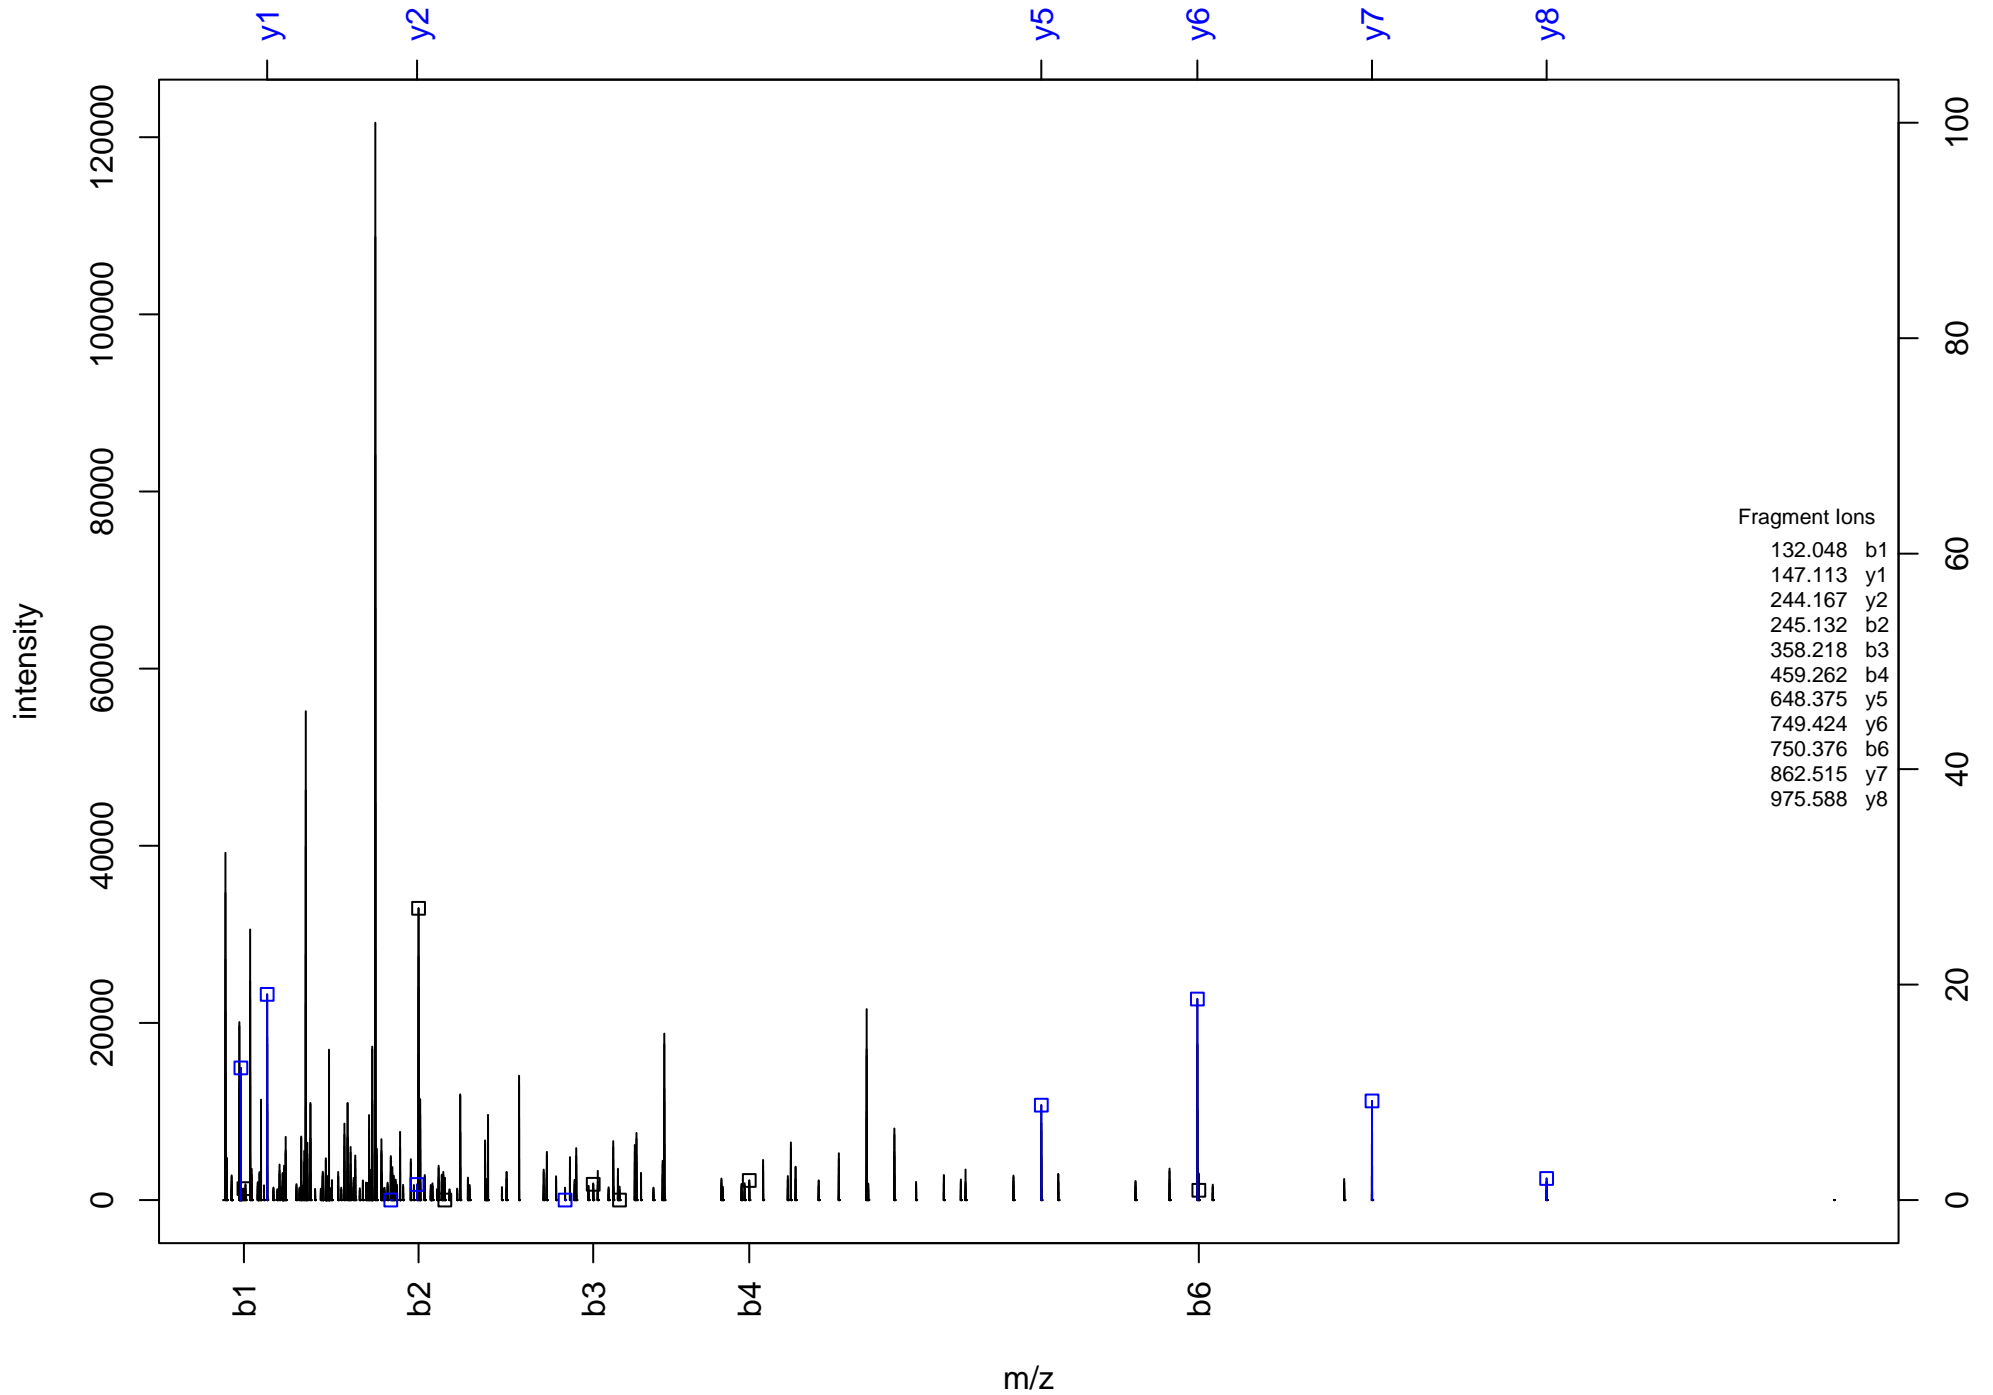

# NLSDIDLMAPQPGV

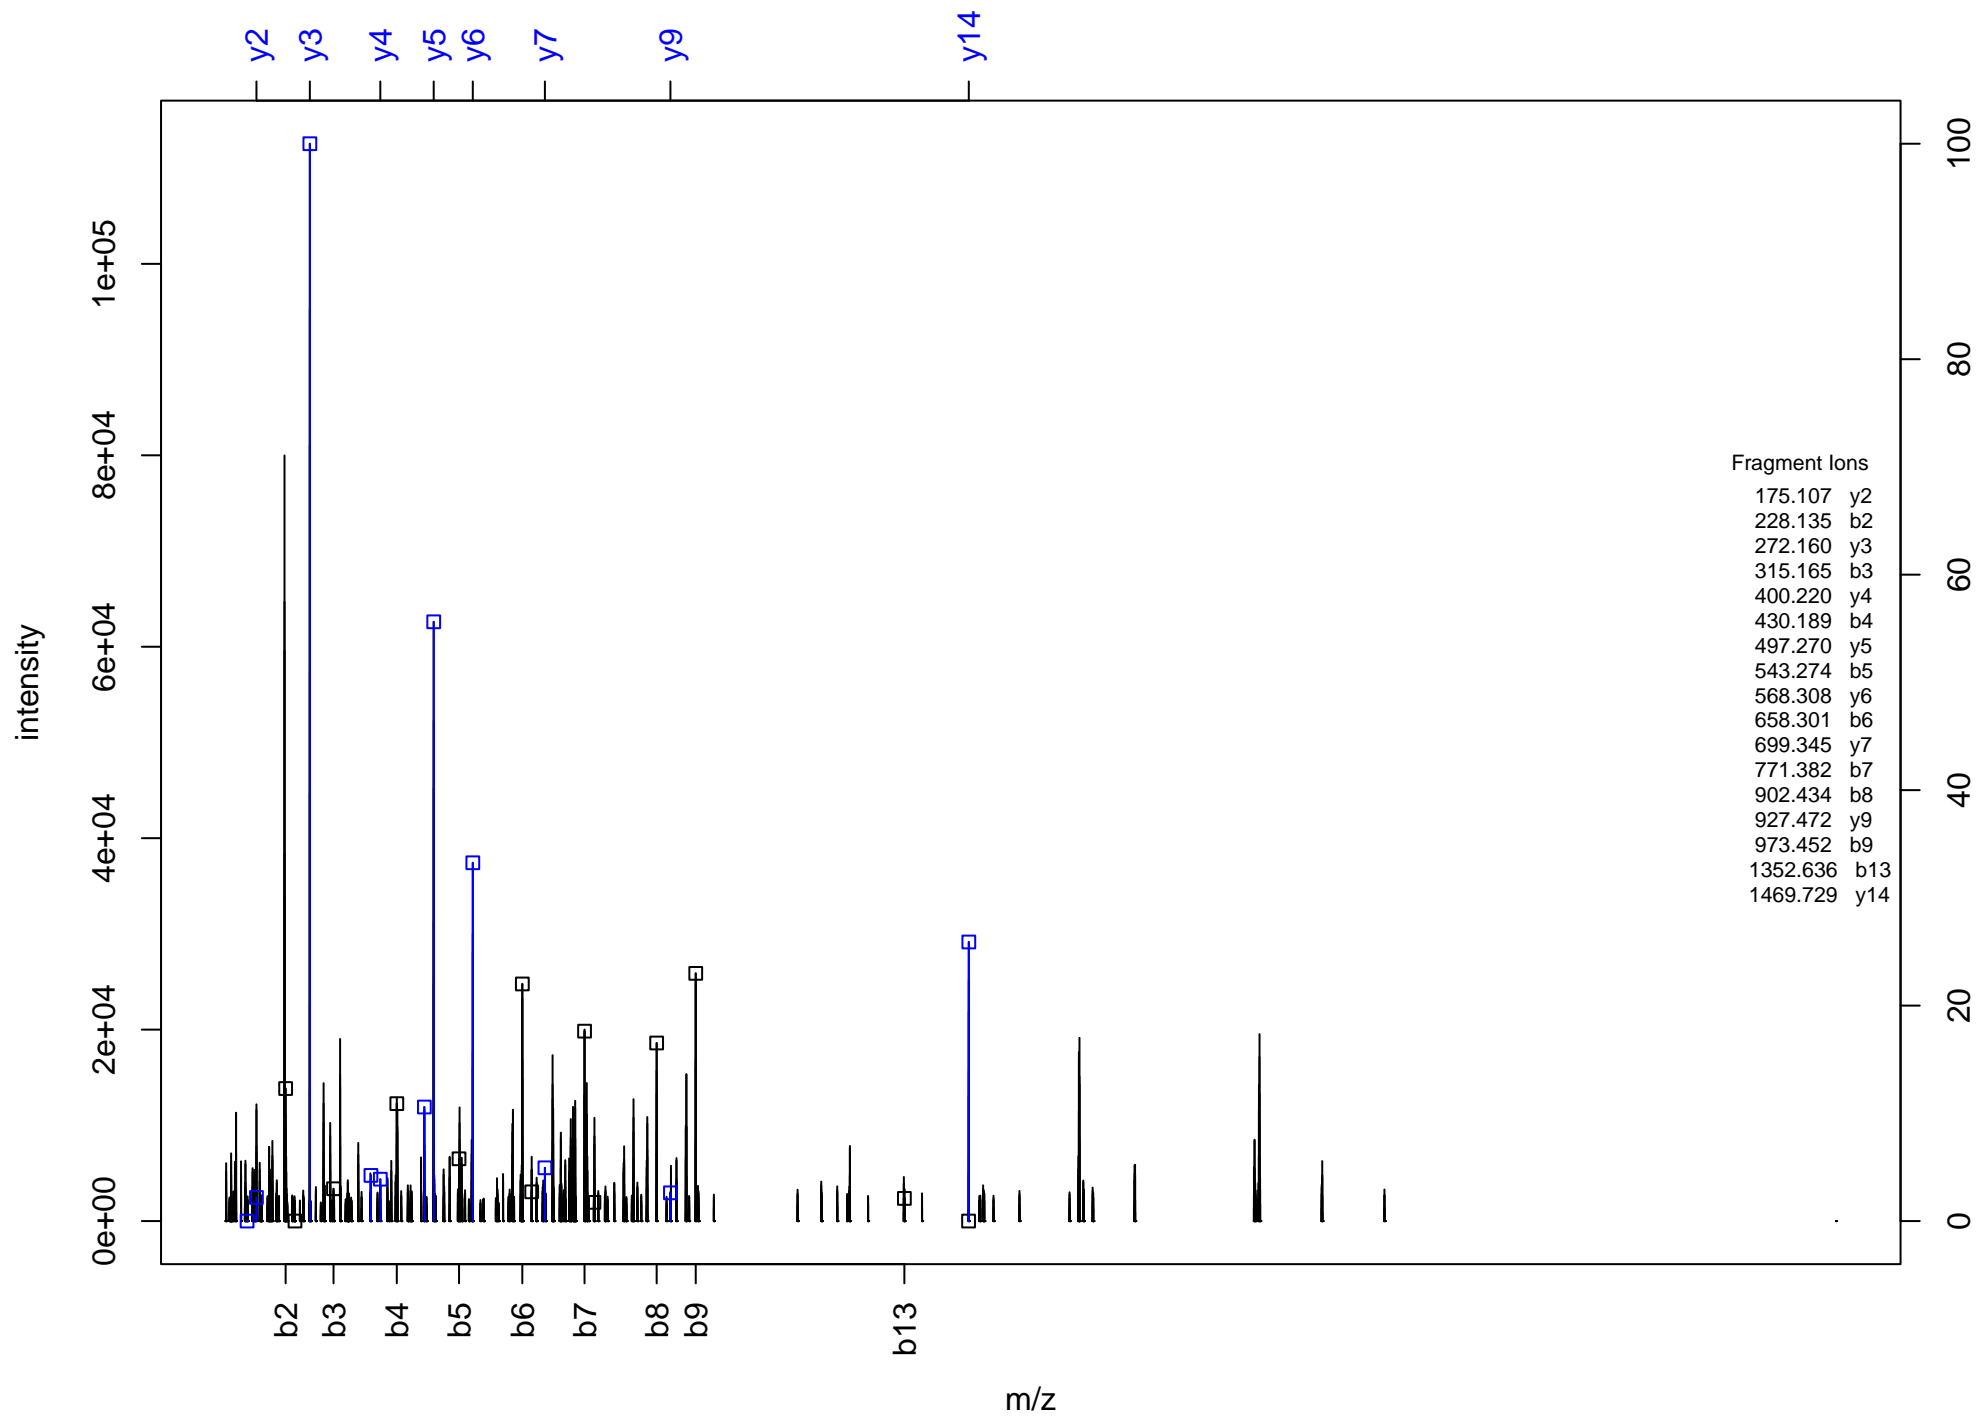

# LKHLPEKYM\*MNSVLENFTILQVVTN^R

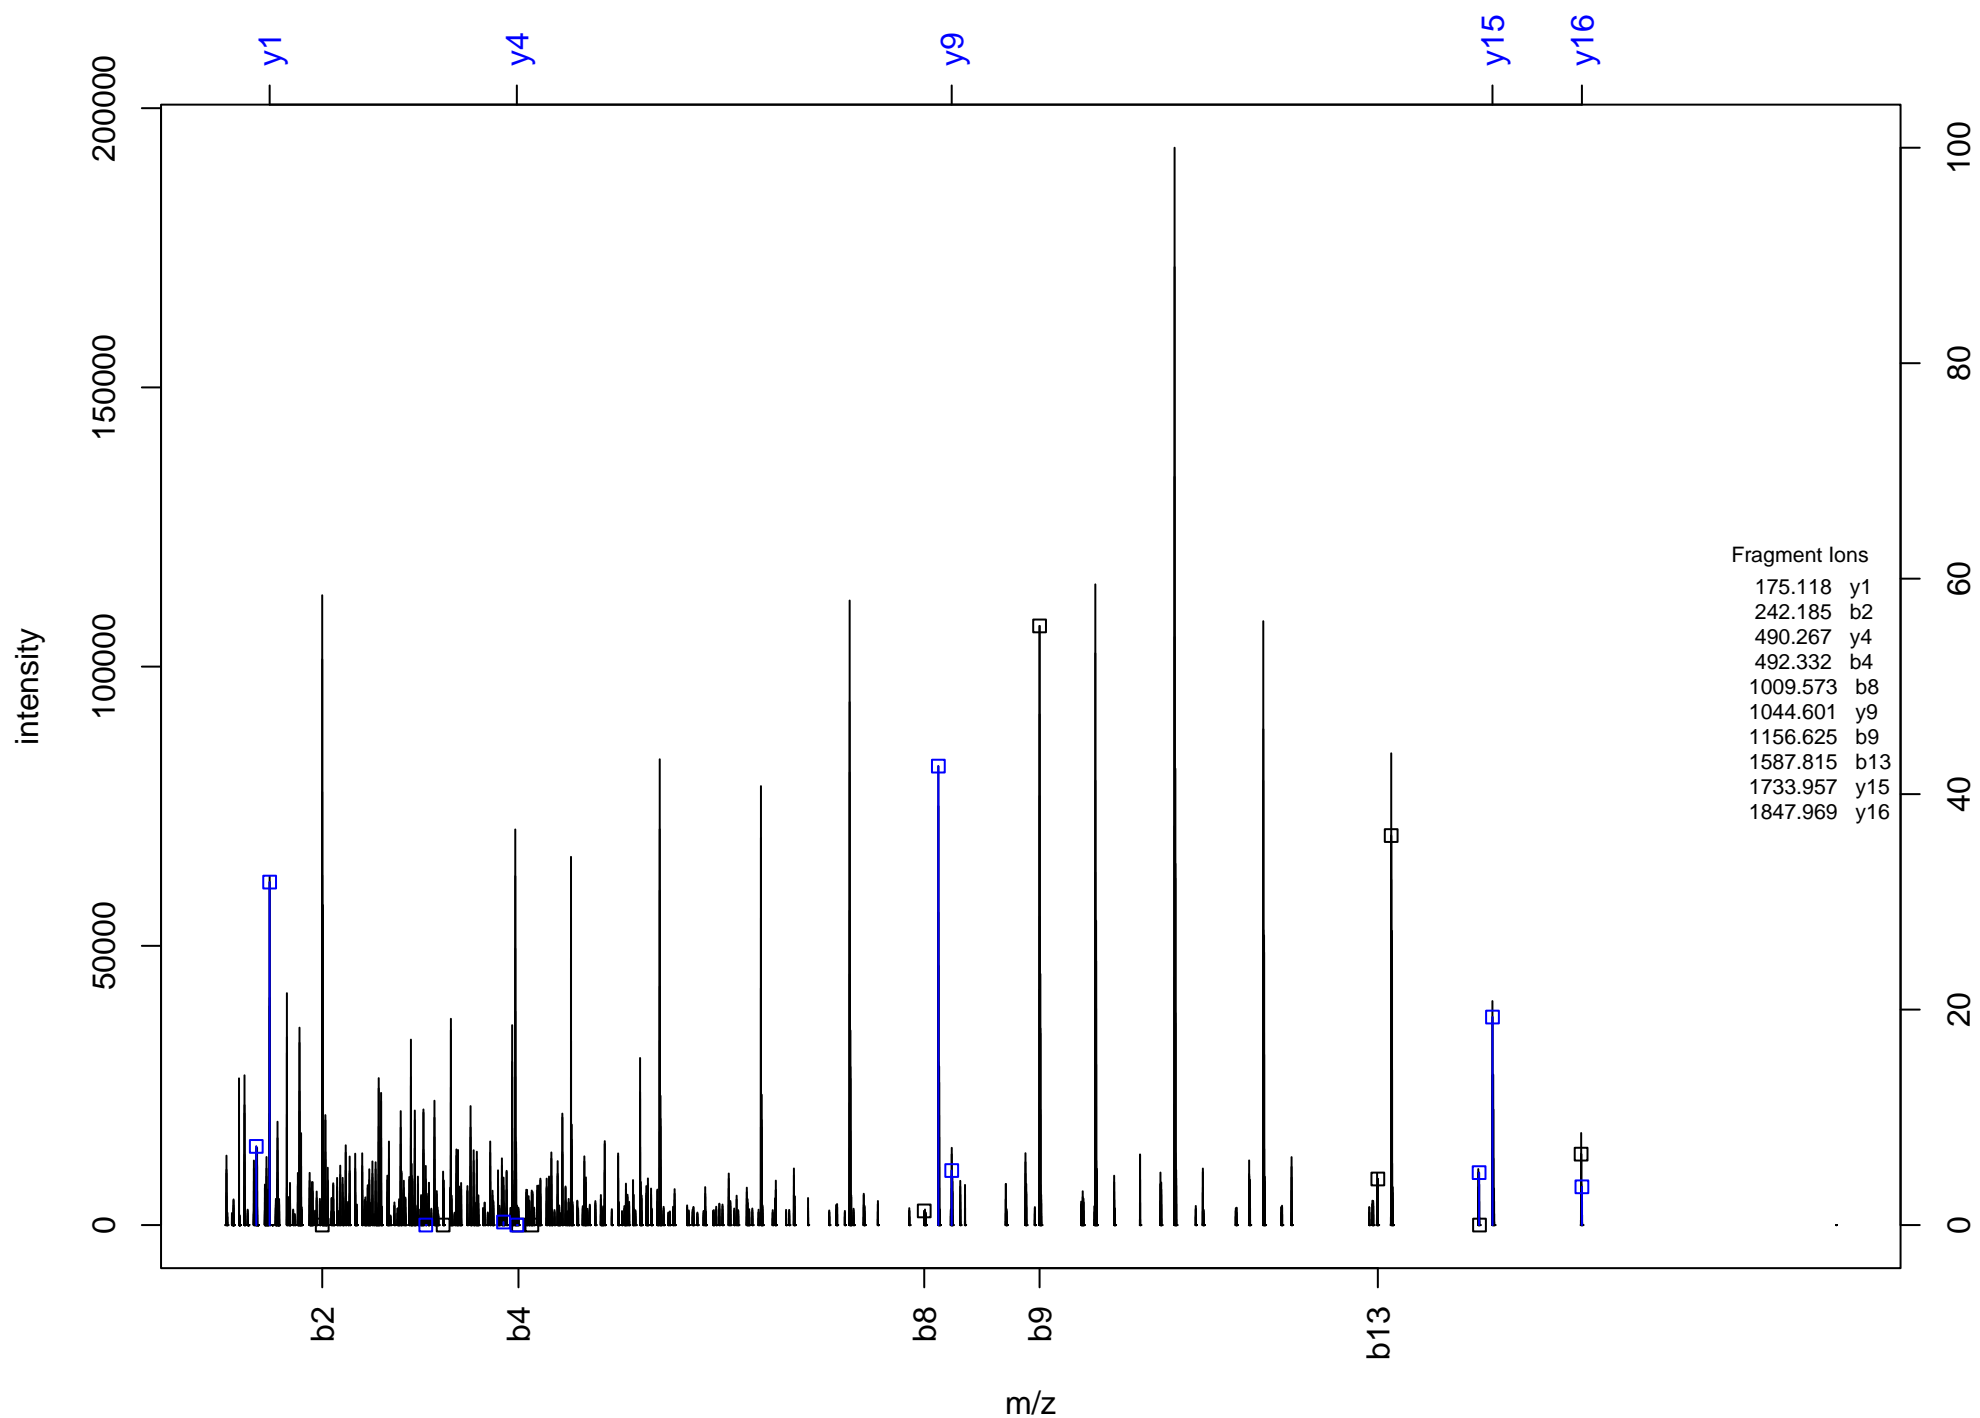

# LN<sup>1</sup>ITEEQQ<sup>1</sup>AVLNRK

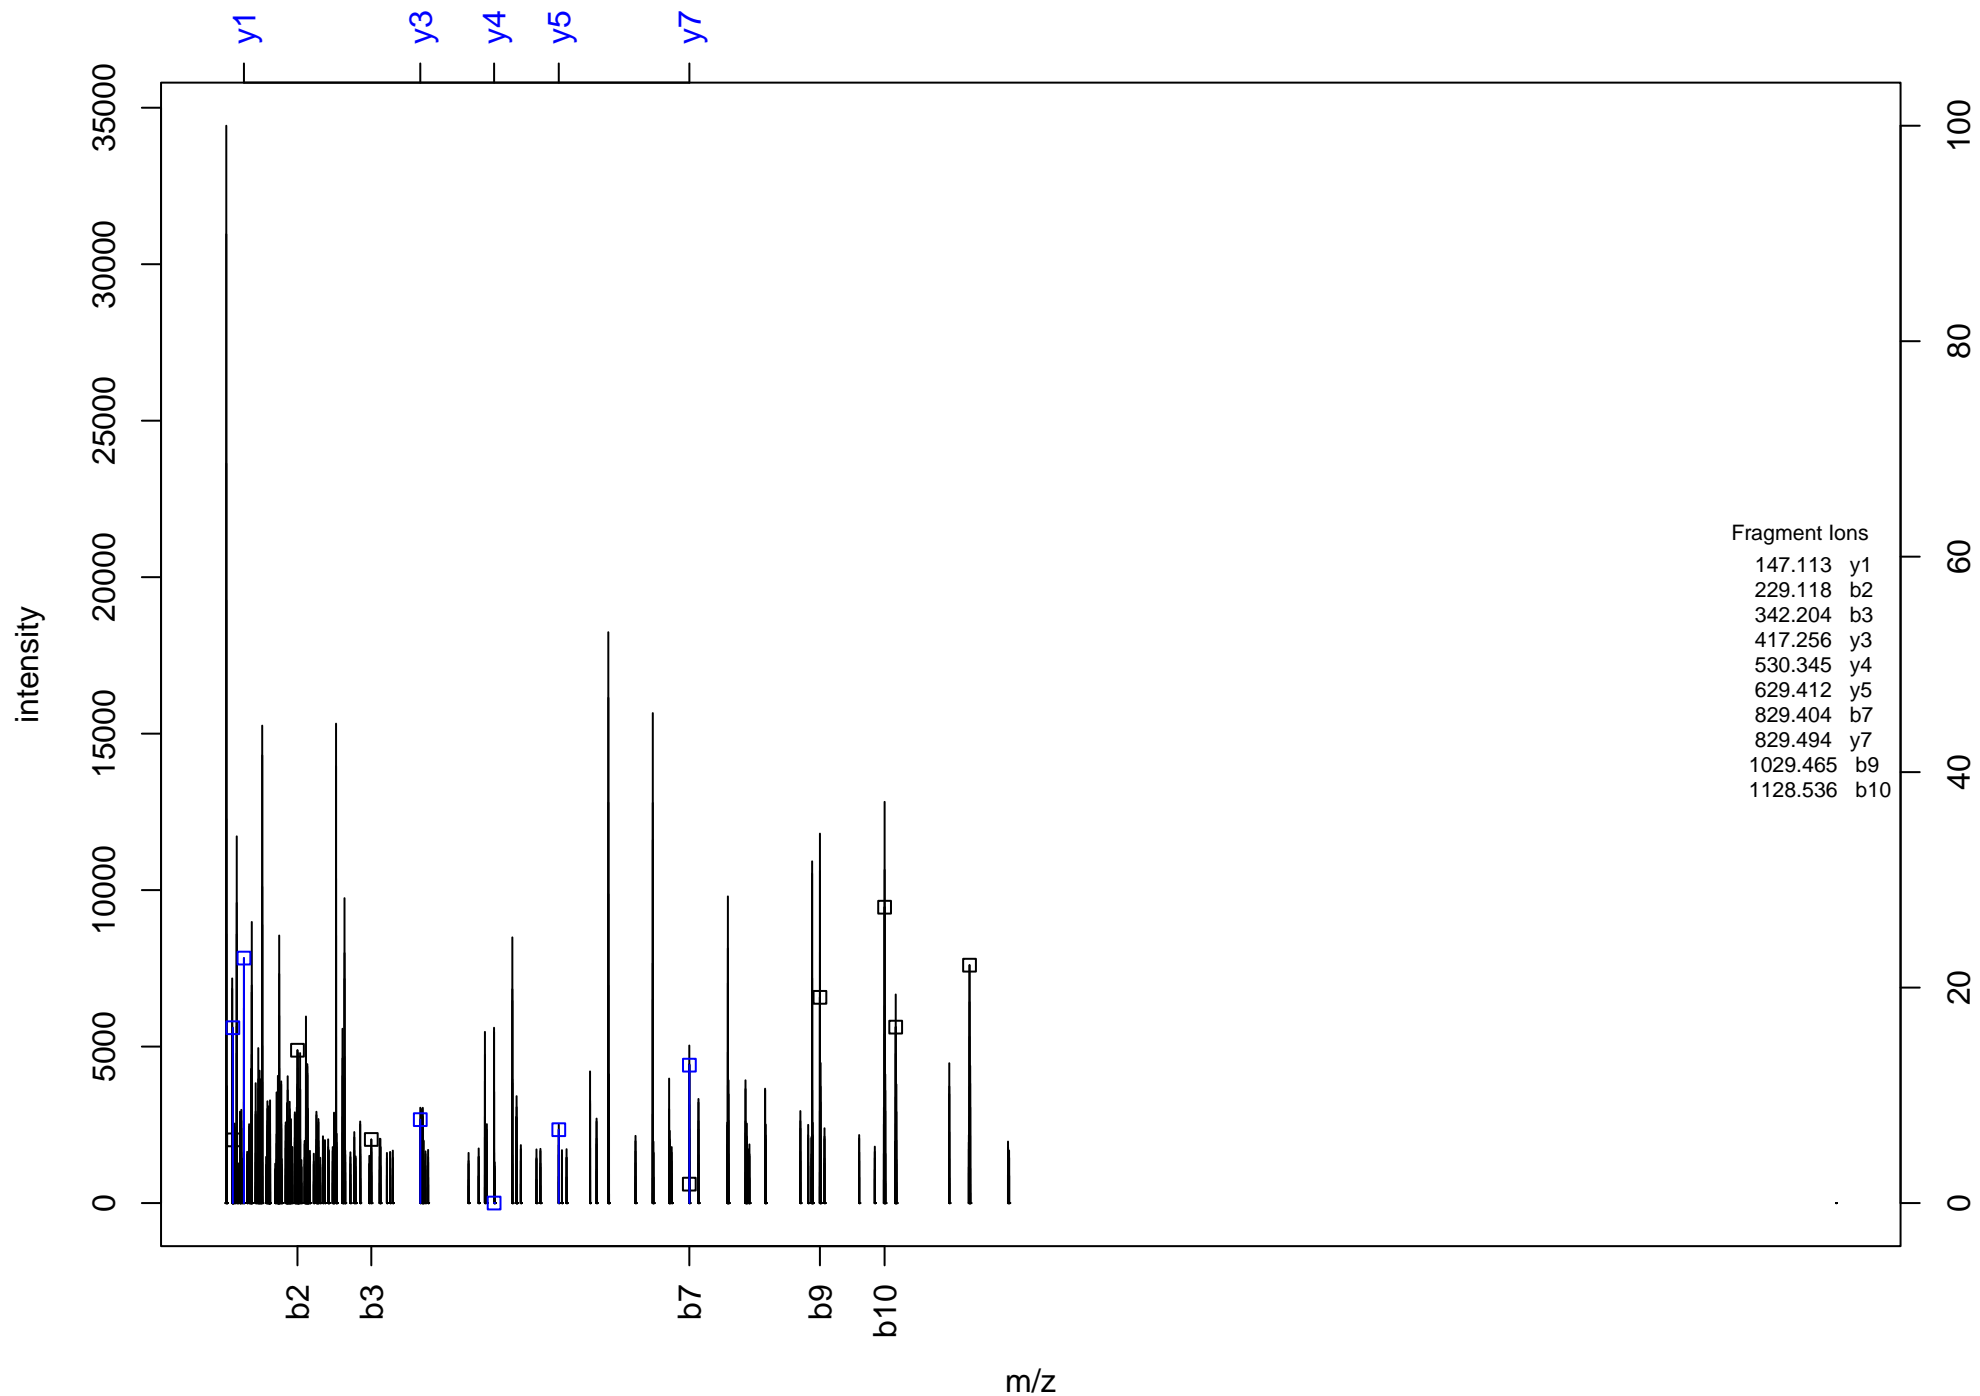

# DN<sup>+</sup>Q<sup>+</sup>RVLVNTK

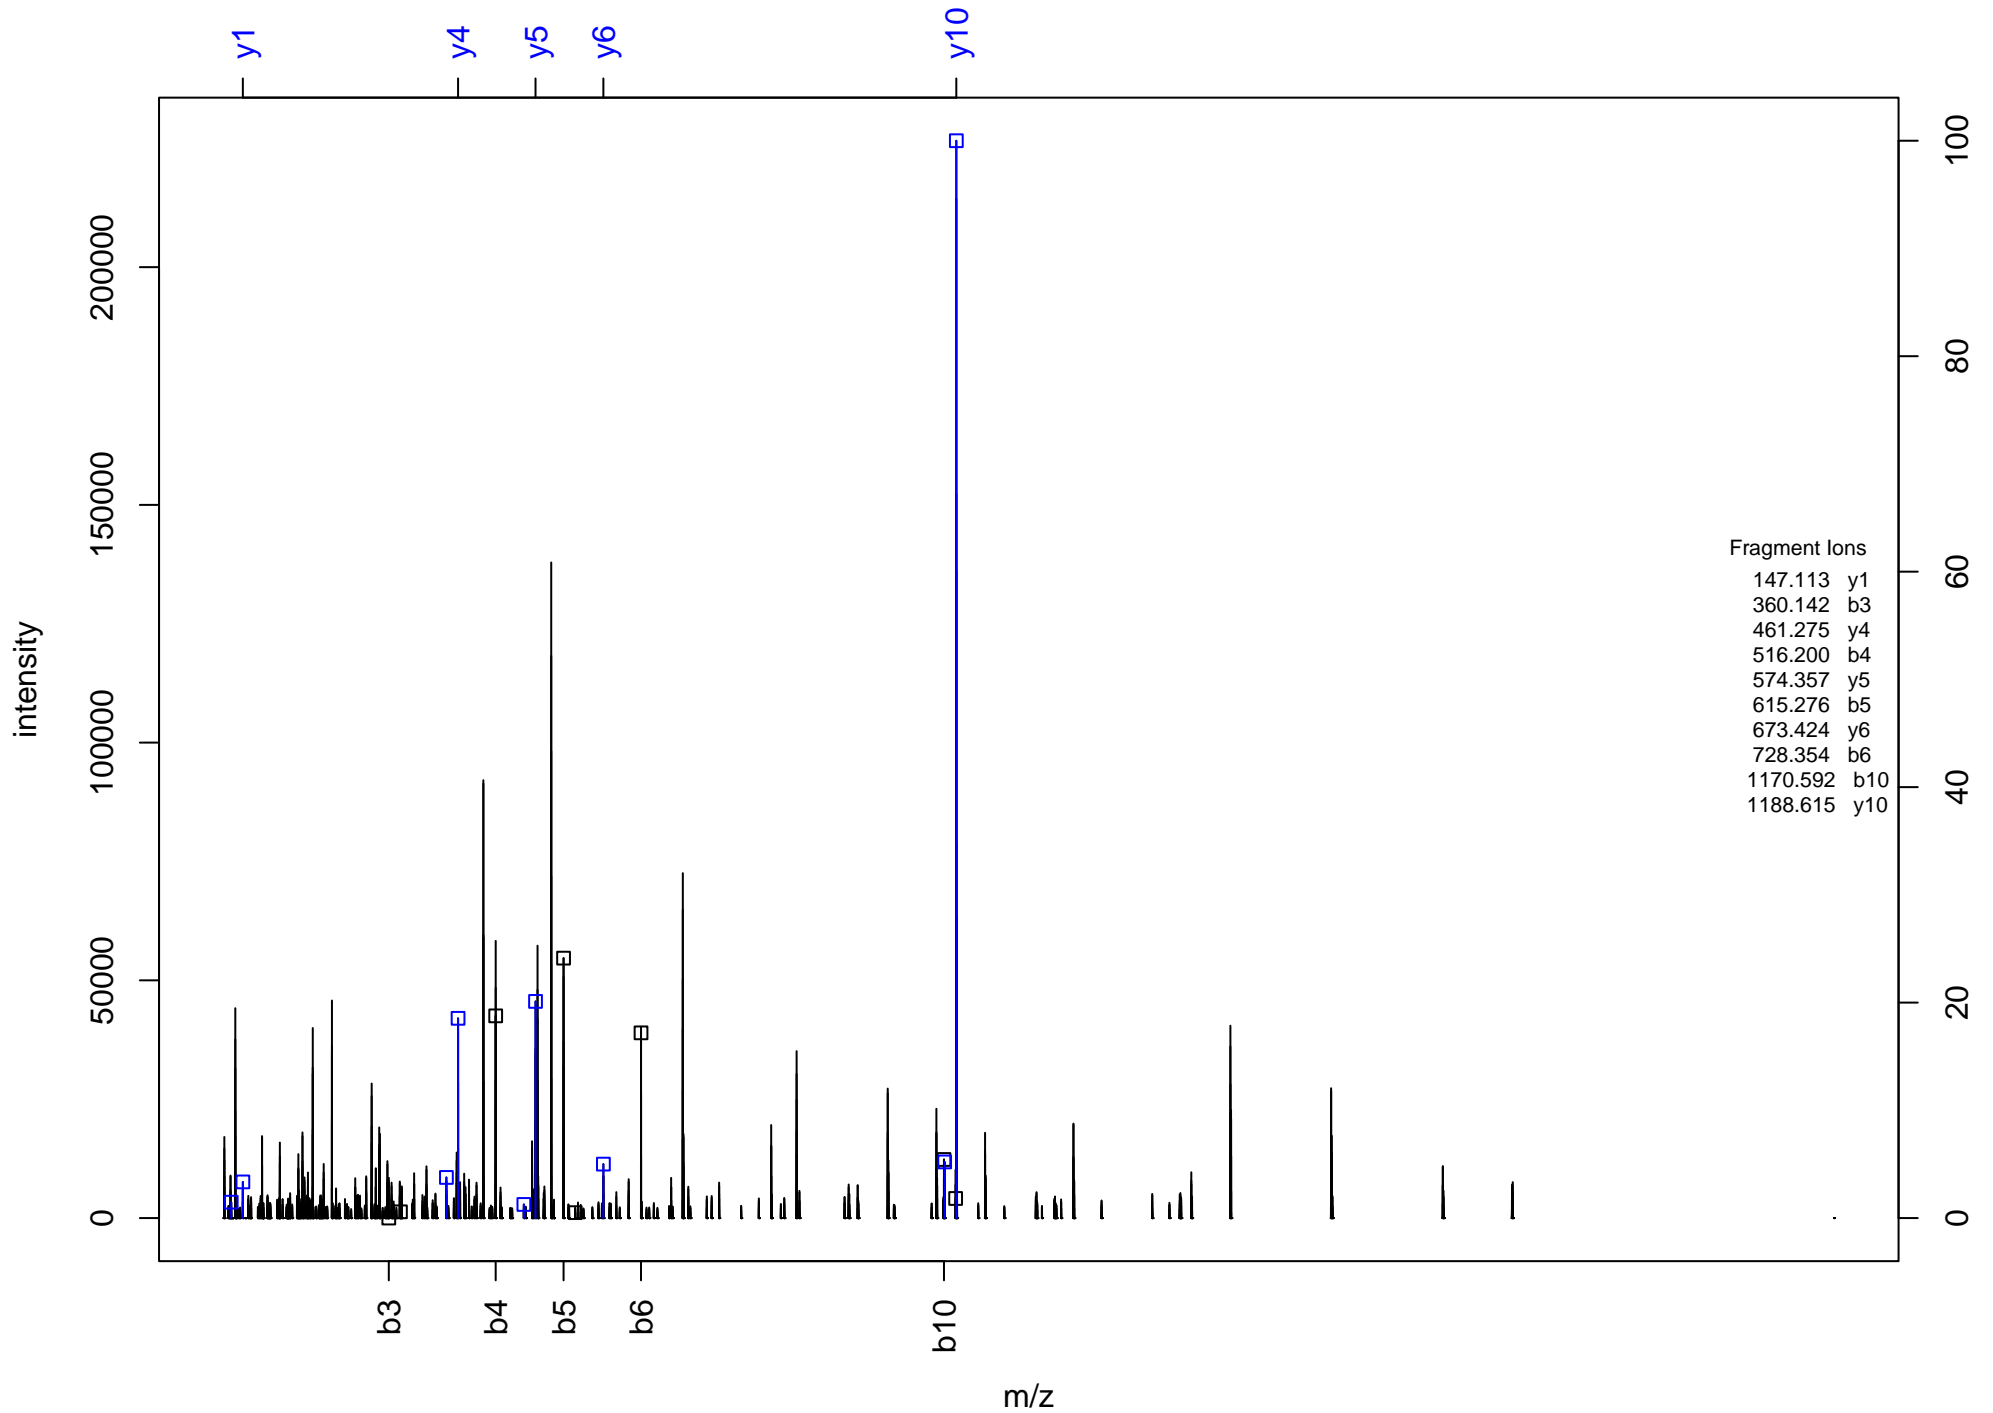

# FQIGDYLDIAITPPNR

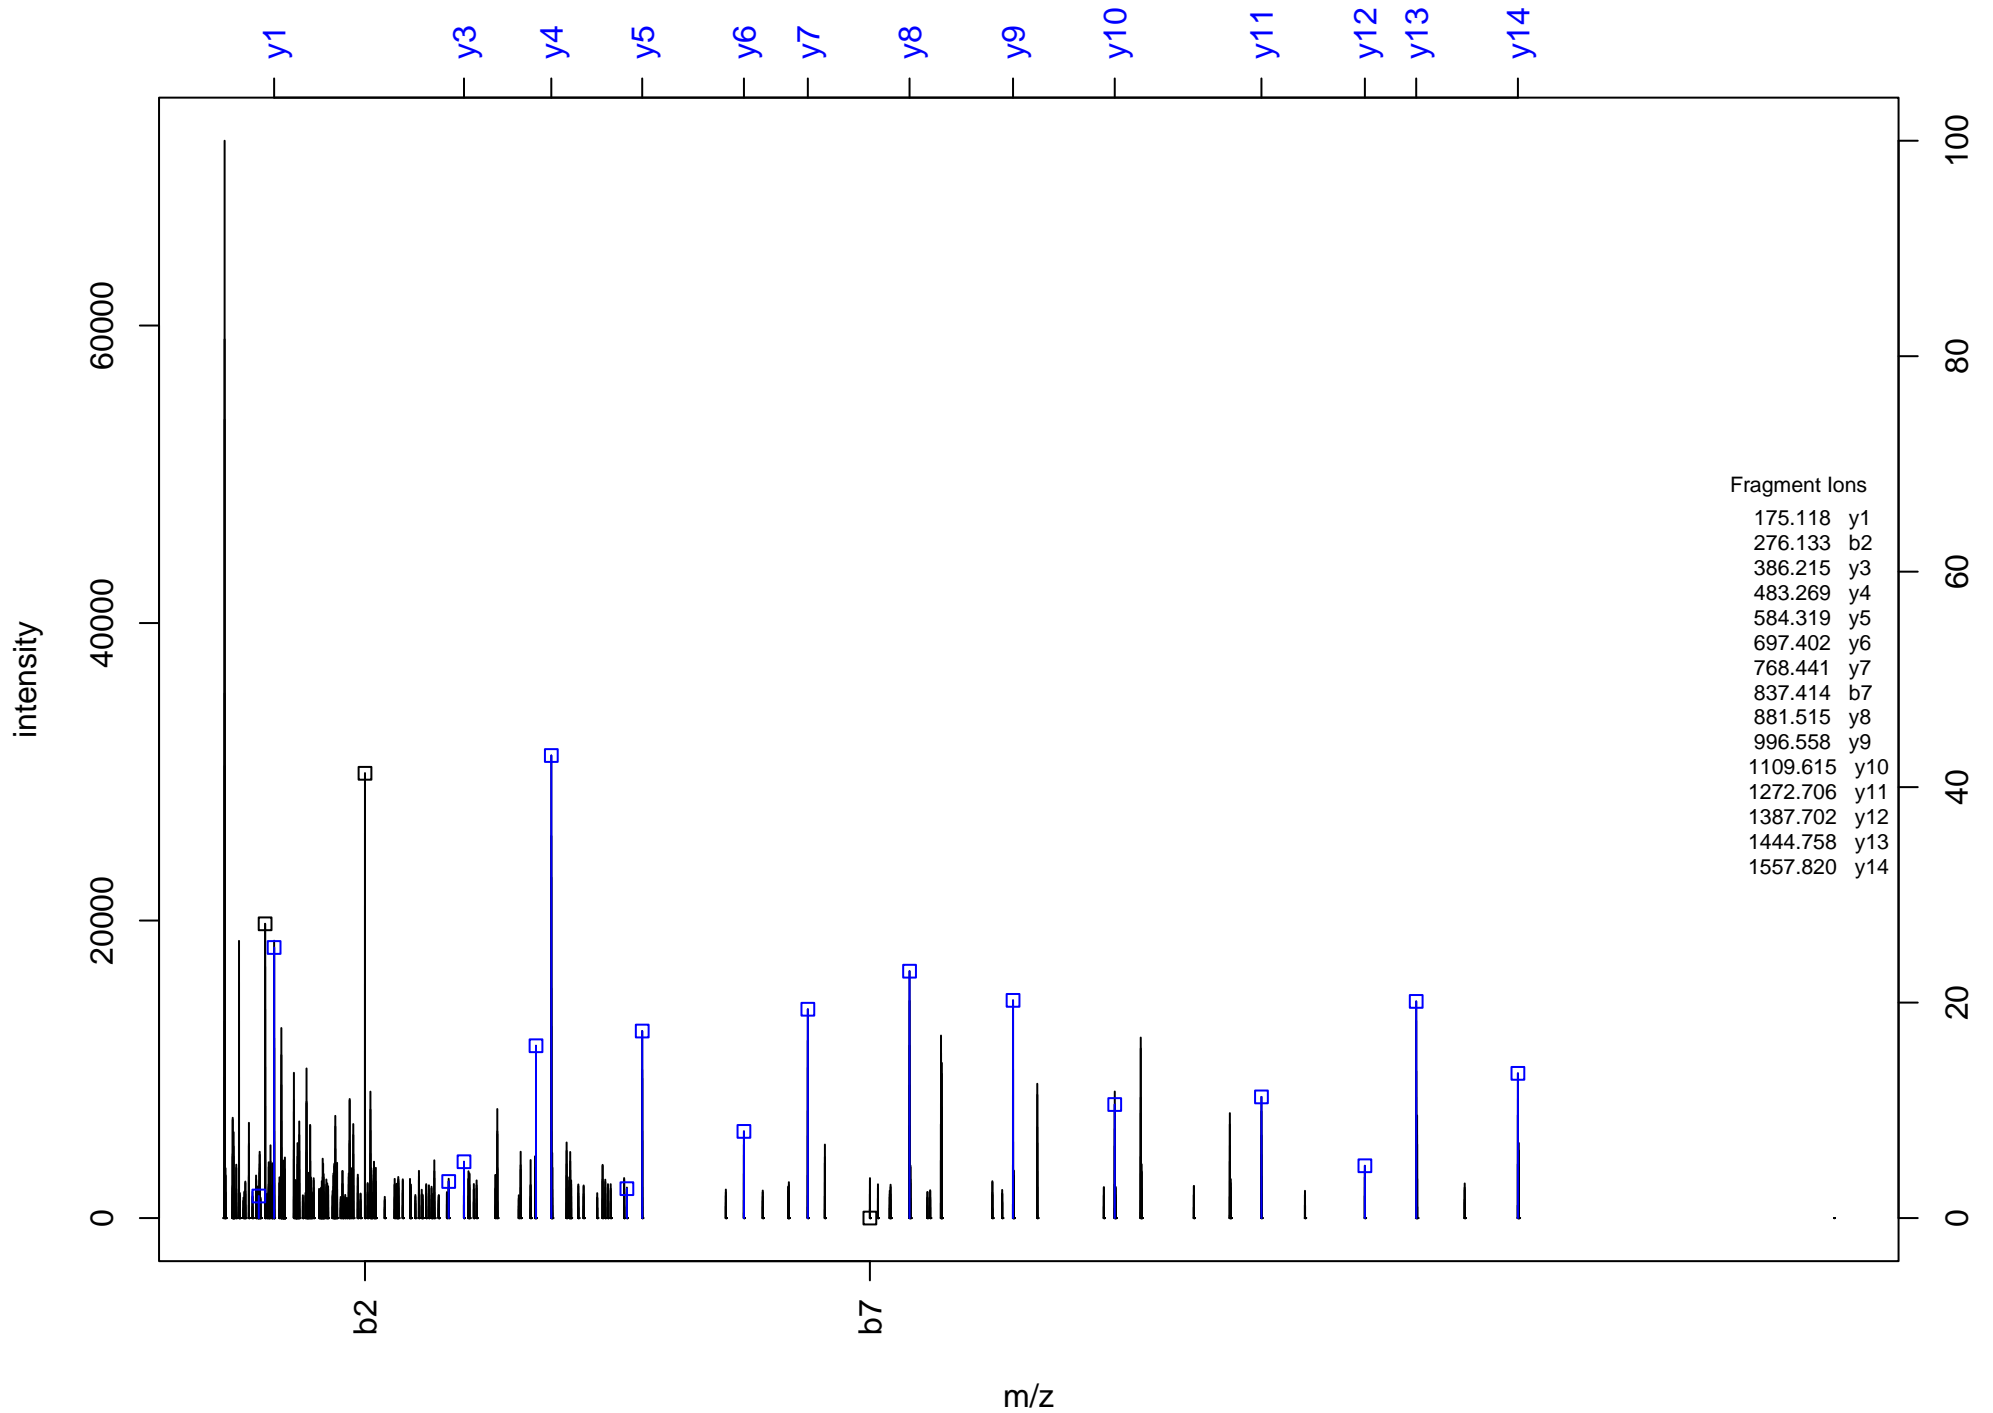

# VPAATSAITNDGIGINPAQTAGNVFLK

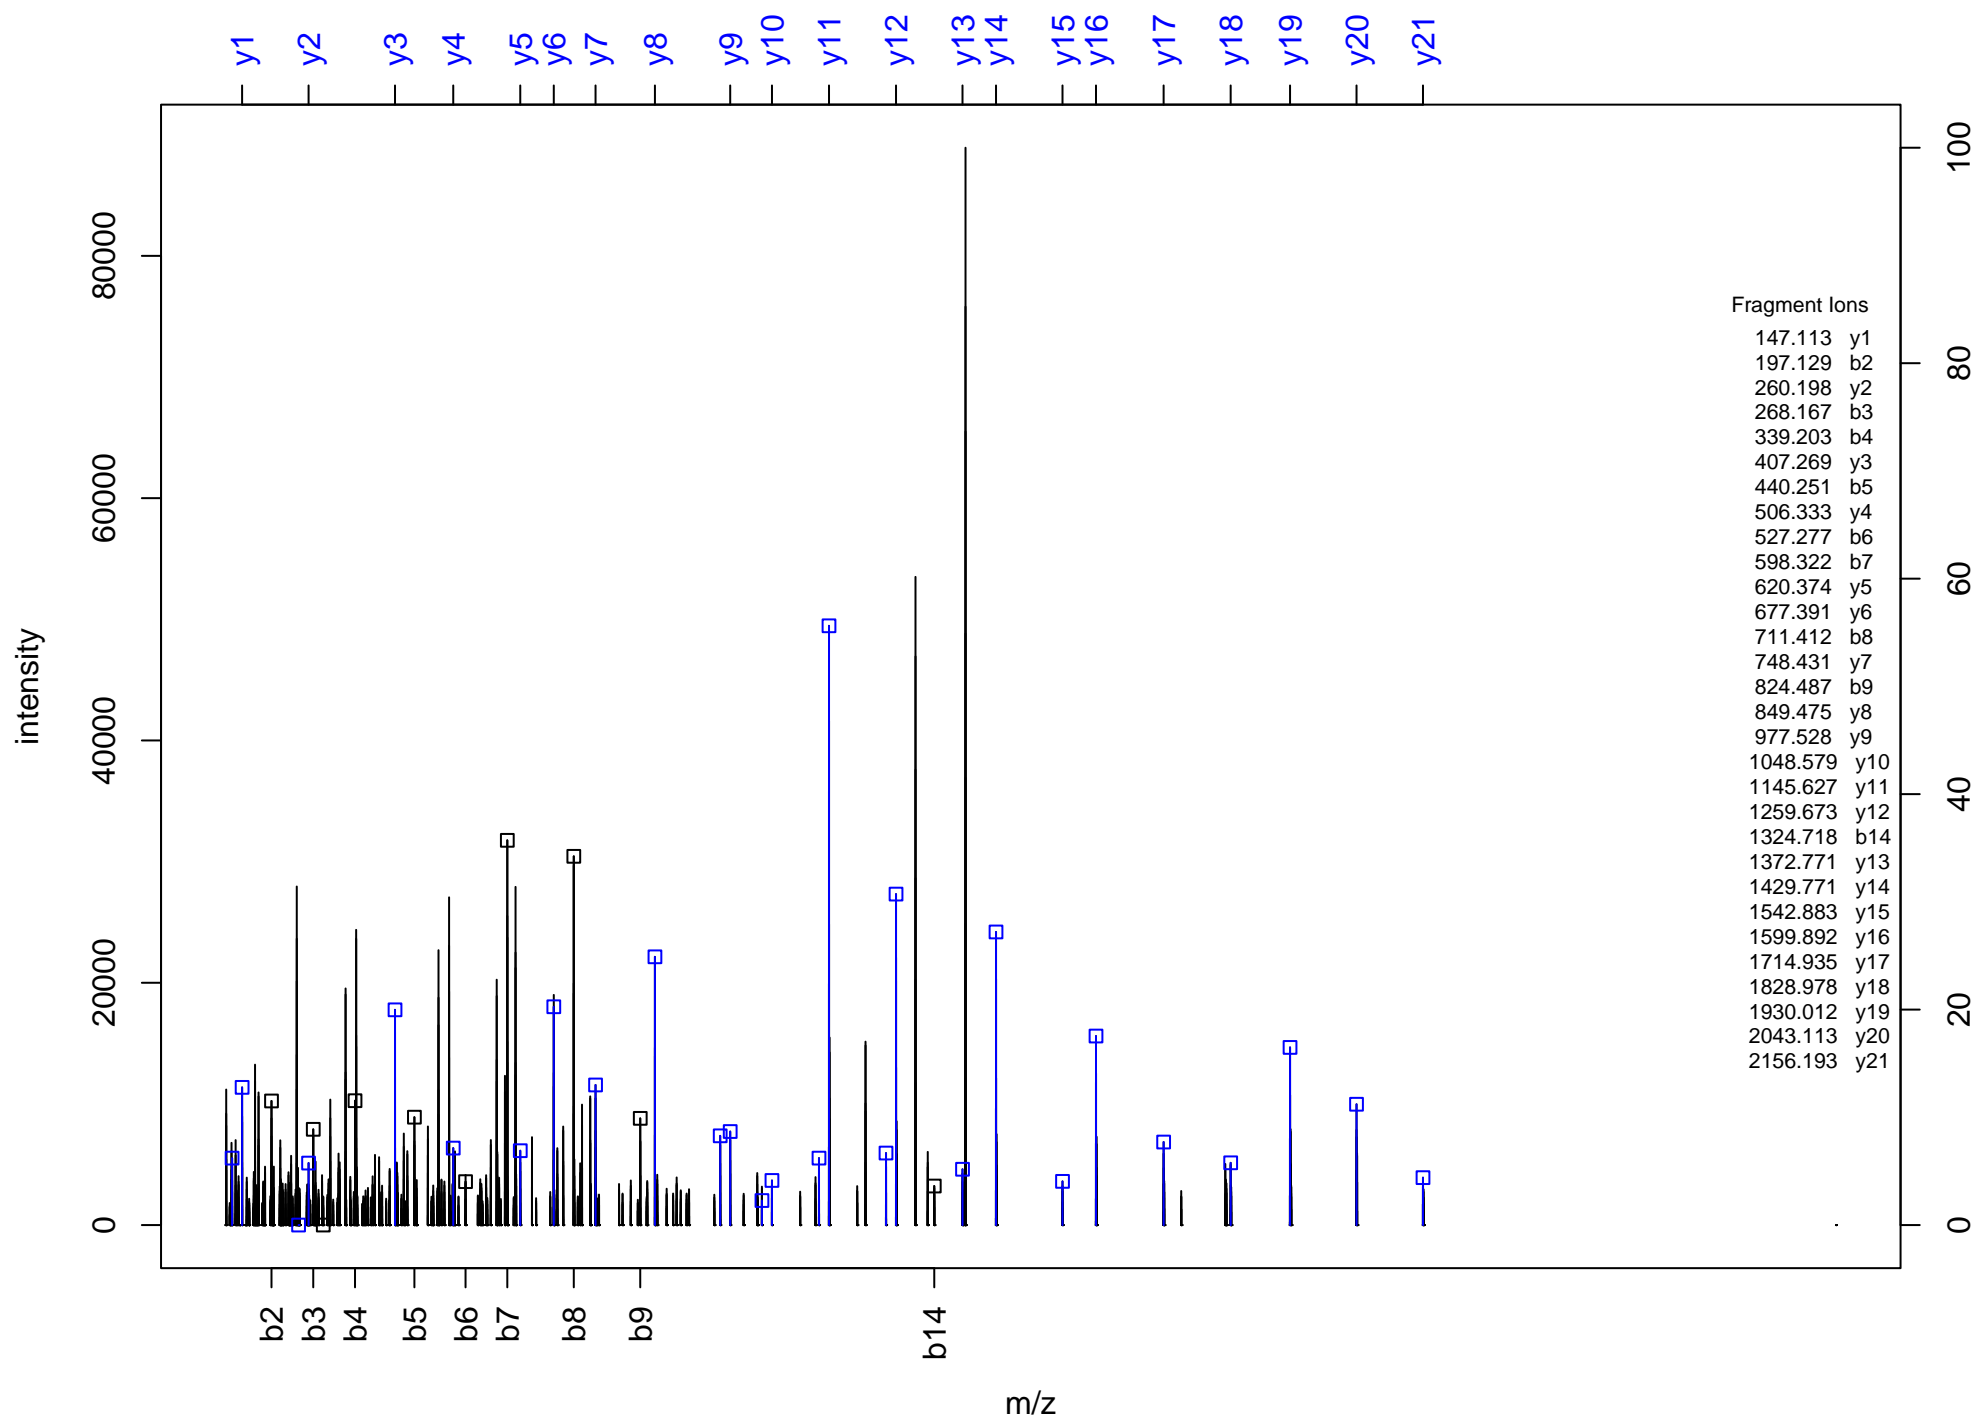

# RLQEDPPVGVSGAPSENNIMQWNAVIFGPEGTPFEDGTFK

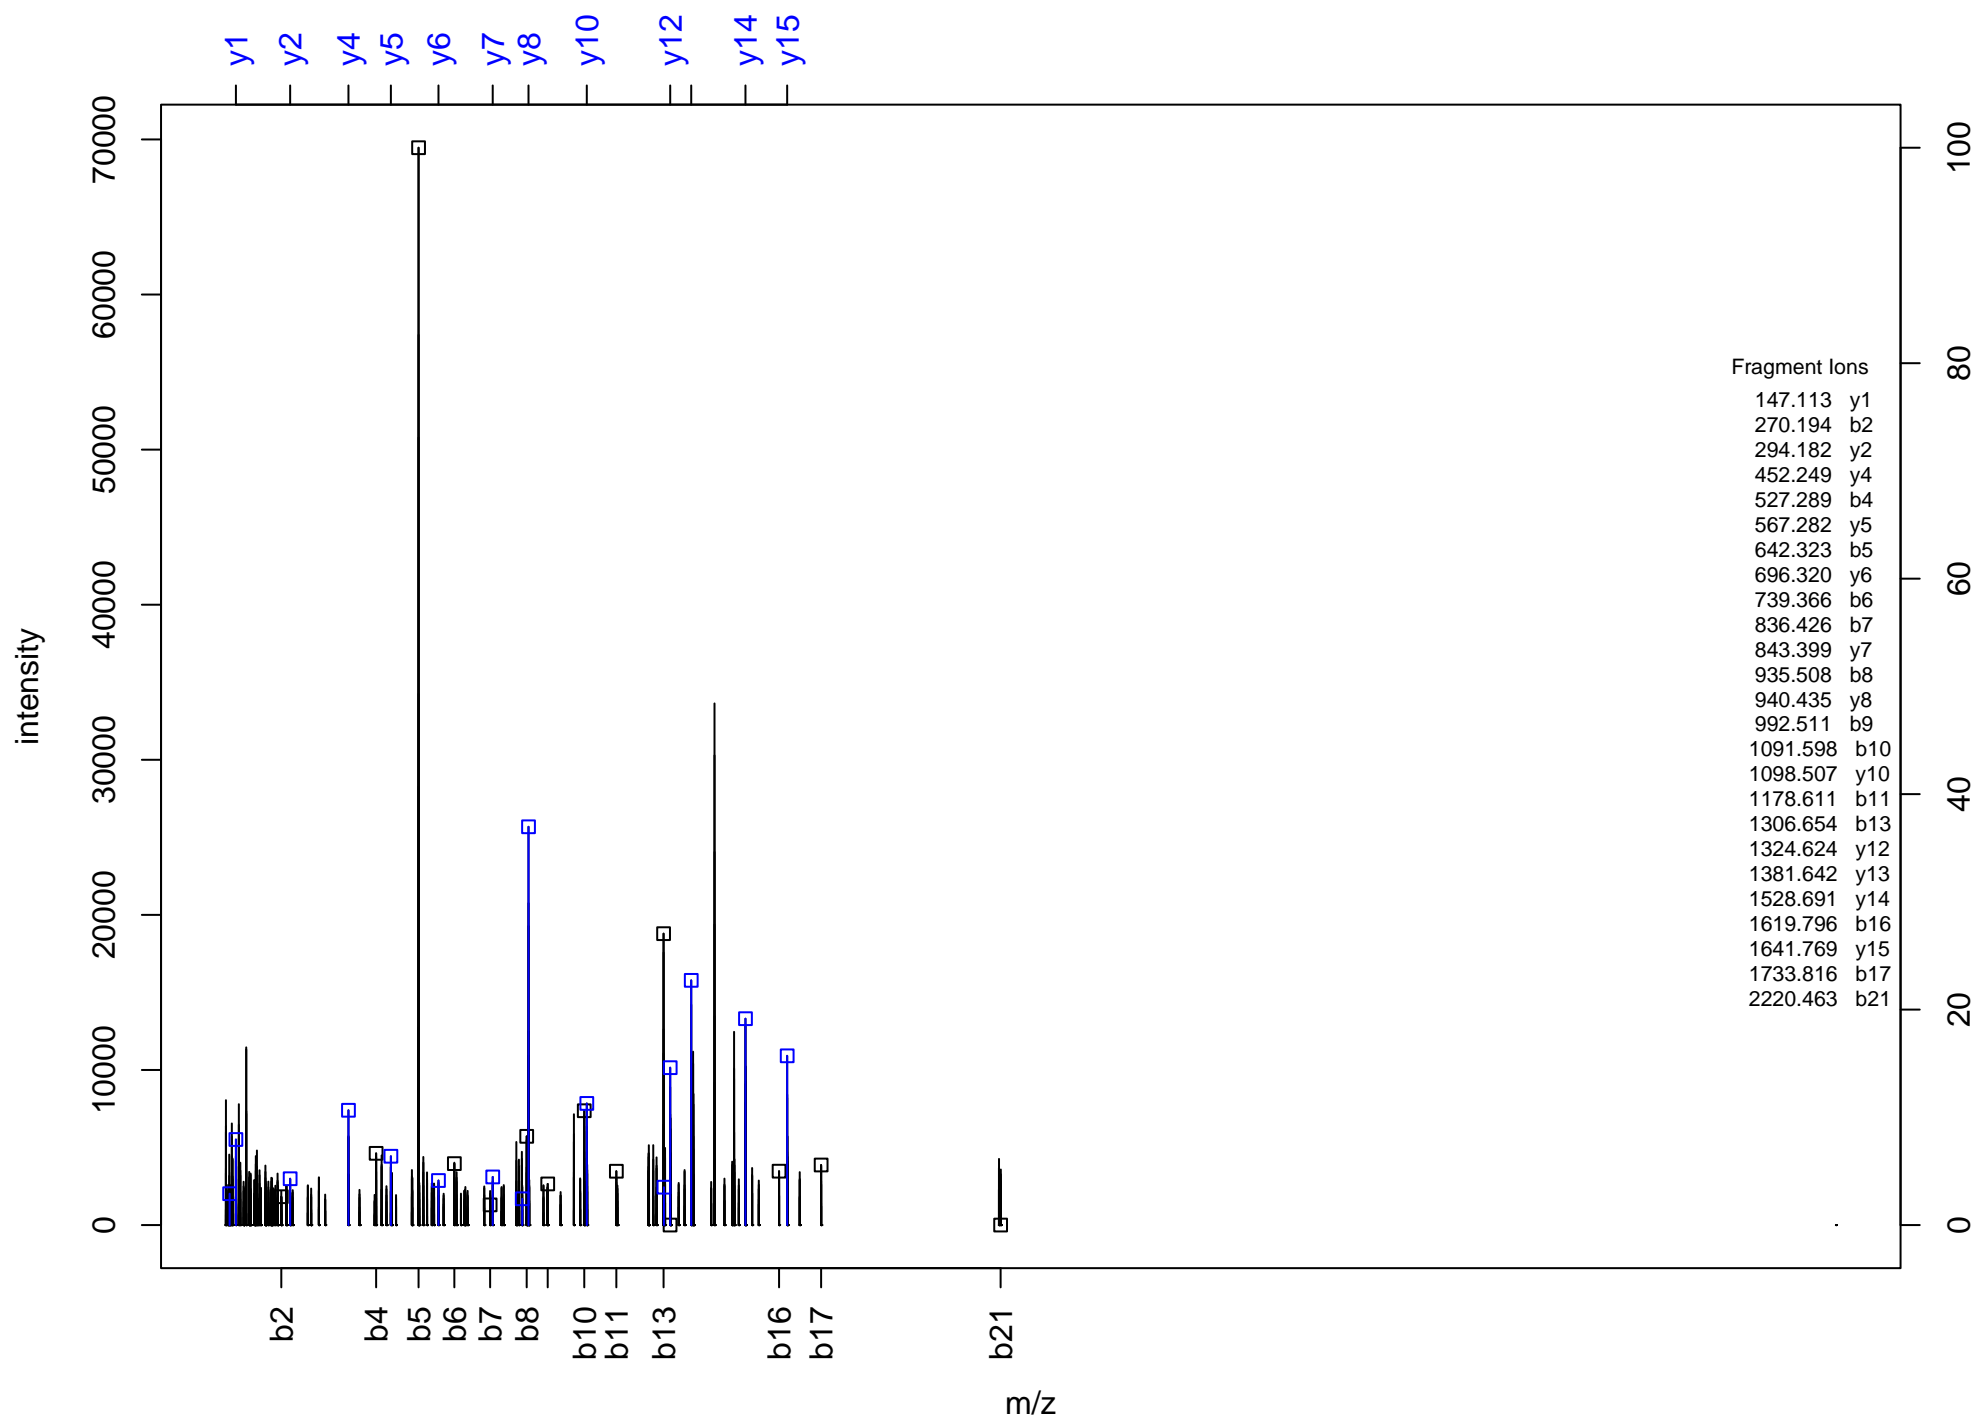



# ILGSLYAASEDQEK

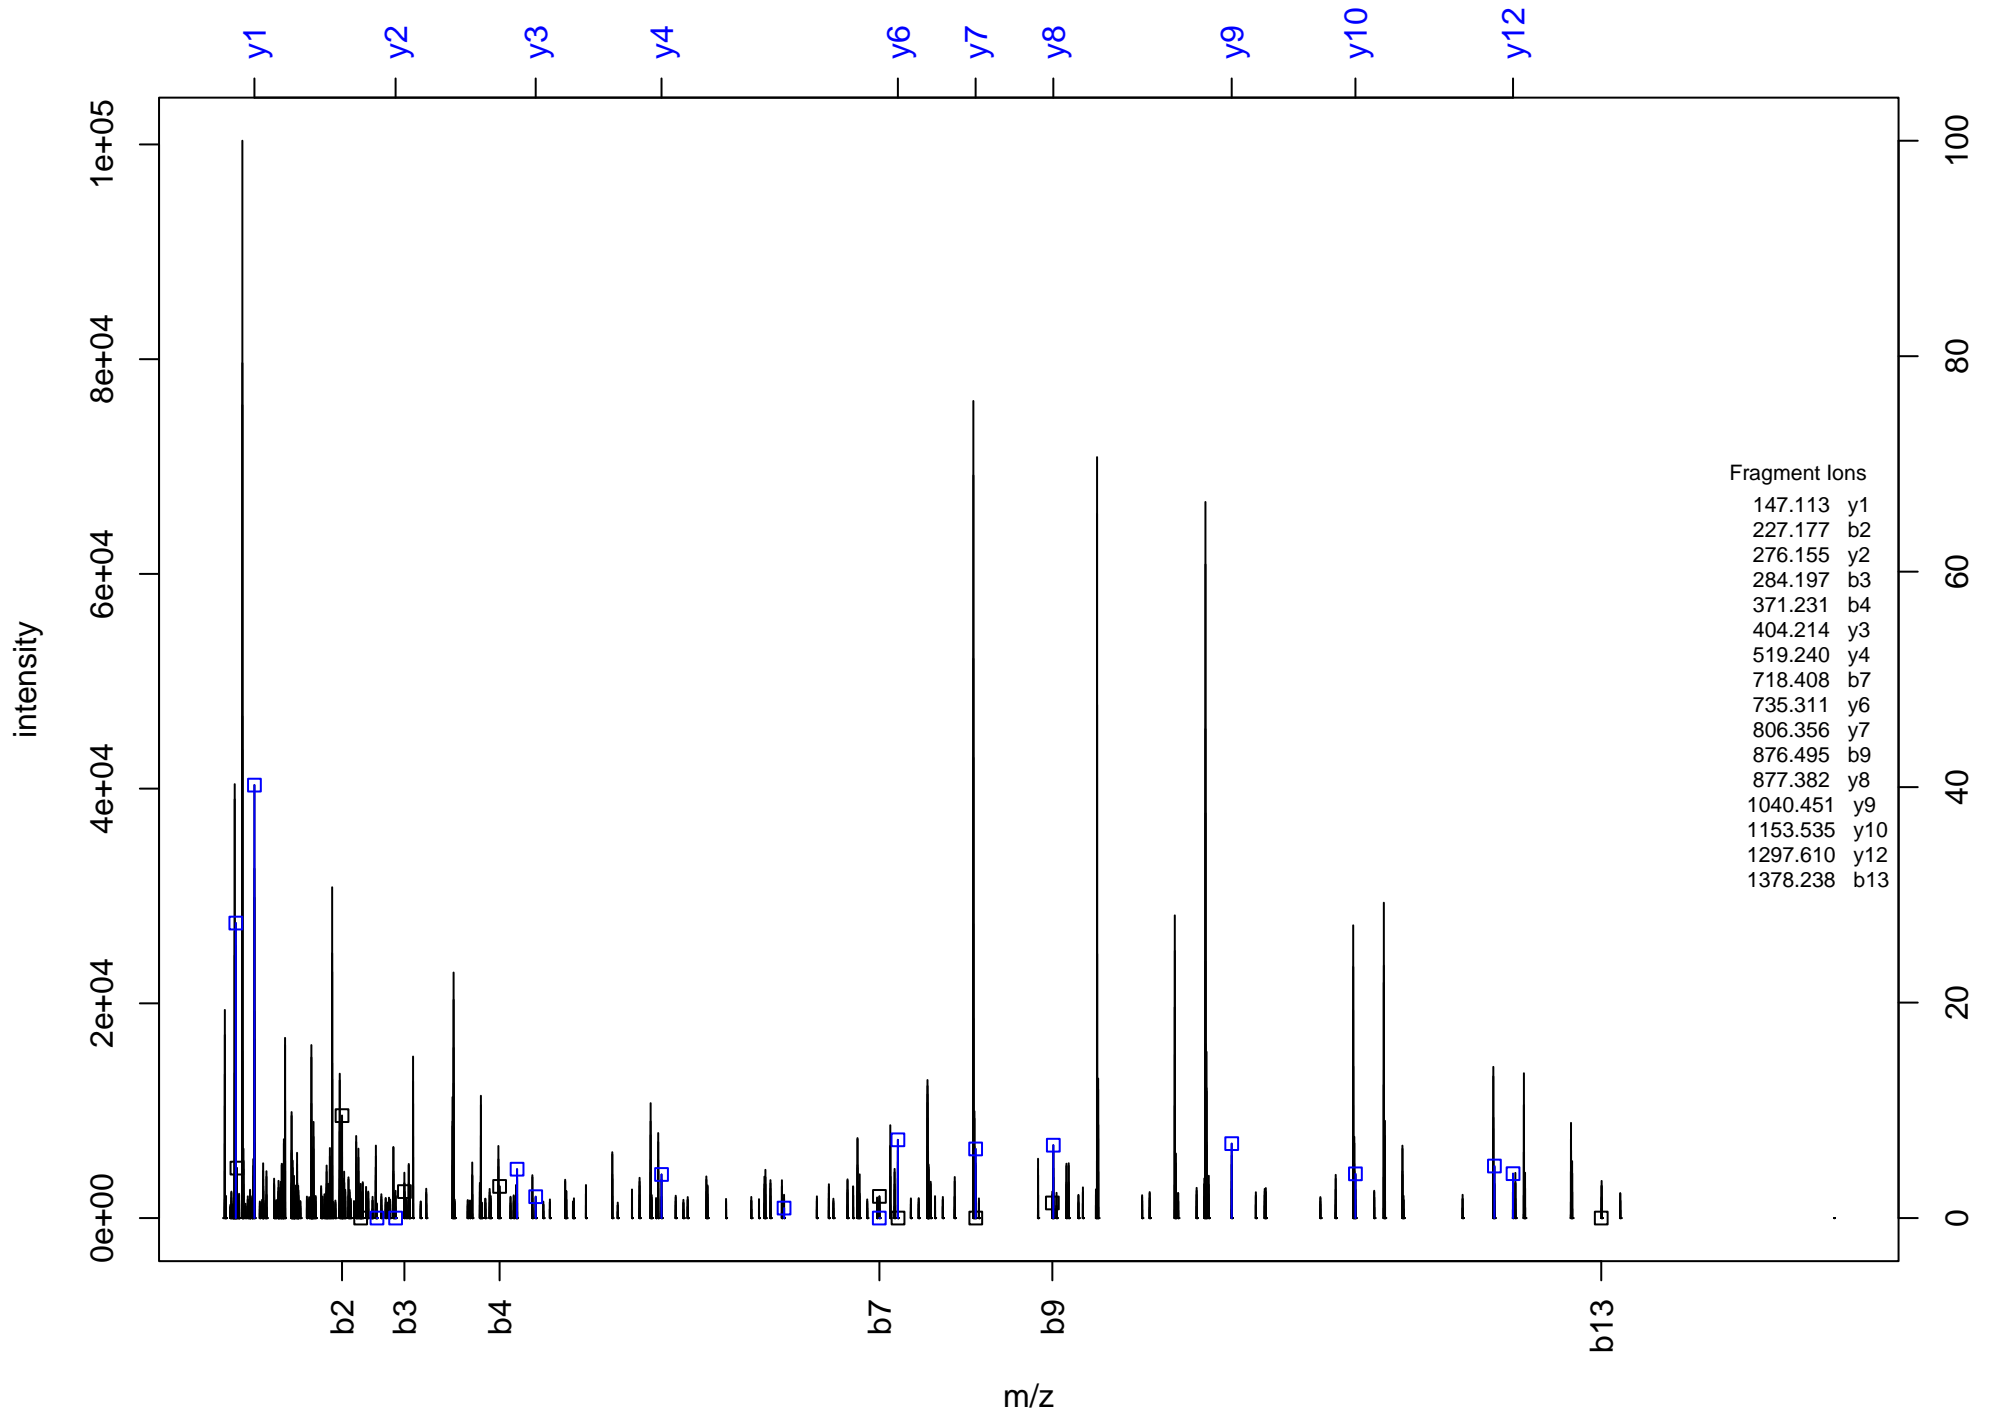

# DPLMQEPPVWFK

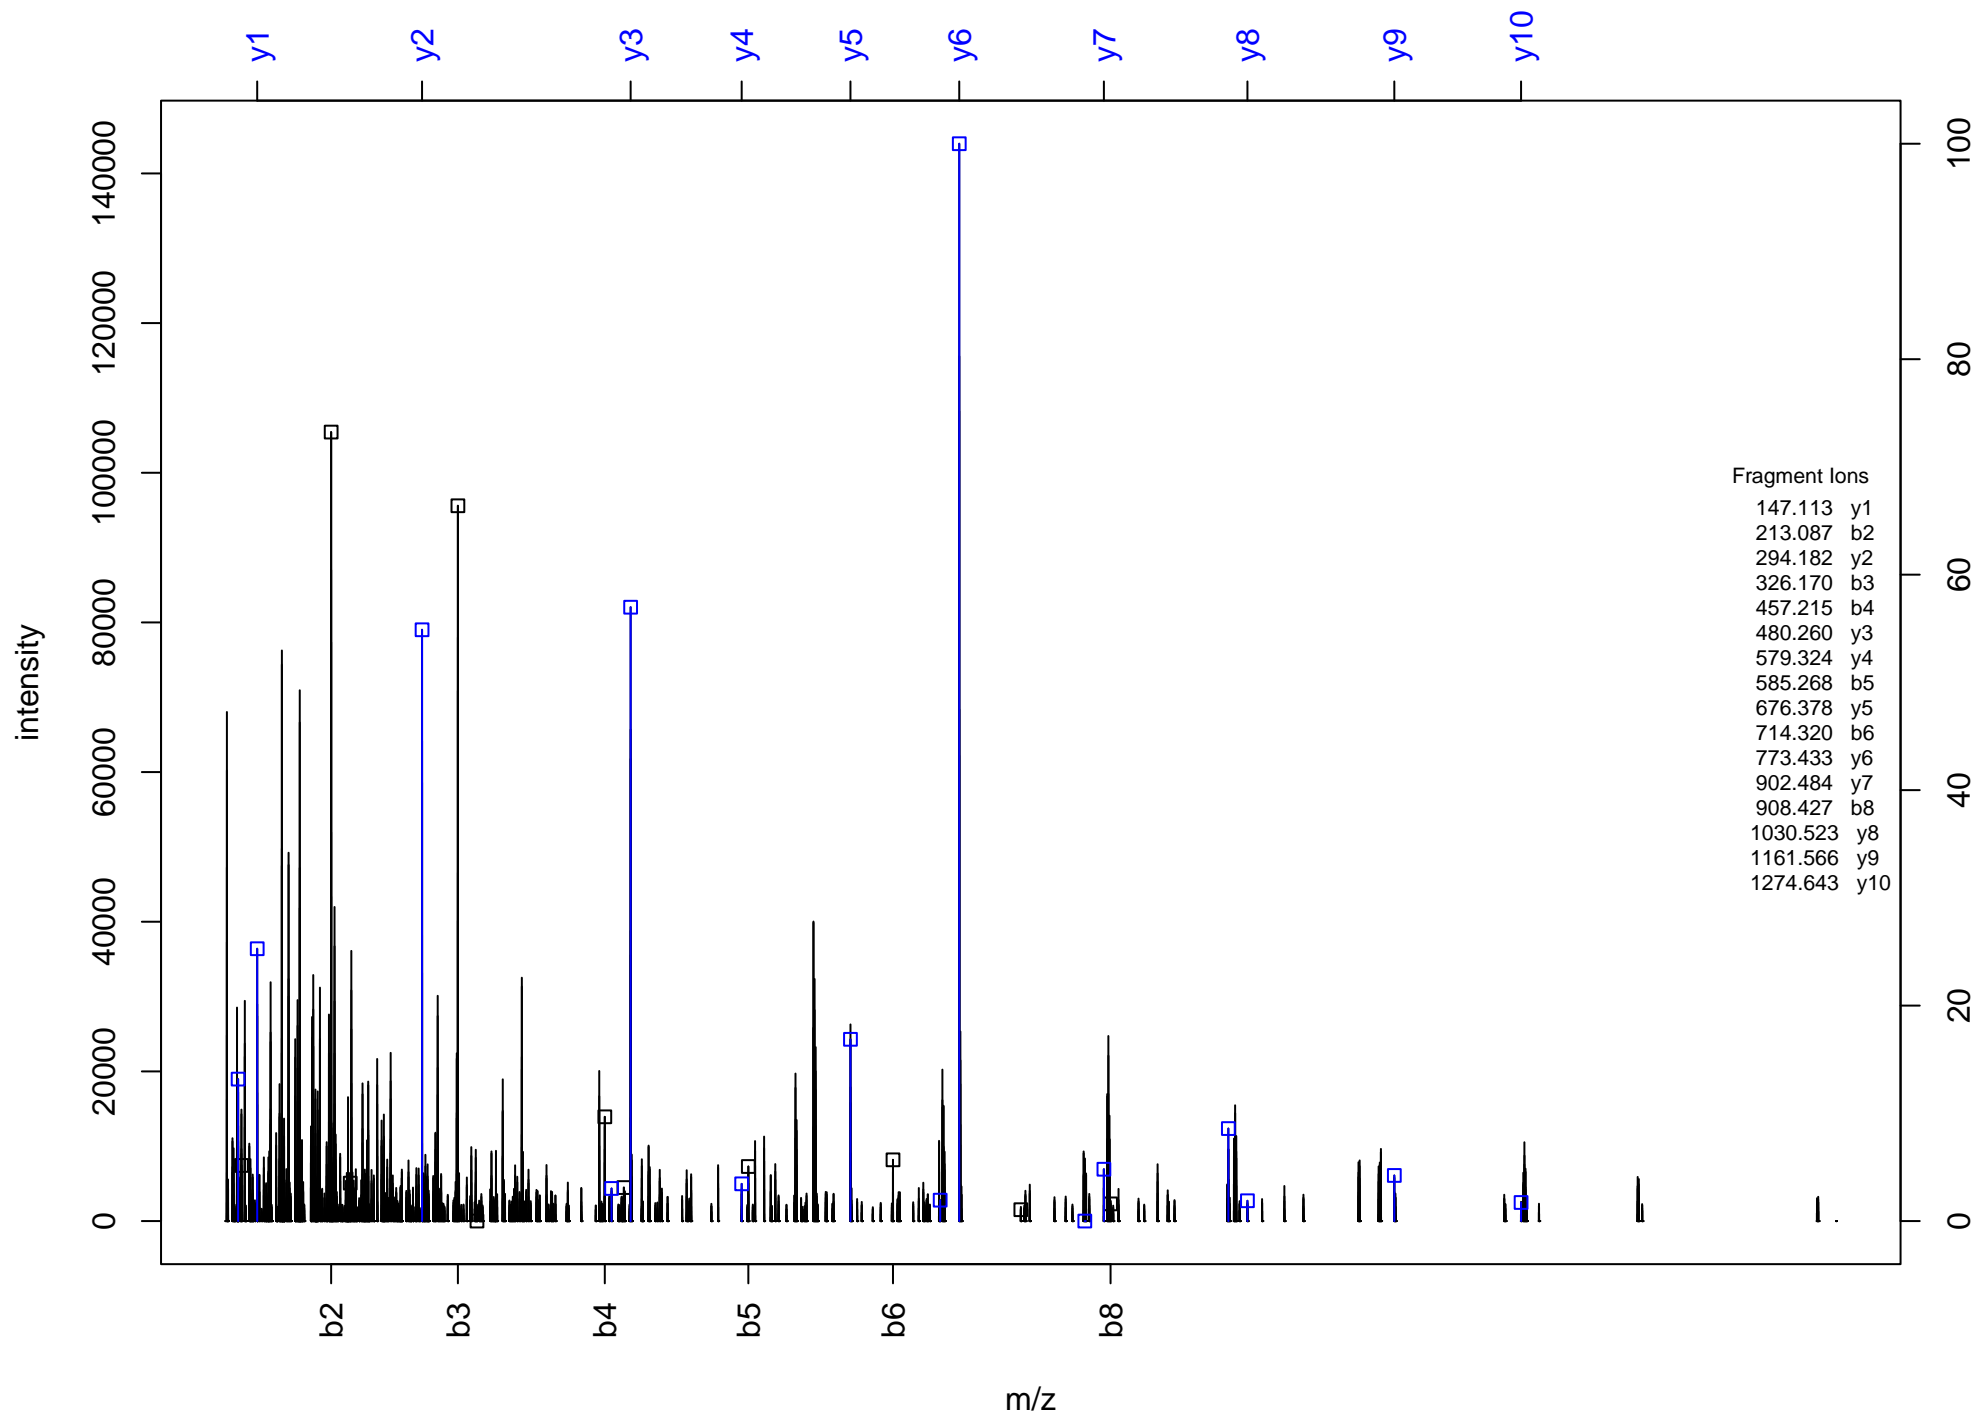

# FSVLVPLLAR

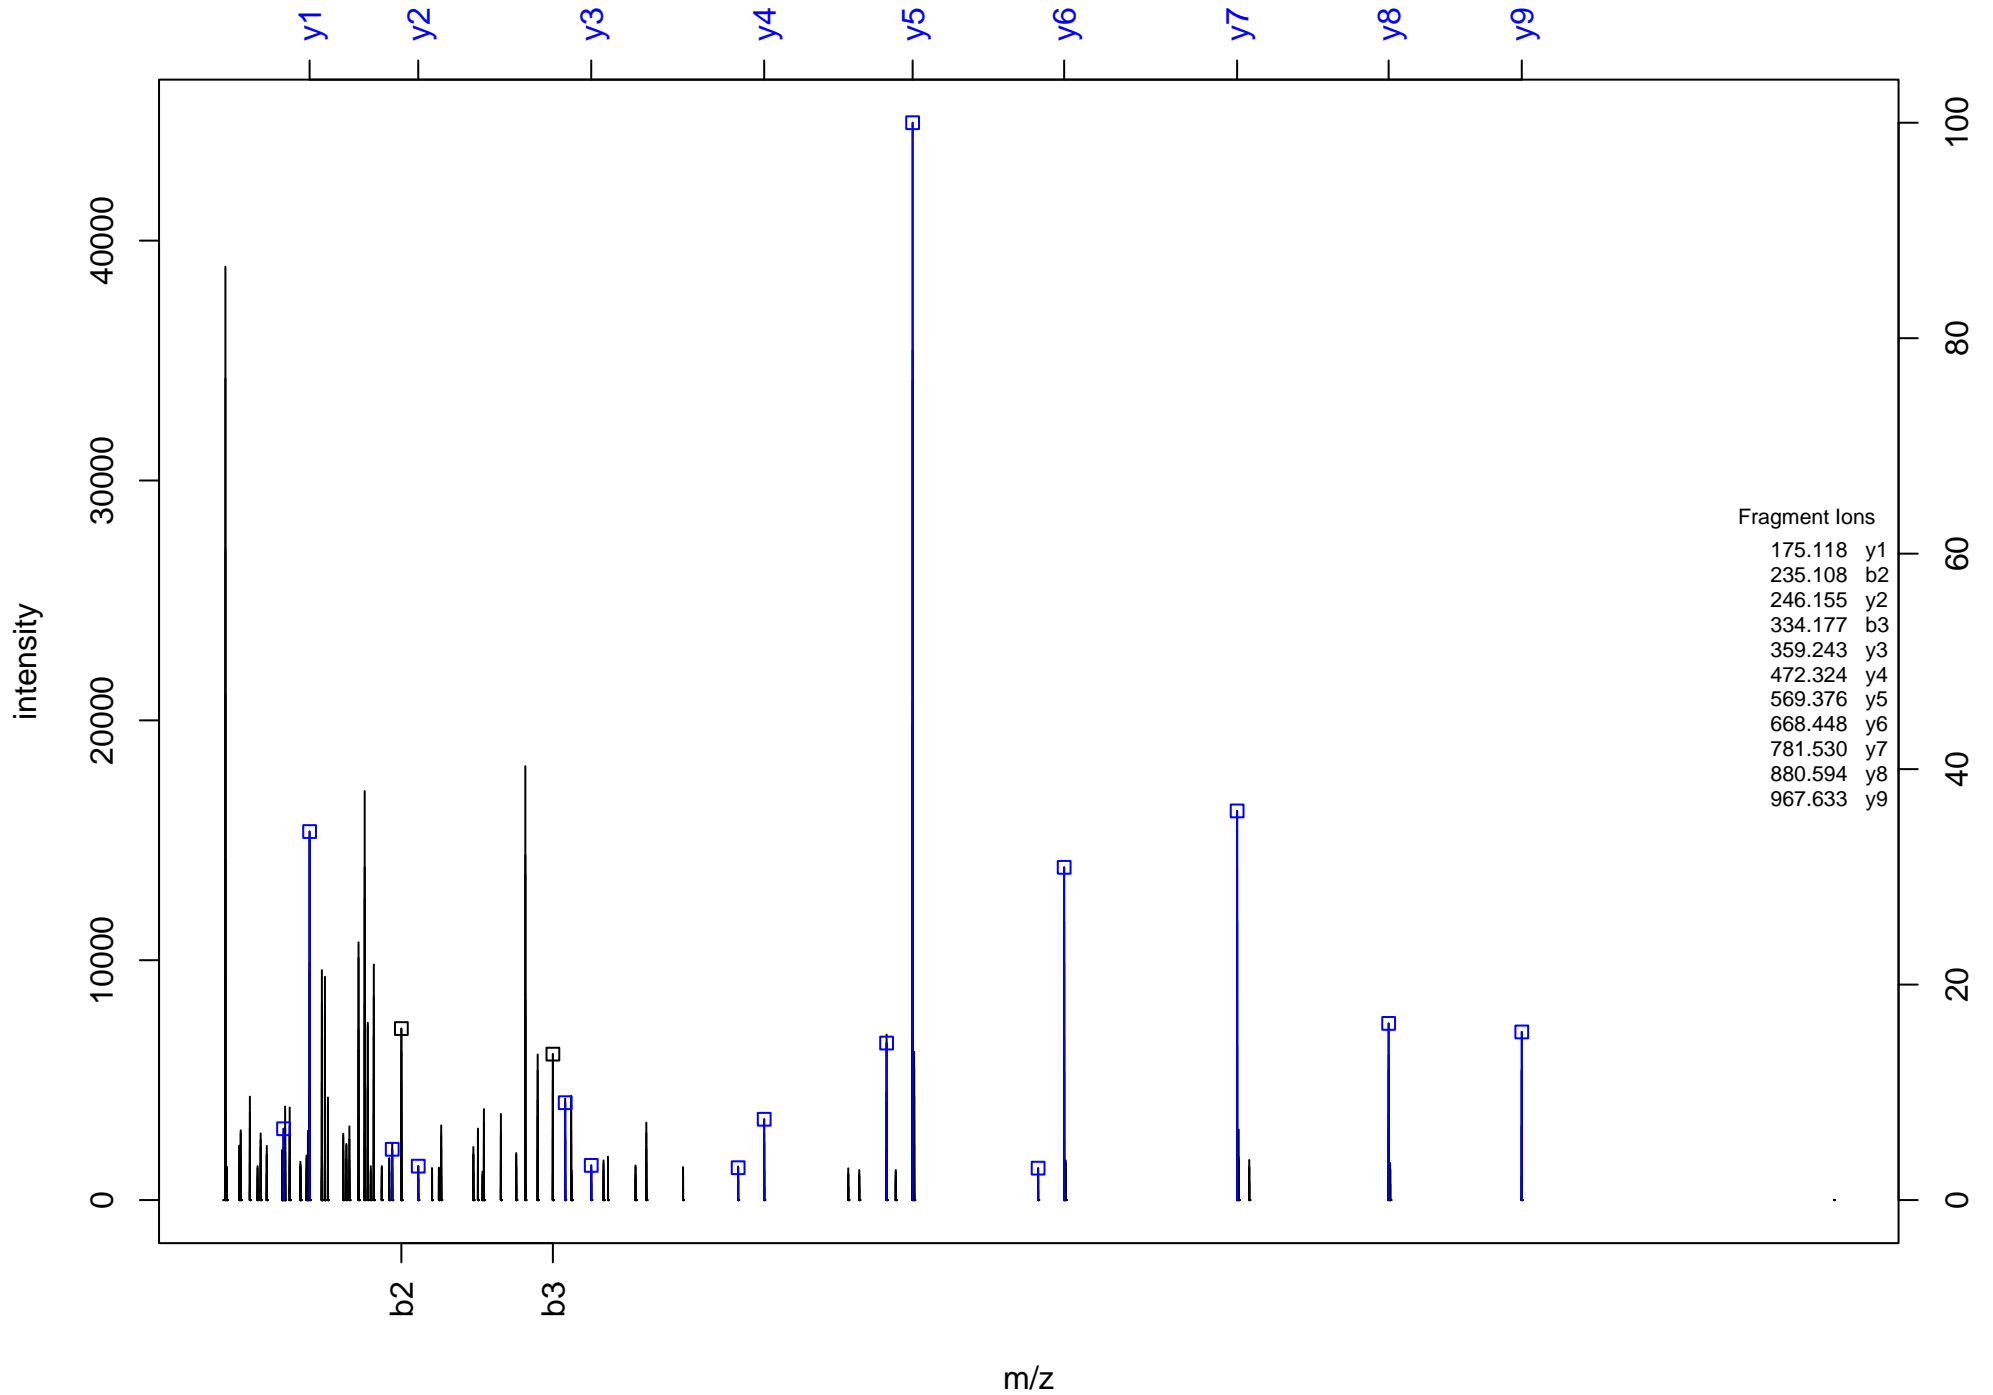

Supplement: mmc1.pdf [file mmc1.pdf]
