# Supplementary material for: Cellular Proteomic Profiling Using Proximity Labeling by TurboID-NES in Microglial and Neuronal Cell Lines
Source: PubMed Central journal article supplement (PMC10205547; doi:10.1016/j.mcpro.2023.100546), 2023-04-14
Supplement: mmc6.pdf [file mmc6.pdf]

**Supplemental:**

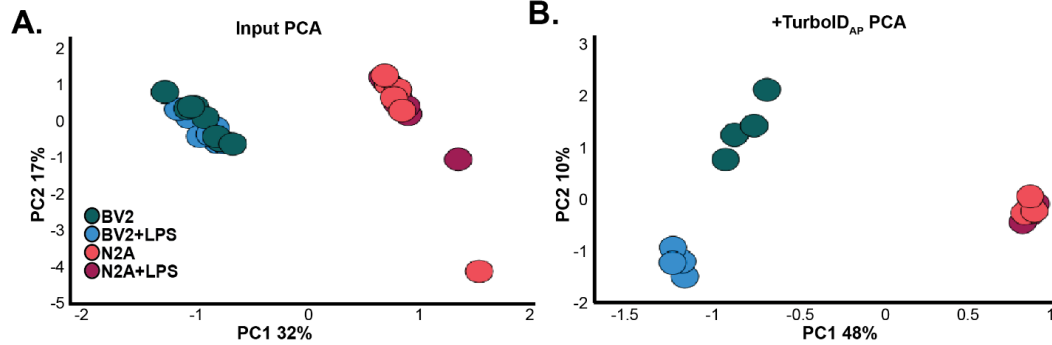

**SF1. Dimension reduction of whole-cell and transduced AP samples.** **A.** Principal component analysis (PCA) of whole-cell samples. Principal component 1 (PC1) accounts for ~32% of variance across which samples distinguish by cell type. **B.** PCA on TurboID labeled and biotin enriched samples indicates that PC1 accounts for ~48% of the variance and along this axis samples cluster by cell-type. PC2 accounts for 10% of the variance, along this axis, BV2 samples and not N2A samples cluster according to LPS treatment.

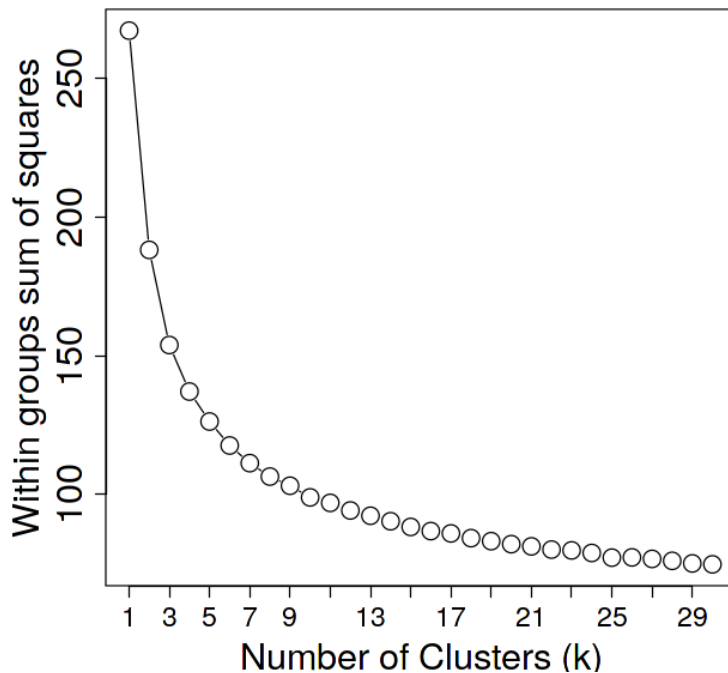

**SF2. Optimization of cluster number using the Elbow-Curve Method.** Mathematical determination of the optimal number of clusters for the clustering analysis performed in Figure 3.

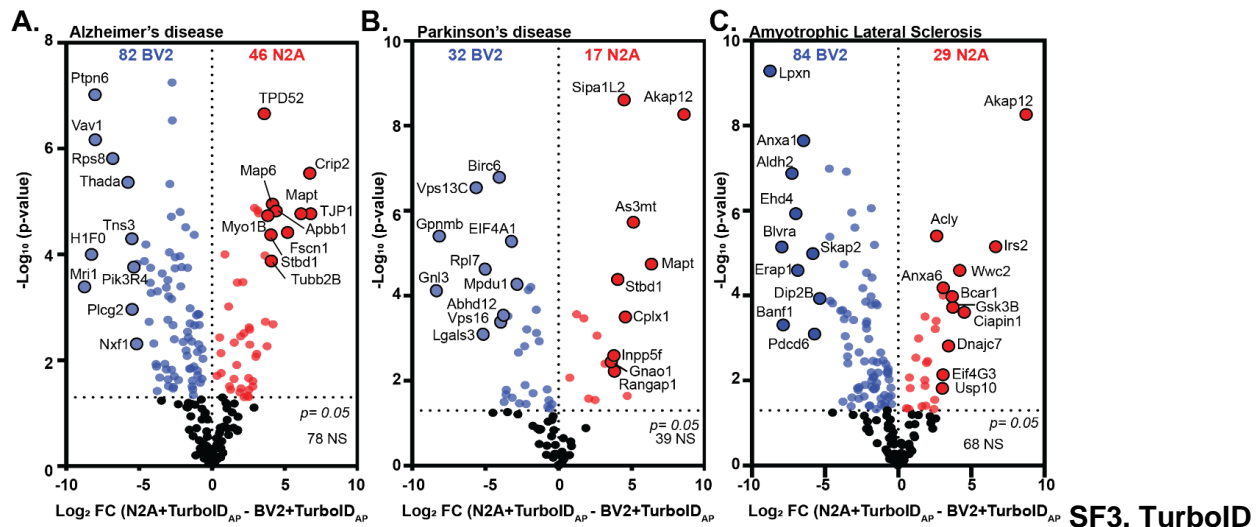

**SF3. TurbolD labels cellularly distinct proteins with relevance to neurodegenerative disease.** Volcano plot representations of cellularly-distinct proteins labeled by TurbolD (derived from significant DEP dataset in Fig 4A), and respective disease relevance. **A.** Mapping proteins onto the Alzheimer's disease (AD) AD MAGMA dataset, there are 82 AD-associated proteins enriched in biotin-labeled BV2 proteins and 46 AD-related proteins enriched in biotin-labeled N2A proteins. **B.** Mapping biotin-labeled and cellularly distinct proteins onto the Parkinson's disease (PD) MAGMA dataset, there are 32 PD-relevant proteins in the BV2 biotin-labeled proteome and 17 PD-relevant proteins in the N2A biotin-labeled proteome. **C.** Mapping proteins onto the Amyotrophic lateral Sclerosis (ALS) and Frontotemporal dementia (FTD) MAGMA dataset, there are 84 ALS/FTD-relevant BV2 proteins and 29 proteins in the N2A biotin-labeled proteins

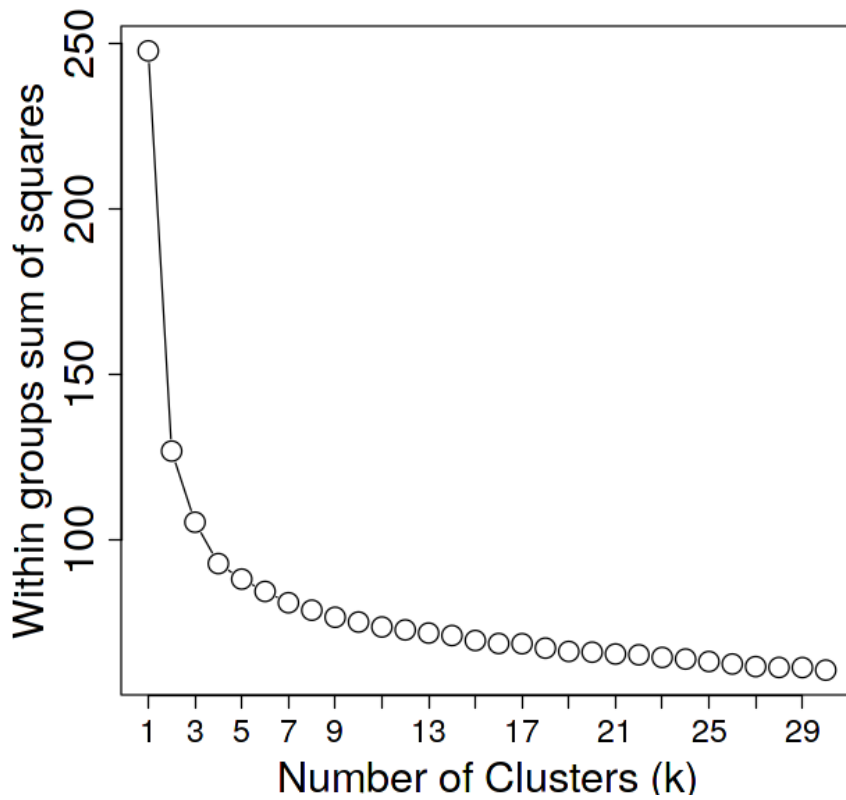

**SF4. Optimization of cluster number using the Elbow-Curve Method.** Mathematical determination of the optimal number of clusters for the clustering analysis performed in Figure 6

**Cluster differences (BV2+LPS+AP-BV2+AP)**

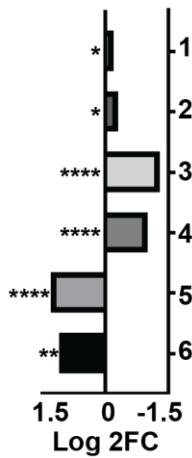

**SF5. Log<sub>2</sub> FC of LPS driven changes between AP samples across all clusters.** Bar-graph representation of the average Log<sub>2</sub>FC between BV2+TurboID+LPS AP and BV2+TurboID AP

samples at the cluster-level. Clusters 1 and 2 show a minimal impact of LPS on the transduced AP proteomes (**Cluster 1**: Log2FC = -0.2,  $p = 0.015$  & **Cluster 2**: Log2FC = -0.3,  $p = 0.015$ ). Clusters 3 and 4 show a robust LPS-mediated decrease in proteins in BV2 AP (**Cluster 3**: Log2FC = -1.3,  $p = 1.49 \times 10^{-5}$  & **Cluster 4**: Log2FC = -1.0,  $p = 9.55 \times 10^{-5}$ ). Clusters 5 and 6 identify an LPS-mediated increase in protein abundance within BV2 AP samples (**Cluster 5**: Log2FC = 1.3,  $p = 1.37 \times 10^{-5}$  & **Cluster 6**: Log2FC = 1.1,  $p = 0.005$ ).

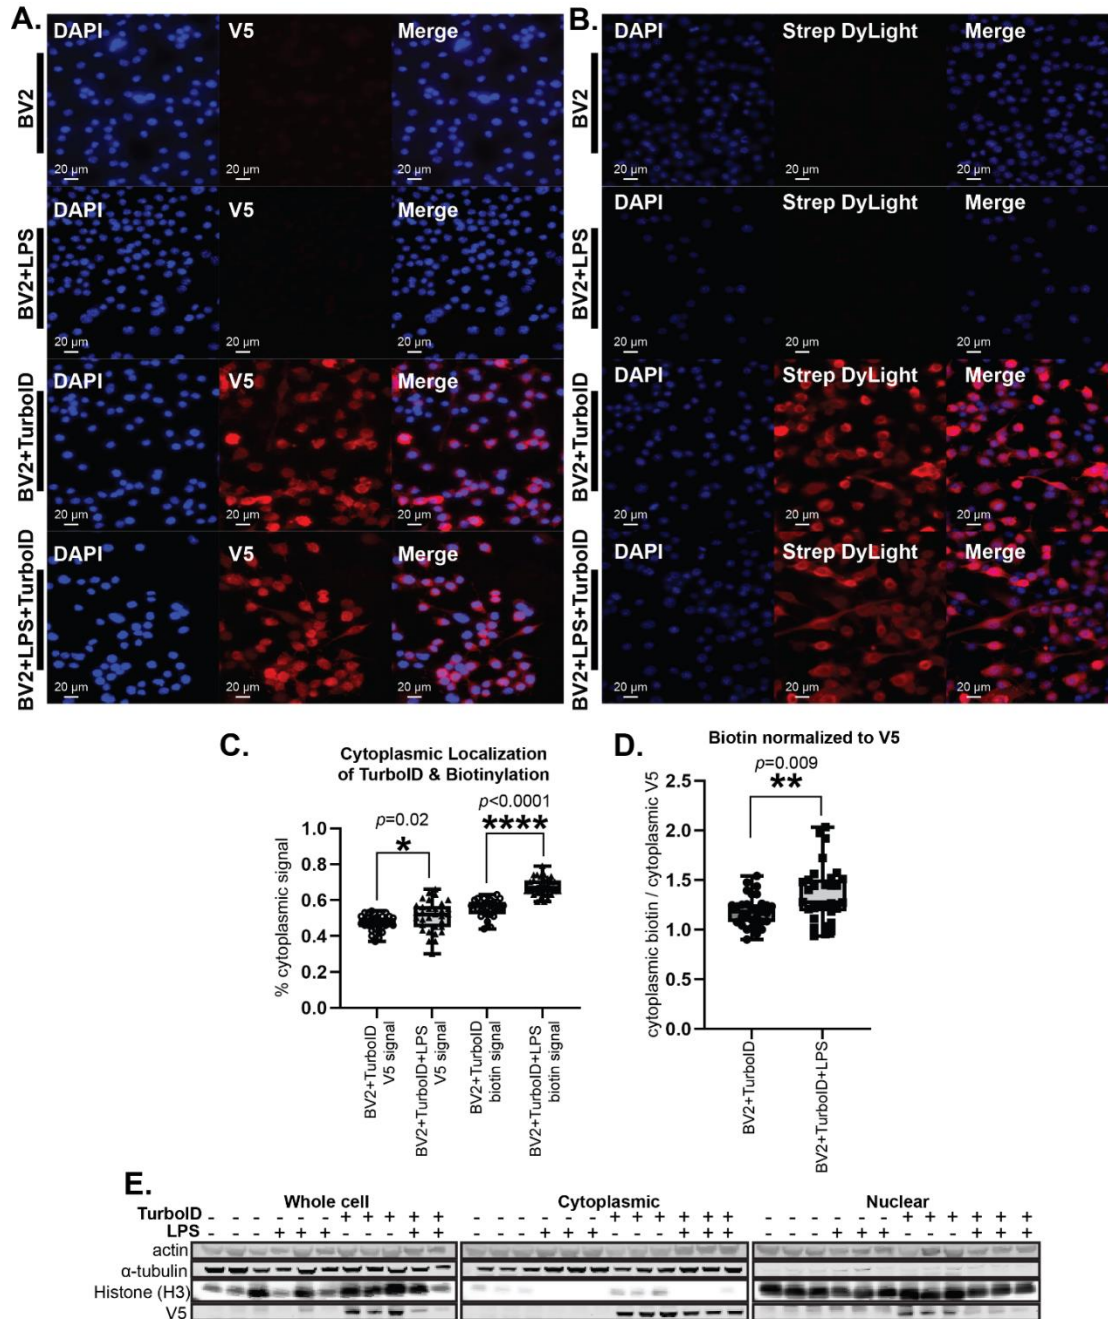

**SF6 LPS challenge slightly increases cytosolic direction of TurbolD and biotinylation of proteins.** **A.** Immunofluorescence (IF) visualizing TurbolD (V5, red) and nuclei (DAPI, blue) localization in transduced and untransduced BV2 cells with and without LPS challenge. Localization of V5-TurbolD remains cytosolic under LPS challenge. **B.** IF visualizing biotinylation

of proteins (StrepDylight, red) and nuclei (DAPI, blue) in contexts of LPS challenge in transduced and untransduced BV2 cells. Biotinylation of proteins remains cytosolic under LPS challenge. **C.** Colocalization analysis of the area of cytoplasmic V5 signal (*left two box-plots*) and cytoplasmic biotinylation signal (*right two box-plots*) indicates a significant increase in cytosolic V5 and biotinylated proteins with LPS challenge. Significant p values were determined using the two-tailed Mann-Whitney test. **D.** Biotinylation signals normalized to V5 signals within the cytoplasm. After normalizing the biotinylation intensity values to V5 intensity values, there is a significant increase in cytosolic biotinylation of proteins with LPS. Significant p values were determined using the two-tailed Mann-Whitney test. **E.** Western blot (WB) verification of subcellular-fractionation experiments of transduced and untransduced BV2 cells with and without LPS challenge (n=3 /group). Using  $\beta$ -actin as a loading control,  $\alpha$ -tubulin as a cytoplasmic marker, histone H3 as a nuclear marker, and V5 as a marker for TurboID, we can confirm purification of sub-cellular fractions with the decrease in  $\alpha$ -tubulin signal in the nuclear fraction as compared with the whole cell and cytoplasmic fractions and a decrease in histone H3 in the cytoplasmic fraction as compared with the whole cell and cytoplasmic fractions. With actin signal intensity remaining constant as a loading control, there is no apparent difference in cytoplasmic V5 intensity with LPS challenge.
